# Supplementary material for: Peptide Location Fingerprinting Reveals Tissue Region-specific Differences in Protein Structures in an Ageing Human Organ
Source: Preprints.org preprint supplement (doi:10.20944/preprints202107.0670.v1), 2021-07-29
Supplement: Supplementary file 1 [file Table S1_Peptide Report for Posterior inner AF.xlsx]

## Sheet: Peptide Report for Posterior IA
Table S1: MS/MS-identified peptides and protein in young and aged posterior inner AF
MS/MS sample name	Protein name	Uniprot accession numbers	Alternate IDs	Protein molecular weight (Da)	Exclusive unique peptide count	Exclusive unique spectrum count	Exclusive spectrum count	Peptide sequence	Previous amino acid	Next amino acid	Best Peptide identification probability	Best Mascot Ion Score	Best Mascot Identity Score	Best Mascot Homology Score	Best Mascot Delta Ion Score	Number of identified +1H spectra	Number of identified +2H spectra	Number of identified +3H spectra	Number of identified +4H spectra	Number of enzymatic termini	Calculated +1H Peptide Mass (AMU)	Median Retention Time	Total TIC	Peptide start index	Peptide stop index
Mudpit_Aged L3_4 Posterior NP IAF	Prelamin-A/C OS=Homo sapiens GN=LMNA PE=1 SV=1	P02545	LMNA	74140.7	2	2	2	ITESEEVVSR	R	E	0.977	30.4	27.4	14.9	30.4	0	1	0	0	2	1148.58	2084.94	3980210	63	72
Mudpit_Aged L3_4 Posterior NP IAF	Prelamin-A/C OS=Homo sapiens GN=LMNA PE=1 SV=1	P02545	LMNA	74140.7	2	2	2	SLETENAGLR	R	L	0.997	43.3	27.7	15.7	43.3	0	1	0	0	2	1089.55	2581.95	6665520	51	60
Mudpit_Aged L3_4 Posterior NP IAF	HCG2039812, isoform CRA_b (Fragment) OS=Homo sapiens GN=KRT6A PE=2 SV=1	A0A0S2Z428,A8K2I0,B4DRR0,B4DRU6,P02538	KRT6A	60046.4	3	3	3	AIGGGLSSVGGGSSTIK	R	Y	0.989	33.3	26.4	15.1	33.3	0	1	0	0	2	1447.78	4263.02	2781510	534	550
Mudpit_Aged L3_4 Posterior NP IAF	HCG2039812, isoform CRA_b (Fragment) OS=Homo sapiens GN=KRT6A PE=2 SV=1	A0A0S2Z428,A8K2I0,B4DRR0,B4DRU6,P02538	KRT6A	60046.4	3	3	3	QLDSIVGER	R	G	0.996	38.3	27.7	26.2	27.5	0	1	0	0	2	1016.54	3555.6	7640320	224	232
Mudpit_Aged L3_4 Posterior NP IAF	HCG2039812, isoform CRA_b (Fragment) OS=Homo sapiens GN=KRT6A PE=2 SV=1	A0A0S2Z428,A8K2I0,B4DRR0,B4DRU6,P02538	KRT6A	60046.4	3	3	3	SGFSSVSVSR	R	S	0.997	36.4	25	20	31.7	0	1	0	0	2	1012.51	3002.82	10898200	31	40
Mudpit_Aged L3_4 Posterior NP IAF	Vitamin D-binding protein OS=Homo sapiens GN=GC PE=1 SV=1	D6RF35	GC	53021.2	11	16	98	AKLPDATPTELAK	K	L	0.974	26.3	25.2	17.1	0	0	1	0	0	2	1354.76	4288.31	4365450	428	440
Mudpit_Aged L3_4 Posterior NP IAF	Vitamin D-binding protein OS=Homo sapiens GN=GC PE=1 SV=1	D6RF35	GC	53021.2	11	16	98	EDFTSLSLVLYSR	K	K	0.997	106	27.3	19.6	106	0	1	0	0	2	1529.78	9116.99	44876900	38	50
Mudpit_Aged L3_4 Posterior NP IAF	Vitamin D-binding protein OS=Homo sapiens GN=GC PE=1 SV=1	D6RF35	GC	53021.2	11	16	98	ELSSFIDK	K	G	0.99	45.7	25.5	15.9	45.7	0	3	0	0	2	938.483	4588.74	53102600	395	402
Mudpit_Aged L3_4 Posterior NP IAF	Vitamin D-binding protein OS=Homo sapiens GN=GC PE=1 SV=1	D6RF35	GC	53021.2	11	16	98	FPSGTFEQVSQLVK	K	E	0.997	107	27	19.7	107	0	10	0	0	2	1566.82	8447.12	165392000	52	65
Mudpit_Aged L3_4 Posterior NP IAF	Vitamin D-binding protein OS=Homo sapiens GN=GC PE=1 SV=1	D6RF35	GC	53021.2	11	16	98	GQELCADYSENTFTEYK	K	K	0.994	32.7	25	15	32.7	0	1	0	0	2	2055.85	5965.14	2519930	403	419
Mudpit_Aged L3_4 Posterior NP IAF	Vitamin D-binding protein OS=Homo sapiens GN=GC PE=1 SV=1	D6RF35	GC	53021.2	11	16	98	HLSLLTTLSNR	K	V	0.997	49.4	26.7	16.1	49.4	0	3	2	0	2	1254.72	7052.39	117745000	208	218
Mudpit_Aged L3_4 Posterior NP IAF	Vitamin D-binding protein OS=Homo sapiens GN=GC PE=1 SV=1	D6RF35	GC	53021.2	11	16	98	HQPQEFPTYVEPTNDEICEAFR	K	K	0.997	43.8	31.2	15.7	43.8	0	1	1	0	2	2708.19	9044.38	14144100	128	149
Mudpit_Aged L3_4 Posterior NP IAF	Vitamin D-binding protein OS=Homo sapiens GN=GC PE=1 SV=1	D6RF35	GC	53021.2	11	16	98	KELSSFIDK	K	G	0.997	51	25.5	19.8	47.3	0	5	4	0	2	1066.58	4704.06	67339600	394	402
Mudpit_Aged L3_4 Posterior NP IAF	Vitamin D-binding protein OS=Homo sapiens GN=GC PE=1 SV=1	D6RF35	GC	53021.2	11	16	98	LPDATPTELAK	K	L	0.997	47.1	25	15.9	0	0	5	0	0	2	1155.63	4278.62	69245400	430	440
Mudpit_Aged L3_4 Posterior NP IAF	Vitamin D-binding protein OS=Homo sapiens GN=GC PE=1 SV=1	D6RF35	GC	53021.2	11	16	98	THLPEVFLSK	R	V	0.997	58.8	25.1	32.5	43	0	4	10	0	2	1170.65	8416.69	148557000	354	363
Mudpit_Aged L3_4 Posterior NP IAF	Vitamin D-binding protein OS=Homo sapiens GN=GC PE=1 SV=1	D6RF35	GC	53021.2	11	16	98	VPTADLEDVLPLAEDITNILSK	K	C	0.997	112	25	20	112	0	19	28	0	2	2366.27	9890.67	92090900	243	264
Mudpit_Aged L3_4 Posterior NP IAF	Keratin, type I cytoskeletal 14 OS=Homo sapiens GN=KRT14 PE=1 SV=4	P02533	KRT14	51562.5	2	2	3	APSTYGGGLSVSSSR	R	F	0.997	85	27	18.3	85	0	2	0	0	2	1425.7	3246.99	6253670	42	56
Mudpit_Aged L3_4 Posterior NP IAF	Keratin, type I cytoskeletal 14 OS=Homo sapiens GN=KRT14 PE=1 SV=4	P02533	KRT14	51562.5	2	2	3	GQVGGDVNVEMDAAPGVDLSR	R	I	0.953	26.5	26.1	14.7	26.5	0	1	0	0	2	2085.99	6087.87	648560	262	282
Mudpit_Aged L3_4 Posterior NP IAF	cDNA PSEC0172 fis, clone PLACE1011835, highly similar to Procollagen C-endopeptidase enhancer 2 OS=Homo sapiens PE=2 SV=1	B3KQT8,Q53EK6,Q9UKZ9	PCOLCE2	45717.3	5	6	29	DGSLHATVSIINIYK	R	E	0.997	68.1	26.4	17.3	68.1	0	0	1	0	2	1630.88	8572.88	5826710	329	343
Mudpit_Aged L3_4 Posterior NP IAF	cDNA PSEC0172 fis, clone PLACE1011835, highly similar to Procollagen C-endopeptidase enhancer 2 OS=Homo sapiens PE=2 SV=1	B3KQT8,Q53EK6,Q9UKZ9	PCOLCE2	45717.3	5	6	29	EGNLAIQQAGK	K	N	0.996	40.8	25	15.6	40.8	0	1	0	0	2	1128.6	2816.39	2657500	344	354
Mudpit_Aged L3_4 Posterior NP IAF	cDNA PSEC0172 fis, clone PLACE1011835, highly similar to Procollagen C-endopeptidase enhancer 2 OS=Homo sapiens PE=2 SV=1	B3KQT8,Q53EK6,Q9UKZ9	PCOLCE2	45717.3	5	6	29	FIDLESDNLCR	R	Y	0.997	57.2	25	18.8	55	0	12	0	0	2	1382.63	6615.4	76887600	77	87
Mudpit_Aged L3_4 Posterior NP IAF	cDNA PSEC0172 fis, clone PLACE1011835, highly similar to Procollagen C-endopeptidase enhancer 2 OS=Homo sapiens PE=2 SV=1	B3KQT8,Q53EK6,Q9UKZ9	PCOLCE2	45717.3	5	6	29	GLNYIIMGQVGEDGR	R	G	0.997	123	29.1	20.7	123	0	13	0	0	2	1637.8	7236.94	134165000	373	387
Mudpit_Aged L3_4 Posterior NP IAF	cDNA PSEC0172 fis, clone PLACE1011835, highly similar to Procollagen C-endopeptidase enhancer 2 OS=Homo sapiens PE=2 SV=1	B3KQT8,Q53EK6,Q9UKZ9	PCOLCE2	45717.3	5	6	29	YDYVAVFNGGEVNDAR	R	R	0.997	84.6	25	18.3	84.6	0	2	0	0	2	1788.82	7087.64	11662600	210	225
Mudpit_Aged L3_4 Posterior NP IAF	Epididymis luminal protein 4 OS=Homo sapiens GN=YWHAZ PE=2 SV=1	D0PNI1,P63104	YWHAZ	27745.9	3	3	5	GIVDQSQQAYQEAFEISK	K	K	0.997	106	25.3	19.6	106	0	3	0	0	2	2040.99	7905.88	8500190	140	157
Mudpit_Aged L3_4 Posterior NP IAF	Epididymis luminal protein 4 OS=Homo sapiens GN=YWHAZ PE=2 SV=1	D0PNI1,P63104	YWHAZ	27745.9	3	3	5	TAFDEAIAELDTLSEESYK	K	D	0.997	83.2	28	18.2	83.2	0	1	0	0	2	2131.99	9356.64	7209810	194	212
Mudpit_Aged L3_4 Posterior NP IAF	Epididymis luminal protein 4 OS=Homo sapiens GN=YWHAZ PE=2 SV=1	D0PNI1,P63104	YWHAZ	27745.9	3	3	5	YLAEVAAGDDK	R	K	0.997	46.3	26.2	15.9	46.3	0	1	0	0	2	1151.56	2980.17	6454990	128	138
Mudpit_Aged L3_4 Posterior NP IAF	cDNA FLJ14473 fis, clone MAMMA1001080, highly similar to Homo sapiens SNC73 protein (SNC73) mRNA OS=Homo sapiens PE=2 SV=1	Q96K68		53087.4	6	7	34	DASGVTFTWTPSSGK	R	S	0.997	96.2	26.2	19	96.2	0	8	0	0	2	1540.73	6809.7	208742000	295	309
Mudpit_Aged L3_4 Posterior NP IAF	cDNA FLJ14473 fis, clone MAMMA1001080, highly similar to Homo sapiens SNC73 protein (SNC73) mRNA OS=Homo sapiens PE=2 SV=1	Q96K68		53087.4	6	7	34	GLEWVSSISSR	K	S	0.96	29.4	28.4	14.8	29.4	0	1	0	0	2	1220.63	6945.86	5494840	63	73
Mudpit_Aged L3_4 Posterior NP IAF	cDNA FLJ14473 fis, clone MAMMA1001080, highly similar to Homo sapiens SNC73 protein (SNC73) mRNA OS=Homo sapiens PE=2 SV=1	Q96K68		53087.4	6	7	34	QEPSQGTTTFAVTSILR	R	V	0.997	126	27.3	20.9	126	0	10	5	0	2	1835.95	8132.75	401563000	424	440
Mudpit_Aged L3_4 Posterior NP IAF	cDNA FLJ14473 fis, clone MAMMA1001080, highly similar to Homo sapiens SNC73 protein (SNC73) mRNA OS=Homo sapiens PE=2 SV=1	Q96K68		53087.4	6	7	34	SAVQGPPER	K	D	0.997	41.3	26.7	17.4	39.4	0	1	0	0	2	940.485	1555.9	390114	310	318
Mudpit_Aged L3_4 Posterior NP IAF	cDNA FLJ14473 fis, clone MAMMA1001080, highly similar to Homo sapiens SNC73 protein (SNC73) mRNA OS=Homo sapiens PE=2 SV=1	Q96K68		53087.4	6	7	34	TPLTATLSK	K	S	0.997	54.6	26.9	19.9	51.1	0	2	0	0	2	931.546	3673.53	20740200	354	362
Mudpit_Aged L3_4 Posterior NP IAF	cDNA FLJ14473 fis, clone MAMMA1001080, highly similar to Homo sapiens SNC73 protein (SNC73) mRNA OS=Homo sapiens PE=2 SV=1	Q96K68		53087.4	6	7	34	WLQGSQELPR	R	E	0.997	58.6	25	16.7	58.6	0	7	0	0	2	1213.63	5429.52	759978000	405	414
Mudpit_Aged L3_4 Posterior NP IAF	Immunoglobulin delta heavy chain OS=Homo sapiens PE=1 SV=1	IGD_HUMAN		0	5	7	15	DSYYMTSSQLSTPLQQWR	?	?	0.997	97.2	32.4	19.1	97.2	0	1	1	0	2	2191.01	8580.9	11083000	0	0
Mudpit_Aged L3_4 Posterior NP IAF	Immunoglobulin delta heavy chain OS=Homo sapiens PE=1 SV=1	IGD_HUMAN		0	5	7	15	NQFSLNLR	?	?	0.99	33.3	25.7	20.6	27.8	0	2	0	0	2	991.532	5910.28	8146530	0	0
Mudpit_Aged L3_4 Posterior NP IAF	Immunoglobulin delta heavy chain OS=Homo sapiens PE=1 SV=1	IGD_HUMAN		0	5	7	15	SLEVSYVTDHGPM	?	?	0.997	80.6	25	18	80.6	0	3	0	0	2	1450.65	4989.33	15514600	0	0
Mudpit_Aged L3_4 Posterior NP IAF	Immunoglobulin delta heavy chain OS=Homo sapiens PE=1 SV=1	IGD_HUMAN		0	5	7	15	VPTGGVEEGLLER	?	?	0.997	78.4	25.9	17.9	78.4	0	4	0	0	2	1355.72	5572.09	130512000	0	0
Mudpit_Aged L3_4 Posterior NP IAF	Immunoglobulin delta heavy chain OS=Homo sapiens PE=1 SV=1	IGD_HUMAN		0	5	7	15	VTISVDTSR	?	?	0.997	51.4	29.2	27.6	40	0	4	0	0	2	977.526	2969.36	24722500	0	0
Mudpit_Aged L3_4 Posterior NP IAF	IGK@ protein OS=Homo sapiens GN=IGK@ PE=1 SV=1	Q6P5S8	IGK	25773.1	9	14	176	DSTYSLSSTLTLSK	K	A	0.997	99.1	26.1	19.2	99.1	0	83	6	0	2	1502.76	7039.83	2796130000	192	205
Mudpit_Aged L3_4 Posterior NP IAF	IGK@ protein OS=Homo sapiens GN=IGK@ PE=1 SV=1	Q6P5S8	IGK	25773.1	9	14	176	FSGSGSGTDFTLTITR	R	L	0.997	120	33.7	20.5	120	0	5	0	0	2	1646.8	7058.83	35213600	83	98
Mudpit_Aged L3_4 Posterior NP IAF	IGK@ protein OS=Homo sapiens GN=IGK@ PE=1 SV=1	Q6P5S8	IGK	25773.1	9	14	176	LLIYGASSR	R	A	0.997	41.1	26.6	33.7	23	0	4	0	0	2	979.557	4436.31	66790800	67	75
Mudpit_Aged L3_4 Posterior NP IAF	IGK@ protein OS=Homo sapiens GN=IGK@ PE=1 SV=1	Q6P5S8	IGK	25773.1	9	14	176	SGTASVVCLLNNFYPR	K	E	0.997	83	27.3	18.2	83	0	11	1	0	2	1798.88	9110.05	400750000	149	164
Mudpit_Aged L3_4 Posterior NP IAF	IGK@ protein OS=Homo sapiens GN=IGK@ PE=1 SV=1	Q6P5S8	IGK	25773.1	9	14	176	TVAAPSVFIFPPSDEQLK	R	S	0.997	77.4	26.7	17.8	77.4	0	21	7	0	2	1946.03	9088.92	5317470000	131	148
Mudpit_Aged L3_4 Posterior NP IAF	IGK@ protein OS=Homo sapiens GN=IGK@ PE=1 SV=1	Q6P5S8	IGK	25773.1	9	14	176	VDNALQSGNSQESVTEQDSK	K	D	0.997	135	25	21.4	135	0	13	13	0	2	2135.97	2546.39	2895170000	172	191
Mudpit_Aged L3_4 Posterior NP IAF	IGK@ protein OS=Homo sapiens GN=IGK@ PE=1 SV=1	Q6P5S8	IGK	25773.1	9	14	176	VDNALQSGNSQESVTEQDSKDSTYSLSSTLTLSK	K	A	0.997	81.5	25	18.1	81.5	0	0	6	0	2	3619.71	7402.2	19141900	172	205
Mudpit_Aged L3_4 Posterior NP IAF	IGK@ protein OS=Homo sapiens GN=IGK@ PE=1 SV=1	Q6P5S8	IGK	25773.1	9	14	176	VQWKVDNALQSGNSQESVTEQDSK	K	D	0.997	94.1	25.3	18.9	94.1	0	0	1	0	2	2677.27	5836.02	5931070	168	191
Mudpit_Aged L3_4 Posterior NP IAF	IGK@ protein OS=Homo sapiens GN=IGK@ PE=1 SV=1	Q6P5S8	IGK	25773.1	9	14	176	VYACEVTHQGLSSPVTK	K	S	0.997	105	26.1	19.6	105	0	2	3	0	2	1876.91	4787.69	74200500	213	229
Mudpit_Aged L3_4 Posterior NP IAF	IGHV1-46 protein (Fragment) OS=Homo sapiens GN=IGHV1-46 PE=4 SV=1	A0A0F7SYK7,HV146_HUMAN,Q9UL92	IGHV1-46	0	2	2	2	DTSTSTVYMELSSLR	R	S	0.997	80.7	25.4	18	80.7	0	0	1	0	2	1689.8	8229.33	7310160	0	0
Mudpit_Aged L3_4 Posterior NP IAF	IGHV1-46 protein (Fragment) OS=Homo sapiens GN=IGHV1-46 PE=4 SV=1	A0A0F7SYK7,HV146_HUMAN,Q9UL92	IGHV1-46	0	2	2	2	QAPGQGLEWMGIINPSGGSTSYAQK	R	F	0.997	55	25.5	16.4	55	0	1	0	0	2	2577.24	9026.97	2218640	0	0
Mudpit_Aged L3_4 Posterior NP IAF	Alpha-1-antitrypsin short transcript variant 1C4 OS=Homo sapiens GN=SERPINA1 PE=2 SV=1	A0A1L7B5J3_HUMAN		0	2	6	17	FLEAIPMSIPPEVK	?	?	0.997	56.6	26.5	16.5	56.6	0	11	3	0	2	1570.86	7980.16	144202000	0	0
Mudpit_Aged L3_4 Posterior NP IAF	Alpha-1-antitrypsin short transcript variant 1C4 OS=Homo sapiens GN=SERPINA1 PE=2 SV=1	A0A1L7B5J3_HUMAN		0	2	6	17	MFLEAIPMSIPPEVK	?	?	0.997	46	27.3	15.9	46	0	3	0	0	2	1701.9	8947.05	29319600	0	0
Mudpit_Aged L3_4 Posterior NP IAF	Carboxypeptidase N subunit 2 OS=Homo sapiens GN=CPN2 PE=1 SV=3	P22792	CPN2	60558.7	3	3	5	AGGSWDLAVQER	K	A	0.997	59.8	25.6	16.7	59.8	0	2	0	0	2	1288.63	5337.55	9091890	464	475
Mudpit_Aged L3_4 Posterior NP IAF	Carboxypeptidase N subunit 2 OS=Homo sapiens GN=CPN2 PE=1 SV=3	P22792	CPN2	60558.7	3	3	5	DHLGFQVTWPDESK	R	A	0.949	30.3	25	14.9	30.3	0	0	1	0	2	1658.78	7423.61	7192340	450	463
Mudpit_Aged L3_4 Posterior NP IAF	Carboxypeptidase N subunit 2 OS=Homo sapiens GN=CPN2 PE=1 SV=3	P22792	CPN2	60558.7	3	3	5	LELLSLSK	K	N	0.99	48.5	25	32.7	31.8	0	2	0	0	2	902.556	6896.83	14282400	363	370
Mudpit_Aged L3_4 Posterior NP IAF	Target of Nesh-SH3 OS=Homo sapiens GN=ABI3BP PE=1 SV=1	D3YTG3	ABI3BP	195326	19	23	126	APLWPEEPK	K	T	0.992	31.4	25.9	15	31.4	0	1	0	0	2	1066.56	5306.24	16571900	1161	1169
Mudpit_Aged L3_4 Posterior NP IAF	Target of Nesh-SH3 OS=Homo sapiens GN=ABI3BP PE=1 SV=1	D3YTG3	ABI3BP	195326	19	23	126	DAIWTERPFNSDSYSECK	R	G	0.988	39.8	25	15.5	39.8	0	2	0	0	2	2205.94	6919.72	5475250	1648	1665
Mudpit_Aged L3_4 Posterior NP IAF	Target of Nesh-SH3 OS=Homo sapiens GN=ABI3BP PE=1 SV=1	D3YTG3	ABI3BP	195326	19	23	126	DNVEGGIWSK	K	I	0.997	53.1	26.2	16.3	53.1	0	7	0	0	2	1104.53	4848.54	138022000	203	212
Mudpit_Aged L3_4 Posterior NP IAF	Target of Nesh-SH3 OS=Homo sapiens GN=ABI3BP PE=1 SV=1	D3YTG3	ABI3BP	195326	19	23	126	DVLLPHKPYPEVSQSEPAPLETR	K	G	0.991	51.2	25	16.2	51.2	0	0	3	0	2	2602.35	7188.08	29092200	1263	1285
Mudpit_Aged L3_4 Posterior NP IAF	Target of Nesh-SH3 OS=Homo sapiens GN=ABI3BP PE=1 SV=1	D3YTG3	ABI3BP	195326	19	23	126	FTEAIVDAEPK	K	Y	0.997	77.9	27	17.9	77.9	0	20	0	0	2	1219.62	4587.35	563386000	88	98
Mudpit_Aged L3_4 Posterior NP IAF	Target of Nesh-SH3 OS=Homo sapiens GN=ABI3BP PE=1 SV=1	D3YTG3	ABI3BP	195326	19	23	126	FVGVQLCNSLR	K	Y	0.997	54.4	27.7	20.7	50.2	0	5	0	0	2	1293.66	6703.77	145726000	1678	1688
Mudpit_Aged L3_4 Posterior NP IAF	Target of Nesh-SH3 OS=Homo sapiens GN=ABI3BP PE=1 SV=1	D3YTG3	ABI3BP	195326	19	23	126	FYNIGDQR	K	G	0.99	37.6	25	15.3	37.6	0	4	0	0	2	1012.48	3763.22	145840000	1701	1708
Mudpit_Aged L3_4 Posterior NP IAF	Target of Nesh-SH3 OS=Homo sapiens GN=ABI3BP PE=1 SV=1	D3YTG3	ABI3BP	195326	19	23	126	IQSTYDQDHTVPAYVPR	K	K	0.997	138	25.3	21.6	138	0	9	15	0	2	1989.97	5229.03	995432000	229	245
Mudpit_Aged L3_4 Posterior NP IAF	Target of Nesh-SH3 OS=Homo sapiens GN=ABI3BP PE=1 SV=1	D3YTG3	ABI3BP	195326	19	23	126	IYLSDSLTGK	K	F	0.997	50.8	26.5	16.2	50.8	0	10	0	0	2	1096.59	5333.37	104346000	1691	1700
Mudpit_Aged L3_4 Posterior NP IAF	Target of Nesh-SH3 OS=Homo sapiens GN=ABI3BP PE=1 SV=1	D3YTG3	ABI3BP	195326	19	23	126	LEGLLLGYGSNVSPNQYFPLPAEGK	K	F	0.997	103	26.1	19.4	103	0	3	1	0	2	2663.37	9187.1	70496000	63	87
Mudpit_Aged L3_4 Posterior NP IAF	Target of Nesh-SH3 OS=Homo sapiens GN=ABI3BP PE=1 SV=1	D3YTG3	ABI3BP	195326	19	23	126	LIPITIIK	K	Q	0.99	32	25	15	32	0	3	0	0	2	910.634	7411.97	60791500	247	254
Mudpit_Aged L3_4 Posterior NP IAF	Target of Nesh-SH3 OS=Homo sapiens GN=ABI3BP PE=1 SV=1	D3YTG3	ABI3BP	195326	19	23	126	LPASLMFEISDALK	K	T	0.997	101	27.2	19.3	101	0	10	0	0	2	1534.82	9126.85	137008000	294	307
Mudpit_Aged L3_4 Posterior NP IAF	Target of Nesh-SH3 OS=Homo sapiens GN=ABI3BP PE=1 SV=1	D3YTG3	ABI3BP	195326	19	23	126	LVPATILEPVLR	K	T	0.997	39.8	25	15.5	39.8	0	1	0	0	2	1320.83	9027.74	63176500	807	818
Mudpit_Aged L3_4 Posterior NP IAF	Target of Nesh-SH3 OS=Homo sapiens GN=ABI3BP PE=1 SV=1	D3YTG3	ABI3BP	195326	19	23	126	LVPSTDLEPGTLR	K	T	0.991	30.5	25.4	14.9	30.5	0	1	0	0	2	1397.76	5593.34	5544150	1017	1029
Mudpit_Aged L3_4 Posterior NP IAF	Target of Nesh-SH3 OS=Homo sapiens GN=ABI3BP PE=1 SV=1	D3YTG3	ABI3BP	195326	19	23	126	NPLGEGPVSNTVAFSTESADPR	K	V	0.997	149	25.3	23	148	0	10	5	0	2	2245.07	6675.58	85611600	1617	1638
Mudpit_Aged L3_4 Posterior NP IAF	Target of Nesh-SH3 OS=Homo sapiens GN=ABI3BP PE=1 SV=1	D3YTG3	ABI3BP	195326	19	23	126	QPTVPASGEELENITDFSSSPTR	K	E	0.997	78.3	34.9	17.9	78.3	0	1	0	0	2	2462.17	7793.12	4191970	1468	1490
Mudpit_Aged L3_4 Posterior NP IAF	Target of Nesh-SH3 OS=Homo sapiens GN=ABI3BP PE=1 SV=1	D3YTG3	ABI3BP	195326	19	23	126	TGQQLTSDQLPIK	R	E	0.997	64.9	27.9	17.1	64.9	0	13	0	0	2	1428.77	4856.83	184829000	1726	1738
Mudpit_Aged L3_4 Posterior NP IAF	Target of Nesh-SH3 OS=Homo sapiens GN=ABI3BP PE=1 SV=1	D3YTG3	ABI3BP	195326	19	23	126	VSEPVSAGR	R	D	0.997	37.4	26.7	15.3	37.4	0	1	0	0	2	901.474	1609.66	495585	1639	1647
Mudpit_Aged L3_4 Posterior NP IAF	Target of Nesh-SH3 OS=Homo sapiens GN=ABI3BP PE=1 SV=1	D3YTG3	ABI3BP	195326	19	23	126	YIQKPDNSPCSITDSVK	R	R	0.997	39.1	25.8	15.4	39.1	0	1	0	0	2	1952.93	4461.19	3748510	1507	1523
Mudpit_Aged L3_4 Posterior NP IAF	EGF-containing fibulin-like extracellular matrix protein 2, isoform CRA_a OS=Homo sapiens GN=EFEMP2 PE=4 SV=1	A0A024R5G1,B2RCM5,E9PRU1,H0YET5,H0YEU0,O95967,Q59GI8,Q96TF5,Q9H3D5	EFEMP2,MBP1	49404.1	2	2	2	AGNSQGDFYIR	R	Q	0.98	28.8	25	14.8	28.8	0	1	0	0	2	1227.58	3962.5	23049800	380	390
Mudpit_Aged L3_4 Posterior NP IAF	EGF-containing fibulin-like extracellular matrix protein 2, isoform CRA_a OS=Homo sapiens GN=EFEMP2 PE=4 SV=1	A0A024R5G1,B2RCM5,E9PRU1,H0YET5,H0YEU0,O95967,Q59GI8,Q96TF5,Q9H3D5	EFEMP2,MBP1	49404.1	2	2	2	YMTITSER	R	S	0.987	33.1	25	15.1	33.1	0	1	0	0	2	1000.48	2856.85	20429200	347	354
Mudpit_Aged L3_4 Posterior NP IAF	Myosin-reactive immunoglobulin heavy chain variable region (Fragment) OS=Homo sapiens PE=2 SV=1	Q9UL89		12605.3	2	3	7	QAPGQGLEWMGR	R	I	0.997	44.1	25	46.9	12.9	0	6	0	0	2	1329.64	5512.95	102521000	35	46
Mudpit_Aged L3_4 Posterior NP IAF	Myosin-reactive immunoglobulin heavy chain variable region (Fragment) OS=Homo sapiens PE=2 SV=1	Q9UL89		12605.3	2	3	7	STSTAYMELSSLR	K	S	0.997	60.6	25.3	16.8	60.6	0	1	0	0	2	1445.69	6209.44	26440000	71	83
Mudpit_Aged L3_4 Posterior NP IAF	Adipocyte enhancer-binding protein 1 OS=Homo sapiens GN=AEBP1 PE=1 SV=1	Q8IUX7	AEBP1	130931	18	25	62	AIIAWMEK	R	N	0.99	39.2	27.4	15.4	39.2	0	1	0	0	2	961.518	7251.32	2745960	746	753
Mudpit_Aged L3_4 Posterior NP IAF	Adipocyte enhancer-binding protein 1 OS=Homo sapiens GN=AEBP1 PE=1 SV=1	Q8IUX7	AEBP1	130931	18	25	62	DTPVLSELPEPVVAR	K	F	0.997	55	26	16.4	55	0	3	1	0	2	1621.88	8052.41	31420300	504	518
Mudpit_Aged L3_4 Posterior NP IAF	Adipocyte enhancer-binding protein 1 OS=Homo sapiens GN=AEBP1 PE=1 SV=1	Q8IUX7	AEBP1	130931	18	25	62	EALLTFMEQVHR	K	G	0.996	59.9	27	16.7	59.9	0	0	3	0	2	1473.75	9147.87	44154800	895	906
Mudpit_Aged L3_4 Posterior NP IAF	Adipocyte enhancer-binding protein 1 OS=Homo sapiens GN=AEBP1 PE=1 SV=1	Q8IUX7	AEBP1	130931	18	25	62	EDYEDFEYIR	R	R	0.995	35.1	25	15.2	35.1	0	1	0	0	2	1378.58	7442.63	5229460	242	251
Mudpit_Aged L3_4 Posterior NP IAF	Adipocyte enhancer-binding protein 1 OS=Homo sapiens GN=AEBP1 PE=1 SV=1	Q8IUX7	AEBP1	130931	18	25	62	FPHESELPR	K	E	0.987	52	27.4	16.3	52	0	0	4	0	2	1111.55	4837.55	28612100	880	888
Mudpit_Aged L3_4 Posterior NP IAF	Adipocyte enhancer-binding protein 1 OS=Homo sapiens GN=AEBP1 PE=1 SV=1	Q8IUX7	AEBP1	130931	18	25	62	FTGVITQGR	R	D	0.997	41.2	26.6	15.6	41.2	0	2	0	0	2	978.537	3078.52	48214300	454	462
Mudpit_Aged L3_4 Posterior NP IAF	Adipocyte enhancer-binding protein 1 OS=Homo sapiens GN=AEBP1 PE=1 SV=1	Q8IUX7	AEBP1	130931	18	25	62	GEDEDEVSEAQETPDHAIFR	R	W	0.997	128	25	21	128	0	2	14	0	2	2273.98	5816.11	155182000	794	813
Mudpit_Aged L3_4 Posterior NP IAF	Adipocyte enhancer-binding protein 1 OS=Homo sapiens GN=AEBP1 PE=1 SV=1	Q8IUX7	AEBP1	130931	18	25	62	GEELEEEWTPTEK	K	V	0.994	34.5	25	15.2	34.5	0	1	0	0	2	1576.7	5674.57	3539750	370	382
Mudpit_Aged L3_4 Posterior NP IAF	Adipocyte enhancer-binding protein 1 OS=Homo sapiens GN=AEBP1 PE=1 SV=1	Q8IUX7	AEBP1	130931	18	25	62	ILNPGEYR	R	V	0.99	34.2	28.2	16.2	33	0	1	0	0	2	961.51	3269.81	40387100	945	952
Mudpit_Aged L3_4 Posterior NP IAF	Adipocyte enhancer-binding protein 1 OS=Homo sapiens GN=AEBP1 PE=1 SV=1	Q8IUX7	AEBP1	130931	18	25	62	IYAMEISDNPGEHELGEPEFR	K	Y	0.997	94.8	25	18.9	94.8	0	2	4	0	2	2433.1	8333.57	59143000	599	619
Mudpit_Aged L3_4 Posterior NP IAF	Adipocyte enhancer-binding protein 1 OS=Homo sapiens GN=AEBP1 PE=1 SV=1	Q8IUX7	AEBP1	130931	18	25	62	KGEELEEEWTPTEK	R	V	0.997	76.6	25.5	17.8	76.6	0	2	4	0	2	1704.8	6382.13	28460900	369	382
Mudpit_Aged L3_4 Posterior NP IAF	Adipocyte enhancer-binding protein 1 OS=Homo sapiens GN=AEBP1 PE=1 SV=1	Q8IUX7	AEBP1	130931	18	25	62	LNMQTGATEDDYYDGAWCAEDDAR	R	T	0.997	95.1	25	18.9	95.1	0	1	0	0	2	2768.07	7087.31	2358140	417	440
Mudpit_Aged L3_4 Posterior NP IAF	Adipocyte enhancer-binding protein 1 OS=Homo sapiens GN=AEBP1 PE=1 SV=1	Q8IUX7	AEBP1	130931	18	25	62	LVSYPYDMAR	R	T	0.995	33	25.2	15.1	33	0	2	0	0	2	1230.58	3834.32	12481400	768	777
Mudpit_Aged L3_4 Posterior NP IAF	Adipocyte enhancer-binding protein 1 OS=Homo sapiens GN=AEBP1 PE=1 SV=1	Q8IUX7	AEBP1	130931	18	25	62	NPFVLGANLNGGER	K	L	0.997	37.9	27.3	15.4	37.9	0	1	0	0	2	1457.75	6737.56	13547900	754	767
Mudpit_Aged L3_4 Posterior NP IAF	Adipocyte enhancer-binding protein 1 OS=Homo sapiens GN=AEBP1 PE=1 SV=1	Q8IUX7	AEBP1	130931	18	25	62	TPTQEQLLAAAMAAAR	R	G	0.997	109	27.8	20.7	108	0	2	1	0	2	1642.86	9030.46	75795000	778	793
Mudpit_Aged L3_4 Posterior NP IAF	Adipocyte enhancer-binding protein 1 OS=Homo sapiens GN=AEBP1 PE=1 SV=1	Q8IUX7	AEBP1	130931	18	25	62	VPNNNLPIPER	R	Y	0.997	75.3	26	17.7	75.3	0	4	0	0	2	1262.69	4411.38	49659700	722	732
Mudpit_Aged L3_4 Posterior NP IAF	Adipocyte enhancer-binding protein 1 OS=Homo sapiens GN=AEBP1 PE=1 SV=1	Q8IUX7	AEBP1	130931	18	25	62	YLSPDATVSTEVR	R	A	0.997	87	29.9	18.4	87	0	3	0	0	2	1437.72	4612.13	29215900	733	745
Mudpit_Aged L3_4 Posterior NP IAF	Adipocyte enhancer-binding protein 1 OS=Homo sapiens GN=AEBP1 PE=1 SV=1	Q8IUX7	AEBP1	130931	18	25	62	YTAGIHGNEVLGR	R	E	0.997	72.3	26.3	23.3	66.5	0	2	1	0	2	1386.71	3763.25	36750100	620	632
Mudpit_Aged L3_4 Posterior NP IAF	Lumican OS=Homo sapiens GN=LUM PE=1 SV=2	P51884	LUM	38431.5	10	16	153	EDAVSAAFK	K	G	0.997	73.8	26.5	17.6	73.8	0	11	0	0	2	937.462	3459.96	1448120000	173	181
Mudpit_Aged L3_4 Posterior NP IAF	Lumican OS=Homo sapiens GN=LUM PE=1 SV=2	P51884	LUM	38431.5	10	16	153	FNALQYLR	R	L	0.99	45.4	25	21.7	39.5	0	11	0	0	2	1024.56	7806.1	926124000	228	235
Mudpit_Aged L3_4 Posterior NP IAF	Lumican OS=Homo sapiens GN=LUM PE=1 SV=2	P51884	LUM	38431.5	10	16	153	ILGPLSYSK	K	I	0.997	55.1	25.5	33.9	37.6	0	8	0	0	2	977.567	5174.74	170782000	297	305
Mudpit_Aged L3_4 Posterior NP IAF	Lumican OS=Homo sapiens GN=LUM PE=1 SV=2	P51884	LUM	38431.5	10	16	153	ISNIPDEYFK	K	R	0.997	67.8	25	17.2	67.8	0	20	0	0	2	1225.61	6022.55	2861830000	217	226
Mudpit_Aged L3_4 Posterior NP IAF	Lumican OS=Homo sapiens GN=LUM PE=1 SV=2	P51884	LUM	38431.5	10	16	153	LKEDAVSAAFK	R	G	0.997	80.7	26.3	27.4	71.3	0	9	13	0	2	1178.64	4443.65	217361000	171	181
Mudpit_Aged L3_4 Posterior NP IAF	Lumican OS=Homo sapiens GN=LUM PE=1 SV=2	P51884	LUM	38431.5	10	16	153	LPSGLPVSLLTLYLDNNK	R	I	0.997	121	25	20.6	121	0	3	1	0	2	1957.1	9438.73	38966000	199	216
Mudpit_Aged L3_4 Posterior NP IAF	Lumican OS=Homo sapiens GN=LUM PE=1 SV=2	P51884	LUM	38431.5	10	16	153	NIPTVNENLENYYLEVNQLEK	K	F	0.997	95.1	26	18.9	95.1	0	5	3	0	2	2536.26	9079.8	288375000	268	288
Mudpit_Aged L3_4 Posterior NP IAF	Lumican OS=Homo sapiens GN=LUM PE=1 SV=2	P51884	LUM	38431.5	10	16	153	SLEDLQLTHNK	K	I	0.997	94	25.5	18.9	94	0	8	12	0	2	1297.67	4373.99	770277000	138	148
Mudpit_Aged L3_4 Posterior NP IAF	Lumican OS=Homo sapiens GN=LUM PE=1 SV=2	P51884	LUM	38431.5	10	16	153	SLEYLDLSFNQIAR	K	L	0.997	80.1	26.4	18	80.1	0	26	2	0	2	1668.86	9984.79	1324920000	185	198
Mudpit_Aged L3_4 Posterior NP IAF	Lumican OS=Homo sapiens GN=LUM PE=1 SV=2	P51884	LUM	38431.5	10	16	153	SVPMVPPGIK	K	Y	0.997	36	25	15.2	36	0	21	0	0	2	1040.58	4669.65	657653000	60	69
Mudpit_Aged L3_4 Posterior NP IAF	Sushi repeat-containing protein SRPX2 OS=Homo sapiens GN=SRPX2 PE=1 SV=1	O60687	SRPX2	52972.3	6	10	15	EQQLSANIIEELR	R	Q	0.997	82.5	27.6	18.2	82.5	0	3	1	0	2	1542.81	8096.07	35631200	394	406
Mudpit_Aged L3_4 Posterior NP IAF	Sushi repeat-containing protein SRPX2 OS=Homo sapiens GN=SRPX2 PE=1 SV=1	O60687	SRPX2	52972.3	6	10	15	GPEPGSHFPEGEHVIR	R	Y	0.997	47.7	25	16	47.7	0	1	1	2	2	1744.84	6247.23	50395500	225	240
Mudpit_Aged L3_4 Posterior NP IAF	Sushi repeat-containing protein SRPX2 OS=Homo sapiens GN=SRPX2 PE=1 SV=1	O60687	SRPX2	52972.3	6	10	15	HVTIIELVGQPPQEVGR	R	I	0.997	72.9	25	17.6	72.9	0	1	1	0	2	1872.03	9116.58	32435000	375	391
Mudpit_Aged L3_4 Posterior NP IAF	Sushi repeat-containing protein SRPX2 OS=Homo sapiens GN=SRPX2 PE=1 SV=1	O60687	SRPX2	52972.3	6	10	15	INVNVNSAAGLLDQFYEK	K	Q	0.997	80.7	27.1	18	80.7	0	1	0	0	2	1995.02	9181.23	13367900	324	341
Mudpit_Aged L3_4 Posterior NP IAF	Sushi repeat-containing protein SRPX2 OS=Homo sapiens GN=SRPX2 PE=1 SV=1	O60687	SRPX2	52972.3	6	10	15	LLIISAPDPSNR	R	Y	0.997	46.7	25	15.9	46.7	0	1	0	0	2	1295.73	6175.27	12714100	344	355
Mudpit_Aged L3_4 Posterior NP IAF	Sushi repeat-containing protein SRPX2 OS=Homo sapiens GN=SRPX2 PE=1 SV=1	O60687	SRPX2	52972.3	6	10	15	SYFNMVLIDK	R	Q	0.997	36.7	26.5	15.3	36.7	0	3	0	0	2	1229.62	8557.99	14677900	414	423
Mudpit_Aged L3_4 Posterior NP IAF	Angiopoietin-like 2, isoform CRA_a OS=Homo sapiens GN=ANGPTL2 PE=4 SV=1	A0A024R868,Q9UKU9	ANGPTL2	57104.9	12	13	28	DNALELSQLENR	R	I	0.997	87.6	34.9	22.9	83.1	0	1	0	0	2	1401.7	6056.49	7503440	150	161
Mudpit_Aged L3_4 Posterior NP IAF	Angiopoietin-like 2, isoform CRA_a OS=Homo sapiens GN=ANGPTL2 PE=4 SV=1	A0A024R868,Q9UKU9	ANGPTL2	57104.9	12	13	28	EPEVLLENR	K	V	0.997	46.2	25.8	15.9	46.2	0	1	0	0	2	1098.58	4602.58	7226360	75	83
Mudpit_Aged L3_4 Posterior NP IAF	Angiopoietin-like 2, isoform CRA_a OS=Homo sapiens GN=ANGPTL2 PE=4 SV=1	A0A024R868,Q9UKU9	ANGPTL2	57104.9	12	13	28	HDPGGWTVIQR	R	R	0.997	47.7	26.5	18.7	45	0	1	0	0	2	1265.64	6378.44	7889080	311	321
Mudpit_Aged L3_4 Posterior NP IAF	Angiopoietin-like 2, isoform CRA_a OS=Homo sapiens GN=ANGPTL2 PE=4 SV=1	A0A024R868,Q9UKU9	ANGPTL2	57104.9	12	13	28	IINQISTNEIQSDQNLK	R	V	0.997	82.5	26.2	18.2	82.5	0	1	0	0	2	1958.02	5094.9	4759650	233	249
Mudpit_Aged L3_4 Posterior NP IAF	Angiopoietin-like 2, isoform CRA_a OS=Homo sapiens GN=ANGPTL2 PE=4 SV=1	A0A024R868,Q9UKU9	ANGPTL2	57104.9	12	13	28	LDGSVNFFR	R	N	0.997	64.6	25.6	17	64.6	0	3	0	0	2	1054.53	6799.54	20125700	323	331
Mudpit_Aged L3_4 Posterior NP IAF	Angiopoietin-like 2, isoform CRA_a OS=Homo sapiens GN=ANGPTL2 PE=4 SV=1	A0A024R868,Q9UKU9	ANGPTL2	57104.9	12	13	28	LEPESEYYK	R	L	0.997	50.7	25	16.2	50.7	0	3	0	0	2	1157.54	3484.35	27122400	386	394
Mudpit_Aged L3_4 Posterior NP IAF	Angiopoietin-like 2, isoform CRA_a OS=Homo sapiens GN=ANGPTL2 PE=4 SV=1	A0A024R868,Q9UKU9	ANGPTL2	57104.9	12	13	28	LLVTMEDWSGR	K	K	0.997	60	27.2	16.7	60	0	6	0	0	2	1306.65	7396.96	83953000	365	375
Mudpit_Aged L3_4 Posterior NP IAF	Angiopoietin-like 2, isoform CRA_a OS=Homo sapiens GN=ANGPTL2 PE=4 SV=1	A0A024R868,Q9UKU9	ANGPTL2	57104.9	12	13	28	QIETLQQLVEVDGGIVSEVK	R	L	0.997	99.7	25.7	19.2	99.7	0	1	0	0	2	2184.18	9035.03	4445580	102	121
Mudpit_Aged L3_4 Posterior NP IAF	Angiopoietin-like 2, isoform CRA_a OS=Homo sapiens GN=ANGPTL2 PE=4 SV=1	A0A024R868,Q9UKU9	ANGPTL2	57104.9	12	13	28	RDNALELSQLENR	K	I	0.96	34.7	27.6	15.2	34.7	0	0	1	0	2	1557.8	6538.56	9851060	149	161
Mudpit_Aged L3_4 Posterior NP IAF	Angiopoietin-like 2, isoform CRA_a OS=Homo sapiens GN=ANGPTL2 PE=4 SV=1	A0A024R868,Q9UKU9	ANGPTL2	57104.9	12	13	28	VFAEYASFR	K	L	0.997	46.7	25.6	16.4	46.2	0	6	0	0	2	1089.54	6037.01	65326100	377	385
Mudpit_Aged L3_4 Posterior NP IAF	Angiopoietin-like 2, isoform CRA_a OS=Homo sapiens GN=ANGPTL2 PE=4 SV=1	A0A024R868,Q9UKU9	ANGPTL2	57104.9	12	13	28	VYQPPTYNR	R	I	0.982	30.8	26.3	14.9	30.8	0	1	0	0	2	1137.57	2699.1	5727540	224	232
Mudpit_Aged L3_4 Posterior NP IAF	Angiopoietin-like 2, isoform CRA_a OS=Homo sapiens GN=ANGPTL2 PE=4 SV=1	A0A024R868,Q9UKU9	ANGPTL2	57104.9	12	13	28	YQDGVYWAEFR	R	G	0.988	34.8	28.4	15.2	34.8	0	3	0	0	2	1433.65	7316.39	56461000	462	472
Mudpit_Aged L3_4 Posterior NP IAF	Complement factor H OS=Homo sapiens GN=CFH PE=1 SV=4	P08603	CFH	139096	15	23	67	AQTTVTCMENGWSPTPR	K	C	0.997	68.2	25	17.3	68.2	0	12	0	0	2	1936.85	5610.14	58770300	425	441
Mudpit_Aged L3_4 Posterior NP IAF	Complement factor H OS=Homo sapiens GN=CFH PE=1 SV=4	P08603	CFH	139096	15	23	67	AVYTCNEGYQLLGEINYR	K	E	0.997	114	25	20.1	114	0	1	0	0	2	2164	8288.7	15928000	110	127
Mudpit_Aged L3_4 Posterior NP IAF	Complement factor H OS=Homo sapiens GN=CFH PE=1 SV=4	P08603	CFH	139096	15	23	67	EGWIHTVCINGR	K	W	0.997	37.5	25.5	15.3	37.5	0	2	0	0	2	1442.68	6011.6	143968000	785	796
Mudpit_Aged L3_4 Posterior NP IAF	Complement factor H OS=Homo sapiens GN=CFH PE=1 SV=4	P08603	CFH	139096	15	23	67	EIMENYNIALR	R	W	0.997	69.3	27.8	22.6	64.1	0	5	0	0	2	1365.68	6196.93	133823000	1172	1182
Mudpit_Aged L3_4 Posterior NP IAF	Complement factor H OS=Homo sapiens GN=CFH PE=1 SV=4	P08603	CFH	139096	15	23	67	EQVQSCGPPPELLNGNVK	K	E	0.997	84.5	26.7	18.3	84.5	0	1	0	0	2	1966.95	5418.2	18704000	625	642
Mudpit_Aged L3_4 Posterior NP IAF	Complement factor H OS=Homo sapiens GN=CFH PE=1 SV=4	P08603	CFH	139096	15	23	67	GEWVALNPLR	K	K	0.997	39.7	25	15.5	39.7	0	4	0	0	2	1154.63	7917.38	177115000	69	78
Mudpit_Aged L3_4 Posterior NP IAF	Complement factor H OS=Homo sapiens GN=CFH PE=1 SV=4	P08603	CFH	139096	15	23	67	HGGLYHENMR	K	R	0.98	40.4	25	17.4	38.5	0	0	1	0	2	1213.55	4115.47	8641990	332	341
Mudpit_Aged L3_4 Posterior NP IAF	Complement factor H OS=Homo sapiens GN=CFH PE=1 SV=4	P08603	CFH	139096	15	23	67	IDVHLVPDR	K	K	0.997	57.4	25.4	16.6	57.4	0	1	4	0	2	1063.59	5276.54	51730100	574	582
Mudpit_Aged L3_4 Posterior NP IAF	Complement factor H OS=Homo sapiens GN=CFH PE=1 SV=4	P08603	CFH	139096	15	23	67	IDVHLVPDRK	K	K	0.947	34.9	25	15.2	34.9	0	0	1	0	2	1191.68	4785.97	27464300	574	583
Mudpit_Aged L3_4 Posterior NP IAF	Complement factor H OS=Homo sapiens GN=CFH PE=1 SV=4	P08603	CFH	139096	15	23	67	IVSSAMEPDR	K	E	0.997	57.2	25.8	17.6	56.2	0	9	0	0	2	1120.53	1666.52	24822600	157	166
Mudpit_Aged L3_4 Posterior NP IAF	Complement factor H OS=Homo sapiens GN=CFH PE=1 SV=4	P08603	CFH	139096	15	23	67	IVSSAMEPDREYHFGQAVR	K	F	0.965	32.7	25.5	15	32.7	0	0	1	0	2	2208.05	5318.52	37689700	157	175
Mudpit_Aged L3_4 Posterior NP IAF	Complement factor H OS=Homo sapiens GN=CFH PE=1 SV=4	P08603	CFH	139096	15	23	67	NTEILTGSWSDQTYPEGTQAIYK	R	C	0.997	112	25	20	112	0	6	4	0	2	2602.23	7966.64	209378000	29	51
Mudpit_Aged L3_4 Posterior NP IAF	Complement factor H OS=Homo sapiens GN=CFH PE=1 SV=4	P08603	CFH	139096	15	23	67	SPDVINGSPISQK	K	I	0.997	57.2	26.2	16.6	57.2	0	2	0	0	2	1341.7	4068.26	19662900	212	224
Mudpit_Aged L3_4 Posterior NP IAF	Complement factor H OS=Homo sapiens GN=CFH PE=1 SV=4	P08603	CFH	139096	15	23	67	SPPEISHGVVAHMSDSYQYGEEVTYK	K	C	0.997	80	25	18	80	0	0	2	1	2	2926.32	7451.42	29757900	933	958
Mudpit_Aged L3_4 Posterior NP IAF	Complement factor H OS=Homo sapiens GN=CFH PE=1 SV=4	P08603	CFH	139096	15	23	67	SSNLIILEEHLK	K	N	0.997	51.1	25.2	16.2	51.1	0	4	6	0	2	1395.78	7461.08	273586000	755	766
Mudpit_Aged L3_4 Posterior NP IAF	Collagen, type V, alpha 1, isoform CRA_a OS=Homo sapiens GN=COL5A1 PE=4 SV=1	A0A024R8E5,B2ZZ86,P20908	COL5A1	183563	2	3	3	FLGSNDEEMSYDNNPYIR	R	A	0.997	116	25	20.3	116	0	2	0	0	2	2179.92	6777.19	5354290	1766	1783
Mudpit_Aged L3_4 Posterior NP IAF	Collagen, type V, alpha 1, isoform CRA_a OS=Homo sapiens GN=COL5A1 PE=4 SV=1	A0A024R8E5,B2ZZ86,P20908	COL5A1	183563	2	3	3	TVLEIDTPK	K	V	0.997	46.7	27.4	18.9	43.7	0	1	0	0	2	1015.57	4725.15	5775030	1798	1806
Mudpit_Aged L3_4 Posterior NP IAF	cDNA FLJ14168 fis, clone NT2RP2001440, highly similar to 14-3-3 protein gamma OS=Homo sapiens PE=2 SV=1	B3KNB4,B4DHC4,P61981	YWHAG	28303.1	2	2	2	NVTELNEPLSNEER	K	N	0.997	77.9	25	18.1	77.7	0	1	0	0	2	1643.79	4925	2973800	29	42
Mudpit_Aged L3_4 Posterior NP IAF	cDNA FLJ14168 fis, clone NT2RP2001440, highly similar to 14-3-3 protein gamma OS=Homo sapiens PE=2 SV=1	B3KNB4,B4DHC4,P61981	YWHAG	28303.1	2	2	2	YLAEVATGEK	R	R	0.997	48.5	27.2	22.4	42.1	0	1	0	0	2	1080.56	2965.74	6440830	133	142
Mudpit_Aged L3_4 Posterior NP IAF	HHIP-like protein 1 OS=Homo sapiens GN=HHIPL1 PE=2 SV=1	F1T0G3,Q96JK4	HHIPL1	86731.7	4	4	6	AEFGQGGSLPILLDDVR	R	C	0.997	111	26.6	20	111	0	2	0	0	2	1786.93	9071.3	12463700	728	744
Mudpit_Aged L3_4 Posterior NP IAF	HHIP-like protein 1 OS=Homo sapiens GN=HHIPL1 PE=2 SV=1	F1T0G3,Q96JK4	HHIPL1	86731.7	4	4	6	QLGFAYAVR	R	A	0.967	25.2	25	14.6	25.2	0	1	0	0	2	1024.56	6321.46	4123100	715	723
Mudpit_Aged L3_4 Posterior NP IAF	HHIP-like protein 1 OS=Homo sapiens GN=HHIPL1 PE=2 SV=1	F1T0G3,Q96JK4	HHIPL1	86731.7	4	4	6	VSEDDENAVDHSSER	R	I	0.99	45.6	25	15.8	45.6	0	0	1	0	2	1688.7	1900.65	4540440	287	301
Mudpit_Aged L3_4 Posterior NP IAF	HHIP-like protein 1 OS=Homo sapiens GN=HHIPL1 PE=2 SV=1	F1T0G3,Q96JK4	HHIPL1	86731.7	4	4	6	VVLTSPWEGDER	R	G	0.997	79.3	26.6	18	79.3	0	2	0	0	2	1387.69	5851.48	14822300	238	249
Mudpit_Aged L3_4 Posterior NP IAF	cDNA FLJ77835, highly similar to Homo sapiens complement component 1, s subcomponent (C1S), transcript variant 2, mRNA OS=Homo sapiens PE=2 SV=1	A8K2N0,P09871	C1S	76684.2	11	15	36	EDTPNSVWEPAK	K	A	0.997	67.9	25	17.2	67.9	0	1	0	0	2	1372.64	4408.57	15767500	297	308
Mudpit_Aged L3_4 Posterior NP IAF	cDNA FLJ77835, highly similar to Homo sapiens complement component 1, s subcomponent (C1S), transcript variant 2, mRNA OS=Homo sapiens PE=2 SV=1	A8K2N0,P09871	C1S	76684.2	11	15	36	EPTMYVGSTSVQTSR	R	L	0.997	52.7	25	16.3	52.7	0	3	0	0	2	1642.77	4071.39	12741200	482	496
Mudpit_Aged L3_4 Posterior NP IAF	cDNA FLJ77835, highly similar to Homo sapiens complement component 1, s subcomponent (C1S), transcript variant 2, mRNA OS=Homo sapiens PE=2 SV=1	A8K2N0,P09871	C1S	76684.2	11	15	36	GDSGGAFAVQDPNDK	K	T	0.997	103	25	19.5	103	0	5	0	0	2	1477.66	3183.07	18991600	630	644
Mudpit_Aged L3_4 Posterior NP IAF	cDNA FLJ77835, highly similar to Homo sapiens complement component 1, s subcomponent (C1S), transcript variant 2, mRNA OS=Homo sapiens PE=2 SV=1	A8K2N0,P09871	C1S	76684.2	11	15	36	IIGGSDADIK	R	N	0.997	59.5	28.1	28.8	47.5	0	2	0	0	2	988.531	2579.68	93893900	438	447
Mudpit_Aged L3_4 Posterior NP IAF	cDNA FLJ77835, highly similar to Homo sapiens complement component 1, s subcomponent (C1S), transcript variant 2, mRNA OS=Homo sapiens PE=2 SV=1	A8K2N0,P09871	C1S	76684.2	11	15	36	LLEVPEGR	K	T	0.982	31.2	25.4	21.4	24.8	0	3	0	0	2	912.515	3860.17	45757200	516	523
Mudpit_Aged L3_4 Posterior NP IAF	cDNA FLJ77835, highly similar to Homo sapiens complement component 1, s subcomponent (C1S), transcript variant 2, mRNA OS=Homo sapiens PE=2 SV=1	A8K2N0,P09871	C1S	76684.2	11	15	36	NYVDWIMK	K	T	0.99	40.7	25.5	15.5	40.7	0	2	0	0	2	1068.52	7415.47	12303700	670	677
Mudpit_Aged L3_4 Posterior NP IAF	cDNA FLJ77835, highly similar to Homo sapiens complement component 1, s subcomponent (C1S), transcript variant 2, mRNA OS=Homo sapiens PE=2 SV=1	A8K2N0,P09871	C1S	76684.2	11	15	36	SNALDIIFQTDLTGQK	K	K	0.997	104	27.2	20.5	103	0	1	0	0	2	1763.92	9181.87	27850500	265	280
Mudpit_Aged L3_4 Posterior NP IAF	cDNA FLJ77835, highly similar to Homo sapiens complement component 1, s subcomponent (C1S), transcript variant 2, mRNA OS=Homo sapiens PE=2 SV=1	A8K2N0,P09871	C1S	76684.2	11	15	36	SSNNPHSPIVEEFQVPYNK	R	L	0.997	46.5	26.6	15.9	46.5	0	2	1	0	2	2186.05	6703.51	30752000	87	105
Mudpit_Aged L3_4 Posterior NP IAF	cDNA FLJ77835, highly similar to Homo sapiens complement component 1, s subcomponent (C1S), transcript variant 2, mRNA OS=Homo sapiens PE=2 SV=1	A8K2N0,P09871	C1S	76684.2	11	15	36	TNFDNDIALVR	R	L	0.997	76.5	27.8	17.8	76.5	0	4	0	0	2	1277.65	6474.21	40482600	524	534
Mudpit_Aged L3_4 Posterior NP IAF	cDNA FLJ77835, highly similar to Homo sapiens complement component 1, s subcomponent (C1S), transcript variant 2, mRNA OS=Homo sapiens PE=2 SV=1	A8K2N0,P09871	C1S	76684.2	11	15	36	VEDPESTLFGSVIR	K	Y	0.997	91	27.2	18.7	91	0	5	1	0	2	1548.79	8429.12	34641200	370	383
Mudpit_Aged L3_4 Posterior NP IAF	cDNA FLJ77835, highly similar to Homo sapiens complement component 1, s subcomponent (C1S), transcript variant 2, mRNA OS=Homo sapiens PE=2 SV=1	A8K2N0,P09871	C1S	76684.2	11	15	36	VGATSFYSTCQSNGK	R	W	0.997	66.7	31.1	17.2	66.7	0	6	0	0	2	1607.7	3668.62	18605000	332	346
Mudpit_Aged L3_4 Posterior NP IAF	Chondroitin sulfate proteoglycan 2 (Versican), isoform CRA_b OS=Homo sapiens GN=CSPG2 PE=4 SV=1	A0A024RAQ9,P13611,Q59FG9	CSPG2,VCAN	372813	12	16	52	CDVMYGIEDTQDTVSLTVDGVVFHYR	R	A	0.997	70.6	28.8	17.4	70.6	0	0	3	0	2	3020.37	9713.47	2488320	130	155
Mudpit_Aged L3_4 Posterior NP IAF	Chondroitin sulfate proteoglycan 2 (Versican), isoform CRA_b OS=Homo sapiens GN=CSPG2 PE=4 SV=1	A0A024RAQ9,P13611,Q59FG9	CSPG2,VCAN	372813	12	16	52	FTFEEAAK	K	E	0.99	34	25	15.1	34	0	3	0	0	2	942.457	4030.33	51475100	261	268
Mudpit_Aged L3_4 Posterior NP IAF	Chondroitin sulfate proteoglycan 2 (Versican), isoform CRA_b OS=Homo sapiens GN=CSPG2 PE=4 SV=1	A0A024RAQ9,P13611,Q59FG9	CSPG2,VCAN	372813	12	16	52	LATVGELQAAWR	R	N	0.997	83.9	26.8	18.2	83.9	0	8	1	0	2	1314.72	7470.98	101877000	277	288
Mudpit_Aged L3_4 Posterior NP IAF	Chondroitin sulfate proteoglycan 2 (Versican), isoform CRA_b OS=Homo sapiens GN=CSPG2 PE=4 SV=1	A0A024RAQ9,P13611,Q59FG9	CSPG2,VCAN	372813	12	16	52	LGEPNYGAEIR	R	G	0.997	55.3	26.2	16.5	55.3	0	1	0	0	2	1218.61	4164.15	7131900	1912	1922
Mudpit_Aged L3_4 Posterior NP IAF	Chondroitin sulfate proteoglycan 2 (Versican), isoform CRA_b OS=Homo sapiens GN=CSPG2 PE=4 SV=1	A0A024RAQ9,P13611,Q59FG9	CSPG2,VCAN	372813	12	16	52	LLASDAGLYR	K	C	0.997	71.7	26.6	18.8	70.4	0	6	0	0	2	1078.59	4840.56	102207000	120	129
Mudpit_Aged L3_4 Posterior NP IAF	Chondroitin sulfate proteoglycan 2 (Versican), isoform CRA_b OS=Homo sapiens GN=CSPG2 PE=4 SV=1	A0A024RAQ9,P13611,Q59FG9	CSPG2,VCAN	372813	12	16	52	LQGAHLTSILSHEEQMFVNR	R	V	0.954	34.2	28.9	15.1	34.2	0	0	1	0	2	2326.16	9608.49	4102300	3199	3218
Mudpit_Aged L3_4 Posterior NP IAF	Chondroitin sulfate proteoglycan 2 (Versican), isoform CRA_b OS=Homo sapiens GN=CSPG2 PE=4 SV=1	A0A024RAQ9,P13611,Q59FG9	CSPG2,VCAN	372813	12	16	52	NGFDQCDYGWLSDASVR	R	H	0.997	103	25	19.4	103	0	7	2	0	2	1990.82	8652.16	69527800	289	305
Mudpit_Aged L3_4 Posterior NP IAF	Chondroitin sulfate proteoglycan 2 (Versican), isoform CRA_b OS=Homo sapiens GN=CSPG2 PE=4 SV=1	A0A024RAQ9,P13611,Q59FG9	CSPG2,VCAN	372813	12	16	52	QEIESETTSEEQIQEEK	R	S	0.997	116	25	20.3	116	0	1	0	0	2	2036.91	3570.96	1428860	2108	2124
Mudpit_Aged L3_4 Posterior NP IAF	Chondroitin sulfate proteoglycan 2 (Versican), isoform CRA_b OS=Homo sapiens GN=CSPG2 PE=4 SV=1	A0A024RAQ9,P13611,Q59FG9	CSPG2,VCAN	372813	12	16	52	VGHDYQWIGLNDK	R	M	0.997	98.2	26.2	19.1	98.2	0	1	1	0	2	1544.75	6020.8	60992500	3219	3231
Mudpit_Aged L3_4 Posterior NP IAF	Chondroitin sulfate proteoglycan 2 (Versican), isoform CRA_b OS=Homo sapiens GN=CSPG2 PE=4 SV=1	A0A024RAQ9,P13611,Q59FG9	CSPG2,VCAN	372813	12	16	52	VSVPTHPEAVGDASLTVVK	R	L	0.997	85.8	26.4	18.4	85.8	0	4	6	0	2	1906.03	6776.75	128705000	101	119
Mudpit_Aged L3_4 Posterior NP IAF	Chondroitin sulfate proteoglycan 2 (Versican), isoform CRA_b OS=Homo sapiens GN=CSPG2 PE=4 SV=1	A0A024RAQ9,P13611,Q59FG9	CSPG2,VCAN	372813	12	16	52	YEINSLIR	R	Y	0.989	31.5	27.1	23.3	23.1	0	1	0	0	2	1007.55	5637.84	22790100	3315	3322
Mudpit_Aged L3_4 Posterior NP IAF	Chondroitin sulfate proteoglycan 2 (Versican), isoform CRA_b OS=Homo sapiens GN=CSPG2 PE=4 SV=1	A0A024RAQ9,P13611,Q59FG9	CSPG2,VCAN	372813	12	16	52	YTLNFEAAQK	R	A	0.997	62.9	25.3	24.8	55	0	6	0	0	2	1184.59	5209.87	70538400	161	170
Mudpit_Aged L3_4 Posterior NP IAF	cDNA FLJ50077, highly similar to Chordin OS=Homo sapiens PE=2 SV=1	B7Z1H7,E7ESX1,Q9H2X0	CHRD	102030	2	2	2	DLEPELLR	K	H	0.99	40.6	25	15.5	40.6	0	1	0	0	2	984.536	6187.29	6065880	613	620
Mudpit_Aged L3_4 Posterior NP IAF	cDNA FLJ50077, highly similar to Chordin OS=Homo sapiens PE=2 SV=1	B7Z1H7,E7ESX1,Q9H2X0	CHRD	102030	2	2	2	SGGLTQVPLR	R	L	0.997	41.3	25	15.6	41.3	0	1	0	0	2	1027.59	3968.48	14623800	326	335
Mudpit_Aged L3_4 Posterior NP IAF	Heparin cofactor 2 OS=Homo sapiens GN=SERPIND1 PE=1 SV=3	P05546	SERPIND1	57072.9	11	12	31	EYYFAEAQIADFSDPAFISK	R	T	0.997	98.3	25	19.1	98.3	0	4	0	0	2	2312.08	9140.55	40338200	242	261
Mudpit_Aged L3_4 Posterior NP IAF	Heparin cofactor 2 OS=Homo sapiens GN=SERPIND1 PE=1 SV=3	P05546	SERPIND1	57072.9	11	12	31	FPVEMTHNHNFR	K	L	0.951	31.8	25	15	31.8	0	0	1	0	2	1528.71	8657.43	7096260	303	314
Mudpit_Aged L3_4 Posterior NP IAF	Heparin cofactor 2 OS=Homo sapiens GN=SERPIND1 PE=1 SV=3	P05546	SERPIND1	57072.9	11	12	31	GETHEQVHSILHFK	K	D	0.997	58.2	26.2	16.6	58.2	0	1	0	0	2	1661.84	7850.25	4952990	171	184
Mudpit_Aged L3_4 Posterior NP IAF	Heparin cofactor 2 OS=Homo sapiens GN=SERPIND1 PE=1 SV=3	P05546	SERPIND1	57072.9	11	12	31	GGETAQSADPQWEQLNNK	K	N	0.997	104	25	19.5	104	0	2	0	0	2	1972.9	4428.16	10023200	31	48
Mudpit_Aged L3_4 Posterior NP IAF	Heparin cofactor 2 OS=Homo sapiens GN=SERPIND1 PE=1 SV=3	P05546	SERPIND1	57072.9	11	12	31	GPLDQLEK	K	G	0.99	48.1	25	29.7	34.4	0	3	0	0	2	899.484	4256.91	51944700	23	30
Mudpit_Aged L3_4 Posterior NP IAF	Heparin cofactor 2 OS=Homo sapiens GN=SERPIND1 PE=1 SV=3	P05546	SERPIND1	57072.9	11	12	31	HQGTITVNEEGTQATTVTTVGFMPLSTQVR	K	F	0.997	84.8	25	18.3	84.8	0	0	1	0	2	3219.6	8809.8	3157300	439	468
Mudpit_Aged L3_4 Posterior NP IAF	Heparin cofactor 2 OS=Homo sapiens GN=SERPIND1 PE=1 SV=3	P05546	SERPIND1	57072.9	11	12	31	NYNLVESLK	K	L	0.997	40.4	27	20	35.9	0	3	0	0	2	1079.57	6151.81	22908700	402	410
Mudpit_Aged L3_4 Posterior NP IAF	Heparin cofactor 2 OS=Homo sapiens GN=SERPIND1 PE=1 SV=3	P05546	SERPIND1	57072.9	11	12	31	QFPILLDFK	K	T	0.997	42.7	25.3	15.7	42.7	0	4	0	0	2	1120.64	9152.6	184485000	229	237
Mudpit_Aged L3_4 Posterior NP IAF	Heparin cofactor 2 OS=Homo sapiens GN=SERPIND1 PE=1 SV=3	P05546	SERPIND1	57072.9	11	12	31	SVNDLYIQK	R	Q	0.997	47.2	27	16	47.2	0	3	0	0	2	1079.57	3646.28	88122300	220	228
Mudpit_Aged L3_4 Posterior NP IAF	Heparin cofactor 2 OS=Homo sapiens GN=SERPIND1 PE=1 SV=3	P05546	SERPIND1	57072.9	11	12	31	TLEAQLTPR	K	V	0.997	59	26.9	17.8	57.9	0	5	0	0	2	1028.57	3848.6	76785400	368	376
Mudpit_Aged L3_4 Posterior NP IAF	Heparin cofactor 2 OS=Homo sapiens GN=SERPIND1 PE=1 SV=3	P05546	SERPIND1	57072.9	11	12	31	YEITTIHNLFR	K	K	0.997	53.9	27.6	16.4	53.9	0	2	2	0	2	1406.74	9093.51	89599900	193	203
Mudpit_Aged L3_4 Posterior NP IAF	Thyroxine-binding globulin OS=Homo sapiens GN=SERPINA7 PE=1 SV=2	P05543	SERPINA7	46325.6	4	4	5	AQWANPFDPSK	K	T	0.995	39.5	25	15.5	39.5	0	1	0	0	2	1260.6	6770	5379630	208	218
Mudpit_Aged L3_4 Posterior NP IAF	Thyroxine-binding globulin OS=Homo sapiens GN=SERPINA7 PE=1 SV=2	P05543	SERPINA7	46325.6	4	4	5	EGQMESVEAAMSSK	K	T	0.997	98	25	19.1	98	0	1	0	0	2	1483.64	4997.15	17988900	274	287
Mudpit_Aged L3_4 Posterior NP IAF	Thyroxine-binding globulin OS=Homo sapiens GN=SERPINA7 PE=1 SV=2	P05543	SERPINA7	46325.6	4	4	5	FTVETPDK	R	N	0.99	34.1	26.4	15.1	34.1	0	2	0	0	2	936.467	2853.38	15233900	57	64
Mudpit_Aged L3_4 Posterior NP IAF	Thyroxine-binding globulin OS=Homo sapiens GN=SERPINA7 PE=1 SV=2	P05543	SERPINA7	46325.6	4	4	5	NALALFVLPK	K	E	0.997	46.3	25.1	15.9	46.3	0	1	0	0	2	1085.67	8888.92	10866800	264	273
Mudpit_Aged L3_4 Posterior NP IAF	Reticulocalbin-3 OS=Homo sapiens GN=RCN3 PE=1 SV=1	Q96D15	RCN3	37492.9	3	3	3	AGDGDGWVSLAELR	R	A	0.997	72.7	25.5	17.5	72.7	0	1	0	0	2	1445.7	8006.91	8101760	90	103
Mudpit_Aged L3_4 Posterior NP IAF	Reticulocalbin-3 OS=Homo sapiens GN=RCN3 PE=1 SV=1	Q96D15	RCN3	37492.9	3	3	3	DIVIAETLEDLDR	R	N	0.997	50.9	27.8	16.2	50.9	0	1	0	0	2	1501.77	9107.1	4505640	202	214
Mudpit_Aged L3_4 Posterior NP IAF	Reticulocalbin-3 OS=Homo sapiens GN=RCN3 PE=1 SV=1	Q96D15	RCN3	37492.9	3	3	3	EFDQLTPEESQAR	K	L	0.997	38.5	27.1	15.4	38.5	0	1	0	0	2	1549.71	4610.07	1986040	67	79
Mudpit_Aged L3_4 Posterior NP IAF	Complement component C8 gamma chain OS=Homo sapiens GN=C8G PE=1 SV=3	P07360	C8G	22277.3	4	8	42	AEATTLHVAPQGTAMAVSTFR	R	K	0.997	87.5	28	18.5	87.5	0	2	10	0	2	2159.09	7578.94	204567000	70	90
Mudpit_Aged L3_4 Posterior NP IAF	Complement component C8 gamma chain OS=Homo sapiens GN=C8G PE=1 SV=3	P07360	C8G	22277.3	4	8	42	QLYGDTGVLGR	R	F	0.997	74.1	27.6	17.6	74.1	0	7	0	0	2	1178.62	5070.33	93153800	101	111
Mudpit_Aged L3_4 Posterior NP IAF	Complement component C8 gamma chain OS=Homo sapiens GN=C8G PE=1 SV=3	P07360	C8G	22277.3	4	8	42	SLPVSDSVLSGFEQR	R	V	0.997	76	27.7	17.7	76	0	10	1	0	2	1620.82	7958.34	122360000	154	168
Mudpit_Aged L3_4 Posterior NP IAF	Complement component C8 gamma chain OS=Homo sapiens GN=C8G PE=1 SV=3	P07360	C8G	22277.3	4	8	42	VQEAHLTEDQIFYFPK	R	Y	0.997	102	26.5	19.4	102	0	4	8	0	2	1964.98	8305.14	273027000	169	184
Mudpit_Aged L3_4 Posterior NP IAF	cDNA, FLJ93141, highly similar to Homo sapiens coagulation factor XIII, A1 polypeptide (F13A1), mRNA OS=Homo sapiens PE=2 SV=1	B2R6V9		83241.2	10	15	28	AVPPNNSNAAEDDLPTVELQGVVPR	R	G	0.997	56.1	26.7	16.5	56.1	0	1	2	0	2	2602.31	8292.7	14495400	14	38
Mudpit_Aged L3_4 Posterior NP IAF	cDNA, FLJ93141, highly similar to Homo sapiens coagulation factor XIII, A1 polypeptide (F13A1), mRNA OS=Homo sapiens PE=2 SV=1	B2R6V9		83241.2	10	15	28	DGTHVVENVDATHIGK	K	L	0.992	51.4	26.1	16.2	51.4	0	0	1	1	2	1691.83	4810.52	19304100	448	463
Mudpit_Aged L3_4 Posterior NP IAF	cDNA, FLJ93141, highly similar to Homo sapiens coagulation factor XIII, A1 polypeptide (F13A1), mRNA OS=Homo sapiens PE=2 SV=1	B2R6V9		83241.2	10	15	28	ETFDVTLEPLSFK	K	K	0.995	40.4	26.9	15.5	40.4	0	1	0	0	2	1525.78	8952.84	26674700	572	584
Mudpit_Aged L3_4 Posterior NP IAF	cDNA, FLJ93141, highly similar to Homo sapiens coagulation factor XIII, A1 polypeptide (F13A1), mRNA OS=Homo sapiens PE=2 SV=1	B2R6V9		83241.2	10	15	28	GTYIPVPIVSELQSGK	K	W	0.992	33.2	26.6	15.1	33.2	0	1	0	0	2	1687.93	9077.52	36690600	115	130
Mudpit_Aged L3_4 Posterior NP IAF	cDNA, FLJ93141, highly similar to Homo sapiens coagulation factor XIII, A1 polypeptide (F13A1), mRNA OS=Homo sapiens PE=2 SV=1	B2R6V9		83241.2	10	15	28	HVYGELDVQIQR	R	R	0.992	58	25.3	25.4	49.2	0	0	1	0	2	1456.75	6224.26	8191120	717	728
Mudpit_Aged L3_4 Posterior NP IAF	cDNA, FLJ93141, highly similar to Homo sapiens coagulation factor XIII, A1 polypeptide (F13A1), mRNA OS=Homo sapiens PE=2 SV=1	B2R6V9		83241.2	10	15	28	LALETALMYGAK	R	K	0.997	71.1	25.7	17.4	71.1	0	3	0	0	2	1280.69	8008.25	13221500	493	504
Mudpit_Aged L3_4 Posterior NP IAF	cDNA, FLJ93141, highly similar to Homo sapiens coagulation factor XIII, A1 polypeptide (F13A1), mRNA OS=Homo sapiens PE=2 SV=1	B2R6V9		83241.2	10	15	28	LIASMSSDSLR	K	H	0.997	60.6	25	16.8	60.6	0	9	0	0	2	1195.6	2743.92	32260600	706	716
Mudpit_Aged L3_4 Posterior NP IAF	cDNA, FLJ93141, highly similar to Homo sapiens coagulation factor XIII, A1 polypeptide (F13A1), mRNA OS=Homo sapiens PE=2 SV=1	B2R6V9		83241.2	10	15	28	QIGGDGMMDITDTYK	K	F	0.997	96.7	25	19	96.7	0	3	0	0	2	1644.72	6593	19850000	469	483
Mudpit_Aged L3_4 Posterior NP IAF	cDNA, FLJ93141, highly similar to Homo sapiens coagulation factor XIII, A1 polypeptide (F13A1), mRNA OS=Homo sapiens PE=2 SV=1	B2R6V9		83241.2	10	15	28	SNVDMDFEVENAVLGK	R	D	0.997	112	25	20	112	0	4	0	0	2	1782.82	7920.39	14896100	517	532
Mudpit_Aged L3_4 Posterior NP IAF	cDNA, FLJ93141, highly similar to Homo sapiens coagulation factor XIII, A1 polypeptide (F13A1), mRNA OS=Homo sapiens PE=2 SV=1	B2R6V9		83241.2	10	15	28	STVLTIPEIIIK	K	V	0.996	34.5	25	15.2	34.5	0	1	0	0	2	1326.82	9144.24	30716200	625	636
Mudpit_Aged L3_4 Posterior NP IAF	Amyloid lambda 6 light chain variable region SAR (Fragment) OS=Homo sapiens PE=2 SV=1	Q96JD0		12294.6	2	2	4	FSGSIDSSSNSASLTISGLK	R	T	0.997	141	26	21.8	141	0	3	0	0	2	1957.97	6931.91	11061000	63	82
Mudpit_Aged L3_4 Posterior NP IAF	Amyloid lambda 6 light chain variable region SAR (Fragment) OS=Homo sapiens PE=2 SV=1	Q96JD0		12294.6	2	2	4	NFMLTQPHSVSESPGK	-	T	0.997	58.3	25	16.6	58.3	0	1	0	0	2	1774.84	6268.9	1127050	1	16
Mudpit_Aged L3_4 Posterior NP IAF	Complement component 8, beta polypeptide, isoform CRA_b OS=Homo sapiens GN=C8B PE=2 SV=1	B7Z550,B7Z555,F5GY80,F5H7G1,P07358	C8B	67046.9	13	17	47	DTMVEDLVVLVR	R	G	0.997	70.7	26.5	17.4	70.7	0	5	1	0	2	1388.75	8547.25	137070000	417	428
Mudpit_Aged L3_4 Posterior NP IAF	Complement component 8, beta polypeptide, isoform CRA_b OS=Homo sapiens GN=C8B PE=2 SV=1	B7Z550,B7Z555,F5GY80,F5H7G1,P07358	C8B	67046.9	13	17	47	EYESYSDFER	K	N	0.997	50.2	25	16.1	50.2	0	6	0	0	2	1324.53	4503.35	56009900	233	242
Mudpit_Aged L3_4 Posterior NP IAF	Complement component 8, beta polypeptide, isoform CRA_b OS=Homo sapiens GN=C8B PE=2 SV=1	B7Z550,B7Z555,F5GY80,F5H7G1,P07358	C8B	67046.9	13	17	47	GGASEHITTLAYQELPTADLMQEWGDAVQYNPAIIK	R	V	0.994	56.8	30.9	16.5	56.8	0	0	1	0	2	3930.92	10485.4	337723	429	464
Mudpit_Aged L3_4 Posterior NP IAF	Complement component 8, beta polypeptide, isoform CRA_b OS=Homo sapiens GN=C8B PE=2 SV=1	B7Z550,B7Z555,F5GY80,F5H7G1,P07358	C8B	67046.9	13	17	47	IPGIFELGISSQSDR	K	G	0.997	75.6	29.8	17.7	75.6	0	7	0	0	2	1618.84	8888.02	94089700	260	274
Mudpit_Aged L3_4 Posterior NP IAF	Complement component 8, beta polypeptide, isoform CRA_b OS=Homo sapiens GN=C8B PE=2 SV=1	B7Z550,B7Z555,F5GY80,F5H7G1,P07358	C8B	67046.9	13	17	47	KPYNVESYTPQTQGK	R	Y	0.997	102	25.8	19.4	102	0	3	4	0	2	1739.86	3893.89	53477100	212	226
Mudpit_Aged L3_4 Posterior NP IAF	Complement component 8, beta polypeptide, isoform CRA_b OS=Homo sapiens GN=C8B PE=2 SV=1	B7Z550,B7Z555,F5GY80,F5H7G1,P07358	C8B	67046.9	13	17	47	LPLEYSYGEYR	R	D	0.997	49.9	25.9	16.1	49.9	0	4	0	0	2	1389.67	6077.89	74938300	324	334
Mudpit_Aged L3_4 Posterior NP IAF	Complement component 8, beta polypeptide, isoform CRA_b OS=Homo sapiens GN=C8B PE=2 SV=1	B7Z550,B7Z555,F5GY80,F5H7G1,P07358	C8B	67046.9	13	17	47	QALEEFQK	K	E	0.99	50.2	28.4	24.1	42.2	0	4	0	0	2	992.505	2853.1	37725300	491	498
Mudpit_Aged L3_4 Posterior NP IAF	Complement component 8, beta polypeptide, isoform CRA_b OS=Homo sapiens GN=C8B PE=2 SV=1	B7Z550,B7Z555,F5GY80,F5H7G1,P07358	C8B	67046.9	13	17	47	RDTMVEDLVVLVR	K	G	0.989	49.5	27	16.1	49.5	0	0	3	0	2	1560.84	9582.11	15005000	416	428
Mudpit_Aged L3_4 Posterior NP IAF	Complement component 8, beta polypeptide, isoform CRA_b OS=Homo sapiens GN=C8B PE=2 SV=1	B7Z550,B7Z555,F5GY80,F5H7G1,P07358	C8B	67046.9	13	17	47	RLPLEYSYGEYR	K	D	0.948	37.1	27.7	15.3	37.1	0	0	1	0	2	1545.77	6447.07	11741600	323	334
Mudpit_Aged L3_4 Posterior NP IAF	Complement component 8, beta polypeptide, isoform CRA_b OS=Homo sapiens GN=C8B PE=2 SV=1	B7Z550,B7Z555,F5GY80,F5H7G1,P07358	C8B	67046.9	13	17	47	SDLEVAHYK	R	L	0.997	56.8	27.4	18.7	54.7	0	3	0	0	2	1061.53	3556.6	22381800	297	305
Mudpit_Aged L3_4 Posterior NP IAF	Complement component 8, beta polypeptide, isoform CRA_b OS=Homo sapiens GN=C8B PE=2 SV=1	B7Z550,B7Z555,F5GY80,F5H7G1,P07358	C8B	67046.9	13	17	47	SGFSFGFK	K	I	0.99	53.3	25.1	21	48.6	0	2	0	0	2	876.425	6517.23	23494700	252	259
Mudpit_Aged L3_4 Posterior NP IAF	Complement component 8, beta polypeptide, isoform CRA_b OS=Homo sapiens GN=C8B PE=2 SV=1	B7Z550,B7Z555,F5GY80,F5H7G1,P07358	C8B	67046.9	13	17	47	SLMLHYEFLQR	R	V	0.997	51	26.7	16.2	51	0	1	0	0	2	1436.74	9092.1	14153500	310	320
Mudpit_Aged L3_4 Posterior NP IAF	Complement component 8, beta polypeptide, isoform CRA_b OS=Homo sapiens GN=C8B PE=2 SV=1	B7Z550,B7Z555,F5GY80,F5H7G1,P07358	C8B	67046.9	13	17	47	VEPLYELVTATDFAYSSTVR	K	Q	0.997	81.3	38.1	18.1	81.3	0	2	0	0	2	2261.13	9545.85	19144300	467	486
Mudpit_Aged L3_4 Posterior NP IAF	Complement component C8 alpha chain OS=Homo sapiens GN=C8A PE=1 SV=2	P07357	C8A	65163.8	7	12	25	ALDQYLMEFNACR	R	C	0.997	58.7	25	16.7	58.7	0	3	0	0	2	1631.72	8139.14	19705400	486	498
Mudpit_Aged L3_4 Posterior NP IAF	Complement component C8 alpha chain OS=Homo sapiens GN=C8A PE=1 SV=2	P07357	C8A	65163.8	7	12	25	AMAVEDIISR	K	V	0.997	56.4	27.4	17.7	55.2	0	5	0	0	2	1120.57	5750.05	116745000	413	422
Mudpit_Aged L3_4 Posterior NP IAF	Complement component C8 alpha chain OS=Homo sapiens GN=C8A PE=1 SV=2	P07357	C8A	65163.8	7	12	25	HTSLGPLEAK	R	R	0.997	65.8	25.1	26.1	56.8	0	4	1	0	2	1052.57	3773.62	208801000	470	479
Mudpit_Aged L3_4 Posterior NP IAF	Complement component C8 alpha chain OS=Homo sapiens GN=C8A PE=1 SV=2	P07357	C8A	65163.8	7	12	25	LGSLGAACEQTQTEGAK	R	A	0.997	49.5	25	16.1	49.5	0	2	0	0	2	1721.8	3238.97	4662480	521	537
Mudpit_Aged L3_4 Posterior NP IAF	Complement component C8 alpha chain OS=Homo sapiens GN=C8A PE=1 SV=2	P07357	C8A	65163.8	7	12	25	MESLGITSR	K	D	0.997	45.8	27.9	15.9	45.8	0	5	0	0	2	993.503	2776.84	58036300	362	370
Mudpit_Aged L3_4 Posterior NP IAF	Complement component C8 alpha chain OS=Homo sapiens GN=C8A PE=1 SV=2	P07357	C8A	65163.8	7	12	25	YHFEALADTGISSEFYDNANDLLSK	K	V	0.996	72.5	25.2	17.5	72.5	0	0	1	0	2	2820.3	9635.6	1300130	215	239
Mudpit_Aged L3_4 Posterior NP IAF	Complement component C8 alpha chain OS=Homo sapiens GN=C8A PE=1 SV=2	P07357	C8A	65163.8	7	12	25	YNPVVIDFEMQPIHEVLR	K	H	0.997	62.6	27	16.9	62.6	0	2	2	0	2	2215.12	9211.42	45188200	452	469
Mudpit_Aged L3_4 Posterior NP IAF	Cytokine receptor-like factor 1 OS=Homo sapiens GN=CRLF1 PE=1 SV=1	O75462	CRLF1	46302.2	4	4	8	NQDEGILPSGR	R	R	0.997	36.5	26.1	15.3	36.5	0	1	0	0	2	1185.59	3312.22	5963540	403	413
Mudpit_Aged L3_4 Posterior NP IAF	Cytokine receptor-like factor 1 OS=Homo sapiens GN=CRLF1 PE=1 SV=1	O75462	CRLF1	46302.2	4	4	8	VEDSVDWK	R	V	0.99	45.3	25.9	20.1	41	0	2	0	0	2	977.457	3252.93	10982900	278	285
Mudpit_Aged L3_4 Posterior NP IAF	Cytokine receptor-like factor 1 OS=Homo sapiens GN=CRLF1 PE=1 SV=1	O75462	CRLF1	46302.2	4	4	8	VGGLEDQLSVR	R	W	0.997	63.9	26.4	17	63.9	0	4	0	0	2	1172.63	4860.95	62894500	246	256
Mudpit_Aged L3_4 Posterior NP IAF	Cytokine receptor-like factor 1 OS=Homo sapiens GN=CRLF1 PE=1 SV=1	O75462	CRLF1	46302.2	4	4	8	YRVEDSVDWK	R	V	0.984	44.2	25	15.8	44.2	0	0	1	0	2	1296.62	4855.33	4977850	276	285
Mudpit_Aged L3_4 Posterior NP IAF	Metalloproteinase inhibitor 4 OS=Homo sapiens GN=TIMP4 PE=2 SV=1	Q99727	TIMP4	25502.6	2	2	3	QYLLTGQVLSDGK	K	V	0.997	43.9	26.6	15.7	43.9	0	1	0	0	2	1421.76	6097.57	14398300	113	125
Mudpit_Aged L3_4 Posterior NP IAF	Metalloproteinase inhibitor 4 OS=Homo sapiens GN=TIMP4 PE=2 SV=1	Q99727	TIMP4	25502.6	2	2	3	VVPASADPADTEK	K	M	0.997	42.7	28.7	15.7	42.7	0	2	0	0	2	1299.64	2042.05	8002280	57	69
Mudpit_Aged L3_4 Posterior NP IAF	Collagen alpha-1(XII) chain OS=Homo sapiens GN=COL12A1 PE=1 SV=1	D6RGG3,Q99715	COL12A1	333145	20	20	24	DELLAAIK	R	K	0.99	38.5	27.5	16.6	37.3	0	1	0	0	2	872.509	5883.91	8873680	201	208
Mudpit_Aged L3_4 Posterior NP IAF	Collagen alpha-1(XII) chain OS=Homo sapiens GN=COL12A1 PE=1 SV=1	D6RGG3,Q99715	COL12A1	333145	20	20	24	DPHTEFTLK	R	K	0.972	41.5	25.1	15.6	41.5	0	0	1	0	2	1087.54	3952.36	3777830	487	495
Mudpit_Aged L3_4 Posterior NP IAF	Collagen alpha-1(XII) chain OS=Homo sapiens GN=COL12A1 PE=1 SV=1	D6RGG3,Q99715	COL12A1	333145	20	20	24	GEVQTVTFDTEEVK	R	T	0.997	76.6	25.9	17.8	76.6	0	1	0	0	2	1581.76	5615.99	2692440	2628	2641
Mudpit_Aged L3_4 Posterior NP IAF	Collagen alpha-1(XII) chain OS=Homo sapiens GN=COL12A1 PE=1 SV=1	D6RGG3,Q99715	COL12A1	333145	20	20	24	GPGDLEAPSNLVISER	K	T	0.993	38.7	27	15.4	38.7	0	1	0	0	2	1653.84	6531.05	5397700	1381	1396
Mudpit_Aged L3_4 Posterior NP IAF	Collagen alpha-1(XII) chain OS=Homo sapiens GN=COL12A1 PE=1 SV=1	D6RGG3,Q99715	COL12A1	333145	20	20	24	IEQELAAIK	R	K	0.997	45.4	26.6	21.4	39.8	0	1	0	0	2	1014.58	4070.18	8990960	620	628
Mudpit_Aged L3_4 Posterior NP IAF	Collagen alpha-1(XII) chain OS=Homo sapiens GN=COL12A1 PE=1 SV=1	D6RGG3,Q99715	COL12A1	333145	20	20	24	ITYQPSTGEGNEQTTTIGGR	R	Q	0.997	53.4	25.7	16.3	53.4	0	3	0	0	2	2110.01	3941.77	20862400	1785	1804
Mudpit_Aged L3_4 Posterior NP IAF	Collagen alpha-1(XII) chain OS=Homo sapiens GN=COL12A1 PE=1 SV=1	D6RGG3,Q99715	COL12A1	333145	20	20	24	IVEVFDIGPK	R	R	0.996	36.8	26.2	25.7	26.4	0	1	0	0	2	1116.63	7663.66	4260090	1225	1234
Mudpit_Aged L3_4 Posterior NP IAF	Collagen alpha-1(XII) chain OS=Homo sapiens GN=COL12A1 PE=1 SV=1	D6RGG3,Q99715	COL12A1	333145	20	20	24	LLPETPSDPFAIWQITDR	R	D	0.997	72.9	27.1	17.6	72.9	0	2	0	0	2	2099.08	9307.74	20734900	2585	2602
Mudpit_Aged L3_4 Posterior NP IAF	Collagen alpha-1(XII) chain OS=Homo sapiens GN=COL12A1 PE=1 SV=1	D6RGG3,Q99715	COL12A1	333145	20	20	24	MIATDPDDTHAYNVADFESLSR	K	I	0.991	55.1	25	16.4	55.1	0	0	1	0	2	2468.1	7468.38	9167870	1345	1366
Mudpit_Aged L3_4 Posterior NP IAF	Collagen alpha-1(XII) chain OS=Homo sapiens GN=COL12A1 PE=1 SV=1	D6RGG3,Q99715	COL12A1	333145	20	20	24	NFASVQGVSLESGSFPSYSAYR	K	I	0.997	84.9	25.3	18.3	84.9	0	1	0	0	2	2353.11	8538.48	2653200	2533	2554
Mudpit_Aged L3_4 Posterior NP IAF	Collagen alpha-1(XII) chain OS=Homo sapiens GN=COL12A1 PE=1 SV=1	D6RGG3,Q99715	COL12A1	333145	20	20	24	NLQPDTSYTVTVVPVYTEGDGGR	R	T	0.997	68.7	26.2	17.3	68.7	0	1	0	0	2	2468.19	7410.34	5516000	1902	1924
Mudpit_Aged L3_4 Posterior NP IAF	Collagen alpha-1(XII) chain OS=Homo sapiens GN=COL12A1 PE=1 SV=1	D6RGG3,Q99715	COL12A1	333145	20	20	24	QYLVTYTPVAGGETQEVTVR	K	G	0.997	78.9	26.8	17.9	78.9	0	1	0	0	2	2211.13	6692.38	4708180	843	862
Mudpit_Aged L3_4 Posterior NP IAF	Collagen alpha-1(XII) chain OS=Homo sapiens GN=COL12A1 PE=1 SV=1	D6RGG3,Q99715	COL12A1	333145	20	20	24	SLYDDVDTGEK	K	N	0.995	34.7	25	15.2	34.7	0	1	0	0	2	1241.55	4060.71	2658050	941	951
Mudpit_Aged L3_4 Posterior NP IAF	Collagen alpha-1(XII) chain OS=Homo sapiens GN=COL12A1 PE=1 SV=1	D6RGG3,Q99715	COL12A1	333145	20	20	24	SQDEVEIPAR	K	E	0.997	56.8	25	16.5	56.8	0	1	0	0	2	1143.56	3518.19	4862010	253	262
Mudpit_Aged L3_4 Posterior NP IAF	Collagen alpha-1(XII) chain OS=Homo sapiens GN=COL12A1 PE=1 SV=1	D6RGG3,Q99715	COL12A1	333145	20	20	24	TSDPTMSSFR	K	V	0.997	38.9	25	15.4	38.9	0	2	0	0	2	1128.5	3248.23	6794520	1095	1104
Mudpit_Aged L3_4 Posterior NP IAF	Collagen alpha-1(XII) chain OS=Homo sapiens GN=COL12A1 PE=1 SV=1	D6RGG3,Q99715	COL12A1	333145	20	20	24	VAIIITDGK	K	S	0.984	31.8	26.2	35	11.8	0	1	0	0	2	929.567	4186.51	14231200	244	252
Mudpit_Aged L3_4 Posterior NP IAF	Collagen alpha-1(XII) chain OS=Homo sapiens GN=COL12A1 PE=1 SV=1	D6RGG3,Q99715	COL12A1	333145	20	20	24	VGVVQYSSDTR	R	T	0.997	44.6	26.2	15.8	44.6	0	1	0	0	2	1210.61	2702.68	4445020	179	189
Mudpit_Aged L3_4 Posterior NP IAF	Collagen alpha-1(XII) chain OS=Homo sapiens GN=COL12A1 PE=1 SV=1	D6RGG3,Q99715	COL12A1	333145	20	20	24	VLVVVTDGR	K	S	0.997	53.1	26.6	31.3	38.1	0	1	0	0	2	957.573	3839.46	10524300	2428	2436
Mudpit_Aged L3_4 Posterior NP IAF	Collagen alpha-1(XII) chain OS=Homo sapiens GN=COL12A1 PE=1 SV=1	D6RGG3,Q99715	COL12A1	333145	20	20	24	VSWDPSPSPVLGYK	R	I	0.997	46.6	27.2	15.9	46.6	0	1	0	0	2	1531.78	7374.45	2837110	2134	2147
Mudpit_Aged L3_4 Posterior NP IAF	Collagen alpha-1(XII) chain OS=Homo sapiens GN=COL12A1 PE=1 SV=1	D6RGG3,Q99715	COL12A1	333145	20	20	24	VYDPSTSTLNVR	R	W	0.997	57.1	27.8	16.6	57.1	0	1	0	0	2	1351.69	4184.95	10853900	1852	1863
Mudpit_Aged L3_4 Posterior NP IAF	Collagen alpha-1(XIV) chain OS=Homo sapiens GN=COL14A1 PE=1 SV=3	Q05707	COL14A1	193516	4	4	4	DTLFTAESGTR	R	R	0.997	39.6	25.5	15.5	39.6	0	1	0	0	2	1197.57	4370.3	3875490	1121	1131
Mudpit_Aged L3_4 Posterior NP IAF	Collagen alpha-1(XIV) chain OS=Homo sapiens GN=COL14A1 PE=1 SV=3	Q05707	COL14A1	193516	4	4	4	IGLAQYSGDPR	R	I	0.997	42.4	28.3	15.7	42.4	0	1	0	0	2	1176.6	3956.34	6180240	197	207
Mudpit_Aged L3_4 Posterior NP IAF	Collagen alpha-1(XIV) chain OS=Homo sapiens GN=COL14A1 PE=1 SV=3	Q05707	COL14A1	193516	4	4	4	NLVVGDETTSSLR	R	V	0.997	60.1	27.4	16.8	60.1	0	1	0	0	2	1390.72	4758.91	3918980	740	752
Mudpit_Aged L3_4 Posterior NP IAF	Collagen alpha-1(XIV) chain OS=Homo sapiens GN=COL14A1 PE=1 SV=3	Q05707	COL14A1	193516	4	4	4	WDISDSDVQQFR	K	V	0.997	46.9	25	15.9	46.9	0	1	0	0	2	1495.68	6622.15	4151080	755	766
Mudpit_Aged L3_4 Posterior NP IAF	Epididymis secretory sperm binding protein Li 71p OS=Homo sapiens GN=HEL-S-71p PE=2 SV=1	A0A0K0K1H8	HEL-S-71p	77080.2	22	40	258	ADRDQYELLCLDNTR	K	K	0.997	48.7	25	23.8	40.9	0	4	1	0	2	1882.86	7661.4	32841200	237	251
Mudpit_Aged L3_4 Posterior NP IAF	Epididymis secretory sperm binding protein Li 71p OS=Homo sapiens GN=HEL-S-71p PE=2 SV=1	A0A0K0K1H8	HEL-S-71p	77080.2	22	40	258	CDEWSVNSVGK	K	I	0.997	46.3	25	15.9	46.3	0	4	0	0	2	1281.54	4661.89	104952000	374	384
Mudpit_Aged L3_4 Posterior NP IAF	Epididymis secretory sperm binding protein Li 71p OS=Homo sapiens GN=HEL-S-71p PE=2 SV=1	A0A0K0K1H8	HEL-S-71p	77080.2	22	40	258	DQYELLCLDNTR	R	K	0.996	37.6	25	16.6	36.3	0	1	0	0	2	1540.69	7463.02	4298900	240	251
Mudpit_Aged L3_4 Posterior NP IAF	Epididymis secretory sperm binding protein Li 71p OS=Homo sapiens GN=HEL-S-71p PE=2 SV=1	A0A0K0K1H8	HEL-S-71p	77080.2	22	40	258	DSGFQMNQLR	K	G	0.997	62.3	25	16.9	62.3	0	21	0	0	2	1211.55	3057.22	172133000	123	132
Mudpit_Aged L3_4 Posterior NP IAF	Epididymis secretory sperm binding protein Li 71p OS=Homo sapiens GN=HEL-S-71p PE=2 SV=1	A0A0K0K1H8	HEL-S-71p	77080.2	22	40	258	EDLIWELLNQAQEHFGK	K	D	0.997	66	26.8	17.1	66	0	1	1	0	2	2070.03	10444	791018	279	295
Mudpit_Aged L3_4 Posterior NP IAF	Epididymis secretory sperm binding protein Li 71p OS=Homo sapiens GN=HEL-S-71p PE=2 SV=1	A0A0K0K1H8	HEL-S-71p	77080.2	22	40	258	EDPQTFYYAVAVVK	K	K	0.997	78.1	26.3	17.9	78.1	0	19	4	0	2	1629.82	8310.98	1688160000	108	121
Mudpit_Aged L3_4 Posterior NP IAF	Epididymis secretory sperm binding protein Li 71p OS=Homo sapiens GN=HEL-S-71p PE=2 SV=1	A0A0K0K1H8	HEL-S-71p	77080.2	22	40	258	EFQLFSSPHGK	K	D	0.997	70.9	27.2	17.4	70.9	0	10	8	0	2	1276.63	7231.59	711452000	300	310
Mudpit_Aged L3_4 Posterior NP IAF	Epididymis secretory sperm binding protein Li 71p OS=Homo sapiens GN=HEL-S-71p PE=2 SV=1	A0A0K0K1H8	HEL-S-71p	77080.2	22	40	258	EGYYGYTGAFR	K	C	0.997	66.1	25	17.1	66.1	0	8	0	0	2	1283.57	5955.68	1133560000	531	541
Mudpit_Aged L3_4 Posterior NP IAF	Epididymis secretory sperm binding protein Li 71p OS=Homo sapiens GN=HEL-S-71p PE=2 SV=1	A0A0K0K1H8	HEL-S-71p	77080.2	22	40	258	FDEFFSEGCAPGSK	R	K	0.997	66.2	25	17.1	66.2	0	5	0	0	2	1578.64	6551.65	36929400	495	508
Mudpit_Aged L3_4 Posterior NP IAF	Epididymis secretory sperm binding protein Li 71p OS=Homo sapiens GN=HEL-S-71p PE=2 SV=1	A0A0K0K1H8	HEL-S-71p	77080.2	22	40	258	HQTVPQNTGGK	K	N	0.997	44	25.5	15.7	44	0	2	0	0	2	1166.59	1781.92	1186990	554	564
Mudpit_Aged L3_4 Posterior NP IAF	Epididymis secretory sperm binding protein Li 71p OS=Homo sapiens GN=HEL-S-71p PE=2 SV=1	A0A0K0K1H8	HEL-S-71p	77080.2	22	40	258	HSTIFENLANK	K	A	0.997	75.7	26.6	17.7	75.7	0	12	7	0	2	1273.65	7155.34	1010880000	226	236
Mudpit_Aged L3_4 Posterior NP IAF	Epididymis secretory sperm binding protein Li 71p OS=Homo sapiens GN=HEL-S-71p PE=2 SV=1	A0A0K0K1H8	HEL-S-71p	77080.2	22	40	258	IMNGEADAMSLDGGFVYIAGK	K	C	0.997	168	25.4	23.5	168	0	25	6	0	2	2159.01	8621.45	135856000	400	420
Mudpit_Aged L3_4 Posterior NP IAF	Epididymis secretory sperm binding protein Li 71p OS=Homo sapiens GN=HEL-S-71p PE=2 SV=1	A0A0K0K1H8	HEL-S-71p	77080.2	22	40	258	KDSGFQMNQLR	K	G	0.997	76.3	25.4	18.1	76	0	4	1	0	2	1323.65	4613.27	73783600	122	132
Mudpit_Aged L3_4 Posterior NP IAF	Epididymis secretory sperm binding protein Li 71p OS=Homo sapiens GN=HEL-S-71p PE=2 SV=1	A0A0K0K1H8	HEL-S-71p	77080.2	22	40	258	KPVEEYANCHLAR	R	A	0.996	50.4	25.6	16.2	50.4	0	2	4	5	2	1587.76	4814.3	226397000	588	600
Mudpit_Aged L3_4 Posterior NP IAF	Epididymis secretory sperm binding protein Li 71p OS=Homo sapiens GN=HEL-S-71p PE=2 SV=1	A0A0K0K1H8	HEL-S-71p	77080.2	22	40	258	MYLGYEYVTAIR	K	N	0.997	66.8	27.1	17.2	66.8	0	54	11	0	2	1494.73	8453.3	1652450000	332	343
Mudpit_Aged L3_4 Posterior NP IAF	Epididymis secretory sperm binding protein Li 71p OS=Homo sapiens GN=HEL-S-71p PE=2 SV=1	A0A0K0K1H8	HEL-S-71p	77080.2	22	40	258	SAGWNIPIGLLYCDLPEPR	R	K	0.977	37.3	26.2	15.3	37.3	0	0	1	0	2	2172.08	9453.07	9731760	144	162
Mudpit_Aged L3_4 Posterior NP IAF	Epididymis secretory sperm binding protein Li 71p OS=Homo sapiens GN=HEL-S-71p PE=2 SV=1	A0A0K0K1H8	HEL-S-71p	77080.2	22	40	258	SASDLTWDNLK	K	G	0.997	80.4	26.7	18	80.4	0	13	0	0	2	1249.61	5965.03	2209680000	454	464
Mudpit_Aged L3_4 Posterior NP IAF	Epididymis secretory sperm binding protein Li 71p OS=Homo sapiens GN=HEL-S-71p PE=2 SV=1	A0A0K0K1H8	HEL-S-71p	77080.2	22	40	258	SDNCEDTPEAGYFAVAVVK	K	K	0.997	94.1	25	18.9	94.1	0	5	2	0	2	2072.91	7890.03	40035400	434	452
Mudpit_Aged L3_4 Posterior NP IAF	Epididymis secretory sperm binding protein Li 71p OS=Homo sapiens GN=HEL-S-71p PE=2 SV=1	A0A0K0K1H8	HEL-S-71p	77080.2	22	40	258	SVIPSDGPSVACVK	K	K	0.997	42.1	26.7	18.9	38.8	0	2	0	0	2	1416.7	5381.13	20401400	47	60
Mudpit_Aged L3_4 Posterior NP IAF	Epididymis secretory sperm binding protein Li 71p OS=Homo sapiens GN=HEL-S-71p PE=2 SV=1	A0A0K0K1H8	HEL-S-71p	77080.2	22	40	258	TAGWNIPMGLLYNK	R	I	0.997	55.8	27.3	16.5	55.8	0	7	0	0	2	1577.81	8772.64	299060000	476	489
Mudpit_Aged L3_4 Posterior NP IAF	Epididymis secretory sperm binding protein Li 71p OS=Homo sapiens GN=HEL-S-71p PE=2 SV=1	A0A0K0K1H8	HEL-S-71p	77080.2	22	40	258	WCAVSEHEATK	R	C	0.968	39	27.2	15.4	39	0	0	1	0	2	1318.57	3085.23	5619840	27	37
Mudpit_Aged L3_4 Posterior NP IAF	Epididymis secretory sperm binding protein Li 71p OS=Homo sapiens GN=HEL-S-71p PE=2 SV=1	A0A0K0K1H8	HEL-S-71p	77080.2	22	40	258	YLGEEYVK	K	A	0.99	37.8	25	16.8	36.3	0	7	0	0	2	1000.5	4521.02	1602510000	669	676
Mudpit_Aged L3_4 Posterior NP IAF	Carbohydrate sulfotransferase 3 OS=Homo sapiens GN=CHST3 PE=1 SV=3	Q7LGC8	CHST3	54707.1	5	5	6	FAGIPLTPQVEDWIQK	R	N	0.997	49.7	25.9	16.1	49.7	0	1	0	0	2	1841.98	9201.86	17809600	388	403
Mudpit_Aged L3_4 Posterior NP IAF	Carbohydrate sulfotransferase 3 OS=Homo sapiens GN=CHST3 PE=1 SV=3	Q7LGC8	CHST3	54707.1	5	5	6	LSAELGLR	R	Q	0.99	43.3	30.3	23.8	35.3	0	1	0	0	2	858.504	4218.02	18431600	350	357
Mudpit_Aged L3_4 Posterior NP IAF	Carbohydrate sulfotransferase 3 OS=Homo sapiens GN=CHST3 PE=1 SV=3	Q7LGC8	CHST3	54707.1	5	5	6	QLEFLQPLAEDPR	R	L	0.997	64.2	26.1	17	64.2	0	1	0	0	2	1555.81	7843.07	14562800	279	291
Mudpit_Aged L3_4 Posterior NP IAF	Carbohydrate sulfotransferase 3 OS=Homo sapiens GN=CHST3 PE=1 SV=3	Q7LGC8	CHST3	54707.1	5	5	6	SVSLLEER	R	G	0.981	33.9	27.9	15.1	33.9	0	1	0	0	2	932.505	4099.92	46598200	466	473
Mudpit_Aged L3_4 Posterior NP IAF	Carbohydrate sulfotransferase 3 OS=Homo sapiens GN=CHST3 PE=1 SV=3	Q7LGC8	CHST3	54707.1	5	5	6	TVSFEPGGANAAGSALVYR	R	D	0.997	112	27.4	20	112	0	2	0	0	2	1866.93	7013.99	7013880	171	189
Mudpit_Aged L3_4 Posterior NP IAF	cDNA, FLJ93532, highly similar to Homo sapiens osteomodulin (OMD), mRNA OS=Homo sapiens PE=2 SV=1	B2R7N9,Q99983	OMD	49494.1	3	4	7	IDYGVFAK	K	L	0.986	29.1	25	14.8	29.1	0	1	0	0	2	912.483	5841.06	6015140	132	139
Mudpit_Aged L3_4 Posterior NP IAF	cDNA, FLJ93532, highly similar to Homo sapiens osteomodulin (OMD), mRNA OS=Homo sapiens PE=2 SV=1	B2R7N9,Q99983	OMD	49494.1	3	4	7	LLLGYNEISK	R	L	0.994	41.9	26.5	26	31.5	0	3	0	0	2	1149.65	6440.76	24352400	167	176
Mudpit_Aged L3_4 Posterior NP IAF	cDNA, FLJ93532, highly similar to Homo sapiens osteomodulin (OMD), mRNA OS=Homo sapiens PE=2 SV=1	B2R7N9,Q99983	OMD	49494.1	3	4	7	NLEHLYLQNNEIEK	R	M	0.997	77.8	26.4	17.9	77.8	0	2	1	0	2	1756.89	5933.88	24262300	301	314
Mudpit_Aged L3_4 Posterior NP IAF	Collagen alpha-1(III) chain OS=Homo sapiens GN=COL3A1 PE=1 SV=4	P02461	COL3A1	138565	4	6	9	GPVGPSGPPGK	R	D	0.997	51.5	27.5	28.3	39.5	0	1	0	0	2	949.51	1865.92	320485	1140	1150
Mudpit_Aged L3_4 Posterior NP IAF	Collagen alpha-1(III) chain OS=Homo sapiens GN=COL3A1 PE=1 SV=4	P02461	COL3A1	138565	4	6	9	HWWTDSSAEK	K	K	0.994	33.7	25	15.1	33.7	0	1	0	0	2	1246.55	3862.57	9327830	1314	1323
Mudpit_Aged L3_4 Posterior NP IAF	Collagen alpha-1(III) chain OS=Homo sapiens GN=COL3A1 PE=1 SV=4	P02461	COL3A1	138565	4	6	9	NGETGPQGPPGPTGPGGDK	K	G	0.997	97.7	25	19.1	97.7	0	4	1	0	2	1719.79	2129.66	10131900	611	629
Mudpit_Aged L3_4 Posterior NP IAF	Collagen alpha-1(III) chain OS=Homo sapiens GN=COL3A1 PE=1 SV=4	P02461	COL3A1	138565	4	6	9	NSIAYMDQASGNVK	K	K	0.997	64.9	25	17.1	64.8	0	2	0	0	2	1513.7	3184.25	4042800	1374	1387
Mudpit_Aged L3_4 Posterior NP IAF	Carboxypeptidase B2 OS=Homo sapiens GN=CPB2 PE=1 SV=2	Q96IY4	CPB2	48424.7	5	7	17	DHEELSLVASEAVR	K	A	0.997	65	27	17.1	65	0	2	4	0	2	1554.78	7069.56	49357700	329	342
Mudpit_Aged L3_4 Posterior NP IAF	Carboxypeptidase B2 OS=Homo sapiens GN=CPB2 PE=1 SV=2	Q96IY4	CPB2	48424.7	5	7	17	DTGTYGFLLPER	R	Y	0.997	83.3	25.1	18.2	83.3	0	3	0	0	2	1368.68	8151.24	100424000	388	399
Mudpit_Aged L3_4 Posterior NP IAF	Carboxypeptidase B2 OS=Homo sapiens GN=CPB2 PE=1 SV=2	Q96IY4	CPB2	48424.7	5	7	17	IHIGSSFEK	K	Y	0.986	35.5	28.6	21.4	29.3	0	2	0	0	2	1017.54	4859.6	17014200	147	155
Mudpit_Aged L3_4 Posterior NP IAF	Carboxypeptidase B2 OS=Homo sapiens GN=CPB2 PE=1 SV=2	Q96IY4	CPB2	48424.7	5	7	17	SKDHEELSLVASEAVR	K	A	0.996	64.8	26.8	17.1	64.8	0	0	2	2	2	1769.9	8763.79	25722100	327	342
Mudpit_Aged L3_4 Posterior NP IAF	Carboxypeptidase B2 OS=Homo sapiens GN=CPB2 PE=1 SV=2	Q96IY4	CPB2	48424.7	5	7	17	YSFTIELR	K	D	0.99	39.7	25.6	15.5	39.7	0	2	0	0	2	1028.54	7525.99	17323100	380	387
Mudpit_Aged L3_4 Posterior NP IAF	Calcyphosin OS=Homo sapiens GN=CAPS PE=1 SV=1	K7EL21,Q13938,Q8NF12,Q96ET4	CAPS,FLJ00390	20967.7	3	3	5	SGDGVVTVDDLR	R	G	0.997	88.1	26.7	18.5	88.1	0	2	0	0	2	1232.61	4914.08	25719200	108	119
Mudpit_Aged L3_4 Posterior NP IAF	Calcyphosin OS=Homo sapiens GN=CAPS PE=1 SV=1	K7EL21,Q13938,Q8NF12,Q96ET4	CAPS,FLJ00390	20967.7	3	3	5	SGEWTEDEVLR	R	R	0.997	49	25	16.1	49	0	2	0	0	2	1320.61	5839.35	8301170	132	142
Mudpit_Aged L3_4 Posterior NP IAF	Calcyphosin OS=Homo sapiens GN=CAPS PE=1 SV=1	K7EL21,Q13938,Q8NF12,Q96ET4	CAPS,FLJ00390	20967.7	3	3	5	SLDADEFR	R	Q	0.99	53.2	25	20.2	49.3	0	1	0	0	2	952.437	4153.03	13754000	40	47
Mudpit_Aged L3_4 Posterior NP IAF	Melanotransferrin OS=Homo sapiens GN=MFI2 PE=1 SV=2	P08582	MFI2	80213.8	5	6	9	DSSHAFTLDELR	R	G	0.99	45.5	25.5	15.8	45.5	0	2	1	0	2	1390.66	6393.05	21068700	460	471
Mudpit_Aged L3_4 Posterior NP IAF	Melanotransferrin OS=Homo sapiens GN=MFI2 PE=1 SV=2	P08582	MFI2	80213.8	5	6	9	SEDYELLCPNGAR	R	A	0.981	27.4	25	14.7	27.4	0	1	0	0	2	1524.66	5678.63	5495930	596	608
Mudpit_Aged L3_4 Posterior NP IAF	Melanotransferrin OS=Homo sapiens GN=MFI2 PE=1 SV=2	P08582	MFI2	80213.8	5	6	9	SSHVTIDTLK	R	G	0.992	60	27.2	32.8	44	0	0	1	0	2	1100.59	3704.43	4797120	116	125
Mudpit_Aged L3_4 Posterior NP IAF	Melanotransferrin OS=Homo sapiens GN=MFI2 PE=1 SV=2	P08582	MFI2	80213.8	5	6	9	TVGWNVPVGYLVESGR	R	L	0.997	63	27.3	16.9	63	0	3	0	0	2	1732.9	9036.8	25677300	137	152
Mudpit_Aged L3_4 Posterior NP IAF	Melanotransferrin OS=Homo sapiens GN=MFI2 PE=1 SV=2	P08582	MFI2	80213.8	5	6	9	YYDYSGAFR	R	C	0.997	43.5	25	15.7	43.5	0	1	0	0	2	1141.49	5018.25	18240900	207	215
Mudpit_Aged L3_4 Posterior NP IAF	Fibroblast growth factor-binding protein 2 OS=Homo sapiens GN=FGFBP2 PE=1 SV=1	Q9BYJ0	FGFBP2	24580.7	4	9	14	DSCTMRPSSLGQGAGEVWLR	R	V	0.975	38.8	27.5	15.4	38.8	0	0	1	0	2	2208.02	8826.71	4228750	41	60
Mudpit_Aged L3_4 Posterior NP IAF	Fibroblast growth factor-binding protein 2 OS=Homo sapiens GN=FGFBP2 PE=1 SV=1	Q9BYJ0	FGFBP2	24580.7	4	9	14	DSMEELGK	K	A	0.99	58.7	25	26.3	49.1	0	3	0	0	2	908.403	1621.71	8214900	167	174
Mudpit_Aged L3_4 Posterior NP IAF	Fibroblast growth factor-binding protein 2 OS=Homo sapiens GN=FGFBP2 PE=1 SV=1	Q9BYJ0	FGFBP2	24580.7	4	9	14	EAGPQAHMQQVTSSLK	R	G	0.997	49.1	25.4	16.1	49.1	0	3	3	0	2	1727.84	3637.71	54031900	119	134
Mudpit_Aged L3_4 Posterior NP IAF	Fibroblast growth factor-binding protein 2 OS=Homo sapiens GN=FGFBP2 PE=1 SV=1	Q9BYJ0	FGFBP2	24580.7	4	9	14	QGSTGEEFHFQTGGR	K	D	0.997	117	25	20.3	117	0	2	2	0	2	1637.73	4144.49	76339500	26	40
Mudpit_Aged L3_4 Posterior NP IAF	Collagen alpha-1(II) chain OS=Homo sapiens GN=COL2A1 PE=1 SV=3	P02458	COL2A1	141786	16	26	109	AGGAQLGVMQGPMGPMGPR	K	G	0.997	84.8	25	18.3	37.7	0	8	0	0	2	1827.87	6266.36	27295500	191	209
Mudpit_Aged L3_4 Posterior NP IAF	Collagen alpha-1(II) chain OS=Homo sapiens GN=COL2A1 PE=1 SV=3	P02458	COL2A1	141786	16	26	109	ALLIQGSNDVEIR	K	A	0.997	76.5	26.5	20	0	0	7	0	0	2	1427.79	6155.79	194323000	1410	1422
Mudpit_Aged L3_4 Posterior NP IAF	Collagen alpha-1(II) chain OS=Homo sapiens GN=COL2A1 PE=1 SV=3	P02458	COL2A1	141786	16	26	109	DGETGAAGPPGPAGPAGER	K	G	0.997	84.2	25	18.3	84.2	0	1	0	0	2	1663.77	2478.74	2249820	635	653
Mudpit_Aged L3_4 Posterior NP IAF	Collagen alpha-1(II) chain OS=Homo sapiens GN=COL2A1 PE=1 SV=3	P02458	COL2A1	141786	16	26	109	GEAGAQGPMGPSGPAGAR	R	G	0.997	113	25.1	20.1	113	0	43	16	0	2	1567.73	2073.62	734472000	1089	1106
Mudpit_Aged L3_4 Posterior NP IAF	Collagen alpha-1(II) chain OS=Homo sapiens GN=COL2A1 PE=1 SV=3	P02458	COL2A1	141786	16	26	109	GEPGDDGPSGAEGPPGPQGLAGQR	K	G	0.997	143	25	21.9	143	0	1	0	0	2	2203	4355.25	3206900	957	980
Mudpit_Aged L3_4 Posterior NP IAF	Collagen alpha-1(II) chain OS=Homo sapiens GN=COL2A1 PE=1 SV=3	P02458	COL2A1	141786	16	26	109	GLPGAPGLR	K	G	0.994	34.8	25	15.2	34.8	0	2	0	0	2	837.494	4624.93	7484060	621	629
Mudpit_Aged L3_4 Posterior NP IAF	Collagen alpha-1(II) chain OS=Homo sapiens GN=COL2A1 PE=1 SV=3	P02458	COL2A1	141786	16	26	109	GPEGAQGPR	R	G	0.997	49.5	25	21.4	44.2	0	5	0	0	2	868.427	1234.36	1547030	384	392
Mudpit_Aged L3_4 Posterior NP IAF	Collagen alpha-1(II) chain OS=Homo sapiens GN=COL2A1 PE=1 SV=3	P02458	COL2A1	141786	16	26	109	GPPGPQGPAGEQGPR	K	G	0.997	75.7	27.4	17.7	75.7	0	3	0	0	2	1401.69	1988.32	9652870	120	134
Mudpit_Aged L3_4 Posterior NP IAF	Collagen alpha-1(II) chain OS=Homo sapiens GN=COL2A1 PE=1 SV=3	P02458	COL2A1	141786	16	26	109	GPPGPVGPSGK	R	D	0.996	36.6	27.5	28.7	23.2	0	2	0	0	2	949.51	1799.12	637037	1164	1174
Mudpit_Aged L3_4 Posterior NP IAF	Collagen alpha-1(II) chain OS=Homo sapiens GN=COL2A1 PE=1 SV=3	P02458	COL2A1	141786	16	26	109	GPSGLAGPK	R	G	0.997	62.7	25	23.1	56.6	0	1	0	0	2	783.436	1885.54	476226	534	542
Mudpit_Aged L3_4 Posterior NP IAF	Collagen alpha-1(II) chain OS=Homo sapiens GN=COL2A1 PE=1 SV=3	P02458	COL2A1	141786	16	26	109	NSIAYLDEAAGNLK	K	K	0.997	73.3	27.1	17.6	73.3	0	6	0	0	2	1478.75	6896.75	102798000	1395	1408
Mudpit_Aged L3_4 Posterior NP IAF	Collagen alpha-1(II) chain OS=Homo sapiens GN=COL2A1 PE=1 SV=3	P02458	COL2A1	141786	16	26	109	QGDRGEAGAQGPMGPSGPAGAR	K	G	0.997	60.6	25	16.8	60.6	0	2	6	0	2	2023.94	2515.31	188349000	1085	1106
Mudpit_Aged L3_4 Posterior NP IAF	Collagen alpha-1(II) chain OS=Homo sapiens GN=COL2A1 PE=1 SV=3	P02458	COL2A1	141786	16	26	109	QHDAEVDATLK	R	S	0.997	67.2	25.6	17.2	67.2	0	1	1	0	2	1226.6	2971.67	16617400	1250	1260
Mudpit_Aged L3_4 Posterior NP IAF	Collagen alpha-1(II) chain OS=Homo sapiens GN=COL2A1 PE=1 SV=3	P02458	COL2A1	141786	16	26	109	SGDYWIDPNQGCTLDAMK	K	V	0.997	41.7	25	15.6	41.7	0	1	0	0	2	2087.87	6781.31	2701750	1295	1312
Mudpit_Aged L3_4 Posterior NP IAF	Collagen alpha-1(II) chain OS=Homo sapiens GN=COL2A1 PE=1 SV=3	P02458	COL2A1	141786	16	26	109	SLNNQIESIR	K	S	0.997	49	26.8	16.1	49	0	2	0	0	2	1173.62	4220.81	25384400	1261	1270
Mudpit_Aged L3_4 Posterior NP IAF	Collagen alpha-1(II) chain OS=Homo sapiens GN=COL2A1 PE=1 SV=3	P02458	COL2A1	141786	16	26	109	TGPAGAAGAR	R	G	0.997	49.3	25	16.1	49.3	0	1	0	0	2	828.432	1297.27	1016320	335	344
Mudpit_Aged L3_4 Posterior NP IAF	Collagen alpha-1(I) chain OS=Homo sapiens GN=COL1A1 PE=1 SV=5	P02452	COL1A1	138941	7	9	17	DGEAGAQGPPGPAGPAGER	K	G	0.997	103	25	19.4	103	0	5	2	0	2	1690.78	2369.15	28199200	613	631
Mudpit_Aged L3_4 Posterior NP IAF	Collagen alpha-1(I) chain OS=Homo sapiens GN=COL1A1 PE=1 SV=5	P02452	COL1A1	138941	7	9	17	GEAGPQGPR	K	G	0.995	35.8	25	44.4	6.69	0	1	0	0	2	868.427	1327.64	273498	353	361
Mudpit_Aged L3_4 Posterior NP IAF	Collagen alpha-1(I) chain OS=Homo sapiens GN=COL1A1 PE=1 SV=5	P02452	COL1A1	138941	7	9	17	GFSGLDGAK	R	G	0.994	37.2	26.5	20.4	32.1	0	1	0	0	2	851.426	2878.38	3707340	269	277
Mudpit_Aged L3_4 Posterior NP IAF	Collagen alpha-1(I) chain OS=Homo sapiens GN=COL1A1 PE=1 SV=5	P02452	COL1A1	138941	7	9	17	GPAGPQGPR	R	G	0.989	33	25	34.2	13.9	0	1	0	0	2	836.438	1390.43	407416	1085	1093
Mudpit_Aged L3_4 Posterior NP IAF	Collagen alpha-1(I) chain OS=Homo sapiens GN=COL1A1 PE=1 SV=5	P02452	COL1A1	138941	7	9	17	GPPGPMGPPGLAGPPGESGR	R	E	0.997	61.1	26.6	16.8	61.1	0	2	1	0	2	1800.87	5513.46	12680000	995	1014
Mudpit_Aged L3_4 Posterior NP IAF	Collagen alpha-1(I) chain OS=Homo sapiens GN=COL1A1 PE=1 SV=5	P02452	COL1A1	138941	7	9	17	GVPGPPGAVGPAGK	R	D	0.997	52.7	26.7	16.3	52.7	0	3	0	0	2	1160.64	3132.71	19311200	599	612
Mudpit_Aged L3_4 Posterior NP IAF	Collagen alpha-1(I) chain OS=Homo sapiens GN=COL1A1 PE=1 SV=5	P02452	COL1A1	138941	7	9	17	NSVAYMDQQTGNLK	K	K	0.997	70.8	25	17.4	70.8	0	1	0	0	2	1568.74	3917.58	2131060	1372	1385
Mudpit_Aged L3_4 Posterior NP IAF	Dermatopontin OS=Homo sapiens GN=DPT PE=1 SV=2	Q07507	DPT	24004.7	2	2	3	GATTTFSAVER	R	D	0.997	47.5	25	19.3	44.2	0	1	0	0	2	1139.57	3154.97	9404380	170	180
Mudpit_Aged L3_4 Posterior NP IAF	Dermatopontin OS=Homo sapiens GN=DPT PE=1 SV=2	Q07507	DPT	24004.7	2	2	3	YFESVLDR	R	E	0.986	30.4	25	29.3	15.9	0	2	0	0	2	1028.5	5638.6	23982400	119	126
Mudpit_Aged L3_4 Posterior NP IAF	Enolase 1, (Alpha), isoform CRA_a OS=Homo sapiens GN=ENO1 PE=2 SV=1	A0A024R4F1,P06733	ENO1	47170.2	9	9	27	AAVPSGASTGIYEALELR	R	D	0.997	98.6	27.3	19.2	98.6	0	8	0	0	2	1804.94	8046.82	225302000	33	50
Mudpit_Aged L3_4 Posterior NP IAF	Enolase 1, (Alpha), isoform CRA_a OS=Homo sapiens GN=ENO1 PE=2 SV=1	A0A024R4F1,P06733	ENO1	47170.2	9	9	27	DATNVGDEGGFAPNILENK	K	E	0.997	102	25	19.4	102	0	2	0	0	2	1960.92	7286.04	19142700	203	221
Mudpit_Aged L3_4 Posterior NP IAF	Enolase 1, (Alpha), isoform CRA_a OS=Homo sapiens GN=ENO1 PE=2 SV=1	A0A024R4F1,P06733	ENO1	47170.2	9	9	27	DYPVVSIEDPFDQDDWGAWQK	K	F	0.997	81.1	25	18.1	81.1	0	2	0	0	2	2510.11	9271.48	17168500	286	306
Mudpit_Aged L3_4 Posterior NP IAF	Enolase 1, (Alpha), isoform CRA_a OS=Homo sapiens GN=ENO1 PE=2 SV=1	A0A024R4F1,P06733	ENO1	47170.2	9	9	27	GNPTVEVDLFTSK	R	G	0.997	69.7	26.2	67.1	20	0	2	0	0	2	1406.72	6650.63	54231600	16	28
Mudpit_Aged L3_4 Posterior NP IAF	Enolase 1, (Alpha), isoform CRA_a OS=Homo sapiens GN=ENO1 PE=2 SV=1	A0A024R4F1,P06733	ENO1	47170.2	9	9	27	IGAEVYHNLK	R	N	0.997	49.8	28.2	25.3	40.6	0	1	0	0	2	1143.62	5666.92	4376060	184	193
Mudpit_Aged L3_4 Posterior NP IAF	Enolase 1, (Alpha), isoform CRA_a OS=Homo sapiens GN=ENO1 PE=2 SV=1	A0A024R4F1,P06733	ENO1	47170.2	9	9	27	LAMQEFMILPVGAANFR	K	E	0.997	60.5	26.8	16.8	60.5	0	2	0	0	2	1907.99	9267.91	33894600	163	179
Mudpit_Aged L3_4 Posterior NP IAF	Enolase 1, (Alpha), isoform CRA_a OS=Homo sapiens GN=ENO1 PE=2 SV=1	A0A024R4F1,P06733	ENO1	47170.2	9	9	27	TIAPALVSK	K	K	0.996	37.6	25.8	15.3	37.6	0	2	0	0	2	899.556	3783.33	16298400	72	80
Mudpit_Aged L3_4 Posterior NP IAF	Enolase 1, (Alpha), isoform CRA_a OS=Homo sapiens GN=ENO1 PE=2 SV=1	A0A024R4F1,P06733	ENO1	47170.2	9	9	27	VVIGMDVAASEFFR	K	S	0.997	55.8	26.2	16.5	55.8	0	2	0	0	2	1556.78	8481.05	9440100	240	253
Mudpit_Aged L3_4 Posterior NP IAF	Enolase 1, (Alpha), isoform CRA_a OS=Homo sapiens GN=ENO1 PE=2 SV=1	A0A024R4F1,P06733	ENO1	47170.2	9	9	27	YISPDQLADLYK	R	S	0.997	58.7	25	16.7	58.7	0	6	0	0	2	1425.73	8035.4	63376400	270	281
Mudpit_Aged L3_4 Posterior NP IAF	Monocyte differentiation antigen CD14 OS=Homo sapiens PE=2 SV=1	B2R888,F1C4A7,P08571	CD14	40076.6	5	10	12	AFPALTSLDLSDNPGLGER	R	G	0.997	94.6	26.8	18.9	94.6	0	1	1	0	2	1973	9072.91	25713600	192	210
Mudpit_Aged L3_4 Posterior NP IAF	Monocyte differentiation antigen CD14 OS=Homo sapiens PE=2 SV=1	B2R888,F1C4A7,P08571	CD14	40076.6	5	10	12	ELTLEDLK	K	I	0.99	43	26.7	25.2	33.6	0	1	0	0	2	960.525	5943.24	6297070	120	127
Mudpit_Aged L3_4 Posterior NP IAF	Monocyte differentiation antigen CD14 OS=Homo sapiens PE=2 SV=1	B2R888,F1C4A7,P08571	CD14	40076.6	5	10	12	FPAIQNLALR	K	N	0.997	40.2	25.9	15.5	40.2	0	1	0	0	2	1142.67	7207.34	15113100	221	230
Mudpit_Aged L3_4 Posterior NP IAF	Monocyte differentiation antigen CD14 OS=Homo sapiens PE=2 SV=1	B2R888,F1C4A7,P08571	CD14	40076.6	5	10	12	ITGTMPPLPLEATGLALSSLR	K	L	0.997	84.9	25	18.3	84.9	0	2	3	0	2	2154.18	9341.66	80810500	128	148
Mudpit_Aged L3_4 Posterior NP IAF	Monocyte differentiation antigen CD14 OS=Homo sapiens PE=2 SV=1	B2R888,F1C4A7,P08571	CD14	40076.6	5	10	12	LTVGAAQVPAQLLVGALR	R	V	0.997	86.7	25	29.3	75.8	0	2	1	0	2	1777.07	9116.37	101921000	94	111
Mudpit_Aged L3_4 Posterior NP IAF	Apolipoprotein A-IV OS=Homo sapiens GN=APOA4 PE=1 SV=3	P06727	APOA4	45399.4	24	40	177	ALVQQMEQLR	K	Q	0.997	63.5	28.2	26.6	53.9	0	11	0	0	2	1215.65	2853.28	218113000	317	326
Mudpit_Aged L3_4 Posterior NP IAF	Apolipoprotein A-IV OS=Homo sapiens GN=APOA4 PE=1 SV=3	P06727	APOA4	45399.4	24	40	177	EEIGKELEELR	K	A	0.997	56.8	26.5	16.6	56.8	0	6	4	0	2	1344.7	8384.86	66281500	100	110
Mudpit_Aged L3_4 Posterior NP IAF	Apolipoprotein A-IV OS=Homo sapiens GN=APOA4 PE=1 SV=3	P06727	APOA4	45399.4	24	40	177	ENADSLQASLRPHADELK	R	A	0.997	109	26.8	19.8	109	0	2	9	0	2	1993.99	6621.1	201513000	170	187
Mudpit_Aged L3_4 Posterior NP IAF	Apolipoprotein A-IV OS=Homo sapiens GN=APOA4 PE=1 SV=3	P06727	APOA4	45399.4	24	40	177	GNTEGLQK	R	S	0.989	34.2	26.9	21.9	27.5	0	1	0	0	2	846.432	1372.54	218066	280	287
Mudpit_Aged L3_4 Posterior NP IAF	Apolipoprotein A-IV OS=Homo sapiens GN=APOA4 PE=1 SV=3	P06727	APOA4	45399.4	24	40	177	IDQNVEELK	K	G	0.997	80.1	27.4	36	62.1	0	7	0	0	2	1087.56	2899.59	222034000	190	198
Mudpit_Aged L3_4 Posterior NP IAF	Apolipoprotein A-IV OS=Homo sapiens GN=APOA4 PE=1 SV=3	P06727	APOA4	45399.4	24	40	177	IDQTVEELR	K	R	0.997	61	28.2	16.8	61	0	4	0	0	2	1102.57	3906.11	28268700	212	220
Mudpit_Aged L3_4 Posterior NP IAF	Apolipoprotein A-IV OS=Homo sapiens GN=APOA4 PE=1 SV=3	P06727	APOA4	45399.4	24	40	177	IDQTVEELRR	K	S	0.997	46.5	26.7	22.9	39.5	0	1	1	0	2	1258.68	4056.54	46201600	212	221
Mudpit_Aged L3_4 Posterior NP IAF	Apolipoprotein A-IV OS=Homo sapiens GN=APOA4 PE=1 SV=3	P06727	APOA4	45399.4	24	40	177	ISASAEELR	R	Q	0.997	64.9	27.6	32.8	49.2	0	7	0	0	2	975.51	2548.42	104759000	256	264
Mudpit_Aged L3_4 Posterior NP IAF	Apolipoprotein A-IV OS=Homo sapiens GN=APOA4 PE=1 SV=3	P06727	APOA4	45399.4	24	40	177	LAPLAEDVR	R	G	0.997	43	25	15.7	43	0	3	0	0	2	983.552	3847.52	40805400	267	275
Mudpit_Aged L3_4 Posterior NP IAF	Apolipoprotein A-IV OS=Homo sapiens GN=APOA4 PE=1 SV=3	P06727	APOA4	45399.4	24	40	177	LEPYADQLR	R	T	0.997	50	28.2	31.7	34.4	0	5	0	0	2	1104.57	4073.55	725294000	135	143
Mudpit_Aged L3_4 Posterior NP IAF	Apolipoprotein A-IV OS=Homo sapiens GN=APOA4 PE=1 SV=3	P06727	APOA4	45399.4	24	40	177	LGEVNTYAGDLQK	K	K	0.997	94.9	26.1	18.9	94.9	0	7	0	0	2	1407.71	4613.01	74496100	66	78
Mudpit_Aged L3_4 Posterior NP IAF	Apolipoprotein A-IV OS=Homo sapiens GN=APOA4 PE=1 SV=3	P06727	APOA4	45399.4	24	40	177	LGPHAGDVEGHLSFLEK	K	D	0.997	72.8	26.8	17.6	72.8	0	3	5	4	2	1805.92	7655.61	257034000	329	345
Mudpit_Aged L3_4 Posterior NP IAF	Apolipoprotein A-IV OS=Homo sapiens GN=APOA4 PE=1 SV=3	P06727	APOA4	45399.4	24	40	177	LKEEIGKELEELR	K	A	0.997	62.5	25	18.9	60.5	0	2	12	5	2	1585.88	9743.73	47107200	98	110
Mudpit_Aged L3_4 Posterior NP IAF	Apolipoprotein A-IV OS=Homo sapiens GN=APOA4 PE=1 SV=3	P06727	APOA4	45399.4	24	40	177	LLPHANEVSQK	R	I	0.99	34	27.4	15.1	34	0	4	0	0	2	1235.67	2992.13	55533700	113	123
Mudpit_Aged L3_4 Posterior NP IAF	Apolipoprotein A-IV OS=Homo sapiens GN=APOA4 PE=1 SV=3	P06727	APOA4	45399.4	24	40	177	LNHQLEGLTFQMK	K	K	0.997	69.1	28.8	17.3	69.1	0	5	6	0	2	1558.8	8592.53	118443000	234	246
Mudpit_Aged L3_4 Posterior NP IAF	Apolipoprotein A-IV OS=Homo sapiens GN=APOA4 PE=1 SV=3	P06727	APOA4	45399.4	24	40	177	LTPYADEFK	R	V	0.997	52.4	25	16.3	52.4	0	5	0	0	2	1083.54	4632.63	104811000	201	209
Mudpit_Aged L3_4 Posterior NP IAF	Apolipoprotein A-IV OS=Homo sapiens GN=APOA4 PE=1 SV=3	P06727	APOA4	45399.4	24	40	177	LVPFATELHER	K	L	0.997	55.6	25.7	16.5	55.6	0	5	10	0	2	1311.71	8350.66	391797000	80	90
Mudpit_Aged L3_4 Posterior NP IAF	Apolipoprotein A-IV OS=Homo sapiens GN=APOA4 PE=1 SV=3	P06727	APOA4	45399.4	24	40	177	RVEPYGENFNK	R	A	0.994	34.4	26.6	15.2	34.4	0	2	1	0	2	1352.66	3677.1	71268400	306	316
Mudpit_Aged L3_4 Posterior NP IAF	Apolipoprotein A-IV OS=Homo sapiens GN=APOA4 PE=1 SV=3	P06727	APOA4	45399.4	24	40	177	SELTQQLNALFQDK	K	L	0.997	104	27.2	19.5	104	0	4	2	0	2	1634.84	9137.22	173750000	52	65
Mudpit_Aged L3_4 Posterior NP IAF	Apolipoprotein A-IV OS=Homo sapiens GN=APOA4 PE=1 SV=3	P06727	APOA4	45399.4	24	40	177	SLAELGGHLDQQVEEFR	K	R	0.997	117	25.9	20.3	117	0	5	5	0	2	1927.95	8111.54	234895000	288	304
Mudpit_Aged L3_4 Posterior NP IAF	Apolipoprotein A-IV OS=Homo sapiens GN=APOA4 PE=1 SV=3	P06727	APOA4	45399.4	24	40	177	SLAPYAQDTQEK	R	L	0.997	60.9	28.1	16.8	60.9	0	8	0	0	2	1350.65	2649.58	223720000	222	233
Mudpit_Aged L3_4 Posterior NP IAF	Apolipoprotein A-IV OS=Homo sapiens GN=APOA4 PE=1 SV=3	P06727	APOA4	45399.4	24	40	177	TQVNTQAEQLR	R	R	0.997	73.3	25.9	17.6	73.3	0	7	2	0	2	1287.67	2188.26	240955000	144	154
Mudpit_Aged L3_4 Posterior NP IAF	Apolipoprotein A-IV OS=Homo sapiens GN=APOA4 PE=1 SV=3	P06727	APOA4	45399.4	24	40	177	VEPYGENFNK	R	A	0.997	50.2	28.9	17.1	49.2	0	3	0	0	2	1196.56	3068.9	56505700	307	316
Mudpit_Aged L3_4 Posterior NP IAF	Apolipoprotein A-IV OS=Homo sapiens GN=APOA4 PE=1 SV=3	P06727	APOA4	45399.4	24	40	177	VNSFFSTFK	K	E	0.997	50.5	26.8	16.2	50.5	0	4	0	0	2	1076.54	6769.49	48035800	351	359
Mudpit_Aged L3_4 Posterior NP IAF	Platelet-derived growth factor receptor-like protein OS=Homo sapiens GN=PDGFRL PE=1 SV=1	Q15198	PDGFRL	41860.9	4	4	10	DERPVTIQDTWR	K	L	0.979	41.2	26.7	15.6	41.2	0	0	4	0	2	1515.76	5256.13	36007800	314	325
Mudpit_Aged L3_4 Posterior NP IAF	Platelet-derived growth factor receptor-like protein OS=Homo sapiens GN=PDGFRL PE=1 SV=1	Q15198	PDGFRL	41860.9	4	4	10	GELFVPSPSYFDVVYLNPDR	K	Q	0.997	108	26.2	19.8	108	0	1	0	0	2	2314.14	9349.65	6152680	171	190
Mudpit_Aged L3_4 Posterior NP IAF	Platelet-derived growth factor receptor-like protein OS=Homo sapiens GN=PDGFRL PE=1 SV=1	Q15198	PDGFRL	41860.9	4	4	10	IGWSYPAYLDTFK	R	D	0.997	60.6	26.4	16.8	60.6	0	2	0	0	2	1560.77	8998.75	16976000	101	113
Mudpit_Aged L3_4 Posterior NP IAF	Platelet-derived growth factor receptor-like protein OS=Homo sapiens GN=PDGFRL PE=1 SV=1	Q15198	PDGFRL	41860.9	4	4	10	TGSTYIFFTEK	K	G	0.997	62.2	26.9	16.9	62.2	0	3	0	0	2	1293.64	7494.8	22887100	160	170
Mudpit_Aged L3_4 Posterior NP IAF	Immunoglobulin alpha-2 heavy chain OS=Homo sapiens PE=1 SV=1	IGA2_HUMAN		0	3	3	8	DASGATFTWTPSSGK	?	?	0.997	91.9	25.9	18.7	91.9	0	3	0	0	2	1512.7	5987.73	33051200	0	0
Mudpit_Aged L3_4 Posterior NP IAF	Immunoglobulin alpha-2 heavy chain OS=Homo sapiens PE=1 SV=1	IGA2_HUMAN		0	3	3	8	EVQLVETGGGLIQPGGSLR	?	?	0.997	122	30.1	75.7	67.4	0	2	0	0	2	1910.03	7485.05	23669000	0	0
Mudpit_Aged L3_4 Posterior NP IAF	Immunoglobulin alpha-2 heavy chain OS=Homo sapiens PE=1 SV=1	IGA2_HUMAN		0	3	3	8	GTTVTVSSASPTSPK	?	?	0.997	71.2	27.3	17.4	71.2	0	3	0	0	2	1419.73	2446.07	11702700	0	0
Mudpit_Aged L3_4 Posterior NP IAF	von Willebrand factor OS=Homo sapiens GN=VWF PE=4 SV=1	L8E853,P04275	VWF	309251	4	5	6	LSEAEFEVLK	R	A	0.997	57.4	26.6	16.6	57.4	0	2	0	0	2	1164.61	6631.01	12026200	1288	1297
Mudpit_Aged L3_4 Posterior NP IAF	von Willebrand factor OS=Homo sapiens GN=VWF PE=4 SV=1	L8E853,P04275	VWF	309251	4	5	6	VTVFPIGIGDR	R	Y	0.997	39.2	26.8	15.4	39.2	0	1	0	0	2	1173.66	7765.42	5520000	1820	1830
Mudpit_Aged L3_4 Posterior NP IAF	von Willebrand factor OS=Homo sapiens GN=VWF PE=4 SV=1	L8E853,P04275	VWF	309251	4	5	6	YAGSQVASTSEVLK	K	Y	0.997	90.7	26.7	19.3	90.1	0	1	0	0	2	1439.74	4072.59	5447010	1349	1362
Mudpit_Aged L3_4 Posterior NP IAF	von Willebrand factor OS=Homo sapiens GN=VWF PE=4 SV=1	L8E853,P04275	VWF	309251	4	5	6	YLSDHSFLVSQGDR	R	E	0.997	71.4	26.1	17.5	71.4	0	1	1	0	2	1623.78	5468.19	20209800	1584	1597
Mudpit_Aged L3_4 Posterior NP IAF	Plasma kallikrein (Fragment) OS=Homo sapiens GN=KLKB1 PE=1 SV=1	H0YAC1,P03952	KLKB1	71369.7	8	9	16	DSVTGTLPK	K	V	0.997	54.2	27.9	16.4	54.2	0	2	0	0	2	917.494	2850.64	24325200	81	89
Mudpit_Aged L3_4 Posterior NP IAF	Plasma kallikrein (Fragment) OS=Homo sapiens GN=KLKB1 PE=1 SV=1	H0YAC1,P03952	KLKB1	71369.7	8	9	16	EIIIHQNYK	K	V	0.987	33.3	27.4	15.1	33.3	0	1	0	0	2	1157.63	3577	4315330	468	476
Mudpit_Aged L3_4 Posterior NP IAF	Plasma kallikrein (Fragment) OS=Homo sapiens GN=KLKB1 PE=1 SV=1	H0YAC1,P03952	KLKB1	71369.7	8	9	16	GEIQNILQK	K	V	0.994	37.4	26.2	22	30.8	0	3	0	0	2	1042.59	5457.46	40921200	529	537
Mudpit_Aged L3_4 Posterior NP IAF	Plasma kallikrein (Fragment) OS=Homo sapiens GN=KLKB1 PE=1 SV=1	H0YAC1,P03952	KLKB1	71369.7	8	9	16	IAYGTQGSSGYSLR	R	L	0.997	75.3	26.4	17.7	75.3	0	1	0	0	2	1459.72	4046.59	5632410	360	373
Mudpit_Aged L3_4 Posterior NP IAF	Plasma kallikrein (Fragment) OS=Homo sapiens GN=KLKB1 PE=1 SV=1	H0YAC1,P03952	KLKB1	71369.7	8	9	16	IYSGILNLSDITK	R	D	0.997	81.4	25.6	18.1	81.4	0	2	0	0	2	1436.8	8938.44	25475000	447	459
Mudpit_Aged L3_4 Posterior NP IAF	Plasma kallikrein (Fragment) OS=Homo sapiens GN=KLKB1 PE=1 SV=1	H0YAC1,P03952	KLKB1	71369.7	8	9	16	LCNTGDNSVCTTK	R	T	0.967	27.2	25	14.7	27.2	0	1	0	0	2	1471.6	1758.19	2609830	374	386
Mudpit_Aged L3_4 Posterior NP IAF	Plasma kallikrein (Fragment) OS=Homo sapiens GN=KLKB1 PE=1 SV=1	H0YAC1,P03952	KLKB1	71369.7	8	9	16	VAEYMDWILEK	K	T	0.997	50.5	25.2	16.2	50.5	0	4	0	0	2	1412.68	8301.15	103211000	614	624
Mudpit_Aged L3_4 Posterior NP IAF	Plasma kallikrein (Fragment) OS=Homo sapiens GN=KLKB1 PE=1 SV=1	H0YAC1,P03952	KLKB1	71369.7	8	9	16	YSPGGTPTAIK	K	V	0.997	48.5	28.1	16	48.5	0	2	0	0	2	1091.57	2626.68	79214600	170	180
Mudpit_Aged L3_4 Posterior NP IAF	Sex hormone-binding globulin OS=Homo sapiens GN=SHBG PE=1 SV=1	I3L145,P04278	SHBG	43780.6	5	6	9	DDWFMLGLR	K	D	0.997	51.8	25.9	16.2	51.8	0	3	0	0	2	1152.55	9257.35	39130000	93	101
Mudpit_Aged L3_4 Posterior NP IAF	Sex hormone-binding globulin OS=Homo sapiens GN=SHBG PE=1 SV=1	I3L145,P04278	SHBG	43780.6	5	6	9	IALGGLLFPASNLR	R	L	0.997	61.2	25	16.8	61.2	0	1	0	0	2	1441.85	9137.37	31288900	170	183
Mudpit_Aged L3_4 Posterior NP IAF	Sex hormone-binding globulin OS=Homo sapiens GN=SHBG PE=1 SV=1	I3L145,P04278	SHBG	43780.6	5	6	9	QAEISASAPTSLR	K	S	0.997	38.1	27.5	15.4	38.1	0	1	0	0	2	1330.7	3869.32	7261380	203	215
Mudpit_Aged L3_4 Posterior NP IAF	Sex hormone-binding globulin OS=Homo sapiens GN=SHBG PE=1 SV=1	I3L145,P04278	SHBG	43780.6	5	6	9	TWDPEGVIFYGDTNPK	R	D	0.997	100	25.7	19.3	100	0	3	0	0	2	1838.86	8245.1	21083700	77	92
Mudpit_Aged L3_4 Posterior NP IAF	Sex hormone-binding globulin OS=Homo sapiens GN=SHBG PE=1 SV=1	I3L145,P04278	SHBG	43780.6	5	6	9	VVLSSGSGPGLDLPLVLGLPLQLK	K	L	0.992	47.1	25	15.9	47.1	0	0	1	0	2	2372.42	9465.14	4104350	286	309
Mudpit_Aged L3_4 Posterior NP IAF	Keratin 1 OS=Homo sapiens GN=KRT1 PE=3 SV=1	H6VRF8,H6VRG0,H6VRG1,P04264	KRT1	66040.3	9	10	11	AEAESLYQSKYEELQITAGR	K	H	0.983	40.2	25.9	15.5	40.2	0	0	2	0	2	2286.12	6575.6	15192900	367	386
Mudpit_Aged L3_4 Posterior NP IAF	Keratin 1 OS=Homo sapiens GN=KRT1 PE=3 SV=1	H6VRF8,H6VRG0,H6VRG1,P04264	KRT1	66040.3	9	10	11	FLEQQNQVLQTK	R	W	0.997	80.7	32.3	18	80.7	0	1	0	0	2	1475.79	4306.58	4037870	200	211
Mudpit_Aged L3_4 Posterior NP IAF	Keratin 1 OS=Homo sapiens GN=KRT1 PE=3 SV=1	H6VRF8,H6VRG0,H6VRG1,P04264	KRT1	66040.3	9	10	11	GGGGGGYGSGGSSYGSGGGSYGSGGGGGGGR	R	G	0.997	160	25	23	160	0	1	1	0	2	2383.95	2271.9	7501730	519	549
Mudpit_Aged L3_4 Posterior NP IAF	Keratin 1 OS=Homo sapiens GN=KRT1 PE=3 SV=1	H6VRF8,H6VRG0,H6VRG1,P04264	KRT1	66040.3	9	10	11	GSYGSGGSSYGSGGGSYGSGGGGGGHGSYGSGSSSGGYR	R	G	0.997	75.1	25	17.7	75.1	0	0	1	0	2	3312.31	3058.52	8954660	550	588
Mudpit_Aged L3_4 Posterior NP IAF	Keratin 1 OS=Homo sapiens GN=KRT1 PE=3 SV=1	H6VRF8,H6VRG0,H6VRG1,P04264	KRT1	66040.3	9	10	11	QISNLQQSISDAEQR	K	G	0.98	31.5	27.4	15	31.5	0	1	0	0	2	1716.85	5377.58	1826500	418	432
Mudpit_Aged L3_4 Posterior NP IAF	Keratin 1 OS=Homo sapiens GN=KRT1 PE=3 SV=1	H6VRF8,H6VRG0,H6VRG1,P04264	KRT1	66040.3	9	10	11	SGGGFSSGSAGIINYQR	R	R	0.997	75.4	25.8	17.7	75.4	0	1	0	0	2	1657.79	5113.54	12630200	13	29
Mudpit_Aged L3_4 Posterior NP IAF	Keratin 1 OS=Homo sapiens GN=KRT1 PE=3 SV=1	H6VRF8,H6VRG0,H6VRG1,P04264	KRT1	66040.3	9	10	11	SLDLDSIIAEVK	R	A	0.997	70.5	27.3	17.4	70.5	0	1	0	0	2	1302.72	9081.02	35822400	344	355
Mudpit_Aged L3_4 Posterior NP IAF	Keratin 1 OS=Homo sapiens GN=KRT1 PE=3 SV=1	H6VRF8,H6VRG0,H6VRG1,P04264	KRT1	66040.3	9	10	11	TLLEGEESR	R	M	0.987	33.7	28.1	15.1	33.7	0	1	0	0	2	1033.52	2514.84	4048210	484	492
Mudpit_Aged L3_4 Posterior NP IAF	Keratin 1 OS=Homo sapiens GN=KRT1 PE=3 SV=1	H6VRF8,H6VRG0,H6VRG1,P04264	KRT1	66040.3	9	10	11	TNAENEFVTIKK	R	D	0.997	48.7	26.3	16	48.7	0	1	0	0	2	1393.73	3665.59	2904130	278	289
Mudpit_Aged L3_4 Posterior NP IAF	Protein disulfide-isomerase OS=Homo sapiens GN=P4HB PE=3 SV=1	A0A024R8S5,P07237	P4HB	57118.1	5	5	5	LITLEEEMTK	R	Y	0.986	30.8	26.6	14.9	30.8	0	1	0	0	2	1206.63	6099.28	8689620	317	326
Mudpit_Aged L3_4 Posterior NP IAF	Protein disulfide-isomerase OS=Homo sapiens GN=P4HB PE=3 SV=1	A0A024R8S5,P07237	P4HB	57118.1	5	5	5	MDSTANEVEAVK	K	V	0.997	69.4	25	17.3	69.4	0	1	0	0	2	1309.59	2239.43	3063580	425	436
Mudpit_Aged L3_4 Posterior NP IAF	Protein disulfide-isomerase OS=Homo sapiens GN=P4HB PE=3 SV=1	A0A024R8S5,P07237	P4HB	57118.1	5	5	5	NFEDVAFDEK	K	K	0.997	52.9	25	16.3	52.9	0	1	0	0	2	1213.54	5642.55	3850550	376	385
Mudpit_Aged L3_4 Posterior NP IAF	Protein disulfide-isomerase OS=Homo sapiens GN=P4HB PE=3 SV=1	A0A024R8S5,P07237	P4HB	57118.1	5	5	5	SNFAEALAAHK	K	Y	0.992	51.3	26.6	16.2	51.3	0	0	1	0	2	1158.59	4128.44	4580130	32	42
Mudpit_Aged L3_4 Posterior NP IAF	Protein disulfide-isomerase OS=Homo sapiens GN=P4HB PE=3 SV=1	A0A024R8S5,P07237	P4HB	57118.1	5	5	5	VDATEESDLAQQYGVR	K	G	0.997	135	25	21.5	135	0	1	0	0	2	1780.83	5707.83	3874520	82	97
Mudpit_Aged L3_4 Posterior NP IAF	cDNA, FLJ94361, highly similar to Homo sapiens serine (or cysteine) proteinase inhibitor, clade A(alpha-1 antiproteinase, antitrypsin), member 6 (SERPINA6), mRNA OS=Homo sapiens PE=2 SV=1	B2R9F2,P08185	SERPINA6	45142.1	5	5	18	EENFYVDETTVVK	R	V	0.997	52.7	25	16.3	52.7	0	6	0	0	2	1572.74	6083.57	28717100	218	230
Mudpit_Aged L3_4 Posterior NP IAF	cDNA, FLJ94361, highly similar to Homo sapiens serine (or cysteine) proteinase inhibitor, clade A(alpha-1 antiproteinase, antitrypsin), member 6 (SERPINA6), mRNA OS=Homo sapiens PE=2 SV=1	B2R9F2,P08185	SERPINA6	45142.1	5	5	18	GTWTQPFDLASTR	K	E	0.997	49.7	27	16.1	49.7	0	3	0	0	2	1479.72	7683.69	22087000	205	217
Mudpit_Aged L3_4 Posterior NP IAF	cDNA, FLJ94361, highly similar to Homo sapiens serine (or cysteine) proteinase inhibitor, clade A(alpha-1 antiproteinase, antitrypsin), member 6 (SERPINA6), mRNA OS=Homo sapiens PE=2 SV=1	B2R9F2,P08185	SERPINA6	45142.1	5	5	18	HLVALSPK	K	K	0.99	47.2	25	22.8	40.3	0	2	0	0	2	864.53	4877.38	19696700	53	60
Mudpit_Aged L3_4 Posterior NP IAF	cDNA, FLJ94361, highly similar to Homo sapiens serine (or cysteine) proteinase inhibitor, clade A(alpha-1 antiproteinase, antitrypsin), member 6 (SERPINA6), mRNA OS=Homo sapiens PE=2 SV=1	B2R9F2,P08185	SERPINA6	45142.1	5	5	18	MNTVIAALSR	K	D	0.997	63.3	27.7	17	63.3	0	3	0	0	2	1091.59	5144.46	16796600	273	282
Mudpit_Aged L3_4 Posterior NP IAF	cDNA, FLJ94361, highly similar to Homo sapiens serine (or cysteine) proteinase inhibitor, clade A(alpha-1 antiproteinase, antitrypsin), member 6 (SERPINA6), mRNA OS=Homo sapiens PE=2 SV=1	B2R9F2,P08185	SERPINA6	45142.1	5	5	18	WSAGLTSSQVDLYIPK	R	V	0.997	133	26.8	21.3	133	0	4	0	0	2	1764.92	8781.22	17663400	288	303
Mudpit_Aged L3_4 Posterior NP IAF	Serum paraoxonase/lactonase 3 OS=Homo sapiens GN=PON3 PE=1 SV=3	Q15166	PON3	39608.1	2	2	3	IFLMDLNEQNPR	K	A	0.997	77.2	26.6	17.8	77.2	0	1	0	0	2	1489.75	7720.93	3416940	85	96
Mudpit_Aged L3_4 Posterior NP IAF	Serum paraoxonase/lactonase 3 OS=Homo sapiens GN=PON3 PE=1 SV=3	Q15166	PON3	39608.1	2	2	3	YVYVADVAAK	K	N	0.99	30.5	25.6	14.9	30.5	0	2	0	0	2	1098.58	4094.7	10606400	233	242
Mudpit_Aged L3_4 Posterior NP IAF	Uncharacterized protein OS=Homo sapiens PE=2 SV=1	Q6GMV8		24909.1	2	2	8	FSGSNSGNTATLTISR	R	V	0.997	144	26.2	22	144	0	4	0	0	2	1612.79	4033.6	25462100	80	95
Mudpit_Aged L3_4 Posterior NP IAF	Uncharacterized protein OS=Homo sapiens PE=2 SV=1	Q6GMV8		24909.1	2	2	8	LTVLSQPK	K	A	0.99	49.9	25.5	16.1	49.9	0	4	0	0	2	885.54	3082.41	92788600	125	132
Mudpit_Aged L3_4 Posterior NP IAF	C4b-binding protein beta chain OS=Homo sapiens GN=C4BPB PE=1 SV=1	P20851	C4BPB	28357.2	2	3	4	ALLAFQESK	K	N	0.993	35.5	27.3	15.2	35.5	0	1	0	0	2	1006.56	5559.53	4625630	205	213
Mudpit_Aged L3_4 Posterior NP IAF	C4b-binding protein beta chain OS=Homo sapiens GN=C4BPB PE=1 SV=1	P20851	C4BPB	28357.2	2	3	4	ESGMTMEELK	K	Y	0.997	72.5	25	17.5	72.5	0	3	0	0	2	1154.51	2433.62	18667200	228	237
Mudpit_Aged L3_4 Posterior NP IAF	Immunoglobulin heavy constant mu (Fragment) OS=Homo sapiens GN=IGHM PE=1 SV=1	A0A1B0GUU9_HUMAN,P01871	IGHM	49305.7	15	21	181	DGFFGNPR	R	K	0.99	44	25	15.7	44	0	8	0	0	2	909.421	4698.38	235859000	121	128
Mudpit_Aged L3_4 Posterior NP IAF	Immunoglobulin heavy constant mu (Fragment) OS=Homo sapiens GN=IGHM PE=1 SV=1	A0A1B0GUU9_HUMAN,P01871	IGHM	49305.7	15	21	181	DVMQGTDEHVVCK	K	V	0.961	34.4	25	15.1	34.4	0	0	1	0	2	1518.66	4212.69	10743000	77	89
Mudpit_Aged L3_4 Posterior NP IAF	Immunoglobulin heavy constant mu (Fragment) OS=Homo sapiens GN=IGHM PE=1 SV=1	A0A1B0GUU9_HUMAN,P01871	IGHM	49305.7	15	21	181	ESGPTTYK	K	V	0.99	66.8	25	29.5	54.5	0	2	0	0	2	882.42	1487.44	1079830	170	177
Mudpit_Aged L3_4 Posterior NP IAF	Immunoglobulin heavy constant mu (Fragment) OS=Homo sapiens GN=IGHM PE=1 SV=1	A0A1B0GUU9_HUMAN,P01871	IGHM	49305.7	15	21	181	FTCTVTHTDLPSPLK	R	Q	0.979	40.5	27.4	15.5	40.5	0	0	2	0	2	1717.85	7746	19397300	301	315
Mudpit_Aged L3_4 Posterior NP IAF	Immunoglobulin heavy constant mu (Fragment) OS=Homo sapiens GN=IGHM PE=1 SV=1	A0A1B0GUU9_HUMAN,P01871	IGHM	49305.7	15	21	181	GQPLSPEK	R	Y	0.985	31.7	25	15	31.7	0	2	0	0	2	855.457	1689.76	5214780	369	376
Mudpit_Aged L3_4 Posterior NP IAF	Immunoglobulin heavy constant mu (Fragment) OS=Homo sapiens GN=IGHM PE=1 SV=1	A0A1B0GUU9_HUMAN,P01871	IGHM	49305.7	15	21	181	GVALHRPDVYLLPPAR	K	E	0.994	56.4	25	16.5	56.4	0	0	15	6	2	1774.01	9536.06	512500000	323	338
Mudpit_Aged L3_4 Posterior NP IAF	Immunoglobulin heavy constant mu (Fragment) OS=Homo sapiens GN=IGHM PE=1 SV=1	A0A1B0GUU9_HUMAN,P01871	IGHM	49305.7	15	21	181	LICQATGFSPR	K	Q	0.997	62.3	25.8	16.9	62.3	0	2	0	0	2	1250.62	5521.96	17146600	132	142
Mudpit_Aged L3_4 Posterior NP IAF	Immunoglobulin heavy constant mu (Fragment) OS=Homo sapiens GN=IGHM PE=1 SV=1	A0A1B0GUU9_HUMAN,P01871	IGHM	49305.7	15	21	181	NVPLPVIAELPPK	K	V	0.997	72.3	25	17.5	72.3	0	22	8	0	2	1386.84	8658.55	2168720000	100	112
Mudpit_Aged L3_4 Posterior NP IAF	Immunoglobulin heavy constant mu (Fragment) OS=Homo sapiens GN=IGHM PE=1 SV=1	A0A1B0GUU9_HUMAN,P01871	IGHM	49305.7	15	21	181	QIQVSWLR	R	E	0.99	42.7	28.2	22.8	35.5	0	6	0	0	2	1029.58	6711.91	191980000	143	150
Mudpit_Aged L3_4 Posterior NP IAF	Immunoglobulin heavy constant mu (Fragment) OS=Homo sapiens GN=IGHM PE=1 SV=1	A0A1B0GUU9_HUMAN,P01871	IGHM	49305.7	15	21	181	QVGSGVTTDQVQAEAK	K	E	0.997	129	26.3	21.1	129	0	26	3	0	2	1617.81	2627.09	1861940000	154	169
Mudpit_Aged L3_4 Posterior NP IAF	Immunoglobulin heavy constant mu (Fragment) OS=Homo sapiens GN=IGHM PE=1 SV=1	A0A1B0GUU9_HUMAN,P01871	IGHM	49305.7	15	21	181	VFAIPPSFASIFLTK	R	S	0.993	63.6	25	17	63.6	0	0	1	0	2	1637.93	9417.21	9726370	224	238
Mudpit_Aged L3_4 Posterior NP IAF	Immunoglobulin heavy constant mu (Fragment) OS=Homo sapiens GN=IGHM PE=1 SV=1	A0A1B0GUU9_HUMAN,P01871	IGHM	49305.7	15	21	181	VSVFVPPR	K	D	0.99	45.1	27.8	15.8	45.1	0	7	0	0	2	900.53	4873.74	703830000	113	120
Mudpit_Aged L3_4 Posterior NP IAF	Immunoglobulin heavy constant mu (Fragment) OS=Homo sapiens GN=IGHM PE=1 SV=1	A0A1B0GUU9_HUMAN,P01871	IGHM	49305.7	15	21	181	VTSTLTIK	K	E	0.99	42.4	25	16.5	41.6	0	7	0	0	2	862.524	2743.44	46299900	178	185
Mudpit_Aged L3_4 Posterior NP IAF	Immunoglobulin heavy constant mu (Fragment) OS=Homo sapiens GN=IGHM PE=1 SV=1	A0A1B0GUU9_HUMAN,P01871	IGHM	49305.7	15	21	181	YAATSQVLLPSK	K	D	0.997	95.7	25.5	19	95.7	0	7	0	0	2	1277.71	4880.58	387885000	65	76
Mudpit_Aged L3_4 Posterior NP IAF	Immunoglobulin heavy constant mu (Fragment) OS=Homo sapiens GN=IGHM PE=1 SV=1	A0A1B0GUU9_HUMAN,P01871	IGHM	49305.7	15	21	181	YVTSAPMPEPQAPGR	K	Y	0.997	79	26.4	17.9	79	0	49	7	0	2	1616.77	3974.27	1658080000	377	391
Mudpit_Aged L3_4 Posterior NP IAF	Inter-alpha-trypsin inhibitor heavy chain H5 OS=Homo sapiens GN=ITIH5 PE=1 SV=2	C9J2H1,Q86UX2	ITIH5	104579	7	7	9	AAFFLSYEELLQR	K	R	0.997	59.7	27.3	16.7	59.7	0	1	0	0	2	1586.82	9270.17	10350300	153	165
Mudpit_Aged L3_4 Posterior NP IAF	Inter-alpha-trypsin inhibitor heavy chain H5 OS=Homo sapiens GN=ITIH5 PE=1 SV=2	C9J2H1,Q86UX2	ITIH5	104579	7	7	9	IDYPPSSVVQATK	R	T	0.995	35.6	27.2	15.2	35.6	0	1	0	0	2	1404.74	4802.85	4515690	488	500
Mudpit_Aged L3_4 Posterior NP IAF	Inter-alpha-trypsin inhibitor heavy chain H5 OS=Homo sapiens GN=ITIH5 PE=1 SV=2	C9J2H1,Q86UX2	ITIH5	104579	7	7	9	IYNGEEQIDCWFAR	K	N	0.997	39.8	25	15.5	39.8	0	1	0	0	2	1801.79	8291.76	3360130	895	908
Mudpit_Aged L3_4 Posterior NP IAF	Inter-alpha-trypsin inhibitor heavy chain H5 OS=Homo sapiens GN=ITIH5 PE=1 SV=2	C9J2H1,Q86UX2	ITIH5	104579	7	7	9	LSLENCGLTR	K	R	0.997	48.8	26.6	16	48.8	0	1	0	0	2	1163.57	4844.18	9493400	450	459
Mudpit_Aged L3_4 Posterior NP IAF	Inter-alpha-trypsin inhibitor heavy chain H5 OS=Homo sapiens GN=ITIH5 PE=1 SV=2	C9J2H1,Q86UX2	ITIH5	104579	7	7	9	NVVFVLDSSASMVGTK	K	L	0.997	42.3	27	15.6	42.3	0	2	0	0	2	1653.85	8250.12	6700430	295	310
Mudpit_Aged L3_4 Posterior NP IAF	Inter-alpha-trypsin inhibitor heavy chain H5 OS=Homo sapiens GN=ITIH5 PE=1 SV=2	C9J2H1,Q86UX2	ITIH5	104579	7	7	9	SYLEITPSR	R	V	0.997	47.2	26.7	16	47.2	0	1	0	0	2	1065.56	4559.31	15692400	754	762
Mudpit_Aged L3_4 Posterior NP IAF	Inter-alpha-trypsin inhibitor heavy chain H5 OS=Homo sapiens GN=ITIH5 PE=1 SV=2	C9J2H1,Q86UX2	ITIH5	104579	7	7	9	TPLLSDIR	R	I	0.99	42	26.8	27.6	30	0	2	0	0	2	914.531	5382.7	42241100	480	487
Mudpit_Aged L3_4 Posterior NP IAF	Thrombospondin 1, isoform CRA_a OS=Homo sapiens GN=THBS1 PE=4 SV=1	A0A024R9Q1,P07996	THBS1	129382	13	13	21	AGTLDLSLTVQGK	K	Q	0.997	43.8	26.1	15.7	43.8	0	2	0	0	2	1302.73	6385.66	9378750	125	137
Mudpit_Aged L3_4 Posterior NP IAF	Thrombospondin 1, isoform CRA_a OS=Homo sapiens GN=THBS1 PE=4 SV=1	A0A024R9Q1,P07996	THBS1	129382	13	13	21	AQGYSGLSVK	R	V	0.957	25.9	26	14.6	25.9	0	1	0	0	2	1009.53	2818.97	7708300	1055	1064
Mudpit_Aged L3_4 Posterior NP IAF	Thrombospondin 1, isoform CRA_a OS=Homo sapiens GN=THBS1 PE=4 SV=1	A0A024R9Q1,P07996	THBS1	129382	13	13	21	FQDLVDAVR	K	A	0.995	39.9	28.3	23.1	32.3	0	1	0	0	2	1062.56	4926.34	6910950	75	83
Mudpit_Aged L3_4 Posterior NP IAF	Thrombospondin 1, isoform CRA_a OS=Homo sapiens GN=THBS1 PE=4 SV=1	A0A024R9Q1,P07996	THBS1	129382	13	13	21	FVFGTTPEDILR	R	N	0.997	68	27.4	17.3	68	0	3	0	0	2	1394.73	8951.85	73580700	217	228
Mudpit_Aged L3_4 Posterior NP IAF	Thrombospondin 1, isoform CRA_a OS=Homo sapiens GN=THBS1 PE=4 SV=1	A0A024R9Q1,P07996	THBS1	129382	13	13	21	GGVNDNFQGVLQNVR	K	F	0.989	37.3	27.1	15.3	37.3	0	1	0	0	2	1616.81	7191.38	3494480	202	216
Mudpit_Aged L3_4 Posterior NP IAF	Thrombospondin 1, isoform CRA_a OS=Homo sapiens GN=THBS1 PE=4 SV=1	A0A024R9Q1,P07996	THBS1	129382	13	13	21	GTLLALER	R	K	0.973	33.5	28.3	15.3	33.4	0	1	0	0	2	872.52	5734.63	2972970	102	109
Mudpit_Aged L3_4 Posterior NP IAF	Thrombospondin 1, isoform CRA_a OS=Homo sapiens GN=THBS1 PE=4 SV=1	A0A024R9Q1,P07996	THBS1	129382	13	13	21	GTSQNDPNWVVR	K	H	0.997	82	25	18.1	82	0	2	0	0	2	1372.66	3874.47	7667240	969	980
Mudpit_Aged L3_4 Posterior NP IAF	Thrombospondin 1, isoform CRA_a OS=Homo sapiens GN=THBS1 PE=4 SV=1	A0A024R9Q1,P07996	THBS1	129382	13	13	21	IEDANLIPPVPDDKFQDLVDAVR	R	A	0.949	33.3	25.9	15.1	33.3	0	0	1	0	2	2579.34	9569.16	4478930	61	83
Mudpit_Aged L3_4 Posterior NP IAF	Thrombospondin 1, isoform CRA_a OS=Homo sapiens GN=THBS1 PE=4 SV=1	A0A024R9Q1,P07996	THBS1	129382	13	13	21	IMADSGPIYDK	K	T	0.997	44.2	25	15.8	44.2	0	3	0	0	2	1225.58	2865.09	11861700	1131	1141
Mudpit_Aged L3_4 Posterior NP IAF	Thrombospondin 1, isoform CRA_a OS=Homo sapiens GN=THBS1 PE=4 SV=1	A0A024R9Q1,P07996	THBS1	129382	13	13	21	NALWHTGNTPGQVR	R	T	0.966	35.8	27.2	15.2	35.8	0	1	0	0	2	1550.78	5619.33	5123700	1078	1091
Mudpit_Aged L3_4 Posterior NP IAF	Thrombospondin 1, isoform CRA_a OS=Homo sapiens GN=THBS1 PE=4 SV=1	A0A024R9Q1,P07996	THBS1	129382	13	13	21	QVTQSYWDTNPTR	K	A	0.997	61.6	25	16.9	61.6	0	2	0	0	2	1595.74	4306.31	10001200	1042	1054
Mudpit_Aged L3_4 Posterior NP IAF	Thrombospondin 1, isoform CRA_a OS=Homo sapiens GN=THBS1 PE=4 SV=1	A0A024R9Q1,P07996	THBS1	129382	13	13	21	TIVTTLQDSIR	R	K	0.997	81.6	26.8	18.1	81.6	0	2	0	0	2	1246.7	6778.03	37064000	289	299
Mudpit_Aged L3_4 Posterior NP IAF	Thrombospondin 1, isoform CRA_a OS=Homo sapiens GN=THBS1 PE=4 SV=1	A0A024R9Q1,P07996	THBS1	129382	13	13	21	VTEENKELANELR	K	R	0.983	47.8	33.7	16	47.8	0	0	1	0	2	1544.79	5709.72	5434270	301	313
Mudpit_Aged L3_4 Posterior NP IAF	GCT-A4 light chain variable region (Fragment) OS=Homo sapiens PE=2 SV=1	A0A0X9T7V9		11845.8	2	3	6	DIVMTQSPGTLSLSPGER	-	A	0.997	55	26.5	16.4	55	0	2	0	0	2	1903.94	5243.54	7758130	1	18
Mudpit_Aged L3_4 Posterior NP IAF	GCT-A4 light chain variable region (Fragment) OS=Homo sapiens PE=2 SV=1	A0A0X9T7V9		11845.8	2	3	6	FSGSGSGTDFTLTISR	R	L	0.997	136	26.3	27.3	130	0	7	0	0	2	1632.79	6900.62	105650000	63	78
Mudpit_Aged L3_4 Posterior NP IAF	GCT-A4 light chain variable region (Fragment) OS=Homo sapiens PE=2 SV=1	A0A0X9T7V9		11845.8	2	3	6	LLIYGASTR	R	A	0.997	44.2	25	16.7	43.3	0	4	0	0	2	993.573	4652.19	92056200	47	55
Mudpit_Aged L3_4 Posterior NP IAF	Immunoglobulin heavy constant gamma 4 (Fragment) OS=Homo sapiens GN=IGHG4 PE=1 SV=1	A0A286YFJ8_HUMAN,P01861	IGHG4	35939.5	2	4	24	EPQVYTLPPSQEEMTK	R	N	0.997	66.6	25.4	17.2	66.6	0	18	0	0	2	1876.9	5526.77	252446000	225	240
Mudpit_Aged L3_4 Posterior NP IAF	Immunoglobulin heavy constant gamma 4 (Fragment) OS=Homo sapiens GN=IGHG4 PE=1 SV=1	A0A286YFJ8_HUMAN,P01861	IGHG4	35939.5	2	4	24	TTPPVLDSDGSFFLYSR	K	L	0.997	84.7	26.4	20.1	82.9	0	4	2	0	2	1901.93	9014.57	623200000	273	289
Mudpit_Aged L3_4 Posterior NP IAF	Serpin peptidase inhibitor, clade A (Alpha-1 antiproteinase, antitrypsin), member 10, isoform CRA_b OS=Homo sapiens GN=SERPINA10 PE=3 SV=1	A0A024R6I6,G3V2W1,Q9UK55	SERPINA10	50708.7	8	9	12	ETSNFGFSLLR	K	K	0.997	53.1	25.1	16.3	53.1	0	1	0	0	2	1270.64	8499.15	5097660	78	88
Mudpit_Aged L3_4 Posterior NP IAF	Serpin peptidase inhibitor, clade A (Alpha-1 antiproteinase, antitrypsin), member 10, isoform CRA_b OS=Homo sapiens GN=SERPINA10 PE=3 SV=1	A0A024R6I6,G3V2W1,Q9UK55	SERPINA10	50708.7	8	9	12	IFSPFADLSELSATGR	R	N	0.997	109	26.5	19.8	109	0	1	0	0	2	1710.87	9209.58	21170700	360	375
Mudpit_Aged L3_4 Posterior NP IAF	Serpin peptidase inhibitor, clade A (Alpha-1 antiproteinase, antitrypsin), member 10, isoform CRA_b OS=Homo sapiens GN=SERPINA10 PE=3 SV=1	A0A024R6I6,G3V2W1,Q9UK55	SERPINA10	50708.7	8	9	12	LFDEINPETK	K	L	0.997	43.1	26.5	15.7	43.1	0	3	0	0	2	1205.61	5293.58	36743300	220	229
Mudpit_Aged L3_4 Posterior NP IAF	Serpin peptidase inhibitor, clade A (Alpha-1 antiproteinase, antitrypsin), member 10, isoform CRA_b OS=Homo sapiens GN=SERPINA10 PE=3 SV=1	A0A024R6I6,G3V2W1,Q9UK55	SERPINA10	50708.7	8	9	12	NMEVFFPK	R	F	0.987	30.5	25	14.9	30.5	0	1	0	0	2	1027.49	5689.27	4815230	332	339
Mudpit_Aged L3_4 Posterior NP IAF	Serpin peptidase inhibitor, clade A (Alpha-1 antiproteinase, antitrypsin), member 10, isoform CRA_b OS=Homo sapiens GN=SERPINA10 PE=3 SV=1	A0A024R6I6,G3V2W1,Q9UK55	SERPINA10	50708.7	8	9	12	TVIEVDER	R	G	0.99	50.4	28	36.6	30	0	2	0	0	2	960.5	2685.49	23871400	386	393
Mudpit_Aged L3_4 Posterior NP IAF	Serpin peptidase inhibitor, clade A (Alpha-1 antiproteinase, antitrypsin), member 10, isoform CRA_b OS=Homo sapiens GN=SERPINA10 PE=3 SV=1	A0A024R6I6,G3V2W1,Q9UK55	SERPINA10	50708.7	8	9	12	VVQAPKEEEEDEQEASEEK	R	A	0.997	66.5	25	17.2	66.5	0	0	1	0	2	2202.99	2151.1	2957050	41	59
Mudpit_Aged L3_4 Posterior NP IAF	Serpin peptidase inhibitor, clade A (Alpha-1 antiproteinase, antitrypsin), member 10, isoform CRA_b OS=Homo sapiens GN=SERPINA10 PE=3 SV=1	A0A024R6I6,G3V2W1,Q9UK55	SERPINA10	50708.7	8	9	12	YEMHELLR	K	Q	0.99	39.3	27.5	15.5	39.3	0	1	1	0	2	1090.54	4178.09	19784400	346	353
Mudpit_Aged L3_4 Posterior NP IAF	Serpin peptidase inhibitor, clade A (Alpha-1 antiproteinase, antitrypsin), member 10, isoform CRA_b OS=Homo sapiens GN=SERPINA10 PE=3 SV=1	A0A024R6I6,G3V2W1,Q9UK55	SERPINA10	50708.7	8	9	12	YFDTECVPMNFR	R	N	0.971	25.9	25	14.6	25.9	0	1	0	0	2	1579.66	7202.74	3857560	185	196
Mudpit_Aged L3_4 Posterior NP IAF	Procollagen C-endopeptidase enhancer OS=Homo sapiens GN=PCOLCE PE=4 SV=1	A4D2D2,Q15113	PCOLCE	47972.5	5	7	14	GESGYVASEGFPNLYPPNK	K	E	0.997	59.6	25.8	16.7	59.6	0	6	1	0	2	2025.96	7060.41	36169900	43	61
Mudpit_Aged L3_4 Posterior NP IAF	Procollagen C-endopeptidase enhancer OS=Homo sapiens GN=PCOLCE PE=4 SV=1	A4D2D2,Q15113	PCOLCE	47972.5	5	7	14	GVSYLLMGQVEENR	K	G	0.997	77.5	25.7	17.8	77.5	0	1	0	0	2	1610.78	6140.94	1990530	395	408
Mudpit_Aged L3_4 Posterior NP IAF	Procollagen C-endopeptidase enhancer OS=Homo sapiens GN=PCOLCE PE=4 SV=1	A4D2D2,Q15113	PCOLCE	47972.5	5	7	14	TGGLDLPSPPTGASLK	K	F	0.997	40.6	25.2	17.1	39	0	3	0	0	2	1510.81	6810.7	13819100	366	381
Mudpit_Aged L3_4 Posterior NP IAF	Procollagen C-endopeptidase enhancer OS=Homo sapiens GN=PCOLCE PE=4 SV=1	A4D2D2,Q15113	PCOLCE	47972.5	5	7	14	YDALEVFAGSGTSGQR	R	L	0.997	66.6	25.8	17.2	66.6	0	1	1	0	2	1657.78	6732.61	56450700	92	107
Mudpit_Aged L3_4 Posterior NP IAF	Procollagen C-endopeptidase enhancer OS=Homo sapiens GN=PCOLCE PE=4 SV=1	A4D2D2,Q15113	PCOLCE	47972.5	5	7	14	YDSVSVFNGAVSDDSR	R	R	0.997	102	25	19.4	102	0	1	0	0	2	1717.77	5897.15	15037200	215	230
Mudpit_Aged L3_4 Posterior NP IAF	MS-C1 light chain variable region (Fragment) OS=Homo sapiens PE=2 SV=1	A0A109PW33		11796.6	2	5	20	DIQMTQSPSSLSASVGDR	-	V	0.997	120	25	20.5	120	0	15	3	0	2	1894.88	5010.64	135684000	1	18
Mudpit_Aged L3_4 Posterior NP IAF	MS-C1 light chain variable region (Fragment) OS=Homo sapiens PE=2 SV=1	A0A109PW33		11796.6	2	5	20	LLIYDASNLK	K	T	0.981	29.5	25.8	24.3	20.1	0	2	0	0	2	1149.65	6604.82	10856300	46	55
Mudpit_Aged L3_4 Posterior NP IAF	N-acetylmuramoyl-L-alanine amidase OS=Homo sapiens GN=PGLYRP2 PE=1 SV=1	Q96PD5	PGLYRP2	62217.9	6	10	26	AGLLRPDYALLGHR	R	Q	0.993	53.9	25	16.4	53.9	0	0	2	1	2	1551.88	8353.74	20693000	510	523
Mudpit_Aged L3_4 Posterior NP IAF	N-acetylmuramoyl-L-alanine amidase OS=Homo sapiens GN=PGLYRP2 PE=1 SV=1	Q96PD5	PGLYRP2	62217.9	6	10	26	DGSPDVTTADIGANTPDATK	R	G	0.997	117	25	20.3	117	0	6	4	0	2	1945.9	4862.06	49508900	175	194
Mudpit_Aged L3_4 Posterior NP IAF	N-acetylmuramoyl-L-alanine amidase OS=Homo sapiens GN=PGLYRP2 PE=1 SV=1	Q96PD5	PGLYRP2	62217.9	6	10	26	EYGVVLAPDGSTVAVEPLLAGLEAGLQGR	K	R	0.997	102	25	19.4	102	0	2	1	0	2	2881.53	9483.25	52612000	107	135
Mudpit_Aged L3_4 Posterior NP IAF	N-acetylmuramoyl-L-alanine amidase OS=Homo sapiens GN=PGLYRP2 PE=1 SV=1	Q96PD5	PGLYRP2	62217.9	6	10	26	GSQTQSHPDLGTEGCWDQLSAPR	R	T	0.997	79.4	25	18	79.4	0	1	0	0	2	2528.11	5902.63	9227000	234	256
Mudpit_Aged L3_4 Posterior NP IAF	N-acetylmuramoyl-L-alanine amidase OS=Homo sapiens GN=PGLYRP2 PE=1 SV=1	Q96PD5	PGLYRP2	62217.9	6	10	26	TFTLLDPK	R	A	0.99	52	27.3	16.6	51.7	0	6	0	0	2	934.525	6205.35	77178600	257	264
Mudpit_Aged L3_4 Posterior NP IAF	N-acetylmuramoyl-L-alanine amidase OS=Homo sapiens GN=PGLYRP2 PE=1 SV=1	Q96PD5	PGLYRP2	62217.9	6	10	26	VINLPLDSMAAPWETGDTFPDVVAIAPDVR	R	A	0.997	125	25	20.8	125	0	0	3	0	2	3209.62	9432.5	22121400	137	166
Mudpit_Aged L3_4 Posterior NP IAF	Polymeric immunoglobulin receptor OS=Homo sapiens GN=PIGR PE=1 SV=4	P01833	PIGR	83283.4	3	3	3	DGSFSVVITGLR	K	K	0.997	50.7	26.5	16.2	50.7	0	1	0	0	2	1250.67	8128.76	3753970	305	316
Mudpit_Aged L3_4 Posterior NP IAF	Polymeric immunoglobulin receptor OS=Homo sapiens GN=PIGR PE=1 SV=4	P01833	PIGR	83283.4	3	3	3	LSDAGQYLCQAGDDSNSNK	R	K	0.997	81.7	25	18.1	81.7	0	1	0	0	2	2043.86	4274.85	1831380	212	230
Mudpit_Aged L3_4 Posterior NP IAF	Polymeric immunoglobulin receptor OS=Homo sapiens GN=PIGR PE=1 SV=4	P01833	PIGR	83283.4	3	3	3	NADLQVLKPEPELVYEDLR	K	G	0.956	31.6	25.7	15	31.6	0	0	1	0	2	2241.18	9150.14	23622900	232	250
Mudpit_Aged L3_4 Posterior NP IAF	Clusterin OS=Homo sapiens GN=CLU PE=1 SV=1	P10909	CLU	52495	16	33	503	ASSIIDELFQDR	R	F	0.997	103	26.8	20.5	102	0	57	3	0	2	1393.7	9120.59	8748100000	183	194
Mudpit_Aged L3_4 Posterior NP IAF	Clusterin OS=Homo sapiens GN=CLU PE=1 SV=1	P10909	CLU	52495	16	33	503	EILSVDCSTNNPSQAK	R	L	0.997	81.6	25	18.1	81.6	0	30	0	0	2	1763.81	4266.31	1245530000	307	322
Mudpit_Aged L3_4 Posterior NP IAF	Clusterin OS=Homo sapiens GN=CLU PE=1 SV=1	P10909	CLU	52495	16	33	503	EIQNAVNGVK	K	Q	0.972	26.5	25.6	14.7	26.5	0	1	0	0	2	1071.58	2215.91	6558470	45	54
Mudpit_Aged L3_4 Posterior NP IAF	Clusterin OS=Homo sapiens GN=CLU PE=1 SV=1	P10909	CLU	52495	16	33	503	ELDESLQVAER	R	L	0.997	76.3	26.3	20.2	73.8	0	45	2	0	2	1288.64	5007.94	9086040000	326	336
Mudpit_Aged L3_4 Posterior NP IAF	Clusterin OS=Homo sapiens GN=CLU PE=1 SV=1	P10909	CLU	52495	16	33	503	FMETVAEK	K	A	0.99	56.1	25	16.5	56.1	0	46	0	0	2	970.455	2374.23	1027350000	430	437
Mudpit_Aged L3_4 Posterior NP IAF	Clusterin OS=Homo sapiens GN=CLU PE=1 SV=1	P10909	CLU	52495	16	33	503	IDSLLENDR	R	Q	0.997	68.6	28	26.6	59.3	0	19	0	0	2	1074.54	4127.47	1673200000	159	167
Mudpit_Aged L3_4 Posterior NP IAF	Clusterin OS=Homo sapiens GN=CLU PE=1 SV=1	P10909	CLU	52495	16	33	503	KTLLSNLEEAK	R	K	0.951	33	26.1	15.1	33	0	0	1	0	2	1245.7	6430.7	4209170	68	78
Mudpit_Aged L3_4 Posterior NP IAF	Clusterin OS=Homo sapiens GN=CLU PE=1 SV=1	P10909	CLU	52495	16	33	503	LANLTQGEDQYYLR	R	V	0.997	90.6	26.5	18.7	90.6	0	5	1	0	2	1683.83	5947.33	53478900	372	385
Mudpit_Aged L3_4 Posterior NP IAF	Clusterin OS=Homo sapiens GN=CLU PE=1 SV=1	P10909	CLU	52495	16	33	503	LFDSDPITVTVPVEVSR	K	K	0.997	81.3	27.4	18.1	81.3	0	18	6	0	2	1873.99	8875.19	2776780000	409	425
Mudpit_Aged L3_4 Posterior NP IAF	Clusterin OS=Homo sapiens GN=CLU PE=1 SV=1	P10909	CLU	52495	16	33	503	LFDSDPITVTVPVEVSRK	K	N	0.997	64.3	25.3	17	64.3	0	2	4	0	2	2002.09	8461.92	42178300	409	426
Mudpit_Aged L3_4 Posterior NP IAF	Clusterin OS=Homo sapiens GN=CLU PE=1 SV=1	P10909	CLU	52495	16	33	503	QQTHMLDVMQDHFSR	R	A	0.997	111	25	20	54.8	0	8	47	72	2	1888.84	8081.85	1970190000	168	182
Mudpit_Aged L3_4 Posterior NP IAF	Clusterin OS=Homo sapiens GN=CLU PE=1 SV=1	P10909	CLU	52495	16	33	503	RELDESLQVAER	R	L	0.997	79.6	27.2	27	70.5	0	7	10	0	2	1444.74	5298.96	244658000	325	336
Mudpit_Aged L3_4 Posterior NP IAF	Clusterin OS=Homo sapiens GN=CLU PE=1 SV=1	P10909	CLU	52495	16	33	503	SGSGLVGR	R	Q	0.99	59.5	25	34.3	41.9	0	6	0	0	2	732.4	1751.98	3583360	131	138
Mudpit_Aged L3_4 Posterior NP IAF	Clusterin OS=Homo sapiens GN=CLU PE=1 SV=1	P10909	CLU	52495	16	33	503	TLLSNLEEAK	K	K	0.997	64.3	27	17	64.3	0	30	0	0	2	1117.61	6222.33	5917730000	69	78
Mudpit_Aged L3_4 Posterior NP IAF	Clusterin OS=Homo sapiens GN=CLU PE=1 SV=1	P10909	CLU	52495	16	33	503	TLLSNLEEAKK	K	K	0.997	74.8	26.1	25	67.5	0	5	9	0	2	1245.7	6453.76	338615000	69	79
Mudpit_Aged L3_4 Posterior NP IAF	Clusterin OS=Homo sapiens GN=CLU PE=1 SV=1	P10909	CLU	52495	16	33	503	VTTVASHTSDSDVPSGVTEVVVK	R	L	0.997	126	26.8	20.9	126	0	40	29	0	2	2314.18	6063.26	11333600000	386	408
Mudpit_Aged L3_4 Posterior NP IAF	Laminin, gamma 1 (Formerly LAMB2), isoform CRA_a OS=Homo sapiens GN=LAMC1 PE=4 SV=1	A0A024R972,P11047	LAMC1	177601	4	4	4	DGSEASLEWSSER	R	Q	0.969	27.1	25	14.7	27.1	0	1	0	0	2	1452.62	4712.72	3466350	532	544
Mudpit_Aged L3_4 Posterior NP IAF	Laminin, gamma 1 (Formerly LAMB2), isoform CRA_a OS=Homo sapiens GN=LAMC1 PE=4 SV=1	A0A024R972,P11047	LAMC1	177601	4	4	4	EAQQALGSAAADATEAK	R	N	0.997	61.3	26.5	16.8	61.3	0	1	0	0	2	1631.79	3913.17	1175120	1407	1423
Mudpit_Aged L3_4 Posterior NP IAF	Laminin, gamma 1 (Formerly LAMB2), isoform CRA_a OS=Homo sapiens GN=LAMC1 PE=4 SV=1	A0A024R972,P11047	LAMC1	177601	4	4	4	LNEIEGTLNK	K	A	0.997	44.1	28.6	26.8	33.1	0	1	0	0	2	1130.61	3487.29	3768640	1535	1544
Mudpit_Aged L3_4 Posterior NP IAF	Laminin, gamma 1 (Formerly LAMB2), isoform CRA_a OS=Homo sapiens GN=LAMC1 PE=4 SV=1	A0A024R972,P11047	LAMC1	177601	4	4	4	QDIAVISDSYFPR	R	Y	0.997	60.7	26.6	16.8	60.7	0	1	0	0	2	1510.75	7455.56	5390560	545	557
Mudpit_Aged L3_4 Posterior NP IAF	Latent-transforming growth factor beta-binding protein 2 OS=Homo sapiens GN=LTBP2 PE=1 SV=1	G3V3X5,G3V511,Q14767,Q6AZ94	LTBP2	195043	3	4	6	ALLEAPLK	R	Q	0.99	42.8	25	15.7	42.8	0	2	0	0	2	854.535	4913.17	27598600	447	454
Mudpit_Aged L3_4 Posterior NP IAF	Latent-transforming growth factor beta-binding protein 2 OS=Homo sapiens GN=LTBP2 PE=1 SV=1	G3V3X5,G3V511,Q14767,Q6AZ94	LTBP2	195043	3	4	6	EQDAPVAGLQPVER	R	A	0.997	66.8	27.9	17.2	66.8	0	1	0	0	2	1508.77	4684.96	4053910	74	87
Mudpit_Aged L3_4 Posterior NP IAF	Latent-transforming growth factor beta-binding protein 2 OS=Homo sapiens GN=LTBP2 PE=1 SV=1	G3V3X5,G3V511,Q14767,Q6AZ94	LTBP2	195043	3	4	6	GAGGQSMSEAPTGDHAPAPTR	R	M	0.997	63.6	25	17	63.6	0	0	3	0	2	2010.89	1830.8	20999200	1390	1410
Mudpit_Aged L3_4 Posterior NP IAF	Endoplasmin OS=Homo sapiens GN=HSP90B1 PE=1 SV=1	P14625,Q5CAQ5,V9HWP2	HEL-S-125m,HSP90B1,TRA1	92471.7	4	4	10	DISTNYYASQK	K	K	0.997	55.9	25	16.5	55.9	0	2	0	0	2	1289.6	3183.81	7099660	672	682
Mudpit_Aged L3_4 Posterior NP IAF	Endoplasmin OS=Homo sapiens GN=HSP90B1 PE=1 SV=1	P14625,Q5CAQ5,V9HWP2	HEL-S-125m,HSP90B1,TRA1	92471.7	4	4	10	EEASDYLELDTIK	K	N	0.997	76.5	26.1	17.8	76.5	0	3	0	0	2	1525.73	6927.47	11734900	253	265
Mudpit_Aged L3_4 Posterior NP IAF	Endoplasmin OS=Homo sapiens GN=HSP90B1 PE=1 SV=1	P14625,Q5CAQ5,V9HWP2	HEL-S-125m,HSP90B1,TRA1	92471.7	4	4	10	ELISNASDALDK	R	I	0.997	57.8	26.9	16.6	57.8	0	2	0	0	2	1275.64	4892.14	10088900	103	114
Mudpit_Aged L3_4 Posterior NP IAF	Endoplasmin OS=Homo sapiens GN=HSP90B1 PE=1 SV=1	P14625,Q5CAQ5,V9HWP2	HEL-S-125m,HSP90B1,TRA1	92471.7	4	4	10	GVVDSDDLPLNVSR	K	E	0.997	76	26.4	17.8	76	0	3	0	0	2	1485.75	6349.08	12223000	435	448
Mudpit_Aged L3_4 Posterior NP IAF	Insulin-like growth factor binding protein 3 isoform b OS=Homo sapiens PE=2 SV=1	A6XNC9,A6XND0,A6XND1,B3KRZ1,B3KTQ0,B3KTS0,B3KVF9,B3KVY6,B3KWK7,B4DN53,B4DP07,H0Y485,H0Y5K2,P17936,Q6ZSD0	IGFBP3	31674.1	2	2	4	FLNVLSPR	K	G	0.99	36.2	26.8	15.3	36.2	0	2	0	0	2	945.552	6100.05	28667700	226	233
Mudpit_Aged L3_4 Posterior NP IAF	Insulin-like growth factor binding protein 3 isoform b OS=Homo sapiens PE=2 SV=1	A6XNC9,A6XND0,A6XND1,B3KRZ1,B3KTQ0,B3KTS0,B3KVF9,B3KVY6,B3KWK7,B4DN53,B4DP07,H0Y485,H0Y5K2,P17936,Q6ZSD0	IGFBP3	31674.1	2	2	4	YGQPLPGYTTK	K	G	0.997	41.2	26.3	15.6	41.2	0	2	0	0	2	1224.63	3993.3	16268500	268	278
Mudpit_Aged L3_4 Posterior NP IAF	Semaphorin-3A OS=Homo sapiens GN=SEMA3A PE=1 SV=1	Q14563	SEMA3A	88890.8	7	8	12	DHIFSFDLVNIK	K	D	0.997	52.5	29.5	16.3	52.5	0	1	0	0	2	1447.76	9176.31	12878700	75	86
Mudpit_Aged L3_4 Posterior NP IAF	Semaphorin-3A OS=Homo sapiens GN=SEMA3A PE=1 SV=1	Q14563	SEMA3A	88890.8	7	8	12	EPTAISAMELSTK	R	Q	0.997	55.3	27	16.5	55.3	0	5	0	0	2	1377.69	4166.12	34474900	485	497
Mudpit_Aged L3_4 Posterior NP IAF	Semaphorin-3A OS=Homo sapiens GN=SEMA3A PE=1 SV=1	Q14563	SEMA3A	88890.8	7	8	12	IVWPVSYTR	K	R	0.997	39.9	27.1	15.5	39.9	0	1	0	0	2	1120.61	6396.63	12057100	91	99
Mudpit_Aged L3_4 Posterior NP IAF	Semaphorin-3A OS=Homo sapiens GN=SEMA3A PE=1 SV=1	Q14563	SEMA3A	88890.8	7	8	12	NPVVYGVFTTSSNIFK	K	G	0.997	78.3	27.3	17.9	78.3	0	1	0	0	2	1772.92	8935	9987720	321	336
Mudpit_Aged L3_4 Posterior NP IAF	Semaphorin-3A OS=Homo sapiens GN=SEMA3A PE=1 SV=1	Q14563	SEMA3A	88890.8	7	8	12	QQQLYIGSTAGVAQLPLHR	K	C	0.995	52.4	25	16.3	52.4	0	0	1	0	2	2080.13	8266.44	4407950	498	516
Mudpit_Aged L3_4 Posterior NP IAF	Semaphorin-3A OS=Homo sapiens GN=SEMA3A PE=1 SV=1	Q14563	SEMA3A	88890.8	7	8	12	TDQGLLLR	R	S	0.99	53.5	29.4	25.9	43.9	0	2	0	0	2	915.526	4278.09	15045500	630	637
Mudpit_Aged L3_4 Posterior NP IAF	Semaphorin-3A OS=Homo sapiens GN=SEMA3A PE=1 SV=1	Q14563	SEMA3A	88890.8	7	8	12	TDVNYQFTQIVVDR	K	V	0.997	90.9	26.8	18.7	90.9	0	1	0	0	2	1697.85	7228.23	12638800	425	438
Mudpit_Aged L3_4 Posterior NP IAF	Inter-alpha (Globulin) inhibitor H2 OS=Homo sapiens GN=ITIH2 PE=2 SV=1	A2RTY6,P19823	ITIH2	106466	13	20	122	AEDHFSVIDFNQNIR	R	T	0.997	81	26	18.1	81	0	7	9	0	2	1804.86	7199.27	326446000	342	356
Mudpit_Aged L3_4 Posterior NP IAF	Inter-alpha (Globulin) inhibitor H2 OS=Homo sapiens GN=ITIH2 PE=2 SV=1	A2RTY6,P19823	ITIH2	106466	13	20	122	AHVSFKPTVAQQR	K	I	0.983	41.4	25	15.6	41.4	0	0	1	0	2	1468.8	3784.13	9117910	247	259
Mudpit_Aged L3_4 Posterior NP IAF	Inter-alpha (Globulin) inhibitor H2 OS=Homo sapiens GN=ITIH2 PE=2 SV=1	A2RTY6,P19823	ITIH2	106466	13	20	122	ETAVDGELVVLYDVK	R	R	0.997	86	30.9	18.4	86	0	16	0	0	2	1649.86	8630.76	180816000	266	280
Mudpit_Aged L3_4 Posterior NP IAF	Inter-alpha (Globulin) inhibitor H2 OS=Homo sapiens GN=ITIH2 PE=2 SV=1	A2RTY6,P19823	ITIH2	106466	13	20	122	FLHVPDTFEGHFDGVPVISK	R	G	0.992	48.7	27	16	48.7	0	0	6	12	2	2241.13	9659.37	160488000	223	242
Mudpit_Aged L3_4 Posterior NP IAF	Inter-alpha (Globulin) inhibitor H2 OS=Homo sapiens GN=ITIH2 PE=2 SV=1	A2RTY6,P19823	ITIH2	106466	13	20	122	FYNQVSTPLLR	K	N	0.997	41.8	26	15.6	41.8	0	1	0	0	2	1337.72	6655.47	5092480	489	499
Mudpit_Aged L3_4 Posterior NP IAF	Inter-alpha (Globulin) inhibitor H2 OS=Homo sapiens GN=ITIH2 PE=2 SV=1	A2RTY6,P19823	ITIH2	106466	13	20	122	IQPSGGTNINEALLR	K	A	0.997	103	26.2	19.4	103	0	10	1	0	2	1582.85	5939	254258000	380	394
Mudpit_Aged L3_4 Posterior NP IAF	Inter-alpha (Globulin) inhibitor H2 OS=Homo sapiens GN=ITIH2 PE=2 SV=1	A2RTY6,P19823	ITIH2	106466	13	20	122	IYGNQDTSSQLK	R	K	0.997	73.9	25.8	17.6	73.9	0	7	0	0	2	1353.66	2356.57	27645400	476	487
Mudpit_Aged L3_4 Posterior NP IAF	Inter-alpha (Globulin) inhibitor H2 OS=Homo sapiens GN=ITIH2 PE=2 SV=1	A2RTY6,P19823	ITIH2	106466	13	20	122	MATTMIQSK	R	V	0.995	33.8	25	15.1	12.2	0	1	0	0	2	1026.5	1916.74	651732	85	93
Mudpit_Aged L3_4 Posterior NP IAF	Inter-alpha (Globulin) inhibitor H2 OS=Homo sapiens GN=ITIH2 PE=2 SV=1	A2RTY6,P19823	ITIH2	106466	13	20	122	SLPGESEEMMEEVDQVTLYSYK	R	V	0.997	82.7	25	18.2	82.7	0	3	2	0	2	2564.14	8645.85	22105000	55	76
Mudpit_Aged L3_4 Posterior NP IAF	Inter-alpha (Globulin) inhibitor H2 OS=Homo sapiens GN=ITIH2 PE=2 SV=1	A2RTY6,P19823	ITIH2	106466	13	20	122	SSALDMENFR	R	T	0.997	68.6	25	17.3	68.6	0	18	0	0	2	1169.53	3916.56	312833000	157	166
Mudpit_Aged L3_4 Posterior NP IAF	Inter-alpha (Globulin) inhibitor H2 OS=Homo sapiens GN=ITIH2 PE=2 SV=1	A2RTY6,P19823	ITIH2	106466	13	20	122	TEVNVLPGAK	R	V	0.997	58.3	25	16.6	58.3	0	7	0	0	2	1027.58	4147.03	190031000	167	176
Mudpit_Aged L3_4 Posterior NP IAF	Inter-alpha (Globulin) inhibitor H2 OS=Homo sapiens GN=ITIH2 PE=2 SV=1	A2RTY6,P19823	ITIH2	106466	13	20	122	VQFELHYQEVK	K	W	0.997	70	26.8	17.8	69.6	0	5	3	0	2	1419.73	6694.88	193312000	177	187
Mudpit_Aged L3_4 Posterior NP IAF	Inter-alpha (Globulin) inhibitor H2 OS=Homo sapiens GN=ITIH2 PE=2 SV=1	A2RTY6,P19823	ITIH2	106466	13	20	122	VVNNSPQPQNVVFDVQIPK	K	G	0.997	111	26.8	19.9	111	0	7	6	0	2	2122.13	8076.95	188274000	94	112
Mudpit_Aged L3_4 Posterior NP IAF	Fructose-bisphosphate aldolase OS=Homo sapiens GN=ALDOA PE=1 SV=1	H3BQN4,P04075,V9HWN7	ALDOA,HEL-S-87p	39420.6	2	2	2	LQSIGTENTEENR	R	R	0.997	53.8	25.3	16.4	53.8	0	1	0	0	2	1490.71	2196.16	3926410	44	56
Mudpit_Aged L3_4 Posterior NP IAF	Fructose-bisphosphate aldolase OS=Homo sapiens GN=ALDOA PE=1 SV=1	H3BQN4,P04075,V9HWN7	ALDOA,HEL-S-87p	39420.6	2	2	2	QLLLTADDR	R	V	0.997	46.6	27.7	21.5	41	0	1	0	0	2	1044.57	4490.17	11479200	61	69
Mudpit_Aged L3_4 Posterior NP IAF	IGL@ protein OS=Homo sapiens GN=IGL@ PE=1 SV=1	Q5FWF9	IGL	24794.5	2	2	2	SGQAPVLVIYEDSK	K	R	0.997	59	25.5	17.3	58.3	0	1	0	0	2	1505.78	6663.96	5893590	58	71
Mudpit_Aged L3_4 Posterior NP IAF	IGL@ protein OS=Homo sapiens GN=IGL@ PE=1 SV=1	Q5FWF9	IGL	24794.5	2	2	2	YAASSYLSLTPEQWR	K	S	0.997	85.9	26.5	18.4	85.9	0	1	0	0	2	1771.86	8657.79	4020990	192	206
Mudpit_Aged L3_4 Posterior NP IAF	Triosephosphate isomerase OS=Homo sapiens GN=TPI1 PE=1 SV=3	P60174,Q53HE2,V9HWK1	HEL-S-49,TPI1	30790.8	5	6	7	ELASQPDVDGFLVGGASLKPEFVDIINAK	K	-	0.98	37.5	25	15.3	37.5	0	0	1	0	2	3029.58	9616.95	2026870	257	285
Mudpit_Aged L3_4 Posterior NP IAF	Triosephosphate isomerase OS=Homo sapiens GN=TPI1 PE=1 SV=3	P60174,Q53HE2,V9HWK1	HEL-S-49,TPI1	30790.8	5	6	7	IAVAAQNCYK	K	V	0.997	39.8	25.3	15.5	39.8	0	1	0	0	2	1138.56	2564.55	2148430	97	106
Mudpit_Aged L3_4 Posterior NP IAF	Triosephosphate isomerase OS=Homo sapiens GN=TPI1 PE=1 SV=3	P60174,Q53HE2,V9HWK1	HEL-S-49,TPI1	30790.8	5	6	7	QSLGELIGTLNAAK	K	V	0.997	86	26.5	20	84.4	0	1	0	0	2	1414.79	8694	6138590	57	70
Mudpit_Aged L3_4 Posterior NP IAF	Triosephosphate isomerase OS=Homo sapiens GN=TPI1 PE=1 SV=3	P60174,Q53HE2,V9HWK1	HEL-S-49,TPI1	30790.8	5	6	7	SNVSDAVAQSTR	K	I	0.997	82.4	25	18.2	82.4	0	1	1	0	2	1234.6	2106.26	14929500	232	243
Mudpit_Aged L3_4 Posterior NP IAF	Triosephosphate isomerase OS=Homo sapiens GN=TPI1 PE=1 SV=3	P60174,Q53HE2,V9HWK1	HEL-S-49,TPI1	30790.8	5	6	7	VVLAYEPVWAIGTGK	K	T	0.997	68.8	26	17.3	68.8	0	2	0	0	2	1602.89	8864.64	28658500	198	212
Mudpit_Aged L3_4 Posterior NP IAF	Hyaluronan-binding protein 2 OS=Homo sapiens GN=HABP2 PE=1 SV=1	Q14520	HABP2	62671.4	3	4	5	DEIPHNDIALLK	R	L	0.994	37.4	27.2	15.3	37.4	0	1	1	0	2	1377.74	6464.18	14782900	405	416
Mudpit_Aged L3_4 Posterior NP IAF	Hyaluronan-binding protein 2 OS=Homo sapiens GN=HABP2 PE=1 SV=1	Q14520	HABP2	62671.4	3	4	5	KEEFHEQSFR	K	V	0.997	37.5	27.5	20.5	32.4	0	1	0	0	2	1336.63	5505.3	4517640	382	391
Mudpit_Aged L3_4 Posterior NP IAF	Hyaluronan-binding protein 2 OS=Homo sapiens GN=HABP2 PE=1 SV=1	Q14520	HABP2	62671.4	3	4	5	VVLGDQDLK	K	K	0.997	44.8	28.3	16.2	44.5	0	2	0	0	2	986.552	3646.34	19175700	373	381
Mudpit_Aged L3_4 Posterior NP IAF	Sulfhydryl oxidase 1 OS=Homo sapiens GN=QSOX1 PE=1 SV=3	O00391	QSOX1	82578.7	12	15	35	AHFSPSNIILDFPAAGSAAR	K	R	0.985	45.8	27.2	15.9	45.8	0	0	3	0	2	2042.05	9394.38	37813500	533	552
Mudpit_Aged L3_4 Posterior NP IAF	Sulfhydryl oxidase 1 OS=Homo sapiens GN=QSOX1 PE=1 SV=3	O00391	QSOX1	82578.7	12	15	35	DFNIPGFPTVR	R	F	0.985	33.8	27.7	15.1	33.8	0	3	0	0	2	1262.65	9023.39	40304700	112	122
Mudpit_Aged L3_4 Posterior NP IAF	Sulfhydryl oxidase 1 OS=Homo sapiens GN=QSOX1 PE=1 SV=3	O00391	QSOX1	82578.7	12	15	35	DVQNVAAAPELAMGALELESR	R	N	0.997	118	26.8	20.4	118	0	1	0	0	2	2184.1	9154.04	11124000	554	574
Mudpit_Aged L3_4 Posterior NP IAF	Sulfhydryl oxidase 1 OS=Homo sapiens GN=QSOX1 PE=1 SV=3	O00391	QSOX1	82578.7	12	15	35	EVALDLSQHK	R	G	0.997	48.8	25.8	16	48.8	0	1	1	0	2	1139.61	3563.08	20403900	202	211
Mudpit_Aged L3_4 Posterior NP IAF	Sulfhydryl oxidase 1 OS=Homo sapiens GN=QSOX1 PE=1 SV=3	O00391	QSOX1	82578.7	12	15	35	FPVLEGQR	R	L	0.99	41.9	32.5	20	37.5	0	1	0	0	2	945.515	4829.25	7863810	319	326
Mudpit_Aged L3_4 Posterior NP IAF	Sulfhydryl oxidase 1 OS=Homo sapiens GN=QSOX1 PE=1 SV=3	O00391	QSOX1	82578.7	12	15	35	IYMADLESALHYILR	K	I	0.982	41.8	27.2	15.6	41.8	0	0	4	0	2	1823.94	9819.93	8555610	299	313
Mudpit_Aged L3_4 Posterior NP IAF	Sulfhydryl oxidase 1 OS=Homo sapiens GN=QSOX1 PE=1 SV=3	O00391	QSOX1	82578.7	12	15	35	LAGAPSEDPQFPK	R	V	0.997	36.2	25.8	15.3	36.2	0	2	0	0	2	1356.68	4456.53	28062200	488	500
Mudpit_Aged L3_4 Posterior NP IAF	Sulfhydryl oxidase 1 OS=Homo sapiens GN=QSOX1 PE=1 SV=3	O00391	QSOX1	82578.7	12	15	35	LEEIDGFFAR	K	N	0.997	45.7	25.4	15.9	45.7	0	4	0	0	2	1196.59	7255.4	62331500	173	182
Mudpit_Aged L3_4 Posterior NP IAF	Sulfhydryl oxidase 1 OS=Homo sapiens GN=QSOX1 PE=1 SV=3	O00391	QSOX1	82578.7	12	15	35	NNEEYLALIFEK	R	G	0.997	53.1	26.2	16.3	53.1	0	2	0	0	2	1482.75	9114.08	30470600	183	194
Mudpit_Aged L3_4 Posterior NP IAF	Sulfhydryl oxidase 1 OS=Homo sapiens GN=QSOX1 PE=1 SV=3	O00391	QSOX1	82578.7	12	15	35	SALYSPSDPLTLLQADTVR	R	G	0.997	145	26	22.1	145	0	3	1	0	2	2047.07	9199.2	68360800	33	51
Mudpit_Aged L3_4 Posterior NP IAF	Sulfhydryl oxidase 1 OS=Homo sapiens GN=QSOX1 PE=1 SV=3	O00391	QSOX1	82578.7	12	15	35	VLNTEANVVR	R	K	0.997	63.5	27.7	26	54.5	0	2	0	0	2	1114.62	2844.17	16440200	218	227
Mudpit_Aged L3_4 Posterior NP IAF	Sulfhydryl oxidase 1 OS=Homo sapiens GN=QSOX1 PE=1 SV=3	O00391	QSOX1	82578.7	12	15	35	VPVLMESR	R	S	0.99	46.1	26.8	16	46	0	7	0	0	2	930.508	2793.76	43282800	249	256
Mudpit_Aged L3_4 Posterior NP IAF	cDNA FLJ61290, highly similar to Neutral alpha-glucosidase AB OS=Homo sapiens PE=2 SV=1	B4DJ30,Q14697,V9HWJ0	GANAB,HEL-S-164nA	106876	4	4	5	DEPGAWEETFK	K	T	0.959	27.2	25	14.7	27.2	0	1	0	0	2	1308.57	6169.8	5781040	221	231
Mudpit_Aged L3_4 Posterior NP IAF	cDNA FLJ61290, highly similar to Neutral alpha-glucosidase AB OS=Homo sapiens PE=2 SV=1	B4DJ30,Q14697,V9HWJ0	GANAB,HEL-S-164nA	106876	4	4	5	LSFQHDPETSVLVLR	R	K	0.996	63.5	26.6	17	63.5	0	0	1	0	2	1740.93	8908.81	7179390	915	929
Mudpit_Aged L3_4 Posterior NP IAF	cDNA FLJ61290, highly similar to Neutral alpha-glucosidase AB OS=Homo sapiens PE=2 SV=1	B4DJ30,Q14697,V9HWJ0	GANAB,HEL-S-164nA	106876	4	4	5	NPEPELLVR	K	W	0.997	39.3	25.9	15.5	39.3	0	2	0	0	2	1066.59	5095.26	19033900	654	662
Mudpit_Aged L3_4 Posterior NP IAF	cDNA FLJ61290, highly similar to Neutral alpha-glucosidase AB OS=Homo sapiens PE=2 SV=1	B4DJ30,Q14697,V9HWJ0	GANAB,HEL-S-164nA	106876	4	4	5	VPDVLVADPPIAR	R	L	0.993	35.4	25	15.2	35.4	0	1	0	0	2	1361.78	6601.53	6663620	115	127
Mudpit_Aged L3_4 Posterior NP IAF	Chondroadherin OS=Homo sapiens GN=CHAD PE=2 SV=2	O15335	CHAD	40477.7	10	16	135	AGAFDDLTELTYLYLDHNK	R	V	0.997	148	25.4	22.3	148	0	38	52	0	2	2199.06	10004.7	469622000	116	134
Mudpit_Aged L3_4 Posterior NP IAF	Chondroadherin OS=Homo sapiens GN=CHAD PE=2 SV=2	O15335	CHAD	40477.7	10	16	135	AGAFQGAK	R	D	0.99	41.4	25	15.6	41.4	0	2	0	0	2	749.394	1621.94	444902	164	171
Mudpit_Aged L3_4 Posterior NP IAF	Chondroadherin OS=Homo sapiens GN=CHAD PE=2 SV=2	O15335	CHAD	40477.7	10	16	135	FSDGAFLGVTTLK	K	H	0.997	76	25	17.8	76	0	10	1	0	2	1355.72	8111.96	263526000	259	271
Mudpit_Aged L3_4 Posterior NP IAF	Chondroadherin OS=Homo sapiens GN=CHAD PE=2 SV=2	O15335	CHAD	40477.7	10	16	135	LNQLPSNFPFDSLETLALTNNPWK	R	C	0.997	88.9	26.1	18.6	88.9	0	1	3	0	2	2759.4	9431	63268500	280	303
Mudpit_Aged L3_4 Posterior NP IAF	Chondroadherin OS=Homo sapiens GN=CHAD PE=2 SV=2	O15335	CHAD	40477.7	10	16	135	NNFPVLAANSFR	R	A	0.997	47.3	27.6	16	47.3	0	3	0	0	2	1349.7	7186.19	98408000	61	72
Mudpit_Aged L3_4 Posterior NP IAF	Chondroadherin OS=Homo sapiens GN=CHAD PE=2 SV=2	O15335	CHAD	40477.7	10	16	135	NQLSSYPSAALSK	R	L	0.997	65.5	27.2	17.1	65.5	0	5	0	0	2	1365.7	4305.86	137747000	205	217
Mudpit_Aged L3_4 Posterior NP IAF	Chondroadherin OS=Homo sapiens GN=CHAD PE=2 SV=2	O15335	CHAD	40477.7	10	16	135	QLIYLYLSHNDIR	K	V	0.997	70.3	25.7	17.4	70.3	0	1	1	0	2	1647.89	8235.83	26790600	100	112
Mudpit_Aged L3_4 Posterior NP IAF	Chondroadherin OS=Homo sapiens GN=CHAD PE=2 SV=2	O15335	CHAD	40477.7	10	16	135	SIPDNAFQSFGR	K	Y	0.997	49.9	30.7	16.1	49.9	0	5	0	0	2	1338.64	6570.67	139292000	233	244
Mudpit_Aged L3_4 Posterior NP IAF	Chondroadherin OS=Homo sapiens GN=CHAD PE=2 SV=2	O15335	CHAD	40477.7	10	16	135	WLYLSENALSSLQPGALDDVENLAK	R	F	0.997	110	26.9	19.9	110	0	2	3	0	2	2746.39	9369.23	61157300	175	199
Mudpit_Aged L3_4 Posterior NP IAF	Chondroadherin OS=Homo sapiens GN=CHAD PE=2 SV=2	O15335	CHAD	40477.7	10	16	135	YLETLWLDNTNLEK	R	F	0.997	74.2	27.3	17.6	74.2	0	7	1	0	2	1751.89	8972.5	91231600	245	258
Mudpit_Aged L3_4 Posterior NP IAF	Cofilin-1 OS=Homo sapiens GN=CFL1 PE=1 SV=1	E9PK25,E9PP50,G3V1A4,P23528,V9HWI5	CFL1,HEL-S-15	18503.2	2	2	3	EILVGDVGQTVDDPYATFVK	K	M	0.997	74.2	26.9	17.6	74.2	0	1	0	0	2	2166.1	8796.66	4129050	54	73
Mudpit_Aged L3_4 Posterior NP IAF	Cofilin-1 OS=Homo sapiens GN=CFL1 PE=1 SV=1	E9PK25,E9PP50,G3V1A4,P23528,V9HWI5	CFL1,HEL-S-15	18503.2	2	2	3	YALYDATYETK	R	E	0.997	42.1	25.1	16.2	41.5	0	2	0	0	2	1337.63	4960.53	11765100	82	92
Mudpit_Aged L3_4 Posterior NP IAF	Cathepsin D OS=Homo sapiens GN=CTSD PE=1 SV=1	A0A1B0GV23_HUMAN,A0A1B0GVD5_HUMAN,A0A1B0GW44_HUMAN,A0A1B0GWE8_HUMAN,P07339,V9HWI3	CTSD,HEL-S-130P	44553	4	5	6	DPDAQPGGELMLGGTDSK	R	Y	0.997	72.4	25	17.5	72.4	0	1	0	0	2	1787.81	5712.65	4108830	236	253
Mudpit_Aged L3_4 Posterior NP IAF	Cathepsin D OS=Homo sapiens GN=CTSD PE=1 SV=1	A0A1B0GV23_HUMAN,A0A1B0GVD5_HUMAN,A0A1B0GW44_HUMAN,A0A1B0GWE8_HUMAN,P07339,V9HWI3	CTSD,HEL-S-130P	44553	4	5	6	FDGILGMAYPR	K	I	0.997	50.6	25	19.1	47.7	0	3	0	0	2	1239.62	8321.08	21548500	195	205
Mudpit_Aged L3_4 Posterior NP IAF	Cathepsin D OS=Homo sapiens GN=CTSD PE=1 SV=1	A0A1B0GV23_HUMAN,A0A1B0GVD5_HUMAN,A0A1B0GW44_HUMAN,A0A1B0GWE8_HUMAN,P07339,V9HWI3	CTSD,HEL-S-130P	44553	4	5	6	LSPEDYTLK	K	V	0.995	36.7	26.9	26.3	25.7	0	1	0	0	2	1065.55	4806.79	23654900	349	357
Mudpit_Aged L3_4 Posterior NP IAF	Cathepsin D OS=Homo sapiens GN=CTSD PE=1 SV=1	A0A1B0GV23_HUMAN,A0A1B0GVD5_HUMAN,A0A1B0GW44_HUMAN,A0A1B0GWE8_HUMAN,P07339,V9HWI3	CTSD,HEL-S-130P	44553	4	5	6	LVDQNIFSFYLSR	K	D	0.997	81.7	26.8	18.1	81.7	0	1	0	0	2	1601.83	9154.26	9304980	223	235
Mudpit_Aged L3_4 Posterior NP IAF	Transforming growth factor, beta 1 (Camurati-Engelmann disease), isoform CRA_a OS=Homo sapiens GN=TGFB1 PE=3 SV=1	A0A024R0P8,P01137	TGFB1	44342.3	3	3	3	LLAPSDSPEWLSFDVTGVVR	R	Q	0.997	95.3	26.1	19	95.3	0	1	0	0	2	2188.13	9274.96	3617820	186	205
Mudpit_Aged L3_4 Posterior NP IAF	Transforming growth factor, beta 1 (Camurati-Engelmann disease), isoform CRA_a OS=Homo sapiens GN=TGFB1 PE=3 SV=1	A0A024R0P8,P01137	TGFB1	44342.3	3	3	3	VAGESAEPEPEPEADYYAK	R	E	0.997	60.4	25	16.8	60.4	0	1	0	0	2	2051.91	4822.52	2608780	88	106
Mudpit_Aged L3_4 Posterior NP IAF	Transforming growth factor, beta 1 (Camurati-Engelmann disease), isoform CRA_a OS=Homo sapiens GN=TGFB1 PE=3 SV=1	A0A024R0P8,P01137	TGFB1	44342.3	3	3	3	VEQLSNMIVR	K	S	0.997	53	27.4	18.7	50.7	0	1	0	0	2	1188.64	6009.14	6098820	376	385
Mudpit_Aged L3_4 Posterior NP IAF	Vitamin K-dependent protein Z variant 1 OS=Homo sapiens GN=PROZ PE=4 SV=1	B0YJC6,P22891	PROZ	44742.6	2	2	3	DFAEHLLIPR	K	T	0.981	38.3	25.7	15.4	38.3	0	0	1	0	2	1210.66	9136.6	8551650	286	295
Mudpit_Aged L3_4 Posterior NP IAF	Vitamin K-dependent protein Z variant 1 OS=Homo sapiens GN=PROZ PE=4 SV=1	B0YJC6,P22891	PROZ	44742.6	2	2	3	ENFVLTTAK	R	C	0.997	51.7	26	16.2	51.7	0	2	0	0	2	1022.55	4150.6	16946400	210	218
Mudpit_Aged L3_4 Posterior NP IAF	Dermatan sulfate proteoglycan 3, isoform CRA_a OS=Homo sapiens GN=DSPG3 PE=4 SV=1	A0A024RBC3,Q99645	DSPG3,EPYC	36638.6	3	4	6	IDLTSNLISEIDEDAFR	R	K	0.997	128	25.8	21	128	0	1	0	0	2	1950.97	9266.28	27688400	172	188
Mudpit_Aged L3_4 Posterior NP IAF	Dermatan sulfate proteoglycan 3, isoform CRA_a OS=Homo sapiens GN=DSPG3 PE=4 SV=1	A0A024RBC3,Q99645	DSPG3,EPYC	36638.6	3	4	6	LDGNPINLSK	R	T	0.997	51.6	25	16.2	51.6	0	3	0	0	2	1070.58	4193.63	26781100	296	305
Mudpit_Aged L3_4 Posterior NP IAF	Dermatan sulfate proteoglycan 3, isoform CRA_a OS=Homo sapiens GN=DSPG3 PE=4 SV=1	A0A024RBC3,Q99645	DSPG3,EPYC	36638.6	3	4	6	QLPELPTTLTFIDISNNR	R	L	0.997	85.3	26.2	18.3	85.3	0	1	1	0	2	2072.1	9234.34	27618000	205	222
Mudpit_Aged L3_4 Posterior NP IAF	cDNA, FLJ94267, highly similar to Homo sapiens glutathione S-transferase omega 1 (GSTO1), mRNA OS=Homo sapiens PE=2 SV=1	B2R983,P78417,V9HWG9	GSTO1,HEL-S-21	27567.2	2	2	2	HEVININLK	R	N	0.997	58.9	25	20.4	55.2	0	1	0	0	2	1079.62	5136.17	7811340	49	57
Mudpit_Aged L3_4 Posterior NP IAF	cDNA, FLJ94267, highly similar to Homo sapiens glutathione S-transferase omega 1 (GSTO1), mRNA OS=Homo sapiens PE=2 SV=1	B2R983,P78417,V9HWG9	GSTO1,HEL-S-21	27567.2	2	2	2	LLPDDPYEK	K	A	0.997	47.3	26.4	18.7	44.6	0	1	0	0	2	1089.55	4421.67	10010500	102	110
Mudpit_Aged L3_4 Posterior NP IAF	Alpha-1-acid glycoprotein 1 OS=Homo sapiens GN=ORM1 PE=1 SV=1	P02763,V9HWF6	HEL-S-153w,ORM1	23512.1	6	10	72	NWGLSVYADKPETTK	K	E	0.997	65.7	31.8	17.1	65.7	0	8	3	0	2	1708.85	7135.42	973111000	139	153
Mudpit_Aged L3_4 Posterior NP IAF	Alpha-1-acid glycoprotein 1 OS=Homo sapiens GN=ORM1 PE=1 SV=1	P02763,V9HWF6	HEL-S-153w,ORM1	23512.1	6	10	72	SDVVYTDWK	K	K	0.997	76.5	25	17.8	76.5	0	10	0	0	2	1112.53	4960.94	310369000	171	179
Mudpit_Aged L3_4 Posterior NP IAF	Alpha-1-acid glycoprotein 1 OS=Homo sapiens GN=ORM1 PE=1 SV=1	P02763,V9HWF6	HEL-S-153w,ORM1	23512.1	6	10	72	TEDTIFLR	K	E	0.99	61.2	27.3	18.7	59.3	0	12	0	0	2	994.52	5408.49	1029510000	74	81
Mudpit_Aged L3_4 Posterior NP IAF	Alpha-1-acid glycoprotein 1 OS=Homo sapiens GN=ORM1 PE=1 SV=1	P02763,V9HWF6	HEL-S-153w,ORM1	23512.1	6	10	72	TYMLAFDVNDEK	K	N	0.997	75.9	25	17.7	75.9	0	23	0	0	2	1461.66	6780.91	847582000	127	138
Mudpit_Aged L3_4 Posterior NP IAF	Alpha-1-acid glycoprotein 1 OS=Homo sapiens GN=ORM1 PE=1 SV=1	P02763,V9HWF6	HEL-S-153w,ORM1	23512.1	6	10	72	WFYIASAFR	K	N	0.993	36.6	27.2	15.3	36.6	0	2	0	0	2	1160.59	8792.76	51249900	43	51
Mudpit_Aged L3_4 Posterior NP IAF	Alpha-1-acid glycoprotein 1 OS=Homo sapiens GN=ORM1 PE=1 SV=1	P02763,V9HWF6	HEL-S-153w,ORM1	23512.1	6	10	72	YVGGQEHFAHLLILR	R	D	0.997	101	27.8	19.3	101	0	4	3	7	2	1752.95	9291.53	898893000	109	123
Mudpit_Aged L3_4 Posterior NP IAF	Peptidyl-prolyl cis-trans isomerase OS=Homo sapiens PE=2 SV=1	A8K486,B2RE56,P62937,Q71V99,V9HWF5	HEL-S-69p,PPIA	18012.9	2	2	2	FEDENFILK	K	H	0.997	39.2	29.3	15.5	39.2	0	1	0	0	2	1154.57	6512.84	5692600	83	91
Mudpit_Aged L3_4 Posterior NP IAF	Peptidyl-prolyl cis-trans isomerase OS=Homo sapiens PE=2 SV=1	A8K486,B2RE56,P62937,Q71V99,V9HWF5	HEL-S-69p,PPIA	18012.9	2	2	2	VSFELFADK	R	V	0.997	47.5	25	16	47.5	0	1	0	0	2	1055.54	7984.54	3692840	20	28
Mudpit_Aged L3_4 Posterior NP IAF	Phosphoglycerate kinase 1 OS=Homo sapiens GN=PGK1 PE=1 SV=3	P00558,V9HWF4	HEL-S-68p,PGK1	44615.3	7	11	12	ALMDEVVK	K	A	0.978	31	26.4	14.9	31	0	1	0	0	2	904.481	4647.72	5079300	354	361
Mudpit_Aged L3_4 Posterior NP IAF	Phosphoglycerate kinase 1 OS=Homo sapiens GN=PGK1 PE=1 SV=3	P00558,V9HWF4	HEL-S-68p,PGK1	44615.3	7	11	12	IQLINNMLDK	K	V	0.991	33.3	27.7	20.6	27.8	0	2	0	0	2	1217.66	6154.33	9650200	221	230
Mudpit_Aged L3_4 Posterior NP IAF	Phosphoglycerate kinase 1 OS=Homo sapiens GN=PGK1 PE=1 SV=3	P00558,V9HWF4	HEL-S-68p,PGK1	44615.3	7	11	12	LGDVYVNDAFGTAHR	K	A	0.997	72	27	17.5	72	0	1	1	0	2	1634.79	5781.04	18841000	157	171
Mudpit_Aged L3_4 Posterior NP IAF	Phosphoglycerate kinase 1 OS=Homo sapiens GN=PGK1 PE=1 SV=3	P00558,V9HWF4	HEL-S-68p,PGK1	44615.3	7	11	12	VDFNVPMK	R	N	0.99	44.8	27.2	15.8	44.8	0	1	0	0	2	965.476	3779.05	5185110	23	30
Mudpit_Aged L3_4 Posterior NP IAF	Phosphoglycerate kinase 1 OS=Homo sapiens GN=PGK1 PE=1 SV=3	P00558,V9HWF4	HEL-S-68p,PGK1	44615.3	7	11	12	VLNNMEIGTSLFDEEGAK	K	I	0.997	117	25	20.3	117	0	2	0	0	2	1982.94	7770.59	9549170	247	264
Mudpit_Aged L3_4 Posterior NP IAF	Phosphoglycerate kinase 1 OS=Homo sapiens GN=PGK1 PE=1 SV=3	P00558,V9HWF4	HEL-S-68p,PGK1	44615.3	7	11	12	VSHVSTGGGASLELLEGK	K	V	0.997	111	27.4	19.9	111	0	1	1	0	2	1740.91	5963.77	20174300	389	406
Mudpit_Aged L3_4 Posterior NP IAF	Phosphoglycerate kinase 1 OS=Homo sapiens GN=PGK1 PE=1 SV=3	P00558,V9HWF4	HEL-S-68p,PGK1	44615.3	7	11	12	YSLEPVAVELK	K	S	0.997	47.5	26.1	16	47.5	0	2	0	0	2	1247.69	6770.48	66388400	76	86
Mudpit_Aged L3_4 Posterior NP IAF	Glutathione S-transferase P OS=Homo sapiens GN=GSTP1 PE=1 SV=2	P09211,V9HWE9	GSTP1,HEL-S-22	23356.7	2	2	3	EEVVTVETWQEGSLK	K	A	0.961	29.1	29.2	14.8	29.1	0	1	0	0	2	1733.86	6913.57	1659100	31	45
Mudpit_Aged L3_4 Posterior NP IAF	Glutathione S-transferase P OS=Homo sapiens GN=GSTP1 PE=1 SV=2	P09211,V9HWE9	GSTP1,HEL-S-22	23356.7	2	2	3	FQDGDLTLYQSNTILR	K	H	0.997	86.9	27.9	19.1	86.2	0	2	0	0	2	1883.95	8193.93	4667690	56	71
Mudpit_Aged L3_4 Posterior NP IAF	Rho GDP-dissociation inhibitor 1 OS=Homo sapiens GN=ARHGDIA PE=1 SV=1	J3KRE2,J3KTF8,J3QQX2,P52565,V9HWE8	ARHGDIA,HEL-S-47e	23207.5	2	2	2	AEEYEFLTPVEEAPK	R	G	0.997	37.8	26	15.4	37.8	0	1	0	0	2	1751.84	7572.94	4965930	153	167
Mudpit_Aged L3_4 Posterior NP IAF	Rho GDP-dissociation inhibitor 1 OS=Homo sapiens GN=ARHGDIA PE=1 SV=1	J3KRE2,J3KTF8,J3QQX2,P52565,V9HWE8	ARHGDIA,HEL-S-47e	23207.5	2	2	2	TDYMVGSYGPR	K	A	0.997	41.5	25	15.6	41.5	0	1	0	0	2	1245.56	4689.04	5565500	142	152
Mudpit_Aged L3_4 Posterior NP IAF	Inter-alpha-trypsin inhibitor heavy chain H1 OS=Homo sapiens GN=ITIH1 PE=1 SV=3	P19827	ITIH1	101390	13	19	54	AAISGENAGLVR	K	A	0.997	79.3	26.8	27.7	69.6	0	4	0	0	2	1157.63	3186.71	46922500	126	137
Mudpit_Aged L3_4 Posterior NP IAF	Inter-alpha-trypsin inhibitor heavy chain H1 OS=Homo sapiens GN=ITIH1 PE=1 SV=3	P19827	ITIH1	101390	13	19	54	EVAFDLEIPK	R	T	0.997	50.1	27.2	16.1	50.1	0	5	0	0	2	1160.62	7918.11	36923100	84	93
Mudpit_Aged L3_4 Posterior NP IAF	Inter-alpha-trypsin inhibitor heavy chain H1 OS=Homo sapiens GN=ITIH1 PE=1 SV=3	P19827	ITIH1	101390	13	19	54	FAHYVVTSQVVNTANEAR	R	E	0.997	92.7	26.5	18.8	92.7	0	5	3	0	2	2006.01	7015.66	112788000	66	83
Mudpit_Aged L3_4 Posterior NP IAF	Inter-alpha-trypsin inhibitor heavy chain H1 OS=Homo sapiens GN=ITIH1 PE=1 SV=3	P19827	ITIH1	101390	13	19	54	GMADQDGLKPTIDKPSEDSPPLEMLGPR	R	R	0.988	46	28.8	15.9	46	0	0	2	1	2	3026.45	6649.69	16515500	613	640
Mudpit_Aged L3_4 Posterior NP IAF	Inter-alpha-trypsin inhibitor heavy chain H1 OS=Homo sapiens GN=ITIH1 PE=1 SV=3	P19827	ITIH1	101390	13	19	54	GSLVQASEANLQAAQDFVR	K	G	0.997	159	26.5	22.9	159	0	6	3	0	2	2004.01	8299.22	46815600	342	360
Mudpit_Aged L3_4 Posterior NP IAF	Inter-alpha-trypsin inhibitor heavy chain H1 OS=Homo sapiens GN=ITIH1 PE=1 SV=3	P19827	ITIH1	101390	13	19	54	ILGDMQPGDYFDLVLFGTR	K	V	0.997	76	25.8	17.7	76	0	1	0	0	2	2173.06	9392.89	7053010	318	336
Mudpit_Aged L3_4 Posterior NP IAF	Inter-alpha-trypsin inhibitor heavy chain H1 OS=Homo sapiens GN=ITIH1 PE=1 SV=3	P19827	ITIH1	101390	13	19	54	LDAQASFLPK	K	E	0.997	85.4	27.8	18.3	85.4	0	9	0	0	2	1089.59	5635.75	116818000	205	214
Mudpit_Aged L3_4 Posterior NP IAF	Inter-alpha-trypsin inhibitor heavy chain H1 OS=Homo sapiens GN=ITIH1 PE=1 SV=3	P19827	ITIH1	101390	13	19	54	NHMQYEIVIK	R	V	0.99	32.3	27.3	15	32.3	0	2	0	0	2	1274.66	5595.89	13416600	171	180
Mudpit_Aged L3_4 Posterior NP IAF	Inter-alpha-trypsin inhibitor heavy chain H1 OS=Homo sapiens GN=ITIH1 PE=1 SV=3	P19827	ITIH1	101390	13	19	54	QAVDTAVDGVFIR	R	S	0.997	78.6	27.6	17.9	78.6	0	3	1	0	2	1390.73	6531.56	39498600	42	54
Mudpit_Aged L3_4 Posterior NP IAF	Inter-alpha-trypsin inhibitor heavy chain H1 OS=Homo sapiens GN=ITIH1 PE=1 SV=3	P19827	ITIH1	101390	13	19	54	QDGVVVTINK	R	K	0.997	42.3	27.1	17.8	40.2	0	1	0	0	2	1072.6	3440.39	5029790	772	781
Mudpit_Aged L3_4 Posterior NP IAF	Inter-alpha-trypsin inhibitor heavy chain H1 OS=Homo sapiens GN=ITIH1 PE=1 SV=3	P19827	ITIH1	101390	13	19	54	QYYEGSEIVVAGR	K	I	0.997	61.5	26.3	16.8	61.5	0	4	0	0	2	1470.72	4951.52	106655000	502	514
Mudpit_Aged L3_4 Posterior NP IAF	Inter-alpha-trypsin inhibitor heavy chain H1 OS=Homo sapiens GN=ITIH1 PE=1 SV=3	P19827	ITIH1	101390	13	19	54	TAFISDFAVTADGNAFIGDIK	K	D	0.997	140	26.3	21.7	140	0	1	0	0	2	2173.08	9214.36	6163100	94	114
Mudpit_Aged L3_4 Posterior NP IAF	Inter-alpha-trypsin inhibitor heavy chain H1 OS=Homo sapiens GN=ITIH1 PE=1 SV=3	P19827	ITIH1	101390	13	19	54	TMEQFTIHLTVNPQSK	R	V	0.991	51.1	26.4	16.2	51.1	0	0	3	0	2	1889.94	7559.69	29818100	142	157
Mudpit_Aged L3_4 Posterior NP IAF	Carbonic anhydrase 1 (Fragment) OS=Homo sapiens GN=CA1 PE=1 SV=1	E5RFE7,E5RH81,E5RHP7,H0YBE2,P00915,V9HWE3	CA1,HEL-S-11	28870.4	2	2	2	GGPFSDSYR	K	L	0.997	39.3	25	15.5	39.3	0	1	0	0	2	985.437	3246.63	4090090	82	90
Mudpit_Aged L3_4 Posterior NP IAF	Carbonic anhydrase 1 (Fragment) OS=Homo sapiens GN=CA1 PE=1 SV=1	E5RFE7,E5RH81,E5RHP7,H0YBE2,P00915,V9HWE3	CA1,HEL-S-11	28870.4	2	2	2	VLDALQAIK	K	T	0.997	43.4	25	19.8	39.2	0	1	0	0	2	970.593	6245.41	4680410	161	169
Mudpit_Aged L3_4 Posterior NP IAF	Vimentin OS=Homo sapiens GN=VIM PE=1 SV=4	P08670,V9HWE1	HEL113,VIM	53652.7	11	14	22	DNLAEDIMR	R	L	0.997	40.2	25	15.5	40.2	0	1	0	0	2	1076.5	6367.61	12246100	176	184
Mudpit_Aged L3_4 Posterior NP IAF	Vimentin OS=Homo sapiens GN=VIM PE=1 SV=4	P08670,V9HWE1	HEL113,VIM	53652.7	11	14	22	EEAENTLQSFR	R	Q	0.997	69.4	25	17.3	69.4	0	1	0	0	2	1323.62	4393.78	62692100	197	207
Mudpit_Aged L3_4 Posterior NP IAF	Vimentin OS=Homo sapiens GN=VIM PE=1 SV=4	P08670,V9HWE1	HEL113,VIM	53652.7	11	14	22	EMEENFAVEAANYQDTIGR	R	L	0.997	123	25	20.7	123	0	3	1	0	2	2186.97	7639.29	21191200	346	364
Mudpit_Aged L3_4 Posterior NP IAF	Vimentin OS=Homo sapiens GN=VIM PE=1 SV=4	P08670,V9HWE1	HEL113,VIM	53652.7	11	14	22	EYQDLLNVK	R	M	0.997	42.7	27.3	15.7	0	0	2	0	0	2	1121.58	5798.08	18226000	382	390
Mudpit_Aged L3_4 Posterior NP IAF	Vimentin OS=Homo sapiens GN=VIM PE=1 SV=4	P08670,V9HWE1	HEL113,VIM	53652.7	11	14	22	ILLAELEQLK	K	G	0.997	52	25	16.3	52	0	2	0	0	2	1169.71	8461.7	32935200	130	139
Mudpit_Aged L3_4 Posterior NP IAF	Vimentin OS=Homo sapiens GN=VIM PE=1 SV=4	P08670,V9HWE1	HEL113,VIM	53652.7	11	14	22	LGDLYEEEMR	R	E	0.997	58.3	25	16.6	58.3	0	3	0	0	2	1254.57	4210.79	11294600	146	155
Mudpit_Aged L3_4 Posterior NP IAF	Vimentin OS=Homo sapiens GN=VIM PE=1 SV=4	P08670,V9HWE1	HEL113,VIM	53652.7	11	14	22	LQDEIQNMK	R	E	0.997	57.7	27.1	16.6	57.7	0	4	0	0	2	1134.55	2472.1	7533910	365	373
Mudpit_Aged L3_4 Posterior NP IAF	Vimentin OS=Homo sapiens GN=VIM PE=1 SV=4	P08670,V9HWE1	HEL113,VIM	53652.7	11	14	22	MALDIEIATYR	K	K	0.962	25.9	26	22.2	0	0	1	0	0	2	1311.66	6501.07	12414200	391	401
Mudpit_Aged L3_4 Posterior NP IAF	Vimentin OS=Homo sapiens GN=VIM PE=1 SV=4	P08670,V9HWE1	HEL113,VIM	53652.7	11	14	22	SLYASSPGGVYATR	R	S	0.997	38	25	15.4	38	0	1	0	0	2	1428.71	4320.68	7034250	51	64
Mudpit_Aged L3_4 Posterior NP IAF	Vimentin OS=Homo sapiens GN=VIM PE=1 SV=4	P08670,V9HWE1	HEL113,VIM	53652.7	11	14	22	VELQELNDR	K	F	0.997	36.4	25.8	15.9	35.8	0	1	0	0	2	1115.57	4203.85	14420500	105	113
Mudpit_Aged L3_4 Posterior NP IAF	Vimentin OS=Homo sapiens GN=VIM PE=1 SV=4	P08670,V9HWE1	HEL113,VIM	53652.7	11	14	22	VESLQEEIAFLK	K	K	0.997	69.2	27	25.3	61.2	0	2	0	0	2	1405.76	8538.59	39711200	224	235
Mudpit_Aged L3_4 Posterior NP IAF	Annexin A5 OS=Homo sapiens GN=ANXA5 PE=1 SV=2	P08758,V9HWE0	ANXA5,HEL-S-7	35938.6	9	10	13	ETSGNLEQLLLAVVK	R	S	0.997	99.3	25.3	19.2	99.3	0	1	0	0	2	1613.91	9488.58	9016200	228	242
Mudpit_Aged L3_4 Posterior NP IAF	Annexin A5 OS=Homo sapiens GN=ANXA5 PE=1 SV=2	P08758,V9HWE0	ANXA5,HEL-S-7	35938.6	9	10	13	FITIFGTR	K	S	0.99	37.8	25	20.2	33	0	1	0	0	2	954.541	7132.64	19163200	194	201
Mudpit_Aged L3_4 Posterior NP IAF	Annexin A5 OS=Homo sapiens GN=ANXA5 PE=1 SV=2	P08758,V9HWE0	ANXA5,HEL-S-7	35938.6	9	10	13	GTVTDFPGFDER	R	A	0.997	66.5	25	17.2	66.5	0	2	0	0	2	1340.61	6369.46	51283100	7	18
Mudpit_Aged L3_4 Posterior NP IAF	Annexin A5 OS=Homo sapiens GN=ANXA5 PE=1 SV=2	P08758,V9HWE0	ANXA5,HEL-S-7	35938.6	9	10	13	QEISAAFK	R	T	0.99	41.4	26.7	22.7	34.2	0	1	0	0	2	893.473	3123.1	15789600	51	58
Mudpit_Aged L3_4 Posterior NP IAF	Annexin A5 OS=Homo sapiens GN=ANXA5 PE=1 SV=2	P08758,V9HWE0	ANXA5,HEL-S-7	35938.6	9	10	13	QVYEEEYGSSLEDDVVGDTSGYYQR	K	M	0.997	113	25	20.1	113	0	1	1	0	2	2888.24	7926.33	6640710	127	151
Mudpit_Aged L3_4 Posterior NP IAF	Annexin A5 OS=Homo sapiens GN=ANXA5 PE=1 SV=2	P08758,V9HWE0	ANXA5,HEL-S-7	35938.6	9	10	13	SEIDLFNIR	R	K	0.997	58.8	27.2	20.2	55.2	0	2	0	0	2	1106.58	8152.85	29157600	277	285
Mudpit_Aged L3_4 Posterior NP IAF	Annexin A5 OS=Homo sapiens GN=ANXA5 PE=1 SV=2	P08758,V9HWE0	ANXA5,HEL-S-7	35938.6	9	10	13	SIPAYLAETLYYAMK	R	G	0.985	42.8	27.5	15.7	42.8	0	0	1	0	2	1733.88	9415.89	7468150	246	260
Mudpit_Aged L3_4 Posterior NP IAF	Annexin A5 OS=Homo sapiens GN=ANXA5 PE=1 SV=2	P08758,V9HWE0	ANXA5,HEL-S-7	35938.6	9	10	13	VLTEIIASR	K	T	0.997	59.3	26.2	17.6	58.4	0	2	0	0	2	1001.6	5286.49	25193100	109	117
Mudpit_Aged L3_4 Posterior NP IAF	Annexin A5 OS=Homo sapiens GN=ANXA5 PE=1 SV=2	P08758,V9HWE0	ANXA5,HEL-S-7	35938.6	9	10	13	YMTISGFQIEETIDR	K	E	0.997	54.6	25.1	16.4	54.6	0	1	0	0	2	1818.86	7951.87	2565090	213	227
Mudpit_Aged L3_4 Posterior NP IAF	Testis tissue sperm-binding protein Li 94mP OS=Homo sapiens PE=2 SV=1	A0A140VKH7_HUMAN,O00339	MATN2	106836	6	7	8	AAIVFTDGR	R	A	0.997	54.6	27	16.4	54.6	0	1	0	0	2	949.51	3927.24	11047800	762	770
Mudpit_Aged L3_4 Posterior NP IAF	Testis tissue sperm-binding protein Li 94mP OS=Homo sapiens PE=2 SV=1	A0A140VKH7_HUMAN,O00339	MATN2	106836	6	7	8	AIEEELQEIASEPTNK	K	H	0.997	76.6	25.9	17.8	76.6	0	1	1	0	2	1800.89	7135.84	9051720	797	812
Mudpit_Aged L3_4 Posterior NP IAF	Testis tissue sperm-binding protein Li 94mP OS=Homo sapiens PE=2 SV=1	A0A140VKH7_HUMAN,O00339	MATN2	106836	6	7	8	AQDDVSEWASK	R	A	0.997	45.7	25	15.9	45.7	0	1	0	0	2	1235.55	3873.5	2964680	771	781
Mudpit_Aged L3_4 Posterior NP IAF	Testis tissue sperm-binding protein Li 94mP OS=Homo sapiens PE=2 SV=1	A0A140VKH7_HUMAN,O00339	MATN2	106836	6	7	8	QFVTGIIDSLTISPK	K	A	0.994	36.8	25	15.3	36.8	0	1	0	0	2	1618.91	8706.76	1888100	676	690
Mudpit_Aged L3_4 Posterior NP IAF	Testis tissue sperm-binding protein Li 94mP OS=Homo sapiens PE=2 SV=1	A0A140VKH7_HUMAN,O00339	MATN2	106836	6	7	8	VGLLQYGSTVK	R	N	0.997	45.1	25.8	21.2	39.7	0	2	0	0	2	1164.66	5858.73	10298600	96	106
Mudpit_Aged L3_4 Posterior NP IAF	Testis tissue sperm-binding protein Li 94mP OS=Homo sapiens PE=2 SV=1	A0A140VKH7_HUMAN,O00339	MATN2	106836	6	7	8	YLFEEDNLLR	R	S	0.981	28.9	26.6	14.8	28.9	0	1	0	0	2	1311.66	8098.2	5355770	884	893
Mudpit_Aged L3_4 Posterior NP IAF	Alpha-1B-glycoprotein OS=Homo sapiens GN=A1BG PE=1 SV=4	P04217,V9HWD8	A1BG,HEL-S-163pA	54253.3	7	10	27	ATWSGAVLAGR	R	D	0.997	61.3	28.4	16.8	61.3	0	4	0	0	2	1088.58	5393.71	51619800	407	417
Mudpit_Aged L3_4 Posterior NP IAF	Alpha-1B-glycoprotein OS=Homo sapiens GN=A1BG PE=1 SV=4	P04217,V9HWD8	A1BG,HEL-S-163pA	54253.3	7	10	27	CLAPLEGAR	R	F	0.982	27.7	25	14.7	27.7	0	1	0	0	2	987.493	4237.94	6351070	325	333
Mudpit_Aged L3_4 Posterior NP IAF	Alpha-1B-glycoprotein OS=Homo sapiens GN=A1BG PE=1 SV=4	P04217,V9HWD8	A1BG,HEL-S-163pA	54253.3	7	10	27	HQFLLTGDTQGR	K	Y	0.997	70.4	25.9	17.4	70.4	0	4	5	0	2	1372.7	5494.41	61863500	79	90
Mudpit_Aged L3_4 Posterior NP IAF	Alpha-1B-glycoprotein OS=Homo sapiens GN=A1BG PE=1 SV=4	P04217,V9HWD8	A1BG,HEL-S-163pA	54253.3	7	10	27	LLELTGPK	K	S	0.99	44.2	25	15.8	44.2	0	5	0	0	2	870.53	4701.53	78551900	107	114
Mudpit_Aged L3_4 Posterior NP IAF	Alpha-1B-glycoprotein OS=Homo sapiens GN=A1BG PE=1 SV=4	P04217,V9HWD8	A1BG,HEL-S-163pA	54253.3	7	10	27	SGLSTGWTQLSK	R	L	0.997	87.7	27	20.2	86	0	3	0	0	2	1264.65	5717.15	48868500	95	106
Mudpit_Aged L3_4 Posterior NP IAF	Alpha-1B-glycoprotein OS=Homo sapiens GN=A1BG PE=1 SV=4	P04217,V9HWD8	A1BG,HEL-S-163pA	54253.3	7	10	27	SLPAPWLSMAPVSWITPGLK	K	T	0.997	66.2	25	17.1	66.2	0	1	1	0	2	2151.17	9476.62	16444900	115	134
Mudpit_Aged L3_4 Posterior NP IAF	Alpha-1B-glycoprotein OS=Homo sapiens GN=A1BG PE=1 SV=4	P04217,V9HWD8	A1BG,HEL-S-163pA	54253.3	7	10	27	TPGAAANLELIFVGPQHAGNYR	R	C	0.997	86.9	26.4	18.4	86.9	0	1	2	0	2	2296.18	9256.39	41871000	448	469
Mudpit_Aged L3_4 Posterior NP IAF	cDNA FLJ50065, highly similar to MAM domain-containing protein 2 OS=Homo sapiens PE=2 SV=1	B4E320,Q7Z304	MAMDC2	77557.2	3	3	3	FEDESFDR	R	L	0.99	39.8	25	15.5	39.8	0	1	0	0	2	1044.43	3378.14	3216790	106	113
Mudpit_Aged L3_4 Posterior NP IAF	cDNA FLJ50065, highly similar to MAM domain-containing protein 2 OS=Homo sapiens PE=2 SV=1	B4E320,Q7Z304	MAMDC2	77557.2	3	3	3	IWSVLESPR	K	G	0.96	29.7	27.1	14.9	29.7	0	1	0	0	2	1086.59	6881.4	4560110	443	451
Mudpit_Aged L3_4 Posterior NP IAF	cDNA FLJ50065, highly similar to MAM domain-containing protein 2 OS=Homo sapiens PE=2 SV=1	B4E320,Q7Z304	MAMDC2	77557.2	3	3	3	SDIAIDDVK	R	F	0.997	59	26.8	16.7	59	0	1	0	0	2	975.5	3891.94	4004350	650	658
Mudpit_Aged L3_4 Posterior NP IAF	Cartilage intermediate layer protein 1 OS=Homo sapiens GN=CILP PE=1 SV=4	O75339	CILP	132565	26	37	186	AETPYMVMNPETK	R	A	0.997	76.4	25	17.8	37.7	0	32	4	0	2	1526.69	4379.06	484412000	306	318
Mudpit_Aged L3_4 Posterior NP IAF	Cartilage intermediate layer protein 1 OS=Homo sapiens GN=CILP PE=1 SV=4	O75339	CILP	132565	26	37	186	AQSDAGAVK	K	S	0.997	46.8	26.9	22.5	40.3	0	1	0	0	2	846.432	1212.79	325597	378	386
Mudpit_Aged L3_4 Posterior NP IAF	Cartilage intermediate layer protein 1 OS=Homo sapiens GN=CILP PE=1 SV=4	O75339	CILP	132565	26	37	186	ASVTFLDPR	K	N	0.997	64.5	28	23	58.6	0	7	0	0	2	1005.54	5582.15	139777000	622	630
Mudpit_Aged L3_4 Posterior NP IAF	Cartilage intermediate layer protein 1 OS=Homo sapiens GN=CILP PE=1 SV=4	O75339	CILP	132565	26	37	186	CSGMLYDQDR	K	V	0.997	56.7	25	16.5	56.7	0	1	0	0	2	1245.49	3752.65	5658790	1010	1019
Mudpit_Aged L3_4 Posterior NP IAF	Cartilage intermediate layer protein 1 OS=Homo sapiens GN=CILP PE=1 SV=4	O75339	CILP	132565	26	37	186	DEVTSEPLNAGK	R	V	0.997	51	25	16.2	51	0	4	0	0	2	1259.61	2766.13	135762000	666	677
Mudpit_Aged L3_4 Posterior NP IAF	Cartilage intermediate layer protein 1 OS=Homo sapiens GN=CILP PE=1 SV=4	O75339	CILP	132565	26	37	186	EIQCSGYTLPTK	R	V	0.997	47.5	25	16	47.5	0	1	0	0	2	1397.66	4559.57	7118470	464	475
Mudpit_Aged L3_4 Posterior NP IAF	Cartilage intermediate layer protein 1 OS=Homo sapiens GN=CILP PE=1 SV=4	O75339	CILP	132565	26	37	186	FAPIVLTMPK	K	T	0.997	44.9	26	15.8	44.9	0	5	0	0	2	1116.65	6508.07	130160000	282	291
Mudpit_Aged L3_4 Posterior NP IAF	Cartilage intermediate layer protein 1 OS=Homo sapiens GN=CILP PE=1 SV=4	O75339	CILP	132565	26	37	186	FGHVYMGNSR	R	V	0.956	33.6	25	15.1	33.6	0	0	1	0	2	1167.54	5505.82	3372500	507	516
Mudpit_Aged L3_4 Posterior NP IAF	Cartilage intermediate layer protein 1 OS=Homo sapiens GN=CILP PE=1 SV=4	O75339	CILP	132565	26	37	186	FLPSEQIQGVVISVINLEPR	R	T	0.997	111	25	20	111	0	9	26	0	2	2238.25	9837.8	206603000	764	783
Mudpit_Aged L3_4 Posterior NP IAF	Cartilage intermediate layer protein 1 OS=Homo sapiens GN=CILP PE=1 SV=4	O75339	CILP	132565	26	37	186	FNPNAIGVPQPYLNK	K	L	0.997	48.8	31.9	16	48.8	0	2	0	0	2	1671.89	7028.19	92756200	842	856
Mudpit_Aged L3_4 Posterior NP IAF	Cartilage intermediate layer protein 1 OS=Homo sapiens GN=CILP PE=1 SV=4	O75339	CILP	132565	26	37	186	FYQIEGDR	R	Y	0.99	37.2	25	27.9	24.6	0	6	0	0	2	1027.48	3614.41	205429000	914	921
Mudpit_Aged L3_4 Posterior NP IAF	Cartilage intermediate layer protein 1 OS=Homo sapiens GN=CILP PE=1 SV=4	O75339	CILP	132565	26	37	186	GSAVFHEIK	K	M	0.997	78.3	27.1	17.9	78.3	0	4	0	0	2	987.526	4050.55	106308000	561	569
Mudpit_Aged L3_4 Posterior NP IAF	Cartilage intermediate layer protein 1 OS=Homo sapiens GN=CILP PE=1 SV=4	O75339	CILP	132565	26	37	186	GTFTLHVPQDTER	K	L	0.997	85.4	26.3	18.3	85.4	0	10	6	0	2	1500.74	5259.6	915407000	524	536
Mudpit_Aged L3_4 Posterior NP IAF	Cartilage intermediate layer protein 1 OS=Homo sapiens GN=CILP PE=1 SV=4	O75339	CILP	132565	26	37	186	IVGPLEVNVR	K	S	0.997	49.5	25	16.1	49.5	0	6	0	0	2	1095.65	6053.54	542974000	960	969
Mudpit_Aged L3_4 Posterior NP IAF	Cartilage intermediate layer protein 1 OS=Homo sapiens GN=CILP PE=1 SV=4	O75339	CILP	132565	26	37	186	LFNLDVPESR	R	R	0.997	52.4	26.8	20.9	47.8	0	4	0	0	2	1189.62	6996.89	86122400	741	750
Mudpit_Aged L3_4 Posterior NP IAF	Cartilage intermediate layer protein 1 OS=Homo sapiens GN=CILP PE=1 SV=4	O75339	CILP	132565	26	37	186	LLTQTDSDGR	K	F	0.997	38.5	27.3	15.4	38.5	0	2	0	0	2	1105.55	1894.52	3237680	252	261
Mudpit_Aged L3_4 Posterior NP IAF	Cartilage intermediate layer protein 1 OS=Homo sapiens GN=CILP PE=1 SV=4	O75339	CILP	132565	26	37	186	LVLTFVDR	R	L	0.99	56.2	25.1	16.5	56.2	0	9	0	0	2	962.567	6874.93	1064530000	537	544
Mudpit_Aged L3_4 Posterior NP IAF	Cartilage intermediate layer protein 1 OS=Homo sapiens GN=CILP PE=1 SV=4	O75339	CILP	132565	26	37	186	LWSLNPDTGLWEEEGDFK	K	F	0.997	110	31.1	19.9	110	0	3	1	0	2	2135.99	9161.12	82283600	698	715
Mudpit_Aged L3_4 Posterior NP IAF	Cartilage intermediate layer protein 1 OS=Homo sapiens GN=CILP PE=1 SV=4	O75339	CILP	132565	26	37	186	QSAFQYLQSTPAQSPAAGTVQGR	R	V	0.997	123	26.1	20.7	123	0	3	1	0	2	2393.18	6648.26	39024300	1127	1149
Mudpit_Aged L3_4 Posterior NP IAF	Cartilage intermediate layer protein 1 OS=Homo sapiens GN=CILP PE=1 SV=4	O75339	CILP	132565	26	37	186	QTMLTQSVR	R	R	0.997	61.2	27.7	22.3	55.7	0	1	0	0	2	1063.56	2762.7	5783380	23	31
Mudpit_Aged L3_4 Posterior NP IAF	Cartilage intermediate layer protein 1 OS=Homo sapiens GN=CILP PE=1 SV=4	O75339	CILP	132565	26	37	186	SNVGVALTFNCVER	K	Q	0.997	55.3	25.9	16.5	55.3	0	3	0	0	2	1566.76	6513.37	41094900	1109	1122
Mudpit_Aged L3_4 Posterior NP IAF	Cartilage intermediate layer protein 1 OS=Homo sapiens GN=CILP PE=1 SV=4	O75339	CILP	132565	26	37	186	TFLVGNLEIR	R	E	0.997	64.2	25.2	17	64.2	0	10	0	0	2	1161.66	8199.86	366478000	728	737
Mudpit_Aged L3_4 Posterior NP IAF	Cartilage intermediate layer protein 1 OS=Homo sapiens GN=CILP PE=1 SV=4	O75339	CILP	132565	26	37	186	TGFLSNPR	R	A	0.99	36.6	29.7	16.5	35.4	0	2	0	0	2	891.468	3784.19	20047500	784	791
Mudpit_Aged L3_4 Posterior NP IAF	Cartilage intermediate layer protein 1 OS=Homo sapiens GN=CILP PE=1 SV=4	O75339	CILP	132565	26	37	186	TTDWTPAGSTGQVVHGSPR	R	E	0.997	116	26.2	21.6	115	0	6	11	0	2	1953.94	5158.22	678643000	96	114
Mudpit_Aged L3_4 Posterior NP IAF	Cartilage intermediate layer protein 1 OS=Homo sapiens GN=CILP PE=1 SV=4	O75339	CILP	132565	26	37	186	TYGMFSVDFR	R	D	0.997	53	25	16.3	53	0	4	0	0	2	1222.56	7679.34	27015900	656	665
Mudpit_Aged L3_4 Posterior NP IAF	Cartilage intermediate layer protein 1 OS=Homo sapiens GN=CILP PE=1 SV=4	O75339	CILP	132565	26	37	186	VAQQPLIN	R	-	0.975	28.8	25	14.8	28.8	0	1	0	0	2	882.504	3446.6	13693200	1177	1184
Mudpit_Aged L3_4 Posterior NP IAF	Peptidyl-prolyl cis-trans isomerase B OS=Homo sapiens GN=PPIB PE=1 SV=2	P23284,V9HWC6	HEL-S-39,PPIB	23743.2	3	4	4	DFMIQGGDFTR	K	G	0.997	63.3	25	17	63.3	0	1	0	0	2	1286.58	6667.92	13111500	99	109
Mudpit_Aged L3_4 Posterior NP IAF	Peptidyl-prolyl cis-trans isomerase B OS=Homo sapiens GN=PPIB PE=1 SV=2	P23284,V9HWC6	HEL-S-39,PPIB	23743.2	3	4	4	VIFGLFGK	R	T	0.99	42.8	25	16.2	42.3	0	1	0	0	2	880.529	7976.49	8011030	60	67
Mudpit_Aged L3_4 Posterior NP IAF	Peptidyl-prolyl cis-trans isomerase B OS=Homo sapiens GN=PPIB PE=1 SV=2	P23284,V9HWC6	HEL-S-39,PPIB	23743.2	3	4	4	VLEGMEVVR	K	K	0.993	38.4	28.2	28.1	25.7	0	2	0	0	2	1031.56	3749.55	23984900	172	180
Mudpit_Aged L3_4 Posterior NP IAF	Moesin OS=Homo sapiens GN=MSN PE=1 SV=3	P26038,V9HWC0	HEL70,MSN	67821.8	9	9	13	ALELEQER	R	K	0.99	38.2	27.7	27.5	26.1	0	1	0	0	2	987.511	2783.76	5434970	372	379
Mudpit_Aged L3_4 Posterior NP IAF	Moesin OS=Homo sapiens GN=MSN PE=1 SV=3	P26038,V9HWC0	HEL70,MSN	67821.8	9	9	13	APDFVFYAPR	K	L	0.997	40.3	25.3	15.5	40.3	0	1	0	0	2	1182.59	7973.57	4334430	264	273
Mudpit_Aged L3_4 Posterior NP IAF	Moesin OS=Homo sapiens GN=MSN PE=1 SV=3	P26038,V9HWC0	HEL70,MSN	67821.8	9	9	13	AQMVQEDLEK	K	T	0.997	57	25.4	16.6	57	0	1	0	0	2	1190.57	3308.54	6489450	449	458
Mudpit_Aged L3_4 Posterior NP IAF	Moesin OS=Homo sapiens GN=MSN PE=1 SV=3	P26038,V9HWC0	HEL70,MSN	67821.8	9	9	13	EDAVLEYLK	R	I	0.997	79.8	25.9	18	79.8	0	2	0	0	2	1079.56	6873.66	18278200	185	193
Mudpit_Aged L3_4 Posterior NP IAF	Moesin OS=Homo sapiens GN=MSN PE=1 SV=3	P26038,V9HWC0	HEL70,MSN	67821.8	9	9	13	ESEAVEWQQK	K	A	0.997	53.2	25	16.3	53.2	0	2	0	0	2	1233.57	2819.25	6994380	439	448
Mudpit_Aged L3_4 Posterior NP IAF	Moesin OS=Homo sapiens GN=MSN PE=1 SV=3	P26038,V9HWC0	HEL70,MSN	67821.8	9	9	13	FYPEDVSEELIQDITQR	K	L	0.997	97.2	25.7	19.1	97.2	0	2	0	0	2	2082	9303.55	15238800	84	100
Mudpit_Aged L3_4 Posterior NP IAF	Moesin OS=Homo sapiens GN=MSN PE=1 SV=3	P26038,V9HWC0	HEL70,MSN	67821.8	9	9	13	IGFPWSEIR	K	N	0.996	38.3	26.5	16.3	37.3	0	2	0	0	2	1104.58	8568.57	46680900	238	246
Mudpit_Aged L3_4 Posterior NP IAF	Moesin OS=Homo sapiens GN=MSN PE=1 SV=3	P26038,V9HWC0	HEL70,MSN	67821.8	9	9	13	ISQLEMAR	R	Q	0.99	50.3	26.7	16.1	50.3	0	1	0	0	2	947.498	2976.48	11977000	428	435
Mudpit_Aged L3_4 Posterior NP IAF	Moesin OS=Homo sapiens GN=MSN PE=1 SV=3	P26038,V9HWC0	HEL70,MSN	67821.8	9	9	13	QLFDQVVK	K	T	0.97	31.9	28	22.8	24.1	0	1	0	0	2	976.546	5018.6	18878500	28	35
Mudpit_Aged L3_4 Posterior NP IAF	L-lactate dehydrogenase A chain OS=Homo sapiens GN=LDHA PE=1 SV=2	P00338,V9HWB9	HEL-S-133P,LDHA	36689.2	6	6	9	DLADELALVDVIEDK	K	L	0.997	85	26.5	18.3	85	0	1	0	0	2	1657.85	9340.18	17708800	43	57
Mudpit_Aged L3_4 Posterior NP IAF	L-lactate dehydrogenase A chain OS=Homo sapiens GN=LDHA PE=1 SV=2	P00338,V9HWB9	HEL-S-133P,LDHA	36689.2	6	6	9	GEMMDLQHGSLFLR	K	T	0.964	33.8	25.3	15.1	11.6	0	0	1	0	2	1649.78	8868.12	7077780	60	73
Mudpit_Aged L3_4 Posterior NP IAF	L-lactate dehydrogenase A chain OS=Homo sapiens GN=LDHA PE=1 SV=2	P00338,V9HWB9	HEL-S-133P,LDHA	36689.2	6	6	9	QVVESAYEVIK	K	L	0.997	63.2	26.3	17	63.2	0	2	0	0	2	1264.68	5248.24	24137100	233	243
Mudpit_Aged L3_4 Posterior NP IAF	L-lactate dehydrogenase A chain OS=Homo sapiens GN=LDHA PE=1 SV=2	P00338,V9HWB9	HEL-S-133P,LDHA	36689.2	6	6	9	SADTLWGIQK	K	E	0.997	52.6	27.4	16.3	52.6	0	1	0	0	2	1118.58	6119.66	4407250	319	328
Mudpit_Aged L3_4 Posterior NP IAF	L-lactate dehydrogenase A chain OS=Homo sapiens GN=LDHA PE=1 SV=2	P00338,V9HWB9	HEL-S-133P,LDHA	36689.2	6	6	9	VIGSGCNLDSAR	R	F	0.997	57.8	26.5	16.7	57.8	0	2	0	0	2	1249.58	2710.42	10343500	158	169
Mudpit_Aged L3_4 Posterior NP IAF	L-lactate dehydrogenase A chain OS=Homo sapiens GN=LDHA PE=1 SV=2	P00338,V9HWB9	HEL-S-133P,LDHA	36689.2	6	6	9	VTLTSEEEAR	K	L	0.997	64.9	28.3	21.3	60.7	0	2	0	0	2	1134.56	2208.83	27741800	306	315
Mudpit_Aged L3_4 Posterior NP IAF	Pyruvate kinase PKM OS=Homo sapiens GN=PKM PE=1 SV=4	P14618,V9HWB8	HEL-S-30,PKM	57937.5	8	9	9	APIIAVTR	R	N	0.99	38.1	25	18.2	35.2	0	1	0	0	2	840.53	4339.45	6576000	448	455
Mudpit_Aged L3_4 Posterior NP IAF	Pyruvate kinase PKM OS=Homo sapiens GN=PKM PE=1 SV=4	P14618,V9HWB8	HEL-S-30,PKM	57937.5	8	9	9	DPVQEAWAEDVDLR	K	V	0.997	83	25.4	18.2	83	0	1	1	0	2	1642.77	7812.64	11249100	476	489
Mudpit_Aged L3_4 Posterior NP IAF	Pyruvate kinase PKM OS=Homo sapiens GN=PKM PE=1 SV=4	P14618,V9HWB8	HEL-S-30,PKM	57937.5	8	9	9	GDLGIEIPAEK	R	V	0.996	40.4	27	21.8	34.1	0	1	0	0	2	1141.61	6399.64	3568010	295	305
Mudpit_Aged L3_4 Posterior NP IAF	Pyruvate kinase PKM OS=Homo sapiens GN=PKM PE=1 SV=4	P14618,V9HWB8	HEL-S-30,PKM	57937.5	8	9	9	GVNLPGAAVDLPAVSEK	K	D	0.997	44.6	26.2	15.8	44.6	0	1	0	0	2	1636.89	7119.98	13760600	208	224
Mudpit_Aged L3_4 Posterior NP IAF	Pyruvate kinase PKM OS=Homo sapiens GN=PKM PE=1 SV=4	P14618,V9HWB8	HEL-S-30,PKM	57937.5	8	9	9	ITLDNAYMEK	K	C	0.997	63.8	25	17	63.8	0	1	0	0	2	1197.58	4877.05	9539940	142	151
Mudpit_Aged L3_4 Posterior NP IAF	Pyruvate kinase PKM OS=Homo sapiens GN=PKM PE=1 SV=4	P14618,V9HWB8	HEL-S-30,PKM	57937.5	8	9	9	IYVDDGLISLQVK	K	Q	0.997	54.3	25	16.4	54.3	0	1	0	0	2	1462.82	8748.08	4578220	174	186
Mudpit_Aged L3_4 Posterior NP IAF	Pyruvate kinase PKM OS=Homo sapiens GN=PKM PE=1 SV=4	P14618,V9HWB8	HEL-S-30,PKM	57937.5	8	9	9	LDIDSPPITAR	R	N	0.997	42	26.4	15.6	42	0	1	0	0	2	1197.65	5471.29	36636100	33	43
Mudpit_Aged L3_4 Posterior NP IAF	Pyruvate kinase PKM OS=Homo sapiens GN=PKM PE=1 SV=4	P14618,V9HWB8	HEL-S-30,PKM	57937.5	8	9	9	RFDEILEASDGIMVAR	R	G	0.965	40	30.6	15.5	40	0	0	1	0	2	1837.91	7246.58	6473340	279	294
Mudpit_Aged L3_4 Posterior NP IAF	78 kDa glucose-regulated protein OS=Homo sapiens GN=HSPA5 PE=1 SV=2	P11021,V9HWB4	HEL-S-89n,HSPA5	72334.7	7	8	10	ETAEAYLGK	K	K	0.997	73.2	27.1	25.4	65.3	0	1	0	0	2	981.489	2780.17	9935320	155	163
Mudpit_Aged L3_4 Posterior NP IAF	78 kDa glucose-regulated protein OS=Homo sapiens GN=HSPA5 PE=1 SV=2	P11021,V9HWB4	HEL-S-89n,HSPA5	72334.7	7	8	10	FEELNMDLFR	K	S	0.997	62.2	25	16.9	62.2	0	1	0	0	2	1313.62	9067.91	10531000	327	336
Mudpit_Aged L3_4 Posterior NP IAF	78 kDa glucose-regulated protein OS=Homo sapiens GN=HSPA5 PE=1 SV=2	P11021,V9HWB4	HEL-S-89n,HSPA5	72334.7	7	8	10	IINEPTAAAIAYGLDK	R	R	0.997	72.3	26.5	17.5	72.3	0	1	1	0	2	1659.9	8056.92	8571880	198	213
Mudpit_Aged L3_4 Posterior NP IAF	78 kDa glucose-regulated protein OS=Homo sapiens GN=HSPA5 PE=1 SV=2	P11021,V9HWB4	HEL-S-89n,HSPA5	72334.7	7	8	10	ITPSYVAFTPEGER	R	L	0.997	47.9	29.3	16	47.9	0	1	0	0	2	1566.78	5963.3	10810600	61	74
Mudpit_Aged L3_4 Posterior NP IAF	78 kDa glucose-regulated protein OS=Homo sapiens GN=HSPA5 PE=1 SV=2	P11021,V9HWB4	HEL-S-89n,HSPA5	72334.7	7	8	10	LTPEEIER	R	M	0.985	32.5	25.1	28.8	0	0	2	0	0	2	986.515	3226.87	9272340	533	540
Mudpit_Aged L3_4 Posterior NP IAF	78 kDa glucose-regulated protein OS=Homo sapiens GN=HSPA5 PE=1 SV=2	P11021,V9HWB4	HEL-S-89n,HSPA5	72334.7	7	8	10	TWNDPSVQQDIK	R	F	0.997	44.1	25.5	16.1	43.8	0	1	0	0	2	1430.69	4620.62	4643320	102	113
Mudpit_Aged L3_4 Posterior NP IAF	78 kDa glucose-regulated protein OS=Homo sapiens GN=HSPA5 PE=1 SV=2	P11021,V9HWB4	HEL-S-89n,HSPA5	72334.7	7	8	10	VEIIANDQGNR	R	I	0.997	62.9	26	18.7	0	0	2	0	0	2	1228.63	2525.7	8356930	50	60
Mudpit_Aged L3_4 Posterior NP IAF	Mannose-binding protein C OS=Homo sapiens GN=MBL2 PE=1 SV=2	P11226	MBL2	26144.1	4	4	4	EEAFLGITDEK	K	T	0.958	26	25.2	14.6	26	0	1	0	0	2	1251.61	6304.73	3681600	180	190
Mudpit_Aged L3_4 Posterior NP IAF	Mannose-binding protein C OS=Homo sapiens GN=MBL2 PE=1 SV=2	P11226	MBL2	26144.1	4	4	4	FQASVATPR	K	N	0.997	43.4	26.9	15.7	43.4	0	1	0	0	2	976.521	2736.41	1880900	158	166
Mudpit_Aged L3_4 Posterior NP IAF	Mannose-binding protein C OS=Homo sapiens GN=MBL2 PE=1 SV=2	P11226	MBL2	26144.1	4	4	4	SPDGDSSLAASER	K	K	0.997	66.4	25	17.2	66.4	0	1	0	0	2	1291.58	1924.31	2237610	100	112
Mudpit_Aged L3_4 Posterior NP IAF	Mannose-binding protein C OS=Homo sapiens GN=MBL2 PE=1 SV=2	P11226	MBL2	26144.1	4	4	4	TEGQFVDLTGNR	K	L	0.997	48.7	26	16	48.7	0	1	0	0	2	1336.65	4945.74	18550300	191	202
Mudpit_Aged L3_4 Posterior NP IAF	Phosphatidylinositol-glycan-specific phospholipase D OS=Homo sapiens GN=GPLD1 PE=1 SV=3	P80108	GPLD1	92338.9	6	6	9	AQYVLISPEASSR	K	F	0.997	50.8	26.7	16.2	50.8	0	1	0	0	2	1420.74	5156.8	9750050	787	799
Mudpit_Aged L3_4 Posterior NP IAF	Phosphatidylinositol-glycan-specific phospholipase D OS=Homo sapiens GN=GPLD1 PE=1 SV=3	P80108	GPLD1	92338.9	6	6	9	DLLGIYEK	K	L	0.955	28.1	27.6	18.5	24.3	0	1	0	0	2	950.519	6489.35	9992260	188	195
Mudpit_Aged L3_4 Posterior NP IAF	Phosphatidylinositol-glycan-specific phospholipase D OS=Homo sapiens GN=GPLD1 PE=1 SV=3	P80108	GPLD1	92338.9	6	6	9	GIVAAFYSGPSLSDK	K	E	0.997	45.7	26.9	15.9	45.7	0	1	0	0	2	1511.77	7677.01	5158940	545	559
Mudpit_Aged L3_4 Posterior NP IAF	Phosphatidylinositol-glycan-specific phospholipase D OS=Homo sapiens GN=GPLD1 PE=1 SV=3	P80108	GPLD1	92338.9	6	6	9	IADVTSGLIGGEDGR	R	V	0.997	76.7	26.4	17.8	76.7	0	2	0	0	2	1459.74	5766.32	24181400	743	757
Mudpit_Aged L3_4 Posterior NP IAF	Phosphatidylinositol-glycan-specific phospholipase D OS=Homo sapiens GN=GPLD1 PE=1 SV=3	P80108	GPLD1	92338.9	6	6	9	ILEGFQPSGR	R	F	0.997	58	28.2	28.9	45.7	0	2	0	0	2	1103.58	4592.91	12277700	440	449
Mudpit_Aged L3_4 Posterior NP IAF	Phosphatidylinositol-glycan-specific phospholipase D OS=Homo sapiens GN=GPLD1 PE=1 SV=3	P80108	GPLD1	92338.9	6	6	9	QVLLVGAPTYDDVSK	K	V	0.997	78.6	27.3	17.9	78.6	0	2	0	0	2	1604.85	6650.88	18463400	664	678
Mudpit_Aged L3_4 Posterior NP IAF	Complement C3 OS=Homo sapiens GN=C3 PE=1 SV=2	P01024,V9HWA9	C3,HEL-S-62p	187149	57	104	522	AAVYHHFISDGVR	K	K	0.993	48.6	27	16	48.6	0	0	8	11	2	1471.74	9638.54	69644000	914	926
Mudpit_Aged L3_4 Posterior NP IAF	Complement C3 OS=Homo sapiens GN=C3 PE=1 SV=2	P01024,V9HWA9	C3,HEL-S-62p	187149	57	104	522	AGDFLEANYMNLQR	K	S	0.997	77.5	25	17.8	77.5	0	11	3	0	2	1657.76	6759.05	330052000	1172	1185
Mudpit_Aged L3_4 Posterior NP IAF	Complement C3 OS=Homo sapiens GN=C3 PE=1 SV=2	P01024,V9HWA9	C3,HEL-S-62p	187149	57	104	522	APSTWLTAYVVK	R	V	0.997	92.1	27.8	18.8	92.1	0	4	1	0	2	1335.73	8583.09	95222700	1073	1084
Mudpit_Aged L3_4 Posterior NP IAF	Complement C3 OS=Homo sapiens GN=C3 PE=1 SV=2	P01024,V9HWA9	C3,HEL-S-62p	187149	57	104	522	AYYENSPQQVFSTEFEVK	R	E	0.997	109	25	26.1	102	0	7	3	0	2	2166	7912.4	133400000	208	225
Mudpit_Aged L3_4 Posterior NP IAF	Complement C3 OS=Homo sapiens GN=C3 PE=1 SV=2	P01024,V9HWA9	C3,HEL-S-62p	187149	57	104	522	DAPDHQELNLDVSLQLPSR	K	S	0.997	106	26.7	19.6	106	0	1	2	0	2	2147.07	7782.91	54077200	1285	1303
Mudpit_Aged L3_4 Posterior NP IAF	Complement C3 OS=Homo sapiens GN=C3 PE=1 SV=2	P01024,V9HWA9	C3,HEL-S-62p	187149	57	104	522	DFDFVPPVVR	K	W	0.996	38	27.5	15.4	38	0	5	0	0	2	1190.62	8707.56	126222000	1245	1254
Mudpit_Aged L3_4 Posterior NP IAF	Complement C3 OS=Homo sapiens GN=C3 PE=1 SV=2	P01024,V9HWA9	C3,HEL-S-62p	187149	57	104	522	DICEEQVNSLPGSITK	K	A	0.997	51.6	28.3	16.2	51.6	0	5	0	0	2	1790.85	6128.66	27091500	1156	1171
Mudpit_Aged L3_4 Posterior NP IAF	Complement C3 OS=Homo sapiens GN=C3 PE=1 SV=2	P01024,V9HWA9	C3,HEL-S-62p	187149	57	104	522	DSITTWEILAVSMSDK	K	K	0.997	75.6	26.1	17.7	75.6	0	5	0	0	2	1811.87	9124.4	40295400	797	812
Mudpit_Aged L3_4 Posterior NP IAF	Complement C3 OS=Homo sapiens GN=C3 PE=1 SV=2	P01024,V9HWA9	C3,HEL-S-62p	187149	57	104	522	DTWVEHWPEEDECQDEENQK	K	Q	0.992	48.1	25	16	48.1	0	1	0	0	2	2604.01	6925.33	1070060	1625	1644
Mudpit_Aged L3_4 Posterior NP IAF	Complement C3 OS=Homo sapiens GN=C3 PE=1 SV=2	P01024,V9HWA9	C3,HEL-S-62p	187149	57	104	522	DYAGVFSDAGLTFTSSSGQQTAQR	K	A	0.997	154	25	22.6	154	0	9	7	0	2	2494.15	8740.65	49165900	634	657
Mudpit_Aged L3_4 Posterior NP IAF	Complement C3 OS=Homo sapiens GN=C3 PE=1 SV=2	P01024,V9HWA9	C3,HEL-S-62p	187149	57	104	522	EDIPPADLSDQVPDTESETR	K	I	0.997	106	25	19.6	106	0	22	15	0	2	2214	5984.29	472248000	960	979
Mudpit_Aged L3_4 Posterior NP IAF	Complement C3 OS=Homo sapiens GN=C3 PE=1 SV=2	P01024,V9HWA9	C3,HEL-S-62p	187149	57	104	522	ENEGFTVTAEGK	K	G	0.997	65.7	25	17.1	65.7	0	5	0	0	2	1281.6	3239.08	25890800	1326	1337
Mudpit_Aged L3_4 Posterior NP IAF	Complement C3 OS=Homo sapiens GN=C3 PE=1 SV=2	P01024,V9HWA9	C3,HEL-S-62p	187149	57	104	522	EPGQDLVVLPLSITTDFIPSFR	R	L	0.997	76	25	17.7	76	0	5	5	0	2	2444.31	9562.63	110203000	509	530
Mudpit_Aged L3_4 Posterior NP IAF	Complement C3 OS=Homo sapiens GN=C3 PE=1 SV=2	P01024,V9HWA9	C3,HEL-S-62p	187149	57	104	522	EVVADSVWVDVK	R	D	0.997	93.1	28	18.8	93.1	0	12	0	0	2	1345.7	6821.12	435916000	545	556
Mudpit_Aged L3_4 Posterior NP IAF	Complement C3 OS=Homo sapiens GN=C3 PE=1 SV=2	P01024,V9HWA9	C3,HEL-S-62p	187149	57	104	522	EYVLPSFEVIVEPTEK	K	F	0.997	72.4	26.7	17.5	72.4	0	5	1	0	2	1878.97	9132.41	333484000	226	241
Mudpit_Aged L3_4 Posterior NP IAF	Complement C3 OS=Homo sapiens GN=C3 PE=1 SV=2	P01024,V9HWA9	C3,HEL-S-62p	187149	57	104	522	FVTVQATFGTQVVEK	K	V	0.997	62.8	26	16.9	62.8	0	7	0	0	2	1653.88	8097.55	17270500	105	119
Mudpit_Aged L3_4 Posterior NP IAF	Complement C3 OS=Homo sapiens GN=C3 PE=1 SV=2	P01024,V9HWA9	C3,HEL-S-62p	187149	57	104	522	FYYIYNEK	K	G	0.95	23.6	25	20.9	17.1	0	1	0	0	2	1139.54	5220.48	10969800	242	249
Mudpit_Aged L3_4 Posterior NP IAF	Complement C3 OS=Homo sapiens GN=C3 PE=1 SV=2	P01024,V9HWA9	C3,HEL-S-62p	187149	57	104	522	GLEVTITAR	K	F	0.997	46.1	28	19.4	42.6	0	10	0	0	2	959.552	4474.91	134931000	250	258
Mudpit_Aged L3_4 Posterior NP IAF	Complement C3 OS=Homo sapiens GN=C3 PE=1 SV=2	P01024,V9HWA9	C3,HEL-S-62p	187149	57	104	522	GQGTLSVVTMYHAK	K	A	0.997	63.3	27	17	63.3	0	2	5	0	2	1491.76	5468.89	41283900	1338	1351
Mudpit_Aged L3_4 Posterior NP IAF	Complement C3 OS=Homo sapiens GN=C3 PE=1 SV=2	P01024,V9HWA9	C3,HEL-S-62p	187149	57	104	522	GYTQQLAFR	K	Q	0.997	47.3	26.5	20.2	43.1	0	6	0	0	2	1083.56	4504.55	165206000	1052	1060
Mudpit_Aged L3_4 Posterior NP IAF	Complement C3 OS=Homo sapiens GN=C3 PE=1 SV=2	P01024,V9HWA9	C3,HEL-S-62p	187149	57	104	522	HQQTVTIPPK	R	S	0.997	44.1	26.6	15.8	44.1	0	2	2	0	2	1148.64	3034.34	16636900	882	891
Mudpit_Aged L3_4 Posterior NP IAF	Complement C3 OS=Homo sapiens GN=C3 PE=1 SV=2	P01024,V9HWA9	C3,HEL-S-62p	187149	57	104	522	IHWESASLLR	R	S	0.992	53.3	25.1	39.8	29.8	0	0	1	0	2	1211.65	8895.96	12366500	1311	1320
Mudpit_Aged L3_4 Posterior NP IAF	Complement C3 OS=Homo sapiens GN=C3 PE=1 SV=2	P01024,V9HWA9	C3,HEL-S-62p	187149	57	104	522	ILLQGTPVAQMTEDAVDAER	R	L	0.997	138	26.7	21.6	138	0	32	24	0	2	2157.09	7766.56	1819790000	980	999
Mudpit_Aged L3_4 Posterior NP IAF	Complement C3 OS=Homo sapiens GN=C3 PE=1 SV=2	P01024,V9HWA9	C3,HEL-S-62p	187149	57	104	522	IPIEDGSGEVVLSR	R	K	0.997	97.1	26	19.1	97.1	0	13	1	0	2	1470.78	5787.96	807498000	291	304
Mudpit_Aged L3_4 Posterior NP IAF	Complement C3 OS=Homo sapiens GN=C3 PE=1 SV=2	P01024,V9HWA9	C3,HEL-S-62p	187149	57	104	522	ISLPESLK	R	R	0.99	46.3	26.5	32	30.1	0	4	0	0	2	886.524	5246.85	142064000	282	289
Mudpit_Aged L3_4 Posterior NP IAF	Complement C3 OS=Homo sapiens GN=C3 PE=1 SV=2	P01024,V9HWA9	C3,HEL-S-62p	187149	57	104	522	KQELSEAEQATR	K	T	0.997	73.9	27.9	21.9	69.6	0	1	1	0	2	1389.7	2910.75	157527000	428	439
Mudpit_Aged L3_4 Posterior NP IAF	Complement C3 OS=Homo sapiens GN=C3 PE=1 SV=2	P01024,V9HWA9	C3,HEL-S-62p	187149	57	104	522	LESEETMVLEAHDAQGDVPVTVTVHDFPGK	R	K	0.995	60.2	25.1	16.8	60.2	0	0	3	7	2	3266.55	8875.46	221326000	36	65
Mudpit_Aged L3_4 Posterior NP IAF	Complement C3 OS=Homo sapiens GN=C3 PE=1 SV=2	P01024,V9HWA9	C3,HEL-S-62p	187149	57	104	522	LVAYYTLIGASGQR	R	E	0.997	79.9	26.4	18	79.9	0	7	3	0	2	1511.82	7136.28	139033000	531	544
Mudpit_Aged L3_4 Posterior NP IAF	Complement C3 OS=Homo sapiens GN=C3 PE=1 SV=2	P01024,V9HWA9	C3,HEL-S-62p	187149	57	104	522	NTLIIYLDK	R	V	0.997	41.6	25	15.6	41.6	0	3	0	0	2	1092.63	6658.02	187324000	1442	1450
Mudpit_Aged L3_4 Posterior NP IAF	Complement C3 OS=Homo sapiens GN=C3 PE=1 SV=2	P01024,V9HWA9	C3,HEL-S-62p	187149	57	104	522	QDSLSSQNQLGVLPLSWDIPELVNMGQWK	K	I	0.995	63.4	25.1	17	63.4	0	0	2	0	2	3282.65	9496.44	9954580	177	205
Mudpit_Aged L3_4 Posterior NP IAF	Complement C3 OS=Homo sapiens GN=C3 PE=1 SV=2	P01024,V9HWA9	C3,HEL-S-62p	187149	57	104	522	QELSEAEQATR	K	T	0.997	60.9	25	16.8	60.9	0	4	0	0	2	1261.6	2140.07	34205800	429	439
Mudpit_Aged L3_4 Posterior NP IAF	Complement C3 OS=Homo sapiens GN=C3 PE=1 SV=2	P01024,V9HWA9	C3,HEL-S-62p	187149	57	104	522	QGALELIK	R	K	0.99	57.9	27.5	63.6	10.9	0	4	0	0	2	871.525	4912	154237000	1043	1050
Mudpit_Aged L3_4 Posterior NP IAF	Complement C3 OS=Homo sapiens GN=C3 PE=1 SV=2	P01024,V9HWA9	C3,HEL-S-62p	187149	57	104	522	QKPDGVFQEDAPVIHQEMIGGLR	K	N	0.996	61	26	16.8	61	0	0	4	1	2	2564.29	8130.34	109542000	1112	1134
Mudpit_Aged L3_4 Posterior NP IAF	Complement C3 OS=Homo sapiens GN=C3 PE=1 SV=2	P01024,V9HWA9	C3,HEL-S-62p	187149	57	104	522	QPSSAFAAFVK	R	R	0.997	56.2	26.7	18	54.6	0	2	0	0	2	1152.6	6264.66	22243000	1061	1071
Mudpit_Aged L3_4 Posterior NP IAF	Complement C3 OS=Homo sapiens GN=C3 PE=1 SV=2	P01024,V9HWA9	C3,HEL-S-62p	187149	57	104	522	QPVPGQQMTLK	R	I	0.997	56.7	26.1	16.5	56.7	0	12	0	0	2	1242.65	2393.27	63072400	574	584
Mudpit_Aged L3_4 Posterior NP IAF	Complement C3 OS=Homo sapiens GN=C3 PE=1 SV=2	P01024,V9HWA9	C3,HEL-S-62p	187149	57	104	522	RIPIEDGSGEVVLSR	K	K	0.997	84.2	25.5	23.8	78.7	0	2	6	0	2	1626.88	6290.79	165609000	290	304
Mudpit_Aged L3_4 Posterior NP IAF	Complement C3 OS=Homo sapiens GN=C3 PE=1 SV=2	P01024,V9HWA9	C3,HEL-S-62p	187149	57	104	522	SEETKENEGFTVTAEGK	R	G	0.997	119	25	20.4	119	0	2	2	0	2	1855.86	4494.62	28175000	1321	1337
Mudpit_Aged L3_4 Posterior NP IAF	Complement C3 OS=Homo sapiens GN=C3 PE=1 SV=2	P01024,V9HWA9	C3,HEL-S-62p	187149	57	104	522	SEFPESWLWNVEDLK	R	E	0.997	68	26.1	17.3	68	0	2	0	0	2	1878.89	9453.23	26085300	765	779
Mudpit_Aged L3_4 Posterior NP IAF	Complement C3 OS=Homo sapiens GN=C3 PE=1 SV=2	P01024,V9HWA9	C3,HEL-S-62p	187149	57	104	522	SEFPESWLWNVEDLKEPPK	R	N	0.997	90.5	25.9	18.7	90.5	0	7	5	0	2	2330.13	9525.74	239226000	765	783
Mudpit_Aged L3_4 Posterior NP IAF	Complement C3 OS=Homo sapiens GN=C3 PE=1 SV=2	P01024,V9HWA9	C3,HEL-S-62p	187149	57	104	522	SGIPIVTSPYQIHFTK	R	T	0.997	65.9	25.9	17.1	65.9	0	3	4	0	2	1787.97	8355.22	164691000	344	359
Mudpit_Aged L3_4 Posterior NP IAF	Complement C3 OS=Homo sapiens GN=C3 PE=1 SV=2	P01024,V9HWA9	C3,HEL-S-62p	187149	57	104	522	SNLDEDIIAEENIVSR	R	S	0.997	122	26.8	20.6	122	0	14	7	0	2	1816.89	8084.8	148768000	749	764
Mudpit_Aged L3_4 Posterior NP IAF	Complement C3 OS=Homo sapiens GN=C3 PE=1 SV=2	P01024,V9HWA9	C3,HEL-S-62p	187149	57	104	522	SSLSVPYVIVPLK	K	T	0.997	49.4	25	16.1	49.4	0	3	0	0	2	1401.84	8996.7	96033200	892	904
Mudpit_Aged L3_4 Posterior NP IAF	Complement C3 OS=Homo sapiens GN=C3 PE=1 SV=2	P01024,V9HWA9	C3,HEL-S-62p	187149	57	104	522	SYTVAIAGYALAQMGR	R	L	0.997	82.6	26.5	18.2	82.6	0	6	0	0	2	1687.85	7442.32	55834100	1186	1201
Mudpit_Aged L3_4 Posterior NP IAF	Complement C3 OS=Homo sapiens GN=C3 PE=1 SV=2	P01024,V9HWA9	C3,HEL-S-62p	187149	57	104	522	TELRPGETLNVNFLLR	R	M	0.997	81.6	25.1	18.1	81.6	0	3	5	0	2	1872.03	9314.52	231411000	463	478
Mudpit_Aged L3_4 Posterior NP IAF	Complement C3 OS=Homo sapiens GN=C3 PE=1 SV=2	P01024,V9HWA9	C3,HEL-S-62p	187149	57	104	522	TGLQEVEVK	K	A	0.997	83.2	27.9	26.8	74.6	0	8	0	0	2	1002.55	3209.43	458594000	905	913
Mudpit_Aged L3_4 Posterior NP IAF	Complement C3 OS=Homo sapiens GN=C3 PE=1 SV=2	P01024,V9HWA9	C3,HEL-S-62p	187149	57	104	522	TIYTPGSTVLYR	K	I	0.997	61.7	26.2	16.9	61.7	0	6	0	0	2	1370.73	6215.43	173065000	137	148
Mudpit_Aged L3_4 Posterior NP IAF	Complement C3 OS=Homo sapiens GN=C3 PE=1 SV=2	P01024,V9HWA9	C3,HEL-S-62p	187149	57	104	522	TMQALPYSTVGNSNNYLHLSVLR	R	T	0.997	106	27.5	19.6	106	0	1	6	0	2	2578.31	9093.67	109750000	440	462
Mudpit_Aged L3_4 Posterior NP IAF	Complement C3 OS=Homo sapiens GN=C3 PE=1 SV=2	P01024,V9HWA9	C3,HEL-S-62p	187149	57	104	522	TVMVNIENPEGIPVK	R	Q	0.997	75.2	26.6	17.7	75.2	0	13	2	0	2	1655.87	6413.69	433020000	162	176
Mudpit_Aged L3_4 Posterior NP IAF	Complement C3 OS=Homo sapiens GN=C3 PE=1 SV=2	P01024,V9HWA9	C3,HEL-S-62p	187149	57	104	522	VEGTAFVIFGIQDGEQR	K	I	0.997	111	27.8	19.9	111	0	8	3	0	2	1865.94	9242.47	150874000	265	281
Mudpit_Aged L3_4 Posterior NP IAF	Complement C3 OS=Homo sapiens GN=C3 PE=1 SV=2	P01024,V9HWA9	C3,HEL-S-62p	187149	57	104	522	VHQYFNVELIQPGAVK	K	V	0.997	79.4	25.8	18	79.4	0	6	2	0	2	1841.99	8364.73	104493000	1463	1478
Mudpit_Aged L3_4 Posterior NP IAF	Complement C3 OS=Homo sapiens GN=C3 PE=1 SV=2	P01024,V9HWA9	C3,HEL-S-62p	187149	57	104	522	VLLDGVQNPR	K	A	0.997	58.8	25	19.1	56.4	0	10	0	0	2	1110.63	4078.13	146687000	306	315
Mudpit_Aged L3_4 Posterior NP IAF	Complement C3 OS=Homo sapiens GN=C3 PE=1 SV=2	P01024,V9HWA9	C3,HEL-S-62p	187149	57	104	522	VPVAVQGEDTVQSLTQGDGVAK	R	L	0.997	130	26.5	21.1	130	0	20	13	0	2	2198.13	6573.08	799013000	387	408
Mudpit_Aged L3_4 Posterior NP IAF	Complement C3 OS=Homo sapiens GN=C3 PE=1 SV=2	P01024,V9HWA9	C3,HEL-S-62p	187149	57	104	522	VQLSNDFDEYIMAIEQTIK	K	S	0.997	119	26.2	20.4	119	0	6	1	0	2	2273.1	9576.28	38525000	1552	1570
Mudpit_Aged L3_4 Posterior NP IAF	Complement C3 OS=Homo sapiens GN=C3 PE=1 SV=2	P01024,V9HWA9	C3,HEL-S-62p	187149	57	104	522	VTIKPAPETEK	K	R	0.981	38.9	25	15.4	38.9	0	0	2	0	2	1212.68	2386.51	13420000	1365	1375
Mudpit_Aged L3_4 Posterior NP IAF	Complement C3 OS=Homo sapiens GN=C3 PE=1 SV=2	P01024,V9HWA9	C3,HEL-S-62p	187149	57	104	522	VVLVAVDK	R	G	0.99	60.7	25	16.8	60.7	0	4	0	0	2	842.535	3856.25	241304000	593	600
Mudpit_Aged L3_4 Posterior NP IAF	Complement C3 OS=Homo sapiens GN=C3 PE=1 SV=2	P01024,V9HWA9	C3,HEL-S-62p	187149	57	104	522	YRGDQDATMSILDISMMTGFAPDTDDLK	R	Q	0.997	76.4	25	17.8	44.6	0	0	18	0	2	3123.4	9796.11	9838230	1392	1419
Mudpit_Aged L3_4 Posterior NP IAF	Complement C3 OS=Homo sapiens GN=C3 PE=1 SV=2	P01024,V9HWA9	C3,HEL-S-62p	187149	57	104	522	YYTYLIMNK	R	G	0.997	40.9	25	15.6	40.9	0	5	0	0	2	1224.6	5794.38	72657100	489	497
Mudpit_Aged L3_4 Posterior NP IAF	Out at first protein homolog OS=Homo sapiens GN=OAF PE=2 SV=1	Q86UD1	OAF	30688.4	5	6	15	ALILGELEK	R	G	0.997	47.4	25	23	40.4	0	3	0	0	2	985.593	6475.51	45578400	84	92
Mudpit_Aged L3_4 Posterior NP IAF	Out at first protein homolog OS=Homo sapiens GN=OAF PE=2 SV=1	Q86UD1	OAF	30688.4	5	6	15	ASEQAELPR	K	C	0.997	56.5	25.4	16.5	56.5	0	1	0	0	2	1000.51	2159.08	3652620	195	203
Mudpit_Aged L3_4 Posterior NP IAF	Out at first protein homolog OS=Homo sapiens GN=OAF PE=2 SV=1	Q86UD1	OAF	30688.4	5	6	15	FWLEQGVDSSVFEALPK	R	A	0.997	63.7	27.3	17	63.7	0	2	0	0	2	1951.98	9228.1	25199200	178	194
Mudpit_Aged L3_4 Posterior NP IAF	Out at first protein homolog OS=Homo sapiens GN=OAF PE=2 SV=1	Q86UD1	OAF	30688.4	5	6	15	LPDGQVTEESLQADSDADSISLELR	R	K	0.997	94.3	25.7	18.9	94.3	0	2	6	0	2	2688.28	8332.21	23995200	38	62
Mudpit_Aged L3_4 Posterior NP IAF	Out at first protein homolog OS=Homo sapiens GN=OAF PE=2 SV=1	Q86UD1	OAF	30688.4	5	6	15	SYSFDFYVPQR	K	Q	0.997	48.6	25.3	16	48.6	0	1	0	0	2	1408.65	8254.61	16812000	251	261
Mudpit_Aged L3_4 Posterior NP IAF	Histone H2A OS=Homo sapiens GN=H2AFV PE=1 SV=1	C9J0D1,P0C0S5,Q71UI9	H2AFV,H2AFZ	13509.2	2	2	2	AGLQFPVGR	R	I	0.983	31.3	28.3	16.4	29.9	0	1	0	0	2	944.531	5921.09	4406610	24	32
Mudpit_Aged L3_4 Posterior NP IAF	Histone H2A OS=Homo sapiens GN=H2AFV PE=1 SV=1	C9J0D1,P0C0S5,Q71UI9	H2AFV,H2AFZ	13509.2	2	2	2	GDEELDSLIK	R	A	0.997	47	27.9	15.9	47	0	1	0	0	2	1118.56	6292.54	6914140	93	102
Mudpit_Aged L3_4 Posterior NP IAF	Cartilage intermediate layer protein 2 OS=Homo sapiens GN=CILP2 PE=1 SV=1	K7EPJ4	CILP2	126857	22	30	83	ADAGTAVTFQCR	K	E	0.966	28.4	25	14.8	28.4	0	1	0	0	2	1297.58	3661.4	3845290	1100	1111
Mudpit_Aged L3_4 Posterior NP IAF	Cartilage intermediate layer protein 2 OS=Homo sapiens GN=CILP2 PE=1 SV=1	K7EPJ4	CILP2	126857	22	30	83	AHGYGAHLELR	R	G	0.995	60.7	28.3	16.8	60.7	0	0	4	0	2	1223.63	6759.94	27135000	343	353
Mudpit_Aged L3_4 Posterior NP IAF	Cartilage intermediate layer protein 2 OS=Homo sapiens GN=CILP2 PE=1 SV=1	K7EPJ4	CILP2	126857	22	30	83	APGSAEQLQVGPVAVR	R	V	0.997	84.6	27.4	18.3	84.6	0	1	0	0	2	1578.86	5451.14	40830300	655	670
Mudpit_Aged L3_4 Posterior NP IAF	Cartilage intermediate layer protein 2 OS=Homo sapiens GN=CILP2 PE=1 SV=1	K7EPJ4	CILP2	126857	22	30	83	DLTSAASAPSDLR	R	F	0.988	31.6	25.4	15	31.6	0	1	0	0	2	1303.65	4616.13	10836100	620	632
Mudpit_Aged L3_4 Posterior NP IAF	Cartilage intermediate layer protein 2 OS=Homo sapiens GN=CILP2 PE=1 SV=1	K7EPJ4	CILP2	126857	22	30	83	DQPGTVATSDAHGTFR	R	V	0.997	63.9	25	17	63.9	0	2	3	0	2	1659.77	3183.94	44301700	238	253
Mudpit_Aged L3_4 Posterior NP IAF	Cartilage intermediate layer protein 2 OS=Homo sapiens GN=CILP2 PE=1 SV=1	K7EPJ4	CILP2	126857	22	30	83	EGTPASWTGDLLAWWPNPQEFR	R	A	0.997	76	25.4	17.7	76	0	1	1	0	2	2558.21	9475.79	13650500	922	943
Mudpit_Aged L3_4 Posterior NP IAF	Cartilage intermediate layer protein 2 OS=Homo sapiens GN=CILP2 PE=1 SV=1	K7EPJ4	CILP2	126857	22	30	83	FTPSEQVEGVVVTLVNLEPAPGFSANPR	K	A	0.997	86.5	25.8	18.4	86.5	0	1	4	0	2	2954.53	9428.66	69529600	755	782
Mudpit_Aged L3_4 Posterior NP IAF	Cartilage intermediate layer protein 2 OS=Homo sapiens GN=CILP2 PE=1 SV=1	K7EPJ4	CILP2	126857	22	30	83	FVDSDGELAPLR	R	T	0.997	89.4	28.1	18.6	89.4	0	7	0	0	2	1318.66	5807.31	100493000	633	644
Mudpit_Aged L3_4 Posterior NP IAF	Cartilage intermediate layer protein 2 OS=Homo sapiens GN=CILP2 PE=1 SV=1	K7EPJ4	CILP2	126857	22	30	83	HPPPVPAEDPAAFSMLAPLDPLGHNYGVYTVTDQSPR	R	L	0.992	57.1	25	16.6	57.1	0	0	0	3	2	3972.92	10495.2	24041300	1040	1076
Mudpit_Aged L3_4 Posterior NP IAF	Cartilage intermediate layer protein 2 OS=Homo sapiens GN=CILP2 PE=1 SV=1	K7EPJ4	CILP2	126857	22	30	83	ILLGQEPIGFTAYQGDFTIEVPPSTQR	R	L	0.997	92.3	25	18.8	92.3	0	1	0	0	2	2977.53	9200.27	9344700	499	525
Mudpit_Aged L3_4 Posterior NP IAF	Cartilage intermediate layer protein 2 OS=Homo sapiens GN=CILP2 PE=1 SV=1	K7EPJ4	CILP2	126857	22	30	83	IQGPQEYMVR	K	S	0.997	61.7	27.3	17.1	61.5	0	9	0	0	2	1220.61	3152.62	68259400	951	960
Mudpit_Aged L3_4 Posterior NP IAF	Cartilage intermediate layer protein 2 OS=Homo sapiens GN=CILP2 PE=1 SV=1	K7EPJ4	CILP2	126857	22	30	83	LEKPYLVK	K	H	0.988	33	25	15.1	33	0	1	0	0	2	989.603	3510.08	6553940	295	302
Mudpit_Aged L3_4 Posterior NP IAF	Cartilage intermediate layer protein 2 OS=Homo sapiens GN=CILP2 PE=1 SV=1	K7EPJ4	CILP2	126857	22	30	83	LFNLDVPER	R	R	0.997	43.7	28.4	21.7	37.7	0	2	0	0	2	1102.59	7025.85	11760200	732	740
Mudpit_Aged L3_4 Posterior NP IAF	Cartilage intermediate layer protein 2 OS=Homo sapiens GN=CILP2 PE=1 SV=1	K7EPJ4	CILP2	126857	22	30	83	LLESPATALGDIR	R	R	0.997	78.8	25.2	17.9	78.8	0	1	0	0	2	1355.75	7603.92	55836600	1124	1136
Mudpit_Aged L3_4 Posterior NP IAF	Cartilage intermediate layer protein 2 OS=Homo sapiens GN=CILP2 PE=1 SV=1	K7EPJ4	CILP2	126857	22	30	83	LVVTFVDPSGEFMDAVR	R	V	0.997	107	26.4	19.7	107	0	6	4	0	2	1881.94	9060.14	192124000	526	542
Mudpit_Aged L3_4 Posterior NP IAF	Cartilage intermediate layer protein 2 OS=Homo sapiens GN=CILP2 PE=1 SV=1	K7EPJ4	CILP2	126857	22	30	83	LWSLNPETGLWEEESGFR	K	R	0.997	99.6	25.1	19.2	99.6	0	3	0	0	2	2150.02	9266.64	25084800	687	704
Mudpit_Aged L3_4 Posterior NP IAF	Cartilage intermediate layer protein 2 OS=Homo sapiens GN=CILP2 PE=1 SV=1	K7EPJ4	CILP2	126857	22	30	83	TTDWALPSAVGER	R	V	0.997	54.9	26.7	16.4	54.9	0	8	0	0	2	1402.7	6392.02	175971000	106	118
Mudpit_Aged L3_4 Posterior NP IAF	Cartilage intermediate layer protein 2 OS=Homo sapiens GN=CILP2 PE=1 SV=1	K7EPJ4	CILP2	126857	22	30	83	TYGMFSVDLR	R	A	0.997	44	25	15.7	44	0	1	0	0	2	1204.57	6609.33	5212300	645	654
Mudpit_Aged L3_4 Posterior NP IAF	Cartilage intermediate layer protein 2 OS=Homo sapiens GN=CILP2 PE=1 SV=1	K7EPJ4	CILP2	126857	22	30	83	VAVNGLLR	R	D	0.99	52.1	25	20.8	47.5	0	2	0	0	2	841.525	4781.98	12050800	1027	1034
Mudpit_Aged L3_4 Posterior NP IAF	Cartilage intermediate layer protein 2 OS=Homo sapiens GN=CILP2 PE=1 SV=1	K7EPJ4	CILP2	126857	22	30	83	VFLVGNVEIR	R	E	0.997	51.6	25.8	16.2	51.6	0	3	0	0	2	1145.67	7721.84	46036700	719	728
Mudpit_Aged L3_4 Posterior NP IAF	Cartilage intermediate layer protein 2 OS=Homo sapiens GN=CILP2 PE=1 SV=1	K7EPJ4	CILP2	126857	22	30	83	VVAADSGEPLR	R	F	0.997	69.9	26	17.4	69.9	0	10	0	0	2	1113.59	2408.79	154852000	485	495
Mudpit_Aged L3_4 Posterior NP IAF	Cartilage intermediate layer protein 2 OS=Homo sapiens GN=CILP2 PE=1 SV=1	K7EPJ4	CILP2	126857	22	30	83	YEYNVVPFR	K	E	0.997	40.5	25.1	15.5	40.5	0	3	0	0	2	1186.59	6832.87	103933000	913	921
Mudpit_Aged L3_4 Posterior NP IAF	cDNA FLJ53075, highly similar to Kininogen-1 OS=Homo sapiens PE=2 SV=1	B4DPP8,D3DNU8	KNG1	47853.5	9	12	42	DIPTNSPELEETLTHTITK	R	L	0.997	84	27.2	18.2	84	0	4	6	0	2	2139.08	8488.84	522997000	270	288
Mudpit_Aged L3_4 Posterior NP IAF	cDNA FLJ53075, highly similar to Kininogen-1 OS=Homo sapiens PE=2 SV=1	B4DPP8,D3DNU8	KNG1	47853.5	9	12	42	IASFSQNCDIYPGK	R	D	0.997	65.6	25	17.1	65.6	0	6	0	0	2	1600.73	5668.87	35527500	241	254
Mudpit_Aged L3_4 Posterior NP IAF	cDNA FLJ53075, highly similar to Kininogen-1 OS=Homo sapiens PE=2 SV=1	B4DPP8,D3DNU8	KNG1	47853.5	9	12	42	IGEIKEETTSHLR	R	S	0.997	65.7	26.3	17.1	65.7	0	0	0	2	2	1512.8	4894.58	12934300	393	405
Mudpit_Aged L3_4 Posterior NP IAF	cDNA FLJ53075, highly similar to Kininogen-1 OS=Homo sapiens PE=2 SV=1	B4DPP8,D3DNU8	KNG1	47853.5	9	12	42	LGQSLDCNAEVYVVPWEK	K	K	0.997	87.9	25	18.5	87.9	0	5	0	0	2	2108	8792.22	32759100	345	362
Mudpit_Aged L3_4 Posterior NP IAF	cDNA FLJ53075, highly similar to Kininogen-1 OS=Homo sapiens PE=2 SV=1	B4DPP8,D3DNU8	KNG1	47853.5	9	12	42	QVVAGLNFR	R	I	0.997	56.6	26.8	16.5	56.6	0	4	0	0	2	1003.57	5685.76	81008800	188	196
Mudpit_Aged L3_4 Posterior NP IAF	cDNA FLJ53075, highly similar to Kininogen-1 OS=Homo sapiens PE=2 SV=1	B4DPP8,D3DNU8	KNG1	47853.5	9	12	42	SLWNGDTGECTDNAYIDIQLR	K	I	0.997	112	25	20.5	112	0	4	1	0	2	2442.09	8955.34	29822200	220	240
Mudpit_Aged L3_4 Posterior NP IAF	cDNA FLJ53075, highly similar to Kininogen-1 OS=Homo sapiens PE=2 SV=1	B4DPP8,D3DNU8	KNG1	47853.5	9	12	42	TVGSDTFYSFK	K	Y	0.997	86.9	26.1	18.4	86.9	0	3	0	0	2	1251.59	5752.93	49759600	65	75
Mudpit_Aged L3_4 Posterior NP IAF	cDNA FLJ53075, highly similar to Kininogen-1 OS=Homo sapiens PE=2 SV=1	B4DPP8,D3DNU8	KNG1	47853.5	9	12	42	YFIDFVAR	K	E	0.99	37.8	26.1	15.4	37.8	0	3	0	0	2	1030.54	7981.52	285095000	317	324
Mudpit_Aged L3_4 Posterior NP IAF	cDNA FLJ53075, highly similar to Kininogen-1 OS=Homo sapiens PE=2 SV=1	B4DPP8,D3DNU8	KNG1	47853.5	9	12	42	YNSQNQSNNQFVLYR	K	I	0.997	84.8	25.1	18.3	84.8	0	3	1	0	2	1874.88	5404.18	34465600	44	58
Mudpit_Aged L3_4 Posterior NP IAF	Haptoglobin (Fragment) OS=Homo sapiens GN=HP PE=1 SV=1	H3BS21	HP	24796.4	2	3	16	LRTEGDGVYTLNNEK	K	Q	0.997	63.5	26.4	34.5	46	0	6	2	0	2	1708.85	4156.29	121619000	58	72
Mudpit_Aged L3_4 Posterior NP IAF	Haptoglobin (Fragment) OS=Homo sapiens GN=HP PE=1 SV=1	H3BS21	HP	24796.4	2	3	16	TEGDGVYTLNNEK	R	Q	0.997	87.5	25	18.5	87.5	0	8	0	0	2	1439.66	3357.05	87932200	60	72
Mudpit_Aged L3_4 Posterior NP IAF	Alanyl (Membrane) aminopeptidase (Aminopeptidase N, aminopeptidase M, microsomal aminopeptidase, CD13, p150), isoform CRA_a OS=Homo sapiens GN=ANPEP PE=4 SV=1	A0A024RC61,P15144,Q59E93	ANPEP	109542	3	3	4	ENSLLFDPLSSSSSNK	R	E	0.995	36.3	25.9	15.3	36.3	0	1	0	0	2	1724.83	7576.44	6139180	364	379
Mudpit_Aged L3_4 Posterior NP IAF	Alanyl (Membrane) aminopeptidase (Aminopeptidase N, aminopeptidase M, microsomal aminopeptidase, CD13, p150), isoform CRA_a OS=Homo sapiens GN=ANPEP PE=4 SV=1	A0A024RC61,P15144,Q59E93	ANPEP	109542	3	3	4	VVATTQMQAADAR	K	K	0.997	100	28.1	19.3	100	0	1	0	0	2	1361.68	2367.56	3842410	206	218
Mudpit_Aged L3_4 Posterior NP IAF	Alanyl (Membrane) aminopeptidase (Aminopeptidase N, aminopeptidase M, microsomal aminopeptidase, CD13, p150), isoform CRA_a OS=Homo sapiens GN=ANPEP PE=4 SV=1	A0A024RC61,P15144,Q59E93	ANPEP	109542	3	3	4	YLSYTLNPDLIR	R	K	0.997	42.5	25.6	15.7	42.5	0	2	0	0	2	1467.78	8383.17	8260210	844	855
Mudpit_Aged L3_4 Posterior NP IAF	Complement C1r subcomponent-like protein OS=Homo sapiens GN=C1RL PE=1 SV=2	Q9NZP8	C1RL	53497.5	2	2	4	GSEAINAPGDNPAK	R	V	0.997	48.7	26.7	16	48.7	0	1	0	0	2	1340.64	1969.97	5120740	177	190
Mudpit_Aged L3_4 Posterior NP IAF	Complement C1r subcomponent-like protein OS=Homo sapiens GN=C1RL PE=1 SV=2	Q9NZP8	C1RL	53497.5	2	2	4	VLSYVDWIK	K	G	0.997	47.3	25	16	47.3	0	3	0	0	2	1122.62	8499.92	19229600	472	480
Mudpit_Aged L3_4 Posterior NP IAF	Metalloproteinase inhibitor 3 OS=Homo sapiens GN=TIMP3 PE=1 SV=2	P35625	TIMP3	24145.5	3	4	12	EGPFGTLVYTIK	K	Q	0.997	72.2	25.8	23.3	66.5	0	6	0	0	2	1324.71	8625.58	106093000	54	65
Mudpit_Aged L3_4 Posterior NP IAF	Metalloproteinase inhibitor 3 OS=Homo sapiens GN=TIMP3 PE=1 SV=2	P35625	TIMP3	24145.5	3	4	12	MYTGLCNFVER	K	W	0.997	41.3	25	15.6	41.3	0	4	0	0	2	1406.61	6329.19	29813900	113	123
Mudpit_Aged L3_4 Posterior NP IAF	Metalloproteinase inhibitor 3 OS=Homo sapiens GN=TIMP3 PE=1 SV=2	P35625	TIMP3	24145.5	3	4	12	WDQLTLSQR	R	K	0.997	48.8	34.1	16.1	48.8	0	2	0	0	2	1146.59	5489.58	25136700	124	132
Mudpit_Aged L3_4 Posterior NP IAF	Histidine-rich glycoprotein OS=Homo sapiens GN=HRG PE=1 SV=1	P04196	HRG	59576.6	8	11	37	ADLFYDVEALDLESPK	R	N	0.997	107	26.6	19.7	107	0	5	1	0	2	1824.89	9181.16	193452000	220	235
Mudpit_Aged L3_4 Posterior NP IAF	Histidine-rich glycoprotein OS=Homo sapiens GN=HRG PE=1 SV=1	P04196	HRG	59576.6	8	11	37	DGYLFQLLR	R	I	0.997	43.7	26.5	15.7	43.7	0	3	0	0	2	1124.61	9184.12	150165000	44	52
Mudpit_Aged L3_4 Posterior NP IAF	Histidine-rich glycoprotein OS=Homo sapiens GN=HRG PE=1 SV=1	P04196	HRG	59576.6	8	11	37	DSPVLIDFFEDTER	K	Y	0.997	81	25.5	18.1	81	0	6	1	0	2	1682.79	9288.2	210701000	140	153
Mudpit_Aged L3_4 Posterior NP IAF	Histidine-rich glycoprotein OS=Homo sapiens GN=HRG PE=1 SV=1	P04196	HRG	59576.6	8	11	37	EENDDFASFR	K	V	0.997	42.2	25	15.6	42.2	0	1	0	0	2	1229.51	4869.37	22293200	167	176
Mudpit_Aged L3_4 Posterior NP IAF	Histidine-rich glycoprotein OS=Homo sapiens GN=HRG PE=1 SV=1	P04196	HRG	59576.6	8	11	37	GGEGTGYFVDFSVR	R	N	0.997	76.8	25	17.8	76.8	0	5	0	0	2	1490.69	7994.31	102698000	188	201
Mudpit_Aged L3_4 Posterior NP IAF	Histidine-rich glycoprotein OS=Homo sapiens GN=HRG PE=1 SV=1	P04196	HRG	59576.6	8	11	37	SGFPQVSMFFTHTFPK	K	-	0.945	33.5	26	15.1	33.5	0	0	1	0	2	1857.9	9339.29	9238000	510	525
Mudpit_Aged L3_4 Posterior NP IAF	Histidine-rich glycoprotein OS=Homo sapiens GN=HRG PE=1 SV=1	P04196	HRG	59576.6	8	11	37	YKEENDDFASFR	K	V	0.997	76.8	25	17.8	76.8	0	9	2	0	2	1520.67	6032.92	129112000	165	176
Mudpit_Aged L3_4 Posterior NP IAF	Histidine-rich glycoprotein OS=Homo sapiens GN=HRG PE=1 SV=1	P04196	HRG	59576.6	8	11	37	YWNDCEPPDSR	K	R	0.996	38.1	25	15.4	38.1	0	3	0	0	2	1439.55	3764.21	10968200	85	95
Mudpit_Aged L3_4 Posterior NP IAF	Mannosyl-oligosaccharide 1,2-alpha-mannosidase IA OS=Homo sapiens GN=MAN1A1 PE=1 SV=3	P33908	MAN1A1	72971.7	2	2	3	FDGGVEAIATR	R	Q	0.997	64.1	26.3	20.7	60.4	0	2	0	0	2	1135.57	4783.45	21412000	526	536
Mudpit_Aged L3_4 Posterior NP IAF	Mannosyl-oligosaccharide 1,2-alpha-mannosidase IA OS=Homo sapiens GN=MAN1A1 PE=1 SV=3	P33908	MAN1A1	72971.7	2	2	3	WAWEAVEALENHCR	K	V	0.972	34.8	25	15.2	34.8	0	0	1	0	2	1771.79	8311.67	6305920	567	580
Mudpit_Aged L3_4 Posterior NP IAF	Testicular secretory protein Li 24 OS=Homo sapiens PE=2 SV=1	A0A140VK24_HUMAN,P04180	LCAT	49579	3	3	4	LEPGQQEEYYR	R	K	0.997	64.4	25	17.1	64.3	0	1	0	0	2	1411.65	3165.18	8394810	172	182
Mudpit_Aged L3_4 Posterior NP IAF	Testicular secretory protein Li 24 OS=Homo sapiens PE=2 SV=1	A0A140VK24_HUMAN,P04180	LCAT	49579	3	3	4	SSGLVSNAPGVQIR	R	V	0.997	61	26.2	16.8	61	0	2	0	0	2	1384.75	4996.04	13214700	110	123
Mudpit_Aged L3_4 Posterior NP IAF	Testicular secretory protein Li 24 OS=Homo sapiens PE=2 SV=1	A0A140VK24_HUMAN,P04180	LCAT	49579	3	3	4	TYSVEYLDSSK	K	L	0.987	35.1	25	15.2	35.1	0	1	0	0	2	1291.61	4690.33	8312860	130	140
Mudpit_Aged L3_4 Posterior NP IAF	cDNA FLJ78207, highly similar to Human complement protein component C7 mRNA OS=Homo sapiens PE=2 SV=1	A8K2T4,P10643	C7	93516.6	11	16	47	DGFVQDEGTMFPVGK	K	N	0.997	78.1	25	17.9	78.1	0	7	0	0	2	1626.75	7538.21	74582400	579	593
Mudpit_Aged L3_4 Posterior NP IAF	cDNA FLJ78207, highly similar to Human complement protein component C7 mRNA OS=Homo sapiens PE=2 SV=1	A8K2T4,P10643	C7	93516.6	11	16	47	ELSHLPSLYDYSAYR	K	R	0.997	94.2	26.3	18.9	94.2	0	3	6	0	2	1813.88	7687.3	130188000	279	293
Mudpit_Aged L3_4 Posterior NP IAF	cDNA FLJ78207, highly similar to Human complement protein component C7 mRNA OS=Homo sapiens PE=2 SV=1	A8K2T4,P10643	C7	93516.6	11	16	47	ENPLTQAVPK	K	C	0.974	26.8	25.4	14.7	26.8	0	1	0	0	2	1096.6	4260.22	7483540	692	701
Mudpit_Aged L3_4 Posterior NP IAF	cDNA FLJ78207, highly similar to Human complement protein component C7 mRNA OS=Homo sapiens PE=2 SV=1	A8K2T4,P10643	C7	93516.6	11	16	47	GGGAGFISGLSYLELDNPAGNK	R	R	0.997	97.3	26.7	19.1	97.3	0	5	2	0	2	2137.06	9138.66	86128700	379	400
Mudpit_Aged L3_4 Posterior NP IAF	cDNA FLJ78207, highly similar to Human complement protein component C7 mRNA OS=Homo sapiens PE=2 SV=1	A8K2T4,P10643	C7	93516.6	11	16	47	LIDQYGTHYLQSGSLGGEYR	R	V	0.997	124	25.2	20.8	124	0	5	4	0	2	2257.09	8209.88	179969000	295	314
Mudpit_Aged L3_4 Posterior NP IAF	cDNA FLJ78207, highly similar to Human complement protein component C7 mRNA OS=Homo sapiens PE=2 SV=1	A8K2T4,P10643	C7	93516.6	11	16	47	LSGNVLSYTFQVK	R	I	0.997	80	25.8	18	80	0	2	0	0	2	1455.78	8105.71	9744560	179	191
Mudpit_Aged L3_4 Posterior NP IAF	cDNA FLJ78207, highly similar to Human complement protein component C7 mRNA OS=Homo sapiens PE=2 SV=1	A8K2T4,P10643	C7	93516.6	11	16	47	LTPLYELVK	K	E	0.997	43.8	25	15.7	43.8	0	5	0	0	2	1075.64	7966.54	97116000	421	429
Mudpit_Aged L3_4 Posterior NP IAF	cDNA FLJ78207, highly similar to Human complement protein component C7 mRNA OS=Homo sapiens PE=2 SV=1	A8K2T4,P10643	C7	93516.6	11	16	47	QNDFNSVEEK	K	K	0.997	64.2	25	17	64.2	0	1	0	0	2	1209.54	2217.3	7600370	326	335
Mudpit_Aged L3_4 Posterior NP IAF	cDNA FLJ78207, highly similar to Human complement protein component C7 mRNA OS=Homo sapiens PE=2 SV=1	A8K2T4,P10643	C7	93516.6	11	16	47	SSGWHFVVK	K	F	0.997	42.8	26.1	23.5	35	0	1	0	0	2	1046.54	8030.32	2618920	339	347
Mudpit_Aged L3_4 Posterior NP IAF	cDNA FLJ78207, highly similar to Human complement protein component C7 mRNA OS=Homo sapiens PE=2 SV=1	A8K2T4,P10643	C7	93516.6	11	16	47	VLFYVDSEK	R	L	0.997	48.5	25	16	48.5	0	2	0	0	2	1099.57	5542.94	46000200	315	323
Mudpit_Aged L3_4 Posterior NP IAF	cDNA FLJ78207, highly similar to Human complement protein component C7 mRNA OS=Homo sapiens PE=2 SV=1	A8K2T4,P10643	C7	93516.6	11	16	47	YSAWAESVTNLPQVIK	R	Q	0.997	62.4	27.3	16.9	62.4	0	2	1	0	2	1805.94	8931.94	77298600	403	418
Mudpit_Aged L3_4 Posterior NP IAF	Glyceraldehyde-3-phosphate dehydrogenase OS=Homo sapiens GN=GAPDH PE=1 SV=3	P04406,V9HVZ4	GAPDH,HEL-S-162eP	36053.4	5	5	7	GALQNIIPASTGAAK	R	A	0.97	27.5	25	14.7	27.5	0	1	0	0	2	1411.79	6241.33	3803150	201	215
Mudpit_Aged L3_4 Posterior NP IAF	Glyceraldehyde-3-phosphate dehydrogenase OS=Homo sapiens GN=GAPDH PE=1 SV=3	P04406,V9HVZ4	GAPDH,HEL-S-162eP	36053.4	5	5	7	LISWYDNEFGYSNR	K	V	0.997	71.2	25	17.5	71.2	0	3	0	0	2	1763.8	8273.35	10781300	310	323
Mudpit_Aged L3_4 Posterior NP IAF	Glyceraldehyde-3-phosphate dehydrogenase OS=Homo sapiens GN=GAPDH PE=1 SV=3	P04406,V9HVZ4	GAPDH,HEL-S-162eP	36053.4	5	5	7	LVINGNPITIFQER	K	D	0.997	73	25.3	17.6	73	0	1	0	0	2	1613.9	8667.87	13129100	67	80
Mudpit_Aged L3_4 Posterior NP IAF	Glyceraldehyde-3-phosphate dehydrogenase OS=Homo sapiens GN=GAPDH PE=1 SV=3	P04406,V9HVZ4	GAPDH,HEL-S-162eP	36053.4	5	5	7	VIISAPSADAPMFVMGVNHEK	R	Y	0.996	57.8	26.3	16.6	57.8	0	0	1	0	2	2213.11	9054.01	10134400	119	139
Mudpit_Aged L3_4 Posterior NP IAF	Glyceraldehyde-3-phosphate dehydrogenase OS=Homo sapiens GN=GAPDH PE=1 SV=3	P04406,V9HVZ4	GAPDH,HEL-S-162eP	36053.4	5	5	7	VVDLMAHMASK	R	-	0.975	43.9	26.7	15.7	43.9	0	0	1	0	2	1201.61	6497.83	3257960	324	334
Mudpit_Aged L3_4 Posterior NP IAF	Proteoglycan 4, isoform CRA_a OS=Homo sapiens GN=PRG4 PE=4 SV=1	A0A024R930,Q92954	PRG4	151080	14	27	157	AIGPSQTHTIR	R	I	0.996	67.7	26.2	17.2	67.7	0	1	7	0	2	1180.64	3469.59	40765500	1307	1317
Mudpit_Aged L3_4 Posterior NP IAF	Proteoglycan 4, isoform CRA_a OS=Homo sapiens GN=PRG4 PE=4 SV=1	A0A024R930,Q92954	PRG4	151080	14	27	157	DAGYPKPIFK	K	G	0.997	49.7	26.9	16.1	49.7	0	8	4	0	2	1135.61	5452.23	440830000	1225	1234
Mudpit_Aged L3_4 Posterior NP IAF	Proteoglycan 4, isoform CRA_a OS=Homo sapiens GN=PRG4 PE=4 SV=1	A0A024R930,Q92954	PRG4	151080	14	27	157	DQYYNIDVPSR	K	T	0.997	63	25	16.9	63	0	20	1	0	2	1369.64	5734.99	1395260000	1373	1383
Mudpit_Aged L3_4 Posterior NP IAF	Proteoglycan 4, isoform CRA_a OS=Homo sapiens GN=PRG4 PE=4 SV=1	A0A024R930,Q92954	PRG4	151080	14	27	157	GFGGLTGQIVAALSTAK	K	Y	0.997	89.1	25	18.6	89.1	0	2	2	0	2	1590.89	9111.68	111035000	1235	1251
Mudpit_Aged L3_4 Posterior NP IAF	Proteoglycan 4, isoform CRA_a OS=Homo sapiens GN=PRG4 PE=4 SV=1	A0A024R930,Q92954	PRG4	151080	14	27	157	GGSIQQYIYK	R	Q	0.997	62.8	26	21.7	58	0	7	0	0	2	1156.6	4991.02	154121000	1265	1274
Mudpit_Aged L3_4 Posterior NP IAF	Proteoglycan 4, isoform CRA_a OS=Homo sapiens GN=PRG4 PE=4 SV=1	A0A024R930,Q92954	PRG4	151080	14	27	157	GHYFWMLSPFSPPSPAR	R	R	0.997	69.1	25.3	17.3	69.1	0	2	4	0	2	1992.94	9248.09	164664000	1167	1183
Mudpit_Aged L3_4 Posterior NP IAF	Proteoglycan 4, isoform CRA_a OS=Homo sapiens GN=PRG4 PE=4 SV=1	A0A024R930,Q92954	PRG4	151080	14	27	157	GLPNVVTSAISLPNIR	R	K	0.997	82.5	25	18.2	82.5	0	3	2	0	2	1650.95	8953.49	347158000	1345	1360
Mudpit_Aged L3_4 Posterior NP IAF	Proteoglycan 4, isoform CRA_a OS=Homo sapiens GN=PRG4 PE=4 SV=1	A0A024R930,Q92954	PRG4	151080	14	27	157	GVLHNEVK	K	V	0.99	34.8	26.2	15.2	34.8	0	1	0	0	2	895.5	2363.8	4439830	1331	1338
Mudpit_Aged L3_4 Posterior NP IAF	Proteoglycan 4, isoform CRA_a OS=Homo sapiens GN=PRG4 PE=4 SV=1	A0A024R930,Q92954	PRG4	151080	14	27	157	ITEVWGIPSPIDTVFTR	R	C	0.997	72.3	25.4	19.6	70.2	0	12	4	0	2	1931.03	9306.64	2093560000	1185	1201
Mudpit_Aged L3_4 Posterior NP IAF	Proteoglycan 4, isoform CRA_a OS=Homo sapiens GN=PRG4 PE=4 SV=1	A0A024R930,Q92954	PRG4	151080	14	27	157	KPDGYDYYAFSK	R	D	0.997	81.4	25	18.1	81.4	0	33	27	0	2	1453.66	5915.85	853952000	1361	1372
Mudpit_Aged L3_4 Posterior NP IAF	Proteoglycan 4, isoform CRA_a OS=Homo sapiens GN=PRG4 PE=4 SV=1	A0A024R930,Q92954	PRG4	151080	14	27	157	NWPESVYFFK	K	R	0.968	26.1	25.6	14.6	26.1	0	1	0	0	2	1316.63	9033.28	161398000	1254	1263
Mudpit_Aged L3_4 Posterior NP IAF	Proteoglycan 4, isoform CRA_a OS=Homo sapiens GN=PRG4 PE=4 SV=1	A0A024R930,Q92954	PRG4	151080	14	27	157	RPALNYPVYGETTQVR	R	R	0.997	73	26.8	17.6	73	0	1	1	0	2	1863.97	6713.02	16572600	1285	1300
Mudpit_Aged L3_4 Posterior NP IAF	Proteoglycan 4, isoform CRA_a OS=Homo sapiens GN=PRG4 PE=4 SV=1	A0A024R930,Q92954	PRG4	151080	14	27	157	VIESEEITEEHSVSENQESSSSSSSSSSSSTIR	K	K	0.997	82.7	25	18.2	82.7	0	0	2	2	2	3502.54	4913.97	12995200	148	180
Mudpit_Aged L3_4 Posterior NP IAF	Proteoglycan 4, isoform CRA_a OS=Homo sapiens GN=PRG4 PE=4 SV=1	A0A024R930,Q92954	PRG4	151080	14	27	157	VPNQGIIINPMLSDETNICNGKPVDGLTTLR	R	N	0.995	68.1	25.2	17.3	68.1	0	0	9	1	2	3380.72	9100.74	126667000	1128	1158
Mudpit_Aged L3_4 Posterior NP IAF	Protein disulfide-isomerase A6 OS=Homo sapiens GN=PDIA6 PE=1 SV=1	Q15084	PDIA6	48122.3	3	3	3	GESPVDYDGGR	K	T	0.997	69.6	25	17.3	69.6	0	1	0	0	2	1151.5	2368.32	4403430	246	256
Mudpit_Aged L3_4 Posterior NP IAF	Protein disulfide-isomerase A6 OS=Homo sapiens GN=PDIA6 PE=1 SV=1	Q15084	PDIA6	48122.3	3	3	3	LAAVDATVNQVLASR	K	Y	0.997	61.1	26.4	16.8	61.1	0	1	0	0	2	1527.85	7523.15	5276450	217	231
Mudpit_Aged L3_4 Posterior NP IAF	Protein disulfide-isomerase A6 OS=Homo sapiens GN=PDIA6 PE=1 SV=1	Q15084	PDIA6	48122.3	3	3	3	NLEPEWAAAASEVK	K	E	0.991	31.8	25	15	31.8	0	1	0	0	2	1514.75	6761.67	4371090	195	208
Mudpit_Aged L3_4 Posterior NP IAF	Protein disulfide-isomerase OS=Homo sapiens PE=2 SV=1	B3KQT9,P30101,V9HVY3	HEL-S-269,PDIA3	56784.6	2	3	3	FVMQEEFSR	K	D	0.997	46.4	25	15.9	46.4	0	1	0	0	2	1188.54	3214.78	4784200	336	344
Mudpit_Aged L3_4 Posterior NP IAF	Protein disulfide-isomerase OS=Homo sapiens PE=2 SV=1	B3KQT9,P30101,V9HVY3	HEL-S-269,PDIA3	56784.6	2	3	3	MDATANDVPSPYEVR	K	G	0.997	36.3	25	15.3	36.3	0	2	0	0	2	1664.76	5030.54	6466600	434	448
Mudpit_Aged L3_4 Posterior NP IAF	Fibrinogen beta chain OS=Homo sapiens GN=FGB PE=1 SV=2	P02675,V9HVY1	FGB,HEL-S-78p	55928.6	18	42	297	AHYGGFTVQNEANK	K	Y	0.997	83.8	25.1	18.2	83.8	0	5	5	0	2	1535.72	4239.53	308522000	354	367
Mudpit_Aged L3_4 Posterior NP IAF	Fibrinogen beta chain OS=Homo sapiens GN=FGB PE=1 SV=2	P02675,V9HVY1	FGB,HEL-S-78p	55928.6	18	42	297	DNDGWLTSDPR	R	K	0.997	76.3	25	18.8	75.3	0	10	0	0	2	1275.56	5340.75	148213000	411	421
Mudpit_Aged L3_4 Posterior NP IAF	Fibrinogen beta chain OS=Homo sapiens GN=FGB PE=1 SV=2	P02675,V9HVY1	FGB,HEL-S-78p	55928.6	18	42	297	DNENVVNEYSSELEK	K	H	0.997	106	25	19.6	106	0	14	2	0	2	1768.79	6258.74	718919000	164	178
Mudpit_Aged L3_4 Posterior NP IAF	Fibrinogen beta chain OS=Homo sapiens GN=FGB PE=1 SV=2	P02675,V9HVY1	FGB,HEL-S-78p	55928.6	18	42	297	EDGGGWWYNR	K	C	0.997	55.9	25	16.5	55.9	0	12	0	0	2	1239.52	5965.93	185921000	427	436
Mudpit_Aged L3_4 Posterior NP IAF	Fibrinogen beta chain OS=Homo sapiens GN=FGB PE=1 SV=2	P02675,V9HVY1	FGB,HEL-S-78p	55928.6	18	42	297	EEAPSLRPAPPPISGGGYR	R	A	0.997	52.8	26.4	16.3	52.8	0	2	0	0	2	1951	5424.35	11968800	54	72
Mudpit_Aged L3_4 Posterior NP IAF	Fibrinogen beta chain OS=Homo sapiens GN=FGB PE=1 SV=2	P02675,V9HVY1	FGB,HEL-S-78p	55928.6	18	42	297	GGETSEMYLIQPDSSVKPYR	K	V	0.997	119	26	20.4	119	0	11	23	0	2	2257.08	6655.38	982118000	248	267
Mudpit_Aged L3_4 Posterior NP IAF	Fibrinogen beta chain OS=Homo sapiens GN=FGB PE=1 SV=2	P02675,V9HVY1	FGB,HEL-S-78p	55928.6	18	42	297	HGTDDGVVWMNWK	K	G	0.997	84.4	25	22.2	80.4	0	22	10	0	2	1544.7	8925.55	524122000	459	471
Mudpit_Aged L3_4 Posterior NP IAF	Fibrinogen beta chain OS=Homo sapiens GN=FGB PE=1 SV=2	P02675,V9HVY1	FGB,HEL-S-78p	55928.6	18	42	297	HQLYIDETVNSNIPTNLR	K	V	0.997	115	27.8	20.2	115	0	15	19	0	2	2127.08	8367.12	1870570000	179	196
Mudpit_Aged L3_4 Posterior NP IAF	Fibrinogen beta chain OS=Homo sapiens GN=FGB PE=1 SV=2	P02675,V9HVY1	FGB,HEL-S-78p	55928.6	18	42	297	KGGETSEMYLIQPDSSVKPYR	R	V	0.994	54.6	26.1	16.4	54.6	0	0	2	1	2	2401.17	5876.08	62230400	247	267
Mudpit_Aged L3_4 Posterior NP IAF	Fibrinogen beta chain OS=Homo sapiens GN=FGB PE=1 SV=2	P02675,V9HVY1	FGB,HEL-S-78p	55928.6	18	42	297	MGPTELLIEMEDWK	R	G	0.997	143	25	21.9	143	0	29	14	0	2	1707.8	8796.79	1623470000	335	348
Mudpit_Aged L3_4 Posterior NP IAF	Fibrinogen beta chain OS=Homo sapiens GN=FGB PE=1 SV=2	P02675,V9HVY1	FGB,HEL-S-78p	55928.6	18	42	297	NSVDELNNNVEAVSQTSSSSFQYMYLLK	R	D	0.997	138	25	21.6	138	0	0	9	0	2	3167.48	8988.34	100215000	125	152
Mudpit_Aged L3_4 Posterior NP IAF	Fibrinogen beta chain OS=Homo sapiens GN=FGB PE=1 SV=2	P02675,V9HVY1	FGB,HEL-S-78p	55928.6	18	42	297	NYCGLPGEYWLGNDK	K	I	0.997	43.2	25	15.7	43.2	0	6	0	0	2	1786.77	8408.32	49280100	314	328
Mudpit_Aged L3_4 Posterior NP IAF	Fibrinogen beta chain OS=Homo sapiens GN=FGB PE=1 SV=2	P02675,V9HVY1	FGB,HEL-S-78p	55928.6	18	42	297	QDGSVDFGR	R	K	0.997	72.6	25	19.9	70.2	0	4	0	0	2	980.443	2516.58	24610800	286	294
Mudpit_Aged L3_4 Posterior NP IAF	Fibrinogen beta chain OS=Homo sapiens GN=FGB PE=1 SV=2	P02675,V9HVY1	FGB,HEL-S-78p	55928.6	18	42	297	QGFGNVATNTDGK	K	N	0.997	92.6	25.3	18.8	92.6	0	9	0	0	2	1308.62	2517.89	1212430000	301	313
Mudpit_Aged L3_4 Posterior NP IAF	Fibrinogen beta chain OS=Homo sapiens GN=FGB PE=1 SV=2	P02675,V9HVY1	FGB,HEL-S-78p	55928.6	18	42	297	QVKDNENVVNEYSSELEK	K	H	0.946	46.3	25.9	15.9	46.3	0	0	2	0	2	2124.01	6997.9	5374190	161	178
Mudpit_Aged L3_4 Posterior NP IAF	Fibrinogen beta chain OS=Homo sapiens GN=FGB PE=1 SV=2	P02675,V9HVY1	FGB,HEL-S-78p	55928.6	18	42	297	TMTIHNGMFFSTYDR	R	D	0.997	64	25	17	64	0	2	6	0	2	1820.81	7948.16	68790000	396	410
Mudpit_Aged L3_4 Posterior NP IAF	Fibrinogen beta chain OS=Homo sapiens GN=FGB PE=1 SV=2	P02675,V9HVY1	FGB,HEL-S-78p	55928.6	18	42	297	VYCDMNTENGGWTVIQNR	R	Q	0.997	97.1	25	19.1	97.1	0	21	6	0	2	2157.93	6520.24	205755000	268	285
Mudpit_Aged L3_4 Posterior NP IAF	Fibrinogen beta chain OS=Homo sapiens GN=FGB PE=1 SV=2	P02675,V9HVY1	FGB,HEL-S-78p	55928.6	18	42	297	YYWGGQYTWDMAK	R	H	0.997	65.2	25	17.1	65.2	0	36	0	0	2	1668.72	7958.21	747437000	446	458
Mudpit_Aged L3_4 Posterior NP IAF	14-3-3 protein epsilon OS=Homo sapiens GN=YWHAE PE=1 SV=1	P62258,V9HW98	HEL2,YWHAE	29175	5	5	6	AAFDDAIAELDTLSEESYK	K	D	0.997	104	25	19.5	104	0	1	0	0	2	2087.97	9249.69	3733060	197	215
Mudpit_Aged L3_4 Posterior NP IAF	14-3-3 protein epsilon OS=Homo sapiens GN=YWHAE PE=1 SV=1	P62258,V9HW98	HEL2,YWHAE	29175	5	5	6	DSTLIMQLLR	K	D	0.997	44.7	26.6	17.5	42.9	0	1	0	0	2	1189.66	9204.26	22057700	216	225
Mudpit_Aged L3_4 Posterior NP IAF	14-3-3 protein epsilon OS=Homo sapiens GN=YWHAE PE=1 SV=1	P62258,V9HW98	HEL2,YWHAE	29175	5	5	6	EAAENSLVAYK	K	A	0.997	55.4	27.9	16.5	55.4	0	1	0	0	2	1194.6	3625.1	4111450	143	153
Mudpit_Aged L3_4 Posterior NP IAF	14-3-3 protein epsilon OS=Homo sapiens GN=YWHAE PE=1 SV=1	P62258,V9HW98	HEL2,YWHAE	29175	5	5	6	NLLSVAYK	R	N	0.99	41.8	25.6	36.2	21.2	0	2	0	0	2	907.525	5370.07	13681700	43	50
Mudpit_Aged L3_4 Posterior NP IAF	14-3-3 protein epsilon OS=Homo sapiens GN=YWHAE PE=1 SV=1	P62258,V9HW98	HEL2,YWHAE	29175	5	5	6	VAGMDVELTVEER	K	N	0.997	38.1	26.3	15.4	38.1	0	1	0	0	2	1463.7	5045.08	1852760	30	42
Mudpit_Aged L3_4 Posterior NP IAF	Lipopolysaccharide-binding protein OS=Homo sapiens GN=LBP PE=1 SV=3	P18428,Q8TCF0	LBP	53386	7	11	45	ATAQMLEVMFK	R	G	0.997	56.8	25.5	16.5	45.6	0	7	0	0	2	1284.63	8713.35	31876700	238	248
Mudpit_Aged L3_4 Posterior NP IAF	Lipopolysaccharide-binding protein OS=Homo sapiens GN=LBP PE=1 SV=3	P18428,Q8TCF0	LBP	53386	7	11	45	GLQYAAQEGLLALQSELLR	K	I	0.997	145	25	22.1	145	0	4	6	0	2	2073.13	9473.57	110150000	38	56
Mudpit_Aged L3_4 Posterior NP IAF	Lipopolysaccharide-binding protein OS=Homo sapiens GN=LBP PE=1 SV=3	P18428,Q8TCF0	LBP	53386	7	11	45	ITLPDFTGDLR	R	I	0.997	59.3	26.1	16.7	59.3	0	10	0	0	2	1247.66	8382.04	72156800	57	67
Mudpit_Aged L3_4 Posterior NP IAF	Lipopolysaccharide-binding protein OS=Homo sapiens GN=LBP PE=1 SV=3	P18428,Q8TCF0	LBP	53386	7	11	45	LAEGFPLPLLK	K	R	0.997	39	25	15.4	39	0	2	0	0	2	1197.72	9088.08	47891500	444	454
Mudpit_Aged L3_4 Posterior NP IAF	Lipopolysaccharide-binding protein OS=Homo sapiens GN=LBP PE=1 SV=3	P18428,Q8TCF0	LBP	53386	7	11	45	LQGSFDVSVK	K	G	0.997	50.4	26.5	19.2	47.4	0	3	0	0	2	1079.57	4793.91	25523300	125	134
Mudpit_Aged L3_4 Posterior NP IAF	Lipopolysaccharide-binding protein OS=Homo sapiens GN=LBP PE=1 SV=3	P18428,Q8TCF0	LBP	53386	7	11	45	SPVTLLAAVMSLPEEHNK	R	M	0.992	50.3	26.9	16.1	50.3	0	0	4	0	2	1936.02	9326.91	22799200	258	275
Mudpit_Aged L3_4 Posterior NP IAF	Lipopolysaccharide-binding protein OS=Homo sapiens GN=LBP PE=1 SV=3	P18428,Q8TCF0	LBP	53386	7	11	45	VQLYDLGLQIHK	R	D	0.997	63.6	25	17	63.6	0	1	8	0	2	1426.81	8761.41	73147700	456	467
Mudpit_Aged L3_4 Posterior NP IAF	Serum amyloid A protein OS=Homo sapiens PE=2 SV=1	B2R5G8		14808.3	3	6	19	AYWDIMISNHQNSDR	R	Y	0.997	59.7	25	16.7	59.7	0	2	3	0	2	1865.82	5891.47	135945000	38	52
Mudpit_Aged L3_4 Posterior NP IAF	Serum amyloid A protein OS=Homo sapiens PE=2 SV=1	B2R5G8		14808.3	3	6	19	EALQGVGDMGR	K	A	0.997	67	25	17.2	67	0	13	0	0	2	1132.54	3632.04	325795000	27	37
Mudpit_Aged L3_4 Posterior NP IAF	Serum amyloid A protein OS=Homo sapiens PE=2 SV=1	B2R5G8		14808.3	3	6	19	GPGGVWAAK	R	L	0.997	51.1	25	16.2	51.1	0	1	0	0	2	842.452	2853.14	6869030	66	74
Mudpit_Aged L3_4 Posterior NP IAF	DnaJ (Hsp40) homolog, subfamily C, member 3 OS=Homo sapiens GN=DNAJC3 PE=2 SV=1	A8KA82,Q13217	DNAJC3	57582.2	3	3	4	AALPDLTK	K	V	0.99	42.3	25	15.6	42.3	0	2	0	0	2	828.483	3694.59	13651900	89	96
Mudpit_Aged L3_4 Posterior NP IAF	DnaJ (Hsp40) homolog, subfamily C, member 3 OS=Homo sapiens GN=DNAJC3 PE=2 SV=1	A8KA82,Q13217	DNAJC3	57582.2	3	3	4	EVLSDPEMR	K	K	0.997	56.7	25	17.4	55.9	0	1	0	0	2	1075.51	3775.39	4539540	447	455
Mudpit_Aged L3_4 Posterior NP IAF	DnaJ (Hsp40) homolog, subfamily C, member 3 OS=Homo sapiens GN=DNAJC3 PE=2 SV=1	A8KA82,Q13217	DNAJC3	57582.2	3	3	4	LIESAEELIR	K	D	0.987	29.6	25.7	14.9	29.6	0	1	0	0	2	1172.65	6327.5	50826400	271	280
Mudpit_Aged L3_4 Posterior NP IAF	Semaphorin-3B OS=Homo sapiens GN=SEMA3B PE=1 SV=1	A0A0C4DGV8,Q13214	SEMA3B	83121.5	3	3	5	AEEAAPAAPPGPK	R	L	0.997	49.4	27.8	16.1	49.4	0	2	0	0	2	1205.62	1968.11	14512600	674	686
Mudpit_Aged L3_4 Posterior NP IAF	Semaphorin-3B OS=Homo sapiens GN=SEMA3B PE=1 SV=1	A0A0C4DGV8,Q13214	SEMA3B	83121.5	3	3	5	ETAVEAAPALGR	R	L	0.996	44.6	31	15.8	44.6	0	1	0	0	2	1184.63	3639.63	13260200	248	259
Mudpit_Aged L3_4 Posterior NP IAF	Semaphorin-3B OS=Homo sapiens GN=SEMA3B PE=1 SV=1	A0A0C4DGV8,Q13214	SEMA3B	83121.5	3	3	5	VFWIPESENPDDDK	K	I	0.994	32	25	15	32	0	2	0	0	2	1690.76	7163.24	7974230	228	241
Mudpit_Aged L3_4 Posterior NP IAF	Putative uncharacterized protein DKFZp686C11235 OS=Homo sapiens GN=DKFZp686C11235 PE=2 SV=1	Q6MZV7	DKFZp686C11235	52120.2	12	17	152	ALPAPIEK	K	T	0.99	35	25	15.2	35	0	11	0	0	2	838.503	3131.55	2194100000	353	360
Mudpit_Aged L3_4 Posterior NP IAF	Putative uncharacterized protein DKFZp686C11235 OS=Homo sapiens GN=DKFZp686C11235 PE=2 SV=1	Q6MZV7	DKFZp686C11235	52120.2	12	17	152	DTLMISRTPEVTCVVVDVSHEDPEVK	K	F	0.987	81.3	25.8	18.1	81.3	0	0	2	0	2	2956.43	8980.77	57104400	275	300
Mudpit_Aged L3_4 Posterior NP IAF	Putative uncharacterized protein DKFZp686C11235 OS=Homo sapiens GN=DKFZp686C11235 PE=2 SV=1	Q6MZV7	DKFZp686C11235	52120.2	12	17	152	EPQVYTLPPSR	R	E	0.997	55.8	26.6	16.5	55.8	0	24	4	0	2	1286.67	4551.75	4651470000	371	381
Mudpit_Aged L3_4 Posterior NP IAF	Putative uncharacterized protein DKFZp686C11235 OS=Homo sapiens GN=DKFZp686C11235 PE=2 SV=1	Q6MZV7	DKFZp686C11235	52120.2	12	17	152	EPQVYTLPPSREEMTK	R	N	0.997	58.6	31.5	16.7	58.6	0	6	0	0	2	1904.94	5454.17	37073600	371	386
Mudpit_Aged L3_4 Posterior NP IAF	Putative uncharacterized protein DKFZp686C11235 OS=Homo sapiens GN=DKFZp686C11235 PE=2 SV=1	Q6MZV7	DKFZp686C11235	52120.2	12	17	152	FNWYVDGVEVHNAK	K	T	0.997	74.3	28.7	17.6	74.3	0	17	22	0	2	1677.8	8453.82	3259590000	301	314
Mudpit_Aged L3_4 Posterior NP IAF	Putative uncharacterized protein DKFZp686C11235 OS=Homo sapiens GN=DKFZp686C11235 PE=2 SV=1	Q6MZV7	DKFZp686C11235	52120.2	12	17	152	GFYPSDIAVEWESNGQPENNYK	K	T	0.997	69.9	25	17.4	69.9	0	8	4	0	2	2544.13	8320.45	819025000	397	418
Mudpit_Aged L3_4 Posterior NP IAF	Putative uncharacterized protein DKFZp686C11235 OS=Homo sapiens GN=DKFZp686C11235 PE=2 SV=1	Q6MZV7	DKFZp686C11235	52120.2	12	17	152	GPSVFPLAPSSK	K	S	0.997	51.1	26.6	16.2	51.1	0	10	0	0	2	1186.65	6006.17	566344000	148	159
Mudpit_Aged L3_4 Posterior NP IAF	Putative uncharacterized protein DKFZp686C11235 OS=Homo sapiens GN=DKFZp686C11235 PE=2 SV=1	Q6MZV7	DKFZp686C11235	52120.2	12	17	152	NQVSLTCLVK	K	G	0.997	42.4	26.9	15.7	42.4	0	3	0	0	2	1162.61	6510.13	48689100	387	396
Mudpit_Aged L3_4 Posterior NP IAF	Putative uncharacterized protein DKFZp686C11235 OS=Homo sapiens GN=DKFZp686C11235 PE=2 SV=1	Q6MZV7	DKFZp686C11235	52120.2	12	17	152	NSLYLQMNSLR	R	A	0.997	41.9	27	45.3	12.3	0	1	0	0	2	1338.68	6966.24	7235770	96	106
Mudpit_Aged L3_4 Posterior NP IAF	Putative uncharacterized protein DKFZp686C11235 OS=Homo sapiens GN=DKFZp686C11235 PE=2 SV=1	Q6MZV7	DKFZp686C11235	52120.2	12	17	152	STSGGTAALGCLVK	K	D	0.997	77.1	28	17.8	77.1	0	3	0	0	2	1322.66	5557.66	20928600	160	173
Mudpit_Aged L3_4 Posterior NP IAF	Putative uncharacterized protein DKFZp686C11235 OS=Homo sapiens GN=DKFZp686C11235 PE=2 SV=1	Q6MZV7	DKFZp686C11235	52120.2	12	17	152	TTPPVLDSDGSFFLYSK	K	L	0.997	99.7	26.1	19.2	99.7	0	29	6	0	2	1873.92	8987.01	3305500000	419	435
Mudpit_Aged L3_4 Posterior NP IAF	Putative uncharacterized protein DKFZp686C11235 OS=Homo sapiens GN=DKFZp686C11235 PE=2 SV=1	Q6MZV7	DKFZp686C11235	52120.2	12	17	152	VVSVLTVLHQDWLNGK	R	E	0.992	49.3	25	16.1	49.3	0	0	2	0	2	1808.01	9199.08	306783000	328	343
Mudpit_Aged L3_4 Posterior NP IAF	Peroxiredoxin-1 (Fragment) OS=Homo sapiens GN=PRDX1 PE=1 SV=1	A0A0A0MSI0,Q06830	PRDX1	22110.9	6	7	8	ATAVMPDGQFK	K	D	0.997	39.9	26.4	15.5	39.9	0	2	0	0	2	1164.57	3186.12	9342460	17	27
Mudpit_Aged L3_4 Posterior NP IAF	Peroxiredoxin-1 (Fragment) OS=Homo sapiens GN=PRDX1 PE=1 SV=1	A0A0A0MSI0,Q06830	PRDX1	22110.9	6	7	8	DISLSDYK	K	G	0.967	28.6	25	14.8	28.6	0	1	0	0	2	940.462	4589.19	7857910	28	35
Mudpit_Aged L3_4 Posterior NP IAF	Peroxiredoxin-1 (Fragment) OS=Homo sapiens GN=PRDX1 PE=1 SV=1	A0A0A0MSI0,Q06830	PRDX1	22110.9	6	7	8	GLFIIDDK	R	G	0.99	37.6	26.1	15.4	37.6	0	1	0	0	2	920.509	6527.81	11957900	129	136
Mudpit_Aged L3_4 Posterior NP IAF	Peroxiredoxin-1 (Fragment) OS=Homo sapiens GN=PRDX1 PE=1 SV=1	A0A0A0MSI0,Q06830	PRDX1	22110.9	6	7	8	LVQAFQFTDK	R	H	0.997	67.6	25	17.2	67.6	0	1	0	0	2	1196.63	6160.86	3774140	159	168
Mudpit_Aged L3_4 Posterior NP IAF	Peroxiredoxin-1 (Fragment) OS=Homo sapiens GN=PRDX1 PE=1 SV=1	A0A0A0MSI0,Q06830	PRDX1	22110.9	6	7	8	QGGLGPMNIPLVSDPK	K	R	0.997	57.9	26.8	16.6	57.9	0	1	0	0	2	1622.86	8278.68	4256450	94	109
Mudpit_Aged L3_4 Posterior NP IAF	Peroxiredoxin-1 (Fragment) OS=Homo sapiens GN=PRDX1 PE=1 SV=1	A0A0A0MSI0,Q06830	PRDX1	22110.9	6	7	8	TIAQDYGVLK	R	A	0.997	45.9	26.3	15.9	45.9	0	2	0	0	2	1107.6	4838.29	23011800	111	120
Mudpit_Aged L3_4 Posterior NP IAF	cDNA, FLJ94534, highly similar to Homo sapiens capping protein (actin filament), gelsolin-like(CAPG), mRNA OS=Homo sapiens PE=2 SV=1	B2R9S4,B4DU58,P40121,V9HW69	CAPG,HEL-S-66	38498.9	3	3	4	EGNPEEDLTADK	K	A	0.997	75.6	25	17.7	75.6	0	1	0	0	2	1317.58	2744.83	2237340	232	243
Mudpit_Aged L3_4 Posterior NP IAF	cDNA, FLJ94534, highly similar to Homo sapiens capping protein (actin filament), gelsolin-like(CAPG), mRNA OS=Homo sapiens PE=2 SV=1	B2R9S4,B4DU58,P40121,V9HW69	CAPG,HEL-S-66	38498.9	3	3	4	QAALQVAEGFISR	R	M	0.997	76.1	26.8	17.8	76.1	0	1	0	0	2	1389.75	8311.61	2700510	307	319
Mudpit_Aged L3_4 Posterior NP IAF	cDNA, FLJ94534, highly similar to Homo sapiens capping protein (actin filament), gelsolin-like(CAPG), mRNA OS=Homo sapiens PE=2 SV=1	B2R9S4,B4DU58,P40121,V9HW69	CAPG,HEL-S-66	38498.9	3	3	4	VSDATGQMNLTK	K	V	0.997	67.1	25.4	17.2	67.1	0	2	0	0	2	1264.62	2718.49	4842250	254	265
Mudpit_Aged L3_4 Posterior NP IAF	Fibromodulin, isoform CRA_a OS=Homo sapiens GN=FMOD PE=4 SV=1	A0A024R971,Q06828	FMOD	43180.4	8	11	40	ELHLDHNQISR	R	V	0.997	61	28.6	19.2	58.7	0	6	7	0	2	1361.69	4291.13	418910000	180	190
Mudpit_Aged L3_4 Posterior NP IAF	Fibromodulin, isoform CRA_a OS=Homo sapiens GN=FMOD PE=4 SV=1	A0A024R971,Q06828	FMOD	43180.4	8	11	40	INEFSISSFCTVVDVVNFSK	R	L	0.997	89.8	27.9	18.6	89.8	0	1	0	0	2	2293.11	9368.28	5719210	325	344
Mudpit_Aged L3_4 Posterior NP IAF	Fibromodulin, isoform CRA_a OS=Homo sapiens GN=FMOD PE=4 SV=1	A0A024R971,Q06828	FMOD	43180.4	8	11	40	IPPVNTNLENLYLQGNR	K	I	0.997	96.2	25	19	96.2	0	9	8	0	2	1955.03	8013.69	957739000	308	324
Mudpit_Aged L3_4 Posterior NP IAF	Fibromodulin, isoform CRA_a OS=Homo sapiens GN=FMOD PE=4 SV=1	A0A024R971,Q06828	FMOD	43180.4	8	11	40	LYLDHNNLTR	R	M	0.946	34	26.5	15.1	34	0	0	1	0	2	1258.65	3888.22	12086500	160	169
Mudpit_Aged L3_4 Posterior NP IAF	Fibromodulin, isoform CRA_a OS=Homo sapiens GN=FMOD PE=4 SV=1	A0A024R971,Q06828	FMOD	43180.4	8	11	40	SAMPADAPLCLR	R	L	0.986	28.4	25	14.8	28.4	0	1	0	0	2	1302.62	6238.03	7707030	358	369
Mudpit_Aged L3_4 Posterior NP IAF	Fibromodulin, isoform CRA_a OS=Homo sapiens GN=FMOD PE=4 SV=1	A0A024R971,Q06828	FMOD	43180.4	8	11	40	SLILLDLSYNHLR	R	K	0.997	76.8	25.3	23.9	70.7	0	2	2	0	2	1556.88	9234.26	127164000	224	236
Mudpit_Aged L3_4 Posterior NP IAF	Fibromodulin, isoform CRA_a OS=Homo sapiens GN=FMOD PE=4 SV=1	A0A024R971,Q06828	FMOD	43180.4	8	11	40	VPDGLPSALEQLYMEHNNVYTVPDSYFR	K	G	0.979	41.7	25.6	15.6	41.7	0	0	1	0	2	3254.55	9384.47	9099060	238	265
Mudpit_Aged L3_4 Posterior NP IAF	Fibromodulin, isoform CRA_a OS=Homo sapiens GN=FMOD PE=4 SV=1	A0A024R971,Q06828	FMOD	43180.4	8	11	40	YLPFVPSR	K	M	0.99	40.5	26.4	21.9	34.1	0	2	0	0	2	978.541	6596.46	34493900	99	106
Mudpit_Aged L3_4 Posterior NP IAF	Annexin OS=Homo sapiens GN=ANXA2 PE=3 SV=1	A0A024R5Z7,P07355,V9HW65	ANXA2,HEL-S-270	38606.1	11	12	19	AEDGSVIDYELIDQDAR	R	D	0.997	119	25	20.5	119	0	2	0	0	2	1908.88	7570.71	4673270	180	196
Mudpit_Aged L3_4 Posterior NP IAF	Annexin OS=Homo sapiens GN=ANXA2 PE=3 SV=1	A0A024R5Z7,P07355,V9HW65	ANXA2,HEL-S-270	38606.1	11	12	19	AYTNFDAER	K	D	0.997	36.6	25	15.3	36.6	0	1	0	0	2	1086.48	2901.7	15237600	29	37
Mudpit_Aged L3_4 Posterior NP IAF	Annexin OS=Homo sapiens GN=ANXA2 PE=3 SV=1	A0A024R5Z7,P07355,V9HW65	ANXA2,HEL-S-270	38606.1	11	12	19	DALNIETAIK	R	T	0.997	49.9	29.9	16.1	49.9	0	3	0	0	2	1087.6	6050.1	41362900	38	47
Mudpit_Aged L3_4 Posterior NP IAF	Annexin OS=Homo sapiens GN=ANXA2 PE=3 SV=1	A0A024R5Z7,P07355,V9HW65	ANXA2,HEL-S-270	38606.1	11	12	19	DIISDTSGDFR	K	K	0.996	36.6	25	15.3	36.6	0	1	0	0	2	1225.57	5890.85	5997320	158	168
Mudpit_Aged L3_4 Posterior NP IAF	Annexin OS=Homo sapiens GN=ANXA2 PE=3 SV=1	A0A024R5Z7,P07355,V9HW65	ANXA2,HEL-S-270	38606.1	11	12	19	GVDEVTIVNILTNR	K	S	0.997	64.8	26.1	17	64.8	0	1	0	0	2	1542.85	9134.35	26470000	50	63
Mudpit_Aged L3_4 Posterior NP IAF	Annexin OS=Homo sapiens GN=ANXA2 PE=3 SV=1	A0A024R5Z7,P07355,V9HW65	ANXA2,HEL-S-270	38606.1	11	12	19	RAEDGSVIDYELIDQDAR	R	D	0.993	49.5	25.4	16.1	49.5	0	0	3	0	2	2064.98	8204.25	18930500	179	196
Mudpit_Aged L3_4 Posterior NP IAF	Annexin OS=Homo sapiens GN=ANXA2 PE=3 SV=1	A0A024R5Z7,P07355,V9HW65	ANXA2,HEL-S-270	38606.1	11	12	19	SLYYYIQQDTK	K	G	0.997	39.9	25	15.5	39.9	0	1	0	0	2	1421.69	5967.82	38039100	314	324
Mudpit_Aged L3_4 Posterior NP IAF	Annexin OS=Homo sapiens GN=ANXA2 PE=3 SV=1	A0A024R5Z7,P07355,V9HW65	ANXA2,HEL-S-270	38606.1	11	12	19	SYSPYDMLESIR	K	K	0.997	65.9	34.6	17.1	65.9	0	3	0	0	2	1476.67	6428.95	26894200	234	245
Mudpit_Aged L3_4 Posterior NP IAF	Annexin OS=Homo sapiens GN=ANXA2 PE=3 SV=1	A0A024R5Z7,P07355,V9HW65	ANXA2,HEL-S-270	38606.1	11	12	19	TDLEKDIISDTSGDFR	K	K	0.986	53	30.2	16.3	53	0	0	2	0	2	1811.87	8692.8	4849800	153	168
Mudpit_Aged L3_4 Posterior NP IAF	Annexin OS=Homo sapiens GN=ANXA2 PE=3 SV=1	A0A024R5Z7,P07355,V9HW65	ANXA2,HEL-S-270	38606.1	11	12	19	TNQELQEINR	R	V	0.997	38.4	25.3	15.4	38.4	0	1	0	0	2	1244.62	2545.99	25618400	136	145
Mudpit_Aged L3_4 Posterior NP IAF	Annexin OS=Homo sapiens GN=ANXA2 PE=3 SV=1	A0A024R5Z7,P07355,V9HW65	ANXA2,HEL-S-270	38606.1	11	12	19	TPAQYDASELK	K	A	0.997	76	26.6	17.7	76	0	1	0	0	2	1222.6	2929.3	5010800	105	115
Mudpit_Aged L3_4 Posterior NP IAF	Immunoglobulin kappa light chain OS=Homo sapiens PE=1 SV=1	IGK_HUMAN		0	3	6	20	ASSLESGVPSR	?	?	0.997	61.8	27	17.7	60.9	0	2	0	0	2	1089.55	2203.33	125355000	0	0
Mudpit_Aged L3_4 Posterior NP IAF	Immunoglobulin kappa light chain OS=Homo sapiens PE=1 SV=1	IGK_HUMAN		0	3	6	20	DIQMTQSPSTLSASVGDR	?	?	0.997	133	25.8	21.3	133	0	11	3	0	2	1892.9	5509.12	111565000	0	0
Mudpit_Aged L3_4 Posterior NP IAF	Immunoglobulin kappa light chain OS=Homo sapiens PE=1 SV=1	IGK_HUMAN		0	3	6	20	GTVAAPSVFIFPPSDEQLK	?	?	0.997	71.8	26	17.5	71.8	0	4	0	0	2	2003.05	9023.93	35954700	0	0
Mudpit_Aged L3_4 Posterior NP IAF	Biotinidase OS=Homo sapiens GN=BTD PE=1 SV=2	P43251	BTD	61133.4	3	3	4	LSSGLVTAALYGR	R	L	0.997	73.9	25	17.6	73.9	0	1	0	0	2	1307.73	6975.08	8591310	526	538
Mudpit_Aged L3_4 Posterior NP IAF	Biotinidase OS=Homo sapiens GN=BTD PE=1 SV=2	P43251	BTD	61133.4	3	3	4	TSIYPFLDFMPSPQVVR	R	W	0.946	32.2	26.7	15	32.2	0	0	1	0	2	1997.02	9366.28	7103400	123	139
Mudpit_Aged L3_4 Posterior NP IAF	Biotinidase OS=Homo sapiens GN=BTD PE=1 SV=2	P43251	BTD	61133.4	3	3	4	VDLITFDTPFAGR	K	F	0.997	73.9	37.4	17.6	73.9	0	2	0	0	2	1451.75	9035.12	45655200	227	239
Mudpit_Aged L3_4 Posterior NP IAF	Angiotensinogen (Serpin peptidase inhibitor, clade A, member 8) OS=Homo sapiens GN=AGT PE=3 SV=1	B0ZBE2,B4E1B3,P01019,Q53GY3,Q53YY1,Q59EP2,Q86U78	AGT	53154.8	7	8	18	ALQDQLVLVAAK	K	L	0.997	69.8	25	17.9	69.3	0	5	0	0	2	1268.76	6642.17	61402500	83	94
Mudpit_Aged L3_4 Posterior NP IAF	Angiotensinogen (Serpin peptidase inhibitor, clade A, member 8) OS=Homo sapiens GN=AGT PE=3 SV=1	B0ZBE2,B4E1B3,P01019,Q53GY3,Q53YY1,Q59EP2,Q86U78	AGT	53154.8	7	8	18	DPTFIPAPIQAK	K	T	0.955	33	25.8	15.1	33	0	1	0	0	2	1297.72	7021.2	29149000	64	75
Mudpit_Aged L3_4 Posterior NP IAF	Angiotensinogen (Serpin peptidase inhibitor, clade A, member 8) OS=Homo sapiens GN=AGT PE=3 SV=1	B0ZBE2,B4E1B3,P01019,Q53GY3,Q53YY1,Q59EP2,Q86U78	AGT	53154.8	7	8	18	FMQAVTGWK	R	T	0.997	44.8	26.8	15.8	44.8	0	2	0	0	2	1083.53	4024.56	27894800	254	262
Mudpit_Aged L3_4 Posterior NP IAF	Angiotensinogen (Serpin peptidase inhibitor, clade A, member 8) OS=Homo sapiens GN=AGT PE=3 SV=1	B0ZBE2,B4E1B3,P01019,Q53GY3,Q53YY1,Q59EP2,Q86U78	AGT	53154.8	7	8	18	LQAILGVPWK	R	D	0.994	36.6	25	15.3	36.6	0	2	0	0	2	1124.68	8339.92	14872000	158	167
Mudpit_Aged L3_4 Posterior NP IAF	Angiotensinogen (Serpin peptidase inhibitor, clade A, member 8) OS=Homo sapiens GN=AGT PE=3 SV=1	B0ZBE2,B4E1B3,P01019,Q53GY3,Q53YY1,Q59EP2,Q86U78	AGT	53154.8	7	8	18	QPFVQGLALYTPVVLPR	K	S	0.987	48.2	25	16	48.2	0	0	1	0	2	1898.09	9152.46	66234900	221	237
Mudpit_Aged L3_4 Posterior NP IAF	Angiotensinogen (Serpin peptidase inhibitor, clade A, member 8) OS=Homo sapiens GN=AGT PE=3 SV=1	B0ZBE2,B4E1B3,P01019,Q53GY3,Q53YY1,Q59EP2,Q86U78	AGT	53154.8	7	8	18	SLDFTELDVAAEK	R	I	0.997	68.4	29.8	17.3	68.4	0	5	0	0	2	1437.71	7656.91	68812600	238	250
Mudpit_Aged L3_4 Posterior NP IAF	Angiotensinogen (Serpin peptidase inhibitor, clade A, member 8) OS=Homo sapiens GN=AGT PE=3 SV=1	B0ZBE2,B4E1B3,P01019,Q53GY3,Q53YY1,Q59EP2,Q86U78	AGT	53154.8	7	8	18	VLSALQAVQGLLVAQGR	K	A	0.997	103	25	19.4	103	0	1	1	0	2	1723.02	9212.57	169083000	180	196
Mudpit_Aged L3_4 Posterior NP IAF	Ezrin OS=Homo sapiens GN=EZR PE=1 SV=3	E7EQR4,P15311,Q6NUR7,V9HW42	EZR,HEL-S-105	69414.7	2	2	2	ALQLEEER	R	K	0.988	35.4	27.7	36.9	13.6	0	1	0	0	2	987.511	2833.97	8512050	372	379
Mudpit_Aged L3_4 Posterior NP IAF	Ezrin OS=Homo sapiens GN=EZR PE=1 SV=3	E7EQR4,P15311,Q6NUR7,V9HW42	EZR,HEL-S-105	69414.7	2	2	2	SQEQLAAELAEYTAK	K	I	0.997	53.5	27.1	16.3	53.5	0	1	0	0	2	1651.82	7695.66	3504550	413	427
Mudpit_Aged L3_4 Posterior NP IAF	Peptidyl-prolyl cis-trans isomerase OS=Homo sapiens PE=2 SV=1	A8K2Q6,P45877	PPIC	22763.5	2	2	2	IVIGLFGK	R	V	0.99	37.9	25	15.4	37.9	0	1	0	0	2	846.545	7090.96	11481400	54	61
Mudpit_Aged L3_4 Posterior NP IAF	Peptidyl-prolyl cis-trans isomerase OS=Homo sapiens PE=2 SV=1	A8K2Q6,P45877	PPIC	22763.5	2	2	2	TVENFVALATGEK	K	G	0.997	60.6	27.2	16.8	60.6	0	1	0	0	2	1378.72	8218.62	6504070	66	78
Mudpit_Aged L3_4 Posterior NP IAF	Alpha-crystallin B chain (Fragment) OS=Homo sapiens GN=CRYAB PE=2 SV=1	A0A140G961_HUMAN,C3VMY8,E9PR44,P02511,V9HW27	CRYAB,HEL-S-101	20159.5	3	4	6	APSWFDTGLSEMR	R	L	0.997	45.4	25	15.8	45.4	0	3	0	0	2	1496.68	8831.38	10356700	57	69
Mudpit_Aged L3_4 Posterior NP IAF	Alpha-crystallin B chain (Fragment) OS=Homo sapiens GN=CRYAB PE=2 SV=1	A0A140G961_HUMAN,C3VMY8,E9PR44,P02511,V9HW27	CRYAB,HEL-S-101	20159.5	3	4	6	FSVNLDVK	R	H	0.99	40.9	27.2	17.2	39.2	0	1	0	0	2	921.504	5419.48	8488030	75	82
Mudpit_Aged L3_4 Posterior NP IAF	Alpha-crystallin B chain (Fragment) OS=Homo sapiens GN=CRYAB PE=2 SV=1	A0A140G961_HUMAN,C3VMY8,E9PR44,P02511,V9HW27	CRYAB,HEL-S-101	20159.5	3	4	6	VLGDVIEVHGK	K	H	0.994	62.4	25.6	16.9	62.4	0	0	2	0	2	1165.66	5325.51	8327960	93	103
Mudpit_Aged L3_4 Posterior NP IAF	Heat shock cognate 71 kDa protein OS=Homo sapiens GN=HSPA8 PE=1 SV=1	E9PKE3,P11142,V9HW22	HEL-S-72p,HSPA8	70899.8	2	2	2	FEELNADLFR	R	G	0.997	57.3	26.6	16.6	57.3	0	1	0	0	2	1253.62	7364.37	8353590	302	311
Mudpit_Aged L3_4 Posterior NP IAF	Heat shock cognate 71 kDa protein OS=Homo sapiens GN=HSPA8 PE=1 SV=1	E9PKE3,P11142,V9HW22	HEL-S-72p,HSPA8	70899.8	2	2	2	TTPSYVAFTDTER	R	L	0.997	35.7	25.1	15.2	35.7	0	1	0	0	2	1487.7	5440.25	6475150	37	49
Mudpit_Aged L3_4 Posterior NP IAF	Serine protease HTRA3 OS=Homo sapiens GN=HTRA3 PE=1 SV=2	P83110	HTRA3	48608.5	8	8	21	ALQLSGTPVR	R	Q	0.991	34.2	25.1	15.6	33.7	0	2	0	0	2	1041.61	4176.25	18258200	110	119
Mudpit_Aged L3_4 Posterior NP IAF	Serine protease HTRA3 OS=Homo sapiens GN=HTRA3 PE=1 SV=2	P83110	HTRA3	48608.5	8	8	21	ASNPDFPEVSSGIYVQEVAPNSPSQR	K	G	0.997	70	25	17.4	70	0	3	0	0	2	2775.32	7345.8	27814200	374	399
Mudpit_Aged L3_4 Posterior NP IAF	Serine protease HTRA3 OS=Homo sapiens GN=HTRA3 PE=1 SV=2	P83110	HTRA3	48608.5	8	8	21	FLTEFQDK	R	Q	0.99	42.1	25	21.2	36.5	0	4	0	0	2	1027.51	4742.76	77286800	340	347
Mudpit_Aged L3_4 Posterior NP IAF	Serine protease HTRA3 OS=Homo sapiens GN=HTRA3 PE=1 SV=2	P83110	HTRA3	48608.5	8	8	21	FNFIADVVEK	K	I	0.997	55.8	26.5	16.5	55.8	0	2	0	0	2	1181.62	8629.68	26279400	140	149
Mudpit_Aged L3_4 Posterior NP IAF	Serine protease HTRA3 OS=Homo sapiens GN=HTRA3 PE=1 SV=2	P83110	HTRA3	48608.5	8	8	21	GGIQDGDIIVK	R	V	0.997	66.8	27.7	17.2	66.8	0	1	0	0	2	1114.61	4755.93	39697000	400	410
Mudpit_Aged L3_4 Posterior NP IAF	Serine protease HTRA3 OS=Homo sapiens GN=HTRA3 PE=1 SV=2	P83110	HTRA3	48608.5	8	8	21	RGNDDLLFSIAPEVVM	R	-	0.997	63.3	27.6	17	63.3	0	1	0	0	2	1791.89	9192.26	13053300	438	453
Mudpit_Aged L3_4 Posterior NP IAF	Serine protease HTRA3 OS=Homo sapiens GN=HTRA3 PE=1 SV=2	P83110	HTRA3	48608.5	8	8	21	TITPSLVDELK	R	A	0.997	51.2	26.3	16.2	51.2	0	4	0	0	2	1215.68	6467.96	63961700	363	373
Mudpit_Aged L3_4 Posterior NP IAF	Serine protease HTRA3 OS=Homo sapiens GN=HTRA3 PE=1 SV=2	P83110	HTRA3	48608.5	8	8	21	VTAGISFAIPSDR	K	I	0.997	115	27	20.2	115	0	4	0	0	2	1333.71	7185.82	50990200	324	336
Mudpit_Aged L3_4 Posterior NP IAF	Tenascin-X OS=Homo sapiens GN=TNXB PE=1 SV=1	A0A140TA33_HUMAN		0	12	12	15	AGDEAVFAQYDSFHVDSAAEYYR	?	?	0.994	61.9	25	16.9	61.9	0	0	1	0	2	2611.14	9101.95	16489500	0	0
Mudpit_Aged L3_4 Posterior NP IAF	Tenascin-X OS=Homo sapiens GN=TNXB PE=1 SV=1	A0A140TA33_HUMAN		0	12	12	15	AVAVSGLDPAR	?	?	0.997	40.6	25.7	15.5	40.6	0	1	0	0	2	1055.58	3798.19	6125550	0	0
Mudpit_Aged L3_4 Posterior NP IAF	Tenascin-X OS=Homo sapiens GN=TNXB PE=1 SV=1	A0A140TA33_HUMAN		0	12	12	15	DAQGQPQAVPVSGDLR	?	?	0.997	68.3	26.2	17.3	68.3	0	1	0	0	2	1637.82	4458.87	4752960	0	0
Mudpit_Aged L3_4 Posterior NP IAF	Tenascin-X OS=Homo sapiens GN=TNXB PE=1 SV=1	A0A140TA33_HUMAN		0	12	12	15	EVTVQGLEPSR	?	?	0.996	37.6	26.1	15.3	37.6	0	1	0	0	2	1214.64	4216.19	6107880	0	0
Mudpit_Aged L3_4 Posterior NP IAF	Tenascin-X OS=Homo sapiens GN=TNXB PE=1 SV=1	A0A140TA33_HUMAN		0	12	12	15	FDSFTVQYK	?	?	0.997	45.9	26.3	15.9	45.9	0	3	0	0	2	1134.55	5578.34	16282000	0	0
Mudpit_Aged L3_4 Posterior NP IAF	Tenascin-X OS=Homo sapiens GN=TNXB PE=1 SV=1	A0A140TA33_HUMAN		0	12	12	15	GEESEVTVGGLEPGR	?	?	0.997	58.6	31.4	16.7	58.6	0	1	0	0	2	1515.73	5055.36	4337700	0	0
Mudpit_Aged L3_4 Posterior NP IAF	Tenascin-X OS=Homo sapiens GN=TNXB PE=1 SV=1	A0A140TA33_HUMAN		0	12	12	15	LGPISADSTTAPLEK	?	?	0.997	66.2	25.9	17.1	66.2	0	1	0	0	2	1499.8	5337.14	3426300	0	0
Mudpit_Aged L3_4 Posterior NP IAF	Tenascin-X OS=Homo sapiens GN=TNXB PE=1 SV=1	A0A140TA33_HUMAN		0	12	12	15	LGVLTVTDTTPDSMR	?	?	0.994	34.4	27.7	15.1	34.4	0	1	0	0	2	1605.82	6932.47	2147960	0	0
Mudpit_Aged L3_4 Posterior NP IAF	Tenascin-X OS=Homo sapiens GN=TNXB PE=1 SV=1	A0A140TA33_HUMAN		0	12	12	15	LQGLIPGAR	?	?	0.96	26	25	14.6	26	0	1	0	0	2	924.563	4849.65	5440240	0	0
Mudpit_Aged L3_4 Posterior NP IAF	Tenascin-X OS=Homo sapiens GN=TNXB PE=1 SV=1	A0A140TA33_HUMAN		0	12	12	15	LSQLSVTDVTTSSLR	?	?	0.997	43.4	26.5	15.7	43.4	0	1	0	0	2	1606.86	6851.75	2637370	0	0
Mudpit_Aged L3_4 Posterior NP IAF	Tenascin-X OS=Homo sapiens GN=TNXB PE=1 SV=1	A0A140TA33_HUMAN		0	12	12	15	SVTVTPLDAGR	?	?	0.994	37.3	30.2	15.3	37.3	0	1	0	0	2	1115.61	3953.12	3574230	0	0
Mudpit_Aged L3_4 Posterior NP IAF	Tenascin-X OS=Homo sapiens GN=TNXB PE=1 SV=1	A0A140TA33_HUMAN		0	12	12	15	YEVTVVSVR	?	?	0.997	48.5	25	16	48.5	0	2	0	0	2	1051.58	4773.61	30887100	0	0
Mudpit_Aged L3_4 Posterior NP IAF	cDNA FLJ60461, highly similar to Peroxiredoxin-2 (EC 1.11.1.15) OS=Homo sapiens PE=2 SV=1	B4DF70,P32119,V9HW12	HEL-S-2a,PRDX2	21892.4	2	2	2	ATAVVDGAFK	K	E	0.997	41.2	28.2	15.6	41.2	0	1	0	0	2	978.525	3379.53	9206070	17	26
Mudpit_Aged L3_4 Posterior NP IAF	cDNA FLJ60461, highly similar to Peroxiredoxin-2 (EC 1.11.1.15) OS=Homo sapiens PE=2 SV=1	B4DF70,P32119,V9HW12	HEL-S-2a,PRDX2	21892.4	2	2	2	EGGLGPLNIPLLADVTR	K	R	0.997	63	25	16.9	63	0	1	0	0	2	1734.98	9406.13	8395980	93	109
Mudpit_Aged L3_4 Posterior NP IAF	Ficolin-3 OS=Homo sapiens GN=FCN3 PE=1 SV=2	O75636	FCN3	32903.3	3	4	5	LLGEVDHYQLALGK	R	F	0.994	38.3	25.9	15.4	38.3	0	1	2	0	2	1555.85	8628.99	19438400	200	213
Mudpit_Aged L3_4 Posterior NP IAF	Ficolin-3 OS=Homo sapiens GN=FCN3 PE=1 SV=2	O75636	FCN3	32903.3	3	4	5	QDGSVDFFR	R	S	0.997	50.7	25	16.2	50.7	0	1	0	0	2	1070.49	5528.88	10859300	137	145
Mudpit_Aged L3_4 Posterior NP IAF	Ficolin-3 OS=Homo sapiens GN=FCN3 PE=1 SV=2	O75636	FCN3	32903.3	3	4	5	YGIDWASGR	K	G	0.976	27.7	26.6	14.7	27.7	0	1	0	0	2	1024.48	5230.71	19578100	277	285
Mudpit_Aged L3_4 Posterior NP IAF	Nuclear envelope protein okuribin OS=Homo sapiens GN=okuribin PE=2 SV=1	A3KC71,Q76M96	CCDC80,okuribin	108176	16	25	66	ASGVEGQVVAEGNDGGGGAGRPSLGSEK	K	K	0.996	64.6	26.4	17	64.6	0	0	3	0	2	2542.21	4368.27	32075500	283	310
Mudpit_Aged L3_4 Posterior NP IAF	Nuclear envelope protein okuribin OS=Homo sapiens GN=okuribin PE=2 SV=1	A3KC71,Q76M96	CCDC80,okuribin	108176	16	25	66	EDVPAHLVK	R	D	0.997	44.3	27.3	15.8	44.3	0	1	0	0	2	1007.55	3732.36	7677320	843	851
Mudpit_Aged L3_4 Posterior NP IAF	Nuclear envelope protein okuribin OS=Homo sapiens GN=okuribin PE=2 SV=1	A3KC71,Q76M96	CCDC80,okuribin	108176	16	25	66	FPSGSSSPNILASFAGK	R	N	0.997	90.7	27.7	18.7	90.7	0	2	0	0	2	1666.84	8134.9	24560700	132	148
Mudpit_Aged L3_4 Posterior NP IAF	Nuclear envelope protein okuribin OS=Homo sapiens GN=okuribin PE=2 SV=1	A3KC71,Q76M96	CCDC80,okuribin	108176	16	25	66	HIQQIVLFHQAGEEGGK	R	V	0.966	35	27.6	15.2	35	0	0	2	0	2	1890.98	10528.7	2088100	183	199
Mudpit_Aged L3_4 Posterior NP IAF	Nuclear envelope protein okuribin OS=Homo sapiens GN=okuribin PE=2 SV=1	A3KC71,Q76M96	CCDC80,okuribin	108176	16	25	66	IDHFQLDNEKPMR	K	V	0.974	33.7	26.5	15.1	33.7	0	0	0	1	2	1642.8	6334.44	7265000	673	685
Mudpit_Aged L3_4 Posterior NP IAF	Nuclear envelope protein okuribin OS=Homo sapiens GN=okuribin PE=2 SV=1	A3KC71,Q76M96	CCDC80,okuribin	108176	16	25	66	ITSEGQILEQPLDPSLIPK	R	L	0.997	62	25	16.9	62	0	5	2	0	2	2078.14	8892.99	141939000	203	221
Mudpit_Aged L3_4 Posterior NP IAF	Nuclear envelope protein okuribin OS=Homo sapiens GN=okuribin PE=2 SV=1	A3KC71,Q76M96	CCDC80,okuribin	108176	16	25	66	LEAMYEVIDQGPIR	R	R	0.997	80.7	30.1	18	80.7	0	10	1	0	2	1633.83	7547.12	97299800	254	267
Mudpit_Aged L3_4 Posterior NP IAF	Nuclear envelope protein okuribin OS=Homo sapiens GN=okuribin PE=2 SV=1	A3KC71,Q76M96	CCDC80,okuribin	108176	16	25	66	LLLITAPK	R	A	0.99	60.8	25	16.8	60.8	0	2	0	0	2	868.587	5819.17	17831400	625	632
Mudpit_Aged L3_4 Posterior NP IAF	Nuclear envelope protein okuribin OS=Homo sapiens GN=okuribin PE=2 SV=1	A3KC71,Q76M96	CCDC80,okuribin	108176	16	25	66	NYFQVSPEYFSMLLVGK	R	D	0.997	55.5	26.4	16.5	55.5	0	3	1	0	2	2022	9389.81	24257200	855	871
Mudpit_Aged L3_4 Posterior NP IAF	Nuclear envelope protein okuribin OS=Homo sapiens GN=okuribin PE=2 SV=1	A3KC71,Q76M96	CCDC80,okuribin	108176	16	25	66	QEMAIQQSLGMR	R	C	0.997	76.7	25.6	17.8	74.8	0	7	0	0	2	1407.67	4066.7	37529600	901	912
Mudpit_Aged L3_4 Posterior NP IAF	Nuclear envelope protein okuribin OS=Homo sapiens GN=okuribin PE=2 SV=1	A3KC71,Q76M96	CCDC80,okuribin	108176	16	25	66	QSLENFLSR	K	F	0.997	68.6	26.5	23.9	62	0	4	0	0	2	1093.56	6823.26	50772600	766	774
Mudpit_Aged L3_4 Posterior NP IAF	Nuclear envelope protein okuribin OS=Homo sapiens GN=okuribin PE=2 SV=1	A3KC71,Q76M96	CCDC80,okuribin	108176	16	25	66	QYYEVPITMK	K	S	0.997	39.4	25	15.5	39.4	0	2	0	0	2	1271.63	6290.65	52736900	725	734
Mudpit_Aged L3_4 Posterior NP IAF	Nuclear envelope protein okuribin OS=Homo sapiens GN=okuribin PE=2 SV=1	A3KC71,Q76M96	CCDC80,okuribin	108176	16	25	66	SVADLLGSFEGK	K	R	0.997	75	26.9	17.7	75	0	6	0	0	2	1222.63	8533.86	42752400	611	622
Mudpit_Aged L3_4 Posterior NP IAF	Nuclear envelope protein okuribin OS=Homo sapiens GN=okuribin PE=2 SV=1	A3KC71,Q76M96	CCDC80,okuribin	108176	16	25	66	SVFDLIDTFQSR	K	I	0.997	64.5	26.4	17	64.5	0	6	1	0	2	1427.72	9228.81	272174000	735	746
Mudpit_Aged L3_4 Posterior NP IAF	Nuclear envelope protein okuribin OS=Homo sapiens GN=okuribin PE=2 SV=1	A3KC71,Q76M96	CCDC80,okuribin	108176	16	25	66	VVDDEDLVDQR	R	L	0.997	90.5	25	18.7	90.5	0	3	0	0	2	1302.62	3750.05	52020800	686	696
Mudpit_Aged L3_4 Posterior NP IAF	Nuclear envelope protein okuribin OS=Homo sapiens GN=okuribin PE=2 SV=1	A3KC71,Q76M96	CCDC80,okuribin	108176	16	25	66	VWVISAPHASEGYYR	R	L	0.997	52.1	26.2	16.3	52.1	0	1	3	0	2	1734.86	7861.21	82161600	151	165
Mudpit_Aged L3_4 Posterior NP IAF	Histone H4 OS=Homo sapiens GN=HIST1H4J PE=2 SV=1	B2R4R0,P62805,Q0VAS5	HIST1H4A,HIST1H4H,HIST1H4J	11367.7	4	4	6	DNIQGITKPAIR	R	R	0.991	48	25.4	16	48	0	0	1	0	2	1325.75	3855.57	8421110	25	36
Mudpit_Aged L3_4 Posterior NP IAF	Histone H4 OS=Homo sapiens GN=HIST1H4J PE=2 SV=1	B2R4R0,P62805,Q0VAS5	HIST1H4A,HIST1H4H,HIST1H4J	11367.7	4	4	6	ISGLIYEETR	R	G	0.997	56.8	26.8	16.6	56.8	0	2	0	0	2	1180.62	4914.84	25490800	47	56
Mudpit_Aged L3_4 Posterior NP IAF	Histone H4 OS=Homo sapiens GN=HIST1H4J PE=2 SV=1	B2R4R0,P62805,Q0VAS5	HIST1H4A,HIST1H4H,HIST1H4J	11367.7	4	4	6	TVTAMDVVYALK	K	R	0.997	55.1	25.6	16.4	55.1	0	2	0	0	2	1310.7	8719.37	11726500	81	92
Mudpit_Aged L3_4 Posterior NP IAF	Histone H4 OS=Homo sapiens GN=HIST1H4J PE=2 SV=1	B2R4R0,P62805,Q0VAS5	HIST1H4A,HIST1H4H,HIST1H4J	11367.7	4	4	6	VFLENVIR	K	D	0.99	37.5	25.6	21.6	31.2	0	1	0	0	2	989.578	7058.28	5354480	61	68
Mudpit_Aged L3_4 Posterior NP IAF	Testis tissue sperm-binding protein Li 70n OS=Homo sapiens PE=2 SV=1	A0A140VKF3_HUMAN,P36955	SERPINF1	46314.3	12	14	49	ALYYDLISSPDIHGTYK	R	E	0.997	71.1	27	17.4	71.1	0	1	4	0	2	1955.98	8982.36	67168000	107	123
Mudpit_Aged L3_4 Posterior NP IAF	Testis tissue sperm-binding protein Li 70n OS=Homo sapiens PE=2 SV=1	A0A140VKF3_HUMAN,P36955	SERPINF1	46314.3	12	14	49	DTDTGALLFIGK	R	I	0.997	60	26.6	16.8	60	0	3	0	0	2	1250.66	8194.04	17193800	400	411
Mudpit_Aged L3_4 Posterior NP IAF	Testis tissue sperm-binding protein Li 70n OS=Homo sapiens PE=2 SV=1	A0A140VKF3_HUMAN,P36955	SERPINF1	46314.3	12	14	49	ELLDTVTAPQK	K	N	0.997	77.5	27.7	20	75.4	0	6	0	0	2	1214.66	4666.46	35828900	124	134
Mudpit_Aged L3_4 Posterior NP IAF	Testis tissue sperm-binding protein Li 70n OS=Homo sapiens PE=2 SV=1	A0A140VKF3_HUMAN,P36955	SERPINF1	46314.3	12	14	49	LAAAVSNFGYDLYR	K	V	0.997	62.1	26.1	16.9	62.1	0	3	0	0	2	1559.79	7968.62	47972100	54	67
Mudpit_Aged L3_4 Posterior NP IAF	Testis tissue sperm-binding protein Li 70n OS=Homo sapiens PE=2 SV=1	A0A140VKF3_HUMAN,P36955	SERPINF1	46314.3	12	14	49	LDLQEINNWVQAQMK	R	G	0.997	63	26.7	16.9	63	0	4	0	0	2	1845.92	9279.62	90235400	175	189
Mudpit_Aged L3_4 Posterior NP IAF	Testis tissue sperm-binding protein Li 70n OS=Homo sapiens PE=2 SV=1	A0A140VKF3_HUMAN,P36955	SERPINF1	46314.3	12	14	49	LQSLFDSPDFSK	K	I	0.997	65	25.5	17.1	65	0	5	0	0	2	1383.68	7382.02	79895000	334	345
Mudpit_Aged L3_4 Posterior NP IAF	Testis tissue sperm-binding protein Li 70n OS=Homo sapiens PE=2 SV=1	A0A140VKF3_HUMAN,P36955	SERPINF1	46314.3	12	14	49	LSYEGEVTK	K	S	0.997	53.3	26.1	17.3	52.3	0	6	0	0	2	1025.52	2618.79	62838800	319	327
Mudpit_Aged L3_4 Posterior NP IAF	Testis tissue sperm-binding protein Li 70n OS=Homo sapiens PE=2 SV=1	A0A140VKF3_HUMAN,P36955	SERPINF1	46314.3	12	14	49	SSFVAPLEK	K	S	0.997	51	27.6	16.2	51	0	2	0	0	2	977.53	4606.61	87961100	152	160
Mudpit_Aged L3_4 Posterior NP IAF	Testis tissue sperm-binding protein Li 70n OS=Homo sapiens PE=2 SV=1	A0A140VKF3_HUMAN,P36955	SERPINF1	46314.3	12	14	49	SSTSPTTNVLLSPLSVATALSALSLGAEQR	R	T	0.971	82.4	25	18.2	82.4	0	0	1	0	2	2971.59	9530.99	2605550	70	99
Mudpit_Aged L3_4 Posterior NP IAF	Testis tissue sperm-binding protein Li 70n OS=Homo sapiens PE=2 SV=1	A0A140VKF3_HUMAN,P36955	SERPINF1	46314.3	12	14	49	TSLEDFYLDEER	K	T	0.997	93.7	25	18.9	93.7	0	7	0	0	2	1516.68	7209.1	33878400	226	237
Mudpit_Aged L3_4 Posterior NP IAF	Testis tissue sperm-binding protein Li 70n OS=Homo sapiens PE=2 SV=1	A0A140VKF3_HUMAN,P36955	SERPINF1	46314.3	12	14	49	TVQAVLTVPK	K	L	0.997	48	25	16	48	0	4	0	0	2	1055.65	5036.92	70150000	307	316
Mudpit_Aged L3_4 Posterior NP IAF	Testis tissue sperm-binding protein Li 70n OS=Homo sapiens PE=2 SV=1	A0A140VKF3_HUMAN,P36955	SERPINF1	46314.3	12	14	49	VPMMSDPK	R	A	0.99	30.2	25	17.2	0	0	3	0	0	2	920.422	1669.15	1526340	241	248
Mudpit_Aged L3_4 Posterior NP IAF	Immunoglobulin heavy variable 5-51 OS=Homo sapiens GN=IGHV5-51 PE=3 SV=1	HV551_HUMAN		0	3	4	9	GLEWMGIIYPGDSDTR	?	?	0.997	63.6	25.4	17	63.6	0	2	0	0	2	1809.85	8861.98	29578700	0	0
Mudpit_Aged L3_4 Posterior NP IAF	Immunoglobulin heavy variable 5-51 OS=Homo sapiens GN=IGHV5-51 PE=3 SV=1	HV551_HUMAN		0	3	4	9	SISTAYLQWSSLK	?	?	0.997	69.1	26	17.3	69.1	0	2	0	0	2	1483.78	8110.17	15824600	0	0
Mudpit_Aged L3_4 Posterior NP IAF	Immunoglobulin heavy variable 5-51 OS=Homo sapiens GN=IGHV5-51 PE=3 SV=1	HV551_HUMAN		0	3	4	9	YSPSFQGQVTISADK	?	?	0.997	93.5	26.1	18.8	93.5	0	5	0	0	2	1627.8	5380.93	38671100	0	0
Mudpit_Aged L3_4 Posterior NP IAF	Beta-2-microglobulin OS=Homo sapiens PE=2 SV=1	B4E0X1,P61769	B2M	13714.9	2	3	5	VEHSDLSFSK	K	D	0.986	40	25.8	15.5	40	0	1	2	0	2	1148.56	3178.51	18101800	69	78
Mudpit_Aged L3_4 Posterior NP IAF	Beta-2-microglobulin OS=Homo sapiens PE=2 SV=1	B4E0X1,P61769	B2M	13714.9	2	3	5	VNHVTLSQPK	R	I	0.981	41.5	25.6	15.6	41.5	0	0	2	0	2	1122.63	2940.88	12010400	102	111
Mudpit_Aged L3_4 Posterior NP IAF	ASPN protein OS=Homo sapiens GN=ASPN PE=2 SV=1	Q6P528,Q9BXN1	ASPN	43419.8	4	4	7	IPSGLPELK	K	Y	0.996	35.8	25	32.7	18.4	0	3	0	0	2	953.567	5772.24	43152400	304	312
Mudpit_Aged L3_4 Posterior NP IAF	ASPN protein OS=Homo sapiens GN=ASPN PE=2 SV=1	Q6P528,Q9BXN1	ASPN	43419.8	4	4	7	ISTVELEDFK	K	R	0.997	63	26.8	16.9	63	0	1	0	0	2	1180.61	6459.26	12433500	253	262
Mudpit_Aged L3_4 Posterior NP IAF	ASPN protein OS=Homo sapiens GN=ASPN PE=2 SV=1	Q6P528,Q9BXN1	ASPN	43419.8	4	4	7	ISTVELEDFKR	K	Y	0.99	46.1	25.8	15.9	46.1	0	0	2	0	2	1336.71	5863.44	28752400	253	263
Mudpit_Aged L3_4 Posterior NP IAF	ASPN protein OS=Homo sapiens GN=ASPN PE=2 SV=1	Q6P528,Q9BXN1	ASPN	43419.8	4	4	7	YWEMQPATFR	K	C	0.995	33.5	25	15.1	33.5	0	1	0	0	2	1328.61	7104.17	33810900	356	365
Mudpit_Aged L3_4 Posterior NP IAF	Complement component C6 OS=Homo sapiens GN=C6 PE=1 SV=3	P13671	C6	104786	8	12	34	ALNHLPLEYNSALYSR	K	I	0.997	56.3	28.3	16.5	56.3	0	2	3	0	2	1860.96	8837.67	57442000	341	356
Mudpit_Aged L3_4 Posterior NP IAF	Complement component C6 OS=Homo sapiens GN=C6 PE=1 SV=3	P13671	C6	104786	8	12	34	DLHLSDVFLK	K	A	0.997	45.4	26.6	19.5	41.7	0	2	4	0	2	1186.65	9004.3	80268000	331	340
Mudpit_Aged L3_4 Posterior NP IAF	Complement component C6 OS=Homo sapiens GN=C6 PE=1 SV=3	P13671	C6	104786	8	12	34	ENPAVIDFELAPIVDLVR	K	N	0.997	81.2	25.4	18.1	81.2	0	3	1	0	2	2010.09	9597.23	20143300	478	495
Mudpit_Aged L3_4 Posterior NP IAF	Complement component C6 OS=Homo sapiens GN=C6 PE=1 SV=3	P13671	C6	104786	8	12	34	QLEWGLER	R	T	0.99	38.9	28.3	32.6	21.8	0	1	0	0	2	1030.53	5805.32	10810900	842	849
Mudpit_Aged L3_4 Posterior NP IAF	Complement component C6 OS=Homo sapiens GN=C6 PE=1 SV=3	P13671	C6	104786	8	12	34	SEYGAALAWEK	R	G	0.997	52.3	25	16.3	52.3	0	4	0	0	2	1224.59	5906.93	48872600	449	459
Mudpit_Aged L3_4 Posterior NP IAF	Complement component C6 OS=Homo sapiens GN=C6 PE=1 SV=3	P13671	C6	104786	8	12	34	TFSEWLESVK	K	E	0.997	52.6	25	16.3	52.6	0	3	0	0	2	1225.61	8386.65	144821000	468	477
Mudpit_Aged L3_4 Posterior NP IAF	Complement component C6 OS=Homo sapiens GN=C6 PE=1 SV=3	P13671	C6	104786	8	12	34	VPANLENVGFEVQTAEDDLK	R	T	0.997	169	27.5	23.6	169	0	8	2	0	2	2188.08	8751.81	148251000	232	251
Mudpit_Aged L3_4 Posterior NP IAF	Complement component C6 OS=Homo sapiens GN=C6 PE=1 SV=3	P13671	C6	104786	8	12	34	YNPIPSVQLMGNGFHFLAGEPR	K	G	0.994	56.5	26.8	16.5	56.5	0	0	1	0	2	2444.22	9236.13	18466000	184	205
Mudpit_Aged L3_4 Posterior NP IAF	Collagen, type I, alpha 1, isoform CRA_a OS=Homo sapiens GN=COL1A1 PE=4 SV=1	D3DTX7	COL1A1	84740.7	2	3	9	GETGPAGPAGPVGPVGAR	R	G	0.997	90.7	30.4	18.7	90.7	0	6	0	0	2	1546.8	3817.47	45409200	488	505
Mudpit_Aged L3_4 Posterior NP IAF	Collagen, type I, alpha 1, isoform CRA_a OS=Homo sapiens GN=COL1A1 PE=4 SV=1	D3DTX7	COL1A1	84740.7	2	3	9	SGDRGETGPAGPAGPVGPVGAR	K	G	0.997	63.4	27	17	63.4	0	1	2	0	2	1961.98	3786.91	42751000	484	505
Mudpit_Aged L3_4 Posterior NP IAF	Insulin-like growth factor binding protein 7, isoform CRA_a (Fragment) OS=Homo sapiens GN=IGFBP7 PE=4 SV=1	A0A024RDA6,Q16270	IGFBP7	29129.8	2	2	3	ITVVDALHEIPVK	K	K	0.995	61.3	25	16.8	61.3	0	0	2	0	2	1433.84	7921.91	11276200	263	275
Mudpit_Aged L3_4 Posterior NP IAF	Insulin-like growth factor binding protein 7, isoform CRA_a (Fragment) OS=Homo sapiens GN=IGFBP7 PE=4 SV=1	A0A024RDA6,Q16270	IGFBP7	29129.8	2	2	3	TELLPGDR	R	D	0.981	29	25	14.8	29	0	1	0	0	2	900.479	3171.95	4532810	206	213
Mudpit_Aged L3_4 Posterior NP IAF	Vascular endothelial growth factor receptor 1 OS=Homo sapiens GN=FLT1 PE=1 SV=1	A0A1W2PNW4_HUMAN,L7RSL3,P17948	FLT1	150774	4	4	6	AVSSFPDPALYPLGSR	K	Q	0.997	48	27.5	16	48	0	2	0	0	2	1676.86	8317.32	7690350	434	449
Mudpit_Aged L3_4 Posterior NP IAF	Vascular endothelial growth factor receptor 1 OS=Homo sapiens GN=FLT1 PE=1 SV=1	A0A1W2PNW4_HUMAN,L7RSL3,P17948	FLT1	150774	4	4	6	MPTEGEDLK	K	L	0.991	31.2	25	14.9	31.2	0	1	0	0	2	1019.47	2313.45	7716180	566	574
Mudpit_Aged L3_4 Posterior NP IAF	Vascular endothelial growth factor receptor 1 OS=Homo sapiens GN=FLT1 PE=1 SV=1	A0A1W2PNW4_HUMAN,L7RSL3,P17948	FLT1	150774	4	4	6	NVYTGEEILQK	R	K	0.984	30.4	27.2	14.9	30.4	0	1	0	0	2	1293.67	4751.6	5682930	640	650
Mudpit_Aged L3_4 Posterior NP IAF	Vascular endothelial growth factor receptor 1 OS=Homo sapiens GN=FLT1 PE=1 SV=1	A0A1W2PNW4_HUMAN,L7RSL3,P17948	FLT1	150774	4	4	6	QQVLETVAGK	K	R	0.997	55.8	27	19.7	52.5	0	2	0	0	2	1072.6	3043.44	5730720	341	350
Mudpit_Aged L3_4 Posterior NP IAF	Stem cell growth factor; lymphocyte secreted C-type lectin OS=Homo sapiens PE=2 SV=1	Q5U0B9,Q9Y240	CLEC11A	35694.4	6	7	17	AALAPYNWPVWLGVHDR	R	R	0.996	66.4	26.8	17.2	66.4	0	0	4	0	2	1965.01	9240.04	54551900	229	245
Mudpit_Aged L3_4 Posterior NP IAF	Stem cell growth factor; lymphocyte secreted C-type lectin OS=Homo sapiens PE=2 SV=1	Q5U0B9,Q9Y240	CLEC11A	35694.4	6	7	17	DAVQALQEAQGR	R	A	0.997	58	25.4	23.2	51.4	0	5	0	0	2	1285.65	5422.67	47514500	155	166
Mudpit_Aged L3_4 Posterior NP IAF	Stem cell growth factor; lymphocyte secreted C-type lectin OS=Homo sapiens PE=2 SV=1	Q5U0B9,Q9Y240	CLEC11A	35694.4	6	7	17	DFEAQAAAQAR	R	C	0.997	65.4	30.8	17.1	65.4	0	1	0	0	2	1177.56	3187.15	37301900	193	203
Mudpit_Aged L3_4 Posterior NP IAF	Stem cell growth factor; lymphocyte secreted C-type lectin OS=Homo sapiens PE=2 SV=1	Q5U0B9,Q9Y240	CLEC11A	35694.4	6	7	17	LAGLDAGLHQLHVR	R	L	0.995	57.6	25	16.6	57.6	0	0	1	1	2	1499.84	9446.9	14035900	115	128
Mudpit_Aged L3_4 Posterior NP IAF	Stem cell growth factor; lymphocyte secreted C-type lectin OS=Homo sapiens PE=2 SV=1	Q5U0B9,Q9Y240	CLEC11A	35694.4	6	7	17	VSFFAWHR	R	S	0.956	36.1	26.9	15.3	36.1	0	0	1	0	2	1049.53	7293.36	4411010	259	266
Mudpit_Aged L3_4 Posterior NP IAF	Stem cell growth factor; lymphocyte secreted C-type lectin OS=Homo sapiens PE=2 SV=1	Q5U0B9,Q9Y240	CLEC11A	35694.4	6	7	17	VVELTQGLR	R	Q	0.997	50.6	27.3	16.2	50.6	0	4	0	0	2	1014.59	4684.41	56684100	136	144
Mudpit_Aged L3_4 Posterior NP IAF	Keratin, type II cytoskeletal 5 OS=Homo sapiens GN=KRT5 PE=1 SV=3	P13647	KRT5	62379.6	2	2	2	ISISTSGGSFR	R	N	0.997	44.8	26.1	15.8	44.8	0	1	0	0	2	1111.57	4127.77	6850170	74	84
Mudpit_Aged L3_4 Posterior NP IAF	Keratin, type II cytoskeletal 5 OS=Homo sapiens GN=KRT5 PE=1 SV=3	P13647	KRT5	62379.6	2	2	2	SFSTASAITPSVSR	R	T	0.997	58.3	26.5	16.6	58.3	0	1	0	0	2	1410.72	4657.77	3104610	16	29
Mudpit_Aged L3_4 Posterior NP IAF	Keratin, type I cytoskeletal 10 OS=Homo sapiens GN=KRT10 PE=1 SV=6	P13645	KRT10	58828.8	4	4	4	ALEESNYELEGK	R	I	0.997	80.9	33.4	18.1	80.9	0	1	0	0	2	1381.65	3589.47	6171860	166	177
Mudpit_Aged L3_4 Posterior NP IAF	Keratin, type I cytoskeletal 10 OS=Homo sapiens GN=KRT10 PE=1 SV=6	P13645	KRT10	58828.8	4	4	4	DAEAWFNEK	K	S	0.965	33.3	25	15.1	33.3	0	1	0	0	2	1109.49	5426.35	7118480	335	343
Mudpit_Aged L3_4 Posterior NP IAF	Keratin, type I cytoskeletal 10 OS=Homo sapiens GN=KRT10 PE=1 SV=6	P13645	KRT10	58828.8	4	4	4	GSLGGGFSSGGFSGGSFSR	K	G	0.997	103	25	19.5	103	0	1	0	0	2	1707.77	6139.77	13742000	41	59
Mudpit_Aged L3_4 Posterior NP IAF	Keratin, type I cytoskeletal 10 OS=Homo sapiens GN=KRT10 PE=1 SV=6	P13645	KRT10	58828.8	4	4	4	VTMQNLNDR	K	L	0.997	42.3	26.1	15.6	42.3	0	1	0	0	2	1090.53	2456.24	2447720	148	156
Mudpit_Aged L3_4 Posterior NP IAF	Laminin, beta 2 (Laminin S), isoform CRA_a OS=Homo sapiens GN=LAMB2 PE=4 SV=1	A0A024R319,P55268	LAMB2	195976	3	3	3	AQEAEQLLR	R	G	0.997	48	26	22.3	41.7	0	1	0	0	2	1057.56	3497.38	3238150	1695	1703
Mudpit_Aged L3_4 Posterior NP IAF	Laminin, beta 2 (Laminin S), isoform CRA_a OS=Homo sapiens GN=LAMB2 PE=4 SV=1	A0A024R319,P55268	LAMB2	195976	3	3	3	GPLGDQYQTVK	R	A	0.992	34.4	27.5	15.1	34.4	0	1	0	0	2	1205.62	3216.6	2886140	1704	1714
Mudpit_Aged L3_4 Posterior NP IAF	Laminin, beta 2 (Laminin S), isoform CRA_a OS=Homo sapiens GN=LAMB2 PE=4 SV=1	A0A024R319,P55268	LAMB2	195976	3	3	3	YSEIEPSTEGEVIYR	R	V	0.997	71.3	25	22.7	66.1	0	1	0	0	2	1771.84	5778.43	2781220	206	220
Mudpit_Aged L3_4 Posterior NP IAF	Lysyl oxidase homolog 3 OS=Homo sapiens GN=LOXL3 PE=2 SV=1	P58215	LOXL3	83164.5	4	4	4	ELGFTEATGWTHSAK	R	Y	0.979	37.9	25.6	15.4	37.9	0	0	1	0	2	1634.78	6001.99	24370600	85	99
Mudpit_Aged L3_4 Posterior NP IAF	Lysyl oxidase homolog 3 OS=Homo sapiens GN=LOXL3 PE=2 SV=1	P58215	LOXL3	83164.5	4	4	4	FSSQIHNLGR	R	A	0.975	48.4	27.4	16	48.4	0	0	1	0	2	1158.6	4147.25	7180340	580	589
Mudpit_Aged L3_4 Posterior NP IAF	Lysyl oxidase homolog 3 OS=Homo sapiens GN=LOXL3 PE=2 SV=1	P58215	LOXL3	83164.5	4	4	4	MGQGMGAIHLSEVR	R	C	0.976	48.2	36	16	48.2	0	0	1	0	2	1485.73	7839.56	4045030	362	375
Mudpit_Aged L3_4 Posterior NP IAF	Lysyl oxidase homolog 3 OS=Homo sapiens GN=LOXL3 PE=2 SV=1	P58215	LOXL3	83164.5	4	4	4	VEVQIGGPGPLR	R	W	0.997	50.9	25	16.2	50.9	0	1	0	0	2	1221.7	5266.09	14825900	430	441
Mudpit_Aged L3_4 Posterior NP IAF	cDNA, FLJ92374, highly similar to Homo sapiens C-type lectin domain family 3, member B (CLEC3B), mRNA OS=Homo sapiens PE=2 SV=1	B2R582		22537	4	6	15	GGTLSTPQTGSENDALYEYLR	R	Q	0.997	129	25.6	21	129	0	3	2	0	2	2272.07	7939.93	34827700	102	122
Mudpit_Aged L3_4 Posterior NP IAF	cDNA, FLJ92374, highly similar to Homo sapiens C-type lectin domain family 3, member B (CLEC3B), mRNA OS=Homo sapiens PE=2 SV=1	B2R582		22537	4	6	15	LDTLAQEVALLK	R	E	0.997	80.9	25	18.1	80.9	0	4	0	0	2	1313.77	8823.94	47275300	51	62
Mudpit_Aged L3_4 Posterior NP IAF	cDNA, FLJ92374, highly similar to Homo sapiens C-type lectin domain family 3, member B (CLEC3B), mRNA OS=Homo sapiens PE=2 SV=1	B2R582		22537	4	6	15	NWETEITAQPDGGK	K	T	0.997	54.1	25	16.4	54.1	0	4	1	0	2	1545.72	5626.52	28692800	156	169
Mudpit_Aged L3_4 Posterior NP IAF	cDNA, FLJ92374, highly similar to Homo sapiens C-type lectin domain family 3, member B (CLEC3B), mRNA OS=Homo sapiens PE=2 SV=1	B2R582		22537	4	6	15	TENCAVLSGAANGK	K	W	0.997	42	25	15.6	42	0	1	0	0	2	1392.64	2415.68	10111800	170	183
Mudpit_Aged L3_4 Posterior NP IAF	Putative uncharacterized protein DKFZp686C15213 OS=Homo sapiens GN=DKFZp686C15213 PE=2 SV=1	Q6MZU6	DKFZp686C15213	51097.5	3	7	64	GLPAPIEK	K	T	0.99	34.7	25	15.2	34.7	0	10	0	0	2	824.488	3262.58	236476000	344	351
Mudpit_Aged L3_4 Posterior NP IAF	Putative uncharacterized protein DKFZp686C15213 OS=Homo sapiens GN=DKFZp686C15213 PE=2 SV=1	Q6MZU6	DKFZp686C15213	51097.5	3	7	64	TTPPMLDSDGSFFLYSK	K	L	0.997	98.3	25.1	19.1	98.3	0	42	9	0	2	1905.89	8599.47	1114290000	410	426
Mudpit_Aged L3_4 Posterior NP IAF	Putative uncharacterized protein DKFZp686C15213 OS=Homo sapiens GN=DKFZp686C15213 PE=2 SV=1	Q6MZU6	DKFZp686C15213	51097.5	3	7	64	VVSVLTVVHQDWLNGK	R	E	0.997	93.5	25	18.8	93.5	0	2	1	0	2	1793.99	9078.79	443331000	319	334
Mudpit_Aged L3_4 Posterior NP IAF	DnaJ homolog subfamily B member 11 OS=Homo sapiens GN=DNAJB11 PE=1 SV=1	Q9UBS4	DNAJB11	40514.6	2	2	3	FQDLGAAYEVLSDSEK	K	R	0.997	101	25	19.3	101	0	1	0	0	2	1771.84	8293.7	6210010	67	82
Mudpit_Aged L3_4 Posterior NP IAF	DnaJ homolog subfamily B member 11 OS=Homo sapiens GN=DNAJB11 PE=1 SV=1	Q9UBS4	DNAJB11	40514.6	2	2	3	TLEVEIEPGVR	R	D	0.997	56	25	26.9	45.6	0	2	0	0	2	1241.67	5773.96	12083700	207	217
Mudpit_Aged L3_4 Posterior NP IAF	Cadherin-1 OS=Homo sapiens GN=CDH1 PE=1 SV=1	A0A087WU43,A0A087WX17,A0A087WXI5,A0A0E3XJU3,A0A0U2ZQU7,A5D8W4,B3GN61,D3XNU5,P12830,Q9UII7	CDH1	97457.6	3	3	7	DTANWLEINPDTGAISTR	R	A	0.997	53.5	27.1	16.3	53.5	0	1	0	0	2	1973.96	8242.63	3167160	528	545
Mudpit_Aged L3_4 Posterior NP IAF	Cadherin-1 OS=Homo sapiens GN=CDH1 PE=1 SV=1	A0A087WU43,A0A087WX17,A0A087WXI5,A0A0E3XJU3,A0A0U2ZQU7,A5D8W4,B3GN61,D3XNU5,P12830,Q9UII7	CDH1	97457.6	3	3	7	TAYFSLDTR	R	F	0.995	33.4	25	15.1	33.4	0	1	0	0	2	1073.53	5320.14	54269200	66	74
Mudpit_Aged L3_4 Posterior NP IAF	Cadherin-1 OS=Homo sapiens GN=CDH1 PE=1 SV=1	A0A087WU43,A0A087WX17,A0A087WXI5,A0A0E3XJU3,A0A0U2ZQU7,A5D8W4,B3GN61,D3XNU5,P12830,Q9UII7	CDH1	97457.6	3	3	7	VGTDGVITVK	K	R	0.997	72.6	27.8	26.1	64.1	0	5	0	0	2	988.567	3366.25	38732400	77	86
Mudpit_Aged L3_4 Posterior NP IAF	Cystatin OS=Homo sapiens GN=HEL-S-2 PE=2 SV=1	A0A0K0K1J1,P01034	CST3,HEL-S-2	15799.2	2	3	7	LVGGPMDASVEEEGVR	R	R	0.997	90.1	25.8	18.6	90.1	0	6	0	0	2	1644.79	4369.44	22141200	35	50
Mudpit_Aged L3_4 Posterior NP IAF	Cystatin OS=Homo sapiens GN=HEL-S-2 PE=2 SV=1	A0A0K0K1J1,P01034	CST3,HEL-S-2	15799.2	2	3	7	LVGGPMDASVEEEGVRR	R	A	0.997	36.7	26.6	15.3	36.7	0	1	0	0	2	1800.89	5424.69	1324240	35	51
Mudpit_Aged L3_4 Posterior NP IAF	Complement C5 OS=Homo sapiens GN=C5 PE=1 SV=4	P01031	C5	188309	35	58	164	ALLVGEHLNIIVTPK	K	S	0.997	79	25	17.9	79	0	1	1	0	2	1616.97	8776.06	27193400	475	489
Mudpit_Aged L3_4 Posterior NP IAF	Complement C5 OS=Homo sapiens GN=C5 PE=1 SV=4	P01031	C5	188309	35	58	164	ALVEGVDQLFTDYQIK	K	D	0.997	113	26	20	113	0	9	1	0	2	1838.95	8851.63	136126000	1441	1456
Mudpit_Aged L3_4 Posterior NP IAF	Complement C5 OS=Homo sapiens GN=C5 PE=1 SV=4	P01031	C5	188309	35	58	164	ATLLDIYK	K	T	0.99	54.5	25	39.8	31.1	0	5	0	0	2	936.54	6794.45	78354900	1579	1586
Mudpit_Aged L3_4 Posterior NP IAF	Complement C5 OS=Homo sapiens GN=C5 PE=1 SV=4	P01031	C5	188309	35	58	164	DINYVNPVIK	K	W	0.989	35.7	27.8	16.3	34.6	0	1	0	0	2	1174.65	5957.09	18498800	1263	1272
Mudpit_Aged L3_4 Posterior NP IAF	Complement C5 OS=Homo sapiens GN=C5 PE=1 SV=4	P01031	C5	188309	35	58	164	DSEITFIK	K	K	0.99	48.3	25	16	48.3	0	4	0	0	2	952.499	5438.4	52520200	1595	1602
Mudpit_Aged L3_4 Posterior NP IAF	Complement C5 OS=Homo sapiens GN=C5 PE=1 SV=4	P01031	C5	188309	35	58	164	DSLDQLVGGVPVTLNAQTIDVNQETSDLDPSK	K	S	0.997	97	26.3	19.1	97	0	0	3	0	2	3368.67	9159.22	54445200	377	408
Mudpit_Aged L3_4 Posterior NP IAF	Complement C5 OS=Homo sapiens GN=C5 PE=1 SV=4	P01031	C5	188309	35	58	164	DVFLEMNIPYSVVR	K	G	0.997	53.8	26.6	16.4	53.8	0	3	1	0	2	1697.86	8997.41	49406900	822	835
Mudpit_Aged L3_4 Posterior NP IAF	Complement C5 OS=Homo sapiens GN=C5 PE=1 SV=4	P01031	C5	188309	35	58	164	EDFSTTGTAYFEVK	K	E	0.997	71.7	25	17.5	71.7	0	4	0	0	2	1594.73	7140.03	31479100	207	220
Mudpit_Aged L3_4 Posterior NP IAF	Complement C5 OS=Homo sapiens GN=C5 PE=1 SV=4	P01031	C5	188309	35	58	164	EESSSGSSHAVMDISLPTGISANEEDLK	R	A	0.997	67.5	25	17.2	67.5	0	1	6	0	2	2890.33	7671.56	77719100	1413	1440
Mudpit_Aged L3_4 Posterior NP IAF	Complement C5 OS=Homo sapiens GN=C5 PE=1 SV=4	P01031	C5	188309	35	58	164	EGMLSIMSYR	K	N	0.997	76.5	25	24.6	69.7	0	6	0	0	2	1186.56	6194.78	46459900	1051	1060
Mudpit_Aged L3_4 Posterior NP IAF	Complement C5 OS=Homo sapiens GN=C5 PE=1 SV=4	P01031	C5	188309	35	58	164	ELSYYSLEDLNNK	K	Y	0.997	73.2	25.7	17.6	73.2	0	5	0	0	2	1587.75	6882.12	61789800	309	321
Mudpit_Aged L3_4 Posterior NP IAF	Complement C5 OS=Homo sapiens GN=C5 PE=1 SV=4	P01031	C5	188309	35	58	164	ESYSGVTLDPR	R	G	0.997	50.7	26	16.2	50.7	0	4	0	0	2	1223.59	4387.45	40100800	937	947
Mudpit_Aged L3_4 Posterior NP IAF	Complement C5 OS=Homo sapiens GN=C5 PE=1 SV=4	P01031	C5	188309	35	58	164	EYVLPHFSVSIEPEYNFIGYK	K	N	0.991	47.2	25.8	16	47.2	0	0	6	0	2	2531.25	9969.55	2710450	221	241
Mudpit_Aged L3_4 Posterior NP IAF	Complement C5 OS=Homo sapiens GN=C5 PE=1 SV=4	P01031	C5	188309	35	58	164	FQNSAILTIQPK	K	Q	0.997	69.9	25.2	17.4	69.9	0	5	0	0	2	1359.76	6182.25	58157200	79	90
Mudpit_Aged L3_4 Posterior NP IAF	Complement C5 OS=Homo sapiens GN=C5 PE=1 SV=4	P01031	C5	188309	35	58	164	FSDASYQSINIPVTQNMVPSSR	K	L	0.997	113	25.9	20.1	113	0	6	5	0	2	2441.18	8002.22	44108600	518	539
Mudpit_Aged L3_4 Posterior NP IAF	Complement C5 OS=Homo sapiens GN=C5 PE=1 SV=4	P01031	C5	188309	35	58	164	FSYSSGHVHLSSENK	K	F	0.954	26.4	25	14.6	26.4	0	0	0	1	2	1678.78	4667.93	27604100	64	78
Mudpit_Aged L3_4 Posterior NP IAF	Complement C5 OS=Homo sapiens GN=C5 PE=1 SV=4	P01031	C5	188309	35	58	164	GIYGTISR	R	R	0.99	38.9	25.1	15.4	38.9	0	2	0	0	2	866.473	3165.68	18439100	948	955
Mudpit_Aged L3_4 Posterior NP IAF	Complement C5 OS=Homo sapiens GN=C5 PE=1 SV=4	P01031	C5	188309	35	58	164	IDTQDIEASHYR	K	G	0.997	86.6	25.1	18.8	86.3	0	3	6	0	2	1447.68	4191.95	145676000	1381	1392
Mudpit_Aged L3_4 Posterior NP IAF	Complement C5 OS=Homo sapiens GN=C5 PE=1 SV=4	P01031	C5	188309	35	58	164	IPLDLVPK	R	T	0.99	37.8	25	15.4	37.8	0	10	0	0	2	894.566	6412.42	229763000	963	970
Mudpit_Aged L3_4 Posterior NP IAF	Complement C5 OS=Homo sapiens GN=C5 PE=1 SV=4	P01031	C5	188309	35	58	164	ITHYNYLILSK	K	G	0.997	44.1	25	15.8	44.1	0	2	5	0	2	1364.76	7921.2	58229900	496	506
Mudpit_Aged L3_4 Posterior NP IAF	Complement C5 OS=Homo sapiens GN=C5 PE=1 SV=4	P01031	C5	188309	35	58	164	LQGTLPVEAR	K	E	0.997	51.7	25	16.2	51.7	0	3	0	0	2	1083.62	3755.12	116391000	1129	1138
Mudpit_Aged L3_4 Posterior NP IAF	Complement C5 OS=Homo sapiens GN=C5 PE=1 SV=4	P01031	C5	188309	35	58	164	LSMDIDVSYK	R	H	0.997	65.6	25	17.1	65.6	0	8	0	0	2	1186.57	4473.05	90015200	1309	1318
Mudpit_Aged L3_4 Posterior NP IAF	Complement C5 OS=Homo sapiens GN=C5 PE=1 SV=4	P01031	C5	188309	35	58	164	MVETTAYALLTSLNLK	R	D	0.997	123	25.6	20.7	123	0	2	4	0	2	1767.96	9204.33	152427000	1247	1262
Mudpit_Aged L3_4 Posterior NP IAF	Complement C5 OS=Homo sapiens GN=C5 PE=1 SV=4	P01031	C5	188309	35	58	164	NADYSYSVWK	R	G	0.997	57.4	25	16.6	57.4	0	4	0	0	2	1232.56	5566.47	42522000	1061	1070
Mudpit_Aged L3_4 Posterior NP IAF	Complement C5 OS=Homo sapiens GN=C5 PE=1 SV=4	P01031	C5	188309	35	58	164	QLPGGQNPVSYVYLEVVSK	K	H	0.997	56.7	26.2	16.5	56.7	0	1	1	0	2	2077.1	9154.53	30967700	91	109
Mudpit_Aged L3_4 Posterior NP IAF	Complement C5 OS=Homo sapiens GN=C5 PE=1 SV=4	P01031	C5	188309	35	58	164	SYFPESWLWEVHLVPR	R	R	0.99	47.5	26.2	16	47.5	0	0	7	0	2	2045.03	9732.58	17246500	767	782
Mudpit_Aged L3_4 Posterior NP IAF	Complement C5 OS=Homo sapiens GN=C5 PE=1 SV=4	P01031	C5	188309	35	58	164	TDAPDLPEENQAR	K	E	0.997	73.5	25	17.6	73.5	0	4	1	0	2	1455.67	3359.27	170257000	437	449
Mudpit_Aged L3_4 Posterior NP IAF	Complement C5 OS=Homo sapiens GN=C5 PE=1 SV=4	P01031	C5	188309	35	58	164	TGEAVAEKDSEITFIK	K	K	0.997	81.7	26.8	18.1	81.7	0	1	3	0	2	1737.89	6130.26	26386000	1587	1602
Mudpit_Aged L3_4 Posterior NP IAF	Complement C5 OS=Homo sapiens GN=C5 PE=1 SV=4	P01031	C5	188309	35	58	164	TLLPVSKPEIR	K	S	0.997	45.2	25	15.8	45.2	0	1	5	0	2	1252.76	6888.78	47343700	756	766
Mudpit_Aged L3_4 Posterior NP IAF	Complement C5 OS=Homo sapiens GN=C5 PE=1 SV=4	P01031	C5	188309	35	58	164	VSITSITVENVFVK	K	Y	0.997	80.6	25	20.1	78.5	0	1	0	0	2	1535.87	9008.39	17981100	1563	1576
Mudpit_Aged L3_4 Posterior NP IAF	Complement C5 OS=Homo sapiens GN=C5 PE=1 SV=4	P01031	C5	188309	35	58	164	VTCTNAELVK	K	G	0.997	47.7	26.3	24.8	38.9	0	2	0	0	2	1135.57	2511.21	6226770	1604	1613
Mudpit_Aged L3_4 Posterior NP IAF	Complement C5 OS=Homo sapiens GN=C5 PE=1 SV=4	P01031	C5	188309	35	58	164	VVTEADVYITFGIR	K	E	0.997	39.4	26.2	15.5	39.4	0	1	0	0	2	1582.85	9859.48	311227	259	272
Mudpit_Aged L3_4 Posterior NP IAF	Complement C5 OS=Homo sapiens GN=C5 PE=1 SV=4	P01031	C5	188309	35	58	164	VYSLNDDLKPAK	R	R	0.997	56.9	27	16.6	56.9	0	2	1	0	2	1362.73	3967.67	41926500	145	156
Mudpit_Aged L3_4 Posterior NP IAF	Complement C5 OS=Homo sapiens GN=C5 PE=1 SV=4	P01031	C5	188309	35	58	164	YGGGFYSTQDTINAIEGLTEYSLLVK	R	Q	0.997	114	25.8	20.1	114	0	1	1	0	2	2839.4	9527.06	9007920	1280	1305
Mudpit_Aged L3_4 Posterior NP IAF	Complement C5 OS=Homo sapiens GN=C5 PE=1 SV=4	P01031	C5	188309	35	58	164	YIYPLDSLTWIEYWPR	R	D	0.997	87.9	27.3	18.5	87.9	0	3	1	0	2	2115.06	9438.93	25540800	1635	1650
Mudpit_Aged L3_4 Posterior NP IAF	Protein S isoform 1 (Fragment) OS=Homo sapiens GN=PROS1 PE=2 SV=1	A0A0S2Z4K3,A0A0S2Z4L3,P07225,Q16519,Q9NSD0	PROS1	75123.4	7	8	10	FSAEFDFR	R	T	0.99	39.8	25	15.5	39.8	0	1	0	0	2	1018.46	6270.08	22541500	323	330
Mudpit_Aged L3_4 Posterior NP IAF	Protein S isoform 1 (Fragment) OS=Homo sapiens GN=PROS1 PE=2 SV=1	A0A0S2Z4K3,A0A0S2Z4L3,P07225,Q16519,Q9NSD0	PROS1	75123.4	7	8	10	IETISHEDLQR	K	Q	0.997	48.4	28.1	16	48.4	0	1	1	0	2	1340.68	3356.65	7521650	592	602
Mudpit_Aged L3_4 Posterior NP IAF	Protein S isoform 1 (Fragment) OS=Homo sapiens GN=PROS1 PE=2 SV=1	A0A0S2Z4K3,A0A0S2Z4L3,P07225,Q16519,Q9NSD0	PROS1	75123.4	7	8	10	NNLELSTPLK	R	I	0.997	47.2	26.9	15.9	47.2	0	2	0	0	2	1128.63	4916.26	30064600	582	591
Mudpit_Aged L3_4 Posterior NP IAF	Protein S isoform 1 (Fragment) OS=Homo sapiens GN=PROS1 PE=2 SV=1	A0A0S2Z4K3,A0A0S2Z4L3,P07225,Q16519,Q9NSD0	PROS1	75123.4	7	8	10	QSTNAYPDLR	R	S	0.997	63.4	25.8	24	56.4	0	1	0	0	2	1164.56	2919.7	8960890	102	111
Mudpit_Aged L3_4 Posterior NP IAF	Protein S isoform 1 (Fragment) OS=Homo sapiens GN=PROS1 PE=2 SV=1	A0A0S2Z4K3,A0A0S2Z4L3,P07225,Q16519,Q9NSD0	PROS1	75123.4	7	8	10	SFQTGLFTAAR	R	Q	0.997	37.6	25.1	15.3	37.6	0	1	0	0	2	1198.62	6350.73	4923690	91	101
Mudpit_Aged L3_4 Posterior NP IAF	Protein S isoform 1 (Fragment) OS=Homo sapiens GN=PROS1 PE=2 SV=1	A0A0S2Z4K3,A0A0S2Z4L3,P07225,Q16519,Q9NSD0	PROS1	75123.4	7	8	10	SQDILLSVENTVIYR	K	I	0.997	83.4	26.2	18.2	83.4	0	2	0	0	2	1749.94	9067.48	41040500	547	561
Mudpit_Aged L3_4 Posterior NP IAF	Protein S isoform 1 (Fragment) OS=Homo sapiens GN=PROS1 PE=2 SV=1	A0A0S2Z4K3,A0A0S2Z4L3,P07225,Q16519,Q9NSD0	PROS1	75123.4	7	8	10	VESELIKPINPR	K	L	0.997	45.4	25	15.8	45.4	0	1	0	0	2	1394.8	4744.61	5686200	434	445
Mudpit_Aged L3_4 Posterior NP IAF	Alpha-2-macroglobulin OS=Homo sapiens GN=A2M PE=1 SV=3	P01023	A2M	163290	40	69	260	AAQVTIQSSGTFSSK	K	F	0.997	96.5	26.4	19	96.5	0	7	0	0	2	1511.77	3875.37	34927800	1275	1289
Mudpit_Aged L3_4 Posterior NP IAF	Alpha-2-macroglobulin OS=Homo sapiens GN=A2M PE=1 SV=3	P01023	A2M	163290	40	69	260	AFQPFFVELTMPYSVIR	R	G	0.997	46.6	27.2	15.9	46.6	0	2	1	0	2	2061.05	9452.27	20615100	788	804
Mudpit_Aged L3_4 Posterior NP IAF	Alpha-2-macroglobulin OS=Homo sapiens GN=A2M PE=1 SV=3	P01023	A2M	163290	40	69	260	AGAFCLSEDAGLGISSTASLR	K	A	0.997	88.1	25.3	18.5	88.1	0	1	0	0	2	2084	9592.26	1772250	767	787
Mudpit_Aged L3_4 Posterior NP IAF	Alpha-2-macroglobulin OS=Homo sapiens GN=A2M PE=1 SV=3	P01023	A2M	163290	40	69	260	AIGYLNTGYQR	K	Q	0.997	55.3	26	16.5	55.3	0	2	0	0	2	1255.64	4646.85	22700000	1004	1014
Mudpit_Aged L3_4 Posterior NP IAF	Alpha-2-macroglobulin OS=Homo sapiens GN=A2M PE=1 SV=3	P01023	A2M	163290	40	69	260	ALLAYAFALAGNQDK	K	R	0.997	84.6	26.2	18.3	84.6	0	1	1	0	2	1565.83	9000.6	48597100	1148	1162
Mudpit_Aged L3_4 Posterior NP IAF	Alpha-2-macroglobulin OS=Homo sapiens GN=A2M PE=1 SV=3	P01023	A2M	163290	40	69	260	ATVLNYLPK	K	C	0.997	53	25	38.9	30.3	0	7	0	0	2	1018.59	6586.67	190261000	812	820
Mudpit_Aged L3_4 Posterior NP IAF	Alpha-2-macroglobulin OS=Homo sapiens GN=A2M PE=1 SV=3	P01023	A2M	163290	40	69	260	AVDQSVLLMKPDAELSASSVYNLLPEK	R	D	0.997	82.5	25	18.2	82.5	0	0	3	0	2	2933.52	9207.44	21713100	599	625
Mudpit_Aged L3_4 Posterior NP IAF	Alpha-2-macroglobulin OS=Homo sapiens GN=A2M PE=1 SV=3	P01023	A2M	163290	40	69	260	DLTGFPGPLNDQDNEDCINR	K	H	0.997	71.4	25	17.5	71.4	0	7	2	0	2	2290.99	7811.91	32732400	626	645
Mudpit_Aged L3_4 Posterior NP IAF	Alpha-2-macroglobulin OS=Homo sapiens GN=A2M PE=1 SV=3	P01023	A2M	163290	40	69	260	DMYSFLEDMGLK	K	A	0.997	67.1	25	17.2	67.1	0	10	0	0	2	1464.64	9072.27	317218000	665	676
Mudpit_Aged L3_4 Posterior NP IAF	Alpha-2-macroglobulin OS=Homo sapiens GN=A2M PE=1 SV=3	P01023	A2M	163290	40	69	260	DTVIKPLLVEPEGLEK	K	E	0.997	82.9	25	18.2	82.9	0	8	11	0	2	1780.01	8657.77	519950000	897	912
Mudpit_Aged L3_4 Posterior NP IAF	Alpha-2-macroglobulin OS=Homo sapiens GN=A2M PE=1 SV=3	P01023	A2M	163290	40	69	260	ETTFNSLLCPSGGEVSEELSLK	K	L	0.997	83.6	25.6	18.2	83.6	0	3	2	0	2	2398.13	8962.45	54301300	913	934
Mudpit_Aged L3_4 Posterior NP IAF	Alpha-2-macroglobulin OS=Homo sapiens GN=A2M PE=1 SV=3	P01023	A2M	163290	40	69	260	FEVQVTVPK	K	I	0.997	51.4	27.8	16.2	51.4	0	4	0	0	2	1046.59	5546.92	47298500	229	237
Mudpit_Aged L3_4 Posterior NP IAF	Alpha-2-macroglobulin OS=Homo sapiens GN=A2M PE=1 SV=3	P01023	A2M	163290	40	69	260	FSGQLNSHGCFYQQVK	K	T	0.997	64.1	25	17	64.1	0	2	1	0	2	1900.86	6798.6	9773770	290	305
Mudpit_Aged L3_4 Posterior NP IAF	Alpha-2-macroglobulin OS=Homo sapiens GN=A2M PE=1 SV=3	P01023	A2M	163290	40	69	260	GHFSISIPVK	K	S	0.997	51.5	25	16.2	51.5	0	2	3	0	2	1084.62	8030.71	28367700	522	531
Mudpit_Aged L3_4 Posterior NP IAF	Alpha-2-macroglobulin OS=Homo sapiens GN=A2M PE=1 SV=3	P01023	A2M	163290	40	69	260	HYDGSYSTFGER	K	Y	0.997	74.8	25	17.7	74.8	0	3	2	0	2	1418.6	3801.46	190040000	1020	1031
Mudpit_Aged L3_4 Posterior NP IAF	Alpha-2-macroglobulin OS=Homo sapiens GN=A2M PE=1 SV=3	P01023	A2M	163290	40	69	260	IAQWQSFQLEGGLK	R	Q	0.997	88.1	32.7	18.5	88.1	0	5	0	0	2	1604.84	8144.03	84956100	175	188
Mudpit_Aged L3_4 Posterior NP IAF	Alpha-2-macroglobulin OS=Homo sapiens GN=A2M PE=1 SV=3	P01023	A2M	163290	40	69	260	LHTEAQIQEEGTVVELTGR	K	Q	0.997	129	25.7	21.1	129	0	10	26	0	2	2110.08	7736.25	203523000	320	338
Mudpit_Aged L3_4 Posterior NP IAF	Alpha-2-macroglobulin OS=Homo sapiens GN=A2M PE=1 SV=3	P01023	A2M	163290	40	69	260	LLIYAVLPTGDVIGDSAK	R	Y	0.997	75.2	25	17.7	75.2	0	3	1	0	2	1845.04	9140	194804000	540	557
Mudpit_Aged L3_4 Posterior NP IAF	Alpha-2-macroglobulin OS=Homo sapiens GN=A2M PE=1 SV=3	P01023	A2M	163290	40	69	260	LLLQQVSLPELPGEYSMK	R	V	0.997	64.4	25.8	17	64.4	0	5	2	0	2	2045.1	9085.08	206705000	1298	1315
Mudpit_Aged L3_4 Posterior NP IAF	Alpha-2-macroglobulin OS=Homo sapiens GN=A2M PE=1 SV=3	P01023	A2M	163290	40	69	260	LPPNVVEESAR	K	A	0.997	59.6	28.5	16.7	59.6	0	10	0	0	2	1210.64	3672.01	789061000	935	945
Mudpit_Aged L3_4 Posterior NP IAF	Alpha-2-macroglobulin OS=Homo sapiens GN=A2M PE=1 SV=3	P01023	A2M	163290	40	69	260	LVHVEEPHTETVR	R	K	0.997	57.8	26.8	16.6	57.8	0	2	1	4	2	1545.8	5375.71	547072000	720	732
Mudpit_Aged L3_4 Posterior NP IAF	Alpha-2-macroglobulin OS=Homo sapiens GN=A2M PE=1 SV=3	P01023	A2M	163290	40	69	260	NEDSLVFVQTDK	K	S	0.997	70.7	26.2	27.5	60.6	0	3	0	0	2	1394.68	5582.18	102981000	124	135
Mudpit_Aged L3_4 Posterior NP IAF	Alpha-2-macroglobulin OS=Homo sapiens GN=A2M PE=1 SV=3	P01023	A2M	163290	40	69	260	QFSFPLSSEPFQGSYK	K	V	0.997	81.8	25.5	18.1	81.8	0	2	1	0	2	1848.88	8918.71	56755500	189	204
Mudpit_Aged L3_4 Posterior NP IAF	Alpha-2-macroglobulin OS=Homo sapiens GN=A2M PE=1 SV=3	P01023	A2M	163290	40	69	260	QGIPFFGQVR	R	L	0.997	41.7	26.4	21.1	36.2	0	3	0	0	2	1148.62	8115.41	64705800	361	370
Mudpit_Aged L3_4 Posterior NP IAF	Alpha-2-macroglobulin OS=Homo sapiens GN=A2M PE=1 SV=3	P01023	A2M	163290	40	69	260	QQNAQGGFSSTQDTVVALHALSK	K	Y	0.997	102	26.7	19.4	102	0	0	4	0	2	2387.2	8125.65	54738900	1241	1263
Mudpit_Aged L3_4 Posterior NP IAF	Alpha-2-macroglobulin OS=Homo sapiens GN=A2M PE=1 SV=3	P01023	A2M	163290	40	69	260	QTVSWAVTPK	R	S	0.997	69.9	27.2	17.4	69.9	0	5	0	0	2	1116.6	4665.35	103091000	854	863
Mudpit_Aged L3_4 Posterior NP IAF	Alpha-2-macroglobulin OS=Homo sapiens GN=A2M PE=1 SV=3	P01023	A2M	163290	40	69	260	SASNMAIVDVK	R	M	0.997	77.3	26	19.8	75.4	0	9	0	0	2	1150.58	2725.52	184072000	1374	1384
Mudpit_Aged L3_4 Posterior NP IAF	Alpha-2-macroglobulin OS=Homo sapiens GN=A2M PE=1 SV=3	P01023	A2M	163290	40	69	260	SDIAPVAR	K	L	0.99	35	25	15.2	35	0	1	0	0	2	828.457	1990.24	1922960	532	539
Mudpit_Aged L3_4 Posterior NP IAF	Alpha-2-macroglobulin OS=Homo sapiens GN=A2M PE=1 SV=3	P01023	A2M	163290	40	69	260	SLFTDLEAENDVLHCVAFAVPK	R	S	0.945	35	26.1	15.2	35	0	0	1	0	2	2476.21	9551.63	3730410	72	93
Mudpit_Aged L3_4 Posterior NP IAF	Alpha-2-macroglobulin OS=Homo sapiens GN=A2M PE=1 SV=3	P01023	A2M	163290	40	69	260	SSGSLLNNAIK	R	G	0.997	61.5	28.1	16.8	61.5	0	5	0	0	2	1103.61	4290.45	74633800	1082	1092
Mudpit_Aged L3_4 Posterior NP IAF	Alpha-2-macroglobulin OS=Homo sapiens GN=A2M PE=1 SV=3	P01023	A2M	163290	40	69	260	SSSNEEVMFLTVQVK	K	G	0.997	122	25.6	20.6	122	0	7	1	0	2	1713.84	6842.93	140362000	94	108
Mudpit_Aged L3_4 Posterior NP IAF	Alpha-2-macroglobulin OS=Homo sapiens GN=A2M PE=1 SV=3	P01023	A2M	163290	40	69	260	TEHPFTVEEFVLPK	R	F	0.997	58.4	27.6	16.6	58.4	0	7	8	0	2	1672.86	9263.45	525660000	215	228
Mudpit_Aged L3_4 Posterior NP IAF	Alpha-2-macroglobulin OS=Homo sapiens GN=A2M PE=1 SV=3	P01023	A2M	163290	40	69	260	TEVSSNHVLIYLDK	R	V	0.997	102	27.7	19.4	102	0	3	6	0	2	1617.85	6851.19	164228000	1408	1421
Mudpit_Aged L3_4 Posterior NP IAF	Alpha-2-macroglobulin OS=Homo sapiens GN=A2M PE=1 SV=3	P01023	A2M	163290	40	69	260	TGTHGLLVK	R	Q	0.997	52.6	25	22.2	46.7	0	1	0	0	2	925.547	5266.1	6125580	508	516
Mudpit_Aged L3_4 Posterior NP IAF	Alpha-2-macroglobulin OS=Homo sapiens GN=A2M PE=1 SV=3	P01023	A2M	163290	40	69	260	VDLSFSPSQSLPASHAHLR	K	V	0.996	67.8	26.6	17.2	67.8	0	0	3	3	2	2049.05	9135.32	125625000	568	586
Mudpit_Aged L3_4 Posterior NP IAF	Alpha-2-macroglobulin OS=Homo sapiens GN=A2M PE=1 SV=3	P01023	A2M	163290	40	69	260	VGFYESDVMGR	R	G	0.997	76.3	25	25.8	68.3	0	15	0	0	2	1259.57	4855.29	315343000	705	715
Mudpit_Aged L3_4 Posterior NP IAF	Alpha-2-macroglobulin OS=Homo sapiens GN=A2M PE=1 SV=3	P01023	A2M	163290	40	69	260	VSVQLEASPAFLAVPVEK	R	E	0.997	79.8	25	18	79.8	0	5	3	0	2	1884.05	8969.1	140822000	824	841
Mudpit_Aged L3_4 Posterior NP IAF	Alpha-2-macroglobulin OS=Homo sapiens GN=A2M PE=1 SV=3	P01023	A2M	163290	40	69	260	VVSMDENFHPLNELIPLVYIQDPK	R	G	0.997	39.2	26.1	15.5	39.2	0	1	5	0	2	2810.44	9881.39	18636400	148	171
Mudpit_Aged L3_4 Posterior NP IAF	Alpha-2-macroglobulin OS=Homo sapiens GN=A2M PE=1 SV=3	P01023	A2M	163290	40	69	260	YDVENCLANK	K	V	0.996	39.5	25	21.8	33.2	0	2	0	0	2	1226.54	3636.48	12239800	558	567
Mudpit_Aged L3_4 Posterior NP IAF	Alpha-2-macroglobulin OS=Homo sapiens GN=A2M PE=1 SV=3	P01023	A2M	163290	40	69	260	YGAATFTR	K	T	0.99	52.5	25	31.5	37.4	0	2	0	0	2	886.442	2722.27	64268400	1264	1271
Mudpit_Aged L3_4 Posterior NP IAF	Chitinase domain-containing protein 1 OS=Homo sapiens GN=CHID1 PE=1 SV=1	Q9BWS9	CHID1	44940.9	2	2	2	LLFEDWTYDDFR	R	N	0.997	57.4	25	16.6	57.4	0	1	0	0	2	1619.74	9247.47	4766900	150	161
Mudpit_Aged L3_4 Posterior NP IAF	Chitinase domain-containing protein 1 OS=Homo sapiens GN=CHID1 PE=1 SV=1	Q9BWS9	CHID1	44940.9	2	2	2	NVLDSEDEIEELSK	R	T	0.997	53.3	26.2	16.3	53.3	0	1	0	0	2	1619.76	6734.37	3477400	162	175
Mudpit_Aged L3_4 Posterior NP IAF	Dickkopf-related protein 3 OS=Homo sapiens GN=DKK3 PE=1 SV=1	F6SYF8,Q9UBP4	DKK3	38389.4	3	3	4	DQDGEILLPR	R	E	0.997	47.4	25.6	23	40.4	0	2	0	0	2	1155.6	6006.69	16049200	293	302
Mudpit_Aged L3_4 Posterior NP IAF	Dickkopf-related protein 3 OS=Homo sapiens GN=DKK3 PE=1 SV=1	F6SYF8,Q9UBP4	DKK3	38389.4	3	3	4	QELEDLER	R	S	0.99	39.2	25	39	15.6	0	1	0	0	2	1031.5	3611.42	7797650	319	326
Mudpit_Aged L3_4 Posterior NP IAF	Dickkopf-related protein 3 OS=Homo sapiens GN=DKK3 PE=1 SV=1	F6SYF8,Q9UBP4	DKK3	38389.4	3	3	4	SAVEEMEAEEAAAK	R	A	0.997	77.8	25	17.9	77.8	0	1	0	0	2	1464.65	5033.05	11975700	67	80
Mudpit_Aged L3_4 Posterior NP IAF	Epididymis secretory sperm binding protein Li 44a OS=Homo sapiens GN=SERPINA1 PE=2 SV=1	E9KL23,P01009	SERPINA1	46737.9	19	32	540	AVLTIDEK	K	G	0.99	61.5	27.5	18.3	60.1	0	12	0	0	2	888.504	3504.7	2561780000	360	367
Mudpit_Aged L3_4 Posterior NP IAF	Epididymis secretory sperm binding protein Li 44a OS=Homo sapiens GN=SERPINA1 PE=2 SV=1	E9KL23,P01009	SERPINA1	46737.9	19	32	540	DTEEEDFHVDQVTTVK	K	V	0.997	131	25	21.2	131	0	75	45	0	2	1891.86	6190.28	3574970000	226	241
Mudpit_Aged L3_4 Posterior NP IAF	Epididymis secretory sperm binding protein Li 44a OS=Homo sapiens GN=SERPINA1 PE=2 SV=1	E9KL23,P01009	SERPINA1	46737.9	19	32	540	DTVFALVNYIFFK	R	G	0.997	61.4	27	16.8	61.4	0	8	0	0	2	1576.84	9882.15	4287330	203	215
Mudpit_Aged L3_4 Posterior NP IAF	Epididymis secretory sperm binding protein Li 44a OS=Homo sapiens GN=SERPINA1 PE=2 SV=1	E9KL23,P01009	SERPINA1	46737.9	19	32	540	GTEAAGAMFLEAIPMSIPPEVK	K	F	0.997	103	29	19.4	103	0	20	8	0	2	2259.14	9252.31	994007000	368	389
Mudpit_Aged L3_4 Posterior NP IAF	Epididymis secretory sperm binding protein Li 44a OS=Homo sapiens GN=SERPINA1 PE=2 SV=1	E9KL23,P01009	SERPINA1	46737.9	19	32	540	ITPNLAEFAFSLYR	K	Q	0.997	67.2	26.7	27.1	57.3	0	1	0	0	2	1641.86	9282.3	72211600	50	63
Mudpit_Aged L3_4 Posterior NP IAF	Epididymis secretory sperm binding protein Li 44a OS=Homo sapiens GN=SERPINA1 PE=2 SV=1	E9KL23,P01009	SERPINA1	46737.9	19	32	540	KQINDYVEK	K	G	0.993	40.5	30.2	19.1	36.9	0	1	0	0	2	1136.59	3699.62	1982030	179	187
Mudpit_Aged L3_4 Posterior NP IAF	Epididymis secretory sperm binding protein Li 44a OS=Homo sapiens GN=SERPINA1 PE=2 SV=1	E9KL23,P01009	SERPINA1	46737.9	19	32	540	LQHLENELTHDIITK	K	F	0.997	83.8	26	18.2	83.8	0	14	30	24	2	1803.96	9054.06	5791430000	284	298
Mudpit_Aged L3_4 Posterior NP IAF	Epididymis secretory sperm binding protein Li 44a OS=Homo sapiens GN=SERPINA1 PE=2 SV=1	E9KL23,P01009	SERPINA1	46737.9	19	32	540	LSITGTYDLK	K	S	0.997	68.6	25.8	18.6	67.3	0	25	0	0	2	1110.6	5836.91	2261040000	315	324
Mudpit_Aged L3_4 Posterior NP IAF	Epididymis secretory sperm binding protein Li 44a OS=Homo sapiens GN=SERPINA1 PE=2 SV=1	E9KL23,P01009	SERPINA1	46737.9	19	32	540	LSSWVLLMK	K	Y	0.997	70.9	25	17.4	70.9	0	7	0	0	2	1076.62	8270.46	338749000	259	267
Mudpit_Aged L3_4 Posterior NP IAF	Epididymis secretory sperm binding protein Li 44a OS=Homo sapiens GN=SERPINA1 PE=2 SV=1	E9KL23,P01009	SERPINA1	46737.9	19	32	540	LYHSEAFTVNFGDTEEAK	K	K	0.997	117	25	20.3	117	0	60	86	0	2	2057.95	8124.93	3794930000	161	178
Mudpit_Aged L3_4 Posterior NP IAF	Epididymis secretory sperm binding protein Li 44a OS=Homo sapiens GN=SERPINA1 PE=2 SV=1	E9KL23,P01009	SERPINA1	46737.9	19	32	540	LYHSEAFTVNFGDTEEAKK	K	Q	0.997	101	25.5	19.3	101	0	2	4	5	2	2186.04	7370.44	187972000	161	179
Mudpit_Aged L3_4 Posterior NP IAF	Epididymis secretory sperm binding protein Li 44a OS=Homo sapiens GN=SERPINA1 PE=2 SV=1	E9KL23,P01009	SERPINA1	46737.9	19	32	540	QINDYVEK	K	G	0.99	50.4	26.7	22.6	43.9	0	7	0	0	2	1008.5	2376.23	150214000	180	187
Mudpit_Aged L3_4 Posterior NP IAF	Epididymis secretory sperm binding protein Li 44a OS=Homo sapiens GN=SERPINA1 PE=2 SV=1	E9KL23,P01009	SERPINA1	46737.9	19	32	540	SASLHLPK	R	L	0.99	54.5	25	16.4	54.5	0	6	0	0	2	852.494	5844.81	118854000	307	314
Mudpit_Aged L3_4 Posterior NP IAF	Epididymis secretory sperm binding protein Li 44a OS=Homo sapiens GN=SERPINA1 PE=2 SV=1	E9KL23,P01009	SERPINA1	46737.9	19	32	540	SVLGQLGITK	K	V	0.997	85.5	26.1	18.5	85.3	0	8	0	0	2	1015.61	6604.9	1053110000	325	334
Mudpit_Aged L3_4 Posterior NP IAF	Epididymis secretory sperm binding protein Li 44a OS=Homo sapiens GN=SERPINA1 PE=2 SV=1	E9KL23,P01009	SERPINA1	46737.9	19	32	540	TLNQPDSQLQLTTGNGLFLSEGLK	R	L	0.997	118	25.8	20.4	118	0	23	40	0	2	2574.34	9759.27	394681000	126	149
Mudpit_Aged L3_4 Posterior NP IAF	Epididymis secretory sperm binding protein Li 44a OS=Homo sapiens GN=SERPINA1 PE=2 SV=1	E9KL23,P01009	SERPINA1	46737.9	19	32	540	VFSNGADLSGVTEEAPLK	K	L	0.997	132	27.1	21.3	132	0	18	5	0	2	1833.92	6597.19	537201000	335	352
Mudpit_Aged L3_4 Posterior NP IAF	Epididymis secretory sperm binding protein Li 44a OS=Homo sapiens GN=SERPINA1 PE=2 SV=1	E9KL23,P01009	SERPINA1	46737.9	19	32	540	WERPFEVK	K	D	0.989	33.1	27.1	23.6	24.5	0	3	0	0	2	1090.57	4987.01	227763000	218	225
Mudpit_Aged L3_4 Posterior NP IAF	Epididymis secretory sperm binding protein Li 44a OS=Homo sapiens GN=SERPINA1 PE=2 SV=1	E9KL23,P01009	SERPINA1	46737.9	19	32	540	WERPFEVKDTEEEDFHVDQVTTVK	K	V	0.952	39.3	25	15.5	39.3	0	0	0	1	2	2963.41	8141.19	7949140	218	241
Mudpit_Aged L3_4 Posterior NP IAF	Epididymis secretory sperm binding protein Li 44a OS=Homo sapiens GN=SERPINA1 PE=2 SV=1	E9KL23,P01009	SERPINA1	46737.9	19	32	540	YLGNATAIFFLPDEGK	K	L	0.997	99.3	37.4	19.2	99.3	0	2	0	0	2	1755.9	9176.23	27169300	268	283
Mudpit_Aged L3_4 Posterior NP IAF	Serpin peptidase inhibitor, clade C (Antithrombin), member 1, isoform CRA_a OS=Homo sapiens GN=SERPINC1 PE=3 SV=1	A0A024R944,P01008	SERPINC1	52604.1	15	28	114	AFLEVNEEGSEAAASTAVVIAGR	K	S	0.997	169	27.4	23.5	169	0	17	11	0	2	2291.15	8282.84	179997000	403	425
Mudpit_Aged L3_4 Posterior NP IAF	Serpin peptidase inhibitor, clade C (Antithrombin), member 1, isoform CRA_a OS=Homo sapiens GN=SERPINC1 PE=3 SV=1	A0A024R944,P01008	SERPINC1	52604.1	15	28	114	ATEDEGSEQKIPEATNR	K	R	0.992	56	26.6	16.5	56	0	0	2	0	2	1874.87	2268.28	58470700	62	78
Mudpit_Aged L3_4 Posterior NP IAF	Serpin peptidase inhibitor, clade C (Antithrombin), member 1, isoform CRA_a OS=Homo sapiens GN=SERPINC1 PE=3 SV=1	A0A024R944,P01008	SERPINC1	52604.1	15	28	114	DDLYVSDAFHK	R	A	0.997	58.8	25.6	16.7	58.8	0	4	4	0	2	1309.61	5549.21	139864000	392	402
Mudpit_Aged L3_4 Posterior NP IAF	Serpin peptidase inhibitor, clade C (Antithrombin), member 1, isoform CRA_a OS=Homo sapiens GN=SERPINC1 PE=3 SV=1	A0A024R944,P01008	SERPINC1	52604.1	15	28	114	EQLQDMGLVDLFSPEK	K	S	0.997	102	26.4	19.4	102	0	11	4	0	2	1864.9	9076.58	417665000	365	380
Mudpit_Aged L3_4 Posterior NP IAF	Serpin peptidase inhibitor, clade C (Antithrombin), member 1, isoform CRA_a OS=Homo sapiens GN=SERPINC1 PE=3 SV=1	A0A024R944,P01008	SERPINC1	52604.1	15	28	114	EVPLNTIIFMGR	R	V	0.997	61.3	27.7	16.8	61.3	0	4	0	0	2	1389.76	9011.87	236113000	446	457
Mudpit_Aged L3_4 Posterior NP IAF	Serpin peptidase inhibitor, clade C (Antithrombin), member 1, isoform CRA_a OS=Homo sapiens GN=SERPINC1 PE=3 SV=1	A0A024R944,P01008	SERPINC1	52604.1	15	28	114	FATTFYQHLADSK	R	N	0.997	88.2	26.8	18.5	88.2	0	9	9	0	2	1528.74	6780.2	382937000	90	102
Mudpit_Aged L3_4 Posterior NP IAF	Serpin peptidase inhibitor, clade C (Antithrombin), member 1, isoform CRA_a OS=Homo sapiens GN=SERPINC1 PE=3 SV=1	A0A024R944,P01008	SERPINC1	52604.1	15	28	114	FRIEDGFSLK	R	E	0.993	53.7	25	16.4	53.7	0	0	2	0	2	1211.64	8223.38	15959000	355	364
Mudpit_Aged L3_4 Posterior NP IAF	Serpin peptidase inhibitor, clade C (Antithrombin), member 1, isoform CRA_a OS=Homo sapiens GN=SERPINC1 PE=3 SV=1	A0A024R944,P01008	SERPINC1	52604.1	15	28	114	GDDITMVLILPKPEK	K	S	0.997	73.9	25	17.6	73.9	0	2	4	0	2	1668.92	9182.24	64772400	308	322
Mudpit_Aged L3_4 Posterior NP IAF	Serpin peptidase inhibitor, clade C (Antithrombin), member 1, isoform CRA_a OS=Homo sapiens GN=SERPINC1 PE=3 SV=1	A0A024R944,P01008	SERPINC1	52604.1	15	28	114	IEDGFSLK	R	E	0.99	42.5	25.3	22.7	35.5	0	4	0	0	2	908.472	4730.93	61221400	357	364
Mudpit_Aged L3_4 Posterior NP IAF	Serpin peptidase inhibitor, clade C (Antithrombin), member 1, isoform CRA_a OS=Homo sapiens GN=SERPINC1 PE=3 SV=1	A0A024R944,P01008	SERPINC1	52604.1	15	28	114	KATEDEGSEQKIPEATNR	K	R	0.991	57.2	26.7	16.6	57.2	0	0	0	1	2	2002.97	4495.05	10619000	61	78
Mudpit_Aged L3_4 Posterior NP IAF	Serpin peptidase inhibitor, clade C (Antithrombin), member 1, isoform CRA_a OS=Homo sapiens GN=SERPINC1 PE=3 SV=1	A0A024R944,P01008	SERPINC1	52604.1	15	28	114	LPGIVAEGR	K	D	0.997	44.2	25	21	39	0	6	0	0	2	911.531	3940.4	98457400	383	391
Mudpit_Aged L3_4 Posterior NP IAF	Serpin peptidase inhibitor, clade C (Antithrombin), member 1, isoform CRA_a OS=Homo sapiens GN=SERPINC1 PE=3 SV=1	A0A024R944,P01008	SERPINC1	52604.1	15	28	114	NDNDNIFLSPLSISTAFAMTK	K	L	0.997	134	27.3	21.4	134	0	3	2	0	2	2299.13	9425.26	120047000	103	123
Mudpit_Aged L3_4 Posterior NP IAF	Serpin peptidase inhibitor, clade C (Antithrombin), member 1, isoform CRA_a OS=Homo sapiens GN=SERPINC1 PE=3 SV=1	A0A024R944,P01008	SERPINC1	52604.1	15	28	114	SKLPGIVAEGR	K	D	0.99	47.5	25	16	47.5	0	0	3	0	2	1126.66	5382.25	21735500	381	391
Mudpit_Aged L3_4 Posterior NP IAF	Serpin peptidase inhibitor, clade C (Antithrombin), member 1, isoform CRA_a OS=Homo sapiens GN=SERPINC1 PE=3 SV=1	A0A024R944,P01008	SERPINC1	52604.1	15	28	114	TSDQIHFFFAK	K	L	0.997	75.5	25	17.7	75.5	0	2	2	0	2	1340.66	9055.81	68652400	147	157
Mudpit_Aged L3_4 Posterior NP IAF	Serpin peptidase inhibitor, clade C (Antithrombin), member 1, isoform CRA_a OS=Homo sapiens GN=SERPINC1 PE=3 SV=1	A0A024R944,P01008	SERPINC1	52604.1	15	28	114	VAEGTQVLELPFK	R	G	0.997	130	26.2	21.1	130	0	7	1	0	2	1430.79	8352.69	117352000	295	307
Mudpit_Aged L3_4 Posterior NP IAF	Collagen alpha-2(XI) chain (Fragment) OS=Homo sapiens GN=COL11A2 PE=1 SV=1	A0A140T9I7_HUMAN		0	4	5	9	DFSLLTVVR	?	?	0.997	37.6	25.1	15.4	37.6	0	1	0	0	2	1049.6	8953.45	7897290	0	0
Mudpit_Aged L3_4 Posterior NP IAF	Collagen alpha-2(XI) chain (Fragment) OS=Homo sapiens GN=COL11A2 PE=1 SV=1	A0A140T9I7_HUMAN		0	4	5	9	FPSLPDGVR	?	?	0.997	42.7	27.1	15.7	42.7	0	3	0	0	2	987.526	6129.59	34709200	0	0
Mudpit_Aged L3_4 Posterior NP IAF	Collagen alpha-2(XI) chain (Fragment) OS=Homo sapiens GN=COL11A2 PE=1 SV=1	A0A140T9I7_HUMAN		0	4	5	9	GANEDELSPETSPYVK	?	?	0.997	91	25	18.7	91	0	2	0	0	2	1735.8	5010.67	13218400	0	0
Mudpit_Aged L3_4 Posterior NP IAF	Collagen alpha-2(XI) chain (Fragment) OS=Homo sapiens GN=COL11A2 PE=1 SV=1	A0A140T9I7_HUMAN		0	4	5	9	TPVLEQLPVLDASFSDLGAPPR	?	?	0.997	125	26	20.8	125	0	1	2	0	2	2322.23	9322.89	32636200	0	0
Mudpit_Aged L3_4 Posterior NP IAF	Chitinase 3-like 1 (Cartilage glycoprotein-39), isoform CRA_a OS=Homo sapiens GN=CHI3L1 PE=3 SV=1	A0A024R969,P36222	CHI3L1	42627	3	3	4	ILGQQVPYATK	R	G	0.995	34.2	26.4	15.1	34.2	0	1	0	0	2	1217.69	5024.67	3562430	311	321
Mudpit_Aged L3_4 Posterior NP IAF	Chitinase 3-like 1 (Cartilage glycoprotein-39), isoform CRA_a OS=Homo sapiens GN=CHI3L1 PE=3 SV=1	A0A024R969,P36222	CHI3L1	42627	3	3	4	SFTLASSETGVGAPISGPGIPGR	R	F	0.997	130	25.9	21.1	130	0	2	0	0	2	2158.11	7796.23	9075700	264	286
Mudpit_Aged L3_4 Posterior NP IAF	Chitinase 3-like 1 (Cartilage glycoprotein-39), isoform CRA_a OS=Homo sapiens GN=CHI3L1 PE=3 SV=1	A0A024R969,P36222	CHI3L1	42627	3	3	4	TLLSVGGWNFGSQR	K	F	0.997	52	27.3	16.2	52	0	1	0	0	2	1521.78	8179.33	4693340	92	105
Mudpit_Aged L3_4 Posterior NP IAF	cDNA, FLJ94436, highly similar to Homo sapiens platelet derived growth factor C (PDGFC), mRNA OS=Homo sapiens PE=2 SV=1	B2R9K6,Q9NRA1	PDGFC	39029.3	2	3	7	VVDLNLLTEEVR	R	L	0.997	83.6	25	18.2	83.6	0	3	0	0	2	1399.78	8671.21	36917800	235	246
Mudpit_Aged L3_4 Posterior NP IAF	cDNA, FLJ94436, highly similar to Homo sapiens platelet derived growth factor C (PDGFC), mRNA OS=Homo sapiens PE=2 SV=1	B2R9K6,Q9NRA1	PDGFC	39029.3	2	3	7	YDFVEVEEPSDGTILGR	K	W	0.997	80.5	25.1	18	80.5	0	3	1	0	2	1925.91	8203.08	23454000	106	122
Mudpit_Aged L3_4 Posterior NP IAF	Thrombospondin-3 OS=Homo sapiens GN=THBS3 PE=1 SV=2	F5H4Z8,P49746,Q2HIZ0	THBS3	104200	2	2	2	AVTSVSGPGEHLR	K	N	0.996	59.8	27	16.7	59.8	0	0	1	0	2	1309.69	3127.32	9295570	834	846
Mudpit_Aged L3_4 Posterior NP IAF	Thrombospondin-3 OS=Homo sapiens GN=THBS3 PE=1 SV=2	F5H4Z8,P49746,Q2HIZ0	THBS3	104200	2	2	2	WLEASVVGK	R	I	0.977	33.5	29	15.1	33.5	0	1	0	0	2	988.546	5623.01	13630000	84	92
Mudpit_Aged L3_4 Posterior NP IAF	CP protein OS=Homo sapiens GN=CP PE=2 SV=1	A5PL27,A8K5A4,P00450	CP	122208	24	40	130	AEEEHLGILGPQLHADVGDK	K	V	0.997	87.7	26.7	18.5	87.7	0	2	7	4	2	2128.07	8925.95	300864000	800	819
Mudpit_Aged L3_4 Posterior NP IAF	CP protein OS=Homo sapiens GN=CP PE=2 SV=1	A5PL27,A8K5A4,P00450	CP	122208	24	40	130	ALYLQYTDETFR	K	T	0.997	64.5	26.2	17	64.5	0	4	0	0	2	1519.74	7362.05	376167000	70	81
Mudpit_Aged L3_4 Posterior NP IAF	CP protein OS=Homo sapiens GN=CP PE=2 SV=1	A5PL27,A8K5A4,P00450	CP	122208	24	40	130	DDEEFIESNK	K	M	0.997	47.8	25	16	47.8	0	3	0	0	2	1225.52	3659.7	19090200	948	957
Mudpit_Aged L3_4 Posterior NP IAF	CP protein OS=Homo sapiens GN=CP PE=2 SV=1	A5PL27,A8K5A4,P00450	CP	122208	24	40	130	DIFTGLIGPMK	K	I	0.997	64.4	27.5	17	64.4	0	4	0	0	2	1191.64	8711.29	164482000	548	558
Mudpit_Aged L3_4 Posterior NP IAF	CP protein OS=Homo sapiens GN=CP PE=2 SV=1	A5PL27,A8K5A4,P00450	CP	122208	24	40	130	DVDKEFYLFPTVFDENESLLLEDNIR	K	M	0.987	41.4	25.8	15.6	41.4	0	0	1	0	2	3160.54	10488.1	193967	573	598
Mudpit_Aged L3_4 Posterior NP IAF	CP protein OS=Homo sapiens GN=CP PE=2 SV=1	A5PL27,A8K5A4,P00450	CP	122208	24	40	130	EVGPTNADPVCLAK	K	M	0.952	23.7	25.1	14.5	23.7	0	1	0	0	2	1471.71	5182.9	8235140	524	537
Mudpit_Aged L3_4 Posterior NP IAF	CP protein OS=Homo sapiens GN=CP PE=2 SV=1	A5PL27,A8K5A4,P00450	CP	122208	24	40	130	EYTDASFTNR	R	K	0.997	54.1	25	16.4	54.1	0	4	0	0	2	1203.53	3000.38	62001900	427	436
Mudpit_Aged L3_4 Posterior NP IAF	CP protein OS=Homo sapiens GN=CP PE=2 SV=1	A5PL27,A8K5A4,P00450	CP	122208	24	40	130	GAYPLSIEPIGVR	K	F	0.997	50.6	27.4	16.2	50.6	0	3	1	0	2	1371.76	8011.92	101943000	469	481
Mudpit_Aged L3_4 Posterior NP IAF	CP protein OS=Homo sapiens GN=CP PE=2 SV=1	A5PL27,A8K5A4,P00450	CP	122208	24	40	130	GEFYIGSK	K	Y	0.972	29	25	14.8	29	0	2	0	0	2	900.446	4061.26	28102000	771	778
Mudpit_Aged L3_4 Posterior NP IAF	CP protein OS=Homo sapiens GN=CP PE=2 SV=1	A5PL27,A8K5A4,P00450	CP	122208	24	40	130	GPEEEHLGILGPVIWAEVGDTIR	R	V	0.991	48.6	26.1	16	48.6	0	0	2	0	2	2487.29	9501.22	12784800	440	462
Mudpit_Aged L3_4 Posterior NP IAF	CP protein OS=Homo sapiens GN=CP PE=2 SV=1	A5PL27,A8K5A4,P00450	CP	122208	24	40	130	GVYSSDVFDIFPGTYQTLEMFPR	R	T	0.997	100	25	19.3	100	0	4	6	0	2	2669.26	9471.08	133865000	1009	1031
Mudpit_Aged L3_4 Posterior NP IAF	CP protein OS=Homo sapiens GN=CP PE=2 SV=1	A5PL27,A8K5A4,P00450	CP	122208	24	40	130	HYYIGIIETTWDYASDHGEK	K	K	0.996	65.1	25	17.1	65.1	0	0	2	0	2	2398.1	9546.78	2806620	23	42
Mudpit_Aged L3_4 Posterior NP IAF	CP protein OS=Homo sapiens GN=CP PE=2 SV=1	A5PL27,A8K5A4,P00450	CP	122208	24	40	130	IYHSHIDAPK	R	D	0.982	43.6	26.8	15.7	43.6	0	0	2	0	2	1180.61	5185.13	15132200	178	187
Mudpit_Aged L3_4 Posterior NP IAF	CP protein OS=Homo sapiens GN=CP PE=2 SV=1	A5PL27,A8K5A4,P00450	CP	122208	24	40	130	LISVDTEHSNIYLQNGPDR	K	I	0.997	115	26.6	20.2	115	0	1	2	0	2	2171.07	5779.14	178875000	44	62
Mudpit_Aged L3_4 Posterior NP IAF	CP protein OS=Homo sapiens GN=CP PE=2 SV=1	A5PL27,A8K5A4,P00450	CP	122208	24	40	130	MFTTAPDQVDK	R	E	0.997	50.2	25.1	17.5	48.8	0	3	0	0	2	1252.59	3696.76	17960700	599	609
Mudpit_Aged L3_4 Posterior NP IAF	CP protein OS=Homo sapiens GN=CP PE=2 SV=1	A5PL27,A8K5A4,P00450	CP	122208	24	40	130	MFTTAPDQVDKEDEDFQESNK	R	M	0.997	97.6	25	19.1	97.6	0	7	13	0	2	2490.06	5568.97	180057000	599	619
Mudpit_Aged L3_4 Posterior NP IAF	CP protein OS=Homo sapiens GN=CP PE=2 SV=1	A5PL27,A8K5A4,P00450	CP	122208	24	40	130	MYSVNGYTFGSLPGLSMCAEDR	R	V	0.997	68.3	25	17.3	68.3	0	6	0	0	2	2472.05	9080.85	42890100	259	280
Mudpit_Aged L3_4 Posterior NP IAF	CP protein OS=Homo sapiens GN=CP PE=2 SV=1	A5PL27,A8K5A4,P00450	CP	122208	24	40	130	MYYSAVDPTK	K	D	0.997	53.3	25	16.3	53.3	0	14	0	0	2	1190.54	3215.03	120420000	538	547
Mudpit_Aged L3_4 Posterior NP IAF	CP protein OS=Homo sapiens GN=CP PE=2 SV=1	A5PL27,A8K5A4,P00450	CP	122208	24	40	130	NNEGTYYSPNYNPQSR	K	S	0.997	87.9	25	18.5	87.9	0	5	2	0	2	1903.82	3781.6	36539500	485	500
Mudpit_Aged L3_4 Posterior NP IAF	CP protein OS=Homo sapiens GN=CP PE=2 SV=1	A5PL27,A8K5A4,P00450	CP	122208	24	40	130	QSEDSTFYLGER	R	T	0.997	81.9	25	18.1	81.9	0	6	0	0	2	1431.64	5073.29	62894500	721	732
Mudpit_Aged L3_4 Posterior NP IAF	CP protein OS=Homo sapiens GN=CP PE=2 SV=1	A5PL27,A8K5A4,P00450	CP	122208	24	40	130	QYTDSTFR	R	V	0.974	29.9	25	14.9	29.9	0	1	0	0	2	1017.46	2417.43	4887800	786	793
Mudpit_Aged L3_4 Posterior NP IAF	CP protein OS=Homo sapiens GN=CP PE=2 SV=1	A5PL27,A8K5A4,P00450	CP	122208	24	40	130	SGAGTEDSACIPWAYYSTVDQVK	R	D	0.997	73.6	25	17.6	73.6	0	2	0	0	2	2506.11	8374.79	2856940	865	887
Mudpit_Aged L3_4 Posterior NP IAF	CP protein OS=Homo sapiens GN=CP PE=2 SV=1	A5PL27,A8K5A4,P00450	CP	122208	24	40	130	SVPPSASHVAPTETFTYEWTVPK	R	E	0.996	58.3	25.9	16.6	58.3	0	1	10	0	2	2531.25	8958.84	266878000	501	523
Mudpit_Aged L3_4 Posterior NP IAF	CP protein OS=Homo sapiens GN=CP PE=2 SV=1	A5PL27,A8K5A4,P00450	CP	122208	24	40	130	TTIEKPVWLGFLGPIIK	R	A	0.992	50.6	25	16.2	50.6	0	0	5	0	2	1912.13	9649.21	8117510	82	98
Mudpit_Aged L3_4 Posterior NP IAF	Putative uncharacterized protein DKFZp686O12165 (Fragment) OS=Homo sapiens GN=DKFZp686O12165 PE=1 SV=1	Q6MZM7	DKFZp686O12165	240636	2	2	15	DDKESVPISDTIIPEVPQLTDLSFVDITDSSIGLR	K	W	0.997	65.2	25.2	17.1	65.2	0	0	12	0	2	3814.95	9666.54	28965600	999	1033
Mudpit_Aged L3_4 Posterior NP IAF	Putative uncharacterized protein DKFZp686O12165 (Fragment) OS=Homo sapiens GN=DKFZp686O12165 PE=1 SV=1	Q6MZM7	DKFZp686O12165	240636	2	2	15	ESVPISDTIIPEVPQLTDLSFVDITDSSIGLR	K	W	0.996	80.4	25	18	80.4	0	0	3	0	2	3456.8	9524.48	26236000	1002	1033
Mudpit_Aged L3_4 Posterior NP IAF	cDNA FLJ76254, highly similar to Homo sapiens gamma-glutamyl hydrolase (GGH), mRNA OS=Homo sapiens PE=2 SV=1	A8K335,Q92820	GGH	35965.9	3	3	3	FFNVLTTNTDGK	K	I	0.992	34.9	25.4	15.2	34.9	0	1	0	0	2	1356.68	6517.87	9487590	213	224
Mudpit_Aged L3_4 Posterior NP IAF	cDNA FLJ76254, highly similar to Homo sapiens gamma-glutamyl hydrolase (GGH), mRNA OS=Homo sapiens PE=2 SV=1	A8K335,Q92820	GGH	35965.9	3	3	3	IEFISTMEGYK	K	Y	0.991	49	26.5	16.1	49	0	1	0	0	2	1317.64	6884.08	8449430	225	235
Mudpit_Aged L3_4 Posterior NP IAF	cDNA FLJ76254, highly similar to Homo sapiens gamma-glutamyl hydrolase (GGH), mRNA OS=Homo sapiens PE=2 SV=1	A8K335,Q92820	GGH	35965.9	3	3	3	SINGILFPGGSVDLR	K	R	0.997	54.8	26.6	16.4	54.8	0	1	0	0	2	1544.84	8996.22	6003050	89	103
Mudpit_Aged L3_4 Posterior NP IAF	14-3-3 protein theta OS=Homo sapiens GN=YWHAQ PE=1 SV=1	P27348	YWHAQ	27765.4	2	2	2	AVTEQGAELSNEER	K	N	0.997	66.5	25	17.2	66.5	0	1	0	0	2	1532.72	2353.84	4967670	28	41
Mudpit_Aged L3_4 Posterior NP IAF	14-3-3 protein theta OS=Homo sapiens GN=YWHAQ PE=1 SV=1	P27348	YWHAQ	27765.4	2	2	2	QTIDNSQGAYQEAFDISK	K	K	0.997	64.2	25.7	17	64.2	0	1	0	0	2	2014.94	6272.92	2152930	140	157
Mudpit_Aged L3_4 Posterior NP IAF	Tumor necrosis factor-inducible gene 6 protein OS=Homo sapiens GN=TNFAIP6 PE=1 SV=2	P98066	TNFAIP6	31204.4	5	6	12	FLSDASVTAGGFQIK	K	Y	0.997	75.8	26.6	17.7	75.8	0	5	0	0	2	1540.8	7430.11	50843000	229	243
Mudpit_Aged L3_4 Posterior NP IAF	Tumor necrosis factor-inducible gene 6 protein OS=Homo sapiens GN=TNFAIP6 PE=1 SV=2	P98066	TNFAIP6	31204.4	5	6	12	SPGFPNEYEDNQICYWHIR	K	L	0.996	56.5	25	16.5	56.5	0	0	2	0	2	2426.05	8246.93	16397100	148	166
Mudpit_Aged L3_4 Posterior NP IAF	Tumor necrosis factor-inducible gene 6 protein OS=Homo sapiens GN=TNFAIP6 PE=1 SV=2	P98066	TNFAIP6	31204.4	5	6	12	TGIIDYGIR	K	L	0.995	40.4	27.4	15.5	40.4	0	1	0	0	2	1007.55	5412.62	19050800	108	116
Mudpit_Aged L3_4 Posterior NP IAF	Tumor necrosis factor-inducible gene 6 protein OS=Homo sapiens GN=TNFAIP6 PE=1 SV=2	P98066	TNFAIP6	31204.4	5	6	12	YCGDELPDDIISTGNVMTLK	R	F	0.994	49.9	25	16.1	49.9	0	1	0	0	2	2242.03	9005.79	3587190	209	228
Mudpit_Aged L3_4 Posterior NP IAF	Tumor necrosis factor-inducible gene 6 protein OS=Homo sapiens GN=TNFAIP6 PE=1 SV=2	P98066	TNFAIP6	31204.4	5	6	12	YVAMDPVSK	K	S	0.997	35.3	25.4	15.2	35.3	0	3	0	0	2	1009.5	3221.82	16042700	244	252
Mudpit_Aged L3_4 Posterior NP IAF	Apolipoprotein M OS=Homo sapiens GN=APOM PE=1 SV=2	O95445	APOM	21253.9	2	2	8	EELATFDPVDNIVFNMAAGSAPMQLHLR	K	A	0.946	33.8	28.9	15.1	30.4	0	0	1	0	2	3102.5	9841.49	317036	58	85
Mudpit_Aged L3_4 Posterior NP IAF	Apolipoprotein M OS=Homo sapiens GN=APOM PE=1 SV=2	O95445	APOM	21253.9	2	2	8	WIYHLTEGSTDLR	K	T	0.994	55	26.4	16.4	55	0	0	7	0	2	1590.79	8231.5	77521600	100	112
Mudpit_Aged L3_4 Posterior NP IAF	CD109 antigen OS=Homo sapiens GN=CD109 PE=1 SV=2	Q6YHK3	CD109	161692	10	10	15	ADGNQLTLEER	R	R	0.997	95	26.6	30.1	83.8	0	3	0	0	2	1245.61	3504.77	9556590	375	385
Mudpit_Aged L3_4 Posterior NP IAF	CD109 antigen OS=Homo sapiens GN=CD109 PE=1 SV=2	Q6YHK3	CD109	161692	10	10	15	AEQEGGMQFWVSSESK	R	L	0.997	64.2	25	17	64.2	0	1	0	0	2	1799.79	6518.3	5396590	1115	1130
Mudpit_Aged L3_4 Posterior NP IAF	CD109 antigen OS=Homo sapiens GN=CD109 PE=1 SV=2	Q6YHK3	CD109	161692	10	10	15	ELSYMVVSR	K	G	0.997	47.3	25.3	16	47.3	0	2	0	0	2	1099.55	3910.26	15673600	495	503
Mudpit_Aged L3_4 Posterior NP IAF	CD109 antigen OS=Homo sapiens GN=CD109 PE=1 SV=2	Q6YHK3	CD109	161692	10	10	15	IEFPILEDSSELQLK	K	A	0.997	73.8	28.1	17.6	73.8	0	1	0	0	2	1760.93	9110.08	11468800	430	444
Mudpit_Aged L3_4 Posterior NP IAF	CD109 antigen OS=Homo sapiens GN=CD109 PE=1 SV=2	Q6YHK3	CD109	161692	10	10	15	ISVTQPDSIVGIVAVDK	R	S	0.997	59.2	25	16.7	59.2	0	1	0	0	2	1740.97	7967.19	2590060	578	594
Mudpit_Aged L3_4 Posterior NP IAF	CD109 antigen OS=Homo sapiens GN=CD109 PE=1 SV=2	Q6YHK3	CD109	161692	10	10	15	LSDSWQPR	K	S	0.99	51.1	25	16.8	50.6	0	1	0	0	2	988.485	3274.29	8677080	1131	1138
Mudpit_Aged L3_4 Posterior NP IAF	CD109 antigen OS=Homo sapiens GN=CD109 PE=1 SV=2	Q6YHK3	CD109	161692	10	10	15	NSLGGFASTQDTTVALK	R	A	0.997	81.7	30.9	18.1	81.7	0	2	0	0	2	1709.87	6192.42	6578790	1173	1189
Mudpit_Aged L3_4 Posterior NP IAF	CD109 antigen OS=Homo sapiens GN=CD109 PE=1 SV=2	Q6YHK3	CD109	161692	10	10	15	SYSQSILLDLTDNR	K	L	0.997	77.1	26.9	17.8	77.1	0	1	0	0	2	1624.82	8021.73	6022660	859	872
Mudpit_Aged L3_4 Posterior NP IAF	CD109 antigen OS=Homo sapiens GN=CD109 PE=1 SV=2	Q6YHK3	CD109	161692	10	10	15	TNIQVTVTGPSSPSPVK	R	F	0.997	81	25.1	18.1	81	0	2	0	0	2	1711.92	5292.6	7699240	1203	1219
Mudpit_Aged L3_4 Posterior NP IAF	CD109 antigen OS=Homo sapiens GN=CD109 PE=1 SV=2	Q6YHK3	CD109	161692	10	10	15	VGSPFELVVSGNK	K	R	0.997	61.1	29.7	16.8	61.1	0	1	0	0	2	1332.72	7496.74	10140600	479	491
Mudpit_Aged L3_4 Posterior NP IAF	C-type lectin domain family 3 member A OS=Homo sapiens GN=CLEC3A PE=1 SV=1	J3KNC9,O75596,Q3SX92	CLEC3A	22233	2	2	2	GGILVIPR	K	N	0.99	35.6	25	15.2	35.6	0	1	0	0	2	824.535	6139.22	5024300	99	106
Mudpit_Aged L3_4 Posterior NP IAF	C-type lectin domain family 3 member A OS=Homo sapiens GN=CLEC3A PE=1 SV=1	J3KNC9,O75596,Q3SX92	CLEC3A	22233	2	2	2	NSDEINALQDYGK	R	R	0.997	70.5	25.7	17.4	70.5	0	1	0	0	2	1466.68	5132.22	9661850	107	119
Mudpit_Aged L3_4 Posterior NP IAF	Fatty acid-binding protein, heart OS=Homo sapiens GN=FABP3 PE=1 SV=4	P05413,Q6IBD7,S4R371	FABP3	14858.5	2	2	3	LGVEFDETTADDR	K	K	0.975	29.2	25	14.8	29.2	0	1	0	0	2	1467.66	5457.56	4150900	67	79
Mudpit_Aged L3_4 Posterior NP IAF	Fatty acid-binding protein, heart OS=Homo sapiens GN=FABP3 PE=1 SV=4	P05413,Q6IBD7,S4R371	FABP3	14858.5	2	2	3	WDGQETTLVR	K	E	0.997	55.9	26.5	16.5	55.9	0	2	0	0	2	1204.6	4368.56	16857900	98	107
Mudpit_Aged L3_4 Posterior NP IAF	Uncharacterized protein OS=Homo sapiens PE=1 SV=1	B4E1Z4		140944	20	27	80	ALFVSEEEK	K	K	0.997	44	26.7	15.8	44	0	1	0	0	2	1051.53	3865.23	44074000	1132	1140
Mudpit_Aged L3_4 Posterior NP IAF	Uncharacterized protein OS=Homo sapiens PE=1 SV=1	B4E1Z4		140944	20	27	80	ALFVSEEEKK	K	L	0.997	62.2	26.7	43.2	35.8	0	2	3	0	2	1179.63	3910.43	171061000	1132	1141
Mudpit_Aged L3_4 Posterior NP IAF	Uncharacterized protein OS=Homo sapiens PE=1 SV=1	B4E1Z4		140944	20	27	80	AVISPGFDVFAK	K	K	0.997	45.8	25.6	15.9	45.8	0	2	0	0	2	1250.68	8255.01	15618500	385	396
Mudpit_Aged L3_4 Posterior NP IAF	Uncharacterized protein OS=Homo sapiens PE=1 SV=1	B4E1Z4		140944	20	27	80	CLVNLIEK	K	V	0.99	33.9	27.4	23.4	25.6	0	1	0	0	2	989.534	6744.12	4996030	794	801
Mudpit_Aged L3_4 Posterior NP IAF	Uncharacterized protein OS=Homo sapiens PE=1 SV=1	B4E1Z4		140944	20	27	80	DAQYAPGYDK	R	V	0.951	29	25	14.8	29	0	1	0	0	2	1127.5	2144.27	4092100	1161	1170
Mudpit_Aged L3_4 Posterior NP IAF	Uncharacterized protein OS=Homo sapiens PE=1 SV=1	B4E1Z4		140944	20	27	80	DISEVVTPR	K	F	0.997	36.9	27.3	15.3	36.9	0	4	0	0	2	1015.54	4376.22	199765000	1173	1181
Mudpit_Aged L3_4 Posterior NP IAF	Uncharacterized protein OS=Homo sapiens PE=1 SV=1	B4E1Z4		140944	20	27	80	EAGIPEFYDYDVALIK	K	L	0.997	75.9	25.9	17.7	75.9	0	6	1	0	2	1842.92	9138.69	222716000	1068	1083
Mudpit_Aged L3_4 Posterior NP IAF	Uncharacterized protein OS=Homo sapiens PE=1 SV=1	B4E1Z4		140944	20	27	80	EELLPAQDIK	K	A	0.997	48	25	16	48	0	4	0	0	2	1155.63	5403.81	65052200	1122	1131
Mudpit_Aged L3_4 Posterior NP IAF	Uncharacterized protein OS=Homo sapiens PE=1 SV=1	B4E1Z4		140944	20	27	80	GDSGGPLIVHK	R	R	0.997	61.6	26.4	16.8	61.6	0	1	1	0	2	1079.58	3038.68	6164440	1199	1209
Mudpit_Aged L3_4 Posterior NP IAF	Uncharacterized protein OS=Homo sapiens PE=1 SV=1	B4E1Z4		140944	20	27	80	HAIILLTDGK	R	S	0.997	58.7	25	16.7	58.7	0	4	0	0	2	1080.64	5997.12	29807300	216	225
Mudpit_Aged L3_4 Posterior NP IAF	Uncharacterized protein OS=Homo sapiens PE=1 SV=1	B4E1Z4		140944	20	27	80	KEAGIPEFYDYDVALIK	K	L	0.997	92.3	26.3	18.8	92.3	0	5	5	0	2	1971.01	9694.66	81768800	1067	1083
Mudpit_Aged L3_4 Posterior NP IAF	Uncharacterized protein OS=Homo sapiens PE=1 SV=1	B4E1Z4		140944	20	27	80	LLGMETMAWQEIR	R	H	0.997	74.4	26.8	17.7	74.4	0	5	0	0	2	1593.78	8368.15	67017600	203	215
Mudpit_Aged L3_4 Posterior NP IAF	Uncharacterized protein OS=Homo sapiens PE=1 SV=1	B4E1Z4		140944	20	27	80	NDYLDIYAIGVGK	R	L	0.997	61.9	26.9	16.9	61.9	0	1	0	0	2	1440.74	8151.08	7001210	250	262
Mudpit_Aged L3_4 Posterior NP IAF	Uncharacterized protein OS=Homo sapiens PE=1 SV=1	B4E1Z4		140944	20	27	80	NQGILEFYGDDIALLK	K	L	0.997	84.6	27	18.3	84.6	0	2	0	0	2	1808.94	9274.55	17434700	398	413
Mudpit_Aged L3_4 Posterior NP IAF	Uncharacterized protein OS=Homo sapiens PE=1 SV=1	B4E1Z4		140944	20	27	80	QLNEINYEDHK	K	L	0.997	52.4	25	16.3	52.4	0	4	3	0	2	1402.66	2954.99	162760000	840	850
Mudpit_Aged L3_4 Posterior NP IAF	Uncharacterized protein OS=Homo sapiens PE=1 SV=1	B4E1Z4		140944	20	27	80	SSGQWQTPGATR	K	S	0.993	34.8	25	15.2	34.8	0	1	0	0	2	1275.61	2496.54	1056910	66	77
Mudpit_Aged L3_4 Posterior NP IAF	Uncharacterized protein OS=Homo sapiens PE=1 SV=1	B4E1Z4		140944	20	27	80	STGSWSTLK	R	T	0.997	45.7	32	15.9	45.7	0	3	0	0	2	966.489	3872.29	35339700	580	588
Mudpit_Aged L3_4 Posterior NP IAF	Uncharacterized protein OS=Homo sapiens PE=1 SV=1	B4E1Z4		140944	20	27	80	VSEADSSNADWVTK	K	Q	0.997	114	25	20.1	114	0	14	0	0	2	1508.69	3695.72	188996000	826	839
Mudpit_Aged L3_4 Posterior NP IAF	Uncharacterized protein OS=Homo sapiens PE=1 SV=1	B4E1Z4		140944	20	27	80	WSGQTAICDNGAGYCSNPGIPIGTR	R	K	0.997	91.6	25	18.7	91.6	0	1	0	0	2	2654.16	7233.85	1178980	653	677
Mudpit_Aged L3_4 Posterior NP IAF	Uncharacterized protein OS=Homo sapiens PE=1 SV=1	B4E1Z4		140944	20	27	80	YGLVTYATYPK	R	I	0.997	67.1	27.3	17.2	67.1	0	5	0	0	2	1275.66	6302.29	93169900	811	821
Mudpit_Aged L3_4 Posterior NP IAF	UTP--glucose-1-phosphate uridylyltransferase OS=Homo sapiens GN=UGP2 PE=1 SV=1	A0A087WYS1,B4DUP2,E7EUC7,Q16851	UGP2	56942	2	2	2	LVEIAQVPK	R	A	0.993	37.4	25	15.3	37.4	0	1	0	0	2	996.609	5191.69	3688390	304	312
Mudpit_Aged L3_4 Posterior NP IAF	UTP--glucose-1-phosphate uridylyltransferase OS=Homo sapiens GN=UGP2 PE=1 SV=1	A0A087WYS1,B4DUP2,E7EUC7,Q16851	UGP2	56942	2	2	2	QELELSVK	R	K	0.99	52.6	28.8	41.7	27.3	0	1	0	0	2	945.525	4155.49	5470760	26	33
Mudpit_Aged L3_4 Posterior NP IAF	Vitronectin OS=Homo sapiens GN=VTN PE=4 SV=1	D9ZGG2,P04004	VTN	54306.1	8	14	76	DVWGIEGPIDAAFTR	R	I	0.997	86.5	26.3	18.4	86.5	0	9	1	0	2	1646.82	9231.53	363223000	198	212
Mudpit_Aged L3_4 Posterior NP IAF	Vitronectin OS=Homo sapiens GN=VTN PE=4 SV=1	D9ZGG2,P04004	VTN	54306.1	8	14	76	DWHGVPGQVDAAMAGR	R	I	0.997	65.7	25.1	17.1	65.7	0	13	20	0	2	1666.78	5682.64	529337000	338	353
Mudpit_Aged L3_4 Posterior NP IAF	Vitronectin OS=Homo sapiens GN=VTN PE=4 SV=1	D9ZGG2,P04004	VTN	54306.1	8	14	76	FEDGVLDPDYPR	R	N	0.997	79.8	25	18	79.8	0	18	1	0	2	1422.65	6270.51	1897700000	230	241
Mudpit_Aged L3_4 Posterior NP IAF	Vitronectin OS=Homo sapiens GN=VTN PE=4 SV=1	D9ZGG2,P04004	VTN	54306.1	8	14	76	GQYCYELDEK	R	A	0.997	38.9	25	15.4	38.9	0	1	0	0	2	1305.53	4559.22	4732500	177	186
Mudpit_Aged L3_4 Posterior NP IAF	Vitronectin OS=Homo sapiens GN=VTN PE=4 SV=1	D9ZGG2,P04004	VTN	54306.1	8	14	76	MDWLVPATCEPIQSVFFFSGDK	R	Y	0.949	48.8	25	16.1	48.8	0	0	1	0	2	2591.18	9416.21	8401570	422	443
Mudpit_Aged L3_4 Posterior NP IAF	Vitronectin OS=Homo sapiens GN=VTN PE=4 SV=1	D9ZGG2,P04004	VTN	54306.1	8	14	76	NISDGFDGIPDNVDAALALPAHSYSGR	R	E	0.971	37.1	25.7	15.3	37.1	0	0	1	0	2	2772.32	9416.19	10374100	242	268
Mudpit_Aged L3_4 Posterior NP IAF	Vitronectin OS=Homo sapiens GN=VTN PE=4 SV=1	D9ZGG2,P04004	VTN	54306.1	8	14	76	RVDTVDPPYPR	R	S	0.997	68	26.3	17.7	67.5	0	3	4	0	2	1314.68	3991.85	756884000	453	463
Mudpit_Aged L3_4 Posterior NP IAF	Vitronectin OS=Homo sapiens GN=VTN PE=4 SV=1	D9ZGG2,P04004	VTN	54306.1	8	14	76	VDTVDPPYPR	R	S	0.997	52.8	25	16.3	52.8	0	4	0	0	2	1158.58	3896.11	350562000	454	463
Mudpit_Aged L3_4 Posterior NP IAF	cDNA FLJ51597, highly similar to C4b-binding protein alpha chain OS=Homo sapiens PE=2 SV=1	B4E1D8,B4E1E1,P04003	C4BPA	67033	4	4	10	EDVYVVGTVLR	K	Y	0.997	50.8	25	16.2	50.8	0	2	0	0	2	1249.68	6609.59	17473100	319	329
Mudpit_Aged L3_4 Posterior NP IAF	cDNA FLJ51597, highly similar to C4b-binding protein alpha chain OS=Homo sapiens PE=2 SV=1	B4E1D8,B4E1E1,P04003	C4BPA	67033	4	4	10	GYILVGQAK	K	L	0.959	27.1	25.3	14.7	27.1	0	1	0	0	2	948.551	4257	9045210	457	465
Mudpit_Aged L3_4 Posterior NP IAF	cDNA FLJ51597, highly similar to C4b-binding protein alpha chain OS=Homo sapiens PE=2 SV=1	B4E1D8,B4E1E1,P04003	C4BPA	67033	4	4	10	LSLEIEQLELQR	K	D	0.997	72.7	25.7	24.1	66.1	0	3	0	0	2	1470.82	8319.79	24687900	574	585
Mudpit_Aged L3_4 Posterior NP IAF	cDNA FLJ51597, highly similar to C4b-binding protein alpha chain OS=Homo sapiens PE=2 SV=1	B4E1D8,B4E1E1,P04003	C4BPA	67033	4	4	10	QSSSYSFFK	K	E	0.997	69.5	25	19.3	67.5	0	4	0	0	2	1080.5	5029.48	20259300	439	447
Mudpit_Aged L3_4 Posterior NP IAF	Fibronectin type III domain-containing protein 1 OS=Homo sapiens GN=FNDC1 PE=2 SV=4	Q4ZHG4	FNDC1	205558	6	7	10	AQDVQQSTDADTEGHSPK	K	A	0.985	40.8	25	15.5	40.8	0	0	1	0	2	1913.85	1823.16	1660960	949	966
Mudpit_Aged L3_4 Posterior NP IAF	Fibronectin type III domain-containing protein 1 OS=Homo sapiens GN=FNDC1 PE=2 SV=4	Q4ZHG4	FNDC1	205558	6	7	10	GLVLNAEGR	R	Y	0.997	42.1	25.2	15.6	42.1	0	1	0	0	2	928.521	3318.88	5043400	1363	1371
Mudpit_Aged L3_4 Posterior NP IAF	Fibronectin type III domain-containing protein 1 OS=Homo sapiens GN=FNDC1 PE=2 SV=4	Q4ZHG4	FNDC1	205558	6	7	10	ISEEDELDVPDDISVR	K	V	0.997	57.9	25.2	16.6	57.9	0	1	0	0	2	1830.86	6979.94	2507180	254	269
Mudpit_Aged L3_4 Posterior NP IAF	Fibronectin type III domain-containing protein 1 OS=Homo sapiens GN=FNDC1 PE=2 SV=4	Q4ZHG4	FNDC1	205558	6	7	10	IYLSDNLK	K	D	0.99	33.6	26.5	15.1	33.6	0	2	0	0	2	965.53	4338.27	15782400	1808	1815
Mudpit_Aged L3_4 Posterior NP IAF	Fibronectin type III domain-containing protein 1 OS=Homo sapiens GN=FNDC1 PE=2 SV=4	Q4ZHG4	FNDC1	205558	6	7	10	SLTYPGDTTSALVDGLQPGER	K	Y	0.997	121	27	20.5	121	0	2	0	0	2	2177.07	7459.05	10342700	410	430
Mudpit_Aged L3_4 Posterior NP IAF	Fibronectin type III domain-containing protein 1 OS=Homo sapiens GN=FNDC1 PE=2 SV=4	Q4ZHG4	FNDC1	205558	6	7	10	TGPQSYVEALPTIQGYYR	R	Q	0.997	85.9	27.6	18.4	85.9	0	2	1	0	2	2043.02	8904.21	17155700	1843	1860
Mudpit_Aged L3_4 Posterior NP IAF	Phosphoglucomutase-1 OS=Homo sapiens GN=PGM1 PE=1 SV=3	P36871	PGM1	61451.1	6	6	7	ADNFEYSDPVDGSISR	K	N	0.997	83	25	18.2	83	0	1	0	0	2	1771.78	5852.5	2643350	471	486
Mudpit_Aged L3_4 Posterior NP IAF	Phosphoglucomutase-1 OS=Homo sapiens GN=PGM1 PE=1 SV=3	P36871	PGM1	61451.1	6	6	7	LIFTDGSR	R	I	0.99	46.6	26.8	32.6	29.8	0	2	0	0	2	908.484	4526.32	14361500	492	499
Mudpit_Aged L3_4 Posterior NP IAF	Phosphoglucomutase-1 OS=Homo sapiens GN=PGM1 PE=1 SV=3	P36871	PGM1	61451.1	6	6	7	LSGTGSAGATIR	R	L	0.997	41.1	27.9	15.6	41.1	0	1	0	0	2	1090.59	2088.86	2880440	504	515
Mudpit_Aged L3_4 Posterior NP IAF	Phosphoglucomutase-1 OS=Homo sapiens GN=PGM1 PE=1 SV=3	P36871	PGM1	61451.1	6	6	7	LYIDSYEK	R	D	0.953	29.7	26.2	14.9	29.7	0	1	0	0	2	1030.51	3755.47	6400740	516	523
Mudpit_Aged L3_4 Posterior NP IAF	Phosphoglucomutase-1 OS=Homo sapiens GN=PGM1 PE=1 SV=3	P36871	PGM1	61451.1	6	6	7	QEATLVVGGDGR	R	F	0.997	54.7	26.5	16.4	54.7	0	1	0	0	2	1201.62	3188.25	3738950	53	64
Mudpit_Aged L3_4 Posterior NP IAF	Phosphoglucomutase-1 OS=Homo sapiens GN=PGM1 PE=1 SV=3	P36871	PGM1	61451.1	6	6	7	VDLGVLGK	K	Q	0.99	48.5	25.5	16	48.5	0	1	0	0	2	800.488	5071.28	5515620	165	172
Mudpit_Aged L3_4 Posterior NP IAF	Epididymis luminal secretory protein 52 OS=Homo sapiens GN=EL52 PE=2 SV=1	K9JA46,P07900,Q2VPJ6	EL52,HSP90AA1	84663.2	5	5	6	ADLINNLGTIAK	K	S	0.997	40.7	26.3	18.8	37.4	0	1	0	0	2	1242.71	7119.25	4606880	101	112
Mudpit_Aged L3_4 Posterior NP IAF	Epididymis luminal secretory protein 52 OS=Homo sapiens GN=EL52 PE=2 SV=1	K9JA46,P07900,Q2VPJ6	EL52,HSP90AA1	84663.2	5	5	6	DQVANSAFVER	K	L	0.997	47	26.4	15.9	47	0	2	0	0	2	1235.6	3495.03	5946210	500	510
Mudpit_Aged L3_4 Posterior NP IAF	Epididymis luminal secretory protein 52 OS=Homo sapiens GN=EL52 PE=2 SV=1	K9JA46,P07900,Q2VPJ6	EL52,HSP90AA1	84663.2	5	5	6	EDQTEYLEER	K	R	0.997	58.3	25	16.6	58.3	0	1	0	0	2	1311.57	3475.27	5774250	192	201
Mudpit_Aged L3_4 Posterior NP IAF	Epididymis luminal secretory protein 52 OS=Homo sapiens GN=EL52 PE=2 SV=1	K9JA46,P07900,Q2VPJ6	EL52,HSP90AA1	84663.2	5	5	6	EGLELPEDEEEK	K	K	0.964	27.9	25	14.7	27.9	0	1	0	0	2	1416.64	5082.44	2654700	547	558
Mudpit_Aged L3_4 Posterior NP IAF	Epididymis luminal secretory protein 52 OS=Homo sapiens GN=EL52 PE=2 SV=1	K9JA46,P07900,Q2VPJ6	EL52,HSP90AA1	84663.2	5	5	6	ELISNSSDALDK	R	I	0.997	64.6	26.3	20.9	60.7	0	1	0	0	2	1291.64	4099.47	1873090	47	58
Mudpit_Aged L3_4 Posterior NP IAF	Profilin-1 OS=Homo sapiens GN=PFN1 PE=1 SV=2	P07737	PFN1	15054.3	4	4	5	DSLLQDGEFSMDLR	R	T	0.997	73.5	35.9	17.6	73.5	0	2	0	0	2	1625.75	8749.45	9154280	76	89
Mudpit_Aged L3_4 Posterior NP IAF	Profilin-1 OS=Homo sapiens GN=PFN1 PE=1 SV=2	P07737	PFN1	15054.3	4	4	5	DSPSVWAAVPGK	K	T	0.997	49.1	25.8	16.1	49.1	0	1	0	0	2	1213.62	5713.47	6820490	27	38
Mudpit_Aged L3_4 Posterior NP IAF	Profilin-1 OS=Homo sapiens GN=PFN1 PE=1 SV=2	P07737	PFN1	15054.3	4	4	5	STGGAPTFNVTVTK	K	T	0.997	49.6	26.7	16.1	49.6	0	1	0	0	2	1379.72	4652.61	6754750	92	105
Mudpit_Aged L3_4 Posterior NP IAF	Profilin-1 OS=Homo sapiens GN=PFN1 PE=1 SV=2	P07737	PFN1	15054.3	4	4	5	TFVNITPAEVGVLVGK	K	D	0.997	53	25	16.3	53	0	1	0	0	2	1643.94	9089.86	10652000	39	54
Mudpit_Aged L3_4 Posterior NP IAF	Inter-alpha-trypsin inhibitor heavy chain H3 OS=Homo sapiens GN=ITIH3 PE=1 SV=2	Q06033	ITIH3	99850.9	7	8	15	DFLGFYVVDSHR	R	M	0.951	36.2	26.4	15.3	36.2	0	0	1	0	2	1454.71	9245.25	8226140	790	801
Mudpit_Aged L3_4 Posterior NP IAF	Inter-alpha-trypsin inhibitor heavy chain H3 OS=Homo sapiens GN=ITIH3 PE=1 SV=2	Q06033	ITIH3	99850.9	7	8	15	DYIFGNYIER	R	L	0.971	25.9	25.3	14.6	25.9	0	1	0	0	2	1289.62	7473.5	41299600	547	556
Mudpit_Aged L3_4 Posterior NP IAF	Inter-alpha-trypsin inhibitor heavy chain H3 OS=Homo sapiens GN=ITIH3 PE=1 SV=2	Q06033	ITIH3	99850.9	7	8	15	EHLVQATPENLQEAR	K	T	0.997	71.9	26.7	17.5	71.9	0	4	0	0	2	1734.88	5140.6	24511900	334	348
Mudpit_Aged L3_4 Posterior NP IAF	Inter-alpha-trypsin inhibitor heavy chain H3 OS=Homo sapiens GN=ITIH3 PE=1 SV=2	Q06033	ITIH3	99850.9	7	8	15	EVSFDVELPK	K	T	0.997	58.8	27.5	16.7	58.8	0	1	0	0	2	1162.6	6939.12	25182300	76	85
Mudpit_Aged L3_4 Posterior NP IAF	Inter-alpha-trypsin inhibitor heavy chain H3 OS=Homo sapiens GN=ITIH3 PE=1 SV=2	Q06033	ITIH3	99850.9	7	8	15	GHGATNDLTFTEEVDMK	K	E	0.988	50.3	25	16.1	50.3	0	0	1	0	2	1864.84	7620.15	3895190	521	537
Mudpit_Aged L3_4 Posterior NP IAF	Inter-alpha-trypsin inhibitor heavy chain H3 OS=Homo sapiens GN=ITIH3 PE=1 SV=2	Q06033	ITIH3	99850.9	7	8	15	GMTNINDGLLR	K	G	0.997	42.5	26.6	15.7	42.5	0	3	0	0	2	1219.61	4066.61	38237000	358	368
Mudpit_Aged L3_4 Posterior NP IAF	Inter-alpha-trypsin inhibitor heavy chain H3 OS=Homo sapiens GN=ITIH3 PE=1 SV=2	Q06033	ITIH3	99850.9	7	8	15	LVDEDMNSFK	R	A	0.997	54.4	25	16.4	54.4	0	4	0	0	2	1197.55	3526.15	27187100	507	516
Mudpit_Aged L3_4 Posterior NP IAF	Prolow-density lipoprotein receptor-related protein 1 OS=Homo sapiens GN=LRP1 PE=1 SV=2	Q07954	LRP1	504592	9	10	10	AVTDEEPFLIFANR	K	Y	0.997	74.7	26.9	17.7	74.7	0	1	0	0	2	1621.82	9151.77	6352460	3023	3036
Mudpit_Aged L3_4 Posterior NP IAF	Prolow-density lipoprotein receptor-related protein 1 OS=Homo sapiens GN=LRP1 PE=1 SV=2	Q07954	LRP1	504592	9	10	10	EDYIEFASLDGSNR	R	H	0.997	66.9	25	17.2	66.9	0	1	0	0	2	1615.72	7490.07	3517370	3210	3223
Mudpit_Aged L3_4 Posterior NP IAF	Prolow-density lipoprotein receptor-related protein 1 OS=Homo sapiens GN=LRP1 PE=1 SV=2	Q07954	LRP1	504592	9	10	10	EYAGYLLYSER	R	T	0.997	35.4	25.3	15.2	35.4	0	1	0	0	2	1363.65	6462.04	8388940	2196	2206
Mudpit_Aged L3_4 Posterior NP IAF	Prolow-density lipoprotein receptor-related protein 1 OS=Homo sapiens GN=LRP1 PE=1 SV=2	Q07954	LRP1	504592	9	10	10	GDYSVLVPGLR	K	N	0.997	44.2	27.4	15.8	44.2	0	1	0	0	2	1175.64	7701.32	4114640	1287	1297
Mudpit_Aged L3_4 Posterior NP IAF	Prolow-density lipoprotein receptor-related protein 1 OS=Homo sapiens GN=LRP1 PE=1 SV=2	Q07954	LRP1	504592	9	10	10	GVGGAPPTVTLLR	R	S	0.995	35.3	25	15.2	35.3	0	1	0	0	2	1237.73	6428.55	4148670	771	783
Mudpit_Aged L3_4 Posterior NP IAF	Prolow-density lipoprotein receptor-related protein 1 OS=Homo sapiens GN=LRP1 PE=1 SV=2	Q07954	LRP1	504592	9	10	10	IDLETGENR	R	E	0.997	35.3	25.4	25.1	25.5	0	1	0	0	2	1046.51	2617.49	8930090	2079	2087
Mudpit_Aged L3_4 Posterior NP IAF	Prolow-density lipoprotein receptor-related protein 1 OS=Homo sapiens GN=LRP1 PE=1 SV=2	Q07954	LRP1	504592	9	10	10	TTLLAGDIEHPR	R	A	0.993	51.2	26.9	16.2	51.2	0	0	1	0	2	1322.71	5287.1	9567010	1379	1390
Mudpit_Aged L3_4 Posterior NP IAF	Prolow-density lipoprotein receptor-related protein 1 OS=Homo sapiens GN=LRP1 PE=1 SV=2	Q07954	LRP1	504592	9	10	10	VFFTDYGQIPK	K	V	0.98	33.8	26.5	15.1	33.8	0	1	0	0	2	1314.67	7458.8	5397720	337	347
Mudpit_Aged L3_4 Posterior NP IAF	Prolow-density lipoprotein receptor-related protein 1 OS=Homo sapiens GN=LRP1 PE=1 SV=2	Q07954	LRP1	504592	9	10	10	YVVISQGLDKPR	R	A	0.99	48.6	25.8	16	48.6	0	1	1	0	2	1374.77	5906.37	5222190	2000	2011
Mudpit_Aged L3_4 Posterior NP IAF	C-type lysozyme OS=Homo sapiens GN=LYZ PE=2 SV=1	B2R4C5,P61626	LYZ	16536.9	2	3	7	ATNYNAGDR	R	S	0.992	34.8	25	15.2	34.8	0	1	0	0	2	981.438	1337.27	231568	60	68
Mudpit_Aged L3_4 Posterior NP IAF	C-type lysozyme OS=Homo sapiens GN=LYZ PE=2 SV=1	B2R4C5,P61626	LYZ	16536.9	2	3	7	STDYGIFQINSR	R	Y	0.997	80.3	25	18	80.3	0	5	1	0	2	1400.68	7155.1	206529000	69	80
Mudpit_Aged L3_4 Posterior NP IAF	Collagen, type XI, alpha 1, isoform CRA_c OS=Homo sapiens GN=COL11A1 PE=4 SV=1	D3DT72	COL11A1	182420	6	8	12	AIVDTNGITVFGTR	R	I	0.997	60.5	25.8	16.8	60.5	0	1	0	0	2	1463.79	7456.17	4853270	196	209
Mudpit_Aged L3_4 Posterior NP IAF	Collagen, type XI, alpha 1, isoform CRA_c OS=Homo sapiens GN=COL11A1 PE=4 SV=1	D3DT72	COL11A1	182420	6	8	12	ALDFHNSPEGISK	K	T	0.997	63.2	25.7	16.9	63.2	0	1	0	0	2	1414.7	4238.34	2345690	44	56
Mudpit_Aged L3_4 Posterior NP IAF	Collagen, type XI, alpha 1, isoform CRA_c OS=Homo sapiens GN=COL11A1 PE=4 SV=1	D3DT72	COL11A1	182420	6	8	12	FLGSNDEEMSYDNNPFIK	R	T	0.997	70.8	25	17.4	70.8	0	2	0	0	2	2135.92	7865.65	5562750	1746	1763
Mudpit_Aged L3_4 Posterior NP IAF	Collagen, type XI, alpha 1, isoform CRA_c OS=Homo sapiens GN=COL11A1 PE=4 SV=1	D3DT72	COL11A1	182420	6	8	12	IDQVPIVDVMINDFGDQNQK	K	F	0.994	50.3	25.3	16.1	50.3	0	1	2	0	2	2304.12	8292.8	16743900	1787	1806
Mudpit_Aged L3_4 Posterior NP IAF	Collagen, type XI, alpha 1, isoform CRA_c OS=Homo sapiens GN=COL11A1 PE=4 SV=1	D3DT72	COL11A1	182420	6	8	12	ILDEEVFEGDIQQFLITGDPK	R	A	0.996	62.5	26.3	16.9	62.5	0	0	2	0	2	2406.21	9353.44	9740300	210	230
Mudpit_Aged L3_4 Posterior NP IAF	Collagen, type XI, alpha 1, isoform CRA_c OS=Homo sapiens GN=COL11A1 PE=4 SV=1	D3DT72	COL11A1	182420	6	8	12	TVIEINTPK	K	I	0.991	35.8	26.6	15.2	35.8	0	3	0	0	2	1014.58	3910.17	26801400	1778	1786
Mudpit_Aged L3_4 Posterior NP IAF	HCG1991735, isoform CRA_a OS=Homo sapiens GN=hCG_1991735 PE=4 SV=1	A0A024RC65,A4QPB0,P46940	IQGAP1,hCG_1991735	189259	5	5	5	ALESGDVNTVWK	R	Q	0.973	30.2	27.6	14.9	30.2	0	1	0	0	2	1318.66	5340.93	4902610	466	477
Mudpit_Aged L3_4 Posterior NP IAF	HCG1991735, isoform CRA_a OS=Homo sapiens GN=hCG_1991735 PE=4 SV=1	A0A024RC65,A4QPB0,P46940	IQGAP1,hCG_1991735	189259	5	5	5	EDSNLTLQEK	K	K	0.997	42.7	26.3	15.7	42.7	0	1	0	0	2	1176.57	2470.08	4081080	1446	1455
Mudpit_Aged L3_4 Posterior NP IAF	HCG1991735, isoform CRA_a OS=Homo sapiens GN=hCG_1991735 PE=4 SV=1	A0A024RC65,A4QPB0,P46940	IQGAP1,hCG_1991735	189259	5	5	5	EELQSGVDAANSAAQQYQR	K	R	0.997	115	25	20.2	115	0	1	0	0	2	2064.96	4926.83	1835230	369	387
Mudpit_Aged L3_4 Posterior NP IAF	HCG1991735, isoform CRA_a OS=Homo sapiens GN=hCG_1991735 PE=4 SV=1	A0A024RC65,A4QPB0,P46940	IQGAP1,hCG_1991735	189259	5	5	5	EEVITLIR	R	S	0.956	26.3	27	14.6	26.3	0	1	0	0	2	972.572	6036.8	5293060	894	901
Mudpit_Aged L3_4 Posterior NP IAF	HCG1991735, isoform CRA_a OS=Homo sapiens GN=hCG_1991735 PE=4 SV=1	A0A024RC65,A4QPB0,P46940	IQGAP1,hCG_1991735	189259	5	5	5	TALQEEIK	K	S	0.99	42.8	28.4	15.7	42.8	0	1	0	0	2	931.51	2733.79	4998720	1028	1035
Mudpit_Aged L3_4 Posterior NP IAF	Zymogen granule membrane protein 16 OS=Homo sapiens GN=ZG16 PE=1 SV=2	O60844	ZG16	18147.1	2	2	2	DSGTSFNAVPLHPNTVLR	K	F	0.958	36.4	26.7	15.3	36.4	0	0	1	0	2	1924.99	7756.23	3483360	123	140
Mudpit_Aged L3_4 Posterior NP IAF	Zymogen granule membrane protein 16 OS=Homo sapiens GN=ZG16 PE=1 SV=2	O60844	ZG16	18147.1	2	2	2	VWSDYVGGR	K	N	0.996	37.1	26.1	15.8	36.5	0	1	0	0	2	1038.5	3858.71	22771300	71	79
Mudpit_Aged L3_4 Posterior NP IAF	Alpha-1-acid glycoprotein 2 OS=Homo sapiens GN=ORM2 PE=1 SV=2	P19652	ORM2	23603.3	4	7	43	EHVAHLLFLR	R	D	0.991	48.8	25	16	48.8	0	0	6	0	2	1234.71	9313.88	135413000	114	123
Mudpit_Aged L3_4 Posterior NP IAF	Alpha-1-acid glycoprotein 2 OS=Homo sapiens GN=ORM2 PE=1 SV=2	P19652	ORM2	23603.3	4	7	43	NWGLSFYADKPETTK	K	E	0.997	60.9	26	16.8	60.9	0	2	1	0	2	1756.85	8346.93	50171900	139	153
Mudpit_Aged L3_4 Posterior NP IAF	Alpha-1-acid glycoprotein 2 OS=Homo sapiens GN=ORM2 PE=1 SV=2	P19652	ORM2	23603.3	4	7	43	SDVMYTDWK	R	K	0.997	75.9	25	17.7	75.9	0	12	0	0	2	1144.5	4332.76	131444000	171	179
Mudpit_Aged L3_4 Posterior NP IAF	Alpha-1-acid glycoprotein 2 OS=Homo sapiens GN=ORM2 PE=1 SV=2	P19652	ORM2	23603.3	4	7	43	TLMFGSYLDDEK	K	N	0.997	69.6	25	17.3	69.6	0	22	0	0	2	1418.65	7068.2	831250000	127	138
Mudpit_Aged L3_4 Posterior NP IAF	cDNA FLJ75066, highly similar to Homo sapiens complement component 1, r subcomponent (C1R), mRNA OS=Homo sapiens PE=2 SV=1	A8K5J8,B4DPQ0,P00736,Q53HT9,Q53HU9	C1R	80119.6	7	8	13	FCGQLGSPLGNPPGK	R	K	0.997	54.5	25.8	16.4	54.5	0	2	0	0	2	1529.74	5439.15	20120700	88	102
Mudpit_Aged L3_4 Posterior NP IAF	cDNA FLJ75066, highly similar to Homo sapiens complement component 1, r subcomponent (C1R), mRNA OS=Homo sapiens PE=2 SV=1	A8K5J8,B4DPQ0,P00736,Q53HT9,Q53HU9	C1R	80119.6	7	8	13	LPVANPQACENWLR	R	G	0.997	50.5	26.9	16.2	50.5	0	2	0	0	2	1668.82	7391.81	11106800	612	625
Mudpit_Aged L3_4 Posterior NP IAF	cDNA FLJ75066, highly similar to Homo sapiens complement component 1, r subcomponent (C1R), mRNA OS=Homo sapiens PE=2 SV=1	A8K5J8,B4DPQ0,P00736,Q53HT9,Q53HU9	C1R	80119.6	7	8	13	QRPPDLDTSSNAVDLLFFTDESGDSR	K	G	0.981	37.2	25	15.3	37.2	0	0	2	0	2	2882.34	9192.14	70139600	271	296
Mudpit_Aged L3_4 Posterior NP IAF	cDNA FLJ75066, highly similar to Homo sapiens complement component 1, r subcomponent (C1R), mRNA OS=Homo sapiens PE=2 SV=1	A8K5J8,B4DPQ0,P00736,Q53HT9,Q53HU9	C1R	80119.6	7	8	13	TLDEFTIIQNLQPQYQFR	K	D	0.997	57.8	30.5	16.6	57.8	0	1	0	0	2	2254.15	9203.19	13611200	314	331
Mudpit_Aged L3_4 Posterior NP IAF	cDNA FLJ75066, highly similar to Homo sapiens complement component 1, r subcomponent (C1R), mRNA OS=Homo sapiens PE=2 SV=1	A8K5J8,B4DPQ0,P00736,Q53HT9,Q53HU9	C1R	80119.6	7	8	13	VLNYVDWIK	K	K	0.997	42.5	26.7	15.7	42.5	0	1	0	0	2	1149.63	7834.48	15227700	690	698
Mudpit_Aged L3_4 Posterior NP IAF	cDNA FLJ75066, highly similar to Homo sapiens complement component 1, r subcomponent (C1R), mRNA OS=Homo sapiens PE=2 SV=1	A8K5J8,B4DPQ0,P00736,Q53HT9,Q53HU9	C1R	80119.6	7	8	13	WILTAAHTLYPK	R	E	0.991	47.8	27	16	0	0	0	1	0	2	1413.79	7485.85	5268840	496	507
Mudpit_Aged L3_4 Posterior NP IAF	cDNA FLJ75066, highly similar to Homo sapiens complement component 1, r subcomponent (C1R), mRNA OS=Homo sapiens PE=2 SV=1	A8K5J8,B4DPQ0,P00736,Q53HT9,Q53HU9	C1R	80119.6	7	8	13	YTTTMGVNTYK	R	A	0.997	60.8	25	16.8	60.8	0	4	0	0	2	1294.6	2301.77	10836000	389	399
Mudpit_Aged L3_4 Posterior NP IAF	IL17B protein OS=Homo sapiens GN=IL17B PE=2 SV=1	Q6IAG3,Q9UHF5	IL17B	20436.9	2	2	2	IPVDLPEAR	R	C	0.997	37.3	25	15.3	37.3	0	1	0	0	2	1009.57	4912.23	16311300	112	120
Mudpit_Aged L3_4 Posterior NP IAF	IL17B protein OS=Homo sapiens GN=IL17B PE=2 SV=1	Q6IAG3,Q9UHF5	IL17B	20436.9	2	2	2	SMVSVPVFSQVPVR	R	R	0.997	41.8	26.6	15.6	41.8	0	1	0	0	2	1531.83	8399.81	2430050	137	150
Mudpit_Aged L3_4 Posterior NP IAF	cDNA FLJ77877, highly similar to Human ENO2 neuron specific (gamma) enolase OS=Homo sapiens PE=2 SV=1	A8K3B0,P09104,Q6FHV6	ENO2	47269.7	2	2	2	IEEELGDEAR	R	F	0.988	33.9	25	31	18	0	1	0	0	2	1160.54	2563.49	12645300	413	422
Mudpit_Aged L3_4 Posterior NP IAF	cDNA FLJ77877, highly similar to Human ENO2 neuron specific (gamma) enolase OS=Homo sapiens PE=2 SV=1	A8K3B0,P09104,Q6FHV6	ENO2	47269.7	2	2	2	LDNLMLELDGTENK	K	S	0.997	51.1	27.1	20.7	46.6	0	1	0	0	2	1604.78	7813.12	2869780	90	103
Mudpit_Aged L3_4 Posterior NP IAF	Chondroadherin-like protein (Fragment) OS=Homo sapiens GN=CHADL PE=1 SV=1	H0Y4I5,Q6NUI6	CHADL	82391.1	3	3	3	ITEVSLGALGPAR	R	E	0.997	64.6	25	17	64.6	0	1	0	0	2	1283.73	6633.86	4014060	557	569
Mudpit_Aged L3_4 Posterior NP IAF	Chondroadherin-like protein (Fragment) OS=Homo sapiens GN=CHADL PE=1 SV=1	H0Y4I5,Q6NUI6	CHADL	82391.1	3	3	3	LAPGDLGR	R	T	0.985	30.1	25	31.4	13.6	0	1	0	0	2	798.447	2686.26	6086700	536	543
Mudpit_Aged L3_4 Posterior NP IAF	Chondroadherin-like protein (Fragment) OS=Homo sapiens GN=CHADL PE=1 SV=1	H0Y4I5,Q6NUI6	CHADL	82391.1	3	3	3	LGYLYLER	R	N	0.99	35.9	25	15.2	35.9	0	1	0	0	2	1026.56	6101.53	16337800	499	506
Mudpit_Aged L3_4 Posterior NP IAF	Apolipoprotein A-II OS=Homo sapiens GN=APOA2 PE=1 SV=1	P02652,V9GYM3	APOA2	11175.3	4	5	14	AGTELVNFLSYFVELGTQPATQ	K	-	0.997	77.6	25.8	17.9	77.6	0	0	1	0	2	2385.2	9582.39	5657350	79	100
Mudpit_Aged L3_4 Posterior NP IAF	Apolipoprotein A-II OS=Homo sapiens GN=APOA2 PE=1 SV=1	P02652,V9GYM3	APOA2	11175.3	4	5	14	EQLTPLIK	K	K	0.99	45.5	25	15.8	45.5	0	7	0	0	2	941.567	4878.22	1610940000	70	77
Mudpit_Aged L3_4 Posterior NP IAF	Apolipoprotein A-II OS=Homo sapiens GN=APOA2 PE=1 SV=1	P02652,V9GYM3	APOA2	11175.3	4	5	14	SPELQAEAK	K	S	0.997	64.7	25.6	17	64.7	0	2	0	0	2	972.5	1803.61	4524230	54	62
Mudpit_Aged L3_4 Posterior NP IAF	Apolipoprotein A-II OS=Homo sapiens GN=APOA2 PE=1 SV=1	P02652,V9GYM3	APOA2	11175.3	4	5	14	VKSPELQAEAK	K	S	0.997	65.9	27.2	17.1	65.9	0	1	3	0	2	1199.66	2822.5	17063900	52	62
Mudpit_Aged L3_4 Posterior NP IAF	Inter-alpha-trypsin inhibitor heavy chain H6 OS=Homo sapiens GN=ITIH6 PE=2 SV=1	Q6UXX5	ITIH6	143191	2	2	2	GLIGQFQHADIR	R	L	0.946	31.1	26.2	14.9	31.1	0	0	1	0	2	1354.72	8600.49	3330630	1241	1252
Mudpit_Aged L3_4 Posterior NP IAF	Inter-alpha-trypsin inhibitor heavy chain H6 OS=Homo sapiens GN=ITIH6 PE=2 SV=1	Q6UXX5	ITIH6	143191	2	2	2	LSWDQPALLK	R	R	0.997	45.4	25.1	15.8	45.4	0	1	0	0	2	1170.65	7649.37	4419340	1174	1183
Mudpit_Aged L3_4 Posterior NP IAF	Transforming growth factor beta-induced 68kDa isoform 1 (Fragment) OS=Homo sapiens GN=TGFBI PE=2 SV=1	A0A0S2Z4Q2,Q15582	TGFBI	74682.9	8	11	29	EGVYTVFAPTNEAFR	R	A	0.997	58.2	25.6	16.6	58.2	0	2	0	0	2	1700.83	8388.22	51549800	534	548
Mudpit_Aged L3_4 Posterior NP IAF	Transforming growth factor beta-induced 68kDa isoform 1 (Fragment) OS=Homo sapiens GN=TGFBI PE=2 SV=1	A0A0S2Z4Q2,Q15582	TGFBI	74682.9	8	11	29	GDELADSALEIFK	R	Q	0.997	76.2	26.2	17.8	76.2	0	1	0	0	2	1407.7	9068.24	31792000	643	655
Mudpit_Aged L3_4 Posterior NP IAF	Transforming growth factor beta-induced 68kDa isoform 1 (Fragment) OS=Homo sapiens GN=TGFBI PE=2 SV=1	A0A0S2Z4Q2,Q15582	TGFBI	74682.9	8	11	29	ILGDPEALR	R	D	0.997	60.5	25	30.2	47	0	4	0	0	2	983.552	4690.17	87990700	296	304
Mudpit_Aged L3_4 Posterior NP IAF	Transforming growth factor beta-induced 68kDa isoform 1 (Fragment) OS=Homo sapiens GN=TGFBI PE=2 SV=1	A0A0S2Z4Q2,Q15582	TGFBI	74682.9	8	11	29	SPYQLVLQHSR	K	L	0.994	55.7	26.6	16.5	0	0	0	3	0	2	1327.71	7410.5	12217700	28	38
Mudpit_Aged L3_4 Posterior NP IAF	Transforming growth factor beta-induced 68kDa isoform 1 (Fragment) OS=Homo sapiens GN=TGFBI PE=2 SV=1	A0A0S2Z4Q2,Q15582	TGFBI	74682.9	8	11	29	VISTITNNIQQIIEIEDTFETLR	K	A	0.997	91.5	25	18.7	91.5	0	1	0	0	2	2690.43	9538.91	3548560	235	257
Mudpit_Aged L3_4 Posterior NP IAF	Transforming growth factor beta-induced 68kDa isoform 1 (Fragment) OS=Homo sapiens GN=TGFBI PE=2 SV=1	A0A0S2Z4Q2,Q15582	TGFBI	74682.9	8	11	29	VLTPPMGTVMDVLK	R	G	0.997	70.2	25.7	17.4	70.2	0	9	0	0	2	1500.82	7988.15	124564000	497	510
Mudpit_Aged L3_4 Posterior NP IAF	Transforming growth factor beta-induced 68kDa isoform 1 (Fragment) OS=Homo sapiens GN=TGFBI PE=2 SV=1	A0A0S2Z4Q2,Q15582	TGFBI	74682.9	8	11	29	YGTLFTMDR	R	V	0.997	47.5	25	16	47.5	0	4	0	0	2	1119.51	5609.54	33502000	488	496
Mudpit_Aged L3_4 Posterior NP IAF	Transforming growth factor beta-induced 68kDa isoform 1 (Fragment) OS=Homo sapiens GN=TGFBI PE=2 SV=1	A0A0S2Z4Q2,Q15582	TGFBI	74682.9	8	11	29	YLYHGQTLETLGGK	K	K	0.997	62.5	26.8	20.7	58.7	0	2	3	0	2	1579.81	7663.18	46936100	448	461
Mudpit_Aged L3_4 Posterior NP IAF	cDNA, FLJ93149, highly similar to Homo sapiens frizzled-related protein (FRZB), mRNA OS=Homo sapiens PE=2 SV=1	B2R6W4,D9ZGF6,Q92765	FRZB	36254.6	3	3	3	LLLVEGSIAEK	R	W	0.996	39.6	25	15.5	39.6	0	1	0	0	2	1171.69	5970.46	9735840	267	277
Mudpit_Aged L3_4 Posterior NP IAF	cDNA, FLJ93149, highly similar to Homo sapiens frizzled-related protein (FRZB), mRNA OS=Homo sapiens PE=2 SV=1	B2R6W4,D9ZGF6,Q92765	FRZB	36254.6	3	3	3	NNYNYVIR	R	A	0.99	30.5	25	14.9	30.5	0	1	0	0	2	1055.53	3815.17	7446660	193	200
Mudpit_Aged L3_4 Posterior NP IAF	cDNA, FLJ93149, highly similar to Homo sapiens frizzled-related protein (FRZB), mRNA OS=Homo sapiens PE=2 SV=1	B2R6W4,D9ZGF6,Q92765	FRZB	36254.6	3	3	3	SSLVNIPR	K	D	0.981	28.5	26	14.8	28.5	0	1	0	0	2	885.515	4166.3	15879200	225	232
Mudpit_Aged L3_4 Posterior NP IAF	EGF containing fibulin-like extracellular matrix protein 1 isoform 2 (Fragment) OS=Homo sapiens GN=EFEMP1 PE=2 SV=1	A0A0S2Z3V1,A0A0S2Z4F1,A0A0U1RQV3,A8KAJ3,B4DWH0,Q12805,Q53TA7,Q59G97	EFEMP1	54639.1	2	2	3	QTSPVSAMLVLVK	R	S	0.997	54	25.9	16.4	54	0	1	0	0	2	1372.79	9105.24	15734100	441	453
Mudpit_Aged L3_4 Posterior NP IAF	EGF containing fibulin-like extracellular matrix protein 1 isoform 2 (Fragment) OS=Homo sapiens GN=EFEMP1 PE=2 SV=1	A0A0S2Z3V1,A0A0S2Z4F1,A0A0U1RQV3,A8KAJ3,B4DWH0,Q12805,Q53TA7,Q59G97	EFEMP1	54639.1	2	2	3	SVPSDIFQIQATTIYANTINTFR	R	I	0.984	49.7	25.7	16.1	49.7	0	0	2	0	2	2600.34	9368.12	17865100	405	427
Mudpit_Aged L3_4 Posterior NP IAF	Serine protease HTRA1 OS=Homo sapiens GN=HTRA1 PE=1 SV=1	Q92743	HTRA1	51287.3	11	17	97	DFPDVISGAYIIEVIPDTPAEAGGLK	R	E	0.997	97.1	26.2	19.1	97.1	0	2	2	0	2	2687.38	9440.73	70938600	404	429
Mudpit_Aged L3_4 Posterior NP IAF	Serine protease HTRA1 OS=Homo sapiens GN=HTRA1 PE=1 SV=1	Q92743	HTRA1	51287.3	11	17	97	ENDVIISINGQSVVSANDVSDVIK	K	R	0.997	96.6	26.3	19	96.6	0	1	0	0	2	2515.29	8930.56	7942340	430	453
Mudpit_Aged L3_4 Posterior NP IAF	Serine protease HTRA1 OS=Homo sapiens GN=HTRA1 PE=1 SV=1	Q92743	HTRA1	51287.3	11	17	97	ESTLNMVVR	R	R	0.997	92.8	27.2	22.8	88.9	0	15	0	0	2	1048.55	3066.6	112519000	455	463
Mudpit_Aged L3_4 Posterior NP IAF	Serine protease HTRA1 OS=Homo sapiens GN=HTRA1 PE=1 SV=1	Q92743	HTRA1	51287.3	11	17	97	GACGQGQEDPNSLR	R	H	0.997	46.3	25	15.9	46.3	0	3	0	0	2	1489.63	1948.32	15194800	153	166
Mudpit_Aged L3_4 Posterior NP IAF	Serine protease HTRA1 OS=Homo sapiens GN=HTRA1 PE=1 SV=1	Q92743	HTRA1	51287.3	11	17	97	IAPAVVHIELFR	K	K	0.991	42	25	15.6	42	0	2	3	0	2	1364.8	8608.42	502150000	179	190
Mudpit_Aged L3_4 Posterior NP IAF	Serine protease HTRA1 OS=Homo sapiens GN=HTRA1 PE=1 SV=1	Q92743	HTRA1	51287.3	11	17	97	LHRPPVIVLQR	R	G	0.989	44	25	15.7	44	0	0	2	0	2	1327.83	7192.78	44234500	142	152
Mudpit_Aged L3_4 Posterior NP IAF	Serine protease HTRA1 OS=Homo sapiens GN=HTRA1 PE=1 SV=1	Q92743	HTRA1	51287.3	11	17	97	LPVLLLGR	K	S	0.99	50.5	25	33.8	32.9	0	6	0	0	2	880.598	7372.09	827196000	262	269
Mudpit_Aged L3_4 Posterior NP IAF	Serine protease HTRA1 OS=Homo sapiens GN=HTRA1 PE=1 SV=1	Q92743	HTRA1	51287.3	11	17	97	RGNEDIMITVIPEEIDP	R	-	0.997	60.5	27.2	16.8	60.5	0	5	2	0	2	1956.96	9254.1	87978200	464	480
Mudpit_Aged L3_4 Posterior NP IAF	Serine protease HTRA1 OS=Homo sapiens GN=HTRA1 PE=1 SV=1	Q92743	HTRA1	51287.3	11	17	97	SSELRPGEFVVAIGSPFSLQNTVTTGIVSTTQR	R	G	0.997	117	25	20.3	117	0	0	21	10	2	3478.82	9721.93	129924000	270	302
Mudpit_Aged L3_4 Posterior NP IAF	Serine protease HTRA1 OS=Homo sapiens GN=HTRA1 PE=1 SV=1	Q92743	HTRA1	51287.3	11	17	97	VTAGISFAIPSDK	K	I	0.997	94.9	25.9	18.9	94.9	0	14	0	0	2	1305.7	6941.45	547707000	347	359
Mudpit_Aged L3_4 Posterior NP IAF	Serine protease HTRA1 OS=Homo sapiens GN=HTRA1 PE=1 SV=1	Q92743	HTRA1	51287.3	11	17	97	YNFIADVVEK	K	I	0.997	63.4	25.8	17	63.4	0	9	0	0	2	1197.62	7406.41	141646000	169	178
Mudpit_Aged L3_4 Posterior NP IAF	Superoxide dismutase [Cu-Zn] OS=Homo sapiens PE=2 SV=1	A0A140VJU8_HUMAN,B2R9V7,P08294	SOD3	25850.3	4	7	21	AGLAASLAGPHSIVGR	R	A	0.997	65.6	25.7	22.6	60.1	0	0	2	0	2	1476.83	6230.96	23953000	161	176
Mudpit_Aged L3_4 Posterior NP IAF	Superoxide dismutase [Cu-Zn] OS=Homo sapiens PE=2 SV=1	A0A140VJU8_HUMAN,B2R9V7,P08294	SOD3	25850.3	4	7	21	AVVVHAGEDDLGR	R	G	0.992	49.3	25.3	16.1	49.3	0	1	5	0	2	1337.68	3849.77	92017800	177	189
Mudpit_Aged L3_4 Posterior NP IAF	Superoxide dismutase [Cu-Zn] OS=Homo sapiens PE=2 SV=1	A0A140VJU8_HUMAN,B2R9V7,P08294	SOD3	25850.3	4	7	21	VTEIWQEVMQR	K	R	0.997	78.7	25.7	17.9	78.7	0	8	2	0	2	1418.71	7412.36	101554000	42	52
Mudpit_Aged L3_4 Posterior NP IAF	Superoxide dismutase [Cu-Zn] OS=Homo sapiens PE=2 SV=1	A0A140VJU8_HUMAN,B2R9V7,P08294	SOD3	25850.3	4	7	21	VTGVVLFR	R	Q	0.99	44.2	25	15.8	44.2	0	3	0	0	2	890.546	5960.98	29070900	78	85
Mudpit_Aged L3_4 Posterior NP IAF	Beta-hexosaminidase OS=Homo sapiens PE=2 SV=1	B4DVA7,Q9BVJ8	HEXA	47095.3	2	2	3	IQPDTIIQVWR	K	E	0.997	39.3	25.1	15.5	39.3	0	2	0	0	2	1368.76	8679.97	6803890	263	273
Mudpit_Aged L3_4 Posterior NP IAF	Beta-hexosaminidase OS=Homo sapiens PE=2 SV=1	B4DVA7,Q9BVJ8	HEXA	47095.3	2	2	3	LTSDLTFAYER	K	L	0.997	41.9	27.6	15.6	41.9	0	1	0	0	2	1315.65	5987.01	14434400	369	379
Mudpit_Aged L3_4 Posterior NP IAF	Periostin, osteoblast specific factor, isoform CRA_c OS=Homo sapiens GN=POSTN PE=4 SV=1	A0A024RDS2,Q15063	POSTN	93318	10	10	12	AAAITSDILEALGR	R	D	0.997	77.7	27.8	19.1	76.4	0	2	0	0	2	1400.77	9229.06	77762900	252	265
Mudpit_Aged L3_4 Posterior NP IAF	Periostin, osteoblast specific factor, isoform CRA_c OS=Homo sapiens GN=POSTN PE=4 SV=1	A0A024RDS2,Q15063	POSTN	93318	10	10	12	ELLTQPGDWTLFVPTNDAFK	K	G	0.988	36.1	26.3	15.3	36.1	0	1	0	0	2	2292.16	9344.21	7297460	523	542
Mudpit_Aged L3_4 Posterior NP IAF	Periostin, osteoblast specific factor, isoform CRA_c OS=Homo sapiens GN=POSTN PE=4 SV=1	A0A024RDS2,Q15063	POSTN	93318	10	10	12	FSTFLSLLEAADLK	R	E	0.997	89.3	25.9	18.6	89.3	0	1	0	0	2	1554.84	9430.6	5636640	509	522
Mudpit_Aged L3_4 Posterior NP IAF	Periostin, osteoblast specific factor, isoform CRA_c OS=Homo sapiens GN=POSTN PE=4 SV=1	A0A024RDS2,Q15063	POSTN	93318	10	10	12	GFEPGVTNILK	K	T	0.982	31.7	27.7	15	31.7	0	1	0	0	2	1174.65	7315.18	6136220	576	586
Mudpit_Aged L3_4 Posterior NP IAF	Periostin, osteoblast specific factor, isoform CRA_c OS=Homo sapiens GN=POSTN PE=4 SV=1	A0A024RDS2,Q15063	POSTN	93318	10	10	12	IITGPEIK	R	Y	0.947	26.9	25	15.7	25.9	0	1	0	0	2	870.53	3325.62	6849060	754	761
Mudpit_Aged L3_4 Posterior NP IAF	Periostin, osteoblast specific factor, isoform CRA_c OS=Homo sapiens GN=POSTN PE=4 SV=1	A0A024RDS2,Q15063	POSTN	93318	10	10	12	ISTGGGETEETLK	R	K	0.997	50.7	25.9	16.2	50.7	0	1	0	0	2	1321.65	2285.11	6448960	765	777
Mudpit_Aged L3_4 Posterior NP IAF	Periostin, osteoblast specific factor, isoform CRA_c OS=Homo sapiens GN=POSTN PE=4 SV=1	A0A024RDS2,Q15063	POSTN	93318	10	10	12	LLQEEVTK	K	V	0.99	41.7	28	24.6	32.7	0	2	0	0	2	959.541	2433.7	14832200	779	786
Mudpit_Aged L3_4 Posterior NP IAF	Periostin, osteoblast specific factor, isoform CRA_c OS=Homo sapiens GN=POSTN PE=4 SV=1	A0A024RDS2,Q15063	POSTN	93318	10	10	12	LLYPADTPVGNDQLLEILNK	K	L	0.997	79.1	26.2	17.9	79.1	0	1	0	0	2	2226.2	9219.31	8143620	627	646
Mudpit_Aged L3_4 Posterior NP IAF	Periostin, osteoblast specific factor, isoform CRA_c OS=Homo sapiens GN=POSTN PE=4 SV=1	A0A024RDS2,Q15063	POSTN	93318	10	10	12	QVIELAGK	K	Q	0.99	66.2	27.1	32.2	51.1	0	1	0	0	2	857.509	3061.25	7879370	372	379
Mudpit_Aged L3_4 Posterior NP IAF	Periostin, osteoblast specific factor, isoform CRA_c OS=Homo sapiens GN=POSTN PE=4 SV=1	A0A024RDS2,Q15063	POSTN	93318	10	10	12	VIEGSLQPIIK	K	T	0.997	46	25	15.9	46	0	1	0	0	2	1196.73	6297.51	7279690	684	694
Mudpit_Aged L3_4 Posterior NP IAF	14-3-3 protein beta/alpha OS=Homo sapiens GN=YWHAB PE=1 SV=3	P31946,V9HWD6	HEL-S-1,YWHAB	28083.1	2	3	3	AVTEQGHELSNEER	K	N	0.964	37.8	29.9	15.4	37.8	0	0	1	0	2	1598.74	2153.12	8659340	30	43
Mudpit_Aged L3_4 Posterior NP IAF	14-3-3 protein beta/alpha OS=Homo sapiens GN=YWHAB PE=1 SV=3	P31946,V9HWD6	HEL-S-1,YWHAB	28083.1	2	3	3	TAFDEAIAELDTLNEESYK	K	D	0.997	89.5	25.4	20.4	87.7	0	1	1	0	2	2159	9239.92	12903500	196	214
Mudpit_Aged L3_4 Posterior NP IAF	Matrix-remodeling-associated protein 5 OS=Homo sapiens GN=MXRA5 PE=2 SV=3	Q9NR99	MXRA5	312150	15	17	33	EEGDYTCFAENQVGK	R	D	0.985	39.2	25	15.4	39.2	0	2	0	0	2	1747.71	5040.91	2917130	2318	2332
Mudpit_Aged L3_4 Posterior NP IAF	Matrix-remodeling-associated protein 5 OS=Homo sapiens GN=MXRA5 PE=2 SV=3	Q9NR99	MXRA5	312150	15	17	33	FSILSSGWLR	K	I	0.997	57.1	25.8	16.6	57.1	0	2	0	0	2	1165.64	8990.14	29939900	532	541
Mudpit_Aged L3_4 Posterior NP IAF	Matrix-remodeling-associated protein 5 OS=Homo sapiens GN=MXRA5 PE=2 SV=3	Q9NR99	MXRA5	312150	15	17	33	GTPAPQISWIFPDR	K	R	0.997	74.9	28.4	17.7	74.9	0	1	0	0	2	1584.82	9094.61	35928900	1976	1989
Mudpit_Aged L3_4 Posterior NP IAF	Matrix-remodeling-associated protein 5 OS=Homo sapiens GN=MXRA5 PE=2 SV=3	Q9NR99	MXRA5	312150	15	17	33	LIAYYSEVPVK	K	L	0.997	46.1	25.4	15.9	46.1	0	2	0	0	2	1281.71	6221.81	28633800	380	390
Mudpit_Aged L3_4 Posterior NP IAF	Matrix-remodeling-associated protein 5 OS=Homo sapiens GN=MXRA5 PE=2 SV=3	Q9NR99	MXRA5	312150	15	17	33	MIDALFSFDSR	R	I	0.997	45.5	25	15.8	45.5	0	2	0	0	2	1317.61	8528.2	8613170	2187	2197
Mudpit_Aged L3_4 Posterior NP IAF	Matrix-remodeling-associated protein 5 OS=Homo sapiens GN=MXRA5 PE=2 SV=3	Q9NR99	MXRA5	312150	15	17	33	QDADEEALYYTGVR	R	A	0.997	82.3	25	18.1	82.3	0	3	0	0	2	1629.74	6089.51	15227900	409	422
Mudpit_Aged L3_4 Posterior NP IAF	Matrix-remodeling-associated protein 5 OS=Homo sapiens GN=MXRA5 PE=2 SV=3	Q9NR99	MXRA5	312150	15	17	33	SIEEEQEQEEDGGSQLILEK	R	F	0.997	106	25	19.6	106	0	5	1	0	2	2290.06	5762.02	12426200	291	310
Mudpit_Aged L3_4 Posterior NP IAF	Matrix-remodeling-associated protein 5 OS=Homo sapiens GN=MXRA5 PE=2 SV=3	Q9NR99	MXRA5	312150	15	17	33	SLASVPAGIAK	R	H	0.984	27.6	25	14.7	27.6	0	1	0	0	2	1013.6	4141.37	13526800	45	55
Mudpit_Aged L3_4 Posterior NP IAF	Matrix-remodeling-associated protein 5 OS=Homo sapiens GN=MXRA5 PE=2 SV=3	Q9NR99	MXRA5	312150	15	17	33	VGDDYVVLK	K	V	0.994	40.4	26.1	15.5	40.4	0	3	0	0	2	1007.54	4781.69	20812700	2227	2235
Mudpit_Aged L3_4 Posterior NP IAF	Matrix-remodeling-associated protein 5 OS=Homo sapiens GN=MXRA5 PE=2 SV=3	Q9NR99	MXRA5	312150	15	17	33	VITGQTLQGLSNLMR	R	L	0.997	52.3	26.8	16.3	52.3	0	1	0	0	2	1630.89	8304.5	5555840	117	131
Mudpit_Aged L3_4 Posterior NP IAF	Matrix-remodeling-associated protein 5 OS=Homo sapiens GN=MXRA5 PE=2 SV=3	Q9NR99	MXRA5	312150	15	17	33	VLVQSPSTQPAEK	R	D	0.996	37.4	25.8	15.3	37.4	0	2	0	0	2	1383.75	2556.88	4115080	570	582
Mudpit_Aged L3_4 Posterior NP IAF	Matrix-remodeling-associated protein 5 OS=Homo sapiens GN=MXRA5 PE=2 SV=3	Q9NR99	MXRA5	312150	15	17	33	VQVSDSGYYR	K	C	0.997	75.3	25	17.7	75.3	0	3	0	0	2	1173.55	2766.94	21907500	641	650
Mudpit_Aged L3_4 Posterior NP IAF	Matrix-remodeling-associated protein 5 OS=Homo sapiens GN=MXRA5 PE=2 SV=3	Q9NR99	MXRA5	312150	15	17	33	VVTAPATIR	K	N	0.997	44	25	15.7	44	0	1	0	0	2	927.562	2735.43	5887260	2341	2349
Mudpit_Aged L3_4 Posterior NP IAF	Matrix-remodeling-associated protein 5 OS=Homo sapiens GN=MXRA5 PE=2 SV=3	Q9NR99	MXRA5	312150	15	17	33	VWQTVSPVEGR	R	I	0.991	32.4	26.9	15	32.4	0	1	0	0	2	1257.66	5041.55	4055460	1991	2001
Mudpit_Aged L3_4 Posterior NP IAF	Matrix-remodeling-associated protein 5 OS=Homo sapiens GN=MXRA5 PE=2 SV=3	Q9NR99	MXRA5	312150	15	17	33	YQIYQDGTLLIQK	K	A	0.997	44.2	26.2	15.8	44.2	0	3	0	0	2	1582.85	7356.6	8652730	2395	2407
Mudpit_Aged L3_4 Posterior NP IAF	cDNA, FLJ96197, highly similar to Homo sapiens connective tissue growth factor (CTGF), mRNA OS=Homo sapiens PE=2 SV=1	B2RCP7,B3KRV6,B3KWK5,P29279,Q5M8T4,Q6FHL8	CTGF	38090.7	2	2	3	LEDTFGPDPTMIR	R	A	0.997	43.6	25.2	15.7	43.6	0	1	0	0	2	1491.72	6699.67	4220150	184	196
Mudpit_Aged L3_4 Posterior NP IAF	cDNA, FLJ96197, highly similar to Homo sapiens connective tissue growth factor (CTGF), mRNA OS=Homo sapiens PE=2 SV=1	B2RCP7,B3KRV6,B3KWK5,P29279,Q5M8T4,Q6FHL8	CTGF	38090.7	2	2	3	TTTLPVEFK	R	C	0.997	47.4	28.3	16	47.4	0	2	0	0	2	1035.57	5597.49	19046800	298	306
Mudpit_Aged L3_4 Posterior NP IAF	Collagen alpha-1(VII) chain OS=Homo sapiens GN=COL7A1 PE=1 SV=2	Q02388	COL7A1	295218	4	4	4	FATVQYSDDPR	R	T	0.997	39.5	25.9	15.5	39.5	0	1	0	0	2	1298.6	3640.32	5309940	79	89
Mudpit_Aged L3_4 Posterior NP IAF	Collagen alpha-1(VII) chain OS=Homo sapiens GN=COL7A1 PE=1 SV=2	Q02388	COL7A1	295218	4	4	4	QEVNVPAGETSVR	R	L	0.996	37	26.3	15.3	37	0	1	0	0	2	1385.7	3051.09	5389360	281	293
Mudpit_Aged L3_4 Posterior NP IAF	Collagen alpha-1(VII) chain OS=Homo sapiens GN=COL7A1 PE=1 SV=2	Q02388	COL7A1	295218	4	4	4	VLSGGPTQQQELGPGQGSVLLR	R	D	0.978	35.6	25	15.2	35.6	0	0	1	0	2	2221.19	6638.99	2910010	362	383
Mudpit_Aged L3_4 Posterior NP IAF	Collagen alpha-1(VII) chain OS=Homo sapiens GN=COL7A1 PE=1 SV=2	Q02388	COL7A1	295218	4	4	4	VQYTPLTGLGQPLPSER	K	Q	0.997	83.6	26	18.2	83.6	0	1	0	0	2	1855.99	7801.92	2004450	264	280
Mudpit_Aged L3_4 Posterior NP IAF	Keratin, type I cytoskeletal 9 OS=Homo sapiens GN=KRT9 PE=1 SV=3	P35527	KRT9	62065.9	4	4	5	GGGGSFGYSYGGGSGGGFSASSLGGGFGGGSR	R	G	0.997	146	25	22.1	146	0	1	0	0	2	2705.16	7481.24	3759730	64	95
Mudpit_Aged L3_4 Posterior NP IAF	Keratin, type I cytoskeletal 9 OS=Homo sapiens GN=KRT9 PE=1 SV=3	P35527	KRT9	62065.9	4	4	5	GGSGGSHGGGSGFGGESGGSYGGGEEASGSGGGYGGGSGK	R	S	0.997	134	25	21.4	134	0	0	1	0	2	3223.28	2990.7	1970760	580	619
Mudpit_Aged L3_4 Posterior NP IAF	Keratin, type I cytoskeletal 9 OS=Homo sapiens GN=KRT9 PE=1 SV=3	P35527	KRT9	62065.9	4	4	5	GGSGGSYGGGSGSGGGSGGGYGGGSGGGHSGGSGGGHSGGSGGNYGGGSGSGGGSGGGYGGGSGSR	R	G	0.983	46.2	25	15.9	46.2	0	0	0	2	2	4972.94	2645.7	1721770	514	579
Mudpit_Aged L3_4 Posterior NP IAF	Keratin, type I cytoskeletal 9 OS=Homo sapiens GN=KRT9 PE=1 SV=3	P35527	KRT9	62065.9	4	4	5	QGVDADINGLR	R	Q	0.997	55.9	25.2	16.5	55.9	0	1	0	0	2	1157.59	4108.64	15930000	251	261
Mudpit_Aged L3_4 Posterior NP IAF	Stromelysin-1 OS=Homo sapiens GN=MMP3 PE=1 SV=2	P08254	MMP3	53979.1	4	4	4	FLGLEVTGK	K	L	0.952	26.5	25.3	14.7	26.5	0	1	0	0	2	963.551	6629.38	4146890	70	78
Mudpit_Aged L3_4 Posterior NP IAF	Stromelysin-1 OS=Homo sapiens GN=MMP3 PE=1 SV=2	P08254	MMP3	53979.1	4	4	4	LDSDTLEVMR	K	K	0.997	64.7	25.6	17	64.7	0	1	0	0	2	1178.57	5333.32	9822740	79	88
Mudpit_Aged L3_4 Posterior NP IAF	Stromelysin-1 OS=Homo sapiens GN=MMP3 PE=1 SV=2	P08254	MMP3	53979.1	4	4	4	VWEEVTPLTFSR	K	L	0.958	35.3	29.4	19.4	31.1	0	1	0	0	2	1463.75	8156.9	5299610	140	151
Mudpit_Aged L3_4 Posterior NP IAF	Stromelysin-1 OS=Homo sapiens GN=MMP3 PE=1 SV=2	P08254	MMP3	53979.1	4	4	4	YLENYYDLK	K	K	0.996	37.4	25.7	15.3	37.4	0	1	0	0	2	1220.58	5774.47	6434410	37	45
Mudpit_Aged L3_4 Posterior NP IAF	Matrix metallopeptidase 2 (Gelatinase A, 72kDa gelatinase, 72kDa type IV collagenase), isoform CRA_a OS=Homo sapiens GN=MMP2 PE=4 SV=1	A0A024R6R4,P08253	MMP2	73885.1	4	4	5	AFQVWSDVTPLR	R	F	0.997	51.7	27.6	16.2	51.7	0	1	0	0	2	1418.74	8447.62	10096300	147	158
Mudpit_Aged L3_4 Posterior NP IAF	Matrix metallopeptidase 2 (Gelatinase A, 72kDa gelatinase, 72kDa type IV collagenase), isoform CRA_a OS=Homo sapiens GN=MMP2 PE=4 SV=1	A0A024R6R4,P08253	MMP2	73885.1	4	4	5	FFGLPQTGDLDQNTIETMR	K	K	0.997	42.8	25	15.7	42.8	0	1	0	0	2	2199.04	8522.8	1175020	80	98
Mudpit_Aged L3_4 Posterior NP IAF	Matrix metallopeptidase 2 (Gelatinase A, 72kDa gelatinase, 72kDa type IV collagenase), isoform CRA_a OS=Homo sapiens GN=MMP2 PE=4 SV=1	A0A024R6R4,P08253	MMP2	73885.1	4	4	5	IDAVYEAPQEEK	K	A	0.997	47.6	25	16	47.6	0	1	0	0	2	1391.67	3831.23	2281450	520	531
Mudpit_Aged L3_4 Posterior NP IAF	Matrix metallopeptidase 2 (Gelatinase A, 72kDa gelatinase, 72kDa type IV collagenase), isoform CRA_a OS=Homo sapiens GN=MMP2 PE=4 SV=1	A0A024R6R4,P08253	MMP2	73885.1	4	4	5	IIGYTPDLDPETVDDAFAR	R	A	0.997	82.3	26.3	18.1	82.3	0	2	0	0	2	2108.02	8860.44	12011400	128	146
Mudpit_Aged L3_4 Posterior NP IAF	Coagulation factor V OS=Homo sapiens GN=F5 PE=1 SV=1	A0A0A0MRJ7,P12259	F5	251710	4	4	7	AVQPGETYTYK	R	W	0.997	47.7	25	16	47.7	0	2	0	0	2	1256.62	2684.16	8870100	474	484
Mudpit_Aged L3_4 Posterior NP IAF	Coagulation factor V OS=Homo sapiens GN=F5 PE=1 SV=1	A0A0A0MRJ7,P12259	F5	251710	4	4	7	DPDNIAAWYLR	R	S	0.988	31.6	25.8	15	31.6	0	1	0	0	2	1333.65	8034.53	3719350	1563	1573
Mudpit_Aged L3_4 Posterior NP IAF	Coagulation factor V OS=Homo sapiens GN=F5 PE=1 SV=1	A0A0A0MRJ7,P12259	F5	251710	4	4	7	ETDIEDSDDIPEDTTYK	R	K	0.997	50.6	25	16.2	50.6	0	3	0	0	2	1985.84	5226.89	6175520	1600	1616
Mudpit_Aged L3_4 Posterior NP IAF	Coagulation factor V OS=Homo sapiens GN=F5 PE=1 SV=1	A0A0A0MRJ7,P12259	F5	251710	4	4	7	EVIITGIQTQGAK	K	H	0.995	32.6	25	15	32.6	0	1	0	0	2	1357.77	4848.87	10296000	1970	1982
Mudpit_Aged L3_4 Posterior NP IAF	Heat shock protein 90kDa alpha (Cytosolic), class B member 1, isoform CRA_a OS=Homo sapiens GN=HSP90AB1 PE=3 SV=1	A0A024RD80,B4DMA2,P08238	HSP90AB1	83267.3	2	2	2	EQVANSAFVER	K	V	0.997	51.6	29.2	16.2	51.6	0	1	0	0	2	1249.62	3251.67	2876610	492	502
Mudpit_Aged L3_4 Posterior NP IAF	Heat shock protein 90kDa alpha (Cytosolic), class B member 1, isoform CRA_a OS=Homo sapiens GN=HSP90AB1 PE=3 SV=1	A0A024RD80,B4DMA2,P08238	HSP90AB1	83267.3	2	2	2	NPDDITQEEYGEFYK	R	S	0.997	82.4	25	18.2	82.4	0	1	0	0	2	1847.8	6475.84	3153970	292	306
Mudpit_Aged L3_4 Posterior NP IAF	Immunoglobulin J chain (Fragment) OS=Homo sapiens GN=JCHAIN PE=1 SV=1	C9JA05,D6RD17,D6RHJ6,P01591	JCHAIN	18098.5	2	2	7	IIVPLNNR	R	E	0.99	44	25	21.3	38.4	0	3	0	0	2	938.578	4264.78	35058500	62	69
Mudpit_Aged L3_4 Posterior NP IAF	Immunoglobulin J chain (Fragment) OS=Homo sapiens GN=JCHAIN PE=1 SV=1	C9JA05,D6RD17,D6RHJ6,P01591	JCHAIN	18098.5	2	2	7	SSEDPNEDIVER	R	N	0.997	80.1	25	18	80.1	0	4	0	0	2	1389.61	2676.45	120850000	47	58
Mudpit_Aged L3_4 Posterior NP IAF	Adseverin OS=Homo sapiens GN=SCIN PE=1 SV=4	Q9Y6U3	SCIN	80490.2	3	3	3	GAEYVASVLK	K	C	0.996	38	26.7	15.4	38	0	1	0	0	2	1036.57	4850.6	6419080	565	574
Mudpit_Aged L3_4 Posterior NP IAF	Adseverin OS=Homo sapiens GN=SCIN PE=1 SV=4	Q9Y6U3	SCIN	80490.2	3	3	3	SELIVVEEGSEPSELIK	R	V	0.997	40.7	26.1	15.5	40.7	0	1	0	0	2	1857.97	7835.22	5867500	206	222
Mudpit_Aged L3_4 Posterior NP IAF	Adseverin OS=Homo sapiens GN=SCIN PE=1 SV=4	Q9Y6U3	SCIN	80490.2	3	3	3	SLGGQAVQIR	R	V	0.997	40	25.5	15.5	40	0	1	0	0	2	1028.58	3235.41	7086960	463	472
Mudpit_Aged L3_4 Posterior NP IAF	Lymphocyte cytosolic protein 1 (L-plastin), isoform CRA_a OS=Homo sapiens GN=LCP1 PE=4 SV=1	A0A024RDT4,P13796,Q53FI1,V9HWJ7	HEL-S-37,LCP1	70291.2	5	5	8	FSLVGIGGQDLNEGNR	K	T	0.997	49.9	26.8	16.1	49.9	0	1	0	0	2	1675.84	7674.89	4176620	473	488
Mudpit_Aged L3_4 Posterior NP IAF	Lymphocyte cytosolic protein 1 (L-plastin), isoform CRA_a OS=Homo sapiens GN=LCP1 PE=4 SV=1	A0A024RDT4,P13796,Q53FI1,V9HWJ7	HEL-S-37,LCP1	70291.2	5	5	8	ISFDEFIK	R	I	0.964	25.9	25	14.6	25.9	0	2	0	0	2	998.519	8495.04	5550460	69	76
Mudpit_Aged L3_4 Posterior NP IAF	Lymphocyte cytosolic protein 1 (L-plastin), isoform CRA_a OS=Homo sapiens GN=LCP1 PE=4 SV=1	A0A024RDT4,P13796,Q53FI1,V9HWJ7	HEL-S-37,LCP1	70291.2	5	5	8	LSPEELLLR	K	W	0.997	53.2	25	18.2	51.4	0	2	0	0	2	1069.63	8026.4	11631900	264	272
Mudpit_Aged L3_4 Posterior NP IAF	Lymphocyte cytosolic protein 1 (L-plastin), isoform CRA_a OS=Homo sapiens GN=LCP1 PE=4 SV=1	A0A024RDT4,P13796,Q53FI1,V9HWJ7	HEL-S-37,LCP1	70291.2	5	5	8	NEALIALLR	R	E	0.973	26.6	25	14.7	26.6	0	1	0	0	2	1012.62	8566.37	3814690	245	253
Mudpit_Aged L3_4 Posterior NP IAF	Lymphocyte cytosolic protein 1 (L-plastin), isoform CRA_a OS=Homo sapiens GN=LCP1 PE=4 SV=1	A0A024RDT4,P13796,Q53FI1,V9HWJ7	HEL-S-37,LCP1	70291.2	5	5	8	VYALPEDLVEVNPK	R	M	0.997	50.3	27	16.1	50.3	0	2	0	0	2	1585.85	7978.61	13565200	597	610
Mudpit_Aged L3_4 Posterior NP IAF	Histone H2B OS=Homo sapiens GN=HIST1H2BJ PE=3 SV=1	A0A024RCJ2,P06899,P23527,P33778,Q16778	HIST1H2BB,HIST1H2BJ,HIST1H2BO,HIST2H2BE	13950.8	2	3	3	AMGIMNSFVNDIFER	K	I	0.997	104	25	19.5	53.8	0	2	0	0	2	1759.81	9327.19	22760600	59	73
Mudpit_Aged L3_4 Posterior NP IAF	Histone H2B OS=Homo sapiens GN=HIST1H2BJ PE=3 SV=1	A0A024RCJ2,P06899,P23527,P33778,Q16778	HIST1H2BB,HIST1H2BJ,HIST1H2BO,HIST2H2BE	13950.8	2	3	3	LLLPGELAK	R	H	0.966	25	25	27	1.28	0	1	0	0	2	953.603	6604.53	3569800	101	109
Mudpit_Aged L3_4 Posterior NP IAF	Tenascin OS=Homo sapiens GN=TNC PE=1 SV=3	P24821	TNC	240850	27	31	47	APTAQVESFR	R	I	0.997	57.8	27	30.7	43.7	0	1	0	0	2	1105.56	3132.27	16647800	1732	1741
Mudpit_Aged L3_4 Posterior NP IAF	Tenascin OS=Homo sapiens GN=TNC PE=1 SV=3	P24821	TNC	240850	27	31	47	ASVTGYLLVYESVDGTVK	R	E	0.997	43.5	26.3	15.7	43.5	0	2	0	0	2	1900.99	9705.23	1313300	1912	1929
Mudpit_Aged L3_4 Posterior NP IAF	Tenascin OS=Homo sapiens GN=TNC PE=1 SV=3	P24821	TNC	240850	27	31	47	AVDIPGLEAATPYR	R	V	0.997	39.9	27	15.5	39.9	0	1	0	0	2	1472.77	7056.89	17104500	1401	1414
Mudpit_Aged L3_4 Posterior NP IAF	Tenascin OS=Homo sapiens GN=TNC PE=1 SV=3	P24821	TNC	240850	27	31	47	AYAAGFGDR	K	R	0.993	33.8	25	15.1	33.8	0	1	0	0	2	927.432	2738.11	5029210	2042	2050
Mudpit_Aged L3_4 Posterior NP IAF	Tenascin OS=Homo sapiens GN=TNC PE=1 SV=3	P24821	TNC	240850	27	31	47	DHGETAFAVYDK	R	F	0.997	61.5	25	16.8	61.5	0	4	0	0	2	1352.61	4745.84	23522800	2078	2089
Mudpit_Aged L3_4 Posterior NP IAF	Tenascin OS=Homo sapiens GN=TNC PE=1 SV=3	P24821	TNC	240850	27	31	47	EDKESNPATINAATELDTPK	K	D	0.997	116	27	20.3	116	0	2	1	0	2	2144.04	5471.03	14235200	970	989
Mudpit_Aged L3_4 Posterior NP IAF	Tenascin OS=Homo sapiens GN=TNC PE=1 SV=3	P24821	TNC	240850	27	31	47	EEFWLGLDNLNK	R	I	0.997	39.5	27.3	15.5	39.5	0	2	0	0	2	1477.73	9025.32	17244700	2052	2063
Mudpit_Aged L3_4 Posterior NP IAF	Tenascin OS=Homo sapiens GN=TNC PE=1 SV=3	P24821	TNC	240850	27	31	47	ENFYQNWK	R	A	0.99	32.2	25	15	32.2	0	1	0	0	2	1128.51	4873.64	9531720	2034	2041
Mudpit_Aged L3_4 Posterior NP IAF	Tenascin OS=Homo sapiens GN=TNC PE=1 SV=3	P24821	TNC	240850	27	31	47	ESNPATINAATELDTPK	K	D	0.997	103	26.7	19.5	103	0	1	0	0	2	1771.87	5291.64	2758180	973	989
Mudpit_Aged L3_4 Posterior NP IAF	Tenascin OS=Homo sapiens GN=TNC PE=1 SV=3	P24821	TNC	240850	27	31	47	ETFTTGLDAPR	K	N	0.997	48	27.3	16	48	0	2	0	0	2	1207.6	4622.3	17194500	887	897
Mudpit_Aged L3_4 Posterior NP IAF	Tenascin OS=Homo sapiens GN=TNC PE=1 SV=3	P24821	TNC	240850	27	31	47	EVIVGPDTTSYSLADLSPSTHYTAK	K	I	0.997	99.5	26.2	19.2	99.5	0	1	1	0	2	2652.3	7667.6	10360800	1930	1954
Mudpit_Aged L3_4 Posterior NP IAF	Tenascin OS=Homo sapiens GN=TNC PE=1 SV=3	P24821	TNC	240850	27	31	47	FTTDLDSPR	K	D	0.97	28.9	26.4	14.8	28.9	0	1	0	0	2	1051.51	3474.41	14719300	1883	1891
Mudpit_Aged L3_4 Posterior NP IAF	Tenascin OS=Homo sapiens GN=TNC PE=1 SV=3	P24821	TNC	240850	27	31	47	GLEPGQEYNVLLTAEK	R	G	0.997	89.3	26.8	18.6	89.3	0	4	0	0	2	1760.91	7583.38	22652800	1042	1057
Mudpit_Aged L3_4 Posterior NP IAF	Tenascin OS=Homo sapiens GN=TNC PE=1 SV=3	P24821	TNC	240850	27	31	47	ITAQGQYELR	K	V	0.997	65.3	27.6	17.1	65.3	0	3	0	0	2	1178.62	3138.64	20839200	2064	2073
Mudpit_Aged L3_4 Posterior NP IAF	Tenascin OS=Homo sapiens GN=TNC PE=1 SV=3	P24821	TNC	240850	27	31	47	ITYVPITGGTPSMVTVDGTK	R	T	0.997	75.3	27	17.7	75.3	0	2	0	0	2	2037.06	7224.38	3983570	1742	1761
Mudpit_Aged L3_4 Posterior NP IAF	Tenascin OS=Homo sapiens GN=TNC PE=1 SV=3	P24821	TNC	240850	27	31	47	LDAPSQIEVK	R	D	0.997	63.8	26.3	21	59.8	0	2	0	0	2	1099.6	4056.22	12521700	803	812
Mudpit_Aged L3_4 Posterior NP IAF	Tenascin OS=Homo sapiens GN=TNC PE=1 SV=3	P24821	TNC	240850	27	31	47	LEELENLVSSLR	R	E	0.997	72.4	27.3	21.8	68.1	0	1	0	0	2	1401.76	9093.87	58606900	126	137
Mudpit_Aged L3_4 Posterior NP IAF	Tenascin OS=Homo sapiens GN=TNC PE=1 SV=3	P24821	TNC	240850	27	31	47	LLDPQEFTLSGTQR	K	K	0.997	58.8	28.8	16.7	58.8	0	1	0	0	2	1604.83	7594.53	1838390	1569	1582
Mudpit_Aged L3_4 Posterior NP IAF	Tenascin OS=Homo sapiens GN=TNC PE=1 SV=3	P24821	TNC	240850	27	31	47	QSEPLEITLLAPER	K	T	0.997	116	25.8	20.3	116	0	1	0	0	2	1595.86	8510.26	10850700	1660	1673
Mudpit_Aged L3_4 Posterior NP IAF	Tenascin OS=Homo sapiens GN=TNC PE=1 SV=3	P24821	TNC	240850	27	31	47	QTGLAPGQEYEISLHIVK	R	N	0.992	47.4	26.5	16	47.4	0	0	1	0	2	1983.05	7523.13	12096100	770	787
Mudpit_Aged L3_4 Posterior NP IAF	Tenascin OS=Homo sapiens GN=TNC PE=1 SV=3	P24821	TNC	240850	27	31	47	STDLPGLK	R	A	0.99	37.6	26.9	16.7	36.2	0	1	0	0	2	830.462	3532.71	8438630	1219	1226
Mudpit_Aged L3_4 Posterior NP IAF	Tenascin OS=Homo sapiens GN=TNC PE=1 SV=3	P24821	TNC	240850	27	31	47	TPVLSAEASTAK	R	E	0.997	70	27.6	17.4	70	0	3	0	0	2	1174.63	2663.06	11205400	1426	1437
Mudpit_Aged L3_4 Posterior NP IAF	Tenascin OS=Homo sapiens GN=TNC PE=1 SV=3	P24821	TNC	240850	27	31	47	TVSGNTVEYALTDLEPATEYTLR	R	I	0.997	121	26.1	20.6	121	0	1	1	0	2	2543.25	9056.7	19559800	1844	1866
Mudpit_Aged L3_4 Posterior NP IAF	Tenascin OS=Homo sapiens GN=TNC PE=1 SV=3	P24821	TNC	240850	27	31	47	VATYLPAPEGLK	R	F	0.997	46.3	27.1	15.9	46.3	0	1	0	0	2	1258.7	5728.67	10198500	708	719
Mudpit_Aged L3_4 Posterior NP IAF	Tenascin OS=Homo sapiens GN=TNC PE=1 SV=3	P24821	TNC	240850	27	31	47	VFAILENK	R	K	0.99	44.5	29	15.8	44.5	0	1	0	0	2	933.54	5802.4	11993200	692	699
Mudpit_Aged L3_4 Posterior NP IAF	Tenascin OS=Homo sapiens GN=TNC PE=1 SV=3	P24821	TNC	240850	27	31	47	VPGDQTSTIIQELEPGVEYFIR	R	V	0.982	48.4	26.5	16	48.4	0	0	1	0	2	2491.27	9467.83	9791350	670	691
Mudpit_Aged L3_4 Posterior NP IAF	Tenascin OS=Homo sapiens GN=TNC PE=1 SV=3	P24821	TNC	240850	27	31	47	VSQTDNSITLEWR	R	N	0.997	90.8	27.6	18.7	90.8	0	2	0	0	2	1548.77	6087.45	33439800	902	914
Mudpit_Aged L3_4 Posterior NP IAF	Prolargin OS=Homo sapiens GN=PRELP PE=1 SV=1	P51888,Q6FHG6	PRELP	43812.4	13	23	124	IETIPNGYFK	K	S	0.996	36.7	28	15.3	36.7	0	2	0	0	2	1181.62	5713.26	32215500	254	263
Mudpit_Aged L3_4 Posterior NP IAF	Prolargin OS=Homo sapiens GN=PRELP PE=1 SV=1	P51888,Q6FHG6	PRELP	43812.4	13	23	124	IPPGVFSK	R	L	0.99	48.2	28.9	26.3	38	0	10	0	0	2	844.493	3918.58	580444000	186	193
Mudpit_Aged L3_4 Posterior NP IAF	Prolargin OS=Homo sapiens GN=PRELP PE=1 SV=1	P51888,Q6FHG6	PRELP	43812.4	13	23	124	ISSVPAINNR	R	L	0.997	51.1	25	16.2	51.1	0	5	0	0	2	1070.6	3008.46	127589000	303	312
Mudpit_Aged L3_4 Posterior NP IAF	Prolargin OS=Homo sapiens GN=PRELP PE=1 SV=1	P51888,Q6FHG6	PRELP	43812.4	13	23	124	KVPVIPPR	R	I	0.99	37.9	25	15.4	37.9	0	7	0	0	2	905.593	4186.23	42867500	96	103
Mudpit_Aged L3_4 Posterior NP IAF	Prolargin OS=Homo sapiens GN=PRELP PE=1 SV=1	P51888,Q6FHG6	PRELP	43812.4	13	23	124	LEHLYLNNNSIEK	R	I	0.997	73.4	26.7	20.3	70.7	0	10	6	0	2	1586.82	5809.38	449855000	313	325
Mudpit_Aged L3_4 Posterior NP IAF	Prolargin OS=Homo sapiens GN=PRELP PE=1 SV=1	P51888,Q6FHG6	PRELP	43812.4	13	23	124	LENLLLLDLQHNR	K	L	0.997	57.8	25	16.6	57.8	0	4	4	0	2	1590.9	9205.37	174251000	194	206
Mudpit_Aged L3_4 Posterior NP IAF	Prolargin OS=Homo sapiens GN=PRELP PE=1 SV=1	P51888,Q6FHG6	PRELP	43812.4	13	23	124	LPGLVFLYMEK	K	N	0.997	64.9	26.3	17.1	64.9	0	5	0	0	2	1309.72	8914.28	307457000	149	159
Mudpit_Aged L3_4 Posterior NP IAF	Prolargin OS=Homo sapiens GN=PRELP PE=1 SV=1	P51888,Q6FHG6	PRELP	43812.4	13	23	124	LSDGVFKPDTFHGLK	R	N	0.997	68.2	26.7	17.3	68.2	0	3	1	8	2	1660.87	9080.55	143783000	207	221
Mudpit_Aged L3_4 Posterior NP IAF	Prolargin OS=Homo sapiens GN=PRELP PE=1 SV=1	P51888,Q6FHG6	PRELP	43812.4	13	23	124	NLMQLNLAHNILR	K	K	0.997	99.8	25	19.2	99.8	0	4	3	0	2	1549.86	8158.55	179792000	222	234
Mudpit_Aged L3_4 Posterior NP IAF	Prolargin OS=Homo sapiens GN=PRELP PE=1 SV=1	P51888,Q6FHG6	PRELP	43812.4	13	23	124	NQLEEVPSALPR	K	N	0.997	64.2	28.3	19.7	61.5	0	11	1	0	2	1352.72	5554.84	1282000000	160	171
Mudpit_Aged L3_4 Posterior NP IAF	Prolargin OS=Homo sapiens GN=PRELP PE=1 SV=1	P51888,Q6FHG6	PRELP	43812.4	13	23	124	SFPNLAFIR	K	L	0.997	43.7	26.2	15.7	43.7	0	3	0	0	2	1064.59	8079.58	366491000	264	272
Mudpit_Aged L3_4 Posterior NP IAF	Prolargin OS=Homo sapiens GN=PRELP PE=1 SV=1	P51888,Q6FHG6	PRELP	43812.4	13	23	124	VPTAIHQLYLDSNK	R	I	0.997	114	26.5	20.1	114	0	12	16	0	2	1598.85	7325.88	1147240000	240	253
Mudpit_Aged L3_4 Posterior NP IAF	Prolargin OS=Homo sapiens GN=PRELP PE=1 SV=1	P51888,Q6FHG6	PRELP	43812.4	13	23	124	WINLDNNR	R	I	0.99	37	25	15.3	37	0	9	0	0	2	1044.52	5091.75	644982000	130	137
Mudpit_Aged L3_4 Posterior NP IAF	Selenoprotein P (Fragment) OS=Homo sapiens GN=SELENOP PE=1 SV=1	A0A182DWH7_HUMAN,P49908	SEPP1	43173.7	5	5	11	DDFLIYDR	K	C	0.962	26.9	25	14.7	26.9	0	2	0	0	2	1056.5	6727.49	15279100	132	139
Mudpit_Aged L3_4 Posterior NP IAF	Selenoprotein P (Fragment) OS=Homo sapiens GN=SELENOP PE=1 SV=1	A0A182DWH7_HUMAN,P49908	SEPP1	43173.7	5	5	11	DMPASEDLQDLQK	R	K	0.997	65.5	25	17.1	65.5	0	1	0	0	2	1489.68	5591.71	5436770	262	274
Mudpit_Aged L3_4 Posterior NP IAF	Selenoprotein P (Fragment) OS=Homo sapiens GN=SELENOP PE=1 SV=1	A0A182DWH7_HUMAN,P49908	SEPP1	43173.7	5	5	11	LPTDSELAPR	K	S	0.997	46	26.2	15.9	46	0	4	0	0	2	1098.58	3769.18	25705700	289	298
Mudpit_Aged L3_4 Posterior NP IAF	Selenoprotein P (Fragment) OS=Homo sapiens GN=SELENOP PE=1 SV=1	A0A182DWH7_HUMAN,P49908	SEPP1	43173.7	5	5	11	QPPAWSIR	K	D	0.99	34.1	26	15.1	34.1	0	1	0	0	2	954.516	5260.22	8201200	30	37
Mudpit_Aged L3_4 Posterior NP IAF	Selenoprotein P (Fragment) OS=Homo sapiens GN=SELENOP PE=1 SV=1	A0A182DWH7_HUMAN,P49908	SEPP1	43173.7	5	5	11	VSLATVDK	R	T	0.99	67.7	26.4	22.7	62.2	0	3	0	0	2	832.477	2704.37	19391600	189	196
Mudpit_Aged L3_4 Posterior NP IAF	Extracellular serine/threonine protein kinase FAM20C OS=Homo sapiens GN=FAM20C PE=1 SV=2	Q8IXL6	FAM20C	66236.4	2	2	2	EQETPPDFFYFSDYER	R	H	0.997	85.9	25	18.4	85.9	0	1	0	0	2	2069.88	9077.88	12704600	292	307
Mudpit_Aged L3_4 Posterior NP IAF	Extracellular serine/threonine protein kinase FAM20C OS=Homo sapiens GN=FAM20C PE=1 SV=2	Q8IXL6	FAM20C	66236.4	2	2	2	LSLLMAESLR	K	G	0.997	56.9	25.4	21.3	52.2	0	1	0	0	2	1132.64	8034.73	4935630	521	530
Mudpit_Aged L3_4 Posterior NP IAF	Glutathione peroxidase OS=Homo sapiens GN=GPX3 PE=1 SV=1	A0A087X1J7,P22352	GPX3	25553.2	4	5	8	FLVGPDGIPIMR	K	W	0.997	63.6	26.8	35.8	44.8	0	4	0	0	2	1314.72	8548.15	48095600	186	197
Mudpit_Aged L3_4 Posterior NP IAF	Glutathione peroxidase OS=Homo sapiens GN=GPX3 PE=1 SV=1	A0A087X1J7,P22352	GPX3	25553.2	4	5	8	MDILSYMR	K	R	0.99	41	25	15.6	41	0	1	0	0	2	1028.49	8220.82	2639170	209	216
Mudpit_Aged L3_4 Posterior NP IAF	Glutathione peroxidase OS=Homo sapiens GN=GPX3 PE=1 SV=1	A0A087X1J7,P22352	GPX3	25553.2	4	5	8	NSCPPTSELLGTSDR	K	L	0.997	61.5	25	16.8	61.5	0	2	0	0	2	1634.73	5555.9	10969000	154	168
Mudpit_Aged L3_4 Posterior NP IAF	Glutathione peroxidase OS=Homo sapiens GN=GPX3 PE=1 SV=1	A0A087X1J7,P22352	GPX3	25553.2	4	5	8	QEPGENSEILPTLK	K	Y	0.997	43	26.6	15.7	43	0	1	0	0	2	1554.8	6032.25	5089460	107	120
Mudpit_Aged L3_4 Posterior NP IAF	Milk fat globule-EGF factor 8 protein, isoform CRA_a OS=Homo sapiens GN=MFGE8 PE=4 SV=1	A0A024RC55,Q08431	MFGE8	43122.9	11	16	65	AGMVNAWTPSSNDDNPWIQVNLLR	R	R	0.997	104	25.6	19.5	104	0	2	1	0	2	2698.3	9176.45	18158500	111	134
Mudpit_Aged L3_4 Posterior NP IAF	Milk fat globule-EGF factor 8 protein, isoform CRA_a OS=Homo sapiens GN=MFGE8 PE=4 SV=1	A0A024RC55,Q08431	MFGE8	43122.9	11	16	65	CVEPLGMENGNIANSQIAASSVR	K	V	0.997	49.1	25	16.1	49.1	0	2	0	0	2	2434.13	5960.87	8815490	70	92
Mudpit_Aged L3_4 Posterior NP IAF	Milk fat globule-EGF factor 8 protein, isoform CRA_a OS=Homo sapiens GN=MFGE8 PE=4 SV=1	A0A024RC55,Q08431	MFGE8	43122.9	11	16	65	EFVGNWNK	K	N	0.99	43	25	15.7	43	0	2	0	0	2	993.479	4340.92	28357700	181	188
Mudpit_Aged L3_4 Posterior NP IAF	Milk fat globule-EGF factor 8 protein, isoform CRA_a OS=Homo sapiens GN=MFGE8 PE=4 SV=1	A0A024RC55,Q08431	MFGE8	43122.9	11	16	65	EVTGIITQGAR	K	N	0.997	55.6	27.2	16.5	55.6	0	4	0	0	2	1144.63	3756.05	600389000	298	308
Mudpit_Aged L3_4 Posterior NP IAF	Milk fat globule-EGF factor 8 protein, isoform CRA_a OS=Homo sapiens GN=MFGE8 PE=4 SV=1	A0A024RC55,Q08431	MFGE8	43122.9	11	16	65	ILPVAWHNR	R	I	0.994	37	25.7	15.3	37	0	1	1	0	2	1105.63	4891.43	100630000	369	377
Mudpit_Aged L3_4 Posterior NP IAF	Milk fat globule-EGF factor 8 protein, isoform CRA_a OS=Homo sapiens GN=MFGE8 PE=4 SV=1	A0A024RC55,Q08431	MFGE8	43122.9	11	16	65	MWVTGVVTQGASR	R	L	0.997	57.3	25.9	16.9	57	0	1	0	0	2	1407.7	5362.85	7370790	136	148
Mudpit_Aged L3_4 Posterior NP IAF	Milk fat globule-EGF factor 8 protein, isoform CRA_a OS=Homo sapiens GN=MFGE8 PE=4 SV=1	A0A024RC55,Q08431	MFGE8	43122.9	11	16	65	NAVHVNLFETPVEAQYVR	K	L	0.997	67	26.6	17.2	67	0	1	1	0	2	2086.07	9242.62	58937100	189	206
Mudpit_Aged L3_4 Posterior NP IAF	Milk fat globule-EGF factor 8 protein, isoform CRA_a OS=Homo sapiens GN=MFGE8 PE=4 SV=1	A0A024RC55,Q08431	MFGE8	43122.9	11	16	65	NFGSVQFVASYK	R	V	0.997	56.8	27.1	16.5	56.8	0	4	0	0	2	1346.67	6583	44154200	309	320
Mudpit_Aged L3_4 Posterior NP IAF	Milk fat globule-EGF factor 8 protein, isoform CRA_a OS=Homo sapiens GN=MFGE8 PE=4 SV=1	A0A024RC55,Q08431	MFGE8	43122.9	11	16	65	NLFETPILAR	K	Y	0.996	37.8	27.1	19.5	33.6	0	2	0	0	2	1173.66	8124.21	49321200	356	365
Mudpit_Aged L3_4 Posterior NP IAF	Milk fat globule-EGF factor 8 protein, isoform CRA_a OS=Homo sapiens GN=MFGE8 PE=4 SV=1	A0A024RC55,Q08431	MFGE8	43122.9	11	16	65	QITASSSYK	K	T	0.997	35.6	25	15.3	35.5	0	1	0	0	2	984.5	1808.61	398449	245	253
Mudpit_Aged L3_4 Posterior NP IAF	Milk fat globule-EGF factor 8 protein, isoform CRA_a OS=Homo sapiens GN=MFGE8 PE=4 SV=1	A0A024RC55,Q08431	MFGE8	43122.9	11	16	65	VTFLGLQHWVPELAR	R	L	0.997	89.2	25	18.6	89.2	0	18	24	0	2	1765.97	9999.6	146542000	93	107
Mudpit_Aged L3_4 Posterior NP IAF	Serum amyloid P-component OS=Homo sapiens GN=APCS PE=1 SV=2	P02743,V9HWP0	APCS,HEL-S-92n	25387.7	6	6	44	AYSLFSYNTQGR	R	D	0.997	57.8	25	16.6	57.8	0	7	0	0	2	1406.67	6100.19	72966300	65	76
Mudpit_Aged L3_4 Posterior NP IAF	Serum amyloid P-component OS=Homo sapiens GN=APCS PE=1 SV=2	P02743,V9HWP0	APCS,HEL-S-92n	25387.7	6	6	44	DNELLVYK	R	E	0.99	54.2	27.7	16.4	54.2	0	6	0	0	2	993.525	5153.92	270569000	77	84
Mudpit_Aged L3_4 Posterior NP IAF	Serum amyloid P-component OS=Homo sapiens GN=APCS PE=1 SV=2	P02743,V9HWP0	APCS,HEL-S-92n	25387.7	6	6	44	GYVIIKPLVWV	R	-	0.988	28.8	25	14.8	28.8	0	1	0	0	2	1286.79	9228.27	21266300	213	223
Mudpit_Aged L3_4 Posterior NP IAF	Serum amyloid P-component OS=Homo sapiens GN=APCS PE=1 SV=2	P02743,V9HWP0	APCS,HEL-S-92n	25387.7	6	6	44	IVLGQEQDSYGGK	K	F	0.997	98.1	27.1	19.1	98.1	0	17	0	0	2	1393.7	3513.9	854614000	150	162
Mudpit_Aged L3_4 Posterior NP IAF	Serum amyloid P-component OS=Homo sapiens GN=APCS PE=1 SV=2	P02743,V9HWP0	APCS,HEL-S-92n	25387.7	6	6	44	QGYFVEAQPK	R	I	0.997	67.8	25.6	17.2	67.8	0	7	0	0	2	1166.58	3850.84	128204000	140	149
Mudpit_Aged L3_4 Posterior NP IAF	Serum amyloid P-component OS=Homo sapiens GN=APCS PE=1 SV=2	P02743,V9HWP0	APCS,HEL-S-92n	25387.7	6	6	44	VGEYSLYIGR	R	H	0.997	60.7	26	16.8	60.7	0	6	0	0	2	1156.6	5976.42	751206000	87	96
Mudpit_Aged L3_4 Posterior NP IAF	Inter-alpha (Globulin) inhibitor H4 (Plasma Kallikrein-sensitive glycoprotein) OS=Homo sapiens GN=ITIH4 PE=2 SV=1	B2RMS9	ITIH4	103363	25	38	147	AEAQAQYSAAVAK	K	G	0.997	78.6	26.9	17.9	78.6	0	10	3	0	2	1307.66	2202.07	157419000	99	111
Mudpit_Aged L3_4 Posterior NP IAF	Inter-alpha (Globulin) inhibitor H4 (Plasma Kallikrein-sensitive glycoprotein) OS=Homo sapiens GN=ITIH4 PE=2 SV=1	B2RMS9	ITIH4	103363	25	38	147	AGFSWIEVTFK	K	N	0.997	67	25.7	17.2	67	0	2	0	0	2	1284.66	9169.02	64678800	778	788
Mudpit_Aged L3_4 Posterior NP IAF	Inter-alpha (Globulin) inhibitor H4 (Plasma Kallikrein-sensitive glycoprotein) OS=Homo sapiens GN=ITIH4 PE=2 SV=1	B2RMS9	ITIH4	103363	25	38	147	ANTVQEATFQMELPK	R	K	0.997	101	26.4	19.3	101	0	17	6	0	2	1722.84	6731.54	314053000	61	75
Mudpit_Aged L3_4 Posterior NP IAF	Inter-alpha (Globulin) inhibitor H4 (Plasma Kallikrein-sensitive glycoprotein) OS=Homo sapiens GN=ITIH4 PE=2 SV=1	B2RMS9	ITIH4	103363	25	38	147	ETLFSVMPGLK	K	M	0.997	60.8	27.8	16.8	60.8	0	8	0	0	2	1221.65	7090.61	219260000	816	826
Mudpit_Aged L3_4 Posterior NP IAF	Inter-alpha (Globulin) inhibitor H4 (Plasma Kallikrein-sensitive glycoprotein) OS=Homo sapiens GN=ITIH4 PE=2 SV=1	B2RMS9	ITIH4	103363	25	38	147	FSSHVGGTLGQFYQEVLWGSPAASDDGR	R	R	0.982	57.5	25	16.6	57.5	0	0	1	0	2	2968.39	9341.2	11320200	867	894
Mudpit_Aged L3_4 Posterior NP IAF	Inter-alpha (Globulin) inhibitor H4 (Plasma Kallikrein-sensitive glycoprotein) OS=Homo sapiens GN=ITIH4 PE=2 SV=1	B2RMS9	ITIH4	103363	25	38	147	FSSHVGGTLGQFYQEVLWGSPAASDDGRR	R	T	0.995	50.6	25.6	16.2	50.6	0	0	1	6	2	3124.49	9671.1	20191800	867	895
Mudpit_Aged L3_4 Posterior NP IAF	Inter-alpha (Globulin) inhibitor H4 (Plasma Kallikrein-sensitive glycoprotein) OS=Homo sapiens GN=ITIH4 PE=2 SV=1	B2RMS9	ITIH4	103363	25	38	147	GPDVLTATVSGK	R	L	0.997	64.3	27.1	17	64.3	0	9	0	0	2	1144.62	4369.56	583308000	501	512
Mudpit_Aged L3_4 Posterior NP IAF	Inter-alpha (Globulin) inhibitor H4 (Plasma Kallikrein-sensitive glycoprotein) OS=Homo sapiens GN=ITIH4 PE=2 SV=1	B2RMS9	ITIH4	103363	25	38	147	GSEMVVAGK	K	L	0.997	58.7	26.8	16.7	58.7	0	1	0	0	2	877.445	1893.14	932883	488	496
Mudpit_Aged L3_4 Posterior NP IAF	Inter-alpha (Globulin) inhibitor H4 (Plasma Kallikrein-sensitive glycoprotein) OS=Homo sapiens GN=ITIH4 PE=2 SV=1	B2RMS9	ITIH4	103363	25	38	147	ILDDLSPR	K	D	0.99	53	25.1	23.6	45.7	0	12	0	0	2	928.51	4294.46	128789000	300	307
Mudpit_Aged L3_4 Posterior NP IAF	Inter-alpha (Globulin) inhibitor H4 (Plasma Kallikrein-sensitive glycoprotein) OS=Homo sapiens GN=ITIH4 PE=2 SV=1	B2RMS9	ITIH4	103363	25	38	147	IPKPEASFSPR	K	R	0.993	56.4	25.5	16.5	56.4	0	0	1	0	2	1228.67	5851.88	3646680	634	644
Mudpit_Aged L3_4 Posterior NP IAF	Inter-alpha (Globulin) inhibitor H4 (Plasma Kallikrein-sensitive glycoprotein) OS=Homo sapiens GN=ITIH4 PE=2 SV=1	B2RMS9	ITIH4	103363	25	38	147	ITFELVYEELLK	K	R	0.996	46.5	25	15.9	46.5	0	1	0	0	2	1496.82	9501.83	5123540	140	151
Mudpit_Aged L3_4 Posterior NP IAF	Inter-alpha (Globulin) inhibitor H4 (Plasma Kallikrein-sensitive glycoprotein) OS=Homo sapiens GN=ITIH4 PE=2 SV=1	B2RMS9	ITIH4	103363	25	38	147	LALDNGGLAR	K	R	0.997	74.3	25	25.2	66.8	0	2	0	0	2	999.558	3991.46	103485000	429	438
Mudpit_Aged L3_4 Posterior NP IAF	Inter-alpha (Globulin) inhibitor H4 (Plasma Kallikrein-sensitive glycoprotein) OS=Homo sapiens GN=ITIH4 PE=2 SV=1	B2RMS9	ITIH4	103363	25	38	147	LGVYELLLK	R	V	0.997	69.7	25	18.7	68.3	0	4	0	0	2	1047.64	9024.99	155712000	154	162
Mudpit_Aged L3_4 Posterior NP IAF	Inter-alpha (Globulin) inhibitor H4 (Plasma Kallikrein-sensitive glycoprotein) OS=Homo sapiens GN=ITIH4 PE=2 SV=1	B2RMS9	ITIH4	103363	25	38	147	LPEGSVSLIILLTDGDPTVGETNPR	R	S	0.974	48	25.5	16	48	0	0	1	0	2	2593.37	9494.88	3288780	372	396
Mudpit_Aged L3_4 Posterior NP IAF	Inter-alpha (Globulin) inhibitor H4 (Plasma Kallikrein-sensitive glycoprotein) OS=Homo sapiens GN=ITIH4 PE=2 SV=1	B2RMS9	ITIH4	103363	25	38	147	LQDRGPDVLTATVSGK	K	L	0.997	55.9	26.1	16.5	55.9	0	1	0	0	2	1656.89	4889.9	5122000	497	512
Mudpit_Aged L3_4 Posterior NP IAF	Inter-alpha (Globulin) inhibitor H4 (Plasma Kallikrein-sensitive glycoprotein) OS=Homo sapiens GN=ITIH4 PE=2 SV=1	B2RMS9	ITIH4	103363	25	38	147	NMEQFQVSVSVAPNAK	R	I	0.997	90.9	26	18.7	90.9	0	12	1	0	2	1764.86	5847.35	44846100	124	139
Mudpit_Aged L3_4 Posterior NP IAF	Inter-alpha (Globulin) inhibitor H4 (Plasma Kallikrein-sensitive glycoprotein) OS=Homo sapiens GN=ITIH4 PE=2 SV=1	B2RMS9	ITIH4	103363	25	38	147	NPLVWVHASPEHVVVTR	K	N	0.997	72.4	25.4	17.5	72.4	0	2	5	4	2	1940.05	8316.8	233615000	789	805
Mudpit_Aged L3_4 Posterior NP IAF	Inter-alpha (Globulin) inhibitor H4 (Plasma Kallikrein-sensitive glycoprotein) OS=Homo sapiens GN=ITIH4 PE=2 SV=1	B2RMS9	ITIH4	103363	25	38	147	NVVFVIDK	K	S	0.99	40.7	29	15.5	40.7	0	4	0	0	2	933.54	5538.13	110685000	274	281
Mudpit_Aged L3_4 Posterior NP IAF	Inter-alpha (Globulin) inhibitor H4 (Plasma Kallikrein-sensitive glycoprotein) OS=Homo sapiens GN=ITIH4 PE=2 SV=1	B2RMS9	ITIH4	103363	25	38	147	QGPVNLLSDPEQGVEVTGQYER	R	E	0.997	95.2	26.1	19	95.2	0	4	3	0	2	2415.18	7763.93	143893000	754	775
Mudpit_Aged L3_4 Posterior NP IAF	Inter-alpha (Globulin) inhibitor H4 (Plasma Kallikrein-sensitive glycoprotein) OS=Homo sapiens GN=ITIH4 PE=2 SV=1	B2RMS9	ITIH4	103363	25	38	147	QLGLPGPPDVPDHAAYHPFR	R	R	0.986	44.2	26.4	15.8	44.2	0	0	2	1	2	2184.1	9229.31	73870800	669	688
Mudpit_Aged L3_4 Posterior NP IAF	Inter-alpha (Globulin) inhibitor H4 (Plasma Kallikrein-sensitive glycoprotein) OS=Homo sapiens GN=ITIH4 PE=2 SV=1	B2RMS9	ITIH4	103363	25	38	147	SPEQQETVLDGNLIIR	K	Y	0.997	92.7	26.4	18.8	92.7	0	10	4	0	2	1811.95	7302.26	255066000	225	240
Mudpit_Aged L3_4 Posterior NP IAF	Inter-alpha (Globulin) inhibitor H4 (Plasma Kallikrein-sensitive glycoprotein) OS=Homo sapiens GN=ITIH4 PE=2 SV=1	B2RMS9	ITIH4	103363	25	38	147	TGLLLLSDPDK	K	V	0.997	70	27	36.9	50.5	0	6	0	0	2	1171.66	7189.31	129683000	832	842
Mudpit_Aged L3_4 Posterior NP IAF	Inter-alpha (Globulin) inhibitor H4 (Plasma Kallikrein-sensitive glycoprotein) OS=Homo sapiens GN=ITIH4 PE=2 SV=1	B2RMS9	ITIH4	103363	25	38	147	VRPQQLVK	K	H	0.989	29.4	25	20.1	24.1	0	1	0	0	2	967.605	5199.8	2481140	163	170
Mudpit_Aged L3_4 Posterior NP IAF	Inter-alpha (Globulin) inhibitor H4 (Plasma Kallikrein-sensitive glycoprotein) OS=Homo sapiens GN=ITIH4 PE=2 SV=1	B2RMS9	ITIH4	103363	25	38	147	VTIGLLFWDGR	K	G	0.997	80.9	26.4	18.1	80.9	0	1	0	0	2	1276.7	9229.66	14930700	843	853
Mudpit_Aged L3_4 Posterior NP IAF	Inter-alpha (Globulin) inhibitor H4 (Plasma Kallikrein-sensitive glycoprotein) OS=Homo sapiens GN=ITIH4 PE=2 SV=1	B2RMS9	ITIH4	103363	25	38	147	YIFHNFMER	K	L	0.978	28.3	25	14.8	28.3	0	1	0	0	2	1256.59	8915.56	10597000	538	546
Mudpit_Aged L3_4 Posterior NP IAF	cDNA FLJ51929, highly similar to Plastin-3 OS=Homo sapiens PE=2 SV=1	B4DPW9,P13797,Q53GY0	PLS3	70813.9	2	2	2	DGETLEELMK	R	L	0.997	37.4	25	15.3	37.4	0	1	0	0	2	1164.55	6859.6	4378960	257	266
Mudpit_Aged L3_4 Posterior NP IAF	cDNA FLJ51929, highly similar to Plastin-3 OS=Homo sapiens PE=2 SV=1	B4DPW9,P13797,Q53GY0	PLS3	70813.9	2	2	2	NEALAALLR	R	D	0.997	38.2	25	15.4	38.2	0	1	0	0	2	970.568	7810.07	3071220	248	256
Mudpit_Aged L3_4 Posterior NP IAF	Complement factor I OS=Homo sapiens GN=CFI PE=1 SV=1	E7ETH0,G3XAM2,P05156	CFI	65749.8	6	8	22	ADSPMDDFFQCVNGK	K	Y	0.997	68.1	25	17.3	68.1	0	4	0	0	2	1731.7	7697.31	19946000	219	233
Mudpit_Aged L3_4 Posterior NP IAF	Complement factor I OS=Homo sapiens GN=CFI PE=1 SV=1	E7ETH0,G3XAM2,P05156	CFI	65749.8	6	8	22	AQLGDLPWQVAIK	R	D	0.997	69.8	25.3	17.4	69.8	0	3	0	0	2	1438.81	8972.62	84863700	346	358
Mudpit_Aged L3_4 Posterior NP IAF	Complement factor I OS=Homo sapiens GN=CFI PE=1 SV=1	E7ETH0,G3XAM2,P05156	CFI	65749.8	6	8	22	HGNTDSEGIVEVK	K	L	0.997	78.2	25.7	27.1	69	0	3	4	0	2	1384.67	4857.27	39655500	118	130
Mudpit_Aged L3_4 Posterior NP IAF	Complement factor I OS=Homo sapiens GN=CFI PE=1 SV=1	E7ETH0,G3XAM2,P05156	CFI	65749.8	6	8	22	IVIEYVDR	R	I	0.99	41.2	27.1	17.6	39.2	0	2	0	0	2	1006.56	4922.7	33148600	407	414
Mudpit_Aged L3_4 Posterior NP IAF	Complement factor I OS=Homo sapiens GN=CFI PE=1 SV=1	E7ETH0,G3XAM2,P05156	CFI	65749.8	6	8	22	VFSLQWGEVK	R	L	0.997	49.3	27.7	16.1	49.3	0	2	0	0	2	1192.64	7902.33	18425400	481	490
Mudpit_Aged L3_4 Posterior NP IAF	Complement factor I OS=Homo sapiens GN=CFI PE=1 SV=1	E7ETH0,G3XAM2,P05156	CFI	65749.8	6	8	22	VTYTSQEDLVEK	K	K	0.997	69.8	25.8	17.4	69.8	0	4	0	0	2	1411.7	3816.79	17870000	20	31
Mudpit_Aged L3_4 Posterior NP IAF	Epididymis tissue protein Li 173 OS=Homo sapiens GN=SERPING1 PE=2 SV=1	E9KL26,E9PGN7,P05155	SERPING1	55155.5	7	12	47	GVTSVSQIFHSPDLAIR	K	D	0.997	71.5	26.1	17.5	71.5	0	1	4	0	2	1826.98	8597.87	311455000	217	233
Mudpit_Aged L3_4 Posterior NP IAF	Epididymis tissue protein Li 173 OS=Homo sapiens GN=SERPING1 PE=2 SV=1	E9KL26,E9PGN7,P05155	SERPING1	55155.5	7	12	47	HRLEDMEQALSPSVFK	K	A	0.985	52.9	28.8	16.3	52.9	0	0	1	0	2	1902.94	7585.69	11287700	365	380
Mudpit_Aged L3_4 Posterior NP IAF	Epididymis tissue protein Li 173 OS=Homo sapiens GN=SERPING1 PE=2 SV=1	E9KL26,E9PGN7,P05155	SERPING1	55155.5	7	12	47	LEDMEQALSPSVFK	R	A	0.997	103	26.2	25.2	96.9	0	9	0	0	2	1609.78	6352.6	134175000	367	380
Mudpit_Aged L3_4 Posterior NP IAF	Epididymis tissue protein Li 173 OS=Homo sapiens GN=SERPING1 PE=2 SV=1	E9KL26,E9PGN7,P05155	SERPING1	55155.5	7	12	47	LLDSLPSDTR	R	L	0.997	51.8	28	16.2	51.8	0	6	0	0	2	1116.59	4592.51	193299000	277	286
Mudpit_Aged L3_4 Posterior NP IAF	Epididymis tissue protein Li 173 OS=Homo sapiens GN=SERPING1 PE=2 SV=1	E9KL26,E9PGN7,P05155	SERPING1	55155.5	7	12	47	TNLESILSYPK	K	D	0.997	58.9	26.3	16.7	58.9	0	8	0	0	2	1264.68	8014.53	152082000	191	201
Mudpit_Aged L3_4 Posterior NP IAF	Epididymis tissue protein Li 173 OS=Homo sapiens GN=SERPING1 PE=2 SV=1	E9KL26,E9PGN7,P05155	SERPING1	55155.5	7	12	47	VTTSQDMLSIMEK	K	L	0.997	88	25.1	18.5	57.1	0	15	0	0	2	1498.71	4759.94	85875900	403	415
Mudpit_Aged L3_4 Posterior NP IAF	Epididymis tissue protein Li 173 OS=Homo sapiens GN=SERPING1 PE=2 SV=1	E9KL26,E9PGN7,P05155	SERPING1	55155.5	7	12	47	YPVAHFIDQTLK	K	A	0.997	80.8	27.3	18.1	80.8	0	1	2	0	2	1431.76	9245.16	53228300	330	341
Mudpit_Aged L3_4 Posterior NP IAF	Serpin peptidase inhibitor, clade A (Alpha-1 antiproteinase, antitrypsin), member 5, isoform CRA_a OS=Homo sapiens GN=SERPINA5 PE=3 SV=1	A0A024R6N9,P05154	SERPINA5	45675.8	10	13	28	AAAATGTIFTFR	R	S	0.997	57.5	25.8	16.6	57.5	0	2	0	0	2	1226.65	6757.44	18933000	362	373
Mudpit_Aged L3_4 Posterior NP IAF	Serpin peptidase inhibitor, clade A (Alpha-1 antiproteinase, antitrypsin), member 5, isoform CRA_a OS=Homo sapiens GN=SERPINA5 PE=3 SV=1	A0A024R6N9,P05154	SERPINA5	45675.8	10	13	28	AVVEVDESGTR	K	A	0.997	70.3	26.7	17.4	70.3	0	3	0	0	2	1161.57	2286.87	44257000	351	361
Mudpit_Aged L3_4 Posterior NP IAF	Serpin peptidase inhibitor, clade A (Alpha-1 antiproteinase, antitrypsin), member 5, isoform CRA_a OS=Homo sapiens GN=SERPINA5 PE=3 SV=1	A0A024R6N9,P05154	SERPINA5	45675.8	10	13	28	EDQYHYLLDR	R	N	0.997	41.6	25	23	34.2	0	1	2	0	2	1351.63	5401.34	28800700	239	248
Mudpit_Aged L3_4 Posterior NP IAF	Serpin peptidase inhibitor, clade A (Alpha-1 antiproteinase, antitrypsin), member 5, isoform CRA_a OS=Homo sapiens GN=SERPINA5 PE=3 SV=1	A0A024R6N9,P05154	SERPINA5	45675.8	10	13	28	FSIEGSYQLEK	K	V	0.997	67	27.6	25.9	58.2	0	3	0	0	2	1300.64	6053.24	61857000	306	316
Mudpit_Aged L3_4 Posterior NP IAF	Serpin peptidase inhibitor, clade A (Alpha-1 antiproteinase, antitrypsin), member 5, isoform CRA_a OS=Homo sapiens GN=SERPINA5 PE=3 SV=1	A0A024R6N9,P05154	SERPINA5	45675.8	10	13	28	GFQQLLQELNQPR	R	D	0.997	80.4	27.4	18	80.4	0	3	2	0	2	1570.83	9096.75	95235800	110	122
Mudpit_Aged L3_4 Posterior NP IAF	Serpin peptidase inhibitor, clade A (Alpha-1 antiproteinase, antitrypsin), member 5, isoform CRA_a OS=Homo sapiens GN=SERPINA5 PE=3 SV=1	A0A024R6N9,P05154	SERPINA5	45675.8	10	13	28	GTQEQDFYVTSETVVR	K	V	0.997	103	25.2	19.4	103	0	4	0	0	2	1858.88	6044.59	35671600	217	232
Mudpit_Aged L3_4 Posterior NP IAF	Serpin peptidase inhibitor, clade A (Alpha-1 antiproteinase, antitrypsin), member 5, isoform CRA_a OS=Homo sapiens GN=SERPINA5 PE=3 SV=1	A0A024R6N9,P05154	SERPINA5	45675.8	10	13	28	MQILEGLGLNLQK	K	S	0.997	73.2	25.9	17.6	73.2	0	3	0	0	2	1456.82	8703.85	29847600	89	101
Mudpit_Aged L3_4 Posterior NP IAF	Serpin peptidase inhibitor, clade A (Alpha-1 antiproteinase, antitrypsin), member 5, isoform CRA_a OS=Homo sapiens GN=SERPINA5 PE=3 SV=1	A0A024R6N9,P05154	SERPINA5	45675.8	10	13	28	MQQVENGLSEK	K	T	0.997	37.1	25.7	25.3	27	0	1	0	0	2	1262.6	2141.36	3145320	275	285
Mudpit_Aged L3_4 Posterior NP IAF	Serpin peptidase inhibitor, clade A (Alpha-1 antiproteinase, antitrypsin), member 5, isoform CRA_a OS=Homo sapiens GN=SERPINA5 PE=3 SV=1	A0A024R6N9,P05154	SERPINA5	45675.8	10	13	28	QLELYLPK	R	F	0.99	51.4	25.3	24.2	43.4	0	3	0	0	2	1003.58	7174.43	39658700	298	305
Mudpit_Aged L3_4 Posterior NP IAF	Serpin peptidase inhibitor, clade A (Alpha-1 antiproteinase, antitrypsin), member 5, isoform CRA_a OS=Homo sapiens GN=SERPINA5 PE=3 SV=1	A0A024R6N9,P05154	SERPINA5	45675.8	10	13	28	TLYLADTFPTNFR	K	D	0.997	40.7	27.2	15.5	40.7	0	1	0	0	2	1558.79	8924.36	12186900	151	163
Mudpit_Aged L3_4 Posterior NP IAF	cDNA FLJ77770, highly similar to Homo sapiens nucleobindin 1 (NUCB1), mRNA OS=Homo sapiens PE=2 SV=1	A8K7Q1,Q02818,Q53GX6	NUCB1	53879.6	5	5	5	DLAQYDAAHHEEFK	R	R	0.951	31.9	25	15	31.9	0	0	1	0	2	1673.76	5435.87	12502500	164	177
Mudpit_Aged L3_4 Posterior NP IAF	cDNA FLJ77770, highly similar to Homo sapiens nucleobindin 1 (NUCB1), mRNA OS=Homo sapiens PE=2 SV=1	A8K7Q1,Q02818,Q53GX6	NUCB1	53879.6	5	5	5	EVWEELDGLDPNR	K	F	0.989	32.1	25.1	15	32.1	0	1	0	0	2	1571.73	8009.03	2807460	230	242
Mudpit_Aged L3_4 Posterior NP IAF	cDNA FLJ77770, highly similar to Homo sapiens nucleobindin 1 (NUCB1), mRNA OS=Homo sapiens PE=2 SV=1	A8K7Q1,Q02818,Q53GX6	NUCB1	53879.6	5	5	5	FEEELAAR	R	E	0.99	36.7	27.8	15.3	36.7	0	1	0	0	2	964.473	3408.2	4412750	350	357
Mudpit_Aged L3_4 Posterior NP IAF	cDNA FLJ77770, highly similar to Homo sapiens nucleobindin 1 (NUCB1), mRNA OS=Homo sapiens PE=2 SV=1	A8K7Q1,Q02818,Q53GX6	NUCB1	53879.6	5	5	5	LPEVEVPQHL	R	-	0.973	28.7	27.8	14.8	28.7	0	1	0	0	2	1160.63	6543.55	8156750	452	461
Mudpit_Aged L3_4 Posterior NP IAF	cDNA FLJ77770, highly similar to Homo sapiens nucleobindin 1 (NUCB1), mRNA OS=Homo sapiens PE=2 SV=1	A8K7Q1,Q02818,Q53GX6	NUCB1	53879.6	5	5	5	LSQETEALGR	R	S	0.997	53.9	29	18.8	51.5	0	1	0	0	2	1103.57	2355.43	3503680	368	377
Mudpit_Aged L3_4 Posterior NP IAF	Ferritin light chain OS=Homo sapiens GN=FTL PE=1 SV=2	P02792	FTL	20020.6	3	4	7	DDVALEGVSHFFR	R	E	0.996	51.1	25.5	16.2	51.1	0	1	1	0	2	1491.72	9253.53	20176600	41	53
Mudpit_Aged L3_4 Posterior NP IAF	Ferritin light chain OS=Homo sapiens GN=FTL PE=1 SV=2	P02792	FTL	20020.6	3	4	7	LGGPEAGLGEYLFER	R	L	0.997	91.3	26.7	18.7	91.3	0	3	0	0	2	1607.81	8923	37947500	155	169
Mudpit_Aged L3_4 Posterior NP IAF	Ferritin light chain OS=Homo sapiens GN=FTL PE=1 SV=2	P02792	FTL	20020.6	3	4	7	LNQALLDLHALGSAR	K	T	0.997	73.6	25	17.6	73.6	0	0	2	0	2	1591.89	8271.17	31097200	107	121
Mudpit_Aged L3_4 Posterior NP IAF	Hemopexin OS=Homo sapiens GN=HPX PE=1 SV=2	P02790	HPX	51676.5	11	15	58	DGWHSWPIAHQWPQGPSAVDAAFSWEEK	R	L	0.997	65.7	25	17.1	65.7	0	0	2	1	2	3219.47	9437.83	16800000	290	317
Mudpit_Aged L3_4 Posterior NP IAF	Hemopexin OS=Homo sapiens GN=HPX PE=1 SV=2	P02790	HPX	51676.5	11	15	58	EWFWDLATGTMK	R	E	0.997	55.1	25	16.4	55.1	0	8	0	0	2	1484.69	9246.98	214505000	167	178
Mudpit_Aged L3_4 Posterior NP IAF	Hemopexin OS=Homo sapiens GN=HPX PE=1 SV=2	P02790	HPX	51676.5	11	15	58	GGYTLVSGYPK	K	R	0.997	67.9	26.3	25.9	59.3	0	6	0	0	2	1141.59	5059.82	117549000	333	343
Mudpit_Aged L3_4 Posterior NP IAF	Hemopexin OS=Homo sapiens GN=HPX PE=1 SV=2	P02790	HPX	51676.5	11	15	58	NFPSPVDAAFR	K	Q	0.997	44.6	26.4	15.8	44.6	0	9	0	0	2	1220.61	6753.31	887140000	92	102
Mudpit_Aged L3_4 Posterior NP IAF	Hemopexin OS=Homo sapiens GN=HPX PE=1 SV=2	P02790	HPX	51676.5	11	15	58	QGHNSVFLIK	R	G	0.996	49.2	26.7	22.4	42.8	0	3	6	0	2	1142.63	7297.33	72731300	103	112
Mudpit_Aged L3_4 Posterior NP IAF	Hemopexin OS=Homo sapiens GN=HPX PE=1 SV=2	P02790	HPX	51676.5	11	15	58	RLWWLDLK	R	S	0.989	31.6	25	15	31.6	0	1	0	0	2	1129.65	9480.52	5349910	379	386
Mudpit_Aged L3_4 Posterior NP IAF	Hemopexin OS=Homo sapiens GN=HPX PE=1 SV=2	P02790	HPX	51676.5	11	15	58	SGAQATWTELPWPHEK	K	V	0.997	84.9	26	18.3	84.9	0	5	3	0	2	1837.89	9126.93	174855000	387	402
Mudpit_Aged L3_4 Posterior NP IAF	Hemopexin OS=Homo sapiens GN=HPX PE=1 SV=2	P02790	HPX	51676.5	11	15	58	SLGPNSCSANGPGLYLIHGPNLYCYSDVEK	K	L	0.98	55.1	25	16.4	55.1	0	0	2	0	2	3284.49	9164.89	33756000	412	441
Mudpit_Aged L3_4 Posterior NP IAF	Hemopexin OS=Homo sapiens GN=HPX PE=1 SV=2	P02790	HPX	51676.5	11	15	58	SWPAVGNCSSALR	R	W	0.952	24.9	25.8	14.6	24.9	0	1	0	0	2	1405.65	5970.38	4469920	181	193
Mudpit_Aged L3_4 Posterior NP IAF	Hemopexin OS=Homo sapiens GN=HPX PE=1 SV=2	P02790	HPX	51676.5	11	15	58	VWVYPPEK	K	K	0.99	38.1	26.6	15.4	38.1	0	10	0	0	2	1017.54	5311.91	341009000	116	123
Mudpit_Aged L3_4 Posterior NP IAF	Hemopexin OS=Homo sapiens GN=HPX PE=1 SV=2	P02790	HPX	51676.5	11	15	58	YYCFQGNQFLR	R	F	0.997	53	25	16.3	53	0	1	0	0	2	1496.66	7896.05	4032060	198	208
Mudpit_Aged L3_4 Posterior NP IAF	Phospholipid transfer protein, isoform CRA_c OS=Homo sapiens GN=PLTP PE=2 SV=1	B3KUE5,P55058	PLTP	54741.2	7	10	16	AGALQLLLVGDK	R	V	0.997	59.2	25	16.7	59.2	0	2	0	0	2	1197.72	8740.83	6762910	283	294
Mudpit_Aged L3_4 Posterior NP IAF	Phospholipid transfer protein, isoform CRA_c OS=Homo sapiens GN=PLTP PE=2 SV=1	B3KUE5,P55058	PLTP	54741.2	7	10	16	AVEPQLQEEER	R	M	0.997	58.3	25	16.8	58.2	0	3	0	0	2	1327.65	2982.84	48092500	252	262
Mudpit_Aged L3_4 Posterior NP IAF	Phospholipid transfer protein, isoform CRA_c OS=Homo sapiens GN=PLTP PE=2 SV=1	B3KUE5,P55058	PLTP	54741.2	7	10	16	DPVASTSNLDMDFR	K	G	0.997	87.1	25	18.4	87.1	0	3	0	0	2	1583.7	5588.15	13110800	222	235
Mudpit_Aged L3_4 Posterior NP IAF	Phospholipid transfer protein, isoform CRA_c OS=Homo sapiens GN=PLTP PE=2 SV=1	B3KUE5,P55058	PLTP	54741.2	7	10	16	FLEQELETITIPDLR	R	G	0.997	113	26.5	20.1	113	0	2	1	0	2	1816.97	9243.33	44530800	41	55
Mudpit_Aged L3_4 Posterior NP IAF	Phospholipid transfer protein, isoform CRA_c OS=Homo sapiens GN=PLTP PE=2 SV=1	B3KUE5,P55058	PLTP	54741.2	7	10	16	GAFFPLTER	R	N	0.99	37.9	27.4	15.8	37.5	0	1	0	0	2	1037.54	7155.98	11993200	236	244
Mudpit_Aged L3_4 Posterior NP IAF	Phospholipid transfer protein, isoform CRA_c OS=Homo sapiens GN=PLTP PE=2 SV=1	B3KUE5,P55058	PLTP	54741.2	7	10	16	TMLQIGVMPMLNER	K	T	0.997	48.4	27.5	16	48.4	0	1	0	0	2	1632.83	9092.96	10829300	416	429
Mudpit_Aged L3_4 Posterior NP IAF	Phospholipid transfer protein, isoform CRA_c OS=Homo sapiens GN=PLTP PE=2 SV=1	B3KUE5,P55058	PLTP	54741.2	7	10	16	VYDFLSTFITSGMR	K	F	0.997	66.7	26.9	17.2	66.7	0	3	0	0	2	1636.8	9169.33	105914000	164	177
Mudpit_Aged L3_4 Posterior NP IAF	Serpin peptidase inhibitor, clade E (Nexin, plasminogen activator inhibitor type 1), member 1, isoform CRA_b OS=Homo sapiens GN=SERPINE1 PE=3 SV=1	A0A024QYT5,B7ZAB0,P05121	SERPINE1	45060.3	6	7	9	DEISTTDAIFVQR	K	D	0.997	98.5	27.5	19.2	98.5	0	1	0	0	2	1494.74	6664.31	19886400	112	124
Mudpit_Aged L3_4 Posterior NP IAF	Serpin peptidase inhibitor, clade E (Nexin, plasminogen activator inhibitor type 1), member 1, isoform CRA_b OS=Homo sapiens GN=SERPINE1 PE=3 SV=1	A0A024QYT5,B7ZAB0,P05121	SERPINE1	45060.3	6	7	9	FIINDWVK	R	T	0.988	32	27.4	24.2	22.8	0	1	0	0	2	1034.57	8035.38	4510450	157	164
Mudpit_Aged L3_4 Posterior NP IAF	Serpin peptidase inhibitor, clade E (Nexin, plasminogen activator inhibitor type 1), member 1, isoform CRA_b OS=Homo sapiens GN=SERPINE1 PE=3 SV=1	A0A024QYT5,B7ZAB0,P05121	SERPINE1	45060.3	6	7	9	FSLETEVDLR	K	K	0.993	37.4	27.2	15.3	37.4	0	1	0	0	2	1208.62	7211.9	4862700	301	310
Mudpit_Aged L3_4 Posterior NP IAF	Serpin peptidase inhibitor, clade E (Nexin, plasminogen activator inhibitor type 1), member 1, isoform CRA_b OS=Homo sapiens GN=SERPINE1 PE=3 SV=1	A0A024QYT5,B7ZAB0,P05121	SERPINE1	45060.3	6	7	9	HNPTGTVLFMGQVMEP	R	-	0.997	69.1	25	17.3	69.1	0	3	0	0	2	1757.84	8506.25	10759100	387	402
Mudpit_Aged L3_4 Posterior NP IAF	Serpin peptidase inhibitor, clade E (Nexin, plasminogen activator inhibitor type 1), member 1, isoform CRA_b OS=Homo sapiens GN=SERPINE1 PE=3 SV=1	A0A024QYT5,B7ZAB0,P05121	SERPINE1	45060.3	6	7	9	QFQADFTSLSDQEPLHVAQALQK	R	V	0.996	57.9	26.2	16.6	57.9	0	0	1	0	2	2601.29	9166.6	13319500	324	346
Mudpit_Aged L3_4 Posterior NP IAF	Serpin peptidase inhibitor, clade E (Nexin, plasminogen activator inhibitor type 1), member 1, isoform CRA_b OS=Homo sapiens GN=SERPINE1 PE=3 SV=1	A0A024QYT5,B7ZAB0,P05121	SERPINE1	45060.3	6	7	9	QVDFSEVER	K	A	0.996	36.5	25.1	15.3	36.5	0	2	0	0	2	1108.53	4304.38	21476200	146	154
Mudpit_Aged L3_4 Posterior NP IAF	Transthyretin OS=Homo sapiens PE=2 SV=1	A6XGL1,E9KL36,P02766	TTR	15886.9	7	14	131	AADDTWEPFASGK	K	T	0.997	115	25	20.2	115	0	22	0	0	2	1394.62	6076.38	2386230000	56	68
Mudpit_Aged L3_4 Posterior NP IAF	Transthyretin OS=Homo sapiens PE=2 SV=1	A6XGL1,E9KL36,P02766	TTR	15886.9	7	14	131	ALGISPFHEHAEVVFTANDSGPR	K	R	0.997	81.7	32.4	18.1	81.7	0	3	26	17	2	2451.21	9887.79	475606000	101	123
Mudpit_Aged L3_4 Posterior NP IAF	Transthyretin OS=Homo sapiens PE=2 SV=1	A6XGL1,E9KL36,P02766	TTR	15886.9	7	14	131	GSPAINVAVHVFR	R	K	0.997	72.3	25	17.5	72.3	0	2	3	0	2	1366.76	8964.06	176971000	42	54
Mudpit_Aged L3_4 Posterior NP IAF	Transthyretin OS=Homo sapiens PE=2 SV=1	A6XGL1,E9KL36,P02766	TTR	15886.9	7	14	131	KAADDTWEPFASGK	R	T	0.997	96.2	25.5	19	96.2	0	2	1	0	2	1522.72	5046.77	19800100	55	68
Mudpit_Aged L3_4 Posterior NP IAF	Transthyretin OS=Homo sapiens PE=2 SV=1	A6XGL1,E9KL36,P02766	TTR	15886.9	7	14	131	TSESGELHGLTTEEEFVEGIYK	K	V	0.997	106	25.2	19.6	106	0	16	29	0	2	2455.15	9156.36	793851000	69	90
Mudpit_Aged L3_4 Posterior NP IAF	Transthyretin OS=Homo sapiens PE=2 SV=1	A6XGL1,E9KL36,P02766	TTR	15886.9	7	14	131	YTIAALLSPYSYSTTAVVTNPK	R	-	0.997	126	27.3	20.9	126	0	3	1	0	2	2360.24	9116.74	447363000	125	146
Mudpit_Aged L3_4 Posterior NP IAF	Transthyretin OS=Homo sapiens PE=2 SV=1	A6XGL1,E9KL36,P02766	TTR	15886.9	7	14	131	YTIAALLSPYSYSTTAVVTNPKE	R	-	0.997	98.3	26.4	19.1	98.3	0	3	3	0	2	2489.28	9120.28	144923000	125	147
Mudpit_Aged L3_4 Posterior NP IAF	cDNA FLJ55606, highly similar to Alpha-2-HS-glycoprotein OS=Homo sapiens PE=2 SV=1	B7Z8Q2,C9JV77,P02765	AHSG	39323.4	3	6	22	HTFMGVVSLGSPSGEVSHPR	R	K	0.997	81.5	26.8	18.1	81.5	0	0	9	6	2	2097.02	8376.82	130607000	318	337
Mudpit_Aged L3_4 Posterior NP IAF	cDNA FLJ55606, highly similar to Alpha-2-HS-glycoprotein OS=Homo sapiens PE=2 SV=1	B7Z8Q2,C9JV77,P02765	AHSG	39323.4	3	6	22	HTLNQIDEVK	K	V	0.997	76.2	25.4	17.8	76.2	0	6	0	0	2	1196.63	4046.01	310941000	58	67
Mudpit_Aged L3_4 Posterior NP IAF	cDNA FLJ55606, highly similar to Alpha-2-HS-glycoprotein OS=Homo sapiens PE=2 SV=1	B7Z8Q2,C9JV77,P02765	AHSG	39323.4	3	6	22	QPNCDDPETEEAALVAIDYINQNLPWGYK	R	H	0.95	53.5	25	16.3	53.5	0	0	1	0	2	3364.53	9535.58	5833980	29	57
Mudpit_Aged L3_4 Posterior NP IAF	Protein AMBP OS=Homo sapiens GN=AMBP PE=1 SV=1	P02760	AMBP	38999.6	4	10	45	AFIQLWAFDAVK	R	G	0.997	56.4	25.5	16.5	56.4	0	1	0	0	2	1408.76	9208.78	34852100	298	309
Mudpit_Aged L3_4 Posterior NP IAF	Protein AMBP OS=Homo sapiens GN=AMBP PE=1 SV=1	P02760	AMBP	38999.6	4	10	45	ETLLQDFR	R	V	0.99	49.8	28	16.1	49.8	0	4	0	0	2	1021.53	6411.73	179214000	159	166
Mudpit_Aged L3_4 Posterior NP IAF	Protein AMBP OS=Homo sapiens GN=AMBP PE=1 SV=1	P02760	AMBP	38999.6	4	10	45	MTVSTLVLGEGATEAEISMTSTR	R	W	0.997	136	26.3	21.5	136	0	6	8	0	2	2400.16	7951.03	59734900	63	85
Mudpit_Aged L3_4 Posterior NP IAF	Protein AMBP OS=Homo sapiens GN=AMBP PE=1 SV=1	P02760	AMBP	38999.6	4	10	45	VVAQGVGIPEDSIFTMADR	R	G	0.997	90.7	26.7	18.7	90.7	0	17	9	0	2	2005.01	8567.58	213417000	167	185
Mudpit_Aged L3_4 Posterior NP IAF	Mesenchymal stromal cell-and fibroblast-expressing Linx paralogue OS=Homo sapiens GN=Meflin PE=2 SV=1	A0A146E5L3_HUMAN,O14498	ISLR	45998.3	4	4	6	ALPGTPVASSQPR	R	F	0.997	44.5	25	15.8	44.5	0	2	0	0	2	1280.7	3284.44	9338550	291	303
Mudpit_Aged L3_4 Posterior NP IAF	Mesenchymal stromal cell-and fibroblast-expressing Linx paralogue OS=Homo sapiens GN=Meflin PE=2 SV=1	A0A146E5L3_HUMAN,O14498	ISLR	45998.3	4	4	6	LPGLPEGAFR	R	E	0.997	44.4	26.6	29	31.1	0	2	0	0	2	1056.58	6992.99	29514800	62	71
Mudpit_Aged L3_4 Posterior NP IAF	Mesenchymal stromal cell-and fibroblast-expressing Linx paralogue OS=Homo sapiens GN=Meflin PE=2 SV=1	A0A146E5L3_HUMAN,O14498	ISLR	45998.3	4	4	6	MDSNELTFIPR	K	D	0.997	73.8	30.3	17.6	73.8	0	1	0	0	2	1338.64	6465.65	8013890	129	139
Mudpit_Aged L3_4 Posterior NP IAF	Mesenchymal stromal cell-and fibroblast-expressing Linx paralogue OS=Homo sapiens GN=Meflin PE=2 SV=1	A0A146E5L3_HUMAN,O14498	ISLR	45998.3	4	4	6	TVAAGALASLSHLK	R	S	0.989	54	25	16.4	54	0	0	1	0	2	1338.77	7267.79	7646280	88	101
Mudpit_Aged L3_4 Posterior NP IAF	Apolipoprotein L, 1, isoform CRA_b OS=Homo sapiens GN=APOL1 PE=4 SV=1	A0A024R1G8,A0A024R1Q4,A5PL32,O14791,Q1WWL5,Q29RW7,Q2KHQ6	APOL1	43975.3	4	6	9	EFLGENISNFLSLAGNTYQLTR	R	G	0.997	144	27	22	0	0	1	1	0	2	2487.25	9398.57	22884800	256	277
Mudpit_Aged L3_4 Posterior NP IAF	Apolipoprotein L, 1, isoform CRA_b OS=Homo sapiens GN=APOL1 PE=4 SV=1	A0A024R1G8,A0A024R1Q4,A5PL32,O14791,Q1WWL5,Q29RW7,Q2KHQ6	APOL1	43975.3	4	6	9	VNEPSILEMSR	R	G	0.997	74.4	32	18	74	0	1	0	0	2	1274.64	5945.1	61104300	321	331
Mudpit_Aged L3_4 Posterior NP IAF	Apolipoprotein L, 1, isoform CRA_b OS=Homo sapiens GN=APOL1 PE=4 SV=1	A0A024R1G8,A0A024R1Q4,A5PL32,O14791,Q1WWL5,Q29RW7,Q2KHQ6	APOL1	43975.3	4	6	9	VTEPISAESGEQVER	R	V	0.997	96.6	26.1	19	96.6	0	4	1	0	2	1630.79	3714.7	66126200	306	320
Mudpit_Aged L3_4 Posterior NP IAF	Apolipoprotein L, 1, isoform CRA_b OS=Homo sapiens GN=APOL1 PE=4 SV=1	A0A024R1G8,A0A024R1Q4,A5PL32,O14791,Q1WWL5,Q29RW7,Q2KHQ6	APOL1	43975.3	4	6	9	WWTQAQAHDLVIK	K	S	0.956	33.7	27.2	15.1	33.7	0	0	1	0	2	1595.83	8776	11028700	234	246
Mudpit_Aged L3_4 Posterior NP IAF	cDNA FLJ60299, highly similar to Rab GDP dissociation inhibitor beta OS=Homo sapiens PE=2 SV=1	B4DLV7,P50395,Q6IAT1	GDI2	50665.5	2	2	2	DLGTESQIFISR	K	T	0.997	39.5	26.9	15.5	39.5	0	1	0	0	2	1365.7	6651.16	6552560	391	402
Mudpit_Aged L3_4 Posterior NP IAF	cDNA FLJ60299, highly similar to Rab GDP dissociation inhibitor beta OS=Homo sapiens PE=2 SV=1	B4DLV7,P50395,Q6IAT1	GDI2	50665.5	2	2	2	LYSESLAR	K	Y	0.99	38.2	25	20.5	33	0	1	0	0	2	938.494	2768.87	7578510	211	218
Mudpit_Aged L3_4 Posterior NP IAF	cDNA FLJ90373 fis, clone NT2RP2004606, highly similar to Metalloproteinase inhibitor 1 OS=Homo sapiens PE=2 SV=1	B3KQF4,P01033,Q58P21,Q5H9A7,Q6FGX5	TIMP1	23171.1	3	3	7	GFQALGDAADIR	K	F	0.997	59.9	31.6	16.7	59.9	0	4	0	0	2	1233.62	5799.15	48930000	71	82
Mudpit_Aged L3_4 Posterior NP IAF	cDNA FLJ90373 fis, clone NT2RP2004606, highly similar to Metalloproteinase inhibitor 1 OS=Homo sapiens PE=2 SV=1	B3KQF4,P01033,Q58P21,Q5H9A7,Q6FGX5	TIMP1	23171.1	3	3	7	LQSGTHCLWTDQLLQGSEK	K	G	0.993	50.7	27	16.2	50.7	0	1	0	0	2	2202.05	8776.99	2198290	162	180
Mudpit_Aged L3_4 Posterior NP IAF	cDNA FLJ90373 fis, clone NT2RP2004606, highly similar to Metalloproteinase inhibitor 1 OS=Homo sapiens PE=2 SV=1	B3KQF4,P01033,Q58P21,Q5H9A7,Q6FGX5	TIMP1	23171.1	3	3	7	SEEFLIAGK	R	L	0.997	52.4	27.7	16.3	52.4	0	2	0	0	2	993.525	4744.6	38489100	103	111
Mudpit_Aged L3_4 Posterior NP IAF	Leucine-rich alpha-2-glycoprotein OS=Homo sapiens GN=LRG1 PE=1 SV=2	P02750	LRG1	38179.7	7	9	42	ALGHLDLSGNR	K	L	0.997	51.4	27	16.2	51.4	0	2	2	0	2	1152.61	4843.41	43454300	165	175
Mudpit_Aged L3_4 Posterior NP IAF	Leucine-rich alpha-2-glycoprotein OS=Homo sapiens GN=LRG1 PE=1 SV=2	P02750	LRG1	38179.7	7	9	42	DLLLPQPDLR	K	Y	0.997	39.1	25	15.4	39.1	0	2	0	0	2	1179.67	7598.01	59970800	230	239
Mudpit_Aged L3_4 Posterior NP IAF	Leucine-rich alpha-2-glycoprotein OS=Homo sapiens GN=LRG1 PE=1 SV=2	P02750	LRG1	38179.7	7	9	42	ENQLEVLEVSWLHGLK	K	A	0.996	62.1	26.6	16.9	62.1	0	0	26	0	2	1894.01	10052.5	38200900	149	164
Mudpit_Aged L3_4 Posterior NP IAF	Leucine-rich alpha-2-glycoprotein OS=Homo sapiens GN=LRG1 PE=1 SV=2	P02750	LRG1	38179.7	7	9	42	GQTLLAVAK	K	S	0.997	51.7	25	16.2	51.7	0	4	0	0	2	900.551	3975.6	31497800	337	345
Mudpit_Aged L3_4 Posterior NP IAF	Leucine-rich alpha-2-glycoprotein OS=Homo sapiens GN=LRG1 PE=1 SV=2	P02750	LRG1	38179.7	7	9	42	NALTGLPPGLFQASATLDTLVLK	R	E	0.997	56.3	25	16.5	56.3	0	1	0	0	2	2340.32	9438.08	7230670	126	148
Mudpit_Aged L3_4 Posterior NP IAF	Leucine-rich alpha-2-glycoprotein OS=Homo sapiens GN=LRG1 PE=1 SV=2	P02750	LRG1	38179.7	7	9	42	TLDLGENQLETLPPDLLR	R	G	0.997	107	26.2	19.7	107	0	1	2	0	2	2037.09	9052.05	63090700	192	209
Mudpit_Aged L3_4 Posterior NP IAF	Leucine-rich alpha-2-glycoprotein OS=Homo sapiens GN=LRG1 PE=1 SV=2	P02750	LRG1	38179.7	7	9	42	VAAGAFQGLR	R	Q	0.997	57.3	25.9	17	56.8	0	2	0	0	2	989.553	4502.64	16493900	251	260
Mudpit_Aged L3_4 Posterior NP IAF	Lambda-chain (AA -20 to 215) OS=Homo sapiens PE=1 SV=1	A2NUT2		24654.5	6	8	76	AAPSVTLFPPSSEELQANK	K	A	0.997	81.5	26.1	18.1	81.5	0	28	15	0	2	1986.02	7508.03	2054010000	134	152
Mudpit_Aged L3_4 Posterior NP IAF	Lambda-chain (AA -20 to 215) OS=Homo sapiens PE=1 SV=1	A2NUT2		24654.5	6	8	76	AGVETTTPSK	K	Q	0.997	61.9	27.8	17	61.7	0	2	0	0	2	990.51	1398.84	698202	180	189
Mudpit_Aged L3_4 Posterior NP IAF	Lambda-chain (AA -20 to 215) OS=Homo sapiens PE=1 SV=1	A2NUT2		24654.5	6	8	76	LLIYDNNK	K	R	0.99	41.4	27.7	15.9	41.1	0	3	0	0	2	992.541	3897.33	46162000	66	73
Mudpit_Aged L3_4 Posterior NP IAF	Lambda-chain (AA -20 to 215) OS=Homo sapiens PE=1 SV=1	A2NUT2		24654.5	6	8	76	LTVLGQPK	K	A	0.99	43.4	25	15.7	43.4	0	8	0	0	2	855.53	3480.04	402371000	126	133
Mudpit_Aged L3_4 Posterior NP IAF	Lambda-chain (AA -20 to 215) OS=Homo sapiens PE=1 SV=1	A2NUT2		24654.5	6	8	76	SYSCQVTHEGSTVEK	R	T	0.997	57.4	25	16.6	57.4	0	1	0	0	2	1712.74	2932.11	1172550	213	227
Mudpit_Aged L3_4 Posterior NP IAF	Lambda-chain (AA -20 to 215) OS=Homo sapiens PE=1 SV=1	A2NUT2		24654.5	6	8	76	YAASSYLSLTPEQWK	K	S	0.997	110	27.1	19.9	110	0	14	5	0	2	1743.86	8514.13	432007000	195	209
Mudpit_Aged L3_4 Posterior NP IAF	Complement component 9, isoform CRA_a OS=Homo sapiens GN=C9 PE=4 SV=1	A0A024R035,P02748	C9	63174.9	17	25	138	AIEDYINEFSVR	R	K	0.997	80.3	27	18	80.3	0	9	1	0	2	1455.71	8169.85	321033000	497	508
Mudpit_Aged L3_4 Posterior NP IAF	Complement component 9, isoform CRA_a OS=Homo sapiens GN=C9 PE=4 SV=1	A0A024R035,P02748	C9	63174.9	17	25	138	ALPTTYEK	K	G	0.972	28.5	25.7	14.8	28.5	0	1	0	0	2	922.488	2382.07	21350200	325	332
Mudpit_Aged L3_4 Posterior NP IAF	Complement component 9, isoform CRA_a OS=Homo sapiens GN=C9 PE=4 SV=1	A0A024R035,P02748	C9	63174.9	17	25	138	DGNTLTYYR	R	R	0.997	63.5	25	17	63.5	0	2	0	0	2	1102.52	3838.72	43568300	186	194
Mudpit_Aged L3_4 Posterior NP IAF	Complement component 9, isoform CRA_a OS=Homo sapiens GN=C9 PE=4 SV=1	A0A024R035,P02748	C9	63174.9	17	25	138	DRDGNTLTYYR	R	R	0.997	57	25	24.2	49.4	0	3	1	0	2	1373.64	3587.22	103384000	184	194
Mudpit_Aged L3_4 Posterior NP IAF	Complement component 9, isoform CRA_a OS=Homo sapiens GN=C9 PE=4 SV=1	A0A024R035,P02748	C9	63174.9	17	25	138	DRVVEESELAR	R	T	0.997	65.3	25.9	26.4	56	0	1	0	0	2	1302.66	4502.99	5042160	144	154
Mudpit_Aged L3_4 Posterior NP IAF	Complement component 9, isoform CRA_a OS=Homo sapiens GN=C9 PE=4 SV=1	A0A024R035,P02748	C9	63174.9	17	25	138	DVVLTTTFVDDIK	R	A	0.997	85.1	26.7	18.3	85.1	0	24	1	0	2	1465.78	8569.91	799629000	312	324
Mudpit_Aged L3_4 Posterior NP IAF	Complement component 9, isoform CRA_a OS=Homo sapiens GN=C9 PE=4 SV=1	A0A024R035,P02748	C9	63174.9	17	25	138	FEGIACEISK	K	Q	0.997	42.8	25	15.7	42.8	0	1	0	0	2	1154.54	5672.79	8075790	534	543
Mudpit_Aged L3_4 Posterior NP IAF	Complement component 9, isoform CRA_a OS=Homo sapiens GN=C9 PE=4 SV=1	A0A024R035,P02748	C9	63174.9	17	25	138	FTPTETNK	K	A	0.971	27	26	14.7	27	0	1	0	0	2	937.463	1584.69	754850	243	250
Mudpit_Aged L3_4 Posterior NP IAF	Complement component 9, isoform CRA_a OS=Homo sapiens GN=C9 PE=4 SV=1	A0A024R035,P02748	C9	63174.9	17	25	138	GTVIDVTDFVNWASSINDAPVLISQK	R	L	0.997	121	26.1	20.6	121	0	3	41	1	2	2789.44	9937.06	100602000	447	472
Mudpit_Aged L3_4 Posterior NP IAF	Complement component 9, isoform CRA_a OS=Homo sapiens GN=C9 PE=4 SV=1	A0A024R035,P02748	C9	63174.9	17	25	138	LSPIYNLVPVK	K	M	0.997	56.2	25	16.5	56.2	0	8	0	0	2	1242.75	8248.76	230912000	473	483
Mudpit_Aged L3_4 Posterior NP IAF	Complement component 9, isoform CRA_a OS=Homo sapiens GN=C9 PE=4 SV=1	A0A024R035,P02748	C9	63174.9	17	25	138	NRDVVLTTTFVDDIK	R	A	0.997	62.7	27.5	16.9	62.7	0	1	0	0	2	1735.92	8212.32	5065610	310	324
Mudpit_Aged L3_4 Posterior NP IAF	Complement component 9, isoform CRA_a OS=Homo sapiens GN=C9 PE=4 SV=1	A0A024R035,P02748	C9	63174.9	17	25	138	RPWNVASLIYETK	R	G	0.997	58.8	25.7	24	51.5	0	3	4	0	2	1576.85	9436.88	209670000	195	207
Mudpit_Aged L3_4 Posterior NP IAF	Complement component 9, isoform CRA_a OS=Homo sapiens GN=C9 PE=4 SV=1	A0A024R035,P02748	C9	63174.9	17	25	138	SIEVFGQFNGK	R	R	0.997	45.5	26	15.8	45.5	0	3	0	0	2	1225.62	6680.9	68320900	66	76
Mudpit_Aged L3_4 Posterior NP IAF	Complement component 9, isoform CRA_a OS=Homo sapiens GN=C9 PE=4 SV=1	A0A024R035,P02748	C9	63174.9	17	25	138	TAGYGINILGMDPLSTPFDNEFYNGLCNR	R	D	0.996	68.5	25	17.3	68.5	0	0	5	0	2	3266.48	9433.32	65244500	155	183
Mudpit_Aged L3_4 Posterior NP IAF	Complement component 9, isoform CRA_a OS=Homo sapiens GN=C9 PE=4 SV=1	A0A024R035,P02748	C9	63174.9	17	25	138	TEHYEEQIEAFK	R	S	0.997	82.2	25	21.2	79.1	0	10	4	0	2	1523.7	6536.7	653524000	214	225
Mudpit_Aged L3_4 Posterior NP IAF	Complement component 9, isoform CRA_a OS=Homo sapiens GN=C9 PE=4 SV=1	A0A024R035,P02748	C9	63174.9	17	25	138	TSNFNAAISLK	K	F	0.997	61.2	26.4	16.8	61.2	0	4	0	0	2	1165.62	5571.16	60541100	232	242
Mudpit_Aged L3_4 Posterior NP IAF	Complement component 9, isoform CRA_a OS=Homo sapiens GN=C9 PE=4 SV=1	A0A024R035,P02748	C9	63174.9	17	25	138	VVEESELAR	R	T	0.997	66.3	27.8	17.1	66.3	0	6	0	0	2	1031.54	2336.15	96948400	146	154
Mudpit_Aged L3_4 Posterior NP IAF	Complement component 1, q subcomponent, C chain, isoform CRA_a OS=Homo sapiens GN=C1QC PE=4 SV=1	A0A024RAA7,P02747	C1QC	25774	4	5	11	FNAVLTNPQGDYDTSTGK	R	F	0.997	105	25	19.6	105	0	4	1	0	2	1927.9	5465.75	34683600	140	157
Mudpit_Aged L3_4 Posterior NP IAF	Complement component 1, q subcomponent, C chain, isoform CRA_a OS=Homo sapiens GN=C1QC PE=4 SV=1	A0A024RAA7,P02747	C1QC	25774	4	5	11	FQSVFTVTR	K	Q	0.993	34	25.5	15.1	34	0	2	0	0	2	1084.58	5693.14	26895800	118	126
Mudpit_Aged L3_4 Posterior NP IAF	Complement component 1, q subcomponent, C chain, isoform CRA_a OS=Homo sapiens GN=C1QC PE=4 SV=1	A0A024RAA7,P02747	C1QC	25774	4	5	11	QTHQPPAPNSLIR	R	F	0.986	48.3	28.9	16	48.3	0	0	2	0	2	1458.78	4649.8	13070000	127	139
Mudpit_Aged L3_4 Posterior NP IAF	Complement component 1, q subcomponent, C chain, isoform CRA_a OS=Homo sapiens GN=C1QC PE=4 SV=1	A0A024RAA7,P02747	C1QC	25774	4	5	11	TNQVNSGGVLLR	K	L	0.997	63.7	27.1	27.1	53.6	0	2	0	0	2	1257.69	3665.27	23309400	199	210
Mudpit_Aged L3_4 Posterior NP IAF	Complement component 1, q subcomponent, B chain, isoform CRA_a OS=Homo sapiens GN=C1QB PE=4 SV=1	A0A024RAB9,D6R934,P02746	C1QB	26722.8	2	4	10	FDHVITNMNNNYEPR	R	S	0.997	55.8	25	16.5	55.8	0	2	4	0	2	1863.84	5053.64	66012000	142	156
Mudpit_Aged L3_4 Posterior NP IAF	Complement component 1, q subcomponent, B chain, isoform CRA_a OS=Homo sapiens GN=C1QB PE=4 SV=1	A0A024RAB9,D6R934,P02746	C1QB	26722.8	2	4	10	LEQGENVFLQATDK	K	N	0.997	105	27.3	19.6	105	0	4	0	0	2	1591.8	6090.55	24091000	216	229
Mudpit_Aged L3_4 Posterior NP IAF	C-reactive protein OS=Homo sapiens GN=CRP PE=1 SV=1	P02741	CRP	25039	3	3	5	ESDTSYVSLK	K	A	0.997	64.9	25	17.1	64.9	0	3	0	0	2	1128.54	3536.36	41470900	32	41
Mudpit_Aged L3_4 Posterior NP IAF	C-reactive protein OS=Homo sapiens GN=CRP PE=1 SV=1	P02741	CRP	25039	3	3	5	GYSIFSYATK	R	R	0.997	35.5	25	15.2	35.5	0	1	0	0	2	1136.56	6334.68	16081700	66	75
Mudpit_Aged L3_4 Posterior NP IAF	C-reactive protein OS=Homo sapiens GN=CRP PE=1 SV=1	P02741	CRP	25039	3	3	5	RQDNEILIFWSK	K	D	0.964	36.3	27.1	15.3	36.3	0	0	1	0	2	1548.82	9614.86	3239060	76	87
Mudpit_Aged L3_4 Posterior NP IAF	EMILIN-1 OS=Homo sapiens GN=EMILIN1 PE=1 SV=2	Q9Y6C2	EMILIN1	106667	10	12	14	APAPASAPPGPSEELLR	R	Q	0.997	51.1	25.7	16.2	51.1	0	2	0	0	2	1659.87	5470.88	56670600	276	292
Mudpit_Aged L3_4 Posterior NP IAF	EMILIN-1 OS=Homo sapiens GN=EMILIN1 PE=1 SV=2	Q9Y6C2	EMILIN1	106667	10	12	14	LDTVAGGLQGLR	R	E	0.996	33.9	25.6	15.1	33.9	0	1	0	0	2	1199.67	5917.39	3592870	737	748
Mudpit_Aged L3_4 Posterior NP IAF	EMILIN-1 OS=Homo sapiens GN=EMILIN1 PE=1 SV=2	Q9Y6C2	EMILIN1	106667	10	12	14	LDVVAGSVTVLSGR	R	R	0.991	37.4	27.9	15.3	37.4	0	1	0	0	2	1372.78	7289.34	3533810	369	382
Mudpit_Aged L3_4 Posterior NP IAF	EMILIN-1 OS=Homo sapiens GN=EMILIN1 PE=1 SV=2	Q9Y6C2	EMILIN1	106667	10	12	14	LLASVEER	K	Q	0.99	39.1	29.2	30.3	24.2	0	1	0	0	2	916.51	2716.58	23471900	329	336
Mudpit_Aged L3_4 Posterior NP IAF	EMILIN-1 OS=Homo sapiens GN=EMILIN1 PE=1 SV=2	Q9Y6C2	EMILIN1	106667	10	12	14	LQQEATEHATESEER	R	F	0.997	82.5	25	18.2	82.5	0	1	1	0	2	1757.79	1979.27	7287860	692	706
Mudpit_Aged L3_4 Posterior NP IAF	EMILIN-1 OS=Homo sapiens GN=EMILIN1 PE=1 SV=2	Q9Y6C2	EMILIN1	106667	10	12	14	LVGSGLHTVEAAGEAR	R	Q	0.953	37.4	26.5	15.3	37.4	0	0	1	0	2	1566.82	4496.93	17889500	513	528
Mudpit_Aged L3_4 Posterior NP IAF	EMILIN-1 OS=Homo sapiens GN=EMILIN1 PE=1 SV=2	Q9Y6C2	EMILIN1	106667	10	12	14	QATLEGLQEVVGR	R	L	0.991	33.9	26	15.1	33.9	0	1	0	0	2	1399.75	6622.92	19745200	529	541
Mudpit_Aged L3_4 Posterior NP IAF	EMILIN-1 OS=Homo sapiens GN=EMILIN1 PE=1 SV=2	Q9Y6C2	EMILIN1	106667	10	12	14	SEPGTVPFDR	R	V	0.983	29.1	26.2	14.8	29.1	0	1	0	0	2	1104.53	3772.89	13976000	882	891
Mudpit_Aged L3_4 Posterior NP IAF	EMILIN-1 OS=Homo sapiens GN=EMILIN1 PE=1 SV=2	Q9Y6C2	EMILIN1	106667	10	12	14	VDAQDETAAEFTLR	R	L	0.997	94.2	33.7	18.9	94.2	0	2	0	0	2	1565.74	5991.7	6081560	546	559
Mudpit_Aged L3_4 Posterior NP IAF	EMILIN-1 OS=Homo sapiens GN=EMILIN1 PE=1 SV=2	Q9Y6C2	EMILIN1	106667	10	12	14	VLLNDGGYYDPETGVFTAPLAGR	R	Y	0.997	72.7	26.2	17.5	72.7	0	1	1	0	2	2425.2	9067.84	18729300	892	914
Mudpit_Aged L3_4 Posterior NP IAF	Inhibin, beta A (Activin A, activin AB alpha polypeptide) OS=Homo sapiens GN=INHBA PE=2 SV=1	A4D1W7,P08476,Q53H39	INHBA	47442.6	7	7	16	AALLNAIR	K	K	0.99	47.7	25	47.1	16.6	0	1	0	0	2	841.525	5164.24	7844100	81	88
Mudpit_Aged L3_4 Posterior NP IAF	Inhibin, beta A (Activin A, activin AB alpha polypeptide) OS=Homo sapiens GN=INHBA PE=2 SV=1	A4D1W7,P08476,Q53H39	INHBA	47442.6	7	7	16	AEVWLFLK	R	V	0.99	39.7	25	15.5	39.7	0	2	0	0	2	1005.58	9102.82	16770600	153	160
Mudpit_Aged L3_4 Posterior NP IAF	Inhibin, beta A (Activin A, activin AB alpha polypeptide) OS=Homo sapiens GN=INHBA PE=2 SV=1	A4D1W7,P08476,Q53H39	INHBA	47442.6	7	7	16	DVPNSQPEMVEAVK	K	K	0.991	35	25.4	15.2	35	0	1	0	0	2	1542.75	4734.06	5069470	46	59
Mudpit_Aged L3_4 Posterior NP IAF	Inhibin, beta A (Activin A, activin AB alpha polypeptide) OS=Homo sapiens GN=INHBA PE=2 SV=1	A4D1W7,P08476,Q53H39	INHBA	47442.6	7	7	16	EGSDLSVVER	K	A	0.997	72.2	27.3	22	67.8	0	8	0	0	2	1090.54	3985.26	73298400	143	152
Mudpit_Aged L3_4 Posterior NP IAF	Inhibin, beta A (Activin A, activin AB alpha polypeptide) OS=Homo sapiens GN=INHBA PE=2 SV=1	A4D1W7,P08476,Q53H39	INHBA	47442.6	7	7	16	RPDVTQPVPK	K	A	0.961	28.4	25.7	14.8	28.4	0	1	0	0	2	1136.64	2561.9	4183210	71	80
Mudpit_Aged L3_4 Posterior NP IAF	Inhibin, beta A (Activin A, activin AB alpha polypeptide) OS=Homo sapiens GN=INHBA PE=2 SV=1	A4D1W7,P08476,Q53H39	INHBA	47442.6	7	7	16	SELLLSEK	R	V	0.99	41.5	25.9	16.8	40.3	0	2	0	0	2	918.514	3940.9	31857300	202	209
Mudpit_Aged L3_4 Posterior NP IAF	Inhibin, beta A (Activin A, activin AB alpha polypeptide) OS=Homo sapiens GN=INHBA PE=2 SV=1	A4D1W7,P08476,Q53H39	INHBA	47442.6	7	7	16	STWHVFPVSSSIQR	K	L	0.985	41.9	26.8	15.6	41.9	0	0	1	0	2	1630.83	7263.27	13087900	216	229
Mudpit_Aged L3_4 Posterior NP IAF	HHIP-like protein 2 OS=Homo sapiens GN=HHIPL2 PE=1 SV=1	Q6UWX4	HHIPL2	80782.2	3	3	4	LEQPFLDLK	R	N	0.997	47	29.8	21.5	41.5	0	1	0	0	2	1102.61	6711.79	7086030	251	259
Mudpit_Aged L3_4 Posterior NP IAF	HHIP-like protein 2 OS=Homo sapiens GN=HHIPL2 PE=1 SV=1	Q6UWX4	HHIPL2	80782.2	3	3	4	LMALQEDR	R	K	0.984	31.8	27.2	22.1	24.6	0	1	0	0	2	975.493	3227.86	5997570	528	535
Mudpit_Aged L3_4 Posterior NP IAF	HHIP-like protein 2 OS=Homo sapiens GN=HHIPL2 PE=1 SV=1	Q6UWX4	HHIPL2	80782.2	3	3	4	NIVLTTPWIGDER	K	G	0.992	32.3	26.5	15	32.3	0	2	0	0	2	1513.8	8679.4	9735730	260	272
Mudpit_Aged L3_4 Posterior NP IAF	Angiopoietin-related protein 4 OS=Homo sapiens GN=ANGPTL4 PE=1 SV=2	Q9BY76	ANGPTL4	45214	2	3	3	MTSDGGWTVIQR	K	R	0.997	52.1	25.8	16.3	52.1	0	2	0	0	2	1366.64	5356.98	6845970	218	229
Mudpit_Aged L3_4 Posterior NP IAF	Angiopoietin-related protein 4 OS=Homo sapiens GN=ANGPTL4 PE=1 SV=2	Q9BY76	ANGPTL4	45214	2	3	3	VDPEVLHSLQTQLK	R	A	0.997	48	25	16	48	0	1	0	0	2	1606.88	8706.22	2101970	97	110
Mudpit_Aged L3_4 Posterior NP IAF	Ficolin-2 OS=Homo sapiens GN=FCN2 PE=1 SV=2	Q15485	FCN2	34001.6	2	2	2	VDGSVDFYR	R	D	0.989	40.4	32.3	15.5	40.4	0	1	0	0	2	1057.49	4319.39	17055000	149	157
Mudpit_Aged L3_4 Posterior NP IAF	Ficolin-2 OS=Homo sapiens GN=FCN2 PE=1 SV=2	Q15485	FCN2	34001.6	2	2	2	VDLVDFEDNYQFAK	R	Y	0.997	101	25	19.3	101	0	1	0	0	2	1702.8	8555.26	4479430	193	206
Mudpit_Aged L3_4 Posterior NP IAF	Annexin A1 OS=Homo sapiens GN=ANXA1 PE=1 SV=2	P04083,Q5TZZ9	ANXA1	38715.9	8	9	13	DITSDTSGDFR	K	N	0.982	29.1	25	14.8	29.1	0	1	0	0	2	1213.53	3998.81	3690650	167	177
Mudpit_Aged L3_4 Posterior NP IAF	Annexin A1 OS=Homo sapiens GN=ANXA1 PE=1 SV=2	P04083,Q5TZZ9	ANXA1	38715.9	8	9	13	GLGTDEDTLIEILASR	K	T	0.997	139	27.1	21.7	139	0	2	1	0	2	1702.89	9210.22	43067400	129	144
Mudpit_Aged L3_4 Posterior NP IAF	Annexin A1 OS=Homo sapiens GN=ANXA1 PE=1 SV=2	P04083,Q5TZZ9	ANXA1	38715.9	8	9	13	GTDVNVFNTILTTR	K	S	0.997	98.9	26.8	19.2	98.9	0	3	0	0	2	1550.82	8948.54	21135500	215	228
Mudpit_Aged L3_4 Posterior NP IAF	Annexin A1 OS=Homo sapiens GN=ANXA1 PE=1 SV=2	P04083,Q5TZZ9	ANXA1	38715.9	8	9	13	GVDEATIIDILTK	K	R	0.997	56	25.7	16.5	56	0	2	0	0	2	1387.77	9225.64	78741300	59	71
Mudpit_Aged L3_4 Posterior NP IAF	Annexin A1 OS=Homo sapiens GN=ANXA1 PE=1 SV=2	P04083,Q5TZZ9	ANXA1	38715.9	8	9	13	NALLSLAK	R	G	0.99	34.4	27.9	15.1	34.4	0	1	0	0	2	829.514	5864	5179690	178	185
Mudpit_Aged L3_4 Posterior NP IAF	Annexin A1 OS=Homo sapiens GN=ANXA1 PE=1 SV=2	P04083,Q5TZZ9	ANXA1	38715.9	8	9	13	SEDFGVNEDLADSDAR	R	A	0.997	119	25	20.4	119	0	1	0	0	2	1739.74	5673.02	3870620	189	204
Mudpit_Aged L3_4 Posterior NP IAF	Annexin A1 OS=Homo sapiens GN=ANXA1 PE=1 SV=2	P04083,Q5TZZ9	ANXA1	38715.9	8	9	13	SEIDMNDIK	R	A	0.997	38.3	25	15.4	38.3	0	1	0	0	2	1064.49	4452.61	4952640	304	312
Mudpit_Aged L3_4 Posterior NP IAF	Annexin A1 OS=Homo sapiens GN=ANXA1 PE=1 SV=2	P04083,Q5TZZ9	ANXA1	38715.9	8	9	13	TPAQFDADELR	K	A	0.997	66.4	25.7	17.1	66.4	0	1	0	0	2	1262.6	4793.87	10681700	114	124
Mudpit_Aged L3_4 Posterior NP IAF	Gelsolin OS=Homo sapiens GN=GSN PE=1 SV=1	P06396	GSN	85697.8	16	22	63	AGALNSNDAFVLK	K	T	0.997	80.8	26.8	18	80.8	0	4	0	0	2	1319.7	5991.96	26168600	585	597
Mudpit_Aged L3_4 Posterior NP IAF	Gelsolin OS=Homo sapiens GN=GSN PE=1 SV=1	P06396	GSN	85697.8	16	22	63	AGKEPGLQIWR	K	V	0.985	48.8	25.7	16.1	48.8	0	0	1	0	2	1254.7	7911.06	2129840	62	72
Mudpit_Aged L3_4 Posterior NP IAF	Gelsolin OS=Homo sapiens GN=GSN PE=1 SV=1	P06396	GSN	85697.8	16	22	63	AQPVQVAEGSEPDGFWEALGGK	R	A	0.997	93	26.6	18.8	93	0	3	3	0	2	2272.09	8957.47	205908000	627	648
Mudpit_Aged L3_4 Posterior NP IAF	Gelsolin OS=Homo sapiens GN=GSN PE=1 SV=1	P06396	GSN	85697.8	16	22	63	DPDQTDGLGLSYLSSHIANVER	R	V	0.997	112	26.1	20	112	0	1	3	0	2	2387.15	8511.35	140135000	398	419
Mudpit_Aged L3_4 Posterior NP IAF	Gelsolin OS=Homo sapiens GN=GSN PE=1 SV=1	P06396	GSN	85697.8	16	22	63	EGGQTAPASTR	R	L	0.997	34.9	25	15.2	34.9	0	1	0	0	2	1074.52	1226.85	325029	554	564
Mudpit_Aged L3_4 Posterior NP IAF	Gelsolin OS=Homo sapiens GN=GSN PE=1 SV=1	P06396	GSN	85697.8	16	22	63	EPGLQIWR	K	V	0.99	37.5	25.7	17.2	35.5	0	5	0	0	2	998.542	6701.08	327045000	65	72
Mudpit_Aged L3_4 Posterior NP IAF	Gelsolin OS=Homo sapiens GN=GSN PE=1 SV=1	P06396	GSN	85697.8	16	22	63	EVQGFESATFLGYFK	R	S	0.997	108	26.2	19.8	108	0	10	0	0	2	1722.84	9759.89	292308000	148	162
Mudpit_Aged L3_4 Posterior NP IAF	Gelsolin OS=Homo sapiens GN=GSN PE=1 SV=1	P06396	GSN	85697.8	16	22	63	FDLVPVPTNLYGDFFTGDAYVILK	K	T	0.994	54.9	25.1	16.4	54.9	0	0	2	0	2	2704.39	9481.44	4572660	76	99
Mudpit_Aged L3_4 Posterior NP IAF	Gelsolin OS=Homo sapiens GN=GSN PE=1 SV=1	P06396	GSN	85697.8	16	22	63	GASQAGAPQGR	R	V	0.971	26	25	15.6	25.1	0	1	0	0	2	999.497	1210.99	125416	33	43
Mudpit_Aged L3_4 Posterior NP IAF	Gelsolin OS=Homo sapiens GN=GSN PE=1 SV=1	P06396	GSN	85697.8	16	22	63	HVVPNEVVVQR	K	L	0.989	48.2	26.7	16	48.2	0	1	2	0	2	1275.72	3440.78	95085700	178	188
Mudpit_Aged L3_4 Posterior NP IAF	Gelsolin OS=Homo sapiens GN=GSN PE=1 SV=1	P06396	GSN	85697.8	16	22	63	NWRDPDQTDGLGLSYLSSHIANVER	K	V	0.989	40	25	15.5	40	0	0	0	1	2	2843.37	10495.8	1360100	395	419
Mudpit_Aged L3_4 Posterior NP IAF	Gelsolin OS=Homo sapiens GN=GSN PE=1 SV=1	P06396	GSN	85697.8	16	22	63	QTQVSVLPEGGETPLFK	K	Q	0.997	89.8	27.1	18.6	89.8	0	5	1	0	2	1829.96	7624.77	80274700	374	390
Mudpit_Aged L3_4 Posterior NP IAF	Gelsolin OS=Homo sapiens GN=GSN PE=1 SV=1	P06396	GSN	85697.8	16	22	63	TGAQELLR	K	V	0.99	70.3	29.3	50.8	36.9	0	4	0	0	2	887.495	3026.02	62449100	616	623
Mudpit_Aged L3_4 Posterior NP IAF	Gelsolin OS=Homo sapiens GN=GSN PE=1 SV=1	P06396	GSN	85697.8	16	22	63	TPSAAYLWVGTGASEAEK	K	T	0.997	108	30.7	19.8	108	0	7	1	0	2	1837.9	7588.26	54234700	598	615
Mudpit_Aged L3_4 Posterior NP IAF	Gelsolin OS=Homo sapiens GN=GSN PE=1 SV=1	P06396	GSN	85697.8	16	22	63	VPFDAATLHTSTAMAAQHGMDDDGTGQK	R	Q	0.976	54.4	25	16.4	54.4	0	0	2	0	2	2873.28	8744.3	4761970	420	447
Mudpit_Aged L3_4 Posterior NP IAF	Gelsolin OS=Homo sapiens GN=GSN PE=1 SV=1	P06396	GSN	85697.8	16	22	63	VPVDPATYGQFYGGDSYIILYNYR	K	H	0.997	78.4	25.4	17.9	78.4	0	2	3	0	2	2771.34	9191.9	66113900	458	481
Mudpit_Aged L3_4 Posterior NP IAF	cDNA FLJ61564, highly similar to Plexin domain-containing protein 2 OS=Homo sapiens PE=2 SV=1	B4E367,Q6UX71	PLXDC2	59583	3	3	4	DLWVNIDQMEK	R	D	0.981	27.6	25	20.4	21.9	0	1	0	0	2	1406.66	6834.14	6913020	130	140
Mudpit_Aged L3_4 Posterior NP IAF	cDNA FLJ61564, highly similar to Plexin domain-containing protein 2 OS=Homo sapiens PE=2 SV=1	B4E367,Q6UX71	PLXDC2	59583	3	3	4	EIPVLVTQISSTNHPVK	K	V	0.953	32.1	25	15	32.1	0	0	1	0	2	1862.04	8592.57	4850700	261	277
Mudpit_Aged L3_4 Posterior NP IAF	cDNA FLJ61564, highly similar to Plexin domain-containing protein 2 OS=Homo sapiens PE=2 SV=1	B4E367,Q6UX71	PLXDC2	59583	3	3	4	VGLSDAFVVVHR	K	I	0.995	59.7	25.7	16.7	59.7	0	0	2	0	2	1298.72	7956.9	11452000	278	289
Mudpit_Aged L3_4 Posterior NP IAF	Serpin peptidase inhibitor, clade A (Alpha-1 antiproteinase, antitrypsin), member 4, isoform CRA_a OS=Homo sapiens GN=SERPINA4 PE=3 SV=1	A0A024R6I9,B2R815,P29622	SERPINA4	48544	13	18	46	ATLDVDEAGTEAAAATSFAIK	K	F	0.997	134	26.4	21.4	134	0	8	2	0	2	2052.01	8297.23	45350600	366	386
Mudpit_Aged L3_4 Posterior NP IAF	Serpin peptidase inhibitor, clade A (Alpha-1 antiproteinase, antitrypsin), member 4, isoform CRA_a OS=Homo sapiens GN=SERPINA4 PE=3 SV=1	A0A024R6I9,B2R815,P29622	SERPINA4	48544	13	18	46	DFYVDENTTVR	K	V	0.997	48.1	25	16	48.1	0	3	0	0	2	1358.62	5069.49	52877600	232	242
Mudpit_Aged L3_4 Posterior NP IAF	Serpin peptidase inhibitor, clade A (Alpha-1 antiproteinase, antitrypsin), member 4, isoform CRA_a OS=Homo sapiens GN=SERPINA4 PE=3 SV=1	A0A024R6I9,B2R815,P29622	SERPINA4	48544	13	18	46	EIEEVLTPEMLMR	R	W	0.997	62	27	16.9	62	0	5	1	0	2	1589.79	7909.45	133124000	288	300
Mudpit_Aged L3_4 Posterior NP IAF	Serpin peptidase inhibitor, clade A (Alpha-1 antiproteinase, antitrypsin), member 4, isoform CRA_a OS=Homo sapiens GN=SERPINA4 PE=3 SV=1	A0A024R6I9,B2R815,P29622	SERPINA4	48544	13	18	46	FSISGSYVLDQILPR	K	L	0.997	113	26.1	20.1	113	0	2	1	0	2	1694.91	9182.65	91904200	321	335
Mudpit_Aged L3_4 Posterior NP IAF	Serpin peptidase inhibitor, clade A (Alpha-1 antiproteinase, antitrypsin), member 4, isoform CRA_a OS=Homo sapiens GN=SERPINA4 PE=3 SV=1	A0A024R6I9,B2R815,P29622	SERPINA4	48544	13	18	46	FYYLIASETPGK	R	N	0.997	49.4	26.4	16.1	49.4	0	3	0	0	2	1388.71	6814.38	21658800	62	73
Mudpit_Aged L3_4 Posterior NP IAF	Serpin peptidase inhibitor, clade A (Alpha-1 antiproteinase, antitrypsin), member 4, isoform CRA_a OS=Homo sapiens GN=SERPINA4 PE=3 SV=1	A0A024R6I9,B2R815,P29622	SERPINA4	48544	13	18	46	GDATVFFILPNQGK	K	M	0.997	54	26.2	16.4	54	0	3	0	0	2	1506.8	8955.33	46661800	272	285
Mudpit_Aged L3_4 Posterior NP IAF	Serpin peptidase inhibitor, clade A (Alpha-1 antiproteinase, antitrypsin), member 4, isoform CRA_a OS=Homo sapiens GN=SERPINA4 PE=3 SV=1	A0A024R6I9,B2R815,P29622	SERPINA4	48544	13	18	46	IAPANADFAFR	K	F	0.997	54	26.1	16.4	54	0	4	0	0	2	1192.61	6112.42	25763800	51	61
[truncated: 10,010 more rows]
