# Supplementary material for: Peptide Location Fingerprinting Reveals Tissue Region-specific Differences in Protein Structures in an Ageing Human Organ
Source: Preprints.org preprint supplement (doi:10.20944/preprints202107.0670.v1), 2021-07-29
Supplement: Supplementary file 2 [file Table S2_Peptide Report for Left Lateral inner AF.xlsx]

## Sheet: Peptide Report for Left IAF onl
Table S2: MS/MS-identified peptides and protein in young and aged left lateral inner AF
MS/MS sample name	Protein name	Uniprot accession numbers	Alternate IDs	Protein molecular weight (Da)	Exclusive unique peptide count	Exclusive unique spectrum count	Exclusive spectrum count	Peptide sequence	Previous amino acid	Next amino acid	Best Peptide identification probability	Best Mascot Ion Score	Best Mascot Identity Score	Best Mascot Homology Score	Best Mascot Delta Ion Score	Number of identified +1H spectra	Number of identified +2H spectra	Number of identified +3H spectra	Number of identified +4H spectra	Number of enzymatic termini	Calculated +1H Peptide Mass (AMU)	Median Retention Time	Total TIC	Peptide start index	Peptide stop index
Mudpit_Aged_L3_4Left_IAF	Fibulin 5, isoform CRA_b OS=Homo sapiens GN=FBLN5 PE=4 SV=1	A0A024R6G3,B3KQA8,G3V4U0,G3XA98,Q86TV4,Q9UBX5	FBLN5	50180.1	2	2	2	DQPFTILYR	R	D	0.997	38.7	26.7	15.4	38.7	0	1	0	0	2	1152.6	6643.89	5158620	343	351
Mudpit_Aged_L3_4Left_IAF	Fibulin 5, isoform CRA_b OS=Homo sapiens GN=FBLN5 PE=4 SV=1	A0A024R6G3,B3KQA8,G3V4U0,G3XA98,Q86TV4,Q9UBX5	FBLN5	50180.1	2	2	2	SVPADIFQMQATTR	R	Y	0.972	29.8	26.7	14.9	29.8	0	1	0	0	2	1564.78	6242.09	5002250	360	373
Mudpit_Aged_L3_4Left_IAF	Prelamin-A/C OS=Homo sapiens GN=LMNA PE=1 SV=1	P02545	LMNA	74140.7	9	11	11	AGQVVTIWAAGAGATHSPPTDLVWK	K	A	0.997	79.8	26	18	79.8	0	1	1	0	2	2533.32	7413.07	11900000	491	515
Mudpit_Aged_L3_4Left_IAF	Prelamin-A/C OS=Homo sapiens GN=LMNA PE=1 SV=1	P02545	LMNA	74140.7	9	11	11	DLEDSLAR	R	E	0.987	27.8	25.5	19.8	22.7	0	1	0	0	2	918.453	3281.61	4245960	322	329
Mudpit_Aged_L3_4Left_IAF	Prelamin-A/C OS=Homo sapiens GN=LMNA PE=1 SV=1	P02545	LMNA	74140.7	9	11	11	EDLQELNDR	K	L	0.997	44.3	25	15.8	44.3	0	1	0	0	2	1131.53	2137.91	6850650	33	41
Mudpit_Aged_L3_4Left_IAF	Prelamin-A/C OS=Homo sapiens GN=LMNA PE=1 SV=1	P02545	LMNA	74140.7	9	11	11	ITESEEVVSR	R	E	0.997	50.1	27.4	16.1	50.1	0	1	0	0	2	1148.58	1458.46	8990260	63	72
Mudpit_Aged_L3_4Left_IAF	Prelamin-A/C OS=Homo sapiens GN=LMNA PE=1 SV=1	P02545	LMNA	74140.7	9	11	11	LALDMEIHAYR	K	K	0.997	55.7	27.8	16.5	55.7	0	0	2	0	2	1347.67	4499.7	18200000	367	377
Mudpit_Aged_L3_4Left_IAF	Prelamin-A/C OS=Homo sapiens GN=LMNA PE=1 SV=1	P02545	LMNA	74140.7	9	11	11	LRDLEDSLAR	K	E	0.99	46.4	27.7	15.9	46.4	0	0	1	0	2	1187.64	2524.15	5002180	320	329
Mudpit_Aged_L3_4Left_IAF	Prelamin-A/C OS=Homo sapiens GN=LMNA PE=1 SV=1	P02545	LMNA	74140.7	9	11	11	SLETENAGLR	R	L	0.987	31	27.7	14.9	31	0	1	0	0	2	1089.55	1680.01	18000000	51	60
Mudpit_Aged_L3_4Left_IAF	Prelamin-A/C OS=Homo sapiens GN=LMNA PE=1 SV=1	P02545	LMNA	74140.7	9	11	11	SVGGSGGGSFGDNLVTR	R	S	0.997	98.3	29.8	19.1	98.3	0	1	0	0	2	1566.75	3972.18	8549470	628	644
Mudpit_Aged_L3_4Left_IAF	Prelamin-A/C OS=Homo sapiens GN=LMNA PE=1 SV=1	P02545	LMNA	74140.7	9	11	11	VAVEEVDEEGK	R	F	0.997	59.6	25	16.7	59.6	0	1	0	0	2	1203.57	1645.97	6551540	440	450
Mudpit_Aged_L3_4Left_IAF	Cell proliferation-inducing protein 41 OS=Homo sapiens PE=2 SV=1	A1KY36		73455.6	2	2	2	GGNVWVALFK	K	N	0.987	36.9	26.1	15.3	36.9	0	1	0	0	2	1090.6	7418.13	4379170	672	681
Mudpit_Aged_L3_4Left_IAF	Cell proliferation-inducing protein 41 OS=Homo sapiens PE=2 SV=1	A1KY36		73455.6	2	2	2	NNEPVMYTYDEYK	K	K	0.997	41.4	25	15.6	41.4	0	1	0	0	2	1665.71	4728.82	5168710	682	694
Mudpit_Aged_L3_4Left_IAF	Vitamin D-binding protein OS=Homo sapiens GN=GC PE=1 SV=1	D6RF35	GC	53021.2	10	16	40	EDFTSLSLVLYSR	K	K	0.997	95.3	27.1	19	95.3	0	2	1	0	2	1529.78	8585.77	21600000	38	50
Mudpit_Aged_L3_4Left_IAF	Vitamin D-binding protein OS=Homo sapiens GN=GC PE=1 SV=1	D6RF35	GC	53021.2	10	16	40	ELSSFIDK	K	G	0.99	43.7	25.8	15.7	43.7	0	4	0	0	2	938.483	3769.14	21500000	395	402
Mudpit_Aged_L3_4Left_IAF	Vitamin D-binding protein OS=Homo sapiens GN=GC PE=1 SV=1	D6RF35	GC	53021.2	10	16	40	FPSGTFEQVSQLVK	K	E	0.997	106	27.1	19.6	106	0	5	2	0	2	1566.82	6968.34	71600000	52	65
Mudpit_Aged_L3_4Left_IAF	Vitamin D-binding protein OS=Homo sapiens GN=GC PE=1 SV=1	D6RF35	GC	53021.2	10	16	40	GQELCADYSENTFTEYK	K	K	0.991	29.5	25	14.8	29.5	0	2	0	0	2	2055.85	5506.76	9325560	403	419
Mudpit_Aged_L3_4Left_IAF	Vitamin D-binding protein OS=Homo sapiens GN=GC PE=1 SV=1	D6RF35	GC	53021.2	10	16	40	HQPQEFPTYVEPTNDEICEAFR	K	K	0.997	50.2	31.2	16.1	50.2	0	1	2	0	2	2708.19	6851.07	10100000	128	149
Mudpit_Aged_L3_4Left_IAF	Vitamin D-binding protein OS=Homo sapiens GN=GC PE=1 SV=1	D6RF35	GC	53021.2	10	16	40	KELSSFIDK	K	G	0.997	55	25.5	35.2	36.3	0	1	2	0	2	1066.58	2009.44	73100000	394	402
Mudpit_Aged_L3_4Left_IAF	Vitamin D-binding protein OS=Homo sapiens GN=GC PE=1 SV=1	D6RF35	GC	53021.2	10	16	40	KFPSGTFEQVSQLVK	R	E	0.982	37.2	25.4	15.3	37.2	0	0	1	0	2	1694.91	5862.54	7364500	51	65
Mudpit_Aged_L3_4Left_IAF	Vitamin D-binding protein OS=Homo sapiens GN=GC PE=1 SV=1	D6RF35	GC	53021.2	10	16	40	LPDATPTELAK	K	L	0.997	55.5	25	16.5	0	0	4	0	0	2	1155.63	3371.86	41600000	430	440
Mudpit_Aged_L3_4Left_IAF	Vitamin D-binding protein OS=Homo sapiens GN=GC PE=1 SV=1	D6RF35	GC	53021.2	10	16	40	THLPEVFLSK	R	V	0.997	52.4	25.1	16.3	52.4	0	3	4	0	2	1170.65	4218.17	83300000	354	363
Mudpit_Aged_L3_4Left_IAF	Vitamin D-binding protein OS=Homo sapiens GN=GC PE=1 SV=1	D6RF35	GC	53021.2	10	16	40	VPTADLEDVLPLAEDITNILSK	K	C	0.997	93.7	25	18.9	93.7	0	3	3	0	2	2366.27	9356.64	108000000	243	264
Mudpit_Aged_L3_4Left_IAF	Keratin, type I cytoskeletal 14 OS=Homo sapiens GN=KRT14 PE=1 SV=4	P02533	KRT14	51562.5	9	10	10	ALEEANADLEVK	R	I	0.997	94.6	27.3	18.9	94.6	0	1	0	0	2	1301.66	3244.17	16900000	135	146
Mudpit_Aged_L3_4Left_IAF	Keratin, type I cytoskeletal 14 OS=Homo sapiens GN=KRT14 PE=1 SV=4	P02533	KRT14	51562.5	9	10	10	APSTYGGGLSVSSSR	R	F	0.997	82.7	26.5	18.2	82.7	0	1	0	0	2	1425.7	2388.18	13700000	42	56
Mudpit_Aged_L3_4Left_IAF	Keratin, type I cytoskeletal 14 OS=Homo sapiens GN=KRT14 PE=1 SV=4	P02533	KRT14	51562.5	9	10	10	ASLENSLEETKGR	K	Y	0.993	45.9	27	15.9	45.9	0	0	1	0	2	1433.72	1660.76	4214320	353	365
Mudpit_Aged_L3_4Left_IAF	Keratin, type I cytoskeletal 14 OS=Homo sapiens GN=KRT14 PE=1 SV=4	P02533	KRT14	51562.5	9	10	10	DAEEWFFTKTEELNR	K	E	0.989	41	25	15.6	41	0	0	1	0	2	1914.89	7139.08	6700580	301	315
Mudpit_Aged_L3_4Left_IAF	Keratin, type I cytoskeletal 14 OS=Homo sapiens GN=KRT14 PE=1 SV=4	P02533	KRT14	51562.5	9	10	10	EVATNSELVQSGK	R	S	0.997	76.9	27.7	17.8	76.9	0	1	0	0	2	1361.69	1601.62	5575850	316	328
Mudpit_Aged_L3_4Left_IAF	Keratin, type I cytoskeletal 14 OS=Homo sapiens GN=KRT14 PE=1 SV=4	P02533	KRT14	51562.5	9	10	10	ILNEMRDQYEK	R	M	0.997	56.3	25.8	18.7	54.1	0	1	0	0	2	1438.7	1873.7	5425810	283	293
Mudpit_Aged_L3_4Left_IAF	Keratin, type I cytoskeletal 14 OS=Homo sapiens GN=KRT14 PE=1 SV=4	P02533	KRT14	51562.5	9	10	10	ILTATVDNANVLLQIDNAR	K	L	0.997	166	25	23.4	166	0	1	1	0	2	2054.12	7700.02	11100000	176	194
Mudpit_Aged_L3_4Left_IAF	Keratin, type I cytoskeletal 14 OS=Homo sapiens GN=KRT14 PE=1 SV=4	P02533	KRT14	51562.5	9	10	10	TKYETELNLR	R	M	0.956	31.8	26.4	15	31.8	0	0	1	0	2	1266.67	2061.46	18000000	202	211
Mudpit_Aged_L3_4Left_IAF	Keratin, type I cytoskeletal 14 OS=Homo sapiens GN=KRT14 PE=1 SV=4	P02533	KRT14	51562.5	9	10	10	TRLEQEIATYR	K	R	0.992	49.8	25.8	16.1	49.8	0	0	1	0	2	1379.73	2895.57	4011930	406	416
Mudpit_Aged_L3_4Left_IAF	cDNA PSEC0172 fis, clone PLACE1011835, highly similar to Procollagen C-endopeptidase enhancer 2 OS=Homo sapiens PE=2 SV=1	B3KQT8,Q53EK6,Q9UKZ9	PCOLCE2	45717.3	8	14	48	DGSLHATVSIINIYK	R	E	0.997	91.8	27.2	18.7	91.8	0	6	7	0	2	1630.88	6482.56	72100000	329	343
Mudpit_Aged_L3_4Left_IAF	cDNA PSEC0172 fis, clone PLACE1011835, highly similar to Procollagen C-endopeptidase enhancer 2 OS=Homo sapiens PE=2 SV=1	B3KQT8,Q53EK6,Q9UKZ9	PCOLCE2	45717.3	8	14	48	EGNLAIQQAGK	K	N	0.996	39.7	25	15.5	39.7	0	1	0	0	2	1128.6	2213.85	9667630	344	354
Mudpit_Aged_L3_4Left_IAF	cDNA PSEC0172 fis, clone PLACE1011835, highly similar to Procollagen C-endopeptidase enhancer 2 OS=Homo sapiens PE=2 SV=1	B3KQT8,Q53EK6,Q9UKZ9	PCOLCE2	45717.3	8	14	48	FIDLESDNLCR	R	Y	0.997	52.4	25	17.4	51.2	0	7	0	0	2	1382.63	6076	59200000	77	87
Mudpit_Aged_L3_4Left_IAF	cDNA PSEC0172 fis, clone PLACE1011835, highly similar to Procollagen C-endopeptidase enhancer 2 OS=Homo sapiens PE=2 SV=1	B3KQT8,Q53EK6,Q9UKZ9	PCOLCE2	45717.3	8	14	48	GLNYIIMGQVGEDGR	R	G	0.997	103	27.5	19.4	103	0	12	8	0	2	1621.8	6449.36	137000000	373	387
Mudpit_Aged_L3_4Left_IAF	cDNA PSEC0172 fis, clone PLACE1011835, highly similar to Procollagen C-endopeptidase enhancer 2 OS=Homo sapiens PE=2 SV=1	B3KQT8,Q53EK6,Q9UKZ9	PCOLCE2	45717.3	8	14	48	IMPNSFIMMFK	K	T	0.997	34.6	26.1	15.2	34.6	0	1	0	0	2	1358.67	8551	2707450	390	400
Mudpit_Aged_L3_4Left_IAF	cDNA PSEC0172 fis, clone PLACE1011835, highly similar to Procollagen C-endopeptidase enhancer 2 OS=Homo sapiens PE=2 SV=1	B3KQT8,Q53EK6,Q9UKZ9	PCOLCE2	45717.3	8	14	48	TGTLEGNYCSSDFVLAGTVITTITR	R	D	0.997	139	26.1	21.7	139	0	1	1	0	2	2677.3	9129.23	17800000	304	328
Mudpit_Aged_L3_4Left_IAF	cDNA PSEC0172 fis, clone PLACE1011835, highly similar to Procollagen C-endopeptidase enhancer 2 OS=Homo sapiens PE=2 SV=1	B3KQT8,Q53EK6,Q9UKZ9	PCOLCE2	45717.3	8	14	48	YDFVDVYNGHANGQR	R	I	0.976	45.6	34.2	15.9	45.6	0	0	1	0	2	1754.79	4404.22	6194040	88	102
Mudpit_Aged_L3_4Left_IAF	cDNA PSEC0172 fis, clone PLACE1011835, highly similar to Procollagen C-endopeptidase enhancer 2 OS=Homo sapiens PE=2 SV=1	B3KQT8,Q53EK6,Q9UKZ9	PCOLCE2	45717.3	8	14	48	YDYVAVFNGGEVNDAR	R	R	0.997	96.5	25	19	96.5	0	2	1	0	2	1788.82	6330	19900000	210	225
Mudpit_Aged_L3_4Left_IAF	Epididymis luminal protein 4 OS=Homo sapiens GN=YWHAZ PE=2 SV=1	D0PNI1,P63104	YWHAZ	27745.9	6	8	11	DNLTLWTSDTQGDEAEAGEGGEN	R	-	0.973	29.9	25	14.9	29.9	0	1	0	0	2	2409	7823.49	467610	223	245
Mudpit_Aged_L3_4Left_IAF	Epididymis luminal protein 4 OS=Homo sapiens GN=YWHAZ PE=2 SV=1	D0PNI1,P63104	YWHAZ	27745.9	6	8	11	FLIPNASQAESK	K	V	0.997	46.6	27.3	15.9	46.6	0	1	0	0	2	1304.68	4321.22	8090280	104	115
Mudpit_Aged_L3_4Left_IAF	Epididymis luminal protein 4 OS=Homo sapiens GN=YWHAZ PE=2 SV=1	D0PNI1,P63104	YWHAZ	27745.9	6	8	11	GIVDQSQQAYQEAFEISK	K	K	0.997	107	25.8	19.7	107	0	2	0	0	2	2040.99	7148.63	6400130	140	157
Mudpit_Aged_L3_4Left_IAF	Epididymis luminal protein 4 OS=Homo sapiens GN=YWHAZ PE=2 SV=1	D0PNI1,P63104	YWHAZ	27745.9	6	8	11	SVTEQGAELSNEER	K	N	0.997	83.3	25	18.2	83.3	0	2	1	0	2	1548.71	1733.62	16700000	28	41
Mudpit_Aged_L3_4Left_IAF	Epididymis luminal protein 4 OS=Homo sapiens GN=YWHAZ PE=2 SV=1	D0PNI1,P63104	YWHAZ	27745.9	6	8	11	TAFDEAIAELDTLSEESYK	K	D	0.997	92.6	27.9	18.8	92.6	0	1	1	0	2	2131.99	9130.34	30900000	194	212
Mudpit_Aged_L3_4Left_IAF	Epididymis luminal protein 4 OS=Homo sapiens GN=YWHAZ PE=2 SV=1	D0PNI1,P63104	YWHAZ	27745.9	6	8	11	YLAEVAAGDDK	R	K	0.997	51.7	26.1	16.2	51.7	0	2	0	0	2	1151.56	2166.64	16500000	128	138
Mudpit_Aged_L3_4Left_IAF	cDNA FLJ14473 fis, clone MAMMA1001080, highly similar to Homo sapiens SNC73 protein (SNC73) mRNA OS=Homo sapiens PE=2 SV=1	Q96K68		53087.4	4	6	19	DASGVTFTWTPSSGK	R	S	0.997	94.8	26.2	18.9	94.8	0	3	0	0	2	1540.73	6085.18	51800000	295	309
Mudpit_Aged_L3_4Left_IAF	cDNA FLJ14473 fis, clone MAMMA1001080, highly similar to Homo sapiens SNC73 protein (SNC73) mRNA OS=Homo sapiens PE=2 SV=1	Q96K68		53087.4	4	6	19	GDTFSCMVGHEALPLAFTQK	K	T	0.997	63	25	16.9	63	0	2	0	0	2	2210.03	6742.49	10700000	449	468
Mudpit_Aged_L3_4Left_IAF	cDNA FLJ14473 fis, clone MAMMA1001080, highly similar to Homo sapiens SNC73 protein (SNC73) mRNA OS=Homo sapiens PE=2 SV=1	Q96K68		53087.4	4	6	19	QEPSQGTTTFAVTSILR	R	V	0.997	149	27.3	22.3	149	0	9	3	0	2	1835.95	6688.55	273000000	424	440
Mudpit_Aged_L3_4Left_IAF	cDNA FLJ14473 fis, clone MAMMA1001080, highly similar to Homo sapiens SNC73 protein (SNC73) mRNA OS=Homo sapiens PE=2 SV=1	Q96K68		53087.4	4	6	19	TPLTATLSK	K	S	0.997	59	26.3	19.5	56.2	0	2	0	0	2	931.546	2199.63	42700000	354	362
Mudpit_Aged_L3_4Left_IAF	Keratin, type II cytoskeletal 2 epidermal OS=Homo sapiens GN=KRT2 PE=1 SV=2	P35908	KRT2	65433.9	28	39	50	AAFGGSGGRGSSSGGGYSSGSSSYGSGGR	K	Q	0.997	150	25	22.4	150	0	2	2	0	2	2501.07	1273.29	12300000	516	544
Mudpit_Aged_L3_4Left_IAF	Keratin, type II cytoskeletal 2 epidermal OS=Homo sapiens GN=KRT2 PE=1 SV=2	P35908	KRT2	65433.9	28	39	50	DVDNAYMIK	K	V	0.997	38.7	25	15.4	38.7	0	2	0	0	2	1084.5	3093.8	18700000	288	296
Mudpit_Aged_L3_4Left_IAF	Keratin, type II cytoskeletal 2 epidermal OS=Homo sapiens GN=KRT2 PE=1 SV=2	P35908	KRT2	65433.9	28	39	50	DVDNAYMIKVELQSK	K	V	0.996	56.1	26.2	16.5	56.1	0	0	1	0	2	1768.88	4842.66	6158760	288	302
Mudpit_Aged_L3_4Left_IAF	Keratin, type II cytoskeletal 2 epidermal OS=Homo sapiens GN=KRT2 PE=1 SV=2	P35908	KRT2	65433.9	28	39	50	FASFIDKVR	K	F	0.997	57.7	26	30.7	43.6	0	1	1	0	2	1082.6	3536.09	35500000	189	197
Mudpit_Aged_L3_4Left_IAF	Keratin, type II cytoskeletal 2 epidermal OS=Homo sapiens GN=KRT2 PE=1 SV=2	P35908	KRT2	65433.9	28	39	50	FGGFGGPGGVGGLGGPGGFGPGGYPGGIHEVSVNQSLLQPLNVK	R	V	0.982	38.3	25	15.4	38.3	0	0	1	0	2	4092.07	8905.75	60500000	123	166
Mudpit_Aged_L3_4Left_IAF	Keratin, type II cytoskeletal 2 epidermal OS=Homo sapiens GN=KRT2 PE=1 SV=2	P35908	KRT2	65433.9	28	39	50	FGGFGGPGGVGGLGGPGGFGPGGYPGGIHEVSVNQSLLQPLNVKVDPEIQNVK	R	A	0.953	32.6	25	15	32.6	0	0	0	1	2	5114.61	8877.55	71100000	123	175
Mudpit_Aged_L3_4Left_IAF	Keratin, type II cytoskeletal 2 epidermal OS=Homo sapiens GN=KRT2 PE=1 SV=2	P35908	KRT2	65433.9	28	39	50	FLEQQNQVLQTK	R	W	0.997	79.3	32.5	18	79.3	0	2	0	0	2	1475.79	3658.92	28700000	198	209
Mudpit_Aged_L3_4Left_IAF	Keratin, type II cytoskeletal 2 epidermal OS=Homo sapiens GN=KRT2 PE=1 SV=2	P35908	KRT2	65433.9	28	39	50	GFSSGSAVVSGGSR	R	R	0.997	58.9	25.1	16.7	58.9	0	2	0	0	2	1254.61	1689.42	80700000	21	34
Mudpit_Aged_L3_4Left_IAF	Keratin, type II cytoskeletal 2 epidermal OS=Homo sapiens GN=KRT2 PE=1 SV=2	P35908	KRT2	65433.9	28	39	50	GGGFGGGSSFGGGSGFSGGGFGGGGFGGGR	R	F	0.997	45.5	25	15.8	45.5	0	1	0	0	2	2399.02	6761.35	863395	93	122
Mudpit_Aged_L3_4Left_IAF	Keratin, type II cytoskeletal 2 epidermal OS=Homo sapiens GN=KRT2 PE=1 SV=2	P35908	KRT2	65433.9	28	39	50	GGGGGGFRGFSSGSAVVSGGSR	R	R	0.997	60.3	25.2	16.8	60.3	0	0	1	0	2	1899.91	2883.76	6073550	13	34
Mudpit_Aged_L3_4Left_IAF	Keratin, type II cytoskeletal 2 epidermal OS=Homo sapiens GN=KRT2 PE=1 SV=2	P35908	KRT2	65433.9	28	39	50	IEISELNR	K	V	0.99	56	27.4	55.7	16.8	0	2	0	0	2	973.531	3213.58	12500000	394	401
Mudpit_Aged_L3_4Left_IAF	Keratin, type II cytoskeletal 2 epidermal OS=Homo sapiens GN=KRT2 PE=1 SV=2	P35908	KRT2	65433.9	28	39	50	LALDVEIATYR	K	K	0.997	59.6	26.8	37	39.3	0	1	0	0	2	1263.69	6459.12	11200000	471	481
Mudpit_Aged_L3_4Left_IAF	Keratin, type II cytoskeletal 2 epidermal OS=Homo sapiens GN=KRT2 PE=1 SV=2	P35908	KRT2	65433.9	28	39	50	LALDVEIATYRK	K	L	0.997	55.9	25	21.5	51	0	2	0	0	2	1391.79	5008.14	11300000	471	482
Mudpit_Aged_L3_4Left_IAF	Keratin, type II cytoskeletal 2 epidermal OS=Homo sapiens GN=KRT2 PE=1 SV=2	P35908	KRT2	65433.9	28	39	50	LLRDYQELMNVK	R	L	0.99	30.9	27	14.9	30.9	0	1	0	0	2	1521.81	5052.72	11100000	459	470
Mudpit_Aged_L3_4Left_IAF	Keratin, type II cytoskeletal 2 epidermal OS=Homo sapiens GN=KRT2 PE=1 SV=2	P35908	KRT2	65433.9	28	39	50	MSGDLSSNVTVSVTSSTISSNVASK	R	A	0.997	149	25.6	22.3	149	0	3	0	0	2	2474.19	6108.18	5499220	491	515
Mudpit_Aged_L3_4Left_IAF	Keratin, type II cytoskeletal 2 epidermal OS=Homo sapiens GN=KRT2 PE=1 SV=2	P35908	KRT2	65433.9	28	39	50	NKLNDLEEALQQAKEDLAR	R	L	0.997	82	26.5	18.1	82	0	0	1	1	2	2198.14	7516.28	19000000	440	458
Mudpit_Aged_L3_4Left_IAF	Keratin, type II cytoskeletal 2 epidermal OS=Homo sapiens GN=KRT2 PE=1 SV=2	P35908	KRT2	65433.9	28	39	50	NLDLDSIIAEVK	R	A	0.997	65.6	26.2	19	63.7	0	2	1	0	2	1329.73	8626.87	30700000	342	353
Mudpit_Aged_L3_4Left_IAF	Keratin, type II cytoskeletal 2 epidermal OS=Homo sapiens GN=KRT2 PE=1 SV=2	P35908	KRT2	65433.9	28	39	50	NLDLDSIIAEVKAQYEEIAQR	R	S	0.997	59	26.7	16.7	59	0	0	1	0	2	2418.25	9180.57	25000000	342	362
Mudpit_Aged_L3_4Left_IAF	Keratin, type II cytoskeletal 2 epidermal OS=Homo sapiens GN=KRT2 PE=1 SV=2	P35908	KRT2	65433.9	28	39	50	SISISVAGGGGGFGAAGGFGGR	K	G	0.997	121	27.9	20.6	121	0	4	1	0	2	1838.91	6588.52	39800000	71	92
Mudpit_Aged_L3_4Left_IAF	Keratin, type II cytoskeletal 2 epidermal OS=Homo sapiens GN=KRT2 PE=1 SV=2	P35908	KRT2	65433.9	28	39	50	SKEEAEALYHSKYEELQVTVGR	R	H	0.997	72.4	26.2	17.5	72.4	0	0	1	1	2	2566.28	4309.46	56300000	363	384
Mudpit_Aged_L3_4Left_IAF	Keratin, type II cytoskeletal 2 epidermal OS=Homo sapiens GN=KRT2 PE=1 SV=2	P35908	KRT2	65433.9	28	39	50	TAAENDFVTLK	R	K	0.997	40.5	27.5	15.5	40.5	0	1	0	0	2	1208.62	3838.77	10400000	276	286
Mudpit_Aged_L3_4Left_IAF	Keratin, type II cytoskeletal 2 epidermal OS=Homo sapiens GN=KRT2 PE=1 SV=2	P35908	KRT2	65433.9	28	39	50	TAAENDFVTLKK	R	D	0.997	84.3	26.3	18.3	84.3	0	1	1	0	2	1336.71	2065.99	20800000	276	287
Mudpit_Aged_L3_4Left_IAF	Keratin, type II cytoskeletal 2 epidermal OS=Homo sapiens GN=KRT2 PE=1 SV=2	P35908	KRT2	65433.9	28	39	50	TSQNSELNNMQDLVEDYKK	R	K	0.997	87.3	25	18.5	87.3	0	0	1	0	2	2272.04	3043.63	4435440	248	266
Mudpit_Aged_L3_4Left_IAF	Keratin, type II cytoskeletal 2 epidermal OS=Homo sapiens GN=KRT2 PE=1 SV=2	P35908	KRT2	65433.9	28	39	50	VDLLNQEIEFLK	K	V	0.997	88.9	26.9	18.6	88.9	0	1	0	0	2	1460.8	8353.03	4532760	303	314
Mudpit_Aged_L3_4Left_IAF	Keratin, type II cytoskeletal 2 epidermal OS=Homo sapiens GN=KRT2 PE=1 SV=2	P35908	KRT2	65433.9	28	39	50	VDPEIQNVK	K	A	0.997	48	25	24.2	39.8	0	1	0	0	2	1041.56	1702.32	40500000	167	175
Mudpit_Aged_L3_4Left_IAF	Keratin, type II cytoskeletal 2 epidermal OS=Homo sapiens GN=KRT2 PE=1 SV=2	P35908	KRT2	65433.9	28	39	50	VLYDAEISQIHQSVTDTNVILSMDNSR	K	N	0.997	93.9	30.5	18.9	93.9	0	0	2	1	2	3048.49	7377.48	78800000	315	341
Mudpit_Aged_L3_4Left_IAF	Keratin, type II cytoskeletal 2 epidermal OS=Homo sapiens GN=KRT2 PE=1 SV=2	P35908	KRT2	65433.9	28	39	50	YEELQVTVGR	K	H	0.997	63.3	27.3	17	63.3	0	1	0	0	2	1193.62	3871.74	12900000	375	384
Mudpit_Aged_L3_4Left_IAF	Keratin, type II cytoskeletal 2 epidermal OS=Homo sapiens GN=KRT2 PE=1 SV=2	P35908	KRT2	65433.9	28	39	50	YLDGLTAER	R	T	0.997	50.9	26.1	18	49.1	0	1	0	0	2	1037.53	3480.21	22800000	239	247
Mudpit_Aged_L3_4Left_IAF	Immunoglobulin delta heavy chain OS=Homo sapiens PE=1 SV=1	IGD_HUMAN		0	5	8	12	DAHLTWEVAGK	?	?	0.997	37.4	26.2	15.3	37.4	0	1	2	0	2	1226.62	3548.96	34400000	0	0
Mudpit_Aged_L3_4Left_IAF	Immunoglobulin delta heavy chain OS=Homo sapiens PE=1 SV=1	IGD_HUMAN		0	5	8	12	DSYYMTSSQLSTPLQQWR	?	?	0.997	115	32.5	20.2	115	0	2	0	0	2	2191.01	7377.82	8112040	0	0
Mudpit_Aged_L3_4Left_IAF	Immunoglobulin delta heavy chain OS=Homo sapiens PE=1 SV=1	IGD_HUMAN		0	5	8	12	SLEVSYVTDHGPM	?	?	0.997	78.5	25	17.9	78.5	0	4	0	0	2	1450.65	5006.59	33200000	0	0
Mudpit_Aged_L3_4Left_IAF	Immunoglobulin delta heavy chain OS=Homo sapiens PE=1 SV=1	IGD_HUMAN		0	5	8	12	VPTGGVEEGLLER	?	?	0.997	73.9	26.4	17.6	73.9	0	1	0	0	2	1355.72	4670.49	8297220	0	0
Mudpit_Aged_L3_4Left_IAF	Immunoglobulin delta heavy chain OS=Homo sapiens PE=1 SV=1	IGD_HUMAN		0	5	8	12	VTISVDTSR	?	?	0.996	40	28.4	28.5	26.9	0	2	0	0	2	977.526	2123.95	10700000	0	0
Mudpit_Aged_L3_4Left_IAF	IGK@ protein OS=Homo sapiens GN=IGK@ PE=1 SV=1	Q6P5S8	IGK	25773.1	10	16	160	DSTYSLSSTLTLSK	K	A	0.997	99.2	26.1	19.2	99.2	0	28	4	0	2	1502.76	6207.32	492000000	192	205
Mudpit_Aged_L3_4Left_IAF	IGK@ protein OS=Homo sapiens GN=IGK@ PE=1 SV=1	Q6P5S8	IGK	25773.1	10	16	160	FSGSGSGTDFTLTITR	R	L	0.997	129	33.8	21	129	0	1	0	0	2	1646.8	5948.59	29800000	83	98
Mudpit_Aged_L3_4Left_IAF	IGK@ protein OS=Homo sapiens GN=IGK@ PE=1 SV=1	Q6P5S8	IGK	25773.1	10	16	160	LLIYGASSR	R	A	0.997	37.2	26.2	33	19.6	0	4	0	0	2	979.557	3260.08	23700000	67	75
Mudpit_Aged_L3_4Left_IAF	IGK@ protein OS=Homo sapiens GN=IGK@ PE=1 SV=1	Q6P5S8	IGK	25773.1	10	16	160	RTVAAPSVFIFPPSDEQLK	K	S	0.997	62.1	25.7	16.9	62.1	0	2	0	0	2	2102.13	6647.84	6595490	130	148
Mudpit_Aged_L3_4Left_IAF	IGK@ protein OS=Homo sapiens GN=IGK@ PE=1 SV=1	Q6P5S8	IGK	25773.1	10	16	160	SGTASVVCLLNNFYPR	K	E	0.997	121	27.3	20.6	121	0	19	1	0	2	1798.88	8340.5	149000000	149	164
Mudpit_Aged_L3_4Left_IAF	IGK@ protein OS=Homo sapiens GN=IGK@ PE=1 SV=1	Q6P5S8	IGK	25773.1	10	16	160	TVAAPSVFIFPPSDEQLK	R	S	0.997	77.7	27	17.9	77.7	0	35	14	0	2	1946.03	8110.89	9780000000	131	148
Mudpit_Aged_L3_4Left_IAF	IGK@ protein OS=Homo sapiens GN=IGK@ PE=1 SV=1	Q6P5S8	IGK	25773.1	10	16	160	VDNALQSGNSQESVTEQDSK	K	D	0.997	133	25	21.3	133	0	18	18	0	2	2135.97	1938.97	558000000	172	191
Mudpit_Aged_L3_4Left_IAF	IGK@ protein OS=Homo sapiens GN=IGK@ PE=1 SV=1	Q6P5S8	IGK	25773.1	10	16	160	VDNALQSGNSQESVTEQDSKDSTYSLSSTLTLSK	K	A	0.997	70.1	25	17.4	70.1	0	0	5	2	2	3619.71	6002.79	23300000	172	205
Mudpit_Aged_L3_4Left_IAF	IGK@ protein OS=Homo sapiens GN=IGK@ PE=1 SV=1	Q6P5S8	IGK	25773.1	10	16	160	VQWKVDNALQSGNSQESVTEQDSK	K	D	0.997	85.2	25	18.3	85.2	0	0	1	0	2	2677.27	4235.59	8174590	168	191
Mudpit_Aged_L3_4Left_IAF	IGK@ protein OS=Homo sapiens GN=IGK@ PE=1 SV=1	Q6P5S8	IGK	25773.1	10	16	160	VYACEVTHQGLSSPVTK	K	S	0.997	129	26.1	21.1	129	0	5	3	0	2	1876.91	3835	40800000	213	229
Mudpit_Aged_L3_4Left_IAF	Carboxypeptidase N subunit 2 OS=Homo sapiens GN=CPN2 PE=1 SV=3	P22792	CPN2	60558.7	4	4	6	AGGSWDLAVQER	K	A	0.997	38	25	15.4	38	0	2	0	0	2	1288.63	4389.63	47300000	464	475
Mudpit_Aged_L3_4Left_IAF	Carboxypeptidase N subunit 2 OS=Homo sapiens GN=CPN2 PE=1 SV=3	P22792	CPN2	60558.7	4	4	6	GQVVPALNEK	K	Q	0.961	26	25	14.6	26	0	1	0	0	2	1054.59	2248.53	5435780	432	441
Mudpit_Aged_L3_4Left_IAF	Carboxypeptidase N subunit 2 OS=Homo sapiens GN=CPN2 PE=1 SV=3	P22792	CPN2	60558.7	4	4	6	LELLSLSK	K	N	0.99	50.6	25	32.8	34	0	1	0	0	2	902.556	5506.5	4955690	363	370
Mudpit_Aged_L3_4Left_IAF	Carboxypeptidase N subunit 2 OS=Homo sapiens GN=CPN2 PE=1 SV=3	P22792	CPN2	60558.7	4	4	6	NIIFVETSFTTLETR	K	A	0.997	84	27.1	18.3	84	0	2	0	0	2	1770.93	8230.51	6808110	53	67
Mudpit_Aged_L3_4Left_IAF	Target of Nesh-SH3 OS=Homo sapiens GN=ABI3BP PE=1 SV=1	D3YTG3	ABI3BP	195326	21	29	163	DAIWTERPFNSDSYSECK	R	G	0.989	36	25	15.3	36	0	1	0	0	2	2205.94	6132.9	12300000	1648	1665
Mudpit_Aged_L3_4Left_IAF	Target of Nesh-SH3 OS=Homo sapiens GN=ABI3BP PE=1 SV=1	D3YTG3	ABI3BP	195326	21	29	163	DNVEGGIWSK	K	I	0.997	55.1	26.2	16.4	55.1	0	9	0	0	2	1104.53	4263.87	140000000	203	212
Mudpit_Aged_L3_4Left_IAF	Target of Nesh-SH3 OS=Homo sapiens GN=ABI3BP PE=1 SV=1	D3YTG3	ABI3BP	195326	21	29	163	DVLLPHKPYPEVSQSEPAPLETR	K	G	0.997	73.3	26.3	17.6	73.3	0	1	4	1	2	2602.35	5174.87	66600000	1263	1285
Mudpit_Aged_L3_4Left_IAF	Target of Nesh-SH3 OS=Homo sapiens GN=ABI3BP PE=1 SV=1	D3YTG3	ABI3BP	195326	21	29	163	FTEAIVDAEPK	K	Y	0.997	77.7	27	17.9	77.7	0	20	0	0	2	1219.62	3860.98	276000000	88	98
Mudpit_Aged_L3_4Left_IAF	Target of Nesh-SH3 OS=Homo sapiens GN=ABI3BP PE=1 SV=1	D3YTG3	ABI3BP	195326	21	29	163	FVGVQLCNSLR	K	Y	0.997	52.8	26.7	16.6	52.6	0	6	0	0	2	1293.66	5751.99	83600000	1678	1688
Mudpit_Aged_L3_4Left_IAF	Target of Nesh-SH3 OS=Homo sapiens GN=ABI3BP PE=1 SV=1	D3YTG3	ABI3BP	195326	21	29	163	FYNIGDQR	K	G	0.99	40.8	25.7	15.6	40.8	0	7	0	0	2	1012.48	2763.81	303000000	1701	1708
Mudpit_Aged_L3_4Left_IAF	Target of Nesh-SH3 OS=Homo sapiens GN=ABI3BP PE=1 SV=1	D3YTG3	ABI3BP	195326	21	29	163	IETDIKQPTVPASGEELENITDFSSSPTR	R	E	0.997	86.7	25.6	18.4	86.7	0	0	4	0	2	3161.55	6943.18	19900000	1462	1490
Mudpit_Aged_L3_4Left_IAF	Target of Nesh-SH3 OS=Homo sapiens GN=ABI3BP PE=1 SV=1	D3YTG3	ABI3BP	195326	21	29	163	ILDSIPPK	R	T	0.99	42.6	25	15.7	42.6	0	5	0	0	2	882.53	3071.79	26800000	463	470
Mudpit_Aged_L3_4Left_IAF	Target of Nesh-SH3 OS=Homo sapiens GN=ABI3BP PE=1 SV=1	D3YTG3	ABI3BP	195326	21	29	163	IQSTYDQDHTVPAYVPR	K	K	0.997	154	25.7	22.6	154	0	10	11	0	2	1989.97	4024.96	712000000	229	245
Mudpit_Aged_L3_4Left_IAF	Target of Nesh-SH3 OS=Homo sapiens GN=ABI3BP PE=1 SV=1	D3YTG3	ABI3BP	195326	21	29	163	IYLSDSLTGK	K	F	0.997	52.1	25.6	16.3	52.1	0	11	0	0	2	1096.59	4415.75	235000000	1691	1700
Mudpit_Aged_L3_4Left_IAF	Target of Nesh-SH3 OS=Homo sapiens GN=ABI3BP PE=1 SV=1	D3YTG3	ABI3BP	195326	21	29	163	LEGLLLGYGSNVSPNQYFPLPAEGK	K	F	0.997	94.2	26	18.9	94.2	0	2	2	0	2	2663.37	8990.77	599000000	63	87
Mudpit_Aged_L3_4Left_IAF	Target of Nesh-SH3 OS=Homo sapiens GN=ABI3BP PE=1 SV=1	D3YTG3	ABI3BP	195326	21	29	163	LIPITIIK	K	Q	0.989	31.6	25	15	31.6	0	3	0	0	2	910.634	6013.99	48400000	247	254
Mudpit_Aged_L3_4Left_IAF	Target of Nesh-SH3 OS=Homo sapiens GN=ABI3BP PE=1 SV=1	D3YTG3	ABI3BP	195326	21	29	163	LPASLMFEISDALK	K	T	0.997	113	26.7	20.1	113	0	15	2	0	2	1534.82	8430.1	264000000	294	307
Mudpit_Aged_L3_4Left_IAF	Target of Nesh-SH3 OS=Homo sapiens GN=ABI3BP PE=1 SV=1	D3YTG3	ABI3BP	195326	21	29	163	LVPATILEPVLR	K	T	0.997	39.9	25	15.5	39.9	0	2	0	0	2	1320.83	7515.64	30100000	807	818
Mudpit_Aged_L3_4Left_IAF	Target of Nesh-SH3 OS=Homo sapiens GN=ABI3BP PE=1 SV=1	D3YTG3	ABI3BP	195326	21	29	163	LVPSTDLEPGTLR	K	T	0.997	47	25.3	15.9	47	0	1	0	0	2	1397.76	4937.39	7764070	1017	1029
Mudpit_Aged_L3_4Left_IAF	Target of Nesh-SH3 OS=Homo sapiens GN=ABI3BP PE=1 SV=1	D3YTG3	ABI3BP	195326	21	29	163	NPLGEGPVSNTVAFSTESADPR	K	V	0.997	182	25.4	24.3	182	0	12	9	0	2	2245.07	5958.55	2890000000	1617	1638
Mudpit_Aged_L3_4Left_IAF	Target of Nesh-SH3 OS=Homo sapiens GN=ABI3BP PE=1 SV=1	D3YTG3	ABI3BP	195326	21	29	163	QPTVPASGEELENITDFSSSPTR	K	E	0.976	44.7	34.8	15.8	44.7	0	0	1	0	2	2462.17	6916.88	2851200	1468	1490
Mudpit_Aged_L3_4Left_IAF	Target of Nesh-SH3 OS=Homo sapiens GN=ABI3BP PE=1 SV=1	D3YTG3	ABI3BP	195326	21	29	163	TGQQLTSDQLPIK	R	E	0.997	91.2	28	18.7	91.2	0	10	0	0	2	1428.77	4072.69	122000000	1726	1738
Mudpit_Aged_L3_4Left_IAF	Target of Nesh-SH3 OS=Homo sapiens GN=ABI3BP PE=1 SV=1	D3YTG3	ABI3BP	195326	21	29	163	TGQQLTSDQLPIKEGYFR	R	A	0.997	77.4	26.3	17.8	77.4	0	0	1	0	2	2081.07	5397.21	5996540	1726	1743
Mudpit_Aged_L3_4Left_IAF	Target of Nesh-SH3 OS=Homo sapiens GN=ABI3BP PE=1 SV=1	D3YTG3	ABI3BP	195326	21	29	163	VHINTTSDSILLK	K	F	0.992	47.7	25	16	47.7	0	0	1	0	2	1440.81	3688.68	7254260	41	53
Mudpit_Aged_L3_4Left_IAF	Target of Nesh-SH3 OS=Homo sapiens GN=ABI3BP PE=1 SV=1	D3YTG3	ABI3BP	195326	21	29	163	YIQKPDNSPCSITDSVK	R	R	0.997	84.1	25	18.3	84.1	0	6	6	0	2	1952.93	3136.65	80800000	1507	1523
Mudpit_Aged_L3_4Left_IAF	Myosin-reactive immunoglobulin heavy chain variable region (Fragment) OS=Homo sapiens PE=2 SV=1	Q9UL89		12605.3	2	3	4	QAPGQGLEWMGR	R	I	0.997	65.1	25	58.7	23.5	0	2	0	0	2	1329.64	4881.13	17500000	35	46
Mudpit_Aged_L3_4Left_IAF	Myosin-reactive immunoglobulin heavy chain variable region (Fragment) OS=Homo sapiens PE=2 SV=1	Q9UL89		12605.3	2	3	4	STSTAYMELSSLR	K	S	0.997	63.4	25.3	17	63.4	0	2	0	0	2	1445.69	5105.45	7715660	71	83
Mudpit_Aged_L3_4Left_IAF	Myosin-reactive immunoglobulin kappa chain variable region (Fragment) OS=Homo sapiens PE=2 SV=1	Q9UL86		11928.8	2	2	2	FSGSGSETDFTLTISR	R	L	0.997	65.9	25.7	17.1	65.9	0	1	0	0	2	1704.81	5979.72	2914870	63	78
Mudpit_Aged_L3_4Left_IAF	Myosin-reactive immunoglobulin kappa chain variable region (Fragment) OS=Homo sapiens PE=2 SV=1	Q9UL86		11928.8	2	2	2	LLIYGTSSR	R	A	0.997	38.3	25	31.5	22.2	0	1	0	0	2	1009.57	3295	7613600	47	55
Mudpit_Aged_L3_4Left_IAF	Adipocyte enhancer-binding protein 1 OS=Homo sapiens GN=AEBP1 PE=1 SV=1	Q8IUX7	AEBP1	130931	17	26	61	AIIAWMEK	R	N	0.99	49.4	28	16.1	49.4	0	3	0	0	2	961.518	5417.92	15600000	746	753
Mudpit_Aged_L3_4Left_IAF	Adipocyte enhancer-binding protein 1 OS=Homo sapiens GN=AEBP1 PE=1 SV=1	Q8IUX7	AEBP1	130931	17	26	61	DTPVLSELPEPVVAR	K	F	0.997	69.1	25.8	17.3	69.1	0	1	1	0	2	1621.88	7360.39	18700000	504	518
Mudpit_Aged_L3_4Left_IAF	Adipocyte enhancer-binding protein 1 OS=Homo sapiens GN=AEBP1 PE=1 SV=1	Q8IUX7	AEBP1	130931	17	26	61	EALLTFMEQVHR	K	G	0.997	75.8	26.4	17.7	75.8	0	1	2	0	2	1473.75	6420.2	21900000	895	906
Mudpit_Aged_L3_4Left_IAF	Adipocyte enhancer-binding protein 1 OS=Homo sapiens GN=AEBP1 PE=1 SV=1	Q8IUX7	AEBP1	130931	17	26	61	EDYEDFEYIR	R	R	0.997	41	25	15.6	41	0	1	0	0	2	1378.58	7128.36	4430730	242	251
Mudpit_Aged_L3_4Left_IAF	Adipocyte enhancer-binding protein 1 OS=Homo sapiens GN=AEBP1 PE=1 SV=1	Q8IUX7	AEBP1	130931	17	26	61	FTGVITQGR	R	D	0.997	48.8	26.7	19.8	45.1	0	2	0	0	2	978.537	2050.9	12900000	454	462
Mudpit_Aged_L3_4Left_IAF	Adipocyte enhancer-binding protein 1 OS=Homo sapiens GN=AEBP1 PE=1 SV=1	Q8IUX7	AEBP1	130931	17	26	61	GEDEDEVSEAQETPDHAIFR	R	W	0.997	86.9	25	18.4	86.9	0	0	12	0	2	2273.98	4456.52	65100000	794	813
Mudpit_Aged_L3_4Left_IAF	Adipocyte enhancer-binding protein 1 OS=Homo sapiens GN=AEBP1 PE=1 SV=1	Q8IUX7	AEBP1	130931	17	26	61	GEELEEEWTPTEK	K	V	0.997	66.9	25	17.2	66.9	0	1	0	0	2	1576.7	4671.47	3261620	370	382
Mudpit_Aged_L3_4Left_IAF	Adipocyte enhancer-binding protein 1 OS=Homo sapiens GN=AEBP1 PE=1 SV=1	Q8IUX7	AEBP1	130931	17	26	61	ILNPGEYR	R	V	0.99	43.1	27.8	16.7	42.2	0	2	0	0	2	961.51	2258.81	12800000	945	952
Mudpit_Aged_L3_4Left_IAF	Adipocyte enhancer-binding protein 1 OS=Homo sapiens GN=AEBP1 PE=1 SV=1	Q8IUX7	AEBP1	130931	17	26	61	IYAMEISDNPGEHELGEPEFR	K	Y	0.997	74.9	25	17.7	74.9	0	0	4	0	2	2433.1	5801.2	81200000	599	619
Mudpit_Aged_L3_4Left_IAF	Adipocyte enhancer-binding protein 1 OS=Homo sapiens GN=AEBP1 PE=1 SV=1	Q8IUX7	AEBP1	130931	17	26	61	KGEELEEEWTPTEK	R	V	0.997	78.7	25.5	17.9	78.7	0	3	2	0	2	1704.8	3349.24	36100000	369	382
Mudpit_Aged_L3_4Left_IAF	Adipocyte enhancer-binding protein 1 OS=Homo sapiens GN=AEBP1 PE=1 SV=1	Q8IUX7	AEBP1	130931	17	26	61	LNMQTGATEDDYYDGAWCAEDDAR	R	T	0.997	106	25	19.6	106	0	2	0	0	2	2768.07	6441.89	5027780	417	440
Mudpit_Aged_L3_4Left_IAF	Adipocyte enhancer-binding protein 1 OS=Homo sapiens GN=AEBP1 PE=1 SV=1	Q8IUX7	AEBP1	130931	17	26	61	LVSYPYDMAR	R	T	0.997	44	25	15.7	44	0	3	0	0	2	1214.59	4466.77	35100000	768	777
Mudpit_Aged_L3_4Left_IAF	Adipocyte enhancer-binding protein 1 OS=Homo sapiens GN=AEBP1 PE=1 SV=1	Q8IUX7	AEBP1	130931	17	26	61	TPTQEQLLAAAMAAAR	R	G	0.997	81.7	26.7	18.2	81.6	0	4	5	0	2	1642.86	7596.52	74300000	778	793
Mudpit_Aged_L3_4Left_IAF	Adipocyte enhancer-binding protein 1 OS=Homo sapiens GN=AEBP1 PE=1 SV=1	Q8IUX7	AEBP1	130931	17	26	61	TQWIEVDTR	R	R	0.996	34.4	26.8	15.2	34.4	0	1	0	0	2	1147.57	4350.19	7677570	441	449
Mudpit_Aged_L3_4Left_IAF	Adipocyte enhancer-binding protein 1 OS=Homo sapiens GN=AEBP1 PE=1 SV=1	Q8IUX7	AEBP1	130931	17	26	61	VPNNNLPIPER	R	Y	0.997	75.4	27.1	17.7	75.4	0	2	0	0	2	1262.69	3553.53	19600000	722	732
Mudpit_Aged_L3_4Left_IAF	Adipocyte enhancer-binding protein 1 OS=Homo sapiens GN=AEBP1 PE=1 SV=1	Q8IUX7	AEBP1	130931	17	26	61	YLSPDATVSTEVR	R	A	0.997	82.6	30.1	18.2	82.6	0	5	0	0	2	1437.72	4038.08	42800000	733	745
Mudpit_Aged_L3_4Left_IAF	Adipocyte enhancer-binding protein 1 OS=Homo sapiens GN=AEBP1 PE=1 SV=1	Q8IUX7	AEBP1	130931	17	26	61	YTAGIHGNEVLGR	R	E	0.997	74.9	26.9	18	74.5	0	2	2	0	2	1386.71	2010.38	31100000	620	632
Mudpit_Aged_L3_4Left_IAF	Cytoskeleton-associated protein 4, isoform CRA_c OS=Homo sapiens GN=CKAP4 PE=4 SV=1	A0A024RBH2,Q07065,Q6NWZ1,Q8TB01	CKAP4	66022.2	2	2	2	SLGETQLVLYGDVEELKR	R	S	0.963	32.1	25.9	15	32.1	0	0	1	0	2	2049.09	6671.3	5491150	474	491
Mudpit_Aged_L3_4Left_IAF	Cytoskeleton-associated protein 4, isoform CRA_c OS=Homo sapiens GN=CKAP4 PE=4 SV=1	A0A024RBH2,Q07065,Q6NWZ1,Q8TB01	CKAP4	66022.2	2	2	2	VQEQVHTLLSQDQAQAAR	K	L	0.993	50.8	31.4	16.2	50.8	0	0	1	0	2	2022.04	2813.22	6856050	506	523
Mudpit_Aged_L3_4Left_IAF	Prolargin OS=Homo sapiens GN=PRELP PE=1 SV=1	P51888	PRELP	43812.4	14	27	203	IETIPNGYFK	K	S	0.997	58.4	26.8	16.6	58.4	0	3	0	0	2	1181.62	4980.69	26400000	254	263
Mudpit_Aged_L3_4Left_IAF	Prolargin OS=Homo sapiens GN=PRELP PE=1 SV=1	P51888	PRELP	43812.4	14	27	203	IHYLYLQNNFITELPVESFQNATGLR	R	W	0.997	105	25.2	19.6	105	0	0	1	0	2	3080.58	8974.21	57200000	104	129
Mudpit_Aged_L3_4Left_IAF	Prolargin OS=Homo sapiens GN=PRELP PE=1 SV=1	P51888	PRELP	43812.4	14	27	203	INGTQICPNDLVAFHDFSSDLENVPHLR	K	Y	0.993	58.8	25.1	16.7	58.8	0	0	1	9	2	3209.53	8623.32	62000000	326	353
Mudpit_Aged_L3_4Left_IAF	Prolargin OS=Homo sapiens GN=PRELP PE=1 SV=1	P51888	PRELP	43812.4	14	27	203	IPPGVFSK	R	L	0.99	46.4	28.9	23.3	39	0	15	0	0	2	844.493	2656.06	1520000000	186	193
Mudpit_Aged_L3_4Left_IAF	Prolargin OS=Homo sapiens GN=PRELP PE=1 SV=1	P51888	PRELP	43812.4	14	27	203	ISSVPAINNR	R	L	0.997	51.5	25	16.2	51.5	0	9	0	0	2	1070.6	2012.19	1590000000	303	312
Mudpit_Aged_L3_4Left_IAF	Prolargin OS=Homo sapiens GN=PRELP PE=1 SV=1	P51888	PRELP	43812.4	14	27	203	LEHLYLNNNSIEK	R	I	0.997	71.8	27.1	17.9	71.4	0	6	8	0	2	1586.82	3051.09	1590000000	313	325
Mudpit_Aged_L3_4Left_IAF	Prolargin OS=Homo sapiens GN=PRELP PE=1 SV=1	P51888	PRELP	43812.4	14	27	203	LENLLLLDLQHNR	K	L	0.997	71	25	17.4	71	0	7	9	0	2	1590.9	6602.48	660000000	194	206
Mudpit_Aged_L3_4Left_IAF	Prolargin OS=Homo sapiens GN=PRELP PE=1 SV=1	P51888	PRELP	43812.4	14	27	203	LPGLVFLYMEK	K	N	0.997	67	26.3	17.2	67	0	28	2	0	2	1309.72	8484.08	333000000	149	159
Mudpit_Aged_L3_4Left_IAF	Prolargin OS=Homo sapiens GN=PRELP PE=1 SV=1	P51888	PRELP	43812.4	14	27	203	LSDGVFKPDTFHGLK	R	N	0.997	100	26.6	19.3	100	0	12	7	18	2	1660.87	4456.85	1270000000	207	221
Mudpit_Aged_L3_4Left_IAF	Prolargin OS=Homo sapiens GN=PRELP PE=1 SV=1	P51888	PRELP	43812.4	14	27	203	NLMQLNLAHNILR	K	K	0.997	82.4	25	18.1	82.4	0	4	19	0	2	1549.86	5819.85	997000000	222	234
Mudpit_Aged_L3_4Left_IAF	Prolargin OS=Homo sapiens GN=PRELP PE=1 SV=1	P51888	PRELP	43812.4	14	27	203	NQLEEVPSALPR	K	N	0.997	56.9	25.8	19.3	54.1	0	7	3	0	2	1352.72	4741.82	670000000	160	171
Mudpit_Aged_L3_4Left_IAF	Prolargin OS=Homo sapiens GN=PRELP PE=1 SV=1	P51888	PRELP	43812.4	14	27	203	SFPNLAFIR	K	L	0.997	36.4	26.5	15.3	36.4	0	7	0	0	2	1064.59	6986.19	1370000000	264	272
Mudpit_Aged_L3_4Left_IAF	Prolargin OS=Homo sapiens GN=PRELP PE=1 SV=1	P51888	PRELP	43812.4	14	27	203	VPTAIHQLYLDSNK	R	I	0.997	102	26.8	19.4	102	0	7	14	0	2	1598.85	4016.65	1820000000	240	253
Mudpit_Aged_L3_4Left_IAF	Prolargin OS=Homo sapiens GN=PRELP PE=1 SV=1	P51888	PRELP	43812.4	14	27	203	WINLDNNR	R	I	0.99	36.8	25	15.3	36.8	0	7	0	0	2	1044.52	3547.42	169000000	130	137
Mudpit_Aged_L3_4Left_IAF	Lumican OS=Homo sapiens GN=LUM PE=1 SV=2	P51884	LUM	38431.5	13	19	158	AFENVTDLQWLILDHNLLENSK	K	I	0.971	33.5	26.1	15.1	33.5	0	0	1	0	2	2612.34	9012.05	4300060	85	106
Mudpit_Aged_L3_4Left_IAF	Lumican OS=Homo sapiens GN=LUM PE=1 SV=2	P51884	LUM	38431.5	13	19	158	EDAVSAAFK	K	G	0.997	73.7	26.5	17.6	73.7	0	8	0	0	2	937.462	2548.53	577000000	173	181
Mudpit_Aged_L3_4Left_IAF	Lumican OS=Homo sapiens GN=LUM PE=1 SV=2	P51884	LUM	38431.5	13	19	158	FNALQYLR	R	L	0.99	45	25	15.8	45	0	9	0	0	2	1024.56	5982.33	122000000	228	235
Mudpit_Aged_L3_4Left_IAF	Lumican OS=Homo sapiens GN=LUM PE=1 SV=2	P51884	LUM	38431.5	13	19	158	ILGPLSYSK	K	I	0.997	62.6	25.5	40.5	39	0	5	0	0	2	977.567	4074.85	389000000	297	305
Mudpit_Aged_L3_4Left_IAF	Lumican OS=Homo sapiens GN=LUM PE=1 SV=2	P51884	LUM	38431.5	13	19	158	ISETSLPPDMYECLR	R	V	0.997	67.6	25	17.2	67.6	0	6	0	0	2	1811.82	6793.27	23400000	316	330
Mudpit_Aged_L3_4Left_IAF	Lumican OS=Homo sapiens GN=LUM PE=1 SV=2	P51884	LUM	38431.5	13	19	158	ISNIPDEYFK	K	R	0.997	53.2	25	19.6	49.8	0	10	0	0	2	1225.61	5130.69	331000000	217	226
Mudpit_Aged_L3_4Left_IAF	Lumican OS=Homo sapiens GN=LUM PE=1 SV=2	P51884	LUM	38431.5	13	19	158	LKEDAVSAAFK	R	G	0.997	82.1	27.1	22.1	78.1	0	7	11	0	2	1178.64	2121.84	165000000	171	181
Mudpit_Aged_L3_4Left_IAF	Lumican OS=Homo sapiens GN=LUM PE=1 SV=2	P51884	LUM	38431.5	13	19	158	LPSGLPVSLLTLYLDNNK	R	I	0.997	121	25	20.6	121	0	5	2	0	2	1957.1	9122.4	261000000	199	216
Mudpit_Aged_L3_4Left_IAF	Lumican OS=Homo sapiens GN=LUM PE=1 SV=2	P51884	LUM	38431.5	13	19	158	NIPTVNENLENYYLEVNQLEK	K	F	0.997	98.5	26.2	19.2	98.5	0	16	13	0	2	2536.26	8459.98	2550000000	268	288
Mudpit_Aged_L3_4Left_IAF	Lumican OS=Homo sapiens GN=LUM PE=1 SV=2	P51884	LUM	38431.5	13	19	158	SLEDLQLTHNK	K	I	0.997	69.9	25.5	17.4	69.9	0	6	6	0	2	1297.67	2604.22	510000000	138	148
Mudpit_Aged_L3_4Left_IAF	Lumican OS=Homo sapiens GN=LUM PE=1 SV=2	P51884	LUM	38431.5	13	19	158	SLEYLDLSFNQIAR	K	L	0.997	85.9	25.9	18.4	85.9	0	18	7	0	2	1668.86	8336.18	248000000	185	198
Mudpit_Aged_L3_4Left_IAF	Lumican OS=Homo sapiens GN=LUM PE=1 SV=2	P51884	LUM	38431.5	13	19	158	SVPMVPPGIK	K	Y	0.997	42.7	26.6	15.7	42.7	0	27	0	0	2	1040.58	3437.52	902000000	60	69
Mudpit_Aged_L3_4Left_IAF	Lumican OS=Homo sapiens GN=LUM PE=1 SV=2	P51884	LUM	38431.5	13	19	158	VANEVTLN	R	-	0.988	28	25.5	15.3	27.4	0	1	0	0	2	859.452	2618.33	66300000	331	338
Mudpit_Aged_L3_4Left_IAF	A0A1L7B5J3_HUMAN	A0A1L7B5J3_HUMAN		0	2	4	24	FLEAIPMSIPPEVK	?	?	0.997	55.8	26.5	16.5	55.8	0	19	3	0	2	1570.86	7912.18	150000000	0	0
Mudpit_Aged_L3_4Left_IAF	A0A1L7B5J3_HUMAN	A0A1L7B5J3_HUMAN		0	2	4	24	MFLEAIPMSIPPEVK	?	?	0.997	43.7	26.8	15.7	43.7	0	2	0	0	2	1701.9	8913.1	13500000	0	0
Mudpit_Aged_L3_4Left_IAF	Angiopoietin-like 2, isoform CRA_a OS=Homo sapiens GN=ANGPTL2 PE=4 SV=1	A0A024R868,Q9UKU9	ANGPTL2	57104.9	11	13	29	DNALELSQLENR	R	I	0.997	55.5	34.9	16.5	55.5	0	1	0	0	2	1401.7	5454.2	6271820	150	161
Mudpit_Aged_L3_4Left_IAF	Angiopoietin-like 2, isoform CRA_a OS=Homo sapiens GN=ANGPTL2 PE=4 SV=1	A0A024R868,Q9UKU9	ANGPTL2	57104.9	11	13	29	EPEVLLENR	K	V	0.993	30.9	26.2	14.9	30.9	0	1	0	0	2	1098.58	3291.13	4474330	75	83
Mudpit_Aged_L3_4Left_IAF	Angiopoietin-like 2, isoform CRA_a OS=Homo sapiens GN=ANGPTL2 PE=4 SV=1	A0A024R868,Q9UKU9	ANGPTL2	57104.9	11	13	29	IINQISTNEIQSDQNLK	R	V	0.997	86.9	26.3	18.4	86.9	0	1	0	0	2	1958.02	4566.77	5065160	233	249
Mudpit_Aged_L3_4Left_IAF	Angiopoietin-like 2, isoform CRA_a OS=Homo sapiens GN=ANGPTL2 PE=4 SV=1	A0A024R868,Q9UKU9	ANGPTL2	57104.9	11	13	29	LDGSVNFFR	R	N	0.997	92.5	27	18.8	92.5	0	4	0	0	2	1054.53	5732.01	40300000	323	331
Mudpit_Aged_L3_4Left_IAF	Angiopoietin-like 2, isoform CRA_a OS=Homo sapiens GN=ANGPTL2 PE=4 SV=1	A0A024R868,Q9UKU9	ANGPTL2	57104.9	11	13	29	LEPESEYYK	R	L	0.997	51.8	25	16.2	51.8	0	2	0	0	2	1157.54	2128.77	31800000	386	394
Mudpit_Aged_L3_4Left_IAF	Angiopoietin-like 2, isoform CRA_a OS=Homo sapiens GN=ANGPTL2 PE=4 SV=1	A0A024R868,Q9UKU9	ANGPTL2	57104.9	11	13	29	LLVTMEDWSGR	K	K	0.997	76.3	26.1	17.8	76.3	0	9	0	0	2	1322.64	6461.46	67400000	365	375
Mudpit_Aged_L3_4Left_IAF	Angiopoietin-like 2, isoform CRA_a OS=Homo sapiens GN=ANGPTL2 PE=4 SV=1	A0A024R868,Q9UKU9	ANGPTL2	57104.9	11	13	29	QELELLNNELLK	K	Q	0.997	71.7	25.2	20.1	69.1	0	1	0	0	2	1455.81	7115.1	11700000	87	98
Mudpit_Aged_L3_4Left_IAF	Angiopoietin-like 2, isoform CRA_a OS=Homo sapiens GN=ANGPTL2 PE=4 SV=1	A0A024R868,Q9UKU9	ANGPTL2	57104.9	11	13	29	QIETLQQLVEVDGGIVSEVK	R	L	0.997	112	25.7	20	112	0	3	2	0	2	2184.18	8584.01	25800000	102	121
Mudpit_Aged_L3_4Left_IAF	Angiopoietin-like 2, isoform CRA_a OS=Homo sapiens GN=ANGPTL2 PE=4 SV=1	A0A024R868,Q9UKU9	ANGPTL2	57104.9	11	13	29	RDNALELSQLENR	K	I	0.985	39.6	27.6	15.5	39.6	0	0	2	0	2	1557.8	3959.12	18400000	149	161
Mudpit_Aged_L3_4Left_IAF	Angiopoietin-like 2, isoform CRA_a OS=Homo sapiens GN=ANGPTL2 PE=4 SV=1	A0A024R868,Q9UKU9	ANGPTL2	57104.9	11	13	29	VFAEYASFR	K	L	0.997	36	25.8	15.3	36	0	1	0	0	2	1089.54	4755.38	100000000	377	385
Mudpit_Aged_L3_4Left_IAF	Angiopoietin-like 2, isoform CRA_a OS=Homo sapiens GN=ANGPTL2 PE=4 SV=1	A0A024R868,Q9UKU9	ANGPTL2	57104.9	11	13	29	YQDGVYWAEFR	R	G	0.997	74.3	28.4	17.6	74.3	0	2	0	0	2	1433.65	6458.35	15500000	462	472
Mudpit_Aged_L3_4Left_IAF	Complement factor H OS=Homo sapiens GN=CFH PE=1 SV=4	P08603	CFH	139096	21	30	69	AQTTVTCMENGWSPTPR	K	C	0.997	67.8	25	17.2	67.8	0	9	1	0	2	1936.85	4937.15	40400000	425	441
Mudpit_Aged_L3_4Left_IAF	Complement factor H OS=Homo sapiens GN=CFH PE=1 SV=4	P08603	CFH	139096	21	30	69	CFEGFGIDGPAIAK	K	C	0.997	54.3	25	16.4	54.3	0	2	0	0	2	1482.69	7406.15	8822480	959	972
Mudpit_Aged_L3_4Left_IAF	Complement factor H OS=Homo sapiens GN=CFH PE=1 SV=4	P08603	CFH	139096	21	30	69	CNMGYEYSER	K	G	0.961	23.8	25	14.5	23.8	0	1	0	0	2	1309.48	2521.36	10600000	237	246
Mudpit_Aged_L3_4Left_IAF	Complement factor H OS=Homo sapiens GN=CFH PE=1 SV=4	P08603	CFH	139096	21	30	69	EGWIHTVCINGR	K	W	0.997	45.3	25.7	15.8	45.3	0	2	0	0	2	1442.68	4731.75	15400000	785	796
Mudpit_Aged_L3_4Left_IAF	Complement factor H OS=Homo sapiens GN=CFH PE=1 SV=4	P08603	CFH	139096	21	30	69	EIMENYNIALR	R	W	0.997	68.6	26.7	22.5	63.4	0	8	1	0	2	1381.68	5005.26	112000000	1172	1182
Mudpit_Aged_L3_4Left_IAF	Complement factor H OS=Homo sapiens GN=CFH PE=1 SV=4	P08603	CFH	139096	21	30	69	EQVQSCGPPPELLNGNVK	K	E	0.997	55.1	25.5	16.4	55.1	0	1	0	0	2	1966.95	4772.27	4820700	625	642
Mudpit_Aged_L3_4Left_IAF	Complement factor H OS=Homo sapiens GN=CFH PE=1 SV=4	P08603	CFH	139096	21	30	69	GEWVALNPLR	K	K	0.997	36.4	25.4	15.3	36.4	0	4	0	0	2	1154.63	6279.68	93700000	69	78
Mudpit_Aged_L3_4Left_IAF	Complement factor H OS=Homo sapiens GN=CFH PE=1 SV=4	P08603	CFH	139096	21	30	69	HGGLYHENMR	K	R	0.969	34.5	25	15.2	34.5	0	0	1	0	2	1213.55	1173.91	998689	332	341
Mudpit_Aged_L3_4Left_IAF	Complement factor H OS=Homo sapiens GN=CFH PE=1 SV=4	P08603	CFH	139096	21	30	69	IDVHLVPDR	K	K	0.997	52.6	25.7	16.3	52.6	0	2	4	0	2	1063.59	3328.38	53900000	574	582
Mudpit_Aged_L3_4Left_IAF	Complement factor H OS=Homo sapiens GN=CFH PE=1 SV=4	P08603	CFH	139096	21	30	69	IDVHLVPDRK	K	K	0.976	34	25	15.1	34	0	0	2	0	2	1191.68	1861.86	22200000	574	583
Mudpit_Aged_L3_4Left_IAF	Complement factor H OS=Homo sapiens GN=CFH PE=1 SV=4	P08603	CFH	139096	21	30	69	IVSSAMEPDR	K	E	0.997	50.1	26.4	16.1	50.1	0	2	0	0	2	1104.54	1569.69	60600000	157	166
Mudpit_Aged_L3_4Left_IAF	Complement factor H OS=Homo sapiens GN=CFH PE=1 SV=4	P08603	CFH	139096	21	30	69	IVSSAMEPDREYHFGQAVR	K	F	0.979	38.5	25.4	15.4	38.5	0	0	2	0	2	2208.05	3275.73	22500000	157	175
Mudpit_Aged_L3_4Left_IAF	Complement factor H OS=Homo sapiens GN=CFH PE=1 SV=4	P08603	CFH	139096	21	30	69	KEFDHNSNIR	K	Y	0.982	37.4	25	15.3	37.4	0	0	1	0	2	1259.61	1165.93	579113	769	778
Mudpit_Aged_L3_4Left_IAF	Complement factor H OS=Homo sapiens GN=CFH PE=1 SV=4	P08603	CFH	139096	21	30	69	NTEILTGSWSDQTYPEGTQAIYK	R	C	0.997	113	25	20	113	0	3	3	0	2	2602.23	7008.2	32400000	29	51
Mudpit_Aged_L3_4Left_IAF	Complement factor H OS=Homo sapiens GN=CFH PE=1 SV=4	P08603	CFH	139096	21	30	69	RPCGHPGDTPFGTFTLTGGNVFEYGVK	K	A	0.956	44.4	25.6	15.8	44.4	0	0	0	1	2	2912.37	7205.7	15600000	83	109
Mudpit_Aged_L3_4Left_IAF	Complement factor H OS=Homo sapiens GN=CFH PE=1 SV=4	P08603	CFH	139096	21	30	69	RPYFPVAVGK	R	Y	0.997	44.4	25.5	20.3	39.9	0	2	0	0	2	1133.65	3015.83	33200000	342	351
Mudpit_Aged_L3_4Left_IAF	Complement factor H OS=Homo sapiens GN=CFH PE=1 SV=4	P08603	CFH	139096	21	30	69	SPDVINGSPISQK	K	I	0.997	74.6	26.2	17.7	74.6	0	3	0	0	2	1341.7	3081.82	74300000	212	224
Mudpit_Aged_L3_4Left_IAF	Complement factor H OS=Homo sapiens GN=CFH PE=1 SV=4	P08603	CFH	139096	21	30	69	SPPEISHGVVAHMSDSYQYGEEVTYK	K	C	0.997	73.3	25	17.6	73.3	0	0	3	3	2	2910.33	5124.71	39400000	933	958
Mudpit_Aged_L3_4Left_IAF	Complement factor H OS=Homo sapiens GN=CFH PE=1 SV=4	P08603	CFH	139096	21	30	69	SSIDIENGFISESQYTYALK	K	E	0.997	125	26.2	20.8	125	0	3	0	0	2	2265.09	8029.3	8317100	451	470
Mudpit_Aged_L3_4Left_IAF	Complement factor H OS=Homo sapiens GN=CFH PE=1 SV=4	P08603	CFH	139096	21	30	69	SSNLIILEEHLK	K	N	0.997	44.5	25.1	15.8	44.5	0	2	2	0	2	1395.78	5122.04	56000000	755	766
Mudpit_Aged_L3_4Left_IAF	Complement factor H OS=Homo sapiens GN=CFH PE=1 SV=4	P08603	CFH	139096	21	30	69	TGESVEFVCK	R	R	0.997	40.8	25	15.6	40.8	0	1	0	0	2	1156.52	3291.54	2765380	1193	1202
Mudpit_Aged_L3_4Left_IAF	GCT-A9 light chain variable region (Fragment) OS=Homo sapiens PE=2 SV=1	A0A125QYY5		11610.3	2	5	11	DIQMTQSPSSLSASVGDR	-	V	0.997	130	25.8	21.1	130	0	7	3	0	2	1878.89	4687.94	70800000	1	18
Mudpit_Aged_L3_4Left_IAF	GCT-A9 light chain variable region (Fragment) OS=Homo sapiens PE=2 SV=1	A0A125QYY5		11610.3	2	5	11	LLIYDASNLETGVPSR	K	F	0.997	124	26.6	20.8	124	0	1	0	0	2	1747.92	6752.54	20600000	46	61
Mudpit_Aged_L3_4Left_IAF	GCT-A7 heavy chain variable region (Fragment) OS=Homo sapiens PE=2 SV=1	A0A125QYY4		13157	2	2	2	GLEWMGIIYPDDSDTR	K	Y	0.997	85.4	25.3	18.3	85.4	0	1	0	0	2	1867.85	8935.35	16000000	44	59
Mudpit_Aged_L3_4Left_IAF	GCT-A7 heavy chain variable region (Fragment) OS=Homo sapiens PE=2 SV=1	A0A125QYY4		13157	2	2	2	SISTAYLQWSSLK	K	A	0.997	48.5	26.8	16	48.5	0	1	0	0	2	1483.78	6845.42	13600000	75	87
Mudpit_Aged_L3_4Left_IAF	Tropomyosin 3 isoform 2 OS=Homo sapiens GN=TPM3 PE=2 SV=1	A0A0S2Z4G8	TPM3	28760.9	2	2	3	EQAEAEVASLNR	R	R	0.997	54.4	25	16.4	1.5	0	1	0	0	2	1316.64	2439.63	3628280	43	54
Mudpit_Aged_L3_4Left_IAF	Tropomyosin 3 isoform 2 OS=Homo sapiens GN=TPM3 PE=2 SV=1	A0A0S2Z4G8	TPM3	28760.9	2	2	3	IQVLQQQADDAEER	K	A	0.997	78.9	26.3	17.9	78.9	0	2	0	0	2	1642.8	2989.16	6352520	14	27
Mudpit_Aged_L3_4Left_IAF	Collagen, type V, alpha 1, isoform CRA_a OS=Homo sapiens GN=COL5A1 PE=4 SV=1	A0A024R8E5,B2ZZ86,P20908	COL5A1	183563	5	8	9	ENPGSWFSEFK	K	R	0.995	31.2	25	14.9	31.2	0	1	0	0	2	1327.6	6902.97	16800000	1698	1708
Mudpit_Aged_L3_4Left_IAF	Collagen, type V, alpha 1, isoform CRA_a OS=Homo sapiens GN=COL5A1 PE=4 SV=1	A0A024R8E5,B2ZZ86,P20908	COL5A1	183563	5	8	9	FLGSNDEEMSYDNNPYIR	R	A	0.997	96.9	25	19.1	96.9	0	2	2	0	2	2179.92	6439.51	15000000	1766	1783
Mudpit_Aged_L3_4Left_IAF	Collagen, type V, alpha 1, isoform CRA_a OS=Homo sapiens GN=COL5A1 PE=4 SV=1	A0A024R8E5,B2ZZ86,P20908	COL5A1	183563	5	8	9	QLYPASAFPEDFSILTTVK	K	A	0.997	49.9	31.1	16.1	49.9	0	1	0	0	2	2127.1	9003.04	3085850	89	107
Mudpit_Aged_L3_4Left_IAF	Collagen, type V, alpha 1, isoform CRA_a OS=Homo sapiens GN=COL5A1 PE=4 SV=1	A0A024R8E5,B2ZZ86,P20908	COL5A1	183563	5	8	9	TVLEIDTPK	K	V	0.993	33.6	26.9	15.1	33.6	0	1	0	0	2	1015.57	3794.35	6089010	1798	1806
Mudpit_Aged_L3_4Left_IAF	Collagen, type V, alpha 1, isoform CRA_a OS=Homo sapiens GN=COL5A1 PE=4 SV=1	A0A024R8E5,B2ZZ86,P20908	COL5A1	183563	5	8	9	VEQVPIVDIMFNDFGEASQK	K	F	0.997	57.9	26.3	16.6	57.9	0	1	1	0	2	2266.11	9109.42	9602940	1807	1826
Mudpit_Aged_L3_4Left_IAF	cDNA FLJ52277, highly similar to Follistatin-related protein 1 OS=Homo sapiens PE=2 SV=1	B4DTZ8,Q12841	FSTL1	34985.3	2	2	2	LDSSEFLK	R	F	0.99	40.5	25.8	16.6	39.4	0	1	0	0	2	938.483	4126.82	7340100	163	170
Mudpit_Aged_L3_4Left_IAF	cDNA FLJ52277, highly similar to Follistatin-related protein 1 OS=Homo sapiens PE=2 SV=1	B4DTZ8,Q12841	FSTL1	34985.3	2	2	2	LSFQEFLK	K	C	0.99	38.2	25	15.4	0	0	1	0	0	2	1011.55	6911.68	3594560	213	220
Mudpit_Aged_L3_4Left_IAF	Liver histone H1e OS=Homo sapiens PE=2 SV=1	A3R0T7,A3R0T8,B2R984,P10412,P16403,Q4VB24	HIST1H1C,HIST1H1E	21365.8	3	3	8	ALAAAGYDVEK	K	N	0.997	55.2	27.4	16.5	55.2	0	3	0	0	2	1107.57	2408.16	43700000	65	75
Mudpit_Aged_L3_4Left_IAF	Liver histone H1e OS=Homo sapiens PE=2 SV=1	A3R0T7,A3R0T8,B2R984,P10412,P16403,Q4VB24	HIST1H1C,HIST1H1E	21365.8	3	3	8	ASGPPVSELITK	K	A	0.997	76.4	26.7	17.8	76.4	0	2	0	0	2	1198.67	4168.49	33700000	35	46
Mudpit_Aged_L3_4Left_IAF	Liver histone H1e OS=Homo sapiens PE=2 SV=1	A3R0T7,A3R0T8,B2R984,P10412,P16403,Q4VB24	HIST1H1C,HIST1H1E	21365.8	3	3	8	SGVSLAALK	R	K	0.997	56.8	28	33.3	40	0	3	0	0	2	845.509	3186.88	12900000	55	63
Mudpit_Aged_L3_4Left_IAF	IGK@ protein OS=Homo sapiens GN=IGK@ PE=1 SV=1	Q6PIL8	IGK	25834.3	2	2	9	FSGSGSGTDFTLTISR	R	L	0.997	130	26.3	25.3	126	0	6	0	0	2	1632.79	6039.84	27600000	83	98
Mudpit_Aged_L3_4Left_IAF	IGK@ protein OS=Homo sapiens GN=IGK@ PE=1 SV=1	Q6PIL8	IGK	25834.3	2	2	9	LLIYGVSSR	R	A	0.983	27	25	29.3	12.4	0	3	0	0	2	1007.59	4560.29	14100000	67	75
Mudpit_Aged_L3_4Left_IAF	HHIP-like protein 1 OS=Homo sapiens GN=HHIPL1 PE=2 SV=1	F1T0G3,Q96JK4	HHIPL1	86731.7	5	5	7	AEFGQGGSLPILLDDVR	R	C	0.997	116	26.8	20.3	116	0	1	0	0	2	1786.93	8205.68	3942030	728	744
Mudpit_Aged_L3_4Left_IAF	HHIP-like protein 1 OS=Homo sapiens GN=HHIPL1 PE=2 SV=1	F1T0G3,Q96JK4	HHIPL1	86731.7	5	5	7	FEEVDVVER	K	G	0.997	40.9	27.5	15.6	40.9	0	1	0	0	2	1121.55	3703.65	5635370	425	433
Mudpit_Aged_L3_4Left_IAF	HHIP-like protein 1 OS=Homo sapiens GN=HHIPL1 PE=2 SV=1	F1T0G3,Q96JK4	HHIPL1	86731.7	5	5	7	RAEFGQGGSLPILLDDVR	K	C	0.997	54.7	27	16.4	54.7	0	0	1	0	2	1943.03	6880.48	4415680	727	744
Mudpit_Aged_L3_4Left_IAF	HHIP-like protein 1 OS=Homo sapiens GN=HHIPL1 PE=2 SV=1	F1T0G3,Q96JK4	HHIPL1	86731.7	5	5	7	VEVFVGGR	R	W	0.99	38.8	28.9	15.4	38.8	0	1	0	0	2	862.478	2514.61	6173610	688	695
Mudpit_Aged_L3_4Left_IAF	HHIP-like protein 1 OS=Homo sapiens GN=HHIPL1 PE=2 SV=1	F1T0G3,Q96JK4	HHIPL1	86731.7	5	5	7	VVLTSPWEGDER	R	G	0.997	79.6	25.6	18	79.6	0	3	0	0	2	1387.69	5166.91	18900000	238	249
Mudpit_Aged_L3_4Left_IAF	cDNA FLJ77835, highly similar to Homo sapiens complement component 1, s subcomponent (C1S), transcript variant 2, mRNA OS=Homo sapiens PE=2 SV=1	A8K2N0,B3KNX0,P09871	C1S	76684.2	14	19	42	EDTPNSVWEPAK	K	A	0.997	69	25.5	17.3	69	0	2	0	0	2	1372.64	3567.98	11300000	297	308
Mudpit_Aged_L3_4Left_IAF	cDNA FLJ77835, highly similar to Homo sapiens complement component 1, s subcomponent (C1S), transcript variant 2, mRNA OS=Homo sapiens PE=2 SV=1	A8K2N0,B3KNX0,P09871	C1S	76684.2	14	19	42	EPTMYVGSTSVQTSR	R	L	0.997	79.7	25	18	79.7	0	2	0	0	2	1658.77	2834.44	11300000	482	496
Mudpit_Aged_L3_4Left_IAF	cDNA FLJ77835, highly similar to Homo sapiens complement component 1, s subcomponent (C1S), transcript variant 2, mRNA OS=Homo sapiens PE=2 SV=1	A8K2N0,B3KNX0,P09871	C1S	76684.2	14	19	42	GDSGGAFAVQDPNDK	K	T	0.997	51.7	25	16.2	51.7	0	1	0	0	2	1477.66	2414.61	2113860	630	644
Mudpit_Aged_L3_4Left_IAF	cDNA FLJ77835, highly similar to Homo sapiens complement component 1, s subcomponent (C1S), transcript variant 2, mRNA OS=Homo sapiens PE=2 SV=1	A8K2N0,B3KNX0,P09871	C1S	76684.2	14	19	42	IIGGSDADIK	R	N	0.997	57.1	27.8	28.3	45.4	0	4	0	0	2	988.531	1752.2	46100000	438	447
Mudpit_Aged_L3_4Left_IAF	cDNA FLJ77835, highly similar to Homo sapiens complement component 1, s subcomponent (C1S), transcript variant 2, mRNA OS=Homo sapiens PE=2 SV=1	A8K2N0,B3KNX0,P09871	C1S	76684.2	14	19	42	LLEVPEGR	K	T	0.99	44.2	25.4	21.8	38.2	0	4	0	0	2	912.515	2902.89	172000000	516	523
Mudpit_Aged_L3_4Left_IAF	cDNA FLJ77835, highly similar to Homo sapiens complement component 1, s subcomponent (C1S), transcript variant 2, mRNA OS=Homo sapiens PE=2 SV=1	A8K2N0,B3KNX0,P09871	C1S	76684.2	14	19	42	MGPTVSPICLPGTSSDYNLMDGDLGLISGWGR	K	T	0.984	61.1	25	16.8	30.1	0	0	1	0	2	3383.56	9153.47	1047100	541	572
Mudpit_Aged_L3_4Left_IAF	cDNA FLJ77835, highly similar to Homo sapiens complement component 1, s subcomponent (C1S), transcript variant 2, mRNA OS=Homo sapiens PE=2 SV=1	A8K2N0,B3KNX0,P09871	C1S	76684.2	14	19	42	MLTPEHVFIHPGWK	K	L	0.968	59.5	34.3	16.7	59.5	0	0	0	1	2	1707.87	4423.67	5064510	502	515
Mudpit_Aged_L3_4Left_IAF	cDNA FLJ77835, highly similar to Homo sapiens complement component 1, s subcomponent (C1S), transcript variant 2, mRNA OS=Homo sapiens PE=2 SV=1	A8K2N0,B3KNX0,P09871	C1S	76684.2	14	19	42	NYVDWIMK	K	T	0.98	28.8	25.7	14.8	28.8	0	3	0	0	2	1084.51	5207.66	17700000	670	677
Mudpit_Aged_L3_4Left_IAF	cDNA FLJ77835, highly similar to Homo sapiens complement component 1, s subcomponent (C1S), transcript variant 2, mRNA OS=Homo sapiens PE=2 SV=1	A8K2N0,B3KNX0,P09871	C1S	76684.2	14	19	42	REDFDVEAADSAGNCLDSLVFVAGDR	R	Q	0.997	120	25	20.5	120	0	0	3	0	2	2829.26	8390.51	4157300	220	245
Mudpit_Aged_L3_4Left_IAF	cDNA FLJ77835, highly similar to Homo sapiens complement component 1, s subcomponent (C1S), transcript variant 2, mRNA OS=Homo sapiens PE=2 SV=1	A8K2N0,B3KNX0,P09871	C1S	76684.2	14	19	42	SNALDIIFQTDLTGQK	K	K	0.997	93.5	26.8	19.4	93	0	3	4	0	2	1763.92	8746.91	36200000	265	280
Mudpit_Aged_L3_4Left_IAF	cDNA FLJ77835, highly similar to Homo sapiens complement component 1, s subcomponent (C1S), transcript variant 2, mRNA OS=Homo sapiens PE=2 SV=1	A8K2N0,B3KNX0,P09871	C1S	76684.2	14	19	42	SSNNPHSPIVEEFQVPYNK	R	L	0.997	55.7	26.1	16.5	55.7	0	1	1	0	2	2186.05	5108.46	7434190	87	105
Mudpit_Aged_L3_4Left_IAF	cDNA FLJ77835, highly similar to Homo sapiens complement component 1, s subcomponent (C1S), transcript variant 2, mRNA OS=Homo sapiens PE=2 SV=1	A8K2N0,B3KNX0,P09871	C1S	76684.2	14	19	42	TNFDNDIALVR	R	L	0.997	71.9	28.2	17.5	71.9	0	2	0	0	2	1277.65	5306.13	14700000	524	534
Mudpit_Aged_L3_4Left_IAF	cDNA FLJ77835, highly similar to Homo sapiens complement component 1, s subcomponent (C1S), transcript variant 2, mRNA OS=Homo sapiens PE=2 SV=1	A8K2N0,B3KNX0,P09871	C1S	76684.2	14	19	42	VEDPESTLFGSVIR	K	Y	0.997	107	27.1	19.7	107	0	3	1	0	2	1548.79	7470.85	42000000	370	383
Mudpit_Aged_L3_4Left_IAF	cDNA FLJ77835, highly similar to Homo sapiens complement component 1, s subcomponent (C1S), transcript variant 2, mRNA OS=Homo sapiens PE=2 SV=1	A8K2N0,B3KNX0,P09871	C1S	76684.2	14	19	42	VGATSFYSTCQSNGK	R	W	0.997	59.3	31	16.7	59.3	0	6	0	0	2	1607.7	2869.08	14300000	332	346
Mudpit_Aged_L3_4Left_IAF	cDNA FLJ50237, highly similar to Homo sapiens fibulin 2 (FBLN2), transcript variant 1, mRNA OS=Homo sapiens PE=2 SV=1	B7Z6T9,B7Z9B8,P98095,Q86V58,Q9Y3V7	DKFZp586A1519,FBLN2	126569	2	2	2	DFALDVEMK	R	L	0.997	36.8	25	15.3	36.8	0	1	0	0	2	1067.51	6343.11	3647780	1153	1161
Mudpit_Aged_L3_4Left_IAF	cDNA FLJ50237, highly similar to Homo sapiens fibulin 2 (FBLN2), transcript variant 1, mRNA OS=Homo sapiens PE=2 SV=1	B7Z6T9,B7Z9B8,P98095,Q86V58,Q9Y3V7	DKFZp586A1519,FBLN2	126569	2	2	2	IGPAPAFTGDTIALNIIK	R	G	0.997	85.6	25	18.3	85.6	0	1	0	0	2	1812.03	8454.49	3495470	1106	1123
Mudpit_Aged_L3_4Left_IAF	Protein APOC4-APOC2 OS=Homo sapiens GN=APOC4-APOC2 PE=1 SV=1	K7ER74	APOC4-APOC2	20049.7	3	3	4	ELLETVVNR	K	T	0.997	36	27.3	15.2	36	0	1	0	0	2	1072.6	4342.6	7990670	56	64
Mudpit_Aged_L3_4Left_IAF	Protein APOC4-APOC2 OS=Homo sapiens GN=APOC4-APOC2 PE=1 SV=1	K7ER74	APOC4-APOC2	20049.7	3	3	4	ESLSSYWESAK	K	T	0.997	66.9	25	17.2	66.9	0	2	0	0	2	1286.59	5011.21	11700000	119	129
Mudpit_Aged_L3_4Left_IAF	Protein APOC4-APOC2 OS=Homo sapiens GN=APOC4-APOC2 PE=1 SV=1	K7ER74	APOC4-APOC2	20049.7	3	3	4	TYLPAVDEK	K	L	0.997	43.9	27.1	15.7	43.9	0	1	0	0	2	1035.54	2972.24	15600000	139	147
Mudpit_Aged_L3_4Left_IAF	Chondroitin sulfate proteoglycan 2 (Versican), isoform CRA_b OS=Homo sapiens GN=CSPG2 PE=4 SV=1	A0A024RAQ9,P13611,Q59FG9	CSPG2,VCAN	372813	19	31	116	AQCGGGLLGVR	R	T	0.996	34.8	27	15.2	34.8	0	1	0	0	2	1088.55	3606.47	7861740	313	323
Mudpit_Aged_L3_4Left_IAF	Chondroitin sulfate proteoglycan 2 (Versican), isoform CRA_b OS=Homo sapiens GN=CSPG2 PE=4 SV=1	A0A024RAQ9,P13611,Q59FG9	CSPG2,VCAN	372813	19	31	116	CDVMYGIEDTQDTVSLTVDGVVFHYR	R	A	0.997	103	29	19.5	103	0	0	3	0	2	3036.36	8946.74	82000000	130	155
Mudpit_Aged_L3_4Left_IAF	Chondroitin sulfate proteoglycan 2 (Versican), isoform CRA_b OS=Homo sapiens GN=CSPG2 PE=4 SV=1	A0A024RAQ9,P13611,Q59FG9	CSPG2,VCAN	372813	19	31	116	FTFEEAAK	K	E	0.99	33.6	25	15.1	33.6	0	4	0	0	2	942.457	2937.77	87700000	261	268
Mudpit_Aged_L3_4Left_IAF	Chondroitin sulfate proteoglycan 2 (Versican), isoform CRA_b OS=Homo sapiens GN=CSPG2 PE=4 SV=1	A0A024RAQ9,P13611,Q59FG9	CSPG2,VCAN	372813	19	31	116	FTFEEAAKECENQDAR	K	L	0.991	40.5	25	15.5	40.5	0	0	1	0	2	1945.82	4048.43	4875700	261	276
Mudpit_Aged_L3_4Left_IAF	Chondroitin sulfate proteoglycan 2 (Versican), isoform CRA_b OS=Homo sapiens GN=CSPG2 PE=4 SV=1	A0A024RAQ9,P13611,Q59FG9	CSPG2,VCAN	372813	19	31	116	ITEEFLGK	R	Y	0.99	45.9	25.6	22.1	39.7	0	1	0	0	2	936.504	3280.73	17400000	631	638
Mudpit_Aged_L3_4Left_IAF	Chondroitin sulfate proteoglycan 2 (Versican), isoform CRA_b OS=Homo sapiens GN=CSPG2 PE=4 SV=1	A0A024RAQ9,P13611,Q59FG9	CSPG2,VCAN	372813	19	31	116	LATVGELQAAWR	R	N	0.997	82.8	27.3	18.2	82.8	0	6	4	0	2	1314.72	6036.18	90400000	277	288
Mudpit_Aged_L3_4Left_IAF	Chondroitin sulfate proteoglycan 2 (Versican), isoform CRA_b OS=Homo sapiens GN=CSPG2 PE=4 SV=1	A0A024RAQ9,P13611,Q59FG9	CSPG2,VCAN	372813	19	31	116	LGEPNYGAEIR	R	G	0.997	40.2	26.5	15.5	40.2	0	3	0	0	2	1218.61	3189.79	46000000	1912	1922
Mudpit_Aged_L3_4Left_IAF	Chondroitin sulfate proteoglycan 2 (Versican), isoform CRA_b OS=Homo sapiens GN=CSPG2 PE=4 SV=1	A0A024RAQ9,P13611,Q59FG9	CSPG2,VCAN	372813	19	31	116	LLASDAGLYR	K	C	0.997	75.2	27	20.3	72.6	0	12	0	0	2	1078.59	3947.63	688000000	120	129
Mudpit_Aged_L3_4Left_IAF	Chondroitin sulfate proteoglycan 2 (Versican), isoform CRA_b OS=Homo sapiens GN=CSPG2 PE=4 SV=1	A0A024RAQ9,P13611,Q59FG9	CSPG2,VCAN	372813	19	31	116	LQGAHLTSILSHEEQMFVNR	R	V	0.997	88.6	26	18.5	88.6	0	0	4	2	2	2310.17	6137.45	60100000	3199	3218
Mudpit_Aged_L3_4Left_IAF	Chondroitin sulfate proteoglycan 2 (Versican), isoform CRA_b OS=Homo sapiens GN=CSPG2 PE=4 SV=1	A0A024RAQ9,P13611,Q59FG9	CSPG2,VCAN	372813	19	31	116	MSDLSVIGHPIDSESK	R	E	0.997	114	26.3	20.1	114	0	7	12	0	2	1730.83	4516.68	171000000	1337	1352
Mudpit_Aged_L3_4Left_IAF	Chondroitin sulfate proteoglycan 2 (Versican), isoform CRA_b OS=Homo sapiens GN=CSPG2 PE=4 SV=1	A0A024RAQ9,P13611,Q59FG9	CSPG2,VCAN	372813	19	31	116	NGFDQCDYGWLSDASVR	R	H	0.997	102	25	19.4	102	0	15	4	0	2	1990.82	8484.78	1380000000	289	305
Mudpit_Aged_L3_4Left_IAF	Chondroitin sulfate proteoglycan 2 (Versican), isoform CRA_b OS=Homo sapiens GN=CSPG2 PE=4 SV=1	A0A024RAQ9,P13611,Q59FG9	CSPG2,VCAN	372813	19	31	116	QEIESETTSEEQIQEEK	R	S	0.997	102	25	19.4	102	0	1	0	0	2	2036.91	2571.56	2155420	2108	2124
Mudpit_Aged_L3_4Left_IAF	Chondroitin sulfate proteoglycan 2 (Versican), isoform CRA_b OS=Homo sapiens GN=CSPG2 PE=4 SV=1	A0A024RAQ9,P13611,Q59FG9	CSPG2,VCAN	372813	19	31	116	QEVNPVRQEIESETTSEEQIQEEK	R	S	0.997	91.9	25.5	18.7	91.9	0	0	1	0	2	2859.35	4822.79	1324440	2101	2124
Mudpit_Aged_L3_4Left_IAF	Chondroitin sulfate proteoglycan 2 (Versican), isoform CRA_b OS=Homo sapiens GN=CSPG2 PE=4 SV=1	A0A024RAQ9,P13611,Q59FG9	CSPG2,VCAN	372813	19	31	116	SPQETYDVYCYVDHLDGDVFHLTVPSK	R	F	0.997	73.6	25	17.6	73.6	0	0	2	3	2	3185.44	8886.27	93200000	234	260
Mudpit_Aged_L3_4Left_IAF	Chondroitin sulfate proteoglycan 2 (Versican), isoform CRA_b OS=Homo sapiens GN=CSPG2 PE=4 SV=1	A0A024RAQ9,P13611,Q59FG9	CSPG2,VCAN	372813	19	31	116	TEEEVFSGMK	K	L	0.997	34.1	25	15.1	34.1	0	1	0	0	2	1156.52	3173.7	4237200	716	725
Mudpit_Aged_L3_4Left_IAF	Chondroitin sulfate proteoglycan 2 (Versican), isoform CRA_b OS=Homo sapiens GN=CSPG2 PE=4 SV=1	A0A024RAQ9,P13611,Q59FG9	CSPG2,VCAN	372813	19	31	116	VGHDYQWIGLNDK	R	M	0.997	98.4	26.4	19.2	98.4	0	1	2	0	2	1544.75	4393.16	104000000	3219	3231
Mudpit_Aged_L3_4Left_IAF	Chondroitin sulfate proteoglycan 2 (Versican), isoform CRA_b OS=Homo sapiens GN=CSPG2 PE=4 SV=1	A0A024RAQ9,P13611,Q59FG9	CSPG2,VCAN	372813	19	31	116	VSVPTHPEAVGDASLTVVK	R	L	0.997	84	25.9	18.2	84	0	5	10	0	2	1906.03	4837.16	347000000	101	119
Mudpit_Aged_L3_4Left_IAF	Chondroitin sulfate proteoglycan 2 (Versican), isoform CRA_b OS=Homo sapiens GN=CSPG2 PE=4 SV=1	A0A024RAQ9,P13611,Q59FG9	CSPG2,VCAN	372813	19	31	116	YEINSLIR	R	Y	0.99	40.1	27.5	29.4	26.3	0	2	0	0	2	1007.55	4808.52	22500000	3315	3322
Mudpit_Aged_L3_4Left_IAF	Chondroitin sulfate proteoglycan 2 (Versican), isoform CRA_b OS=Homo sapiens GN=CSPG2 PE=4 SV=1	A0A024RAQ9,P13611,Q59FG9	CSPG2,VCAN	372813	19	31	116	YTLNFEAAQK	R	A	0.997	63	25.3	24.7	55.2	0	9	0	0	2	1184.59	4254.15	132000000	161	170
Mudpit_Aged_L3_4Left_IAF	Chordin OS=Homo sapiens GN=CHRD PE=1 SV=1	E7ESX1,Q9H2X0	CHRD	102030	3	3	4	DLEPELLR	K	H	0.99	39	25	15.4	39	0	1	0	0	2	984.536	5493.84	7590870	613	620
Mudpit_Aged_L3_4Left_IAF	Chordin OS=Homo sapiens GN=CHRD PE=1 SV=1	E7ESX1,Q9H2X0	CHRD	102030	3	3	4	GDGHTDFVALLTGPR	R	S	0.975	36.3	26.5	15.3	36.3	0	0	2	0	2	1555.79	7337.03	7216770	166	180
Mudpit_Aged_L3_4Left_IAF	Chordin OS=Homo sapiens GN=CHRD PE=1 SV=1	E7ESX1,Q9H2X0	CHRD	102030	3	3	4	LQILHQGQLLR	R	E	0.985	29	25	31.7	12.1	0	1	0	0	2	1318.8	4014.81	4792090	336	346
Mudpit_Aged_L3_4Left_IAF	Complement C4-A OS=Homo sapiens GN=C4A PE=1 SV=1	A0A0G2JPR0,A0A140TA49_HUMAN	C4A	192877	35	54	129	ADGSYAAWLSR	K	D	0.997	77.8	25.7	17.9	77.8	0	4	0	0	2	1196.57	5384.98	28300000	1062	1072
Mudpit_Aged_L3_4Left_IAF	Complement C4-A OS=Homo sapiens GN=C4A PE=1 SV=1	A0A0G2JPR0,A0A140TA49_HUMAN	C4A	192877	35	54	129	AEFQDALEK	K	L	0.997	53.3	26.4	16.3	53.3	0	3	0	0	2	1050.51	2859.39	44800000	317	325
Mudpit_Aged_L3_4Left_IAF	Complement C4-A OS=Homo sapiens GN=C4A PE=1 SV=1	A0A0G2JPR0,A0A140TA49_HUMAN	C4A	192877	35	54	129	AEMADQAAAWLTR	K	Q	0.997	79	25.2	17.9	79	0	4	2	0	2	1433.68	5723.58	54400000	1279	1291
Mudpit_Aged_L3_4Left_IAF	Complement C4-A OS=Homo sapiens GN=C4A PE=1 SV=1	A0A0G2JPR0,A0A140TA49_HUMAN	C4A	192877	35	54	129	ALEILQEEDLIDEDDIPVR	R	S	0.997	113	27.3	20.1	113	0	5	4	0	2	2225.12	8868.67	198000000	757	775
Mudpit_Aged_L3_4Left_IAF	Complement C4-A OS=Homo sapiens GN=C4A PE=1 SV=1	A0A0G2JPR0,A0A140TA49_HUMAN	C4A	192877	35	54	129	DFALLSLQVPLK	R	D	0.997	68.8	25	17.3	68.8	0	1	0	0	2	1343.79	9033.28	153000000	81	92
Mudpit_Aged_L3_4Left_IAF	Complement C4-A OS=Homo sapiens GN=C4A PE=1 SV=1	A0A0G2JPR0,A0A140TA49_HUMAN	C4A	192877	35	54	129	DHAVDLIQK	K	G	0.968	27	25	14.7	27	0	1	0	0	2	1038.56	1971.97	10100000	1043	1051
Mudpit_Aged_L3_4Left_IAF	Complement C4-A OS=Homo sapiens GN=C4A PE=1 SV=1	A0A0G2JPR0,A0A140TA49_HUMAN	C4A	192877	35	54	129	DSSTWLTAFVLK	R	V	0.997	61.5	26.7	16.8	61.5	0	1	0	0	2	1367.72	9078.64	29900000	1073	1084
Mudpit_Aged_L3_4Left_IAF	Complement C4-A OS=Homo sapiens GN=C4A PE=1 SV=1	A0A0G2JPR0,A0A140TA49_HUMAN	C4A	192877	35	54	129	EELVYELNPLDHR	R	G	0.997	89.9	26.4	18.6	89.9	0	1	1	0	2	1626.81	6411.06	49900000	942	954
Mudpit_Aged_L3_4Left_IAF	Complement C4-A OS=Homo sapiens GN=C4A PE=1 SV=1	A0A0G2JPR0,A0A140TA49_HUMAN	C4A	192877	35	54	129	EGAIHREELVYELNPLDHR	K	G	0.981	41.3	26.7	15.6	41.3	0	0	1	1	2	2290.16	5224.1	74500000	936	954
Mudpit_Aged_L3_4Left_IAF	Complement C4-A OS=Homo sapiens GN=C4A PE=1 SV=1	A0A0G2JPR0,A0A140TA49_HUMAN	C4A	192877	35	54	129	EMSGSPASGIPVK	R	V	0.997	61.8	25.8	16.9	61.8	0	3	0	0	2	1275.63	1890.64	84000000	392	404
Mudpit_Aged_L3_4Left_IAF	Complement C4-A OS=Homo sapiens GN=C4A PE=1 SV=1	A0A0G2JPR0,A0A140TA49_HUMAN	C4A	192877	35	54	129	EVYMPSSIFQDDFVIPDISEPGTWK	K	I	0.997	54.7	25.1	16.4	54.7	0	2	4	0	2	2916.37	9122.93	72800000	190	214
Mudpit_Aged_L3_4Left_IAF	Complement C4-A OS=Homo sapiens GN=C4A PE=1 SV=1	A0A0G2JPR0,A0A140TA49_HUMAN	C4A	192877	35	54	129	FEQLELRPVLYNYLDK	R	N	0.997	68.4	25.9	17.3	68.4	0	3	0	0	2	2040.08	7621.99	13800000	846	861
Mudpit_Aged_L3_4Left_IAF	Complement C4-A OS=Homo sapiens GN=C4A PE=1 SV=1	A0A0G2JPR0,A0A140TA49_HUMAN	C4A	192877	35	54	129	FGLLDEDGK	R	K	0.997	53.3	26.3	16.3	53.3	0	4	0	0	2	993.489	4714.51	35300000	284	292
Mudpit_Aged_L3_4Left_IAF	Complement C4-A OS=Homo sapiens GN=C4A PE=1 SV=1	A0A0G2JPR0,A0A140TA49_HUMAN	C4A	192877	35	54	129	FGLLDEDGKK	R	T	0.997	45.3	27.3	15.8	45.3	0	1	1	0	2	1121.58	2684.06	18400000	284	293
Mudpit_Aged_L3_4Left_IAF	Complement C4-A OS=Homo sapiens GN=C4A PE=1 SV=1	A0A0G2JPR0,A0A140TA49_HUMAN	C4A	192877	35	54	129	GCGEQTMIYLAPTLAASR	R	Y	0.997	64.9	25	17.1	64.9	0	2	0	0	2	1955.92	6692.06	7309860	1009	1026
Mudpit_Aged_L3_4Left_IAF	Complement C4-A OS=Homo sapiens GN=C4A PE=1 SV=1	A0A0G2JPR0,A0A140TA49_HUMAN	C4A	192877	35	54	129	GHLFLQTDQPIYNPGQR	R	V	0.997	132	26.3	21.3	132	0	2	3	0	2	1984	5154.56	54200000	139	155
Mudpit_Aged_L3_4Left_IAF	Complement C4-A OS=Homo sapiens GN=C4A PE=1 SV=1	A0A0G2JPR0,A0A140TA49_HUMAN	C4A	192877	35	54	129	GLEEELQFSLGSK	R	I	0.997	87.6	26.9	18.5	87.6	0	3	0	0	2	1436.73	7039.22	29800000	1353	1365
Mudpit_Aged_L3_4Left_IAF	Complement C4-A OS=Homo sapiens GN=C4A PE=1 SV=1	A0A0G2JPR0,A0A140TA49_HUMAN	C4A	192877	35	54	129	GPEVQLVAHSPWLK	R	D	0.997	86.6	26.5	18.4	86.6	0	2	1	0	2	1560.85	5526.88	59300000	105	118
Mudpit_Aged_L3_4Left_IAF	Complement C4-A OS=Homo sapiens GN=C4A PE=1 SV=1	A0A0G2JPR0,A0A140TA49_HUMAN	C4A	192877	35	54	129	GSFEFPVGDAVSK	R	V	0.997	37.7	26.2	15.4	37.7	0	2	0	0	2	1339.65	5871.44	170000000	917	929
Mudpit_Aged_L3_4Left_IAF	Complement C4-A OS=Homo sapiens GN=C4A PE=1 SV=1	A0A0G2JPR0,A0A140TA49_HUMAN	C4A	192877	35	54	129	ITPGKPYILTVPGHLDEMQLDIQAR	K	Y	0.996	64.2	25	17	64.2	0	0	0	2	2	2805.5	7183.02	9175610	245	269
Mudpit_Aged_L3_4Left_IAF	Complement C4-A OS=Homo sapiens GN=C4A PE=1 SV=1	A0A0G2JPR0,A0A140TA49_HUMAN	C4A	192877	35	54	129	LELSVDGAK	K	Q	0.997	59	28.4	32.3	43.4	0	5	0	0	2	931.51	3039.97	49000000	571	579
Mudpit_Aged_L3_4Left_IAF	Complement C4-A OS=Homo sapiens GN=C4A PE=1 SV=1	A0A0G2JPR0,A0A140TA49_HUMAN	C4A	192877	35	54	129	LNMGITDLQGLR	K	L	0.997	71.6	26	17.5	71.6	0	4	0	0	2	1330.72	5775.46	33700000	326	337
Mudpit_Aged_L3_4Left_IAF	Complement C4-A OS=Homo sapiens GN=C4A PE=1 SV=1	A0A0G2JPR0,A0A140TA49_HUMAN	C4A	192877	35	54	129	LVNGQSHISLSK	K	A	0.997	69.2	25	17.3	69.2	0	0	2	0	2	1282.71	1350.49	14200000	305	316
Mudpit_Aged_L3_4Left_IAF	Complement C4-A OS=Homo sapiens GN=C4A PE=1 SV=1	A0A0G2JPR0,A0A140TA49_HUMAN	C4A	192877	35	54	129	MRPSTDTITVMVENSHGLR	K	V	0.997	63.1	26.7	16.9	63.1	0	0	1	3	2	2144.06	4902.22	39800000	167	185
Mudpit_Aged_L3_4Left_IAF	Complement C4-A OS=Homo sapiens GN=C4A PE=1 SV=1	A0A0G2JPR0,A0A140TA49_HUMAN	C4A	192877	35	54	129	STQDTVIALDALSAYWIASHTTEER	R	G	0.997	137	26.2	21.5	137	0	2	1	0	2	2778.36	9027.86	277000000	1301	1325
Mudpit_Aged_L3_4Left_IAF	Complement C4-A OS=Homo sapiens GN=C4A PE=1 SV=1	A0A0G2JPR0,A0A140TA49_HUMAN	C4A	192877	35	54	129	TEQWSTLPPETK	K	D	0.997	62.1	25.4	16.9	62.1	0	12	0	0	2	1416.7	3992.89	154000000	1031	1042
Mudpit_Aged_L3_4Left_IAF	Complement C4-A OS=Homo sapiens GN=C4A PE=1 SV=1	A0A0G2JPR0,A0A140TA49_HUMAN	C4A	192877	35	54	129	TTNIQGINLLFSSR	R	R	0.997	63	26.4	16.9	63	0	2	0	0	2	1563.85	7390.65	11300000	124	137
Mudpit_Aged_L3_4Left_IAF	Complement C4-A OS=Homo sapiens GN=C4A PE=1 SV=1	A0A0G2JPR0,A0A140TA49_HUMAN	C4A	192877	35	54	129	TYNVLDMK	R	N	0.99	42.5	25	15.7	42.5	0	5	0	0	2	999.482	4123.08	45800000	1383	1390
Mudpit_Aged_L3_4Left_IAF	Complement C4-A OS=Homo sapiens GN=C4A PE=1 SV=1	A0A0G2JPR0,A0A140TA49_HUMAN	C4A	192877	35	54	129	VDFTLSSER	K	D	0.997	52.7	26.2	27.1	41.9	0	3	0	0	2	1053.52	3914.72	35600000	72	80
Mudpit_Aged_L3_4Left_IAF	Complement C4-A OS=Homo sapiens GN=C4A PE=1 SV=1	A0A0G2JPR0,A0A140TA49_HUMAN	C4A	192877	35	54	129	VEYGFQVK	R	V	0.99	37.6	25.8	16.5	36.5	0	3	0	0	2	969.504	3250.29	28200000	1623	1630
Mudpit_Aged_L3_4Left_IAF	Complement C4-A OS=Homo sapiens GN=C4A PE=1 SV=1	A0A0G2JPR0,A0A140TA49_HUMAN	C4A	192877	35	54	129	VGDTLNLNLR	R	A	0.997	48.8	27.1	30.6	34.2	0	2	0	0	2	1114.62	4806.21	38500000	485	494
Mudpit_Aged_L3_4Left_IAF	Complement C4-A OS=Homo sapiens GN=C4A PE=1 SV=1	A0A0G2JPR0,A0A140TA49_HUMAN	C4A	192877	35	54	129	VLSLAQEQVGGSPEK	K	L	0.997	110	26.2	19.9	110	0	4	1	0	2	1541.82	3622.6	278000000	1085	1099
Mudpit_Aged_L3_4Left_IAF	Complement C4-A OS=Homo sapiens GN=C4A PE=1 SV=1	A0A0G2JPR0,A0A140TA49_HUMAN	C4A	192877	35	54	129	VTASDPLDTLGSEGALSPGGVASLLR	R	L	0.997	133	25.8	21.3	133	0	6	4	0	2	2483.3	9030.01	199000000	980	1005
Mudpit_Aged_L3_4Left_IAF	Complement C4-A OS=Homo sapiens GN=C4A PE=1 SV=1	A0A0G2JPR0,A0A140TA49_HUMAN	C4A	192877	35	54	129	YVLPNFEVK	K	I	0.997	41.9	25.6	15.6	41.9	0	2	0	0	2	1108.6	5978.28	35600000	236	244
Mudpit_Aged_L3_4Left_IAF	Complement C4-A OS=Homo sapiens GN=C4A PE=1 SV=1	A0A0G2JPR0,A0A140TA49_HUMAN	C4A	192877	35	54	129	YVSHFETEGPHVLLYFDSVPTSR	R	E	0.997	59.7	25.8	16.7	59.7	0	0	3	0	2	2680.3	6775.32	38500000	1511	1533
Mudpit_Aged_L3_4Left_IAF	Inter-alpha (Globulin) inhibitor H4 (Plasma Kallikrein-sensitive glycoprotein) OS=Homo sapiens GN=ITIH4 PE=2 SV=1	B2RMS9,Q14624	ITIH4	103358	20	35	89	AEAQAQYSAAVAK	K	G	0.997	71.4	27.9	17.5	71.4	0	4	0	0	2	1307.66	1402.06	25800000	99	111
Mudpit_Aged_L3_4Left_IAF	Inter-alpha (Globulin) inhibitor H4 (Plasma Kallikrein-sensitive glycoprotein) OS=Homo sapiens GN=ITIH4 PE=2 SV=1	B2RMS9,Q14624	ITIH4	103358	20	35	89	AISGGSIQIENGYFVHYFAPEGLTTMPK	R	N	0.997	66.4	26.3	17.1	66.4	0	0	2	0	2	3027.49	8346.55	15700000	246	273
Mudpit_Aged_L3_4Left_IAF	Inter-alpha (Globulin) inhibitor H4 (Plasma Kallikrein-sensitive glycoprotein) OS=Homo sapiens GN=ITIH4 PE=2 SV=1	B2RMS9,Q14624	ITIH4	103358	20	35	89	ANTVQEATFQMELPK	R	K	0.997	99.5	26.2	19.2	99.5	0	7	4	0	2	1722.84	4817.7	126000000	61	75
Mudpit_Aged_L3_4Left_IAF	Inter-alpha (Globulin) inhibitor H4 (Plasma Kallikrein-sensitive glycoprotein) OS=Homo sapiens GN=ITIH4 PE=2 SV=1	B2RMS9,Q14624	ITIH4	103358	20	35	89	DQFNLIVFSTEATQWRPSLVPASAENVNK	R	A	0.997	58.5	26.2	16.7	58.5	0	0	1	0	2	3261.65	9025.85	9982510	308	336
Mudpit_Aged_L3_4Left_IAF	Inter-alpha (Globulin) inhibitor H4 (Plasma Kallikrein-sensitive glycoprotein) OS=Homo sapiens GN=ITIH4 PE=2 SV=1	B2RMS9,Q14624	ITIH4	103358	20	35	89	ETLFSVMPGLK	K	M	0.997	60.9	28	16.8	60.9	0	5	0	0	2	1221.65	7414.87	127000000	816	826
Mudpit_Aged_L3_4Left_IAF	Inter-alpha (Globulin) inhibitor H4 (Plasma Kallikrein-sensitive glycoprotein) OS=Homo sapiens GN=ITIH4 PE=2 SV=1	B2RMS9,Q14624	ITIH4	103358	20	35	89	FSSHVGGTLGQFYQEVLWGSPAASDDGR	R	R	0.997	113	25	20.1	113	0	2	4	1	2	2968.39	8710.39	41700000	867	894
Mudpit_Aged_L3_4Left_IAF	Inter-alpha (Globulin) inhibitor H4 (Plasma Kallikrein-sensitive glycoprotein) OS=Homo sapiens GN=ITIH4 PE=2 SV=1	B2RMS9,Q14624	ITIH4	103358	20	35	89	FSSHVGGTLGQFYQEVLWGSPAASDDGRR	R	T	0.989	50.8	29.5	16.2	50.8	0	0	0	2	2	3124.49	7636.36	12100000	867	895
Mudpit_Aged_L3_4Left_IAF	Inter-alpha (Globulin) inhibitor H4 (Plasma Kallikrein-sensitive glycoprotein) OS=Homo sapiens GN=ITIH4 PE=2 SV=1	B2RMS9,Q14624	ITIH4	103358	20	35	89	GPDVLTATVSGK	R	L	0.997	56.7	27.1	16.5	56.7	0	4	0	0	2	1144.62	3529.32	45000000	501	512
Mudpit_Aged_L3_4Left_IAF	Inter-alpha (Globulin) inhibitor H4 (Plasma Kallikrein-sensitive glycoprotein) OS=Homo sapiens GN=ITIH4 PE=2 SV=1	B2RMS9,Q14624	ITIH4	103358	20	35	89	ILDDLSPR	K	D	0.99	51.6	26.1	21.6	46.2	0	5	0	0	2	928.51	3551.3	48700000	300	307
Mudpit_Aged_L3_4Left_IAF	Inter-alpha (Globulin) inhibitor H4 (Plasma Kallikrein-sensitive glycoprotein) OS=Homo sapiens GN=ITIH4 PE=2 SV=1	B2RMS9,Q14624	ITIH4	103358	20	35	89	IPKPEASFSPR	K	R	0.997	52	25.5	16.3	52	0	0	3	0	2	1228.67	2047.34	10700000	634	644
Mudpit_Aged_L3_4Left_IAF	Inter-alpha (Globulin) inhibitor H4 (Plasma Kallikrein-sensitive glycoprotein) OS=Homo sapiens GN=ITIH4 PE=2 SV=1	B2RMS9,Q14624	ITIH4	103358	20	35	89	LALDNGGLAR	K	R	0.997	43.4	25.3	15.7	43.4	0	3	0	0	2	999.558	3161.49	28400000	429	438
Mudpit_Aged_L3_4Left_IAF	Inter-alpha (Globulin) inhibitor H4 (Plasma Kallikrein-sensitive glycoprotein) OS=Homo sapiens GN=ITIH4 PE=2 SV=1	B2RMS9,Q14624	ITIH4	103358	20	35	89	LGVYELLLK	R	V	0.997	62.8	25	17.6	62.1	0	6	0	0	2	1047.65	7435.85	27000000	154	162
Mudpit_Aged_L3_4Left_IAF	Inter-alpha (Globulin) inhibitor H4 (Plasma Kallikrein-sensitive glycoprotein) OS=Homo sapiens GN=ITIH4 PE=2 SV=1	B2RMS9,Q14624	ITIH4	103358	20	35	89	NMEQFQVSVSVAPNAK	R	I	0.997	95.3	27	19	95.3	0	6	3	0	2	1748.86	5513.49	80800000	124	139
Mudpit_Aged_L3_4Left_IAF	Inter-alpha (Globulin) inhibitor H4 (Plasma Kallikrein-sensitive glycoprotein) OS=Homo sapiens GN=ITIH4 PE=2 SV=1	B2RMS9,Q14624	ITIH4	103358	20	35	89	NPLVWVHASPEHVVVTR	K	N	0.997	66	25.4	17.1	66	0	1	1	0	2	1940.05	4679.93	28600000	789	805
Mudpit_Aged_L3_4Left_IAF	Inter-alpha (Globulin) inhibitor H4 (Plasma Kallikrein-sensitive glycoprotein) OS=Homo sapiens GN=ITIH4 PE=2 SV=1	B2RMS9,Q14624	ITIH4	103358	20	35	89	NVVFVIDK	K	S	0.99	32.7	28.3	15	32.7	0	3	0	0	2	933.54	4541.36	64700000	274	281
Mudpit_Aged_L3_4Left_IAF	Inter-alpha (Globulin) inhibitor H4 (Plasma Kallikrein-sensitive glycoprotein) OS=Homo sapiens GN=ITIH4 PE=2 SV=1	B2RMS9,Q14624	ITIH4	103358	20	35	89	QGPVNLLSDPEQGVEVTGQYER	R	E	0.997	86.2	25.9	18.4	86.2	0	1	1	0	2	2415.18	6826.09	42700000	754	775
Mudpit_Aged_L3_4Left_IAF	Inter-alpha (Globulin) inhibitor H4 (Plasma Kallikrein-sensitive glycoprotein) OS=Homo sapiens GN=ITIH4 PE=2 SV=1	B2RMS9,Q14624	ITIH4	103358	20	35	89	QLGLPGPPDVPDHAAYHPFR	R	R	0.997	80.1	26.4	18	80.1	0	1	4	2	2	2184.1	5641.71	60700000	669	688
Mudpit_Aged_L3_4Left_IAF	Inter-alpha (Globulin) inhibitor H4 (Plasma Kallikrein-sensitive glycoprotein) OS=Homo sapiens GN=ITIH4 PE=2 SV=1	B2RMS9,Q14624	ITIH4	103358	20	35	89	SFAAGIQALGGTNINDAMLMAVQLLDSSNQEER	R	L	0.961	40.1	26.6	15.5	40.1	0	0	1	0	2	3496.67	9007.13	1259840	339	371
Mudpit_Aged_L3_4Left_IAF	Inter-alpha (Globulin) inhibitor H4 (Plasma Kallikrein-sensitive glycoprotein) OS=Homo sapiens GN=ITIH4 PE=2 SV=1	B2RMS9,Q14624	ITIH4	103358	20	35	89	SPEQQETVLDGNLIIR	K	Y	0.997	91.8	26.3	18.7	91.8	0	5	3	0	2	1811.95	6169.9	532000000	225	240
Mudpit_Aged_L3_4Left_IAF	Inter-alpha (Globulin) inhibitor H4 (Plasma Kallikrein-sensitive glycoprotein) OS=Homo sapiens GN=ITIH4 PE=2 SV=1	B2RMS9,Q14624	ITIH4	103358	20	35	89	TGLLLLSDPDK	K	V	0.997	70.3	26.9	37	50.7	0	4	0	0	2	1171.66	6088.98	40700000	832	842
Mudpit_Aged_L3_4Left_IAF	cDNA FLJ59433, highly similar to Elongation factor 1-gamma OS=Homo sapiens PE=2 SV=1	B4DUP0,P26641,Q53YD7	EEF1G	50119.4	2	2	2	ILGLLDAYLK	R	T	0.973	25	25	14.6	25	0	1	0	0	2	1118.68	8534.13	6040840	138	147
Mudpit_Aged_L3_4Left_IAF	cDNA FLJ59433, highly similar to Elongation factor 1-gamma OS=Homo sapiens PE=2 SV=1	B4DUP0,P26641,Q53YD7	EEF1G	50119.4	2	2	2	LDPGSEETQTLVR	K	E	0.997	80.4	26	18	80.4	0	1	0	0	2	1444.73	3695.04	4476210	402	414
Mudpit_Aged_L3_4Left_IAF	Heparin cofactor 2 OS=Homo sapiens GN=SERPIND1 PE=1 SV=3	P05546	SERPIND1	57072.9	9	13	25	EYYFAEAQIADFSDPAFISK	R	T	0.997	94.7	25	18.9	94.7	0	3	1	0	2	2312.08	8984.48	56300000	242	261
Mudpit_Aged_L3_4Left_IAF	Heparin cofactor 2 OS=Homo sapiens GN=SERPIND1 PE=1 SV=3	P05546	SERPIND1	57072.9	9	13	25	FPVEMTHNHNFR	K	L	0.989	47.3	25	16	47.3	0	0	0	1	2	1528.71	1957.64	7526110	303	314
Mudpit_Aged_L3_4Left_IAF	Heparin cofactor 2 OS=Homo sapiens GN=SERPIND1 PE=1 SV=3	P05546	SERPIND1	57072.9	9	13	25	GGETAQSADPQWEQLNNK	K	N	0.997	83	25	18.2	83	0	1	1	0	2	1972.9	3710.82	14800000	31	48
Mudpit_Aged_L3_4Left_IAF	Heparin cofactor 2 OS=Homo sapiens GN=SERPIND1 PE=1 SV=3	P05546	SERPIND1	57072.9	9	13	25	GPLDQLEK	K	G	0.99	45.3	25	23.7	37.5	0	2	0	0	2	899.484	3391.78	32900000	23	30
Mudpit_Aged_L3_4Left_IAF	Heparin cofactor 2 OS=Homo sapiens GN=SERPIND1 PE=1 SV=3	P05546	SERPIND1	57072.9	9	13	25	HQGTITVNEEGTQATTVTTVGFMPLSTQVR	K	F	0.997	110	25.1	19.9	110	0	0	6	0	2	3219.6	6433.89	29800000	439	468
Mudpit_Aged_L3_4Left_IAF	Heparin cofactor 2 OS=Homo sapiens GN=SERPIND1 PE=1 SV=3	P05546	SERPIND1	57072.9	9	13	25	NYNLVESLK	K	L	0.997	37.2	26.5	16.1	36.4	0	1	0	0	2	1079.57	4525.67	81200000	402	410
Mudpit_Aged_L3_4Left_IAF	Heparin cofactor 2 OS=Homo sapiens GN=SERPIND1 PE=1 SV=3	P05546	SERPIND1	57072.9	9	13	25	QFPILLDFK	K	T	0.997	42	25.3	15.6	42	0	3	0	0	2	1120.64	8301.36	54900000	229	237
Mudpit_Aged_L3_4Left_IAF	Heparin cofactor 2 OS=Homo sapiens GN=SERPIND1 PE=1 SV=3	P05546	SERPIND1	57072.9	9	13	25	TLEAQLTPR	K	V	0.997	38.3	27.3	15.4	38.3	0	1	0	0	2	1028.57	2648.14	15700000	368	376
Mudpit_Aged_L3_4Left_IAF	Heparin cofactor 2 OS=Homo sapiens GN=SERPIND1 PE=1 SV=3	P05546	SERPIND1	57072.9	9	13	25	YEITTIHNLFR	K	K	0.997	66.1	27.1	17.1	66.1	0	3	2	0	2	1406.74	5691.53	69000000	193	203
Mudpit_Aged_L3_4Left_IAF	Thyroxine-binding globulin OS=Homo sapiens GN=SERPINA7 PE=1 SV=2	P05543	SERPINA7	46325.6	6	7	9	AQWANPFDPSK	K	T	0.988	28.4	25	14.8	28.4	0	2	0	0	2	1260.6	5658.89	46100000	208	218
Mudpit_Aged_L3_4Left_IAF	Thyroxine-binding globulin OS=Homo sapiens GN=SERPINA7 PE=1 SV=2	P05543	SERPINA7	46325.6	6	7	9	EGQMESVEAAMSSK	K	T	0.997	78.8	25	17.9	78.8	0	3	0	0	2	1483.64	2158.16	12500000	274	287
Mudpit_Aged_L3_4Left_IAF	Thyroxine-binding globulin OS=Homo sapiens GN=SERPINA7 PE=1 SV=2	P05543	SERPINA7	46325.6	6	7	9	FSISATYDLGATLLK	K	M	0.997	43.5	26.8	15.7	43.5	0	1	0	0	2	1599.86	8672.22	3034690	308	322
Mudpit_Aged_L3_4Left_IAF	Thyroxine-binding globulin OS=Homo sapiens GN=SERPINA7 PE=1 SV=2	P05543	SERPINA7	46325.6	6	7	9	GTEAAAVPEVELSDQPENTFLHPIIQIDR	K	S	0.997	52.4	25.2	16.3	52.4	0	0	1	0	2	3189.61	8538.65	9373020	361	389
Mudpit_Aged_L3_4Left_IAF	Thyroxine-binding globulin OS=Homo sapiens GN=SERPINA7 PE=1 SV=2	P05543	SERPINA7	46325.6	6	7	9	MSSINADFAFNLYR	K	R	0.997	69	25	17.3	69	0	1	0	0	2	1664.77	7351.1	1918020	42	55
Mudpit_Aged_L3_4Left_IAF	Thyroxine-binding globulin OS=Homo sapiens GN=SERPINA7 PE=1 SV=2	P05543	SERPINA7	46325.6	6	7	9	TEDSSSFLIDK	K	T	0.997	41.8	25	15.6	41.8	0	1	0	0	2	1241.59	4016.89	16300000	219	229
Mudpit_Aged_L3_4Left_IAF	Reticulocalbin-3 OS=Homo sapiens GN=RCN3 PE=1 SV=1	Q96D15	RCN3	37492.9	6	8	10	AGDGDGWVSLAELR	R	A	0.997	100	25.7	19.3	100	0	1	0	0	2	1445.7	7273.63	13100000	90	103
Mudpit_Aged_L3_4Left_IAF	Reticulocalbin-3 OS=Homo sapiens GN=RCN3 PE=1 SV=1	Q96D15	RCN3	37492.9	6	8	10	DGYVQVEEYIADLYSAEPGEEEPAWVQTER	K	Q	0.996	55.2	25	16.5	55.2	0	0	1	0	2	3472.57	9197.71	5261440	217	246
Mudpit_Aged_L3_4Left_IAF	Reticulocalbin-3 OS=Homo sapiens GN=RCN3 PE=1 SV=1	Q96D15	RCN3	37492.9	6	8	10	DIVIAETLEDLDR	R	N	0.997	78.4	27.9	17.9	78.4	0	1	1	0	2	1501.77	8693.31	8198300	202	214
Mudpit_Aged_L3_4Left_IAF	Reticulocalbin-3 OS=Homo sapiens GN=RCN3 PE=1 SV=1	Q96D15	RCN3	37492.9	6	8	10	DSVSAAWDTYDTDRDGR	R	V	0.997	60.1	25	16.8	60.1	0	1	1	0	2	1929.82	4659.61	11100000	116	132
Mudpit_Aged_L3_4Left_IAF	Reticulocalbin-3 OS=Homo sapiens GN=RCN3 PE=1 SV=1	Q96D15	RCN3	37492.9	6	8	10	EELTAFLHPEEFPHMR	R	D	0.954	31.1	25.4	14.9	31.1	0	0	0	1	2	1982.94	6555.83	16600000	186	201
Mudpit_Aged_L3_4Left_IAF	Reticulocalbin-3 OS=Homo sapiens GN=RCN3 PE=1 SV=1	Q96D15	RCN3	37492.9	6	8	10	EFDQLTPEESQAR	K	L	0.997	63	27.1	16.9	63	0	3	0	0	2	1549.71	3784.76	7467690	67	79
Mudpit_Aged_L3_4Left_IAF	Copine III, isoform CRA_a OS=Homo sapiens GN=CPNE3 PE=4 SV=1	A0A024R994,O75131	CPNE3	60131.6	2	2	2	DIVQFVPFR	R	Q	0.987	33.6	26.3	15.1	33.6	0	1	0	0	2	1120.62	7816.36	4359070	485	493
Mudpit_Aged_L3_4Left_IAF	Copine III, isoform CRA_a OS=Homo sapiens GN=CPNE3 PE=4 SV=1	A0A024R994,O75131	CPNE3	60131.6	2	2	2	VVLFEMEAR	R	K	0.971	29.9	26.7	14.9	29.9	0	1	0	0	2	1093.57	5623.27	7304700	140	148
Mudpit_Aged_L3_4Left_IAF	IGL@ protein OS=Homo sapiens GN=IGL@ PE=1 SV=1	Q8N355	IGL	24791.9	7	10	62	AAPSVTLFPPSSEELQANK	K	A	0.997	84	25.9	18.3	84	0	24	13	0	2	1986.02	6399.18	1330000000	133	151
Mudpit_Aged_L3_4Left_IAF	IGL@ protein OS=Homo sapiens GN=IGL@ PE=1 SV=1	Q8N355	IGL	24791.9	7	10	62	ADSSPVKAGVETTTPSK	K	Q	0.997	61.1	27.1	16.8	61.1	0	0	1	0	2	1674.85	1254	8543500	172	188
Mudpit_Aged_L3_4Left_IAF	IGL@ protein OS=Homo sapiens GN=IGL@ PE=1 SV=1	Q8N355	IGL	24791.9	7	10	62	AGVETTTPSK	K	Q	0.997	39.1	27.6	15.4	39.1	0	1	0	0	2	990.51	1147.71	172284	179	188
Mudpit_Aged_L3_4Left_IAF	IGL@ protein OS=Homo sapiens GN=IGL@ PE=1 SV=1	Q8N355	IGL	24791.9	7	10	62	FSGSNSGNTATLTISR	R	V	0.997	144	26.1	22	144	0	7	0	0	2	1612.79	3136.55	22200000	80	95
Mudpit_Aged_L3_4Left_IAF	IGL@ protein OS=Homo sapiens GN=IGL@ PE=1 SV=1	Q8N355	IGL	24791.9	7	10	62	LTVLGQPK	K	A	0.99	42.9	25	15.7	42.9	0	5	0	0	2	855.53	2219.84	233000000	125	132
Mudpit_Aged_L3_4Left_IAF	IGL@ protein OS=Homo sapiens GN=IGL@ PE=1 SV=1	Q8N355	IGL	24791.9	7	10	62	SYSCQVTHEGSTVEK	R	T	0.997	50.2	25	16.1	50.2	0	1	1	0	2	1712.74	1386.59	22900000	212	226
Mudpit_Aged_L3_4Left_IAF	IGL@ protein OS=Homo sapiens GN=IGL@ PE=1 SV=1	Q8N355	IGL	24791.9	7	10	62	YAASSYLSLTPEQWK	K	S	0.997	97.9	27.1	19.1	97.9	0	6	3	0	2	1743.86	6986.27	281000000	194	208
Mudpit_Aged_L3_4Left_IAF	Complement component C8 gamma chain OS=Homo sapiens GN=C8G PE=1 SV=3	P07360	C8G	22277.3	5	9	24	AEATTLHVAPQGTAMAVSTFR	R	K	0.997	72.9	27.9	17.6	72.9	0	2	3	0	2	2175.09	4479.97	139000000	70	90
Mudpit_Aged_L3_4Left_IAF	Complement component C8 gamma chain OS=Homo sapiens GN=C8G PE=1 SV=3	P07360	C8G	22277.3	5	9	24	QLYGDTGVLGR	R	F	0.997	65.8	28.1	17.1	65.8	0	2	0	0	2	1178.62	4131.34	31000000	101	111
Mudpit_Aged_L3_4Left_IAF	Complement component C8 gamma chain OS=Homo sapiens GN=C8G PE=1 SV=3	P07360	C8G	22277.3	5	9	24	RPASPISTIQPK	R	A	0.97	32.5	25	15	32.5	0	0	1	0	2	1294.75	1593.45	3879310	28	39
Mudpit_Aged_L3_4Left_IAF	Complement component C8 gamma chain OS=Homo sapiens GN=C8G PE=1 SV=3	P07360	C8G	22277.3	5	9	24	SLPVSDSVLSGFEQR	R	V	0.997	87	27.7	18.4	87	0	5	1	0	2	1620.82	6865.53	39100000	154	168
Mudpit_Aged_L3_4Left_IAF	Complement component C8 gamma chain OS=Homo sapiens GN=C8G PE=1 SV=3	P07360	C8G	22277.3	5	9	24	VQEAHLTEDQIFYFPK	R	Y	0.997	105	25.9	19.6	105	0	6	4	0	2	1964.98	6301.03	56500000	169	184
Mudpit_Aged_L3_4Left_IAF	cDNA, FLJ93141, highly similar to Homo sapiens coagulation factor XIII, A1 polypeptide (F13A1), mRNA OS=Homo sapiens PE=2 SV=1	B2R6V9		83241.2	13	17	31	AVPPNNSNAAEDDLPTVELQGVVPR	R	G	0.997	89.6	26.7	18.6	89.6	0	2	2	0	2	2602.31	7273	17100000	14	38
Mudpit_Aged_L3_4Left_IAF	cDNA, FLJ93141, highly similar to Homo sapiens coagulation factor XIII, A1 polypeptide (F13A1), mRNA OS=Homo sapiens PE=2 SV=1	B2R6V9		83241.2	13	17	31	DGTHVVENVDATHIGK	K	L	0.977	50.3	25.8	16.1	50.3	0	0	0	1	2	1691.83	2058.19	16500000	448	463
Mudpit_Aged_L3_4Left_IAF	cDNA, FLJ93141, highly similar to Homo sapiens coagulation factor XIII, A1 polypeptide (F13A1), mRNA OS=Homo sapiens PE=2 SV=1	B2R6V9		83241.2	13	17	31	GTQVVGSDMTVTVEFTNPLK	R	E	0.997	79.9	25.9	18	79.9	0	1	2	0	2	2139.06	6794.84	9201540	639	658
Mudpit_Aged_L3_4Left_IAF	cDNA, FLJ93141, highly similar to Homo sapiens coagulation factor XIII, A1 polypeptide (F13A1), mRNA OS=Homo sapiens PE=2 SV=1	B2R6V9		83241.2	13	17	31	GTYIPVPIVSELQSGK	K	W	0.997	60.1	25.9	16.8	60.1	0	3	1	0	2	1687.93	7822.08	32500000	115	130
Mudpit_Aged_L3_4Left_IAF	cDNA, FLJ93141, highly similar to Homo sapiens coagulation factor XIII, A1 polypeptide (F13A1), mRNA OS=Homo sapiens PE=2 SV=1	B2R6V9		83241.2	13	17	31	HVYGELDVQIQR	R	R	0.997	54.8	26	21.7	49.6	0	0	2	0	2	1456.75	3886.01	9144900	717	728
Mudpit_Aged_L3_4Left_IAF	cDNA, FLJ93141, highly similar to Homo sapiens coagulation factor XIII, A1 polypeptide (F13A1), mRNA OS=Homo sapiens PE=2 SV=1	B2R6V9		83241.2	13	17	31	IVTNYFSAHDNDANLQMDIFLEEDGNVNSK	R	L	0.997	73.5	25	17.6	73.5	0	0	2	0	2	3429.55	7341.95	2150300	335	364
Mudpit_Aged_L3_4Left_IAF	cDNA, FLJ93141, highly similar to Homo sapiens coagulation factor XIII, A1 polypeptide (F13A1), mRNA OS=Homo sapiens PE=2 SV=1	B2R6V9		83241.2	13	17	31	KDGTHVVENVDATHIGK	K	L	0.99	60.8	26.8	16.8	60.8	0	0	0	2	2	1819.93	1234.79	19200000	447	463
Mudpit_Aged_L3_4Left_IAF	cDNA, FLJ93141, highly similar to Homo sapiens coagulation factor XIII, A1 polypeptide (F13A1), mRNA OS=Homo sapiens PE=2 SV=1	B2R6V9		83241.2	13	17	31	KETFDVTLEPLSFK	K	K	0.989	44.6	25.9	15.8	44.6	0	0	1	0	2	1653.87	6761.15	5170820	571	584
Mudpit_Aged_L3_4Left_IAF	cDNA, FLJ93141, highly similar to Homo sapiens coagulation factor XIII, A1 polypeptide (F13A1), mRNA OS=Homo sapiens PE=2 SV=1	B2R6V9		83241.2	13	17	31	LALETALMYGAK	R	K	0.997	75.1	25.6	17.7	75.1	0	5	0	0	2	1280.69	6463.21	41200000	493	504
Mudpit_Aged_L3_4Left_IAF	cDNA, FLJ93141, highly similar to Homo sapiens coagulation factor XIII, A1 polypeptide (F13A1), mRNA OS=Homo sapiens PE=2 SV=1	B2R6V9		83241.2	13	17	31	LIASMSSDSLR	K	H	0.997	78.1	26.4	17.9	78.1	0	3	0	0	2	1179.6	3744.96	21000000	706	716
Mudpit_Aged_L3_4Left_IAF	cDNA, FLJ93141, highly similar to Homo sapiens coagulation factor XIII, A1 polypeptide (F13A1), mRNA OS=Homo sapiens PE=2 SV=1	B2R6V9		83241.2	13	17	31	QIGGDGMMDITDTYK	K	F	0.997	81.2	25	18.1	81.2	0	1	0	0	2	1644.72	5954.51	17000000	469	483
Mudpit_Aged_L3_4Left_IAF	cDNA, FLJ93141, highly similar to Homo sapiens coagulation factor XIII, A1 polypeptide (F13A1), mRNA OS=Homo sapiens PE=2 SV=1	B2R6V9		83241.2	13	17	31	SNVDMDFEVENAVLGK	R	D	0.997	77.8	25	17.9	77.8	0	1	0	0	2	1782.82	6401.05	2700680	517	532
Mudpit_Aged_L3_4Left_IAF	cDNA, FLJ93141, highly similar to Homo sapiens coagulation factor XIII, A1 polypeptide (F13A1), mRNA OS=Homo sapiens PE=2 SV=1	B2R6V9		83241.2	13	17	31	STVLTIPEIIIK	K	V	0.994	31.4	25	15	31.4	0	2	0	0	2	1326.82	8043.98	17700000	625	636
Mudpit_Aged_L3_4Left_IAF	Amyloid lambda 6 light chain variable region SAR (Fragment) OS=Homo sapiens PE=2 SV=1	Q96JD0		12294.6	2	4	5	FSGSIDSSSNSASLTISGLK	R	T	0.997	142	26.6	21.8	142	0	2	0	0	2	1957.97	5921.63	8489620	63	82
Mudpit_Aged_L3_4Left_IAF	Amyloid lambda 6 light chain variable region SAR (Fragment) OS=Homo sapiens PE=2 SV=1	Q96JD0		12294.6	2	4	5	NFMLTQPHSVSESPGK	-	T	0.997	50.7	25	16.2	50.7	0	1	2	0	2	1774.84	3291.03	13500000	1	16
Mudpit_Aged_L3_4Left_IAF	cDNA FLJ55311, highly similar to Complement component C8 beta chain OS=Homo sapiens PE=2 SV=1	B7Z555,B7ZA94,F5H7G1,P07358	C8B	67046.9	11	18	30	DTMVEDLVVLVR	R	G	0.997	69.6	27.6	17.3	69.6	0	3	0	0	2	1388.75	7870.58	45500000	417	428
Mudpit_Aged_L3_4Left_IAF	cDNA FLJ55311, highly similar to Complement component C8 beta chain OS=Homo sapiens PE=2 SV=1	B7Z555,B7ZA94,F5H7G1,P07358	C8B	67046.9	11	18	30	EYESYSDFER	K	N	0.997	37.9	25	15.4	37.9	0	3	0	0	2	1324.53	3757.06	18700000	233	242
Mudpit_Aged_L3_4Left_IAF	cDNA FLJ55311, highly similar to Complement component C8 beta chain OS=Homo sapiens PE=2 SV=1	B7Z555,B7ZA94,F5H7G1,P07358	C8B	67046.9	11	18	30	GGASEHITTLAYQELPTADLMQEWGDAVQYNPAIIK	R	V	0.997	117	25	20.3	117	0	0	3	1	2	3946.92	8914.22	28000000	429	464
Mudpit_Aged_L3_4Left_IAF	cDNA FLJ55311, highly similar to Complement component C8 beta chain OS=Homo sapiens PE=2 SV=1	B7Z555,B7ZA94,F5H7G1,P07358	C8B	67046.9	11	18	30	GILNEIKDR	R	N	0.997	45.8	26.8	15.9	45.8	0	1	1	0	2	1057.6	2524.6	21000000	405	413
Mudpit_Aged_L3_4Left_IAF	cDNA FLJ55311, highly similar to Complement component C8 beta chain OS=Homo sapiens PE=2 SV=1	B7Z555,B7ZA94,F5H7G1,P07358	C8B	67046.9	11	18	30	IPGIFELGISSQSDR	K	G	0.997	71.9	29.8	17.5	71.9	0	4	0	0	2	1618.84	7673.17	24700000	260	274
Mudpit_Aged_L3_4Left_IAF	cDNA FLJ55311, highly similar to Complement component C8 beta chain OS=Homo sapiens PE=2 SV=1	B7Z555,B7ZA94,F5H7G1,P07358	C8B	67046.9	11	18	30	KPYNVESYTPQTQGK	R	Y	0.991	45.4	26.3	15.8	45.4	0	0	1	0	2	1739.86	1715.15	5381230	212	226
Mudpit_Aged_L3_4Left_IAF	cDNA FLJ55311, highly similar to Complement component C8 beta chain OS=Homo sapiens PE=2 SV=1	B7Z555,B7ZA94,F5H7G1,P07358	C8B	67046.9	11	18	30	LPLEYSYGEYR	R	D	0.997	47.7	26.5	16	47.7	0	2	0	0	2	1389.67	5264.73	16200000	324	334
Mudpit_Aged_L3_4Left_IAF	cDNA FLJ55311, highly similar to Complement component C8 beta chain OS=Homo sapiens PE=2 SV=1	B7Z555,B7ZA94,F5H7G1,P07358	C8B	67046.9	11	18	30	RDTMVEDLVVLVR	K	G	0.997	57.3	25.7	16.6	57.3	0	0	2	0	2	1560.84	6641.98	12700000	416	428
Mudpit_Aged_L3_4Left_IAF	cDNA FLJ55311, highly similar to Complement component C8 beta chain OS=Homo sapiens PE=2 SV=1	B7Z555,B7ZA94,F5H7G1,P07358	C8B	67046.9	11	18	30	SGFSFGFK	K	I	0.99	55.1	25	19	52.6	0	2	0	0	2	876.425	5436.35	15400000	252	259
Mudpit_Aged_L3_4Left_IAF	cDNA FLJ55311, highly similar to Complement component C8 beta chain OS=Homo sapiens PE=2 SV=1	B7Z555,B7ZA94,F5H7G1,P07358	C8B	67046.9	11	18	30	SLMLHYEFLQR	R	V	0.98	34.2	27.2	15.1	34.2	0	1	2	0	2	1436.74	5790	32100000	310	320
Mudpit_Aged_L3_4Left_IAF	cDNA FLJ55311, highly similar to Complement component C8 beta chain OS=Homo sapiens PE=2 SV=1	B7Z555,B7ZA94,F5H7G1,P07358	C8B	67046.9	11	18	30	VEPLYELVTATDFAYSSTVR	K	Q	0.997	93.9	38	18.9	93.9	0	2	2	0	2	2261.13	9094.72	357000000	467	486
Mudpit_Aged_L3_4Left_IAF	Complement component C8 alpha chain OS=Homo sapiens GN=C8A PE=1 SV=2	P07357	C8A	65163.8	4	8	15	AMAVEDIISR	K	V	0.997	58.3	27.8	16.6	58.3	0	3	0	0	2	1104.57	3566.89	36300000	413	422
Mudpit_Aged_L3_4Left_IAF	Complement component C8 alpha chain OS=Homo sapiens GN=C8A PE=1 SV=2	P07357	C8A	65163.8	4	8	15	MESLGITSR	K	D	0.997	58.5	27.8	16.7	58.5	0	2	0	0	2	993.503	2615.65	17100000	362	370
Mudpit_Aged_L3_4Left_IAF	Complement component C8 alpha chain OS=Homo sapiens GN=C8A PE=1 SV=2	P07357	C8A	65163.8	4	8	15	YHFEALADTGISSEFYDNANDLLSK	K	V	0.997	98.3	25	19.1	98.3	0	0	2	0	2	2820.3	8655.88	12600000	215	239
Mudpit_Aged_L3_4Left_IAF	Complement component C8 alpha chain OS=Homo sapiens GN=C8A PE=1 SV=2	P07357	C8A	65163.8	4	8	15	YNPVVIDFEMQPIHEVLR	K	H	0.997	94.8	26.9	18.9	94.8	0	3	5	0	2	2215.12	7695.75	71600000	452	469
Mudpit_Aged_L3_4Left_IAF	Cytokine receptor-like factor 1 OS=Homo sapiens GN=CRLF1 PE=1 SV=1	O75462	CRLF1	46302.2	2	3	4	DLALFTPYEIWVEATNR	K	L	0.997	93.7	25.7	18.9	93.7	0	1	1	0	2	2038.03	9321.48	5070370	200	216
Mudpit_Aged_L3_4Left_IAF	Cytokine receptor-like factor 1 OS=Homo sapiens GN=CRLF1 PE=1 SV=1	O75462	CRLF1	46302.2	2	3	4	VGGLEDQLSVR	R	W	0.997	75.8	26.2	17.7	75.8	0	2	0	0	2	1172.63	4002.26	21500000	246	256
Mudpit_Aged_L3_4Left_IAF	Lysyl oxidase homolog 4 OS=Homo sapiens GN=LOXL4 PE=1 SV=1	Q96JB6	LOXL4	84480.6	2	2	2	FSTQIYNLGR	R	T	0.997	38.5	25.9	15.4	38.5	0	1	0	0	2	1198.62	5013.55	5061930	584	593
Mudpit_Aged_L3_4Left_IAF	Lysyl oxidase homolog 4 OS=Homo sapiens GN=LOXL4 PE=1 SV=1	Q96JB6	LOXL4	84480.6	2	2	2	YGQGEGPIWLDNVR	K	C	0.997	80	25.7	18	80	0	1	0	0	2	1603.79	6221.19	4248540	88	101
Mudpit_Aged_L3_4Left_IAF	Collagen alpha-1(XII) chain OS=Homo sapiens GN=COL12A1 PE=1 SV=1	D6RGG3,Q99715	COL12A1	333145	44	61	85	DEGVELFAIGIK	K	N	0.997	63	26.5	16.9	63	0	1	0	0	2	1290.69	8253.73	13800000	1325	1336
Mudpit_Aged_L3_4Left_IAF	Collagen alpha-1(XII) chain OS=Homo sapiens GN=COL12A1 PE=1 SV=1	D6RGG3,Q99715	COL12A1	333145	44	61	85	DITDTSIGAYWTSAPGMVR	K	G	0.997	70.3	25.1	17.4	70.3	0	2	0	0	2	2040.97	8585.46	4225340	915	933
Mudpit_Aged_L3_4Left_IAF	Collagen alpha-1(XII) chain OS=Homo sapiens GN=COL12A1 PE=1 SV=1	D6RGG3,Q99715	COL12A1	333145	44	61	85	DLKPETEYVVNVYSVVEDEYSEPLKGTEK	K	T	0.954	34.2	25	15.1	34.2	0	0	0	1	2	3359.64	8524.84	5811180	1443	1471
Mudpit_Aged_L3_4Left_IAF	Collagen alpha-1(XII) chain OS=Homo sapiens GN=COL12A1 PE=1 SV=1	D6RGG3,Q99715	COL12A1	333145	44	61	85	DLSFSEVTSYGFK	K	T	0.997	56.2	26.3	16.5	56.2	0	1	0	0	2	1479.7	7760.78	12800000	637	649
Mudpit_Aged_L3_4Left_IAF	Collagen alpha-1(XII) chain OS=Homo sapiens GN=COL12A1 PE=1 SV=1	D6RGG3,Q99715	COL12A1	333145	44	61	85	DPHTEFTLK	R	K	0.976	37.3	25	15.3	37.3	0	0	1	0	2	1087.54	2234.93	5745490	487	495
Mudpit_Aged_L3_4Left_IAF	Collagen alpha-1(XII) chain OS=Homo sapiens GN=COL12A1 PE=1 SV=1	D6RGG3,Q99715	COL12A1	333145	44	61	85	GEVQTVTFDTEEVK	R	T	0.997	76	25.9	17.7	76	0	1	0	0	2	1581.76	4565.22	4451070	2628	2641
Mudpit_Aged_L3_4Left_IAF	Collagen alpha-1(XII) chain OS=Homo sapiens GN=COL12A1 PE=1 SV=1	D6RGG3,Q99715	COL12A1	333145	44	61	85	GGNTMTGDAIDYLVK	K	N	0.997	65.4	25.6	17.1	65.4	0	2	0	0	2	1554.75	6346.73	9282300	214	228
Mudpit_Aged_L3_4Left_IAF	Collagen alpha-1(XII) chain OS=Homo sapiens GN=COL12A1 PE=1 SV=1	D6RGG3,Q99715	COL12A1	333145	44	61	85	GMTSSEPISIMEK	K	T	0.997	59	25	16.7	59	0	2	0	0	2	1409.67	4201.86	6728830	409	421
Mudpit_Aged_L3_4Left_IAF	Collagen alpha-1(XII) chain OS=Homo sapiens GN=COL12A1 PE=1 SV=1	D6RGG3,Q99715	COL12A1	333145	44	61	85	GTWDHGASDVSLYR	R	I	0.997	68.8	30.5	17.3	68.8	0	1	2	0	2	1563.72	3988.34	43600000	1673	1686
Mudpit_Aged_L3_4Left_IAF	Collagen alpha-1(XII) chain OS=Homo sapiens GN=COL12A1 PE=1 SV=1	D6RGG3,Q99715	COL12A1	333145	44	61	85	HVFIVDDFESFEK	R	I	0.997	66.6	25.1	17.2	66.6	0	2	2	0	2	1611.77	6654.85	68100000	2479	2491
Mudpit_Aged_L3_4Left_IAF	Collagen alpha-1(XII) chain OS=Homo sapiens GN=COL12A1 PE=1 SV=1	D6RGG3,Q99715	COL12A1	333145	44	61	85	IGVLITDGK	K	S	0.997	60.3	27.4	54.2	22.8	0	1	0	0	2	915.551	3524.28	21600000	1303	1311
Mudpit_Aged_L3_4Left_IAF	Collagen alpha-1(XII) chain OS=Homo sapiens GN=COL12A1 PE=1 SV=1	D6RGG3,Q99715	COL12A1	333145	44	61	85	IIYSPTVGDPIDEYTTVPGR	R	R	0.997	142	27.3	21.9	142	0	1	1	0	2	2193.11	7303.16	46800000	2057	2076
Mudpit_Aged_L3_4Left_IAF	Collagen alpha-1(XII) chain OS=Homo sapiens GN=COL12A1 PE=1 SV=1	D6RGG3,Q99715	COL12A1	333145	44	61	85	ISVFATYSSGEGEPLTGDATTELSQDSK	R	T	0.997	129	25.4	21.1	129	0	2	3	0	2	2890.35	7372.14	13500000	973	1000
Mudpit_Aged_L3_4Left_IAF	Collagen alpha-1(XII) chain OS=Homo sapiens GN=COL12A1 PE=1 SV=1	D6RGG3,Q99715	COL12A1	333145	44	61	85	ITEVTSEGFR	K	G	0.997	56.5	29.7	16.5	56.5	0	2	0	0	2	1138.57	2721.7	15800000	1663	1672
Mudpit_Aged_L3_4Left_IAF	Collagen alpha-1(XII) chain OS=Homo sapiens GN=COL12A1 PE=1 SV=1	D6RGG3,Q99715	COL12A1	333145	44	61	85	ITVIAVYEDGDGGHLTGNGR	K	T	0.997	53.8	26.9	16.4	53.8	0	0	1	0	2	2044.01	5121.44	8092590	2093	2112
Mudpit_Aged_L3_4Left_IAF	Collagen alpha-1(XII) chain OS=Homo sapiens GN=COL12A1 PE=1 SV=1	D6RGG3,Q99715	COL12A1	333145	44	61	85	ITYQPSTGEGNEQTTTIGGR	R	Q	0.997	113	25.8	20.1	113	0	1	0	0	2	2110.01	3243.26	3156560	1785	1804
Mudpit_Aged_L3_4Left_IAF	Collagen alpha-1(XII) chain OS=Homo sapiens GN=COL12A1 PE=1 SV=1	D6RGG3,Q99715	COL12A1	333145	44	61	85	IVDDLTINLCNSVK	R	G	0.997	83.4	26.7	18.2	83.4	0	1	0	0	2	1604.82	6680.24	5676030	1367	1380
Mudpit_Aged_L3_4Left_IAF	Collagen alpha-1(XII) chain OS=Homo sapiens GN=COL12A1 PE=1 SV=1	D6RGG3,Q99715	COL12A1	333145	44	61	85	IVEVFDIGPK	R	R	0.997	36.2	26.2	26.9	24.6	0	1	0	0	2	1116.63	6181.61	5931410	1225	1234
Mudpit_Aged_L3_4Left_IAF	Collagen alpha-1(XII) chain OS=Homo sapiens GN=COL12A1 PE=1 SV=1	D6RGG3,Q99715	COL12A1	333145	44	61	85	LGELVVGPYDNTVVLEELR	R	A	0.997	100	25.6	19.3	100	0	1	1	0	2	2115.13	8917.29	165000000	1130	1148
Mudpit_Aged_L3_4Left_IAF	Collagen alpha-1(XII) chain OS=Homo sapiens GN=COL12A1 PE=1 SV=1	D6RGG3,Q99715	COL12A1	333145	44	61	85	LKPDTPYTITVSSLYPDGEGGR	K	M	0.997	60	26.4	16.8	60	0	0	3	0	2	2366.19	6330.66	23400000	1813	1834
Mudpit_Aged_L3_4Left_IAF	Collagen alpha-1(XII) chain OS=Homo sapiens GN=COL12A1 PE=1 SV=1	D6RGG3,Q99715	COL12A1	333145	44	61	85	LLPETPSDPFAIWQITDR	R	D	0.997	85.3	26.8	18.3	85.3	0	1	1	0	2	2099.08	9054.23	18100000	2585	2602
Mudpit_Aged_L3_4Left_IAF	Collagen alpha-1(XII) chain OS=Homo sapiens GN=COL12A1 PE=1 SV=1	D6RGG3,Q99715	COL12A1	333145	44	61	85	LQPQTTYDITVLPIYK	R	M	0.997	69.3	25	17.3	69.3	0	1	1	0	2	1893.04	7660.34	13100000	1055	1070
Mudpit_Aged_L3_4Left_IAF	Collagen alpha-1(XII) chain OS=Homo sapiens GN=COL12A1 PE=1 SV=1	D6RGG3,Q99715	COL12A1	333145	44	61	85	MIATDPDDTHAYNVADFESLSR	K	I	0.997	101	25	19.3	101	0	1	3	0	2	2468.1	6400.38	68600000	1345	1366
Mudpit_Aged_L3_4Left_IAF	Collagen alpha-1(XII) chain OS=Homo sapiens GN=COL12A1 PE=1 SV=1	D6RGG3,Q99715	COL12A1	333145	44	61	85	NFASVQGVSLESGSFPSYSAYR	K	I	0.997	113	25	20.1	113	0	1	1	0	2	2353.11	7393.69	4329610	2533	2554
Mudpit_Aged_L3_4Left_IAF	Collagen alpha-1(XII) chain OS=Homo sapiens GN=COL12A1 PE=1 SV=1	D6RGG3,Q99715	COL12A1	333145	44	61	85	NLQPDTSYTVTVVPVYTEGDGGR	R	T	0.997	105	25.9	19.6	105	0	2	1	0	2	2468.19	6913.8	55700000	1902	1924
Mudpit_Aged_L3_4Left_IAF	Collagen alpha-1(XII) chain OS=Homo sapiens GN=COL12A1 PE=1 SV=1	D6RGG3,Q99715	COL12A1	333145	44	61	85	NNVILQPLQPDTPYK	R	I	0.997	44.8	26.2	15.8	44.8	0	2	0	0	2	1739.93	5857.12	16700000	2078	2092
Mudpit_Aged_L3_4Left_IAF	Collagen alpha-1(XII) chain OS=Homo sapiens GN=COL12A1 PE=1 SV=1	D6RGG3,Q99715	COL12A1	333145	44	61	85	NSDVEIFAVGVK	R	D	0.997	46.6	26.8	15.9	46.6	0	1	0	0	2	1277.67	5823.2	9808250	566	577
Mudpit_Aged_L3_4Left_IAF	Collagen alpha-1(XII) chain OS=Homo sapiens GN=COL12A1 PE=1 SV=1	D6RGG3,Q99715	COL12A1	333145	44	61	85	NVGVEVFSLGIK	R	A	0.997	70.9	26.2	17.4	70.9	0	2	0	0	2	1261.72	7090.86	8272530	266	277
Mudpit_Aged_L3_4Left_IAF	Collagen alpha-1(XII) chain OS=Homo sapiens GN=COL12A1 PE=1 SV=1	D6RGG3,Q99715	COL12A1	333145	44	61	85	QYLVTYTPVAGGETQEVTVR	K	G	0.997	74.9	26.7	17.7	74.9	0	1	1	0	2	2211.13	6062.43	58800000	843	862
Mudpit_Aged_L3_4Left_IAF	Collagen alpha-1(XII) chain OS=Homo sapiens GN=COL12A1 PE=1 SV=1	D6RGG3,Q99715	COL12A1	333145	44	61	85	SELEAIASPPAETHVFTVEDFDAFQR	R	I	0.997	93	25	18.8	93	0	1	2	0	2	2906.38	8429.85	27400000	582	607
Mudpit_Aged_L3_4Left_IAF	Collagen alpha-1(XII) chain OS=Homo sapiens GN=COL12A1 PE=1 SV=1	D6RGG3,Q99715	COL12A1	333145	44	61	85	SLLQAVANLPYK	K	G	0.997	38.5	25	15.4	38.5	0	1	0	0	2	1316.76	7161.3	15100000	1261	1272
Mudpit_Aged_L3_4Left_IAF	Collagen alpha-1(XII) chain OS=Homo sapiens GN=COL12A1 PE=1 SV=1	D6RGG3,Q99715	COL12A1	333145	44	61	85	SQDEVEIPAR	K	E	0.997	70	25	17.4	70	0	1	0	0	2	1143.56	2278.57	10600000	253	262
Mudpit_Aged_L3_4Left_IAF	Collagen alpha-1(XII) chain OS=Homo sapiens GN=COL12A1 PE=1 SV=1	D6RGG3,Q99715	COL12A1	333145	44	61	85	TEFNLNQYYQR	R	D	0.997	56.2	26.1	16.5	56.2	0	1	0	0	2	1475.69	5252.4	17500000	190	200
Mudpit_Aged_L3_4Left_IAF	Collagen alpha-1(XII) chain OS=Homo sapiens GN=COL12A1 PE=1 SV=1	D6RGG3,Q99715	COL12A1	333145	44	61	85	TLENLIPDTK	R	Y	0.948	32.5	34.4	15	32.5	0	1	0	0	2	1143.63	5103.13	3370730	778	787
Mudpit_Aged_L3_4Left_IAF	Collagen alpha-1(XII) chain OS=Homo sapiens GN=COL12A1 PE=1 SV=1	D6RGG3,Q99715	COL12A1	333145	44	61	85	VEDIIEAINTFPYR	K	G	0.997	77.9	27.7	17.9	77.9	0	3	2	0	2	1679.86	8798.76	21300000	500	513
Mudpit_Aged_L3_4Left_IAF	Collagen alpha-1(XII) chain OS=Homo sapiens GN=COL12A1 PE=1 SV=1	D6RGG3,Q99715	COL12A1	333145	44	61	85	VEYYPVSGGK	K	R	0.997	32.6	25	15	32.6	0	1	0	0	2	1098.55	2246.69	3883680	1417	1426
Mudpit_Aged_L3_4Left_IAF	Collagen alpha-1(XII) chain OS=Homo sapiens GN=COL12A1 PE=1 SV=1	D6RGG3,Q99715	COL12A1	333145	44	61	85	VLVVVTDGR	K	S	0.997	50.9	26.6	22.5	44.6	0	2	0	0	2	957.573	3010.14	13900000	2428	2436
Mudpit_Aged_L3_4Left_IAF	Collagen alpha-1(XII) chain OS=Homo sapiens GN=COL12A1 PE=1 SV=1	D6RGG3,Q99715	COL12A1	333145	44	61	85	VQIALAQYSGDPR	R	T	0.997	63.6	27.3	17	63.6	0	1	1	0	2	1417.74	4700.18	15400000	1236	1248
Mudpit_Aged_L3_4Left_IAF	Collagen alpha-1(XII) chain OS=Homo sapiens GN=COL12A1 PE=1 SV=1	D6RGG3,Q99715	COL12A1	333145	44	61	85	VSWDPSPSPVLGYK	R	I	0.997	55.6	26.8	16.5	55.6	0	3	0	0	2	1531.78	6206.68	18900000	2134	2147
Mudpit_Aged_L3_4Left_IAF	Collagen alpha-1(XII) chain OS=Homo sapiens GN=COL12A1 PE=1 SV=1	D6RGG3,Q99715	COL12A1	333145	44	61	85	VTWEPAPGEVK	R	G	0.994	30.3	25	14.9	30.3	0	1	0	0	2	1212.63	3631.83	8145540	1105	1115
Mudpit_Aged_L3_4Left_IAF	Collagen alpha-1(XII) chain OS=Homo sapiens GN=COL12A1 PE=1 SV=1	D6RGG3,Q99715	COL12A1	333145	44	61	85	VVYSPVDGTRPSESIVVPGNTR	R	M	0.985	40.3	26.3	15.5	40.3	0	0	1	0	2	2329.21	5014.47	5116690	1966	1987
Mudpit_Aged_L3_4Left_IAF	Collagen alpha-1(XII) chain OS=Homo sapiens GN=COL12A1 PE=1 SV=1	D6RGG3,Q99715	COL12A1	333145	44	61	85	VYDPSTSTLNVR	R	W	0.997	55.9	27.9	16.5	55.9	0	1	0	0	2	1351.69	3481.11	27400000	1852	1863
Mudpit_Aged_L3_4Left_IAF	Collagen alpha-1(XII) chain OS=Homo sapiens GN=COL12A1 PE=1 SV=1	D6RGG3,Q99715	COL12A1	333145	44	61	85	WDPAPGPVLQYR	R	V	0.99	30.2	25.5	14.9	30.2	0	1	0	0	2	1398.72	5817.23	5403560	1954	1965
Mudpit_Aged_L3_4Left_IAF	Collagen alpha-1(XII) chain OS=Homo sapiens GN=COL12A1 PE=1 SV=1	D6RGG3,Q99715	COL12A1	333145	44	61	85	YEVSVIPEYFSGPGTPLTGNAATEEVR	K	G	0.997	106	25.9	19.6	106	0	2	2	0	2	2883.4	8615.53	11300000	788	814
Mudpit_Aged_L3_4Left_IAF	Unconventional myosin-Id OS=Homo sapiens GN=MYO1D PE=1 SV=1	J3QRN6,K7EIG7,O94832,Q7Z3N6	DKFZp686A01173,MYO1D	116206	3	3	3	HQVEYLGLLENVR	R	V	0.968	36.1	26.9	15.3	36.1	0	0	1	0	2	1569.84	5905.79	7150670	608	620
Mudpit_Aged_L3_4Left_IAF	Unconventional myosin-Id OS=Homo sapiens GN=MYO1D PE=1 SV=1	J3QRN6,K7EIG7,O94832,Q7Z3N6	DKFZp686A01173,MYO1D	116206	3	3	3	SFHSFYQLLQGGSEQMLR	R	S	0.99	44	27.5	15.7	44	0	0	1	0	2	2128.03	7679.42	3299400	200	217
Mudpit_Aged_L3_4Left_IAF	Unconventional myosin-Id OS=Homo sapiens GN=MYO1D PE=1 SV=1	J3QRN6,K7EIG7,O94832,Q7Z3N6	DKFZp686A01173,MYO1D	116206	3	3	3	TLFTLEELR	R	A	0.997	49.1	26.3	25.9	39.3	0	1	0	0	2	1121.62	6704.84	5132570	686	694
Mudpit_Aged_L3_4Left_IAF	Collagen alpha-1(XIV) chain OS=Homo sapiens GN=COL14A1 PE=1 SV=3	Q05707	COL14A1	193516	27	36	44	ASAHAITGPPTELITSEVTAR	K	S	0.997	75.1	26.3	17.7	75.1	0	0	1	0	2	2122.11	5574.09	12400000	347	367
Mudpit_Aged_L3_4Left_IAF	Collagen alpha-1(XIV) chain OS=Homo sapiens GN=COL14A1 PE=1 SV=3	Q05707	COL14A1	193516	27	36	44	DALVSQPTR	K	Y	0.992	31	26.6	14.9	31	0	2	0	0	2	986.527	1988.79	5969570	1267	1275
Mudpit_Aged_L3_4Left_IAF	Collagen alpha-1(XIV) chain OS=Homo sapiens GN=COL14A1 PE=1 SV=3	Q05707	COL14A1	193516	27	36	44	DEVIEAVR	K	N	0.967	26	27	25.4	15.2	0	1	0	0	2	930.489	2542.96	7248600	219	226
Mudpit_Aged_L3_4Left_IAF	Collagen alpha-1(XIV) chain OS=Homo sapiens GN=COL14A1 PE=1 SV=3	Q05707	COL14A1	193516	27	36	44	DGIDLAGFK	K	M	0.997	54.3	29.3	16.4	54.3	0	2	0	0	2	935.484	6115.12	9401340	1223	1231
Mudpit_Aged_L3_4Left_IAF	Collagen alpha-1(XIV) chain OS=Homo sapiens GN=COL14A1 PE=1 SV=3	Q05707	COL14A1	193516	27	36	44	ESGVELFAIGVK	R	N	0.997	64.6	26.4	17	64.6	0	1	0	0	2	1248.68	6828.25	12100000	284	295
Mudpit_Aged_L3_4Left_IAF	Collagen alpha-1(XIV) chain OS=Homo sapiens GN=COL14A1 PE=1 SV=3	Q05707	COL14A1	193516	27	36	44	ETLLDAIK	K	H	0.99	54.3	28	27.9	42.8	0	2	0	0	2	902.519	5639.3	11900000	1094	1101
Mudpit_Aged_L3_4Left_IAF	Collagen alpha-1(XIV) chain OS=Homo sapiens GN=COL14A1 PE=1 SV=3	Q05707	COL14A1	193516	27	36	44	GDLQSQAMVR	R	S	0.997	44.9	25	15.8	44.9	0	1	0	0	2	1104.55	1805.77	11300000	1608	1617
Mudpit_Aged_L3_4Left_IAF	Collagen alpha-1(XIV) chain OS=Homo sapiens GN=COL14A1 PE=1 SV=3	Q05707	COL14A1	193516	27	36	44	GGNTLTGLALNYIFENSFKPEAGSR	K	T	0.997	64.6	26.1	17	64.6	0	0	1	0	2	2656.34	8961.75	28700000	232	256
Mudpit_Aged_L3_4Left_IAF	Collagen alpha-1(XIV) chain OS=Homo sapiens GN=COL14A1 PE=1 SV=3	Q05707	COL14A1	193516	27	36	44	GPGGNSAPFQLQMFDIVCSTSWANTDK	R	C	0.997	73.4	25	17.6	73.4	0	1	0	0	2	2929.31	9066.64	2118580	1405	1431
Mudpit_Aged_L3_4Left_IAF	Collagen alpha-1(XIV) chain OS=Homo sapiens GN=COL14A1 PE=1 SV=3	Q05707	COL14A1	193516	27	36	44	IFASQASGFSDALTGMVK	K	T	0.997	128	26	21	128	0	2	1	0	2	1829.91	7568.33	26600000	899	916
Mudpit_Aged_L3_4Left_IAF	Collagen alpha-1(XIV) chain OS=Homo sapiens GN=COL14A1 PE=1 SV=3	Q05707	COL14A1	193516	27	36	44	IGILITDGK	K	S	0.997	81.1	26	77.6	21.6	0	1	0	0	2	929.567	4524.89	10500000	262	270
Mudpit_Aged_L3_4Left_IAF	Collagen alpha-1(XIV) chain OS=Homo sapiens GN=COL14A1 PE=1 SV=3	Q05707	COL14A1	193516	27	36	44	IGTDGTQVAMVQFTDDPR	K	T	0.997	101	25	19.3	101	0	2	3	0	2	1966.92	5199	59900000	1065	1082
Mudpit_Aged_L3_4Left_IAF	Collagen alpha-1(XIV) chain OS=Homo sapiens GN=COL14A1 PE=1 SV=3	Q05707	COL14A1	193516	27	36	44	ILPDTPQEPFALWEILNK	R	N	0.997	84.7	25.4	18.3	84.7	0	1	2	0	2	2124.14	9116.88	20400000	1294	1311
Mudpit_Aged_L3_4Left_IAF	Collagen alpha-1(XIV) chain OS=Homo sapiens GN=COL14A1 PE=1 SV=3	Q05707	COL14A1	193516	27	36	44	IVYNNADGTEINEVEVDPITTFPLK	R	G	0.997	80	26.8	18	80	0	1	2	0	2	2791.4	8631.2	16500000	567	591
Mudpit_Aged_L3_4Left_IAF	Collagen alpha-1(XIV) chain OS=Homo sapiens GN=COL14A1 PE=1 SV=3	Q05707	COL14A1	193516	27	36	44	LQEIEGPSVSIMEK	K	T	0.997	63.9	26.3	17	63.9	0	1	0	0	2	1559.8	5499.11	8485290	991	1004
Mudpit_Aged_L3_4Left_IAF	Collagen alpha-1(XIV) chain OS=Homo sapiens GN=COL14A1 PE=1 SV=3	Q05707	COL14A1	193516	27	36	44	LTWDPTSR	R	Q	0.977	29.8	28.7	14.9	29.8	0	1	0	0	2	975.49	3680.38	3841270	553	560
Mudpit_Aged_L3_4Left_IAF	Collagen alpha-1(XIV) chain OS=Homo sapiens GN=COL14A1 PE=1 SV=3	Q05707	COL14A1	193516	27	36	44	NLVVGDETTSSLR	R	V	0.989	29.6	26.9	14.8	29.6	0	1	0	0	2	1390.72	3925.27	13800000	740	752
Mudpit_Aged_L3_4Left_IAF	Collagen alpha-1(XIV) chain OS=Homo sapiens GN=COL14A1 PE=1 SV=3	Q05707	COL14A1	193516	27	36	44	NSDPLVGVILDNGGK	K	T	0.997	50.7	26.5	16.2	50.7	0	1	0	0	2	1497.79	6732.4	6021540	1312	1326
Mudpit_Aged_L3_4Left_IAF	Collagen alpha-1(XIV) chain OS=Homo sapiens GN=COL14A1 PE=1 SV=3	Q05707	COL14A1	193516	27	36	44	TLFLGVTNLQAK	K	H	0.997	59.6	25	16.7	59.6	0	1	0	0	2	1304.76	6289.95	8526290	917	928
Mudpit_Aged_L3_4Left_IAF	Collagen alpha-1(XIV) chain OS=Homo sapiens GN=COL14A1 PE=1 SV=3	Q05707	COL14A1	193516	27	36	44	TLPSSGPQNLR	K	V	0.996	32.8	25.8	15.1	32.8	0	1	0	0	2	1169.63	1813.46	8613570	826	836
Mudpit_Aged_L3_4Left_IAF	Collagen alpha-1(XIV) chain OS=Homo sapiens GN=COL14A1 PE=1 SV=3	Q05707	COL14A1	193516	27	36	44	TNQLNLQNTATK	K	A	0.997	64.1	28	17	64.1	0	1	0	0	2	1345.71	1673.94	9398110	72	83
Mudpit_Aged_L3_4Left_IAF	Collagen alpha-1(XIV) chain OS=Homo sapiens GN=COL14A1 PE=1 SV=3	Q05707	COL14A1	193516	27	36	44	VIVVITDGR	K	S	0.997	55.2	25.4	24.1	47.5	0	1	0	0	2	971.588	3634.81	4845450	1137	1145
Mudpit_Aged_L3_4Left_IAF	Collagen alpha-1(XIV) chain OS=Homo sapiens GN=COL14A1 PE=1 SV=3	Q05707	COL14A1	193516	27	36	44	VSEEWYNR	R	L	0.99	31.5	25.4	15	31.5	0	2	0	0	2	1082.49	2367.5	13300000	837	844
Mudpit_Aged_L3_4Left_IAF	Collagen alpha-1(XIV) chain OS=Homo sapiens GN=COL14A1 PE=1 SV=3	Q05707	COL14A1	193516	27	36	44	VTVTPIYTDGEGVSVSAPGK	K	T	0.997	93.9	26.7	18.9	93.9	0	2	1	0	2	1977.02	5666.19	21900000	806	825
Mudpit_Aged_L3_4Left_IAF	Collagen alpha-1(XIV) chain OS=Homo sapiens GN=COL14A1 PE=1 SV=3	Q05707	COL14A1	193516	27	36	44	VTWHPLSADEGLHK	R	L	0.991	46.2	26.1	15.9	46.2	0	0	1	1	2	1589.81	2869.23	26700000	642	655
Mudpit_Aged_L3_4Left_IAF	Collagen alpha-1(XIV) chain OS=Homo sapiens GN=COL14A1 PE=1 SV=3	Q05707	COL14A1	193516	27	36	44	VVIESLQDR	R	Q	0.997	36	27.8	15.3	36	0	1	0	0	2	1058.58	2938.25	5847490	950	958
Mudpit_Aged_L3_4Left_IAF	Collagen alpha-1(XIV) chain OS=Homo sapiens GN=COL14A1 PE=1 SV=3	Q05707	COL14A1	193516	27	36	44	YLHPEGLPSDYTISFLFR	R	I	0.997	57.2	28.2	16.6	57.2	0	0	1	0	2	2155.09	8791.22	10400000	1276	1293
Mudpit_Aged_L3_4Left_IAF	UDP-GlcNAc:betaGal beta-1,3-N-acetylglucosaminyltransferase 7 OS=Homo sapiens GN=B3GNT7 PE=2 SV=1	Q8NFL0	B3GNT7	45988	3	3	3	ASYPPYAGGGGFLMAGSLAR	K	R	0.997	69.3	26.1	17.3	69.3	0	1	0	0	2	1942.95	7418.4	3484660	292	311
Mudpit_Aged_L3_4Left_IAF	UDP-GlcNAc:betaGal beta-1,3-N-acetylglucosaminyltransferase 7 OS=Homo sapiens GN=B3GNT7 PE=2 SV=1	Q8NFL0	B3GNT7	45988	3	3	3	THYQQLLAYEDR	R	L	0.997	46	25.9	15.9	46	0	1	0	0	2	1536.74	3398.21	8220970	187	198
Mudpit_Aged_L3_4Left_IAF	UDP-GlcNAc:betaGal beta-1,3-N-acetylglucosaminyltransferase 7 OS=Homo sapiens GN=B3GNT7 PE=2 SV=1	Q8NFL0	B3GNT7	45988	3	3	3	TLFLLGTASK	R	Q	0.994	31.5	25	15	31.5	0	1	0	0	2	1050.62	5883.45	7510080	173	182
Mudpit_Aged_L3_4Left_IAF	Lysyl oxidase OS=Homo sapiens GN=LOX PE=4 SV=1	D0PNI2,P28300,Q96PQ9	LOX	46944.2	2	4	4	NQGTSDFLPSRPR	K	Y	0.997	39.7	26.5	15.5	39.7	0	1	1	0	2	1474.74	2161.78	14600000	271	283
Mudpit_Aged_L3_4Left_IAF	Lysyl oxidase OS=Homo sapiens GN=LOX PE=4 SV=1	D0PNI2,P28300,Q96PQ9	LOX	46944.2	2	4	4	VSVNPSYLVPESDYTNNVVR	K	C	0.997	65.7	26.8	17.1	65.7	0	1	1	0	2	2252.12	6754.53	33200000	378	397
Mudpit_Aged_L3_4Left_IAF	Vitamin D binding protein (Fragment) OS=Homo sapiens GN=Gc PE=4 SV=1	A0A1B1CYC5_HUMAN		0	2	2	4	AKLPEATPTELAK	?	?	0.997	33.6	25.1	15.1	0	0	1	0	0	2	1368.77	2325.14	5094710	0	0
Mudpit_Aged_L3_4Left_IAF	Vitamin D binding protein (Fragment) OS=Homo sapiens GN=Gc PE=4 SV=1	A0A1B1CYC5_HUMAN		0	2	2	4	LPEATPTELAK	?	?	0.997	52.5	25.8	16.3	0	0	3	0	0	2	1169.64	3163.06	25900000	0	0
Mudpit_Aged_L3_4Left_IAF	cDNA, FLJ93532, highly similar to Homo sapiens osteomodulin (OMD), mRNA OS=Homo sapiens PE=2 SV=1	B2R7N9,Q99983	OMD	49494.1	5	5	8	IDYGVFAK	K	L	0.99	42.6	25	16.9	41.4	0	3	0	0	2	912.483	4508.21	23000000	132	139
Mudpit_Aged_L3_4Left_IAF	cDNA, FLJ93532, highly similar to Homo sapiens osteomodulin (OMD), mRNA OS=Homo sapiens PE=2 SV=1	B2R7N9,Q99983	OMD	49494.1	5	5	8	LLLGYNEISK	R	L	0.997	45	25.6	36.9	23.9	0	2	0	0	2	1149.65	5108.36	41900000	167	176
Mudpit_Aged_L3_4Left_IAF	cDNA, FLJ93532, highly similar to Homo sapiens osteomodulin (OMD), mRNA OS=Homo sapiens PE=2 SV=1	B2R7N9,Q99983	OMD	49494.1	5	5	8	LPNLLQLHLEHNNLEEFPFPLPK	K	S	0.994	56.2	25	16.5	56.2	0	0	0	1	2	2752.48	8888.63	27000000	140	162
Mudpit_Aged_L3_4Left_IAF	cDNA, FLJ93532, highly similar to Homo sapiens osteomodulin (OMD), mRNA OS=Homo sapiens PE=2 SV=1	B2R7N9,Q99983	OMD	49494.1	5	5	8	LQDIPYNIFNLPNIVELSVGHNK	K	L	0.997	63.7	25.8	17	63.7	0	0	1	0	2	2637.4	9065.93	37700000	269	291
Mudpit_Aged_L3_4Left_IAF	cDNA, FLJ93532, highly similar to Homo sapiens osteomodulin (OMD), mRNA OS=Homo sapiens PE=2 SV=1	B2R7N9,Q99983	OMD	49494.1	5	5	8	NLEHLYLQNNEIEK	R	M	0.997	68.7	26.1	17.3	68.7	0	1	0	0	2	1756.89	4187.21	12300000	301	314
Mudpit_Aged_L3_4Left_IAF	Collagen alpha-1(III) chain OS=Homo sapiens GN=COL3A1 PE=1 SV=4	P02461	COL3A1	138565	7	11	19	GEPGGPGADGVPGK	K	D	0.997	41.3	26.6	15.6	41.3	0	1	0	0	2	1194.58	1302.07	13500000	744	757
Mudpit_Aged_L3_4Left_IAF	Collagen alpha-1(III) chain OS=Homo sapiens GN=COL3A1 PE=1 SV=4	P02461	COL3A1	138565	7	11	19	INTDEIMTSLK	K	S	0.997	61	27	16.8	61	0	3	0	0	2	1264.65	5521.06	28000000	1229	1239
Mudpit_Aged_L3_4Left_IAF	Collagen alpha-1(III) chain OS=Homo sapiens GN=COL3A1 PE=1 SV=4	P02461	COL3A1	138565	7	11	19	LMGSNEGEFK	K	A	0.996	32	25	15	32	0	1	0	0	2	1111.51	2072.97	10800000	1392	1401
Mudpit_Aged_L3_4Left_IAF	Collagen alpha-1(III) chain OS=Homo sapiens GN=COL3A1 PE=1 SV=4	P02461	COL3A1	138565	7	11	19	NGETGPQGPPGPTGPGGDK	K	G	0.997	103	25	19.4	103	0	2	1	0	2	1719.79	1450.09	16200000	611	629
Mudpit_Aged_L3_4Left_IAF	Collagen alpha-1(III) chain OS=Homo sapiens GN=COL3A1 PE=1 SV=4	P02461	COL3A1	138565	7	11	19	NSIAYMDQASGNVK	K	K	0.997	63.7	25	17	63.7	0	6	0	0	2	1513.7	3022.39	27600000	1374	1387
Mudpit_Aged_L3_4Left_IAF	Collagen alpha-1(III) chain OS=Homo sapiens GN=COL3A1 PE=1 SV=4	P02461	COL3A1	138565	7	11	19	SGEYWVDPNQGCK	K	L	0.997	36.8	25	15.3	36.8	0	1	0	0	2	1540.64	4067.7	1844380	1274	1286
Mudpit_Aged_L3_4Left_IAF	Collagen alpha-1(III) chain OS=Homo sapiens GN=COL3A1 PE=1 SV=4	P02461	COL3A1	138565	7	11	19	SVNGQIESLISPDGSR	K	K	0.997	109	26.7	19.8	109	0	2	2	0	2	1658.83	6003.08	18400000	1240	1255
Mudpit_Aged_L3_4Left_IAF	Carboxypeptidase B2 OS=Homo sapiens GN=CPB2 PE=1 SV=2	Q96IY4	CPB2	48424.7	8	11	14	DHEELSLVASEAVR	K	A	0.997	48.9	27	16.1	48.9	0	1	2	0	2	1554.78	4887.71	29900000	329	342
Mudpit_Aged_L3_4Left_IAF	Carboxypeptidase B2 OS=Homo sapiens GN=CPB2 PE=1 SV=2	Q96IY4	CPB2	48424.7	8	11	14	DTGTYGFLLPER	R	Y	0.997	70.1	35.3	17.4	70.1	0	2	0	0	2	1368.68	7135.99	10500000	388	399
Mudpit_Aged_L3_4Left_IAF	Carboxypeptidase B2 OS=Homo sapiens GN=CPB2 PE=1 SV=2	Q96IY4	CPB2	48424.7	8	11	14	IHIGSSFEK	K	Y	0.997	45.8	28.6	23.8	37.8	0	1	0	0	2	1017.54	1593.35	6188260	147	155
Mudpit_Aged_L3_4Left_IAF	Carboxypeptidase B2 OS=Homo sapiens GN=CPB2 PE=1 SV=2	Q96IY4	CPB2	48424.7	8	11	14	LVDFYVMPVVNVDGYDYSWK	R	K	0.997	79.5	25.7	18	79.5	0	3	0	0	2	2425.14	8978.18	9684720	214	233
Mudpit_Aged_L3_4Left_IAF	Carboxypeptidase B2 OS=Homo sapiens GN=CPB2 PE=1 SV=2	Q96IY4	CPB2	48424.7	8	11	14	SFYANNHCIGTDLNR	R	N	0.979	35.1	25	15.2	35.1	0	0	1	0	2	1782.79	3881.76	7152230	243	257
Mudpit_Aged_L3_4Left_IAF	Carboxypeptidase B2 OS=Homo sapiens GN=CPB2 PE=1 SV=2	Q96IY4	CPB2	48424.7	8	11	14	SKDHEELSLVASEAVR	K	A	0.995	49.8	26.9	16.1	49.8	0	0	1	0	2	1769.9	3476.94	6194830	327	342
Mudpit_Aged_L3_4Left_IAF	Carboxypeptidase B2 OS=Homo sapiens GN=CPB2 PE=1 SV=2	Q96IY4	CPB2	48424.7	8	11	14	YSFTIELR	K	D	0.99	33.4	25.5	15.1	33.4	0	1	0	0	2	1028.54	6080.6	7612740	380	387
Mudpit_Aged_L3_4Left_IAF	Carboxypeptidase B2 OS=Homo sapiens GN=CPB2 PE=1 SV=2	Q96IY4	CPB2	48424.7	8	11	14	YTHGHGSETLYLAPGGGDDWIYDLGIK	R	Y	0.989	49.5	25.3	16.1	49.5	0	0	1	1	2	2935.39	7790.48	29700000	353	379
Mudpit_Aged_L3_4Left_IAF	Glucose-6-phosphate isomerase (Fragment) OS=Homo sapiens GN=GPI PE=1 SV=1	A0A0A0MTS2,A0A1W6AYU6_HUMAN,B4DE36,K7EQ48,P06744	GPI	63148.5	5	6	8	EWFLQAAK	K	D	0.987	29.6	26.1	14.9	29.6	0	1	0	0	2	992.52	5396.19	6934740	227	234
Mudpit_Aged_L3_4Left_IAF	Glucose-6-phosphate isomerase (Fragment) OS=Homo sapiens GN=GPI PE=1 SV=1	A0A0A0MTS2,A0A1W6AYU6_HUMAN,B4DE36,K7EQ48,P06744	GPI	63148.5	5	6	8	ILLANFLAQTEALMR	K	G	0.997	72.4	25	17.5	72.4	0	1	0	0	2	1703.95	9144.08	6662570	424	438
Mudpit_Aged_L3_4Left_IAF	Glucose-6-phosphate isomerase (Fragment) OS=Homo sapiens GN=GPI PE=1 SV=1	A0A0A0MTS2,A0A1W6AYU6_HUMAN,B4DE36,K7EQ48,P06744	GPI	63148.5	5	6	8	NLVTEDVMR	K	M	0.997	36.1	26.6	15.3	36.1	0	1	0	0	2	1076.54	3895.14	11000000	58	66
Mudpit_Aged_L3_4Left_IAF	Glucose-6-phosphate isomerase (Fragment) OS=Homo sapiens GN=GPI PE=1 SV=1	A0A0A0MTS2,A0A1W6AYU6_HUMAN,B4DE36,K7EQ48,P06744	GPI	63148.5	5	6	8	TLAQLNPESSLFIIASK	K	T	0.997	83	25	18.2	83	0	3	1	0	2	1832.02	8458.98	9991730	195	211
Mudpit_Aged_L3_4Left_IAF	Glucose-6-phosphate isomerase (Fragment) OS=Homo sapiens GN=GPI PE=1 SV=1	A0A0A0MTS2,A0A1W6AYU6_HUMAN,B4DE36,K7EQ48,P06744	GPI	63148.5	5	6	8	VWYVSNIDGTHIAK	R	T	0.951	31.5	27.1	15	0	0	0	1	0	2	1602.83	5194.34	2527460	181	194
Mudpit_Aged_L3_4Left_IAF	Melanotransferrin OS=Homo sapiens GN=MFI2 PE=1 SV=2	P08582	MFI2	80213.8	7	8	12	ADTDGGLIFR	R	L	0.997	72.6	25.8	17.5	72.6	0	3	0	0	2	1064.54	4798.89	21400000	285	294
Mudpit_Aged_L3_4Left_IAF	Melanotransferrin OS=Homo sapiens GN=MFI2 PE=1 SV=2	P08582	MFI2	80213.8	7	8	12	DSSHAFTLDELR	R	G	0.997	53.8	25.7	16.4	53.8	0	1	0	0	2	1390.66	4964.81	5701860	460	471
Mudpit_Aged_L3_4Left_IAF	Melanotransferrin OS=Homo sapiens GN=MFI2 PE=1 SV=2	P08582	MFI2	80213.8	7	8	12	IQAEQVDAVTLSGEDIYTAGK	R	T	0.997	51.5	27.1	16.2	51.5	0	1	0	0	2	2208.1	6485.92	3127670	410	430
Mudpit_Aged_L3_4Left_IAF	Melanotransferrin OS=Homo sapiens GN=MFI2 PE=1 SV=2	P08582	MFI2	80213.8	7	8	12	SEDYELLCPNGAR	R	A	0.997	35.7	25	15.2	35.7	0	2	0	0	2	1524.66	5088.85	8155800	596	608
Mudpit_Aged_L3_4Left_IAF	Melanotransferrin OS=Homo sapiens GN=MFI2 PE=1 SV=2	P08582	MFI2	80213.8	7	8	12	TVGWNVPVGYLVESGR	R	L	0.997	62.9	27.4	16.9	62.9	0	2	1	0	2	1732.9	7861.19	18200000	137	152
Mudpit_Aged_L3_4Left_IAF	Melanotransferrin OS=Homo sapiens GN=MFI2 PE=1 SV=2	P08582	MFI2	80213.8	7	8	12	TYGLVPAAGEHYAPEDSSNSYYVVAVVR	K	R	0.997	69.6	26.5	17.3	69.6	0	0	1	0	2	3014.45	6984.2	10500000	431	458
Mudpit_Aged_L3_4Left_IAF	Melanotransferrin OS=Homo sapiens GN=MFI2 PE=1 SV=2	P08582	MFI2	80213.8	7	8	12	YYDYSGAFR	R	C	0.996	34.7	25	15.2	34.7	0	1	0	0	2	1141.49	4322.6	10400000	207	215
Mudpit_Aged_L3_4Left_IAF	Fibroblast growth factor-binding protein 2 OS=Homo sapiens GN=FGFBP2 PE=1 SV=1	Q9BYJ0	FGFBP2	24580.7	3	7	14	EAGPQAHMQQVTSSLK	R	G	0.997	104	26.8	19.5	104	0	2	6	0	2	1711.84	2581.07	340000000	119	134
Mudpit_Aged_L3_4Left_IAF	Fibroblast growth factor-binding protein 2 OS=Homo sapiens GN=FGFBP2 PE=1 SV=1	Q9BYJ0	FGFBP2	24580.7	3	7	14	NTDQTYWCEYR	R	G	0.982	26.6	25	14.7	26.6	0	3	0	0	2	1536.61	5467.03	34400000	65	75
Mudpit_Aged_L3_4Left_IAF	Fibroblast growth factor-binding protein 2 OS=Homo sapiens GN=FGFBP2 PE=1 SV=1	Q9BYJ0	FGFBP2	24580.7	3	7	14	QGSTGEEFHFQTGGR	K	D	0.997	117	25	20.3	117	0	1	2	0	2	1637.73	2175.17	63800000	26	40
Mudpit_Aged_L3_4Left_IAF	Collagen alpha-1(II) chain OS=Homo sapiens GN=COL2A1 PE=1 SV=3	P02458	COL2A1	141786	18	38	148	AGGAQLGVMQGPMGPMGPR	K	G	0.997	78.8	25.7	17.9	48.1	0	27	10	0	2	1811.87	4784.38	233000000	191	209
Mudpit_Aged_L3_4Left_IAF	Collagen alpha-1(II) chain OS=Homo sapiens GN=COL2A1 PE=1 SV=3	P02458	COL2A1	141786	18	38	148	ALLIQGSNDVEIR	K	A	0.997	75.3	26.9	18.9	0	0	10	0	0	2	1427.79	5385.6	751000000	1410	1422
Mudpit_Aged_L3_4Left_IAF	Collagen alpha-1(II) chain OS=Homo sapiens GN=COL2A1 PE=1 SV=3	P02458	COL2A1	141786	18	38	148	DGANGIPGPIGPPGPR	K	G	0.957	24.9	26.7	14.6	24.9	0	1	0	0	2	1471.77	5041.58	7846010	1175	1190
Mudpit_Aged_L3_4Left_IAF	Collagen alpha-1(II) chain OS=Homo sapiens GN=COL2A1 PE=1 SV=3	P02458	COL2A1	141786	18	38	148	DGETGAAGPPGPAGPAGER	K	G	0.997	96.4	25	19	96.4	0	1	0	0	2	1663.77	1984.63	8751690	635	653
Mudpit_Aged_L3_4Left_IAF	Collagen alpha-1(II) chain OS=Homo sapiens GN=COL2A1 PE=1 SV=3	P02458	COL2A1	141786	18	38	148	GEAGAQGPMGPSGPAGAR	R	G	0.997	116	25	20.2	116	0	40	12	0	2	1567.73	1468.79	5150000000	1089	1106
Mudpit_Aged_L3_4Left_IAF	Collagen alpha-1(II) chain OS=Homo sapiens GN=COL2A1 PE=1 SV=3	P02458	COL2A1	141786	18	38	148	GEPGDDGPSGAEGPPGPQGLAGQR	K	G	0.997	137	25	21.6	137	0	2	2	0	2	2203	3795.02	19700000	957	980
Mudpit_Aged_L3_4Left_IAF	Collagen alpha-1(II) chain OS=Homo sapiens GN=COL2A1 PE=1 SV=3	P02458	COL2A1	141786	18	38	148	GFPGLPGPSGEPGK	R	Q	0.983	27.6	26	14.7	27.6	0	1	0	0	2	1296.66	5022.83	7309560	993	1006
Mudpit_Aged_L3_4Left_IAF	Collagen alpha-1(II) chain OS=Homo sapiens GN=COL2A1 PE=1 SV=3	P02458	COL2A1	141786	18	38	148	GFTGLQGLPGPPGPSGDQGASGPAGPSGPR	R	G	0.949	29.5	25	14.8	29.5	0	0	1	0	2	2673.3	6412.56	3178780	1134	1163
Mudpit_Aged_L3_4Left_IAF	Collagen alpha-1(II) chain OS=Homo sapiens GN=COL2A1 PE=1 SV=3	P02458	COL2A1	141786	18	38	148	GPDPLQYMR	K	A	0.997	36.3	26.5	15.3	36.3	0	1	0	0	2	1092.51	2539.2	10800000	1232	1240
Mudpit_Aged_L3_4Left_IAF	Collagen alpha-1(II) chain OS=Homo sapiens GN=COL2A1 PE=1 SV=3	P02458	COL2A1	141786	18	38	148	GPEGAQGPR	R	G	0.997	48.2	25	58.4	5.81	0	2	0	0	2	868.427	1149.17	9291700	384	392
Mudpit_Aged_L3_4Left_IAF	Collagen alpha-1(II) chain OS=Homo sapiens GN=COL2A1 PE=1 SV=3	P02458	COL2A1	141786	18	38	148	GPPGPQGPAGEQGPR	K	G	0.997	58.8	26.6	16.7	58.8	0	2	0	0	2	1401.69	1258.67	15300000	120	134
Mudpit_Aged_L3_4Left_IAF	Collagen alpha-1(II) chain OS=Homo sapiens GN=COL2A1 PE=1 SV=3	P02458	COL2A1	141786	18	38	148	GPPGPVGPPGLTGPAGEPGR	R	E	0.997	39.4	27.5	15.5	39.4	0	1	0	0	2	1766.92	4760.76	9407290	1017	1036
Mudpit_Aged_L3_4Left_IAF	Collagen alpha-1(II) chain OS=Homo sapiens GN=COL2A1 PE=1 SV=3	P02458	COL2A1	141786	18	38	148	NSIAYLDEAAGNLK	K	K	0.997	81	27	18.1	81	0	6	1	0	2	1478.75	5762.43	69600000	1395	1408
Mudpit_Aged_L3_4Left_IAF	Collagen alpha-1(II) chain OS=Homo sapiens GN=COL2A1 PE=1 SV=3	P02458	COL2A1	141786	18	38	148	NSIAYLDEAAGNLKK	K	A	0.997	71.7	27.6	17.5	71.7	0	3	4	0	2	1606.84	4657.75	134000000	1395	1409
Mudpit_Aged_L3_4Left_IAF	Collagen alpha-1(II) chain OS=Homo sapiens GN=COL2A1 PE=1 SV=3	P02458	COL2A1	141786	18	38	148	QGDRGEAGAQGPMGPSGPAGAR	K	G	0.997	93.8	25	20.8	91.9	0	3	5	1	2	2023.94	1276.7	931000000	1085	1106
Mudpit_Aged_L3_4Left_IAF	Collagen alpha-1(II) chain OS=Homo sapiens GN=COL2A1 PE=1 SV=3	P02458	COL2A1	141786	18	38	148	SGDYWIDPNQGCTLDAMK	K	V	0.997	70.7	25	17.4	70.7	0	4	4	0	2	2071.87	6616.71	60500000	1295	1312
Mudpit_Aged_L3_4Left_IAF	Collagen alpha-1(II) chain OS=Homo sapiens GN=COL2A1 PE=1 SV=3	P02458	COL2A1	141786	18	38	148	SLNNQIESIR	K	S	0.997	49.4	26.9	16.1	49.4	0	3	0	0	2	1173.62	2925.79	34400000	1261	1270
Mudpit_Aged_L3_4Left_IAF	Collagen alpha-1(II) chain OS=Homo sapiens GN=COL2A1 PE=1 SV=3	P02458	COL2A1	141786	18	38	148	TGPAGAAGAR	R	G	0.997	47.6	25	16	47.6	0	1	0	0	2	828.432	1146.7	1262890	335	344
Mudpit_Aged_L3_4Left_IAF	Collagen alpha-1(I) chain OS=Homo sapiens GN=COL1A1 PE=1 SV=5	P02452	COL1A1	138941	10	16	43	DGEAGAQGPPGPAGPAGER	K	G	0.997	109	25	19.8	109	0	8	3	0	2	1690.78	1855.31	116000000	613	631
Mudpit_Aged_L3_4Left_IAF	Collagen alpha-1(I) chain OS=Homo sapiens GN=COL1A1 PE=1 SV=5	P02452	COL1A1	138941	10	16	43	GDAGPAGPK	K	G	0.977	25.1	25	14.6	25.1	0	1	0	0	2	769.384	1147.91	125148	278	286
Mudpit_Aged_L3_4Left_IAF	Collagen alpha-1(I) chain OS=Homo sapiens GN=COL1A1 PE=1 SV=5	P02452	COL1A1	138941	10	16	43	GEPGPVGVQGPPGPAGEEGK	K	R	0.997	101	26	19.3	101	0	1	0	0	2	1815.89	3340.66	2987990	449	468
Mudpit_Aged_L3_4Left_IAF	Collagen alpha-1(I) chain OS=Homo sapiens GN=COL1A1 PE=1 SV=5	P02452	COL1A1	138941	10	16	43	GFSGLQGPPGPPGSPGEQGPSGASGPAGPR	R	G	0.997	120	25.6	20.5	120	0	1	3	0	2	2657.27	5236.36	14200000	1112	1141
Mudpit_Aged_L3_4Left_IAF	Collagen alpha-1(I) chain OS=Homo sapiens GN=COL1A1 PE=1 SV=5	P02452	COL1A1	138941	10	16	43	GPAGPQGPR	R	G	0.997	54.9	25	54.1	17.2	0	3	0	0	2	836.438	1172.99	8828530	1085	1093
Mudpit_Aged_L3_4Left_IAF	Collagen alpha-1(I) chain OS=Homo sapiens GN=COL1A1 PE=1 SV=5	P02452	COL1A1	138941	10	16	43	GPPGPMGPPGLAGPPGESGR	R	E	0.997	105	26.3	19.6	105	0	9	4	0	2	1800.87	4458.05	225000000	995	1014
Mudpit_Aged_L3_4Left_IAF	Collagen alpha-1(I) chain OS=Homo sapiens GN=COL1A1 PE=1 SV=5	P02452	COL1A1	138941	10	16	43	GSEGPQGVR	R	G	0.997	38.5	25	15.4	38.5	0	1	0	0	2	886.438	1175.02	1723990	362	370
Mudpit_Aged_L3_4Left_IAF	Collagen alpha-1(I) chain OS=Homo sapiens GN=COL1A1 PE=1 SV=5	P02452	COL1A1	138941	10	16	43	GSPGADGPAGAPGTPGPQGIAGQR	K	G	0.997	80.1	26.2	18	80.1	0	1	0	0	2	2073.01	3347.57	2426840	935	958
Mudpit_Aged_L3_4Left_IAF	Collagen alpha-1(I) chain OS=Homo sapiens GN=COL1A1 PE=1 SV=5	P02452	COL1A1	138941	10	16	43	GVPGPPGAVGPAGK	R	D	0.997	71	27.8	17.4	71	0	3	0	0	2	1160.64	2273.5	82400000	599	612
Mudpit_Aged_L3_4Left_IAF	Collagen alpha-1(I) chain OS=Homo sapiens GN=COL1A1 PE=1 SV=5	P02452	COL1A1	138941	10	16	43	STGGISVPGPMGPSGPR	K	G	0.997	39.2	26.4	15.4	39.2	0	5	0	0	2	1569.77	4105.54	54900000	171	187
Mudpit_Aged_L3_4Left_IAF	Dermatopontin OS=Homo sapiens GN=DPT PE=1 SV=2	Q07507	DPT	24004.7	4	7	16	AGMEWYQTCSNNGLVAGFQSR	R	Y	0.997	102	25	19.3	102	0	5	4	0	2	2377.03	7555.68	32300000	98	118
Mudpit_Aged_L3_4Left_IAF	Dermatopontin OS=Homo sapiens GN=DPT PE=1 SV=2	Q07507	DPT	24004.7	4	7	16	GATTTFSAVER	R	D	0.997	44.2	25	18.7	41.3	0	2	0	0	2	1139.57	2110.32	49500000	170	180
Mudpit_Aged_L3_4Left_IAF	Dermatopontin OS=Homo sapiens GN=DPT PE=1 SV=2	Q07507	DPT	24004.7	4	7	16	QGFSYQCPQGQVIVAVR	R	S	0.997	73	26.2	17.6	73	0	2	0	0	2	1937.95	6451.75	15600000	44	60
Mudpit_Aged_L3_4Left_IAF	Dermatopontin OS=Homo sapiens GN=DPT PE=1 SV=2	Q07507	DPT	24004.7	4	7	16	YFESVLDR	R	E	0.99	38.7	25	29.5	24.7	0	3	0	0	2	1028.5	4800.13	158000000	119	126
Mudpit_Aged_L3_4Left_IAF	Enolase 1, (Alpha), isoform CRA_a OS=Homo sapiens GN=ENO1 PE=2 SV=1	A0A024R4F1,P06733	ENO1	47170.2	11	21	60	AAVPSGASTGIYEALELR	R	D	0.997	104	27.4	19.5	104	0	5	3	0	2	1804.94	7178.43	90300000	33	50
Mudpit_Aged_L3_4Left_IAF	Enolase 1, (Alpha), isoform CRA_a OS=Homo sapiens GN=ENO1 PE=2 SV=1	A0A024R4F1,P06733	ENO1	47170.2	11	21	60	DATNVGDEGGFAPNILENK	K	E	0.997	98.6	25	19.2	98.6	0	4	2	0	2	1960.92	6680.8	37100000	203	221
Mudpit_Aged_L3_4Left_IAF	Enolase 1, (Alpha), isoform CRA_a OS=Homo sapiens GN=ENO1 PE=2 SV=1	A0A024R4F1,P06733	ENO1	47170.2	11	21	60	DYPVVSIEDPFDQDDWGAWQK	K	F	0.997	99.4	25	19.2	99.4	0	5	2	0	2	2510.12	9135.1	82400000	286	306
Mudpit_Aged_L3_4Left_IAF	Enolase 1, (Alpha), isoform CRA_a OS=Homo sapiens GN=ENO1 PE=2 SV=1	A0A024R4F1,P06733	ENO1	47170.2	11	21	60	FTASAGIQVVGDDLTVTNPK	K	R	0.997	135	27.2	21.4	135	0	3	1	0	2	2033.06	6723.7	13000000	307	326
Mudpit_Aged_L3_4Left_IAF	Enolase 1, (Alpha), isoform CRA_a OS=Homo sapiens GN=ENO1 PE=2 SV=1	A0A024R4F1,P06733	ENO1	47170.2	11	21	60	GNPTVEVDLFTSK	R	G	0.997	71.5	26.2	69.9	19.1	0	3	0	0	2	1406.72	5926.31	45100000	16	28
Mudpit_Aged_L3_4Left_IAF	Enolase 1, (Alpha), isoform CRA_a OS=Homo sapiens GN=ENO1 PE=2 SV=1	A0A024R4F1,P06733	ENO1	47170.2	11	21	60	IGAEVYHNLK	R	N	0.997	70.1	28.2	23.3	64.2	0	4	3	0	2	1143.62	1636.48	83100000	184	193
Mudpit_Aged_L3_4Left_IAF	Enolase 1, (Alpha), isoform CRA_a OS=Homo sapiens GN=ENO1 PE=2 SV=1	A0A024R4F1,P06733	ENO1	47170.2	11	21	60	LAMQEFMILPVGAANFR	K	E	0.997	92.7	26.8	18.8	92.7	0	2	2	0	2	1907.99	8789.46	101000000	163	179
Mudpit_Aged_L3_4Left_IAF	Enolase 1, (Alpha), isoform CRA_a OS=Homo sapiens GN=ENO1 PE=2 SV=1	A0A024R4F1,P06733	ENO1	47170.2	11	21	60	LMIEMDGTENK	K	S	0.997	73.2	25	17.6	55.7	0	6	0	0	2	1296.58	3647.21	53800000	93	103
Mudpit_Aged_L3_4Left_IAF	Enolase 1, (Alpha), isoform CRA_a OS=Homo sapiens GN=ENO1 PE=2 SV=1	A0A024R4F1,P06733	ENO1	47170.2	11	21	60	TIAPALVSK	K	K	0.997	38.6	25.9	15.4	38.6	0	1	0	0	2	899.556	2460.16	8340240	72	80
Mudpit_Aged_L3_4Left_IAF	Enolase 1, (Alpha), isoform CRA_a OS=Homo sapiens GN=ENO1 PE=2 SV=1	A0A024R4F1,P06733	ENO1	47170.2	11	21	60	VVIGMDVAASEFFR	K	S	0.997	99.5	27	19.2	99.5	0	8	0	0	2	1540.78	8463.54	95600000	240	253
Mudpit_Aged_L3_4Left_IAF	Enolase 1, (Alpha), isoform CRA_a OS=Homo sapiens GN=ENO1 PE=2 SV=1	A0A024R4F1,P06733	ENO1	47170.2	11	21	60	YISPDQLADLYK	R	S	0.997	70.9	25	17.4	70.9	0	6	0	0	2	1425.73	6882.48	129000000	270	281
Mudpit_Aged_L3_4Left_IAF	Creatine kinase M-type OS=Homo sapiens GN=CKM PE=1 SV=2	P06732	CKM	43101.6	6	8	8	EQQQLIDDHFLFDKPVSPLLLASGMAR	K	D	0.973	35.8	25	15.2	35.8	0	0	0	1	2	3068.59	8915.96	45700000	183	209
Mudpit_Aged_L3_4Left_IAF	Creatine kinase M-type OS=Homo sapiens GN=CKM PE=1 SV=2	P06732	CKM	43101.6	6	8	8	GTGGVDTAAVGSVFDVSNADR	R	L	0.997	75.1	25	17.7	75.1	0	1	1	0	2	1994.94	6449.47	25600000	321	341
Mudpit_Aged_L3_4Left_IAF	Creatine kinase M-type OS=Homo sapiens GN=CKM PE=1 SV=2	P06732	CKM	43101.6	6	8	8	LGSSEVEQVQLVVDGVK	R	L	0.997	131	25.8	21.2	131	0	1	1	0	2	1785.96	6808.82	43200000	342	358
Mudpit_Aged_L3_4Left_IAF	Creatine kinase M-type OS=Homo sapiens GN=CKM PE=1 SV=2	P06732	CKM	43101.6	6	8	8	LNYKPEEEYPDLSK	K	H	0.982	46.5	25.4	15.9	46.5	0	0	1	0	2	1724.84	3766.45	11100000	12	25
Mudpit_Aged_L3_4Left_IAF	Creatine kinase M-type OS=Homo sapiens GN=CKM PE=1 SV=2	P06732	CKM	43101.6	6	8	8	LSVEALNSLTGEFK	K	G	0.997	80.2	28.6	26.2	72	0	1	0	0	2	1507.8	7551.04	5188890	157	170
Mudpit_Aged_L3_4Left_IAF	Creatine kinase M-type OS=Homo sapiens GN=CKM PE=1 SV=2	P06732	CKM	43101.6	6	8	8	VLTLELYK	K	K	0.99	37.3	25	15.3	37.3	0	1	0	0	2	978.587	5469.28	12100000	33	40
Mudpit_Aged_L3_4Left_IAF	Monocyte differentiation antigen CD14 OS=Homo sapiens PE=2 SV=1	B2R888,D6RFL4,F1C4A7,P08571	CD14	40076.6	2	3	3	AFPALTSLDLSDNPGLGER	R	G	0.997	106	27.3	19.6	106	0	1	1	0	2	1973	8231.74	22700000	192	210
Mudpit_Aged_L3_4Left_IAF	Monocyte differentiation antigen CD14 OS=Homo sapiens PE=2 SV=1	B2R888,D6RFL4,F1C4A7,P08571	CD14	40076.6	2	3	3	LKELTLEDLK	R	I	0.983	43.5	25.6	15.7	43.5	0	0	1	0	2	1201.7	4458.92	2161020	118	127
Mudpit_Aged_L3_4Left_IAF	Myosin light polypeptide 6 OS=Homo sapiens GN=MYL6 PE=1 SV=1	B7Z6Z4,F8W1R7,G3V1V0,G8JLA2,J3KND3,P60660	MYL6	16929.8	3	3	3	ALGQNPTNAEVLK	R	V	0.997	41.1	26.9	15.6	41.1	0	1	0	0	2	1354.73	2804.1	6115220	38	50
Mudpit_Aged_L3_4Left_IAF	Myosin light polypeptide 6 OS=Homo sapiens GN=MYL6 PE=1 SV=1	B7Z6Z4,F8W1R7,G3V1V0,G8JLA2,J3KND3,P60660	MYL6	16929.8	3	3	3	EAFQLFDR	K	T	0.951	25.8	26.5	14.6	25.8	0	1	0	0	2	1025.51	5688.94	6145920	14	21
Mudpit_Aged_L3_4Left_IAF	Myosin light polypeptide 6 OS=Homo sapiens GN=MYL6 PE=1 SV=1	B7Z6Z4,F8W1R7,G3V1V0,G8JLA2,J3KND3,P60660	MYL6	16929.8	3	3	3	VLDFEHFLPMLQTVAK	K	N	0.981	37.3	26.7	15.3	37.3	0	0	1	0	2	1888	9018.3	4365540	64	79
Mudpit_Aged_L3_4Left_IAF	Apolipoprotein A-IV OS=Homo sapiens GN=APOA4 PE=1 SV=3	P06727	APOA4	45399.4	25	40	110	ALVQQMEQLR	K	Q	0.997	59.4	28.2	25.5	50.5	0	4	0	0	2	1215.65	3214.91	54000000	317	326
Mudpit_Aged_L3_4Left_IAF	Apolipoprotein A-IV OS=Homo sapiens GN=APOA4 PE=1 SV=3	P06727	APOA4	45399.4	25	40	110	EEIGKELEELR	K	A	0.997	67.5	26.5	17.2	67.5	0	2	2	0	2	1344.7	4423.43	41400000	100	110
Mudpit_Aged_L3_4Left_IAF	Apolipoprotein A-IV OS=Homo sapiens GN=APOA4 PE=1 SV=3	P06727	APOA4	45399.4	25	40	110	ENADSLQASLRPHADELK	R	A	0.997	110	26.6	19.9	110	0	2	2	0	2	1993.99	3342.72	25500000	170	187
Mudpit_Aged_L3_4Left_IAF	Apolipoprotein A-IV OS=Homo sapiens GN=APOA4 PE=1 SV=3	P06727	APOA4	45399.4	25	40	110	IDQNVEELK	K	G	0.997	72.3	26.8	29.5	60.3	0	6	0	0	2	1087.56	2094.17	63400000	190	198
Mudpit_Aged_L3_4Left_IAF	Apolipoprotein A-IV OS=Homo sapiens GN=APOA4 PE=1 SV=3	P06727	APOA4	45399.4	25	40	110	IDQNVEELKGR	K	L	0.997	74.7	26.3	35.6	56.8	0	1	1	0	2	1300.69	1444.38	16300000	190	200
Mudpit_Aged_L3_4Left_IAF	Apolipoprotein A-IV OS=Homo sapiens GN=APOA4 PE=1 SV=3	P06727	APOA4	45399.4	25	40	110	IDQTVEELR	K	R	0.997	66.4	28.2	20.1	63.5	0	3	0	0	2	1102.57	2558.97	76000000	212	220
Mudpit_Aged_L3_4Left_IAF	Apolipoprotein A-IV OS=Homo sapiens GN=APOA4 PE=1 SV=3	P06727	APOA4	45399.4	25	40	110	IDQTVEELRR	K	S	0.985	35.9	27	15.2	35.9	0	1	3	0	2	1258.68	1646.85	68200000	212	221
Mudpit_Aged_L3_4Left_IAF	Apolipoprotein A-IV OS=Homo sapiens GN=APOA4 PE=1 SV=3	P06727	APOA4	45399.4	25	40	110	ISASAEELR	R	Q	0.997	65.5	27.5	32.2	50.4	0	4	0	0	2	975.51	1646.5	1200000000	256	264
Mudpit_Aged_L3_4Left_IAF	Apolipoprotein A-IV OS=Homo sapiens GN=APOA4 PE=1 SV=3	P06727	APOA4	45399.4	25	40	110	LAPLAEDVR	R	G	0.997	56.2	25	30	42.6	0	5	0	0	2	983.552	2984.59	82400000	267	275
Mudpit_Aged_L3_4Left_IAF	Apolipoprotein A-IV OS=Homo sapiens GN=APOA4 PE=1 SV=3	P06727	APOA4	45399.4	25	40	110	LEPYADQLR	R	T	0.997	44.7	28.4	26.7	33.8	0	3	0	0	2	1104.57	3106.24	74900000	135	143
Mudpit_Aged_L3_4Left_IAF	Apolipoprotein A-IV OS=Homo sapiens GN=APOA4 PE=1 SV=3	P06727	APOA4	45399.4	25	40	110	LGEVNTYAGDLQK	K	K	0.997	100	26.1	23.6	95.8	0	5	0	0	2	1407.71	3900.51	397000000	66	78
Mudpit_Aged_L3_4Left_IAF	Apolipoprotein A-IV OS=Homo sapiens GN=APOA4 PE=1 SV=3	P06727	APOA4	45399.4	25	40	110	LGPHAGDVEGHLSFLEK	K	D	0.997	86	27.3	18.4	86	0	3	2	4	2	1805.92	4783.5	117000000	329	345
Mudpit_Aged_L3_4Left_IAF	Apolipoprotein A-IV OS=Homo sapiens GN=APOA4 PE=1 SV=3	P06727	APOA4	45399.4	25	40	110	LGPHAGDVEGHLSFLEKDLR	K	D	0.98	41.9	26.8	15.6	41.9	0	0	0	1	2	2190.13	5282.35	7161320	329	348
Mudpit_Aged_L3_4Left_IAF	Apolipoprotein A-IV OS=Homo sapiens GN=APOA4 PE=1 SV=3	P06727	APOA4	45399.4	25	40	110	LKEEIGKELEELR	K	A	0.997	68.9	25.6	17.3	68.9	0	2	3	3	2	1585.88	4147.77	87200000	98	110
Mudpit_Aged_L3_4Left_IAF	Apolipoprotein A-IV OS=Homo sapiens GN=APOA4 PE=1 SV=3	P06727	APOA4	45399.4	25	40	110	LNHQLEGLTFQMK	K	K	0.997	68.8	27.9	17.3	68.8	0	3	3	0	2	1558.8	4819.41	115000000	234	246
Mudpit_Aged_L3_4Left_IAF	Apolipoprotein A-IV OS=Homo sapiens GN=APOA4 PE=1 SV=3	P06727	APOA4	45399.4	25	40	110	LTPYADEFK	R	V	0.997	41.5	25	15.6	41.5	0	5	0	0	2	1083.54	3780.82	40500000	201	209
Mudpit_Aged_L3_4Left_IAF	Apolipoprotein A-IV OS=Homo sapiens GN=APOA4 PE=1 SV=3	P06727	APOA4	45399.4	25	40	110	LVPFATELHER	K	L	0.997	44.2	25.9	15.8	44.2	0	1	3	0	2	1311.71	4272.28	81100000	80	90
Mudpit_Aged_L3_4Left_IAF	Apolipoprotein A-IV OS=Homo sapiens GN=APOA4 PE=1 SV=3	P06727	APOA4	45399.4	25	40	110	RVEPYGENFNK	R	A	0.979	38.4	27.2	15.4	38.4	0	0	1	0	2	1352.66	1384.88	15100000	306	316
Mudpit_Aged_L3_4Left_IAF	Apolipoprotein A-IV OS=Homo sapiens GN=APOA4 PE=1 SV=3	P06727	APOA4	45399.4	25	40	110	SELTQQLNALFQDK	K	L	0.997	107	27.6	19.7	107	0	7	6	0	2	1634.84	7956.67	106000000	52	65
Mudpit_Aged_L3_4Left_IAF	Apolipoprotein A-IV OS=Homo sapiens GN=APOA4 PE=1 SV=3	P06727	APOA4	45399.4	25	40	110	SLAELGGHLDQQVEEFR	K	R	0.997	146	26.5	22.1	146	0	3	5	0	2	1927.95	5954.68	145000000	288	304
Mudpit_Aged_L3_4Left_IAF	Apolipoprotein A-IV OS=Homo sapiens GN=APOA4 PE=1 SV=3	P06727	APOA4	45399.4	25	40	110	SLAELGGHLDQQVEEFRR	K	R	0.948	34.9	28.5	15.2	34.9	0	0	1	0	2	2084.05	4801.24	7847930	288	305
Mudpit_Aged_L3_4Left_IAF	Apolipoprotein A-IV OS=Homo sapiens GN=APOA4 PE=1 SV=3	P06727	APOA4	45399.4	25	40	110	SLAPYAQDTQEK	R	L	0.997	57.8	28.5	16.6	57.8	0	5	0	0	2	1350.65	1892.7	109000000	222	233
Mudpit_Aged_L3_4Left_IAF	Apolipoprotein A-IV OS=Homo sapiens GN=APOA4 PE=1 SV=3	P06727	APOA4	45399.4	25	40	110	TQVNTQAEQLR	R	R	0.997	52.9	26.4	16.3	52.9	0	2	0	0	2	1287.67	1367.2	34700000	144	154
Mudpit_Aged_L3_4Left_IAF	Apolipoprotein A-IV OS=Homo sapiens GN=APOA4 PE=1 SV=3	P06727	APOA4	45399.4	25	40	110	VEPYGENFNK	R	A	0.997	52.8	28.9	17.2	51.8	0	2	0	0	2	1196.56	2128.84	31400000	307	316
Mudpit_Aged_L3_4Left_IAF	Apolipoprotein A-IV OS=Homo sapiens GN=APOA4 PE=1 SV=3	P06727	APOA4	45399.4	25	40	110	VNSFFSTFK	K	E	0.997	53.6	27.1	16.4	53.6	0	1	0	0	2	1076.54	5616.38	19100000	351	359
Mudpit_Aged_L3_4Left_IAF	Platelet-derived growth factor receptor-like protein OS=Homo sapiens GN=PDGFRL PE=1 SV=1	Q15198	PDGFRL	41860.9	5	7	13	DERPVTIQDTWR	K	L	0.997	49.2	26.7	16.1	49.2	0	2	1	0	2	1515.76	4017.16	31500000	314	325
Mudpit_Aged_L3_4Left_IAF	Platelet-derived growth factor receptor-like protein OS=Homo sapiens GN=PDGFRL PE=1 SV=1	Q15198	PDGFRL	41860.9	5	7	13	GELFVPSPSYFDVVYLNPDR	K	Q	0.997	94.6	26.2	18.9	94.6	0	1	1	0	2	2314.14	9074.32	14000000	171	190
Mudpit_Aged_L3_4Left_IAF	Platelet-derived growth factor receptor-like protein OS=Homo sapiens GN=PDGFRL PE=1 SV=1	Q15198	PDGFRL	41860.9	5	7	13	IGWSYPAYLDTFK	R	D	0.997	58.9	26.4	16.7	58.9	0	5	0	0	2	1560.77	7876.35	28800000	101	113
Mudpit_Aged_L3_4Left_IAF	Platelet-derived growth factor receptor-like protein OS=Homo sapiens GN=PDGFRL PE=1 SV=1	Q15198	PDGFRL	41860.9	5	7	13	TGSTYIFFTEK	K	G	0.997	62.5	26.1	16.9	62.5	0	2	0	0	2	1293.64	5694.78	22000000	160	170
Mudpit_Aged_L3_4Left_IAF	Platelet-derived growth factor receptor-like protein OS=Homo sapiens GN=PDGFRL PE=1 SV=1	Q15198	PDGFRL	41860.9	5	7	13	YQLLYVAVPSGPPSTTILASSNK	K	V	0.967	38.7	25.1	15.4	38.7	0	0	1	0	2	2406.29	8448	1778290	260	282
Mudpit_Aged_L3_4Left_IAF	Immunoglobulin J chain (Fragment) OS=Homo sapiens GN=JCHAIN PE=1 SV=7	D6RD17,P01591	JCHAIN	18098.5	2	2	4	IIVPLNNR	R	E	0.99	42.8	25	19.5	38.9	0	2	0	0	2	938.578	3188.98	25600000	62	69
Mudpit_Aged_L3_4Left_IAF	Immunoglobulin J chain (Fragment) OS=Homo sapiens GN=JCHAIN PE=1 SV=7	D6RD17,P01591	JCHAIN	18098.5	2	2	4	SSEDPNEDIVER	R	N	0.997	74.4	25	17.6	74.4	0	2	0	0	2	1389.61	1953.87	21100000	47	58
Mudpit_Aged_L3_4Left_IAF	Immunoglobulin alpha-2 heavy chain OS=Homo sapiens PE=1 SV=1	IGA2_HUMAN		0	4	6	19	DASGATFTWTPSSGK	?	?	0.997	95.2	25.8	18.9	95.2	0	4	0	0	2	1512.7	5237.15	22200000	0	0
Mudpit_Aged_L3_4Left_IAF	Immunoglobulin alpha-2 heavy chain OS=Homo sapiens PE=1 SV=1	IGA2_HUMAN		0	4	6	19	EVQLVETGGGLIQPGGSLR	?	?	0.997	86.4	30.6	49.3	55.5	0	5	2	0	2	1910.03	7077.65	28300000	0	0
Mudpit_Aged_L3_4Left_IAF	Immunoglobulin alpha-2 heavy chain OS=Homo sapiens PE=1 SV=1	IGA2_HUMAN		0	4	6	19	GTTVTVSSASPTSPK	?	?	0.997	73.1	27.7	17.6	73.1	0	2	0	0	2	1419.73	1565.64	31000000	0	0
Mudpit_Aged_L3_4Left_IAF	Immunoglobulin alpha-2 heavy chain OS=Homo sapiens PE=1 SV=1	IGA2_HUMAN		0	4	6	19	WLQGSQELPR	R	E	0.997	69.7	25.6	17.4	69.7	0	5	1	0	2	1213.63	4001.5	95400000	0	0
Mudpit_Aged_L3_4Left_IAF	Myoglobin OS=Homo sapiens GN=MB PE=4 SV=1	A0A024R1G3,A0A1K0FU49_HUMAN,B0QYF8,P02144	MB	17184.4	3	5	5	HGATVLTALGGILK	K	K	0.997	97	25	19.1	97	0	1	1	0	2	1350.81	6408.17	34600000	65	78
Mudpit_Aged_L3_4Left_IAF	Myoglobin OS=Homo sapiens GN=MB PE=4 SV=1	A0A024R1G3,A0A1K0FU49_HUMAN,B0QYF8,P02144	MB	17184.4	3	5	5	HPGDFGADAQGAMNK	K	A	0.997	81.6	25	18.1	81.6	0	1	1	0	2	1515.66	1707.57	40000000	120	134
Mudpit_Aged_L3_4Left_IAF	Myoglobin OS=Homo sapiens GN=MB PE=4 SV=1	A0A024R1G3,A0A1K0FU49_HUMAN,B0QYF8,P02144	MB	17184.4	3	5	5	VEADIPGHGQEVLIR	K	L	0.997	57.9	26.6	16.7	57.8	0	0	1	0	2	1632.87	4107.23	18100000	18	32
Mudpit_Aged_L3_4Left_IAF	GDH/6PGL endoplasmic bifunctional protein OS=Homo sapiens GN=H6PD PE=1 SV=2	O95479,R4GMU1	H6PD	88893.6	2	2	2	ESPLVSAWSEELISK	R	L	0.993	32.1	27.1	15	32.1	0	1	0	0	2	1674.86	7967.26	2451700	552	566
Mudpit_Aged_L3_4Left_IAF	GDH/6PGL endoplasmic bifunctional protein OS=Homo sapiens GN=H6PD PE=1 SV=2	O95479,R4GMU1	H6PD	88893.6	2	2	2	LANDIEATAVR	K	A	0.997	39.5	26.4	28	27	0	1	0	0	2	1172.63	2689.15	2335800	567	577
Mudpit_Aged_L3_4Left_IAF	von Willebrand factor OS=Homo sapiens GN=VWF PE=4 SV=1	L8E853,P04275	VWF	309251	11	13	18	ALSVVWDR	K	H	0.99	50.3	32.6	16.1	50.3	0	1	0	0	2	945.515	4674.22	4931310	969	976
Mudpit_Aged_L3_4Left_IAF	von Willebrand factor OS=Homo sapiens GN=VWF PE=4 SV=1	L8E853,P04275	VWF	309251	11	13	18	DETHFEVVESGR	K	Y	0.997	51.9	25	16.2	51.9	0	2	0	0	2	1404.64	2579.92	12800000	949	960
Mudpit_Aged_L3_4Left_IAF	von Willebrand factor OS=Homo sapiens GN=VWF PE=4 SV=1	L8E853,P04275	VWF	309251	11	13	18	EFMEEVIQR	K	M	0.997	59.8	26.3	23.5	53	0	3	0	0	2	1180.57	5096.06	25800000	1519	1527
Mudpit_Aged_L3_4Left_IAF	von Willebrand factor OS=Homo sapiens GN=VWF PE=4 SV=1	L8E853,P04275	VWF	309251	11	13	18	EGGPSQIGDALGFAVR	R	Y	0.997	80.7	27.4	18	80.7	0	1	0	0	2	1573.8	6927.43	4774660	1764	1779
Mudpit_Aged_L3_4Left_IAF	von Willebrand factor OS=Homo sapiens GN=VWF PE=4 SV=1	L8E853,P04275	VWF	309251	11	13	18	HIVTFDGQNFK	R	L	0.997	40.3	26.5	15.5	40.3	0	1	1	0	2	1305.66	3279.67	8072890	1957	1967
Mudpit_Aged_L3_4Left_IAF	von Willebrand factor OS=Homo sapiens GN=VWF PE=4 SV=1	L8E853,P04275	VWF	309251	11	13	18	IEDLPTMVTLGNSFLHK	R	L	0.986	40.1	27.1	15.5	40.1	0	0	1	0	2	1915	8020.53	4753370	1854	1870
Mudpit_Aged_L3_4Left_IAF	von Willebrand factor OS=Homo sapiens GN=VWF PE=4 SV=1	L8E853,P04275	VWF	309251	11	13	18	ILAGPAGDSNVVK	R	L	0.997	35	25	15.2	35	0	1	0	0	2	1240.69	2760.64	3173520	1838	1850
Mudpit_Aged_L3_4Left_IAF	von Willebrand factor OS=Homo sapiens GN=VWF PE=4 SV=1	L8E853,P04275	VWF	309251	11	13	18	LSEAEFEVLK	R	A	0.997	77.1	25.7	17.8	77.1	0	1	0	0	2	1164.61	5526.96	24600000	1288	1297
Mudpit_Aged_L3_4Left_IAF	von Willebrand factor OS=Homo sapiens GN=VWF PE=4 SV=1	L8E853,P04275	VWF	309251	11	13	18	RLPGDIQVVPIGVGPNANVQELER	K	I	0.995	49.6	25	16.1	49.6	0	0	1	0	2	2570.41	7085.52	2495310	1618	1641
Mudpit_Aged_L3_4Left_IAF	von Willebrand factor OS=Homo sapiens GN=VWF PE=4 SV=1	L8E853,P04275	VWF	309251	11	13	18	VTVFPIGIGDR	R	Y	0.997	48	27.1	16	48	0	3	0	0	2	1173.66	6525.34	23600000	1820	1830
Mudpit_Aged_L3_4Left_IAF	von Willebrand factor OS=Homo sapiens GN=VWF PE=4 SV=1	L8E853,P04275	VWF	309251	11	13	18	YAGSQVASTSEVLK	K	Y	0.997	65.6	26.7	17.1	65.6	0	2	0	0	2	1439.74	3046.61	7478710	1349	1362
Mudpit_Aged_L3_4Left_IAF	Plasma kallikrein (Fragment) OS=Homo sapiens GN=KLKB1 PE=1 SV=1	H0YAC1,P03952	KLKB1	71369.7	7	9	14	DSVTGTLPK	K	V	0.997	54.9	27.9	16.4	54.9	0	3	0	0	2	917.494	1970.62	22000000	81	89
Mudpit_Aged_L3_4Left_IAF	Plasma kallikrein (Fragment) OS=Homo sapiens GN=KLKB1 PE=1 SV=1	H0YAC1,P03952	KLKB1	71369.7	7	9	14	EIIIHQNYK	K	V	0.95	31.2	26.4	15	31.2	0	0	1	0	2	1157.63	1426.36	4143720	468	476
Mudpit_Aged_L3_4Left_IAF	Plasma kallikrein (Fragment) OS=Homo sapiens GN=KLKB1 PE=1 SV=1	H0YAC1,P03952	KLKB1	71369.7	7	9	14	GEIQNILQK	K	V	0.994	34.7	26	24.7	25.1	0	2	0	0	2	1042.59	3691.51	24400000	529	537
Mudpit_Aged_L3_4Left_IAF	Plasma kallikrein (Fragment) OS=Homo sapiens GN=KLKB1 PE=1 SV=1	H0YAC1,P03952	KLKB1	71369.7	7	9	14	IYSGILNLSDITK	R	D	0.997	78.1	25.6	17.9	78.1	0	2	0	0	2	1436.8	7423.77	12800000	447	459
Mudpit_Aged_L3_4Left_IAF	Plasma kallikrein (Fragment) OS=Homo sapiens GN=KLKB1 PE=1 SV=1	H0YAC1,P03952	KLKB1	71369.7	7	9	14	VAEYMDWILEK	K	T	0.997	61.3	29.5	16.8	61.3	0	3	0	0	2	1396.68	7883.66	23300000	614	624
Mudpit_Aged_L3_4Left_IAF	Plasma kallikrein (Fragment) OS=Homo sapiens GN=KLKB1 PE=1 SV=1	H0YAC1,P03952	KLKB1	71369.7	7	9	14	VSEGNHDIALIK	K	L	0.997	41.7	25.7	22.1	35.3	0	1	1	0	2	1295.7	2099.6	35200000	477	488
Mudpit_Aged_L3_4Left_IAF	Plasma kallikrein (Fragment) OS=Homo sapiens GN=KLKB1 PE=1 SV=1	H0YAC1,P03952	KLKB1	71369.7	7	9	14	YSPGGTPTAIK	K	V	0.997	46.5	27.9	15.9	46.5	0	1	0	0	2	1091.57	1660.43	9080930	170	180
Mudpit_Aged_L3_4Left_IAF	Protein S100 (Fragment) OS=Homo sapiens GN=S100B PE=2 SV=1	A0A0S2Z4C5,P04271	S100B	10712.9	3	5	7	AMVALIDVFHQYSGR	K	E	0.995	51.9	27	16.2	51.9	0	0	2	0	2	1722.86	7241.49	25000000	7	21
Mudpit_Aged_L3_4Left_IAF	Protein S100 (Fragment) OS=Homo sapiens GN=S100B PE=2 SV=1	A0A0S2Z4C5,P04271	S100B	10712.9	3	5	7	ELINNELSHFLEEIK	K	E	0.991	43.2	26.9	15.7	43.2	0	0	1	0	2	1827.95	8783.35	5612090	35	49
Mudpit_Aged_L3_4Left_IAF	Protein S100 (Fragment) OS=Homo sapiens GN=S100B PE=2 SV=1	A0A0S2Z4C5,P04271	S100B	10712.9	3	5	7	ELINNELSHFLEEIKEQEVVDK	K	V	0.997	85.7	26.2	18.4	85.7	0	0	1	3	2	2655.35	8876.05	46100000	35	56
Mudpit_Aged_L3_4Left_IAF	Sex hormone-binding globulin OS=Homo sapiens GN=SHBG PE=1 SV=1	I3L145,P04278	SHBG	43780.6	3	4	5	DDWFMLGLR	K	D	0.985	28.2	25	14.8	28.2	0	1	0	0	2	1168.55	8323.89	3099100	93	101
Mudpit_Aged_L3_4Left_IAF	Sex hormone-binding globulin OS=Homo sapiens GN=SHBG PE=1 SV=1	I3L145,P04278	SHBG	43780.6	3	4	5	MEGDSVLLEVDGEEVLR	K	L	0.997	91.7	26.2	18.7	91.7	0	2	0	0	2	1905.91	7581.1	6767330	136	152
Mudpit_Aged_L3_4Left_IAF	Sex hormone-binding globulin OS=Homo sapiens GN=SHBG PE=1 SV=1	I3L145,P04278	SHBG	43780.6	3	4	5	QAAGSGHLLALGTPENPSWLSLHLQDQK	K	V	0.997	93.7	25.8	18.9	93.7	0	0	2	0	2	2968.53	6948.39	4444710	258	285
Mudpit_Aged_L3_4Left_IAF	Keratin 1 OS=Homo sapiens GN=KRT1 PE=3 SV=1	H6VRF8,H6VRG0,H6VRG1,P04264	KRT1	66040.3	25	35	58	AEAESLYQSKYEELQITAGR	K	H	0.997	81.6	26.1	18.1	81.6	0	0	2	0	2	2286.12	5356.66	20600000	367	386
Mudpit_Aged_L3_4Left_IAF	Keratin 1 OS=Homo sapiens GN=KRT1 PE=3 SV=1	H6VRF8,H6VRG0,H6VRG1,P04264	KRT1	66040.3	25	35	58	FLEQQNQVLQTKWELLQQVDTSTR	R	T	0.997	105	26.9	19.5	105	0	0	2	0	2	2932.52	7609.95	29100000	200	223
Mudpit_Aged_L3_4Left_IAF	Keratin 1 OS=Homo sapiens GN=KRT1 PE=3 SV=1	H6VRF8,H6VRG0,H6VRG1,P04264	KRT1	66040.3	25	35	58	GGGGGGYGSGGSSYGSGGGSYGSGGGGGGGR	R	G	0.997	156	25	22.7	156	0	3	3	0	2	2383.95	1441.73	48000000	519	549
Mudpit_Aged_L3_4Left_IAF	Keratin 1 OS=Homo sapiens GN=KRT1 PE=3 SV=1	H6VRF8,H6VRG0,H6VRG1,P04264	KRT1	66040.3	25	35	58	GSYGSGGSSYGSGGGSYGSGGGGGGHGSYGSGSSSGGYR	R	G	0.997	110	25	19.9	110	0	0	2	0	2	3312.31	1746.29	8869870	550	588
Mudpit_Aged_L3_4Left_IAF	Keratin 1 OS=Homo sapiens GN=KRT1 PE=3 SV=1	H6VRF8,H6VRG0,H6VRG1,P04264	KRT1	66040.3	25	35	58	GSYGSGGSSYGSGGGSYGSGGGGGGHGSYGSGSSSGGYRGGSGGGGGGSSGGR	R	G	0.977	37.2	25	15.3	37.2	0	0	0	1	2	4299.72	1242.37	9248300	550	602
Mudpit_Aged_L3_4Left_IAF	Keratin 1 OS=Homo sapiens GN=KRT1 PE=3 SV=1	H6VRF8,H6VRG0,H6VRG1,P04264	KRT1	66040.3	25	35	58	LALDLEIATYR	K	T	0.997	63.1	26.1	25.4	0	0	1	0	0	2	1277.71	7144.64	7895210	473	483
Mudpit_Aged_L3_4Left_IAF	Keratin 1 OS=Homo sapiens GN=KRT1 PE=3 SV=1	H6VRF8,H6VRG0,H6VRG1,P04264	KRT1	66040.3	25	35	58	LLRDYQELMNTK	R	L	0.991	30.6	25.8	14.9	30.6	0	1	0	0	2	1539.78	2529.99	2031140	461	472
Mudpit_Aged_L3_4Left_IAF	Keratin 1 OS=Homo sapiens GN=KRT1 PE=3 SV=1	H6VRF8,H6VRG0,H6VRG1,P04264	KRT1	66040.3	25	35	58	LNDLEDALQQAK	K	E	0.997	62.6	27.7	16.9	62.6	0	1	0	0	2	1357.7	5242.72	8678330	444	455
Mudpit_Aged_L3_4Left_IAF	Keratin 1 OS=Homo sapiens GN=KRT1 PE=3 SV=1	H6VRF8,H6VRG0,H6VRG1,P04264	KRT1	66040.3	25	35	58	LNDLEDALQQAKEDLAR	K	L	0.982	40.2	26.5	15.5	40.2	0	0	1	0	2	1941.99	7560.92	3156690	444	460
Mudpit_Aged_L3_4Left_IAF	Keratin 1 OS=Homo sapiens GN=KRT1 PE=3 SV=1	H6VRF8,H6VRG0,H6VRG1,P04264	KRT1	66040.3	25	35	58	NKLNDLEDALQQAKEDLAR	K	L	0.997	65.5	26.5	17.1	65.5	0	0	1	1	2	2184.13	7366.06	14100000	442	460
Mudpit_Aged_L3_4Left_IAF	Keratin 1 OS=Homo sapiens GN=KRT1 PE=3 SV=1	H6VRF8,H6VRG0,H6VRG1,P04264	KRT1	66040.3	25	35	58	NSKIEISELNR	R	V	0.996	56.7	28.2	25.1	48.1	0	0	1	0	2	1302.7	1985.07	11500000	393	403
Mudpit_Aged_L3_4Left_IAF	Keratin 1 OS=Homo sapiens GN=KRT1 PE=3 SV=1	H6VRF8,H6VRG0,H6VRG1,P04264	KRT1	66040.3	25	35	58	QISNLQQSISDAEQR	K	G	0.997	65.2	26.9	17.1	65.2	0	1	0	0	2	1716.85	4458.84	2663630	418	432
Mudpit_Aged_L3_4Left_IAF	Keratin 1 OS=Homo sapiens GN=KRT1 PE=3 SV=1	H6VRF8,H6VRG0,H6VRG1,P04264	KRT1	66040.3	25	35	58	SISISVAR	K	G	0.99	51.6	25.4	23.9	43.9	0	3	0	0	2	832.489	2383.66	55700000	75	82
Mudpit_Aged_L3_4Left_IAF	Keratin 1 OS=Homo sapiens GN=KRT1 PE=3 SV=1	H6VRF8,H6VRG0,H6VRG1,P04264	KRT1	66040.3	25	35	58	SKAEAESLYQSKYEELQITAGR	K	H	0.997	117	26	20.3	117	0	2	3	1	2	2501.25	4576.28	162000000	365	386
Mudpit_Aged_L3_4Left_IAF	Keratin 1 OS=Homo sapiens GN=KRT1 PE=3 SV=1	H6VRF8,H6VRG0,H6VRG1,P04264	KRT1	66040.3	25	35	58	SLDLDSIIAEVK	R	A	0.997	71.1	27.4	17.4	71.1	0	3	1	0	2	1302.72	8639.12	41200000	344	355
Mudpit_Aged_L3_4Left_IAF	Keratin 1 OS=Homo sapiens GN=KRT1 PE=3 SV=1	H6VRF8,H6VRG0,H6VRG1,P04264	KRT1	66040.3	25	35	58	SLDLDSIIAEVKAQYEDIAQK	R	S	0.997	107	26.2	19.7	107	0	1	2	0	2	2349.22	9138.73	72200000	344	364
Mudpit_Aged_L3_4Left_IAF	Keratin 1 OS=Homo sapiens GN=KRT1 PE=3 SV=1	H6VRF8,H6VRG0,H6VRG1,P04264	KRT1	66040.3	25	35	58	SLNNQFASFIDK	K	V	0.997	73.4	26	17.6	73.4	0	2	0	0	2	1383.69	6208.45	12900000	186	197
Mudpit_Aged_L3_4Left_IAF	Keratin 1 OS=Homo sapiens GN=KRT1 PE=3 SV=1	H6VRF8,H6VRG0,H6VRG1,P04264	KRT1	66040.3	25	35	58	SLNNQFASFIDKVR	K	F	0.997	87	26.4	18.4	87	0	2	2	0	2	1638.86	6454.63	181000000	186	199
Mudpit_Aged_L3_4Left_IAF	Keratin 1 OS=Homo sapiens GN=KRT1 PE=3 SV=1	H6VRF8,H6VRG0,H6VRG1,P04264	KRT1	66040.3	25	35	58	SLVNLGGSK	R	S	0.997	53.9	28.1	19.7	50.5	0	1	0	0	2	874.499	2269.67	21300000	66	74
Mudpit_Aged_L3_4Left_IAF	Keratin 1 OS=Homo sapiens GN=KRT1 PE=3 SV=1	H6VRF8,H6VRG0,H6VRG1,P04264	KRT1	66040.3	25	35	58	SLVNLGGSKSISISVAR	R	G	0.997	62.8	25	16.9	62.8	0	1	1	0	2	1687.97	5198.97	22800000	66	82
Mudpit_Aged_L3_4Left_IAF	Keratin 1 OS=Homo sapiens GN=KRT1 PE=3 SV=1	H6VRF8,H6VRG0,H6VRG1,P04264	KRT1	66040.3	25	35	58	THNLEPYFESFINNLR	R	R	0.997	88.2	27.1	18.5	88.2	0	1	2	0	2	1993.98	8300.18	29800000	224	239
Mudpit_Aged_L3_4Left_IAF	Keratin 1 OS=Homo sapiens GN=KRT1 PE=3 SV=1	H6VRF8,H6VRG0,H6VRG1,P04264	KRT1	66040.3	25	35	58	THNLEPYFESFINNLRR	R	R	0.953	33.3	27.8	15.1	33.3	0	0	0	1	2	2150.08	7497.71	12100000	224	240
Mudpit_Aged_L3_4Left_IAF	Keratin 1 OS=Homo sapiens GN=KRT1 PE=3 SV=1	H6VRF8,H6VRG0,H6VRG1,P04264	KRT1	66040.3	25	35	58	TNAENEFVTIK	R	K	0.997	59.4	27.1	16.7	59.4	0	2	0	0	2	1265.64	3659.73	10500000	278	288
Mudpit_Aged_L3_4Left_IAF	Keratin 1 OS=Homo sapiens GN=KRT1 PE=3 SV=1	H6VRF8,H6VRG0,H6VRG1,P04264	KRT1	66040.3	25	35	58	TNAENEFVTIKK	R	D	0.997	73.1	26.1	17.6	73.1	0	2	1	0	2	1393.73	1977.3	27200000	278	289
Mudpit_Aged_L3_4Left_IAF	Keratin 1 OS=Homo sapiens GN=KRT1 PE=3 SV=1	H6VRF8,H6VRG0,H6VRG1,P04264	KRT1	66040.3	25	35	58	YEELQITAGR	K	H	0.997	51.5	26.6	16.2	51.5	0	3	0	0	2	1179.6	3613.65	53600000	377	386
Mudpit_Aged_L3_4Left_IAF	Protein disulfide-isomerase OS=Homo sapiens GN=P4HB PE=3 SV=1	A0A024R8S5,P07237	P4HB	57118.1	12	14	18	EADDIVNWLK	R	K	0.997	53.9	25	16.4	53.9	0	2	0	0	2	1202.61	7232.07	15300000	121	130
Mudpit_Aged_L3_4Left_IAF	Protein disulfide-isomerase OS=Homo sapiens GN=P4HB PE=3 SV=1	A0A024R8S5,P07237	P4HB	57118.1	12	14	18	ENLLDFIK	K	H	0.99	41	27.4	24.7	31.8	0	2	0	0	2	991.546	7681.58	8625140	223	230
Mudpit_Aged_L3_4Left_IAF	Protein disulfide-isomerase OS=Homo sapiens GN=P4HB PE=3 SV=1	A0A024R8S5,P07237	P4HB	57118.1	12	14	18	HNQLPLVIEFTEQTAPK	K	I	0.99	43.3	25.1	15.7	43.3	0	0	1	0	2	1965.04	6700.54	3560670	231	247
Mudpit_Aged_L3_4Left_IAF	Protein disulfide-isomerase OS=Homo sapiens GN=P4HB PE=3 SV=1	A0A024R8S5,P07237	P4HB	57118.1	12	14	18	ILEFFGLK	R	K	0.99	43.4	25	30.1	29	0	1	0	0	2	966.566	7642.09	6569040	301	308
Mudpit_Aged_L3_4Left_IAF	Protein disulfide-isomerase OS=Homo sapiens GN=P4HB PE=3 SV=1	A0A024R8S5,P07237	P4HB	57118.1	12	14	18	LITLEEEMTK	R	Y	0.997	40.5	26.3	15.5	40.5	0	1	0	0	2	1206.63	4983.55	4435000	317	326
Mudpit_Aged_L3_4Left_IAF	Protein disulfide-isomerase OS=Homo sapiens GN=P4HB PE=3 SV=1	A0A024R8S5,P07237	P4HB	57118.1	12	14	18	MDSTANEVEAVK	K	V	0.997	69.2	25	17.3	69.2	0	2	0	0	2	1293.6	1694.49	10700000	425	436
Mudpit_Aged_L3_4Left_IAF	Protein disulfide-isomerase OS=Homo sapiens GN=P4HB PE=3 SV=1	A0A024R8S5,P07237	P4HB	57118.1	12	14	18	NFEDVAFDEK	K	K	0.997	61.5	25	16.8	61.5	0	1	0	0	2	1213.54	4806.68	7342110	376	385
Mudpit_Aged_L3_4Left_IAF	Protein disulfide-isomerase OS=Homo sapiens GN=P4HB PE=3 SV=1	A0A024R8S5,P07237	P4HB	57118.1	12	14	18	QLAPIWDK	K	L	0.99	39.7	25.7	22.4	32.8	0	1	0	0	2	970.536	4471.72	7173370	402	409
Mudpit_Aged_L3_4Left_IAF	Protein disulfide-isomerase OS=Homo sapiens GN=P4HB PE=3 SV=1	A0A024R8S5,P07237	P4HB	57118.1	12	14	18	SNFAEALAAHK	K	Y	0.997	62.3	26.2	16.9	62.3	0	1	2	0	2	1158.59	2323.35	17400000	32	42
Mudpit_Aged_L3_4Left_IAF	Protein disulfide-isomerase OS=Homo sapiens GN=P4HB PE=3 SV=1	A0A024R8S5,P07237	P4HB	57118.1	12	14	18	TGPAATTLPDGAAAESLVESSEVAVIGFFK	R	D	0.99	42.8	25.5	15.7	42.8	0	0	1	0	2	2935.49	9265.13	1160850	133	162
Mudpit_Aged_L3_4Left_IAF	Protein disulfide-isomerase OS=Homo sapiens GN=P4HB PE=3 SV=1	A0A024R8S5,P07237	P4HB	57118.1	12	14	18	VDATEESDLAQQYGVR	K	G	0.997	142	25	21.9	142	0	2	0	0	2	1780.83	5246.9	5620920	82	97
Mudpit_Aged_L3_4Left_IAF	Protein disulfide-isomerase OS=Homo sapiens GN=P4HB PE=3 SV=1	A0A024R8S5,P07237	P4HB	57118.1	12	14	18	YKPESEELTAER	K	I	0.997	70	25.9	19.1	68.3	0	0	1	0	2	1451.7	1363.46	28700000	327	338
Mudpit_Aged_L3_4Left_IAF	Profilin-1 OS=Homo sapiens GN=PFN1 PE=1 SV=2	P07737	PFN1	15054.3	4	5	6	DSLLQDGEFSMDLR	R	T	0.997	60.5	35.9	16.8	60.5	0	2	0	0	2	1625.75	7397.35	8677000	76	89
Mudpit_Aged_L3_4Left_IAF	Profilin-1 OS=Homo sapiens GN=PFN1 PE=1 SV=2	P07737	PFN1	15054.3	4	5	6	DSPSVWAAVPGK	K	T	0.997	37	25	15.3	37	0	1	0	0	2	1213.62	5282.45	4701540	27	38
Mudpit_Aged_L3_4Left_IAF	Profilin-1 OS=Homo sapiens GN=PFN1 PE=1 SV=2	P07737	PFN1	15054.3	4	5	6	STGGAPTFNVTVTK	K	T	0.997	43.2	27.2	15.7	43.2	0	1	0	0	2	1379.72	3940.74	3222350	92	105
Mudpit_Aged_L3_4Left_IAF	Profilin-1 OS=Homo sapiens GN=PFN1 PE=1 SV=2	P07737	PFN1	15054.3	4	5	6	TFVNITPAEVGVLVGK	K	D	0.997	52.8	25	16.3	52.8	0	2	0	0	2	1643.94	8170.94	6625640	39	54
Mudpit_Aged_L3_4Left_IAF	Annexin (Fragment) OS=Homo sapiens GN=ANXA6 PE=2 SV=1	A0A0S2Z2Z6,P08133	ANXA6	75877.5	9	9	14	EAILDIITSR	K	S	0.997	40.1	26.4	15.5	40.1	0	2	0	0	2	1130.64	7734.21	20300000	41	50
Mudpit_Aged_L3_4Left_IAF	Annexin (Fragment) OS=Homo sapiens GN=ANXA6 PE=2 SV=1	A0A0S2Z2Z6,P08133	ANXA6	75877.5	9	9	14	EDAQVAAEILEIADTPSGDK	R	T	0.997	96.6	26	19	96.6	0	1	0	0	2	2072	8416.18	920604	521	540
Mudpit_Aged_L3_4Left_IAF	Annexin (Fragment) OS=Homo sapiens GN=ANXA6 PE=2 SV=1	A0A0S2Z2Z6,P08133	ANXA6	75877.5	9	9	14	GLGTDEDTIIDIITHR	K	S	0.997	86.4	26.6	18.4	86.4	0	0	4	0	2	1768.91	8261.08	27400000	378	393
Mudpit_Aged_L3_4Left_IAF	Annexin (Fragment) OS=Homo sapiens GN=ANXA6 PE=2 SV=1	A0A0S2Z2Z6,P08133	ANXA6	75877.5	9	9	14	ILISLATGHR	R	E	0.996	57.2	25	16.6	57.2	0	0	1	0	2	1080.65	3143.54	5152530	500	509
Mudpit_Aged_L3_4Left_IAF	Annexin (Fragment) OS=Homo sapiens GN=ANXA6 PE=2 SV=1	A0A0S2Z2Z6,P08133	ANXA6	75877.5	9	9	14	LVFDEYLK	R	T	0.99	36.6	25	21.6	30.3	0	2	0	0	2	1026.55	5988.61	16700000	213	220
Mudpit_Aged_L3_4Left_IAF	Annexin (Fragment) OS=Homo sapiens GN=ANXA6 PE=2 SV=1	A0A0S2Z2Z6,P08133	ANXA6	75877.5	9	9	14	MLVVLLQGTR	K	E	0.997	46.8	25.3	24.8	37.9	0	1	0	0	2	1129.68	6094.69	5402130	157	166
Mudpit_Aged_L3_4Left_IAF	Annexin (Fragment) OS=Homo sapiens GN=ANXA6 PE=2 SV=1	A0A0S2Z2Z6,P08133	ANXA6	75877.5	9	9	14	SELDMLDIR	R	E	0.997	41.9	27.1	15.6	41.9	0	1	0	0	2	1091.54	6324.02	5986410	282	290
Mudpit_Aged_L3_4Left_IAF	Annexin (Fragment) OS=Homo sapiens GN=ANXA6 PE=2 SV=1	A0A0S2Z2Z6,P08133	ANXA6	75877.5	9	9	14	STPEYFAER	R	L	0.997	38.1	25	15.4	38.1	0	1	0	0	2	1099.51	2445.18	7271880	251	259
Mudpit_Aged_L3_4Left_IAF	Annexin (Fragment) OS=Homo sapiens GN=ANXA6 PE=2 SV=1	A0A0S2Z2Z6,P08133	ANXA6	75877.5	9	9	14	TNEQMHQLVAAYK	R	D	0.997	41.5	25.8	15.6	41.5	0	1	0	0	2	1532.75	2542.07	2497740	123	135
Mudpit_Aged_L3_4Left_IAF	Collagen, type IV, alpha 2, isoform CRA_a OS=Homo sapiens GN=COL4A2 PE=4 SV=1	A0A024RDW8,P08572	COL4A2	167558	2	2	2	IAVQPGTVGPQGR	K	R	0.991	30.1	25	14.9	30.1	0	1	0	0	2	1279.71	2181.54	8276060	1397	1409
Mudpit_Aged_L3_4Left_IAF	Collagen, type IV, alpha 2, isoform CRA_a OS=Homo sapiens GN=COL4A2 PE=4 SV=1	A0A024RDW8,P08572	COL4A2	167558	2	2	2	LWSGYSLLYFEGQEK	K	A	0.997	79	27.1	17.9	79	0	1	0	0	2	1819.89	8407.27	1442840	1511	1525
Mudpit_Aged_L3_4Left_IAF	cDNA, FLJ96669, highly similar to Homo sapiens secreted protein, acidic, cysteine-rich (osteonectin)(SPARC), mRNA OS=Homo sapiens PE=2 SV=1	B2RDL6,B4DRV4,D3DQH8,P09486	SPARC	34631.9	7	7	7	DEDNNLLTEK	R	Q	0.991	29	25	14.8	29	0	1	0	0	2	1190.55	2675.71	2918380	182	191
Mudpit_Aged_L3_4Left_IAF	cDNA, FLJ96669, highly similar to Homo sapiens secreted protein, acidic, cysteine-rich (osteonectin)(SPARC), mRNA OS=Homo sapiens PE=2 SV=1	B2RDL6,B4DRV4,D3DQH8,P09486	SPARC	34631.9	7	7	7	DIDKDLVI	K	-	0.99	35.4	27.4	15.2	35.4	0	1	0	0	2	930.514	5991.71	6590470	296	303
Mudpit_Aged_L3_4Left_IAF	cDNA, FLJ96669, highly similar to Homo sapiens secreted protein, acidic, cysteine-rich (osteonectin)(SPARC), mRNA OS=Homo sapiens PE=2 SV=1	B2RDL6,B4DRV4,D3DQH8,P09486	SPARC	34631.9	7	7	7	LEAGDHPVELLAR	R	D	0.982	37.8	26.8	15.4	37.8	0	0	1	0	2	1419.76	3862.05	9251780	206	218
Mudpit_Aged_L3_4Left_IAF	cDNA, FLJ96669, highly similar to Homo sapiens secreted protein, acidic, cysteine-rich (osteonectin)(SPARC), mRNA OS=Homo sapiens PE=2 SV=1	B2RDL6,B4DRV4,D3DQH8,P09486	SPARC	34631.9	7	7	7	NVLVTLYER	K	D	0.984	29.8	25.9	14.9	29.8	0	1	0	0	2	1106.62	5107.71	17600000	173	181
Mudpit_Aged_L3_4Left_IAF	cDNA, FLJ96669, highly similar to Homo sapiens secreted protein, acidic, cysteine-rich (osteonectin)(SPARC), mRNA OS=Homo sapiens PE=2 SV=1	B2RDL6,B4DRV4,D3DQH8,P09486	SPARC	34631.9	7	7	7	NVLVTLYERDEDNNLLTEK	K	Q	0.997	45.3	26.6	15.8	45.3	0	1	0	0	2	2278.16	6553.09	2357210	173	191
Mudpit_Aged_L3_4Left_IAF	cDNA, FLJ96669, highly similar to Homo sapiens secreted protein, acidic, cysteine-rich (osteonectin)(SPARC), mRNA OS=Homo sapiens PE=2 SV=1	B2RDL6,B4DRV4,D3DQH8,P09486	SPARC	34631.9	7	7	7	NYNMYIFPVHWQFGQLDQHPIDGYLSHTELAPLR	K	A	0.966	55.7	25	16.5	55.7	0	0	0	0	2	4115.99	8863.73	9580430	223	256
Mudpit_Aged_L3_4Left_IAF	cDNA, FLJ96669, highly similar to Homo sapiens secreted protein, acidic, cysteine-rich (osteonectin)(SPARC), mRNA OS=Homo sapiens PE=2 SV=1	B2RDL6,B4DRV4,D3DQH8,P09486	SPARC	34631.9	7	7	7	RLEAGDHPVELLAR	K	D	0.949	37.3	27.6	15.3	37.3	0	0	0	1	2	1575.86	2951.13	5639280	205	218
Mudpit_Aged_L3_4Left_IAF	Cadherin-related family member 2 OS=Homo sapiens GN=CDHR2 PE=1 SV=2	Q9BYE9	CDHR2	141542	2	2	2	EEDPGVLVGVVK	K	A	0.997	35.8	25	15.2	35.8	0	1	0	0	2	1240.68	5411.4	6246850	706	717
Mudpit_Aged_L3_4Left_IAF	Cadherin-related family member 2 OS=Homo sapiens GN=CDHR2 PE=1 SV=2	Q9BYE9	CDHR2	141542	2	2	2	LASALDYETLYTFK	K	V	0.997	73.2	27.6	60.4	30.3	0	1	0	0	2	1634.83	7687	4194500	81	94
Mudpit_Aged_L3_4Left_IAF	Putative uncharacterized protein DKFZp686I04196 (Fragment) OS=Homo sapiens GN=DKFZp686I04196 PE=2 SV=1	Q6N093	DKFZp686I04196	46059.4	5	9	58	EPQVYTLPPSREEMTK	R	N	0.997	53.7	31.5	16.4	53.7	0	10	0	0	2	1904.94	3802.77	88100000	315	330
Mudpit_Aged_L3_4Left_IAF	Putative uncharacterized protein DKFZp686I04196 (Fragment) OS=Homo sapiens GN=DKFZp686I04196 PE=2 SV=1	Q6N093	DKFZp686I04196	46059.4	5	9	58	FDPWGQGTLVTVSSASTK	K	G	0.997	100	27.1	19.3	100	0	2	0	0	2	1880.94	6959.05	9133620	78	95
Mudpit_Aged_L3_4Left_IAF	Putative uncharacterized protein DKFZp686I04196 (Fragment) OS=Homo sapiens GN=DKFZp686I04196 PE=2 SV=1	Q6N093	DKFZp686I04196	46059.4	5	9	58	GLPAPIEK	K	T	0.99	34.2	25	15.1	34.2	0	5	0	0	2	824.488	2127.45	93600000	297	304
Mudpit_Aged_L3_4Left_IAF	Putative uncharacterized protein DKFZp686I04196 (Fragment) OS=Homo sapiens GN=DKFZp686I04196 PE=2 SV=1	Q6N093	DKFZp686I04196	46059.4	5	9	58	STSESTAALGCLVK	R	D	0.997	43.5	25.5	15.7	43.5	0	1	0	0	2	1424.69	4914.07	21300000	108	121
Mudpit_Aged_L3_4Left_IAF	Putative uncharacterized protein DKFZp686I04196 (Fragment) OS=Homo sapiens GN=DKFZp686I04196 PE=2 SV=1	Q6N093	DKFZp686I04196	46059.4	5	9	58	TTPPMLDSDGSFFLYSK	K	L	0.997	82	25	18.1	82	0	36	12	0	2	1905.89	7557.28	665000000	363	379
Mudpit_Aged_L3_4Left_IAF	Putative uncharacterized protein DKFZp686I04196 (Fragment) OS=Homo sapiens GN=DKFZp686I04196 PE=2 SV=1	Q6N093	DKFZp686I04196	46059.4	5	9	58	VVSVLTVVHQDWLNGK	R	E	0.997	100	25	19.3	100	0	1	1	0	2	1793.99	7099.11	16000000	272	287
Mudpit_Aged_L3_4Left_IAF	Spondin-2 OS=Homo sapiens GN=SPON2 PE=1 SV=3	Q9BUD6	SPON2	35846.4	4	5	9	EIEAAGEALQSVHEVFSAPAVPSGTGQTSAELEVQR	K	R	0.997	121	25	20.5	121	0	0	3	2	2	3694.82	8109.89	11100000	109	144
Mudpit_Aged_L3_4Left_IAF	Spondin-2 OS=Homo sapiens GN=SPON2 PE=1 SV=3	Q9BUD6	SPON2	35846.4	4	5	9	GEAWALMK	R	E	0.963	26.8	27	14.7	26.8	0	1	0	0	2	905.455	4417.62	8215970	101	108
Mudpit_Aged_L3_4Left_IAF	Spondin-2 OS=Homo sapiens GN=SPON2 PE=1 SV=3	Q9BUD6	SPON2	35846.4	4	5	9	WSQTAFPK	K	Q	0.99	35.3	27.5	15.2	35.3	0	1	0	0	2	964.489	2790.53	2959980	51	58
Mudpit_Aged_L3_4Left_IAF	Spondin-2 OS=Homo sapiens GN=SPON2 PE=1 SV=3	Q9BUD6	SPON2	35846.4	4	5	9	YSITFTGK	K	W	0.99	30.3	26.6	14.9	30.3	0	2	0	0	2	916.477	3612.3	14100000	43	50
Mudpit_Aged_L3_4Left_IAF	Hyaluronidase OS=Homo sapiens GN=HYAL1 PE=2 SV=1	A0A024R2X3,B3KUI5,Q12794	HYAL1	48368.4	3	3	4	ALVQAQHPDWPAPQVEAVAQDQFQGAAR	R	A	0.997	87.3	25.5	18.5	87.3	0	0	2	0	2	3028.5	6888.66	7186160	153	180
Mudpit_Aged_L3_4Left_IAF	Hyaluronidase OS=Homo sapiens GN=HYAL1 PE=2 SV=1	A0A024R2X3,B3KUI5,Q12794	HYAL1	48368.4	3	3	4	ALYPSIYMPAVLEGTGK	R	S	0.997	38	27.1	15.4	38	0	1	0	0	2	1809.95	8420.96	4172470	241	257
Mudpit_Aged_L3_4Left_IAF	Hyaluronidase OS=Homo sapiens GN=HYAL1 PE=2 SV=1	A0A024R2X3,B3KUI5,Q12794	HYAL1	48368.4	3	3	4	AQNDQLGWLWGQSR	R	A	0.997	70.9	26.1	17.4	70.9	0	1	0	0	2	1658.8	7407.16	5101820	227	240
Mudpit_Aged_L3_4Left_IAF	Ig mu chain C region OS=Homo sapiens GN=IGHM PE=1 SV=3	P01871	IGHM	49305.7	15	26	130	DGFFGNPR	R	K	0.99	50.2	25	16.1	50.2	0	5	0	0	2	909.421	3784.43	156000000	121	128
Mudpit_Aged_L3_4Left_IAF	Ig mu chain C region OS=Homo sapiens GN=IGHM PE=1 SV=3	P01871	IGHM	49305.7	15	26	130	DVMQGTDEHVVCK	K	V	0.997	61.9	25	16.9	61.9	0	2	2	0	2	1534.65	1778.48	18300000	77	89
Mudpit_Aged_L3_4Left_IAF	Ig mu chain C region OS=Homo sapiens GN=IGHM PE=1 SV=3	P01871	IGHM	49305.7	15	26	130	EGKQVGSGVTTDQVQAEAK	R	E	0.997	66.6	26.7	17.2	66.6	0	0	1	0	2	1931.97	1353.28	5777140	151	169
Mudpit_Aged_L3_4Left_IAF	Ig mu chain C region OS=Homo sapiens GN=IGHM PE=1 SV=3	P01871	IGHM	49305.7	15	26	130	ESGPTTYK	K	V	0.99	62.3	25	28.9	50.3	0	1	0	0	2	882.42	1180.03	3515440	170	177
Mudpit_Aged_L3_4Left_IAF	Ig mu chain C region OS=Homo sapiens GN=IGHM PE=1 SV=3	P01871	IGHM	49305.7	15	26	130	FTCTVTHTDLPSPLK	R	Q	0.997	92.9	27.1	18.8	92.9	0	1	2	0	2	1717.85	5206.67	16600000	301	315
Mudpit_Aged_L3_4Left_IAF	Ig mu chain C region OS=Homo sapiens GN=IGHM PE=1 SV=3	P01871	IGHM	49305.7	15	26	130	GVALHRPDVYLLPPAR	K	E	0.997	59.4	25	16.7	59.4	0	2	1	0	2	1774.01	4718.1	110000000	323	338
Mudpit_Aged_L3_4Left_IAF	Ig mu chain C region OS=Homo sapiens GN=IGHM PE=1 SV=3	P01871	IGHM	49305.7	15	26	130	LICQATGFSPR	K	Q	0.997	53	26.1	16.3	53	0	3	0	0	2	1250.62	3941.69	41600000	132	142
Mudpit_Aged_L3_4Left_IAF	Ig mu chain C region OS=Homo sapiens GN=IGHM PE=1 SV=3	P01871	IGHM	49305.7	15	26	130	NVPLPVIAELPPK	K	V	0.997	72.4	25	17.5	72.4	0	24	18	0	2	1386.84	7214.66	3000000000	100	112
Mudpit_Aged_L3_4Left_IAF	Ig mu chain C region OS=Homo sapiens GN=IGHM PE=1 SV=3	P01871	IGHM	49305.7	15	26	130	QIQVSWLR	R	E	0.99	38	28.5	37	16.4	0	5	0	0	2	1029.58	5301.52	98900000	143	150
Mudpit_Aged_L3_4Left_IAF	Ig mu chain C region OS=Homo sapiens GN=IGHM PE=1 SV=3	P01871	IGHM	49305.7	15	26	130	QVGSGVTTDQVQAEAK	K	E	0.997	130	26.3	21.1	130	0	15	2	0	2	1617.81	1910.18	1500000000	154	169
Mudpit_Aged_L3_4Left_IAF	Ig mu chain C region OS=Homo sapiens GN=IGHM PE=1 SV=3	P01871	IGHM	49305.7	15	26	130	VSVFVPPR	K	D	0.99	46.6	27.7	15.9	46.6	0	8	0	0	2	900.53	3618.43	1120000000	113	120
Mudpit_Aged_L3_4Left_IAF	Ig mu chain C region OS=Homo sapiens GN=IGHM PE=1 SV=3	P01871	IGHM	49305.7	15	26	130	VTSTLTIK	K	E	0.99	39	25	15.4	39	0	2	0	0	2	862.524	1803.64	7681090	178	185
Mudpit_Aged_L3_4Left_IAF	Ig mu chain C region OS=Homo sapiens GN=IGHM PE=1 SV=3	P01871	IGHM	49305.7	15	26	130	YAATSQVLLPSK	K	D	0.997	95	25.5	18.9	95	0	8	0	0	2	1277.71	3903.56	52800000	65	76
Mudpit_Aged_L3_4Left_IAF	Ig mu chain C region OS=Homo sapiens GN=IGHM PE=1 SV=3	P01871	IGHM	49305.7	15	26	130	YFAHSILTVSEEEWNTGETYTCVVAHEALPNR	?	?	0.997	105	25	19.6	105	0	0	5	5	2	3724.72	8502.69	73800000	0	0
Mudpit_Aged_L3_4Left_IAF	Ig mu chain C region OS=Homo sapiens GN=IGHM PE=1 SV=3	P01871	IGHM	49305.7	15	26	130	YVTSAPMPEPQAPGR	K	Y	0.997	67.2	26	17.2	67.2	0	14	4	0	2	1600.78	2822.72	315000000	377	391
Mudpit_Aged_L3_4Left_IAF	Thrombospondin 1, isoform CRA_a OS=Homo sapiens GN=THBS1 PE=4 SV=1	A0A024R9Q1,P07996	THBS1	129382	24	35	118	AGTLDLSLTVQGK	K	Q	0.997	114	26.4	20.1	114	0	6	0	0	2	1302.73	5472.73	135000000	125	137
Mudpit_Aged_L3_4Left_IAF	Thrombospondin 1, isoform CRA_a OS=Homo sapiens GN=THBS1 PE=4 SV=1	A0A024R9Q1,P07996	THBS1	129382	24	35	118	AQGYSGLSVK	R	V	0.99	29.2	26.1	14.8	29.2	0	1	0	0	2	1009.53	1798.74	17000000	1055	1064
Mudpit_Aged_L3_4Left_IAF	Thrombospondin 1, isoform CRA_a OS=Homo sapiens GN=THBS1 PE=4 SV=1	A0A024R9Q1,P07996	THBS1	129382	24	35	118	DDDYAGFVFGYQSSSR	R	F	0.997	71.2	25	17.4	71.2	0	4	1	0	2	1813.77	7736.01	18200000	1019	1034
Mudpit_Aged_L3_4Left_IAF	Thrombospondin 1, isoform CRA_a OS=Homo sapiens GN=THBS1 PE=4 SV=1	A0A024R9Q1,P07996	THBS1	129382	24	35	118	DDFDHDSVPDIDDICPENVDISETDFR	K	R	0.996	85.1	25	18.3	85.1	0	0	1	0	2	3181.31	8700.97	7673240	932	958
Mudpit_Aged_L3_4Left_IAF	Thrombospondin 1, isoform CRA_a OS=Homo sapiens GN=THBS1 PE=4 SV=1	A0A024R9Q1,P07996	THBS1	129382	24	35	118	DHSGQVFSVVSNGK	K	A	0.997	72.4	25.8	17.5	72.4	0	1	1	0	2	1460.71	2709.25	28800000	111	124
Mudpit_Aged_L3_4Left_IAF	Thrombospondin 1, isoform CRA_a OS=Homo sapiens GN=THBS1 PE=4 SV=1	A0A024R9Q1,P07996	THBS1	129382	24	35	118	FQDLVDAVR	K	A	0.997	57.9	27.9	19	55.5	0	4	0	0	2	1062.56	4882.86	77700000	75	83
Mudpit_Aged_L3_4Left_IAF	Thrombospondin 1, isoform CRA_a OS=Homo sapiens GN=THBS1 PE=4 SV=1	A0A024R9Q1,P07996	THBS1	129382	24	35	118	FQMIPLDPK	R	G	0.997	41.9	28.6	15.6	41.9	0	5	0	0	2	1088.58	5967.72	53400000	960	968
Mudpit_Aged_L3_4Left_IAF	Thrombospondin 1, isoform CRA_a OS=Homo sapiens GN=THBS1 PE=4 SV=1	A0A024R9Q1,P07996	THBS1	129382	24	35	118	FTGSQPFGQGVEHATANK	R	Q	0.997	80.5	27.6	18	80.5	0	4	4	0	2	1875.9	2469.33	61800000	624	641
Mudpit_Aged_L3_4Left_IAF	Thrombospondin 1, isoform CRA_a OS=Homo sapiens GN=THBS1 PE=4 SV=1	A0A024R9Q1,P07996	THBS1	129382	24	35	118	FVFGTTPEDILR	R	N	0.997	65	27.1	17.1	65	0	7	0	0	2	1394.73	7720.9	53100000	217	228
Mudpit_Aged_L3_4Left_IAF	Thrombospondin 1, isoform CRA_a OS=Homo sapiens GN=THBS1 PE=4 SV=1	A0A024R9Q1,P07996	THBS1	129382	24	35	118	GGVNDNFQGVLQNVR	K	F	0.997	96.8	27.3	19.1	96.8	0	3	1	0	2	1616.81	5792.29	32400000	202	216
Mudpit_Aged_L3_4Left_IAF	Thrombospondin 1, isoform CRA_a OS=Homo sapiens GN=THBS1 PE=4 SV=1	A0A024R9Q1,P07996	THBS1	129382	24	35	118	GPDPSSPAFR	K	I	0.997	52	25	16.2	52	0	3	0	0	2	1030.5	1781.05	53800000	51	60
Mudpit_Aged_L3_4Left_IAF	Thrombospondin 1, isoform CRA_a OS=Homo sapiens GN=THBS1 PE=4 SV=1	A0A024R9Q1,P07996	THBS1	129382	24	35	118	GTLLALER	R	K	0.99	47.8	28.3	19.8	43.9	0	4	0	0	2	872.52	3945.68	53000000	102	109
Mudpit_Aged_L3_4Left_IAF	Thrombospondin 1, isoform CRA_a OS=Homo sapiens GN=THBS1 PE=4 SV=1	A0A024R9Q1,P07996	THBS1	129382	24	35	118	GTSQNDPNWVVR	K	H	0.997	75.5	25	21.3	71.9	0	2	0	0	2	1372.66	2844.68	14400000	969	980
Mudpit_Aged_L3_4Left_IAF	Thrombospondin 1, isoform CRA_a OS=Homo sapiens GN=THBS1 PE=4 SV=1	A0A024R9Q1,P07996	THBS1	129382	24	35	118	IEDANLIPPVPDDK	R	F	0.996	36.1	27.5	15.3	36.1	0	3	0	0	2	1535.8	5816.92	39900000	61	74
Mudpit_Aged_L3_4Left_IAF	Thrombospondin 1, isoform CRA_a OS=Homo sapiens GN=THBS1 PE=4 SV=1	A0A024R9Q1,P07996	THBS1	129382	24	35	118	IEDANLIPPVPDDKFQDLVDAVR	R	A	0.997	95.4	25.7	19	95.4	0	3	4	0	2	2579.34	8864.48	129000000	61	83
Mudpit_Aged_L3_4Left_IAF	Thrombospondin 1, isoform CRA_a OS=Homo sapiens GN=THBS1 PE=4 SV=1	A0A024R9Q1,P07996	THBS1	129382	24	35	118	IMADSGPIYDK	K	T	0.997	60.3	25	16.8	60.3	0	14	0	0	2	1225.58	2887.51	109000000	1131	1141
Mudpit_Aged_L3_4Left_IAF	Thrombospondin 1, isoform CRA_a OS=Homo sapiens GN=THBS1 PE=4 SV=1	A0A024R9Q1,P07996	THBS1	129382	24	35	118	IPESGGDNSVFDIFELTGAAR	R	K	0.997	128	29.6	21	128	0	2	1	0	2	2195.06	9078.62	26000000	21	41
Mudpit_Aged_L3_4Left_IAF	Thrombospondin 1, isoform CRA_a OS=Homo sapiens GN=THBS1 PE=4 SV=1	A0A024R9Q1,P07996	THBS1	129382	24	35	118	MENAELDVPIQSVFTR	K	D	0.997	103	26.9	19.5	103	0	6	3	0	2	1864.91	7754.71	197000000	174	189
Mudpit_Aged_L3_4Left_IAF	Thrombospondin 1, isoform CRA_a OS=Homo sapiens GN=THBS1 PE=4 SV=1	A0A024R9Q1,P07996	THBS1	129382	24	35	118	NALWHTGNTPGQVR	R	T	0.996	52.4	27.4	16.3	52.4	0	0	2	0	2	1550.78	2162.16	21400000	1078	1091
Mudpit_Aged_L3_4Left_IAF	Thrombospondin 1, isoform CRA_a OS=Homo sapiens GN=THBS1 PE=4 SV=1	A0A024R9Q1,P07996	THBS1	129382	24	35	118	QHVVSVEEALLATGQWK	K	S	0.997	89.3	25.9	18.6	89.3	0	5	6	0	2	1895	6778.62	132000000	138	154
Mudpit_Aged_L3_4Left_IAF	Thrombospondin 1, isoform CRA_a OS=Homo sapiens GN=THBS1 PE=4 SV=1	A0A024R9Q1,P07996	THBS1	129382	24	35	118	QVTQSYWDTNPTR	K	A	0.997	102	25	21.3	100	0	6	0	0	2	1595.74	3684.06	82700000	1042	1054
Mudpit_Aged_L3_4Left_IAF	Thrombospondin 1, isoform CRA_a OS=Homo sapiens GN=THBS1 PE=4 SV=1	A0A024R9Q1,P07996	THBS1	129382	24	35	118	SITLFVQEDR	K	A	0.997	48.9	27.3	16.1	48.9	0	3	0	0	2	1207.63	5304.36	88300000	155	164
Mudpit_Aged_L3_4Left_IAF	Thrombospondin 1, isoform CRA_a OS=Homo sapiens GN=THBS1 PE=4 SV=1	A0A024R9Q1,P07996	THBS1	129382	24	35	118	TIVTTLQDSIR	R	K	0.997	67.9	26.8	17.2	67.9	0	7	0	0	2	1246.7	5581.14	68500000	289	299
Mudpit_Aged_L3_4Left_IAF	Thrombospondin 1, isoform CRA_a OS=Homo sapiens GN=THBS1 PE=4 SV=1	A0A024R9Q1,P07996	THBS1	129382	24	35	118	VTEENKELANELR	K	R	0.997	119	33.7	31.3	109	0	1	0	0	2	1544.79	1914.23	11300000	301	313
Mudpit_Aged_L3_4Left_IAF	GCT-A4 light chain variable region (Fragment) OS=Homo sapiens PE=2 SV=1	A0A0X9T7V9		11845.8	2	2	3	DIVMTQSPGTLSLSPGER	-	A	0.997	60.5	25.4	16.8	60.5	0	1	0	0	2	1887.95	5132.59	4185720	1	18
Mudpit_Aged_L3_4Left_IAF	GCT-A4 light chain variable region (Fragment) OS=Homo sapiens PE=2 SV=1	A0A0X9T7V9		11845.8	2	2	3	LLIYGASTR	R	A	0.997	39	25	16.5	38	0	2	0	0	2	993.573	3540.65	42700000	47	55
Mudpit_Aged_L3_4Left_IAF	Ig gamma-4 chain C region OS=Homo sapiens GN=IGHG4 PE=1 SV=1	A0A286YFJ8_HUMAN,P01861	IGHG4	35939.5	2	4	25	EPQVYTLPPSQEEMTK	R	N	0.997	68.7	25.6	17.3	68.7	0	12	0	0	2	1876.9	4499.51	154000000	225	240
Mudpit_Aged_L3_4Left_IAF	Ig gamma-4 chain C region OS=Homo sapiens GN=IGHG4 PE=1 SV=1	A0A286YFJ8_HUMAN,P01861	IGHG4	35939.5	2	4	25	TTPPVLDSDGSFFLYSR	K	L	0.997	79.5	26.5	18	79.5	0	9	4	0	2	1901.93	8044.04	215000000	273	289
Mudpit_Aged_L3_4Left_IAF	Annexin A4 OS=Homo sapiens GN=ANXA4 PE=1 SV=4	P09525,Q6LES2	ANXA4	35884.3	8	10	14	AEIDMLDIR	R	A	0.997	58.5	28.4	19.1	56	0	1	0	0	2	1075.55	6000.09	8414740	276	284
Mudpit_Aged_L3_4Left_IAF	Annexin A4 OS=Homo sapiens GN=ANXA4 PE=1 SV=4	P09525,Q6LES2	ANXA4	35884.3	8	10	14	GLGTDEDAIISVLAYR	K	N	0.997	103	27.4	19.4	103	0	2	1	0	2	1692.88	8871.12	85800000	29	44
Mudpit_Aged_L3_4Left_IAF	Annexin A4 OS=Homo sapiens GN=ANXA4 PE=1 SV=4	P09525,Q6LES2	ANXA4	35884.3	8	10	14	ISQTYQQQYGR	R	S	0.997	58.7	26.2	16.7	58.7	0	1	0	0	2	1371.67	1408.01	10400000	124	134
Mudpit_Aged_L3_4Left_IAF	Annexin A4 OS=Homo sapiens GN=ANXA4 PE=1 SV=4	P09525,Q6LES2	ANXA4	35884.3	8	10	14	NHLLHVFDEYK	R	R	0.983	44.1	25.9	15.8	44.1	0	0	1	0	2	1414.71	3703.01	5280200	203	213
Mudpit_Aged_L3_4Left_IAF	Annexin A4 OS=Homo sapiens GN=ANXA4 PE=1 SV=4	P09525,Q6LES2	ANXA4	35884.3	8	10	14	QDAQDLYEAGEK	R	K	0.997	89.8	25	18.6	89.8	0	1	0	0	2	1366.61	2332.26	5146130	173	184
Mudpit_Aged_L3_4Left_IAF	Annexin A4 OS=Homo sapiens GN=ANXA4 PE=1 SV=4	P09525,Q6LES2	ANXA4	35884.3	8	10	14	SDTSFMFQR	R	V	0.997	74.7	25	17.7	74.7	0	3	0	0	2	1134.49	2971.39	28000000	142	150
Mudpit_Aged_L3_4Left_IAF	Annexin A4 OS=Homo sapiens GN=ANXA4 PE=1 SV=4	P09525,Q6LES2	ANXA4	35884.3	8	10	14	SETSGSFEDALLAIVK	K	C	0.997	108	28	19.7	108	0	3	0	0	2	1666.85	8997.1	16600000	226	241
Mudpit_Aged_L3_4Left_IAF	Annexin A4 OS=Homo sapiens GN=ANXA4 PE=1 SV=4	P09525,Q6LES2	ANXA4	35884.3	8	10	14	VLVSLSAGGR	R	D	0.997	36.3	25.9	27.2	24.4	0	1	0	0	2	958.568	3135.64	5288930	151	160
Mudpit_Aged_L3_4Left_IAF	Serpin peptidase inhibitor, clade A (Alpha-1 antiproteinase, antitrypsin), member 10, isoform CRA_b OS=Homo sapiens GN=SERPINA10 PE=3 SV=1	A0A024R6I6,B2RBZ5,G3V2W1,Q9UK55	SERPINA10	50708.7	6	7	9	ETSNFGFSLLR	K	K	0.997	70.2	25.1	17.4	70.2	0	1	0	0	2	1270.64	6984.34	9430780	78	88
Mudpit_Aged_L3_4Left_IAF	Serpin peptidase inhibitor, clade A (Alpha-1 antiproteinase, antitrypsin), member 10, isoform CRA_b OS=Homo sapiens GN=SERPINA10 PE=3 SV=1	A0A024R6I6,B2RBZ5,G3V2W1,Q9UK55	SERPINA10	50708.7	6	7	9	IFSPFADLSELSATGR	R	N	0.997	90.4	26.4	18.6	90.4	0	1	1	0	2	1710.87	8900.53	45600000	360	375
Mudpit_Aged_L3_4Left_IAF	Serpin peptidase inhibitor, clade A (Alpha-1 antiproteinase, antitrypsin), member 10, isoform CRA_b OS=Homo sapiens GN=SERPINA10 PE=3 SV=1	A0A024R6I6,B2RBZ5,G3V2W1,Q9UK55	SERPINA10	50708.7	6	7	9	LFDEINPETK	K	L	0.99	31.2	26.1	14.9	31.2	0	2	0	0	2	1205.61	4680.64	22000000	220	229
Mudpit_Aged_L3_4Left_IAF	Serpin peptidase inhibitor, clade A (Alpha-1 antiproteinase, antitrypsin), member 10, isoform CRA_b OS=Homo sapiens GN=SERPINA10 PE=3 SV=1	A0A024R6I6,B2RBZ5,G3V2W1,Q9UK55	SERPINA10	50708.7	6	7	9	NMEVFFPK	R	F	0.951	32.5	25	15	32.5	0	1	0	0	2	1011.5	5586.66	3290570	332	339
Mudpit_Aged_L3_4Left_IAF	Serpin peptidase inhibitor, clade A (Alpha-1 antiproteinase, antitrypsin), member 10, isoform CRA_b OS=Homo sapiens GN=SERPINA10 PE=3 SV=1	A0A024R6I6,B2RBZ5,G3V2W1,Q9UK55	SERPINA10	50708.7	6	7	9	TVIEVDER	R	G	0.99	50.5	28.6	41.2	25.5	0	1	0	0	2	960.5	1888.68	11200000	386	393
Mudpit_Aged_L3_4Left_IAF	Serpin peptidase inhibitor, clade A (Alpha-1 antiproteinase, antitrypsin), member 10, isoform CRA_b OS=Homo sapiens GN=SERPINA10 PE=3 SV=1	A0A024R6I6,B2RBZ5,G3V2W1,Q9UK55	SERPINA10	50708.7	6	7	9	WLTPFDPVFTEVDTFHLDK	K	Y	0.997	76	32.7	17.8	76	0	0	2	0	2	2307.13	9075.55	16500000	242	260
Mudpit_Aged_L3_4Left_IAF	Procollagen C-endopeptidase enhancer OS=Homo sapiens GN=PCOLCE PE=4 SV=1	A4D2D2,Q15113	PCOLCE	47972.5	6	10	18	EPGEGLAVTVSLIGAYK	R	T	0.997	82.5	26.4	18.2	82.5	0	2	0	0	2	1703.92	8126	12300000	349	365
Mudpit_Aged_L3_4Left_IAF	Procollagen C-endopeptidase enhancer OS=Homo sapiens GN=PCOLCE PE=4 SV=1	A4D2D2,Q15113	PCOLCE	47972.5	6	10	18	GESGYVASEGFPNLYPPNK	K	E	0.997	66.1	25	17.1	66.1	0	2	1	0	2	2025.96	6374.59	17200000	43	61
Mudpit_Aged_L3_4Left_IAF	Procollagen C-endopeptidase enhancer OS=Homo sapiens GN=PCOLCE PE=4 SV=1	A4D2D2,Q15113	PCOLCE	47972.5	6	10	18	GVSYLLMGQVEENR	K	G	0.997	75.9	27.2	17.7	75.9	0	2	1	0	2	1610.78	6117.1	41700000	395	408
Mudpit_Aged_L3_4Left_IAF	Procollagen C-endopeptidase enhancer OS=Homo sapiens GN=PCOLCE PE=4 SV=1	A4D2D2,Q15113	PCOLCE	47972.5	6	10	18	TGGLDLPSPPTGASLK	K	F	0.997	60.4	27.2	16.8	60.4	0	5	0	0	2	1510.81	5838.22	88900000	366	381
Mudpit_Aged_L3_4Left_IAF	Procollagen C-endopeptidase enhancer OS=Homo sapiens GN=PCOLCE PE=4 SV=1	A4D2D2,Q15113	PCOLCE	47972.5	6	10	18	YDALEVFAGSGTSGQR	R	L	0.997	79.8	25.1	18	79.8	0	3	1	0	2	1657.78	6142.79	29600000	92	107
Mudpit_Aged_L3_4Left_IAF	Procollagen C-endopeptidase enhancer OS=Homo sapiens GN=PCOLCE PE=4 SV=1	A4D2D2,Q15113	PCOLCE	47972.5	6	10	18	YDSVSVFNGAVSDDSR	R	R	0.997	79.8	25	18	79.8	0	1	0	0	2	1717.77	5321.28	26000000	215	230
Mudpit_Aged_L3_4Left_IAF	N-acetylmuramoyl-L-alanine amidase OS=Homo sapiens GN=PGLYRP2 PE=1 SV=1	Q96PD5	PGLYRP2	62217.9	5	8	23	DGSPDVTTADIGANTPDATK	R	G	0.997	121	25	20.6	121	0	4	2	0	2	1945.9	4678.43	26700000	175	194
Mudpit_Aged_L3_4Left_IAF	N-acetylmuramoyl-L-alanine amidase OS=Homo sapiens GN=PGLYRP2 PE=1 SV=1	Q96PD5	PGLYRP2	62217.9	5	8	23	EYGVVLAPDGSTVAVEPLLAGLEAGLQGR	K	R	0.997	101	25	19.3	101	0	1	2	0	2	2881.53	9233.89	50500000	107	135
Mudpit_Aged_L3_4Left_IAF	N-acetylmuramoyl-L-alanine amidase OS=Homo sapiens GN=PGLYRP2 PE=1 SV=1	Q96PD5	PGLYRP2	62217.9	5	8	23	TFTLLDPK	R	A	0.99	44.7	27.1	15.8	44.7	0	3	0	0	2	934.525	5054.09	12600000	257	264
Mudpit_Aged_L3_4Left_IAF	N-acetylmuramoyl-L-alanine amidase OS=Homo sapiens GN=PGLYRP2 PE=1 SV=1	Q96PD5	PGLYRP2	62217.9	5	8	23	VINLPLDSMAAPWETGDTFPDVVAIAPDVR	R	A	0.997	144	25.2	22	144	0	0	4	0	2	3225.61	9158.1	31900000	137	166
Mudpit_Aged_L3_4Left_IAF	N-acetylmuramoyl-L-alanine amidase OS=Homo sapiens GN=PGLYRP2 PE=1 SV=1	Q96PD5	PGLYRP2	62217.9	5	8	23	YHQDTQGWGDIGYSFVVGSDGYVYEGR	R	G	0.997	118	25	20.3	118	0	0	7	0	2	3055.35	8325.25	16900000	435	461
Mudpit_Aged_L3_4Left_IAF	Polymeric immunoglobulin receptor OS=Homo sapiens GN=PIGR PE=1 SV=4	P01833	PIGR	83283.4	4	5	6	DGSFSVVITGLR	K	K	0.997	42.4	26.8	15.7	42.4	0	2	0	0	2	1250.67	7215.34	12100000	305	316
Mudpit_Aged_L3_4Left_IAF	Polymeric immunoglobulin receptor OS=Homo sapiens GN=PIGR PE=1 SV=4	P01833	PIGR	83283.4	4	5	6	ILLNPQDK	R	D	0.959	23.5	25	19.1	18.9	0	1	0	0	2	940.546	2174.29	7154330	297	304
Mudpit_Aged_L3_4Left_IAF	Polymeric immunoglobulin receptor OS=Homo sapiens GN=PIGR PE=1 SV=4	P01833	PIGR	83283.4	4	5	6	NADLQVLKPEPELVYEDLR	K	G	0.997	66.9	25.7	17.2	66.9	0	1	1	0	2	2241.18	7177.73	30300000	232	250
Mudpit_Aged_L3_4Left_IAF	Polymeric immunoglobulin receptor OS=Homo sapiens GN=PIGR PE=1 SV=4	P01833	PIGR	83283.4	4	5	6	VYTVDLGR	K	T	0.99	41.5	26.8	31.3	25.8	0	1	0	0	2	922.499	3219.93	28000000	139	146
Mudpit_Aged_L3_4Left_IAF	Laminin, gamma 1 (Formerly LAMB2), isoform CRA_a OS=Homo sapiens GN=LAMC1 PE=4 SV=1	A0A024R972,P11047	LAMC1	177601	7	9	13	DGFFGNPLAPNPADK	K	C	0.997	35.4	25	15.2	35.4	0	1	0	0	2	1559.75	7163.77	10900000	866	880
Mudpit_Aged_L3_4Left_IAF	Laminin, gamma 1 (Formerly LAMB2), isoform CRA_a OS=Homo sapiens GN=LAMC1 PE=4 SV=1	A0A024R972,P11047	LAMC1	177601	7	9	13	DTLQEANDILNNLK	R	D	0.997	76.9	26.8	17.8	76.9	0	1	1	0	2	1600.82	8267.01	8644970	1358	1371
Mudpit_Aged_L3_4Left_IAF	Laminin, gamma 1 (Formerly LAMB2), isoform CRA_a OS=Homo sapiens GN=LAMC1 PE=4 SV=1	A0A024R972,P11047	LAMC1	177601	7	9	13	LSAEDLVLEGAGLR	R	V	0.997	76.8	26.5	18.9	75.7	0	2	1	0	2	1442.79	7936.63	16500000	590	603
Mudpit_Aged_L3_4Left_IAF	Laminin, gamma 1 (Formerly LAMB2), isoform CRA_a OS=Homo sapiens GN=LAMC1 PE=4 SV=1	A0A024R972,P11047	LAMC1	177601	7	9	13	NTIEETGNLAEQAR	R	A	0.997	84.9	25.7	18.3	84.9	0	1	0	0	2	1545.75	3017.28	2774530	1122	1135
Mudpit_Aged_L3_4Left_IAF	Laminin, gamma 1 (Formerly LAMB2), isoform CRA_a OS=Homo sapiens GN=LAMC1 PE=4 SV=1	A0A024R972,P11047	LAMC1	177601	7	9	13	QDIAVISDSYFPR	R	Y	0.997	75	27	17.7	75	0	4	0	0	2	1510.75	6676.83	37500000	545	557
Mudpit_Aged_L3_4Left_IAF	Laminin, gamma 1 (Formerly LAMB2), isoform CRA_a OS=Homo sapiens GN=LAMC1 PE=4 SV=1	A0A024R972,P11047	LAMC1	177601	7	9	13	SYYYAISDFAVGGR	K	C	0.984	27.1	25	14.7	27.1	0	1	0	0	2	1568.74	7004.97	3993030	272	285
Mudpit_Aged_L3_4Left_IAF	Laminin, gamma 1 (Formerly LAMB2), isoform CRA_a OS=Homo sapiens GN=LAMC1 PE=4 SV=1	A0A024R972,P11047	LAMC1	177601	7	9	13	VSVPLIAQGNSYPSETTVK	R	Y	0.997	69.6	26.4	17.4	69.6	0	1	0	0	2	1990.05	5820.15	3304980	604	622
Mudpit_Aged_L3_4Left_IAF	Myosin-7 OS=Homo sapiens GN=MYH7 PE=1 SV=5	P12883	MYH7	223104	4	4	4	LASADIETYLLEK	K	S	0.997	54.4	26.7	16.4	54.4	0	1	0	0	2	1465.78	7191.22	6276010	258	270
Mudpit_Aged_L3_4Left_IAF	Myosin-7 OS=Homo sapiens GN=MYH7 PE=1 SV=5	P12883	MYH7	223104	4	4	4	LELDDVTSNMEQIIK	K	A	0.997	90.1	27.5	18.6	90.1	0	1	0	0	2	1747.88	8437.44	4141090	1226	1240
Mudpit_Aged_L3_4Left_IAF	Myosin-7 OS=Homo sapiens GN=MYH7 PE=1 SV=5	P12883	MYH7	223104	4	4	4	LTYTQQLEDLKR	K	Q	0.968	34.6	27.2	15.2	34.6	0	0	1	0	2	1507.81	3962.99	5301420	1306	1317
Mudpit_Aged_L3_4Left_IAF	Myosin-7 OS=Homo sapiens GN=MYH7 PE=1 SV=5	P12883	MYH7	223104	4	4	4	SLSTELFK	R	L	0.99	39.4	26.3	15.5	39.4	0	1	0	0	2	924.504	4425.08	9834180	1476	1483
Mudpit_Aged_L3_4Left_IAF	Tropomyosin beta chain OS=Homo sapiens GN=TPM2 PE=1 SV=1	P07951	TPM2	32851.7	3	3	5	ATDAEADVASLNR	K	R	0.997	73.7	26.1	17.6	73.7	0	1	0	0	2	1332.64	2811.45	3682570	78	90
Mudpit_Aged_L3_4Left_IAF	Tropomyosin beta chain OS=Homo sapiens GN=TPM2 PE=1 SV=1	P07951	TPM2	32851.7	3	3	5	IQLVEEELDR	R	A	0.997	48.4	27.2	16.3	48.2	0	2	0	0	2	1243.65	4924.27	22200000	92	101
Mudpit_Aged_L3_4Left_IAF	Tropomyosin beta chain OS=Homo sapiens GN=TPM2 PE=1 SV=1	P07951	TPM2	32851.7	3	3	5	LVILEGELER	K	S	0.996	32.9	25	15.1	32.9	0	2	0	0	2	1170.67	5673.44	14200000	169	178
Mudpit_Aged_L3_4Left_IAF	Latent-transforming growth factor beta-binding protein 2 OS=Homo sapiens GN=LTBP2 PE=1 SV=1	G3V3X5,G3V511,Q14767,Q6AZ94	LTBP2	195043	3	3	7	ALLEAPLK	R	Q	0.99	42.9	25	15.7	42.9	0	2	0	0	2	854.535	3977.53	20300000	447	454
Mudpit_Aged_L3_4Left_IAF	Latent-transforming growth factor beta-binding protein 2 OS=Homo sapiens GN=LTBP2 PE=1 SV=1	G3V3X5,G3V511,Q14767,Q6AZ94	LTBP2	195043	3	3	7	EQDAPVAGLQPVER	R	A	0.997	65.2	27.5	17.1	65.2	0	2	0	0	2	1508.77	3969.57	17400000	74	87
Mudpit_Aged_L3_4Left_IAF	Latent-transforming growth factor beta-binding protein 2 OS=Homo sapiens GN=LTBP2 PE=1 SV=1	G3V3X5,G3V511,Q14767,Q6AZ94	LTBP2	195043	3	3	7	GAGGQSMSEAPTGDHAPAPTR	R	M	0.997	61.7	25	16.9	61.7	0	0	3	0	2	1994.9	1312.9	14300000	1390	1410
Mudpit_Aged_L3_4Left_IAF	Beta-enolase OS=Homo sapiens GN=ENO3 PE=1 SV=5	P13929	ENO3	46988.2	3	3	3	DATNVGDEGGFAPNILENNEALELLK	K	T	0.997	53.8	29.2	16.4	53.8	0	1	0	0	2	2743.34	9094.46	4962070	203	228
Mudpit_Aged_L3_4Left_IAF	Beta-enolase OS=Homo sapiens GN=ENO3 PE=1 SV=5	P13929	ENO3	46988.2	3	3	3	TAIQAAGYPDK	K	V	0.997	68.9	28.1	17.3	68.9	0	1	0	0	2	1134.58	1711.91	3998940	229	239
Mudpit_Aged_L3_4Left_IAF	Beta-enolase OS=Homo sapiens GN=ENO3 PE=1 SV=5	P13929	ENO3	46988.2	3	3	3	VVIGMDVAASEFYR	K	N	0.997	63.2	25.6	16.9	63.2	0	1	0	0	2	1572.77	5863.14	4797030	240	253
Mudpit_Aged_L3_4Left_IAF	Endoplasmin OS=Homo sapiens GN=HSP90B1 PE=1 SV=1	P14625,Q5CAQ5,V9HWP2	HEL-S-125m,HSP90B1,TRA1	92471.7	13	15	20	EAESSPFVER	K	L	0.997	37.9	25.3	15.4	37.9	0	1	0	0	2	1150.54	2101.73	10300000	548	557
Mudpit_Aged_L3_4Left_IAF	Endoplasmin OS=Homo sapiens GN=HSP90B1 PE=1 SV=1	P14625,Q5CAQ5,V9HWP2	HEL-S-125m,HSP90B1,TRA1	92471.7	13	15	20	EEASDYLELDTIK	K	N	0.997	77.1	25.3	17.8	77.1	0	1	0	0	2	1525.73	6346.02	4621190	253	265
Mudpit_Aged_L3_4Left_IAF	Endoplasmin OS=Homo sapiens GN=HSP90B1 PE=1 SV=1	P14625,Q5CAQ5,V9HWP2	HEL-S-125m,HSP90B1,TRA1	92471.7	13	15	20	EFEPLLNWMK	K	D	0.983	28.5	26.7	14.8	28.5	0	2	0	0	2	1306.65	8593.39	7315350	614	623
Mudpit_Aged_L3_4Left_IAF	Endoplasmin OS=Homo sapiens GN=HSP90B1 PE=1 SV=1	P14625,Q5CAQ5,V9HWP2	HEL-S-125m,HSP90B1,TRA1	92471.7	13	15	20	ELISNASDALDK	R	I	0.997	80.1	26.9	18	80.1	0	2	0	0	2	1275.64	3997.91	9822370	103	114
Mudpit_Aged_L3_4Left_IAF	Endoplasmin OS=Homo sapiens GN=HSP90B1 PE=1 SV=1	P14625,Q5CAQ5,V9HWP2	HEL-S-125m,HSP90B1,TRA1	92471.7	13	15	20	FQSSHHPTDITSLDQYVER	R	M	0.997	85.1	26.7	18.3	85.1	0	1	1	0	2	2260.06	4556.46	16100000	512	530
Mudpit_Aged_L3_4Left_IAF	Endoplasmin OS=Homo sapiens GN=HSP90B1 PE=1 SV=1	P14625,Q5CAQ5,V9HWP2	HEL-S-125m,HSP90B1,TRA1	92471.7	13	15	20	GVVDSDDLPLNVSR	K	E	0.997	80.6	26.9	18	80.6	0	2	0	0	2	1485.75	5704.2	16600000	435	448
Mudpit_Aged_L3_4Left_IAF	Endoplasmin OS=Homo sapiens GN=HSP90B1 PE=1 SV=1	P14625,Q5CAQ5,V9HWP2	HEL-S-125m,HSP90B1,TRA1	92471.7	13	15	20	LIINSLYK	K	N	0.99	40.9	25	16.5	40	0	1	0	0	2	963.587	4915.77	2727510	88	95
Mudpit_Aged_L3_4Left_IAF	Endoplasmin OS=Homo sapiens GN=HSP90B1 PE=1 SV=1	P14625,Q5CAQ5,V9HWP2	HEL-S-125m,HSP90B1,TRA1	92471.7	13	15	20	LISLTDENALSGNEELTVK	R	I	0.997	72.9	27.5	17.6	72.9	0	2	0	0	2	2046.06	6871.13	4926010	117	135
Mudpit_Aged_L3_4Left_IAF	Endoplasmin OS=Homo sapiens GN=HSP90B1 PE=1 SV=1	P14625,Q5CAQ5,V9HWP2	HEL-S-125m,HSP90B1,TRA1	92471.7	13	15	20	LTESPCALVASQYGWSGNMER	R	I	0.997	57.9	25	16.6	57.9	0	1	0	0	2	2357.05	7043.58	776861	640	660
Mudpit_Aged_L3_4Left_IAF	Endoplasmin OS=Homo sapiens GN=HSP90B1 PE=1 SV=1	P14625,Q5CAQ5,V9HWP2	HEL-S-125m,HSP90B1,TRA1	92471.7	13	15	20	NLLHVTDTGVGMTR	K	E	0.997	65.9	25.8	17.1	65.9	0	1	1	0	2	1513.78	4200.89	8898770	143	156
Mudpit_Aged_L3_4Left_IAF	Endoplasmin OS=Homo sapiens GN=HSP90B1 PE=1 SV=1	P14625,Q5CAQ5,V9HWP2	HEL-S-125m,HSP90B1,TRA1	92471.7	13	15	20	SILFVPTSAPR	K	G	0.978	26.9	26.3	25.5	16.1	0	1	0	0	2	1187.68	5771.48	11700000	385	395
Mudpit_Aged_L3_4Left_IAF	Endoplasmin OS=Homo sapiens GN=HSP90B1 PE=1 SV=1	P14625,Q5CAQ5,V9HWP2	HEL-S-125m,HSP90B1,TRA1	92471.7	13	15	20	TDDEVVQREEEAIQLDGLNASQIR	R	E	0.997	72.1	25.2	17.5	72.1	0	0	2	0	2	2728.34	7024.94	8169600	44	67
Mudpit_Aged_L3_4Left_IAF	Endoplasmin OS=Homo sapiens GN=HSP90B1 PE=1 SV=1	P14625,Q5CAQ5,V9HWP2	HEL-S-125m,HSP90B1,TRA1	92471.7	13	15	20	VFITDDFHDMMPK	R	Y	0.949	29.4	25	14.8	29.4	0	0	1	0	2	1595.72	6854.57	3218100	416	428
Mudpit_Aged_L3_4Left_IAF	Serum amyloid P-component OS=Homo sapiens GN=APCS PE=1 SV=2	P02743,V9HWP0	APCS,HEL-S-92n	25387.7	5	5	25	AYSLFSYNTQGR	R	D	0.997	63.9	25.6	17	63.9	0	7	0	0	2	1406.67	5281.24	51500000	65	76
Mudpit_Aged_L3_4Left_IAF	Serum amyloid P-component OS=Homo sapiens GN=APCS PE=1 SV=2	P02743,V9HWP0	APCS,HEL-S-92n	25387.7	5	5	25	DNELLVYK	R	E	0.99	45.5	27.2	15.8	45.5	0	4	0	0	2	993.525	4691.98	99100000	77	84
Mudpit_Aged_L3_4Left_IAF	Serum amyloid P-component OS=Homo sapiens GN=APCS PE=1 SV=2	P02743,V9HWP0	APCS,HEL-S-92n	25387.7	5	5	25	IVLGQEQDSYGGK	K	F	0.997	92.7	26.7	18.8	92.7	0	7	0	0	2	1393.7	2658.65	531000000	150	162
Mudpit_Aged_L3_4Left_IAF	Serum amyloid P-component OS=Homo sapiens GN=APCS PE=1 SV=2	P02743,V9HWP0	APCS,HEL-S-92n	25387.7	5	5	25	QGYFVEAQPK	R	I	0.997	68	25.6	17.3	68	0	4	0	0	2	1166.58	2689.9	97200000	140	149
Mudpit_Aged_L3_4Left_IAF	Serum amyloid P-component OS=Homo sapiens GN=APCS PE=1 SV=2	P02743,V9HWP0	APCS,HEL-S-92n	25387.7	5	5	25	VGEYSLYIGR	R	H	0.997	56.5	26.1	16.5	56.5	0	3	0	0	2	1156.6	5021.6	22500000	87	96
Mudpit_Aged_L3_4Left_IAF	Laminin subunit beta-1 OS=Homo sapiens GN=LAMB1 PE=1 SV=1	G3XAI2,P07942	LAMB1	198035	3	3	4	ELDSLQTEAESLDNTVK	K	E	0.997	79.3	25.6	18	79.3	0	2	0	0	2	1891.91	6498.24	5560090	1284	1300
Mudpit_Aged_L3_4Left_IAF	Laminin subunit beta-1 OS=Homo sapiens GN=LAMB1 PE=1 SV=1	G3XAI2,P07942	LAMB1	198035	3	3	4	QSAEDILLK	K	T	0.977	29	27.7	17.4	26.4	0	1	0	0	2	1016.56	4106.55	3538890	1477	1485
Mudpit_Aged_L3_4Left_IAF	Laminin subunit beta-1 OS=Homo sapiens GN=LAMB1 PE=1 SV=1	G3XAI2,P07942	LAMB1	198035	3	3	4	YSDIEPSTEGEVIFR	R	A	0.997	75.2	25.9	21.4	71.5	0	1	0	0	2	1741.83	6049.05	4596710	194	208
Mudpit_Aged_L3_4Left_IAF	Insulin-like growth factor binding protein 3 isoform b OS=Homo sapiens PE=2 SV=1	A6XNC9,A6XND0,A6XND1,B3KRZ1,B3KTQ0,B3KTS0,B3KVF9,B3KVY6,B3KWK7,B4DN53,B4DP07,H0Y485,H0Y5K2,P17936,Q6ZSD0	IGFBP3	31674.1	4	6	9	EMEDTLNHLK	R	F	0.997	50.4	25	16.2	50.4	0	1	1	0	2	1229.58	2337.64	39700000	216	225
Mudpit_Aged_L3_4Left_IAF	Insulin-like growth factor binding protein 3 isoform b OS=Homo sapiens PE=2 SV=1	A6XNC9,A6XND0,A6XND1,B3KRZ1,B3KTQ0,B3KTS0,B3KVF9,B3KVY6,B3KWK7,B4DN53,B4DP07,H0Y485,H0Y5K2,P17936,Q6ZSD0	IGFBP3	31674.1	4	6	9	FLNVLSPR	K	G	0.96	28.6	26.8	14.8	28.6	0	1	0	0	2	945.552	5006.81	11600000	226	233
Mudpit_Aged_L3_4Left_IAF	Insulin-like growth factor binding protein 3 isoform b OS=Homo sapiens PE=2 SV=1	A6XNC9,A6XND0,A6XND1,B3KRZ1,B3KTQ0,B3KTS0,B3KVF9,B3KVY6,B3KWK7,B4DN53,B4DP07,H0Y485,H0Y5K2,P17936,Q6ZSD0	IGFBP3	31674.1	4	6	9	VDYESQSTDTQNFSSESK	K	R	0.997	75.2	25	17.7	75.2	0	2	2	0	2	2051.87	2782.07	9066020	188	205
Mudpit_Aged_L3_4Left_IAF	Insulin-like growth factor binding protein 3 isoform b OS=Homo sapiens PE=2 SV=1	A6XNC9,A6XND0,A6XND1,B3KRZ1,B3KTQ0,B3KTS0,B3KVF9,B3KVY6,B3KWK7,B4DN53,B4DP07,H0Y485,H0Y5K2,P17936,Q6ZSD0	IGFBP3	31674.1	4	6	9	YGQPLPGYTTK	K	G	0.997	43.2	26.3	15.7	43.2	0	2	0	0	2	1224.63	2814.89	11800000	268	278
Mudpit_Aged_L3_4Left_IAF	Heat shock 70 kDa protein 1B OS=Homo sapiens GN=HSPA1B PE=1 SV=1	A0A0G2JIW1,A0A1U9X7W4_HUMAN,A8K5I0,P0DMV8,P0DMV9,Q59EJ3	HEL-S-103,HSPA1A,HSPA1B	70054	4	4	5	DAGVIAGLNVLR	K	I	0.997	51.8	25	16.2	51.8	0	1	0	0	2	1197.7	7123.9	5987580	160	171
Mudpit_Aged_L3_4Left_IAF	Heat shock 70 kDa protein 1B OS=Homo sapiens GN=HSPA1B PE=1 SV=1	A0A0G2JIW1,A0A1U9X7W4_HUMAN,A8K5I0,P0DMV8,P0DMV9,Q59EJ3	HEL-S-103,HSPA1A,HSPA1B	70054	4	4	5	IINEPTAAAIAYGLDR	R	T	0.997	86.8	26.2	18.4	86.8	0	1	0	0	2	1687.9	6708.43	7978210	172	187
Mudpit_Aged_L3_4Left_IAF	Heat shock 70 kDa protein 1B OS=Homo sapiens GN=HSPA1B PE=1 SV=1	A0A0G2JIW1,A0A1U9X7W4_HUMAN,A8K5I0,P0DMV8,P0DMV9,Q59EJ3	HEL-S-103,HSPA1A,HSPA1B	70054	4	4	5	NQVALNPQNTVFDAK	K	R	0.997	66.8	26.7	17.2	66.8	0	2	0	0	2	1658.85	4961.24	13500000	57	71
Mudpit_Aged_L3_4Left_IAF	Heat shock 70 kDa protein 1B OS=Homo sapiens GN=HSPA1B PE=1 SV=1	A0A0G2JIW1,A0A1U9X7W4_HUMAN,A8K5I0,P0DMV8,P0DMV9,Q59EJ3	HEL-S-103,HSPA1A,HSPA1B	70054	4	4	5	QTQIFTTYSDNQPGVLIQVYEGER	K	A	0.997	68.6	28.4	17.3	3.3	0	0	1	0	2	2786.36	8232.42	4563300	424	447
Mudpit_Aged_L3_4Left_IAF	Protein kinase C substrate 80K-H, isoform CRA_a OS=Homo sapiens GN=PRKCSH PE=4 SV=1	A0A024R7F1,A0A0S2Z4D8,A0A0S2Z4W7,B4DJQ5,K7ELL7,P14314	PRKCSH	59425.8	2	2	2	ETMVTSTTEPSR	K	C	0.964	27.3	25.6	14.7	27.3	0	1	0	0	2	1338.62	1446.88	2493390	488	499
Mudpit_Aged_L3_4Left_IAF	Protein kinase C substrate 80K-H, isoform CRA_a OS=Homo sapiens GN=PRKCSH PE=4 SV=1	A0A024R7F1,A0A0S2Z4D8,A0A0S2Z4W7,B4DJQ5,K7ELL7,P14314	PRKCSH	59425.8	2	2	2	LIELQAGK	K	K	0.99	40.2	27.5	30.8	24.9	0	1	0	0	2	871.525	2282.26	3983770	159	166
Mudpit_Aged_L3_4Left_IAF	Carbonyl reductase [NADPH] 1 OS=Homo sapiens GN=CBR1 PE=1 SV=3	P16152	CBR1	30374.8	2	3	3	FHQLDIDDLQSIR	R	A	0.997	61.2	25	16.8	61.2	0	1	1	0	2	1599.81	5910.55	12800000	59	71
Mudpit_Aged_L3_4Left_IAF	Carbonyl reductase [NADPH] 1 OS=Homo sapiens GN=CBR1 PE=1 SV=3	P16152	CBR1	30374.8	2	3	3	SPEEGAETPVYLALLPPDAEGPHGQFVSEK	K	R	0.997	80.4	25	18	80.4	0	0	1	0	2	3164.54	7823.83	6114160	243	272
Mudpit_Aged_L3_4Left_IAF	Semaphorin-3A OS=Homo sapiens GN=SEMA3A PE=1 SV=1	Q14563	SEMA3A	88890.8	4	6	6	DHIFSFDLVNIK	K	D	0.997	48.6	29.2	16	48.6	0	1	1	0	2	1447.76	8098.84	8793010	75	86
Mudpit_Aged_L3_4Left_IAF	Semaphorin-3A OS=Homo sapiens GN=SEMA3A PE=1 SV=1	Q14563	SEMA3A	88890.8	4	6	6	DLPDDVITFAR	K	S	0.997	51.2	27.9	16.2	51.2	0	1	0	0	2	1261.64	7487.4	20400000	394	404
Mudpit_Aged_L3_4Left_IAF	Semaphorin-3A OS=Homo sapiens GN=SEMA3A PE=1 SV=1	Q14563	SEMA3A	88890.8	4	6	6	EPTAISAMELSTK	R	Q	0.997	68.2	26.7	17.3	68.2	0	2	0	0	2	1377.69	4058.8	15700000	485	497
Mudpit_Aged_L3_4Left_IAF	Semaphorin-3A OS=Homo sapiens GN=SEMA3A PE=1 SV=1	Q14563	SEMA3A	88890.8	4	6	6	TDQGLLLR	R	S	0.99	54.1	29.4	26.4	44.1	0	1	0	0	2	915.526	3105.14	12500000	630	637
Mudpit_Aged_L3_4Left_IAF	Inter-alpha (Globulin) inhibitor H2 OS=Homo sapiens GN=ITIH2 PE=2 SV=1	A2RTY6,D3DRR6,P19823	ITIH2	106466	15	33	114	AEDHFSVIDFNQNIR	R	T	0.997	75.8	26	17.7	75.8	0	2	7	0	2	1804.86	5816.54	124000000	342	356
Mudpit_Aged_L3_4Left_IAF	Inter-alpha (Globulin) inhibitor H2 OS=Homo sapiens GN=ITIH2 PE=2 SV=1	A2RTY6,D3DRR6,P19823	ITIH2	106466	15	33	114	ETAVDGELVVLYDVK	R	R	0.997	86.9	30.9	18.4	86.9	0	12	4	0	2	1649.86	7552.86	164000000	266	280
Mudpit_Aged_L3_4Left_IAF	Inter-alpha (Globulin) inhibitor H2 OS=Homo sapiens GN=ITIH2 PE=2 SV=1	A2RTY6,D3DRR6,P19823	ITIH2	106466	15	33	114	FLHVPDTFEGHFDGVPVISK	R	G	0.997	67.7	26.6	17.2	67.7	0	3	5	2	2	2241.13	6999.58	242000000	223	242
Mudpit_Aged_L3_4Left_IAF	Inter-alpha (Globulin) inhibitor H2 OS=Homo sapiens GN=ITIH2 PE=2 SV=1	A2RTY6,D3DRR6,P19823	ITIH2	106466	15	33	114	FYNQVSTPLLR	K	N	0.997	45.8	25.9	15.9	45.8	0	3	0	0	2	1337.72	5368.92	76400000	489	499
Mudpit_Aged_L3_4Left_IAF	Inter-alpha (Globulin) inhibitor H2 OS=Homo sapiens GN=ITIH2 PE=2 SV=1	A2RTY6,D3DRR6,P19823	ITIH2	106466	15	33	114	IQPSGGTNINEALLR	K	A	0.997	103	26.7	19.5	103	0	6	1	0	2	1582.85	4793.05	72600000	380	394
Mudpit_Aged_L3_4Left_IAF	Inter-alpha (Globulin) inhibitor H2 OS=Homo sapiens GN=ITIH2 PE=2 SV=1	A2RTY6,D3DRR6,P19823	ITIH2	106466	15	33	114	IYGNQDTSSQLK	R	K	0.997	71.8	26.3	17.5	71.8	0	2	0	0	2	1353.66	1574.79	81000000	476	487
Mudpit_Aged_L3_4Left_IAF	Inter-alpha (Globulin) inhibitor H2 OS=Homo sapiens GN=ITIH2 PE=2 SV=1	A2RTY6,D3DRR6,P19823	ITIH2	106466	15	33	114	LSNENHGIAQR	R	I	0.996	53	26.3	16.3	53	0	0	1	0	2	1238.62	1174.19	547766	465	475
Mudpit_Aged_L3_4Left_IAF	Inter-alpha (Globulin) inhibitor H2 OS=Homo sapiens GN=ITIH2 PE=2 SV=1	A2RTY6,D3DRR6,P19823	ITIH2	106466	15	33	114	NVQFNYPHTSVTDVTQNNFHNYFGGSEIVVAGK	R	F	0.988	50.5	25	16.2	50.5	0	0	1	2	2	3683.75	7219.05	47200000	500	532
Mudpit_Aged_L3_4Left_IAF	Inter-alpha (Globulin) inhibitor H2 OS=Homo sapiens GN=ITIH2 PE=2 SV=1	A2RTY6,D3DRR6,P19823	ITIH2	106466	15	33	114	SILQMSLDHHIVTPLTSLVIENEAGDER	R	M	0.997	114	26.5	20.1	114	0	0	3	2	2	3117.59	8401.3	30400000	611	638
Mudpit_Aged_L3_4Left_IAF	Inter-alpha (Globulin) inhibitor H2 OS=Homo sapiens GN=ITIH2 PE=2 SV=1	A2RTY6,D3DRR6,P19823	ITIH2	106466	15	33	114	SLPGESEEMMEEVDQVTLYSYK	R	V	0.997	92.7	25	18.8	15.2	0	12	13	0	2	2564.14	7965.14	139000000	55	76
Mudpit_Aged_L3_4Left_IAF	Inter-alpha (Globulin) inhibitor H2 OS=Homo sapiens GN=ITIH2 PE=2 SV=1	A2RTY6,D3DRR6,P19823	ITIH2	106466	15	33	114	SSALDMENFR	R	T	0.997	67.9	25	17.2	67.9	0	10	0	0	2	1185.52	2394.05	358000000	157	166
Mudpit_Aged_L3_4Left_IAF	Inter-alpha (Globulin) inhibitor H2 OS=Homo sapiens GN=ITIH2 PE=2 SV=1	A2RTY6,D3DRR6,P19823	ITIH2	106466	15	33	114	TEVNVLPGAK	R	V	0.997	37	25	15.3	37	0	4	0	0	2	1027.58	2619.91	481000000	167	176
Mudpit_Aged_L3_4Left_IAF	Inter-alpha (Globulin) inhibitor H2 OS=Homo sapiens GN=ITIH2 PE=2 SV=1	A2RTY6,D3DRR6,P19823	ITIH2	106466	15	33	114	TILDDLRAEDHFSVIDFNQNIR	K	T	0.997	57.1	26.6	16.6	57.1	0	1	3	1	2	2631.32	8554.82	28700000	335	356
Mudpit_Aged_L3_4Left_IAF	Inter-alpha (Globulin) inhibitor H2 OS=Homo sapiens GN=ITIH2 PE=2 SV=1	A2RTY6,D3DRR6,P19823	ITIH2	106466	15	33	114	VQFELHYQEVK	K	W	0.997	61.6	26.2	16.9	61.6	0	4	4	0	2	1419.73	4052.66	254000000	177	187
Mudpit_Aged_L3_4Left_IAF	Inter-alpha (Globulin) inhibitor H2 OS=Homo sapiens GN=ITIH2 PE=2 SV=1	A2RTY6,D3DRR6,P19823	ITIH2	106466	15	33	114	VVNNSPQPQNVVFDVQIPK	K	G	0.997	91.2	26.5	18.7	91.2	0	3	3	0	2	2122.13	6836.75	82600000	94	112
Mudpit_Aged_L3_4Left_IAF	Fructose-bisphosphate aldolase A OS=Homo sapiens GN=ALDOA PE=1 SV=2	P04075,V9HWN7	ALDOA,HEL-S-87p	39420.6	8	13	20	FSHEEIAMATVTALR	K	R	0.987	44.6	26.5	15.8	44.6	0	0	2	0	2	1675.85	5197.09	20100000	244	258
Mudpit_Aged_L3_4Left_IAF	Fructose-bisphosphate aldolase A OS=Homo sapiens GN=ALDOA PE=1 SV=2	P04075,V9HWN7	ALDOA,HEL-S-87p	39420.6	8	13	20	GILAADESTGSIAK	K	R	0.997	77.2	27.9	17.8	77.2	0	3	0	0	2	1332.7	3582.11	22600000	29	42
Mudpit_Aged_L3_4Left_IAF	Fructose-bisphosphate aldolase A OS=Homo sapiens GN=ALDOA PE=1 SV=2	P04075,V9HWN7	ALDOA,HEL-S-87p	39420.6	8	13	20	GVVPLAGTNGETTTQGLDGLSER	K	C	0.997	130	26.2	21.1	130	0	2	1	0	2	2272.14	6146.15	11100000	112	134
Mudpit_Aged_L3_4Left_IAF	Fructose-bisphosphate aldolase A OS=Homo sapiens GN=ALDOA PE=1 SV=2	P04075,V9HWN7	ALDOA,HEL-S-87p	39420.6	8	13	20	IGEHTPSALAIMENANVLAR	K	Y	0.997	76.3	28.6	28.4	65.7	0	0	4	0	2	2107.1	7110.67	19900000	154	173
Mudpit_Aged_L3_4Left_IAF	Fructose-bisphosphate aldolase A OS=Homo sapiens GN=ALDOA PE=1 SV=2	P04075,V9HWN7	ALDOA,HEL-S-87p	39420.6	8	13	20	LQSIGTENTEENR	R	R	0.997	79.1	25.7	17.9	79.1	0	1	0	0	2	1490.71	1475.87	9680520	44	56
Mudpit_Aged_L3_4Left_IAF	Fructose-bisphosphate aldolase A OS=Homo sapiens GN=ALDOA PE=1 SV=2	P04075,V9HWN7	ALDOA,HEL-S-87p	39420.6	8	13	20	YASICQQNGIVPIVEPEILPDGDHDLK	R	R	0.957	38.5	25.5	15.4	38.5	0	0	1	0	2	3021.49	8175.23	2270570	174	200
Mudpit_Aged_L3_4Left_IAF	Fructose-bisphosphate aldolase A OS=Homo sapiens GN=ALDOA PE=1 SV=2	P04075,V9HWN7	ALDOA,HEL-S-87p	39420.6	8	13	20	YASICQQNGIVPIVEPEILPDGDHDLKR	R	C	0.995	48.6	25.6	16	48.6	0	0	2	1	2	3177.59	7308.87	31400000	174	201
Mudpit_Aged_L3_4Left_IAF	Fructose-bisphosphate aldolase A OS=Homo sapiens GN=ALDOA PE=1 SV=2	P04075,V9HWN7	ALDOA,HEL-S-87p	39420.6	8	13	20	YTPSGQAGAAASESLFVSNHAY	K	-	0.997	91.3	26	18.7	91.3	0	1	2	0	2	2228.03	5906.61	46300000	343	364
Mudpit_Aged_L3_4Left_IAF	Epididymis luminal secretory protein 52 OS=Homo sapiens GN=EL52 PE=2 SV=1	K9JA46,P07900	EL52,HSP90AA1	84663.2	5	5	5	APFDLFENR	R	K	0.997	44.1	26.4	15.8	44.1	0	1	0	0	2	1108.54	6430.12	6830850	347	355
Mudpit_Aged_L3_4Left_IAF	Epididymis luminal secretory protein 52 OS=Homo sapiens GN=EL52 PE=2 SV=1	K9JA46,P07900	EL52,HSP90AA1	84663.2	5	5	5	DLVILLYETALLSSGFSLEDPQTHANR	K	I	0.997	59.2	25	16.7	59.2	0	0	1	0	2	3002.55	9350.27	1036960	661	687
Mudpit_Aged_L3_4Left_IAF	Epididymis luminal secretory protein 52 OS=Homo sapiens GN=EL52 PE=2 SV=1	K9JA46,P07900	EL52,HSP90AA1	84663.2	5	5	5	HIYYITGETK	K	D	0.993	31.4	26.3	15	31.4	0	1	0	0	2	1224.63	1764.48	6244530	490	499
Mudpit_Aged_L3_4Left_IAF	Epididymis luminal secretory protein 52 OS=Homo sapiens GN=EL52 PE=2 SV=1	K9JA46,P07900	EL52,HSP90AA1	84663.2	5	5	5	HLEINPDHSIIETLR	K	Q	0.997	71.4	28.1	17.5	71.4	0	0	1	0	2	1786.94	4931	13700000	633	647
Mudpit_Aged_L3_4Left_IAF	Epididymis luminal secretory protein 52 OS=Homo sapiens GN=EL52 PE=2 SV=1	K9JA46,P07900	EL52,HSP90AA1	84663.2	5	5	5	NPDDITNEEYGEFYK	R	S	0.997	82.8	25	18.2	82.8	0	1	0	0	2	1833.78	5606.31	4006310	300	314
Mudpit_Aged_L3_4Left_IAF	Vinculin, isoform CRA_c OS=Homo sapiens GN=VCL PE=4 SV=1	A0A024QZN4,P18206,V9HWK2	HEL114,VCL	123801	6	6	6	AIPDLTAPVAAVQAAVSNLVR	K	V	0.988	39.7	25	15.5	39.7	0	0	1	0	2	2076.18	9246	5299870	36	56
Mudpit_Aged_L3_4Left_IAF	Vinculin, isoform CRA_c OS=Homo sapiens GN=VCL PE=4 SV=1	A0A024QZN4,P18206,V9HWK2	HEL114,VCL	123801	6	6	6	DPSASPGDAGEQAIR	R	Q	0.997	55.6	25	21.1	51	0	1	0	0	2	1470.68	2154.17	3816560	286	300
Mudpit_Aged_L3_4Left_IAF	Vinculin, isoform CRA_c OS=Homo sapiens GN=VCL PE=4 SV=1	A0A024QZN4,P18206,V9HWK2	HEL114,VCL	123801	6	6	6	ELTPQVVSAAR	R	I	0.963	25	25.9	14.6	25	0	1	0	0	2	1170.65	3090.1	4207880	670	680
Mudpit_Aged_L3_4Left_IAF	Vinculin, isoform CRA_c OS=Homo sapiens GN=VCL PE=4 SV=1	A0A024QZN4,P18206,V9HWK2	HEL114,VCL	123801	6	6	6	ETVQTTEDQILK	K	R	0.994	35.2	28.1	15.2	35.2	0	1	0	0	2	1404.72	3620.11	4685800	60	71
Mudpit_Aged_L3_4Left_IAF	Vinculin, isoform CRA_c OS=Homo sapiens GN=VCL PE=4 SV=1	A0A024QZN4,P18206,V9HWK2	HEL114,VCL	123801	6	6	6	SLLDASEEAIK	K	K	0.997	62.1	27.9	16.9	62.1	0	1	0	0	2	1175.62	5138.05	4364040	721	731
Mudpit_Aged_L3_4Left_IAF	Vinculin, isoform CRA_c OS=Homo sapiens GN=VCL PE=4 SV=1	A0A024QZN4,P18206,V9HWK2	HEL114,VCL	123801	6	6	6	VLQLTSWDEDAWASK	R	D	0.997	75.7	29	17.7	75.7	0	1	0	0	2	1748.85	7508.34	1553370	247	261
Mudpit_Aged_L3_4Left_IAF	Triosephosphate isomerase OS=Homo sapiens GN=TPI1 PE=1 SV=3	P60174,Q53HE2,V9HWK1	HEL-S-49,TPI1	30790.8	6	8	14	ELASQPDVDGFLVGGASLKPEFVDIINAK	K	-	0.99	40.6	25.3	15.5	40.6	0	0	1	0	2	3029.58	8977.54	7353280	257	285
Mudpit_Aged_L3_4Left_IAF	Triosephosphate isomerase OS=Homo sapiens GN=TPI1 PE=1 SV=3	P60174,Q53HE2,V9HWK1	HEL-S-49,TPI1	30790.8	6	8	14	HVFGESDELIGQK	R	V	0.997	46.6	26	15.9	46.6	0	2	2	0	2	1458.72	3460.76	25200000	138	150
Mudpit_Aged_L3_4Left_IAF	Triosephosphate isomerase OS=Homo sapiens GN=TPI1 PE=1 SV=3	P60174,Q53HE2,V9HWK1	HEL-S-49,TPI1	30790.8	6	8	14	IAVAAQNCYK	K	V	0.983	28.8	26.2	14.8	28.8	0	1	0	0	2	1138.56	1714.76	8228860	97	106
Mudpit_Aged_L3_4Left_IAF	Triosephosphate isomerase OS=Homo sapiens GN=TPI1 PE=1 SV=3	P60174,Q53HE2,V9HWK1	HEL-S-49,TPI1	30790.8	6	8	14	QSLGELIGTLNAAK	K	V	0.997	81.1	26.5	18.7	80.5	0	2	0	0	2	1414.79	7145.47	11500000	57	70
Mudpit_Aged_L3_4Left_IAF	Triosephosphate isomerase OS=Homo sapiens GN=TPI1 PE=1 SV=3	P60174,Q53HE2,V9HWK1	HEL-S-49,TPI1	30790.8	6	8	14	VTNGAFTGEISPGMIK	K	D	0.997	72.1	26.7	17.5	72.1	0	1	0	0	2	1621.83	5613.02	2402980	107	122
Mudpit_Aged_L3_4Left_IAF	Triosephosphate isomerase OS=Homo sapiens GN=TPI1 PE=1 SV=3	P60174,Q53HE2,V9HWK1	HEL-S-49,TPI1	30790.8	6	8	14	VVLAYEPVWAIGTGK	K	T	0.997	70.2	25.6	17.4	70.2	0	3	2	0	2	1602.89	7825.5	39300000	198	212
Mudpit_Aged_L3_4Left_IAF	Hyaluronan-binding protein 2 OS=Homo sapiens GN=HABP2 PE=1 SV=1	Q14520	HABP2	62671.4	2	2	3	DEIPHNDIALLK	R	L	0.985	40.3	27.4	15.5	40.3	0	0	1	0	2	1377.74	4897.91	12700000	405	416
Mudpit_Aged_L3_4Left_IAF	Hyaluronan-binding protein 2 OS=Homo sapiens GN=HABP2 PE=1 SV=1	Q14520	HABP2	62671.4	2	2	3	VVLGDQDLK	K	K	0.997	54.1	27.9	21.5	49	0	2	0	0	2	986.552	2640.66	23100000	373	381
Mudpit_Aged_L3_4Left_IAF	Sulfhydryl oxidase 1 OS=Homo sapiens GN=QSOX1 PE=1 SV=3	O00391	QSOX1	82578.7	13	19	40	AHFSPSNIILDFPAAGSAAR	K	R	0.997	108	27.5	24.6	103	0	1	2	0	2	2042.05	6955.91	51700000	533	552
Mudpit_Aged_L3_4Left_IAF	Sulfhydryl oxidase 1 OS=Homo sapiens GN=QSOX1 PE=1 SV=3	O00391	QSOX1	82578.7	13	19	40	DFNIPGFPTVR	R	F	0.995	34.1	27.2	15.1	34.1	0	3	0	0	2	1262.65	8181.74	27800000	112	122
Mudpit_Aged_L3_4Left_IAF	Sulfhydryl oxidase 1 OS=Homo sapiens GN=QSOX1 PE=1 SV=3	O00391	QSOX1	82578.7	13	19	40	DVQNVAAAPELAMGALELESR	R	N	0.997	99.1	26.6	19.2	99.1	0	2	1	0	2	2184.1	8997.27	12900000	554	574
Mudpit_Aged_L3_4Left_IAF	Sulfhydryl oxidase 1 OS=Homo sapiens GN=QSOX1 PE=1 SV=3	O00391	QSOX1	82578.7	13	19	40	EVALDLSQHK	R	G	0.997	49.7	25.5	16.1	49.7	0	2	5	0	2	1139.61	1889.59	108000000	202	211
Mudpit_Aged_L3_4Left_IAF	Sulfhydryl oxidase 1 OS=Homo sapiens GN=QSOX1 PE=1 SV=3	O00391	QSOX1	82578.7	13	19	40	IYMADLESALHYILR	K	I	0.997	93	27.4	18.8	93	0	1	4	0	2	1823.94	8737.19	35400000	299	313
Mudpit_Aged_L3_4Left_IAF	Sulfhydryl oxidase 1 OS=Homo sapiens GN=QSOX1 PE=1 SV=3	O00391	QSOX1	82578.7	13	19	40	LAGAPSEDPQFPK	R	V	0.997	66.3	26.2	17.1	66.3	0	3	0	0	2	1356.68	3774.12	29700000	488	500
Mudpit_Aged_L3_4Left_IAF	Sulfhydryl oxidase 1 OS=Homo sapiens GN=QSOX1 PE=1 SV=3	O00391	QSOX1	82578.7	13	19	40	LEEIDGFFAR	K	N	0.997	45.6	25.4	15.9	45.6	0	4	0	0	2	1196.59	6558.82	34700000	173	182
Mudpit_Aged_L3_4Left_IAF	Sulfhydryl oxidase 1 OS=Homo sapiens GN=QSOX1 PE=1 SV=3	O00391	QSOX1	82578.7	13	19	40	NNEEYLALIFEK	R	G	0.997	51.2	26.2	16.2	51.2	0	1	0	0	2	1482.75	8059.21	7718070	183	194
Mudpit_Aged_L3_4Left_IAF	Sulfhydryl oxidase 1 OS=Homo sapiens GN=QSOX1 PE=1 SV=3	O00391	QSOX1	82578.7	13	19	40	RDVQNVAAAPELAMGALELESR	R	N	0.996	56.5	26.8	16.5	56.5	0	0	1	0	2	2340.2	7416.23	3900320	553	574
Mudpit_Aged_L3_4Left_IAF	Sulfhydryl oxidase 1 OS=Homo sapiens GN=QSOX1 PE=1 SV=3	O00391	QSOX1	82578.7	13	19	40	SALYSPSDPLTLLQADTVR	R	G	0.997	145	26.3	22	145	0	2	2	0	2	2047.07	8623.79	43000000	33	51
Mudpit_Aged_L3_4Left_IAF	Sulfhydryl oxidase 1 OS=Homo sapiens GN=QSOX1 PE=1 SV=3	O00391	QSOX1	82578.7	13	19	40	SFYTAYLQR	R	L	0.997	39.5	27.1	15.5	39.5	0	1	0	0	2	1148.57	5261.98	17300000	257	265
Mudpit_Aged_L3_4Left_IAF	Sulfhydryl oxidase 1 OS=Homo sapiens GN=QSOX1 PE=1 SV=3	O00391	QSOX1	82578.7	13	19	40	VLNTEANVVR	R	K	0.997	54.7	27.9	23.6	47.5	0	2	0	0	2	1114.62	1836.54	12300000	218	227
Mudpit_Aged_L3_4Left_IAF	Sulfhydryl oxidase 1 OS=Homo sapiens GN=QSOX1 PE=1 SV=3	O00391	QSOX1	82578.7	13	19	40	VPVLMESR	R	S	0.99	42.7	26.8	15.7	42.7	0	3	0	0	2	930.508	1799.52	18700000	249	256
Mudpit_Aged_L3_4Left_IAF	cDNA FLJ61290, highly similar to Neutral alpha-glucosidase AB OS=Homo sapiens PE=2 SV=1	B4DJ30,Q14697,V9HWJ0	GANAB,HEL-S-164nA	106876	8	9	10	DENSVELTMAEGPYK	R	I	0.997	109	25	19.8	109	0	1	0	0	2	1682.76	5795.94	5552180	134	148
Mudpit_Aged_L3_4Left_IAF	cDNA FLJ61290, highly similar to Neutral alpha-glucosidase AB OS=Homo sapiens PE=2 SV=1	B4DJ30,Q14697,V9HWJ0	GANAB,HEL-S-164nA	106876	8	9	10	FGAVWTGDNTAEWDHLK	R	I	0.993	62.5	35.8	16.9	62.5	0	0	1	0	2	1946.9	6332.29	4507790	611	627
Mudpit_Aged_L3_4Left_IAF	cDNA FLJ61290, highly similar to Neutral alpha-glucosidase AB OS=Homo sapiens PE=2 SV=1	B4DJ30,Q14697,V9HWJ0	GANAB,HEL-S-164nA	106876	8	9	10	FSFSGNTLVSSSADPEGHFETPIWIER	R	V	0.997	70.4	25	17.4	70.4	0	0	2	0	2	3010.42	8525.7	9117120	865	891
Mudpit_Aged_L3_4Left_IAF	cDNA FLJ61290, highly similar to Neutral alpha-glucosidase AB OS=Homo sapiens PE=2 SV=1	B4DJ30,Q14697,V9HWJ0	GANAB,HEL-S-164nA	106876	8	9	10	GLLEFEHQR	R	A	0.997	37	26.4	15.3	37	0	1	1	0	2	1128.58	2837.74	18300000	174	182
Mudpit_Aged_L3_4Left_IAF	cDNA FLJ61290, highly similar to Neutral alpha-glucosidase AB OS=Homo sapiens PE=2 SV=1	B4DJ30,Q14697,V9HWJ0	GANAB,HEL-S-164nA	106876	8	9	10	HHGPQTLYLPVTLSSIPVFQR	K	G	0.949	32.5	25	15	32.5	0	0	0	1	2	2390.3	7730.93	4447850	785	805
Mudpit_Aged_L3_4Left_IAF	cDNA FLJ61290, highly similar to Neutral alpha-glucosidase AB OS=Homo sapiens PE=2 SV=1	B4DJ30,Q14697,V9HWJ0	GANAB,HEL-S-164nA	106876	8	9	10	NPEPELLVR	K	W	0.997	47.9	25.9	16	47.9	0	1	0	0	2	1066.59	3933.64	18100000	654	662
Mudpit_Aged_L3_4Left_IAF	cDNA FLJ61290, highly similar to Neutral alpha-glucosidase AB OS=Homo sapiens PE=2 SV=1	B4DJ30,Q14697,V9HWJ0	GANAB,HEL-S-164nA	106876	8	9	10	VPDVLVADPPIAR	R	L	0.997	69.8	25	21.4	65.8	0	1	0	0	2	1361.78	5963.07	6847170	115	127
Mudpit_Aged_L3_4Left_IAF	cDNA FLJ61290, highly similar to Neutral alpha-glucosidase AB OS=Homo sapiens PE=2 SV=1	B4DJ30,Q14697,V9HWJ0	GANAB,HEL-S-164nA	106876	8	9	10	YFTWDPSR	R	F	0.99	32.4	25	15	32.4	0	1	0	0	2	1071.49	5115.42	6248680	438	445
Mudpit_Aged_L3_4Left_IAF	Chondroadherin OS=Homo sapiens GN=CHAD PE=2 SV=2	O15335	CHAD	40477.7	11	20	108	AGAFDDLTELTYLYLDHNK	R	V	0.997	142	25.3	21.9	142	0	4	5	0	2	2199.06	9022.33	1790000000	116	134
Mudpit_Aged_L3_4Left_IAF	Chondroadherin OS=Homo sapiens GN=CHAD PE=2 SV=2	O15335	CHAD	40477.7	11	20	108	AGAFQGAK	R	D	0.99	50.5	25	16.2	50.5	0	3	0	0	2	749.394	1178.87	963515	164	171
Mudpit_Aged_L3_4Left_IAF	Chondroadherin OS=Homo sapiens GN=CHAD PE=2 SV=2	O15335	CHAD	40477.7	11	20	108	AMPNLVSLHLQHCQIR	R	E	0.96	35.6	27	15.2	35.6	0	0	0	2	2	1917.98	4424.04	12300000	73	88
Mudpit_Aged_L3_4Left_IAF	Chondroadherin OS=Homo sapiens GN=CHAD PE=2 SV=2	O15335	CHAD	40477.7	11	20	108	FSDGAFLGVTTLK	K	H	0.997	83.1	26	18.2	83.1	0	15	5	0	2	1355.72	6817.03	241000000	259	271
Mudpit_Aged_L3_4Left_IAF	Chondroadherin OS=Homo sapiens GN=CHAD PE=2 SV=2	O15335	CHAD	40477.7	11	20	108	LNQLPSNFPFDSLETLALTNNPWK	R	C	0.997	139	26	21.7	139	0	2	4	0	2	2759.4	9183.97	188000000	280	303
Mudpit_Aged_L3_4Left_IAF	Chondroadherin OS=Homo sapiens GN=CHAD PE=2 SV=2	O15335	CHAD	40477.7	11	20	108	NNFPVLAANSFR	R	A	0.997	65.2	28	17.1	65.2	0	6	2	0	2	1349.7	5906.03	586000000	61	72
Mudpit_Aged_L3_4Left_IAF	Chondroadherin OS=Homo sapiens GN=CHAD PE=2 SV=2	O15335	CHAD	40477.7	11	20	108	NQLSSYPSAALSK	R	L	0.997	67.6	27.2	17.2	67.6	0	11	3	0	2	1365.7	3445.13	230000000	205	217
Mudpit_Aged_L3_4Left_IAF	Chondroadherin OS=Homo sapiens GN=CHAD PE=2 SV=2	O15335	CHAD	40477.7	11	20	108	QLIYLYLSHNDIR	K	V	0.997	89.3	26.3	29.1	78.8	0	3	3	0	2	1647.89	5974.13	71400000	100	112
Mudpit_Aged_L3_4Left_IAF	Chondroadherin OS=Homo sapiens GN=CHAD PE=2 SV=2	O15335	CHAD	40477.7	11	20	108	SIPDNAFQSFGR	K	Y	0.997	53.2	30.6	16.3	53.2	0	11	0	0	2	1338.64	5492.99	285000000	233	244
Mudpit_Aged_L3_4Left_IAF	Chondroadherin OS=Homo sapiens GN=CHAD PE=2 SV=2	O15335	CHAD	40477.7	11	20	108	WLYLSENALSSLQPGALDDVENLAK	R	F	0.997	106	27	19.6	106	0	4	3	0	2	2746.39	9082.69	254000000	175	199
Mudpit_Aged_L3_4Left_IAF	Chondroadherin OS=Homo sapiens GN=CHAD PE=2 SV=2	O15335	CHAD	40477.7	11	20	108	YLETLWLDNTNLEK	R	F	0.997	75.4	27.3	17.7	75.4	0	19	3	0	2	1751.89	7858.88	163000000	245	258
Mudpit_Aged_L3_4Left_IAF	Myosin, light polypeptide 3, alkali ventricular, skeletal, slow, isoform CRA_a OS=Homo sapiens GN=MYL3 PE=4 SV=1	A0A024R2Q5,P08590	MYL3	21932.5	2	2	2	ALGQNPTQAEVLR	R	V	0.994	34.8	26.7	15.2	34.8	0	1	0	0	2	1396.75	3171.12	6513910	82	94
Mudpit_Aged_L3_4Left_IAF	Myosin, light polypeptide 3, alkali ventricular, skeletal, slow, isoform CRA_a OS=Homo sapiens GN=MYL3 PE=4 SV=1	A0A024R2Q5,P08590	MYL3	21932.5	2	2	2	MMDFETFLPMLQHISK	K	N	0.951	29.6	25.2	14.8	29.6	0	0	1	0	2	1999.93	8202.94	2714120	108	123
Mudpit_Aged_L3_4Left_IAF	cDNA FLJ54049, highly similar to Multimerin-2 OS=Homo sapiens PE=2 SV=1	B4DEW5,B4E3H8,Q9H8L6	MMRN2	104408	2	2	2	EAEPLVDIR	K	V	0.997	53.1	25	16.3	53.1	0	1	0	0	2	1041.56	4055.71	6021690	798	806
Mudpit_Aged_L3_4Left_IAF	cDNA FLJ54049, highly similar to Multimerin-2 OS=Homo sapiens PE=2 SV=1	B4DEW5,B4E3H8,Q9H8L6	MMRN2	104408	2	2	2	VWFELTQGSITK	R	R	0.997	53.5	27	16.3	53.5	0	1	0	0	2	1408.75	6827.83	6963010	922	933
Mudpit_Aged_L3_4Left_IAF	GNPTG protein (Fragment) OS=Homo sapiens GN=GNPTG PE=2 SV=1	A2VDJ4,Q9UJJ9	GNPTG	33974	2	2	2	DPSPVSGPVHLFR	R	L	0.997	54.6	26.4	16.4	54.6	0	0	1	0	2	1407.74	5126.72	5268700	54	66
Mudpit_Aged_L3_4Left_IAF	GNPTG protein (Fragment) OS=Homo sapiens GN=GNPTG PE=2 SV=1	A2VDJ4,Q9UJJ9	GNPTG	33974	2	2	2	TLFEDAGYLK	R	T	0.996	34.9	25	15.2	34.9	0	1	0	0	2	1156.59	5763.05	6213740	211	220
Mudpit_Aged_L3_4Left_IAF	Cathepsin D OS=Homo sapiens GN=CTSD PE=1 SV=1	A0A1B0GV23_HUMAN,A0A1B0GVD5_HUMAN,A0A1B0GW44_HUMAN,A0A1B0GWE8_HUMAN,P07339,V9HWI3	CTSD,HEL-S-130P	44553	5	7	7	DPDAQPGGELMLGGTDSK	R	Y	0.997	43.3	25	15.7	43.3	0	2	0	0	2	1787.81	4808.99	11500000	236	253
Mudpit_Aged_L3_4Left_IAF	Cathepsin D OS=Homo sapiens GN=CTSD PE=1 SV=1	A0A1B0GV23_HUMAN,A0A1B0GVD5_HUMAN,A0A1B0GW44_HUMAN,A0A1B0GWE8_HUMAN,P07339,V9HWI3	CTSD,HEL-S-130P	44553	5	7	7	FDGILGMAYPR	K	I	0.997	42.3	25.7	17	40.9	0	2	0	0	2	1239.62	6415.35	12300000	195	205
Mudpit_Aged_L3_4Left_IAF	Cathepsin D OS=Homo sapiens GN=CTSD PE=1 SV=1	A0A1B0GV23_HUMAN,A0A1B0GVD5_HUMAN,A0A1B0GW44_HUMAN,A0A1B0GWE8_HUMAN,P07339,V9HWI3	CTSD,HEL-S-130P	44553	5	7	7	LSPEDYTLK	K	V	0.997	34.8	26.1	26.3	23.6	0	1	0	0	2	1065.55	4105.21	10600000	349	357
Mudpit_Aged_L3_4Left_IAF	Cathepsin D OS=Homo sapiens GN=CTSD PE=1 SV=1	A0A1B0GV23_HUMAN,A0A1B0GVD5_HUMAN,A0A1B0GW44_HUMAN,A0A1B0GWE8_HUMAN,P07339,V9HWI3	CTSD,HEL-S-130P	44553	5	7	7	QPGITFIAAK	K	F	0.97	27.5	26.3	14.7	27.5	0	1	0	0	2	1045.6	4383.95	6183890	185	194
Mudpit_Aged_L3_4Left_IAF	Cathepsin D OS=Homo sapiens GN=CTSD PE=1 SV=1	A0A1B0GV23_HUMAN,A0A1B0GVD5_HUMAN,A0A1B0GW44_HUMAN,A0A1B0GWE8_HUMAN,P07339,V9HWI3	CTSD,HEL-S-130P	44553	5	7	7	VSTLPAITLK	K	L	0.985	29.1	25	14.8	29.1	0	1	0	0	2	1042.65	5139.38	4328510	332	341
Mudpit_Aged_L3_4Left_IAF	Flavin reductase (NADPH) OS=Homo sapiens GN=BLVRB PE=1 SV=3	P30043,V9HWI1	BLVRB,HEL-S-10	22118.7	2	2	2	TVAGQDAVIVLLGTR	K	N	0.995	53.7	25	16.4	53.7	0	0	1	0	2	1512.87	7488.01	3816510	64	78
Mudpit_Aged_L3_4Left_IAF	Flavin reductase (NADPH) OS=Homo sapiens GN=BLVRB PE=1 SV=3	P30043,V9HWI1	BLVRB,HEL-S-10	22118.7	2	2	2	YVAVMPPHIGDQPLTGAYTVTLDGR	K	G	0.99	41.4	25.2	15.6	41.4	0	0	1	0	2	2671.36	7519.36	1185360	146	170
Mudpit_Aged_L3_4Left_IAF	Alcohol dehydrogenase [NADP(+)] OS=Homo sapiens GN=AKR1A1 PE=1 SV=3	P14550,V9HWI0	AKR1A1,HEL-S-165mP	36573.6	2	2	2	GLEVTAYSPLGSSDR	R	A	0.997	68.3	27	17.3	68.3	0	1	0	0	2	1551.77	5624.56	5191810	204	218
Mudpit_Aged_L3_4Left_IAF	Alcohol dehydrogenase [NADP(+)] OS=Homo sapiens GN=AKR1A1 PE=1 SV=3	P14550,V9HWI0	AKR1A1,HEL-S-165mP	36573.6	2	2	2	MPLIGLGTWK	K	S	0.997	35.5	27.4	15.2	0	0	1	0	0	2	1115.63	7184.13	2816420	14	23
Mudpit_Aged_L3_4Left_IAF	Putative uncharacterized protein OS=Homo sapiens PE=2 SV=1	Q9HBP0		47454.7	5	5	11	AALLNAIR	K	K	0.99	39.1	25	41.6	12.9	0	1	0	0	2	841.525	3544.2	4858540	81	88
Mudpit_Aged_L3_4Left_IAF	Putative uncharacterized protein OS=Homo sapiens PE=2 SV=1	Q9HBP0		47454.7	5	5	11	AEVWLFLK	R	V	0.99	36.9	25.4	15.3	36.9	0	2	0	0	2	1005.58	7491.17	8026260	153	160
Mudpit_Aged_L3_4Left_IAF	Putative uncharacterized protein OS=Homo sapiens PE=2 SV=1	Q9HBP0		47454.7	5	5	11	EGSDLSVVER	K	A	0.997	80.1	27.3	31.8	66.4	0	6	0	0	2	1090.54	3266.7	155000000	143	152
Mudpit_Aged_L3_4Left_IAF	Putative uncharacterized protein OS=Homo sapiens PE=2 SV=1	Q9HBP0		47454.7	5	5	11	HPQGSLDTGEEAEEVGLK	K	G	0.997	80.1	25	18	80.1	0	0	1	0	2	1895.9	3285.02	6076680	181	198
Mudpit_Aged_L3_4Left_IAF	Putative uncharacterized protein OS=Homo sapiens PE=2 SV=1	Q9HBP0		47454.7	5	5	11	SELLLSEK	R	V	0.99	45.4	25.9	20.1	41.2	0	1	0	0	2	918.514	2721.68	8128010	202	209
Mudpit_Aged_L3_4Left_IAF	Creatine kinase B-type OS=Homo sapiens GN=CKB PE=1 SV=1	P12277,V9HW77,V9HWH2	CKB,HEL-211,HEL-S-29	42645.1	4	4	7	DLFDPIIEDR	K	H	0.993	31.2	26.5	15	31.2	0	1	0	0	2	1232.62	7775.42	2198760	87	96
Mudpit_Aged_L3_4Left_IAF	Creatine kinase B-type OS=Homo sapiens GN=CKB PE=1 SV=1	P12277,V9HW77,V9HWH2	CKB,HEL-211,HEL-S-29	42645.1	4	4	7	LAVEALSSLDGDLAGR	K	Y	0.997	97.3	26.5	19.1	97.3	0	4	0	0	2	1586.84	6997.05	29800000	157	172
Mudpit_Aged_L3_4Left_IAF	Creatine kinase B-type OS=Homo sapiens GN=CKB PE=1 SV=1	P12277,V9HW77,V9HWH2	CKB,HEL-211,HEL-S-29	42645.1	4	4	7	LLIEMEQR	K	L	0.976	30.4	28.6	14.9	30.4	0	1	0	0	2	1031.56	4237.64	6214230	359	366
Mudpit_Aged_L3_4Left_IAF	Creatine kinase B-type OS=Homo sapiens GN=CKB PE=1 SV=1	P12277,V9HW77,V9HWH2	CKB,HEL-211,HEL-S-29	42645.1	4	4	7	VLTPELYAELR	K	A	0.997	60.6	25.1	16.8	60.6	0	1	0	0	2	1303.73	6242.16	13500000	33	43
Mudpit_Aged_L3_4Left_IAF	Proteoglycan 4 OS=Homo sapiens GN=PRG4 PE=1 SV=1	A0A0U1RR20	PRG4	146455	11	19	70	DAGYPKPIFK	K	G	0.995	45.6	26.9	15.8	45.6	0	2	2	0	2	1135.61	3067.28	38000000	1182	1191
Mudpit_Aged_L3_4Left_IAF	Proteoglycan 4 OS=Homo sapiens GN=PRG4 PE=1 SV=1	A0A0U1RR20	PRG4	146455	11	19	70	DQYYNIDVPSR	K	T	0.997	62.9	25	16.9	62.9	0	9	1	0	2	1369.64	5344.45	242000000	1330	1340
Mudpit_Aged_L3_4Left_IAF	Proteoglycan 4 OS=Homo sapiens GN=PRG4 PE=1 SV=1	A0A0U1RR20	PRG4	146455	11	19	70	GFGGLTGQIVAALSTAK	K	Y	0.997	68.6	25	17.3	68.6	0	1	1	0	2	1590.89	8761.4	9959590	1192	1208
Mudpit_Aged_L3_4Left_IAF	Proteoglycan 4 OS=Homo sapiens GN=PRG4 PE=1 SV=1	A0A0U1RR20	PRG4	146455	11	19	70	GGSIQQYIYK	R	Q	0.997	45	26	22.5	38.3	0	3	0	0	2	1156.6	3831.83	42800000	1222	1231
Mudpit_Aged_L3_4Left_IAF	Proteoglycan 4 OS=Homo sapiens GN=PRG4 PE=1 SV=1	A0A0U1RR20	PRG4	146455	11	19	70	GHYFWMLSPFSPPSPAR	R	R	0.973	33.8	25.7	15.1	33.8	0	0	1	0	2	1976.95	8089.04	3419310	1124	1140
Mudpit_Aged_L3_4Left_IAF	Proteoglycan 4 OS=Homo sapiens GN=PRG4 PE=1 SV=1	A0A0U1RR20	PRG4	146455	11	19	70	GLPNVVTSAISLPNIR	R	K	0.997	97.2	25	19.1	97.2	0	2	2	0	2	1650.95	8093.22	23800000	1302	1317
Mudpit_Aged_L3_4Left_IAF	Proteoglycan 4 OS=Homo sapiens GN=PRG4 PE=1 SV=1	A0A0U1RR20	PRG4	146455	11	19	70	ITEVWGIPSPIDTVFTR	R	C	0.997	88.8	26.1	21.8	85.6	0	3	3	0	2	1931.03	9064.15	357000000	1142	1158
Mudpit_Aged_L3_4Left_IAF	Proteoglycan 4 OS=Homo sapiens GN=PRG4 PE=1 SV=1	A0A0U1RR20	PRG4	146455	11	19	70	KPDGYDYYAFSK	R	D	0.997	77.2	25	17.8	77.2	0	15	13	0	2	1453.66	3591.56	167000000	1318	1329
Mudpit_Aged_L3_4Left_IAF	Proteoglycan 4 OS=Homo sapiens GN=PRG4 PE=1 SV=1	A0A0U1RR20	PRG4	146455	11	19	70	RPALNYPVYGETTQVR	R	R	0.981	38.5	27.1	15.4	38.5	0	0	1	0	2	1863.97	3915.41	6971940	1242	1257
Mudpit_Aged_L3_4Left_IAF	Proteoglycan 4 OS=Homo sapiens GN=PRG4 PE=1 SV=1	A0A0U1RR20	PRG4	146455	11	19	70	VIESEEITEVK	K	D	0.997	73.9	28	25.3	66.2	0	1	0	0	2	1275.67	3114.25	3735650	148	158
Mudpit_Aged_L3_4Left_IAF	Proteoglycan 4 OS=Homo sapiens GN=PRG4 PE=1 SV=1	A0A0U1RR20	PRG4	146455	11	19	70	VPNQGIIINPMLSDETNICNGKPVDGLTTLR	R	N	0.997	71	25.6	17.4	71	0	0	9	1	2	3380.72	8200.24	45200000	1085	1115
Mudpit_Aged_L3_4Left_IAF	Heterogeneous nuclear ribonucleoproteins A2/B1 OS=Homo sapiens GN=HNRNPA2B1 PE=1 SV=2	P22626	HNRNPA2B1	37430.3	3	4	4	GFGFVTFDDHDPVDK	R	I	0.997	42.4	25	15.7	42.4	0	1	1	0	2	1695.77	6295.07	23700000	154	168
Mudpit_Aged_L3_4Left_IAF	Heterogeneous nuclear ribonucleoproteins A2/B1 OS=Homo sapiens GN=HNRNPA2B1 PE=1 SV=2	P22626	HNRNPA2B1	37430.3	3	4	4	IDTIEIITDR	K	Q	0.997	48.6	27.8	18.9	45.8	0	1	0	0	2	1188.65	5874.07	6144640	138	147
Mudpit_Aged_L3_4Left_IAF	Heterogeneous nuclear ribonucleoproteins A2/B1 OS=Homo sapiens GN=HNRNPA2B1 PE=1 SV=2	P22626	HNRNPA2B1	37430.3	3	4	4	NMGGPYGGGNYGPGGSGGSGGYGGR	R	S	0.997	147	25	22.2	147	0	1	0	0	2	2205.9	2517.55	1132480	326	350
Mudpit_Aged_L3_4Left_IAF	cDNA, FLJ94267, highly similar to Homo sapiens glutathione S-transferase omega 1 (GSTO1), mRNA OS=Homo sapiens PE=2 SV=1	B2R983,P78417,Q5TA02,V9HWG9	GSTO1,HEL-S-21	27567.2	3	3	3	EDPTVSALLTSEK	K	D	0.997	49	28.3	16.1	49	0	1	0	0	2	1389.71	5599.89	11700000	208	220
Mudpit_Aged_L3_4Left_IAF	cDNA, FLJ94267, highly similar to Homo sapiens glutathione S-transferase omega 1 (GSTO1), mRNA OS=Homo sapiens PE=2 SV=1	B2R983,P78417,Q5TA02,V9HWG9	GSTO1,HEL-S-21	27567.2	3	3	3	HEVININLK	R	N	0.997	57.6	25	16.6	57.6	0	1	0	0	2	1079.62	2663.03	3865080	49	57
Mudpit_Aged_L3_4Left_IAF	cDNA, FLJ94267, highly similar to Homo sapiens glutathione S-transferase omega 1 (GSTO1), mRNA OS=Homo sapiens PE=2 SV=1	B2R983,P78417,Q5TA02,V9HWG9	GSTO1,HEL-S-21	27567.2	3	3	3	LLPDDPYEK	K	A	0.991	30.2	26.4	21	24.1	0	1	0	0	2	1089.55	3620.47	5445610	102	110
Mudpit_Aged_L3_4Left_IAF	WD repeat-containing protein 1 OS=Homo sapiens GN=WDR1 PE=1 SV=4	O75083,Q53GN4,Q53H17,Q59ER5,V9HWG7	HEL-S-52,WDR1	66193.2	2	2	2	CFSIDNPGYEPEVVAVHPGGDTVAIGGVDGNVR	K	L	0.961	31	25	14.9	31	0	0	1	0	2	3398.6	7375.37	3103000	438	470
Mudpit_Aged_L3_4Left_IAF	WD repeat-containing protein 1 OS=Homo sapiens GN=WDR1 PE=1 SV=4	O75083,Q53GN4,Q53H17,Q59ER5,V9HWG7	HEL-S-52,WDR1	66193.2	2	2	2	YAPSGFYIASGDVSGK	K	L	0.997	51	25	16.2	51	0	1	0	0	2	1618.77	5397.62	3697380	66	81
Mudpit_Aged_L3_4Left_IAF	Protein-glutamine gamma-glutamyltransferase 2 OS=Homo sapiens GN=TGM2 PE=1 SV=2	P21980,V9HWG3	HEL-S-45,TGM2	77329.1	6	6	7	ALLVEPVINSYLLAER	R	D	0.997	35.9	25.4	15.2	35.9	0	1	0	0	2	1800.03	8926.59	6856730	565	580
Mudpit_Aged_L3_4Left_IAF	Protein-glutamine gamma-glutamyltransferase 2 OS=Homo sapiens GN=TGM2 PE=1 SV=2	P21980,V9HWG3	HEL-S-45,TGM2	77329.1	6	6	7	LAEKEETGMAMR	K	I	0.997	57.2	25.6	16.6	57.2	0	0	1	0	2	1365.65	1276.7	2778310	465	476
Mudpit_Aged_L3_4Left_IAF	Protein-glutamine gamma-glutamyltransferase 2 OS=Homo sapiens GN=TGM2 PE=1 SV=2	P21980,V9HWG3	HEL-S-45,TGM2	77329.1	6	6	7	NEFGEIQGDK	R	S	0.997	46.6	25.8	15.9	46.6	0	1	0	0	2	1136.52	2185.96	5087570	318	327
Mudpit_Aged_L3_4Left_IAF	Protein-glutamine gamma-glutamyltransferase 2 OS=Homo sapiens GN=TGM2 PE=1 SV=2	P21980,V9HWG3	HEL-S-45,TGM2	77329.1	6	6	7	NYEASVDSLTFSVVTGPAPSQEAGTK	R	A	0.991	42.6	26.2	15.7	42.6	0	0	1	0	2	2655.28	7491.86	2477400	49	74
Mudpit_Aged_L3_4Left_IAF	Protein-glutamine gamma-glutamyltransferase 2 OS=Homo sapiens GN=TGM2 PE=1 SV=2	P21980,V9HWG3	HEL-S-45,TGM2	77329.1	6	6	7	TVEIPDPVEAGEEVK	K	V	0.997	35.9	26.9	15.2	35.9	0	2	0	0	2	1611.81	5772.97	6518350	635	649
Mudpit_Aged_L3_4Left_IAF	Protein-glutamine gamma-glutamyltransferase 2 OS=Homo sapiens GN=TGM2 PE=1 SV=2	P21980,V9HWG3	HEL-S-45,TGM2	77329.1	6	6	7	VVTNYNSAHDQNSNLLIEYFR	R	N	0.997	62.8	26	16.9	62.8	0	0	1	0	2	2497.21	6671.85	3343630	297	317
Mudpit_Aged_L3_4Left_IAF	Cadherin-5 OS=Homo sapiens GN=CDH5 PE=1 SV=1	I3L1J2,P33151,Q4VAI4,Q59EA3	CDH5	87529.5	2	2	2	YEIVVEAR	R	D	0.986	30.4	28.1	26.8	18.4	0	1	0	0	2	978.525	3212.56	3940520	223	230
Mudpit_Aged_L3_4Left_IAF	Cadherin-5 OS=Homo sapiens GN=CDH5 PE=1 SV=1	I3L1J2,P33151,Q4VAI4,Q59EA3	CDH5	87529.5	2	2	2	YTFVVPEDTR	K	V	0.997	50.6	25.9	16.2	50.6	0	1	0	0	2	1226.61	4843.85	11400000	263	272
Mudpit_Aged_L3_4Left_IAF	Alpha-1-acid glycoprotein 1 OS=Homo sapiens GN=ORM1 PE=1 SV=1	P02763,V9HWF6	HEL-S-153w,ORM1	23512.1	7	11	34	EQLGEFYEALDCLR	K	I	0.997	66.9	25	17.2	66.9	0	2	0	0	2	1743.79	8770.47	12200000	154	167
Mudpit_Aged_L3_4Left_IAF	Alpha-1-acid glycoprotein 1 OS=Homo sapiens GN=ORM1 PE=1 SV=1	P02763,V9HWF6	HEL-S-153w,ORM1	23512.1	7	11	34	NWGLSVYADKPETTK	K	E	0.997	61.2	31.8	16.8	61.2	0	3	2	0	2	1708.85	4401.95	120000000	139	153
Mudpit_Aged_L3_4Left_IAF	Alpha-1-acid glycoprotein 1 OS=Homo sapiens GN=ORM1 PE=1 SV=1	P02763,V9HWF6	HEL-S-153w,ORM1	23512.1	7	11	34	SDVVYTDWK	K	K	0.997	76	25	17.8	76	0	6	0	0	2	1112.53	4092.74	683000000	171	179
Mudpit_Aged_L3_4Left_IAF	Alpha-1-acid glycoprotein 1 OS=Homo sapiens GN=ORM1 PE=1 SV=1	P02763,V9HWF6	HEL-S-153w,ORM1	23512.1	7	11	34	SVQEIQATFFYFTPNK	K	T	0.997	53.7	31.2	16.4	53.7	0	1	0	0	2	1919.95	8479.02	2370070	58	73
Mudpit_Aged_L3_4Left_IAF	Alpha-1-acid glycoprotein 1 OS=Homo sapiens GN=ORM1 PE=1 SV=1	P02763,V9HWF6	HEL-S-153w,ORM1	23512.1	7	11	34	TEDTIFLR	K	E	0.99	58.1	27.3	18.3	56.4	0	4	0	0	2	994.52	4361.17	170000000	74	81
Mudpit_Aged_L3_4Left_IAF	Alpha-1-acid glycoprotein 1 OS=Homo sapiens GN=ORM1 PE=1 SV=1	P02763,V9HWF6	HEL-S-153w,ORM1	23512.1	7	11	34	TYMLAFDVNDEK	K	N	0.997	65.1	25	17.1	65.1	0	12	0	0	2	1445.66	5805.66	135000000	127	138
Mudpit_Aged_L3_4Left_IAF	Alpha-1-acid glycoprotein 1 OS=Homo sapiens GN=ORM1 PE=1 SV=1	P02763,V9HWF6	HEL-S-153w,ORM1	23512.1	7	11	34	YVGGQEHFAHLLILR	R	D	0.997	80.3	27.8	18	80.3	0	1	1	2	2	1752.95	5171.43	123000000	109	123
Mudpit_Aged_L3_4Left_IAF	Peptidyl-prolyl cis-trans isomerase OS=Homo sapiens PE=2 SV=1	A8K486,B2RE56,P62937,V9HWF5	HEL-S-69p,PPIA	18012.9	3	4	9	EGMNIVEAMER	K	F	0.997	53.7	25	16.4	53.7	0	3	0	0	2	1278.58	5720.15	19500000	134	144
Mudpit_Aged_L3_4Left_IAF	Peptidyl-prolyl cis-trans isomerase OS=Homo sapiens PE=2 SV=1	A8K486,B2RE56,P62937,V9HWF5	HEL-S-69p,PPIA	18012.9	3	4	9	FEDENFILK	K	H	0.997	45.2	29.1	15.8	45.2	0	2	0	0	2	1154.57	5581.65	14500000	83	91
Mudpit_Aged_L3_4Left_IAF	Peptidyl-prolyl cis-trans isomerase OS=Homo sapiens PE=2 SV=1	A8K486,B2RE56,P62937,V9HWF5	HEL-S-69p,PPIA	18012.9	3	4	9	VSFELFADK	R	V	0.997	65.1	25	17.1	65.1	0	4	0	0	2	1055.54	6342.84	19400000	20	28
Mudpit_Aged_L3_4Left_IAF	Phosphoglycerate kinase 1 OS=Homo sapiens GN=PGK1 PE=1 SV=3	P00558,V9HWF4	HEL-S-68p,PGK1	44615.3	10	17	37	AHSSMVGVNLPQK	R	A	0.991	42.3	26.1	16.2	41.8	0	0	1	0	2	1367.71	2048.39	6730450	172	184
Mudpit_Aged_L3_4Left_IAF	Phosphoglycerate kinase 1 OS=Homo sapiens GN=PGK1 PE=1 SV=3	P00558,V9HWF4	HEL-S-68p,PGK1	44615.3	10	17	37	ALESPERPFLAILGGAK	K	V	0.997	55.7	25	16.5	55.7	0	1	1	0	2	1769	7112.88	53000000	200	216
Mudpit_Aged_L3_4Left_IAF	Phosphoglycerate kinase 1 OS=Homo sapiens GN=PGK1 PE=1 SV=3	P00558,V9HWF4	HEL-S-68p,PGK1	44615.3	10	17	37	ALMDEVVK	K	A	0.99	40.5	27.2	16.5	39.5	0	2	0	0	2	904.481	3146.4	15400000	354	361
Mudpit_Aged_L3_4Left_IAF	Phosphoglycerate kinase 1 OS=Homo sapiens GN=PGK1 PE=1 SV=3	P00558,V9HWF4	HEL-S-68p,PGK1	44615.3	10	17	37	IQLINNMLDK	K	V	0.997	52.6	28.1	19.5	49.4	0	5	0	0	2	1201.66	5731.92	46200000	221	230
Mudpit_Aged_L3_4Left_IAF	Phosphoglycerate kinase 1 OS=Homo sapiens GN=PGK1 PE=1 SV=3	P00558,V9HWF4	HEL-S-68p,PGK1	44615.3	10	17	37	ITLPVDFVTADK	K	F	0.997	65.6	25.8	17.1	65.6	0	5	0	0	2	1318.73	7299.69	34900000	280	291
Mudpit_Aged_L3_4Left_IAF	Phosphoglycerate kinase 1 OS=Homo sapiens GN=PGK1 PE=1 SV=3	P00558,V9HWF4	HEL-S-68p,PGK1	44615.3	10	17	37	LGDVYVNDAFGTAHR	K	A	0.997	106	26.5	19.6	106	0	1	2	0	2	1634.79	4609.37	34900000	157	171
Mudpit_Aged_L3_4Left_IAF	Phosphoglycerate kinase 1 OS=Homo sapiens GN=PGK1 PE=1 SV=3	P00558,V9HWF4	HEL-S-68p,PGK1	44615.3	10	17	37	VDFNVPMK	R	N	0.99	41.8	27.2	15.6	41.8	0	4	0	0	2	965.476	3719.59	25900000	23	30
Mudpit_Aged_L3_4Left_IAF	Phosphoglycerate kinase 1 OS=Homo sapiens GN=PGK1 PE=1 SV=3	P00558,V9HWF4	HEL-S-68p,PGK1	44615.3	10	17	37	VLNNMEIGTSLFDEEGAK	K	I	0.997	128	25	21	128	0	5	1	0	2	1982.94	7300.35	66300000	247	264
Mudpit_Aged_L3_4Left_IAF	Phosphoglycerate kinase 1 OS=Homo sapiens GN=PGK1 PE=1 SV=3	P00558,V9HWF4	HEL-S-68p,PGK1	44615.3	10	17	37	VSHVSTGGGASLELLEGK	K	V	0.997	66.9	26.9	21.8	62.3	0	2	4	0	2	1740.91	4236.71	41300000	389	406
Mudpit_Aged_L3_4Left_IAF	Phosphoglycerate kinase 1 OS=Homo sapiens GN=PGK1 PE=1 SV=3	P00558,V9HWF4	HEL-S-68p,PGK1	44615.3	10	17	37	YSLEPVAVELK	K	S	0.997	44.3	26.5	15.8	44.3	0	3	0	0	2	1247.69	5938.05	29800000	76	86
Mudpit_Aged_L3_4Left_IAF	Glutathione S-transferase P OS=Homo sapiens GN=GSTP1 PE=1 SV=2	P09211,V9HWE9	GSTP1,HEL-S-22	23356.7	5	6	13	ALPGQLKPFETLLSQNQGGK	K	T	0.993	43.3	25	15.7	43.3	0	0	2	0	2	2126.16	6862.15	16000000	122	141
Mudpit_Aged_L3_4Left_IAF	Glutathione S-transferase P OS=Homo sapiens GN=GSTP1 PE=1 SV=2	P09211,V9HWE9	GSTP1,HEL-S-22	23356.7	5	6	13	EEVVTVETWQEGSLK	K	A	0.997	73.3	29.2	17.6	73.3	0	3	0	0	2	1733.86	5855.31	10300000	31	45
Mudpit_Aged_L3_4Left_IAF	Glutathione S-transferase P OS=Homo sapiens GN=GSTP1 PE=1 SV=2	P09211,V9HWE9	GSTP1,HEL-S-22	23356.7	5	6	13	FQDGDLTLYQSNTILR	K	H	0.997	74.3	28.2	17.6	74.3	0	3	0	0	2	1883.95	6952.13	9096830	56	71
Mudpit_Aged_L3_4Left_IAF	Glutathione S-transferase P OS=Homo sapiens GN=GSTP1 PE=1 SV=2	P09211,V9HWE9	GSTP1,HEL-S-22	23356.7	5	6	13	MLLADQGQSWK	R	E	0.997	57	27.3	16.6	57	0	4	0	0	2	1276.64	4077.61	21900000	20	30
Mudpit_Aged_L3_4Left_IAF	Glutathione S-transferase P OS=Homo sapiens GN=GSTP1 PE=1 SV=2	P09211,V9HWE9	GSTP1,HEL-S-22	23356.7	5	6	13	PPYTVVYFPVR	M	G	0.997	47.9	25.7	16	47.9	0	1	0	0	1	1337.73	6669.6	4489810	2	12
Mudpit_Aged_L3_4Left_IAF	Rho GDP-dissociation inhibitor 1 OS=Homo sapiens GN=ARHGDIA PE=1 SV=1	J3KRE2,J3KTF8,J3QQX2,P52565,V9HWE8	ARHGDIA,HEL-S-47e	23207.5	2	2	2	AEEYEFLTPVEEAPK	R	G	0.997	73.1	25.5	17.6	73.1	0	1	0	0	2	1751.84	6542.42	5331940	153	167
Mudpit_Aged_L3_4Left_IAF	Rho GDP-dissociation inhibitor 1 OS=Homo sapiens GN=ARHGDIA PE=1 SV=1	J3KRE2,J3KTF8,J3QQX2,P52565,V9HWE8	ARHGDIA,HEL-S-47e	23207.5	2	2	2	TDYMVGSYGPR	K	A	0.997	50.9	25	16.2	50.9	0	1	0	0	2	1261.55	2785.26	4209350	142	152
Mudpit_Aged_L3_4Left_IAF	Inter-alpha-trypsin inhibitor heavy chain H1 OS=Homo sapiens GN=ITIH1 PE=1 SV=3	P19827	ITIH1	101390	19	32	74	AAISGENAGLVR	K	A	0.997	58.9	26.8	26.1	49.5	0	5	0	0	2	1157.63	2179.77	66700000	126	137
Mudpit_Aged_L3_4Left_IAF	Inter-alpha-trypsin inhibitor heavy chain H1 OS=Homo sapiens GN=ITIH1 PE=1 SV=3	P19827	ITIH1	101390	19	32	74	ADVQAHGEGQEFSITCLVDEEEMK	K	K	0.997	101	25	19.3	101	0	1	0	0	2	2723.18	6993.45	2543910	525	548
Mudpit_Aged_L3_4Left_IAF	Inter-alpha-trypsin inhibitor heavy chain H1 OS=Homo sapiens GN=ITIH1 PE=1 SV=3	P19827	ITIH1	101390	19	32	74	EVAFDLEIPK	R	T	0.997	50.2	27.2	16.1	50.2	0	3	0	0	2	1160.62	6805.32	34500000	84	93
Mudpit_Aged_L3_4Left_IAF	Inter-alpha-trypsin inhibitor heavy chain H1 OS=Homo sapiens GN=ITIH1 PE=1 SV=3	P19827	ITIH1	101390	19	32	74	FAHYVVTSQVVNTANEAR	R	E	0.997	87.8	26.5	18.5	87.8	0	3	5	0	2	2006.01	4126.43	68600000	66	83
Mudpit_Aged_L3_4Left_IAF	Inter-alpha-trypsin inhibitor heavy chain H1 OS=Homo sapiens GN=ITIH1 PE=1 SV=3	P19827	ITIH1	101390	19	32	74	GFSLDEATNLNGGLLR	R	G	0.997	129	27	21	129	0	6	2	0	2	1676.86	7426.88	66200000	361	376
Mudpit_Aged_L3_4Left_IAF	Inter-alpha-trypsin inhibitor heavy chain H1 OS=Homo sapiens GN=ITIH1 PE=1 SV=3	P19827	ITIH1	101390	19	32	74	GHMLENHVER	R	L	0.991	44.7	25.6	15.8	44.7	0	0	1	0	2	1221.58	1174.41	861526	555	564
Mudpit_Aged_L3_4Left_IAF	Inter-alpha-trypsin inhibitor heavy chain H1 OS=Homo sapiens GN=ITIH1 PE=1 SV=3	P19827	ITIH1	101390	19	32	74	GMADQDGLKPTIDKPSEDSPPLEMLGPR	R	R	0.997	79.6	25	18	79.6	0	0	3	3	2	2994.46	5797.89	23800000	613	640
Mudpit_Aged_L3_4Left_IAF	Inter-alpha-trypsin inhibitor heavy chain H1 OS=Homo sapiens GN=ITIH1 PE=1 SV=3	P19827	ITIH1	101390	19	32	74	GSLVQASEANLQAAQDFVR	K	G	0.997	151	26.5	22.4	151	0	5	2	0	2	2004.01	7347.04	40400000	342	360
Mudpit_Aged_L3_4Left_IAF	Inter-alpha-trypsin inhibitor heavy chain H1 OS=Homo sapiens GN=ITIH1 PE=1 SV=3	P19827	ITIH1	101390	19	32	74	GSSVHQDFLGFYVLDSHR	K	M	0.963	40.3	25.6	15.5	40.3	0	0	1	0	2	2063.99	6228.76	2613990	805	822
Mudpit_Aged_L3_4Left_IAF	Inter-alpha-trypsin inhibitor heavy chain H1 OS=Homo sapiens GN=ITIH1 PE=1 SV=3	P19827	ITIH1	101390	19	32	74	ILGDMQPGDYFDLVLFGTR	K	V	0.997	101	25.9	19.3	101	0	1	1	0	2	2173.06	9165.88	18900000	318	336
Mudpit_Aged_L3_4Left_IAF	Inter-alpha-trypsin inhibitor heavy chain H1 OS=Homo sapiens GN=ITIH1 PE=1 SV=3	P19827	ITIH1	101390	19	32	74	LDAQASFLPK	K	E	0.997	60.1	27.8	16.8	60.1	0	4	0	0	2	1089.59	4741.41	55300000	205	214
Mudpit_Aged_L3_4Left_IAF	Inter-alpha-trypsin inhibitor heavy chain H1 OS=Homo sapiens GN=ITIH1 PE=1 SV=3	P19827	ITIH1	101390	19	32	74	NHMQYEIVIK	R	V	0.997	53	26.6	18.3	51.1	0	4	1	0	2	1274.66	2084.58	46300000	171	180
Mudpit_Aged_L3_4Left_IAF	Inter-alpha-trypsin inhibitor heavy chain H1 OS=Homo sapiens GN=ITIH1 PE=1 SV=3	P19827	ITIH1	101390	19	32	74	QAVDTAVDGVFIR	R	S	0.997	99.3	27.5	19.2	99.3	0	4	2	0	2	1390.73	5690.38	94300000	42	54
Mudpit_Aged_L3_4Left_IAF	Inter-alpha-trypsin inhibitor heavy chain H1 OS=Homo sapiens GN=ITIH1 PE=1 SV=3	P19827	ITIH1	101390	19	32	74	QDGVVVTINK	R	K	0.997	48.5	27.5	16	48.5	0	1	0	0	2	1072.6	2631.83	3547670	772	781
Mudpit_Aged_L3_4Left_IAF	Inter-alpha-trypsin inhibitor heavy chain H1 OS=Homo sapiens GN=ITIH1 PE=1 SV=3	P19827	ITIH1	101390	19	32	74	QYYEGSEIVVAGR	K	I	0.997	68.8	25.7	17.3	68.8	0	3	1	0	2	1470.72	4265.15	29300000	502	514
Mudpit_Aged_L3_4Left_IAF	Inter-alpha-trypsin inhibitor heavy chain H1 OS=Homo sapiens GN=ITIH1 PE=1 SV=3	P19827	ITIH1	101390	19	32	74	TAFISDFAVTADGNAFIGDIK	K	D	0.997	125	26	20.8	125	0	2	0	0	2	2173.08	8983.96	44900000	94	114
Mudpit_Aged_L3_4Left_IAF	Inter-alpha-trypsin inhibitor heavy chain H1 OS=Homo sapiens GN=ITIH1 PE=1 SV=3	P19827	ITIH1	101390	19	32	74	TMEQFTIHLTVNPQSK	R	V	0.997	131	26.7	21.2	131	0	3	4	0	2	1889.94	4886	54700000	142	157
Mudpit_Aged_L3_4Left_IAF	Inter-alpha-trypsin inhibitor heavy chain H1 OS=Homo sapiens GN=ITIH1 PE=1 SV=3	P19827	ITIH1	101390	19	32	74	VTFQLTYEEVLK	K	R	0.997	67.4	25.8	17.2	67.4	0	2	0	0	2	1469.79	7263.86	56500000	158	169
Mudpit_Aged_L3_4Left_IAF	Inter-alpha-trypsin inhibitor heavy chain H1 OS=Homo sapiens GN=ITIH1 PE=1 SV=3	P19827	ITIH1	101390	19	32	74	VTFQLTYEEVLKR	K	N	0.989	39	25	15.4	39	0	0	1	0	2	1625.89	6194.5	8797750	158	170
Mudpit_Aged_L3_4Left_IAF	Carbonic anhydrase 1 (Fragment) OS=Homo sapiens GN=CA1 PE=1 SV=1	E5RHP7,P00915,V9HWE3	CA1,HEL-S-11	28870.4	4	4	6	ADGLAVIGVLMK	K	V	0.997	50.8	27.2	16.2	50.8	0	3	0	0	2	1186.69	8088.46	9045670	139	150
Mudpit_Aged_L3_4Left_IAF	Carbonic anhydrase 1 (Fragment) OS=Homo sapiens GN=CA1 PE=1 SV=1	E5RHP7,P00915,V9HWE3	CA1,HEL-S-11	28870.4	4	4	6	EIINVGHSFHVNFEDNDNR	K	S	0.956	32	25	15	32	0	0	0	1	2	2256.04	5280.61	8737210	59	77
Mudpit_Aged_L3_4Left_IAF	Carbonic anhydrase 1 (Fragment) OS=Homo sapiens GN=CA1 PE=1 SV=1	E5RHP7,P00915,V9HWE3	CA1,HEL-S-11	28870.4	4	4	6	ESISVSSEQLAQFR	K	S	0.997	102	30.1	19.4	102	0	1	0	0	2	1580.79	5609.92	7446430	215	228
Mudpit_Aged_L3_4Left_IAF	Carbonic anhydrase 1 (Fragment) OS=Homo sapiens GN=CA1 PE=1 SV=1	E5RHP7,P00915,V9HWE3	CA1,HEL-S-11	28870.4	4	4	6	VLDALQAIK	K	T	0.997	39.6	25	18.1	37	0	1	0	0	2	970.593	5005.48	6638650	161	169
Mudpit_Aged_L3_4Left_IAF	Vimentin OS=Homo sapiens GN=VIM PE=1 SV=4	P08670,V9HWE1	HEL113,VIM	53652.7	18	26	51	DGQVINETSQHHDDLE	R	-	0.994	31.5	25	15	31.5	0	1	0	0	2	1836.8	2004.26	2607600	451	466
Mudpit_Aged_L3_4Left_IAF	Vimentin OS=Homo sapiens GN=VIM PE=1 SV=4	P08670,V9HWE1	HEL113,VIM	53652.7	18	26	51	DNLAEDIMR	R	L	0.997	58.3	25	16.6	58.3	0	5	0	0	2	1076.5	3337.52	36800000	176	184
Mudpit_Aged_L3_4Left_IAF	Vimentin OS=Homo sapiens GN=VIM PE=1 SV=4	P08670,V9HWE1	HEL113,VIM	53652.7	18	26	51	EEAENTLQSFR	R	Q	0.997	81.2	25.1	18.1	81.2	0	1	0	0	2	1323.62	3399.2	6553060	197	207
Mudpit_Aged_L3_4Left_IAF	Vimentin OS=Homo sapiens GN=VIM PE=1 SV=4	P08670,V9HWE1	HEL113,VIM	53652.7	18	26	51	EMEENFAVEAANYQDTIGR	R	L	0.997	134	25	21.4	134	0	5	4	0	2	2202.96	6800.95	57100000	346	364
Mudpit_Aged_L3_4Left_IAF	Vimentin OS=Homo sapiens GN=VIM PE=1 SV=4	P08670,V9HWE1	HEL113,VIM	53652.7	18	26	51	EYQDLLNVK	R	M	0.997	42.9	27	15.7	0	0	3	0	0	2	1121.58	4792.42	84800000	382	390
Mudpit_Aged_L3_4Left_IAF	Vimentin OS=Homo sapiens GN=VIM PE=1 SV=4	P08670,V9HWE1	HEL113,VIM	53652.7	18	26	51	FADLSEAANR	K	N	0.997	57.2	29.4	19.2	54.6	0	2	0	0	2	1093.53	2611.24	58700000	295	304
Mudpit_Aged_L3_4Left_IAF	Vimentin OS=Homo sapiens GN=VIM PE=1 SV=4	P08670,V9HWE1	HEL113,VIM	53652.7	18	26	51	ILLAELEQLK	K	G	0.997	48	25	16	48	0	3	0	0	2	1169.71	7076.39	21300000	130	139
Mudpit_Aged_L3_4Left_IAF	Vimentin OS=Homo sapiens GN=VIM PE=1 SV=4	P08670,V9HWE1	HEL113,VIM	53652.7	18	26	51	ISLPLPNFSSLNLR	R	E	0.997	70.2	25	17.4	70.2	0	1	1	0	2	1570.9	8942.98	92800000	411	424
Mudpit_Aged_L3_4Left_IAF	Vimentin OS=Homo sapiens GN=VIM PE=1 SV=4	P08670,V9HWE1	HEL113,VIM	53652.7	18	26	51	LGDLYEEEMR	R	E	0.997	64.4	25	17	64.4	0	5	0	0	2	1254.57	4415.75	41000000	146	155
Mudpit_Aged_L3_4Left_IAF	Vimentin OS=Homo sapiens GN=VIM PE=1 SV=4	P08670,V9HWE1	HEL113,VIM	53652.7	18	26	51	LLQDSVDFSLADAINTEFK	R	N	0.997	93.7	25.9	18.9	93.7	0	1	0	0	2	2126.07	9035.34	1698680	79	97
Mudpit_Aged_L3_4Left_IAF	Vimentin OS=Homo sapiens GN=VIM PE=1 SV=4	P08670,V9HWE1	HEL113,VIM	53652.7	18	26	51	LQDEIQNMK	R	E	0.997	57.6	27.1	16.6	57.6	0	3	0	0	2	1118.55	2002.69	26900000	365	373
Mudpit_Aged_L3_4Left_IAF	Vimentin OS=Homo sapiens GN=VIM PE=1 SV=4	P08670,V9HWE1	HEL113,VIM	53652.7	18	26	51	LQEEMLQR	K	E	0.99	42	28.2	19.8	37.8	0	2	0	0	2	1046.53	2061.59	24900000	189	196
Mudpit_Aged_L3_4Left_IAF	Vimentin OS=Homo sapiens GN=VIM PE=1 SV=4	P08670,V9HWE1	HEL113,VIM	53652.7	18	26	51	MALDIEIATYR	K	K	0.997	76.2	26	29.9	0	0	2	0	0	2	1311.66	6307.07	23800000	391	401
Mudpit_Aged_L3_4Left_IAF	Vimentin OS=Homo sapiens GN=VIM PE=1 SV=4	P08670,V9HWE1	HEL113,VIM	53652.7	18	26	51	NLQEAEEWYK	K	S	0.997	61.2	25	16.8	61.2	0	4	0	0	2	1309.61	4583.48	31000000	283	292
Mudpit_Aged_L3_4Left_IAF	Vimentin OS=Homo sapiens GN=VIM PE=1 SV=4	P08670,V9HWE1	HEL113,VIM	53652.7	18	26	51	SLYASSPGGVYATR	R	S	0.997	55.3	25.2	16.5	55.3	0	1	0	0	2	1428.71	3455.59	48600000	51	64
Mudpit_Aged_L3_4Left_IAF	Vimentin OS=Homo sapiens GN=VIM PE=1 SV=4	P08670,V9HWE1	HEL113,VIM	53652.7	18	26	51	VELQELNDR	K	F	0.997	51	26.2	16.2	51	0	2	0	0	2	1115.57	2807.9	25400000	105	113
Mudpit_Aged_L3_4Left_IAF	Vimentin OS=Homo sapiens GN=VIM PE=1 SV=4	P08670,V9HWE1	HEL113,VIM	53652.7	18	26	51	VESLQEEIAFLK	K	K	0.997	80.1	27	33.6	64.5	0	3	1	0	2	1405.76	7284.92	48800000	224	235
Mudpit_Aged_L3_4Left_IAF	Vimentin OS=Homo sapiens GN=VIM PE=1 SV=4	P08670,V9HWE1	HEL113,VIM	53652.7	18	26	51	VEVERDNLAEDIMR	R	L	0.997	47	26.4	15.9	47	0	1	0	0	2	1688.83	4889.4	3195590	171	184
Mudpit_Aged_L3_4Left_IAF	Annexin A5 OS=Homo sapiens GN=ANXA5 PE=1 SV=2	P08758,V9HWE0	ANXA5,HEL-S-7	35938.6	13	22	48	DPDAGIDEAQVEQDAQALFQAGELK	R	W	0.997	136	25	21.5	136	0	2	2	0	2	2658.25	9100.09	14000000	162	186
Mudpit_Aged_L3_4Left_IAF	Annexin A5 OS=Homo sapiens GN=ANXA5 PE=1 SV=2	P08758,V9HWE0	ANXA5,HEL-S-7	35938.6	13	22	48	ETSGNLEQLLLAVVK	R	S	0.997	105	25.2	19.6	105	0	3	0	0	2	1613.91	9088.32	23200000	228	242
Mudpit_Aged_L3_4Left_IAF	Annexin A5 OS=Homo sapiens GN=ANXA5 PE=1 SV=2	P08758,V9HWE0	ANXA5,HEL-S-7	35938.6	13	22	48	FITIFGTR	K	S	0.99	37.9	25	20.3	33	0	1	0	0	2	954.541	6170.16	8878870	194	201
Mudpit_Aged_L3_4Left_IAF	Annexin A5 OS=Homo sapiens GN=ANXA5 PE=1 SV=2	P08758,V9HWE0	ANXA5,HEL-S-7	35938.6	13	22	48	GLGTDEESILTLLTSR	K	S	0.997	118	27.4	20.4	118	0	4	2	0	2	1704.9	9079.49	72100000	30	45
Mudpit_Aged_L3_4Left_IAF	Annexin A5 OS=Homo sapiens GN=ANXA5 PE=1 SV=2	P08758,V9HWE0	ANXA5,HEL-S-7	35938.6	13	22	48	GTVTDFPGFDER	R	A	0.997	54	25	16.4	54	0	3	0	0	2	1340.61	5549.88	42800000	7	18
Mudpit_Aged_L3_4Left_IAF	Annexin A5 OS=Homo sapiens GN=ANXA5 PE=1 SV=2	P08758,V9HWE0	ANXA5,HEL-S-7	35938.6	13	22	48	LYDAYELK	R	H	0.988	31.4	25	15	31.4	0	1	0	0	2	1014.51	3750.09	18700000	90	97
Mudpit_Aged_L3_4Left_IAF	Annexin A5 OS=Homo sapiens GN=ANXA5 PE=1 SV=2	P08758,V9HWE0	ANXA5,HEL-S-7	35938.6	13	22	48	MLVVLLQANR	R	D	0.997	52.1	25	16.3	52.1	0	1	0	0	2	1156.69	6041.08	6775360	152	161
Mudpit_Aged_L3_4Left_IAF	Annexin A5 OS=Homo sapiens GN=ANXA5 PE=1 SV=2	P08758,V9HWE0	ANXA5,HEL-S-7	35938.6	13	22	48	NFATSLYSMIK	K	G	0.997	42	31.8	15.6	42	0	2	0	0	2	1274.64	7727.19	16400000	291	301
Mudpit_Aged_L3_4Left_IAF	Annexin A5 OS=Homo sapiens GN=ANXA5 PE=1 SV=2	P08758,V9HWE0	ANXA5,HEL-S-7	35938.6	13	22	48	QVYEEEYGSSLEDDVVGDTSGYYQR	K	M	0.997	109	25	19.8	109	0	2	1	0	2	2888.24	7160.43	9341330	127	151
Mudpit_Aged_L3_4Left_IAF	Annexin A5 OS=Homo sapiens GN=ANXA5 PE=1 SV=2	P08758,V9HWE0	ANXA5,HEL-S-7	35938.6	13	22	48	SEIDLFNIR	R	K	0.997	58	28	21.9	52.7	0	4	0	0	2	1106.58	6829.66	27800000	277	285
Mudpit_Aged_L3_4Left_IAF	Annexin A5 OS=Homo sapiens GN=ANXA5 PE=1 SV=2	P08758,V9HWE0	ANXA5,HEL-S-7	35938.6	13	22	48	SIPAYLAETLYYAMK	R	G	0.997	84.6	27.3	18.3	84.6	0	4	3	0	2	1733.88	9055.61	76500000	246	260
Mudpit_Aged_L3_4Left_IAF	Annexin A5 OS=Homo sapiens GN=ANXA5 PE=1 SV=2	P08758,V9HWE0	ANXA5,HEL-S-7	35938.6	13	22	48	VLTEIIASR	K	T	0.997	52.8	25.9	16.4	52.8	0	3	0	0	2	1001.6	4159.97	44900000	109	117
Mudpit_Aged_L3_4Left_IAF	Annexin A5 OS=Homo sapiens GN=ANXA5 PE=1 SV=2	P08758,V9HWE0	ANXA5,HEL-S-7	35938.6	13	22	48	YMTISGFQIEETIDR	K	E	0.997	102	25.9	19.4	102	0	6	4	0	2	1802.86	6784.5	48200000	213	227
Mudpit_Aged_L3_4Left_IAF	Matrilin 2, isoform CRA_b OS=Homo sapiens GN=MATN2 PE=4 SV=1	A0A024R9B9,A0A024R9H1,A0A140VKH7_HUMAN,O00339	MATN2	106836	10	11	16	AAIVFTDGR	R	A	0.997	55.2	27	16.5	55.2	0	2	0	0	2	949.51	3032.09	19500000	762	770
Mudpit_Aged_L3_4Left_IAF	Matrilin 2, isoform CRA_b OS=Homo sapiens GN=MATN2 PE=4 SV=1	A0A024R9B9,A0A024R9H1,A0A140VKH7_HUMAN,O00339	MATN2	106836	10	11	16	ADLVFIIDSSR	R	S	0.997	49.9	35.5	16.1	49.9	0	1	0	0	2	1235.66	7132.05	14500000	56	66
Mudpit_Aged_L3_4Left_IAF	Matrilin 2, isoform CRA_b OS=Homo sapiens GN=MATN2 PE=4 SV=1	A0A024R9B9,A0A024R9H1,A0A140VKH7_HUMAN,O00339	MATN2	106836	10	11	16	AIEEELQEIASEPTNK	K	H	0.997	81	25.7	18.1	81	0	1	0	0	2	1800.89	6262.46	2699730	797	812
Mudpit_Aged_L3_4Left_IAF	Matrilin 2, isoform CRA_b OS=Homo sapiens GN=MATN2 PE=4 SV=1	A0A024R9B9,A0A024R9H1,A0A140VKH7_HUMAN,O00339	MATN2	106836	10	11	16	AQDDVSEWASK	R	A	0.997	47.2	25	16	47.2	0	1	0	0	2	1235.55	2681.93	12000000	771	781
Mudpit_Aged_L3_4Left_IAF	Matrilin 2, isoform CRA_b OS=Homo sapiens GN=MATN2 PE=4 SV=1	A0A024R9B9,A0A024R9H1,A0A140VKH7_HUMAN,O00339	MATN2	106836	10	11	16	GSMTGLALK	K	H	0.997	58.2	26.2	28.8	46	0	1	0	0	2	877.481	2630.64	4244040	731	739
Mudpit_Aged_L3_4Left_IAF	Matrilin 2, isoform CRA_b OS=Homo sapiens GN=MATN2 PE=4 SV=1	A0A024R9B9,A0A024R9H1,A0A140VKH7_HUMAN,O00339	MATN2	106836	10	11	16	HLFYAEDFSTMDEISEK	K	L	0.997	92.1	25	18.8	92.1	0	1	0	0	2	2061.91	6631.59	3234950	813	829
Mudpit_Aged_L3_4Left_IAF	Matrilin 2, isoform CRA_b OS=Homo sapiens GN=MATN2 PE=4 SV=1	A0A024R9B9,A0A024R9H1,A0A140VKH7_HUMAN,O00339	MATN2	106836	10	11	16	QFVTGIIDSLTISPK	K	A	0.997	76.7	25	17.8	76.7	0	2	1	0	2	1618.91	8501.61	17500000	676	690
Mudpit_Aged_L3_4Left_IAF	Matrilin 2, isoform CRA_b OS=Homo sapiens GN=MATN2 PE=4 SV=1	A0A024R9B9,A0A024R9H1,A0A140VKH7_HUMAN,O00339	MATN2	106836	10	11	16	SLGEENFEVVK	K	Q	0.997	51.7	26.3	16.2	51.7	0	1	0	0	2	1250.63	4563.52	30000000	665	675
Mudpit_Aged_L3_4Left_IAF	Matrilin 2, isoform CRA_b OS=Homo sapiens GN=MATN2 PE=4 SV=1	A0A024R9B9,A0A024R9H1,A0A140VKH7_HUMAN,O00339	MATN2	106836	10	11	16	VGLLQYGSTVK	R	N	0.997	63.6	25.8	17	63.6	0	4	0	0	2	1164.66	4481.02	26900000	96	106
Mudpit_Aged_L3_4Left_IAF	Matrilin 2, isoform CRA_b OS=Homo sapiens GN=MATN2 PE=4 SV=1	A0A024R9B9,A0A024R9H1,A0A140VKH7_HUMAN,O00339	MATN2	106836	10	11	16	YLFEEDNLLR	R	S	0.997	58.1	26.3	16.6	58.1	0	1	0	0	2	1311.66	6868.14	5642010	884	893
Mudpit_Aged_L3_4Left_IAF	Alpha-1B-glycoprotein OS=Homo sapiens GN=A1BG PE=1 SV=4	P04217,V9HWD8	A1BG,HEL-S-163pA	54253.3	8	11	26	ATWSGAVLAGR	R	D	0.997	49.9	28.4	16.1	49.9	0	4	0	0	2	1088.58	4161.5	46600000	407	417
Mudpit_Aged_L3_4Left_IAF	Alpha-1B-glycoprotein OS=Homo sapiens GN=A1BG PE=1 SV=4	P04217,V9HWD8	A1BG,HEL-S-163pA	54253.3	8	11	26	CLAPLEGAR	R	F	0.997	34	25	15.1	34	0	1	0	0	2	987.493	3656.99	5502210	325	333
Mudpit_Aged_L3_4Left_IAF	Alpha-1B-glycoprotein OS=Homo sapiens GN=A1BG PE=1 SV=4	P04217,V9HWD8	A1BG,HEL-S-163pA	54253.3	8	11	26	HQFLLTGDTQGR	K	Y	0.997	57.1	26.5	16.6	57.1	0	3	2	0	2	1372.7	2312.28	36700000	79	90
Mudpit_Aged_L3_4Left_IAF	Alpha-1B-glycoprotein OS=Homo sapiens GN=A1BG PE=1 SV=4	P04217,V9HWD8	A1BG,HEL-S-163pA	54253.3	8	11	26	LLELTGPK	K	S	0.99	55.6	25	22.5	49.6	0	4	0	0	2	870.53	3602.07	29400000	107	114
Mudpit_Aged_L3_4Left_IAF	Alpha-1B-glycoprotein OS=Homo sapiens GN=A1BG PE=1 SV=4	P04217,V9HWD8	A1BG,HEL-S-163pA	54253.3	8	11	26	NGVAQEPVHLDSPAIK	K	H	0.997	87.2	26.8	18.5	87.2	0	1	1	0	2	1674.88	3568.91	11900000	63	78
Mudpit_Aged_L3_4Left_IAF	Alpha-1B-glycoprotein OS=Homo sapiens GN=A1BG PE=1 SV=4	P04217,V9HWD8	A1BG,HEL-S-163pA	54253.3	8	11	26	SGLSTGWTQLSK	R	L	0.997	82.9	27	20.1	81	0	3	0	0	2	1264.65	4673.71	77300000	95	106
Mudpit_Aged_L3_4Left_IAF	Alpha-1B-glycoprotein OS=Homo sapiens GN=A1BG PE=1 SV=4	P04217,V9HWD8	A1BG,HEL-S-163pA	54253.3	8	11	26	SWVPHTFESELSDPVELLVAES	R	-	0.961	32.9	26.2	15.1	32.9	0	1	0	0	2	2471.2	9141.27	9938360	474	495
Mudpit_Aged_L3_4Left_IAF	Alpha-1B-glycoprotein OS=Homo sapiens GN=A1BG PE=1 SV=4	P04217,V9HWD8	A1BG,HEL-S-163pA	54253.3	8	11	26	TPGAAANLELIFVGPQHAGNYR	R	C	0.997	107	26	19.7	107	0	3	3	0	2	2296.18	6866.07	54000000	448	469
Mudpit_Aged_L3_4Left_IAF	FLJ00385 protein (Fragment) OS=Homo sapiens GN=FLJ00385 PE=1 SV=1	Q8NF17	FLJ00385	56110.1	3	4	10	EPQVYTLPPSREEMTK	R	N	0.997	53.7	31.5	16.4	53.7	0	10	0	0	2	1904.94	3802.77	88100000	338	353
Mudpit_Aged_L3_4Left_IAF	FLJ00385 protein (Fragment) OS=Homo sapiens GN=FLJ00385 PE=1 SV=1	Q8NF17	FLJ00385	56110.1	3	4	10	TPEVTCVVVDVSHEDPEVQFK	R	W	0.995	55.8	30.2	16.5	55.8	0	0	1	0	2	2415.14	7205.23	3273080	249	269
Mudpit_Aged_L3_4Left_IAF	FLJ00385 protein (Fragment) OS=Homo sapiens GN=FLJ00385 PE=1 SV=1	Q8NF17	FLJ00385	56110.1	3	4	10	TPLGDTTHTCPR	K	C	0.993	48.1	25	16	48.1	0	0	1	0	2	1356.62	1271.62	8160510	165	176
Mudpit_Aged_L3_4Left_IAF	FLJ00385 protein (Fragment) OS=Homo sapiens GN=FLJ00385 PE=1 SV=1	Q8NF17	FLJ00385	56110.1	3	4	10	WYVDGVEVHNAK	K	T	0.997	50	25.1	16.1	50	0	4	4	0	2	1416.69	3547.33	125000000	270	281
Mudpit_Aged_L3_4Left_IAF	Calcyphosin OS=Homo sapiens GN=CAPS PE=1 SV=1	K7EL21,Q13938,Q8NF12	CAPS,FLJ00390	20967.7	4	4	5	EAVIAAAFAK	R	L	0.987	31.1	27	14.9	31.1	0	1	0	0	2	990.562	4296.99	8277590	95	104
Mudpit_Aged_L3_4Left_IAF	Calcyphosin OS=Homo sapiens GN=CAPS PE=1 SV=1	K7EL21,Q13938,Q8NF12	CAPS,FLJ00390	20967.7	4	4	5	NGSGTLDLEEFLR	R	A	0.997	82.3	27.6	18.1	82.3	0	1	0	0	2	1450.72	7889.75	5518090	72	84
Mudpit_Aged_L3_4Left_IAF	Calcyphosin OS=Homo sapiens GN=CAPS PE=1 SV=1	K7EL21,Q13938,Q8NF12	CAPS,FLJ00390	20967.7	4	4	5	SGEWTEDEVLR	R	R	0.997	58.7	25	16.7	58.7	0	2	0	0	2	1320.61	4653.29	21400000	132	142
Mudpit_Aged_L3_4Left_IAF	Calcyphosin OS=Homo sapiens GN=CAPS PE=1 SV=1	K7EL21,Q13938,Q8NF12	CAPS,FLJ00390	20967.7	4	4	5	SLDADEFR	R	Q	0.99	54.3	25	17.6	53.1	0	1	0	0	2	952.437	2819.75	13400000	40	47
Mudpit_Aged_L3_4Left_IAF	Cartilage intermediate layer protein 1 OS=Homo sapiens GN=CILP PE=1 SV=4	O75339	CILP	132565	26	39	178	AETPYMVMNPETK	R	A	0.997	76.8	25	17.8	33.1	0	19	2	0	2	1526.69	3605.37	241000000	306	318
Mudpit_Aged_L3_4Left_IAF	Cartilage intermediate layer protein 1 OS=Homo sapiens GN=CILP PE=1 SV=4	O75339	CILP	132565	26	39	178	ASVTFLDPR	K	N	0.997	67.1	29.1	24.6	59.7	0	5	0	0	2	1005.54	4464.32	135000000	622	630
Mudpit_Aged_L3_4Left_IAF	Cartilage intermediate layer protein 1 OS=Homo sapiens GN=CILP PE=1 SV=4	O75339	CILP	132565	26	39	178	CSGMLYDQDR	K	V	0.989	28.1	25	14.8	28.1	0	1	0	0	2	1245.49	3084.36	7606450	1010	1019
Mudpit_Aged_L3_4Left_IAF	Cartilage intermediate layer protein 1 OS=Homo sapiens GN=CILP PE=1 SV=4	O75339	CILP	132565	26	39	178	DEVTSEPLNAGK	R	V	0.997	59.2	25	16.7	59.2	0	2	0	0	2	1259.61	2440.5	14600000	666	677
Mudpit_Aged_L3_4Left_IAF	Cartilage intermediate layer protein 1 OS=Homo sapiens GN=CILP PE=1 SV=4	O75339	CILP	132565	26	39	178	EIQCSGYTLPTK	R	V	0.997	45.4	25	15.8	45.4	0	2	0	0	2	1397.66	3921.39	12400000	464	475
Mudpit_Aged_L3_4Left_IAF	Cartilage intermediate layer protein 1 OS=Homo sapiens GN=CILP PE=1 SV=4	O75339	CILP	132565	26	39	178	EQRPGQNCSNYTVR	R	F	0.997	52.3	25	16.3	52.3	0	0	1	0	2	1709.77	1245.11	14400000	123	136
Mudpit_Aged_L3_4Left_IAF	Cartilage intermediate layer protein 1 OS=Homo sapiens GN=CILP PE=1 SV=4	O75339	CILP	132565	26	39	178	FAPIVLTMPK	K	T	0.997	45.8	25.4	15.9	45.8	0	4	0	0	2	1116.65	5897.83	79000000	282	291
Mudpit_Aged_L3_4Left_IAF	Cartilage intermediate layer protein 1 OS=Homo sapiens GN=CILP PE=1 SV=4	O75339	CILP	132565	26	39	178	FLPSEQIQGVVISVINLEPR	R	T	0.997	112	25	20	112	0	7	24	0	2	2238.25	9713.52	930000000	764	783
Mudpit_Aged_L3_4Left_IAF	Cartilage intermediate layer protein 1 OS=Homo sapiens GN=CILP PE=1 SV=4	O75339	CILP	132565	26	39	178	FNPNAIGVPQPYLNK	K	L	0.997	58	26.4	16.6	58	0	4	2	0	2	1671.89	6132.27	163000000	842	856
Mudpit_Aged_L3_4Left_IAF	Cartilage intermediate layer protein 1 OS=Homo sapiens GN=CILP PE=1 SV=4	O75339	CILP	132565	26	39	178	FYQIEGDR	R	Y	0.99	37.1	25	28.9	23.6	0	5	0	0	2	1027.48	2598.59	114000000	914	921
Mudpit_Aged_L3_4Left_IAF	Cartilage intermediate layer protein 1 OS=Homo sapiens GN=CILP PE=1 SV=4	O75339	CILP	132565	26	39	178	GTFTLHVPQDTER	K	L	0.997	77.9	25.3	17.9	77.9	0	7	6	0	2	1500.74	3744.69	442000000	524	536
Mudpit_Aged_L3_4Left_IAF	Cartilage intermediate layer protein 1 OS=Homo sapiens GN=CILP PE=1 SV=4	O75339	CILP	132565	26	39	178	IVGPLEVNVR	K	S	0.997	46	25	15.9	46	0	5	0	0	2	1095.65	4798.9	63600000	960	969
Mudpit_Aged_L3_4Left_IAF	Cartilage intermediate layer protein 1 OS=Homo sapiens GN=CILP PE=1 SV=4	O75339	CILP	132565	26	39	178	LFNLDVPESR	R	R	0.997	47.6	27.2	19	44.6	0	4	0	0	2	1189.62	5905.66	41000000	741	750
Mudpit_Aged_L3_4Left_IAF	Cartilage intermediate layer protein 1 OS=Homo sapiens GN=CILP PE=1 SV=4	O75339	CILP	132565	26	39	178	LPHDCFQNATNSFYYDVGR	R	C	0.983	36.6	25	15.3	36.6	0	0	1	0	2	2305	6248.71	5465570	413	431
Mudpit_Aged_L3_4Left_IAF	Cartilage intermediate layer protein 1 OS=Homo sapiens GN=CILP PE=1 SV=4	O75339	CILP	132565	26	39	178	LVLTFVDR	R	L	0.99	55.5	25.1	16.5	55.5	0	10	0	0	2	962.567	5785.09	358000000	537	544
Mudpit_Aged_L3_4Left_IAF	Cartilage intermediate layer protein 1 OS=Homo sapiens GN=CILP PE=1 SV=4	O75339	CILP	132565	26	39	178	LWSLNPDTGLWEEEGDFK	K	F	0.997	105	31	19.5	105	0	8	3	0	2	2135.99	8869.04	107000000	698	715
Mudpit_Aged_L3_4Left_IAF	Cartilage intermediate layer protein 1 OS=Homo sapiens GN=CILP PE=1 SV=4	O75339	CILP	132565	26	39	178	QSAFQYLQSTPAQSPAAGTVQGR	R	V	0.997	124	26.3	21.8	123	0	5	4	0	2	2393.18	5691.16	77900000	1127	1149
Mudpit_Aged_L3_4Left_IAF	Cartilage intermediate layer protein 1 OS=Homo sapiens GN=CILP PE=1 SV=4	O75339	CILP	132565	26	39	178	RLFNLDVPESR	R	R	0.991	46.9	30.7	16.1	46.8	0	0	1	0	2	1345.72	4858.09	3422420	740	750
Mudpit_Aged_L3_4Left_IAF	Cartilage intermediate layer protein 1 OS=Homo sapiens GN=CILP PE=1 SV=4	O75339	CILP	132565	26	39	178	SNVGVALTFNCVER	K	Q	0.997	60.7	25	16.8	60.7	0	8	0	0	2	1566.76	5867.81	229000000	1109	1122
Mudpit_Aged_L3_4Left_IAF	Cartilage intermediate layer protein 1 OS=Homo sapiens GN=CILP PE=1 SV=4	O75339	CILP	132565	26	39	178	TFLVGNLEIR	R	E	0.997	59.4	25.6	16.7	59.4	0	6	0	0	2	1161.66	6674.81	62800000	728	737
Mudpit_Aged_L3_4Left_IAF	Cartilage intermediate layer protein 1 OS=Homo sapiens GN=CILP PE=1 SV=4	O75339	CILP	132565	26	39	178	TGFLSNPR	R	A	0.99	42.3	25	17.6	40.3	0	2	0	0	2	891.468	1982.7	192000000	784	791
Mudpit_Aged_L3_4Left_IAF	Cartilage intermediate layer protein 1 OS=Homo sapiens GN=CILP PE=1 SV=4	O75339	CILP	132565	26	39	178	TTDWTPAGSTGQVVHGSPR	R	E	0.997	119	25.6	21.6	118	0	4	14	0	2	1953.94	2920.49	680000000	96	114
Mudpit_Aged_L3_4Left_IAF	Cartilage intermediate layer protein 1 OS=Homo sapiens GN=CILP PE=1 SV=4	O75339	CILP	132565	26	39	178	TYGMFSVDFR	R	D	0.997	83.5	25	18.2	83.5	0	5	0	0	2	1238.55	6815.19	30400000	656	665
Mudpit_Aged_L3_4Left_IAF	Cartilage intermediate layer protein 1 OS=Homo sapiens GN=CILP PE=1 SV=4	O75339	CILP	132565	26	39	178	TYGMFSVDFRDEVTSEPLNAGK	R	V	0.979	35.3	25.4	15.2	35.3	0	0	2	0	2	2463.15	7374.58	20000000	656	677
Mudpit_Aged_L3_4Left_IAF	Cartilage intermediate layer protein 1 OS=Homo sapiens GN=CILP PE=1 SV=4	O75339	CILP	132565	26	39	178	VAQLIVIASDETPCNPVPESYLIR	K	L	0.997	70.9	26.8	17.4	70.9	0	2	2	0	2	2685.38	8906.54	23800000	389	412
Mudpit_Aged_L3_4Left_IAF	Cartilage intermediate layer protein 1 OS=Homo sapiens GN=CILP PE=1 SV=4	O75339	CILP	132565	26	39	178	VAQQPLIN	R	-	0.99	34.9	25	15.2	34.9	0	1	0	0	2	882.504	2833.66	8707780	1177	1184
Mudpit_Aged_L3_4Left_IAF	Superoxide dismutase [Cu-Zn] OS=Homo sapiens GN=SOD1 PE=1 SV=2	P00441,V9HWC9	HEL-S-44,SOD1	15935.3	2	3	4	GDGPVQGIINFEQK	K	E	0.997	49.2	27.6	16.1	49.2	0	2	0	0	2	1501.76	6029.9	11900000	11	24
Mudpit_Aged_L3_4Left_IAF	Superoxide dismutase [Cu-Zn] OS=Homo sapiens GN=SOD1 PE=1 SV=2	P00441,V9HWC9	HEL-S-44,SOD1	15935.3	2	3	4	HVGDLGNVTADKDGVADVSIEDSVISLSGDHCIIGR	R	T	0.991	78.6	25.1	17.9	78.6	0	0	0	1	2	3721.8	7475.12	28200000	81	116
Mudpit_Aged_L3_4Left_IAF	Peroxiredoxin-6 OS=Homo sapiens GN=PRDX6 PE=1 SV=3	P30041,V9HWC7	HEL-S-128m,PRDX6	25036.1	6	6	9	DGDSVMVLPTIPEEEAK	K	K	0.973	26.3	26.7	14.6	26.3	0	1	0	0	2	1829.88	7501.83	2778570	183	199
Mudpit_Aged_L3_4Left_IAF	Peroxiredoxin-6 OS=Homo sapiens GN=PRDX6 PE=1 SV=3	P30041,V9HWC7	HEL-S-128m,PRDX6	25036.1	6	6	9	DINAYNCEEPTEK	K	L	0.996	39.5	25	15.5	39.5	0	1	0	0	2	1583.65	2547.3	1267250	85	97
Mudpit_Aged_L3_4Left_IAF	Peroxiredoxin-6 OS=Homo sapiens GN=PRDX6 PE=1 SV=3	P30041,V9HWC7	HEL-S-128m,PRDX6	25036.1	6	6	9	ELAILLGMLDPAEKDEK	R	G	0.945	30.2	26.1	14.9	30.2	0	0	1	0	2	1885	8529.15	2248570	109	125
Mudpit_Aged_L3_4Left_IAF	Peroxiredoxin-6 OS=Homo sapiens GN=PRDX6 PE=1 SV=3	P30041,V9HWC7	HEL-S-128m,PRDX6	25036.1	6	6	9	LPFPIIDDR	K	N	0.997	56.6	25.7	17.5	55.7	0	3	0	0	2	1085.6	7045.04	23500000	98	106
Mudpit_Aged_L3_4Left_IAF	Peroxiredoxin-6 OS=Homo sapiens GN=PRDX6 PE=1 SV=3	P30041,V9HWC7	HEL-S-128m,PRDX6	25036.1	6	6	9	VATPVDWK	R	D	0.99	47.8	26.6	16	47.8	0	2	0	0	2	915.494	3129.47	9170940	175	182
Mudpit_Aged_L3_4Left_IAF	Peroxiredoxin-6 OS=Homo sapiens GN=PRDX6 PE=1 SV=3	P30041,V9HWC7	HEL-S-128m,PRDX6	25036.1	6	6	9	VVFVFGPDK	R	K	0.997	35	27.1	15.2	35	0	1	0	0	2	1007.56	5671.77	6746970	133	141
Mudpit_Aged_L3_4Left_IAF	Peptidyl-prolyl cis-trans isomerase B OS=Homo sapiens GN=PPIB PE=1 SV=2	P23284,V9HWC6	HEL-S-39,PPIB	23743.2	3	3	4	DFMIQGGDFTR	K	G	0.997	59.4	25	16.7	59.4	0	1	0	0	2	1286.58	6224.08	14500000	99	109
Mudpit_Aged_L3_4Left_IAF	Peptidyl-prolyl cis-trans isomerase B OS=Homo sapiens GN=PPIB PE=1 SV=2	P23284,V9HWC6	HEL-S-39,PPIB	23743.2	3	3	4	TVDNFVALATGEK	K	G	0.997	62.5	27.1	16.9	62.5	0	2	0	0	2	1364.71	6109.84	29800000	72	84
Mudpit_Aged_L3_4Left_IAF	Peptidyl-prolyl cis-trans isomerase B OS=Homo sapiens GN=PPIB PE=1 SV=2	P23284,V9HWC6	HEL-S-39,PPIB	23743.2	3	3	4	VIFGLFGK	R	T	0.99	47.2	25	21.1	42	0	1	0	0	2	880.529	6990.69	6418890	60	67
Mudpit_Aged_L3_4Left_IAF	Protein deglycase DJ-1 OS=Homo sapiens GN=PARK7 PE=1 SV=2	Q99497,V9HWC2	HEL-S-67p,PARK7	19891.2	3	5	6	EGPYDVVVLPGGNLGAQNLSESAAVK	K	E	0.997	65.9	26.4	17.1	65.9	0	1	1	0	2	2584.33	7868.25	10000000	64	89
Mudpit_Aged_L3_4Left_IAF	Protein deglycase DJ-1 OS=Homo sapiens GN=PARK7 PE=1 SV=2	Q99497,V9HWC2	HEL-S-67p,PARK7	19891.2	3	5	6	GAEEMETVIPVDVMR	K	R	0.997	78.6	25	17.9	78.6	0	2	0	0	2	1675.8	6725.66	6415030	13	27
Mudpit_Aged_L3_4Left_IAF	Protein deglycase DJ-1 OS=Homo sapiens GN=PARK7 PE=1 SV=2	Q99497,V9HWC2	HEL-S-67p,PARK7	19891.2	3	5	6	KEGPYDVVVLPGGNLGAQNLSESAAVK	K	E	0.996	59.4	26.2	16.7	59.4	0	0	2	0	2	2712.42	6627.87	2846450	63	89
Mudpit_Aged_L3_4Left_IAF	Moesin OS=Homo sapiens GN=MSN PE=1 SV=3	P26038,V9HWC0	HEL70,MSN	67821.8	6	7	10	EDAVLEYLK	R	I	0.997	59.2	25.9	16.7	59.2	0	2	0	0	2	1079.56	5985.77	21900000	185	193
Mudpit_Aged_L3_4Left_IAF	Moesin OS=Homo sapiens GN=MSN PE=1 SV=3	P26038,V9HWC0	HEL70,MSN	67821.8	6	7	10	EVWFFGLQYQDTK	R	G	0.997	53.7	25.2	16.4	53.7	0	2	0	0	2	1660.8	8837.01	8384160	41	53
Mudpit_Aged_L3_4Left_IAF	Moesin OS=Homo sapiens GN=MSN PE=1 SV=3	P26038,V9HWC0	HEL70,MSN	67821.8	6	7	10	FYPEDVSEELIQDITQR	K	L	0.997	101	25.7	19.3	101	0	1	1	0	2	2082	9080.23	16300000	84	100
Mudpit_Aged_L3_4Left_IAF	Moesin OS=Homo sapiens GN=MSN PE=1 SV=3	P26038,V9HWC0	HEL70,MSN	67821.8	6	7	10	IAQDLEMYGVNYFSIK	K	N	0.997	63.3	27	17	63.3	0	1	0	0	2	1890.93	8277.91	1988650	194	209
Mudpit_Aged_L3_4Left_IAF	Moesin OS=Homo sapiens GN=MSN PE=1 SV=3	P26038,V9HWC0	HEL70,MSN	67821.8	6	7	10	IGFPWSEIR	K	N	0.997	43.4	27.3	17.5	41.6	0	2	0	0	2	1104.58	7143.14	24800000	238	246
Mudpit_Aged_L3_4Left_IAF	Moesin OS=Homo sapiens GN=MSN PE=1 SV=3	P26038,V9HWC0	HEL70,MSN	67821.8	6	7	10	QLFDQVVK	K	T	0.99	41.8	28	26.2	31.2	0	1	0	0	2	976.546	4270.83	15000000	28	35
Mudpit_Aged_L3_4Left_IAF	L-lactate dehydrogenase A chain OS=Homo sapiens GN=LDHA PE=1 SV=2	P00338,V9HWB9	HEL-S-133P,LDHA	36689.2	7	10	19	DLADELALVDVIEDK	K	L	0.997	87.9	26.5	18.5	87.9	0	2	1	0	2	1657.85	9163.03	12500000	43	57
Mudpit_Aged_L3_4Left_IAF	L-lactate dehydrogenase A chain OS=Homo sapiens GN=LDHA PE=1 SV=2	P00338,V9HWB9	HEL-S-133P,LDHA	36689.2	7	10	19	DQLIYNLLK	K	E	0.981	26.3	25	14.6	26.3	0	3	0	0	2	1119.64	7428.47	16900000	6	14
Mudpit_Aged_L3_4Left_IAF	L-lactate dehydrogenase A chain OS=Homo sapiens GN=LDHA PE=1 SV=2	P00338,V9HWB9	HEL-S-133P,LDHA	36689.2	7	10	19	GEMMDLQHGSLFLR	K	T	0.997	78.2	25.4	17.9	78.2	0	2	1	0	2	1633.78	5401.93	18100000	60	73
Mudpit_Aged_L3_4Left_IAF	L-lactate dehydrogenase A chain OS=Homo sapiens GN=LDHA PE=1 SV=2	P00338,V9HWB9	HEL-S-133P,LDHA	36689.2	7	10	19	QVVESAYEVIK	K	L	0.997	64	26.6	17	64	0	2	0	0	2	1264.68	4370.3	36000000	233	243
Mudpit_Aged_L3_4Left_IAF	L-lactate dehydrogenase A chain OS=Homo sapiens GN=LDHA PE=1 SV=2	P00338,V9HWB9	HEL-S-133P,LDHA	36689.2	7	10	19	SADTLWGIQK	K	E	0.997	57.1	27.4	16.6	57.1	0	4	0	0	2	1118.58	4676.83	35300000	319	328
Mudpit_Aged_L3_4Left_IAF	L-lactate dehydrogenase A chain OS=Homo sapiens GN=LDHA PE=1 SV=2	P00338,V9HWB9	HEL-S-133P,LDHA	36689.2	7	10	19	VIGSGCNLDSAR	R	F	0.997	61	25.8	21.9	55.9	0	3	0	0	2	1249.58	2160.29	13200000	158	169
Mudpit_Aged_L3_4Left_IAF	L-lactate dehydrogenase A chain OS=Homo sapiens GN=LDHA PE=1 SV=2	P00338,V9HWB9	HEL-S-133P,LDHA	36689.2	7	10	19	VTLTSEEEAR	K	L	0.997	64.8	28.3	21.2	60.7	0	1	0	0	2	1134.56	1479.91	34300000	306	315
Mudpit_Aged_L3_4Left_IAF	Pyruvate kinase PKM OS=Homo sapiens GN=PKM PE=1 SV=4	P14618,V9HWB8	HEL-S-30,PKM	57937.5	15	24	41	APIIAVTR	R	N	0.987	27.8	25	14.7	27.8	0	1	0	0	2	840.53	2467.14	4502900	448	455
Mudpit_Aged_L3_4Left_IAF	Pyruvate kinase PKM OS=Homo sapiens GN=PKM PE=1 SV=4	P14618,V9HWB8	HEL-S-30,PKM	57937.5	15	24	41	DPVQEAWAEDVDLR	K	V	0.997	78.1	25.1	17.9	78.1	0	2	1	0	2	1642.77	7130.46	14300000	476	489
Mudpit_Aged_L3_4Left_IAF	Pyruvate kinase PKM OS=Homo sapiens GN=PKM PE=1 SV=4	P14618,V9HWB8	HEL-S-30,PKM	57937.5	15	24	41	EAEAAIYHLQLFEELR	R	R	0.997	104	26.9	19.5	104	0	1	2	0	2	1931.99	7720.12	29500000	384	399
Mudpit_Aged_L3_4Left_IAF	Pyruvate kinase PKM OS=Homo sapiens GN=PKM PE=1 SV=4	P14618,V9HWB8	HEL-S-30,PKM	57937.5	15	24	41	FDEILEASDGIMVAR	R	G	0.997	63.2	26.5	17	63.2	0	1	0	0	2	1665.82	7403.33	3484000	280	294
Mudpit_Aged_L3_4Left_IAF	Pyruvate kinase PKM OS=Homo sapiens GN=PKM PE=1 SV=4	P14618,V9HWB8	HEL-S-30,PKM	57937.5	15	24	41	GADFLVTEVENGGSLGSK	K	K	0.997	63.7	30.3	17	63.7	0	3	0	0	2	1779.88	6862.27	12700000	189	206
Mudpit_Aged_L3_4Left_IAF	Pyruvate kinase PKM OS=Homo sapiens GN=PKM PE=1 SV=4	P14618,V9HWB8	HEL-S-30,PKM	57937.5	15	24	41	GDLGIEIPAEK	R	V	0.997	48.3	27	22.1	42.3	0	2	0	0	2	1141.61	5124.89	36600000	295	305
Mudpit_Aged_L3_4Left_IAF	Pyruvate kinase PKM OS=Homo sapiens GN=PKM PE=1 SV=4	P14618,V9HWB8	HEL-S-30,PKM	57937.5	15	24	41	GVNLPGAAVDLPAVSEK	K	D	0.997	69.1	26.1	17.3	69.1	0	1	1	0	2	1636.89	6460.36	33500000	208	224
Mudpit_Aged_L3_4Left_IAF	Pyruvate kinase PKM OS=Homo sapiens GN=PKM PE=1 SV=4	P14618,V9HWB8	HEL-S-30,PKM	57937.5	15	24	41	ITLDNAYMEK	K	C	0.997	55.6	25.4	16.5	55.6	0	3	0	0	2	1197.58	2849.94	26100000	142	151
Mudpit_Aged_L3_4Left_IAF	Pyruvate kinase PKM OS=Homo sapiens GN=PKM PE=1 SV=4	P14618,V9HWB8	HEL-S-30,PKM	57937.5	15	24	41	IYVDDGLISLQVK	K	Q	0.997	92.4	25.1	18.8	92.4	0	1	0	0	2	1462.82	7233.66	9558520	174	186
Mudpit_Aged_L3_4Left_IAF	Pyruvate kinase PKM OS=Homo sapiens GN=PKM PE=1 SV=4	P14618,V9HWB8	HEL-S-30,PKM	57937.5	15	24	41	LAPITSDPTEATAVGAVEASFK	R	C	0.997	141	26.7	21.8	141	0	2	3	0	2	2175.12	7932.18	50900000	401	422
Mudpit_Aged_L3_4Left_IAF	Pyruvate kinase PKM OS=Homo sapiens GN=PKM PE=1 SV=4	P14618,V9HWB8	HEL-S-30,PKM	57937.5	15	24	41	LDIDSPPITAR	R	N	0.997	54.8	26.3	16.4	54.8	0	1	0	0	2	1197.65	4759.44	6775980	33	43
Mudpit_Aged_L3_4Left_IAF	Pyruvate kinase PKM OS=Homo sapiens GN=PKM PE=1 SV=4	P14618,V9HWB8	HEL-S-30,PKM	57937.5	15	24	41	LNFSHGTHEYHAETIK	R	N	0.997	79.5	26	18	79.5	0	0	1	1	2	1883.9	1290.22	104000000	74	89
Mudpit_Aged_L3_4Left_IAF	Pyruvate kinase PKM OS=Homo sapiens GN=PKM PE=1 SV=4	P14618,V9HWB8	HEL-S-30,PKM	57937.5	15	24	41	NTGIICTIGPASR	R	S	0.952	24.8	26.8	14.5	24.8	0	1	0	0	2	1360.69	5617.86	19200000	44	56
Mudpit_Aged_L3_4Left_IAF	Pyruvate kinase PKM OS=Homo sapiens GN=PKM PE=1 SV=4	P14618,V9HWB8	HEL-S-30,PKM	57937.5	15	24	41	RFDEILEASDGIMVAR	R	G	0.997	110	26.9	19.9	110	0	2	4	0	2	1821.92	6671.66	49100000	279	294
Mudpit_Aged_L3_4Left_IAF	Pyruvate kinase PKM OS=Homo sapiens GN=PKM PE=1 SV=4	P14618,V9HWB8	HEL-S-30,PKM	57937.5	15	24	41	TATESFASDPILYRPVAVALDTK	R	G	0.997	87.6	25.7	18.5	87.6	0	1	6	0	2	2465.29	7532.42	46800000	93	115
Mudpit_Aged_L3_4Left_IAF	78 kDa glucose-regulated protein OS=Homo sapiens GN=HSPA5 PE=1 SV=2	P11021,V9HWB4	HEL-S-89n,HSPA5	72334.7	14	19	24	DAGTIAGLNVMR	K	I	0.997	50.9	31.6	16.2	50.9	0	2	0	0	2	1233.63	5037.57	9734600	186	197
Mudpit_Aged_L3_4Left_IAF	78 kDa glucose-regulated protein OS=Homo sapiens GN=HSPA5 PE=1 SV=2	P11021,V9HWB4	HEL-S-89n,HSPA5	72334.7	14	19	24	FEELNMDLFR	K	S	0.997	57	25	16.6	57	0	2	0	0	2	1313.62	6990.77	16800000	327	336
Mudpit_Aged_L3_4Left_IAF	78 kDa glucose-regulated protein OS=Homo sapiens GN=HSPA5 PE=1 SV=2	P11021,V9HWB4	HEL-S-89n,HSPA5	72334.7	14	19	24	IEIESFYEGEDFSETLTR	R	A	0.997	58.5	25	16.7	58.5	0	0	1	0	2	2164.99	8333.71	2949920	307	324
Mudpit_Aged_L3_4Left_IAF	78 kDa glucose-regulated protein OS=Homo sapiens GN=HSPA5 PE=1 SV=2	P11021,V9HWB4	HEL-S-89n,HSPA5	72334.7	14	19	24	IEWLESHQDADIEDFK	K	A	0.997	96.4	25	19	96.4	0	1	2	0	2	1974.91	6283.15	23700000	602	617
Mudpit_Aged_L3_4Left_IAF	78 kDa glucose-regulated protein OS=Homo sapiens GN=HSPA5 PE=1 SV=2	P11021,V9HWB4	HEL-S-89n,HSPA5	72334.7	14	19	24	IINEPTAAAIAYGLDK	R	R	0.997	90.2	26.7	18.6	90.2	0	2	1	0	2	1659.9	6525.23	19000000	198	213
Mudpit_Aged_L3_4Left_IAF	78 kDa glucose-regulated protein OS=Homo sapiens GN=HSPA5 PE=1 SV=2	P11021,V9HWB4	HEL-S-89n,HSPA5	72334.7	14	19	24	ITPSYVAFTPEGER	R	L	0.997	46.8	26.9	15.9	46.8	0	1	0	0	2	1566.78	5298.31	26500000	61	74
Mudpit_Aged_L3_4Left_IAF	78 kDa glucose-regulated protein OS=Homo sapiens GN=HSPA5 PE=1 SV=2	P11021,V9HWB4	HEL-S-89n,HSPA5	72334.7	14	19	24	LYGSAGPPPTGEEDTAEKDEL	K	-	0.997	51	25	16.2	51	0	1	0	0	2	2175.99	4735.07	1470830	634	654
Mudpit_Aged_L3_4Left_IAF	78 kDa glucose-regulated protein OS=Homo sapiens GN=HSPA5 PE=1 SV=2	P11021,V9HWB4	HEL-S-89n,HSPA5	72334.7	14	19	24	NQLTSNPENTVFDAK	K	R	0.997	88.8	26.6	18.5	88.8	0	2	0	0	2	1677.81	4444.43	10900000	82	96
Mudpit_Aged_L3_4Left_IAF	78 kDa glucose-regulated protein OS=Homo sapiens GN=HSPA5 PE=1 SV=2	P11021,V9HWB4	HEL-S-89n,HSPA5	72334.7	14	19	24	SDIDEIVLVGGSTR	K	I	0.997	80.6	27.3	18	80.6	0	1	0	0	2	1460.76	6297.82	7500460	354	367
Mudpit_Aged_L3_4Left_IAF	78 kDa glucose-regulated protein OS=Homo sapiens GN=HSPA5 PE=1 SV=2	P11021,V9HWB4	HEL-S-89n,HSPA5	72334.7	14	19	24	SQIFSTASDNQPTVTIK	K	V	0.997	52.8	26.5	16.3	52.8	0	1	0	0	2	1836.93	5047.35	4676190	448	464
Mudpit_Aged_L3_4Left_IAF	78 kDa glucose-regulated protein OS=Homo sapiens GN=HSPA5 PE=1 SV=2	P11021,V9HWB4	HEL-S-89n,HSPA5	72334.7	14	19	24	TFAPEEISAMVLTK	K	M	0.981	34.3	26.9	15.1	34.3	0	1	1	0	2	1552.79	7157.45	4760640	139	152
Mudpit_Aged_L3_4Left_IAF	78 kDa glucose-regulated protein OS=Homo sapiens GN=HSPA5 PE=1 SV=2	P11021,V9HWB4	HEL-S-89n,HSPA5	72334.7	14	19	24	TWNDPSVQQDIK	R	F	0.997	52.9	26.2	16.3	52.9	0	2	0	0	2	1430.69	3739.46	10800000	102	113
Mudpit_Aged_L3_4Left_IAF	78 kDa glucose-regulated protein OS=Homo sapiens GN=HSPA5 PE=1 SV=2	P11021,V9HWB4	HEL-S-89n,HSPA5	72334.7	14	19	24	VEIIANDQGNR	R	I	0.997	63.9	26	19.8	0	0	2	0	0	2	1228.63	1780.19	44900000	50	60
Mudpit_Aged_L3_4Left_IAF	78 kDa glucose-regulated protein OS=Homo sapiens GN=HSPA5 PE=1 SV=2	P11021,V9HWB4	HEL-S-89n,HSPA5	72334.7	14	19	24	VTHAVVTVPAYFNDAQR	K	Q	0.995	49	27	16.1	49	0	0	1	0	2	1887.97	4899.43	6457230	165	181
Mudpit_Aged_L3_4Left_IAF	Mannose-binding protein C OS=Homo sapiens GN=MBL2 PE=1 SV=2	P11226	MBL2	26144.1	2	2	4	LTYTNWNEGEPNNAGSDEDCVLLLK	R	N	0.997	75.2	26.9	17.7	75.2	0	2	0	0	2	2853.29	7615.88	5053650	203	227
Mudpit_Aged_L3_4Left_IAF	Mannose-binding protein C OS=Homo sapiens GN=MBL2 PE=1 SV=2	P11226	MBL2	26144.1	2	2	4	TEGQFVDLTGNR	K	L	0.997	79.9	26.6	18	79.9	0	2	0	0	2	1336.65	4218.22	18600000	191	202
Mudpit_Aged_L3_4Left_IAF	Phosphatidylinositol-glycan-specific phospholipase D OS=Homo sapiens GN=GPLD1 PE=1 SV=3	P80108	GPLD1	92338.9	3	3	3	GIVAAFYSGPSLSDK	K	E	0.997	36.3	26.8	15.3	36.3	0	1	0	0	2	1511.77	6523.28	4903330	545	559
Mudpit_Aged_L3_4Left_IAF	Phosphatidylinositol-glycan-specific phospholipase D OS=Homo sapiens GN=GPLD1 PE=1 SV=3	P80108	GPLD1	92338.9	3	3	3	IADVTSGLIGGEDGR	R	V	0.997	88.8	34.3	18.5	88.8	0	1	0	0	2	1459.74	5124.12	15200000	743	757
Mudpit_Aged_L3_4Left_IAF	Phosphatidylinositol-glycan-specific phospholipase D OS=Homo sapiens GN=GPLD1 PE=1 SV=3	P80108	GPLD1	92338.9	3	3	3	LSGALHVYSLGSD	R	-	0.997	40	27.9	15.5	40	0	1	0	0	2	1318.66	5395.14	3630860	828	840
Mudpit_Aged_L3_4Left_IAF	cDNA, FLJ96923, highly similar to Homo sapiens ribophorin II (RPN2), mRNA OS=Homo sapiens PE=2 SV=1	B2RE46,P04844	RPN2	69284.8	2	2	3	EETVLATVQALQTASHLSQQADLR	K	S	0.986	42.2	25.5	15.6	42.2	0	0	1	0	2	2609.35	8156.96	3137680	155	178
Mudpit_Aged_L3_4Left_IAF	cDNA, FLJ96923, highly similar to Homo sapiens ribophorin II (RPN2), mRNA OS=Homo sapiens PE=2 SV=1	B2RE46,P04844	RPN2	69284.8	2	2	3	YHVPVVVVPEGSASDTHEQAILR	R	L	0.992	53.6	25.3	16.3	53.6	0	0	0	2	2	2503.29	5245.98	18400000	267	289
Mudpit_Aged_L3_4Left_IAF	Complement C3 OS=Homo sapiens GN=C3 PE=1 SV=2	P01024,V9HWA9	C3,HEL-S-62p	187149	63	124	404	AAVYHHFISDGVR	K	K	0.997	64.8	27	17.1	64.8	0	1	6	4	2	1471.74	1747.8	141000000	914	926
Mudpit_Aged_L3_4Left_IAF	Complement C3 OS=Homo sapiens GN=C3 PE=1 SV=2	P01024,V9HWA9	C3,HEL-S-62p	187149	63	124	404	ACEPGVDYVYK	K	T	0.997	34.3	25	15.1	34.3	0	1	0	0	2	1301.57	4313.33	5987360	1536	1546
Mudpit_Aged_L3_4Left_IAF	Complement C3 OS=Homo sapiens GN=C3 PE=1 SV=2	P01024,V9HWA9	C3,HEL-S-62p	187149	63	124	404	AGDFLEANYMNLQR	K	S	0.997	71.8	25	17.5	71.8	0	5	2	0	2	1641.77	6702.76	69700000	1172	1185
Mudpit_Aged_L3_4Left_IAF	Complement C3 OS=Homo sapiens GN=C3 PE=1 SV=2	P01024,V9HWA9	C3,HEL-S-62p	187149	63	124	404	APSTWLTAYVVK	R	V	0.997	92	26.5	18.8	92	0	1	1	0	2	1335.73	6799.29	41200000	1073	1084
Mudpit_Aged_L3_4Left_IAF	Complement C3 OS=Homo sapiens GN=C3 PE=1 SV=2	P01024,V9HWA9	C3,HEL-S-62p	187149	63	124	404	AYYENSPQQVFSTEFEVK	R	E	0.997	104	25	20	103	0	4	1	0	2	2166	7072.54	25400000	208	225
Mudpit_Aged_L3_4Left_IAF	Complement C3 OS=Homo sapiens GN=C3 PE=1 SV=2	P01024,V9HWA9	C3,HEL-S-62p	187149	63	124	404	DAPDHQELNLDVSLQLPSR	K	S	0.996	53.7	26.6	16.4	53.7	0	0	1	0	2	2147.07	6995.04	8318730	1285	1303
Mudpit_Aged_L3_4Left_IAF	Complement C3 OS=Homo sapiens GN=C3 PE=1 SV=2	P01024,V9HWA9	C3,HEL-S-62p	187149	63	124	404	DFDFVPPVVR	K	W	0.993	33.8	27.2	15.1	33.8	0	5	0	0	2	1190.62	7840.12	54700000	1245	1254
Mudpit_Aged_L3_4Left_IAF	Complement C3 OS=Homo sapiens GN=C3 PE=1 SV=2	P01024,V9HWA9	C3,HEL-S-62p	187149	63	124	404	DICEEQVNSLPGSITK	K	A	0.997	66.4	28.1	17.2	66.4	0	2	0	0	2	1790.85	5715.45	27400000	1156	1171
Mudpit_Aged_L3_4Left_IAF	Complement C3 OS=Homo sapiens GN=C3 PE=1 SV=2	P01024,V9HWA9	C3,HEL-S-62p	187149	63	124	404	DMALTAFVLISLQEAK	K	D	0.997	77.1	25.5	17.8	77.1	0	1	0	0	2	1765.94	9136.9	4164410	1140	1155
Mudpit_Aged_L3_4Left_IAF	Complement C3 OS=Homo sapiens GN=C3 PE=1 SV=2	P01024,V9HWA9	C3,HEL-S-62p	187149	63	124	404	DSITTWEILAVSMSDK	K	K	0.997	135	25.9	21.4	135	0	8	4	0	2	1795.88	9110.17	168000000	797	812
Mudpit_Aged_L3_4Left_IAF	Complement C3 OS=Homo sapiens GN=C3 PE=1 SV=2	P01024,V9HWA9	C3,HEL-S-62p	187149	63	124	404	DSITTWEILAVSMSDKK	K	G	0.997	82.6	27.3	18.2	82.6	0	1	2	0	2	1923.97	8526.03	12700000	797	813
Mudpit_Aged_L3_4Left_IAF	Complement C3 OS=Homo sapiens GN=C3 PE=1 SV=2	P01024,V9HWA9	C3,HEL-S-62p	187149	63	124	404	DTWVEHWPEEDECQDEENQK	K	Q	0.994	47.8	25	16	47.8	0	1	0	0	2	2604.01	5437.96	8667630	1625	1644
Mudpit_Aged_L3_4Left_IAF	Complement C3 OS=Homo sapiens GN=C3 PE=1 SV=2	P01024,V9HWA9	C3,HEL-S-62p	187149	63	124	404	DYAGVFSDAGLTFTSSSGQQTAQR	K	A	0.997	162	25	23.1	162	0	7	10	0	2	2494.15	7944	159000000	634	657
Mudpit_Aged_L3_4Left_IAF	Complement C3 OS=Homo sapiens GN=C3 PE=1 SV=2	P01024,V9HWA9	C3,HEL-S-62p	187149	63	124	404	EDIPPADLSDQVPDTESETR	K	I	0.997	104	25	19.5	104	0	28	15	0	2	2214	5555.67	511000000	960	979
Mudpit_Aged_L3_4Left_IAF	Complement C3 OS=Homo sapiens GN=C3 PE=1 SV=2	P01024,V9HWA9	C3,HEL-S-62p	187149	63	124	404	EGVQKEDIPPADLSDQVPDTESETR	R	I	0.997	73.1	25	17.6	73.1	0	0	2	0	2	2755.29	4880.72	2921190	955	979
Mudpit_Aged_L3_4Left_IAF	Complement C3 OS=Homo sapiens GN=C3 PE=1 SV=2	P01024,V9HWA9	C3,HEL-S-62p	187149	63	124	404	ENEGFTVTAEGK	K	G	0.997	56.3	25	16.5	56.3	0	4	0	0	2	1281.6	2423.99	21300000	1326	1337
Mudpit_Aged_L3_4Left_IAF	Complement C3 OS=Homo sapiens GN=C3 PE=1 SV=2	P01024,V9HWA9	C3,HEL-S-62p	187149	63	124	404	EPGQDLVVLPLSITTDFIPSFR	R	L	0.997	71.7	25	17.5	71.7	0	1	1	0	2	2444.31	9296.81	87500000	509	530
Mudpit_Aged_L3_4Left_IAF	Complement C3 OS=Homo sapiens GN=C3 PE=1 SV=2	P01024,V9HWA9	C3,HEL-S-62p	187149	63	124	404	EVVADSVWVDVK	R	D	0.997	73.8	27.8	17.6	73.8	0	4	2	0	2	1345.7	5996.55	202000000	545	556
Mudpit_Aged_L3_4Left_IAF	Complement C3 OS=Homo sapiens GN=C3 PE=1 SV=2	P01024,V9HWA9	C3,HEL-S-62p	187149	63	124	404	EYVLPSFEVIVEPTEK	K	F	0.997	72.1	26.5	17.5	72.1	0	3	3	0	2	1878.97	8612.41	47900000	226	241
Mudpit_Aged_L3_4Left_IAF	Complement C3 OS=Homo sapiens GN=C3 PE=1 SV=2	P01024,V9HWA9	C3,HEL-S-62p	187149	63	124	404	FISLGEACK	R	K	0.994	31.5	25.2	15	31.5	0	1	0	0	2	1025.5	4273.22	6144070	713	721
Mudpit_Aged_L3_4Left_IAF	Complement C3 OS=Homo sapiens GN=C3 PE=1 SV=2	P01024,V9HWA9	C3,HEL-S-62p	187149	63	124	404	FVTVQATFGTQVVEK	K	V	0.997	85.7	25	18.4	85.7	0	9	2	0	2	1653.88	5943.35	60800000	105	119
Mudpit_Aged_L3_4Left_IAF	Complement C3 OS=Homo sapiens GN=C3 PE=1 SV=2	P01024,V9HWA9	C3,HEL-S-62p	187149	63	124	404	GDQDATMSILDISMMTGFAPDTDDLK	R	Q	0.997	91.6	25	18.7	11.9	0	0	1	0	2	2804.23	9133.47	5293870	1394	1419
Mudpit_Aged_L3_4Left_IAF	Complement C3 OS=Homo sapiens GN=C3 PE=1 SV=2	P01024,V9HWA9	C3,HEL-S-62p	187149	63	124	404	GLEVTITAR	K	F	0.997	48.1	28	24	40.1	0	5	0	0	2	959.552	3557.12	96400000	250	258
Mudpit_Aged_L3_4Left_IAF	Complement C3 OS=Homo sapiens GN=C3 PE=1 SV=2	P01024,V9HWA9	C3,HEL-S-62p	187149	63	124	404	GQGTLSVVTMYHAK	K	A	0.997	80.1	26.4	18	80.1	0	4	6	0	2	1507.76	2534.32	69700000	1338	1351
Mudpit_Aged_L3_4Left_IAF	Complement C3 OS=Homo sapiens GN=C3 PE=1 SV=2	P01024,V9HWA9	C3,HEL-S-62p	187149	63	124	404	GYTQQLAFR	K	Q	0.997	46.8	26.5	20.5	42.2	0	3	0	0	2	1083.56	3543.18	48800000	1052	1060
Mudpit_Aged_L3_4Left_IAF	Complement C3 OS=Homo sapiens GN=C3 PE=1 SV=2	P01024,V9HWA9	C3,HEL-S-62p	187149	63	124	404	HLIVTPSGCGEQNMIGMTPTVIAVHYLDETEQWEK	K	F	0.997	65.3	25	17.1	65.3	0	0	2	11	2	4016.87	8660.88	144000000	1002	1036
Mudpit_Aged_L3_4Left_IAF	Complement C3 OS=Homo sapiens GN=C3 PE=1 SV=2	P01024,V9HWA9	C3,HEL-S-62p	187149	63	124	404	HQQTVTIPPK	R	S	0.997	48.3	26.6	16	48.3	0	2	1	0	2	1148.64	1196.73	16800000	882	891
Mudpit_Aged_L3_4Left_IAF	Complement C3 OS=Homo sapiens GN=C3 PE=1 SV=2	P01024,V9HWA9	C3,HEL-S-62p	187149	63	124	404	IHWESASLLR	R	S	0.997	61.4	25.2	30.2	48.1	0	0	2	0	2	1211.65	4433.74	18000000	1311	1320
Mudpit_Aged_L3_4Left_IAF	Complement C3 OS=Homo sapiens GN=C3 PE=1 SV=2	P01024,V9HWA9	C3,HEL-S-62p	187149	63	124	404	ILLQGTPVAQMTEDAVDAER	R	L	0.997	142	26.7	21.9	142	0	10	14	0	2	2157.09	7358.65	131000000	980	999
Mudpit_Aged_L3_4Left_IAF	Complement C3 OS=Homo sapiens GN=C3 PE=1 SV=2	P01024,V9HWA9	C3,HEL-S-62p	187149	63	124	404	IPIEDGSGEVVLSR	R	K	0.997	90.1	26.8	18.6	90.1	0	6	1	0	2	1470.78	5096.81	96900000	291	304
Mudpit_Aged_L3_4Left_IAF	Complement C3 OS=Homo sapiens GN=C3 PE=1 SV=2	P01024,V9HWA9	C3,HEL-S-62p	187149	63	124	404	ISLPESLK	R	R	0.99	46.2	27.1	29.3	32.8	0	4	0	0	2	886.524	4234.87	98400000	282	289
Mudpit_Aged_L3_4Left_IAF	Complement C3 OS=Homo sapiens GN=C3 PE=1 SV=2	P01024,V9HWA9	C3,HEL-S-62p	187149	63	124	404	LESEETMVLEAHDAQGDVPVTVTVHDFPGK	R	K	0.997	60.1	25.1	16.8	60.1	0	0	4	3	2	3250.56	6652.88	56300000	36	65
Mudpit_Aged_L3_4Left_IAF	Complement C3 OS=Homo sapiens GN=C3 PE=1 SV=2	P01024,V9HWA9	C3,HEL-S-62p	187149	63	124	404	LESEETMVLEAHDAQGDVPVTVTVHDFPGKK	R	L	0.968	34.8	26	15.2	34.8	0	0	0	1	2	3394.65	5395.77	3139670	36	66
Mudpit_Aged_L3_4Left_IAF	Complement C3 OS=Homo sapiens GN=C3 PE=1 SV=2	P01024,V9HWA9	C3,HEL-S-62p	187149	63	124	404	NTLIIYLDK	R	V	0.997	39.1	25	15.4	39.1	0	3	0	0	2	1092.63	5782.05	25400000	1442	1450
Mudpit_Aged_L3_4Left_IAF	Complement C3 OS=Homo sapiens GN=C3 PE=1 SV=2	P01024,V9HWA9	C3,HEL-S-62p	187149	63	124	404	QDSLSSQNQLGVLPLSWDIPELVNMGQWK	K	I	0.997	64.2	25.6	17	64.2	0	0	2	0	2	3298.64	9236.72	25000000	177	205
Mudpit_Aged_L3_4Left_IAF	Complement C3 OS=Homo sapiens GN=C3 PE=1 SV=2	P01024,V9HWA9	C3,HEL-S-62p	187149	63	124	404	QGALELIK	R	K	0.99	62	27.5	63.9	14.9	0	3	0	0	2	871.525	3670.22	146000000	1043	1050
Mudpit_Aged_L3_4Left_IAF	Complement C3 OS=Homo sapiens GN=C3 PE=1 SV=2	P01024,V9HWA9	C3,HEL-S-62p	187149	63	124	404	QKPDGVFQEDAPVIHQEMIGGLR	K	N	0.946	33.9	26.8	15.1	33.9	0	0	0	1	2	2564.29	5817.4	8590260	1112	1134
Mudpit_Aged_L3_4Left_IAF	Complement C3 OS=Homo sapiens GN=C3 PE=1 SV=2	P01024,V9HWA9	C3,HEL-S-62p	187149	63	124	404	QPSSAFAAFVK	R	R	0.997	68.4	26.7	18.4	67.3	0	2	0	0	2	1152.6	5127.22	39500000	1061	1071
Mudpit_Aged_L3_4Left_IAF	Complement C3 OS=Homo sapiens GN=C3 PE=1 SV=2	P01024,V9HWA9	C3,HEL-S-62p	187149	63	124	404	QPVPGQQMTLK	R	I	0.997	62.2	25	16.9	62.2	0	3	0	0	2	1242.65	2431.87	50400000	574	584
Mudpit_Aged_L3_4Left_IAF	Complement C3 OS=Homo sapiens GN=C3 PE=1 SV=2	P01024,V9HWA9	C3,HEL-S-62p	187149	63	124	404	RIPIEDGSGEVVLSR	K	K	0.997	84.3	26.2	18.3	84.3	0	3	3	0	2	1626.88	4316.71	42200000	290	304
Mudpit_Aged_L3_4Left_IAF	Complement C3 OS=Homo sapiens GN=C3 PE=1 SV=2	P01024,V9HWA9	C3,HEL-S-62p	187149	63	124	404	SEETKENEGFTVTAEGK	R	G	0.997	112	25	20	112	0	2	3	0	2	1855.86	1649.24	50200000	1321	1337
Mudpit_Aged_L3_4Left_IAF	Complement C3 OS=Homo sapiens GN=C3 PE=1 SV=2	P01024,V9HWA9	C3,HEL-S-62p	187149	63	124	404	SEFPESWLWNVEDLK	R	E	0.997	83.9	25.9	18.2	83.9	0	2	1	0	2	1878.89	9028.6	26600000	765	779
Mudpit_Aged_L3_4Left_IAF	Complement C3 OS=Homo sapiens GN=C3 PE=1 SV=2	P01024,V9HWA9	C3,HEL-S-62p	187149	63	124	404	SEFPESWLWNVEDLKEPPK	R	N	0.997	74.3	25.8	17.6	74.3	0	5	7	0	2	2330.13	8397.91	410000000	765	783
Mudpit_Aged_L3_4Left_IAF	Complement C3 OS=Homo sapiens GN=C3 PE=1 SV=2	P01024,V9HWA9	C3,HEL-S-62p	187149	63	124	404	SGIPIVTSPYQIHFTK	R	T	0.997	62.8	26.1	16.9	62.8	0	1	1	0	2	1787.97	6359.23	14200000	344	359
Mudpit_Aged_L3_4Left_IAF	Complement C3 OS=Homo sapiens GN=C3 PE=1 SV=2	P01024,V9HWA9	C3,HEL-S-62p	187149	63	124	404	SGQSEDRQPVPGQQMTLK	K	I	0.997	67.8	29.8	17.2	67.8	0	4	0	0	2	1985.97	1590.38	12500000	567	584
Mudpit_Aged_L3_4Left_IAF	Complement C3 OS=Homo sapiens GN=C3 PE=1 SV=2	P01024,V9HWA9	C3,HEL-S-62p	187149	63	124	404	SLYVSATVILHSGSDMVQAER	K	S	0.997	76.4	25.9	17.8	76.4	0	1	3	0	2	2263.14	7015.65	19400000	323	343
Mudpit_Aged_L3_4Left_IAF	Complement C3 OS=Homo sapiens GN=C3 PE=1 SV=2	P01024,V9HWA9	C3,HEL-S-62p	187149	63	124	404	SNLDEDIIAEENIVSR	R	S	0.997	119	27	20.5	119	0	13	5	0	2	1816.89	6929.28	167000000	749	764
Mudpit_Aged_L3_4Left_IAF	Complement C3 OS=Homo sapiens GN=C3 PE=1 SV=2	P01024,V9HWA9	C3,HEL-S-62p	187149	63	124	404	SSLSVPYVIVPLK	K	T	0.997	56.8	25	16.5	56.8	0	2	1	0	2	1401.84	7633.06	85800000	892	904
Mudpit_Aged_L3_4Left_IAF	Complement C3 OS=Homo sapiens GN=C3 PE=1 SV=2	P01024,V9HWA9	C3,HEL-S-62p	187149	63	124	404	SYTVAIAGYALAQMGR	R	L	0.997	77.2	32	17.8	77.2	0	2	0	0	2	1687.85	6416.93	15900000	1186	1201
Mudpit_Aged_L3_4Left_IAF	Complement C3 OS=Homo sapiens GN=C3 PE=1 SV=2	P01024,V9HWA9	C3,HEL-S-62p	187149	63	124	404	TELRPGETLNVNFLLR	R	M	0.997	72.3	25.1	17.5	72.3	0	2	2	0	2	1872.03	6957.84	123000000	463	478
Mudpit_Aged_L3_4Left_IAF	Complement C3 OS=Homo sapiens GN=C3 PE=1 SV=2	P01024,V9HWA9	C3,HEL-S-62p	187149	63	124	404	TGLQEVEVK	K	A	0.997	72.6	27.7	24.6	65.6	0	3	0	0	2	1002.55	2087.09	57700000	905	913
Mudpit_Aged_L3_4Left_IAF	Complement C3 OS=Homo sapiens GN=C3 PE=1 SV=2	P01024,V9HWA9	C3,HEL-S-62p	187149	63	124	404	TIYTPGSTVLYR	K	I	0.997	48.3	27	16	48.3	0	4	0	0	2	1370.73	5023.62	85000000	137	148
Mudpit_Aged_L3_4Left_IAF	Complement C3 OS=Homo sapiens GN=C3 PE=1 SV=2	P01024,V9HWA9	C3,HEL-S-62p	187149	63	124	404	TMQALPYSTVGNSNNYLHLSVLR	R	T	0.997	86.7	27.2	18.4	86.7	0	2	3	0	2	2594.3	6830.39	37800000	440	462
Mudpit_Aged_L3_4Left_IAF	Complement C3 OS=Homo sapiens GN=C3 PE=1 SV=2	P01024,V9HWA9	C3,HEL-S-62p	187149	63	124	404	TVMVNIENPEGIPVK	R	Q	0.997	65.5	27.1	17.1	65.5	0	10	5	0	2	1655.87	5980.92	199000000	162	176
Mudpit_Aged_L3_4Left_IAF	Complement C3 OS=Homo sapiens GN=C3 PE=1 SV=2	P01024,V9HWA9	C3,HEL-S-62p	187149	63	124	404	VEGTAFVIFGIQDGEQR	K	I	0.997	106	27.9	19.6	106	0	13	6	0	2	1865.94	8093.22	329000000	265	281
Mudpit_Aged_L3_4Left_IAF	Complement C3 OS=Homo sapiens GN=C3 PE=1 SV=2	P01024,V9HWA9	C3,HEL-S-62p	187149	63	124	404	VELLHNPAFCSLATTK	R	R	0.979	37.2	26.9	15.3	37.2	0	0	1	0	2	1801.92	6180.68	3887260	864	879
Mudpit_Aged_L3_4Left_IAF	Complement C3 OS=Homo sapiens GN=C3 PE=1 SV=2	P01024,V9HWA9	C3,HEL-S-62p	187149	63	124	404	VHQYFNVELIQPGAVK	K	V	0.997	72.8	26.1	17.5	72.8	0	2	2	1	2	1841.99	5930.83	101000000	1463	1478
Mudpit_Aged_L3_4Left_IAF	Complement C3 OS=Homo sapiens GN=C3 PE=1 SV=2	P01024,V9HWA9	C3,HEL-S-62p	187149	63	124	404	VLLDGVQNPR	K	A	0.997	59.9	25	18.4	58.2	0	6	0	0	2	1110.63	3076.52	54700000	306	315
Mudpit_Aged_L3_4Left_IAF	Complement C3 OS=Homo sapiens GN=C3 PE=1 SV=2	P01024,V9HWA9	C3,HEL-S-62p	187149	63	124	404	VPVAVQGEDTVQSLTQGDGVAK	R	L	0.997	123	26.8	20.7	123	0	11	5	0	2	2198.13	5871.18	181000000	387	408
Mudpit_Aged_L3_4Left_IAF	Complement C3 OS=Homo sapiens GN=C3 PE=1 SV=2	P01024,V9HWA9	C3,HEL-S-62p	187149	63	124	404	VQLSNDFDEYIMAIEQTIK	K	S	0.997	115	26.4	20.2	115	0	5	4	0	2	2273.1	9168.92	326000000	1552	1570
Mudpit_Aged_L3_4Left_IAF	Complement C3 OS=Homo sapiens GN=C3 PE=1 SV=2	P01024,V9HWA9	C3,HEL-S-62p	187149	63	124	404	VVLVAVDK	R	G	0.99	60.5	25	16.8	60.5	0	5	0	0	2	842.535	2734.24	219000000	593	600
Mudpit_Aged_L3_4Left_IAF	Complement C3 OS=Homo sapiens GN=C3 PE=1 SV=2	P01024,V9HWA9	C3,HEL-S-62p	187149	63	124	404	YRGDQDATMSILDISMMTGFAPDTDDLK	R	Q	0.997	114	25	20.1	12.3	0	0	11	0	2	3139.39	8719.98	59600000	1392	1419
Mudpit_Aged_L3_4Left_IAF	Complement C3 OS=Homo sapiens GN=C3 PE=1 SV=2	P01024,V9HWA9	C3,HEL-S-62p	187149	63	124	404	YYTYLIMNK	R	G	0.997	39.8	25	15.5	39.8	0	5	0	0	2	1208.6	5388.4	126000000	489	497
Mudpit_Aged_L3_4Left_IAF	cDNA, FLJ78893, highly similar to Destrin OS=Homo sapiens PE=2 SV=1	B7Z9M9,F6RFD5,P60981,V9HWA6	DSTN,HEL32	18506.2	2	2	3	EILVGDVGVTITDPFK	K	H	0.997	90.3	26.9	18.6	90.3	0	1	0	0	2	1702.93	8842.95	8650080	54	69
Mudpit_Aged_L3_4Left_IAF	cDNA, FLJ78893, highly similar to Destrin OS=Homo sapiens PE=2 SV=1	B7Z9M9,F6RFD5,P60981,V9HWA6	DSTN,HEL32	18506.2	2	2	3	YALYDASFETK	R	E	0.997	48.9	25.2	16.1	48.9	0	2	0	0	2	1307.62	5222.96	10700000	82	92
Mudpit_Aged_L3_4Left_IAF	ASPN protein OS=Homo sapiens GN=ASPN PE=2 SV=1	Q6P528,Q9BXN1	ASPN	43419.8	11	16	24	GLPPTLLELHLDYNK	K	I	0.997	56.2	25	16.5	56.2	0	0	1	0	2	1722.94	7104.53	5170840	238	252
Mudpit_Aged_L3_4Left_IAF	ASPN protein OS=Homo sapiens GN=ASPN PE=2 SV=1	Q6P528,Q9BXN1	ASPN	43419.8	11	16	24	GLTSLYGLILNNNK	K	L	0.997	81.2	25.6	18.1	81.2	0	1	1	0	2	1519.85	7969.18	22800000	124	137
Mudpit_Aged_L3_4Left_IAF	ASPN protein OS=Homo sapiens GN=ASPN PE=2 SV=1	Q6P528,Q9BXN1	ASPN	43419.8	11	16	24	IPSGLPELK	K	Y	0.997	40.9	25	37.8	18.7	0	2	0	0	2	953.567	4605.5	75600000	304	312
Mudpit_Aged_L3_4Left_IAF	ASPN protein OS=Homo sapiens GN=ASPN PE=2 SV=1	Q6P528,Q9BXN1	ASPN	43419.8	11	16	24	ISTVELEDFK	K	R	0.997	58	26.8	16.6	58	0	1	0	0	2	1180.61	5201.75	4773820	253	262
Mudpit_Aged_L3_4Left_IAF	ASPN protein OS=Homo sapiens GN=ASPN PE=2 SV=1	Q6P528,Q9BXN1	ASPN	43419.8	11	16	24	ISTVELEDFKR	K	Y	0.997	51.4	25.6	17.3	50.3	0	1	3	0	2	1336.71	3987.38	75900000	253	263
Mudpit_Aged_L3_4Left_IAF	ASPN protein OS=Homo sapiens GN=ASPN PE=2 SV=1	Q6P528,Q9BXN1	ASPN	43419.8	11	16	24	KIPSGLPELK	K	Y	0.958	26.3	25	16.3	24.6	0	1	0	0	2	1081.66	3188.21	6067010	303	312
Mudpit_Aged_L3_4Left_IAF	ASPN protein OS=Homo sapiens GN=ASPN PE=2 SV=1	Q6P528,Q9BXN1	ASPN	43419.8	11	16	24	LYLSHNQLSEIPLNLPK	R	S	0.997	78.2	25	17.9	78.2	0	1	1	0	2	1979.1	6700.83	17900000	155	171
Mudpit_Aged_L3_4Left_IAF	ASPN protein OS=Homo sapiens GN=ASPN PE=2 SV=1	Q6P528,Q9BXN1	ASPN	43419.8	11	16	24	MSVQLGNFGM	R	-	0.98	26.7	25	14.7	26.7	0	1	0	0	2	1083.5	8157.26	1482680	371	380
Mudpit_Aged_L3_4Left_IAF	ASPN protein OS=Homo sapiens GN=ASPN PE=2 SV=1	Q6P528,Q9BXN1	ASPN	43419.8	11	16	24	SLYSAISLFNNPVK	K	Y	0.997	63.5	25.9	17	63.5	0	2	1	0	2	1552.84	7880.12	22400000	342	355
Mudpit_Aged_L3_4Left_IAF	ASPN protein OS=Homo sapiens GN=ASPN PE=2 SV=1	Q6P528,Q9BXN1	ASPN	43419.8	11	16	24	VGVNDFCPTVPK	R	M	0.995	33.3	25	15.1	33.3	0	4	0	0	2	1333.65	5002.14	56800000	327	338
Mudpit_Aged_L3_4Left_IAF	ASPN protein OS=Homo sapiens GN=ASPN PE=2 SV=1	Q6P528,Q9BXN1	ASPN	43419.8	11	16	24	YWEMQPATFR	K	C	0.997	45.4	25	15.8	45.4	0	3	0	0	2	1344.6	4194.18	31800000	356	365
Mudpit_Aged_L3_4Left_IAF	Alpha-1,4 glucan phosphorylase OS=Homo sapiens GN=PYGM PE=3 SV=1	A0A0M4FEM1,B2RB32,B4DRW6,P11217	PYGM	97094.8	3	3	3	IGEDFISDLDQLR	R	K	0.997	66.1	27	17.1	66.1	0	1	0	0	2	1520.76	8594.1	2913600	508	520
Mudpit_Aged_L3_4Left_IAF	Alpha-1,4 glucan phosphorylase OS=Homo sapiens GN=PYGM PE=3 SV=1	A0A0M4FEM1,B2RB32,B4DRW6,P11217	PYGM	97094.8	3	3	3	LLSFVDDEAFIR	K	D	0.997	42.7	26	15.7	42.7	0	1	0	0	2	1424.74	7976.15	2828730	522	533
Mudpit_Aged_L3_4Left_IAF	Alpha-1,4 glucan phosphorylase OS=Homo sapiens GN=PYGM PE=3 SV=1	A0A0M4FEM1,B2RB32,B4DRW6,P11217	PYGM	97094.8	3	3	3	WPVHLLETLLPR	R	H	0.997	52.7	25	16.3	52.7	0	0	1	0	2	1473.86	8271.55	1721310	388	399
Mudpit_Aged_L3_4Left_IAF	Out at first protein homolog OS=Homo sapiens GN=OAF PE=2 SV=1	Q86UD1	OAF	30688.4	4	5	8	ALILGELEK	R	G	0.997	51.7	25	24.3	43.7	0	2	0	0	2	985.593	5317.74	16500000	84	92
Mudpit_Aged_L3_4Left_IAF	Out at first protein homolog OS=Homo sapiens GN=OAF PE=2 SV=1	Q86UD1	OAF	30688.4	4	5	8	FWLEQGVDSSVFEALPK	R	A	0.997	81.9	26.9	18.1	81.9	0	2	0	0	2	1951.98	9015.21	18100000	178	194
Mudpit_Aged_L3_4Left_IAF	Out at first protein homolog OS=Homo sapiens GN=OAF PE=2 SV=1	Q86UD1	OAF	30688.4	4	5	8	LPDGQVTEESLQADSDADSISLELR	R	K	0.997	80.5	25.4	18	80.5	0	2	1	0	2	2688.29	7861.39	2715590	38	62
Mudpit_Aged_L3_4Left_IAF	Out at first protein homolog OS=Homo sapiens GN=OAF PE=2 SV=1	Q86UD1	OAF	30688.4	4	5	8	SYSFDFYVPQR	K	Q	0.997	61.1	25.1	16.8	61.1	0	1	0	0	2	1408.65	6745.49	19500000	251	261
Mudpit_Aged_L3_4Left_IAF	Cartilage intermediate layer protein 2 OS=Homo sapiens GN=CILP2 PE=1 SV=1	K7EPJ4	CILP2	126857	25	43	159	ADAGTAVTFQCR	K	E	0.997	61.4	25	16.8	61.4	0	1	0	0	2	1297.58	2813.22	7276230	1100	1111
Mudpit_Aged_L3_4Left_IAF	Cartilage intermediate layer protein 2 OS=Homo sapiens GN=CILP2 PE=1 SV=1	K7EPJ4	CILP2	126857	25	43	159	APGSAEQLQVGPVAVR	R	V	0.997	96.9	27.2	19.1	96.9	0	2	1	0	2	1578.86	4791.76	82700000	655	670
Mudpit_Aged_L3_4Left_IAF	Cartilage intermediate layer protein 2 OS=Homo sapiens GN=CILP2 PE=1 SV=1	K7EPJ4	CILP2	126857	25	43	159	CFDGSSDGFSR	R	E	0.97	26	25	14.6	26	0	1	0	0	2	1235.46	3437.28	2666300	1086	1096
Mudpit_Aged_L3_4Left_IAF	Cartilage intermediate layer protein 2 OS=Homo sapiens GN=CILP2 PE=1 SV=1	K7EPJ4	CILP2	126857	25	43	159	DLTSAASAPSDLR	R	F	0.997	63.6	25.4	17	63.6	0	9	0	0	2	1303.65	4744.6	67300000	620	632
Mudpit_Aged_L3_4Left_IAF	Cartilage intermediate layer protein 2 OS=Homo sapiens GN=CILP2 PE=1 SV=1	K7EPJ4	CILP2	126857	25	43	159	DQPGTVATSDAHGTFR	R	V	0.997	84.8	25	18.3	84.8	0	5	9	0	2	1659.77	1907.51	192000000	238	253
Mudpit_Aged_L3_4Left_IAF	Cartilage intermediate layer protein 2 OS=Homo sapiens GN=CILP2 PE=1 SV=1	K7EPJ4	CILP2	126857	25	43	159	ECQGAPVTASHFR	R	F	0.997	59.6	25	16.7	59.6	0	0	1	0	2	1460.66	1513.3	7549490	892	904
Mudpit_Aged_L3_4Left_IAF	Cartilage intermediate layer protein 2 OS=Homo sapiens GN=CILP2 PE=1 SV=1	K7EPJ4	CILP2	126857	25	43	159	EGTPASWTGDLLAWWPNPQEFR	R	A	0.997	91.2	26.5	18.7	91.2	0	3	2	0	2	2558.21	9230.31	29800000	922	943
Mudpit_Aged_L3_4Left_IAF	Cartilage intermediate layer protein 2 OS=Homo sapiens GN=CILP2 PE=1 SV=1	K7EPJ4	CILP2	126857	25	43	159	FTPSEQVEGVVVTLVNLEPAPGFSANPR	K	A	0.997	79.9	26	18	79.9	0	1	3	1	2	2954.53	9136.26	97300000	755	782
Mudpit_Aged_L3_4Left_IAF	Cartilage intermediate layer protein 2 OS=Homo sapiens GN=CILP2 PE=1 SV=1	K7EPJ4	CILP2	126857	25	43	159	FVDSDGELAPLR	R	T	0.997	89.3	27.6	18.6	89.3	0	20	0	0	2	1318.66	5298.61	226000000	633	644
Mudpit_Aged_L3_4Left_IAF	Cartilage intermediate layer protein 2 OS=Homo sapiens GN=CILP2 PE=1 SV=1	K7EPJ4	CILP2	126857	25	43	159	HPPPVPAEDPAAFSMLAPLDPLGHNYGVYTVTDQSPR	R	L	0.997	75	26	17.7	75	0	0	3	6	2	3972.92	8280	155000000	1040	1076
Mudpit_Aged_L3_4Left_IAF	Cartilage intermediate layer protein 2 OS=Homo sapiens GN=CILP2 PE=1 SV=1	K7EPJ4	CILP2	126857	25	43	159	ILLGQEPIGFTAYQGDFTIEVPPSTQR	R	L	0.997	79.1	25	17.9	79.1	0	2	3	0	2	2977.53	8985.81	73300000	499	525
Mudpit_Aged_L3_4Left_IAF	Cartilage intermediate layer protein 2 OS=Homo sapiens GN=CILP2 PE=1 SV=1	K7EPJ4	CILP2	126857	25	43	159	IQGPQEYMVR	K	S	0.997	63.5	27	24.5	56	0	8	0	0	2	1220.61	2872.29	720000000	951	960
Mudpit_Aged_L3_4Left_IAF	Cartilage intermediate layer protein 2 OS=Homo sapiens GN=CILP2 PE=1 SV=1	K7EPJ4	CILP2	126857	25	43	159	LEKPYLVK	K	H	0.99	35	25	20.4	29.8	0	1	0	0	2	989.603	1555.02	3553710	295	302
Mudpit_Aged_L3_4Left_IAF	Cartilage intermediate layer protein 2 OS=Homo sapiens GN=CILP2 PE=1 SV=1	K7EPJ4	CILP2	126857	25	43	159	LFNLDVPER	R	R	0.997	44.9	28.6	21.7	39	0	1	0	0	2	1102.59	5818.8	5286410	732	740
Mudpit_Aged_L3_4Left_IAF	Cartilage intermediate layer protein 2 OS=Homo sapiens GN=CILP2 PE=1 SV=1	K7EPJ4	CILP2	126857	25	43	159	LLESPATALGDIR	R	R	0.997	98.6	26	20.6	97.2	0	16	1	0	2	1355.75	6181.54	789000000	1124	1136
Mudpit_Aged_L3_4Left_IAF	Cartilage intermediate layer protein 2 OS=Homo sapiens GN=CILP2 PE=1 SV=1	K7EPJ4	CILP2	126857	25	43	159	LVVTFVDPSGEFMDAVR	R	V	0.997	113	26.3	20.1	113	0	14	6	0	2	1881.94	8352.22	432000000	526	542
Mudpit_Aged_L3_4Left_IAF	Cartilage intermediate layer protein 2 OS=Homo sapiens GN=CILP2 PE=1 SV=1	K7EPJ4	CILP2	126857	25	43	159	LWSLNPETGLWEEESGFR	K	R	0.997	109	25.1	19.8	109	0	2	2	0	2	2150.02	8856	97500000	687	704
Mudpit_Aged_L3_4Left_IAF	Cartilage intermediate layer protein 2 OS=Homo sapiens GN=CILP2 PE=1 SV=1	K7EPJ4	CILP2	126857	25	43	159	SVYTGQPSPALEDWEAR	R	A	0.997	78.1	25.1	17.9	78.1	0	2	0	0	2	1905.9	5924.36	4410470	40	56
Mudpit_Aged_L3_4Left_IAF	Cartilage intermediate layer protein 2 OS=Homo sapiens GN=CILP2 PE=1 SV=1	K7EPJ4	CILP2	126857	25	43	159	TTDWALPSAVGER	R	V	0.997	44.3	26.2	15.8	44.3	0	6	1	0	2	1402.7	5632.61	272000000	106	118
Mudpit_Aged_L3_4Left_IAF	Cartilage intermediate layer protein 2 OS=Homo sapiens GN=CILP2 PE=1 SV=1	K7EPJ4	CILP2	126857	25	43	159	TYGMFSVDLR	R	A	0.997	43.2	25.7	15.7	43.2	0	3	0	0	2	1188.57	6459.47	34700000	645	654
Mudpit_Aged_L3_4Left_IAF	Cartilage intermediate layer protein 2 OS=Homo sapiens GN=CILP2 PE=1 SV=1	K7EPJ4	CILP2	126857	25	43	159	VAVNGLLR	R	D	0.99	56.9	25	23.1	50.3	0	3	0	0	2	841.525	3234.43	21000000	1027	1034
Mudpit_Aged_L3_4Left_IAF	Cartilage intermediate layer protein 2 OS=Homo sapiens GN=CILP2 PE=1 SV=1	K7EPJ4	CILP2	126857	25	43	159	VEADKYEYNVVPFR	R	E	0.997	89.9	26.1	18.6	89.9	0	1	3	0	2	1728.86	5133.11	57200000	908	921
Mudpit_Aged_L3_4Left_IAF	Cartilage intermediate layer protein 2 OS=Homo sapiens GN=CILP2 PE=1 SV=1	K7EPJ4	CILP2	126857	25	43	159	VFLVGNVEIR	R	E	0.997	59.5	25.8	16.7	59.5	0	3	0	0	2	1145.67	6271.95	102000000	719	728
Mudpit_Aged_L3_4Left_IAF	Cartilage intermediate layer protein 2 OS=Homo sapiens GN=CILP2 PE=1 SV=1	K7EPJ4	CILP2	126857	25	43	159	VVAADSGEPLR	R	F	0.997	69.7	25	17.4	69.7	0	10	0	0	2	1113.59	1693.32	108000000	485	495
Mudpit_Aged_L3_4Left_IAF	Cartilage intermediate layer protein 2 OS=Homo sapiens GN=CILP2 PE=1 SV=1	K7EPJ4	CILP2	126857	25	43	159	YEYNVVPFR	K	E	0.997	47.4	25.7	16	47.4	0	3	0	0	2	1186.59	5132.38	278000000	913	921
Mudpit_Aged_L3_4Left_IAF	Angiopoietin-related protein 7 OS=Homo sapiens GN=ANGPTL7 PE=1 SV=1	O43827	ANGPTL7	40018.9	2	2	2	SGLVSFYR	K	D	0.979	30.9	25	14.9	30.9	0	1	0	0	2	928.489	4499.28	5265310	179	186
Mudpit_Aged_L3_4Left_IAF	Angiopoietin-related protein 7 OS=Homo sapiens GN=ANGPTL7 PE=1 SV=1	O43827	ANGPTL7	40018.9	2	2	2	VEMEDWEGNLR	R	Y	0.997	57.8	25	16.6	57.8	0	1	0	0	2	1377.61	5433.2	6360240	221	231
Mudpit_Aged_L3_4Left_IAF	Serpin peptidase inhibitor, clade H (Heat shock protein 47), member 1, (Collagen binding protein 1), isoform CRA_a OS=Homo sapiens GN=SERPINH1 PE=3 SV=1	A0A024R5K8,P50454	SERPINH1	46442	5	5	5	AVAISLPK	K	G	0.99	40.9	25	15.6	40.9	0	1	0	0	2	798.508	3597.35	2086610	301	308
Mudpit_Aged_L3_4Left_IAF	Serpin peptidase inhibitor, clade H (Heat shock protein 47), member 1, (Collagen binding protein 1), isoform CRA_a OS=Homo sapiens GN=SERPINH1 PE=3 SV=1	A0A024R5K8,P50454	SERPINH1	46442	5	5	5	DQAVENILVSPVVVASSLGLVSLGGK	K	A	0.997	124	25	20.7	124	0	0	1	0	2	2551.43	9360.15	6826750	61	86
Mudpit_Aged_L3_4Left_IAF	Serpin peptidase inhibitor, clade H (Heat shock protein 47), member 1, (Collagen binding protein 1), isoform CRA_a OS=Homo sapiens GN=SERPINH1 PE=3 SV=1	A0A024R5K8,P50454	SERPINH1	46442	5	5	5	DTQSGSLLFIGR	R	L	0.997	83.4	27.4	22.7	78.9	0	1	0	0	2	1293.68	6593.02	3937710	394	405
Mudpit_Aged_L3_4Left_IAF	Serpin peptidase inhibitor, clade H (Heat shock protein 47), member 1, (Collagen binding protein 1), isoform CRA_a OS=Homo sapiens GN=SERPINH1 PE=3 SV=1	A0A024R5K8,P50454	SERPINH1	46442	5	5	5	LYGPSSVSFADDFVR	R	S	0.997	88.2	26.3	18.5	88.2	0	1	0	0	2	1659.8	7302.87	3353930	134	148
Mudpit_Aged_L3_4Left_IAF	Serpin peptidase inhibitor, clade H (Heat shock protein 47), member 1, (Collagen binding protein 1), isoform CRA_a OS=Homo sapiens GN=SERPINH1 PE=3 SV=1	A0A024R5K8,P50454	SERPINH1	46442	5	5	5	SALQSINEWAAQTTDGK	R	L	0.997	105	27	19.5	105	0	1	0	0	2	1819.88	6306.8	4163690	168	184
Mudpit_Aged_L3_4Left_IAF	cDNA FLJ76271, highly similar to Homo sapiens protein O-fucosyltransferase 2 (POFUT2), transcript variant 3, mRNA OS=Homo sapiens PE=2 SV=1	A8K3W7,Q9Y2G5	POFUT2	49977	2	2	2	FEPTWEELELYK	R	D	0.997	40.3	27.5	15.5	40.3	0	1	0	0	2	1583.76	7731.13	2022980	352	363
Mudpit_Aged_L3_4Left_IAF	cDNA FLJ76271, highly similar to Homo sapiens protein O-fucosyltransferase 2 (POFUT2), transcript variant 3, mRNA OS=Homo sapiens PE=2 SV=1	A8K3W7,Q9Y2G5	POFUT2	49977	2	2	2	VFVATDAVR	K	K	0.997	37.4	26.8	15.3	37.4	0	1	0	0	2	977.541	2776.21	4414710	328	336
Mudpit_Aged_L3_4Left_IAF	Alanyl (Membrane) aminopeptidase (Aminopeptidase N, aminopeptidase M, microsomal aminopeptidase, CD13, p150), isoform CRA_a OS=Homo sapiens GN=ANPEP PE=4 SV=1	A0A024RC61,P15144,Q59E93	ANPEP	109542	3	3	3	AQIINDAFNLASAHK	R	V	0.988	60.9	25.9	16.8	60.9	0	0	1	0	2	1612.84	5473.95	5034580	659	673
Mudpit_Aged_L3_4Left_IAF	Alanyl (Membrane) aminopeptidase (Aminopeptidase N, aminopeptidase M, microsomal aminopeptidase, CD13, p150), isoform CRA_a OS=Homo sapiens GN=ANPEP PE=4 SV=1	A0A024RC61,P15144,Q59E93	ANPEP	109542	3	3	3	MLSSFLSEDVFK	R	Q	0.997	58.3	25.1	16.6	58.3	0	1	0	0	2	1418.69	7424.95	2669140	486	497
Mudpit_Aged_L3_4Left_IAF	Alanyl (Membrane) aminopeptidase (Aminopeptidase N, aminopeptidase M, microsomal aminopeptidase, CD13, p150), isoform CRA_a OS=Homo sapiens GN=ANPEP PE=4 SV=1	A0A024RC61,P15144,Q59E93	ANPEP	109542	3	3	3	VVATTQMQAADAR	K	K	0.997	83.4	28	18.2	83.4	0	1	0	0	2	1361.68	1573	4058560	206	218
Mudpit_Aged_L3_4Left_IAF	Complement C1r subcomponent-like protein OS=Homo sapiens GN=C1RL PE=1 SV=2	Q9NZP8	C1RL	53497.5	2	2	4	GSEAINAPGDNPAK	R	V	0.997	70.4	26.7	17.4	70.4	0	3	0	0	2	1340.64	1376.24	31600000	177	190
Mudpit_Aged_L3_4Left_IAF	Complement C1r subcomponent-like protein OS=Homo sapiens GN=C1RL PE=1 SV=2	Q9NZP8	C1RL	53497.5	2	2	4	VLSYVDWIK	K	G	0.997	47.3	25	16	47.2	0	1	0	0	2	1122.62	6921.7	10700000	472	480
Mudpit_Aged_L3_4Left_IAF	Mannosyl-oligosaccharide 1,2-alpha-mannosidase IA OS=Homo sapiens GN=MAN1A1 PE=1 SV=3	P33908	MAN1A1	72971.7	4	5	11	FDGGVEAIATR	R	Q	0.997	67.2	27.6	20.1	64.2	0	4	0	0	2	1135.57	4137.86	28700000	526	536
Mudpit_Aged_L3_4Left_IAF	Mannosyl-oligosaccharide 1,2-alpha-mannosidase IA OS=Homo sapiens GN=MAN1A1 PE=1 SV=3	P33908	MAN1A1	72971.7	4	5	11	GATIVDALDTLFIMEMK	K	H	0.997	55.1	27.9	16.4	0	0	1	0	0	2	1883.95	9281.49	746210	238	254
Mudpit_Aged_L3_4Left_IAF	Mannosyl-oligosaccharide 1,2-alpha-mannosidase IA OS=Homo sapiens GN=MAN1A1 PE=1 SV=3	P33908	MAN1A1	72971.7	4	5	11	GLPPVDFVPPIGVESR	R	E	0.997	44.4	25.3	15.8	44.4	0	3	0	0	2	1678.92	8151.61	7912800	170	185
Mudpit_Aged_L3_4Left_IAF	Mannosyl-oligosaccharide 1,2-alpha-mannosidase IA OS=Homo sapiens GN=MAN1A1 PE=1 SV=3	P33908	MAN1A1	72971.7	4	5	11	MYFDAVQAIETHLIR	K	K	0.997	54.3	26.1	16.4	54.3	0	0	3	0	2	1806.92	8500.11	23800000	436	450
Mudpit_Aged_L3_4Left_IAF	Fibrillin-1 OS=Homo sapiens GN=FBN1 PE=1 SV=3	P35555	FBN1	312226	4	4	6	DYLSGELGDNLK	K	M	0.997	52.7	25.9	16.3	52.7	0	1	0	0	2	1323.64	5882.02	4940090	2852	2863
Mudpit_Aged_L3_4Left_IAF	Fibrillin-1 OS=Homo sapiens GN=FBN1 PE=1 SV=3	P35555	FBN1	312226	4	4	6	EGISYLHFTK	K	K	0.966	33	26.1	15.1	33	0	0	1	0	2	1194.62	4184.64	3010800	2810	2819
Mudpit_Aged_L3_4Left_IAF	Fibrillin-1 OS=Homo sapiens GN=FBN1 PE=1 SV=3	P35555	FBN1	312226	4	4	6	GDNGDTACSNEIGVGVSK	R	A	0.997	84.2	25	18.3	84.2	0	3	0	0	2	1780.77	3298.72	5247990	1542	1559
Mudpit_Aged_L3_4Left_IAF	Fibrillin-1 OS=Homo sapiens GN=FBN1 PE=1 SV=3	P35555	FBN1	312226	4	4	6	GFIYKPDLK	K	T	0.995	33.4	25	15.1	33.4	0	1	0	0	2	1080.61	3164.03	5349860	795	803
Mudpit_Aged_L3_4Left_IAF	Histidine-rich glycoprotein OS=Homo sapiens GN=HRG PE=1 SV=1	P04196	HRG	59576.6	8	12	34	ADLFYDVEALDLESPK	R	N	0.997	120	26.7	20.5	120	0	5	3	0	2	1824.89	8940.65	123000000	220	235
Mudpit_Aged_L3_4Left_IAF	Histidine-rich glycoprotein OS=Homo sapiens GN=HRG PE=1 SV=1	P04196	HRG	59576.6	8	12	34	DGYLFQLLR	R	I	0.997	51.1	26.5	16.2	51.1	0	4	0	0	2	1124.61	8647.65	40900000	44	52
Mudpit_Aged_L3_4Left_IAF	Histidine-rich glycoprotein OS=Homo sapiens GN=HRG PE=1 SV=1	P04196	HRG	59576.6	8	12	34	DSPVLIDFFEDTER	K	Y	0.997	80.8	25.2	18	80.8	0	5	2	0	2	1682.79	9090.96	1030000000	140	153
Mudpit_Aged_L3_4Left_IAF	Histidine-rich glycoprotein OS=Homo sapiens GN=HRG PE=1 SV=1	P04196	HRG	59576.6	8	12	34	EENDDFASFR	K	V	0.997	70.6	25	18.8	69.2	0	3	0	0	2	1229.51	4097.39	56000000	167	176
Mudpit_Aged_L3_4Left_IAF	Histidine-rich glycoprotein OS=Homo sapiens GN=HRG PE=1 SV=1	P04196	HRG	59576.6	8	12	34	GEVLPLPEANFPSFPLPHHK	K	H	0.997	72.2	26.1	17.5	72.2	0	2	0	2	2	2226.17	7340.73	16300000	467	486
Mudpit_Aged_L3_4Left_IAF	Histidine-rich glycoprotein OS=Homo sapiens GN=HRG PE=1 SV=1	P04196	HRG	59576.6	8	12	34	GGEGTGYFVDFSVR	R	N	0.997	58.8	25	16.7	58.8	0	2	0	0	2	1490.69	6672.05	13400000	188	201
Mudpit_Aged_L3_4Left_IAF	Histidine-rich glycoprotein OS=Homo sapiens GN=HRG PE=1 SV=1	P04196	HRG	59576.6	8	12	34	YKEENDDFASFR	K	V	0.997	79.3	25	18	79.3	0	3	1	0	2	1520.67	2959.2	29000000	165	176
Mudpit_Aged_L3_4Left_IAF	Histidine-rich glycoprotein OS=Homo sapiens GN=HRG PE=1 SV=1	P04196	HRG	59576.6	8	12	34	YWNDCEPPDSR	K	R	0.994	33.7	25	15.1	33.7	0	2	0	0	2	1439.55	3060.38	16500000	85	95
Mudpit_Aged_L3_4Left_IAF	EH-domain containing 2, isoform CRA_a OS=Homo sapiens GN=EHD2 PE=4 SV=1	A0A024R0S6,Q9NZN4	EHD2	61163.2	8	11	13	GYDFPAVLR	R	W	0.98	29.8	27.4	14.9	29.8	0	1	0	0	2	1037.54	5998.93	11800000	168	176
Mudpit_Aged_L3_4Left_IAF	EH-domain containing 2, isoform CRA_a OS=Homo sapiens GN=EHD2 PE=4 SV=1	A0A024R0S6,Q9NZN4	EHD2	61163.2	8	11	13	LEISDEFSEAIGALR	K	G	0.997	113	27.2	20	113	0	2	1	0	2	1649.84	8916.18	36100000	194	208
Mudpit_Aged_L3_4Left_IAF	EH-domain containing 2, isoform CRA_a OS=Homo sapiens GN=EHD2 PE=4 SV=1	A0A024R0S6,Q9NZN4	EHD2	61163.2	8	11	13	LFELEEQDLFR	R	D	0.997	64.2	26.5	17	64.2	0	1	0	0	2	1438.72	8095.52	50000000	270	280
Mudpit_Aged_L3_4Left_IAF	EH-domain containing 2, isoform CRA_a OS=Homo sapiens GN=EHD2 PE=4 SV=1	A0A024R0S6,Q9NZN4	EHD2	61163.2	8	11	13	LLEALDEMLTHDIAK	K	L	0.997	62.4	26.7	16.9	62.4	0	0	3	0	2	1711.89	8267.87	11200000	378	392
Mudpit_Aged_L3_4Left_IAF	EH-domain containing 2, isoform CRA_a OS=Homo sapiens GN=EHD2 PE=4 SV=1	A0A024R0S6,Q9NZN4	EHD2	61163.2	8	11	13	LLPLEEHYR	K	F	0.99	46	26.1	15.9	46	0	1	1	0	2	1169.63	3015.75	19800000	33	41
Mudpit_Aged_L3_4Left_IAF	EH-domain containing 2, isoform CRA_a OS=Homo sapiens GN=EHD2 PE=4 SV=1	A0A024R0S6,Q9NZN4	EHD2	61163.2	8	11	13	VVGTPEVLR	K	V	0.997	41.4	25	25	32	0	1	0	0	2	969.573	2771.54	9228910	243	251
Mudpit_Aged_L3_4Left_IAF	EH-domain containing 2, isoform CRA_a OS=Homo sapiens GN=EHD2 PE=4 SV=1	A0A024R0S6,Q9NZN4	EHD2	61163.2	8	11	13	VYIGSFWSQPLLVPDNR	R	R	0.997	119	27.5	20.5	119	0	1	0	0	2	1991.04	8969.2	18200000	252	268
Mudpit_Aged_L3_4Left_IAF	EH-domain containing 2, isoform CRA_a OS=Homo sapiens GN=EHD2 PE=4 SV=1	A0A024R0S6,Q9NZN4	EHD2	61163.2	8	11	13	YDEIFYNLAPADGK	K	L	0.996	36.1	25	15.3	36.1	0	1	0	0	2	1615.76	6760.28	5642480	453	466
Mudpit_Aged_L3_4Left_IAF	Phosphatidylcholine-sterol acyltransferase (Fragment) OS=Homo sapiens GN=LCAT PE=1 SV=1	A0A140VK24_HUMAN,J3QSE5,P04180	LCAT	49579	3	3	3	LEPGQQEEYYR	R	K	0.997	74.5	25	25.1	67.1	0	1	0	0	2	1411.65	2227.89	9942840	172	182
Mudpit_Aged_L3_4Left_IAF	Phosphatidylcholine-sterol acyltransferase (Fragment) OS=Homo sapiens GN=LCAT PE=1 SV=1	A0A140VK24_HUMAN,J3QSE5,P04180	LCAT	49579	3	3	3	SSGLVSNAPGVQIR	R	V	0.997	40	26.5	15.5	40	0	1	0	0	2	1384.75	4012.02	6656950	110	123
Mudpit_Aged_L3_4Left_IAF	Phosphatidylcholine-sterol acyltransferase (Fragment) OS=Homo sapiens GN=LCAT PE=1 SV=1	A0A140VK24_HUMAN,J3QSE5,P04180	LCAT	49579	3	3	3	TYSVEYLDSSK	K	L	0.997	48.9	25	16.1	48.9	0	1	0	0	2	1291.61	3950.26	4533730	130	140
Mudpit_Aged_L3_4Left_IAF	Chromogranin-A OS=Homo sapiens GN=CHGA PE=1 SV=7	P10645	CHGA	50688.1	2	2	2	ELQDLALQGAK	K	E	0.997	39.6	30.4	15.5	39.6	0	1	0	0	2	1185.65	4122.96	4878240	78	88
Mudpit_Aged_L3_4Left_IAF	Chromogranin-A OS=Homo sapiens GN=CHGA PE=1 SV=7	P10645	CHGA	50688.1	2	2	2	YPGPQAEGDSEGLSQGLVDR	K	E	0.997	112	25	20	112	0	1	0	0	2	2074.97	5180.23	1353840	194	213
Mudpit_Aged_L3_4Left_IAF	cDNA FLJ78207, highly similar to Human complement protein component C7 mRNA OS=Homo sapiens PE=2 SV=1	A8K2T4,P10643	C7	93516.6	8	12	25	DGFVQDEGTMFPVGK	K	N	0.997	74.4	25	17.7	74.4	0	2	0	0	2	1626.75	6982.96	28400000	579	593
Mudpit_Aged_L3_4Left_IAF	cDNA FLJ78207, highly similar to Human complement protein component C7 mRNA OS=Homo sapiens PE=2 SV=1	A8K2T4,P10643	C7	93516.6	8	12	25	ELSHLPSLYDYSAYR	K	R	0.997	81.2	26.3	18.1	81.2	0	1	2	0	2	1813.88	6188.71	33100000	279	293
Mudpit_Aged_L3_4Left_IAF	cDNA FLJ78207, highly similar to Human complement protein component C7 mRNA OS=Homo sapiens PE=2 SV=1	A8K2T4,P10643	C7	93516.6	8	12	25	GGGAGFISGLSYLELDNPAGNK	R	R	0.997	92.4	26.8	18.8	92.4	0	2	2	0	2	2137.06	8501.2	25600000	379	400
Mudpit_Aged_L3_4Left_IAF	cDNA FLJ78207, highly similar to Human complement protein component C7 mRNA OS=Homo sapiens PE=2 SV=1	A8K2T4,P10643	C7	93516.6	8	12	25	LIDQYGTHYLQSGSLGGEYR	R	V	0.997	119	25.3	20.4	119	0	2	3	0	2	2257.09	5401.72	39400000	295	314
Mudpit_Aged_L3_4Left_IAF	cDNA FLJ78207, highly similar to Human complement protein component C7 mRNA OS=Homo sapiens PE=2 SV=1	A8K2T4,P10643	C7	93516.6	8	12	25	LSGNVLSYTFQVK	R	I	0.997	46.3	25.4	15.9	46.3	0	1	0	0	2	1455.78	6591.11	5853490	179	191
Mudpit_Aged_L3_4Left_IAF	cDNA FLJ78207, highly similar to Human complement protein component C7 mRNA OS=Homo sapiens PE=2 SV=1	A8K2T4,P10643	C7	93516.6	8	12	25	LTPLYELVK	K	E	0.997	39.6	25	16.7	38.3	0	3	0	0	2	1075.64	6203.28	51900000	421	429
Mudpit_Aged_L3_4Left_IAF	cDNA FLJ78207, highly similar to Human complement protein component C7 mRNA OS=Homo sapiens PE=2 SV=1	A8K2T4,P10643	C7	93516.6	8	12	25	VLFYVDSEK	R	L	0.997	53.1	25	16.3	53.1	0	4	0	0	2	1099.57	4704.12	17300000	315	323
Mudpit_Aged_L3_4Left_IAF	cDNA FLJ78207, highly similar to Human complement protein component C7 mRNA OS=Homo sapiens PE=2 SV=1	A8K2T4,P10643	C7	93516.6	8	12	25	YSAWAESVTNLPQVIK	R	Q	0.997	62.1	27.4	16.9	62.1	0	2	1	0	2	1805.94	7566.32	18100000	403	418
Mudpit_Aged_L3_4Left_IAF	HCG2043253, isoform CRA_a OS=Homo sapiens GN=hCG_2043253 PE=4 SV=1	A0A024R0P1,B4DXV6,Q16674,W4VSR3	MIA,MIA-RAB4B,hCG_2043253	14509.2	3	3	12	GQVVYVFSK	R	L	0.997	40.9	25	15.6	40.9	0	2	0	0	2	1026.56	3863.44	16500000	67	75
Mudpit_Aged_L3_4Left_IAF	HCG2043253, isoform CRA_a OS=Homo sapiens GN=hCG_2043253 PE=4 SV=1	A0A024R0P1,B4DXV6,Q16674,W4VSR3	MIA,MIA-RAB4B,hCG_2043253	14509.2	3	3	12	LFWGGSVQGDYYGDLAAR	R	L	0.997	126	25	20.9	126	0	9	0	0	2	1974.93	7847.56	19500000	82	99
Mudpit_Aged_L3_4Left_IAF	HCG2043253, isoform CRA_a OS=Homo sapiens GN=hCG_2043253 PE=4 SV=1	A0A024R0P1,B4DXV6,Q16674,W4VSR3	MIA,MIA-RAB4B,hCG_2043253	14509.2	3	3	12	LGYFPSSIVR	R	E	0.996	34.1	25.4	15.4	33.9	0	1	0	0	2	1138.63	5889.06	26600000	100	109
Mudpit_Aged_L3_4Left_IAF	Glyceraldehyde-3-phosphate dehydrogenase OS=Homo sapiens GN=GAPDH PE=1 SV=3	P04406,V9HVZ4	GAPDH,HEL-S-162eP	36053.4	9	19	57	GALQNIIPASTGAAK	R	A	0.997	38.6	25	15.6	38.4	0	4	0	0	2	1411.79	4871.95	19800000	201	215
Mudpit_Aged_L3_4Left_IAF	Glyceraldehyde-3-phosphate dehydrogenase OS=Homo sapiens GN=GAPDH PE=1 SV=3	P04406,V9HVZ4	GAPDH,HEL-S-162eP	36053.4	9	19	57	IISNASCTTNCLAPLAK	K	V	0.997	53.5	26.6	16.3	53.5	0	1	0	0	2	1835.89	5440.12	2787660	146	162
Mudpit_Aged_L3_4Left_IAF	Glyceraldehyde-3-phosphate dehydrogenase OS=Homo sapiens GN=GAPDH PE=1 SV=3	P04406,V9HVZ4	GAPDH,HEL-S-162eP	36053.4	9	19	57	LISWYDNEFGYSNR	K	V	0.997	78.3	25	17.9	78.3	0	4	0	0	2	1763.8	7163.65	36100000	310	323
Mudpit_Aged_L3_4Left_IAF	Glyceraldehyde-3-phosphate dehydrogenase OS=Homo sapiens GN=GAPDH PE=1 SV=3	P04406,V9HVZ4	GAPDH,HEL-S-162eP	36053.4	9	19	57	LVINGNPITIFQER	K	D	0.997	73	25.5	17.6	73	0	1	1	0	2	1613.9	7792.79	9727490	67	80
Mudpit_Aged_L3_4Left_IAF	Glyceraldehyde-3-phosphate dehydrogenase OS=Homo sapiens GN=GAPDH PE=1 SV=3	P04406,V9HVZ4	GAPDH,HEL-S-162eP	36053.4	9	19	57	VIHDNFGIVEGLMTTVHAITATQK	K	T	0.997	96	25	19	96	0	0	2	4	2	2595.36	8435.54	212000000	163	186
Mudpit_Aged_L3_4Left_IAF	Glyceraldehyde-3-phosphate dehydrogenase OS=Homo sapiens GN=GAPDH PE=1 SV=3	P04406,V9HVZ4	GAPDH,HEL-S-162eP	36053.4	9	19	57	VIISAPSADAPMFVMGVNHEK	R	Y	0.997	103	26.2	19.4	103	0	1	12	0	2	2213.11	5973.69	150000000	119	139
Mudpit_Aged_L3_4Left_IAF	Glyceraldehyde-3-phosphate dehydrogenase OS=Homo sapiens GN=GAPDH PE=1 SV=3	P04406,V9HVZ4	GAPDH,HEL-S-162eP	36053.4	9	19	57	VIPELNGK	K	L	0.965	25.1	25	14.6	25.1	0	1	0	0	2	869.509	2129.56	6640420	220	227
Mudpit_Aged_L3_4Left_IAF	Glyceraldehyde-3-phosphate dehydrogenase OS=Homo sapiens GN=GAPDH PE=1 SV=3	P04406,V9HVZ4	GAPDH,HEL-S-162eP	36053.4	9	19	57	VVDLMAHMASK	R	-	0.997	68.6	26	17.3	44.7	0	0	4	0	2	1217.6	1586.43	15800000	324	334
Mudpit_Aged_L3_4Left_IAF	Glyceraldehyde-3-phosphate dehydrogenase OS=Homo sapiens GN=GAPDH PE=1 SV=3	P04406,V9HVZ4	GAPDH,HEL-S-162eP	36053.4	9	19	57	WGDAGAEYVVESTGVFTTMEK	K	A	0.997	127	25	20.9	127	0	12	10	0	2	2277.04	8656.38	103000000	87	107
Mudpit_Aged_L3_4Left_IAF	Peptidyl-prolyl cis-trans isomerase OS=Homo sapiens PE=2 SV=1	A8K2Q6,P45877	PPIC	22763.5	2	2	3	TPFVVEIADW	K	-	0.997	49.5	27.5	16.1	49.5	0	1	0	0	2	1176.59	9172.22	9918830	203	212
Mudpit_Aged_L3_4Left_IAF	Peptidyl-prolyl cis-trans isomerase OS=Homo sapiens PE=2 SV=1	A8K2Q6,P45877	PPIC	22763.5	2	2	3	TVENFVALATGEK	K	G	0.997	37.4	27.1	15.3	37.4	0	2	0	0	2	1378.72	6362.23	12200000	66	78
Mudpit_Aged_L3_4Left_IAF	Fibrinogen beta chain OS=Homo sapiens GN=FGB PE=1 SV=2	P02675,V9HVY1	FGB,HEL-S-78p	55928.6	22	54	281	AHYGGFTVQNEANK	K	Y	0.997	81.8	25	18.1	81.8	0	4	6	0	2	1535.72	1548.89	275000000	354	367
Mudpit_Aged_L3_4Left_IAF	Fibrinogen beta chain OS=Homo sapiens GN=FGB PE=1 SV=2	P02675,V9HVY1	FGB,HEL-S-78p	55928.6	22	54	281	DNDGWLTSDPR	R	K	0.997	59.8	25	16.7	59.8	0	10	0	0	2	1275.56	4657.83	248000000	411	421
Mudpit_Aged_L3_4Left_IAF	Fibrinogen beta chain OS=Homo sapiens GN=FGB PE=1 SV=2	P02675,V9HVY1	FGB,HEL-S-78p	55928.6	22	54	281	DNENVVNEYSSELEK	K	H	0.997	97.7	25	19.1	97.7	0	19	2	0	2	1768.79	5635.47	318000000	164	178
Mudpit_Aged_L3_4Left_IAF	Fibrinogen beta chain OS=Homo sapiens GN=FGB PE=1 SV=2	P02675,V9HVY1	FGB,HEL-S-78p	55928.6	22	54	281	EDGGGWWYNR	K	C	0.997	67.8	25	17.2	67.8	0	13	0	0	2	1239.52	5217.38	922000000	427	436
Mudpit_Aged_L3_4Left_IAF	Fibrinogen beta chain OS=Homo sapiens GN=FGB PE=1 SV=2	P02675,V9HVY1	FGB,HEL-S-78p	55928.6	22	54	281	EEAPSLRPAPPPISGGGYR	R	A	0.994	46	26.6	15.9	46	0	0	1	0	2	1951	4292.97	26400000	54	72
Mudpit_Aged_L3_4Left_IAF	Fibrinogen beta chain OS=Homo sapiens GN=FGB PE=1 SV=2	P02675,V9HVY1	FGB,HEL-S-78p	55928.6	22	54	281	GGETSEMYLIQPDSSVKPYR	K	V	0.997	133	25.8	21.3	133	0	8	12	2	2	2257.08	4924.49	292000000	248	267
Mudpit_Aged_L3_4Left_IAF	Fibrinogen beta chain OS=Homo sapiens GN=FGB PE=1 SV=2	P02675,V9HVY1	FGB,HEL-S-78p	55928.6	22	54	281	GTAGNALMDGASQLMGENR	R	T	0.997	88.9	25	18.6	88.9	0	1	0	0	2	1892.86	6697.39	3097110	377	395
Mudpit_Aged_L3_4Left_IAF	Fibrinogen beta chain OS=Homo sapiens GN=FGB PE=1 SV=2	P02675,V9HVY1	FGB,HEL-S-78p	55928.6	22	54	281	HGTDDGVVWMNWK	K	G	0.997	78.4	25	17.9	78.4	0	23	14	0	2	1560.69	5243.36	426000000	459	471
Mudpit_Aged_L3_4Left_IAF	Fibrinogen beta chain OS=Homo sapiens GN=FGB PE=1 SV=2	P02675,V9HVY1	FGB,HEL-S-78p	55928.6	22	54	281	HQLYIDETVNSNIPTNLR	K	V	0.997	106	26.3	19.6	106	0	4	6	0	2	2127.08	5497.57	101000000	179	196
Mudpit_Aged_L3_4Left_IAF	Fibrinogen beta chain OS=Homo sapiens GN=FGB PE=1 SV=2	P02675,V9HVY1	FGB,HEL-S-78p	55928.6	22	54	281	IRPFFPQQ	K	-	0.99	33.8	28.1	15.1	33.8	0	2	0	0	2	1032.56	4638.57	172000000	484	491
Mudpit_Aged_L3_4Left_IAF	Fibrinogen beta chain OS=Homo sapiens GN=FGB PE=1 SV=2	P02675,V9HVY1	FGB,HEL-S-78p	55928.6	22	54	281	KGGETSEMYLIQPDSSVKPYR	R	V	0.997	90.4	25.9	18.7	90.4	0	1	9	5	2	2385.18	3652.56	199000000	247	267
Mudpit_Aged_L3_4Left_IAF	Fibrinogen beta chain OS=Homo sapiens GN=FGB PE=1 SV=2	P02675,V9HVY1	FGB,HEL-S-78p	55928.6	22	54	281	LESDVSAQMEYCR	K	T	0.997	39.3	25	15.5	39.3	0	1	0	0	2	1588.66	4155.96	10600000	212	224
Mudpit_Aged_L3_4Left_IAF	Fibrinogen beta chain OS=Homo sapiens GN=FGB PE=1 SV=2	P02675,V9HVY1	FGB,HEL-S-78p	55928.6	22	54	281	MGPTELLIEMEDWK	R	G	0.997	136	25	21.5	136	0	17	12	0	2	1707.8	8816.41	565000000	335	348
Mudpit_Aged_L3_4Left_IAF	Fibrinogen beta chain OS=Homo sapiens GN=FGB PE=1 SV=2	P02675,V9HVY1	FGB,HEL-S-78p	55928.6	22	54	281	MGPTELLIEMEDWKGDK	R	V	0.997	67.2	25.1	17.2	67.2	0	0	5	0	2	1991.95	8376.07	24000000	335	351
Mudpit_Aged_L3_4Left_IAF	Fibrinogen beta chain OS=Homo sapiens GN=FGB PE=1 SV=2	P02675,V9HVY1	FGB,HEL-S-78p	55928.6	22	54	281	NSVDELNNNVEAVSQTSSSSFQYMYLLK	R	D	0.997	129	25	21	129	0	0	18	2	2	3167.48	8397.68	120000000	125	152
Mudpit_Aged_L3_4Left_IAF	Fibrinogen beta chain OS=Homo sapiens GN=FGB PE=1 SV=2	P02675,V9HVY1	FGB,HEL-S-78p	55928.6	22	54	281	NYCGLPGEYWLGNDK	K	I	0.997	62.9	25	16.9	62.9	0	7	0	0	2	1786.77	8289.58	39400000	314	328
Mudpit_Aged_L3_4Left_IAF	Fibrinogen beta chain OS=Homo sapiens GN=FGB PE=1 SV=2	P02675,V9HVY1	FGB,HEL-S-78p	55928.6	22	54	281	QGFGNVATNTDGK	K	N	0.997	92.5	26	18.8	92.5	0	11	0	0	2	1308.62	1794.05	287000000	301	313
Mudpit_Aged_L3_4Left_IAF	Fibrinogen beta chain OS=Homo sapiens GN=FGB PE=1 SV=2	P02675,V9HVY1	FGB,HEL-S-78p	55928.6	22	54	281	QVKDNENVVNEYSSELEK	K	H	0.997	109	25.1	19.8	109	0	3	2	0	2	2124.01	4565.87	25700000	161	178
Mudpit_Aged_L3_4Left_IAF	Fibrinogen beta chain OS=Homo sapiens GN=FGB PE=1 SV=2	P02675,V9HVY1	FGB,HEL-S-78p	55928.6	22	54	281	TMTIHNGMFFSTYDR	R	D	0.997	86.2	25	18.4	86.2	0	4	14	0	2	1820.81	4660.44	190000000	396	410
Mudpit_Aged_L3_4Left_IAF	Fibrinogen beta chain OS=Homo sapiens GN=FGB PE=1 SV=2	P02675,V9HVY1	FGB,HEL-S-78p	55928.6	22	54	281	VYCDMNTENGGWTVIQNR	R	Q	0.997	59.7	25	16.7	59.7	0	9	2	0	2	2157.93	5448.22	190000000	268	285
Mudpit_Aged_L3_4Left_IAF	Fibrinogen beta chain OS=Homo sapiens GN=FGB PE=1 SV=2	P02675,V9HVY1	FGB,HEL-S-78p	55928.6	22	54	281	WDPYKQGFGNVATNTDGK	K	N	0.983	39.7	25	15.5	39.7	0	0	2	0	2	1997.94	4694.54	7275640	296	313
Mudpit_Aged_L3_4Left_IAF	Fibrinogen beta chain OS=Homo sapiens GN=FGB PE=1 SV=2	P02675,V9HVY1	FGB,HEL-S-78p	55928.6	22	54	281	YYWGGQYTWDMAK	R	H	0.997	67.7	25	17.2	67.7	0	29	1	0	2	1668.72	6890.83	210000000	446	458
Mudpit_Aged_L3_4Left_IAF	Collagen alpha-1(IX) chain OS=Homo sapiens GN=COL9A1 PE=1 SV=3	A0A1B1SMR9_HUMAN,P20849	COL9A1	91870.9	2	2	2	GPIDIDGFAVLGK	R	L	0.996	37.1	27.7	15.3	37.1	0	1	0	0	2	1301.71	7916.06	3771310	210	222
Mudpit_Aged_L3_4Left_IAF	Collagen alpha-1(IX) chain OS=Homo sapiens GN=COL9A1 PE=1 SV=3	A0A1B1SMR9_HUMAN,P20849	COL9A1	91870.9	2	2	2	IESLPIKPR	R	G	0.974	40.5	25	15.5	40.5	0	0	1	0	2	1052.65	2045.04	2930620	201	209
Mudpit_Aged_L3_4Left_IAF	Osteoglycin (Osteoinductive factor, mimecan), isoform CRA_a OS=Homo sapiens GN=OGN PE=2 SV=1	A8K0R3,B4DI63,P20774	OGN	33925	9	15	76	DFADIPNLR	K	R	0.997	50.1	29	16.1	50.1	0	5	0	0	2	1060.54	6200.04	97500000	138	146
Mudpit_Aged_L3_4Left_IAF	Osteoglycin (Osteoinductive factor, mimecan), isoform CRA_a OS=Homo sapiens GN=OGN PE=2 SV=1	A8K0R3,B4DI63,P20774	OGN	33925	9	15	76	EKETVIIPNEK	K	S	0.997	51.9	25.7	16.2	51.9	0	1	0	0	2	1299.72	1575.29	12800000	59	69
Mudpit_Aged_L3_4Left_IAF	Osteoglycin (Osteoinductive factor, mimecan), isoform CRA_a OS=Homo sapiens GN=OGN PE=2 SV=1	A8K0R3,B4DI63,P20774	OGN	33925	9	15	76	ESAYLYAR	K	F	0.99	54.1	25	24.5	46	0	2	0	0	2	972.478	2067.94	15400000	120	127
Mudpit_Aged_L3_4Left_IAF	Osteoglycin (Osteoinductive factor, mimecan), isoform CRA_a OS=Homo sapiens GN=OGN PE=2 SV=1	A8K0R3,B4DI63,P20774	OGN	33925	9	15	76	ETVIIPNEK	K	S	0.995	32.8	25.5	15	32.8	0	1	0	0	2	1042.58	2488.61	8237920	61	69
Mudpit_Aged_L3_4Left_IAF	Osteoglycin (Osteoinductive factor, mimecan), isoform CRA_a OS=Homo sapiens GN=OGN PE=2 SV=1	A8K0R3,B4DI63,P20774	OGN	33925	9	15	76	LDFTGNLIEDIEDGTFSK	R	L	0.997	165	26	23.3	165	0	14	4	0	2	2013.97	9164.11	1610000000	148	165
Mudpit_Aged_L3_4Left_IAF	Osteoglycin (Osteoinductive factor, mimecan), isoform CRA_a OS=Homo sapiens GN=OGN PE=2 SV=1	A8K0R3,B4DI63,P20774	OGN	33925	9	15	76	LEGNPIVLGK	R	H	0.997	66.6	25	17.2	66.6	0	12	0	0	2	1039.61	3835.82	248000000	272	281
Mudpit_Aged_L3_4Left_IAF	Osteoglycin (Osteoinductive factor, mimecan), isoform CRA_a OS=Homo sapiens GN=OGN PE=2 SV=1	A8K0R3,B4DI63,P20774	OGN	33925	9	15	76	LNNLTFLYLDHNALESVPLNLPESLR	K	V	0.997	88.9	25	18.6	88.9	0	2	4	1	2	2995.59	9012.2	1180000000	212	237
Mudpit_Aged_L3_4Left_IAF	Osteoglycin (Osteoinductive factor, mimecan), isoform CRA_a OS=Homo sapiens GN=OGN PE=2 SV=1	A8K0R3,B4DI63,P20774	OGN	33925	9	15	76	LSLLEELSLAENQLLK	K	L	0.997	102	25	19.4	102	0	4	3	0	2	1813.03	9221.42	272000000	166	181
Mudpit_Aged_L3_4Left_IAF	Osteoglycin (Osteoinductive factor, mimecan), isoform CRA_a OS=Homo sapiens GN=OGN PE=2 SV=1	A8K0R3,B4DI63,P20774	OGN	33925	9	15	76	RLDFTGNLIEDIEDGTFSK	R	L	0.997	102	27.4	19.4	102	0	9	13	1	2	2170.07	8634.48	921000000	147	165
Mudpit_Aged_L3_4Left_IAF	14-3-3 protein epsilon OS=Homo sapiens GN=YWHAE PE=1 SV=1	P62258,V9HW98	HEL2,YWHAE	29175	5	6	11	AAFDDAIAELDTLSEESYK	K	D	0.995	45.7	25	15.9	45.7	0	0	2	0	2	2087.97	9054.51	11800000	197	215
Mudpit_Aged_L3_4Left_IAF	14-3-3 protein epsilon OS=Homo sapiens GN=YWHAE PE=1 SV=1	P62258,V9HW98	HEL2,YWHAE	29175	5	6	11	DSTLIMQLLR	K	D	0.997	54.3	27.3	16.4	54.3	0	5	0	0	2	1205.66	7952.24	29400000	216	225
Mudpit_Aged_L3_4Left_IAF	14-3-3 protein epsilon OS=Homo sapiens GN=YWHAE PE=1 SV=1	P62258,V9HW98	HEL2,YWHAE	29175	5	6	11	EAAENSLVAYK	K	A	0.997	80.8	27.9	18.1	80.8	0	1	0	0	2	1194.6	2552.22	5925470	143	153
Mudpit_Aged_L3_4Left_IAF	14-3-3 protein epsilon OS=Homo sapiens GN=YWHAE PE=1 SV=1	P62258,V9HW98	HEL2,YWHAE	29175	5	6	11	NLLSVAYK	R	N	0.99	41.8	25.6	36.2	21.2	0	2	0	0	2	907.525	4212.51	14700000	43	50
Mudpit_Aged_L3_4Left_IAF	14-3-3 protein epsilon OS=Homo sapiens GN=YWHAE PE=1 SV=1	P62258,V9HW98	HEL2,YWHAE	29175	5	6	11	YDEMVESMK	R	K	0.997	41.9	25	15.6	41.9	0	1	0	0	2	1131.47	2715.2	2103780	20	28
Mudpit_Aged_L3_4Left_IAF	Reticulocalbin-1 OS=Homo sapiens GN=RCN1 PE=1 SV=1	Q15293,V9HW95	HEL-S-84,RCN1	38891.2	3	3	4	EIVVLETLEDIDK	K	N	0.997	43.8	27	15.7	43.8	0	1	0	0	2	1515.82	8738.57	2362490	205	217
Mudpit_Aged_L3_4Left_IAF	Reticulocalbin-1 OS=Homo sapiens GN=RCN1 PE=1 SV=1	Q15293,V9HW95	HEL-S-84,RCN1	38891.2	3	3	4	HWILPQDYDHAQAEAR	R	H	0.995	51.4	25	16.2	51.4	0	0	1	0	2	1949.93	3887.49	25100000	271	286
Mudpit_Aged_L3_4Left_IAF	Reticulocalbin-1 OS=Homo sapiens GN=RCN1 PE=1 SV=1	Q15293,V9HW95	HEL-S-84,RCN1	38891.2	3	3	4	IDNDGDGFVTTEELK	R	T	0.997	75.3	25	17.7	75.3	0	2	0	0	2	1652.77	5115.2	6413020	91	105
Mudpit_Aged_L3_4Left_IAF	Neutral amino acid transporter B(0) OS=Homo sapiens GN=SLC1A5 PE=1 SV=2	Q15758,Q59ES3,Q71UA6	SLC1A5	56599.8	2	2	3	EVLDSFLDLAR	K	N	0.997	75.7	26.5	17.7	75.7	0	2	0	0	2	1277.67	8568.62	5640500	179	189
Mudpit_Aged_L3_4Left_IAF	Neutral amino acid transporter B(0) OS=Homo sapiens GN=SLC1A5 PE=1 SV=2	Q15758,Q59ES3,Q71UA6	SLC1A5	56599.8	2	2	3	NIFPSNLVSAAFR	R	S	0.997	35.7	26.6	15.2	35.7	0	1	0	0	2	1435.77	8119.15	2026380	190	202
Mudpit_Aged_L3_4Left_IAF	Calreticulin OS=Homo sapiens GN=CALR PE=1 SV=1	P27797,Q53G71,V9HW88	CALR,HEL-S-99n	48142.9	2	2	2	DDEFTHLYTLIVRPDNTYEVK	K	I	0.985	38	26	15.4	38	0	0	1	0	2	2568.26	8392.74	4391670	165	185
Mudpit_Aged_L3_4Left_IAF	Calreticulin OS=Homo sapiens GN=CALR PE=1 SV=1	P27797,Q53G71,V9HW88	CALR,HEL-S-99n	48142.9	2	2	2	KPEDWDEEMDGEWEPPVIQNPEYK	K	G	0.997	57	25	16.6	57	0	0	1	0	2	2960.29	7419.81	1664980	249	272
Mudpit_Aged_L3_4Left_IAF	Transitional endoplasmic reticulum ATPase OS=Homo sapiens GN=VCP PE=1 SV=4	P55072,Q96IF9,V9HW80	HEL-S-70,VCP	89324.8	2	2	2	EVDIGIPDATGR	R	L	0.996	35.2	27.6	15.2	35.2	0	1	0	0	2	1242.63	5117.89	4261500	366	377
Mudpit_Aged_L3_4Left_IAF	Transitional endoplasmic reticulum ATPase OS=Homo sapiens GN=VCP PE=1 SV=4	P55072,Q96IF9,V9HW80	HEL-S-70,VCP	89324.8	2	2	2	LDQLIYIPLPDEK	R	S	0.997	67.7	33.8	17.2	67.7	0	1	0	0	2	1556.86	8257.88	7902970	639	651
Mudpit_Aged_L3_4Left_IAF	DnaJ (Hsp40) homolog, subfamily C, member 3 OS=Homo sapiens GN=DNAJC3 PE=2 SV=1	A8KA82,Q13217	DNAJC3	57582.2	5	5	7	AALPDLTK	K	V	0.99	53.1	25	17.4	52	0	2	0	0	2	828.483	2837.78	13200000	89	96
Mudpit_Aged_L3_4Left_IAF	DnaJ (Hsp40) homolog, subfamily C, member 3 OS=Homo sapiens GN=DNAJC3 PE=2 SV=1	A8KA82,Q13217	DNAJC3	57582.2	5	5	7	FIDIAAAK	K	E	0.99	39.8	25.7	21.7	33.6	0	1	0	0	2	848.488	3630.33	5097520	439	446
Mudpit_Aged_L3_4Left_IAF	DnaJ (Hsp40) homolog, subfamily C, member 3 OS=Homo sapiens GN=DNAJC3 PE=2 SV=1	A8KA82,Q13217	DNAJC3	57582.2	5	5	7	ISTLYYQLGDHELSLSEVR	K	E	0.997	80.9	26.6	18.1	80.9	0	0	1	0	2	2223.13	6888.1	8749060	228	246
Mudpit_Aged_L3_4Left_IAF	DnaJ (Hsp40) homolog, subfamily C, member 3 OS=Homo sapiens GN=DNAJC3 PE=2 SV=1	A8KA82,Q13217	DNAJC3	57582.2	5	5	7	LALQWHPDNFQNEEEK	K	K	0.95	29.6	25	14.9	29.6	0	0	1	0	2	1997.94	5100.58	5267680	417	432
Mudpit_Aged_L3_4Left_IAF	DnaJ (Hsp40) homolog, subfamily C, member 3 OS=Homo sapiens GN=DNAJC3 PE=2 SV=1	A8KA82,Q13217	DNAJC3	57582.2	5	5	7	LIESAEELIR	K	D	0.997	57.3	25.7	16.6	57.3	0	2	0	0	2	1172.65	5422.26	38600000	271	280
Mudpit_Aged_L3_4Left_IAF	Spondin-1 OS=Homo sapiens GN=SPON1 PE=1 SV=2	Q9HCB6	SPON1	90973.6	2	2	2	AAPSAEFSVDR	R	T	0.997	35.9	27.2	15.2	35.9	0	1	0	0	2	1149.55	2641.89	5058700	299	309
Mudpit_Aged_L3_4Left_IAF	Spondin-1 OS=Homo sapiens GN=SPON1 PE=1 SV=2	Q9HCB6	SPON1	90973.6	2	2	2	QQSDEVLTVIK	R	A	0.992	32.9	27.4	15.1	32.9	0	1	0	0	2	1259.68	4395.98	3275030	274	284
Mudpit_Aged_L3_4Left_IAF	Galectin OS=Homo sapiens GN=hCG_22119 PE=4 SV=1	A0A024R693,P17931,Q59FR8,Q6FGL0,Q86TY5	LGALS3,hCG_22119	26152.8	2	3	4	IQVLVEPDHFK	K	V	0.997	54	25.7	16.4	54	0	1	2	0	2	1324.73	4288.52	19800000	200	210
Mudpit_Aged_L3_4Left_IAF	Galectin OS=Homo sapiens GN=hCG_22119 PE=4 SV=1	A0A024R693,P17931,Q59FR8,Q6FGL0,Q86TY5	LGALS3,hCG_22119	26152.8	2	3	4	VAVNDAHLLQYNHR	K	V	0.997	74.6	29.3	17.7	74.6	0	0	1	0	2	1649.85	2308.39	7606320	211	224
Mudpit_Aged_L3_4Left_IAF	Peroxiredoxin-1 (Fragment) OS=Homo sapiens GN=PRDX1 PE=1 SV=1	A0A0A0MSI0,Q06830	PRDX1	22110.9	7	7	13	ADEGISFR	K	G	0.99	42.6	26.9	17	41.2	0	1	0	0	2	894.432	2413.45	16600000	121	128
Mudpit_Aged_L3_4Left_IAF	Peroxiredoxin-1 (Fragment) OS=Homo sapiens GN=PRDX1 PE=1 SV=1	A0A0A0MSI0,Q06830	PRDX1	22110.9	7	7	13	DISLSDYK	K	G	0.975	24.9	25	14.6	24.9	0	1	0	0	2	940.462	3925.66	6042500	28	35
Mudpit_Aged_L3_4Left_IAF	Peroxiredoxin-1 (Fragment) OS=Homo sapiens GN=PRDX1 PE=1 SV=1	A0A0A0MSI0,Q06830	PRDX1	22110.9	7	7	13	GLFIIDDK	R	G	0.99	37.5	25.9	15.3	37.5	0	2	0	0	2	920.509	5846.77	23800000	129	136
Mudpit_Aged_L3_4Left_IAF	Peroxiredoxin-1 (Fragment) OS=Homo sapiens GN=PRDX1 PE=1 SV=1	A0A0A0MSI0,Q06830	PRDX1	22110.9	7	7	13	LVQAFQFTDK	R	H	0.997	61	25.1	16.8	61	0	3	0	0	2	1196.63	5071.03	16500000	159	168
Mudpit_Aged_L3_4Left_IAF	Peroxiredoxin-1 (Fragment) OS=Homo sapiens GN=PRDX1 PE=1 SV=1	A0A0A0MSI0,Q06830	PRDX1	22110.9	7	7	13	QGGLGPMNIPLVSDPK	K	R	0.997	51.2	26.5	16.2	51.2	0	2	0	0	2	1622.86	6999.21	6458190	94	109
Mudpit_Aged_L3_4Left_IAF	Peroxiredoxin-1 (Fragment) OS=Homo sapiens GN=PRDX1 PE=1 SV=1	A0A0A0MSI0,Q06830	PRDX1	22110.9	7	7	13	QITVNDLPVGR	R	S	0.997	57.9	26.3	16.6	57.9	0	2	0	0	2	1211.67	4724.23	50300000	141	151
Mudpit_Aged_L3_4Left_IAF	Peroxiredoxin-1 (Fragment) OS=Homo sapiens GN=PRDX1 PE=1 SV=1	A0A0A0MSI0,Q06830	PRDX1	22110.9	7	7	13	TIAQDYGVLK	R	A	0.997	48.2	25.9	16	48.2	0	2	0	0	2	1107.6	3991.67	18800000	111	120
Mudpit_Aged_L3_4Left_IAF	cDNA, FLJ94534, highly similar to Homo sapiens capping protein (actin filament), gelsolin-like(CAPG), mRNA OS=Homo sapiens PE=2 SV=1	B2R9S4,B4DU58,P40121,V9HW69	CAPG,HEL-S-66	38498.9	2	3	3	EGNPEEDLTADK	K	A	0.997	62.1	25	16.9	62.1	0	1	0	0	2	1317.58	2028.18	4668930	232	243
Mudpit_Aged_L3_4Left_IAF	cDNA, FLJ94534, highly similar to Homo sapiens capping protein (actin filament), gelsolin-like(CAPG), mRNA OS=Homo sapiens PE=2 SV=1	B2R9S4,B4DU58,P40121,V9HW69	CAPG,HEL-S-66	38498.9	2	3	3	QAALQVAEGFISR	R	M	0.997	71.1	26.6	17.4	71.1	0	1	1	0	2	1389.75	6549.39	5726810	307	319
Mudpit_Aged_L3_4Left_IAF	Epididymis luminal protein 214 OS=Homo sapiens GN=HEL-214 PE=2 SV=1	V9HW68	HEL-214	51714.4	15	24	131	AEDTAVYYCAR	R	D	0.972	34.1	25	15.1	34.1	0	1	0	0	2	1319.56	2919.67	1630960	107	117
Mudpit_Aged_L3_4Left_IAF	Epididymis luminal protein 214 OS=Homo sapiens GN=HEL-214 PE=2 SV=1	V9HW68	HEL-214	51714.4	15	24	131	ALPAPIEK	K	T	0.99	37.4	25	15.3	37.4	0	9	0	0	2	838.503	2063.05	384000000	350	357
Mudpit_Aged_L3_4Left_IAF	Epididymis luminal protein 214 OS=Homo sapiens GN=HEL-214 PE=2 SV=1	V9HW68	HEL-214	51714.4	15	24	131	EPQVYTLPPSR	R	D	0.997	58.3	26.6	16.6	58.3	0	16	6	0	2	1286.67	3828.74	4410000000	368	378
Mudpit_Aged_L3_4Left_IAF	Epididymis luminal protein 214 OS=Homo sapiens GN=HEL-214 PE=2 SV=1	V9HW68	HEL-214	51714.4	15	24	131	FNWYVDGVEVHNAK	K	T	0.997	63.7	28.7	17	63.7	0	8	17	0	2	1677.8	5270.73	3590000000	298	311
Mudpit_Aged_L3_4Left_IAF	Epididymis luminal protein 214 OS=Homo sapiens GN=HEL-214 PE=2 SV=1	V9HW68	HEL-214	51714.4	15	24	131	GFYPSDIAVEWESNGQPENNYK	K	T	0.997	79.5	25	18	79.5	0	5	2	0	2	2544.13	7653.57	102000000	394	415
Mudpit_Aged_L3_4Left_IAF	Epididymis luminal protein 214 OS=Homo sapiens GN=HEL-214 PE=2 SV=1	V9HW68	HEL-214	51714.4	15	24	131	GLEWVANIK	K	Q	0.997	39.8	27.7	15.5	39.8	0	3	0	0	2	1029.57	5791.75	33900000	63	71
Mudpit_Aged_L3_4Left_IAF	Epididymis luminal protein 214 OS=Homo sapiens GN=HEL-214 PE=2 SV=1	V9HW68	HEL-214	51714.4	15	24	131	GPSVFPLAPSSK	K	S	0.997	50.9	26.6	16.2	50.9	0	7	0	0	2	1186.65	4962.76	117000000	145	156
Mudpit_Aged_L3_4Left_IAF	Epididymis luminal protein 214 OS=Homo sapiens GN=HEL-214 PE=2 SV=1	V9HW68	HEL-214	51714.4	15	24	131	NQVSLTCLVK	K	G	0.997	51.8	26.8	16.2	51.8	0	3	0	0	2	1162.61	5351.47	29000000	384	393
Mudpit_Aged_L3_4Left_IAF	Epididymis luminal protein 214 OS=Homo sapiens GN=HEL-214 PE=2 SV=1	V9HW68	HEL-214	51714.4	15	24	131	NSLYLQMNSLR	K	A	0.997	51.6	25.9	54	13.8	0	5	0	0	2	1354.68	5455.88	46800000	96	106
Mudpit_Aged_L3_4Left_IAF	Epididymis luminal protein 214 OS=Homo sapiens GN=HEL-214 PE=2 SV=1	V9HW68	HEL-214	51714.4	15	24	131	STSGGTAALGCLVK	K	D	0.997	54.3	27.5	16.4	54.3	0	2	0	0	2	1322.66	4588.89	9130570	157	170
Mudpit_Aged_L3_4Left_IAF	Epididymis luminal protein 214 OS=Homo sapiens GN=HEL-214 PE=2 SV=1	V9HW68	HEL-214	51714.4	15	24	131	TPEVTCVVVDVSHEDPEVK	R	F	0.997	92.6	26.2	18.8	92.6	0	1	1	0	2	2140.01	6059.54	5493470	279	297
Mudpit_Aged_L3_4Left_IAF	Epididymis luminal protein 214 OS=Homo sapiens GN=HEL-214 PE=2 SV=1	V9HW68	HEL-214	51714.4	15	24	131	TTPPVLDSDGSFFLYSK	K	L	0.997	125	26.3	20.8	125	0	20	12	0	2	1873.92	7924.91	5200000000	416	432
Mudpit_Aged_L3_4Left_IAF	Epididymis luminal protein 214 OS=Homo sapiens GN=HEL-214 PE=2 SV=1	V9HW68	HEL-214	51714.4	15	24	131	VSNKALPAPIEK	K	T	0.997	56.8	25	16.5	56.8	0	1	4	0	2	1266.74	1457.13	19900000	346	357
Mudpit_Aged_L3_4Left_IAF	Epididymis luminal protein 214 OS=Homo sapiens GN=HEL-214 PE=2 SV=1	V9HW68	HEL-214	51714.4	15	24	131	VVSVLTVLHQDWLNGK	R	E	0.995	48.2	25	16	48.2	0	0	2	0	2	1808.01	7965.46	11300000	325	340
Mudpit_Aged_L3_4Left_IAF	Epididymis luminal protein 214 OS=Homo sapiens GN=HEL-214 PE=2 SV=1	V9HW68	HEL-214	51714.4	15	24	131	WQQGNVFSCSVMHEALHNHYTQK	R	S	0.994	47.3	25	16	47.3	0	0	2	3	2	2802.25	5121.83	54800000	440	462
Mudpit_Aged_L3_4Left_IAF	Fibromodulin, isoform CRA_a OS=Homo sapiens GN=FMOD PE=4 SV=1	A0A024R971,Q06828	FMOD	43180.4	10	21	108	ELHLDHNQISR	R	V	0.997	51	28.1	16.2	51	0	3	6	0	2	1361.69	1342.3	334000000	180	190
Mudpit_Aged_L3_4Left_IAF	Fibromodulin, isoform CRA_a OS=Homo sapiens GN=FMOD PE=4 SV=1	A0A024R971,Q06828	FMOD	43180.4	10	21	108	INEFSISSFCTVVDVVNFSK	R	L	0.992	65.5	27.7	17.1	65.5	0	3	1	0	2	2293.11	9107.82	23200000	325	344
Mudpit_Aged_L3_4Left_IAF	Fibromodulin, isoform CRA_a OS=Homo sapiens GN=FMOD PE=4 SV=1	A0A024R971,Q06828	FMOD	43180.4	10	21	108	IPPVNTNLENLYLQGNR	K	I	0.997	127	25.4	20.9	127	0	14	12	0	2	1955.03	6836.02	2560000000	308	324
Mudpit_Aged_L3_4Left_IAF	Fibromodulin, isoform CRA_a OS=Homo sapiens GN=FMOD PE=4 SV=1	A0A024R971,Q06828	FMOD	43180.4	10	21	108	KVPDGLPSALEQLYMEHNNVYTVPDSYFR	R	G	0.996	65.9	25.3	17.1	65.9	0	0	15	22	2	3398.64	8626.53	1660000000	237	265
Mudpit_Aged_L3_4Left_IAF	Fibromodulin, isoform CRA_a OS=Homo sapiens GN=FMOD PE=4 SV=1	A0A024R971,Q06828	FMOD	43180.4	10	21	108	LYLDHNNLTR	R	M	0.997	60.6	26.7	20.7	56.7	0	2	3	0	2	1258.65	2200.55	50500000	160	169
Mudpit_Aged_L3_4Left_IAF	Fibromodulin, isoform CRA_a OS=Homo sapiens GN=FMOD PE=4 SV=1	A0A024R971,Q06828	FMOD	43180.4	10	21	108	SAMPADAPLCLR	R	L	0.997	48.6	25	17.6	47.1	0	3	0	0	2	1302.62	5388.55	61200000	358	369
Mudpit_Aged_L3_4Left_IAF	Fibromodulin, isoform CRA_a OS=Homo sapiens GN=FMOD PE=4 SV=1	A0A024R971,Q06828	FMOD	43180.4	10	21	108	SLILLDLSYNHLR	R	K	0.997	66.9	25.1	18.3	65.8	0	2	7	0	2	1556.88	7235.85	160000000	224	236
Mudpit_Aged_L3_4Left_IAF	Fibromodulin, isoform CRA_a OS=Homo sapiens GN=FMOD PE=4 SV=1	A0A024R971,Q06828	FMOD	43180.4	10	21	108	VPDGLPSALEQLYMEHNNVYTVPDSYFR	K	G	0.996	63.3	25.2	17	63.3	0	0	5	1	2	3254.55	8950.32	196000000	238	265
Mudpit_Aged_L3_4Left_IAF	Fibromodulin, isoform CRA_a OS=Homo sapiens GN=FMOD PE=4 SV=1	A0A024R971,Q06828	FMOD	43180.4	10	21	108	VPNNALEGLENLTALYLQHNEIQEVGSSMR	R	G	0.997	117	25.3	20.3	117	0	0	3	0	2	3339.66	9043.41	20000000	191	220
Mudpit_Aged_L3_4Left_IAF	Fibromodulin, isoform CRA_a OS=Homo sapiens GN=FMOD PE=4 SV=1	A0A024R971,Q06828	FMOD	43180.4	10	21	108	YLPFVPSR	K	M	0.99	43.2	27	23.3	35.5	0	6	0	0	2	978.541	5400.73	194000000	99	106
Mudpit_Aged_L3_4Left_IAF	Annexin OS=Homo sapiens GN=HEL-S-270 PE=2 SV=1	V9HW65	HEL-S-270	38578.1	15	21	39	AEDGSVIDYELIDQDAR	R	D	0.997	114	25	20.1	114	0	5	0	0	2	1908.88	6824.93	36300000	180	196
Mudpit_Aged_L3_4Left_IAF	Annexin OS=Homo sapiens GN=HEL-S-270 PE=2 SV=1	V9HW65	HEL-S-270	38578.1	15	21	39	DALNIETAIK	R	T	0.986	33.8	29.6	15.1	33.8	0	2	0	0	2	1087.6	5266.21	21500000	38	47
Mudpit_Aged_L3_4Left_IAF	Annexin OS=Homo sapiens GN=HEL-S-270 PE=2 SV=1	V9HW65	HEL-S-270	38578.1	15	21	39	DIISDTSGDFR	K	K	0.997	59.2	25	16.7	59.2	0	1	0	0	2	1225.57	5436.79	23200000	158	168
Mudpit_Aged_L3_4Left_IAF	Annexin OS=Homo sapiens GN=HEL-S-270 PE=2 SV=1	V9HW65	HEL-S-270	38578.1	15	21	39	DIISDTSGDFRK	K	L	0.997	46.2	26.2	19.5	42.6	0	2	0	0	2	1353.66	4016.94	7911430	158	169
Mudpit_Aged_L3_4Left_IAF	Annexin OS=Homo sapiens GN=HEL-S-270 PE=2 SV=1	V9HW65	HEL-S-270	38578.1	15	21	39	GVDEVTIVNILTNR	K	S	0.997	85.4	26	18.3	85.4	0	2	2	0	2	1542.85	8404.59	21200000	50	63
Mudpit_Aged_L3_4Left_IAF	Annexin OS=Homo sapiens GN=HEL-S-270 PE=2 SV=1	V9HW65	HEL-S-270	38578.1	15	21	39	LSLEGDHSTPPSAYGSVK	K	A	0.997	69.6	26.8	17.4	69.6	0	0	3	0	2	1844.9	3380.72	33600000	11	28
Mudpit_Aged_L3_4Left_IAF	Annexin OS=Homo sapiens GN=HEL-S-270 PE=2 SV=1	V9HW65	HEL-S-270	38578.1	15	21	39	QDIAFAYQR	R	R	0.997	69.2	27.4	21.9	64.6	0	1	0	0	2	1111.55	3699.8	8678730	69	77
Mudpit_Aged_L3_4Left_IAF	Annexin OS=Homo sapiens GN=HEL-S-270 PE=2 SV=1	V9HW65	HEL-S-270	38578.1	15	21	39	RAEDGSVIDYELIDQDAR	R	D	0.997	105	25.4	19.6	105	0	2	3	0	2	2064.98	5661.15	31900000	179	196
Mudpit_Aged_L3_4Left_IAF	Annexin OS=Homo sapiens GN=HEL-S-270 PE=2 SV=1	V9HW65	HEL-S-270	38578.1	15	21	39	SALSGHLETVILGLLK	K	T	0.997	99.4	25	19.2	99.4	0	1	1	0	2	1650.98	8927.25	99100000	89	104
Mudpit_Aged_L3_4Left_IAF	Annexin OS=Homo sapiens GN=HEL-S-270 PE=2 SV=1	V9HW65	HEL-S-270	38578.1	15	21	39	SLYYYIQQDTK	K	G	0.997	43.2	26	15.7	43.2	0	3	0	0	2	1421.69	5048.69	30300000	314	324
Mudpit_Aged_L3_4Left_IAF	Annexin OS=Homo sapiens GN=HEL-S-270 PE=2 SV=1	V9HW65	HEL-S-270	38578.1	15	21	39	SYSPYDMLESIR	K	K	0.997	69.2	34.6	17.3	69.2	0	3	1	0	2	1476.67	6617.89	42400000	234	245
Mudpit_Aged_L3_4Left_IAF	Annexin OS=Homo sapiens GN=HEL-S-270 PE=2 SV=1	V9HW65	HEL-S-270	38578.1	15	21	39	TDLEKDIISDTSGDFR	K	K	0.997	107	30.2	19.7	107	0	1	1	0	2	1811.87	6001.59	11200000	153	168
Mudpit_Aged_L3_4Left_IAF	Annexin OS=Homo sapiens GN=HEL-S-270 PE=2 SV=1	V9HW65	HEL-S-270	38578.1	15	21	39	TNQELQEINR	R	V	0.997	63.1	25.3	16.9	63.1	0	1	0	0	2	1244.62	1644.88	39200000	136	145
Mudpit_Aged_L3_4Left_IAF	Annexin OS=Homo sapiens GN=HEL-S-270 PE=2 SV=1	V9HW65	HEL-S-270	38578.1	15	21	39	TPAQYDASELK	K	A	0.997	76.1	26.4	17.8	76.1	0	3	0	0	2	1222.6	2033.84	37100000	105	115
Mudpit_Aged_L3_4Left_IAF	Annexin OS=Homo sapiens GN=HEL-S-270 PE=2 SV=1	V9HW65	HEL-S-270	38578.1	15	21	39	WISIMTER	K	S	0.99	36.5	26.8	21	30.7	0	1	0	0	2	1035.53	5296.06	6058980	213	220
Mudpit_Aged_L3_4Left_IAF	Troponin C, skeletal muscle OS=Homo sapiens GN=TNNC2 PE=1 SV=2	P02585	TNNC2	18122.6	3	3	3	IDFDEFLK	R	M	0.99	34.8	26.7	15.2	34.8	0	1	0	0	2	1026.51	7566.81	7323870	147	154
Mudpit_Aged_L3_4Left_IAF	Troponin C, skeletal muscle OS=Homo sapiens GN=TNNC2 PE=1 SV=2	P02585	TNNC2	18122.6	3	3	3	NADGYIDPEELAEIFR	R	A	0.997	68	25.6	17.2	68	0	1	0	0	2	1851.88	9079.79	11600000	106	121
Mudpit_Aged_L3_4Left_IAF	Troponin C, skeletal muscle OS=Homo sapiens GN=TNNC2 PE=1 SV=2	P02585	TNNC2	18122.6	3	3	3	SYLSEEMIAEFK	R	A	0.997	39.6	25	15.5	39.6	0	1	0	0	2	1446.68	7187.66	3605580	10	21
Mudpit_Aged_L3_4Left_IAF	Immunoglobulin kappa light chain OS=Homo sapiens PE=1 SV=1	IGK_HUMAN		0	2	5	26	DIQMTQSPSTLSASVGDR	?	?	0.997	140	25.8	21.8	140	0	9	1	0	2	1892.9	5097.98	55100000	0	0
Mudpit_Aged_L3_4Left_IAF	Immunoglobulin kappa light chain OS=Homo sapiens PE=1 SV=1	IGK_HUMAN		0	2	5	26	GTVAAPSVFIFPPSDEQLK	?	?	0.997	66.9	26.2	17.2	66.9	0	12	4	0	2	2003.05	8054.79	162000000	0	0
Mudpit_Aged_L3_4Left_IAF	cDNA FLJ54228, highly similar to Leucine-rich alpha-2-glycoprotein OS=Homo sapiens PE=2 SV=1	B4E1I8,P02750,Q68CK4	HMFT1766,LRG1	38179.7	7	10	23	ALGHLDLSGNR	K	L	0.996	50	26.9	16.1	50	0	1	2	0	2	1152.61	2133.44	18600000	165	175
Mudpit_Aged_L3_4Left_IAF	cDNA FLJ54228, highly similar to Leucine-rich alpha-2-glycoprotein OS=Homo sapiens PE=2 SV=1	B4E1I8,P02750,Q68CK4	HMFT1766,LRG1	38179.7	7	10	23	DLLLPQPDLR	K	Y	0.967	27.2	25	14.7	27.2	0	1	0	0	2	1179.67	6858.07	3465740	230	239
Mudpit_Aged_L3_4Left_IAF	cDNA FLJ54228, highly similar to Leucine-rich alpha-2-glycoprotein OS=Homo sapiens PE=2 SV=1	B4E1I8,P02750,Q68CK4	HMFT1766,LRG1	38179.7	7	10	23	ENQLEVLEVSWLHGLK	K	A	0.997	111	26.2	19.9	111	0	3	3	0	2	1894.01	8706.41	29700000	149	164
Mudpit_Aged_L3_4Left_IAF	cDNA FLJ54228, highly similar to Leucine-rich alpha-2-glycoprotein OS=Homo sapiens PE=2 SV=1	B4E1I8,P02750,Q68CK4	HMFT1766,LRG1	38179.7	7	10	23	GQTLLAVAK	K	S	0.997	37.6	25	15.4	37.6	0	1	0	0	2	900.551	2516.53	4752270	337	345
Mudpit_Aged_L3_4Left_IAF	cDNA FLJ54228, highly similar to Leucine-rich alpha-2-glycoprotein OS=Homo sapiens PE=2 SV=1	B4E1I8,P02750,Q68CK4	HMFT1766,LRG1	38179.7	7	10	23	LQELHLSSNGLESLSPEFLRPVPQLR	K	V	0.982	42.5	25	15.7	42.5	0	0	1	0	2	2959.6	7925.46	10300000	94	119
Mudpit_Aged_L3_4Left_IAF	cDNA FLJ54228, highly similar to Leucine-rich alpha-2-glycoprotein OS=Homo sapiens PE=2 SV=1	B4E1I8,P02750,Q68CK4	HMFT1766,LRG1	38179.7	7	10	23	TLDLGENQLETLPPDLLR	R	G	0.997	109	26.1	19.8	109	0	4	3	0	2	2037.09	8699.4	29200000	192	209
Mudpit_Aged_L3_4Left_IAF	cDNA FLJ54228, highly similar to Leucine-rich alpha-2-glycoprotein OS=Homo sapiens PE=2 SV=1	B4E1I8,P02750,Q68CK4	HMFT1766,LRG1	38179.7	7	10	23	VAAGAFQGLR	R	Q	0.997	49.1	25.9	16.1	49.1	0	4	0	0	2	989.553	3010.07	30400000	251	260
Mudpit_Aged_L3_4Left_IAF	Apolipoprotein B (Including Ag(X) antigen) OS=Homo sapiens GN=APOB PE=4 SV=1	C0JYY2	APOB	515568	124	180	302	AALTELSLGSAYQAMILGVDSK	K	N	0.997	145	30.4	22.1	145	0	1	2	0	2	2238.17	9040.3	12700000	1703	1724
Mudpit_Aged_L3_4Left_IAF	Apolipoprotein B (Including Ag(X) antigen) OS=Homo sapiens GN=APOB PE=4 SV=1	C0JYY2	APOB	515568	124	180	302	AASGTTGTYQEWK	K	D	0.997	107	25	19.7	107	0	1	0	0	2	1399.65	2008.53	39000000	4133	4145
Mudpit_Aged_L3_4Left_IAF	Apolipoprotein B (Including Ag(X) antigen) OS=Homo sapiens GN=APOB PE=4 SV=1	C0JYY2	APOB	515568	124	180	302	ADSVVDLLSYNVQGSGETTYDHK	K	N	0.997	102	25	19.4	102	0	1	2	0	2	2498.17	6928.85	20200000	1393	1415
Mudpit_Aged_L3_4Left_IAF	Apolipoprotein B (Including Ag(X) antigen) OS=Homo sapiens GN=APOB PE=4 SV=1	C0JYY2	APOB	515568	124	180	302	AEPLAFTFSHDYK	K	G	0.997	67.1	26.9	17.2	67.1	0	1	3	0	2	1525.73	5188.26	41200000	1935	1947
Mudpit_Aged_L3_4Left_IAF	Apolipoprotein B (Including Ag(X) antigen) OS=Homo sapiens GN=APOB PE=4 SV=1	C0JYY2	APOB	515568	124	180	302	AHLDIAGSLEGHLR	K	F	0.985	49	27	16.1	49	0	0	0	1	2	1488.79	4358.69	6198810	3657	3670
Mudpit_Aged_L3_4Left_IAF	Apolipoprotein B (Including Ag(X) antigen) OS=Homo sapiens GN=APOB PE=4 SV=1	C0JYY2	APOB	515568	124	180	302	ALVEQGFTVPEIK	K	T	0.997	73.5	26.5	17.6	73.5	0	3	0	0	2	1430.79	6478.91	17600000	2579	2591
Mudpit_Aged_L3_4Left_IAF	Apolipoprotein B (Including Ag(X) antigen) OS=Homo sapiens GN=APOB PE=4 SV=1	C0JYY2	APOB	515568	124	180	302	ALYWVNGQVPDGVSK	K	V	0.997	61.3	28.1	16.8	61.3	0	1	0	0	2	1632.84	6141.52	8243120	718	732
Mudpit_Aged_L3_4Left_IAF	Apolipoprotein B (Including Ag(X) antigen) OS=Homo sapiens GN=APOB PE=4 SV=1	C0JYY2	APOB	515568	124	180	302	AQNLYQELLTQEGQASFQGLK	K	D	0.997	110	26.3	19.9	110	0	3	0	0	2	2366.2	8409.84	7704470	4148	4168
Mudpit_Aged_L3_4Left_IAF	Apolipoprotein B (Including Ag(X) antigen) OS=Homo sapiens GN=APOB PE=4 SV=1	C0JYY2	APOB	515568	124	180	302	ASGSLPYTQTLQDHLNSLK	K	E	0.997	75.5	26.5	17.7	75.5	0	2	3	0	2	2073.06	6030.88	56200000	1241	1259
Mudpit_Aged_L3_4Left_IAF	Apolipoprotein B (Including Ag(X) antigen) OS=Homo sapiens GN=APOB PE=4 SV=1	C0JYY2	APOB	515568	124	180	302	ATFQTPDFIVPLTDLR	K	I	0.997	89.5	27.5	18.6	89.5	0	2	1	0	2	1833.97	8991.3	327000000	2610	2625
Mudpit_Aged_L3_4Left_IAF	Apolipoprotein B (Including Ag(X) antigen) OS=Homo sapiens GN=APOB PE=4 SV=1	C0JYY2	APOB	515568	124	180	302	AVSMPSFSILGSDVR	K	V	0.997	81.8	26.7	18.1	81.8	0	5	1	0	2	1581.79	7049.39	101000000	3277	3291
Mudpit_Aged_L3_4Left_IAF	Apolipoprotein B (Including Ag(X) antigen) OS=Homo sapiens GN=APOB PE=4 SV=1	C0JYY2	APOB	515568	124	180	302	DAVEKPQEFTIVAFVK	R	Y	0.988	41.1	26.4	15.6	41.1	0	0	1	0	2	1820.98	7017.32	7996160	2044	2059
Mudpit_Aged_L3_4Left_IAF	Apolipoprotein B (Including Ag(X) antigen) OS=Homo sapiens GN=APOB PE=4 SV=1	C0JYY2	APOB	515568	124	180	302	DEPTYILNIK	K	R	0.983	32.3	27.5	15	32.3	0	1	0	0	2	1205.64	6125.11	24000000	148	157
Mudpit_Aged_L3_4Left_IAF	Apolipoprotein B (Including Ag(X) antigen) OS=Homo sapiens GN=APOB PE=4 SV=1	C0JYY2	APOB	515568	124	180	302	DFSAEYEEDGK	R	Y	0.997	47.5	25	16	47.5	0	1	0	0	2	1289.52	2992.74	18700000	3953	3963
Mudpit_Aged_L3_4Left_IAF	Apolipoprotein B (Including Ag(X) antigen) OS=Homo sapiens GN=APOB PE=4 SV=1	C0JYY2	APOB	515568	124	180	302	DKDQEVLLQTFLDDASPGDK	K	R	0.997	67.7	25.7	17.2	67.7	0	1	2	0	2	2234.08	8464.59	22700000	538	557
Mudpit_Aged_L3_4Left_IAF	Apolipoprotein B (Including Ag(X) antigen) OS=Homo sapiens GN=APOB PE=4 SV=1	C0JYY2	APOB	515568	124	180	302	DKDQEVLLQTFLDDASPGDKR	K	L	0.991	59.7	25.9	16.7	59.7	0	0	1	1	2	2390.18	7483.67	4833330	538	558
Mudpit_Aged_L3_4Left_IAF	Apolipoprotein B (Including Ag(X) antigen) OS=Homo sapiens GN=APOB PE=4 SV=1	C0JYY2	APOB	515568	124	180	302	DNVFDGLVR	K	V	0.986	32.7	28.6	15	32.7	0	1	0	0	2	1034.53	6170.12	17100000	4169	4177
Mudpit_Aged_L3_4Left_IAF	Apolipoprotein B (Including Ag(X) antigen) OS=Homo sapiens GN=APOB PE=4 SV=1	C0JYY2	APOB	515568	124	180	302	DQEVLLQTFLDDASPGDKR	K	L	0.997	63.4	26.9	17	63.4	0	0	1	0	2	2147.06	8293.11	8759700	540	558
Mudpit_Aged_L3_4Left_IAF	Apolipoprotein B (Including Ag(X) antigen) OS=Homo sapiens GN=APOB PE=4 SV=1	C0JYY2	APOB	515568	124	180	302	DSYDLHDLK	K	I	0.997	45.8	25	21.9	39.7	0	1	0	0	2	1105.52	2580.34	18200000	2187	2195
Mudpit_Aged_L3_4Left_IAF	Apolipoprotein B (Including Ag(X) antigen) OS=Homo sapiens GN=APOB PE=4 SV=1	C0JYY2	APOB	515568	124	180	302	EEYFDPSIVGWTVK	R	Y	0.997	46.7	26.1	15.9	46.7	0	3	0	0	2	1669.81	8412.73	14200000	4386	4399
Mudpit_Aged_L3_4Left_IAF	Apolipoprotein B (Including Ag(X) antigen) OS=Homo sapiens GN=APOB PE=4 SV=1	C0JYY2	APOB	515568	124	180	302	EFNLQNMGLPDFHIPENLFLK	K	S	0.989	42.9	26.6	15.7	42.9	0	0	1	0	2	2532.26	8988.76	35400000	1260	1280
Mudpit_Aged_L3_4Left_IAF	Apolipoprotein B (Including Ag(X) antigen) OS=Homo sapiens GN=APOB PE=4 SV=1	C0JYY2	APOB	515568	124	180	302	ENFAGEATLQR	K	I	0.997	54.4	26.7	16.4	54.4	0	1	0	0	2	1235.6	2922.62	54000000	3548	3558
Mudpit_Aged_L3_4Left_IAF	Apolipoprotein B (Including Ag(X) antigen) OS=Homo sapiens GN=APOB PE=4 SV=1	C0JYY2	APOB	515568	124	180	302	EQHLFLPFSYK	K	N	0.993	45	26.4	15.8	45	0	0	2	0	2	1408.73	6197.81	17100000	263	273
Mudpit_Aged_L3_4Left_IAF	Apolipoprotein B (Including Ag(X) antigen) OS=Homo sapiens GN=APOB PE=4 SV=1	C0JYY2	APOB	515568	124	180	302	ESQLPTVMDFR	K	K	0.997	42.8	30.3	15.7	42.8	0	1	0	0	2	1338.64	4979.9	10300000	621	631
Mudpit_Aged_L3_4Left_IAF	Apolipoprotein B (Including Ag(X) antigen) OS=Homo sapiens GN=APOB PE=4 SV=1	C0JYY2	APOB	515568	124	180	302	EVGTVLSQVYSK	R	V	0.997	55.3	26.6	16.5	55.3	0	1	0	0	2	1309.7	4804.32	15000000	4223	4234
Mudpit_Aged_L3_4Left_IAF	Apolipoprotein B (Including Ag(X) antigen) OS=Homo sapiens GN=APOB PE=4 SV=1	C0JYY2	APOB	515568	124	180	302	EVYGFNPEGK	K	A	0.984	27	25	14.7	27	0	1	0	0	2	1139.54	3451.05	29500000	101	110
Mudpit_Aged_L3_4Left_IAF	Apolipoprotein B (Including Ag(X) antigen) OS=Homo sapiens GN=APOB PE=4 SV=1	C0JYY2	APOB	515568	124	180	302	EYSGTIASEANTYLNSK	R	S	0.997	98.7	25	19.2	98.7	0	1	1	0	2	1847.87	5597.53	13700000	3508	3524
Mudpit_Aged_L3_4Left_IAF	Apolipoprotein B (Including Ag(X) antigen) OS=Homo sapiens GN=APOB PE=4 SV=1	C0JYY2	APOB	515568	124	180	302	FDHTNSLNIAGLSLDFSSK	K	L	0.997	133	26.7	21.3	133	0	1	1	0	2	2066.02	7716.13	13100000	1751	1769
Mudpit_Aged_L3_4Left_IAF	Apolipoprotein B (Including Ag(X) antigen) OS=Homo sapiens GN=APOB PE=4 SV=1	C0JYY2	APOB	515568	124	180	302	FPEVDVLTK	K	Y	0.997	49.5	27.6	16.1	49.5	0	4	0	0	2	1047.57	5596.76	24100000	3791	3799
Mudpit_Aged_L3_4Left_IAF	Apolipoprotein B (Including Ag(X) antigen) OS=Homo sapiens GN=APOB PE=4 SV=1	C0JYY2	APOB	515568	124	180	302	GFEPTLEALFGK	K	Q	0.997	54.1	26.8	16.4	54.1	0	2	0	0	2	1308.68	8560.27	28200000	696	707
Mudpit_Aged_L3_4Left_IAF	Apolipoprotein B (Including Ag(X) antigen) OS=Homo sapiens GN=APOB PE=4 SV=1	C0JYY2	APOB	515568	124	180	302	GIISALLVPPETEEAK	R	Q	0.995	40.3	25.3	15.5	40.3	0	3	1	0	2	1666.93	7609.62	25700000	159	174
Mudpit_Aged_L3_4Left_IAF	Apolipoprotein B (Including Ag(X) antigen) OS=Homo sapiens GN=APOB PE=4 SV=1	C0JYY2	APOB	515568	124	180	302	GISTSAASPAVGTVGMDMDEDDDFSK	K	W	0.997	137	25	21.6	137	0	3	5	0	2	2603.11	6228.96	21100000	3996	4021
Mudpit_Aged_L3_4Left_IAF	Apolipoprotein B (Including Ag(X) antigen) OS=Homo sapiens GN=APOB PE=4 SV=1	C0JYY2	APOB	515568	124	180	302	GNVATEISTER	K	D	0.997	36.6	26.7	16.7	35.2	0	3	0	0	2	1176.59	1819.7	140000000	197	207
Mudpit_Aged_L3_4Left_IAF	Apolipoprotein B (Including Ag(X) antigen) OS=Homo sapiens GN=APOB PE=4 SV=1	C0JYY2	APOB	515568	124	180	302	HINIDQFVR	K	K	0.965	35.5	26.9	15.2	35.5	0	0	1	0	2	1141.61	4028.7	10200000	2101	2109
Mudpit_Aged_L3_4Left_IAF	Apolipoprotein B (Including Ag(X) antigen) OS=Homo sapiens GN=APOB PE=4 SV=1	C0JYY2	APOB	515568	124	180	302	HIQNIDIQHLAGK	R	L	0.997	64.3	26.5	17	64.3	0	1	1	0	2	1486.81	2851.63	8915190	2272	2284
Mudpit_Aged_L3_4Left_IAF	Apolipoprotein B (Including Ag(X) antigen) OS=Homo sapiens GN=APOB PE=4 SV=1	C0JYY2	APOB	515568	124	180	302	IADFELPTIIVPEQTIEIPSIK	K	F	0.997	57.5	25	16.6	57.5	0	2	2	0	2	2466.37	9126.44	95000000	3847	3868
Mudpit_Aged_L3_4Left_IAF	Apolipoprotein B (Including Ag(X) antigen) OS=Homo sapiens GN=APOB PE=4 SV=1	C0JYY2	APOB	515568	124	180	302	IAELSATAQEIIK	K	S	0.997	73.8	26.7	34.8	56.6	0	3	0	0	2	1386.78	5686.23	29400000	4466	4478
Mudpit_Aged_L3_4Left_IAF	Apolipoprotein B (Including Ag(X) antigen) OS=Homo sapiens GN=APOB PE=4 SV=1	C0JYY2	APOB	515568	124	180	302	IAIANIIDEIIEK	K	L	0.997	90.8	25	18.7	90.8	0	1	0	0	2	1454.85	9124.36	22800000	2196	2208
Mudpit_Aged_L3_4Left_IAF	Apolipoprotein B (Including Ag(X) antigen) OS=Homo sapiens GN=APOB PE=4 SV=1	C0JYY2	APOB	515568	124	180	302	IDDIWNLEVK	K	E	0.997	54	26.8	18	52.4	0	2	0	0	2	1244.65	7013.24	13500000	3538	3547
Mudpit_Aged_L3_4Left_IAF	Apolipoprotein B (Including Ag(X) antigen) OS=Homo sapiens GN=APOB PE=4 SV=1	C0JYY2	APOB	515568	124	180	302	IEFEWNTGTNVDTK	K	K	0.997	111	25	19.9	111	0	2	0	0	2	1653.78	5947.76	14900000	1174	1187
Mudpit_Aged_L3_4Left_IAF	Apolipoprotein B (Including Ag(X) antigen) OS=Homo sapiens GN=APOB PE=4 SV=1	C0JYY2	APOB	515568	124	180	302	IEGNLIFDPNNYLPK	K	E	0.997	56.2	27.1	16.5	56.2	0	4	0	0	2	1746.91	8591.79	30700000	655	669
Mudpit_Aged_L3_4Left_IAF	Apolipoprotein B (Including Ag(X) antigen) OS=Homo sapiens GN=APOB PE=4 SV=1	C0JYY2	APOB	515568	124	180	302	IEIPLPFGGK	K	S	0.997	42.1	25.4	15.6	42.1	0	2	0	0	2	1070.62	7398.6	19900000	1296	1305
Mudpit_Aged_L3_4Left_IAF	Apolipoprotein B (Including Ag(X) antigen) OS=Homo sapiens GN=APOB PE=4 SV=1	C0JYY2	APOB	515568	124	180	302	IGQDGISTSATTNLK	R	C	0.997	95.9	28.8	19	95.9	0	4	0	0	2	1505.78	3097.94	14300000	1647	1661
Mudpit_Aged_L3_4Left_IAF	Apolipoprotein B (Including Ag(X) antigen) OS=Homo sapiens GN=APOB PE=4 SV=1	C0JYY2	APOB	515568	124	180	302	IHSGSFQSQVELSNDQEK	R	A	0.997	79.6	25	18	79.6	0	1	2	0	2	2032.96	2428.51	18900000	3639	3656
Mudpit_Aged_L3_4Left_IAF	Apolipoprotein B (Including Ag(X) antigen) OS=Homo sapiens GN=APOB PE=4 SV=1	C0JYY2	APOB	515568	124	180	302	IISDYHQQFR	K	Y	0.997	41.5	26.4	15.6	41.5	0	1	2	0	2	1306.65	1945.73	16700000	4487	4496
Mudpit_Aged_L3_4Left_IAF	Apolipoprotein B (Including Ag(X) antigen) OS=Homo sapiens GN=APOB PE=4 SV=1	C0JYY2	APOB	515568	124	180	302	ILGEELGFASLHDLQLLGK	R	L	0.997	110	25	19.8	110	0	1	2	0	2	2053.13	8909.28	113000000	779	797
Mudpit_Aged_L3_4Left_IAF	Apolipoprotein B (Including Ag(X) antigen) OS=Homo sapiens GN=APOB PE=4 SV=1	C0JYY2	APOB	515568	124	180	302	INDVLEHVK	R	H	0.997	53.3	25.8	16.3	53.3	0	2	0	0	2	1066.59	1781.92	25100000	2310	2318
Mudpit_Aged_L3_4Left_IAF	Apolipoprotein B (Including Ag(X) antigen) OS=Homo sapiens GN=APOB PE=4 SV=1	C0JYY2	APOB	515568	124	180	302	INNQLTLDSNTK	K	Y	0.997	50.2	27.9	16.1	50.2	0	2	0	0	2	1360.71	2289.74	9324310	2877	2888
Mudpit_Aged_L3_4Left_IAF	Apolipoprotein B (Including Ag(X) antigen) OS=Homo sapiens GN=APOB PE=4 SV=1	C0JYY2	APOB	515568	124	180	302	IPSVQINFK	R	D	0.997	51	25.5	16.2	51	0	2	0	0	2	1045.6	5251.27	36300000	2626	2634
Mudpit_Aged_L3_4Left_IAF	Apolipoprotein B (Including Ag(X) antigen) OS=Homo sapiens GN=APOB PE=4 SV=1	C0JYY2	APOB	515568	124	180	302	ITENDIQIALDDAK	R	I	0.997	116	27.3	20.3	116	0	2	1	0	2	1558.8	6490.19	24500000	2151	2164
Mudpit_Aged_L3_4Left_IAF	Apolipoprotein B (Including Ag(X) antigen) OS=Homo sapiens GN=APOB PE=4 SV=1	C0JYY2	APOB	515568	124	180	302	IVQILPWEQNEQVK	K	N	0.997	65.9	26.8	17.1	65.9	0	3	0	0	2	1723.94	6768	78000000	577	590
Mudpit_Aged_L3_4Left_IAF	Apolipoprotein B (Including Ag(X) antigen) OS=Homo sapiens GN=APOB PE=4 SV=1	C0JYY2	APOB	515568	124	180	302	IYSLWEHSTK	R	N	0.993	42.9	26.8	15.7	42.9	0	1	2	0	2	1263.64	3215.3	29000000	3559	3568
Mudpit_Aged_L3_4Left_IAF	Apolipoprotein B (Including Ag(X) antigen) OS=Homo sapiens GN=APOB PE=4 SV=1	C0JYY2	APOB	515568	124	180	302	LALWGEHTGQLYSK	K	F	0.997	62	26.6	16.9	62	0	2	1	0	2	1602.83	4936.16	31100000	1917	1930
Mudpit_Aged_L3_4Left_IAF	Apolipoprotein B (Including Ag(X) antigen) OS=Homo sapiens GN=APOB PE=4 SV=1	C0JYY2	APOB	515568	124	180	302	LATALSLSNK	K	F	0.997	35.6	25.9	15.2	35.6	0	1	0	0	2	1017.59	3038.37	13000000	3395	3404
Mudpit_Aged_L3_4Left_IAF	Apolipoprotein B (Including Ag(X) antigen) OS=Homo sapiens GN=APOB PE=4 SV=1	C0JYY2	APOB	515568	124	180	302	LDFSSQADLR	K	N	0.997	77.8	26.4	26.8	68.8	0	1	0	0	2	1151.57	4383.67	105000000	2898	2907
Mudpit_Aged_L3_4Left_IAF	Apolipoprotein B (Including Ag(X) antigen) OS=Homo sapiens GN=APOB PE=4 SV=1	C0JYY2	APOB	515568	124	180	302	LDVTTSIGR	K	R	0.963	27	27.5	14.7	27	0	1	0	0	2	961.531	3183.87	6728770	3690	3698
Mudpit_Aged_L3_4Left_IAF	Apolipoprotein B (Including Ag(X) antigen) OS=Homo sapiens GN=APOB PE=4 SV=1	C0JYY2	APOB	515568	124	180	302	LEIQSQVDSQHVGHSVLTAK	K	G	0.997	58.8	27	16.7	58.8	0	0	1	2	2	2176.14	3572.04	19400000	2986	3005
Mudpit_Aged_L3_4Left_IAF	Apolipoprotein B (Including Ag(X) antigen) OS=Homo sapiens GN=APOB PE=4 SV=1	C0JYY2	APOB	515568	124	180	302	LEVLNFDFQANAQLSNPK	K	I	0.997	116	26.4	20.3	116	0	1	0	0	2	2048.04	8083.04	1741420	2801	2818
Mudpit_Aged_L3_4Left_IAF	Apolipoprotein B (Including Ag(X) antigen) OS=Homo sapiens GN=APOB PE=4 SV=1	C0JYY2	APOB	515568	124	180	302	LIDVISMYR	K	E	0.997	41.1	25	15.9	40.7	0	5	0	0	2	1125.6	5455.25	47100000	4262	4270
Mudpit_Aged_L3_4Left_IAF	Apolipoprotein B (Including Ag(X) antigen) OS=Homo sapiens GN=APOB PE=4 SV=1	C0JYY2	APOB	515568	124	180	302	LLLQMDSSATAYGSTVSK	K	R	0.997	107	25.9	19.7	107	0	3	0	0	2	1887.94	4843.7	6527420	1146	1163
Mudpit_Aged_L3_4Left_IAF	Apolipoprotein B (Including Ag(X) antigen) OS=Homo sapiens GN=APOB PE=4 SV=1	C0JYY2	APOB	515568	124	180	302	LLSGGNTLHLVSTTK	K	T	0.997	108	25	19.7	108	0	1	2	0	2	1540.87	3710	19100000	935	949
Mudpit_Aged_L3_4Left_IAF	Apolipoprotein B (Including Ag(X) antigen) OS=Homo sapiens GN=APOB PE=4 SV=1	C0JYY2	APOB	515568	124	180	302	LNGEIQALELPQK	R	A	0.997	85.3	25	18.3	85.3	0	2	0	0	2	1452.81	5484.87	24800000	2450	2462
Mudpit_Aged_L3_4Left_IAF	Apolipoprotein B (Including Ag(X) antigen) OS=Homo sapiens GN=APOB PE=4 SV=1	C0JYY2	APOB	515568	124	180	302	LNTDIAGLASAIDMSTNYNSDSLHFSNVFR	R	S	0.997	72.8	25	17.5	72.8	0	0	1	0	2	3289.54	8943.64	34300000	1868	1897
Mudpit_Aged_L3_4Left_IAF	Apolipoprotein B (Including Ag(X) antigen) OS=Homo sapiens GN=APOB PE=4 SV=1	C0JYY2	APOB	515568	124	180	302	LPQQANDYLNSFNWER	K	Q	0.997	102	25	19.4	102	0	2	2	0	2	1994.94	7406.2	18600000	2118	2133
Mudpit_Aged_L3_4Left_IAF	Apolipoprotein B (Including Ag(X) antigen) OS=Homo sapiens GN=APOB PE=4 SV=1	C0JYY2	APOB	515568	124	180	302	LPYTIITTPPLK	R	D	0.997	61	25	16.8	61	0	1	0	0	2	1356.81	6732.16	21700000	3137	3148
Mudpit_Aged_L3_4Left_IAF	Apolipoprotein B (Including Ag(X) antigen) OS=Homo sapiens GN=APOB PE=4 SV=1	C0JYY2	APOB	515568	124	180	302	LQDFSDQLSDYYEK	K	F	0.997	81.4	25	18.1	81.4	0	2	0	0	2	1750.78	6375.14	13100000	4499	4512
Mudpit_Aged_L3_4Left_IAF	Apolipoprotein B (Including Ag(X) antigen) OS=Homo sapiens GN=APOB PE=4 SV=1	C0JYY2	APOB	515568	124	180	302	LSLESLTSYFSIESSTK	K	G	0.997	133	26.9	21.3	133	0	1	0	0	2	1891.95	9007.6	23400000	3481	3497
Mudpit_Aged_L3_4Left_IAF	Apolipoprotein B (Including Ag(X) antigen) OS=Homo sapiens GN=APOB PE=4 SV=1	C0JYY2	APOB	515568	124	180	302	LSNDMMGSYAEMK	K	F	0.997	67.7	25	17.2	15.7	0	3	0	0	2	1508.61	2041.21	11700000	1738	1750
Mudpit_Aged_L3_4Left_IAF	Apolipoprotein B (Including Ag(X) antigen) OS=Homo sapiens GN=APOB PE=4 SV=1	C0JYY2	APOB	515568	124	180	302	LSNVLQQVK	K	I	0.997	53	26.2	23.8	45.5	0	2	0	0	2	1028.61	2801.1	48700000	2377	2385
Mudpit_Aged_L3_4Left_IAF	Apolipoprotein B (Including Ag(X) antigen) OS=Homo sapiens GN=APOB PE=4 SV=1	C0JYY2	APOB	515568	124	180	302	LSQLQTYMIQFDQYIK	K	D	0.997	47	26.9	15.9	47	0	2	0	0	2	2035.02	8067.9	4954060	2171	2186
Mudpit_Aged_L3_4Left_IAF	Apolipoprotein B (Including Ag(X) antigen) OS=Homo sapiens GN=APOB PE=4 SV=1	C0JYY2	APOB	515568	124	180	302	LTISEQNIQR	K	A	0.997	71.2	27.2	29.3	59.4	0	2	0	0	2	1201.65	2695.51	10800000	335	344
Mudpit_Aged_L3_4Left_IAF	Apolipoprotein B (Including Ag(X) antigen) OS=Homo sapiens GN=APOB PE=4 SV=1	C0JYY2	APOB	515568	124	180	302	LVELAHQYK	K	L	0.997	52.6	26.3	20.3	48.6	0	1	0	0	2	1100.61	1523.63	4477700	2361	2369
Mudpit_Aged_L3_4Left_IAF	Apolipoprotein B (Including Ag(X) antigen) OS=Homo sapiens GN=APOB PE=4 SV=1	C0JYY2	APOB	515568	124	180	302	LVGFIDDAVK	K	K	0.997	70.6	26.6	20.8	67.2	0	2	0	0	2	1076.6	5600.85	7775680	2393	2402
Mudpit_Aged_L3_4Left_IAF	Apolipoprotein B (Including Ag(X) antigen) OS=Homo sapiens GN=APOB PE=4 SV=1	C0JYY2	APOB	515568	124	180	302	LVGFIDDAVKK	K	L	0.987	41.5	25.7	15.6	41.5	0	0	1	0	2	1204.69	4148.41	4695220	2393	2403
Mudpit_Aged_L3_4Left_IAF	Apolipoprotein B (Including Ag(X) antigen) OS=Homo sapiens GN=APOB PE=4 SV=1	C0JYY2	APOB	515568	124	180	302	MTSNFPVDLSDYPK	K	S	0.997	110	25.1	19.9	110	0	2	0	0	2	1613.75	6401.67	8097980	1189	1202
Mudpit_Aged_L3_4Left_IAF	Apolipoprotein B (Including Ag(X) antigen) OS=Homo sapiens GN=APOB PE=4 SV=1	C0JYY2	APOB	515568	124	180	302	MYQMDIQQELQR	R	Y	0.997	86.3	25	18.4	86.3	0	4	0	0	2	1614.73	3904.26	18300000	2523	2534
Mudpit_Aged_L3_4Left_IAF	Apolipoprotein B (Including Ag(X) antigen) OS=Homo sapiens GN=APOB PE=4 SV=1	C0JYY2	APOB	515568	124	180	302	NFVASHIANILNSEELDIQDLKK	K	L	0.997	78.9	25.5	17.9	78.9	0	0	1	1	2	2611.37	7775.24	11900000	591	613
Mudpit_Aged_L3_4Left_IAF	Apolipoprotein B (Including Ag(X) antigen) OS=Homo sapiens GN=APOB PE=4 SV=1	C0JYY2	APOB	515568	124	180	302	NHLQLEGLFFTNGEHTSK	K	A	0.997	60.9	27.6	16.8	60.9	0	0	1	0	2	2072.02	5352.79	5538760	3569	3586
Mudpit_Aged_L3_4Left_IAF	Apolipoprotein B (Including Ag(X) antigen) OS=Homo sapiens GN=APOB PE=4 SV=1	C0JYY2	APOB	515568	124	180	302	NIILPVYDK	K	S	0.991	29.4	25.3	17.6	26.7	0	2	0	0	2	1074.62	5336.74	19500000	3674	3682
Mudpit_Aged_L3_4Left_IAF	Apolipoprotein B (Including Ag(X) antigen) OS=Homo sapiens GN=APOB PE=4 SV=1	C0JYY2	APOB	515568	124	180	302	NIQEYLSILTDPDGK	R	G	0.997	90.4	25.8	18.6	90.4	0	2	1	0	2	1705.86	8934.15	65900000	4447	4461
Mudpit_Aged_L3_4Left_IAF	Apolipoprotein B (Including Ag(X) antigen) OS=Homo sapiens GN=APOB PE=4 SV=1	C0JYY2	APOB	515568	124	180	302	NLQNNAEWVYQGAIR	R	Q	0.997	88.6	27.6	18.5	88.6	0	1	0	0	2	1775.88	5957.16	17400000	4107	4121
Mudpit_Aged_L3_4Left_IAF	Apolipoprotein B (Including Ag(X) antigen) OS=Homo sapiens GN=APOB PE=4 SV=1	C0JYY2	APOB	515568	124	180	302	NLTDFAEQYSIQDWAK	K	R	0.997	124	25.1	20.7	124	0	3	2	0	2	1928.9	8442.11	20700000	2560	2575
Mudpit_Aged_L3_4Left_IAF	Apolipoprotein B (Including Ag(X) antigen) OS=Homo sapiens GN=APOB PE=4 SV=1	C0JYY2	APOB	515568	124	180	302	NMEVSVATTTK	K	A	0.997	38.4	25.1	15.4	38.4	0	2	0	0	2	1180.59	1936.15	27000000	3420	3430
Mudpit_Aged_L3_4Left_IAF	Apolipoprotein B (Including Ag(X) antigen) OS=Homo sapiens GN=APOB PE=4 SV=1	C0JYY2	APOB	515568	124	180	302	NNALDFVTK	R	S	0.997	45.3	28	15.8	45.3	0	2	0	0	2	1021.53	4303.44	23400000	3213	3221
Mudpit_Aged_L3_4Left_IAF	Apolipoprotein B (Including Ag(X) antigen) OS=Homo sapiens GN=APOB PE=4 SV=1	C0JYY2	APOB	515568	124	180	302	NSEEFAAAMSR	K	Y	0.997	64.3	25	17	64.3	0	1	0	0	2	1212.53	2819.32	12100000	118	128
Mudpit_Aged_L3_4Left_IAF	Apolipoprotein B (Including Ag(X) antigen) OS=Homo sapiens GN=APOB PE=4 SV=1	C0JYY2	APOB	515568	124	180	302	NSLFFSAQPFEITASTNNEGNLK	K	V	0.997	105	26.1	19.6	105	0	2	3	0	2	2529.23	8383.21	19500000	3035	3057
Mudpit_Aged_L3_4Left_IAF	Apolipoprotein B (Including Ag(X) antigen) OS=Homo sapiens GN=APOB PE=4 SV=1	C0JYY2	APOB	515568	124	180	302	NTLELSNGVIVK	K	I	0.997	40.8	25.3	15.5	40.8	0	1	0	0	2	1286.73	4779.1	4725640	2865	2876
Mudpit_Aged_L3_4Left_IAF	Apolipoprotein B (Including Ag(X) antigen) OS=Homo sapiens GN=APOB PE=4 SV=1	C0JYY2	APOB	515568	124	180	302	QIDDIDVR	R	F	0.99	36.1	28.8	15.3	36.1	0	2	0	0	2	973.495	2514	29300000	4122	4129
Mudpit_Aged_L3_4Left_IAF	Apolipoprotein B (Including Ag(X) antigen) OS=Homo sapiens GN=APOB PE=4 SV=1	C0JYY2	APOB	515568	124	180	302	QTIIVVLENVQR	R	N	0.997	78.1	25	17.9	78.1	0	2	0	0	2	1411.83	6610.78	16200000	2086	2097
Mudpit_Aged_L3_4Left_IAF	Apolipoprotein B (Including Ag(X) antigen) OS=Homo sapiens GN=APOB PE=4 SV=1	C0JYY2	APOB	515568	124	180	302	QVFLYPEK	K	D	0.98	28.9	27.4	14.8	28.9	0	1	0	0	2	1023.55	4006.15	6251610	140	147
Mudpit_Aged_L3_4Left_IAF	Apolipoprotein B (Including Ag(X) antigen) OS=Homo sapiens GN=APOB PE=4 SV=1	C0JYY2	APOB	515568	124	180	302	SEILAHWSPAK	R	L	0.997	78.5	26.2	17.9	78.5	0	1	2	0	2	1238.65	3165.95	31600000	1135	1145
Mudpit_Aged_L3_4Left_IAF	Apolipoprotein B (Including Ag(X) antigen) OS=Homo sapiens GN=APOB PE=4 SV=1	C0JYY2	APOB	515568	124	180	302	SEYQADYESLR	R	F	0.997	53.8	25	16.4	53.8	0	1	0	0	2	1360.6	3287.35	13300000	1600	1610
Mudpit_Aged_L3_4Left_IAF	Apolipoprotein B (Including Ag(X) antigen) OS=Homo sapiens GN=APOB PE=4 SV=1	C0JYY2	APOB	515568	124	180	302	SFDYHQFVDETNDK	K	I	0.997	85.7	25	18.4	85.7	0	2	2	0	2	1744.75	5201.34	28600000	2429	2442
Mudpit_Aged_L3_4Left_IAF	Apolipoprotein B (Including Ag(X) antigen) OS=Homo sapiens GN=APOB PE=4 SV=1	C0JYY2	APOB	515568	124	180	302	SGSSTASWIQNVDTK	K	Y	0.997	110	25.4	19.9	110	0	2	0	0	2	1580.76	4393.43	8242640	2241	2255
Mudpit_Aged_L3_4Left_IAF	Apolipoprotein B (Including Ag(X) antigen) OS=Homo sapiens GN=APOB PE=4 SV=1	C0JYY2	APOB	515568	124	180	302	SGVQMNTNFFHESGLEAHVALK	R	A	0.988	42.7	26.1	15.7	42.7	0	0	1	3	2	2432.17	5094.25	18400000	897	918
Mudpit_Aged_L3_4Left_IAF	Apolipoprotein B (Including Ag(X) antigen) OS=Homo sapiens GN=APOB PE=4 SV=1	C0JYY2	APOB	515568	124	180	302	SPAFTDLHLR	K	Y	0.997	63.4	25.6	17	63.4	0	0	1	0	2	1156.61	4126.49	9072390	3980	3989
Mudpit_Aged_L3_4Left_IAF	Apolipoprotein B (Including Ag(X) antigen) OS=Homo sapiens GN=APOB PE=4 SV=1	C0JYY2	APOB	515568	124	180	302	SVSDGIAALDLNAVANK	K	I	0.997	91.2	32.1	18.7	91.2	0	2	0	0	2	1657.88	6789.41	11400000	3830	3846
Mudpit_Aged_L3_4Left_IAF	Apolipoprotein B (Including Ag(X) antigen) OS=Homo sapiens GN=APOB PE=4 SV=1	C0JYY2	APOB	515568	124	180	302	SVSLPSLDPASAK	K	I	0.997	42	26	15.6	42	0	2	0	0	2	1271.68	5196.17	12300000	642	654
Mudpit_Aged_L3_4Left_IAF	Apolipoprotein B (Including Ag(X) antigen) OS=Homo sapiens GN=APOB PE=4 SV=1	C0JYY2	APOB	515568	124	180	302	TEHGSEMLFFGNAIEGK	R	S	0.997	52.7	25	16.3	52.7	0	0	3	0	2	1866.87	5134.19	28700000	2837	2853
Mudpit_Aged_L3_4Left_IAF	Apolipoprotein B (Including Ag(X) antigen) OS=Homo sapiens GN=APOB PE=4 SV=1	C0JYY2	APOB	515568	124	180	302	TEVIPPLIENR	K	Q	0.997	52.3	25	17.2	51.3	0	1	1	0	2	1280.72	5636.51	64900000	950	960
Mudpit_Aged_L3_4Left_IAF	Apolipoprotein B (Including Ag(X) antigen) OS=Homo sapiens GN=APOB PE=4 SV=1	C0JYY2	APOB	515568	124	180	302	TGISPLALIK	R	G	0.997	47.8	25	16	47.8	0	1	0	0	2	1012.64	6334.77	17000000	220	229
Mudpit_Aged_L3_4Left_IAF	Apolipoprotein B (Including Ag(X) antigen) OS=Homo sapiens GN=APOB PE=4 SV=1	C0JYY2	APOB	515568	124	180	302	TIDQMLNSELQWPVPDIYLR	R	D	0.997	121	27.3	20.6	121	0	2	1	0	2	2447.23	9035.38	16300000	2675	2694
Mudpit_Aged_L3_4Left_IAF	Apolipoprotein B (Including Ag(X) antigen) OS=Homo sapiens GN=APOB PE=4 SV=1	C0JYY2	APOB	515568	124	180	302	TIHDLHLFIENIDFNK	K	S	0.982	43.8	27.7	15.7	43.8	0	0	0	1	2	1969.02	7127.07	7784550	2225	2240
Mudpit_Aged_L3_4Left_IAF	Apolipoprotein B (Including Ag(X) antigen) OS=Homo sapiens GN=APOB PE=4 SV=1	C0JYY2	APOB	515568	124	180	302	TLADLTLLDSPIK	R	V	0.997	92.3	26.2	18.8	92.3	0	4	0	0	2	1399.8	8033.13	29300000	2013	2025
Mudpit_Aged_L3_4Left_IAF	Apolipoprotein B (Including Ag(X) antigen) OS=Homo sapiens GN=APOB PE=4 SV=1	C0JYY2	APOB	515568	124	180	302	TLQGIPQMIGEVIR	R	K	0.997	41.8	25.7	15.6	41.8	0	3	0	0	2	1570.86	6741.08	16500000	805	818
Mudpit_Aged_L3_4Left_IAF	Apolipoprotein B (Including Ag(X) antigen) OS=Homo sapiens GN=APOB PE=4 SV=1	C0JYY2	APOB	515568	124	180	302	TQFNNNEYSQDLDAYNTK	K	D	0.997	115	25	20.2	115	0	2	2	0	2	2164.94	4793.69	29800000	1985	2002
Mudpit_Aged_L3_4Left_IAF	Apolipoprotein B (Including Ag(X) antigen) OS=Homo sapiens GN=APOB PE=4 SV=1	C0JYY2	APOB	515568	124	180	302	TSSFALNLPTLPEVK	R	F	0.997	70.9	26.7	17.4	70.9	0	2	0	0	2	1616.89	8101.38	9993550	3776	3790
Mudpit_Aged_L3_4Left_IAF	Apolipoprotein B (Including Ag(X) antigen) OS=Homo sapiens GN=APOB PE=4 SV=1	C0JYY2	APOB	515568	124	180	302	VEDIPLAR	K	I	0.99	34.6	25	23.5	26.3	0	2	0	0	2	912.515	2983.12	11700000	2698	2705
Mudpit_Aged_L3_4Left_IAF	Apolipoprotein B (Including Ag(X) antigen) OS=Homo sapiens GN=APOB PE=4 SV=1	C0JYY2	APOB	515568	124	180	302	VIGNMGQTMEQLTPELK	R	S	0.997	100	29	19.3	100	0	5	2	0	2	1888.95	5538.23	29800000	491	507
Mudpit_Aged_L3_4Left_IAF	Apolipoprotein B (Including Ag(X) antigen) OS=Homo sapiens GN=APOB PE=4 SV=1	C0JYY2	APOB	515568	124	180	302	VLLDQLGTTISFER	R	I	0.997	92.8	25	18.8	92.8	0	3	1	0	2	1591.87	7874.94	37600000	2296	2309
Mudpit_Aged_L3_4Left_IAF	Apolipoprotein B (Including Ag(X) antigen) OS=Homo sapiens GN=APOB PE=4 SV=1	C0JYY2	APOB	515568	124	180	302	VLVDHFGYTK	K	D	0.997	61.2	26.7	16.8	61.2	0	3	3	0	2	1178.62	2936.28	42200000	733	742
Mudpit_Aged_L3_4Left_IAF	Apolipoprotein B (Including Ag(X) antigen) OS=Homo sapiens GN=APOB PE=4 SV=1	C0JYY2	APOB	515568	124	180	302	VNQNLVYESGSLNFSK	R	L	0.997	93.6	26.5	18.9	93.6	0	2	0	0	2	1798.9	5615.99	9600080	2970	2985
Mudpit_Aged_L3_4Left_IAF	Apolipoprotein B (Including Ag(X) antigen) OS=Homo sapiens GN=APOB PE=4 SV=1	C0JYY2	APOB	515568	124	180	302	VNWEEEAASGLLTSLK	K	D	0.997	99.9	27	19.2	99.9	0	4	2	0	2	1746.89	8699.54	54300000	4056	4071
Mudpit_Aged_L3_4Left_IAF	Apolipoprotein B (Including Ag(X) antigen) OS=Homo sapiens GN=APOB PE=4 SV=1	C0JYY2	APOB	515568	124	180	302	VPLLLSEPINIIDALEMR	K	D	0.997	69.4	25	17.3	69.4	0	2	2	0	2	2052.14	9256.34	29200000	2026	2043
Mudpit_Aged_L3_4Left_IAF	Apolipoprotein B (Including Ag(X) antigen) OS=Homo sapiens GN=APOB PE=4 SV=1	C0JYY2	APOB	515568	124	180	302	VSALLTPAEQTGTWK	K	L	0.997	67.1	27.6	17.2	67.1	0	2	0	0	2	1601.85	5423.81	16400000	1968	1982
Mudpit_Aged_L3_4Left_IAF	Apolipoprotein B (Including Ag(X) antigen) OS=Homo sapiens GN=APOB PE=4 SV=1	C0JYY2	APOB	515568	124	180	302	VSTAFVYTK	R	N	0.997	42.8	27.2	21	37.5	0	1	0	0	2	1015.55	2855.07	13200000	3704	3712
Mudpit_Aged_L3_4Left_IAF	Apolipoprotein B (Including Ag(X) antigen) OS=Homo sapiens GN=APOB PE=4 SV=1	C0JYY2	APOB	515568	124	180	302	WNFYYSPQSSPDK	K	K	0.997	50.1	25	16.1	50.1	0	1	0	0	2	1618.72	5769.07	5452590	4022	4034
Mudpit_Aged_L3_4Left_IAF	Apolipoprotein B (Including Ag(X) antigen) OS=Homo sapiens GN=APOB PE=4 SV=1	C0JYY2	APOB	515568	124	180	302	YEDGTLSLTSTSDLQSGIIK	R	N	0.997	136	26.6	21.5	136	0	2	0	0	2	2128.07	7035.58	14600000	1537	1556
Mudpit_Aged_L3_4Left_IAF	Apolipoprotein B (Including Ag(X) antigen) OS=Homo sapiens GN=APOB PE=4 SV=1	C0JYY2	APOB	515568	124	180	302	YEGLQEWEGK	K	A	0.997	51.2	25	16.2	51.2	0	2	0	0	2	1238.57	4283.61	15600000	3964	3973
Mudpit_Aged_L3_4Left_IAF	Apolipoprotein B (Including Ag(X) antigen) OS=Homo sapiens GN=APOB PE=4 SV=1	C0JYY2	APOB	515568	124	180	302	YENYELTLK	K	S	0.997	43	25	15.7	43	0	1	0	0	2	1172.58	4264.19	11400000	1563	1571
Mudpit_Aged_L3_4Left_IAF	Apolipoprotein B (Including Ag(X) antigen) OS=Homo sapiens GN=APOB PE=4 SV=1	C0JYY2	APOB	515568	124	180	302	YEVDQQIQVLMDK	R	L	0.997	96.3	25	19	96.3	0	3	0	0	2	1624.79	5437.46	39400000	2348	2360
Mudpit_Aged_L3_4Left_IAF	Apolipoprotein B (Including Ag(X) antigen) OS=Homo sapiens GN=APOB PE=4 SV=1	C0JYY2	APOB	515568	124	180	302	YGMVAQVTQTLK	K	L	0.997	69.2	26.2	17.3	69.2	0	3	0	0	2	1338.71	3332.33	15900000	276	287
Mudpit_Aged_L3_4Left_IAF	Apolipoprotein B (Including Ag(X) antigen) OS=Homo sapiens GN=APOB PE=4 SV=1	C0JYY2	APOB	515568	124	180	302	YHWEHTGLTLR	K	E	0.986	38.4	25.9	15.4	38.4	0	0	2	0	2	1412.71	2980.86	23500000	4088	4098
Mudpit_Aged_L3_4Left_IAF	Apolipoprotein B (Including Ag(X) antigen) OS=Homo sapiens GN=APOB PE=4 SV=1	C0JYY2	APOB	515568	124	180	302	YTYNYEAESSSGVPGTADSR	K	S	0.997	129	25	21.1	129	0	2	1	0	2	2153.93	4172.18	26400000	52	71
Mudpit_Aged_L3_4Left_IAF	Angiotensinogen variant (Fragment) OS=Homo sapiens PE=2 SV=1	Q53GY3,Q53YY1,Q59EP2,Q86U78	AGT	53124.7	5	5	12	ALQDQLVLVAAK	K	L	0.997	64.1	25	17	64.1	0	3	0	0	2	1268.76	5862.39	47000000	83	94
Mudpit_Aged_L3_4Left_IAF	Angiotensinogen variant (Fragment) OS=Homo sapiens PE=2 SV=1	Q53GY3,Q53YY1,Q59EP2,Q86U78	AGT	53124.7	5	5	12	DPTFIPAPIQAK	K	T	0.997	55.1	25	16.4	55.1	0	2	0	0	2	1297.72	6133.9	17600000	64	75
Mudpit_Aged_L3_4Left_IAF	Angiotensinogen variant (Fragment) OS=Homo sapiens PE=2 SV=1	Q53GY3,Q53YY1,Q59EP2,Q86U78	AGT	53124.7	5	5	12	FMQAVTGWK	R	T	0.997	47.6	26.9	16	47.6	0	1	0	0	2	1083.53	2997.15	3697290	254	262
Mudpit_Aged_L3_4Left_IAF	Angiotensinogen variant (Fragment) OS=Homo sapiens PE=2 SV=1	Q53GY3,Q53YY1,Q59EP2,Q86U78	AGT	53124.7	5	5	12	SLDFTELDVAAEK	R	I	0.997	85.9	30.2	18.4	85.9	0	5	0	0	2	1437.71	6788.21	26000000	238	250
Mudpit_Aged_L3_4Left_IAF	Angiotensinogen variant (Fragment) OS=Homo sapiens PE=2 SV=1	Q53GY3,Q53YY1,Q59EP2,Q86U78	AGT	53124.7	5	5	12	TGCSLTGASVDSTLAFNTYVHFQGK	K	M	0.982	61.4	27.2	16.8	61.4	0	0	1	0	2	2662.25	7301.92	1912830	263	287
Mudpit_Aged_L3_4Left_IAF	Platelet-activating factor acetylhydrolase IB subunit beta OS=Homo sapiens GN=PAFAH1B2 PE=1 SV=1	P68402,V9HW44	HEL-S-303,PAFAH1B2	25569.5	2	2	2	ELFSPLHALNFGIGGDTTR	R	H	0.997	62.1	27.3	16.9	62.1	0	0	1	0	2	2045.05	8216.41	4856650	61	79
Mudpit_Aged_L3_4Left_IAF	Platelet-activating factor acetylhydrolase IB subunit beta OS=Homo sapiens GN=PAFAH1B2 PE=1 SV=1	P68402,V9HW44	HEL-S-303,PAFAH1B2	25569.5	2	2	2	IIVLGLLPR	K	G	0.997	37.5	25	15.3	37.5	0	1	0	0	2	993.682	7395.93	4779080	134	142
Mudpit_Aged_L3_4Left_IAF	Heat shock protein beta-1 OS=Homo sapiens GN=HSPB1 PE=1 SV=2	P04792,V9HW43	HEL-S-102,HSPB1	22782.6	2	3	3	DGVVEITGK	K	H	0.997	54	26.3	16.4	54	0	1	0	0	2	917.494	2411.13	4234140	115	123
Mudpit_Aged_L3_4Left_IAF	Heat shock protein beta-1 OS=Homo sapiens GN=HSPB1 PE=1 SV=2	P04792,V9HW43	HEL-S-102,HSPB1	22782.6	2	3	3	VSLDVNHFAPDELTVK	R	T	0.997	76.4	26.8	17.8	76.4	0	1	1	0	2	1783.92	6167.87	77300000	97	112
Mudpit_Aged_L3_4Left_IAF	ATP synthase subunit beta, mitochondrial OS=Homo sapiens GN=ATP5B PE=1 SV=3	P06576,V9HW31	ATP5B,HEL-S-271	56560.6	7	8	9	AIAELGIYPAVDPLDSTSR	R	I	0.997	75.6	26.7	17.7	75.6	0	1	1	0	2	1988.03	8210.08	29100000	388	406
Mudpit_Aged_L3_4Left_IAF	ATP synthase subunit beta, mitochondrial OS=Homo sapiens GN=ATP5B PE=1 SV=3	P06576,V9HW31	ATP5B,HEL-S-271	56560.6	7	8	9	EGNDLYHEMIESGVINLK	R	D	0.994	51.6	30.5	16.2	51.6	0	0	1	0	2	2061	7732.7	9210460	242	259
Mudpit_Aged_L3_4Left_IAF	ATP synthase subunit beta, mitochondrial OS=Homo sapiens GN=ATP5B PE=1 SV=3	P06576,V9HW31	ATP5B,HEL-S-271	56560.6	7	8	9	FLSQPFQVAEVFTGHMGK	R	L	0.997	76.3	26.3	17.8	76.3	0	0	1	0	2	2023.01	8043.53	7642840	463	480
Mudpit_Aged_L3_4Left_IAF	ATP synthase subunit beta, mitochondrial OS=Homo sapiens GN=ATP5B PE=1 SV=3	P06576,V9HW31	ATP5B,HEL-S-271	56560.6	7	8	9	IMDPNIVGSEHYDVAR	R	G	0.997	54	25	17.1	53.3	0	0	1	0	2	1815.87	4598.79	11700000	407	422
Mudpit_Aged_L3_4Left_IAF	ATP synthase subunit beta, mitochondrial OS=Homo sapiens GN=ATP5B PE=1 SV=3	P06576,V9HW31	ATP5B,HEL-S-271	56560.6	7	8	9	TVLIMELINNVAK	K	A	0.997	59.8	25	17.4	59.1	0	1	0	0	2	1457.84	9028.17	7799360	213	225
Mudpit_Aged_L3_4Left_IAF	ATP synthase subunit beta, mitochondrial OS=Homo sapiens GN=ATP5B PE=1 SV=3	P06576,V9HW31	ATP5B,HEL-S-271	56560.6	7	8	9	VALTGLTVAEYFR	R	D	0.997	93.4	25	18.8	93.4	0	2	0	0	2	1439.79	7925.03	9762940	282	294
Mudpit_Aged_L3_4Left_IAF	ATP synthase subunit beta, mitochondrial OS=Homo sapiens GN=ATP5B PE=1 SV=3	P06576,V9HW31	ATP5B,HEL-S-271	56560.6	7	8	9	VALTGLTVAEYFRDQEGQDVLLFIDNIFR	R	F	0.992	53.1	26.9	16.3	53.1	0	0	1	0	2	3342.74	9350.47	2631160	282	310
Mudpit_Aged_L3_4Left_IAF	C3 and PZP-like alpha-2-macroglobulin domain-containing protein 8 OS=Homo sapiens GN=CPAMD8 PE=1 SV=2	Q8IZJ3	CPAMD8	206699	2	2	2	DMIPADVPEHFR	R	G	0.977	34.4	25	15.1	34.4	0	0	1	0	2	1426.68	5213.63	4788780	302	313
Mudpit_Aged_L3_4Left_IAF	C3 and PZP-like alpha-2-macroglobulin domain-containing protein 8 OS=Homo sapiens GN=CPAMD8 PE=1 SV=2	Q8IZJ3	CPAMD8	206699	2	2	2	ILSWDEFR	K	T	0.99	34.2	25.6	19.2	30.1	0	1	0	0	2	1065.54	6490.51	4810330	1029	1036
Mudpit_Aged_L3_4Left_IAF	Alpha-crystallin B chain (Fragment) OS=Homo sapiens GN=CRYAB PE=1 SV=1	E9PR44,P02511,V9HW27	CRYAB,HEL-S-101	20159.5	4	6	9	APSWFDTGLSEMR	R	L	0.997	52.4	25	16.3	52.4	0	4	0	0	2	1496.68	7228.56	15800000	57	69
Mudpit_Aged_L3_4Left_IAF	Alpha-crystallin B chain (Fragment) OS=Homo sapiens GN=CRYAB PE=1 SV=1	E9PR44,P02511,V9HW27	CRYAB,HEL-S-101	20159.5	4	6	9	FSVNLDVK	R	H	0.99	41.3	28	17.6	39.3	0	1	0	0	2	921.504	4639.12	25100000	75	82
Mudpit_Aged_L3_4Left_IAF	Alpha-crystallin B chain (Fragment) OS=Homo sapiens GN=CRYAB PE=1 SV=1	E9PR44,P02511,V9HW27	CRYAB,HEL-S-101	20159.5	4	6	9	IPADVDPLTITSSLSSDGVLTVNGPR	R	K	0.997	81.1	25.9	18.1	81.1	0	0	1	0	2	2624.38	9002.03	6431330	124	149
Mudpit_Aged_L3_4Left_IAF	Alpha-crystallin B chain (Fragment) OS=Homo sapiens GN=CRYAB PE=1 SV=1	E9PR44,P02511,V9HW27	CRYAB,HEL-S-101	20159.5	4	6	9	VLGDVIEVHGK	K	H	0.997	76.8	25.6	17.8	76.8	0	1	2	0	2	1165.66	2768.69	16300000	93	103
Mudpit_Aged_L3_4Left_IAF	ATP synthase subunit alpha, mitochondrial OS=Homo sapiens GN=ATP5A1 PE=1 SV=1	P25705,V9HW26	ATP5A1,HEL-S-123m	59752.1	5	5	5	AVDSLVPIGR	K	G	0.997	43.7	25	15.7	43.7	0	1	0	0	2	1026.59	4718.86	11100000	195	204
Mudpit_Aged_L3_4Left_IAF	ATP synthase subunit alpha, mitochondrial OS=Homo sapiens GN=ATP5A1 PE=1 SV=1	P25705,V9HW26	ATP5A1,HEL-S-123m	59752.1	5	5	5	EAYPGDVFYLHSR	R	L	0.99	41.6	25.6	15.6	41.6	0	0	1	0	2	1553.74	5077.03	10800000	335	347
Mudpit_Aged_L3_4Left_IAF	ATP synthase subunit alpha, mitochondrial OS=Homo sapiens GN=ATP5A1 PE=1 SV=1	P25705,V9HW26	ATP5A1,HEL-S-123m	59752.1	5	5	5	HALIIYDDLSK	K	Q	0.997	39.2	27.5	15.4	39.2	0	1	0	0	2	1287.69	4413.43	6418440	306	316
Mudpit_Aged_L3_4Left_IAF	ATP synthase subunit alpha, mitochondrial OS=Homo sapiens GN=ATP5A1 PE=1 SV=1	P25705,V9HW26	ATP5A1,HEL-S-123m	59752.1	5	5	5	MNDAFGGGSLTALPVIETQAGDVSAYIPTNVISITDGQIFLETELFYK	K	G	0.969	36.8	25	15.3	36.8	0	0	0	1	2	5122.55	9404.75	4566610	355	402
Mudpit_Aged_L3_4Left_IAF	ATP synthase subunit alpha, mitochondrial OS=Homo sapiens GN=ATP5A1 PE=1 SV=1	P25705,V9HW26	ATP5A1,HEL-S-123m	59752.1	5	5	5	TGAIVDVPVGEELLGR	R	V	0.997	37.2	26.3	15.3	37.2	0	1	0	0	2	1624.89	7572.02	5631750	134	149
Mudpit_Aged_L3_4Left_IAF	Heat shock cognate 71 kDa protein OS=Homo sapiens GN=HSPA8 PE=1 SV=1	E9PKE3,P11142,Q53HF2,V9HW22	HEL-S-72p,HSPA8	70899.8	5	5	6	FEELNADLFR	R	G	0.997	64.5	25	17	64.5	0	2	0	0	2	1253.62	6608.82	17000000	302	311
Mudpit_Aged_L3_4Left_IAF	Heat shock cognate 71 kDa protein OS=Homo sapiens GN=HSPA8 PE=1 SV=1	E9PKE3,P11142,Q53HF2,V9HW22	HEL-S-72p,HSPA8	70899.8	5	5	6	NQVAMNPTNTVFDAK	K	R	0.997	76.7	27.2	17.8	76.7	0	1	0	0	2	1649.8	4694.25	3263010	57	71
Mudpit_Aged_L3_4Left_IAF	Heat shock cognate 71 kDa protein OS=Homo sapiens GN=HSPA8 PE=1 SV=1	E9PKE3,P11142,Q53HF2,V9HW22	HEL-S-72p,HSPA8	70899.8	5	5	6	NVLIFDLGGGTFDVSILTIEDGIFEVK	R	S	0.953	31.6	25	15	31.6	0	0	1	0	2	2911.53	9414.47	692177	194	220
Mudpit_Aged_L3_4Left_IAF	Heat shock cognate 71 kDa protein OS=Homo sapiens GN=HSPA8 PE=1 SV=1	E9PKE3,P11142,Q53HF2,V9HW22	HEL-S-72p,HSPA8	70899.8	5	5	6	QTQTFTTYSDNQPGVLIQVYEGER	K	A	0.985	45.5	25.9	15.8	45.5	0	0	1	0	2	2774.33	7532.66	4590820	424	447
Mudpit_Aged_L3_4Left_IAF	Heat shock cognate 71 kDa protein OS=Homo sapiens GN=HSPA8 PE=1 SV=1	E9PKE3,P11142,Q53HF2,V9HW22	HEL-S-72p,HSPA8	70899.8	5	5	6	STAGDTHLGGEDFDNR	K	M	0.954	32.4	25	15	32.4	0	0	1	0	2	1691.73	1887.97	5358440	221	236
Mudpit_Aged_L3_4Left_IAF	Serine protease HTRA3 OS=Homo sapiens GN=HTRA3 PE=1 SV=2	P83110	HTRA3	48608.5	9	11	21	ALQLSGTPVR	R	Q	0.997	35.5	25	15.2	35.5	0	3	0	0	2	1041.61	2888.31	20400000	110	119
Mudpit_Aged_L3_4Left_IAF	Serine protease HTRA3 OS=Homo sapiens GN=HTRA3 PE=1 SV=2	P83110	HTRA3	48608.5	9	11	21	ASNPDFPEVSSGIYVQEVAPNSPSQR	K	G	0.997	82.2	28.8	18.1	82.2	0	2	1	0	2	2775.32	6799.42	10800000	374	399
Mudpit_Aged_L3_4Left_IAF	Serine protease HTRA3 OS=Homo sapiens GN=HTRA3 PE=1 SV=2	P83110	HTRA3	48608.5	9	11	21	FLTEFQDK	R	Q	0.99	35.7	25	15.2	35.7	0	2	0	0	2	1027.51	3894.76	20900000	340	347
Mudpit_Aged_L3_4Left_IAF	Serine protease HTRA3 OS=Homo sapiens GN=HTRA3 PE=1 SV=2	P83110	HTRA3	48608.5	9	11	21	FNFIADVVEK	K	I	0.997	45.3	26.5	15.8	45.3	0	2	0	0	2	1181.62	6910.01	54000000	140	149
Mudpit_Aged_L3_4Left_IAF	Serine protease HTRA3 OS=Homo sapiens GN=HTRA3 PE=1 SV=2	P83110	HTRA3	48608.5	9	11	21	GGIQDGDIIVK	R	V	0.997	66.8	27.6	17.2	66.8	0	1	0	0	2	1114.61	3739.5	35600000	400	410
Mudpit_Aged_L3_4Left_IAF	Serine protease HTRA3 OS=Homo sapiens GN=HTRA3 PE=1 SV=2	P83110	HTRA3	48608.5	9	11	21	NVPLSSGSGFIMSEAGLIITNAHVVSSNSAAPGR	R	Q	0.997	52.1	25.4	16.3	52.1	0	0	1	1	2	3340.7	8938.59	10700000	169	202
Mudpit_Aged_L3_4Left_IAF	Serine protease HTRA3 OS=Homo sapiens GN=HTRA3 PE=1 SV=2	P83110	HTRA3	48608.5	9	11	21	RGNDDLLFSIAPEVVM	R	-	0.997	66	27.4	17.1	66	0	1	0	0	2	1791.89	8778.01	2653030	438	453
Mudpit_Aged_L3_4Left_IAF	Serine protease HTRA3 OS=Homo sapiens GN=HTRA3 PE=1 SV=2	P83110	HTRA3	48608.5	9	11	21	TITPSLVDELK	R	A	0.997	48.4	26.3	16	48.4	0	5	0	0	2	1215.68	5744.94	117000000	363	373
Mudpit_Aged_L3_4Left_IAF	Serine protease HTRA3 OS=Homo sapiens GN=HTRA3 PE=1 SV=2	P83110	HTRA3	48608.5	9	11	21	VTAGISFAIPSDR	K	I	0.997	93.7	27.1	18.9	93.7	0	2	0	0	2	1333.71	6115.68	44500000	324	336
Mudpit_Aged_L3_4Left_IAF	Nidogen-2 OS=Homo sapiens GN=NID2 PE=1 SV=3	Q14112	NID2	151253	15	16	22	AGLELGAEPETIVNSGLISPEGLAIDHIR	R	R	0.997	99	25	19.2	99	0	0	1	0	2	2971.57	8913.83	29400000	1169	1197
Mudpit_Aged_L3_4Left_IAF	Nidogen-2 OS=Homo sapiens GN=NID2 PE=1 SV=3	Q14112	NID2	151253	15	16	22	ELYHYSDSTVTSTSSR	K	D	0.997	68.8	25	17.3	68.8	0	1	0	0	2	1832.83	2398.05	1465390	668	683
Mudpit_Aged_L3_4Left_IAF	Nidogen-2 OS=Homo sapiens GN=NID2 PE=1 SV=3	Q14112	NID2	151253	15	16	22	ENLLEHYGGTPR	R	D	0.997	63	28.1	17.2	62.7	0	1	0	0	2	1385.68	2993.29	2456410	1024	1035
Mudpit_Aged_L3_4Left_IAF	Nidogen-2 OS=Homo sapiens GN=NID2 PE=1 SV=3	Q14112	NID2	151253	15	16	22	FAVTNQIGPVK	R	E	0.997	42.8	27.1	15.7	42.8	0	2	0	0	2	1173.66	4141.91	8124630	742	752
Mudpit_Aged_L3_4Left_IAF	Nidogen-2 OS=Homo sapiens GN=NID2 PE=1 SV=3	Q14112	NID2	151253	15	16	22	FTPTHAFLATWEQVGAYEEVK	R	R	0.994	46.6	25.7	15.9	46.6	0	0	1	0	2	2424.19	7871.05	2101910	150	170
Mudpit_Aged_L3_4Left_IAF	Nidogen-2 OS=Homo sapiens GN=NID2 PE=1 SV=3	Q14112	NID2	151253	15	16	22	GNLYWTDWNR	R	E	0.995	31.4	25	15	31.4	0	2	0	0	2	1324.61	6198.28	10800000	1241	1250
Mudpit_Aged_L3_4Left_IAF	Nidogen-2 OS=Homo sapiens GN=NID2 PE=1 SV=3	Q14112	NID2	151253	15	16	22	HPSFPTTQQLNVDR	R	V	0.997	63.8	26.6	17	63.8	0	0	1	0	2	1639.82	3498.85	4269380	715	728
Mudpit_Aged_L3_4Left_IAF	Nidogen-2 OS=Homo sapiens GN=NID2 PE=1 SV=3	Q14112	NID2	151253	15	16	22	IESALLDGSER	K	K	0.997	53	26.7	16.3	53	0	3	0	0	2	1189.61	3331.86	14500000	1210	1220
Mudpit_Aged_L3_4Left_IAF	Nidogen-2 OS=Homo sapiens GN=NID2 PE=1 SV=3	Q14112	NID2	151253	15	16	22	ILINTDIGLPNGLTFDPFSK	R	L	0.997	43.8	25.8	15.7	43.8	0	1	0	0	2	2175.17	9110.31	5485540	1267	1286
Mudpit_Aged_L3_4Left_IAF	Nidogen-2 OS=Homo sapiens GN=NID2 PE=1 SV=3	Q14112	NID2	151253	15	16	22	ITQTAEGLDPENYLSIK	R	T	0.997	91.9	27.7	18.7	91.9	0	1	0	0	2	1891.97	7081.02	19900000	629	645
Mudpit_Aged_L3_4Left_IAF	Nidogen-2 OS=Homo sapiens GN=NID2 PE=1 SV=3	Q14112	NID2	151253	15	16	22	MVYWTDVAGR	R	T	0.997	47.7	25.1	16	47.7	0	2	0	0	2	1197.57	4970.28	16300000	1155	1164
Mudpit_Aged_L3_4Left_IAF	Nidogen-2 OS=Homo sapiens GN=NID2 PE=1 SV=3	Q14112	NID2	151253	15	16	22	SEGPYFSLTSTEQSVK	K	N	0.997	77.8	25	17.9	77.8	0	1	0	0	2	1759.84	5538.02	2473010	237	252
Mudpit_Aged_L3_4Left_IAF	Nidogen-2 OS=Homo sapiens GN=NID2 PE=1 SV=3	Q14112	NID2	151253	15	16	22	SGYEFADDR	R	H	0.997	41.2	25	15.6	41.2	0	2	0	0	2	1059.44	2154.14	27300000	831	839
Mudpit_Aged_L3_4Left_IAF	Nidogen-2 OS=Homo sapiens GN=NID2 PE=1 SV=3	Q14112	NID2	151253	15	16	22	TMYWTDSVLDK	R	I	0.997	39.4	25	15.5	39.4	0	1	0	0	2	1358.63	6115.63	10600000	1199	1209
Mudpit_Aged_L3_4Left_IAF	Nidogen-2 OS=Homo sapiens GN=NID2 PE=1 SV=3	Q14112	NID2	151253	15	16	22	VLFYTDLVNPR	K	A	0.997	56	25.5	16.5	56	0	2	0	0	2	1336.73	6908.57	16500000	1222	1232
Mudpit_Aged_L3_4Left_IAF	Peroxiredoxin-2 OS=Homo sapiens GN=PRDX2 PE=1 SV=5	P32119,V9HW12	HEL-S-2a,PRDX2	21892.4	3	3	4	EGGLGPLNIPLLADVTR	K	R	0.997	85.6	25	18.4	85.6	0	1	0	0	2	1734.98	9073.68	19300000	93	109
Mudpit_Aged_L3_4Left_IAF	Peroxiredoxin-2 OS=Homo sapiens GN=PRDX2 PE=1 SV=5	P32119,V9HW12	HEL-S-2a,PRDX2	21892.4	3	3	4	GLFIIDGK	R	G	0.978	30	25	15.2	29.8	0	2	0	0	2	862.504	5737.93	9545380	128	135
Mudpit_Aged_L3_4Left_IAF	Peroxiredoxin-2 OS=Homo sapiens GN=PRDX2 PE=1 SV=5	P32119,V9HW12	HEL-S-2a,PRDX2	21892.4	3	3	4	KEGGLGPLNIPLLADVTR	R	R	0.965	34.7	25	15.2	34.7	0	0	1	0	2	1863.07	8256.57	4683060	92	109
Mudpit_Aged_L3_4Left_IAF	Nuclear envelope protein okuribin OS=Homo sapiens GN=okuribin PE=2 SV=1	A3KC71,Q76M96	CCDC80,okuribin	108176	17	22	62	ASGVEGQVVAEGNDGGGGAGRPSLGSEK	K	K	0.997	60.6	26.4	16.8	60.6	0	0	4	0	2	2542.21	3012.62	12600000	283	310
Mudpit_Aged_L3_4Left_IAF	Nuclear envelope protein okuribin OS=Homo sapiens GN=okuribin PE=2 SV=1	A3KC71,Q76M96	CCDC80,okuribin	108176	17	22	62	DPNVVPGPPKPAK	R	E	0.945	31.9	26.5	15	31.9	0	0	1	0	2	1315.74	1694.29	3331860	477	489
Mudpit_Aged_L3_4Left_IAF	Nuclear envelope protein okuribin OS=Homo sapiens GN=okuribin PE=2 SV=1	A3KC71,Q76M96	CCDC80,okuribin	108176	17	22	62	HIQQIVLFHQAGEEGGK	R	V	0.996	55.9	27.5	16.5	55.9	0	0	2	2	2	1890.98	3036.54	43700000	183	199
Mudpit_Aged_L3_4Left_IAF	Nuclear envelope protein okuribin OS=Homo sapiens GN=okuribin PE=2 SV=1	A3KC71,Q76M96	CCDC80,okuribin	108176	17	22	62	IDHFQLDNEKPMR	K	V	0.954	34.6	26.1	15.2	34.6	0	0	0	1	2	1642.8	2268.83	12700000	673	685
Mudpit_Aged_L3_4Left_IAF	Nuclear envelope protein okuribin OS=Homo sapiens GN=okuribin PE=2 SV=1	A3KC71,Q76M96	CCDC80,okuribin	108176	17	22	62	ITSEGQILEQPLDPSLIPK	R	L	0.997	58.3	25	16.6	58.3	0	4	0	0	2	2078.14	7759.11	21000000	203	221
Mudpit_Aged_L3_4Left_IAF	Nuclear envelope protein okuribin OS=Homo sapiens GN=okuribin PE=2 SV=1	A3KC71,Q76M96	CCDC80,okuribin	108176	17	22	62	LEAMYEVIDQGPIR	R	R	0.997	110	34	20.8	109	0	6	2	0	2	1649.82	6064.59	57800000	254	267
Mudpit_Aged_L3_4Left_IAF	Nuclear envelope protein okuribin OS=Homo sapiens GN=okuribin PE=2 SV=1	A3KC71,Q76M96	CCDC80,okuribin	108176	17	22	62	LLLITAPK	R	A	0.99	61.3	25	21.7	56.5	0	2	0	0	2	868.587	4813.26	34600000	625	632
Mudpit_Aged_L3_4Left_IAF	Nuclear envelope protein okuribin OS=Homo sapiens GN=okuribin PE=2 SV=1	A3KC71,Q76M96	CCDC80,okuribin	108176	17	22	62	QEMAIQQSLGMR	R	C	0.997	37.2	25	15.3	37.2	0	1	0	0	2	1423.67	1935.21	2559630	901	912
Mudpit_Aged_L3_4Left_IAF	Nuclear envelope protein okuribin OS=Homo sapiens GN=okuribin PE=2 SV=1	A3KC71,Q76M96	CCDC80,okuribin	108176	17	22	62	QSLENFLSR	K	F	0.997	70.5	27.3	27.4	60.5	0	2	0	0	2	1093.56	5146.76	14800000	766	774
Mudpit_Aged_L3_4Left_IAF	Nuclear envelope protein okuribin OS=Homo sapiens GN=okuribin PE=2 SV=1	A3KC71,Q76M96	CCDC80,okuribin	108176	17	22	62	QYYEVPITMK	K	S	0.997	39.4	25	15.5	39.4	0	2	0	0	2	1271.63	5242.08	20300000	725	734
Mudpit_Aged_L3_4Left_IAF	Nuclear envelope protein okuribin OS=Homo sapiens GN=okuribin PE=2 SV=1	A3KC71,Q76M96	CCDC80,okuribin	108176	17	22	62	RITSEGQILEQPLDPSLIPK	R	L	0.951	31.8	25	15	31.8	0	0	1	0	2	2234.24	6702.07	4948620	202	221
Mudpit_Aged_L3_4Left_IAF	Nuclear envelope protein okuribin OS=Homo sapiens GN=okuribin PE=2 SV=1	A3KC71,Q76M96	CCDC80,okuribin	108176	17	22	62	STLEEPNLQPLQR	R	R	0.997	72.9	26.6	17.6	72.9	0	1	0	0	2	1524.8	4881.54	9468780	64	76
Mudpit_Aged_L3_4Left_IAF	Nuclear envelope protein okuribin OS=Homo sapiens GN=okuribin PE=2 SV=1	A3KC71,Q76M96	CCDC80,okuribin	108176	17	22	62	SVADLLGSFEGK	K	R	0.997	64.9	26.9	17.1	64.9	0	6	0	0	2	1222.63	7716.06	37400000	611	622
Mudpit_Aged_L3_4Left_IAF	Nuclear envelope protein okuribin OS=Homo sapiens GN=okuribin PE=2 SV=1	A3KC71,Q76M96	CCDC80,okuribin	108176	17	22	62	SVFDLIDTFQSR	K	I	0.997	67.4	26.3	17.2	67.4	0	8	1	0	2	1427.72	8924.36	158000000	735	746
Mudpit_Aged_L3_4Left_IAF	Nuclear envelope protein okuribin OS=Homo sapiens GN=okuribin PE=2 SV=1	A3KC71,Q76M96	CCDC80,okuribin	108176	17	22	62	VVDDEDLVDQR	R	L	0.997	85.2	25	18.3	85.2	0	9	0	0	2	1302.62	2843.01	73100000	686	696
Mudpit_Aged_L3_4Left_IAF	Nuclear envelope protein okuribin OS=Homo sapiens GN=okuribin PE=2 SV=1	A3KC71,Q76M96	CCDC80,okuribin	108176	17	22	62	VWVISAPHASEGYYR	R	L	0.997	73.9	25.4	17.6	73.9	0	4	2	0	2	1734.86	5025.85	46800000	151	165
Mudpit_Aged_L3_4Left_IAF	Nuclear envelope protein okuribin OS=Homo sapiens GN=okuribin PE=2 SV=1	A3KC71,Q76M96	CCDC80,okuribin	108176	17	22	62	YDLSRPTASQLEDELQVGNVPLK	K	K	0.997	54	27	16.4	54	0	0	1	0	2	2572.33	7313.51	1667260	510	532
Mudpit_Aged_L3_4Left_IAF	Histone H4 OS=Homo sapiens GN=HIST1H4J PE=2 SV=1	B2R4R0,P62805,Q0VAS5	HIST1H4A,HIST1H4H,HIST1H4J	11367.7	4	6	16	DNIQGITKPAIR	R	R	0.994	32.2	25.8	15	32.2	0	1	0	0	2	1325.75	2470.38	6308510	25	36
Mudpit_Aged_L3_4Left_IAF	Histone H4 OS=Homo sapiens GN=HIST1H4J PE=2 SV=1	B2R4R0,P62805,Q0VAS5	HIST1H4A,HIST1H4H,HIST1H4J	11367.7	4	6	16	ISGLIYEETR	R	G	0.997	67.4	26.8	17.2	67.4	0	3	0	0	2	1180.62	4133.14	29900000	47	56
Mudpit_Aged_L3_4Left_IAF	Histone H4 OS=Homo sapiens GN=HIST1H4J PE=2 SV=1	B2R4R0,P62805,Q0VAS5	HIST1H4A,HIST1H4H,HIST1H4J	11367.7	4	6	16	TVTAMDVVYALK	K	R	0.997	66	25.8	17.1	66	0	9	1	0	2	1326.7	5872.75	94600000	81	92
Mudpit_Aged_L3_4Left_IAF	Histone H4 OS=Homo sapiens GN=HIST1H4J PE=2 SV=1	B2R4R0,P62805,Q0VAS5	HIST1H4A,HIST1H4H,HIST1H4J	11367.7	4	6	16	VFLENVIR	K	D	0.99	37.9	26.4	22.1	31.1	0	2	0	0	2	989.578	5519.78	13200000	61	68
Mudpit_Aged_L3_4Left_IAF	Pigment epithelium-derived factor OS=Homo sapiens GN=SERPINF1 PE=1 SV=4	A0A140VKF3_HUMAN,P36955	SERPINF1	46314.3	11	15	38	ALYYDLISSPDIHGTYK	R	E	0.997	86.8	26.2	18.4	86.8	0	4	2	0	2	1955.98	6399.5	77600000	107	123
Mudpit_Aged_L3_4Left_IAF	Pigment epithelium-derived factor OS=Homo sapiens GN=SERPINF1 PE=1 SV=4	A0A140VKF3_HUMAN,P36955	SERPINF1	46314.3	11	15	38	DTDTGALLFIGK	R	I	0.997	75.3	26.5	17.7	75.3	0	3	0	0	2	1250.66	7253.26	49100000	400	411
Mudpit_Aged_L3_4Left_IAF	Pigment epithelium-derived factor OS=Homo sapiens GN=SERPINF1 PE=1 SV=4	A0A140VKF3_HUMAN,P36955	SERPINF1	46314.3	11	15	38	ELLDTVTAPQK	K	N	0.997	59.5	27.7	16.7	59.5	0	3	0	0	2	1214.66	4043.05	21300000	124	134
Mudpit_Aged_L3_4Left_IAF	Pigment epithelium-derived factor OS=Homo sapiens GN=SERPINF1 PE=1 SV=4	A0A140VKF3_HUMAN,P36955	SERPINF1	46314.3	11	15	38	LAAAVSNFGYDLYR	K	V	0.997	84.7	26.8	18.3	84.7	0	2	1	0	2	1559.79	6616.47	42100000	54	67
Mudpit_Aged_L3_4Left_IAF	Pigment epithelium-derived factor OS=Homo sapiens GN=SERPINF1 PE=1 SV=4	A0A140VKF3_HUMAN,P36955	SERPINF1	46314.3	11	15	38	LDLQEINNWVQAQMK	R	G	0.997	84	26.8	18.2	84	0	4	1	0	2	1829.92	8370.18	40200000	175	189
Mudpit_Aged_L3_4Left_IAF	Pigment epithelium-derived factor OS=Homo sapiens GN=SERPINF1 PE=1 SV=4	A0A140VKF3_HUMAN,P36955	SERPINF1	46314.3	11	15	38	LQSLFDSPDFSK	K	I	0.997	74.4	26.2	17.7	74.4	0	7	0	0	2	1383.68	6429.46	77900000	334	345
Mudpit_Aged_L3_4Left_IAF	Pigment epithelium-derived factor OS=Homo sapiens GN=SERPINF1 PE=1 SV=4	A0A140VKF3_HUMAN,P36955	SERPINF1	46314.3	11	15	38	LSYEGEVTK	K	S	0.997	53.1	26	16.7	52.7	0	1	0	0	2	1025.52	1727.94	19600000	319	327
Mudpit_Aged_L3_4Left_IAF	Pigment epithelium-derived factor OS=Homo sapiens GN=SERPINF1 PE=1 SV=4	A0A140VKF3_HUMAN,P36955	SERPINF1	46314.3	11	15	38	SSFVAPLEK	K	S	0.997	37	26.4	15.3	37	0	2	0	0	2	977.53	3421.08	11900000	152	160
Mudpit_Aged_L3_4Left_IAF	Pigment epithelium-derived factor OS=Homo sapiens GN=SERPINF1 PE=1 SV=4	A0A140VKF3_HUMAN,P36955	SERPINF1	46314.3	11	15	38	TSLEDFYLDEER	K	T	0.997	85.8	25	18.4	85.8	0	5	0	0	2	1516.68	6660.47	34500000	226	237
Mudpit_Aged_L3_4Left_IAF	Pigment epithelium-derived factor OS=Homo sapiens GN=SERPINF1 PE=1 SV=4	A0A140VKF3_HUMAN,P36955	SERPINF1	46314.3	11	15	38	TVQAVLTVPK	K	L	0.997	48	25	16	48	0	2	0	0	2	1055.65	3840.09	18600000	307	316
Mudpit_Aged_L3_4Left_IAF	Pigment epithelium-derived factor OS=Homo sapiens GN=SERPINF1 PE=1 SV=4	A0A140VKF3_HUMAN,P36955	SERPINF1	46314.3	11	15	38	VPMMSDPK	R	A	0.983	26.4	25	14.7	26.4	0	1	0	0	2	904.427	1685.93	3377150	241	248
Mudpit_Aged_L3_4Left_IAF	Uncharacterized protein OS=Homo sapiens PE=1 SV=1	A8K008		51595.7	2	2	4	NTLYLQMNSLK	K	T	0.997	42.3	33	16	0	0	2	0	0	2	1324.69	5362.21	8567290	98	108
Mudpit_Aged_L3_4Left_IAF	Uncharacterized protein OS=Homo sapiens PE=1 SV=1	A8K008		51595.7	2	2	4	TDGGTTDYAAPVK	K	G	0.997	84.3	25	18.3	84.3	0	2	0	0	2	1295.61	1773.61	21100000	74	86
Mudpit_Aged_L3_4Left_IAF	Ribosomal protein, large, P2, isoform CRA_a OS=Homo sapiens GN=RPLP2 PE=3 SV=1	A0A024RCA7,P05387	RPLP2	11665.5	2	2	3	NIEDVIAQGIGK	K	L	0.997	43.4	26.3	15.7	43.4	0	2	0	0	2	1256.68	6602.91	14800000	50	61
Mudpit_Aged_L3_4Left_IAF	Ribosomal protein, large, P2, isoform CRA_a OS=Homo sapiens GN=RPLP2 PE=3 SV=1	A0A024RCA7,P05387	RPLP2	11665.5	2	2	3	YVASYLLAALGGNSSPSAK	R	D	0.995	30.5	25	14.9	30.5	0	1	0	0	2	1868.98	7937.57	1976530	3	21
Mudpit_Aged_L3_4Left_IAF	TIMP metallopeptidase inhibitor 2, isoform CRA_b OS=Homo sapiens GN=TIMP2 PE=4 SV=1	A0A024R8V7,A0A140VK57_HUMAN,P16035	TIMP2	24399.9	2	2	2	EVDSGNDIYGNPIK	K	R	0.997	55.1	26.6	16.4	55.1	0	1	0	0	2	1520.72	4043.55	4910600	54	67
Mudpit_Aged_L3_4Left_IAF	TIMP metallopeptidase inhibitor 2, isoform CRA_b OS=Homo sapiens GN=TIMP2 PE=4 SV=1	A0A024R8V7,A0A140VK57_HUMAN,P16035	TIMP2	24399.9	2	2	2	QEFLDIEDP	K	-	0.997	43.1	25	15.7	43.1	0	1	0	0	2	1105.51	7423.27	3273570	212	220
Mudpit_Aged_L3_4Left_IAF	Complement component C6 OS=Homo sapiens GN=C6 PE=1 SV=3	P13671	C6	104786	8	12	25	ALNHLPLEYNSALYSR	K	I	0.997	53.3	28.5	16.3	53.3	0	2	2	0	2	1860.96	5487.02	52000000	341	356
Mudpit_Aged_L3_4Left_IAF	Complement component C6 OS=Homo sapiens GN=C6 PE=1 SV=3	P13671	C6	104786	8	12	25	DLHLSDVFLK	K	A	0.997	51.8	26.6	16.2	51.8	0	1	3	0	2	1186.65	6523.34	46500000	331	340
Mudpit_Aged_L3_4Left_IAF	Complement component C6 OS=Homo sapiens GN=C6 PE=1 SV=3	P13671	C6	104786	8	12	25	DLTSLGHNENQQGSFSSQGGSSFSVPIFYSSK	K	R	0.997	116	25	20.3	116	0	0	3	0	2	3392.57	7916.19	31200000	257	288
Mudpit_Aged_L3_4Left_IAF	Complement component C6 OS=Homo sapiens GN=C6 PE=1 SV=3	P13671	C6	104786	8	12	25	ENPAVIDFELAPIVDLVR	K	N	0.997	77.9	25.3	17.9	77.9	0	1	1	0	2	2010.09	9189.56	32300000	478	495
Mudpit_Aged_L3_4Left_IAF	Complement component C6 OS=Homo sapiens GN=C6 PE=1 SV=3	P13671	C6	104786	8	12	25	QLEWGLER	R	T	0.99	41	28.5	34.8	21.8	0	1	0	0	2	1030.53	4748.05	78100000	842	849
Mudpit_Aged_L3_4Left_IAF	Complement component C6 OS=Homo sapiens GN=C6 PE=1 SV=3	P13671	C6	104786	8	12	25	SEYGAALAWEK	R	G	0.997	46.3	25	15.9	46.3	0	2	0	0	2	1224.59	4784.38	52900000	449	459
Mudpit_Aged_L3_4Left_IAF	Complement component C6 OS=Homo sapiens GN=C6 PE=1 SV=3	P13671	C6	104786	8	12	25	TFSEWLESVK	K	E	0.997	51.4	25	16.2	51.4	0	1	0	0	2	1225.61	6905.32	4295020	468	477
Mudpit_Aged_L3_4Left_IAF	Complement component C6 OS=Homo sapiens GN=C6 PE=1 SV=3	P13671	C6	104786	8	12	25	VPANLENVGFEVQTAEDDLK	R	T	0.997	143	26.7	21.9	143	0	5	3	0	2	2188.08	7787.01	85700000	232	251
Mudpit_Aged_L3_4Left_IAF	Collagen, type I, alpha 1, isoform CRA_a OS=Homo sapiens GN=COL1A1 PE=4 SV=1	D3DTX7	COL1A1	84740.7	2	4	23	GETGPAGPAGPVGPVGAR	R	G	0.997	98.2	30.4	19.1	98.2	0	9	3	0	2	1546.8	2961.22	219000000	488	505
Mudpit_Aged_L3_4Left_IAF	Collagen, type I, alpha 1, isoform CRA_a OS=Homo sapiens GN=COL1A1 PE=4 SV=1	D3DTX7	COL1A1	84740.7	2	4	23	SGDRGETGPAGPAGPVGPVGAR	K	G	0.997	96	26.4	19	96	0	3	8	0	2	1961.98	2112.6	271000000	484	505
Mudpit_Aged_L3_4Left_IAF	Protein disulfide-isomerase A4 OS=Homo sapiens GN=ERP70 PE=3 SV=1	A0A090N8Y2,P13667	ERP70,PDIA4	72934	4	4	5	DGDDVIIIGVFK	K	G	0.997	38.8	26.6	15.4	38.8	0	1	0	0	2	1290.69	8552.11	2343590	302	313
Mudpit_Aged_L3_4Left_IAF	Protein disulfide-isomerase A4 OS=Homo sapiens GN=ERP70 PE=3 SV=1	A0A090N8Y2,P13667	ERP70,PDIA4	72934	4	4	5	FDVSGYPTLK	R	I	0.994	33.8	25.6	15.1	0	0	2	0	0	2	1126.58	5133.87	11000000	247	256
Mudpit_Aged_L3_4Left_IAF	Protein disulfide-isomerase A4 OS=Homo sapiens GN=ERP70 PE=3 SV=1	A0A090N8Y2,P13667	ERP70,PDIA4	72934	4	4	5	FHHTFSTEIAK	K	F	0.978	38.4	27.3	15.4	38.4	0	0	1	0	2	1317.66	1285.53	2095800	336	346
Mudpit_Aged_L3_4Left_IAF	Protein disulfide-isomerase A4 OS=Homo sapiens GN=ERP70 PE=3 SV=1	A0A090N8Y2,P13667	ERP70,PDIA4	72934	4	4	5	VEGFPTIYFAPSGDK	K	K	0.997	58.6	25.7	16.7	58.6	0	1	0	0	2	1627.8	7467.89	3157050	597	611
Mudpit_Aged_L3_4Left_IAF	Protein S100-A13 OS=Homo sapiens GN=S100A13 PE=1 SV=1	Q99584	S100A13	11471.7	3	3	4	DSLSVNEFK	K	E	0.997	39.5	26	15.5	39.5	0	1	0	0	2	1038.51	4021.99	5797400	31	39
Mudpit_Aged_L3_4Left_IAF	Protein S100-A13 OS=Homo sapiens GN=S100A13 PE=1 SV=1	Q99584	S100A13	11471.7	3	3	4	ELVTQQLPHLLK	K	D	0.976	36.5	25	15.3	36.5	0	0	1	0	2	1418.84	5403.19	2913500	40	51
Mudpit_Aged_L3_4Left_IAF	Protein S100-A13 OS=Homo sapiens GN=S100A13 PE=1 SV=1	Q99584	S100A13	11471.7	3	3	4	SLDVNQDSELK	K	F	0.997	61.8	25.8	16.9	61.8	0	2	0	0	2	1247.61	2426.73	5712780	62	72
Mudpit_Aged_L3_4Left_IAF	Stem cell growth factor; lymphocyte secreted C-type lectin OS=Homo sapiens PE=2 SV=1	Q5U0B9,Q9Y240	CLEC11A	35694.4	5	6	10	AALAPYNWPVWLGVHDR	R	R	0.997	72.7	26.4	17.5	72.7	0	1	0	0	2	1965.01	8101.91	2816290	229	245
Mudpit_Aged_L3_4Left_IAF	Stem cell growth factor; lymphocyte secreted C-type lectin OS=Homo sapiens PE=2 SV=1	Q5U0B9,Q9Y240	CLEC11A	35694.4	5	6	10	DAVQALQEAQGR	R	A	0.997	81.8	25.4	28	72	0	1	1	0	2	1285.65	3678.9	64700000	155	166
Mudpit_Aged_L3_4Left_IAF	Stem cell growth factor; lymphocyte secreted C-type lectin OS=Homo sapiens PE=2 SV=1	Q5U0B9,Q9Y240	CLEC11A	35694.4	5	6	10	DFEAQAAAQAR	R	C	0.997	84.2	31	18.3	84.2	0	2	0	0	2	1177.56	2984.26	22300000	193	203
Mudpit_Aged_L3_4Left_IAF	Stem cell growth factor; lymphocyte secreted C-type lectin OS=Homo sapiens PE=2 SV=1	Q5U0B9,Q9Y240	CLEC11A	35694.4	5	6	10	LAGLDAGLHQLHVR	R	L	0.997	70.3	25.1	17.4	70.3	0	0	0	3	2	1499.84	4407.51	29100000	115	128
Mudpit_Aged_L3_4Left_IAF	Stem cell growth factor; lymphocyte secreted C-type lectin OS=Homo sapiens PE=2 SV=1	Q5U0B9,Q9Y240	CLEC11A	35694.4	5	6	10	VVELTQGLR	R	Q	0.997	44.2	27.3	16.9	43.1	0	2	0	0	2	1014.59	3327.71	27000000	136	144
Mudpit_Aged_L3_4Left_IAF	Phospholipid transfer protein, isoform CRA_c OS=Homo sapiens GN=PLTP PE=2 SV=1	B3KUE5,P55058	PLTP	54741.2	6	8	11	AGALQLLLVGDK	R	V	0.997	95.2	25	18.9	95.2	0	2	0	0	2	1197.72	7125.88	13400000	283	294
Mudpit_Aged_L3_4Left_IAF	Phospholipid transfer protein, isoform CRA_c OS=Homo sapiens GN=PLTP PE=2 SV=1	B3KUE5,P55058	PLTP	54741.2	6	8	11	DPVASTSNLDMDFR	K	G	0.997	110	25	19.8	110	0	4	0	0	2	1567.71	5518.63	19000000	222	235
Mudpit_Aged_L3_4Left_IAF	Phospholipid transfer protein, isoform CRA_c OS=Homo sapiens GN=PLTP PE=2 SV=1	B3KUE5,P55058	PLTP	54741.2	6	8	11	FLEQELETITIPDLR	R	G	0.978	35.9	26.4	15.2	35.9	0	0	1	0	2	1816.97	8975.06	16500000	41	55
Mudpit_Aged_L3_4Left_IAF	Phospholipid transfer protein, isoform CRA_c OS=Homo sapiens GN=PLTP PE=2 SV=1	B3KUE5,P55058	PLTP	54741.2	6	8	11	GAFFPLTER	R	N	0.996	36.3	27.4	15.3	36.3	0	1	0	0	2	1037.54	5727	7577840	236	244
Mudpit_Aged_L3_4Left_IAF	Phospholipid transfer protein, isoform CRA_c OS=Homo sapiens GN=PLTP PE=2 SV=1	B3KUE5,P55058	PLTP	54741.2	6	8	11	TMLQIGVMPMLNER	K	T	0.997	44.6	27.6	16.7	43.8	0	1	0	0	2	1648.82	7256.25	4140980	416	429
Mudpit_Aged_L3_4Left_IAF	Phospholipid transfer protein, isoform CRA_c OS=Homo sapiens GN=PLTP PE=2 SV=1	B3KUE5,P55058	PLTP	54741.2	6	8	11	VPHDLDMLLR	K	A	0.997	75.1	31.3	24.5	68.2	0	1	1	0	2	1208.65	5347.59	9941650	295	304
Mudpit_Aged_L3_4Left_IAF	Keratin, type II cytoskeletal 5 OS=Homo sapiens GN=KRT5 PE=1 SV=3	P13647	KRT5	62379.6	4	6	7	ISISTSGGSFR	R	N	0.997	51.8	25.5	16.2	51.8	0	1	0	0	2	1111.57	3270.24	7606780	74	84
Mudpit_Aged_L3_4Left_IAF	Keratin, type II cytoskeletal 5 OS=Homo sapiens GN=KRT5 PE=1 SV=3	P13647	KRT5	62379.6	4	6	7	NKLAELEEALQK	R	A	0.997	64.2	27.2	24.6	56.6	0	1	1	0	2	1385.76	4992.2	8780540	430	441
Mudpit_Aged_L3_4Left_IAF	Keratin, type II cytoskeletal 5 OS=Homo sapiens GN=KRT5 PE=1 SV=3	P13647	KRT5	62379.6	4	6	7	SFSTASAITPSVSR	R	T	0.997	56.5	26.1	16.5	56.5	0	2	0	0	2	1410.72	3999.21	20800000	16	29
Mudpit_Aged_L3_4Left_IAF	Keratin, type II cytoskeletal 5 OS=Homo sapiens GN=KRT5 PE=1 SV=3	P13647	KRT5	62379.6	4	6	7	TEAESWYQTKYEELQQTAGR	R	H	0.997	72.4	35.8	17.5	72.4	0	1	1	0	2	2418.12	5612.19	10700000	355	374
Mudpit_Aged_L3_4Left_IAF	Laminin subunit alpha-5 OS=Homo sapiens GN=LAMA5 PE=1 SV=8	O15230	LAMA5	399725	5	5	5	DLADLAAYTALK	R	F	0.997	64.2	26.3	17	64.2	0	1	0	0	2	1264.68	7886.13	3489100	2752	2763
Mudpit_Aged_L3_4Left_IAF	Laminin subunit alpha-5 OS=Homo sapiens GN=LAMA5 PE=1 SV=8	O15230	LAMA5	399725	5	5	5	DTLASVFR	R	L	0.973	28.5	26.6	18.6	24.7	0	1	0	0	2	908.484	5178.45	6561300	2435	2442
Mudpit_Aged_L3_4Left_IAF	Laminin subunit alpha-5 OS=Homo sapiens GN=LAMA5 PE=1 SV=8	O15230	LAMA5	399725	5	5	5	GLLLFTAR	R	L	0.949	23.4	25	14.5	23.4	0	1	0	0	2	890.546	6054.29	4171230	3377	3384
Mudpit_Aged_L3_4Left_IAF	Laminin subunit alpha-5 OS=Homo sapiens GN=LAMA5 PE=1 SV=8	O15230	LAMA5	399725	5	5	5	GQDLGQAVLDAGHSVSTLEK	R	T	0.963	33.1	26.8	15.1	33.1	0	0	1	0	2	2025.03	6099.48	9714970	2669	2688
Mudpit_Aged_L3_4Left_IAF	Laminin subunit alpha-5 OS=Homo sapiens GN=LAMA5 PE=1 SV=8	O15230	LAMA5	399725	5	5	5	ILLVTDGAR	R	A	0.997	58.2	26.6	45.8	29.1	0	1	0	0	2	957.573	4177.1	2308600	3437	3445
Mudpit_Aged_L3_4Left_IAF	Keratin, type I cytoskeletal 10 OS=Homo sapiens GN=KRT10 PE=1 SV=6	P13645	KRT10	58828.8	19	26	34	ALEESNYELEGK	R	I	0.997	77	33.4	17.8	77	0	2	0	0	2	1381.65	2850.25	15200000	166	177
Mudpit_Aged_L3_4Left_IAF	Keratin, type I cytoskeletal 10 OS=Homo sapiens GN=KRT10 PE=1 SV=6	P13645	KRT10	58828.8	19	26	34	DAEAWFNEK	K	S	0.997	39.3	25	15.5	39.3	0	1	0	0	2	1109.49	4864.73	26400000	335	343
Mudpit_Aged_L3_4Left_IAF	Keratin, type I cytoskeletal 10 OS=Homo sapiens GN=KRT10 PE=1 SV=6	P13645	KRT10	58828.8	19	26	34	DAEAWFNEKSK	K	E	0.996	31.7	25	15	31.7	0	1	0	0	2	1324.62	3054.72	3600550	335	345
Mudpit_Aged_L3_4Left_IAF	Keratin, type I cytoskeletal 10 OS=Homo sapiens GN=KRT10 PE=1 SV=6	P13645	KRT10	58828.8	19	26	34	GSLGGGFSSGGFSGGSFSR	K	G	0.997	126	25	20.9	126	0	2	0	0	2	1707.77	5511.17	63700000	41	59
Mudpit_Aged_L3_4Left_IAF	Keratin, type I cytoskeletal 10 OS=Homo sapiens GN=KRT10 PE=1 SV=6	P13645	KRT10	58828.8	19	26	34	IRLENEIQTYR	K	S	0.956	34.3	29	15.1	34.3	0	0	1	0	2	1434.77	3168.93	7699280	440	450
Mudpit_Aged_L3_4Left_IAF	Keratin, type I cytoskeletal 10 OS=Homo sapiens GN=KRT10 PE=1 SV=6	P13645	KRT10	58828.8	19	26	34	ISSSKGSLGGGFSSGGFSGGSFSR	R	G	0.997	67.4	25	17.2	67.4	0	0	1	0	2	2210.05	4603.52	2979590	36	59
Mudpit_Aged_L3_4Left_IAF	Keratin, type I cytoskeletal 10 OS=Homo sapiens GN=KRT10 PE=1 SV=6	P13645	KRT10	58828.8	19	26	34	LASYLDKVR	R	A	0.997	48.3	25	52.6	11.7	0	1	2	0	2	1064.61	2070.2	84600000	157	165
Mudpit_Aged_L3_4Left_IAF	Keratin, type I cytoskeletal 10 OS=Homo sapiens GN=KRT10 PE=1 SV=6	P13645	KRT10	58828.8	19	26	34	LKYENEVALR	R	Q	0.997	73.8	26.5	48.5	42.9	0	0	1	0	2	1234.68	2098.28	12300000	236	245
Mudpit_Aged_L3_4Left_IAF	Keratin, type I cytoskeletal 10 OS=Homo sapiens GN=KRT10 PE=1 SV=6	P13645	KRT10	58828.8	19	26	34	NQILNLTTDNANILLQIDNAR	K	L	0.997	76.3	25.9	17.8	76.3	0	0	1	0	2	2367.26	8921.45	10200000	208	228
Mudpit_Aged_L3_4Left_IAF	Keratin, type I cytoskeletal 10 OS=Homo sapiens GN=KRT10 PE=1 SV=6	P13645	KRT10	58828.8	19	26	34	NVQALEIELQSQLALK	R	Q	0.997	62.3	25	16.9	62.3	0	0	1	0	2	1797.01	8318.42	4469140	371	386
Mudpit_Aged_L3_4Left_IAF	Keratin, type I cytoskeletal 10 OS=Homo sapiens GN=KRT10 PE=1 SV=6	P13645	KRT10	58828.8	19	26	34	NVSTGDVNVEMNAAPGVDLTQLLNNMR	R	S	0.997	121	25	20.6	114	0	3	5	0	2	2888.39	8782.88	441000000	296	322
Mudpit_Aged_L3_4Left_IAF	Keratin, type I cytoskeletal 10 OS=Homo sapiens GN=KRT10 PE=1 SV=6	P13645	KRT10	58828.8	19	26	34	QSLEASLAETEGR	K	Y	0.997	83.8	26.4	20.4	81.7	0	2	0	0	2	1390.68	3989.87	15500000	387	399
Mudpit_Aged_L3_4Left_IAF	Keratin, type I cytoskeletal 10 OS=Homo sapiens GN=KRT10 PE=1 SV=6	P13645	KRT10	58828.8	19	26	34	QSVEADINGLR	R	R	0.997	75.5	26.6	29	64.2	0	1	0	0	2	1201.62	3750.18	14100000	246	256
Mudpit_Aged_L3_4Left_IAF	Keratin, type I cytoskeletal 10 OS=Homo sapiens GN=KRT10 PE=1 SV=6	P13645	KRT10	58828.8	19	26	34	SKELTTEIDNNIEQISSYK	K	S	0.997	94.8	26.1	18.9	94.8	0	2	0	0	2	2212.1	6006.82	4725660	344	362
Mudpit_Aged_L3_4Left_IAF	Keratin, type I cytoskeletal 10 OS=Homo sapiens GN=KRT10 PE=1 SV=6	P13645	KRT10	58828.8	19	26	34	SKELTTEIDNNIEQISSYKSEITELR	K	R	0.982	40	25	15.5	40	0	0	0	1	2	3040.53	7389.73	5922330	344	369
Mudpit_Aged_L3_4Left_IAF	Keratin, type I cytoskeletal 10 OS=Homo sapiens GN=KRT10 PE=1 SV=6	P13645	KRT10	58828.8	19	26	34	SQYEQLAEQNRKDAEAWFNEK	R	S	0.997	65.2	25	17.1	65.2	0	1	2	0	2	2584.21	5440.45	26600000	323	343
Mudpit_Aged_L3_4Left_IAF	Keratin, type I cytoskeletal 10 OS=Homo sapiens GN=KRT10 PE=1 SV=6	P13645	KRT10	58828.8	19	26	34	TIDDLKNQILNLTTDNANILLQIDNAR	K	L	0.997	96.4	26.9	19	96.4	0	0	1	0	2	3052.63	9125.42	1946100	202	228
Mudpit_Aged_L3_4Left_IAF	Keratin, type I cytoskeletal 10 OS=Homo sapiens GN=KRT10 PE=1 SV=6	P13645	KRT10	58828.8	19	26	34	VLDELTLTK	R	A	0.997	57.7	25.3	18.9	55.4	0	1	0	0	2	1031.6	4703.36	9998020	258	266
Mudpit_Aged_L3_4Left_IAF	Keratin, type I cytoskeletal 10 OS=Homo sapiens GN=KRT10 PE=1 SV=6	P13645	KRT10	58828.8	19	26	34	VLDELTLTKADLEMQIESLTEELAYLKK	R	N	0.963	37.6	25	15.4	37.6	0	0	1	0	2	3252.72	9113.08	2422130	258	285
Mudpit_Aged_L3_4Left_IAF	Laminin, beta 2 (Laminin S), isoform CRA_a OS=Homo sapiens GN=LAMB2 PE=4 SV=1	A0A024R319,P55268	LAMB2	195976	6	9	9	ALAEGGSILSR	R	V	0.994	34.6	28	15.2	34.6	0	1	0	0	2	1073.6	3212.47	5276320	1466	1476
Mudpit_Aged_L3_4Left_IAF	Laminin, beta 2 (Laminin S), isoform CRA_a OS=Homo sapiens GN=LAMB2 PE=4 SV=1	A0A024R319,P55268	LAMB2	195976	6	9	9	AMDYDLLLR	K	L	0.997	40.8	25.7	20.7	35.7	0	2	0	0	2	1125.56	6103.75	17500000	618	626
Mudpit_Aged_L3_4Left_IAF	Laminin, beta 2 (Laminin S), isoform CRA_a OS=Homo sapiens GN=LAMB2 PE=4 SV=1	A0A024R319,P55268	LAMB2	195976	6	9	9	EIGEATEHLTQLEADLTDVQDENFNANHALSGLER	R	D	0.991	54	25	16.4	54	0	0	0	1	2	3879.83	8603.58	3115570	1268	1302
Mudpit_Aged_L3_4Left_IAF	Laminin, beta 2 (Laminin S), isoform CRA_a OS=Homo sapiens GN=LAMB2 PE=4 SV=1	A0A024R319,P55268	LAMB2	195976	6	9	9	GQVEQANQELQELIQSVK	R	D	0.997	101	27.4	19.3	101	0	1	1	0	2	2041.06	8655.79	12200000	1503	1520
Mudpit_Aged_L3_4Left_IAF	Laminin, beta 2 (Laminin S), isoform CRA_a OS=Homo sapiens GN=LAMB2 PE=4 SV=1	A0A024R319,P55268	LAMB2	195976	6	9	9	LHTLGDNLLDPR	R	R	0.995	48.7	26.6	17.2	47.5	0	1	1	0	2	1363.73	4549.79	11800000	252	263
Mudpit_Aged_L3_4Left_IAF	Laminin, beta 2 (Laminin S), isoform CRA_a OS=Homo sapiens GN=LAMB2 PE=4 SV=1	A0A024R319,P55268	LAMB2	195976	6	9	9	VLDPAIPIPDPYSSR	R	I	0.997	45.3	27	15.8	45.3	0	1	0	0	2	1639.87	7298.68	3268260	221	235
Mudpit_Aged_L3_4Left_IAF	Lysyl oxidase homolog 3 OS=Homo sapiens GN=LOXL3 PE=2 SV=1	P58215	LOXL3	83164.5	6	8	13	ELGFTEATGWTHSAK	R	Y	0.991	42.1	25	15.6	42.1	0	0	1	0	2	1634.78	4701.7	14700000	85	99
Mudpit_Aged_L3_4Left_IAF	Lysyl oxidase homolog 3 OS=Homo sapiens GN=LOXL3 PE=2 SV=1	P58215	LOXL3	83164.5	6	8	13	FSSQIHNLGR	R	A	0.994	50	27.2	16.1	50	0	0	2	0	2	1158.6	1458.66	18600000	580	589
Mudpit_Aged_L3_4Left_IAF	Lysyl oxidase homolog 3 OS=Homo sapiens GN=LOXL3 PE=2 SV=1	P58215	LOXL3	83164.5	6	8	13	LPGFSDSNVIEVEHHLQVEEVR	R	I	0.997	71.9	26.6	17.5	71.9	0	0	2	2	2	2533.27	6745.26	59600000	149	170
Mudpit_Aged_L3_4Left_IAF	Lysyl oxidase homolog 3 OS=Homo sapiens GN=LOXL3 PE=2 SV=1	P58215	LOXL3	83164.5	6	8	13	MGQGMGAIHLSEVR	R	C	0.997	58.4	25.3	16.7	19	0	0	3	0	2	1501.73	2945.85	12500000	362	375
Mudpit_Aged_L3_4Left_IAF	Lysyl oxidase homolog 3 OS=Homo sapiens GN=LOXL3 PE=2 SV=1	P58215	LOXL3	83164.5	6	8	13	RPLPVTEGLVEVR	R	L	0.997	63.2	25	16.9	63.2	0	0	2	0	2	1464.85	4382.66	16200000	180	192
Mudpit_Aged_L3_4Left_IAF	Lysyl oxidase homolog 3 OS=Homo sapiens GN=LOXL3 PE=2 SV=1	P58215	LOXL3	83164.5	6	8	13	VEVQIGGPGPLR	R	W	0.997	53.6	25	16.3	53.6	0	1	0	0	2	1221.7	4593.94	14200000	430	441
Mudpit_Aged_L3_4Left_IAF	cDNA, FLJ92374, highly similar to Homo sapiens C-type lectin domain family 3, member B (CLEC3B), mRNA OS=Homo sapiens PE=2 SV=1	B2R582		22537	4	7	17	GGTLSTPQTGSENDALYEYLR	R	Q	0.997	148	25.7	22.2	148	0	4	3	0	2	2272.07	6838.55	44600000	102	122
Mudpit_Aged_L3_4Left_IAF	cDNA, FLJ92374, highly similar to Homo sapiens C-type lectin domain family 3, member B (CLEC3B), mRNA OS=Homo sapiens PE=2 SV=1	B2R582		22537	4	7	17	LDTLAQEVALLK	R	E	0.997	81.2	25	18.1	81.2	0	3	1	0	2	1313.77	7254.32	67500000	51	62
Mudpit_Aged_L3_4Left_IAF	cDNA, FLJ92374, highly similar to Homo sapiens C-type lectin domain family 3, member B (CLEC3B), mRNA OS=Homo sapiens PE=2 SV=1	B2R582		22537	4	7	17	NWETEITAQPDGGK	K	T	0.997	57.4	25	16.6	57.4	0	2	2	0	2	1545.72	4718.86	45600000	156	169
Mudpit_Aged_L3_4Left_IAF	cDNA, FLJ92374, highly similar to Homo sapiens C-type lectin domain family 3, member B (CLEC3B), mRNA OS=Homo sapiens PE=2 SV=1	B2R582		22537	4	7	17	SRLDTLAQEVALLK	K	E	0.997	57	25.6	25	48.5	0	0	2	0	2	1556.9	6867.74	15600000	49	62
Mudpit_Aged_L3_4Left_IAF	Kininogen 1, isoform CRA_b OS=Homo sapiens GN=KNG1 PE=2 SV=1	B4E1C2,P01042	KNG1	71957.6	9	11	19	DFVQPPTK	K	I	0.968	30	29.2	14.9	30	0	1	0	0	2	931.489	2303.99	115000000	255	262
Mudpit_Aged_L3_4Left_IAF	Kininogen 1, isoform CRA_b OS=Homo sapiens GN=KNG1 PE=2 SV=1	B4E1C2,P01042	KNG1	71957.6	9	11	19	DIPTNSPELEETLTHTITK	R	L	0.997	87.8	27.1	18.5	87.8	0	3	3	0	2	2139.08	6632.14	133000000	270	288
Mudpit_Aged_L3_4Left_IAF	Kininogen 1, isoform CRA_b OS=Homo sapiens GN=KNG1 PE=2 SV=1	B4E1C2,P01042	KNG1	71957.6	9	11	19	IASFSQNCDIYPGK	R	D	0.997	59.7	25	16.7	59.7	0	1	0	0	2	1600.73	4964.55	5625560	241	254
Mudpit_Aged_L3_4Left_IAF	Kininogen 1, isoform CRA_b OS=Homo sapiens GN=KNG1 PE=2 SV=1	B4E1C2,P01042	KNG1	71957.6	9	11	19	LDDDLEHQGGHVLDHGHK	K	H	0.994	54.3	25.3	16.4	54.3	0	0	1	0	2	2021.94	1313.35	5198300	479	496
Mudpit_Aged_L3_4Left_IAF	Kininogen 1, isoform CRA_b OS=Homo sapiens GN=KNG1 PE=2 SV=1	B4E1C2,P01042	KNG1	71957.6	9	11	19	LGQSLDCNAEVYVVPWEK	K	K	0.997	88.5	25	18.5	88.5	0	1	0	0	2	2108	7935.23	1917730	345	362
Mudpit_Aged_L3_4Left_IAF	Kininogen 1, isoform CRA_b OS=Homo sapiens GN=KNG1 PE=2 SV=1	B4E1C2,P01042	KNG1	71957.6	9	11	19	QVVAGLNFR	R	I	0.997	48.2	26.8	16	48.2	0	2	0	0	2	1003.57	4373.04	19800000	188	196
Mudpit_Aged_L3_4Left_IAF	Kininogen 1, isoform CRA_b OS=Homo sapiens GN=KNG1 PE=2 SV=1	B4E1C2,P01042	KNG1	71957.6	9	11	19	SLWNGDTGECTDNAYIDIQLR	K	I	0.997	77.1	25	17.8	77.1	0	1	2	0	2	2442.09	8549.58	5793650	220	240
Mudpit_Aged_L3_4Left_IAF	Kininogen 1, isoform CRA_b OS=Homo sapiens GN=KNG1 PE=2 SV=1	B4E1C2,P01042	KNG1	71957.6	9	11	19	TVGSDTFYSFK	K	Y	0.997	69.1	26.1	17.3	69.1	0	2	0	0	2	1251.59	5043.4	85800000	65	75
Mudpit_Aged_L3_4Left_IAF	Kininogen 1, isoform CRA_b OS=Homo sapiens GN=KNG1 PE=2 SV=1	B4E1C2,P01042	KNG1	71957.6	9	11	19	YFIDFVAR	K	E	0.99	33.8	28.8	17.6	31.4	0	2	0	0	2	1030.54	6423.29	19900000	317	324
Mudpit_Aged_L3_4Left_IAF	Ras-related protein Rab-1A OS=Homo sapiens GN=RAB1A PE=1 SV=3	P62820,Q5U0I6,Q9H0U4	RAB1A,RAB1B	22678.5	2	3	4	FADDTYTESYISTIGVDFK	R	I	0.997	141	25	21.8	141	0	2	1	0	2	2172	8561.72	8988620	31	49
Mudpit_Aged_L3_4Left_IAF	Ras-related protein Rab-1A OS=Homo sapiens GN=RAB1A PE=1 SV=3	P62820,Q5U0I6,Q9H0U4	RAB1A,RAB1B	22678.5	2	3	4	LQIWDTAGQER	K	F	0.997	39.8	26.9	15.5	0	0	1	0	0	2	1316.66	4664.84	67400000	62	72
Mudpit_Aged_L3_4Left_IAF	Cadherin-1 OS=Homo sapiens GN=CDH1 PE=1 SV=1	A0A087WXI5,A0A0U2ZQU7,D3XNU5,P12830,Q9UII7	CDH1	97457.6	2	2	8	TAYFSLDTR	R	F	0.997	35.5	25	15.2	35.5	0	2	0	0	2	1073.53	4606.46	21400000	66	74
Mudpit_Aged_L3_4Left_IAF	Cadherin-1 OS=Homo sapiens GN=CDH1 PE=1 SV=1	A0A087WXI5,A0A0U2ZQU7,D3XNU5,P12830,Q9UII7	CDH1	97457.6	2	2	8	VGTDGVITVK	K	R	0.997	78.8	27.8	27.8	68.9	0	6	0	0	2	988.567	2521.55	47300000	77	86
Mudpit_Aged_L3_4Left_IAF	cDNA, FLJ95913, highly similar to Homo sapiens keratocan (KERA), mRNA OS=Homo sapiens PE=2 SV=1	B2RC89,O60938	KERA	40510.9	2	2	2	GFDVSSILDLQLSHNQLTK	R	V	0.969	35.4	27	15.2	35.4	0	0	1	0	2	2115.11	8457.08	4919720	258	276
Mudpit_Aged_L3_4Left_IAF	cDNA, FLJ95913, highly similar to Homo sapiens keratocan (KERA), mRNA OS=Homo sapiens PE=2 SV=1	B2RC89,O60938	KERA	40510.9	2	2	2	LVDNAFQR	K	D	0.99	49.5	27.2	16.1	49.5	0	1	0	0	2	962.505	2084.9	13400000	178	185
Mudpit_Aged_L3_4Left_IAF	Cystatin OS=Homo sapiens GN=HEL-S-2 PE=2 SV=1	A0A0K0K1J1,P01034	CST3,HEL-S-2	15799.2	2	3	5	ALDFAVGEYNK	R	A	0.997	52.7	25.8	32.2	36.8	0	1	0	0	2	1226.61	5086.1	14500000	52	62
Mudpit_Aged_L3_4Left_IAF	Cystatin OS=Homo sapiens GN=HEL-S-2 PE=2 SV=1	A0A0K0K1J1,P01034	CST3,HEL-S-2	15799.2	2	3	5	LVGGPMDASVEEEGVR	R	R	0.997	85.4	26.1	18.3	85.4	0	4	0	0	2	1644.79	3395.1	49400000	35	50
Mudpit_Aged_L3_4Left_IAF	Complement C5 OS=Homo sapiens GN=C5 PE=1 SV=4	P01031	C5	188309	37	56	99	ALLVGEHLNIIVTPK	K	S	0.997	45.1	25	15.8	45.1	0	1	1	0	2	1616.97	6168.25	16000000	475	489
Mudpit_Aged_L3_4Left_IAF	Complement C5 OS=Homo sapiens GN=C5 PE=1 SV=4	P01031	C5	188309	37	56	99	ALVEGVDQLFTDYQIK	K	D	0.997	112	26	20	112	0	4	2	0	2	1838.95	8724.48	28600000	1441	1456
Mudpit_Aged_L3_4Left_IAF	Complement C5 OS=Homo sapiens GN=C5 PE=1 SV=4	P01031	C5	188309	37	56	99	ATLLDIYK	K	T	0.99	39.9	25	31.6	23.8	0	2	0	0	2	936.54	5551.39	17200000	1579	1586
Mudpit_Aged_L3_4Left_IAF	Complement C5 OS=Homo sapiens GN=C5 PE=1 SV=4	P01031	C5	188309	37	56	99	DINYVNPVIK	K	W	0.994	35.8	27.7	16.6	34.5	0	3	0	0	2	1174.65	5250.99	40900000	1263	1272
Mudpit_Aged_L3_4Left_IAF	Complement C5 OS=Homo sapiens GN=C5 PE=1 SV=4	P01031	C5	188309	37	56	99	DSEITFIK	K	K	0.99	48.5	25.4	22.5	42	0	2	0	0	2	952.499	4731.85	26000000	1595	1602
Mudpit_Aged_L3_4Left_IAF	Complement C5 OS=Homo sapiens GN=C5 PE=1 SV=4	P01031	C5	188309	37	56	99	DSLDQLVGGVPVTLNAQTIDVNQETSDLDPSK	K	S	0.997	89.5	26	18.6	89.5	0	0	1	0	2	3368.67	9039.26	3491120	377	408
Mudpit_Aged_L3_4Left_IAF	Complement C5 OS=Homo sapiens GN=C5 PE=1 SV=4	P01031	C5	188309	37	56	99	DVFLEMNIPYSVVR	K	G	0.997	54.3	26.8	16.4	54.3	0	1	0	0	2	1697.86	7871.82	15000000	822	835
Mudpit_Aged_L3_4Left_IAF	Complement C5 OS=Homo sapiens GN=C5 PE=1 SV=4	P01031	C5	188309	37	56	99	EDFSTTGTAYFEVK	K	E	0.997	62.3	25	16.9	62.3	0	1	0	0	2	1594.73	6054.98	16800000	207	220
Mudpit_Aged_L3_4Left_IAF	Complement C5 OS=Homo sapiens GN=C5 PE=1 SV=4	P01031	C5	188309	37	56	99	EESSSGSSHAVMDISLPTGISANEEDLK	R	A	0.997	64.3	25	17	64.3	0	1	6	0	2	2890.33	5845.53	25000000	1413	1440
Mudpit_Aged_L3_4Left_IAF	Complement C5 OS=Homo sapiens GN=C5 PE=1 SV=4	P01031	C5	188309	37	56	99	EGMLSIMSYR	K	N	0.997	76.2	25	24.3	69.7	0	4	0	0	2	1186.56	6343.85	28800000	1051	1060
Mudpit_Aged_L3_4Left_IAF	Complement C5 OS=Homo sapiens GN=C5 PE=1 SV=4	P01031	C5	188309	37	56	99	ELSYYSLEDLNNK	K	Y	0.997	50.3	25.5	16.1	50.3	0	3	1	0	2	1587.75	6181.52	30400000	309	321
Mudpit_Aged_L3_4Left_IAF	Complement C5 OS=Homo sapiens GN=C5 PE=1 SV=4	P01031	C5	188309	37	56	99	ESYSGVTLDPR	R	G	0.996	34.1	26	15.1	34.1	0	1	0	0	2	1223.59	3582.54	13500000	937	947
Mudpit_Aged_L3_4Left_IAF	Complement C5 OS=Homo sapiens GN=C5 PE=1 SV=4	P01031	C5	188309	37	56	99	EYVLPHFSVSIEPEYNFIGYK	K	N	0.997	42.1	26	15.6	42.1	0	1	0	0	2	2531.25	8886.83	1506070	221	241
Mudpit_Aged_L3_4Left_IAF	Complement C5 OS=Homo sapiens GN=C5 PE=1 SV=4	P01031	C5	188309	37	56	99	FQNSAILTIQPK	K	Q	0.997	46	26.1	15.9	46	0	3	0	0	2	1359.76	4981.54	25600000	79	90
Mudpit_Aged_L3_4Left_IAF	Complement C5 OS=Homo sapiens GN=C5 PE=1 SV=4	P01031	C5	188309	37	56	99	FSDASYQSINIPVTQNMVPSSR	K	L	0.997	75.1	25.8	17.7	75.1	0	3	6	0	2	2441.18	6221.48	27200000	518	539
Mudpit_Aged_L3_4Left_IAF	Complement C5 OS=Homo sapiens GN=C5 PE=1 SV=4	P01031	C5	188309	37	56	99	FSYSSGHVHLSSENK	K	F	0.987	44.4	25	15.8	44.4	0	0	1	0	2	1678.78	1439.48	7801810	64	78
Mudpit_Aged_L3_4Left_IAF	Complement C5 OS=Homo sapiens GN=C5 PE=1 SV=4	P01031	C5	188309	37	56	99	GIYGTISR	R	R	0.99	36.2	25.1	15.3	36.2	0	1	0	0	2	866.473	2005.42	7867400	948	955
Mudpit_Aged_L3_4Left_IAF	Complement C5 OS=Homo sapiens GN=C5 PE=1 SV=4	P01031	C5	188309	37	56	99	IDTQDIEASHYR	K	G	0.997	85.8	25.1	18.6	85.5	0	1	2	0	2	1447.68	2351.17	26600000	1381	1392
Mudpit_Aged_L3_4Left_IAF	Complement C5 OS=Homo sapiens GN=C5 PE=1 SV=4	P01031	C5	188309	37	56	99	IPLDLVPK	R	T	0.99	31.8	25	15	31.8	0	2	0	0	2	894.566	5403.34	13500000	963	970
Mudpit_Aged_L3_4Left_IAF	Complement C5 OS=Homo sapiens GN=C5 PE=1 SV=4	P01031	C5	188309	37	56	99	ITHYNYLILSK	K	G	0.997	40.8	25	15.5	40.8	0	1	1	0	2	1364.76	4264.97	16100000	496	506
Mudpit_Aged_L3_4Left_IAF	Complement C5 OS=Homo sapiens GN=C5 PE=1 SV=4	P01031	C5	188309	37	56	99	LQGTLPVEAR	K	E	0.997	54.4	25	16.4	54.4	0	2	0	0	2	1083.62	2759.98	89300000	1129	1138
Mudpit_Aged_L3_4Left_IAF	Complement C5 OS=Homo sapiens GN=C5 PE=1 SV=4	P01031	C5	188309	37	56	99	LSMDIDVSYK	R	H	0.997	59.2	25.5	16.7	59.2	0	4	0	0	2	1170.57	3474.11	35900000	1309	1318
Mudpit_Aged_L3_4Left_IAF	Complement C5 OS=Homo sapiens GN=C5 PE=1 SV=4	P01031	C5	188309	37	56	99	MPITYDNGFLFIHTDKPVYTPDQSVK	R	V	0.992	54.9	25.6	16.4	54.9	0	0	0	2	2	3026.5	7219.5	11300000	117	142
Mudpit_Aged_L3_4Left_IAF	Complement C5 OS=Homo sapiens GN=C5 PE=1 SV=4	P01031	C5	188309	37	56	99	MSAVEGICTSESPVIDHQGTK	K	S	0.997	92.7	31	18.8	92.7	0	2	0	0	2	2247.03	3796.97	8694880	859	879
Mudpit_Aged_L3_4Left_IAF	Complement C5 OS=Homo sapiens GN=C5 PE=1 SV=4	P01031	C5	188309	37	56	99	MVETTAYALLTSLNLK	R	D	0.997	73.1	25.9	17.6	73.1	0	0	1	0	2	1783.95	8877.46	14700000	1247	1262
Mudpit_Aged_L3_4Left_IAF	Complement C5 OS=Homo sapiens GN=C5 PE=1 SV=4	P01031	C5	188309	37	56	99	NADYSYSVWK	R	G	0.997	41.1	25	15.6	41.1	0	3	0	0	2	1232.56	4534.41	37700000	1061	1070
Mudpit_Aged_L3_4Left_IAF	Complement C5 OS=Homo sapiens GN=C5 PE=1 SV=4	P01031	C5	188309	37	56	99	QLPGGQNPVSYVYLEVVSK	K	H	0.997	82.6	26.3	18.2	82.6	0	3	2	0	2	2077.1	8627.02	30300000	91	109
Mudpit_Aged_L3_4Left_IAF	Complement C5 OS=Homo sapiens GN=C5 PE=1 SV=4	P01031	C5	188309	37	56	99	QTACKPEIAYAYK	K	V	0.997	49.6	25	16.1	49.6	0	1	0	0	2	1543.75	1920.99	2897350	1550	1562
Mudpit_Aged_L3_4Left_IAF	Complement C5 OS=Homo sapiens GN=C5 PE=1 SV=4	P01031	C5	188309	37	56	99	RESYSGVTLDPR	K	G	0.991	43.7	27	16.5	42.9	0	0	1	0	2	1379.69	2134.59	4800130	936	947
Mudpit_Aged_L3_4Left_IAF	Complement C5 OS=Homo sapiens GN=C5 PE=1 SV=4	P01031	C5	188309	37	56	99	SYFPESWLWEVHLVPR	R	R	0.995	51.7	26.2	16.2	51.7	0	0	1	0	2	2045.03	8944.81	8959530	767	782
Mudpit_Aged_L3_4Left_IAF	Complement C5 OS=Homo sapiens GN=C5 PE=1 SV=4	P01031	C5	188309	37	56	99	TDAPDLPEENQAR	K	E	0.997	52.3	25	16.3	52.3	0	3	1	0	2	1455.67	2395.13	122000000	437	449
Mudpit_Aged_L3_4Left_IAF	Complement C5 OS=Homo sapiens GN=C5 PE=1 SV=4	P01031	C5	188309	37	56	99	TGEAVAEKDSEITFIK	K	K	0.997	106	26.8	19.6	106	0	1	1	0	2	1737.89	4155.45	22900000	1587	1602
Mudpit_Aged_L3_4Left_IAF	Complement C5 OS=Homo sapiens GN=C5 PE=1 SV=4	P01031	C5	188309	37	56	99	TLLPVSKPEIR	K	S	0.989	41.4	25	15.6	41.4	0	0	3	0	2	1252.76	3608.7	34000000	756	766
Mudpit_Aged_L3_4Left_IAF	Complement C5 OS=Homo sapiens GN=C5 PE=1 SV=4	P01031	C5	188309	37	56	99	VSITSITVENVFVK	K	Y	0.997	98.7	25	28.5	89.3	0	2	2	0	2	1535.87	7632.25	17800000	1563	1576
Mudpit_Aged_L3_4Left_IAF	Complement C5 OS=Homo sapiens GN=C5 PE=1 SV=4	P01031	C5	188309	37	56	99	VTCTNAELVK	K	G	0.97	28.2	26.7	22.9	20	0	1	0	0	2	1135.57	1768.54	5127340	1604	1613
Mudpit_Aged_L3_4Left_IAF	Complement C5 OS=Homo sapiens GN=C5 PE=1 SV=4	P01031	C5	188309	37	56	99	VYSLNDDLKPAK	R	R	0.997	51.3	27	16.2	51.3	0	1	3	0	2	1362.73	2626.1	49300000	145	156
Mudpit_Aged_L3_4Left_IAF	Complement C5 OS=Homo sapiens GN=C5 PE=1 SV=4	P01031	C5	188309	37	56	99	YGGGFYSTQDTINAIEGLTEYSLLVK	R	Q	0.997	98.4	26	19.1	98.4	0	1	2	0	2	2839.4	9209.06	11500000	1280	1305
Mudpit_Aged_L3_4Left_IAF	Tetraspanin OS=Homo sapiens GN=CD9 PE=1 SV=1	A6NNI4,B4DPP0,G8JLH6,P21926	CD9	25417	2	3	4	DVLETFTVK	K	S	0.997	37.4	25.4	15.3	37.4	0	2	0	0	2	1051.57	5890.4	16600000	171	179
Mudpit_Aged_L3_4Left_IAF	Tetraspanin OS=Homo sapiens GN=CD9 PE=1 SV=1	A6NNI4,B4DPP0,G8JLH6,P21926	CD9	25417	2	3	4	KDVLETFTVK	K	S	0.997	76.8	25.2	19.9	74.7	0	1	1	0	2	1179.66	4293.31	10200000	170	179
Mudpit_Aged_L3_4Left_IAF	Protein S isoform 1 (Fragment) OS=Homo sapiens GN=PROS1 PE=2 SV=1	A0A0S2Z4K3,A0A0S2Z4L3,P07225,Q16519,Q9NSD0	PROS1	75123.4	7	8	9	FSAEFDFR	R	T	0.99	40.3	25	15.6	40.2	0	1	0	0	2	1018.46	5600.82	7593230	323	330
Mudpit_Aged_L3_4Left_IAF	Protein S isoform 1 (Fragment) OS=Homo sapiens GN=PROS1 PE=2 SV=1	A0A0S2Z4K3,A0A0S2Z4L3,P07225,Q16519,Q9NSD0	PROS1	75123.4	7	8	9	IETISHEDLQR	K	Q	0.997	57.5	26.5	16.6	57.5	0	1	1	0	2	1340.68	1567.76	57400000	592	602
Mudpit_Aged_L3_4Left_IAF	Protein S isoform 1 (Fragment) OS=Homo sapiens GN=PROS1 PE=2 SV=1	A0A0S2Z4K3,A0A0S2Z4L3,P07225,Q16519,Q9NSD0	PROS1	75123.4	7	8	9	ITTGGDVINNGLWNMVSVEELEHSISIK	K	I	0.996	54.5	25.9	16.4	54.5	0	0	1	0	2	3055.54	9020.46	2859360	371	398
Mudpit_Aged_L3_4Left_IAF	Protein S isoform 1 (Fragment) OS=Homo sapiens GN=PROS1 PE=2 SV=1	A0A0S2Z4K3,A0A0S2Z4L3,P07225,Q16519,Q9NSD0	PROS1	75123.4	7	8	9	NNLELSTPLK	R	I	0.997	51.7	27.6	16.2	51.7	0	2	0	0	2	1128.63	4122.01	12400000	582	591
Mudpit_Aged_L3_4Left_IAF	Protein S isoform 1 (Fragment) OS=Homo sapiens GN=PROS1 PE=2 SV=1	A0A0S2Z4K3,A0A0S2Z4L3,P07225,Q16519,Q9NSD0	PROS1	75123.4	7	8	9	QSTNAYPDLR	R	S	0.997	49.8	26.9	19.4	46.5	0	1	0	0	2	1164.56	2000.24	16100000	102	111
Mudpit_Aged_L3_4Left_IAF	Protein S isoform 1 (Fragment) OS=Homo sapiens GN=PROS1 PE=2 SV=1	A0A0S2Z4K3,A0A0S2Z4L3,P07225,Q16519,Q9NSD0	PROS1	75123.4	7	8	9	SFQTGLFTAAR	R	Q	0.997	58.6	25	19.4	55.8	0	1	0	0	2	1198.62	5164.41	13300000	91	101
Mudpit_Aged_L3_4Left_IAF	Protein S isoform 1 (Fragment) OS=Homo sapiens GN=PROS1 PE=2 SV=1	A0A0S2Z4K3,A0A0S2Z4L3,P07225,Q16519,Q9NSD0	PROS1	75123.4	7	8	9	SQDILLSVENTVIYR	K	I	0.997	66.2	26.7	17.1	66.2	0	1	0	0	2	1749.94	8346.6	2397650	547	561
Mudpit_Aged_L3_4Left_IAF	Alpha-2-macroglobulin OS=Homo sapiens GN=A2M PE=1 SV=3	P01023	A2M	163290	39	69	225	AAQVTIQSSGTFSSK	K	F	0.997	71.2	26.4	17.5	71.2	0	8	0	0	2	1511.77	2930.78	25700000	1275	1289
Mudpit_Aged_L3_4Left_IAF	Alpha-2-macroglobulin OS=Homo sapiens GN=A2M PE=1 SV=3	P01023	A2M	163290	39	69	225	AIGYLNTGYQR	K	Q	0.997	43.5	26	15.7	43.5	0	2	0	0	2	1255.64	3681.22	19000000	1004	1014
Mudpit_Aged_L3_4Left_IAF	Alpha-2-macroglobulin OS=Homo sapiens GN=A2M PE=1 SV=3	P01023	A2M	163290	39	69	225	ATVLNYLPK	K	C	0.997	48.4	25	35.2	29.2	0	5	0	0	2	1018.59	5296.43	210000000	812	820
Mudpit_Aged_L3_4Left_IAF	Alpha-2-macroglobulin OS=Homo sapiens GN=A2M PE=1 SV=3	P01023	A2M	163290	39	69	225	AVDQSVLLMKPDAELSASSVYNLLPEK	R	D	0.997	89.1	27.6	18.6	89.1	0	1	8	3	2	2917.52	8822.96	60300000	599	625
Mudpit_Aged_L3_4Left_IAF	Alpha-2-macroglobulin OS=Homo sapiens GN=A2M PE=1 SV=3	P01023	A2M	163290	39	69	225	DLTGFPGPLNDQDNEDCINR	K	H	0.997	83.5	25	18.2	83.5	0	6	3	0	2	2290.99	7396.63	70000000	626	645
Mudpit_Aged_L3_4Left_IAF	Alpha-2-macroglobulin OS=Homo sapiens GN=A2M PE=1 SV=3	P01023	A2M	163290	39	69	225	DMYSFLEDMGLK	K	A	0.997	68.4	25	17.3	68.4	0	17	0	0	2	1464.64	8223.29	509000000	665	676
Mudpit_Aged_L3_4Left_IAF	Alpha-2-macroglobulin OS=Homo sapiens GN=A2M PE=1 SV=3	P01023	A2M	163290	39	69	225	DTVIKPLLVEPEGLEK	K	E	0.997	67	25	17.2	67	0	4	5	0	2	1780.01	6414.48	271000000	897	912
Mudpit_Aged_L3_4Left_IAF	Alpha-2-macroglobulin OS=Homo sapiens GN=A2M PE=1 SV=3	P01023	A2M	163290	39	69	225	ETTFNSLLCPSGGEVSEELSLK	K	L	0.997	81.8	25.9	18.1	81.8	0	2	1	0	2	2398.13	8716.19	20200000	913	934
Mudpit_Aged_L3_4Left_IAF	Alpha-2-macroglobulin OS=Homo sapiens GN=A2M PE=1 SV=3	P01023	A2M	163290	39	69	225	FEVQVTVPK	K	I	0.997	47.8	27.8	16	47.8	0	3	0	0	2	1046.59	4762.65	98000000	229	237
Mudpit_Aged_L3_4Left_IAF	Alpha-2-macroglobulin OS=Homo sapiens GN=A2M PE=1 SV=3	P01023	A2M	163290	39	69	225	FSGQLNSHGCFYQQVK	K	T	0.963	35.3	25	15.2	35.3	0	0	1	0	2	1900.86	3968.85	5588880	290	305
Mudpit_Aged_L3_4Left_IAF	Alpha-2-macroglobulin OS=Homo sapiens GN=A2M PE=1 SV=3	P01023	A2M	163290	39	69	225	GHFSISIPVK	K	S	0.997	56.6	25	19.4	53.7	0	3	3	0	2	1084.62	4181.56	41600000	522	531
Mudpit_Aged_L3_4Left_IAF	Alpha-2-macroglobulin OS=Homo sapiens GN=A2M PE=1 SV=3	P01023	A2M	163290	39	69	225	HYDGSYSTFGER	K	Y	0.997	59	25	16.7	59	0	5	0	0	2	1418.6	1780.75	37900000	1020	1031
Mudpit_Aged_L3_4Left_IAF	Alpha-2-macroglobulin OS=Homo sapiens GN=A2M PE=1 SV=3	P01023	A2M	163290	39	69	225	IAQWQSFQLEGGLK	R	Q	0.997	88.8	32.7	18.5	88.8	0	2	0	0	2	1604.84	6726.56	102000000	175	188
Mudpit_Aged_L3_4Left_IAF	Alpha-2-macroglobulin OS=Homo sapiens GN=A2M PE=1 SV=3	P01023	A2M	163290	39	69	225	LHTEAQIQEEGTVVELTGR	K	Q	0.997	136	25.6	21.5	136	0	4	12	0	2	2110.08	4845.03	104000000	320	338
Mudpit_Aged_L3_4Left_IAF	Alpha-2-macroglobulin OS=Homo sapiens GN=A2M PE=1 SV=3	P01023	A2M	163290	39	69	225	LLIYAVLPTGDVIGDSAK	R	Y	0.997	72.3	25	18.4	71.4	0	3	3	0	2	1845.04	8850.42	104000000	540	557
Mudpit_Aged_L3_4Left_IAF	Alpha-2-macroglobulin OS=Homo sapiens GN=A2M PE=1 SV=3	P01023	A2M	163290	39	69	225	LLLQQVSLPELPGEYSMK	R	V	0.997	71.2	26.1	17.5	71.2	0	7	3	0	2	2045.1	8854.93	448000000	1298	1315
Mudpit_Aged_L3_4Left_IAF	Alpha-2-macroglobulin OS=Homo sapiens GN=A2M PE=1 SV=3	P01023	A2M	163290	39	69	225	LPPNVVEESAR	K	A	0.997	62	28.5	16.9	62	0	8	0	0	2	1210.64	2610.18	852000000	935	945
Mudpit_Aged_L3_4Left_IAF	Alpha-2-macroglobulin OS=Homo sapiens GN=A2M PE=1 SV=3	P01023	A2M	163290	39	69	225	LVHVEEPHTETVR	R	K	0.997	47.6	27.1	16	47.6	0	1	1	4	2	1545.8	1285.08	53400000	720	732
Mudpit_Aged_L3_4Left_IAF	Alpha-2-macroglobulin OS=Homo sapiens GN=A2M PE=1 SV=3	P01023	A2M	163290	39	69	225	NALFCLESAWK	R	T	0.996	36.8	29.7	15.3	36.8	0	2	0	0	2	1339.64	9008.03	25800000	1123	1133
Mudpit_Aged_L3_4Left_IAF	Alpha-2-macroglobulin OS=Homo sapiens GN=A2M PE=1 SV=3	P01023	A2M	163290	39	69	225	NEDSLVFVQTDK	K	S	0.997	73.6	26.5	27.6	63.6	0	3	0	0	2	1394.68	4780.46	27400000	124	135
Mudpit_Aged_L3_4Left_IAF	Alpha-2-macroglobulin OS=Homo sapiens GN=A2M PE=1 SV=3	P01023	A2M	163290	39	69	225	QFSFPLSSEPFQGSYK	K	V	0.997	112	25.6	20	112	0	5	2	0	2	1848.88	7590.43	95100000	189	204
Mudpit_Aged_L3_4Left_IAF	Alpha-2-macroglobulin OS=Homo sapiens GN=A2M PE=1 SV=3	P01023	A2M	163290	39	69	225	QGIPFFGQVR	R	L	0.976	26.6	26.1	15.9	25.4	0	1	0	0	2	1148.62	6468.71	5674090	361	370
Mudpit_Aged_L3_4Left_IAF	Alpha-2-macroglobulin OS=Homo sapiens GN=A2M PE=1 SV=3	P01023	A2M	163290	39	69	225	QQNAQGGFSSTQDTVVALHALSK	K	Y	0.997	124	27.3	20.7	124	0	4	5	0	2	2387.2	5397.69	59200000	1241	1263
Mudpit_Aged_L3_4Left_IAF	Alpha-2-macroglobulin OS=Homo sapiens GN=A2M PE=1 SV=3	P01023	A2M	163290	39	69	225	QTVSWAVTPK	R	S	0.997	78.2	27.2	17.9	78.2	0	4	0	0	2	1116.6	3504.75	30200000	854	863
Mudpit_Aged_L3_4Left_IAF	Alpha-2-macroglobulin OS=Homo sapiens GN=A2M PE=1 SV=3	P01023	A2M	163290	39	69	225	SASNMAIVDVK	R	M	0.997	76.3	27	17.8	76.3	0	5	0	0	2	1134.58	3087.3	31100000	1374	1384
Mudpit_Aged_L3_4Left_IAF	Alpha-2-macroglobulin OS=Homo sapiens GN=A2M PE=1 SV=3	P01023	A2M	163290	39	69	225	SLFTDLEAENDVLHCVAFAVPK	R	S	0.997	37.9	25.8	15.4	37.9	0	1	0	0	2	2476.21	8976.8	4920230	72	93
Mudpit_Aged_L3_4Left_IAF	Alpha-2-macroglobulin OS=Homo sapiens GN=A2M PE=1 SV=3	P01023	A2M	163290	39	69	225	SPCYGYQWVSEEHEEAHHTAYLVFSPSK	R	S	0.98	58.1	25	16.6	58.1	0	0	2	0	2	3339.47	5876.89	5368470	429	456
Mudpit_Aged_L3_4Left_IAF	Alpha-2-macroglobulin OS=Homo sapiens GN=A2M PE=1 SV=3	P01023	A2M	163290	39	69	225	SSGSLLNNAIK	R	G	0.997	74.8	27.5	17.7	74.8	0	5	0	0	2	1103.61	2948.45	102000000	1082	1092
Mudpit_Aged_L3_4Left_IAF	Alpha-2-macroglobulin OS=Homo sapiens GN=A2M PE=1 SV=3	P01023	A2M	163290	39	69	225	SSSNEEVMFLTVQVK	K	G	0.997	115	25.9	20.2	115	0	8	2	0	2	1713.84	6347.23	72700000	94	108
Mudpit_Aged_L3_4Left_IAF	Alpha-2-macroglobulin OS=Homo sapiens GN=A2M PE=1 SV=3	P01023	A2M	163290	39	69	225	TEHPFTVEEFVLPK	R	F	0.997	50.8	26.8	16.2	50.8	0	2	3	0	2	1672.86	6474.03	293000000	215	228
Mudpit_Aged_L3_4Left_IAF	Alpha-2-macroglobulin OS=Homo sapiens GN=A2M PE=1 SV=3	P01023	A2M	163290	39	69	225	TEVSSNHVLIYLDK	R	V	0.997	85.5	27.9	18.3	85.5	0	2	4	0	2	1617.85	4559.83	95600000	1408	1421
Mudpit_Aged_L3_4Left_IAF	Alpha-2-macroglobulin OS=Homo sapiens GN=A2M PE=1 SV=3	P01023	A2M	163290	39	69	225	VDLSFSPSQSLPASHAHLR	K	V	0.997	102	26.4	19.4	102	0	1	4	3	2	2049.05	4740.21	103000000	568	586
Mudpit_Aged_L3_4Left_IAF	Alpha-2-macroglobulin OS=Homo sapiens GN=A2M PE=1 SV=3	P01023	A2M	163290	39	69	225	VGFYESDVMGR	R	G	0.997	71.4	25	17.9	71	0	9	0	0	2	1259.57	4252.11	140000000	705	715
Mudpit_Aged_L3_4Left_IAF	Alpha-2-macroglobulin OS=Homo sapiens GN=A2M PE=1 SV=3	P01023	A2M	163290	39	69	225	VSVQLEASPAFLAVPVEK	R	E	0.997	79.7	25	18	79.7	0	4	4	0	2	1884.05	7818.53	201000000	824	841
Mudpit_Aged_L3_4Left_IAF	Alpha-2-macroglobulin OS=Homo sapiens GN=A2M PE=1 SV=3	P01023	A2M	163290	39	69	225	VVSMDENFHPLNELIPLVYIQDPK	R	G	0.997	61.9	25.3	16.9	61.9	0	4	2	0	2	2810.44	8948.94	335000000	148	171
Mudpit_Aged_L3_4Left_IAF	Alpha-2-macroglobulin OS=Homo sapiens GN=A2M PE=1 SV=3	P01023	A2M	163290	39	69	225	VYDYYETDEFAIAEYNAPCSK	K	D	0.951	36.5	25	15.3	36.5	0	1	0	0	2	2549.07	7528.9	1798200	1449	1469
[truncated: 14,080 more rows]
