# Supplementary material for: Peptide Location Fingerprinting Reveals Tissue Region-specific Differences in Protein Structures in an Ageing Human Organ
Source: Preprints.org preprint supplement (doi:10.20944/preprints202107.0670.v1), 2021-07-29
Supplement: Supplementary file 3 [file Table S3_Peptide Report for Anterior inner AF.xlsx]

## Sheet: Peptide Report for Anterior IAF
Table S3: MS/MS-identified peptides and protein in young and aged anterior inner AF
MS/MS sample name	Protein name	Uniprot accession numbers	Alternate IDs	Protein molecular weight (Da)	Exclusive unique peptide count	Exclusive unique spectrum count	Exclusive spectrum count	Peptide sequence	Previous amino acid	Next amino acid	Best Peptide identification probability	Best Mascot Ion Score	Best Mascot Identity Score	Best Mascot Homology Score	Best Mascot Delta Ion Score	Number of identified +1H spectra	Number of identified +2H spectra	Number of identified +3H spectra	Number of identified +4H spectra	Number of enzymatic termini	Calculated +1H Peptide Mass (AMU)	Median Retention Time	Total TIC	Peptide start index	Peptide stop index
Mudpit_Aged L3 4 Anterior NP IAF	Prelamin-A/C OS=Homo sapiens GN=LMNA PE=1 SV=1	P02545	LMNA	74140.7	7	7	9	DLEALLNSK	K	E	0.988	34.5	28.5	15.2	34.5	0	1	0	0	2	1002.55	7009.07	6711720	136	144
Mudpit_Aged L3 4 Anterior NP IAF	Prelamin-A/C OS=Homo sapiens GN=LMNA PE=1 SV=1	P02545	LMNA	74140.7	7	7	9	EDLQELNDR	K	L	0.997	36.9	25	15.3	36.9	0	1	0	0	2	1131.53	3241.1	4414660	33	41
Mudpit_Aged L3 4 Anterior NP IAF	Prelamin-A/C OS=Homo sapiens GN=LMNA PE=1 SV=1	P02545	LMNA	74140.7	7	7	9	ITESEEVVSR	R	E	0.997	50.9	27.4	16.2	50.9	0	1	0	0	2	1148.58	2543.96	7376530	63	72
Mudpit_Aged L3 4 Anterior NP IAF	Prelamin-A/C OS=Homo sapiens GN=LMNA PE=1 SV=1	P02545	LMNA	74140.7	7	7	9	LEAALGEAK	K	K	0.997	47.4	27.7	27.1	36.3	0	1	0	0	2	901.499	2899.09	5786400	172	180
Mudpit_Aged L3 4 Anterior NP IAF	Prelamin-A/C OS=Homo sapiens GN=LMNA PE=1 SV=1	P02545	LMNA	74140.7	7	7	9	LRDLEDSLAR	K	E	0.956	43.1	27.7	26.3	32.5	0	0	1	0	2	1187.64	6285.11	3725890	320	329
Mudpit_Aged L3 4 Anterior NP IAF	Prelamin-A/C OS=Homo sapiens GN=LMNA PE=1 SV=1	P02545	LMNA	74140.7	7	7	9	SLETENAGLR	R	L	0.997	48.1	27.7	16	48.1	0	3	0	0	2	1089.55	2861.03	16115500	51	60
Mudpit_Aged L3 4 Anterior NP IAF	Prelamin-A/C OS=Homo sapiens GN=LMNA PE=1 SV=1	P02545	LMNA	74140.7	7	7	9	VAVEEVDEEGK	R	F	0.997	63.8	25	17	63.8	0	1	0	0	2	1203.57	2661.32	3756450	440	450
Mudpit_Aged L3 4 Anterior NP IAF	Vitamin D-binding protein OS=Homo sapiens GN=GC PE=1 SV=1	D6RF35	GC	53021.2	8	12	58	ELSSFIDK	K	G	0.99	49	25.8	18.6	46.4	0	3	0	0	2	938.483	4793.99	74691600	395	402
Mudpit_Aged L3 4 Anterior NP IAF	Vitamin D-binding protein OS=Homo sapiens GN=GC PE=1 SV=1	D6RF35	GC	53021.2	8	12	58	ELSSFIDKGQELCADYSENTFTEYK	K	K	0.985	73.7	25	17.6	73.7	0	0	1	0	2	2975.31	8930.41	4988020	395	419
Mudpit_Aged L3 4 Anterior NP IAF	Vitamin D-binding protein OS=Homo sapiens GN=GC PE=1 SV=1	D6RF35	GC	53021.2	8	12	58	FPSGTFEQVSQLVK	K	E	0.997	98.3	27	19.8	97.7	0	6	0	0	2	1566.82	8808.49	98573800	52	65
Mudpit_Aged L3 4 Anterior NP IAF	Vitamin D-binding protein OS=Homo sapiens GN=GC PE=1 SV=1	D6RF35	GC	53021.2	8	12	58	HLSLLTTLSNR	K	V	0.997	51	26.7	16.2	51	0	2	2	0	2	1254.72	8082.81	69711500	208	218
Mudpit_Aged L3 4 Anterior NP IAF	Vitamin D-binding protein OS=Homo sapiens GN=GC PE=1 SV=1	D6RF35	GC	53021.2	8	12	58	KELSSFIDK	K	G	0.997	52.6	26.4	35.3	33.6	0	4	3	0	2	1066.58	6414.08	56424000	394	402
Mudpit_Aged L3 4 Anterior NP IAF	Vitamin D-binding protein OS=Homo sapiens GN=GC PE=1 SV=1	D6RF35	GC	53021.2	8	12	58	LPDATPTELAK	K	L	0.997	54.2	25	16.4	0	0	6	0	0	2	1155.63	4582.98	56518700	430	440
Mudpit_Aged L3 4 Anterior NP IAF	Vitamin D-binding protein OS=Homo sapiens GN=GC PE=1 SV=1	D6RF35	GC	53021.2	8	12	58	THLPEVFLSK	R	V	0.997	55.4	25.1	16.5	55.4	0	4	5	0	2	1170.65	9133.7	86736000	354	363
Mudpit_Aged L3 4 Anterior NP IAF	Vitamin D-binding protein OS=Homo sapiens GN=GC PE=1 SV=1	D6RF35	GC	53021.2	8	12	58	VPTADLEDVLPLAEDITNILSK	K	C	0.997	103	25	19.4	103	0	11	11	0	2	2366.27	9814.54	47475600	243	264
Mudpit_Aged L3 4 Anterior NP IAF	Epididymis luminal protein 4 OS=Homo sapiens GN=YWHAZ PE=2 SV=1	D0PNI1,P63104	YWHAZ	27745.9	3	3	7	DSTLIMQLLR	K	D	0.997	44.7	26.2	17.4	43.1	0	1	0	0	2	1189.66	9258	15137500	213	222
Mudpit_Aged L3 4 Anterior NP IAF	Epididymis luminal protein 4 OS=Homo sapiens GN=YWHAZ PE=2 SV=1	D0PNI1,P63104	YWHAZ	27745.9	3	3	7	GIVDQSQQAYQEAFEISK	K	K	0.997	112	25.2	20	112	0	3	0	0	2	2040.99	8088.9	14934000	140	157
Mudpit_Aged L3 4 Anterior NP IAF	Epididymis luminal protein 4 OS=Homo sapiens GN=YWHAZ PE=2 SV=1	D0PNI1,P63104	YWHAZ	27745.9	3	3	7	NLLSVAYK	R	N	0.99	34.6	25.4	31	18.8	0	1	0	0	2	907.525	6159.72	9087410	42	49
Mudpit_Aged L3 4 Anterior NP IAF	Epididymis luminal protein 4 OS=Homo sapiens GN=YWHAZ PE=2 SV=1	D0PNI1,P63104	YWHAZ	27745.9	3	3	7	TAFDEAIAELDTLSEESYK	K	D	0.995	71.1	28	17.4	71.1	0	0	2	0	2	2131.99	9388	15821500	194	212
Mudpit_Aged L3 4 Anterior NP IAF	Epididymis luminal protein 4 OS=Homo sapiens GN=YWHAZ PE=2 SV=1	D0PNI1,P63104	YWHAZ	27745.9	3	3	7	YLAEVAAGDDK	R	K	0.997	45.4	26.1	15.8	45.4	0	2	0	0	2	1151.56	3554.53	10275500	128	138
Mudpit_Aged L3 4 Anterior NP IAF	cDNA FLJ14473 fis, clone MAMMA1001080, highly similar to Homo sapiens SNC73 protein (SNC73) mRNA OS=Homo sapiens PE=2 SV=1	Q96K68		53087.4	5	6	30	DASGVTFTWTPSSGK	R	S	0.997	89.6	26.2	18.6	89.6	0	4	0	0	2	1540.73	6885.62	54359600	295	309
Mudpit_Aged L3 4 Anterior NP IAF	cDNA FLJ14473 fis, clone MAMMA1001080, highly similar to Homo sapiens SNC73 protein (SNC73) mRNA OS=Homo sapiens PE=2 SV=1	Q96K68		53087.4	5	6	30	GLEWVSSISSR	K	S	0.993	39.1	28.4	15.4	39.1	0	1	0	0	2	1220.63	7363.56	3102080	63	73
Mudpit_Aged L3 4 Anterior NP IAF	cDNA FLJ14473 fis, clone MAMMA1001080, highly similar to Homo sapiens SNC73 protein (SNC73) mRNA OS=Homo sapiens PE=2 SV=1	Q96K68		53087.4	5	6	30	NSLYLQMNSLR	K	V	0.997	37.8	26.9	41.6	11.6	0	2	0	0	2	1338.68	6720.29	6887140	96	106
Mudpit_Aged L3 4 Anterior NP IAF	cDNA FLJ14473 fis, clone MAMMA1001080, highly similar to Homo sapiens SNC73 protein (SNC73) mRNA OS=Homo sapiens PE=2 SV=1	Q96K68		53087.4	5	6	30	QEPSQGTTTFAVTSILR	R	V	0.997	111	27.2	20	111	0	12	4	0	2	1835.95	8636.23	356488000	424	440
Mudpit_Aged L3 4 Anterior NP IAF	cDNA FLJ14473 fis, clone MAMMA1001080, highly similar to Homo sapiens SNC73 protein (SNC73) mRNA OS=Homo sapiens PE=2 SV=1	Q96K68		53087.4	5	6	30	TPLTATLSK	K	S	0.997	62.9	26.3	20.7	59.1	0	4	0	0	2	931.546	3893.19	144344000	354	362
Mudpit_Aged L3 4 Anterior NP IAF	cDNA FLJ14473 fis, clone MAMMA1001080, highly similar to Homo sapiens SNC73 protein (SNC73) mRNA OS=Homo sapiens PE=2 SV=1	Q96K68		53087.4	5	6	30	WLQGSQELPR	R	E	0.997	56.7	26.4	16.5	56.7	0	5	0	0	2	1213.63	5846.97	494697000	405	414
Mudpit_Aged L3 4 Anterior NP IAF	Keratin, type II cytoskeletal 2 epidermal OS=Homo sapiens GN=KRT2 PE=1 SV=2	P35908	KRT2	65433.9	3	3	3	FASFIDKVR	K	F	0.961	31.9	25	32.6	14.3	0	0	1	0	2	1082.6	6413.53	12626600	189	197
Mudpit_Aged L3 4 Anterior NP IAF	Keratin, type II cytoskeletal 2 epidermal OS=Homo sapiens GN=KRT2 PE=1 SV=2	P35908	KRT2	65433.9	3	3	3	FLEQQNQVLQTK	R	W	0.997	80.8	32.2	18.1	80.8	0	1	0	0	2	1475.79	4557.13	7888010	198	209
Mudpit_Aged L3 4 Anterior NP IAF	Keratin, type II cytoskeletal 2 epidermal OS=Homo sapiens GN=KRT2 PE=1 SV=2	P35908	KRT2	65433.9	3	3	3	GFSSGSAVVSGGSR	R	R	0.997	76.5	25.1	17.8	76.5	0	1	0	0	2	1254.61	3127.27	3085860	21	34
Mudpit_Aged L3 4 Anterior NP IAF	Keratin, type II cytoskeletal 2 epidermal OS=Homo sapiens GN=KRT2 PE=1 SV=2	P35908	KRT2	65433.9	3	3	3	GGSGGGGSISGGGYGSGGGSGGR	R	Y	0.997	108	25	19.7	108	0	1	0	0	2	1741.75	2087.93	148713	550	572
Mudpit_Aged L3 4 Anterior NP IAF	Keratin, type II cytoskeletal 2 epidermal OS=Homo sapiens GN=KRT2 PE=1 SV=2	P35908	KRT2	65433.9	3	3	3	NLDLDSIIAEVK	R	A	0.995	41.9	33.9	15.6	41.9	0	1	0	0	2	1329.73	9138.75	15621800	342	353
Mudpit_Aged L3 4 Anterior NP IAF	Immunoglobulin delta heavy chain OS=Homo sapiens PE=1 SV=1	IGD_HUMAN		0	6	8	14	DAHLTWEVAGK	?	?	0.997	40.5	26.2	15.5	40.5	0	2	0	0	2	1226.62	5413.58	14169300	0	0
Mudpit_Aged L3 4 Anterior NP IAF	Immunoglobulin delta heavy chain OS=Homo sapiens PE=1 SV=1	IGD_HUMAN		0	6	8	14	DSYYMTSSQLSTPLQQWR	?	?	0.997	110	32.5	19.9	110	0	3	0	0	2	2191.01	8887.96	11921900	0	0
Mudpit_Aged L3 4 Anterior NP IAF	Immunoglobulin delta heavy chain OS=Homo sapiens PE=1 SV=1	IGD_HUMAN		0	6	8	14	NQFSLNLR	?	?	0.99	34.1	25.7	19.8	29.4	0	1	0	0	2	991.532	6640.96	4639110	0	0
Mudpit_Aged L3 4 Anterior NP IAF	Immunoglobulin delta heavy chain OS=Homo sapiens PE=1 SV=1	IGD_HUMAN		0	6	8	14	SLEVSYVTDHGPM	?	?	0.997	60.3	25	16.8	60.3	0	3	0	0	2	1434.66	6339.42	17866100	0	0
Mudpit_Aged L3 4 Anterior NP IAF	Immunoglobulin delta heavy chain OS=Homo sapiens PE=1 SV=1	IGD_HUMAN		0	6	8	14	VPTGGVEEGLLER	?	?	0.997	72.7	25.9	17.5	72.7	0	3	0	0	2	1355.72	5713.54	23832000	0	0
Mudpit_Aged L3 4 Anterior NP IAF	Immunoglobulin delta heavy chain OS=Homo sapiens PE=1 SV=1	IGD_HUMAN		0	6	8	14	VTISVDTSR	?	?	0.997	54.4	29.2	28.2	42.6	0	2	0	0	2	977.526	3256.79	12405700	0	0
Mudpit_Aged L3 4 Anterior NP IAF	IGK@ protein OS=Homo sapiens GN=IGK@ PE=1 SV=1	Q6P5S8	IGK	25773.1	10	14	190	DSTYSLSSTLTLSK	K	A	0.997	98.8	26.1	19.2	98.8	0	80	4	0	2	1502.76	7284.91	2580790000	192	205
Mudpit_Aged L3 4 Anterior NP IAF	IGK@ protein OS=Homo sapiens GN=IGK@ PE=1 SV=1	Q6P5S8	IGK	25773.1	10	14	190	FSGSGSGTDFTLTITR	R	L	0.997	130	33.8	21.1	130	0	2	0	0	2	1646.8	7404.8	12031600	83	98
Mudpit_Aged L3 4 Anterior NP IAF	IGK@ protein OS=Homo sapiens GN=IGK@ PE=1 SV=1	Q6P5S8	IGK	25773.1	10	14	190	LLIYGASSR	R	A	0.997	42.8	26.6	33.8	24.7	0	3	0	0	2	979.557	4622.16	52277400	67	75
Mudpit_Aged L3 4 Anterior NP IAF	IGK@ protein OS=Homo sapiens GN=IGK@ PE=1 SV=1	Q6P5S8	IGK	25773.1	10	14	190	RTVAAPSVFIFPPSDEQLK	K	S	0.997	36.1	26	15.3	36.1	0	1	0	0	2	2102.13	9402.68	6997060	130	148
Mudpit_Aged L3 4 Anterior NP IAF	IGK@ protein OS=Homo sapiens GN=IGK@ PE=1 SV=1	Q6P5S8	IGK	25773.1	10	14	190	SGTASVVCLLNNFYPR	K	E	0.997	120	26.9	20.5	120	0	15	0	0	2	1798.88	9159.74	328819000	149	164
Mudpit_Aged L3 4 Anterior NP IAF	IGK@ protein OS=Homo sapiens GN=IGK@ PE=1 SV=1	Q6P5S8	IGK	25773.1	10	14	190	TVAAPSVFIFPPSDEQLK	R	S	0.997	79.8	26.7	18	79.8	0	19	4	0	2	1946.03	9144.66	5806290000	131	148
Mudpit_Aged L3 4 Anterior NP IAF	IGK@ protein OS=Homo sapiens GN=IGK@ PE=1 SV=1	Q6P5S8	IGK	25773.1	10	14	190	VDNALQSGNSQESVTEQDSK	K	D	0.997	131	25	21.2	131	0	22	25	0	2	2135.97	2803.21	3208750000	172	191
Mudpit_Aged L3 4 Anterior NP IAF	IGK@ protein OS=Homo sapiens GN=IGK@ PE=1 SV=1	Q6P5S8	IGK	25773.1	10	14	190	VDNALQSGNSQESVTEQDSKDSTYSLSSTLTLSK	K	A	0.997	81.3	25	18.1	81.3	0	0	8	0	2	3619.71	7781.45	16313900	172	205
Mudpit_Aged L3 4 Anterior NP IAF	IGK@ protein OS=Homo sapiens GN=IGK@ PE=1 SV=1	Q6P5S8	IGK	25773.1	10	14	190	VQWKVDNALQSGNSQESVTEQDSK	K	D	0.997	93.8	25	18.9	93.8	0	0	2	0	2	2677.27	6166.92	12001300	168	191
Mudpit_Aged L3 4 Anterior NP IAF	IGK@ protein OS=Homo sapiens GN=IGK@ PE=1 SV=1	Q6P5S8	IGK	25773.1	10	14	190	VYACEVTHQGLSSPVTK	K	S	0.997	68	26.1	17.2	68	0	3	2	0	2	1876.91	5512.2	27944400	213	229
Mudpit_Aged L3 4 Anterior NP IAF	A0A1L7B5J3_HUMAN	A0A1L7B5J3_HUMAN		0	2	3	8	FLEAIPMSIPPEVK	?	?	0.997	40.3	25.9	15.5	40.3	0	7	0	0	2	1570.86	9048.16	93353100	0	0
Mudpit_Aged L3 4 Anterior NP IAF	A0A1L7B5J3_HUMAN	A0A1L7B5J3_HUMAN		0	2	3	8	FNKPFVFLMIEQNTK	K	S	0.966	35.2	25.5	15.2	35.2	0	0	1	0	2	1855.98	9477.02	4559560	0	0
Mudpit_Aged L3 4 Anterior NP IAF	A0A1L7B5J3_HUMAN	A0A1L7B5J3_HUMAN		0	2	3	8	MFLEAIPMSIPPEVK	?	?	0.997	55.4	27.6	16.5	55.4	0	1	0	0	2	1701.9	9224.72	11064600	0	0
Mudpit_Aged L3 4 Anterior NP IAF	Carboxypeptidase N subunit 2 OS=Homo sapiens GN=CPN2 PE=1 SV=3	P22792	CPN2	60558.7	3	3	3	AGGSWDLAVQER	K	A	0.997	50.8	25	16.2	50.8	0	1	0	0	2	1288.63	5512.28	4077900	464	475
Mudpit_Aged L3 4 Anterior NP IAF	Carboxypeptidase N subunit 2 OS=Homo sapiens GN=CPN2 PE=1 SV=3	P22792	CPN2	60558.7	3	3	3	GQVVPALNEK	K	Q	0.997	38.3	25	15.4	38.3	0	1	0	0	2	1054.59	3614.38	4892010	432	441
Mudpit_Aged L3 4 Anterior NP IAF	Carboxypeptidase N subunit 2 OS=Homo sapiens GN=CPN2 PE=1 SV=3	P22792	CPN2	60558.7	3	3	3	LELLSLSK	K	N	0.99	31.1	25	23.7	22.4	0	1	0	0	2	902.556	7402.95	8802410	363	370
Mudpit_Aged L3 4 Anterior NP IAF	EGF-containing fibulin-like extracellular matrix protein 2, isoform CRA_a OS=Homo sapiens GN=EFEMP2 PE=4 SV=1	A0A024R5G1,B2RCM5,E9PRU1,H0YET5,H0YEU0,O95967,Q59GI8,Q96TF5,Q9H3D5	EFEMP2,MBP1	49404.1	2	3	3	AGNSQGDFYIR	R	Q	0.997	40.6	25	15.5	40.6	0	1	0	0	2	1227.58	4276.17	29021500	380	390
Mudpit_Aged L3 4 Anterior NP IAF	EGF-containing fibulin-like extracellular matrix protein 2, isoform CRA_a OS=Homo sapiens GN=EFEMP2 PE=4 SV=1	A0A024R5G1,B2RCM5,E9PRU1,H0YET5,H0YEU0,O95967,Q59GI8,Q96TF5,Q9H3D5	EFEMP2,MBP1	49404.1	2	3	3	YMTITSER	R	S	0.99	36.8	25	15.3	36.8	0	2	0	0	2	1016.47	2774.92	15715600	347	354
Mudpit_Aged L3 4 Anterior NP IAF	Myosin-reactive immunoglobulin heavy chain variable region (Fragment) OS=Homo sapiens PE=2 SV=1	Q9UL89		12605.3	2	3	6	QAPGQGLEWMGR	R	I	0.997	44.3	25	57	3.11	0	5	0	0	2	1329.64	5391.64	46711500	35	46
Mudpit_Aged L3 4 Anterior NP IAF	Myosin-reactive immunoglobulin heavy chain variable region (Fragment) OS=Homo sapiens PE=2 SV=1	Q9UL89		12605.3	2	3	6	STSTAYMELSSLR	K	S	0.997	62.4	25.2	16.9	62.4	0	1	0	0	2	1445.69	6531.31	35791400	71	83
Mudpit_Aged L3 4 Anterior NP IAF	Adipocyte enhancer-binding protein 1 OS=Homo sapiens GN=AEBP1 PE=1 SV=1	Q8IUX7	AEBP1	130931	16	26	63	AIIAWMEK	R	N	0.99	36.7	27.6	15.3	36.7	0	2	0	0	2	961.518	6851.31	13048500	746	753
Mudpit_Aged L3 4 Anterior NP IAF	Adipocyte enhancer-binding protein 1 OS=Homo sapiens GN=AEBP1 PE=1 SV=1	Q8IUX7	AEBP1	130931	16	26	63	DTPVLSELPEPVVAR	K	F	0.997	55.9	25.8	16.5	55.9	0	2	1	0	2	1621.88	8228.94	91980700	504	518
Mudpit_Aged L3 4 Anterior NP IAF	Adipocyte enhancer-binding protein 1 OS=Homo sapiens GN=AEBP1 PE=1 SV=1	Q8IUX7	AEBP1	130931	16	26	63	EALLTFMEQVHR	K	G	0.995	57.9	27	16.6	57.9	0	0	2	0	2	1473.75	9346.43	28786500	895	906
Mudpit_Aged L3 4 Anterior NP IAF	Adipocyte enhancer-binding protein 1 OS=Homo sapiens GN=AEBP1 PE=1 SV=1	Q8IUX7	AEBP1	130931	16	26	63	FPHESELPR	K	E	0.983	45.4	27.4	15.8	45.4	0	0	2	0	2	1111.55	5479.29	23271900	880	888
Mudpit_Aged L3 4 Anterior NP IAF	Adipocyte enhancer-binding protein 1 OS=Homo sapiens GN=AEBP1 PE=1 SV=1	Q8IUX7	AEBP1	130931	16	26	63	FTGVITQGR	R	D	0.996	39.3	26.7	15.5	39.3	0	3	0	0	2	978.537	3528.4	27035300	454	462
Mudpit_Aged L3 4 Anterior NP IAF	Adipocyte enhancer-binding protein 1 OS=Homo sapiens GN=AEBP1 PE=1 SV=1	Q8IUX7	AEBP1	130931	16	26	63	GEDEDEVSEAQETPDHAIFR	R	W	0.997	129	25	21	129	0	2	14	0	2	2273.98	6060.53	75053400	794	813
Mudpit_Aged L3 4 Anterior NP IAF	Adipocyte enhancer-binding protein 1 OS=Homo sapiens GN=AEBP1 PE=1 SV=1	Q8IUX7	AEBP1	130931	16	26	63	GEELEEEWTPTEK	K	V	0.997	58.9	25	16.7	58.9	0	1	0	0	2	1576.7	6027.74	3374080	370	382
Mudpit_Aged L3 4 Anterior NP IAF	Adipocyte enhancer-binding protein 1 OS=Homo sapiens GN=AEBP1 PE=1 SV=1	Q8IUX7	AEBP1	130931	16	26	63	IYAMEISDNPGEHELGEPEFR	K	Y	0.997	98.2	25	19.1	98.2	0	1	4	0	2	2449.1	7730.41	45785300	599	619
Mudpit_Aged L3 4 Anterior NP IAF	Adipocyte enhancer-binding protein 1 OS=Homo sapiens GN=AEBP1 PE=1 SV=1	Q8IUX7	AEBP1	130931	16	26	63	KGEELEEEWTPTEK	R	V	0.992	49.5	26.2	16.1	49.5	0	0	2	0	2	1704.8	7304.01	20783700	369	382
Mudpit_Aged L3 4 Anterior NP IAF	Adipocyte enhancer-binding protein 1 OS=Homo sapiens GN=AEBP1 PE=1 SV=1	Q8IUX7	AEBP1	130931	16	26	63	LNMQTGATEDDYYDGAWCAEDDAR	R	T	0.968	53.9	25	16.4	53.9	0	0	1	0	2	2768.07	7336.9	2412970	417	440
Mudpit_Aged L3 4 Anterior NP IAF	Adipocyte enhancer-binding protein 1 OS=Homo sapiens GN=AEBP1 PE=1 SV=1	Q8IUX7	AEBP1	130931	16	26	63	LVSYPYDMAR	R	T	0.997	44.5	25	15.8	44.5	0	7	0	0	2	1214.59	4273.8	61018300	768	777
Mudpit_Aged L3 4 Anterior NP IAF	Adipocyte enhancer-binding protein 1 OS=Homo sapiens GN=AEBP1 PE=1 SV=1	Q8IUX7	AEBP1	130931	16	26	63	NPFVLGANLNGGER	K	L	0.997	72.6	26.8	17.5	72.6	0	1	0	0	2	1457.75	7124.97	4939240	754	767
Mudpit_Aged L3 4 Anterior NP IAF	Adipocyte enhancer-binding protein 1 OS=Homo sapiens GN=AEBP1 PE=1 SV=1	Q8IUX7	AEBP1	130931	16	26	63	TPTQEQLLAAAMAAAR	R	G	0.997	100	27.4	19.8	99.9	0	4	4	0	2	1642.86	8618.89	146700000	778	793
Mudpit_Aged L3 4 Anterior NP IAF	Adipocyte enhancer-binding protein 1 OS=Homo sapiens GN=AEBP1 PE=1 SV=1	Q8IUX7	AEBP1	130931	16	26	63	VPNNNLPIPER	R	Y	0.997	75.4	25.2	17.7	75.4	0	2	0	0	2	1262.69	4608.16	16478100	722	732
Mudpit_Aged L3 4 Anterior NP IAF	Adipocyte enhancer-binding protein 1 OS=Homo sapiens GN=AEBP1 PE=1 SV=1	Q8IUX7	AEBP1	130931	16	26	63	YLSPDATVSTEVR	R	A	0.997	82.4	29.9	18.1	82.4	0	5	0	0	2	1437.72	4829.98	37538100	733	745
Mudpit_Aged L3 4 Anterior NP IAF	Adipocyte enhancer-binding protein 1 OS=Homo sapiens GN=AEBP1 PE=1 SV=1	Q8IUX7	AEBP1	130931	16	26	63	YTAGIHGNEVLGR	R	E	0.997	48.4	26.6	16	48.4	0	1	2	0	2	1386.71	4644.88	31722700	620	632
Mudpit_Aged L3 4 Anterior NP IAF	Prolargin OS=Homo sapiens GN=PRELP PE=1 SV=1	P51888	PRELP	43812.4	14	24	163	IETIPNGYFK	K	S	0.988	34	26.5	15.1	34	0	1	0	0	2	1181.62	6033.43	8192390	254	263
Mudpit_Aged L3 4 Anterior NP IAF	Prolargin OS=Homo sapiens GN=PRELP PE=1 SV=1	P51888	PRELP	43812.4	14	24	163	IHYLYLQNNFITELPVESFQNATGLR	R	W	0.984	40.5	25.4	15.5	40.5	0	0	2	0	2	3080.58	10087.7	1083340	104	129
Mudpit_Aged L3 4 Anterior NP IAF	Prolargin OS=Homo sapiens GN=PRELP PE=1 SV=1	P51888	PRELP	43812.4	14	24	163	IPPGVFSK	R	L	0.99	48.2	28.9	26.2	38	0	11	0	0	2	844.493	4475.98	674603000	186	193
Mudpit_Aged L3 4 Anterior NP IAF	Prolargin OS=Homo sapiens GN=PRELP PE=1 SV=1	P51888	PRELP	43812.4	14	24	163	ISSVPAINNR	R	L	0.997	46.1	25	15.9	46.1	0	8	0	0	2	1070.6	3383.45	91531300	303	312
Mudpit_Aged L3 4 Anterior NP IAF	Prolargin OS=Homo sapiens GN=PRELP PE=1 SV=1	P51888	PRELP	43812.4	14	24	163	KVPVIPPR	R	I	0.99	39	25	15.4	39	0	8	0	0	2	905.593	4702.6	66258800	96	103
Mudpit_Aged L3 4 Anterior NP IAF	Prolargin OS=Homo sapiens GN=PRELP PE=1 SV=1	P51888	PRELP	43812.4	14	24	163	LEHLYLNNNSIEK	R	I	0.997	69.1	26.7	17.8	68.6	0	7	10	0	2	1586.82	5712.97	440671000	313	325
Mudpit_Aged L3 4 Anterior NP IAF	Prolargin OS=Homo sapiens GN=PRELP PE=1 SV=1	P51888	PRELP	43812.4	14	24	163	LENLLLLDLQHNR	K	L	0.997	72.6	25	17.5	72.6	0	6	13	0	2	1590.9	9391.07	374714000	194	206
Mudpit_Aged L3 4 Anterior NP IAF	Prolargin OS=Homo sapiens GN=PRELP PE=1 SV=1	P51888	PRELP	43812.4	14	24	163	LPGLVFLYMEK	K	N	0.997	67	25.9	17.2	67	0	6	0	0	2	1309.72	9090.43	202291000	149	159
Mudpit_Aged L3 4 Anterior NP IAF	Prolargin OS=Homo sapiens GN=PRELP PE=1 SV=1	P51888	PRELP	43812.4	14	24	163	LSDGVFKPDTFHGLK	R	N	0.997	95	27.1	18.9	95	0	6	6	6	2	1660.87	9734.21	118826000	207	221
Mudpit_Aged L3 4 Anterior NP IAF	Prolargin OS=Homo sapiens GN=PRELP PE=1 SV=1	P51888	PRELP	43812.4	14	24	163	NLMQLNLAHNILR	K	K	0.997	81.6	25	18.1	81.6	0	6	6	0	2	1565.86	9133.28	291362000	222	234
Mudpit_Aged L3 4 Anterior NP IAF	Prolargin OS=Homo sapiens GN=PRELP PE=1 SV=1	P51888	PRELP	43812.4	14	24	163	NQLEEVPSALPR	K	N	0.997	64.1	28.3	19.6	61.5	0	8	5	0	2	1352.72	5781.46	1661880000	160	171
Mudpit_Aged L3 4 Anterior NP IAF	Prolargin OS=Homo sapiens GN=PRELP PE=1 SV=1	P51888	PRELP	43812.4	14	24	163	SFPNLAFIR	K	L	0.997	47.2	26.2	16	47.2	0	5	0	0	2	1064.59	8570.56	407872000	264	272
Mudpit_Aged L3 4 Anterior NP IAF	Prolargin OS=Homo sapiens GN=PRELP PE=1 SV=1	P51888	PRELP	43812.4	14	24	163	VPTAIHQLYLDSNK	R	I	0.997	95.9	26.5	19	95.9	0	17	19	0	2	1598.85	7700.76	1450800000	240	253
Mudpit_Aged L3 4 Anterior NP IAF	Prolargin OS=Homo sapiens GN=PRELP PE=1 SV=1	P51888	PRELP	43812.4	14	24	163	WINLDNNR	R	I	0.99	36.9	25	15.3	36.9	0	7	0	0	2	1044.52	5474.33	565977000	130	137
Mudpit_Aged L3 4 Anterior NP IAF	Lumican OS=Homo sapiens GN=LUM PE=1 SV=2	P51884	LUM	38431.5	10	16	118	EDAVSAAFK	K	G	0.997	80.1	26	18	80.1	0	11	0	0	2	937.462	3878.05	1272520000	173	181
Mudpit_Aged L3 4 Anterior NP IAF	Lumican OS=Homo sapiens GN=LUM PE=1 SV=2	P51884	LUM	38431.5	10	16	118	FNALQYLR	R	L	0.99	41.5	25	20.7	36.3	0	9	0	0	2	1024.56	8260.19	308594000	228	235
Mudpit_Aged L3 4 Anterior NP IAF	Lumican OS=Homo sapiens GN=LUM PE=1 SV=2	P51884	LUM	38431.5	10	16	118	ILGPLSYSK	K	I	0.997	55.1	25	33.9	37.6	0	7	0	0	2	977.567	5686.22	167864000	297	305
Mudpit_Aged L3 4 Anterior NP IAF	Lumican OS=Homo sapiens GN=LUM PE=1 SV=2	P51884	LUM	38431.5	10	16	118	ISNIPDEYFK	K	R	0.997	68.2	25	19.7	65.8	0	19	0	0	2	1225.61	6233.81	1453050000	217	226
Mudpit_Aged L3 4 Anterior NP IAF	Lumican OS=Homo sapiens GN=LUM PE=1 SV=2	P51884	LUM	38431.5	10	16	118	LKEDAVSAAFK	R	G	0.997	83.2	26.3	25.2	76.2	0	8	9	0	2	1178.64	4780.2	148585000	171	181
Mudpit_Aged L3 4 Anterior NP IAF	Lumican OS=Homo sapiens GN=LUM PE=1 SV=2	P51884	LUM	38431.5	10	16	118	LPSGLPVSLLTLYLDNNK	R	I	0.997	77.1	25	17.8	77.1	0	1	1	0	2	1957.1	9453.28	582439000	199	216
Mudpit_Aged L3 4 Anterior NP IAF	Lumican OS=Homo sapiens GN=LUM PE=1 SV=2	P51884	LUM	38431.5	10	16	118	NIPTVNENLENYYLEVNQLEK	K	F	0.997	99.3	26.2	19.2	99.3	0	5	3	0	2	2536.26	9122.95	166371000	268	288
Mudpit_Aged L3 4 Anterior NP IAF	Lumican OS=Homo sapiens GN=LUM PE=1 SV=2	P51884	LUM	38431.5	10	16	118	SLEDLQLTHNK	K	I	0.997	79.8	25.5	18	79.8	0	10	12	0	2	1297.67	4905.92	869461000	138	148
Mudpit_Aged L3 4 Anterior NP IAF	Lumican OS=Homo sapiens GN=LUM PE=1 SV=2	P51884	LUM	38431.5	10	16	118	SLEYLDLSFNQIAR	K	L	0.997	74.9	26.3	17.7	74.9	0	6	2	0	2	1668.86	9227.19	815479000	185	198
Mudpit_Aged L3 4 Anterior NP IAF	Lumican OS=Homo sapiens GN=LUM PE=1 SV=2	P51884	LUM	38431.5	10	16	118	SVPMVPPGIK	K	Y	0.997	37	25	15.3	37	0	15	0	0	2	1024.59	5291.42	498246000	60	69
Mudpit_Aged L3 4 Anterior NP IAF	Angiopoietin-like 2, isoform CRA_a OS=Homo sapiens GN=ANGPTL2 PE=4 SV=1	A0A024R868,Q9UKU9	ANGPTL2	57104.9	13	14	30	DNALELSQLENR	R	I	0.997	87.5	34.9	23	83	0	1	0	0	2	1401.7	6291.33	8618450	150	161
Mudpit_Aged L3 4 Anterior NP IAF	Angiopoietin-like 2, isoform CRA_a OS=Homo sapiens GN=ANGPTL2 PE=4 SV=1	A0A024R868,Q9UKU9	ANGPTL2	57104.9	13	14	30	EPEVLLENR	K	V	0.997	49.3	26.2	16.1	49.3	0	1	0	0	2	1098.58	4984.56	7486880	75	83
Mudpit_Aged L3 4 Anterior NP IAF	Angiopoietin-like 2, isoform CRA_a OS=Homo sapiens GN=ANGPTL2 PE=4 SV=1	A0A024R868,Q9UKU9	ANGPTL2	57104.9	13	14	30	HDPGGWTVIQR	R	R	0.997	47.7	26.5	18.6	45	0	2	0	0	2	1265.64	6481.68	24572800	311	321
Mudpit_Aged L3 4 Anterior NP IAF	Angiopoietin-like 2, isoform CRA_a OS=Homo sapiens GN=ANGPTL2 PE=4 SV=1	A0A024R868,Q9UKU9	ANGPTL2	57104.9	13	14	30	IINQISTNEIQSDQNLK	R	V	0.997	61.8	26.2	16.9	61.8	0	1	0	0	2	1958.02	5305.94	6567090	233	249
Mudpit_Aged L3 4 Anterior NP IAF	Angiopoietin-like 2, isoform CRA_a OS=Homo sapiens GN=ANGPTL2 PE=4 SV=1	A0A024R868,Q9UKU9	ANGPTL2	57104.9	13	14	30	LDGSVNFFR	R	N	0.997	71.8	25.6	17.5	71.8	0	4	0	0	2	1054.53	7118.77	32876700	323	331
Mudpit_Aged L3 4 Anterior NP IAF	Angiopoietin-like 2, isoform CRA_a OS=Homo sapiens GN=ANGPTL2 PE=4 SV=1	A0A024R868,Q9UKU9	ANGPTL2	57104.9	13	14	30	LEPESEYYK	R	L	0.997	41.1	25	15.6	41.1	0	2	0	0	2	1157.54	3705.04	31077300	386	394
Mudpit_Aged L3 4 Anterior NP IAF	Angiopoietin-like 2, isoform CRA_a OS=Homo sapiens GN=ANGPTL2 PE=4 SV=1	A0A024R868,Q9UKU9	ANGPTL2	57104.9	13	14	30	LLVTMEDWSGR	K	K	0.997	64.6	27.2	17	64.6	0	8	0	0	2	1306.65	7024.16	80018800	365	375
Mudpit_Aged L3 4 Anterior NP IAF	Angiopoietin-like 2, isoform CRA_a OS=Homo sapiens GN=ANGPTL2 PE=4 SV=1	A0A024R868,Q9UKU9	ANGPTL2	57104.9	13	14	30	QELELLNNELLK	K	Q	0.997	58.9	25	24.5	51.1	0	1	0	0	2	1455.81	8797.06	15778400	87	98
Mudpit_Aged L3 4 Anterior NP IAF	Angiopoietin-like 2, isoform CRA_a OS=Homo sapiens GN=ANGPTL2 PE=4 SV=1	A0A024R868,Q9UKU9	ANGPTL2	57104.9	13	14	30	QIETLQQLVEVDGGIVSEVK	R	L	0.997	95	25.5	18.9	95	0	2	0	0	2	2184.18	9127.45	16422600	102	121
Mudpit_Aged L3 4 Anterior NP IAF	Angiopoietin-like 2, isoform CRA_a OS=Homo sapiens GN=ANGPTL2 PE=4 SV=1	A0A024R868,Q9UKU9	ANGPTL2	57104.9	13	14	30	RDNALELSQLENR	K	I	0.985	43.9	27.4	15.7	43.9	0	0	2	0	2	1557.8	7527.73	15746700	149	161
Mudpit_Aged L3 4 Anterior NP IAF	Angiopoietin-like 2, isoform CRA_a OS=Homo sapiens GN=ANGPTL2 PE=4 SV=1	A0A024R868,Q9UKU9	ANGPTL2	57104.9	13	14	30	VFAEYASFR	K	L	0.997	44.5	25.6	15.8	44.5	0	2	0	0	2	1089.54	6479.15	12335400	377	385
Mudpit_Aged L3 4 Anterior NP IAF	Angiopoietin-like 2, isoform CRA_a OS=Homo sapiens GN=ANGPTL2 PE=4 SV=1	A0A024R868,Q9UKU9	ANGPTL2	57104.9	13	14	30	VYQPPTYNR	R	I	0.96	25.4	25.7	14.6	25.4	0	1	0	0	2	1137.57	3124.1	1007020	224	232
Mudpit_Aged L3 4 Anterior NP IAF	Angiopoietin-like 2, isoform CRA_a OS=Homo sapiens GN=ANGPTL2 PE=4 SV=1	A0A024R868,Q9UKU9	ANGPTL2	57104.9	13	14	30	YQDGVYWAEFR	R	G	0.997	70	28.4	17.4	70	0	3	0	0	2	1433.65	8468.02	58939100	462	472
Mudpit_Aged L3 4 Anterior NP IAF	cDNA FLJ75416, highly similar to Homo sapiens complement factor H (CFH), mRNA OS=Homo sapiens PE=2 SV=1	A8K5T0,P08603	CFH	139096	16	27	78	AQTTVTCMENGWSPTPR	K	C	0.997	71.6	25	17.5	71.6	0	12	3	0	2	1936.85	5536.35	107301000	425	441
Mudpit_Aged L3 4 Anterior NP IAF	cDNA FLJ75416, highly similar to Homo sapiens complement factor H (CFH), mRNA OS=Homo sapiens PE=2 SV=1	A8K5T0,P08603	CFH	139096	16	27	78	AVYTCNEGYQLLGEINYR	K	E	0.997	94.8	25	18.9	94.8	0	1	1	0	2	2164	8498.07	20689300	110	127
Mudpit_Aged L3 4 Anterior NP IAF	cDNA FLJ75416, highly similar to Homo sapiens complement factor H (CFH), mRNA OS=Homo sapiens PE=2 SV=1	A8K5T0,P08603	CFH	139096	16	27	78	CNMGYEYSER	K	G	0.973	26.4	25	14.7	26.4	0	1	0	0	2	1309.48	3413.13	5506650	237	246
Mudpit_Aged L3 4 Anterior NP IAF	cDNA FLJ75416, highly similar to Homo sapiens complement factor H (CFH), mRNA OS=Homo sapiens PE=2 SV=1	A8K5T0,P08603	CFH	139096	16	27	78	EGWIHTVCINGR	K	W	0.997	52.2	25.7	16.3	52.2	0	2	0	0	2	1442.68	7619.6	42879400	785	796
Mudpit_Aged L3 4 Anterior NP IAF	cDNA FLJ75416, highly similar to Homo sapiens complement factor H (CFH), mRNA OS=Homo sapiens PE=2 SV=1	A8K5T0,P08603	CFH	139096	16	27	78	EIMENYNIALR	R	W	0.997	65.8	27.4	18.4	64.4	0	6	0	0	2	1365.68	6552.58	131230000	1172	1182
Mudpit_Aged L3 4 Anterior NP IAF	cDNA FLJ75416, highly similar to Homo sapiens complement factor H (CFH), mRNA OS=Homo sapiens PE=2 SV=1	A8K5T0,P08603	CFH	139096	16	27	78	EQVQSCGPPPELLNGNVK	K	E	0.997	65.7	26.1	17.1	65.7	0	4	0	0	2	1966.95	5513.46	42007800	625	642
Mudpit_Aged L3 4 Anterior NP IAF	cDNA FLJ75416, highly similar to Homo sapiens complement factor H (CFH), mRNA OS=Homo sapiens PE=2 SV=1	A8K5T0,P08603	CFH	139096	16	27	78	EYHFGQAVR	R	F	0.997	46.7	26.4	15.9	46.7	0	1	0	0	2	1106.54	4585.64	26638300	167	175
Mudpit_Aged L3 4 Anterior NP IAF	cDNA FLJ75416, highly similar to Homo sapiens complement factor H (CFH), mRNA OS=Homo sapiens PE=2 SV=1	A8K5T0,P08603	CFH	139096	16	27	78	GEWVALNPLR	K	K	0.996	34.1	25	15.1	34.1	0	3	0	0	2	1154.63	8243.47	308136000	69	78
Mudpit_Aged L3 4 Anterior NP IAF	cDNA FLJ75416, highly similar to Homo sapiens complement factor H (CFH), mRNA OS=Homo sapiens PE=2 SV=1	A8K5T0,P08603	CFH	139096	16	27	78	IDVHLVPDR	K	K	0.997	57	25.4	16.6	57	0	2	3	0	2	1063.59	5720.06	55739600	574	582
Mudpit_Aged L3 4 Anterior NP IAF	cDNA FLJ75416, highly similar to Homo sapiens complement factor H (CFH), mRNA OS=Homo sapiens PE=2 SV=1	A8K5T0,P08603	CFH	139096	16	27	78	IDVHLVPDRK	K	K	0.988	29.3	25	14.8	29.3	0	1	0	0	2	1191.68	5840.29	6252560	574	583
Mudpit_Aged L3 4 Anterior NP IAF	cDNA FLJ75416, highly similar to Homo sapiens complement factor H (CFH), mRNA OS=Homo sapiens PE=2 SV=1	A8K5T0,P08603	CFH	139096	16	27	78	IVSSAMEPDR	K	E	0.997	66.4	25.4	17.2	66.4	0	8	0	0	2	1104.54	1851.03	72362800	157	166
Mudpit_Aged L3 4 Anterior NP IAF	cDNA FLJ75416, highly similar to Homo sapiens complement factor H (CFH), mRNA OS=Homo sapiens PE=2 SV=1	A8K5T0,P08603	CFH	139096	16	27	78	IVSSAMEPDREYHFGQAVR	K	F	0.98	27.9	25.5	16.2	26.4	0	1	0	0	2	2208.05	5993.87	4203010	157	175
Mudpit_Aged L3 4 Anterior NP IAF	cDNA FLJ75416, highly similar to Homo sapiens complement factor H (CFH), mRNA OS=Homo sapiens PE=2 SV=1	A8K5T0,P08603	CFH	139096	16	27	78	NTEILTGSWSDQTYPEGTQAIYK	R	C	0.997	114	25	20.1	114	0	10	5	0	2	2602.23	8303.58	133845000	29	51
Mudpit_Aged L3 4 Anterior NP IAF	cDNA FLJ75416, highly similar to Homo sapiens complement factor H (CFH), mRNA OS=Homo sapiens PE=2 SV=1	A8K5T0,P08603	CFH	139096	16	27	78	RNTEILTGSWSDQTYPEGTQAIYK	R	C	0.981	39.8	25.7	15.5	39.8	0	0	1	0	2	2758.33	8260.3	5732720	28	51
Mudpit_Aged L3 4 Anterior NP IAF	cDNA FLJ75416, highly similar to Homo sapiens complement factor H (CFH), mRNA OS=Homo sapiens PE=2 SV=1	A8K5T0,P08603	CFH	139096	16	27	78	SPPEISHGVVAHMSDSYQYGEEVTYK	K	C	0.996	65	25	17.1	65	0	0	5	1	2	2926.32	7317.17	63837800	933	958
Mudpit_Aged L3 4 Anterior NP IAF	cDNA FLJ75416, highly similar to Homo sapiens complement factor H (CFH), mRNA OS=Homo sapiens PE=2 SV=1	A8K5T0,P08603	CFH	139096	16	27	78	SSNLIILEEHLK	K	N	0.997	53.2	25	16.3	53.2	0	4	3	0	2	1395.78	8365.83	302835000	755	766
Mudpit_Aged L3 4 Anterior NP IAF	Fin bud initiation factor homolog OS=Homo sapiens GN=FIBIN PE=1 SV=1	Q8TAL6	FIBIN	24274	3	3	3	EEFTVLGR	R	Q	0.99	45.5	27.4	23	38.3	0	1	0	0	2	950.494	5648.47	6498540	82	89
Mudpit_Aged L3 4 Anterior NP IAF	Fin bud initiation factor homolog OS=Homo sapiens GN=FIBIN PE=1 SV=1	Q8TAL6	FIBIN	24274	3	3	3	ETLDISVGLR	K	D	0.982	33.8	30.3	15.1	33.8	0	1	0	0	2	1102.61	6727.07	6385830	175	184
Mudpit_Aged L3 4 Anterior NP IAF	Fin bud initiation factor homolog OS=Homo sapiens GN=FIBIN PE=1 SV=1	Q8TAL6	FIBIN	24274	3	3	3	SISYDLDGEESYGK	K	Y	0.994	32.5	25	15	32.5	0	1	0	0	2	1562.69	5506.85	2664260	104	117
Mudpit_Aged L3 4 Anterior NP IAF	Insulin-like growth factor binding protein 5, isoform CRA_a OS=Homo sapiens GN=IGFBP5 PE=4 SV=1	A0A024R433,P24593	IGFBP5	30570	2	3	3	HMEASLQELK	R	A	0.997	45.9	25	15.9	45.9	0	2	0	0	2	1185.59	5590.19	12335800	195	204
Mudpit_Aged L3 4 Anterior NP IAF	Insulin-like growth factor binding protein 5, isoform CRA_a OS=Homo sapiens GN=IGFBP5 PE=4 SV=1	A0A024R433,P24593	IGFBP5	30570	2	3	3	IISAPEMR	R	Q	0.97	29.5	26.9	21	23.3	0	1	0	0	2	932.487	2527.82	315695	177	184
Mudpit_Aged L3 4 Anterior NP IAF	Protein SAA2-SAA4 OS=Homo sapiens GN=SAA2-SAA4 PE=4 SV=1	A0A096LPE2	SAA2-SAA4	23354.3	4	6	18	AYWDIMISNHQNSNR	R	Y	0.997	81.9	25	18.1	81.9	0	5	0	0	2	1864.84	8391.35	24922400	116	130
Mudpit_Aged L3 4 Anterior NP IAF	Protein SAA2-SAA4 OS=Homo sapiens GN=SAA2-SAA4 PE=4 SV=1	A0A096LPE2	SAA2-SAA4	23354.3	4	6	18	EALQGVGDMGR	K	A	0.997	63.9	25	17	63.9	0	11	0	0	2	1148.54	3758.44	79363600	105	115
Mudpit_Aged L3 4 Anterior NP IAF	Protein SAA2-SAA4 OS=Homo sapiens GN=SAA2-SAA4 PE=4 SV=1	A0A096LPE2	SAA2-SAA4	23354.3	4	6	18	GPGGVWAAK	R	L	0.997	41.1	25	18.4	38.2	0	1	0	0	2	842.452	3711.65	8933700	144	152
Mudpit_Aged L3 4 Anterior NP IAF	Protein SAA2-SAA4 OS=Homo sapiens GN=SAA2-SAA4 PE=4 SV=1	A0A096LPE2	SAA2-SAA4	23354.3	4	6	18	SFFSFLGEAFDGAR	R	D	0.997	68.3	25.9	17.3	68.3	0	1	0	0	2	1550.73	9464.52	6519630	20	33
Mudpit_Aged L3 4 Anterior NP IAF	Collagen, type V, alpha 1, isoform CRA_a OS=Homo sapiens GN=COL5A1 PE=4 SV=1	A0A024R8E5,B2ZZ86,P20908	COL5A1	183563	2	2	3	FLGSNDEEMSYDNNPYIR	R	A	0.997	80.2	25	18	80.2	0	2	0	0	2	2179.92	6502.51	10895800	1766	1783
Mudpit_Aged L3 4 Anterior NP IAF	Collagen, type V, alpha 1, isoform CRA_a OS=Homo sapiens GN=COL5A1 PE=4 SV=1	A0A024R8E5,B2ZZ86,P20908	COL5A1	183563	2	2	3	TVLEIDTPK	K	V	0.997	51.6	27	23.8	44	0	1	0	0	2	1015.57	5024.99	6968150	1798	1806
Mudpit_Aged L3 4 Anterior NP IAF	Liver histone H1e OS=Homo sapiens PE=2 SV=1	A3R0T7,A3R0T8,P10412,Q4VB24	HIST1H1E	21866.9	3	3	4	ALAAAGYDVEK	K	N	0.997	57.1	27.8	16.6	57.1	0	2	0	0	2	1107.57	3781.82	27845700	65	75
Mudpit_Aged L3 4 Anterior NP IAF	Liver histone H1e OS=Homo sapiens PE=2 SV=1	A3R0T7,A3R0T8,P10412,Q4VB24	HIST1H1E	21866.9	3	3	4	ASGPPVSELITK	K	A	0.997	57.5	26	16.6	57.5	0	1	0	0	2	1198.67	5313.33	9776630	35	46
Mudpit_Aged L3 4 Anterior NP IAF	Liver histone H1e OS=Homo sapiens PE=2 SV=1	A3R0T7,A3R0T8,P10412,Q4VB24	HIST1H1E	21866.9	3	3	4	SGVSLAALK	R	K	0.997	54.7	28	31.8	39.2	0	1	0	0	2	845.509	4735.28	5864370	55	63
Mudpit_Aged L3 4 Anterior NP IAF	14-3-3 protein gamma OS=Homo sapiens GN=YWHAG PE=1 SV=2	P61981	YWHAG	28303.1	2	2	2	DSTLIMQLLR	K	D	0.997	44.7	26.2	17.4	43.1	0	1	0	0	2	1189.66	9258	15137500	218	227
Mudpit_Aged L3 4 Anterior NP IAF	14-3-3 protein gamma OS=Homo sapiens GN=YWHAG PE=1 SV=2	P61981	YWHAG	28303.1	2	2	2	NLLSVAYK	R	N	0.99	34.6	25.4	31	18.8	0	1	0	0	2	907.525	6159.72	9087410	43	50
Mudpit_Aged L3 4 Anterior NP IAF	14-3-3 protein gamma OS=Homo sapiens GN=YWHAG PE=1 SV=2	P61981	YWHAG	28303.1	2	2	2	NVTELNEPLSNEER	K	N	0.997	80.4	25	23.9	74.5	0	1	0	0	2	1643.79	5233.96	3696940	29	42
Mudpit_Aged L3 4 Anterior NP IAF	14-3-3 protein gamma OS=Homo sapiens GN=YWHAG PE=1 SV=2	P61981	YWHAG	28303.1	2	2	2	YLAEVATGEK	R	R	0.997	49.3	27.2	16.4	49	0	1	0	0	2	1080.56	3340.89	11178200	133	142
Mudpit_Aged L3 4 Anterior NP IAF	Decorin OS=Homo sapiens GN=DCN PE=1 SV=1	P07585,Q6FH10	DCN	39748.2	9	15	67	ASYSGVSLFSNPVQYWEIQPSTFR	K	C	0.997	114	31.3	20.1	114	0	4	1	0	2	2763.34	9341.55	48331400	322	345
Mudpit_Aged L3 4 Anterior NP IAF	Decorin OS=Homo sapiens GN=DCN PE=1 SV=1	P07585,Q6FH10	DCN	39748.2	9	15	67	DLPPDTTLLDLQNNK	K	I	0.997	84.1	26.5	19.5	82.9	0	11	8	0	2	1696.88	7737.6	1154760000	78	92
Mudpit_Aged L3 4 Anterior NP IAF	Decorin OS=Homo sapiens GN=DCN PE=1 SV=1	P07585,Q6FH10	DCN	39748.2	9	15	67	ITEIKDGDFK	K	N	0.997	62.2	35.4	16.9	62.2	0	8	6	0	2	1165.61	4247.17	174897000	93	102
Mudpit_Aged L3 4 Anterior NP IAF	Decorin OS=Homo sapiens GN=DCN PE=1 SV=1	P07585,Q6FH10	DCN	39748.2	9	15	67	NLHALILVNNK	K	I	0.997	53.7	25	16.4	53.7	0	5	6	0	2	1248.74	7890.76	188551000	106	116
Mudpit_Aged L3 4 Anterior NP IAF	Decorin OS=Homo sapiens GN=DCN PE=1 SV=1	P07585,Q6FH10	DCN	39748.2	9	15	67	SSGIENGAFQGMK	K	K	0.997	82.2	25	18.1	82.2	0	8	0	0	2	1325.62	3850.62	117114000	188	200
Mudpit_Aged L3 4 Anterior NP IAF	Decorin OS=Homo sapiens GN=DCN PE=1 SV=1	P07585,Q6FH10	DCN	39748.2	9	15	67	VSPGAFTPLVK	K	L	0.997	64.9	26.5	17.1	64.9	0	5	0	0	2	1115.65	6407.99	1297690000	120	130
Mudpit_Aged L3 4 Anterior NP IAF	Decorin OS=Homo sapiens GN=DCN PE=1 SV=1	P07585,Q6FH10	DCN	39748.2	9	15	67	VTFNGLNQMIVIELGTNPLK	K	S	0.997	113	25.1	20.1	113	0	2	0	0	2	2201.2	9306.36	19223300	168	187
Mudpit_Aged L3 4 Anterior NP IAF	Decorin OS=Homo sapiens GN=DCN PE=1 SV=1	P07585,Q6FH10	DCN	39748.2	9	15	67	VVQCSDLGLDK	R	V	0.997	57.3	25.4	16.6	57.3	0	2	0	0	2	1234.6	4591.23	12749100	64	74
Mudpit_Aged L3 4 Anterior NP IAF	Decorin OS=Homo sapiens GN=DCN PE=1 SV=1	P07585,Q6FH10	DCN	39748.2	9	15	67	YIQVVYLHNNNISVVGSSDFCPPGHNTK	K	K	0.962	35.9	25.7	15.2	35.9	0	0	0	1	2	3160.52	9208.52	11408600	293	320
Mudpit_Aged L3 4 Anterior NP IAF	HHIP-like protein 1 OS=Homo sapiens GN=HHIPL1 PE=2 SV=1	F1T0G2,F1T0G3,Q96JK4	HHIPL1	86731.7	2	2	4	FEEVDVVER	K	G	0.971	30.9	27.9	14.9	30.9	0	1	0	0	2	1121.55	5174.58	3146910	425	433
Mudpit_Aged L3 4 Anterior NP IAF	HHIP-like protein 1 OS=Homo sapiens GN=HHIPL1 PE=2 SV=1	F1T0G2,F1T0G3,Q96JK4	HHIPL1	86731.7	2	2	4	VVLTSPWEGDER	R	G	0.997	79.8	26.6	21.4	76.4	0	3	0	0	2	1387.69	6160.83	46511100	238	249
Mudpit_Aged L3 4 Anterior NP IAF	Semaphorin-3D OS=Homo sapiens GN=SEMA3D PE=2 SV=2	O95025	SEMA3D	89654.9	2	2	2	SVYPVAGGPTFK	K	R	0.991	32	26.4	15	32	0	1	0	0	2	1222.65	6149.45	4711940	430	441
Mudpit_Aged L3 4 Anterior NP IAF	Semaphorin-3D OS=Homo sapiens GN=SEMA3D PE=2 SV=2	O95025	SEMA3D	89654.9	2	2	2	TEYGLLIR	K	S	0.99	35.7	25	16.6	34.4	0	1	0	0	2	964.546	6100.02	11659300	646	653
Mudpit_Aged L3 4 Anterior NP IAF	cDNA FLJ50237, highly similar to Homo sapiens fibulin 2 (FBLN2), transcript variant 1, mRNA OS=Homo sapiens PE=2 SV=1	B7Z6T9,B7Z9B8,P98095,Q86V58,Q9Y3V7	DKFZp586A1519,FBLN2	126569	2	2	3	DFALDVEMK	R	L	0.975	30.7	25	14.9	30.7	0	2	0	0	2	1067.51	7317.58	6294480	1153	1161
Mudpit_Aged L3 4 Anterior NP IAF	cDNA FLJ50237, highly similar to Homo sapiens fibulin 2 (FBLN2), transcript variant 1, mRNA OS=Homo sapiens PE=2 SV=1	B7Z6T9,B7Z9B8,P98095,Q86V58,Q9Y3V7	DKFZp586A1519,FBLN2	126569	2	2	3	GNEEGYFGTR	K	R	0.997	36.2	25	15.3	36.2	0	1	0	0	2	1129.49	3456.92	4607610	1124	1133
Mudpit_Aged L3 4 Anterior NP IAF	Chondroitin sulfate proteoglycan 2 (Versican), isoform CRA_b OS=Homo sapiens GN=CSPG2 PE=4 SV=1	A0A024RAQ9,P13611,Q59FG9	CSPG2,VCAN	372813	13	20	65	CDVMYGIEDTQDTVSLTVDGVVFHYR	R	A	0.997	75.7	28.7	17.7	75.7	0	0	2	0	2	3020.37	9734.96	1860840	130	155
Mudpit_Aged L3 4 Anterior NP IAF	Chondroitin sulfate proteoglycan 2 (Versican), isoform CRA_b OS=Homo sapiens GN=CSPG2 PE=4 SV=1	A0A024RAQ9,P13611,Q59FG9	CSPG2,VCAN	372813	13	20	65	FTFEEAAK	K	E	0.99	39.5	25	15.5	39.5	0	4	0	0	2	942.457	4491.26	247855000	261	268
Mudpit_Aged L3 4 Anterior NP IAF	Chondroitin sulfate proteoglycan 2 (Versican), isoform CRA_b OS=Homo sapiens GN=CSPG2 PE=4 SV=1	A0A024RAQ9,P13611,Q59FG9	CSPG2,VCAN	372813	13	20	65	LATVGELQAAWR	R	N	0.997	79.2	26.8	17.9	79.2	0	7	2	0	2	1314.72	7936.94	157240000	277	288
Mudpit_Aged L3 4 Anterior NP IAF	Chondroitin sulfate proteoglycan 2 (Versican), isoform CRA_b OS=Homo sapiens GN=CSPG2 PE=4 SV=1	A0A024RAQ9,P13611,Q59FG9	CSPG2,VCAN	372813	13	20	65	LGEPNYGAEIR	R	G	0.997	44.7	26.5	15.8	44.7	0	1	0	0	2	1218.61	4389.35	13795900	1912	1922
Mudpit_Aged L3 4 Anterior NP IAF	Chondroitin sulfate proteoglycan 2 (Versican), isoform CRA_b OS=Homo sapiens GN=CSPG2 PE=4 SV=1	A0A024RAQ9,P13611,Q59FG9	CSPG2,VCAN	372813	13	20	65	LLASDAGLYR	K	C	0.997	72.5	26.6	19.4	70.6	0	7	0	0	2	1078.59	5281.63	275971000	120	129
Mudpit_Aged L3 4 Anterior NP IAF	Chondroitin sulfate proteoglycan 2 (Versican), isoform CRA_b OS=Homo sapiens GN=CSPG2 PE=4 SV=1	A0A024RAQ9,P13611,Q59FG9	CSPG2,VCAN	372813	13	20	65	MSDLSVIGHPIDSESK	R	E	0.997	52.2	25.4	16.3	52.2	0	2	3	0	2	1714.83	6478.14	25877100	1337	1352
Mudpit_Aged L3 4 Anterior NP IAF	Chondroitin sulfate proteoglycan 2 (Versican), isoform CRA_b OS=Homo sapiens GN=CSPG2 PE=4 SV=1	A0A024RAQ9,P13611,Q59FG9	CSPG2,VCAN	372813	13	20	65	NGFDQCDYGWLSDASVR	R	H	0.997	103	25	19.4	103	0	8	4	0	2	1990.82	8816.51	146528000	289	305
Mudpit_Aged L3 4 Anterior NP IAF	Chondroitin sulfate proteoglycan 2 (Versican), isoform CRA_b OS=Homo sapiens GN=CSPG2 PE=4 SV=1	A0A024RAQ9,P13611,Q59FG9	CSPG2,VCAN	372813	13	20	65	QEIESETTSEEQIQEEK	R	S	0.997	83.2	25	18.2	83.2	0	1	2	0	2	2036.91	3862.68	7587600	2108	2124
Mudpit_Aged L3 4 Anterior NP IAF	Chondroitin sulfate proteoglycan 2 (Versican), isoform CRA_b OS=Homo sapiens GN=CSPG2 PE=4 SV=1	A0A024RAQ9,P13611,Q59FG9	CSPG2,VCAN	372813	13	20	65	SPQETYDVYCYVDHLDGDVFHLTVPSK	R	F	0.956	33.3	25	15.1	33.3	0	0	0	1	2	3185.44	9622.65	7710710	234	260
Mudpit_Aged L3 4 Anterior NP IAF	Chondroitin sulfate proteoglycan 2 (Versican), isoform CRA_b OS=Homo sapiens GN=CSPG2 PE=4 SV=1	A0A024RAQ9,P13611,Q59FG9	CSPG2,VCAN	372813	13	20	65	VGHDYQWIGLNDK	R	M	0.997	79.9	26.2	18	79.9	0	1	0	0	2	1544.75	6642.69	26588200	3219	3231
Mudpit_Aged L3 4 Anterior NP IAF	Chondroitin sulfate proteoglycan 2 (Versican), isoform CRA_b OS=Homo sapiens GN=CSPG2 PE=4 SV=1	A0A024RAQ9,P13611,Q59FG9	CSPG2,VCAN	372813	13	20	65	VSVPTHPEAVGDASLTVVK	R	L	0.997	75.3	26.2	17.7	75.3	0	4	8	0	2	1906.03	7067.8	223592000	101	119
Mudpit_Aged L3 4 Anterior NP IAF	Chondroitin sulfate proteoglycan 2 (Versican), isoform CRA_b OS=Homo sapiens GN=CSPG2 PE=4 SV=1	A0A024RAQ9,P13611,Q59FG9	CSPG2,VCAN	372813	13	20	65	YEINSLIR	R	Y	0.99	36.1	27.5	26.8	24.5	0	1	0	0	2	1007.55	6007.95	9737630	3315	3322
Mudpit_Aged L3 4 Anterior NP IAF	Chondroitin sulfate proteoglycan 2 (Versican), isoform CRA_b OS=Homo sapiens GN=CSPG2 PE=4 SV=1	A0A024RAQ9,P13611,Q59FG9	CSPG2,VCAN	372813	13	20	65	YTLNFEAAQK	R	A	0.997	63.1	25.3	25.1	54.9	0	7	0	0	2	1184.59	5326	78176500	161	170
Mudpit_Aged L3 4 Anterior NP IAF	Coagulation factor XII OS=Homo sapiens GN=F12 PE=4 SV=1	A0A0R7FJH5,P00748,Q8IZZ5,Q96EF3	F12	67790.6	2	4	11	LHEAFSPVSYQHDLALLR	R	L	0.997	67	25.3	17.2	67	0	1	4	2	2	2096.09	9818.26	9009610	449	466
Mudpit_Aged L3 4 Anterior NP IAF	Coagulation factor XII OS=Homo sapiens GN=F12 PE=4 SV=1	A0A0R7FJH5,P00748,Q8IZZ5,Q96EF3	F12	67790.6	2	4	11	VVGGLVALR	R	G	0.997	50.8	25	16.2	50.8	0	4	0	0	2	883.572	5878.66	53910100	373	381
Mudpit_Aged L3 4 Anterior NP IAF	cDNA FLJ50077, highly similar to Chordin OS=Homo sapiens PE=2 SV=1	B7Z1H7,E7ESX1,Q9H2X0	CHRD	102030	3	3	3	DLEPELLR	K	H	0.977	29.1	25	14.8	29.1	0	1	0	0	2	984.536	6455.07	11636700	613	620
Mudpit_Aged L3 4 Anterior NP IAF	cDNA FLJ50077, highly similar to Chordin OS=Homo sapiens PE=2 SV=1	B7Z1H7,E7ESX1,Q9H2X0	CHRD	102030	3	3	3	GDGHTDFVALLTGPR	R	S	0.961	33.8	27	15.1	33.8	0	0	1	0	2	1555.79	9228.05	6453170	166	180
Mudpit_Aged L3 4 Anterior NP IAF	cDNA FLJ50077, highly similar to Chordin OS=Homo sapiens PE=2 SV=1	B7Z1H7,E7ESX1,Q9H2X0	CHRD	102030	3	3	3	LQILHQGQLLR	R	E	0.969	35.2	25	20.4	29.9	0	0	1	0	2	1318.8	7608.85	3834880	336	346
Mudpit_Aged L3 4 Anterior NP IAF	Inter-alpha (Globulin) inhibitor H4 (Plasma Kallikrein-sensitive glycoprotein) OS=Homo sapiens GN=ITIH4 PE=2 SV=1	B2RMS9,Q14624	ITIH4	103358	23	37	141	AEAQAQYSAAVAK	K	G	0.997	78.2	27.1	17.9	78.2	0	5	3	0	2	1307.66	2539.85	61084600	99	111
Mudpit_Aged L3 4 Anterior NP IAF	Inter-alpha (Globulin) inhibitor H4 (Plasma Kallikrein-sensitive glycoprotein) OS=Homo sapiens GN=ITIH4 PE=2 SV=1	B2RMS9,Q14624	ITIH4	103358	23	37	141	AGFSWIEVTFK	K	N	0.997	62.3	25.7	16.9	62.3	0	1	0	0	2	1284.66	9197.08	36382900	778	788
Mudpit_Aged L3 4 Anterior NP IAF	Inter-alpha (Globulin) inhibitor H4 (Plasma Kallikrein-sensitive glycoprotein) OS=Homo sapiens GN=ITIH4 PE=2 SV=1	B2RMS9,Q14624	ITIH4	103358	23	37	141	ANTVQEATFQMELPK	R	K	0.997	99.6	26.6	19.2	99.6	0	13	6	0	2	1706.84	7005.85	236008000	61	75
Mudpit_Aged L3 4 Anterior NP IAF	Inter-alpha (Globulin) inhibitor H4 (Plasma Kallikrein-sensitive glycoprotein) OS=Homo sapiens GN=ITIH4 PE=2 SV=1	B2RMS9,Q14624	ITIH4	103358	23	37	141	DQFNLIVFSTEATQWRPSLVPASAENVNK	R	A	0.995	55.6	26.2	16.5	55.6	0	0	1	0	2	3261.65	9421.54	14011800	308	336
Mudpit_Aged L3 4 Anterior NP IAF	Inter-alpha (Globulin) inhibitor H4 (Plasma Kallikrein-sensitive glycoprotein) OS=Homo sapiens GN=ITIH4 PE=2 SV=1	B2RMS9,Q14624	ITIH4	103358	23	37	141	ETLFSVMPGLK	K	M	0.997	60.9	27.8	16.8	60.9	0	9	0	0	2	1221.65	7608.92	289388000	816	826
Mudpit_Aged L3 4 Anterior NP IAF	Inter-alpha (Globulin) inhibitor H4 (Plasma Kallikrein-sensitive glycoprotein) OS=Homo sapiens GN=ITIH4 PE=2 SV=1	B2RMS9,Q14624	ITIH4	103358	23	37	141	FKPTLSQQQK	R	S	0.973	35.4	27.3	15.2	35.4	0	0	1	0	2	1204.67	5088.71	6077230	215	224
Mudpit_Aged L3 4 Anterior NP IAF	Inter-alpha (Globulin) inhibitor H4 (Plasma Kallikrein-sensitive glycoprotein) OS=Homo sapiens GN=ITIH4 PE=2 SV=1	B2RMS9,Q14624	ITIH4	103358	23	37	141	FSSHVGGTLGQFYQEVLWGSPAASDDGR	R	R	0.997	58.8	25	16.7	58.8	0	0	1	0	2	2968.39	9532.71	28569500	867	894
Mudpit_Aged L3 4 Anterior NP IAF	Inter-alpha (Globulin) inhibitor H4 (Plasma Kallikrein-sensitive glycoprotein) OS=Homo sapiens GN=ITIH4 PE=2 SV=1	B2RMS9,Q14624	ITIH4	103358	23	37	141	FSSHVGGTLGQFYQEVLWGSPAASDDGRR	R	T	0.996	63.7	25.9	17	63.7	0	0	2	3	2	3124.49	10506.9	12122400	867	895
Mudpit_Aged L3 4 Anterior NP IAF	Inter-alpha (Globulin) inhibitor H4 (Plasma Kallikrein-sensitive glycoprotein) OS=Homo sapiens GN=ITIH4 PE=2 SV=1	B2RMS9,Q14624	ITIH4	103358	23	37	141	GPDVLTATVSGK	R	L	0.997	66.6	27.1	17.2	66.6	0	8	0	0	2	1144.62	4633.83	684211000	501	512
Mudpit_Aged L3 4 Anterior NP IAF	Inter-alpha (Globulin) inhibitor H4 (Plasma Kallikrein-sensitive glycoprotein) OS=Homo sapiens GN=ITIH4 PE=2 SV=1	B2RMS9,Q14624	ITIH4	103358	23	37	141	ILDDLSPR	K	D	0.99	50.5	25.8	20.9	45.8	0	10	0	0	2	928.51	4545.85	154649000	300	307
Mudpit_Aged L3 4 Anterior NP IAF	Inter-alpha (Globulin) inhibitor H4 (Plasma Kallikrein-sensitive glycoprotein) OS=Homo sapiens GN=ITIH4 PE=2 SV=1	B2RMS9,Q14624	ITIH4	103358	23	37	141	IPKPEASFSPR	K	R	0.991	55.2	25.6	16.5	55.2	0	0	2	0	2	1228.67	4915.15	27087100	634	644
Mudpit_Aged L3 4 Anterior NP IAF	Inter-alpha (Globulin) inhibitor H4 (Plasma Kallikrein-sensitive glycoprotein) OS=Homo sapiens GN=ITIH4 PE=2 SV=1	B2RMS9,Q14624	ITIH4	103358	23	37	141	LALDNGGLAR	K	R	0.997	78.5	25	27.9	68.5	0	3	0	0	2	999.558	4346.49	67412900	429	438
Mudpit_Aged L3 4 Anterior NP IAF	Inter-alpha (Globulin) inhibitor H4 (Plasma Kallikrein-sensitive glycoprotein) OS=Homo sapiens GN=ITIH4 PE=2 SV=1	B2RMS9,Q14624	ITIH4	103358	23	37	141	LGVYELLLK	R	V	0.997	69.6	25	17.4	69.6	0	4	0	0	2	1047.64	9132.08	139652000	154	162
Mudpit_Aged L3 4 Anterior NP IAF	Inter-alpha (Globulin) inhibitor H4 (Plasma Kallikrein-sensitive glycoprotein) OS=Homo sapiens GN=ITIH4 PE=2 SV=1	B2RMS9,Q14624	ITIH4	103358	23	37	141	NGIDIYSLTVDSR	K	V	0.997	80.9	31.3	18.1	80.9	0	1	0	0	2	1452.73	7755.49	28840200	31	43
Mudpit_Aged L3 4 Anterior NP IAF	Inter-alpha (Globulin) inhibitor H4 (Plasma Kallikrein-sensitive glycoprotein) OS=Homo sapiens GN=ITIH4 PE=2 SV=1	B2RMS9,Q14624	ITIH4	103358	23	37	141	NMEQFQVSVSVAPNAK	R	I	0.997	95.2	26.6	19	95.2	0	14	2	0	2	1748.86	6202.01	72021600	124	139
Mudpit_Aged L3 4 Anterior NP IAF	Inter-alpha (Globulin) inhibitor H4 (Plasma Kallikrein-sensitive glycoprotein) OS=Homo sapiens GN=ITIH4 PE=2 SV=1	B2RMS9,Q14624	ITIH4	103358	23	37	141	NPLVWVHASPEHVVVTR	K	N	0.99	44.4	25.5	15.8	44.4	0	0	2	3	2	1940.05	9434.55	181969000	789	805
Mudpit_Aged L3 4 Anterior NP IAF	Inter-alpha (Globulin) inhibitor H4 (Plasma Kallikrein-sensitive glycoprotein) OS=Homo sapiens GN=ITIH4 PE=2 SV=1	B2RMS9,Q14624	ITIH4	103358	23	37	141	NVVFVIDK	K	S	0.99	36.3	29	15.9	35.8	0	2	0	0	2	933.54	6453.17	77483000	274	281
Mudpit_Aged L3 4 Anterior NP IAF	Inter-alpha (Globulin) inhibitor H4 (Plasma Kallikrein-sensitive glycoprotein) OS=Homo sapiens GN=ITIH4 PE=2 SV=1	B2RMS9,Q14624	ITIH4	103358	23	37	141	QGPVNLLSDPEQGVEVTGQYER	R	E	0.997	111	26	19.9	111	0	5	6	0	2	2415.18	7900.42	285727000	754	775
Mudpit_Aged L3 4 Anterior NP IAF	Inter-alpha (Globulin) inhibitor H4 (Plasma Kallikrein-sensitive glycoprotein) OS=Homo sapiens GN=ITIH4 PE=2 SV=1	B2RMS9,Q14624	ITIH4	103358	23	37	141	QLGLPGPPDVPDHAAYHPFR	R	R	0.99	48.8	26.5	16	48.8	0	0	3	2	2	2184.1	9559.54	107885000	669	688
Mudpit_Aged L3 4 Anterior NP IAF	Inter-alpha (Globulin) inhibitor H4 (Plasma Kallikrein-sensitive glycoprotein) OS=Homo sapiens GN=ITIH4 PE=2 SV=1	B2RMS9,Q14624	ITIH4	103358	23	37	141	SPEQQETVLDGNLIIR	K	Y	0.997	106	26.3	19.6	106	0	15	3	0	2	1811.95	7647.21	284328000	225	240
Mudpit_Aged L3 4 Anterior NP IAF	Inter-alpha (Globulin) inhibitor H4 (Plasma Kallikrein-sensitive glycoprotein) OS=Homo sapiens GN=ITIH4 PE=2 SV=1	B2RMS9,Q14624	ITIH4	103358	23	37	141	TGLLLLSDPDK	K	V	0.997	70.3	27	37.2	50.6	0	6	0	0	2	1171.66	7433.27	96735900	832	842
Mudpit_Aged L3 4 Anterior NP IAF	Inter-alpha (Globulin) inhibitor H4 (Plasma Kallikrein-sensitive glycoprotein) OS=Homo sapiens GN=ITIH4 PE=2 SV=1	B2RMS9,Q14624	ITIH4	103358	23	37	141	VRPQQLVK	K	H	0.988	29.8	25	21	23.6	0	1	0	0	2	967.605	6019.66	4346970	163	170
Mudpit_Aged L3 4 Anterior NP IAF	Inter-alpha (Globulin) inhibitor H4 (Plasma Kallikrein-sensitive glycoprotein) OS=Homo sapiens GN=ITIH4 PE=2 SV=1	B2RMS9,Q14624	ITIH4	103358	23	37	141	YIFHNFMER	K	L	0.986	31.9	25	15	31.9	0	4	0	0	2	1256.59	9087.83	57465300	538	546
Mudpit_Aged L3 4 Anterior NP IAF	Heparin cofactor 2 OS=Homo sapiens GN=SERPIND1 PE=1 SV=3	P05546	SERPIND1	57072.9	8	10	23	EYYFAEAQIADFSDPAFISK	R	T	0.997	99.8	25	19.2	99.8	0	3	2	0	2	2312.08	9316.04	61011100	242	261
Mudpit_Aged L3 4 Anterior NP IAF	Heparin cofactor 2 OS=Homo sapiens GN=SERPIND1 PE=1 SV=3	P05546	SERPIND1	57072.9	8	10	23	GGETAQSADPQWEQLNNK	K	N	0.997	78.2	25	17.9	78.2	0	2	0	0	2	1972.9	4651.88	14014100	31	48
Mudpit_Aged L3 4 Anterior NP IAF	Heparin cofactor 2 OS=Homo sapiens GN=SERPIND1 PE=1 SV=3	P05546	SERPIND1	57072.9	8	10	23	GPLDQLEK	K	G	0.99	52	25	30.2	38	0	4	0	0	2	899.484	3788.02	74199300	23	30
Mudpit_Aged L3 4 Anterior NP IAF	Heparin cofactor 2 OS=Homo sapiens GN=SERPIND1 PE=1 SV=3	P05546	SERPIND1	57072.9	8	10	23	NYNLVESLK	K	L	0.995	37.7	27	15.4	37.7	0	2	0	0	2	1079.57	5890.48	37424000	402	410
Mudpit_Aged L3 4 Anterior NP IAF	Heparin cofactor 2 OS=Homo sapiens GN=SERPIND1 PE=1 SV=3	P05546	SERPIND1	57072.9	8	10	23	QFPILLDFK	K	T	0.997	43.7	25.3	15.7	43.7	0	2	0	0	2	1120.64	9220.24	38066500	229	237
Mudpit_Aged L3 4 Anterior NP IAF	Heparin cofactor 2 OS=Homo sapiens GN=SERPIND1 PE=1 SV=3	P05546	SERPIND1	57072.9	8	10	23	SVNDLYIQK	R	Q	0.997	46.8	27	15.9	46.8	0	1	0	0	2	1079.57	4173.23	25337200	220	228
Mudpit_Aged L3 4 Anterior NP IAF	Heparin cofactor 2 OS=Homo sapiens GN=SERPIND1 PE=1 SV=3	P05546	SERPIND1	57072.9	8	10	23	TLEAQLTPR	K	V	0.997	56.8	27.3	17.7	55.7	0	2	0	0	2	1028.57	4134.76	65758800	368	376
Mudpit_Aged L3 4 Anterior NP IAF	Heparin cofactor 2 OS=Homo sapiens GN=SERPIND1 PE=1 SV=3	P05546	SERPIND1	57072.9	8	10	23	YEITTIHNLFR	K	K	0.997	58.5	27.2	16.7	58.5	0	3	2	0	2	1406.74	9286.85	91382400	193	203
Mudpit_Aged L3 4 Anterior NP IAF	Thyroxine-binding globulin OS=Homo sapiens GN=SERPINA7 PE=1 SV=2	P05543	SERPINA7	46325.6	8	8	11	AQWANPFDPSK	K	T	0.997	38.9	25	15.4	38.9	0	3	0	0	2	1260.6	7174.27	20255600	208	218
Mudpit_Aged L3 4 Anterior NP IAF	Thyroxine-binding globulin OS=Homo sapiens GN=SERPINA7 PE=1 SV=2	P05543	SERPINA7	46325.6	8	8	11	EGQMESVEAAMSSK	K	T	0.997	58.8	25	16.7	58.8	0	1	0	0	2	1483.64	5233.78	5287280	274	287
Mudpit_Aged L3 4 Anterior NP IAF	Thyroxine-binding globulin OS=Homo sapiens GN=SERPINA7 PE=1 SV=2	P05543	SERPINA7	46325.6	8	8	11	FSISATYDLGATLLK	K	M	0.997	42.4	26.4	15.6	42.4	0	1	0	0	2	1599.86	9260.85	3255780	308	322
Mudpit_Aged L3 4 Anterior NP IAF	Thyroxine-binding globulin OS=Homo sapiens GN=SERPINA7 PE=1 SV=2	P05543	SERPINA7	46325.6	8	8	11	FTVETPDK	R	N	0.99	48.7	26.4	16	48.7	0	1	0	0	2	936.467	3275.08	14434200	57	64
Mudpit_Aged L3 4 Anterior NP IAF	Thyroxine-binding globulin OS=Homo sapiens GN=SERPINA7 PE=1 SV=2	P05543	SERPINA7	46325.6	8	8	11	GTEAAAVPEVELSDQPENTFLHPIIQIDR	K	S	0.987	42.6	25.1	15.7	42.6	0	0	1	0	2	3189.61	9147.5	8604640	361	389
Mudpit_Aged L3 4 Anterior NP IAF	Thyroxine-binding globulin OS=Homo sapiens GN=SERPINA7 PE=1 SV=2	P05543	SERPINA7	46325.6	8	8	11	NALALFVLPK	K	E	0.997	44.2	25.1	15.8	44.2	0	1	0	0	2	1085.67	9080.83	14038200	264	273
Mudpit_Aged L3 4 Anterior NP IAF	Thyroxine-binding globulin OS=Homo sapiens GN=SERPINA7 PE=1 SV=2	P05543	SERPINA7	46325.6	8	8	11	QEINSHVEMQTK	K	G	0.982	40.5	25	15.5	40.5	0	0	1	0	2	1443.69	3381.25	11972000	171	182
Mudpit_Aged L3 4 Anterior NP IAF	Thyroxine-binding globulin OS=Homo sapiens GN=SERPINA7 PE=1 SV=2	P05543	SERPINA7	46325.6	8	8	11	TEDSSSFLIDK	K	T	0.997	53.7	25	16.4	53.7	0	2	0	0	2	1241.59	5132.15	13995600	219	229
Mudpit_Aged L3 4 Anterior NP IAF	Complement component C8 gamma chain OS=Homo sapiens GN=C8G PE=1 SV=3	P07360	C8G	22277.3	4	8	24	AEATTLHVAPQGTAMAVSTFR	R	K	0.997	83.8	27.8	18.2	83.8	0	2	6	0	2	2159.09	8520.96	46893000	70	90
Mudpit_Aged L3 4 Anterior NP IAF	Complement component C8 gamma chain OS=Homo sapiens GN=C8G PE=1 SV=3	P07360	C8G	22277.3	4	8	24	QLYGDTGVLGR	R	F	0.997	70.2	28.2	17.4	70.2	0	3	0	0	2	1178.62	5114.22	39522300	101	111
Mudpit_Aged L3 4 Anterior NP IAF	Complement component C8 gamma chain OS=Homo sapiens GN=C8G PE=1 SV=3	P07360	C8G	22277.3	4	8	24	SLPVSDSVLSGFEQR	R	V	0.997	72.2	27.7	17.5	72.2	0	6	1	0	2	1620.82	7832.92	75696500	154	168
Mudpit_Aged L3 4 Anterior NP IAF	Complement component C8 gamma chain OS=Homo sapiens GN=C8G PE=1 SV=3	P07360	C8G	22277.3	4	8	24	VQEAHLTEDQIFYFPK	R	Y	0.997	108	25.7	19.7	108	0	1	5	0	2	1964.98	9145.95	96032000	169	184
Mudpit_Aged L3 4 Anterior NP IAF	cDNA FLJ55329, highly similar to Procollagen-lysine,2-oxoglutarate5-dioxygenase 2 (EC 1.14.11.4) OS=Homo sapiens PE=2 SV=1	B4DHG3,E7ETU9,O00469	PLOD2	84687.4	2	2	2	IVGPEENLSQAEAR	K	N	0.997	74.3	26	17.6	74.3	0	1	0	0	2	1512.77	4522.07	8723680	359	372
Mudpit_Aged L3 4 Anterior NP IAF	cDNA FLJ55329, highly similar to Procollagen-lysine,2-oxoglutarate5-dioxygenase 2 (EC 1.14.11.4) OS=Homo sapiens PE=2 SV=1	B4DHG3,E7ETU9,O00469	PLOD2	84687.4	2	2	2	SEDYVDIVQGNR	R	V	0.997	54.7	25	16.4	54.7	0	1	0	0	2	1394.65	5577.89	5024430	441	452
Mudpit_Aged L3 4 Anterior NP IAF	SPARC related modular calcium binding 1, isoform CRA_b OS=Homo sapiens GN=SMOC1 PE=4 SV=1	A0A024R6E0,Q9H4F8	SMOC1	48162.5	5	7	9	FSEPDPSHTLEER	R	V	0.984	39.1	25	15.4	39.1	0	0	1	0	2	1543.7	5295.36	17098300	350	362
Mudpit_Aged L3 4 Anterior NP IAF	SPARC related modular calcium binding 1, isoform CRA_b OS=Homo sapiens GN=SMOC1 PE=4 SV=1	A0A024R6E0,Q9H4F8	SMOC1	48162.5	5	7	9	QSALEEAQQNPR	R	E	0.997	68.4	25	17.3	68.4	0	1	1	0	2	1370.67	2500.69	8535200	232	243
Mudpit_Aged L3 4 Anterior NP IAF	SPARC related modular calcium binding 1, isoform CRA_b OS=Homo sapiens GN=SMOC1 PE=4 SV=1	A0A024R6E0,Q9H4F8	SMOC1	48162.5	5	7	9	TTEADDPFKDR	K	E	0.996	58.7	25	16.7	58.7	0	2	1	0	2	1294.59	5137.75	32260100	300	310
Mudpit_Aged L3 4 Anterior NP IAF	SPARC related modular calcium binding 1, isoform CRA_b OS=Homo sapiens GN=SMOC1 PE=4 SV=1	A0A024R6E0,Q9H4F8	SMOC1	48162.5	5	7	9	VISLPELK	K	G	0.99	41	25	27	29.5	0	2	0	0	2	898.561	7141.82	11128600	415	422
Mudpit_Aged L3 4 Anterior NP IAF	SPARC related modular calcium binding 1, isoform CRA_b OS=Homo sapiens GN=SMOC1 PE=4 SV=1	A0A024R6E0,Q9H4F8	SMOC1	48162.5	5	7	9	VVHWYFSQLDSNSSNDINK	R	R	0.97	36.4	29.2	15.3	36.4	0	0	1	0	2	2253.06	9096.49	5511360	363	381
Mudpit_Aged L3 4 Anterior NP IAF	cDNA FLJ77947, highly similar to Human complement protein C8 beta subunit mRNA OS=Homo sapiens PE=2 SV=1	A8K9M5,B7Z550,B7Z555,B7ZA94,F5GY80,F5H7G1,P07358	C8B	67046.9	13	16	22	DFGTHYITEAVLGGIYEYTLVMNK	R	E	0.967	32	25.4	15	32	0	0	1	0	2	2750.34	9774.31	1495630	339	362
Mudpit_Aged L3 4 Anterior NP IAF	cDNA FLJ77947, highly similar to Human complement protein C8 beta subunit mRNA OS=Homo sapiens PE=2 SV=1	A8K9M5,B7Z550,B7Z555,B7ZA94,F5GY80,F5H7G1,P07358	C8B	67046.9	13	16	22	DTMVEDLVVLVR	R	G	0.997	86.4	27.8	18.4	86.4	0	2	0	0	2	1388.75	8965.25	91951600	417	428
Mudpit_Aged L3 4 Anterior NP IAF	cDNA FLJ77947, highly similar to Human complement protein C8 beta subunit mRNA OS=Homo sapiens PE=2 SV=1	A8K9M5,B7Z550,B7Z555,B7ZA94,F5GY80,F5H7G1,P07358	C8B	67046.9	13	16	22	EYESYSDFER	K	N	0.997	45	25	15.8	45	0	2	0	0	2	1324.53	4891.94	135987000	233	242
Mudpit_Aged L3 4 Anterior NP IAF	cDNA FLJ77947, highly similar to Human complement protein C8 beta subunit mRNA OS=Homo sapiens PE=2 SV=1	A8K9M5,B7Z550,B7Z555,B7ZA94,F5GY80,F5H7G1,P07358	C8B	67046.9	13	16	22	GGASEHITTLAYQELPTADLMQEWGDAVQYNPAIIK	R	V	0.972	44.9	30.8	15.8	44.9	0	0	0	1	2	3930.92	9650.61	2137940	429	464
Mudpit_Aged L3 4 Anterior NP IAF	cDNA FLJ77947, highly similar to Human complement protein C8 beta subunit mRNA OS=Homo sapiens PE=2 SV=1	A8K9M5,B7Z550,B7Z555,B7ZA94,F5GY80,F5H7G1,P07358	C8B	67046.9	13	16	22	GILNEIKDR	R	N	0.975	44.4	26.8	20.9	39.3	0	0	1	0	2	1057.6	6427.79	3052980	405	413
Mudpit_Aged L3 4 Anterior NP IAF	cDNA FLJ77947, highly similar to Human complement protein C8 beta subunit mRNA OS=Homo sapiens PE=2 SV=1	A8K9M5,B7Z550,B7Z555,B7ZA94,F5GY80,F5H7G1,P07358	C8B	67046.9	13	16	22	IPGIFELGISSQSDR	K	G	0.997	65.5	29.5	17.1	65.5	0	2	1	0	2	1618.84	9065.68	57858100	260	274
Mudpit_Aged L3 4 Anterior NP IAF	cDNA FLJ77947, highly similar to Human complement protein C8 beta subunit mRNA OS=Homo sapiens PE=2 SV=1	A8K9M5,B7Z550,B7Z555,B7ZA94,F5GY80,F5H7G1,P07358	C8B	67046.9	13	16	22	KPYNVESYTPQTQGK	R	Y	0.997	107	26.2	19.7	107	0	2	1	0	2	1739.86	4310.55	20707000	212	226
Mudpit_Aged L3 4 Anterior NP IAF	cDNA FLJ77947, highly similar to Human complement protein C8 beta subunit mRNA OS=Homo sapiens PE=2 SV=1	A8K9M5,B7Z550,B7Z555,B7ZA94,F5GY80,F5H7G1,P07358	C8B	67046.9	13	16	22	LPLEYSYGEYR	R	D	0.997	47.5	26.4	16	47.5	0	2	0	0	2	1389.67	6543.63	48912700	324	334
Mudpit_Aged L3 4 Anterior NP IAF	cDNA FLJ77947, highly similar to Human complement protein C8 beta subunit mRNA OS=Homo sapiens PE=2 SV=1	A8K9M5,B7Z550,B7Z555,B7ZA94,F5GY80,F5H7G1,P07358	C8B	67046.9	13	16	22	QALEEFQK	K	E	0.99	50.9	27.9	23.9	43.2	0	2	0	0	2	992.505	3298.14	19906800	491	498
Mudpit_Aged L3 4 Anterior NP IAF	cDNA FLJ77947, highly similar to Human complement protein C8 beta subunit mRNA OS=Homo sapiens PE=2 SV=1	A8K9M5,B7Z550,B7Z555,B7ZA94,F5GY80,F5H7G1,P07358	C8B	67046.9	13	16	22	RDTMVEDLVVLVR	K	G	0.989	48.4	26	16	48.4	0	0	1	0	2	1544.85	9457.09	3304090	416	428
Mudpit_Aged L3 4 Anterior NP IAF	cDNA FLJ77947, highly similar to Human complement protein C8 beta subunit mRNA OS=Homo sapiens PE=2 SV=1	A8K9M5,B7Z550,B7Z555,B7ZA94,F5GY80,F5H7G1,P07358	C8B	67046.9	13	16	22	SDLEVAHYK	R	L	0.997	70.4	27.4	17.4	70.4	0	2	0	0	2	1061.53	4380.25	19246900	297	305
Mudpit_Aged L3 4 Anterior NP IAF	cDNA FLJ77947, highly similar to Human complement protein C8 beta subunit mRNA OS=Homo sapiens PE=2 SV=1	A8K9M5,B7Z550,B7Z555,B7ZA94,F5GY80,F5H7G1,P07358	C8B	67046.9	13	16	22	SGFSFGFK	K	I	0.962	26.4	25.1	14.6	26.4	0	1	0	0	2	876.425	7720.88	5151740	252	259
Mudpit_Aged L3 4 Anterior NP IAF	cDNA FLJ77947, highly similar to Human complement protein C8 beta subunit mRNA OS=Homo sapiens PE=2 SV=1	A8K9M5,B7Z550,B7Z555,B7ZA94,F5GY80,F5H7G1,P07358	C8B	67046.9	13	16	22	SLMLHYEFLQR	R	V	0.997	42.5	26.7	15.7	42.5	0	1	0	0	2	1436.74	9213.47	7565960	310	320
Mudpit_Aged L3 4 Anterior NP IAF	Complement component C8 alpha chain OS=Homo sapiens GN=C8A PE=1 SV=2	P07357	C8A	65163.8	5	7	16	ALDQYLMEFNACR	R	C	0.997	46	25	15.9	46	0	2	0	0	2	1647.71	8359.68	8251080	486	498
Mudpit_Aged L3 4 Anterior NP IAF	Complement component C8 alpha chain OS=Homo sapiens GN=C8A PE=1 SV=2	P07357	C8A	65163.8	5	7	16	AMAVEDIISR	K	V	0.997	45.7	27.4	16.4	45.2	0	1	0	0	2	1120.57	4576.77	10626100	413	422
Mudpit_Aged L3 4 Anterior NP IAF	Complement component C8 alpha chain OS=Homo sapiens GN=C8A PE=1 SV=2	P07357	C8A	65163.8	5	7	16	HTSLGPLEAK	R	R	0.997	65.6	25.1	24.5	58.2	0	4	0	0	2	1052.57	4423.28	43229700	470	479
Mudpit_Aged L3 4 Anterior NP IAF	Complement component C8 alpha chain OS=Homo sapiens GN=C8A PE=1 SV=2	P07357	C8A	65163.8	5	7	16	MESLGITSR	K	D	0.997	50.2	27.9	16.1	50.2	0	6	0	0	2	993.503	3150.39	44567500	362	370
Mudpit_Aged L3 4 Anterior NP IAF	Complement component C8 alpha chain OS=Homo sapiens GN=C8A PE=1 SV=2	P07357	C8A	65163.8	5	7	16	YNPVVIDFEMQPIHEVLR	K	H	0.985	44.2	26.9	15.8	44.2	0	0	3	0	2	2215.12	9287.86	64534100	452	469
Mudpit_Aged L3 4 Anterior NP IAF	Cytokine receptor-like factor 1 OS=Homo sapiens GN=CRLF1 PE=1 SV=1	O75462	CRLF1	46302.2	4	4	6	AGIWSEWSHPTAASTPR	K	S	0.98	39.1	25.6	15.4	39.1	0	0	1	0	2	1853.89	8909.59	4362850	324	340
Mudpit_Aged L3 4 Anterior NP IAF	Cytokine receptor-like factor 1 OS=Homo sapiens GN=CRLF1 PE=1 SV=1	O75462	CRLF1	46302.2	4	4	6	NQDEGILPSGR	R	R	0.982	30.2	26.1	14.9	30.2	0	1	0	0	2	1185.59	3679.27	4303330	403	413
Mudpit_Aged L3 4 Anterior NP IAF	Cytokine receptor-like factor 1 OS=Homo sapiens GN=CRLF1 PE=1 SV=1	O75462	CRLF1	46302.2	4	4	6	VEDSVDWK	R	V	0.99	54.7	25.8	21.7	49.4	0	2	0	0	2	977.457	3552.18	8539160	278	285
Mudpit_Aged L3 4 Anterior NP IAF	Cytokine receptor-like factor 1 OS=Homo sapiens GN=CRLF1 PE=1 SV=1	O75462	CRLF1	46302.2	4	4	6	VGGLEDQLSVR	R	W	0.997	63.4	26.4	17	63.4	0	2	0	0	2	1172.63	4998.11	19229400	246	256
Mudpit_Aged L3 4 Anterior NP IAF	Lysyl oxidase homolog 4 OS=Homo sapiens GN=LOXL4 PE=1 SV=1	Q96JB6	LOXL4	84480.6	3	3	3	LGQGLGPIHLSEVR	R	C	0.979	47.2	25.4	15.9	47.2	0	0	1	0	2	1475.83	8978.76	4780290	366	379
Mudpit_Aged L3 4 Anterior NP IAF	Lysyl oxidase homolog 4 OS=Homo sapiens GN=LOXL4 PE=1 SV=1	Q96JB6	LOXL4	84480.6	3	3	3	LVGPESKPEEGR	R	L	0.97	38.1	25.5	15.4	38.1	0	0	1	0	2	1297.67	2790.35	2486200	34	45
Mudpit_Aged L3 4 Anterior NP IAF	Lysyl oxidase homolog 4 OS=Homo sapiens GN=LOXL4 PE=1 SV=1	Q96JB6	LOXL4	84480.6	3	3	3	YGQGEGPIWLDNVR	K	C	0.962	25.2	25.5	14.6	25.2	0	1	0	0	2	1603.79	7501.86	12678600	88	101
Mudpit_Aged L3 4 Anterior NP IAF	Collagen alpha-1(XII) chain OS=Homo sapiens GN=COL12A1 PE=1 SV=1	D6RGG3,Q99715	COL12A1	333145	25	25	30	DLSFSEVTSYGFK	K	T	0.997	56.8	26.4	16.6	56.8	0	1	0	0	2	1479.7	8496.05	5930180	637	649
Mudpit_Aged L3 4 Anterior NP IAF	Collagen alpha-1(XII) chain OS=Homo sapiens GN=COL12A1 PE=1 SV=1	D6RGG3,Q99715	COL12A1	333145	25	25	30	GDTTNTVLQGLK	R	E	0.997	70.8	27.2	17.4	70.8	0	1	0	0	2	1246.66	5146.39	6008110	863	874
Mudpit_Aged L3 4 Anterior NP IAF	Collagen alpha-1(XII) chain OS=Homo sapiens GN=COL12A1 PE=1 SV=1	D6RGG3,Q99715	COL12A1	333145	25	25	30	GEVQTVTFDTEEVK	R	T	0.997	74.1	26.1	17.6	74.1	0	2	0	0	2	1581.76	5852.59	10847400	2628	2641
Mudpit_Aged L3 4 Anterior NP IAF	Collagen alpha-1(XII) chain OS=Homo sapiens GN=COL12A1 PE=1 SV=1	D6RGG3,Q99715	COL12A1	333145	25	25	30	GPGDLEAPSNLVISER	K	T	0.997	79	27	17.9	79	0	1	0	0	2	1653.84	6730.37	9817100	1381	1396
Mudpit_Aged L3 4 Anterior NP IAF	Collagen alpha-1(XII) chain OS=Homo sapiens GN=COL12A1 PE=1 SV=1	D6RGG3,Q99715	COL12A1	333145	25	25	30	GTWDHGASDVSLYR	R	I	0.972	38.8	25	15.4	38.8	0	0	2	0	2	1563.72	6196.64	11400100	1673	1686
Mudpit_Aged L3 4 Anterior NP IAF	Collagen alpha-1(XII) chain OS=Homo sapiens GN=COL12A1 PE=1 SV=1	D6RGG3,Q99715	COL12A1	333145	25	25	30	ITEVTSEGFR	K	G	0.996	42.6	30	15.7	42.6	0	1	0	0	2	1138.57	3967.27	12551200	1663	1672
Mudpit_Aged L3 4 Anterior NP IAF	Collagen alpha-1(XII) chain OS=Homo sapiens GN=COL12A1 PE=1 SV=1	D6RGG3,Q99715	COL12A1	333145	25	25	30	ITVDPTTDGPTK	R	E	0.997	50.5	28.2	16.2	50.5	0	2	0	0	2	1244.64	3002.43	9855920	57	68
Mudpit_Aged L3 4 Anterior NP IAF	Collagen alpha-1(XII) chain OS=Homo sapiens GN=COL12A1 PE=1 SV=1	D6RGG3,Q99715	COL12A1	333145	25	25	30	ITWTQAPGR	K	V	0.994	35.7	26.7	15.2	35.7	0	1	0	0	2	1029.55	4361.27	6180470	741	749
Mudpit_Aged L3 4 Anterior NP IAF	Collagen alpha-1(XII) chain OS=Homo sapiens GN=COL12A1 PE=1 SV=1	D6RGG3,Q99715	COL12A1	333145	25	25	30	ITYQPSTGEGNEQTTTIGGR	R	Q	0.997	88.5	25.9	18.5	88.5	0	2	0	0	2	2110.01	4099.29	6284420	1785	1804
Mudpit_Aged L3 4 Anterior NP IAF	Collagen alpha-1(XII) chain OS=Homo sapiens GN=COL12A1 PE=1 SV=1	D6RGG3,Q99715	COL12A1	333145	25	25	30	IVEVFDIGPK	R	R	0.996	35.5	26.2	26.4	24.3	0	1	0	0	2	1116.63	8052.81	8233610	1225	1234
Mudpit_Aged L3 4 Anterior NP IAF	Collagen alpha-1(XII) chain OS=Homo sapiens GN=COL12A1 PE=1 SV=1	D6RGG3,Q99715	COL12A1	333145	25	25	30	LLPETPSDPFAIWQITDR	R	D	0.997	65	27.1	17.1	65	0	1	0	0	2	2099.08	9345.54	13362800	2585	2602
Mudpit_Aged L3 4 Anterior NP IAF	Collagen alpha-1(XII) chain OS=Homo sapiens GN=COL12A1 PE=1 SV=1	D6RGG3,Q99715	COL12A1	333145	25	25	30	LNWNPSPSPVTGYK	K	V	0.997	61.9	26.8	16.9	61.9	0	2	0	0	2	1559.79	6613.54	6118970	352	365
Mudpit_Aged L3 4 Anterior NP IAF	Collagen alpha-1(XII) chain OS=Homo sapiens GN=COL12A1 PE=1 SV=1	D6RGG3,Q99715	COL12A1	333145	25	25	30	MIATDPDDTHAYNVADFESLSR	K	I	0.995	66.1	25	17.1	66.1	0	0	1	0	2	2468.1	7998.15	9113350	1345	1366
Mudpit_Aged L3 4 Anterior NP IAF	Collagen alpha-1(XII) chain OS=Homo sapiens GN=COL12A1 PE=1 SV=1	D6RGG3,Q99715	COL12A1	333145	25	25	30	NFASVQGVSLESGSFPSYSAYR	K	I	0.997	95.5	25.5	19	95.5	0	1	0	0	2	2353.11	8880.33	3809940	2533	2554
Mudpit_Aged L3 4 Anterior NP IAF	Collagen alpha-1(XII) chain OS=Homo sapiens GN=COL12A1 PE=1 SV=1	D6RGG3,Q99715	COL12A1	333145	25	25	30	NLQPDTSYTVTVVPVYTEGDGGR	R	T	0.997	92.7	26	18.8	92.7	0	1	0	0	2	2468.19	7649.2	7030330	1902	1924
Mudpit_Aged L3 4 Anterior NP IAF	Collagen alpha-1(XII) chain OS=Homo sapiens GN=COL12A1 PE=1 SV=1	D6RGG3,Q99715	COL12A1	333145	25	25	30	SFEISPNR	K	V	0.99	46.3	29	15.9	46.3	0	1	0	0	2	949.474	3534.24	6362450	469	476
Mudpit_Aged L3 4 Anterior NP IAF	Collagen alpha-1(XII) chain OS=Homo sapiens GN=COL12A1 PE=1 SV=1	D6RGG3,Q99715	COL12A1	333145	25	25	30	SLYDDVDTGEK	K	N	0.997	40.5	25	15.5	40.5	0	1	0	0	2	1241.55	4313.22	5330130	941	951
Mudpit_Aged L3 4 Anterior NP IAF	Collagen alpha-1(XII) chain OS=Homo sapiens GN=COL12A1 PE=1 SV=1	D6RGG3,Q99715	COL12A1	333145	25	25	30	SQDEVEIPAR	K	E	0.997	52.4	25	16.3	52.4	0	1	0	0	2	1143.56	3910.82	9038950	253	262
Mudpit_Aged L3 4 Anterior NP IAF	Collagen alpha-1(XII) chain OS=Homo sapiens GN=COL12A1 PE=1 SV=1	D6RGG3,Q99715	COL12A1	333145	25	25	30	TEFNLNQYYQR	R	D	0.983	33.3	26.2	15.1	33.3	0	1	0	0	2	1475.69	6204.44	4538280	190	200
Mudpit_Aged L3 4 Anterior NP IAF	Collagen alpha-1(XII) chain OS=Homo sapiens GN=COL12A1 PE=1 SV=1	D6RGG3,Q99715	COL12A1	333145	25	25	30	TLENLIPDTK	R	Y	0.997	59	34.5	16.7	59	0	1	0	0	2	1143.63	6161.67	9878790	778	787
Mudpit_Aged L3 4 Anterior NP IAF	Collagen alpha-1(XII) chain OS=Homo sapiens GN=COL12A1 PE=1 SV=1	D6RGG3,Q99715	COL12A1	333145	25	25	30	VEYYPVSGGK	K	R	0.993	34.4	25	15.2	34.4	0	1	0	0	2	1098.55	3447.73	2302110	1417	1426
Mudpit_Aged L3 4 Anterior NP IAF	Collagen alpha-1(XII) chain OS=Homo sapiens GN=COL12A1 PE=1 SV=1	D6RGG3,Q99715	COL12A1	333145	25	25	30	VLVVVTDGR	K	S	0.997	39.4	26.6	22	32.9	0	1	0	0	2	957.573	4214.08	9051120	2428	2436
Mudpit_Aged L3 4 Anterior NP IAF	Collagen alpha-1(XII) chain OS=Homo sapiens GN=COL12A1 PE=1 SV=1	D6RGG3,Q99715	COL12A1	333145	25	25	30	VQIALAQYSGDPR	R	T	0.997	79.9	27.1	18	79.9	0	1	0	0	2	1417.74	5527.56	9289400	1236	1248
Mudpit_Aged L3 4 Anterior NP IAF	Collagen alpha-1(XII) chain OS=Homo sapiens GN=COL12A1 PE=1 SV=1	D6RGG3,Q99715	COL12A1	333145	25	25	30	VSWDPSPSPVLGYK	R	I	0.997	48.6	27.2	16	48.6	0	1	0	0	2	1531.78	7769.57	5478740	2134	2147
Mudpit_Aged L3 4 Anterior NP IAF	Collagen alpha-1(XII) chain OS=Homo sapiens GN=COL12A1 PE=1 SV=1	D6RGG3,Q99715	COL12A1	333145	25	25	30	WDPAPGPVLQYR	R	V	0.994	35.8	25.6	15.2	35.8	0	1	0	0	2	1398.72	7491.69	5020690	1954	1965
Mudpit_Aged L3 4 Anterior NP IAF	Complement C4-A OS=Homo sapiens GN=C4A PE=1 SV=1	A0A0G2JPR0	C4A	192877	39	55	182	ADGSYAAWLSR	K	D	0.997	83	25.2	18.2	83	0	3	0	0	2	1196.57	6505.17	171074000	1062	1072
Mudpit_Aged L3 4 Anterior NP IAF	Complement C4-A OS=Homo sapiens GN=C4A PE=1 SV=1	A0A0G2JPR0	C4A	192877	39	55	182	AEFQDALEK	K	L	0.997	53.6	26.4	16.3	53.6	0	2	0	0	2	1050.51	4745.15	81800500	317	325
Mudpit_Aged L3 4 Anterior NP IAF	Complement C4-A OS=Homo sapiens GN=C4A PE=1 SV=1	A0A0G2JPR0	C4A	192877	39	55	182	AEMADQAAAWLTR	K	Q	0.997	98.3	25.1	34.8	82.6	0	8	3	0	2	1449.68	7419.46	150417000	1279	1291
Mudpit_Aged L3 4 Anterior NP IAF	Complement C4-A OS=Homo sapiens GN=C4A PE=1 SV=1	A0A0G2JPR0	C4A	192877	39	55	182	ALEILQEEDLIDEDDIPVR	R	S	0.997	122	27.4	20.6	122	0	2	1	0	2	2225.12	9153.78	106585000	757	775
Mudpit_Aged L3 4 Anterior NP IAF	Complement C4-A OS=Homo sapiens GN=C4A PE=1 SV=1	A0A0G2JPR0	C4A	192877	39	55	182	DFALLSLQVPLK	R	D	0.997	67.1	25	17.2	67.1	0	2	0	0	2	1343.79	9266.33	80585600	81	92
Mudpit_Aged L3 4 Anterior NP IAF	Complement C4-A OS=Homo sapiens GN=C4A PE=1 SV=1	A0A0G2JPR0	C4A	192877	39	55	182	DHAVDLIQK	K	G	0.997	59.2	25.2	23.3	52.6	0	4	0	0	2	1038.56	4132.15	68558500	1043	1051
Mudpit_Aged L3 4 Anterior NP IAF	Complement C4-A OS=Homo sapiens GN=C4A PE=1 SV=1	A0A0G2JPR0	C4A	192877	39	55	182	DSSTWLTAFVLK	R	V	0.997	61.6	26.6	16.9	61.6	0	2	0	0	2	1367.72	9334.53	45040100	1073	1084
Mudpit_Aged L3 4 Anterior NP IAF	Complement C4-A OS=Homo sapiens GN=C4A PE=1 SV=1	A0A0G2JPR0	C4A	192877	39	55	182	EELVYELNPLDHR	R	G	0.997	97.3	26.4	19.1	97.3	0	2	1	0	2	1626.81	9088.68	101341000	942	954
Mudpit_Aged L3 4 Anterior NP IAF	Complement C4-A OS=Homo sapiens GN=C4A PE=1 SV=1	A0A0G2JPR0	C4A	192877	39	55	182	EMSGSPASGIPVK	R	V	0.997	59.2	25.6	16.7	59.2	0	9	0	0	2	1259.63	3251.63	90975800	392	404
Mudpit_Aged L3 4 Anterior NP IAF	Complement C4-A OS=Homo sapiens GN=C4A PE=1 SV=1	A0A0G2JPR0	C4A	192877	39	55	182	EVYMPSSIFQDDFVIPDISEPGTWK	K	I	0.995	43	25.6	15.7	43	0	1	1	0	2	2916.37	9458.15	25946200	190	214
Mudpit_Aged L3 4 Anterior NP IAF	Complement C4-A OS=Homo sapiens GN=C4A PE=1 SV=1	A0A0G2JPR0	C4A	192877	39	55	182	FEQLELRPVLYNYLDK	R	N	0.997	62	26.5	16.9	62	0	1	0	0	2	2040.08	9478.48	5467010	846	861
Mudpit_Aged L3 4 Anterior NP IAF	Complement C4-A OS=Homo sapiens GN=C4A PE=1 SV=1	A0A0G2JPR0	C4A	192877	39	55	182	FGLLDEDGK	R	K	0.997	41.5	25.9	15.6	41.5	0	3	0	0	2	993.489	5775.63	23684800	284	292
Mudpit_Aged L3 4 Anterior NP IAF	Complement C4-A OS=Homo sapiens GN=C4A PE=1 SV=1	A0A0G2JPR0	C4A	192877	39	55	182	FGLLDEDGKK	R	T	0.991	44.7	27.3	15.8	44.7	0	1	1	0	2	1121.58	5018.98	44906900	284	293
Mudpit_Aged L3 4 Anterior NP IAF	Complement C4-A OS=Homo sapiens GN=C4A PE=1 SV=1	A0A0G2JPR0	C4A	192877	39	55	182	GCGEQTMIYLAPTLAASR	R	Y	0.997	51.6	25.5	16.2	51.6	0	3	0	0	2	1955.92	7680.98	20005800	1009	1026
Mudpit_Aged L3 4 Anterior NP IAF	Complement C4-A OS=Homo sapiens GN=C4A PE=1 SV=1	A0A0G2JPR0	C4A	192877	39	55	182	GHLFLQTDQPIYNPGQR	R	V	0.994	54.2	26.4	16.4	54.2	0	0	3	0	2	1984	8937.42	31480800	139	155
Mudpit_Aged L3 4 Anterior NP IAF	Complement C4-A OS=Homo sapiens GN=C4A PE=1 SV=1	A0A0G2JPR0	C4A	192877	39	55	182	GLEEELQFSLGSK	R	I	0.997	61.9	26.1	16.9	61.9	0	1	0	0	2	1436.73	8343.79	78508600	1353	1365
Mudpit_Aged L3 4 Anterior NP IAF	Complement C4-A OS=Homo sapiens GN=C4A PE=1 SV=1	A0A0G2JPR0	C4A	192877	39	55	182	GLQDEDGYR	R	M	0.996	36.1	25	26.1	25.3	0	2	0	0	2	1052.46	2549.97	5641190	1605	1613
Mudpit_Aged L3 4 Anterior NP IAF	Complement C4-A OS=Homo sapiens GN=C4A PE=1 SV=1	A0A0G2JPR0	C4A	192877	39	55	182	GPEVQLVAHSPWLK	R	D	0.997	96.5	25.3	19	96.5	0	1	3	0	2	1560.85	9110.8	75810400	105	118
Mudpit_Aged L3 4 Anterior NP IAF	Complement C4-A OS=Homo sapiens GN=C4A PE=1 SV=1	A0A0G2JPR0	C4A	192877	39	55	182	GQIVFMNR	R	E	0.99	34.8	25	15.2	34.8	0	1	0	0	2	964.503	5147.54	14115100	513	520
Mudpit_Aged L3 4 Anterior NP IAF	Complement C4-A OS=Homo sapiens GN=C4A PE=1 SV=1	A0A0G2JPR0	C4A	192877	39	55	182	GSFEFPVGDAVSK	R	V	0.991	31.4	25.9	15	31.4	0	1	0	0	2	1339.65	6666	35449400	917	929
Mudpit_Aged L3 4 Anterior NP IAF	Complement C4-A OS=Homo sapiens GN=C4A PE=1 SV=1	A0A0G2JPR0	C4A	192877	39	55	182	HLVPGAPFLLQALVR	R	E	0.996	62.4	25	16.9	62.4	0	0	8	0	2	1630.98	9948.99	32106000	377	391
Mudpit_Aged L3 4 Anterior NP IAF	Complement C4-A OS=Homo sapiens GN=C4A PE=1 SV=1	A0A0G2JPR0	C4A	192877	39	55	182	ITQVLHFTK	K	D	0.997	53.7	28	16.4	53.7	0	1	0	0	2	1086.63	5429.67	9726170	1647	1655
Mudpit_Aged L3 4 Anterior NP IAF	Complement C4-A OS=Homo sapiens GN=C4A PE=1 SV=1	A0A0G2JPR0	C4A	192877	39	55	182	LELSVDGAK	K	Q	0.997	54.4	28.1	29.5	41.2	0	4	0	0	2	931.51	4364.31	44719100	571	579
Mudpit_Aged L3 4 Anterior NP IAF	Complement C4-A OS=Homo sapiens GN=C4A PE=1 SV=1	A0A0G2JPR0	C4A	192877	39	55	182	LGQYASPTAK	K	R	0.994	36.8	28	30.6	21.5	0	1	0	0	2	1035.55	2417.83	3873510	691	700
Mudpit_Aged L3 4 Anterior NP IAF	Complement C4-A OS=Homo sapiens GN=C4A PE=1 SV=1	A0A0G2JPR0	C4A	192877	39	55	182	LNMGITDLQGLR	K	L	0.997	69	26.6	23.9	62.5	0	11	0	0	2	1330.71	8092.19	185461000	326	337
Mudpit_Aged L3 4 Anterior NP IAF	Complement C4-A OS=Homo sapiens GN=C4A PE=1 SV=1	A0A0G2JPR0	C4A	192877	39	55	182	SFFPENWLWR	R	V	0.997	50	26.8	22.6	43.5	0	1	0	0	2	1381.67	9324	23089600	776	785
Mudpit_Aged L3 4 Anterior NP IAF	Complement C4-A OS=Homo sapiens GN=C4A PE=1 SV=1	A0A0G2JPR0	C4A	192877	39	55	182	STQDTVIALDALSAYWIASHTTEER	R	G	0.997	118	28.6	20.4	118	0	3	36	0	2	2778.36	9934.34	200554000	1301	1325
Mudpit_Aged L3 4 Anterior NP IAF	Complement C4-A OS=Homo sapiens GN=C4A PE=1 SV=1	A0A0G2JPR0	C4A	192877	39	55	182	TEQWSTLPPETK	K	D	0.997	55.1	26.2	16.4	55.1	0	8	0	0	2	1416.7	5094.08	122008000	1031	1042
Mudpit_Aged L3 4 Anterior NP IAF	Complement C4-A OS=Homo sapiens GN=C4A PE=1 SV=1	A0A0G2JPR0	C4A	192877	39	55	182	TLEIPGNSDPNMIPDGDFNSYVR	R	V	0.997	93.6	25	18.8	93.6	0	5	1	0	2	2551.18	8402.44	89505100	957	979
Mudpit_Aged L3 4 Anterior NP IAF	Complement C4-A OS=Homo sapiens GN=C4A PE=1 SV=1	A0A0G2JPR0	C4A	192877	39	55	182	TTNIQGINLLFSSR	R	R	0.997	73.2	25.9	17.6	73.2	0	3	0	0	2	1563.85	8799.83	82782900	124	137
Mudpit_Aged L3 4 Anterior NP IAF	Complement C4-A OS=Homo sapiens GN=C4A PE=1 SV=1	A0A0G2JPR0	C4A	192877	39	55	182	TYNVLDMK	R	N	0.99	51.2	25	16.2	51.2	0	8	0	0	2	983.487	4694.33	70545900	1383	1390
Mudpit_Aged L3 4 Anterior NP IAF	Complement C4-A OS=Homo sapiens GN=C4A PE=1 SV=1	A0A0G2JPR0	C4A	192877	39	55	182	VDFTLSSER	K	D	0.997	53.7	26.9	28.1	41.9	0	3	0	0	2	1053.52	4784.39	258393000	72	80
Mudpit_Aged L3 4 Anterior NP IAF	Complement C4-A OS=Homo sapiens GN=C4A PE=1 SV=1	A0A0G2JPR0	C4A	192877	39	55	182	VEYGFQVK	R	V	0.99	35.9	25.5	16.3	34.9	0	3	0	0	2	969.504	4926.87	81017000	1623	1630
Mudpit_Aged L3 4 Anterior NP IAF	Complement C4-A OS=Homo sapiens GN=C4A PE=1 SV=1	A0A0G2JPR0	C4A	192877	39	55	182	VGDTLNLNLR	R	A	0.997	70	27.9	26.4	61	0	3	0	0	2	1114.62	5742.21	211531000	485	494
Mudpit_Aged L3 4 Anterior NP IAF	Complement C4-A OS=Homo sapiens GN=C4A PE=1 SV=1	A0A0G2JPR0	C4A	192877	39	55	182	VGLSGMAIADVTLLSGFHALR	K	A	0.992	48.3	25.4	16	48.3	0	0	2	0	2	2144.15	9500.11	4827350	1478	1498
Mudpit_Aged L3 4 Anterior NP IAF	Complement C4-A OS=Homo sapiens GN=C4A PE=1 SV=1	A0A0G2JPR0	C4A	192877	39	55	182	VLSLAQEQVGGSPEK	K	L	0.997	117	26.2	20.3	117	0	7	0	0	2	1541.82	4858.67	83788800	1085	1099
Mudpit_Aged L3 4 Anterior NP IAF	Complement C4-A OS=Homo sapiens GN=C4A PE=1 SV=1	A0A0G2JPR0	C4A	192877	39	55	182	VTASDPLDTLGSEGALSPGGVASLLR	R	L	0.997	134	25.3	21.4	134	0	4	4	0	2	2483.3	9284.21	164324000	980	1005
Mudpit_Aged L3 4 Anterior NP IAF	Complement C4-A OS=Homo sapiens GN=C4A PE=1 SV=1	A0A0G2JPR0	C4A	192877	39	55	182	YVLPNFEVK	K	I	0.997	43.9	25	15.7	43.9	0	2	0	0	2	1108.6	7928.67	81211000	236	244
Mudpit_Aged L3 4 Anterior NP IAF	Complement C4-A OS=Homo sapiens GN=C4A PE=1 SV=1	A0A0G2JPR0	C4A	192877	39	55	182	YVSHFETEGPHVLLYFDSVPTSR	R	E	0.983	52.3	25.6	16.3	52.3	0	0	2	0	2	2680.3	10514.1	6896610	1511	1533
Mudpit_Aged L3 4 Anterior NP IAF	Collagen alpha-1(XIV) chain OS=Homo sapiens GN=COL14A1 PE=1 SV=3	Q05707	COL14A1	193516	3	3	3	DTLFTAESGTR	R	R	0.994	44	25	15.8	44	0	1	0	0	2	1197.57	4638.46	4619480	1121	1131
Mudpit_Aged L3 4 Anterior NP IAF	Collagen alpha-1(XIV) chain OS=Homo sapiens GN=COL14A1 PE=1 SV=3	Q05707	COL14A1	193516	3	3	3	NLVVGDETTSSLR	R	V	0.997	44.8	27.3	15.8	44.8	0	1	0	0	2	1390.72	5028.39	5337200	740	752
Mudpit_Aged L3 4 Anterior NP IAF	Collagen alpha-1(XIV) chain OS=Homo sapiens GN=COL14A1 PE=1 SV=3	Q05707	COL14A1	193516	3	3	3	VVIESLQDR	R	Q	0.992	35.5	28.2	15.2	35.5	0	1	0	0	2	1058.58	4071.43	4146300	950	958
Mudpit_Aged L3 4 Anterior NP IAF	Adiponectin OS=Homo sapiens GN=ADIPOQ PE=2 SV=1	A8K660,B2R773,Q15848	ADIPOQ	26414.2	2	2	3	GDIGETGVPGAEGPR	K	G	0.99	34.9	25	15.2	34.9	0	2	0	0	2	1411.68	3989.87	5907790	78	92
Mudpit_Aged L3 4 Anterior NP IAF	Adiponectin OS=Homo sapiens GN=ADIPOQ PE=2 SV=1	A8K660,B2R773,Q15848	ADIPOQ	26414.2	2	2	3	IFYNQQNHYDGSTGK	K	F	0.992	48.1	25	16	48.1	0	0	1	0	2	1771.8	4042.81	6851570	135	149
Mudpit_Aged L3 4 Anterior NP IAF	Epididymis secretory sperm binding protein Li 71p OS=Homo sapiens GN=HEL-S-71p PE=2 SV=1	A0A0K0K1H8	HEL-S-71p	77080.2	22	40	300	ADRDQYELLCLDNTR	K	K	0.997	42.2	25	20.6	37.3	0	1	0	0	2	1882.86	8436.3	4635440	237	251
Mudpit_Aged L3 4 Anterior NP IAF	Epididymis secretory sperm binding protein Li 71p OS=Homo sapiens GN=HEL-S-71p PE=2 SV=1	A0A0K0K1H8	HEL-S-71p	77080.2	22	40	300	AIAANEADAVTLDAGLVYDAYLAPNNLKPVVAEFYGSK	R	E	0.988	57.8	25	16.6	57.8	0	0	5	10	2	3954.02	9729.14	34950700	70	107
Mudpit_Aged L3 4 Anterior NP IAF	Epididymis secretory sperm binding protein Li 71p OS=Homo sapiens GN=HEL-S-71p PE=2 SV=1	A0A0K0K1H8	HEL-S-71p	77080.2	22	40	300	ASYLDCIR	K	A	0.956	26.5	27	14.7	26.5	0	2	0	0	2	998.461	5854.51	9750440	62	69
Mudpit_Aged L3 4 Anterior NP IAF	Epididymis secretory sperm binding protein Li 71p OS=Homo sapiens GN=HEL-S-71p PE=2 SV=1	A0A0K0K1H8	HEL-S-71p	77080.2	22	40	300	CDEWSVNSVGK	K	I	0.987	32.2	25	15	32.2	0	1	0	0	2	1281.54	4577.73	19871500	374	384
Mudpit_Aged L3 4 Anterior NP IAF	Epididymis secretory sperm binding protein Li 71p OS=Homo sapiens GN=HEL-S-71p PE=2 SV=1	A0A0K0K1H8	HEL-S-71p	77080.2	22	40	300	DCHLAQVPSHTVVAR	K	S	0.981	49.5	26.5	16.1	49.5	0	0	2	0	2	1690.83	5232.25	39284200	259	273
Mudpit_Aged L3 4 Anterior NP IAF	Epididymis secretory sperm binding protein Li 71p OS=Homo sapiens GN=HEL-S-71p PE=2 SV=1	A0A0K0K1H8	HEL-S-71p	77080.2	22	40	300	DSGFQMNQLR	K	G	0.997	64.4	25	17	64.4	0	10	0	0	2	1211.55	4100.09	524656000	123	132
Mudpit_Aged L3 4 Anterior NP IAF	Epididymis secretory sperm binding protein Li 71p OS=Homo sapiens GN=HEL-S-71p PE=2 SV=1	A0A0K0K1H8	HEL-S-71p	77080.2	22	40	300	EDLIWELLNQAQEHFGK	K	D	0.997	109	26.7	19.8	109	0	59	44	0	2	2070.03	10054.3	112257000	279	295
Mudpit_Aged L3 4 Anterior NP IAF	Epididymis secretory sperm binding protein Li 71p OS=Homo sapiens GN=HEL-S-71p PE=2 SV=1	A0A0K0K1H8	HEL-S-71p	77080.2	22	40	300	EDPQTFYYAVAVVK	K	K	0.997	77.6	26.3	17.8	77.6	0	19	3	0	2	1629.82	8563.09	1022520000	108	121
Mudpit_Aged L3 4 Anterior NP IAF	Epididymis secretory sperm binding protein Li 71p OS=Homo sapiens GN=HEL-S-71p PE=2 SV=1	A0A0K0K1H8	HEL-S-71p	77080.2	22	40	300	EFQLFSSPHGK	K	D	0.997	70.7	27.2	17.4	70.7	0	7	9	0	2	1276.63	8217.17	714113000	300	310
Mudpit_Aged L3 4 Anterior NP IAF	Epididymis secretory sperm binding protein Li 71p OS=Homo sapiens GN=HEL-S-71p PE=2 SV=1	A0A0K0K1H8	HEL-S-71p	77080.2	22	40	300	EGYYGYTGAFR	K	C	0.997	67.7	25	17.2	67.7	0	9	0	0	2	1283.57	5987.19	984112000	531	541
Mudpit_Aged L3 4 Anterior NP IAF	Epididymis secretory sperm binding protein Li 71p OS=Homo sapiens GN=HEL-S-71p PE=2 SV=1	A0A0K0K1H8	HEL-S-71p	77080.2	22	40	300	FDEFFSEGCAPGSK	R	K	0.997	66.6	25	17.2	66.6	0	3	0	0	2	1578.64	6723.71	20025600	495	508
Mudpit_Aged L3 4 Anterior NP IAF	Epididymis secretory sperm binding protein Li 71p OS=Homo sapiens GN=HEL-S-71p PE=2 SV=1	A0A0K0K1H8	HEL-S-71p	77080.2	22	40	300	HQTVPQNTGGK	K	N	0.994	33.4	25.5	15.1	33.4	0	2	0	0	2	1166.59	2134.53	1826000	554	564
Mudpit_Aged L3 4 Anterior NP IAF	Epididymis secretory sperm binding protein Li 71p OS=Homo sapiens GN=HEL-S-71p PE=2 SV=1	A0A0K0K1H8	HEL-S-71p	77080.2	22	40	300	HSTIFENLANK	K	A	0.997	76.9	26.6	17.8	76.9	0	12	11	0	2	1273.65	6905.58	1057680000	226	236
Mudpit_Aged L3 4 Anterior NP IAF	Epididymis secretory sperm binding protein Li 71p OS=Homo sapiens GN=HEL-S-71p PE=2 SV=1	A0A0K0K1H8	HEL-S-71p	77080.2	22	40	300	IMNGEADAMSLDGGFVYIAGK	K	C	0.997	190	25.4	24.9	190	0	11	1	0	2	2159.01	8820.52	60402400	400	420
Mudpit_Aged L3 4 Anterior NP IAF	Epididymis secretory sperm binding protein Li 71p OS=Homo sapiens GN=HEL-S-71p PE=2 SV=1	A0A0K0K1H8	HEL-S-71p	77080.2	22	40	300	KDSGFQMNQLR	K	G	0.997	59.6	25	16.7	59.6	0	3	4	0	2	1323.65	6279.35	57411000	122	132
Mudpit_Aged L3 4 Anterior NP IAF	Epididymis secretory sperm binding protein Li 71p OS=Homo sapiens GN=HEL-S-71p PE=2 SV=1	A0A0K0K1H8	HEL-S-71p	77080.2	22	40	300	KPVEEYANCHLAR	R	A	0.997	64.5	25.7	17	64.5	0	1	8	6	2	1587.76	5725.81	302031000	588	600
Mudpit_Aged L3 4 Anterior NP IAF	Epididymis secretory sperm binding protein Li 71p OS=Homo sapiens GN=HEL-S-71p PE=2 SV=1	A0A0K0K1H8	HEL-S-71p	77080.2	22	40	300	MYLGYEYVTAIR	K	N	0.997	63.2	27.3	16.9	63.2	0	26	3	0	2	1494.73	8519.93	782024000	332	343
Mudpit_Aged L3 4 Anterior NP IAF	Epididymis secretory sperm binding protein Li 71p OS=Homo sapiens GN=HEL-S-71p PE=2 SV=1	A0A0K0K1H8	HEL-S-71p	77080.2	22	40	300	SASDLTWDNLK	K	G	0.997	80.8	26.7	18.1	80.8	0	9	0	0	2	1249.61	6384.97	1353170000	454	464
Mudpit_Aged L3 4 Anterior NP IAF	Epididymis secretory sperm binding protein Li 71p OS=Homo sapiens GN=HEL-S-71p PE=2 SV=1	A0A0K0K1H8	HEL-S-71p	77080.2	22	40	300	SDNCEDTPEAGYFAVAVVK	K	K	0.997	99.9	25	19.2	99.9	0	4	2	0	2	2072.91	8071.08	47189800	434	452
Mudpit_Aged L3 4 Anterior NP IAF	Epididymis secretory sperm binding protein Li 71p OS=Homo sapiens GN=HEL-S-71p PE=2 SV=1	A0A0K0K1H8	HEL-S-71p	77080.2	22	40	300	SVIPSDGPSVACVK	K	K	0.997	57.3	26.7	20.5	53.4	0	3	0	0	2	1416.7	5482.54	23102600	47	60
Mudpit_Aged L3 4 Anterior NP IAF	Epididymis secretory sperm binding protein Li 71p OS=Homo sapiens GN=HEL-S-71p PE=2 SV=1	A0A0K0K1H8	HEL-S-71p	77080.2	22	40	300	TAGWNIPMGLLYNK	R	I	0.997	56	27.2	16.5	56	0	4	0	0	2	1577.81	9166.82	233619000	476	489
Mudpit_Aged L3 4 Anterior NP IAF	Epididymis secretory sperm binding protein Li 71p OS=Homo sapiens GN=HEL-S-71p PE=2 SV=1	A0A0K0K1H8	HEL-S-71p	77080.2	22	40	300	YLGEEYVK	K	A	0.99	40	25	25.2	30.3	0	6	0	0	2	1000.5	4804.15	1077360000	669	676
Mudpit_Aged L3 4 Anterior NP IAF	Carbohydrate sulfotransferase 3 OS=Homo sapiens GN=CHST3 PE=1 SV=3	Q7LGC8	CHST3	54707.1	3	3	4	LSAELGLR	R	Q	0.987	37.6	30.3	22.1	30.8	0	1	0	0	2	858.504	4657.58	52609400	350	357
Mudpit_Aged L3 4 Anterior NP IAF	Carbohydrate sulfotransferase 3 OS=Homo sapiens GN=CHST3 PE=1 SV=3	Q7LGC8	CHST3	54707.1	3	3	4	QLEFLQPLAEDPR	R	L	0.997	64.2	26.7	17	64.2	0	2	0	0	2	1555.81	8264.09	22627900	279	291
Mudpit_Aged L3 4 Anterior NP IAF	Carbohydrate sulfotransferase 3 OS=Homo sapiens GN=CHST3 PE=1 SV=3	Q7LGC8	CHST3	54707.1	3	3	4	SVSLLEER	R	G	0.99	54.1	26.9	22.4	48	0	1	0	0	2	932.505	4530.99	15442300	466	473
Mudpit_Aged L3 4 Anterior NP IAF	Lysyl oxidase OS=Homo sapiens GN=LOX PE=4 SV=1	D0PNI2,P28300,Q96PQ9	LOX	46944.2	2	2	2	DPGAAVPGAANASAQQPR	R	T	0.997	62.9	33.8	16.9	62.9	0	1	0	0	2	1677.83	3027.08	2485810	71	88
Mudpit_Aged L3 4 Anterior NP IAF	Lysyl oxidase OS=Homo sapiens GN=LOX PE=4 SV=1	D0PNI2,P28300,Q96PQ9	LOX	46944.2	2	2	2	VSVNPSYLVPESDYTNNVVR	K	C	0.997	75.8	26.8	17.7	75.8	0	1	0	0	2	2252.12	7669.36	9411920	378	397
Mudpit_Aged L3 4 Anterior NP IAF	cDNA, FLJ93532, highly similar to Homo sapiens osteomodulin (OMD), mRNA OS=Homo sapiens PE=2 SV=1	B2R7N9,Q99983	OMD	49494.1	3	4	8	IDYGVFAK	K	L	0.99	36.2	25	19.5	32	0	3	0	0	2	912.483	6015.21	43660500	132	139
Mudpit_Aged L3 4 Anterior NP IAF	cDNA, FLJ93532, highly similar to Homo sapiens osteomodulin (OMD), mRNA OS=Homo sapiens PE=2 SV=1	B2R7N9,Q99983	OMD	49494.1	3	4	8	LLLGYNEISK	R	L	0.997	40.1	25.8	25.5	30.1	0	3	0	0	2	1149.65	6741.97	34056700	167	176
Mudpit_Aged L3 4 Anterior NP IAF	cDNA, FLJ93532, highly similar to Homo sapiens osteomodulin (OMD), mRNA OS=Homo sapiens PE=2 SV=1	B2R7N9,Q99983	OMD	49494.1	3	4	8	NLEHLYLQNNEIEK	R	M	0.997	79.4	26.5	18	79.4	0	1	1	0	2	1756.89	7579.58	14067300	301	314
Mudpit_Aged L3 4 Anterior NP IAF	Collagen alpha-1(III) chain OS=Homo sapiens GN=COL3A1 PE=1 SV=4	P02461	COL3A1	138565	4	4	7	INTDEIMTSLK	K	S	0.997	44.3	27.4	15.8	44.3	0	2	0	0	2	1264.65	6649.26	31883500	1229	1239
Mudpit_Aged L3 4 Anterior NP IAF	Collagen alpha-1(III) chain OS=Homo sapiens GN=COL3A1 PE=1 SV=4	P02461	COL3A1	138565	4	4	7	LMGSNEGEFK	K	A	0.994	35.4	25	15.2	35.4	0	1	0	0	2	1111.51	3659.47	7480870	1392	1401
Mudpit_Aged L3 4 Anterior NP IAF	Collagen alpha-1(III) chain OS=Homo sapiens GN=COL3A1 PE=1 SV=4	P02461	COL3A1	138565	4	4	7	NGETGPQGPPGPTGPGGDK	K	G	0.997	89	25	18.6	89	0	2	0	0	2	1719.79	2362.62	5311390	611	629
Mudpit_Aged L3 4 Anterior NP IAF	Collagen alpha-1(III) chain OS=Homo sapiens GN=COL3A1 PE=1 SV=4	P02461	COL3A1	138565	4	4	7	NSIAYMDQASGNVK	K	K	0.997	69.8	25	17.4	69.8	0	2	0	0	2	1513.7	2720.89	2550710	1374	1387
Mudpit_Aged L3 4 Anterior NP IAF	Carboxypeptidase B2 OS=Homo sapiens GN=CPB2 PE=1 SV=1	A0A087WSY5,Q96IY4	CPB2	48424.7	5	6	9	DHEELSLVASEAVR	K	A	0.997	63.8	29.8	17	63.8	0	2	1	0	2	1554.78	7744.98	22532800	329	342
Mudpit_Aged L3 4 Anterior NP IAF	Carboxypeptidase B2 OS=Homo sapiens GN=CPB2 PE=1 SV=1	A0A087WSY5,Q96IY4	CPB2	48424.7	5	6	9	DTGTYGFLLPER	R	Y	0.997	83.4	35.3	18.2	83.4	0	2	0	0	2	1368.68	8087.27	135713000	388	399
Mudpit_Aged L3 4 Anterior NP IAF	Carboxypeptidase B2 OS=Homo sapiens GN=CPB2 PE=1 SV=1	A0A087WSY5,Q96IY4	CPB2	48424.7	5	6	9	IHIGSSFEK	K	Y	0.988	37.1	28.8	24.2	28.2	0	2	0	0	2	1017.54	5864.35	14935500	147	155
Mudpit_Aged L3 4 Anterior NP IAF	Carboxypeptidase B2 OS=Homo sapiens GN=CPB2 PE=1 SV=1	A0A087WSY5,Q96IY4	CPB2	48424.7	5	6	9	SFYANNHCIGTDLNR	R	N	0.997	68.1	25	17.3	68.1	0	1	0	0	2	1782.79	5700.67	3014130	243	257
Mudpit_Aged L3 4 Anterior NP IAF	Carboxypeptidase B2 OS=Homo sapiens GN=CPB2 PE=1 SV=1	A0A087WSY5,Q96IY4	CPB2	48424.7	5	6	9	YSFTIELR	K	D	0.99	43.9	25.5	15.7	43.9	0	1	0	0	2	1028.54	7575.69	6060800	380	387
Mudpit_Aged L3 4 Anterior NP IAF	Melanotransferrin OS=Homo sapiens GN=MFI2 PE=1 SV=2	P08582	MFI2	80213.8	4	4	6	DSSHAFTLDELR	R	G	0.99	45.6	25.8	19	42.4	0	0	1	0	2	1390.66	6810.77	7459820	460	471
Mudpit_Aged L3 4 Anterior NP IAF	Melanotransferrin OS=Homo sapiens GN=MFI2 PE=1 SV=2	P08582	MFI2	80213.8	4	4	6	SEDYELLCPNGAR	R	A	0.994	32	25	15	32	0	2	0	0	2	1524.66	5986.46	17132700	596	608
Mudpit_Aged L3 4 Anterior NP IAF	Melanotransferrin OS=Homo sapiens GN=MFI2 PE=1 SV=2	P08582	MFI2	80213.8	4	4	6	SSHVTIDTLK	R	G	0.997	44.9	27.3	19.3	41.4	0	1	0	0	2	1100.59	4300.22	4837630	116	125
Mudpit_Aged L3 4 Anterior NP IAF	Melanotransferrin OS=Homo sapiens GN=MFI2 PE=1 SV=2	P08582	MFI2	80213.8	4	4	6	TVGWNVPVGYLVESGR	R	L	0.997	58.2	27.4	16.6	58.2	0	2	0	0	2	1732.9	9100.54	20608200	137	152
Mudpit_Aged L3 4 Anterior NP IAF	Fibroblast growth factor-binding protein 2 OS=Homo sapiens GN=FGFBP2 PE=1 SV=1	Q9BYJ0	FGFBP2	24580.7	4	8	10	DSMEELGK	K	A	0.99	35	25	21.5	28.6	0	2	0	0	2	908.403	2285.19	7573950	167	174
Mudpit_Aged L3 4 Anterior NP IAF	Fibroblast growth factor-binding protein 2 OS=Homo sapiens GN=FGFBP2 PE=1 SV=1	Q9BYJ0	FGFBP2	24580.7	4	8	10	EAGPQAHMQQVTSSLK	R	G	0.997	57.4	26.5	16.6	57.4	0	2	3	0	2	1727.84	3665.81	22089700	119	134
Mudpit_Aged L3 4 Anterior NP IAF	Fibroblast growth factor-binding protein 2 OS=Homo sapiens GN=FGFBP2 PE=1 SV=1	Q9BYJ0	FGFBP2	24580.7	4	8	10	NTDQTYWCEYR	R	G	0.982	28.9	25	14.8	28.9	0	1	0	0	2	1536.61	6024.75	8767360	65	75
Mudpit_Aged L3 4 Anterior NP IAF	Fibroblast growth factor-binding protein 2 OS=Homo sapiens GN=FGFBP2 PE=1 SV=1	Q9BYJ0	FGFBP2	24580.7	4	8	10	QGSTGEEFHFQTGGR	K	D	0.997	117	25	20.3	117	0	1	1	0	2	1637.73	4589.53	37396200	26	40
Mudpit_Aged L3 4 Anterior NP IAF	Collagen alpha-1(II) chain OS=Homo sapiens GN=COL2A1 PE=1 SV=3	P02458	COL2A1	141786	15	24	91	AGGAQLGVMQGPMGPMGPR	K	G	0.997	65.9	25.1	17.1	65.9	0	5	0	0	2	1811.87	7199.05	36522900	191	209
Mudpit_Aged L3 4 Anterior NP IAF	Collagen alpha-1(II) chain OS=Homo sapiens GN=COL2A1 PE=1 SV=3	P02458	COL2A1	141786	15	24	91	ALLIQGSNDVEIR	K	A	0.997	81	26.5	20	0	0	4	0	0	2	1427.79	6411.24	43262700	1410	1422
Mudpit_Aged L3 4 Anterior NP IAF	Collagen alpha-1(II) chain OS=Homo sapiens GN=COL2A1 PE=1 SV=3	P02458	COL2A1	141786	15	24	91	DGETGAAGPPGPAGPAGER	K	G	0.997	50.5	25.4	16.2	50.5	0	1	0	0	2	1663.77	2633.53	1292190	635	653
Mudpit_Aged L3 4 Anterior NP IAF	Collagen alpha-1(II) chain OS=Homo sapiens GN=COL2A1 PE=1 SV=3	P02458	COL2A1	141786	15	24	91	GEAGAQGPMGPSGPAGAR	R	G	0.997	109	25.2	19.8	109	0	39	16	0	2	1567.73	2348.97	792348000	1089	1106
Mudpit_Aged L3 4 Anterior NP IAF	Collagen alpha-1(II) chain OS=Homo sapiens GN=COL2A1 PE=1 SV=3	P02458	COL2A1	141786	15	24	91	GEPGDDGPSGAEGPPGPQGLAGQR	K	G	0.997	118	25	20.4	118	0	2	0	0	2	2203	4524.8	9653280	957	980
Mudpit_Aged L3 4 Anterior NP IAF	Collagen alpha-1(II) chain OS=Homo sapiens GN=COL2A1 PE=1 SV=3	P02458	COL2A1	141786	15	24	91	GFPGLPGPSGEPGK	R	Q	0.98	29.5	26.9	14.8	29.5	0	1	0	0	2	1296.66	6518.69	3075850	993	1006
Mudpit_Aged L3 4 Anterior NP IAF	Collagen alpha-1(II) chain OS=Homo sapiens GN=COL2A1 PE=1 SV=3	P02458	COL2A1	141786	15	24	91	GIQGPQGPR	R	G	0.993	36.4	25.8	18.3	33.3	0	1	0	0	2	909.49	2055.29	1511820	1107	1115
Mudpit_Aged L3 4 Anterior NP IAF	Collagen alpha-1(II) chain OS=Homo sapiens GN=COL2A1 PE=1 SV=3	P02458	COL2A1	141786	15	24	91	GPEGAQGPR	R	G	0.997	48	25	24.9	39.1	0	2	0	0	2	868.427	1377.82	589067	384	392
Mudpit_Aged L3 4 Anterior NP IAF	Collagen alpha-1(II) chain OS=Homo sapiens GN=COL2A1 PE=1 SV=3	P02458	COL2A1	141786	15	24	91	GPPGPQGPAGEQGPR	K	G	0.997	81	26.1	18.1	81	0	3	2	0	2	1401.69	2232.15	12191600	120	134
Mudpit_Aged L3 4 Anterior NP IAF	Collagen alpha-1(II) chain OS=Homo sapiens GN=COL2A1 PE=1 SV=3	P02458	COL2A1	141786	15	24	91	GPPGPVGPSGK	R	D	0.997	38.8	27.5	22.7	31.5	0	1	0	0	2	949.51	2064.47	253224	1164	1174
Mudpit_Aged L3 4 Anterior NP IAF	Collagen alpha-1(II) chain OS=Homo sapiens GN=COL2A1 PE=1 SV=3	P02458	COL2A1	141786	15	24	91	GPSGLAGPK	R	G	0.997	53.5	25	16.3	53.5	0	1	0	0	2	783.436	2093.54	652822	534	542
Mudpit_Aged L3 4 Anterior NP IAF	Collagen alpha-1(II) chain OS=Homo sapiens GN=COL2A1 PE=1 SV=3	P02458	COL2A1	141786	15	24	91	NSIAYLDEAAGNLK	K	K	0.997	73.6	26.9	17.6	73.6	0	4	0	0	2	1478.75	7048.48	73405800	1395	1408
Mudpit_Aged L3 4 Anterior NP IAF	Collagen alpha-1(II) chain OS=Homo sapiens GN=COL2A1 PE=1 SV=3	P02458	COL2A1	141786	15	24	91	QGDRGEAGAQGPMGPSGPAGAR	K	G	0.997	74.7	25	18.3	74.1	0	2	3	0	2	2023.94	2597.15	64015200	1085	1106
Mudpit_Aged L3 4 Anterior NP IAF	Collagen alpha-1(II) chain OS=Homo sapiens GN=COL2A1 PE=1 SV=3	P02458	COL2A1	141786	15	24	91	QHDAEVDATLK	R	S	0.997	67.1	25.3	17.2	67.1	0	1	1	0	2	1226.6	4118.09	58303300	1250	1260
Mudpit_Aged L3 4 Anterior NP IAF	Collagen alpha-1(II) chain OS=Homo sapiens GN=COL2A1 PE=1 SV=3	P02458	COL2A1	141786	15	24	91	SLNNQIESIR	K	S	0.997	59.7	27	16.7	59.7	0	2	0	0	2	1173.62	4565.72	43551800	1261	1270
Mudpit_Aged L3 4 Anterior NP IAF	Collagen alpha-1(I) chain OS=Homo sapiens GN=COL1A1 PE=1 SV=5	P02452	COL1A1	138941	11	14	25	ALLLQGSNEIEIR	K	A	0.997	77.8	25.3	20	75.7	0	1	0	0	2	1455.82	7380.45	16404100	1387	1399
Mudpit_Aged L3 4 Anterior NP IAF	Collagen alpha-1(I) chain OS=Homo sapiens GN=COL1A1 PE=1 SV=5	P02452	COL1A1	138941	11	14	25	DGEAGAQGPPGPAGPAGER	K	G	0.997	116	25	20.3	116	0	4	1	0	2	1690.78	2594.34	47149000	613	631
Mudpit_Aged L3 4 Anterior NP IAF	Collagen alpha-1(I) chain OS=Homo sapiens GN=COL1A1 PE=1 SV=5	P02452	COL1A1	138941	11	14	25	GEAGPQGPR	K	G	0.993	33.1	25	30.5	17.7	0	1	0	0	2	868.427	1447.37	256742	353	361
Mudpit_Aged L3 4 Anterior NP IAF	Collagen alpha-1(I) chain OS=Homo sapiens GN=COL1A1 PE=1 SV=5	P02452	COL1A1	138941	11	14	25	GESGPSGPAGPTGAR	K	G	0.997	52	25.1	16.3	52	0	1	0	0	2	1297.61	1817.2	781707	782	796
Mudpit_Aged L3 4 Anterior NP IAF	Collagen alpha-1(I) chain OS=Homo sapiens GN=COL1A1 PE=1 SV=5	P02452	COL1A1	138941	11	14	25	GFPGLPGPSGEPGK	R	Q	0.98	29.5	26.9	14.8	29.5	0	1	0	0	2	1296.66	6518.69	3075850	971	984
Mudpit_Aged L3 4 Anterior NP IAF	Collagen alpha-1(I) chain OS=Homo sapiens GN=COL1A1 PE=1 SV=5	P02452	COL1A1	138941	11	14	25	GFSGLQGPPGPPGSPGEQGPSGASGPAGPR	R	G	0.997	90.8	25.9	18.7	90.8	0	1	2	0	2	2657.27	6343.23	6029710	1112	1141
Mudpit_Aged L3 4 Anterior NP IAF	Collagen alpha-1(I) chain OS=Homo sapiens GN=COL1A1 PE=1 SV=5	P02452	COL1A1	138941	11	14	25	GPAGPQGPR	R	G	0.996	34	25	35.9	13.3	0	1	0	0	2	836.438	1528.52	465613	1085	1093
Mudpit_Aged L3 4 Anterior NP IAF	Collagen alpha-1(I) chain OS=Homo sapiens GN=COL1A1 PE=1 SV=5	P02452	COL1A1	138941	11	14	25	GPPGPMGPPGLAGPPGESGR	R	E	0.997	70.9	26.2	17.4	70.9	0	4	1	0	2	1800.87	5238.14	46638700	995	1014
Mudpit_Aged L3 4 Anterior NP IAF	Collagen alpha-1(I) chain OS=Homo sapiens GN=COL1A1 PE=1 SV=5	P02452	COL1A1	138941	11	14	25	GVPGPPGAVGPAGK	R	D	0.997	68.8	26.8	17.5	68.6	0	4	0	0	2	1160.64	3601.61	28117800	599	612
Mudpit_Aged L3 4 Anterior NP IAF	Collagen alpha-1(I) chain OS=Homo sapiens GN=COL1A1 PE=1 SV=5	P02452	COL1A1	138941	11	14	25	NSVAYMDQQTGNLK	K	K	0.996	37.6	25	15.3	37.6	0	1	0	0	2	1584.73	2678.05	4352710	1372	1385
Mudpit_Aged L3 4 Anterior NP IAF	Collagen alpha-1(I) chain OS=Homo sapiens GN=COL1A1 PE=1 SV=5	P02452	COL1A1	138941	11	14	25	SLSQQIENIR	K	S	0.997	58	27.4	16.6	58	0	1	0	0	2	1187.64	5172.59	18991100	1237	1246
Mudpit_Aged L3 4 Anterior NP IAF	Collagen alpha-1(I) chain OS=Homo sapiens GN=COL1A1 PE=1 SV=5	P02452	COL1A1	138941	11	14	25	STGGISVPGPMGPSGPR	K	G	0.997	44.9	26.1	15.8	44.9	0	2	0	0	2	1553.77	6067.15	11684500	171	187
Mudpit_Aged L3 4 Anterior NP IAF	Dermatopontin OS=Homo sapiens GN=DPT PE=1 SV=2	Q07507	DPT	24004.7	2	2	3	GATTTFSAVER	R	D	0.997	50.8	25	19.4	47.5	0	2	0	0	2	1139.57	3610.6	16675200	170	180
Mudpit_Aged L3 4 Anterior NP IAF	Dermatopontin OS=Homo sapiens GN=DPT PE=1 SV=2	Q07507	DPT	24004.7	2	2	3	YFESVLDR	R	E	0.988	30.2	25	29.2	15.9	0	1	0	0	2	1028.5	5609.76	16084500	119	126
Mudpit_Aged L3 4 Anterior NP IAF	Enolase 1, (Alpha), isoform CRA_a OS=Homo sapiens GN=ENO1 PE=2 SV=1	A0A024R4F1,P06733	ENO1	47170.2	11	13	34	AAVPSGASTGIYEALELR	R	D	0.997	95	27.3	18.9	95	0	5	3	0	2	1804.94	8469.81	130310000	33	50
Mudpit_Aged L3 4 Anterior NP IAF	Enolase 1, (Alpha), isoform CRA_a OS=Homo sapiens GN=ENO1 PE=2 SV=1	A0A024R4F1,P06733	ENO1	47170.2	11	13	34	DATNVGDEGGFAPNILENK	K	E	0.997	117	25	20.3	117	0	3	0	0	2	1960.92	7472.86	27717700	203	221
Mudpit_Aged L3 4 Anterior NP IAF	Enolase 1, (Alpha), isoform CRA_a OS=Homo sapiens GN=ENO1 PE=2 SV=1	A0A024R4F1,P06733	ENO1	47170.2	11	13	34	DYPVVSIEDPFDQDDWGAWQK	K	F	0.997	104	25	19.5	104	0	1	1	0	2	2510.11	9287.37	37266500	286	306
Mudpit_Aged L3 4 Anterior NP IAF	Enolase 1, (Alpha), isoform CRA_a OS=Homo sapiens GN=ENO1 PE=2 SV=1	A0A024R4F1,P06733	ENO1	47170.2	11	13	34	FTASAGIQVVGDDLTVTNPK	K	R	0.997	82.5	26.6	18.2	82.5	0	1	0	0	2	2033.06	8410.2	2262640	307	326
Mudpit_Aged L3 4 Anterior NP IAF	Enolase 1, (Alpha), isoform CRA_a OS=Homo sapiens GN=ENO1 PE=2 SV=1	A0A024R4F1,P06733	ENO1	47170.2	11	13	34	GNPTVEVDLFTSK	R	G	0.997	72	26	70.4	19.1	0	5	0	0	2	1406.72	7077.67	73405900	16	28
Mudpit_Aged L3 4 Anterior NP IAF	Enolase 1, (Alpha), isoform CRA_a OS=Homo sapiens GN=ENO1 PE=2 SV=1	A0A024R4F1,P06733	ENO1	47170.2	11	13	34	IGAEVYHNLK	R	N	0.997	44.5	28.4	15.8	44.5	0	2	0	0	2	1143.62	5493.69	13868600	184	193
Mudpit_Aged L3 4 Anterior NP IAF	Enolase 1, (Alpha), isoform CRA_a OS=Homo sapiens GN=ENO1 PE=2 SV=1	A0A024R4F1,P06733	ENO1	47170.2	11	13	34	LAMQEFMILPVGAANFR	K	E	0.987	33.2	26.9	15.1	33.2	0	1	0	0	2	1907.99	9327	13930300	163	179
Mudpit_Aged L3 4 Anterior NP IAF	Enolase 1, (Alpha), isoform CRA_a OS=Homo sapiens GN=ENO1 PE=2 SV=1	A0A024R4F1,P06733	ENO1	47170.2	11	13	34	LMIEMDGTENK	K	S	0.986	33.2	25	15.1	33.2	0	1	0	0	2	1296.58	3154.08	875916	93	103
Mudpit_Aged L3 4 Anterior NP IAF	Enolase 1, (Alpha), isoform CRA_a OS=Homo sapiens GN=ENO1 PE=2 SV=1	A0A024R4F1,P06733	ENO1	47170.2	11	13	34	TIAPALVSK	K	K	0.993	34.9	25.8	15.3	34.8	0	3	0	0	2	899.556	4018.39	23827300	72	80
Mudpit_Aged L3 4 Anterior NP IAF	Enolase 1, (Alpha), isoform CRA_a OS=Homo sapiens GN=ENO1 PE=2 SV=1	A0A024R4F1,P06733	ENO1	47170.2	11	13	34	VVIGMDVAASEFFR	K	S	0.997	63	26.2	16.9	63	0	4	0	0	2	1556.78	8911.82	46166400	240	253
Mudpit_Aged L3 4 Anterior NP IAF	Enolase 1, (Alpha), isoform CRA_a OS=Homo sapiens GN=ENO1 PE=2 SV=1	A0A024R4F1,P06733	ENO1	47170.2	11	13	34	YISPDQLADLYK	R	S	0.997	61.2	25	16.8	61.2	0	4	0	0	2	1425.73	8076.86	34712300	270	281
Mudpit_Aged L3 4 Anterior NP IAF	Monocyte differentiation antigen CD14 OS=Homo sapiens PE=2 SV=1	B2R888,F1C4A7,P08571	CD14	40076.6	4	4	6	AFPALTSLDLSDNPGLGER	R	G	0.997	80	27.3	18	80	0	2	0	0	2	1973	9112.81	13796600	192	210
Mudpit_Aged L3 4 Anterior NP IAF	Monocyte differentiation antigen CD14 OS=Homo sapiens PE=2 SV=1	B2R888,F1C4A7,P08571	CD14	40076.6	4	4	6	ELTLEDLK	K	I	0.99	42.8	26.7	23.9	34.6	0	1	0	0	2	960.525	6329.86	6466460	120	127
Mudpit_Aged L3 4 Anterior NP IAF	Monocyte differentiation antigen CD14 OS=Homo sapiens PE=2 SV=1	B2R888,F1C4A7,P08571	CD14	40076.6	4	4	6	FPAIQNLALR	K	N	0.989	33.2	26.3	15.1	33.2	0	2	0	0	2	1142.67	7678.84	25215700	221	230
Mudpit_Aged L3 4 Anterior NP IAF	Monocyte differentiation antigen CD14 OS=Homo sapiens PE=2 SV=1	B2R888,F1C4A7,P08571	CD14	40076.6	4	4	6	ITGTMPPLPLEATGLALSSLR	K	L	0.992	50.6	25	16.2	50.6	0	0	1	0	2	2138.19	9406.08	15388700	128	148
Mudpit_Aged L3 4 Anterior NP IAF	Apolipoprotein A-IV OS=Homo sapiens GN=APOA4 PE=1 SV=3	P06727	APOA4	45399.4	24	40	121	ALVQQMEQLR	K	Q	0.997	56.2	27.4	16.5	56.2	0	11	0	0	2	1215.65	3746.4	173734000	317	326
Mudpit_Aged L3 4 Anterior NP IAF	Apolipoprotein A-IV OS=Homo sapiens GN=APOA4 PE=1 SV=3	P06727	APOA4	45399.4	24	40	121	EEIGKELEELR	K	A	0.997	44	26.6	15.8	44	0	1	1	0	2	1344.7	8935.96	22045100	100	110
Mudpit_Aged L3 4 Anterior NP IAF	Apolipoprotein A-IV OS=Homo sapiens GN=APOA4 PE=1 SV=3	P06727	APOA4	45399.4	24	40	121	ENADSLQASLRPHADELK	R	A	0.997	71.8	26.5	17.5	71.8	0	3	2	0	2	1993.99	7636.06	49200400	170	187
Mudpit_Aged L3 4 Anterior NP IAF	Apolipoprotein A-IV OS=Homo sapiens GN=APOA4 PE=1 SV=3	P06727	APOA4	45399.4	24	40	121	GNTEGLQK	R	S	0.99	39.5	26.9	23.3	31.7	0	1	0	0	2	846.432	1520.73	229597	280	287
Mudpit_Aged L3 4 Anterior NP IAF	Apolipoprotein A-IV OS=Homo sapiens GN=APOA4 PE=1 SV=3	P06727	APOA4	45399.4	24	40	121	IDQNVEELK	K	G	0.997	72.3	27.4	27.8	62	0	5	0	0	2	1087.56	3684.41	57195700	190	198
Mudpit_Aged L3 4 Anterior NP IAF	Apolipoprotein A-IV OS=Homo sapiens GN=APOA4 PE=1 SV=3	P06727	APOA4	45399.4	24	40	121	IDQTVEELR	K	R	0.997	65.6	26.8	20	62.6	0	5	0	0	2	1102.57	3814.07	73403100	212	220
Mudpit_Aged L3 4 Anterior NP IAF	Apolipoprotein A-IV OS=Homo sapiens GN=APOA4 PE=1 SV=3	P06727	APOA4	45399.4	24	40	121	IDQTVEELRR	K	S	0.969	35.7	26.7	15.2	35.7	0	1	3	0	2	1258.68	4326.67	150886000	212	221
Mudpit_Aged L3 4 Anterior NP IAF	Apolipoprotein A-IV OS=Homo sapiens GN=APOA4 PE=1 SV=3	P06727	APOA4	45399.4	24	40	121	ISASAEELR	R	Q	0.997	64.9	28.4	32.6	49.4	0	7	0	0	2	975.51	3023.63	174470000	256	264
Mudpit_Aged L3 4 Anterior NP IAF	Apolipoprotein A-IV OS=Homo sapiens GN=APOA4 PE=1 SV=3	P06727	APOA4	45399.4	24	40	121	LAPLAEDVR	R	G	0.997	47.6	25	20.2	43.4	0	5	0	0	2	983.552	4528.03	130316000	267	275
Mudpit_Aged L3 4 Anterior NP IAF	Apolipoprotein A-IV OS=Homo sapiens GN=APOA4 PE=1 SV=3	P06727	APOA4	45399.4	24	40	121	LEPYADQLR	R	T	0.996	37.9	28.4	24.3	29	0	3	0	0	2	1104.57	4592.11	34768300	135	143
Mudpit_Aged L3 4 Anterior NP IAF	Apolipoprotein A-IV OS=Homo sapiens GN=APOA4 PE=1 SV=3	P06727	APOA4	45399.4	24	40	121	LGEVNTYAGDLQK	K	K	0.997	91.1	26.1	18.7	91.1	0	7	0	0	2	1407.71	4744.88	116916000	66	78
Mudpit_Aged L3 4 Anterior NP IAF	Apolipoprotein A-IV OS=Homo sapiens GN=APOA4 PE=1 SV=3	P06727	APOA4	45399.4	24	40	121	LGPHAGDVEGHLSFLEK	K	D	0.997	77.8	27.3	17.9	77.8	0	1	1	1	2	1805.92	8892.11	56735300	329	345
Mudpit_Aged L3 4 Anterior NP IAF	Apolipoprotein A-IV OS=Homo sapiens GN=APOA4 PE=1 SV=3	P06727	APOA4	45399.4	24	40	121	LKEEIGKELEELR	K	A	0.997	59.6	25.7	22.5	53.9	0	2	5	0	2	1585.88	9486.46	38582300	98	110
Mudpit_Aged L3 4 Anterior NP IAF	Apolipoprotein A-IV OS=Homo sapiens GN=APOA4 PE=1 SV=3	P06727	APOA4	45399.4	24	40	121	LLPHANEVSQK	R	I	0.997	39.8	27.4	15.5	39.8	0	1	4	0	2	1235.67	3887.38	100336000	113	123
Mudpit_Aged L3 4 Anterior NP IAF	Apolipoprotein A-IV OS=Homo sapiens GN=APOA4 PE=1 SV=3	P06727	APOA4	45399.4	24	40	121	LNHQLEGLTFQMK	K	K	0.997	54.3	27.4	16.4	54.3	0	6	4	0	2	1574.8	8090.15	67750100	234	246
Mudpit_Aged L3 4 Anterior NP IAF	Apolipoprotein A-IV OS=Homo sapiens GN=APOA4 PE=1 SV=3	P06727	APOA4	45399.4	24	40	121	LTPYADEFK	R	V	0.997	40.1	25	15.5	40.1	0	5	0	0	2	1083.54	5063.61	64448900	201	209
Mudpit_Aged L3 4 Anterior NP IAF	Apolipoprotein A-IV OS=Homo sapiens GN=APOA4 PE=1 SV=3	P06727	APOA4	45399.4	24	40	121	LVPFATELHER	K	L	0.997	49.3	26.2	16.1	49.3	0	2	4	0	2	1311.71	8031.9	171533000	80	90
Mudpit_Aged L3 4 Anterior NP IAF	Apolipoprotein A-IV OS=Homo sapiens GN=APOA4 PE=1 SV=3	P06727	APOA4	45399.4	24	40	121	RVEPYGENFNK	R	A	0.997	46.1	27.3	15.9	46.1	0	2	1	0	2	1352.66	4316.17	59964500	306	316
Mudpit_Aged L3 4 Anterior NP IAF	Apolipoprotein A-IV OS=Homo sapiens GN=APOA4 PE=1 SV=3	P06727	APOA4	45399.4	24	40	121	SELTQQLNALFQDK	K	L	0.997	95.7	26.9	19	95.7	0	3	2	0	2	1634.84	9216.86	81922400	52	65
Mudpit_Aged L3 4 Anterior NP IAF	Apolipoprotein A-IV OS=Homo sapiens GN=APOA4 PE=1 SV=3	P06727	APOA4	45399.4	24	40	121	SLAELGGHLDQQVEEFR	K	R	0.997	131	25.9	21.2	131	0	3	4	0	2	1927.95	8401.71	149241000	288	304
Mudpit_Aged L3 4 Anterior NP IAF	Apolipoprotein A-IV OS=Homo sapiens GN=APOA4 PE=1 SV=3	P06727	APOA4	45399.4	24	40	121	SLAPYAQDTQEK	R	L	0.997	58	28.1	17.2	57.5	0	8	0	0	2	1350.65	2987.23	53600600	222	233
Mudpit_Aged L3 4 Anterior NP IAF	Apolipoprotein A-IV OS=Homo sapiens GN=APOA4 PE=1 SV=3	P06727	APOA4	45399.4	24	40	121	TQVNTQAEQLR	R	R	0.997	69.1	27	17.3	69.1	0	2	1	0	2	1287.67	2361.16	20675000	144	154
Mudpit_Aged L3 4 Anterior NP IAF	Apolipoprotein A-IV OS=Homo sapiens GN=APOA4 PE=1 SV=3	P06727	APOA4	45399.4	24	40	121	VEPYGENFNK	R	A	0.997	47.2	28.9	16.9	46.2	0	2	0	0	2	1196.56	3611.53	33280900	307	316
Mudpit_Aged L3 4 Anterior NP IAF	Apolipoprotein A-IV OS=Homo sapiens GN=APOA4 PE=1 SV=3	P06727	APOA4	45399.4	24	40	121	VNSFFSTFK	K	E	0.997	50.4	27.1	16.2	50.4	0	2	0	0	2	1076.54	7278.51	27254500	351	359
Mudpit_Aged L3 4 Anterior NP IAF	Platelet-derived growth factor receptor-like protein OS=Homo sapiens GN=PDGFRL PE=1 SV=1	Q15198	PDGFRL	41860.9	4	5	10	DERPVTIQDTWR	K	L	0.997	42.3	27	15.6	42.3	0	1	4	0	2	1515.76	5660.99	120628000	314	325
Mudpit_Aged L3 4 Anterior NP IAF	Platelet-derived growth factor receptor-like protein OS=Homo sapiens GN=PDGFRL PE=1 SV=1	Q15198	PDGFRL	41860.9	4	5	10	GELFVPSPSYFDVVYLNPDR	K	Q	0.997	83.8	26.5	18.2	83.8	0	1	0	0	2	2314.14	9403.79	19317900	171	190
Mudpit_Aged L3 4 Anterior NP IAF	Platelet-derived growth factor receptor-like protein OS=Homo sapiens GN=PDGFRL PE=1 SV=1	Q15198	PDGFRL	41860.9	4	5	10	IGWSYPAYLDTFK	R	D	0.997	42.8	26.4	15.7	42.8	0	1	0	0	2	1560.77	9076.11	14005000	101	113
Mudpit_Aged L3 4 Anterior NP IAF	Platelet-derived growth factor receptor-like protein OS=Homo sapiens GN=PDGFRL PE=1 SV=1	Q15198	PDGFRL	41860.9	4	5	10	TGSTYIFFTEK	K	G	0.997	69.1	26.1	17.3	69.1	0	3	0	0	2	1293.64	6790.53	68454400	160	170
Mudpit_Aged L3 4 Anterior NP IAF	Ig mu chain C region OS=Homo sapiens GN=IGHM PE=1 SV=3	P01871	IGHM	49305.7	18	27	197	DGFFGNPR	R	K	0.99	46.4	25	15.9	46.4	0	8	0	0	2	909.421	4851.39	209663000	121	128
Mudpit_Aged L3 4 Anterior NP IAF	Ig mu chain C region OS=Homo sapiens GN=IGHM PE=1 SV=3	P01871	IGHM	49305.7	18	27	197	DVMQGTDEHVVCK	K	V	0.994	36	25	15.3	36	0	1	1	0	2	1518.66	4626.52	12571800	77	89
Mudpit_Aged L3 4 Anterior NP IAF	Ig mu chain C region OS=Homo sapiens GN=IGHM PE=1 SV=3	P01871	IGHM	49305.7	18	27	197	EGKQVGSGVTTDQVQAEAK	R	E	0.995	54.5	26.9	16.4	54.5	0	0	1	0	2	1931.97	3522.41	3232940	151	169
Mudpit_Aged L3 4 Anterior NP IAF	Ig mu chain C region OS=Homo sapiens GN=IGHM PE=1 SV=3	P01871	IGHM	49305.7	18	27	197	ESGPTTYK	K	V	0.99	62.6	25	29.1	50.4	0	2	0	0	2	882.42	1659.76	1034260	170	177
Mudpit_Aged L3 4 Anterior NP IAF	Ig mu chain C region OS=Homo sapiens GN=IGHM PE=1 SV=3	P01871	IGHM	49305.7	18	27	197	FTCTVTHTDLPSPLK	R	Q	0.956	32.5	27.4	15	32.5	0	1	0	0	2	1717.85	8095.25	2713190	301	315
Mudpit_Aged L3 4 Anterior NP IAF	Ig mu chain C region OS=Homo sapiens GN=IGHM PE=1 SV=3	P01871	IGHM	49305.7	18	27	197	GQPLSPEK	R	Y	0.99	33	25	15.1	33	0	1	0	0	2	855.457	1899.07	5033040	369	376
Mudpit_Aged L3 4 Anterior NP IAF	Ig mu chain C region OS=Homo sapiens GN=IGHM PE=1 SV=3	P01871	IGHM	49305.7	18	27	197	GVALHRPDVYLLPPAR	K	E	0.997	53.3	25	16.3	53.3	0	2	21	6	2	1774.01	10010.6	217357000	323	338
Mudpit_Aged L3 4 Anterior NP IAF	Ig mu chain C region OS=Homo sapiens GN=IGHM PE=1 SV=3	P01871	IGHM	49305.7	18	27	197	LICQATGFSPR	K	Q	0.997	45.4	26.3	15.8	45.4	0	1	0	0	2	1250.62	5843.58	4687290	132	142
Mudpit_Aged L3 4 Anterior NP IAF	Ig mu chain C region OS=Homo sapiens GN=IGHM PE=1 SV=3	P01871	IGHM	49305.7	18	27	197	NVPLPVIAELPPK	K	V	0.997	59.9	25	16.7	59.9	0	16	4	0	2	1386.84	8888.38	2055040000	100	112
Mudpit_Aged L3 4 Anterior NP IAF	Ig mu chain C region OS=Homo sapiens GN=IGHM PE=1 SV=3	P01871	IGHM	49305.7	18	27	197	QIQVSWLR	R	E	0.99	41.3	28.2	23.5	33.4	0	4	0	0	2	1029.58	6938.56	217898000	143	150
Mudpit_Aged L3 4 Anterior NP IAF	Ig mu chain C region OS=Homo sapiens GN=IGHM PE=1 SV=3	P01871	IGHM	49305.7	18	27	197	QVGSGVTTDQVQAEAK	K	E	0.997	129	26.3	21.1	129	0	33	2	0	2	1617.81	2993.65	1661720000	154	169
Mudpit_Aged L3 4 Anterior NP IAF	Ig mu chain C region OS=Homo sapiens GN=IGHM PE=1 SV=3	P01871	IGHM	49305.7	18	27	197	STGKPTLYNVSLVMSDTAGTCY	K	-	0.959	44.9	31.1	15.8	44.9	0	1	0	0	2	2382.08	8563.65	1647880	431	452
Mudpit_Aged L3 4 Anterior NP IAF	Ig mu chain C region OS=Homo sapiens GN=IGHM PE=1 SV=3	P01871	IGHM	49305.7	18	27	197	VFAIPPSFASIFLTK	R	S	0.997	63.5	25	17	63.5	0	1	1	0	2	1637.93	9454.88	20546900	224	238
Mudpit_Aged L3 4 Anterior NP IAF	Ig mu chain C region OS=Homo sapiens GN=IGHM PE=1 SV=3	P01871	IGHM	49305.7	18	27	197	VSVFVPPR	K	D	0.99	44.1	27.8	15.8	44.1	0	11	0	0	2	900.53	5236.04	812703000	113	120
Mudpit_Aged L3 4 Anterior NP IAF	Ig mu chain C region OS=Homo sapiens GN=IGHM PE=1 SV=3	P01871	IGHM	49305.7	18	27	197	VTSTLTIK	K	E	0.99	43	25	15.7	43	0	11	0	0	2	862.524	3454.95	191735000	178	185
Mudpit_Aged L3 4 Anterior NP IAF	Ig mu chain C region OS=Homo sapiens GN=IGHM PE=1 SV=3	P01871	IGHM	49305.7	18	27	197	YAATSQVLLPSK	K	D	0.997	95.6	25.5	19	95.6	0	13	0	0	2	1277.71	5172.66	313668000	65	76
Mudpit_Aged L3 4 Anterior NP IAF	Ig mu chain C region OS=Homo sapiens GN=IGHM PE=1 SV=3	P01871	IGHM	49305.7	18	27	197	YFAHSILTVSEEEWNTGETYTCVVAHEALPNR	?	?	0.977	58.2	25	16.6	58.2	0	0	0	3	2	3724.72	9849.69	6518090	0	0
Mudpit_Aged L3 4 Anterior NP IAF	Ig mu chain C region OS=Homo sapiens GN=IGHM PE=1 SV=3	P01871	IGHM	49305.7	18	27	197	YVTSAPMPEPQAPGR	K	Y	0.997	98	25.2	19.1	98	0	45	7	0	2	1600.78	4026.73	2034460000	377	391
Mudpit_Aged L3 4 Anterior NP IAF	Immunoglobulin alpha-2 heavy chain OS=Homo sapiens PE=1 SV=1	IGA2_HUMAN		0	4	5	16	DASGATFTWTPSSGK	?	?	0.997	89.2	25.8	18.6	89.2	0	5	0	0	2	1512.7	6070.93	48122600	0	0
Mudpit_Aged L3 4 Anterior NP IAF	Immunoglobulin alpha-2 heavy chain OS=Homo sapiens PE=1 SV=1	IGA2_HUMAN		0	4	5	16	DTVYLQMBSLR	?	?	0.992	34.4	26.4	15.1	34.4	0	2	0	0	2	1339.67	7544.24	7803820	0	0
Mudpit_Aged L3 4 Anterior NP IAF	Immunoglobulin alpha-2 heavy chain OS=Homo sapiens PE=1 SV=1	IGA2_HUMAN		0	4	5	16	EVQLVETGGGLIQPGGSLR	?	?	0.997	83.3	30.1	47.4	54.1	0	4	1	0	2	1910.03	7711.78	66852900	0	0
Mudpit_Aged L3 4 Anterior NP IAF	Immunoglobulin alpha-2 heavy chain OS=Homo sapiens PE=1 SV=1	IGA2_HUMAN		0	4	5	16	GTTVTVSSASPTSPK	?	?	0.997	70.9	27.2	17.4	70.9	0	4	0	0	2	1419.73	2637.79	11863300	0	0
Mudpit_Aged L3 4 Anterior NP IAF	Immunoglobulin alpha-2 heavy chain OS=Homo sapiens PE=1 SV=1	IGA2_HUMAN		0	4	5	16	WLQGSQELPR	R	E	0.997	56.7	26.4	16.5	56.7	0	5	0	0	2	1213.63	5846.97	494697000	0	0
Mudpit_Aged L3 4 Anterior NP IAF	Sex hormone-binding globulin OS=Homo sapiens GN=SHBG PE=1 SV=1	I3L145,P04278	SHBG	43780.6	6	6	11	DDWFMLGLR	K	D	0.996	38.6	25.2	15.4	38.6	0	1	0	0	2	1152.55	9322.43	18616400	93	101
Mudpit_Aged L3 4 Anterior NP IAF	Sex hormone-binding globulin OS=Homo sapiens GN=SHBG PE=1 SV=1	I3L145,P04278	SHBG	43780.6	6	6	11	IALGGLLFPASNLR	R	L	0.997	56.7	25	16.5	56.7	0	1	0	0	2	1441.85	9206.47	20708000	170	183
Mudpit_Aged L3 4 Anterior NP IAF	Sex hormone-binding globulin OS=Homo sapiens GN=SHBG PE=1 SV=1	I3L145,P04278	SHBG	43780.6	6	6	11	MEGDSVLLEVDGEEVLR	K	L	0.997	83.5	26.5	18.2	83.5	0	2	0	0	2	1889.92	8900.17	7447450	136	152
Mudpit_Aged L3 4 Anterior NP IAF	Sex hormone-binding globulin OS=Homo sapiens GN=SHBG PE=1 SV=1	I3L145,P04278	SHBG	43780.6	6	6	11	QAEISASAPTSLR	K	S	0.997	43.5	27.5	15.7	43.5	0	1	0	0	2	1330.7	4111.6	39223500	203	215
Mudpit_Aged L3 4 Anterior NP IAF	Sex hormone-binding globulin OS=Homo sapiens GN=SHBG PE=1 SV=1	I3L145,P04278	SHBG	43780.6	6	6	11	SCDVESNPGIFLPPGTQAEFNLR	R	D	0.997	64.1	25.3	17	64.1	0	1	0	0	2	2549.2	9178.86	8597430	216	238
Mudpit_Aged L3 4 Anterior NP IAF	Sex hormone-binding globulin OS=Homo sapiens GN=SHBG PE=1 SV=1	I3L145,P04278	SHBG	43780.6	6	6	11	TWDPEGVIFYGDTNPK	R	D	0.997	83.1	25.8	18.2	83.1	0	5	0	0	2	1838.86	8488.9	29250100	77	92
Mudpit_Aged L3 4 Anterior NP IAF	von Willebrand factor OS=Homo sapiens GN=VWF PE=1 SV=4	P04275	VWF	309251	12	14	19	AFVVDMMER	K	L	0.996	35.2	25	15.2	0	0	1	0	0	2	1113.51	5172.45	5959280	1298	1306
Mudpit_Aged L3 4 Anterior NP IAF	von Willebrand factor OS=Homo sapiens GN=VWF PE=1 SV=4	P04275	VWF	309251	12	14	19	DETHFEVVESGR	K	Y	0.997	51.6	25	16.2	51.6	0	2	1	0	2	1404.64	5338.03	17875300	949	960
Mudpit_Aged L3 4 Anterior NP IAF	von Willebrand factor OS=Homo sapiens GN=VWF PE=1 SV=4	P04275	VWF	309251	12	14	19	DGTVTTDWK	R	T	0.997	39.5	25.4	15.5	39.5	0	1	0	0	2	1022.48	3345.86	15791400	2100	2108
Mudpit_Aged L3 4 Anterior NP IAF	von Willebrand factor OS=Homo sapiens GN=VWF PE=1 SV=4	P04275	VWF	309251	12	14	19	EFMEEVIQR	K	M	0.997	40.6	25	15.5	40.6	0	1	0	0	2	1180.57	6284.54	10114200	1519	1527
Mudpit_Aged L3 4 Anterior NP IAF	von Willebrand factor OS=Homo sapiens GN=VWF PE=1 SV=4	P04275	VWF	309251	12	14	19	EGGPSQIGDALGFAVR	R	Y	0.997	114	27.4	20.1	114	0	2	0	0	2	1573.8	8713.34	16894800	1764	1779
Mudpit_Aged L3 4 Anterior NP IAF	von Willebrand factor OS=Homo sapiens GN=VWF PE=1 SV=4	P04275	VWF	309251	12	14	19	EQDLEVILHNGACSPGAR	K	Q	0.997	35.8	25.5	15.2	35.8	0	1	0	0	2	1966.93	7058.76	1395640	1981	1998
Mudpit_Aged L3 4 Anterior NP IAF	von Willebrand factor OS=Homo sapiens GN=VWF PE=1 SV=4	P04275	VWF	309251	12	14	19	ILAGPAGDSNVVK	R	L	0.997	46.7	25	15.9	46.7	0	3	0	0	2	1240.69	4034.25	13098000	1838	1850
Mudpit_Aged L3 4 Anterior NP IAF	von Willebrand factor OS=Homo sapiens GN=VWF PE=1 SV=4	P04275	VWF	309251	12	14	19	ITLLLMASQEPQR	R	M	0.997	97.7	26.2	24.3	92.6	0	1	0	0	2	1499.83	7830.55	7247040	1380	1392
Mudpit_Aged L3 4 Anterior NP IAF	von Willebrand factor OS=Homo sapiens GN=VWF PE=1 SV=4	P04275	VWF	309251	12	14	19	LSEAEFEVLK	R	A	0.997	58.9	26.6	16.7	58.9	0	1	0	0	2	1164.61	7155.67	9088240	1288	1297
Mudpit_Aged L3 4 Anterior NP IAF	von Willebrand factor OS=Homo sapiens GN=VWF PE=1 SV=4	P04275	VWF	309251	12	14	19	VIVIPVGIGPHANLK	K	Q	0.966	35.3	25	15.2	35.3	0	0	1	0	2	1526.94	8480.55	9392080	1409	1423
Mudpit_Aged L3 4 Anterior NP IAF	von Willebrand factor OS=Homo sapiens GN=VWF PE=1 SV=4	P04275	VWF	309251	12	14	19	VTVFPIGIGDR	R	Y	0.997	38.8	26.8	15.4	38.8	0	2	0	0	2	1173.66	8077.14	18976200	1820	1830
Mudpit_Aged L3 4 Anterior NP IAF	von Willebrand factor OS=Homo sapiens GN=VWF PE=1 SV=4	P04275	VWF	309251	12	14	19	YLSDHSFLVSQGDR	R	E	0.997	90.3	25.6	18.6	90.3	0	1	1	0	2	1623.78	6055.76	47312500	1584	1597
Mudpit_Aged L3 4 Anterior NP IAF	Plasma kallikrein (Fragment) OS=Homo sapiens GN=KLKB1 PE=1 SV=1	H0YAC1,P03952	KLKB1	71369.7	6	7	13	DSVTGTLPK	K	V	0.997	51.4	27.9	16.2	51.4	0	2	0	0	2	917.494	3072.72	11063600	81	89
Mudpit_Aged L3 4 Anterior NP IAF	Plasma kallikrein (Fragment) OS=Homo sapiens GN=KLKB1 PE=1 SV=1	H0YAC1,P03952	KLKB1	71369.7	6	7	13	EIIIHQNYK	K	V	0.985	30.7	26.3	14.9	30.7	0	1	0	0	2	1157.63	4264.54	5508140	468	476
Mudpit_Aged L3 4 Anterior NP IAF	Plasma kallikrein (Fragment) OS=Homo sapiens GN=KLKB1 PE=1 SV=1	H0YAC1,P03952	KLKB1	71369.7	6	7	13	IAYGTQGSSGYSLR	R	L	0.997	99	26.4	19.2	99	0	2	0	0	2	1459.72	4439.84	10669800	360	373
Mudpit_Aged L3 4 Anterior NP IAF	Plasma kallikrein (Fragment) OS=Homo sapiens GN=KLKB1 PE=1 SV=1	H0YAC1,P03952	KLKB1	71369.7	6	7	13	IYSGILNLSDITK	R	D	0.997	83.7	25.3	18.2	83.7	0	2	0	0	2	1436.8	9063.69	39463900	447	459
Mudpit_Aged L3 4 Anterior NP IAF	Plasma kallikrein (Fragment) OS=Homo sapiens GN=KLKB1 PE=1 SV=1	H0YAC1,P03952	KLKB1	71369.7	6	7	13	VAEYMDWILEK	K	T	0.997	59.5	26.9	16.7	59.5	0	2	0	0	2	1396.68	8731.6	26946400	614	624
Mudpit_Aged L3 4 Anterior NP IAF	Plasma kallikrein (Fragment) OS=Homo sapiens GN=KLKB1 PE=1 SV=1	H0YAC1,P03952	KLKB1	71369.7	6	7	13	YSPGGTPTAIK	K	V	0.997	52.5	28.1	16.3	52.5	0	4	0	0	2	1091.57	3041.31	77567600	170	180
Mudpit_Aged L3 4 Anterior NP IAF	Keratin 1 OS=Homo sapiens GN=KRT1 PE=3 SV=1	H6VRF8,H6VRG0,H6VRG1,P04264	KRT1	66040.3	12	13	17	AQYEDIAQK	K	S	0.997	45.4	26.9	15.8	45.4	0	1	0	0	2	1065.52	2587.86	2673890	356	364
Mudpit_Aged L3 4 Anterior NP IAF	Keratin 1 OS=Homo sapiens GN=KRT1 PE=3 SV=1	H6VRF8,H6VRG0,H6VRG1,P04264	KRT1	66040.3	12	13	17	FLEQQNQVLQTK	R	W	0.997	80.8	32.2	18.1	80.8	0	1	0	0	2	1475.79	4557.13	7888010	200	211
Mudpit_Aged L3 4 Anterior NP IAF	Keratin 1 OS=Homo sapiens GN=KRT1 PE=3 SV=1	H6VRF8,H6VRG0,H6VRG1,P04264	KRT1	66040.3	12	13	17	GGGGGGYGSGGSSYGSGGGSYGSGGGGGGGR	R	G	0.997	171	25	23.7	171	0	1	2	0	2	2383.95	2608.09	5694990	519	549
Mudpit_Aged L3 4 Anterior NP IAF	Keratin 1 OS=Homo sapiens GN=KRT1 PE=3 SV=1	H6VRF8,H6VRG0,H6VRG1,P04264	KRT1	66040.3	12	13	17	GSYGSGGSSYGSGGGSYGSGGGGGGHGSYGSGSSSGGYR	R	G	0.997	108	25	19.8	108	0	0	3	0	2	3312.31	3878.22	14459700	550	588
Mudpit_Aged L3 4 Anterior NP IAF	Keratin 1 OS=Homo sapiens GN=KRT1 PE=3 SV=1	H6VRF8,H6VRG0,H6VRG1,P04264	KRT1	66040.3	12	13	17	SGGGFSSGSAGIINYQR	R	R	0.997	101	26.2	19.3	101	0	1	0	0	2	1657.79	5384.37	8038090	13	29
Mudpit_Aged L3 4 Anterior NP IAF	Keratin 1 OS=Homo sapiens GN=KRT1 PE=3 SV=1	H6VRF8,H6VRG0,H6VRG1,P04264	KRT1	66040.3	12	13	17	SLDLDSIIAEVK	R	A	0.997	65.4	27.3	17.1	65.4	0	1	0	0	2	1302.72	9135	24612700	344	355
Mudpit_Aged L3 4 Anterior NP IAF	Keratin 1 OS=Homo sapiens GN=KRT1 PE=3 SV=1	H6VRF8,H6VRG0,H6VRG1,P04264	KRT1	66040.3	12	13	17	SLNNQFASFIDKVR	K	F	0.987	52.7	26	16.3	52.7	0	0	1	0	2	1638.86	9175.68	21511800	186	199
Mudpit_Aged L3 4 Anterior NP IAF	Keratin 1 OS=Homo sapiens GN=KRT1 PE=3 SV=1	H6VRF8,H6VRG0,H6VRG1,P04264	KRT1	66040.3	12	13	17	THNLEPYFESFINNLR	R	R	0.98	40	27.2	15.5	40	0	0	2	0	2	1993.98	9752.88	4095190	224	239
Mudpit_Aged L3 4 Anterior NP IAF	Keratin 1 OS=Homo sapiens GN=KRT1 PE=3 SV=1	H6VRF8,H6VRG0,H6VRG1,P04264	KRT1	66040.3	12	13	17	TNAENEFVTIK	R	K	0.997	57	26.5	16.6	57	0	1	0	0	2	1265.64	5026.15	8513110	278	288
Mudpit_Aged L3 4 Anterior NP IAF	Keratin 1 OS=Homo sapiens GN=KRT1 PE=3 SV=1	H6VRF8,H6VRG0,H6VRG1,P04264	KRT1	66040.3	12	13	17	TNAENEFVTIKK	R	D	0.997	43.3	25.8	15.7	43.3	0	1	0	0	2	1393.73	4628.75	7315330	278	289
Mudpit_Aged L3 4 Anterior NP IAF	Keratin 1 OS=Homo sapiens GN=KRT1 PE=3 SV=1	H6VRF8,H6VRG0,H6VRG1,P04264	KRT1	66040.3	12	13	17	WELLQQVDTSTR	K	T	0.997	54	26.9	16.4	54	0	1	0	0	2	1475.75	7112.59	11449800	212	223
Mudpit_Aged L3 4 Anterior NP IAF	Keratin 1 OS=Homo sapiens GN=KRT1 PE=3 SV=1	H6VRF8,H6VRG0,H6VRG1,P04264	KRT1	66040.3	12	13	17	YEELQITAGR	K	H	0.997	46.7	26.6	15.9	46.7	0	1	0	0	2	1179.6	4591.74	18136900	377	386
Mudpit_Aged L3 4 Anterior NP IAF	Protein disulfide-isomerase OS=Homo sapiens GN=P4HB PE=3 SV=1	A0A024R8S5,P07237	P4HB	57118.1	4	5	5	ILEFFGLK	R	K	0.99	51.8	25	31.1	37	0	1	0	0	2	966.566	8988.58	16896400	301	308
Mudpit_Aged L3 4 Anterior NP IAF	Protein disulfide-isomerase OS=Homo sapiens GN=P4HB PE=3 SV=1	A0A024R8S5,P07237	P4HB	57118.1	4	5	5	NFEDVAFDEK	K	K	0.997	55.6	25	16.5	55.6	0	1	0	0	2	1213.54	5977.57	4634340	376	385
Mudpit_Aged L3 4 Anterior NP IAF	Protein disulfide-isomerase OS=Homo sapiens GN=P4HB PE=3 SV=1	A0A024R8S5,P07237	P4HB	57118.1	4	5	5	VDATEESDLAQQYGVR	K	G	0.997	71.7	25	17.5	71.7	0	0	1	0	2	1780.83	5940.18	4088130	82	97
Mudpit_Aged L3 4 Anterior NP IAF	Protein disulfide-isomerase OS=Homo sapiens GN=P4HB PE=3 SV=1	A0A024R8S5,P07237	P4HB	57118.1	4	5	5	YKPESEELTAER	K	I	0.993	54.9	26	16.4	54.9	0	1	1	0	2	1451.7	5295.24	5246770	327	338
Mudpit_Aged L3 4 Anterior NP IAF	Heat shock protein 90kDa alpha (Cytosolic), class B member 1, isoform CRA_a OS=Homo sapiens GN=HSP90AB1 PE=3 SV=1	A0A024RD80,B4DMA2,P08238	HSP90AB1	83267.3	7	7	8	EDQTEYLEER	K	R	0.991	30.1	25	14.9	30.1	0	1	0	0	2	1311.57	3840.77	8422480	187	196
Mudpit_Aged L3 4 Anterior NP IAF	Heat shock protein 90kDa alpha (Cytosolic), class B member 1, isoform CRA_a OS=Homo sapiens GN=HSP90AB1 PE=3 SV=1	A0A024RD80,B4DMA2,P08238	HSP90AB1	83267.3	7	7	8	ELISNASDALDK	R	I	0.997	54.2	27	16.4	54.2	0	3	0	0	2	1275.64	4957.66	20780600	42	53
Mudpit_Aged L3 4 Anterior NP IAF	Heat shock protein 90kDa alpha (Cytosolic), class B member 1, isoform CRA_a OS=Homo sapiens GN=HSP90AB1 PE=3 SV=1	A0A024RD80,B4DMA2,P08238	HSP90AB1	83267.3	7	7	8	EQVANSAFVER	K	V	0.992	35	29	15.2	35	0	1	0	0	2	1249.62	3642.64	4820920	492	502
Mudpit_Aged L3 4 Anterior NP IAF	Heat shock protein 90kDa alpha (Cytosolic), class B member 1, isoform CRA_a OS=Homo sapiens GN=HSP90AB1 PE=3 SV=1	A0A024RD80,B4DMA2,P08238	HSP90AB1	83267.3	7	7	8	GVVDSEDLPLNISR	R	E	0.997	86.9	27	18.4	0	0	1	0	0	2	1513.79	7102.84	14321700	379	392
Mudpit_Aged L3 4 Anterior NP IAF	Heat shock protein 90kDa alpha (Cytosolic), class B member 1, isoform CRA_a OS=Homo sapiens GN=HSP90AB1 PE=3 SV=1	A0A024RD80,B4DMA2,P08238	HSP90AB1	83267.3	7	7	8	HLEINPDHPIVETLR	K	Q	0.991	46.4	26.1	15.9	46.4	0	0	2	0	2	1782.95	8861.25	21180500	625	639
Mudpit_Aged L3 4 Anterior NP IAF	Heat shock protein 90kDa alpha (Cytosolic), class B member 1, isoform CRA_a OS=Homo sapiens GN=HSP90AB1 PE=3 SV=1	A0A024RD80,B4DMA2,P08238	HSP90AB1	83267.3	7	7	8	IDIIPNPQER	K	T	0.994	33.7	26.4	15.1	33.7	0	1	0	0	2	1194.65	5728.19	4501220	73	82
Mudpit_Aged L3 4 Anterior NP IAF	Heat shock protein 90kDa alpha (Cytosolic), class B member 1, isoform CRA_a OS=Homo sapiens GN=HSP90AB1 PE=3 SV=1	A0A024RD80,B4DMA2,P08238	HSP90AB1	83267.3	7	7	8	NPDDITQEEYGEFYK	R	S	0.997	86.9	25	18.4	86.9	0	1	0	0	2	1847.8	6702.27	3339440	292	306
Mudpit_Aged L3 4 Anterior NP IAF	Heat shock protein 90kDa alpha (Cytosolic), class B member 1, isoform CRA_a OS=Homo sapiens GN=HSP90AB1 PE=3 SV=1	A0A024RD80,B4DMA2,P08238	HSP90AB1	83267.3	7	7	8	YIDQEELNK	K	T	0.976	28.7	26.2	14.8	28.7	0	1	0	0	2	1151.56	2960.87	7333260	276	284
Mudpit_Aged L3 4 Anterior NP IAF	Integrin, alpha 5 (Fibronectin receptor, alpha polypeptide), isoform CRA_b OS=Homo sapiens GN=ITGA5 PE=3 SV=1	A0A024RB01,A8K6A5,B2R627,P08648	ITGA5	114538	2	2	2	LLESSLSSSEGEEPVEYK	R	S	0.997	86.7	25	18.4	86.7	0	1	0	0	2	1982.94	5915.39	1441670	120	137
Mudpit_Aged L3 4 Anterior NP IAF	Integrin, alpha 5 (Fibronectin receptor, alpha polypeptide), isoform CRA_b OS=Homo sapiens GN=ITGA5 PE=3 SV=1	A0A024RB01,A8K6A5,B2R627,P08648	ITGA5	114538	2	2	2	VTAPPEAEYSGLVR	R	H	0.997	54.4	26.1	16.4	54.4	0	1	0	0	2	1488.77	5800.81	4826010	695	708
Mudpit_Aged L3 4 Anterior NP IAF	Uncharacterized protein OS=Homo sapiens PE=2 SV=1	Q6GMV8		24909.1	6	9	76	AAPSVTLFPPSSEELQANK	K	A	0.997	80.8	26.6	18	80.8	0	32	21	0	2	1986.02	7749.82	2283100000	133	151
Mudpit_Aged L3 4 Anterior NP IAF	Uncharacterized protein OS=Homo sapiens PE=2 SV=1	Q6GMV8		24909.1	6	9	76	AGVETTTPSK	K	Q	0.997	61.1	27.6	18.5	59.4	0	2	0	0	2	990.51	1530.29	641979	179	188
Mudpit_Aged L3 4 Anterior NP IAF	Uncharacterized protein OS=Homo sapiens PE=2 SV=1	Q6GMV8		24909.1	6	9	76	FSGSNSGNTATLTISR	R	V	0.997	169	26.7	23.5	169	0	3	0	0	2	1612.79	4397.49	17422000	80	95
Mudpit_Aged L3 4 Anterior NP IAF	Uncharacterized protein OS=Homo sapiens PE=2 SV=1	Q6GMV8		24909.1	6	9	76	LTVLSQPK	K	A	0.982	32.5	25.5	15	32.5	0	2	0	0	2	885.54	3915.2	8771890	125	132
Mudpit_Aged L3 4 Anterior NP IAF	Uncharacterized protein OS=Homo sapiens PE=2 SV=1	Q6GMV8		24909.1	6	9	76	SYSCQVTHEGSTVEK	R	T	0.995	40.6	25	15.5	40.6	0	1	1	0	2	1712.74	4137.2	12262500	212	226
Mudpit_Aged L3 4 Anterior NP IAF	Uncharacterized protein OS=Homo sapiens PE=2 SV=1	Q6GMV8		24909.1	6	9	76	YAASSYLSLTPEQWK	K	S	0.997	110	27.2	19.9	110	0	12	2	0	2	1743.86	8854.75	109637000	194	208
Mudpit_Aged L3 4 Anterior NP IAF	C4b-binding protein beta chain OS=Homo sapiens GN=C4BPB PE=1 SV=1	P20851	C4BPB	28357.2	2	3	4	ALLAFQESK	K	N	0.99	39.1	27.2	15.4	39.1	0	1	0	0	2	1006.56	6062	3768010	205	213
Mudpit_Aged L3 4 Anterior NP IAF	C4b-binding protein beta chain OS=Homo sapiens GN=C4BPB PE=1 SV=1	P20851	C4BPB	28357.2	2	3	4	ESGMTMEELK	K	Y	0.997	76.7	25	17.8	76.7	0	3	0	0	2	1154.51	4462.89	13128100	228	237
Mudpit_Aged L3 4 Anterior NP IAF	Putative uncharacterized protein DKFZp686I04196 (Fragment) OS=Homo sapiens GN=DKFZp686I04196 PE=2 SV=1	Q6N093	DKFZp686I04196	46059.4	5	8	49	EPQVYTLPPSR	R	E	0.997	62.3	26.6	16.9	62.3	0	25	7	0	2	1286.67	4756.52	5275100000	315	325
Mudpit_Aged L3 4 Anterior NP IAF	Putative uncharacterized protein DKFZp686I04196 (Fragment) OS=Homo sapiens GN=DKFZp686I04196 PE=2 SV=1	Q6N093	DKFZp686I04196	46059.4	5	8	49	EPQVYTLPPSREEMTK	R	N	0.997	52.2	28.1	16.3	52.2	0	7	0	0	2	1904.94	5437.96	41489800	315	330
Mudpit_Aged L3 4 Anterior NP IAF	Putative uncharacterized protein DKFZp686I04196 (Fragment) OS=Homo sapiens GN=DKFZp686I04196 PE=2 SV=1	Q6N093	DKFZp686I04196	46059.4	5	8	49	FDPWGQGTLVTVSSASTK	K	G	0.997	49	27	16.1	49	0	1	0	0	2	1880.94	8227.57	14513000	78	95
Mudpit_Aged L3 4 Anterior NP IAF	Putative uncharacterized protein DKFZp686I04196 (Fragment) OS=Homo sapiens GN=DKFZp686I04196 PE=2 SV=1	Q6N093	DKFZp686I04196	46059.4	5	8	49	GFYPSDIAVEWESNGQPENNYK	K	T	0.997	78.9	25	17.9	78.9	0	4	4	0	2	2544.13	8962.18	195128000	341	362
Mudpit_Aged L3 4 Anterior NP IAF	Putative uncharacterized protein DKFZp686I04196 (Fragment) OS=Homo sapiens GN=DKFZp686I04196 PE=2 SV=1	Q6N093	DKFZp686I04196	46059.4	5	8	49	GLPAPIEK	K	T	0.985	31.1	25	14.9	31.1	0	5	0	0	2	824.488	3743.74	154155000	297	304
Mudpit_Aged L3 4 Anterior NP IAF	Putative uncharacterized protein DKFZp686I04196 (Fragment) OS=Homo sapiens GN=DKFZp686I04196 PE=2 SV=1	Q6N093	DKFZp686I04196	46059.4	5	8	49	NQVSLTCLVK	K	G	0.997	40.9	26.9	15.6	40.9	0	3	0	0	2	1162.61	6928.51	51625800	331	340
Mudpit_Aged L3 4 Anterior NP IAF	Putative uncharacterized protein DKFZp686I04196 (Fragment) OS=Homo sapiens GN=DKFZp686I04196 PE=2 SV=1	Q6N093	DKFZp686I04196	46059.4	5	8	49	STSESTAALGCLVK	R	D	0.997	44.7	25.9	15.8	44.7	0	1	0	0	2	1424.69	5966.62	8356730	108	121
Mudpit_Aged L3 4 Anterior NP IAF	Putative uncharacterized protein DKFZp686I04196 (Fragment) OS=Homo sapiens GN=DKFZp686I04196 PE=2 SV=1	Q6N093	DKFZp686I04196	46059.4	5	8	49	TTPPMLDSDGSFFLYSK	K	L	0.997	98.2	25	19.1	98.2	0	31	10	0	2	1905.89	8870.67	614458000	363	379
Mudpit_Aged L3 4 Anterior NP IAF	Putative uncharacterized protein DKFZp686I04196 (Fragment) OS=Homo sapiens GN=DKFZp686I04196 PE=2 SV=1	Q6N093	DKFZp686I04196	46059.4	5	8	49	VVSVLTVVHQDWLNGK	R	E	0.99	45	25	15.8	45	0	0	1	0	2	1793.99	9189.98	48309100	272	287
Mudpit_Aged L3 4 Anterior NP IAF	Plectin OS=Homo sapiens GN=PLEC PE=1 SV=3	Q15149	PLEC	531784	2	2	2	GGELVYTDSEAR	K	D	0.953	28.9	29.3	15.2	28.5	0	1	0	0	2	1296.61	3954.83	2053710	3028	3039
Mudpit_Aged L3 4 Anterior NP IAF	Plectin OS=Homo sapiens GN=PLEC PE=1 SV=3	Q15149	PLEC	531784	2	2	2	VLALPEPSPAAPTLR	K	S	0.99	30.1	25	14.9	30.1	0	1	0	0	2	1531.88	7599.74	2184990	1187	1201
Mudpit_Aged L3 4 Anterior NP IAF	Inter-alpha-trypsin inhibitor heavy chain H5 OS=Homo sapiens GN=ITIH5 PE=2 SV=2	Q86UX2	ITIH5	104579	9	9	12	AAFFLSYEELLQR	K	R	0.997	63.4	26.9	17	63.4	0	1	0	0	2	1586.82	9317.04	14264500	153	165
Mudpit_Aged L3 4 Anterior NP IAF	Inter-alpha-trypsin inhibitor heavy chain H5 OS=Homo sapiens GN=ITIH5 PE=2 SV=2	Q86UX2	ITIH5	104579	9	9	12	AQALAVSYR	R	F	0.988	32.5	26.7	15	32.5	0	2	0	0	2	978.537	3515.83	11928700	605	613
Mudpit_Aged L3 4 Anterior NP IAF	Inter-alpha-trypsin inhibitor heavy chain H5 OS=Homo sapiens GN=ITIH5 PE=2 SV=2	Q86UX2	ITIH5	104579	9	9	12	DHLISVTPDSIR	K	D	0.991	34.2	28.3	20.2	29.1	0	1	0	0	2	1352.72	6491.88	8119420	345	356
Mudpit_Aged L3 4 Anterior NP IAF	Inter-alpha-trypsin inhibitor heavy chain H5 OS=Homo sapiens GN=ITIH5 PE=2 SV=2	Q86UX2	ITIH5	104579	9	9	12	IYNGEEQIDCWFAR	K	N	0.997	42.5	25	15.7	42.5	0	1	0	0	2	1801.79	8489.23	11585000	895	908
Mudpit_Aged L3 4 Anterior NP IAF	Inter-alpha-trypsin inhibitor heavy chain H5 OS=Homo sapiens GN=ITIH5 PE=2 SV=2	Q86UX2	ITIH5	104579	9	9	12	LSLENCGLTR	K	R	0.984	32.8	26.8	15.1	32.8	0	1	0	0	2	1163.57	5004.54	7977730	450	459
Mudpit_Aged L3 4 Anterior NP IAF	Inter-alpha-trypsin inhibitor heavy chain H5 OS=Homo sapiens GN=ITIH5 PE=2 SV=2	Q86UX2	ITIH5	104579	9	9	12	LWSYLTTK	R	E	0.95	25.2	25.2	14.6	25.2	0	1	0	0	2	1011.55	6204.86	7035470	576	583
Mudpit_Aged L3 4 Anterior NP IAF	Inter-alpha-trypsin inhibitor heavy chain H5 OS=Homo sapiens GN=ITIH5 PE=2 SV=2	Q86UX2	ITIH5	104579	9	9	12	SYLEITPSR	R	V	0.997	51.2	26.7	16.2	51.2	0	2	0	0	2	1065.56	4767.86	29380900	754	762
Mudpit_Aged L3 4 Anterior NP IAF	Inter-alpha-trypsin inhibitor heavy chain H5 OS=Homo sapiens GN=ITIH5 PE=2 SV=2	Q86UX2	ITIH5	104579	9	9	12	TPLLSDIR	R	I	0.99	41.8	26.8	27.4	30	0	2	0	0	2	914.531	5428.11	18178300	480	487
Mudpit_Aged L3 4 Anterior NP IAF	Inter-alpha-trypsin inhibitor heavy chain H5 OS=Homo sapiens GN=ITIH5 PE=2 SV=2	Q86UX2	ITIH5	104579	9	9	12	VYQGEITER	K	E	0.988	31.3	26.9	15	31.3	0	1	0	0	2	1094.55	2635.07	5044010	106	114
Mudpit_Aged L3 4 Anterior NP IAF	Thrombospondin 1, isoform CRA_a OS=Homo sapiens GN=THBS1 PE=4 SV=1	A0A024R9Q1,P07996	THBS1	129382	13	16	24	AQGYSGLSVK	R	V	0.994	36.1	26.1	15.3	36.1	0	2	0	0	2	1009.53	3519.35	9895990	1055	1064
Mudpit_Aged L3 4 Anterior NP IAF	Thrombospondin 1, isoform CRA_a OS=Homo sapiens GN=THBS1 PE=4 SV=1	A0A024R9Q1,P07996	THBS1	129382	13	16	24	DDDYAGFVFGYQSSSR	R	F	0.997	60.4	25	16.8	60.4	0	1	0	0	2	1813.77	8330.68	4422300	1019	1034
Mudpit_Aged L3 4 Anterior NP IAF	Thrombospondin 1, isoform CRA_a OS=Homo sapiens GN=THBS1 PE=4 SV=1	A0A024R9Q1,P07996	THBS1	129382	13	16	24	FQDLVDAVR	K	A	0.997	45.4	28.6	15.8	45.4	0	1	0	0	2	1062.56	5722.45	20774500	75	83
Mudpit_Aged L3 4 Anterior NP IAF	Thrombospondin 1, isoform CRA_a OS=Homo sapiens GN=THBS1 PE=4 SV=1	A0A024R9Q1,P07996	THBS1	129382	13	16	24	FVFGTTPEDILR	R	N	0.997	62.4	26.6	16.9	62.4	0	3	0	0	2	1394.73	9057.29	130006000	217	228
Mudpit_Aged L3 4 Anterior NP IAF	Thrombospondin 1, isoform CRA_a OS=Homo sapiens GN=THBS1 PE=4 SV=1	A0A024R9Q1,P07996	THBS1	129382	13	16	24	GPDPSSPAFR	K	I	0.997	46.1	25	15.9	46.1	0	2	0	0	2	1030.5	3024.26	14320800	51	60
Mudpit_Aged L3 4 Anterior NP IAF	Thrombospondin 1, isoform CRA_a OS=Homo sapiens GN=THBS1 PE=4 SV=1	A0A024R9Q1,P07996	THBS1	129382	13	16	24	GTSQNDPNWVVR	K	H	0.997	82	25	20.4	79.7	0	2	0	0	2	1372.66	4286.88	26444400	969	980
Mudpit_Aged L3 4 Anterior NP IAF	Thrombospondin 1, isoform CRA_a OS=Homo sapiens GN=THBS1 PE=4 SV=1	A0A024R9Q1,P07996	THBS1	129382	13	16	24	IEDANLIPPVPDDK	R	F	0.997	64.8	27.6	20.3	61.6	0	1	0	0	2	1535.8	6879.76	6309470	61	74
Mudpit_Aged L3 4 Anterior NP IAF	Thrombospondin 1, isoform CRA_a OS=Homo sapiens GN=THBS1 PE=4 SV=1	A0A024R9Q1,P07996	THBS1	129382	13	16	24	IMADSGPIYDK	K	T	0.997	45.2	25.3	15.8	45.2	0	4	0	0	2	1209.58	3205.38	29905000	1131	1141
Mudpit_Aged L3 4 Anterior NP IAF	Thrombospondin 1, isoform CRA_a OS=Homo sapiens GN=THBS1 PE=4 SV=1	A0A024R9Q1,P07996	THBS1	129382	13	16	24	MENAELDVPIQSVFTR	K	D	0.997	96	27.3	19	96	0	2	1	0	2	1864.91	8426.55	25896900	174	189
Mudpit_Aged L3 4 Anterior NP IAF	Thrombospondin 1, isoform CRA_a OS=Homo sapiens GN=THBS1 PE=4 SV=1	A0A024R9Q1,P07996	THBS1	129382	13	16	24	QVTQSYWDTNPTR	K	A	0.997	77.6	25	21.4	74	0	1	0	0	2	1595.74	4692.56	6967910	1042	1054
Mudpit_Aged L3 4 Anterior NP IAF	Thrombospondin 1, isoform CRA_a OS=Homo sapiens GN=THBS1 PE=4 SV=1	A0A024R9Q1,P07996	THBS1	129382	13	16	24	SITLFVQEDR	K	A	0.989	32	26.8	15	32	0	1	0	0	2	1207.63	6388.88	15843000	155	164
Mudpit_Aged L3 4 Anterior NP IAF	Thrombospondin 1, isoform CRA_a OS=Homo sapiens GN=THBS1 PE=4 SV=1	A0A024R9Q1,P07996	THBS1	129382	13	16	24	TIVTTLQDSIR	R	K	0.997	76.6	26.7	17.8	76.6	0	2	0	0	2	1246.7	7105.25	60730500	289	299
Mudpit_Aged L3 4 Anterior NP IAF	Thrombospondin 1, isoform CRA_a OS=Homo sapiens GN=THBS1 PE=4 SV=1	A0A024R9Q1,P07996	THBS1	129382	13	16	24	VTEENKELANELR	K	R	0.946	38.5	33.7	15.4	38.5	0	0	1	0	2	1544.79	6459.49	14288500	301	313
Mudpit_Aged L3 4 Anterior NP IAF	GCT-A4 light chain variable region (Fragment) OS=Homo sapiens PE=2 SV=1	A0A0X9T7V9		11845.8	2	3	6	DIVMTQSPGTLSLSPGER	-	A	0.997	44.8	26.6	15.8	44.8	0	2	0	0	2	1903.94	5546.41	12717000	1	18
Mudpit_Aged L3 4 Anterior NP IAF	GCT-A4 light chain variable region (Fragment) OS=Homo sapiens PE=2 SV=1	A0A0X9T7V9		11845.8	2	3	6	FSGSGSGTDFTLTISR	R	L	0.997	133	27.2	27.5	127	0	11	1	0	2	1632.79	7150.32	101587000	63	78
Mudpit_Aged L3 4 Anterior NP IAF	GCT-A4 light chain variable region (Fragment) OS=Homo sapiens PE=2 SV=1	A0A0X9T7V9		11845.8	2	3	6	LLIYGASTR	R	A	0.995	35.2	25	16.1	34.3	0	4	0	0	2	993.573	4969.61	34803800	47	55
Mudpit_Aged L3 4 Anterior NP IAF	Ig gamma-4 chain C region OS=Homo sapiens GN=IGHG4 PE=1 SV=1	A0A286YFJ8_HUMAN,P01861	IGHG4	35939.5	3	5	24	EPQVYTLPPSQEEMTK	R	N	0.997	59.5	25.4	16.7	59.5	0	17	0	0	2	1876.9	4971.6	231447000	225	240
Mudpit_Aged L3 4 Anterior NP IAF	Ig gamma-4 chain C region OS=Homo sapiens GN=IGHG4 PE=1 SV=1	A0A286YFJ8_HUMAN,P01861	IGHG4	35939.5	3	5	24	GFYPSDIAVEWESNGQPENNYK	K	T	0.997	78.9	25	17.9	78.9	0	4	4	0	2	2544.13	8962.18	195128000	251	272
Mudpit_Aged L3 4 Anterior NP IAF	Ig gamma-4 chain C region OS=Homo sapiens GN=IGHG4 PE=1 SV=1	A0A286YFJ8_HUMAN,P01861	IGHG4	35939.5	3	5	24	GLPSSIEK	K	T	0.979	30.6	26.9	20.7	24.8	0	1	0	0	2	830.462	3112.13	5813390	207	214
Mudpit_Aged L3 4 Anterior NP IAF	Ig gamma-4 chain C region OS=Homo sapiens GN=IGHG4 PE=1 SV=1	A0A286YFJ8_HUMAN,P01861	IGHG4	35939.5	3	5	24	NQVSLTCLVK	K	G	0.997	40.9	26.9	15.6	40.9	0	3	0	0	2	1162.61	6928.51	51625800	241	250
Mudpit_Aged L3 4 Anterior NP IAF	Ig gamma-4 chain C region OS=Homo sapiens GN=IGHG4 PE=1 SV=1	A0A286YFJ8_HUMAN,P01861	IGHG4	35939.5	3	5	24	STSESTAALGCLVK	R	D	0.997	44.7	25.9	15.8	44.7	0	1	0	0	2	1424.69	5966.62	8356730	17	30
Mudpit_Aged L3 4 Anterior NP IAF	Ig gamma-4 chain C region OS=Homo sapiens GN=IGHG4 PE=1 SV=1	A0A286YFJ8_HUMAN,P01861	IGHG4	35939.5	3	5	24	TTPPVLDSDGSFFLYSR	K	L	0.997	80.7	26.4	19.2	79.5	0	4	2	0	2	1901.93	9093.9	210999000	273	289
Mudpit_Aged L3 4 Anterior NP IAF	Ig gamma-4 chain C region OS=Homo sapiens GN=IGHG4 PE=1 SV=1	A0A286YFJ8_HUMAN,P01861	IGHG4	35939.5	3	5	24	VVSVLTVLHQDWLNGK	R	E	0.997	80.4	25	18	80.4	0	1	1	0	2	1808.01	9442.08	370000000	182	197
Mudpit_Aged L3 4 Anterior NP IAF	Serpin peptidase inhibitor, clade A (Alpha-1 antiproteinase, antitrypsin), member 10, isoform CRA_b OS=Homo sapiens GN=SERPINA10 PE=3 SV=1	A0A024R6I6,B2RBZ5,G3V2W1,Q9UK55	SERPINA10	50708.7	6	8	12	ETSNFGFSLLR	K	K	0.997	55	25.1	16.4	55	0	1	0	0	2	1270.64	8983.83	17840000	78	88
Mudpit_Aged L3 4 Anterior NP IAF	Serpin peptidase inhibitor, clade A (Alpha-1 antiproteinase, antitrypsin), member 10, isoform CRA_b OS=Homo sapiens GN=SERPINA10 PE=3 SV=1	A0A024R6I6,B2RBZ5,G3V2W1,Q9UK55	SERPINA10	50708.7	6	8	12	IFSPFADLSELSATGR	R	N	0.997	104	26.6	19.5	104	0	1	1	0	2	1710.87	9262.67	48214900	360	375
Mudpit_Aged L3 4 Anterior NP IAF	Serpin peptidase inhibitor, clade A (Alpha-1 antiproteinase, antitrypsin), member 10, isoform CRA_b OS=Homo sapiens GN=SERPINA10 PE=3 SV=1	A0A024R6I6,B2RBZ5,G3V2W1,Q9UK55	SERPINA10	50708.7	6	8	12	LFDEINPETK	K	L	0.997	53.4	26.5	16.3	53.4	0	3	0	0	2	1205.61	5427.02	24091200	220	229
Mudpit_Aged L3 4 Anterior NP IAF	Serpin peptidase inhibitor, clade A (Alpha-1 antiproteinase, antitrypsin), member 10, isoform CRA_b OS=Homo sapiens GN=SERPINA10 PE=3 SV=1	A0A024R6I6,B2RBZ5,G3V2W1,Q9UK55	SERPINA10	50708.7	6	8	12	NMEVFFPK	R	F	0.99	34.9	25.7	15.2	34.9	0	3	0	0	2	1011.5	7934.85	9119330	332	339
Mudpit_Aged L3 4 Anterior NP IAF	Serpin peptidase inhibitor, clade A (Alpha-1 antiproteinase, antitrypsin), member 10, isoform CRA_b OS=Homo sapiens GN=SERPINA10 PE=3 SV=1	A0A024R6I6,B2RBZ5,G3V2W1,Q9UK55	SERPINA10	50708.7	6	8	12	WLTPFDPVFTEVDTFHLDK	K	Y	0.966	41.2	32.8	15.6	41.2	0	0	1	0	2	2307.13	9751.53	3660420	242	260
Mudpit_Aged L3 4 Anterior NP IAF	Serpin peptidase inhibitor, clade A (Alpha-1 antiproteinase, antitrypsin), member 10, isoform CRA_b OS=Homo sapiens GN=SERPINA10 PE=3 SV=1	A0A024R6I6,B2RBZ5,G3V2W1,Q9UK55	SERPINA10	50708.7	6	8	12	YEMHELLR	K	Q	0.99	41.3	27.5	15.6	41.3	0	1	1	0	2	1090.54	5238.09	15047000	346	353
Mudpit_Aged L3 4 Anterior NP IAF	Procollagen C-endopeptidase enhancer OS=Homo sapiens GN=PCOLCE PE=4 SV=1	A4D2D2,Q15113	PCOLCE	47972.5	5	6	20	GESGYVASEGFPNLYPPNK	K	E	0.997	89.7	25	18.6	89.7	0	7	0	0	2	2025.96	7638.97	36806200	43	61
Mudpit_Aged L3 4 Anterior NP IAF	Procollagen C-endopeptidase enhancer OS=Homo sapiens GN=PCOLCE PE=4 SV=1	A4D2D2,Q15113	PCOLCE	47972.5	5	6	20	GVSYLLMGQVEENR	K	G	0.997	68.4	26.1	17.3	68.4	0	3	0	0	2	1594.79	6611.08	24241800	395	408
Mudpit_Aged L3 4 Anterior NP IAF	Procollagen C-endopeptidase enhancer OS=Homo sapiens GN=PCOLCE PE=4 SV=1	A4D2D2,Q15113	PCOLCE	47972.5	5	6	20	TGGLDLPSPPTGASLK	K	F	0.997	74.7	25.2	18.5	73.8	0	8	0	0	2	1510.81	6978.61	68248800	366	381
Mudpit_Aged L3 4 Anterior NP IAF	Procollagen C-endopeptidase enhancer OS=Homo sapiens GN=PCOLCE PE=4 SV=1	A4D2D2,Q15113	PCOLCE	47972.5	5	6	20	YDALEVFAGSGTSGQR	R	L	0.997	42.1	25.9	15.6	42.1	0	1	0	0	2	1657.78	7722.95	4543890	92	107
Mudpit_Aged L3 4 Anterior NP IAF	Procollagen C-endopeptidase enhancer OS=Homo sapiens GN=PCOLCE PE=4 SV=1	A4D2D2,Q15113	PCOLCE	47972.5	5	6	20	YDSVSVFNGAVSDDSR	R	R	0.997	114	25	20.1	114	0	1	0	0	2	1717.77	6030.51	8215860	215	230
Mudpit_Aged L3 4 Anterior NP IAF	MS-C1 light chain variable region (Fragment) OS=Homo sapiens PE=2 SV=1	A0A109PW33		11796.6	2	5	18	DIQMTQSPSSLSASVGDR	-	V	0.997	134	25	21.4	134	0	12	4	0	2	1894.88	4910.52	255751000	1	18
Mudpit_Aged L3 4 Anterior NP IAF	MS-C1 light chain variable region (Fragment) OS=Homo sapiens PE=2 SV=1	A0A109PW33		11796.6	2	5	18	LLIYDASNLK	K	T	0.997	38.8	25.8	24.9	29.3	0	2	0	0	2	1149.65	6987.85	11328500	46	55
Mudpit_Aged L3 4 Anterior NP IAF	N-acetylmuramoyl-L-alanine amidase OS=Homo sapiens GN=PGLYRP2 PE=1 SV=1	Q96PD5	PGLYRP2	62217.9	5	7	14	AGLLRPDYALLGHR	R	Q	0.964	37.3	25	15.3	37.3	0	0	2	0	2	1551.88	9669.67	4736020	510	523
Mudpit_Aged L3 4 Anterior NP IAF	N-acetylmuramoyl-L-alanine amidase OS=Homo sapiens GN=PGLYRP2 PE=1 SV=1	Q96PD5	PGLYRP2	62217.9	5	7	14	DGSPDVTTADIGANTPDATK	R	G	0.997	126	25	20.9	126	0	4	3	0	2	1945.9	4929.06	77921300	175	194
Mudpit_Aged L3 4 Anterior NP IAF	N-acetylmuramoyl-L-alanine amidase OS=Homo sapiens GN=PGLYRP2 PE=1 SV=1	Q96PD5	PGLYRP2	62217.9	5	7	14	EYGVVLAPDGSTVAVEPLLAGLEAGLQGR	K	R	0.997	97.4	25	19.1	97.4	0	1	1	0	2	2881.53	9495.51	19301600	107	135
Mudpit_Aged L3 4 Anterior NP IAF	N-acetylmuramoyl-L-alanine amidase OS=Homo sapiens GN=PGLYRP2 PE=1 SV=1	Q96PD5	PGLYRP2	62217.9	5	7	14	GSQTQSHPDLGTEGCWDQLSAPR	R	T	0.997	80.5	25	18	80.5	0	1	0	0	2	2528.11	6348.78	10196200	234	256
Mudpit_Aged L3 4 Anterior NP IAF	N-acetylmuramoyl-L-alanine amidase OS=Homo sapiens GN=PGLYRP2 PE=1 SV=1	Q96PD5	PGLYRP2	62217.9	5	7	14	TFTLLDPK	R	A	0.99	47.9	27.3	17	46.9	0	2	0	0	2	934.525	6621.87	81374400	257	264
Mudpit_Aged L3 4 Anterior NP IAF	Polymeric immunoglobulin receptor OS=Homo sapiens GN=PIGR PE=1 SV=4	P01833	PIGR	83283.4	2	2	3	ILLNPQDK	R	D	0.961	26.5	25	27.2	14	0	1	0	0	2	940.546	3693.33	6668490	297	304
Mudpit_Aged L3 4 Anterior NP IAF	Polymeric immunoglobulin receptor OS=Homo sapiens GN=PIGR PE=1 SV=4	P01833	PIGR	83283.4	2	2	3	NADLQVLKPEPELVYEDLR	K	G	0.997	68	25.7	17.2	68	0	0	2	0	2	2241.18	9223.61	37935000	232	250
Mudpit_Aged L3 4 Anterior NP IAF	Laminin, gamma 1 (Formerly LAMB2), isoform CRA_a OS=Homo sapiens GN=LAMC1 PE=4 SV=1	A0A024R972,P11047	LAMC1	177601	4	4	4	EAQQALGSAAADATEAK	R	N	0.997	71.7	26.2	17.5	71.7	0	1	0	0	2	1631.79	4193.5	2363710	1407	1423
Mudpit_Aged L3 4 Anterior NP IAF	Laminin, gamma 1 (Formerly LAMB2), isoform CRA_a OS=Homo sapiens GN=LAMC1 PE=4 SV=1	A0A024R972,P11047	LAMC1	177601	4	4	4	LNTFGDEVFNDPK	R	V	0.992	34.4	25.5	15.2	34.4	0	1	0	0	2	1495.71	6538.5	3788550	256	268
Mudpit_Aged L3 4 Anterior NP IAF	Laminin, gamma 1 (Formerly LAMB2), isoform CRA_a OS=Homo sapiens GN=LAMC1 PE=4 SV=1	A0A024R972,P11047	LAMC1	177601	4	4	4	NTIEETGNLAEQAR	R	A	0.997	75.9	25.7	17.7	75.9	0	1	0	0	2	1545.75	4332.56	4232200	1122	1135
Mudpit_Aged L3 4 Anterior NP IAF	Laminin, gamma 1 (Formerly LAMB2), isoform CRA_a OS=Homo sapiens GN=LAMC1 PE=4 SV=1	A0A024R972,P11047	LAMC1	177601	4	4	4	QDIAVISDSYFPR	R	Y	0.997	56.2	26.8	16.5	56.2	0	1	0	0	2	1510.75	7772.51	5266630	545	557
Mudpit_Aged L3 4 Anterior NP IAF	Latent-transforming growth factor beta-binding protein 2 OS=Homo sapiens GN=LTBP2 PE=1 SV=1	G3V3X5,G3V511,Q14767,Q6AZ94	LTBP2	195043	4	4	5	EQDAPVAGLQPVER	R	A	0.997	63.8	27.7	17	63.8	0	1	0	0	2	1508.77	4921.14	5462150	74	87
Mudpit_Aged L3 4 Anterior NP IAF	Latent-transforming growth factor beta-binding protein 2 OS=Homo sapiens GN=LTBP2 PE=1 SV=1	G3V3X5,G3V511,Q14767,Q6AZ94	LTBP2	195043	4	4	5	GAGGQSMSEAPTGDHAPAPTR	R	M	0.99	45.3	25	15.8	45.3	0	0	2	0	2	2010.89	2151.67	10526300	1390	1410
Mudpit_Aged L3 4 Anterior NP IAF	Latent-transforming growth factor beta-binding protein 2 OS=Homo sapiens GN=LTBP2 PE=1 SV=1	G3V3X5,G3V511,Q14767,Q6AZ94	LTBP2	195043	4	4	5	GDTTTLYSQGGHGHDPK	R	S	0.994	33.8	25	15.1	33.8	0	1	0	0	2	1770.8	4591.46	1337640	376	392
Mudpit_Aged L3 4 Anterior NP IAF	Latent-transforming growth factor beta-binding protein 2 OS=Homo sapiens GN=LTBP2 PE=1 SV=1	G3V3X5,G3V511,Q14767,Q6AZ94	LTBP2	195043	4	4	5	STPLGQQQPAPR	R	T	0.997	52	26.3	16.2	52	0	1	0	0	2	1279.68	2406.07	4515990	124	135
Mudpit_Aged L3 4 Anterior NP IAF	cDNA FLJ78071, highly similar to Human MHC class III complement component C6 mRNA OS=Homo sapiens PE=2 SV=1	A8K8Z4,P13671	C6	104786	8	10	21	ALNHLPLEYNSALYSR	K	I	0.996	56.2	27.3	16.5	56.2	0	0	2	0	2	1860.96	9161.86	53500800	341	356
Mudpit_Aged L3 4 Anterior NP IAF	cDNA FLJ78071, highly similar to Human MHC class III complement component C6 mRNA OS=Homo sapiens PE=2 SV=1	A8K8Z4,P13671	C6	104786	8	10	21	DLHLSDVFLK	K	A	0.997	47.1	26.6	19.6	43.4	0	2	1	0	2	1186.65	8619.23	39876900	331	340
Mudpit_Aged L3 4 Anterior NP IAF	cDNA FLJ78071, highly similar to Human MHC class III complement component C6 mRNA OS=Homo sapiens PE=2 SV=1	A8K8Z4,P13671	C6	104786	8	10	21	ENPAVIDFELAPIVDLVR	K	N	0.997	65.3	25.1	17.1	65.3	0	1	0	0	2	2010.09	9597.33	4305640	478	495
Mudpit_Aged L3 4 Anterior NP IAF	cDNA FLJ78071, highly similar to Human MHC class III complement component C6 mRNA OS=Homo sapiens PE=2 SV=1	A8K8Z4,P13671	C6	104786	8	10	21	HEGSFIQGAEK	K	S	0.948	26.6	25	14.7	26.6	0	1	0	0	2	1202.58	4439.55	5885790	429	439
Mudpit_Aged L3 4 Anterior NP IAF	cDNA FLJ78071, highly similar to Human MHC class III complement component C6 mRNA OS=Homo sapiens PE=2 SV=1	A8K8Z4,P13671	C6	104786	8	10	21	QLEWGLER	R	T	0.99	38.4	28.3	34.9	18.9	0	1	0	0	2	1030.53	6061.44	15021900	842	849
Mudpit_Aged L3 4 Anterior NP IAF	cDNA FLJ78071, highly similar to Human MHC class III complement component C6 mRNA OS=Homo sapiens PE=2 SV=1	A8K8Z4,P13671	C6	104786	8	10	21	SEYGAALAWEK	R	G	0.997	45.8	25	15.9	45.8	0	1	0	0	2	1224.59	5800.73	13490700	449	459
Mudpit_Aged L3 4 Anterior NP IAF	cDNA FLJ78071, highly similar to Human MHC class III complement component C6 mRNA OS=Homo sapiens PE=2 SV=1	A8K8Z4,P13671	C6	104786	8	10	21	TFSEWLESVK	K	E	0.997	52.9	25	16.3	52.9	0	1	0	0	2	1225.61	8993.28	62084100	468	477
Mudpit_Aged L3 4 Anterior NP IAF	cDNA FLJ78071, highly similar to Human MHC class III complement component C6 mRNA OS=Homo sapiens PE=2 SV=1	A8K8Z4,P13671	C6	104786	8	10	21	VPANLENVGFEVQTAEDDLK	R	T	0.997	156	27.5	22.7	156	0	6	5	0	2	2188.08	9023.14	328827000	232	251
Mudpit_Aged L3 4 Anterior NP IAF	Endoplasmin OS=Homo sapiens GN=HSP90B1 PE=1 SV=1	P14625,Q5CAQ5,V9HWP2	HEL-S-125m,HSP90B1,TRA1	92471.7	8	8	12	EAESSPFVER	K	L	0.997	59.4	25.3	16.7	59.4	0	1	0	0	2	1150.54	3884.77	6315350	548	557
Mudpit_Aged L3 4 Anterior NP IAF	Endoplasmin OS=Homo sapiens GN=HSP90B1 PE=1 SV=1	P14625,Q5CAQ5,V9HWP2	HEL-S-125m,HSP90B1,TRA1	92471.7	8	8	12	EEASDYLELDTIK	K	N	0.997	40	25.5	15.5	40	0	1	0	0	2	1525.73	7528.63	11246500	253	265
Mudpit_Aged L3 4 Anterior NP IAF	Endoplasmin OS=Homo sapiens GN=HSP90B1 PE=1 SV=1	P14625,Q5CAQ5,V9HWP2	HEL-S-125m,HSP90B1,TRA1	92471.7	8	8	12	ELISNASDALDK	R	I	0.997	54.2	27	16.4	54.2	0	3	0	0	2	1275.64	4957.66	20780600	103	114
Mudpit_Aged L3 4 Anterior NP IAF	Endoplasmin OS=Homo sapiens GN=HSP90B1 PE=1 SV=1	P14625,Q5CAQ5,V9HWP2	HEL-S-125m,HSP90B1,TRA1	92471.7	8	8	12	FAFQAEVNR	K	M	0.997	39.9	26.5	15.5	39.9	0	2	0	0	2	1081.54	5461.96	15953400	76	84
Mudpit_Aged L3 4 Anterior NP IAF	Endoplasmin OS=Homo sapiens GN=HSP90B1 PE=1 SV=1	P14625,Q5CAQ5,V9HWP2	HEL-S-125m,HSP90B1,TRA1	92471.7	8	8	12	FQSSHHPTDITSLDQYVER	R	M	0.988	56.8	26.7	16.6	56.8	0	0	1	0	2	2260.06	8392.79	5991230	512	530
Mudpit_Aged L3 4 Anterior NP IAF	Endoplasmin OS=Homo sapiens GN=HSP90B1 PE=1 SV=1	P14625,Q5CAQ5,V9HWP2	HEL-S-125m,HSP90B1,TRA1	92471.7	8	8	12	GVVDSDDLPLNVSR	K	E	0.997	85.9	26.4	18.4	85.9	0	2	0	0	2	1485.75	6564.2	12984900	435	448
Mudpit_Aged L3 4 Anterior NP IAF	Endoplasmin OS=Homo sapiens GN=HSP90B1 PE=1 SV=1	P14625,Q5CAQ5,V9HWP2	HEL-S-125m,HSP90B1,TRA1	92471.7	8	8	12	LIINSLYK	K	N	0.97	25.6	25	20.2	20	0	1	0	0	2	963.587	6934.47	2402490	88	95
Mudpit_Aged L3 4 Anterior NP IAF	Endoplasmin OS=Homo sapiens GN=HSP90B1 PE=1 SV=1	P14625,Q5CAQ5,V9HWP2	HEL-S-125m,HSP90B1,TRA1	92471.7	8	8	12	LSLNIDPDAK	R	V	0.973	31.2	26.5	19.5	26.6	0	1	0	0	2	1085.58	5782.28	17616500	745	754
Mudpit_Aged L3 4 Anterior NP IAF	Serum amyloid P-component OS=Homo sapiens GN=APCS PE=1 SV=2	P02743,V9HWP0	APCS,HEL-S-92n	25387.7	5	5	49	AYSLFSYNTQGR	R	D	0.997	45.9	25.6	15.9	45.9	0	8	0	0	2	1406.67	6580.15	408416000	65	76
Mudpit_Aged L3 4 Anterior NP IAF	Serum amyloid P-component OS=Homo sapiens GN=APCS PE=1 SV=2	P02743,V9HWP0	APCS,HEL-S-92n	25387.7	5	5	49	DNELLVYK	R	E	0.99	53.9	26.7	16.4	53.9	0	7	0	0	2	993.525	5387.23	989303000	77	84
Mudpit_Aged L3 4 Anterior NP IAF	Serum amyloid P-component OS=Homo sapiens GN=APCS PE=1 SV=2	P02743,V9HWP0	APCS,HEL-S-92n	25387.7	5	5	49	IVLGQEQDSYGGK	K	F	0.997	92.7	26.8	18.8	92.7	0	19	0	0	2	1393.7	3806.3	1315580000	150	162
Mudpit_Aged L3 4 Anterior NP IAF	Serum amyloid P-component OS=Homo sapiens GN=APCS PE=1 SV=2	P02743,V9HWP0	APCS,HEL-S-92n	25387.7	5	5	49	QGYFVEAQPK	R	I	0.997	67.2	25.6	17.2	67.2	0	7	0	0	2	1166.58	4151.71	359164000	140	149
Mudpit_Aged L3 4 Anterior NP IAF	Serum amyloid P-component OS=Homo sapiens GN=APCS PE=1 SV=2	P02743,V9HWP0	APCS,HEL-S-92n	25387.7	5	5	49	VGEYSLYIGR	R	H	0.997	62.2	26.1	16.9	62.2	0	8	0	0	2	1156.6	6072.32	815343000	87	96
Mudpit_Aged L3 4 Anterior NP IAF	Insulin-like growth factor binding protein 3 isoform b OS=Homo sapiens PE=2 SV=1	A6XNC9,A6XND0,A6XND1,B3KRZ1,B3KTQ0,B3KTS0,B3KVF9,B3KVY6,B3KWK7,B4DN53,B4DP07,H0Y485,H0Y5K2,P17936,Q6ZSD0	IGFBP3	31674.1	2	3	6	VDYESQSTDTQNFSSESK	K	R	0.997	77.3	25	17.8	77.3	0	2	2	0	2	2051.87	3864.21	8711870	188	205
Mudpit_Aged L3 4 Anterior NP IAF	Insulin-like growth factor binding protein 3 isoform b OS=Homo sapiens PE=2 SV=1	A6XNC9,A6XND0,A6XND1,B3KRZ1,B3KTQ0,B3KTS0,B3KVF9,B3KVY6,B3KWK7,B4DN53,B4DP07,H0Y485,H0Y5K2,P17936,Q6ZSD0	IGFBP3	31674.1	2	3	6	YGQPLPGYTTK	K	G	0.995	38.5	26.3	15.4	38.5	0	2	0	0	2	1224.63	4398.04	21319200	268	278
Mudpit_Aged L3 4 Anterior NP IAF	Lipopolysaccharide-binding protein OS=Homo sapiens GN=LBP PE=1 SV=3	P18428	LBP	53386	6	9	35	ATAQMLEVMFK	R	G	0.997	72.1	34.1	17.5	72.1	0	6	0	0	2	1268.64	8009.84	45235000	238	248
Mudpit_Aged L3 4 Anterior NP IAF	Lipopolysaccharide-binding protein OS=Homo sapiens GN=LBP PE=1 SV=3	P18428	LBP	53386	6	9	35	GLQYAAQEGLLALQSELLR	K	I	0.997	131	25	21.2	131	0	2	2	0	2	2073.13	9488.93	54165100	38	56
Mudpit_Aged L3 4 Anterior NP IAF	Lipopolysaccharide-binding protein OS=Homo sapiens GN=LBP PE=1 SV=3	P18428	LBP	53386	6	9	35	ITLPDFTGDLR	R	I	0.997	58.3	26.1	16.6	58.3	0	5	0	0	2	1247.66	8776.71	61722600	57	67
Mudpit_Aged L3 4 Anterior NP IAF	Lipopolysaccharide-binding protein OS=Homo sapiens GN=LBP PE=1 SV=3	P18428	LBP	53386	6	9	35	LAEGFPLPLLK	K	R	0.997	51.9	25	16.2	51.9	0	2	0	0	2	1197.72	9178.93	55693300	444	454
Mudpit_Aged L3 4 Anterior NP IAF	Lipopolysaccharide-binding protein OS=Homo sapiens GN=LBP PE=1 SV=3	P18428	LBP	53386	6	9	35	SPVTLLAAVMSLPEEHNK	R	M	0.997	69.7	26.3	17.4	69.7	0	0	13	0	2	1936.02	10177.1	17262100	258	275
Mudpit_Aged L3 4 Anterior NP IAF	Lipopolysaccharide-binding protein OS=Homo sapiens GN=LBP PE=1 SV=3	P18428	LBP	53386	6	9	35	VQLYDLGLQIHK	R	D	0.994	59.8	25	16.7	59.8	0	1	4	0	2	1426.81	9088.35	50532000	456	467
Mudpit_Aged L3 4 Anterior NP IAF	Semaphorin-3A OS=Homo sapiens GN=SEMA3A PE=1 SV=1	Q14563	SEMA3A	88890.8	9	11	18	DGPNYQWVPYQGR	R	V	0.997	41.2	25	15.6	41.2	0	1	0	0	2	1579.73	6510.76	5428860	360	372
Mudpit_Aged L3 4 Anterior NP IAF	Semaphorin-3A OS=Homo sapiens GN=SEMA3A PE=1 SV=1	Q14563	SEMA3A	88890.8	9	11	18	DHIFSFDLVNIK	K	D	0.98	46	29.3	15.9	46	0	0	2	0	2	1447.76	9415.58	15117700	75	86
Mudpit_Aged L3 4 Anterior NP IAF	Semaphorin-3A OS=Homo sapiens GN=SEMA3A PE=1 SV=1	Q14563	SEMA3A	88890.8	9	11	18	DLPDDVITFAR	K	S	0.997	42.2	27.9	15.6	42.2	0	1	0	0	2	1261.64	8284.46	25708200	394	404
Mudpit_Aged L3 4 Anterior NP IAF	Semaphorin-3A OS=Homo sapiens GN=SEMA3A PE=1 SV=1	Q14563	SEMA3A	88890.8	9	11	18	EPTAISAMELSTK	R	Q	0.997	69.3	26.7	17.3	69.3	0	7	0	0	2	1377.69	4262.15	65384400	485	497
Mudpit_Aged L3 4 Anterior NP IAF	Semaphorin-3A OS=Homo sapiens GN=SEMA3A PE=1 SV=1	Q14563	SEMA3A	88890.8	9	11	18	FISAHLISESDNPEDDK	K	V	0.997	94.6	25	18.9	94.6	0	2	1	0	2	1916.89	6508.12	12326100	226	242
Mudpit_Aged L3 4 Anterior NP IAF	Semaphorin-3A OS=Homo sapiens GN=SEMA3A PE=1 SV=1	Q14563	SEMA3A	88890.8	9	11	18	NPVVYGVFTTSSNIFK	K	G	0.997	78.4	27.2	17.9	78.4	0	1	0	0	2	1772.92	9047.84	11612500	321	336
Mudpit_Aged L3 4 Anterior NP IAF	Semaphorin-3A OS=Homo sapiens GN=SEMA3A PE=1 SV=1	Q14563	SEMA3A	88890.8	9	11	18	QQQLYIGSTAGVAQLPLHR	K	C	0.958	32.4	25	15	32.4	0	0	1	0	2	2080.13	8887.56	9397720	498	516
Mudpit_Aged L3 4 Anterior NP IAF	Semaphorin-3A OS=Homo sapiens GN=SEMA3A PE=1 SV=1	Q14563	SEMA3A	88890.8	9	11	18	TDQGLLLR	R	S	0.99	43.9	29.6	19.4	40.3	0	1	0	0	2	915.526	4480.96	18896700	630	637
Mudpit_Aged L3 4 Anterior NP IAF	Semaphorin-3A OS=Homo sapiens GN=SEMA3A PE=1 SV=1	Q14563	SEMA3A	88890.8	9	11	18	VDAEDGQYDVMFIGTDVGTVLK	R	V	0.997	99.6	26.8	19.2	99.6	0	1	0	0	2	2372.13	9191.79	5963220	439	460
Mudpit_Aged L3 4 Anterior NP IAF	Inter-alpha (Globulin) inhibitor H2 OS=Homo sapiens GN=ITIH2 PE=2 SV=1	A2RTY6,D3DRR6,P19823	ITIH2	106466	18	31	158	AEDHFSVIDFNQNIR	R	T	0.997	76.8	26.1	17.8	76.8	0	5	7	0	2	1804.86	7807.19	563678000	342	356
Mudpit_Aged L3 4 Anterior NP IAF	Inter-alpha (Globulin) inhibitor H2 OS=Homo sapiens GN=ITIH2 PE=2 SV=1	A2RTY6,D3DRR6,P19823	ITIH2	106466	18	31	158	AHVSFKPTVAQQR	K	I	0.996	59.2	25	16.7	59.2	0	0	2	1	2	1468.8	5355.58	68122400	247	259
Mudpit_Aged L3 4 Anterior NP IAF	Inter-alpha (Globulin) inhibitor H2 OS=Homo sapiens GN=ITIH2 PE=2 SV=1	A2RTY6,D3DRR6,P19823	ITIH2	106466	18	31	158	ETAVDGELVVLYDVK	R	R	0.997	86.6	30.9	18.4	86.6	0	19	1	0	2	1649.86	9105.14	368625000	266	280
Mudpit_Aged L3 4 Anterior NP IAF	Inter-alpha (Globulin) inhibitor H2 OS=Homo sapiens GN=ITIH2 PE=2 SV=1	A2RTY6,D3DRR6,P19823	ITIH2	106466	18	31	158	FLHVPDTFEGHFDGVPVISK	R	G	0.997	66.4	26.6	17.1	66.4	0	3	19	4	2	2241.13	9913.2	263895000	223	242
Mudpit_Aged L3 4 Anterior NP IAF	Inter-alpha (Globulin) inhibitor H2 OS=Homo sapiens GN=ITIH2 PE=2 SV=1	A2RTY6,D3DRR6,P19823	ITIH2	106466	18	31	158	FYNQVSTPLLR	K	N	0.997	42.5	26.5	15.7	42.5	0	5	0	0	2	1337.72	7038.23	102851000	489	499
Mudpit_Aged L3 4 Anterior NP IAF	Inter-alpha (Globulin) inhibitor H2 OS=Homo sapiens GN=ITIH2 PE=2 SV=1	A2RTY6,D3DRR6,P19823	ITIH2	106466	18	31	158	IQPSGGTNINEALLR	K	A	0.997	111	26.2	20.6	110	0	14	2	0	2	1582.85	6339.34	760473000	380	394
Mudpit_Aged L3 4 Anterior NP IAF	Inter-alpha (Globulin) inhibitor H2 OS=Homo sapiens GN=ITIH2 PE=2 SV=1	A2RTY6,D3DRR6,P19823	ITIH2	106466	18	31	158	IYGNQDTSSQLK	R	K	0.997	76.3	26.5	21.2	72.9	0	7	0	0	2	1353.66	2653.3	52730200	476	487
Mudpit_Aged L3 4 Anterior NP IAF	Inter-alpha (Globulin) inhibitor H2 OS=Homo sapiens GN=ITIH2 PE=2 SV=1	A2RTY6,D3DRR6,P19823	ITIH2	106466	18	31	158	LWAYLTINQLLAER	K	S	0.997	85.7	25	18.4	85.7	0	1	0	0	2	1703.95	9402.29	10135400	583	596
Mudpit_Aged L3 4 Anterior NP IAF	Inter-alpha (Globulin) inhibitor H2 OS=Homo sapiens GN=ITIH2 PE=2 SV=1	A2RTY6,D3DRR6,P19823	ITIH2	106466	18	31	158	MATTMIQSK	R	V	0.997	64.9	25.8	17.1	64.9	0	4	0	0	2	1010.5	2204.99	13561000	85	93
Mudpit_Aged L3 4 Anterior NP IAF	Inter-alpha (Globulin) inhibitor H2 OS=Homo sapiens GN=ITIH2 PE=2 SV=1	A2RTY6,D3DRR6,P19823	ITIH2	106466	18	31	158	NDLISATK	R	T	0.99	42.5	27.1	43.3	14.9	0	1	0	0	2	861.468	2730.01	2547940	360	367
Mudpit_Aged L3 4 Anterior NP IAF	Inter-alpha (Globulin) inhibitor H2 OS=Homo sapiens GN=ITIH2 PE=2 SV=1	A2RTY6,D3DRR6,P19823	ITIH2	106466	18	31	158	NVQFNYPHTSVTDVTQNNFHNYFGGSEIVVAGK	R	F	0.978	44.1	25	15.8	44.1	0	0	1	0	2	3683.75	9338.14	9339320	500	532
Mudpit_Aged L3 4 Anterior NP IAF	Inter-alpha (Globulin) inhibitor H2 OS=Homo sapiens GN=ITIH2 PE=2 SV=1	A2RTY6,D3DRR6,P19823	ITIH2	106466	18	31	158	SILQMSLDHHIVTPLTSLVIENEAGDER	R	M	0.995	88.7	25.3	18.5	88.7	0	0	1	0	2	3117.59	10499.4	1444360	611	638
Mudpit_Aged L3 4 Anterior NP IAF	Inter-alpha (Globulin) inhibitor H2 OS=Homo sapiens GN=ITIH2 PE=2 SV=1	A2RTY6,D3DRR6,P19823	ITIH2	106466	18	31	158	SLAPTAAAK	R	R	0.968	29.7	27.1	21.1	23.4	0	1	0	0	2	829.478	2014.19	1448110	597	605
Mudpit_Aged L3 4 Anterior NP IAF	Inter-alpha (Globulin) inhibitor H2 OS=Homo sapiens GN=ITIH2 PE=2 SV=1	A2RTY6,D3DRR6,P19823	ITIH2	106466	18	31	158	SLPGESEEMMEEVDQVTLYSYK	R	V	0.997	82.8	25	18.2	82.8	0	5	2	0	2	2564.14	8923.22	50717000	55	76
Mudpit_Aged L3 4 Anterior NP IAF	Inter-alpha (Globulin) inhibitor H2 OS=Homo sapiens GN=ITIH2 PE=2 SV=1	A2RTY6,D3DRR6,P19823	ITIH2	106466	18	31	158	SSALDMENFR	R	T	0.997	68.6	25	17.3	68.6	0	20	0	0	2	1169.53	4094.02	490009000	157	166
Mudpit_Aged L3 4 Anterior NP IAF	Inter-alpha (Globulin) inhibitor H2 OS=Homo sapiens GN=ITIH2 PE=2 SV=1	A2RTY6,D3DRR6,P19823	ITIH2	106466	18	31	158	TEVNVLPGAK	R	V	0.997	58.7	25.1	16.7	58.7	0	6	0	0	2	1027.58	4124.46	198434000	167	176
Mudpit_Aged L3 4 Anterior NP IAF	Inter-alpha (Globulin) inhibitor H2 OS=Homo sapiens GN=ITIH2 PE=2 SV=1	A2RTY6,D3DRR6,P19823	ITIH2	106466	18	31	158	VQFELHYQEVK	K	W	0.997	66.5	26.8	17.5	66.2	0	6	3	0	2	1419.73	6935.01	98033900	177	187
Mudpit_Aged L3 4 Anterior NP IAF	Inter-alpha (Globulin) inhibitor H2 OS=Homo sapiens GN=ITIH2 PE=2 SV=1	A2RTY6,D3DRR6,P19823	ITIH2	106466	18	31	158	VVNNSPQPQNVVFDVQIPK	K	G	0.997	97.4	26.6	19.1	97.4	0	10	8	0	2	2122.13	8377.01	432285000	94	112
Mudpit_Aged L3 4 Anterior NP IAF	Fructose-bisphosphate aldolase A OS=Homo sapiens GN=ALDOA PE=1 SV=2	P04075,V9HWN7	ALDOA,HEL-S-87p	39420.6	4	4	6	GILAADESTGSIAK	K	R	0.997	77	27.9	17.8	77	0	2	0	0	2	1332.7	4696.07	16414800	29	42
Mudpit_Aged L3 4 Anterior NP IAF	Fructose-bisphosphate aldolase A OS=Homo sapiens GN=ALDOA PE=1 SV=2	P04075,V9HWN7	ALDOA,HEL-S-87p	39420.6	4	4	6	IGEHTPSALAIMENANVLAR	K	Y	0.991	46	28.3	15.9	46	0	0	1	0	2	2107.1	9473.31	7888410	154	173
Mudpit_Aged L3 4 Anterior NP IAF	Fructose-bisphosphate aldolase A OS=Homo sapiens GN=ALDOA PE=1 SV=2	P04075,V9HWN7	ALDOA,HEL-S-87p	39420.6	4	4	6	LQSIGTENTEENR	R	R	0.997	62.5	25.7	16.9	62.5	0	1	0	0	2	1490.71	2516.65	3989850	44	56
Mudpit_Aged L3 4 Anterior NP IAF	Fructose-bisphosphate aldolase A OS=Homo sapiens GN=ALDOA PE=1 SV=2	P04075,V9HWN7	ALDOA,HEL-S-87p	39420.6	4	4	6	QLLLTADDR	R	V	0.997	50.6	27.7	23.6	43.1	0	2	0	0	2	1044.57	4715.11	17965600	61	69
Mudpit_Aged L3 4 Anterior NP IAF	Vinculin, isoform CRA_c OS=Homo sapiens GN=VCL PE=4 SV=1	A0A024QZN4,P18206,V9HWK2	HEL114,VCL	123801	2	2	2	AVAGNISDPGLQK	K	S	0.993	32.2	25.6	15	32.2	0	1	0	0	2	1269.68	3426.66	5045050	803	815
Mudpit_Aged L3 4 Anterior NP IAF	Vinculin, isoform CRA_c OS=Homo sapiens GN=VCL PE=4 SV=1	A0A024QZN4,P18206,V9HWK2	HEL114,VCL	123801	2	2	2	SLLDASEEAIK	K	K	0.989	39.7	26.9	15.5	39.7	0	1	0	0	2	1175.62	6213.22	6003270	721	731
Mudpit_Aged L3 4 Anterior NP IAF	Triosephosphate isomerase (Fragment) OS=Homo sapiens PE=2 SV=1	Q53HE2,V9HWK1	HEL-S-49	26712.1	4	4	5	IAVAAQNCYK	K	V	0.964	28.7	26.2	14.8	28.7	0	1	0	0	2	1138.56	2905.1	1821320	60	69
Mudpit_Aged L3 4 Anterior NP IAF	Triosephosphate isomerase (Fragment) OS=Homo sapiens PE=2 SV=1	Q53HE2,V9HWK1	HEL-S-49	26712.1	4	4	5	QSLGELIGTLNAAK	K	V	0.997	93.2	26.5	20	92	0	2	0	0	2	1414.79	8716.53	22867000	20	33
Mudpit_Aged L3 4 Anterior NP IAF	Triosephosphate isomerase (Fragment) OS=Homo sapiens PE=2 SV=1	Q53HE2,V9HWK1	HEL-S-49	26712.1	4	4	5	SNVSDAVAQSTR	K	I	0.995	62.1	25	16.9	62.1	0	0	1	0	2	1234.6	2395.59	3471080	195	206
Mudpit_Aged L3 4 Anterior NP IAF	Triosephosphate isomerase (Fragment) OS=Homo sapiens PE=2 SV=1	Q53HE2,V9HWK1	HEL-S-49	26712.1	4	4	5	VVLAYEPVWAIGTGK	K	T	0.995	34	25.9	15.1	34	0	1	0	0	2	1602.89	9099.73	31613000	161	175
Mudpit_Aged L3 4 Anterior NP IAF	Hyaluronan-binding protein 2 OS=Homo sapiens GN=HABP2 PE=1 SV=1	Q14520	HABP2	62671.4	3	3	3	DEIPHNDIALLK	R	L	0.966	34.9	26.8	15.2	34.9	0	0	1	0	2	1377.74	6998.28	5890020	405	416
Mudpit_Aged L3 4 Anterior NP IAF	Hyaluronan-binding protein 2 OS=Homo sapiens GN=HABP2 PE=1 SV=1	Q14520	HABP2	62671.4	3	3	3	LIANTLCNSR	K	Q	0.997	41.4	26.7	15.6	41.4	0	1	0	0	2	1162.59	3742.57	4569650	471	480
Mudpit_Aged L3 4 Anterior NP IAF	Hyaluronan-binding protein 2 OS=Homo sapiens GN=HABP2 PE=1 SV=1	Q14520	HABP2	62671.4	3	3	3	VVLGDQDLK	K	K	0.99	36.3	27.9	15.3	36.3	0	1	0	0	2	986.552	4091.62	5597390	373	381
Mudpit_Aged L3 4 Anterior NP IAF	Sulfhydryl oxidase 1 OS=Homo sapiens GN=QSOX1 PE=1 SV=3	O00391	QSOX1	82578.7	12	17	52	AHFSPSNIILDFPAAGSAAR	K	R	0.982	39.9	26.9	15.5	39.9	0	0	3	0	2	2042.05	9454.54	47773200	533	552
Mudpit_Aged L3 4 Anterior NP IAF	Sulfhydryl oxidase 1 OS=Homo sapiens GN=QSOX1 PE=1 SV=3	O00391	QSOX1	82578.7	12	17	52	DFNIPGFPTVR	R	F	0.991	34.4	27.7	15.1	34.4	0	2	0	0	2	1262.65	9102.58	41723800	112	122
Mudpit_Aged L3 4 Anterior NP IAF	Sulfhydryl oxidase 1 OS=Homo sapiens GN=QSOX1 PE=1 SV=3	O00391	QSOX1	82578.7	12	17	52	DVQNVAAAPELAMGALELESR	R	N	0.997	103	26.6	19.4	103	0	4	2	0	2	2200.09	8615.76	38983700	554	574
Mudpit_Aged L3 4 Anterior NP IAF	Sulfhydryl oxidase 1 OS=Homo sapiens GN=QSOX1 PE=1 SV=3	O00391	QSOX1	82578.7	12	17	52	EVALDLSQHK	R	G	0.997	51.5	25.8	19.4	48.3	0	1	3	0	2	1139.61	4418.82	49416400	202	211
Mudpit_Aged L3 4 Anterior NP IAF	Sulfhydryl oxidase 1 OS=Homo sapiens GN=QSOX1 PE=1 SV=3	O00391	QSOX1	82578.7	12	17	52	IYMADLESALHYILR	K	I	0.991	53.2	26.5	16.3	53.2	0	0	11	0	2	1823.94	9976.27	8611870	299	313
Mudpit_Aged L3 4 Anterior NP IAF	Sulfhydryl oxidase 1 OS=Homo sapiens GN=QSOX1 PE=1 SV=3	O00391	QSOX1	82578.7	12	17	52	LAGAPSEDPQFPK	R	V	0.997	52.1	25.9	16.3	52.1	0	3	0	0	2	1356.68	4918.85	24467400	488	500
Mudpit_Aged L3 4 Anterior NP IAF	Sulfhydryl oxidase 1 OS=Homo sapiens GN=QSOX1 PE=1 SV=3	O00391	QSOX1	82578.7	12	17	52	LEEIDGFFAR	K	N	0.997	61.8	25	16.9	61.8	0	7	0	0	2	1196.59	7604.23	152866000	173	182
Mudpit_Aged L3 4 Anterior NP IAF	Sulfhydryl oxidase 1 OS=Homo sapiens GN=QSOX1 PE=1 SV=3	O00391	QSOX1	82578.7	12	17	52	NNEEYLALIFEK	R	G	0.997	55.5	26.2	16.5	55.5	0	2	0	0	2	1482.75	9218.38	40311200	183	194
Mudpit_Aged L3 4 Anterior NP IAF	Sulfhydryl oxidase 1 OS=Homo sapiens GN=QSOX1 PE=1 SV=3	O00391	QSOX1	82578.7	12	17	52	SALYSPSDPLTLLQADTVR	R	G	0.997	145	26.4	22.1	145	0	2	1	0	2	2047.07	9223.09	54931100	33	51
Mudpit_Aged L3 4 Anterior NP IAF	Sulfhydryl oxidase 1 OS=Homo sapiens GN=QSOX1 PE=1 SV=3	O00391	QSOX1	82578.7	12	17	52	SFYTAYLQR	R	L	0.992	33.9	26.9	15.1	33.9	0	1	0	0	2	1148.57	7118.55	3726010	257	265
Mudpit_Aged L3 4 Anterior NP IAF	Sulfhydryl oxidase 1 OS=Homo sapiens GN=QSOX1 PE=1 SV=3	O00391	QSOX1	82578.7	12	17	52	VLNTEANVVR	R	K	0.997	74.6	28	30	62.3	0	2	0	0	2	1114.62	3269.94	24953700	218	227
Mudpit_Aged L3 4 Anterior NP IAF	Sulfhydryl oxidase 1 OS=Homo sapiens GN=QSOX1 PE=1 SV=3	O00391	QSOX1	82578.7	12	17	52	VPVLMESR	R	S	0.99	55.3	27.5	18.4	53.4	0	8	0	0	2	946.503	3362.63	86368200	249	256
Mudpit_Aged L3 4 Anterior NP IAF	cDNA FLJ61290, highly similar to Neutral alpha-glucosidase AB OS=Homo sapiens PE=2 SV=1	B4DJ30,Q14697,V9HWJ0	GANAB,HEL-S-164nA	106876	6	8	8	DENSVELTMAEGPYK	R	I	0.997	73.8	25	17.6	73.8	0	2	0	0	2	1682.76	5806.35	5900930	134	148
Mudpit_Aged L3 4 Anterior NP IAF	cDNA FLJ61290, highly similar to Neutral alpha-glucosidase AB OS=Homo sapiens PE=2 SV=1	B4DJ30,Q14697,V9HWJ0	GANAB,HEL-S-164nA	106876	6	8	8	DEPGAWEETFK	K	T	0.997	40.2	25	15.5	40.2	0	1	0	0	2	1308.57	6431.47	12427400	221	231
Mudpit_Aged L3 4 Anterior NP IAF	cDNA FLJ61290, highly similar to Neutral alpha-glucosidase AB OS=Homo sapiens PE=2 SV=1	B4DJ30,Q14697,V9HWJ0	GANAB,HEL-S-164nA	106876	6	8	8	LSFQHDPETSVLVLR	R	K	0.997	75.8	26.7	17.7	75.8	0	0	1	0	2	1740.93	9312.55	3930590	915	929
Mudpit_Aged L3 4 Anterior NP IAF	cDNA FLJ61290, highly similar to Neutral alpha-glucosidase AB OS=Homo sapiens PE=2 SV=1	B4DJ30,Q14697,V9HWJ0	GANAB,HEL-S-164nA	106876	6	8	8	MMDYLQGSGETPQTDVR	K	W	0.997	70.6	25	17.4	0	0	2	0	0	2	1943.85	5460.03	6150780	338	354
Mudpit_Aged L3 4 Anterior NP IAF	cDNA FLJ61290, highly similar to Neutral alpha-glucosidase AB OS=Homo sapiens PE=2 SV=1	B4DJ30,Q14697,V9HWJ0	GANAB,HEL-S-164nA	106876	6	8	8	NPEPELLVR	K	W	0.997	47.2	25	16	47.2	0	1	0	0	2	1066.59	5532.92	6993710	654	662
Mudpit_Aged L3 4 Anterior NP IAF	cDNA FLJ61290, highly similar to Neutral alpha-glucosidase AB OS=Homo sapiens PE=2 SV=1	B4DJ30,Q14697,V9HWJ0	GANAB,HEL-S-164nA	106876	6	8	8	YFTWDPSR	R	F	0.972	31.8	25	15	31.8	0	1	0	0	2	1071.49	6459.93	8799290	438	445
Mudpit_Aged L3 4 Anterior NP IAF	Chondroadherin OS=Homo sapiens GN=CHAD PE=2 SV=2	O15335	CHAD	40477.7	10	15	127	AGAFDDLTELTYLYLDHNK	R	V	0.997	156	25.4	22.7	156	0	32	44	0	2	2199.06	10100.4	353821000	116	134
Mudpit_Aged L3 4 Anterior NP IAF	Chondroadherin OS=Homo sapiens GN=CHAD PE=2 SV=2	O15335	CHAD	40477.7	10	15	127	AGAFQGAK	R	D	0.99	40.7	25	15.5	40.7	0	2	0	0	2	749.394	1835.84	600566	164	171
Mudpit_Aged L3 4 Anterior NP IAF	Chondroadherin OS=Homo sapiens GN=CHAD PE=2 SV=2	O15335	CHAD	40477.7	10	15	127	FSDGAFLGVTTLK	K	H	0.997	86.3	26	18.4	86.3	0	14	0	0	2	1355.72	8509.03	366886000	259	271
Mudpit_Aged L3 4 Anterior NP IAF	Chondroadherin OS=Homo sapiens GN=CHAD PE=2 SV=2	O15335	CHAD	40477.7	10	15	127	LNQLPSNFPFDSLETLALTNNPWK	R	C	0.997	89.7	26	18.6	89.7	0	1	2	0	2	2759.4	9460.51	76587900	280	303
Mudpit_Aged L3 4 Anterior NP IAF	Chondroadherin OS=Homo sapiens GN=CHAD PE=2 SV=2	O15335	CHAD	40477.7	10	15	127	NNFPVLAANSFR	R	A	0.997	46.8	27.6	15.9	46.8	0	3	0	0	2	1349.7	7725.25	33366300	61	72
Mudpit_Aged L3 4 Anterior NP IAF	Chondroadherin OS=Homo sapiens GN=CHAD PE=2 SV=2	O15335	CHAD	40477.7	10	15	127	NQLSSYPSAALSK	R	L	0.997	53.3	26.9	16.3	53.3	0	7	0	0	2	1365.7	4612.18	53581600	205	217
Mudpit_Aged L3 4 Anterior NP IAF	Chondroadherin OS=Homo sapiens GN=CHAD PE=2 SV=2	O15335	CHAD	40477.7	10	15	127	QLIYLYLSHNDIR	K	V	0.997	80.2	25.7	18	80.2	0	1	1	0	2	1647.89	9085.55	26602500	100	112
Mudpit_Aged L3 4 Anterior NP IAF	Chondroadherin OS=Homo sapiens GN=CHAD PE=2 SV=2	O15335	CHAD	40477.7	10	15	127	SIPDNAFQSFGR	K	Y	0.997	50.3	30.4	16.1	50.3	0	7	0	0	2	1338.64	6950.87	258229000	233	244
Mudpit_Aged L3 4 Anterior NP IAF	Chondroadherin OS=Homo sapiens GN=CHAD PE=2 SV=2	O15335	CHAD	40477.7	10	15	127	WLYLSENALSSLQPGALDDVENLAK	R	F	0.997	102	26.9	19.4	102	0	6	1	0	2	2746.39	9363.93	90142700	175	199
Mudpit_Aged L3 4 Anterior NP IAF	Chondroadherin OS=Homo sapiens GN=CHAD PE=2 SV=2	O15335	CHAD	40477.7	10	15	127	YLETLWLDNTNLEK	R	F	0.997	76.7	27.3	17.8	76.7	0	5	1	0	2	1751.89	9059.33	264608000	245	258
Mudpit_Aged L3 4 Anterior NP IAF	Cathepsin D OS=Homo sapiens GN=CTSD PE=1 SV=1	A0A1B0GV23_HUMAN,A0A1B0GVD5_HUMAN,A0A1B0GW44_HUMAN,A0A1B0GWE8_HUMAN,P07339,V9HWI3	CTSD,HEL-S-130P	44553	5	6	7	DPDAQPGGELMLGGTDSK	R	Y	0.997	73.1	25	17.6	73.1	0	2	0	0	2	1787.81	5901.46	8609110	236	253
Mudpit_Aged L3 4 Anterior NP IAF	Cathepsin D OS=Homo sapiens GN=CTSD PE=1 SV=1	A0A1B0GV23_HUMAN,A0A1B0GVD5_HUMAN,A0A1B0GW44_HUMAN,A0A1B0GWE8_HUMAN,P07339,V9HWI3	CTSD,HEL-S-130P	44553	5	6	7	EGCEAIVDTGTSLMVGPVDEVR	K	E	0.997	140	29	21.7	140	0	1	0	0	2	2335.08	8919.75	6109870	288	309
Mudpit_Aged L3 4 Anterior NP IAF	Cathepsin D OS=Homo sapiens GN=CTSD PE=1 SV=1	A0A1B0GV23_HUMAN,A0A1B0GVD5_HUMAN,A0A1B0GW44_HUMAN,A0A1B0GWE8_HUMAN,P07339,V9HWI3	CTSD,HEL-S-130P	44553	5	6	7	FDGILGMAYPR	K	I	0.997	67.5	25.6	19.9	64.8	0	2	0	0	2	1239.62	8068.53	27061500	195	205
Mudpit_Aged L3 4 Anterior NP IAF	Cathepsin D OS=Homo sapiens GN=CTSD PE=1 SV=1	A0A1B0GV23_HUMAN,A0A1B0GVD5_HUMAN,A0A1B0GW44_HUMAN,A0A1B0GWE8_HUMAN,P07339,V9HWI3	CTSD,HEL-S-130P	44553	5	6	7	LSPEDYTLK	K	V	0.997	47.3	26.8	28.1	35.1	0	1	0	0	2	1065.55	4998.69	31870000	349	357
Mudpit_Aged L3 4 Anterior NP IAF	Cathepsin D OS=Homo sapiens GN=CTSD PE=1 SV=1	A0A1B0GV23_HUMAN,A0A1B0GVD5_HUMAN,A0A1B0GW44_HUMAN,A0A1B0GWE8_HUMAN,P07339,V9HWI3	CTSD,HEL-S-130P	44553	5	6	7	LVDQNIFSFYLSR	K	D	0.997	86.4	27.2	18.4	86.4	0	1	0	0	2	1601.83	9213.65	12629500	223	235
Mudpit_Aged L3 4 Anterior NP IAF	Flavin reductase (NADPH) OS=Homo sapiens GN=BLVRB PE=1 SV=3	P30043,V9HWI1	BLVRB,HEL-S-10	22118.7	2	2	2	NDLSPTTVMSEGAR	R	N	0.997	49.6	25	16.1	49.6	0	1	0	0	2	1477.7	5245.16	4169810	79	92
Mudpit_Aged L3 4 Anterior NP IAF	Flavin reductase (NADPH) OS=Homo sapiens GN=BLVRB PE=1 SV=3	P30043,V9HWI1	BLVRB,HEL-S-10	22118.7	2	2	2	TVAGQDAVIVLLGTR	K	N	0.997	96.5	25	19	96.5	0	1	0	0	2	1512.87	9096.06	14803700	64	78
Mudpit_Aged L3 4 Anterior NP IAF	Transforming growth factor, beta 1 (Camurati-Engelmann disease), isoform CRA_a OS=Homo sapiens GN=TGFB1 PE=3 SV=1	A0A024R0P8,P01137	TGFB1	44342.3	2	2	3	EAVPEPVLLSR	R	A	0.973	28.3	25	14.8	28.3	0	1	0	0	2	1209.68	6287.36	7141870	142	152
Mudpit_Aged L3 4 Anterior NP IAF	Transforming growth factor, beta 1 (Camurati-Engelmann disease), isoform CRA_a OS=Homo sapiens GN=TGFB1 PE=3 SV=1	A0A024R0P8,P01137	TGFB1	44342.3	2	2	3	VAGESAEPEPEPEADYYAK	R	E	0.997	71.2	25	17.5	71.2	0	2	0	0	2	2051.91	5091.93	6847480	88	106
Mudpit_Aged L3 4 Anterior NP IAF	Proteoglycan 4 OS=Homo sapiens GN=PRG4 PE=1 SV=1	A0A0U1RR20	PRG4	146455	13	24	191	AIGPSQTHTIR	R	I	0.997	83.1	25.9	24.7	76.6	0	3	12	0	2	1180.64	4040.24	124383000	1264	1274
Mudpit_Aged L3 4 Anterior NP IAF	Proteoglycan 4 OS=Homo sapiens GN=PRG4 PE=1 SV=1	A0A0U1RR20	PRG4	146455	13	24	191	DAGYPKPIFK	K	G	0.997	49.4	26.7	16.1	49.4	0	6	5	0	2	1135.61	6220.51	147986000	1182	1191
Mudpit_Aged L3 4 Anterior NP IAF	Proteoglycan 4 OS=Homo sapiens GN=PRG4 PE=1 SV=1	A0A0U1RR20	PRG4	146455	13	24	191	DQYYNIDVPSR	K	T	0.997	63.2	25	16.9	63.2	0	17	2	0	2	1369.64	5864.92	2037920000	1330	1340
Mudpit_Aged L3 4 Anterior NP IAF	Proteoglycan 4 OS=Homo sapiens GN=PRG4 PE=1 SV=1	A0A0U1RR20	PRG4	146455	13	24	191	GFGGLTGQIVAALSTAK	K	Y	0.997	71.7	25	17.5	71.7	0	2	1	0	2	1590.89	9235.41	53395000	1192	1208
Mudpit_Aged L3 4 Anterior NP IAF	Proteoglycan 4 OS=Homo sapiens GN=PRG4 PE=1 SV=1	A0A0U1RR20	PRG4	146455	13	24	191	GGSIQQYIYK	R	Q	0.997	62.3	26.1	21.2	58	0	6	0	0	2	1156.6	5749.46	287118000	1222	1231
Mudpit_Aged L3 4 Anterior NP IAF	Proteoglycan 4 OS=Homo sapiens GN=PRG4 PE=1 SV=1	A0A0U1RR20	PRG4	146455	13	24	191	GHYFWMLSPFSPPSPAR	R	R	0.997	93.3	25.8	18.8	93.3	0	21	22	0	2	1976.95	9941.39	331387000	1124	1140
Mudpit_Aged L3 4 Anterior NP IAF	Proteoglycan 4 OS=Homo sapiens GN=PRG4 PE=1 SV=1	A0A0U1RR20	PRG4	146455	13	24	191	GLPNVVTSAISLPNIR	R	K	0.997	104	25	19.5	104	0	3	4	0	2	1650.95	9049.86	2078720000	1302	1317
Mudpit_Aged L3 4 Anterior NP IAF	Proteoglycan 4 OS=Homo sapiens GN=PRG4 PE=1 SV=1	A0A0U1RR20	PRG4	146455	13	24	191	GVLHNEVK	K	V	0.979	31.5	26.6	15	31.5	0	1	0	0	2	895.5	3207.41	3807720	1288	1295
Mudpit_Aged L3 4 Anterior NP IAF	Proteoglycan 4 OS=Homo sapiens GN=PRG4 PE=1 SV=1	A0A0U1RR20	PRG4	146455	13	24	191	ITEVWGIPSPIDTVFTR	R	C	0.997	78.1	25.4	20.5	75.4	0	6	5	0	2	1931.03	9307.22	916011000	1142	1158
Mudpit_Aged L3 4 Anterior NP IAF	Proteoglycan 4 OS=Homo sapiens GN=PRG4 PE=1 SV=1	A0A0U1RR20	PRG4	146455	13	24	191	KPDGYDYYAFSK	R	D	0.997	83.7	25	18.2	83.7	0	34	32	0	2	1453.66	6271.45	1495610000	1318	1329
Mudpit_Aged L3 4 Anterior NP IAF	Proteoglycan 4 OS=Homo sapiens GN=PRG4 PE=1 SV=1	A0A0U1RR20	PRG4	146455	13	24	191	NWPESVYFFK	K	R	0.99	30.6	25.5	14.9	30.6	0	1	0	0	2	1316.63	9143.63	751477000	1211	1220
Mudpit_Aged L3 4 Anterior NP IAF	Proteoglycan 4 OS=Homo sapiens GN=PRG4 PE=1 SV=1	A0A0U1RR20	PRG4	146455	13	24	191	RPALNYPVYGETTQVR	R	R	0.997	60.7	26.9	16.8	60.7	0	2	0	0	2	1863.97	6263	18130200	1242	1257
Mudpit_Aged L3 4 Anterior NP IAF	Proteoglycan 4 OS=Homo sapiens GN=PRG4 PE=1 SV=1	A0A0U1RR20	PRG4	146455	13	24	191	VPNQGIIINPMLSDETNICNGKPVDGLTTLR	R	N	0.994	64.8	25.6	17.1	64.8	0	0	6	0	2	3380.72	9199.61	132604000	1085	1115
Mudpit_Aged L3 4 Anterior NP IAF	Dermatan sulfate proteoglycan 3, isoform CRA_a OS=Homo sapiens GN=DSPG3 PE=4 SV=1	A0A024RBC3,Q99645	DSPG3,EPYC	36638.6	3	3	4	IDLTSNLISEIDEDAFR	R	K	0.997	115	26.8	20.2	115	0	1	0	0	2	1950.97	9303.32	24241700	172	188
Mudpit_Aged L3 4 Anterior NP IAF	Dermatan sulfate proteoglycan 3, isoform CRA_a OS=Homo sapiens GN=DSPG3 PE=4 SV=1	A0A024RBC3,Q99645	DSPG3,EPYC	36638.6	3	3	4	LDGNPINLSK	R	T	0.997	51.2	25	16.2	51.2	0	2	0	0	2	1070.58	4427.67	16403800	296	305
Mudpit_Aged L3 4 Anterior NP IAF	Dermatan sulfate proteoglycan 3, isoform CRA_a OS=Homo sapiens GN=DSPG3 PE=4 SV=1	A0A024RBC3,Q99645	DSPG3,EPYC	36638.6	3	3	4	QLPELPTTLTFIDISNNR	R	L	0.997	100	26.5	19.3	100	0	1	0	0	2	2072.1	9274.57	11311400	205	222
Mudpit_Aged L3 4 Anterior NP IAF	Alanyl (Membrane) aminopeptidase (Aminopeptidase N, aminopeptidase M, microsomal aminopeptidase, CD13, p150), isoform CRA_a OS=Homo sapiens GN=ANPEP PE=4 SV=1	A0A024RC61,P15144,Q59E93	ANPEP	109542	2	3	3	VVATTQMQAADAR	K	K	0.997	86.3	26	18.4	86.3	0	2	0	0	2	1377.68	2287.53	1080320	206	218
Mudpit_Aged L3 4 Anterior NP IAF	Alanyl (Membrane) aminopeptidase (Aminopeptidase N, aminopeptidase M, microsomal aminopeptidase, CD13, p150), isoform CRA_a OS=Homo sapiens GN=ANPEP PE=4 SV=1	A0A024RC61,P15144,Q59E93	ANPEP	109542	2	3	3	YLSYTLNPDLIR	R	K	0.997	60.8	25.6	16.8	60.8	0	1	0	0	2	1467.78	8901.99	6128960	844	855
Mudpit_Aged L3 4 Anterior NP IAF	Alpha-1-acid glycoprotein 1 OS=Homo sapiens GN=ORM1 PE=1 SV=1	P02763,V9HWF6	HEL-S-153w,ORM1	23512.1	7	11	102	EQLGEFYEALDCLR	K	I	0.997	54.7	25	16.4	54.7	0	1	0	0	2	1743.79	9225.38	12151800	154	167
Mudpit_Aged L3 4 Anterior NP IAF	Alpha-1-acid glycoprotein 1 OS=Homo sapiens GN=ORM1 PE=1 SV=1	P02763,V9HWF6	HEL-S-153w,ORM1	23512.1	7	11	102	NWGLSVYADKPETTK	K	E	0.997	61.3	31.7	16.8	61.3	0	5	4	0	2	1708.85	6969.49	211784000	139	153
Mudpit_Aged L3 4 Anterior NP IAF	Alpha-1-acid glycoprotein 1 OS=Homo sapiens GN=ORM1 PE=1 SV=1	P02763,V9HWF6	HEL-S-153w,ORM1	23512.1	7	11	102	SDVVYTDWK	K	K	0.997	75.5	25	17.7	75.5	0	7	0	0	2	1112.53	5409.68	186812000	171	179
Mudpit_Aged L3 4 Anterior NP IAF	Alpha-1-acid glycoprotein 1 OS=Homo sapiens GN=ORM1 PE=1 SV=1	P02763,V9HWF6	HEL-S-153w,ORM1	23512.1	7	11	102	TEDTIFLR	K	E	0.99	61.3	26.6	18.7	59.4	0	13	0	0	2	994.52	5864.84	1413640000	74	81
Mudpit_Aged L3 4 Anterior NP IAF	Alpha-1-acid glycoprotein 1 OS=Homo sapiens GN=ORM1 PE=1 SV=1	P02763,V9HWF6	HEL-S-153w,ORM1	23512.1	7	11	102	TYMLAFDVNDEK	K	N	0.997	67.8	25	17.2	67.8	0	22	0	0	2	1445.66	7064.91	886147000	127	138
Mudpit_Aged L3 4 Anterior NP IAF	Alpha-1-acid glycoprotein 1 OS=Homo sapiens GN=ORM1 PE=1 SV=1	P02763,V9HWF6	HEL-S-153w,ORM1	23512.1	7	11	102	WFYIASAFR	K	N	0.995	36.7	27.1	15.3	36.7	0	1	0	0	2	1160.59	9033.02	80264400	43	51
Mudpit_Aged L3 4 Anterior NP IAF	Alpha-1-acid glycoprotein 1 OS=Homo sapiens GN=ORM1 PE=1 SV=1	P02763,V9HWF6	HEL-S-153w,ORM1	23512.1	7	11	102	YVGGQEHFAHLLILR	R	D	0.997	87.4	27.8	18.5	87.4	0	13	14	22	2	1752.95	10153.6	391795000	109	123
Mudpit_Aged L3 4 Anterior NP IAF	Peptidyl-prolyl cis-trans isomerase OS=Homo sapiens PE=2 SV=1	A8K486,B2RE56,P62937,V9HWF5	HEL-S-69p,PPIA	18012.9	3	3	5	EGMNIVEAMER	K	F	0.997	59.5	25	16.7	59.5	0	1	0	0	2	1278.58	7557.02	7939180	134	144
Mudpit_Aged L3 4 Anterior NP IAF	Peptidyl-prolyl cis-trans isomerase OS=Homo sapiens PE=2 SV=1	A8K486,B2RE56,P62937,V9HWF5	HEL-S-69p,PPIA	18012.9	3	3	5	FEDENFILK	K	H	0.997	41.4	29.2	15.6	41.4	0	2	0	0	2	1154.57	6981.77	19910400	83	91
Mudpit_Aged L3 4 Anterior NP IAF	Peptidyl-prolyl cis-trans isomerase OS=Homo sapiens PE=2 SV=1	A8K486,B2RE56,P62937,V9HWF5	HEL-S-69p,PPIA	18012.9	3	3	5	VSFELFADK	R	V	0.997	52.3	25	16.3	52.3	0	2	0	0	2	1055.54	7998.25	9349290	20	28
Mudpit_Aged L3 4 Anterior NP IAF	Phosphoglycerate kinase 1 OS=Homo sapiens GN=PGK1 PE=1 SV=3	P00558,V9HWF4	HEL-S-68p,PGK1	44615.3	7	10	15	ALMDEVVK	K	A	0.972	30.4	26.5	14.9	30.4	0	2	0	0	2	904.481	3803.77	18920000	354	361
Mudpit_Aged L3 4 Anterior NP IAF	Phosphoglycerate kinase 1 OS=Homo sapiens GN=PGK1 PE=1 SV=3	P00558,V9HWF4	HEL-S-68p,PGK1	44615.3	7	10	15	IQLINNMLDK	K	V	0.997	48.4	27	18.6	45.8	0	2	0	0	2	1201.66	6620.77	9832680	221	230
Mudpit_Aged L3 4 Anterior NP IAF	Phosphoglycerate kinase 1 OS=Homo sapiens GN=PGK1 PE=1 SV=3	P00558,V9HWF4	HEL-S-68p,PGK1	44615.3	7	10	15	ITLPVDFVTADK	K	F	0.997	55.9	25.4	16.5	55.9	0	3	0	0	2	1318.73	8913.1	47689400	280	291
Mudpit_Aged L3 4 Anterior NP IAF	Phosphoglycerate kinase 1 OS=Homo sapiens GN=PGK1 PE=1 SV=3	P00558,V9HWF4	HEL-S-68p,PGK1	44615.3	7	10	15	LGDVYVNDAFGTAHR	K	A	0.997	91.8	26.6	18.7	91.8	0	1	2	0	2	1634.79	6304.07	57914000	157	171
Mudpit_Aged L3 4 Anterior NP IAF	Phosphoglycerate kinase 1 OS=Homo sapiens GN=PGK1 PE=1 SV=3	P00558,V9HWF4	HEL-S-68p,PGK1	44615.3	7	10	15	VLNNMEIGTSLFDEEGAK	K	I	0.997	84.5	25.7	18.3	84.5	0	2	0	0	2	1966.94	8625.66	12056600	247	264
Mudpit_Aged L3 4 Anterior NP IAF	Phosphoglycerate kinase 1 OS=Homo sapiens GN=PGK1 PE=1 SV=3	P00558,V9HWF4	HEL-S-68p,PGK1	44615.3	7	10	15	VSHVSTGGGASLELLEGK	K	V	0.996	61.5	27.4	20.9	57.5	0	0	1	0	2	1740.91	6602.19	14640200	389	406
Mudpit_Aged L3 4 Anterior NP IAF	Phosphoglycerate kinase 1 OS=Homo sapiens GN=PGK1 PE=1 SV=3	P00558,V9HWF4	HEL-S-68p,PGK1	44615.3	7	10	15	YSLEPVAVELK	K	S	0.997	42.2	26.5	15.6	42.2	0	2	0	0	2	1247.69	7102.04	26879300	76	86
Mudpit_Aged L3 4 Anterior NP IAF	Glutathione S-transferase P OS=Homo sapiens GN=GSTP1 PE=1 SV=2	P09211,V9HWE9	GSTP1,HEL-S-22	23356.7	3	4	5	EEVVTVETWQEGSLK	K	A	0.995	45.4	29.1	15.8	45.4	0	2	0	0	2	1733.86	7231.74	3858990	31	45
Mudpit_Aged L3 4 Anterior NP IAF	Glutathione S-transferase P OS=Homo sapiens GN=GSTP1 PE=1 SV=2	P09211,V9HWE9	GSTP1,HEL-S-22	23356.7	3	4	5	FQDGDLTLYQSNTILR	K	H	0.997	84.2	28.1	18.3	84.2	0	1	0	0	2	1883.95	8565.28	2548070	56	71
Mudpit_Aged L3 4 Anterior NP IAF	Glutathione S-transferase P OS=Homo sapiens GN=GSTP1 PE=1 SV=2	P09211,V9HWE9	GSTP1,HEL-S-22	23356.7	3	4	5	MLLADQGQSWK	R	E	0.991	32	26.5	15	32	0	2	0	0	2	1292.63	5496.19	8984460	20	30
Mudpit_Aged L3 4 Anterior NP IAF	Inter-alpha-trypsin inhibitor heavy chain H1 OS=Homo sapiens GN=ITIH1 PE=1 SV=3	P19827	ITIH1	101390	15	29	94	AAISGENAGLVR	K	A	0.997	77.7	26.8	27	68.6	0	6	0	0	2	1157.63	3642.03	41824700	126	137
Mudpit_Aged L3 4 Anterior NP IAF	Inter-alpha-trypsin inhibitor heavy chain H1 OS=Homo sapiens GN=ITIH1 PE=1 SV=3	P19827	ITIH1	101390	15	29	94	ADVQAHGEGQEFSITCLVDEEEMK	K	K	0.997	93.1	25	18.8	93.1	0	1	0	0	2	2739.18	9087.82	6452580	525	548
Mudpit_Aged L3 4 Anterior NP IAF	Inter-alpha-trypsin inhibitor heavy chain H1 OS=Homo sapiens GN=ITIH1 PE=1 SV=3	P19827	ITIH1	101390	15	29	94	EVAFDLEIPK	R	T	0.997	41.8	27.2	15.6	41.8	0	4	0	0	2	1160.62	8092.4	42002300	84	93
Mudpit_Aged L3 4 Anterior NP IAF	Inter-alpha-trypsin inhibitor heavy chain H1 OS=Homo sapiens GN=ITIH1 PE=1 SV=3	P19827	ITIH1	101390	15	29	94	FAHYVVTSQVVNTANEAR	R	E	0.997	97.2	26.7	19.1	97.2	0	6	10	0	2	2006.01	7483.44	514343000	66	83
Mudpit_Aged L3 4 Anterior NP IAF	Inter-alpha-trypsin inhibitor heavy chain H1 OS=Homo sapiens GN=ITIH1 PE=1 SV=3	P19827	ITIH1	101390	15	29	94	GFSLDEATNLNGGLLR	R	G	0.997	95.1	27.2	18.9	95.1	0	2	0	0	2	1676.86	8848.77	36869700	361	376
Mudpit_Aged L3 4 Anterior NP IAF	Inter-alpha-trypsin inhibitor heavy chain H1 OS=Homo sapiens GN=ITIH1 PE=1 SV=3	P19827	ITIH1	101390	15	29	94	GMADQDGLKPTIDKPSEDSPPLEMLGPR	R	R	0.997	80	25	18	80	0	0	7	3	2	2994.46	8671.08	85743300	613	640
Mudpit_Aged L3 4 Anterior NP IAF	Inter-alpha-trypsin inhibitor heavy chain H1 OS=Homo sapiens GN=ITIH1 PE=1 SV=3	P19827	ITIH1	101390	15	29	94	GSLVQASEANLQAAQDFVR	K	G	0.997	159	26.7	23	159	0	4	5	0	2	2004.01	8973.03	113704000	342	360
Mudpit_Aged L3 4 Anterior NP IAF	Inter-alpha-trypsin inhibitor heavy chain H1 OS=Homo sapiens GN=ITIH1 PE=1 SV=3	P19827	ITIH1	101390	15	29	94	ILGDMQPGDYFDLVLFGTR	K	V	0.997	123	25.9	20.7	123	0	3	2	0	2	2157.07	9479.4	139347000	318	336
Mudpit_Aged L3 4 Anterior NP IAF	Inter-alpha-trypsin inhibitor heavy chain H1 OS=Homo sapiens GN=ITIH1 PE=1 SV=3	P19827	ITIH1	101390	15	29	94	LDAQASFLPK	K	E	0.997	85.3	27.8	18.3	85.3	0	8	0	0	2	1089.59	5969.79	117869000	205	214
Mudpit_Aged L3 4 Anterior NP IAF	Inter-alpha-trypsin inhibitor heavy chain H1 OS=Homo sapiens GN=ITIH1 PE=1 SV=3	P19827	ITIH1	101390	15	29	94	NHMQYEIVIK	R	V	0.997	61.2	26.5	16.8	61.2	0	6	2	0	2	1290.65	6271.26	75021400	171	180
Mudpit_Aged L3 4 Anterior NP IAF	Inter-alpha-trypsin inhibitor heavy chain H1 OS=Homo sapiens GN=ITIH1 PE=1 SV=3	P19827	ITIH1	101390	15	29	94	QAVDTAVDGVFIR	R	S	0.997	79.4	27.5	18	79.4	0	8	1	0	2	1390.73	6612.7	125301000	42	54
Mudpit_Aged L3 4 Anterior NP IAF	Inter-alpha-trypsin inhibitor heavy chain H1 OS=Homo sapiens GN=ITIH1 PE=1 SV=3	P19827	ITIH1	101390	15	29	94	QYYEGSEIVVAGR	K	I	0.997	64	26.3	17	64	0	5	0	0	2	1470.72	5176.18	122694000	502	514
Mudpit_Aged L3 4 Anterior NP IAF	Inter-alpha-trypsin inhibitor heavy chain H1 OS=Homo sapiens GN=ITIH1 PE=1 SV=3	P19827	ITIH1	101390	15	29	94	TAFISDFAVTADGNAFIGDIK	K	D	0.997	120	26	20.5	120	0	2	0	0	2	2173.08	9249.02	20980600	94	114
Mudpit_Aged L3 4 Anterior NP IAF	Inter-alpha-trypsin inhibitor heavy chain H1 OS=Homo sapiens GN=ITIH1 PE=1 SV=3	P19827	ITIH1	101390	15	29	94	TMEQFTIHLTVNPQSK	R	V	0.997	98.7	26.7	19.2	98.7	0	2	4	0	2	1873.95	8581.48	91701200	142	157
Mudpit_Aged L3 4 Anterior NP IAF	Inter-alpha-trypsin inhibitor heavy chain H1 OS=Homo sapiens GN=ITIH1 PE=1 SV=3	P19827	ITIH1	101390	15	29	94	VTFQLTYEEVLK	K	R	0.997	67.6	26.1	24	60.8	0	3	0	0	2	1469.79	9144.28	31405600	158	169
Mudpit_Aged L3 4 Anterior NP IAF	Carbonic anhydrase 1 (Fragment) OS=Homo sapiens GN=CA1 PE=1 SV=1	E5RFE7,E5RH81,E5RHP7,H0YBE2,P00915,V9HWE3	CA1,HEL-S-11	28870.4	2	2	3	GGPFSDSYR	K	L	0.997	54.5	25	16.4	54.5	0	2	0	0	2	985.437	3517.7	5829320	82	90
Mudpit_Aged L3 4 Anterior NP IAF	Carbonic anhydrase 1 (Fragment) OS=Homo sapiens GN=CA1 PE=1 SV=1	E5RFE7,E5RH81,E5RHP7,H0YBE2,P00915,V9HWE3	CA1,HEL-S-11	28870.4	2	2	3	VLDALQAIK	K	T	0.949	25.2	25	14.6	25.2	0	1	0	0	2	970.593	6743.39	15469100	161	169
Mudpit_Aged L3 4 Anterior NP IAF	Vimentin OS=Homo sapiens GN=VIM PE=1 SV=4	P08670,V9HWE1	HEL113,VIM	53652.7	12	16	30	DNLAEDIMR	R	L	0.971	26.8	25	14.7	26.8	0	1	0	0	2	1092.5	4265.54	10399500	176	184
Mudpit_Aged L3 4 Anterior NP IAF	Vimentin OS=Homo sapiens GN=VIM PE=1 SV=4	P08670,V9HWE1	HEL113,VIM	53652.7	12	16	30	EMEENFAVEAANYQDTIGR	R	L	0.997	138	25	21.6	138	0	2	2	0	2	2202.96	7807.31	19885200	346	364
Mudpit_Aged L3 4 Anterior NP IAF	Vimentin OS=Homo sapiens GN=VIM PE=1 SV=4	P08670,V9HWE1	HEL113,VIM	53652.7	12	16	30	EYQDLLNVK	R	M	0.996	40.8	27.3	15.6	0	0	3	0	0	2	1121.58	5829.42	31093500	382	390
Mudpit_Aged L3 4 Anterior NP IAF	Vimentin OS=Homo sapiens GN=VIM PE=1 SV=4	P08670,V9HWE1	HEL113,VIM	53652.7	12	16	30	FADLSEAANR	K	N	0.997	45.2	29.9	15.8	45.2	0	4	0	0	2	1093.53	3852.31	144099000	295	304
Mudpit_Aged L3 4 Anterior NP IAF	Vimentin OS=Homo sapiens GN=VIM PE=1 SV=4	P08670,V9HWE1	HEL113,VIM	53652.7	12	16	30	ILLAELEQLK	K	G	0.997	52.1	25	16.3	52	0	2	0	0	2	1169.71	8751.76	28288700	130	139
Mudpit_Aged L3 4 Anterior NP IAF	Vimentin OS=Homo sapiens GN=VIM PE=1 SV=4	P08670,V9HWE1	HEL113,VIM	53652.7	12	16	30	LGDLYEEEMR	R	E	0.997	63.3	25	17	63.3	0	4	0	0	2	1270.56	4515.63	28712500	146	155
Mudpit_Aged L3 4 Anterior NP IAF	Vimentin OS=Homo sapiens GN=VIM PE=1 SV=4	P08670,V9HWE1	HEL113,VIM	53652.7	12	16	30	LQDEIQNMK	R	E	0.997	45.9	27.2	16	45.8	0	6	0	0	2	1118.55	3405.39	41537700	365	373
Mudpit_Aged L3 4 Anterior NP IAF	Vimentin OS=Homo sapiens GN=VIM PE=1 SV=4	P08670,V9HWE1	HEL113,VIM	53652.7	12	16	30	MALDIEIATYR	K	K	0.997	44.8	26.1	15.8	0	0	1	0	0	2	1295.67	7983.58	5349800	391	401
Mudpit_Aged L3 4 Anterior NP IAF	Vimentin OS=Homo sapiens GN=VIM PE=1 SV=4	P08670,V9HWE1	HEL113,VIM	53652.7	12	16	30	NLQEAEEWYK	K	S	0.997	53.9	25.6	16.4	53.9	0	1	0	0	2	1309.61	6146.93	5160010	283	292
Mudpit_Aged L3 4 Anterior NP IAF	Vimentin OS=Homo sapiens GN=VIM PE=1 SV=4	P08670,V9HWE1	HEL113,VIM	53652.7	12	16	30	SLYASSPGGVYATR	R	S	0.99	30.9	26	14.9	30.9	0	1	0	0	2	1428.71	4595.25	10847300	51	64
Mudpit_Aged L3 4 Anterior NP IAF	Vimentin OS=Homo sapiens GN=VIM PE=1 SV=4	P08670,V9HWE1	HEL113,VIM	53652.7	12	16	30	VELQELNDR	K	F	0.997	56.9	26.4	23.6	50	0	2	0	0	2	1115.57	4342.37	39308900	105	113
Mudpit_Aged L3 4 Anterior NP IAF	Vimentin OS=Homo sapiens GN=VIM PE=1 SV=4	P08670,V9HWE1	HEL113,VIM	53652.7	12	16	30	VESLQEEIAFLK	K	K	0.997	60.5	26.3	21.8	55.4	0	1	0	0	2	1405.76	8626.18	12676500	224	235
Mudpit_Aged L3 4 Anterior NP IAF	Annexin A5 OS=Homo sapiens GN=ANXA5 PE=1 SV=2	P08758,V9HWE0	ANXA5,HEL-S-7	35938.6	11	11	17	ETSGNLEQLLLAVVK	R	S	0.997	102	25.2	19.4	102	0	1	0	0	2	1613.91	9529.13	14027400	228	242
Mudpit_Aged L3 4 Anterior NP IAF	Annexin A5 OS=Homo sapiens GN=ANXA5 PE=1 SV=2	P08758,V9HWE0	ANXA5,HEL-S-7	35938.6	11	11	17	FITIFGTR	K	S	0.99	37.7	25	20.1	33	0	1	0	0	2	954.541	7586.18	9245600	194	201
Mudpit_Aged L3 4 Anterior NP IAF	Annexin A5 OS=Homo sapiens GN=ANXA5 PE=1 SV=2	P08758,V9HWE0	ANXA5,HEL-S-7	35938.6	11	11	17	GLGTDEESILTLLTSR	K	S	0.997	118	27.8	20.4	118	0	2	0	0	2	1704.9	9451.15	32258500	30	45
Mudpit_Aged L3 4 Anterior NP IAF	Annexin A5 OS=Homo sapiens GN=ANXA5 PE=1 SV=2	P08758,V9HWE0	ANXA5,HEL-S-7	35938.6	11	11	17	GTVTDFPGFDER	R	A	0.997	43.5	25	15.7	43.5	0	1	0	0	2	1340.61	6547.26	14738100	7	18
Mudpit_Aged L3 4 Anterior NP IAF	Annexin A5 OS=Homo sapiens GN=ANXA5 PE=1 SV=2	P08758,V9HWE0	ANXA5,HEL-S-7	35938.6	11	11	17	LYDAYELK	R	H	0.99	32.1	25	15	32.1	0	2	0	0	2	1014.51	5380.98	26629700	90	97
Mudpit_Aged L3 4 Anterior NP IAF	Annexin A5 OS=Homo sapiens GN=ANXA5 PE=1 SV=2	P08758,V9HWE0	ANXA5,HEL-S-7	35938.6	11	11	17	QEISAAFK	R	T	0.99	44.1	26.7	29.9	30	0	2	0	0	2	893.473	3592.88	16064900	51	58
Mudpit_Aged L3 4 Anterior NP IAF	Annexin A5 OS=Homo sapiens GN=ANXA5 PE=1 SV=2	P08758,V9HWE0	ANXA5,HEL-S-7	35938.6	11	11	17	QVYEEEYGSSLEDDVVGDTSGYYQR	K	M	0.991	69.5	25	17.3	69.5	0	0	1	0	2	2888.24	8198.2	4732370	127	151
Mudpit_Aged L3 4 Anterior NP IAF	Annexin A5 OS=Homo sapiens GN=ANXA5 PE=1 SV=2	P08758,V9HWE0	ANXA5,HEL-S-7	35938.6	11	11	17	SEIDLFNIR	R	K	0.997	58.7	27.2	16.7	58.7	0	2	0	0	2	1106.58	8536.24	20196100	277	285
Mudpit_Aged L3 4 Anterior NP IAF	Annexin A5 OS=Homo sapiens GN=ANXA5 PE=1 SV=2	P08758,V9HWE0	ANXA5,HEL-S-7	35938.6	11	11	17	SIPAYLAETLYYAMK	R	G	0.988	50.2	27.3	16.1	50.2	0	0	1	0	2	1733.88	9456.55	8538970	246	260
Mudpit_Aged L3 4 Anterior NP IAF	Annexin A5 OS=Homo sapiens GN=ANXA5 PE=1 SV=2	P08758,V9HWE0	ANXA5,HEL-S-7	35938.6	11	11	17	VLTEIIASR	K	T	0.997	53.4	25.6	17	52.8	0	3	0	0	2	1001.6	5467.18	25219200	109	117
Mudpit_Aged L3 4 Anterior NP IAF	Annexin A5 OS=Homo sapiens GN=ANXA5 PE=1 SV=2	P08758,V9HWE0	ANXA5,HEL-S-7	35938.6	11	11	17	YMTISGFQIEETIDR	K	E	0.997	63.8	25.5	17	63.8	0	1	0	0	2	1818.86	7812.15	4419290	213	227
Mudpit_Aged L3 4 Anterior NP IAF	Matrilin-2 OS=Homo sapiens GN=MATN2 PE=1 SV=4	A0A140VKH7_HUMAN,O00339	MATN2	106836	4	4	5	AAIVFTDGR	R	A	0.997	42.9	27.7	15.7	42.9	0	1	0	0	2	949.51	4385.45	8663930	762	770
Mudpit_Aged L3 4 Anterior NP IAF	Matrilin-2 OS=Homo sapiens GN=MATN2 PE=1 SV=4	A0A140VKH7_HUMAN,O00339	MATN2	106836	4	4	5	AIEEELQEIASEPTNK	K	H	0.997	91.3	25.9	18.7	91.3	0	1	0	0	2	1800.89	7465.68	5980010	797	812
Mudpit_Aged L3 4 Anterior NP IAF	Matrilin-2 OS=Homo sapiens GN=MATN2 PE=1 SV=4	A0A140VKH7_HUMAN,O00339	MATN2	106836	4	4	5	AQDDVSEWASK	R	A	0.997	54.4	25	16.4	54.4	0	2	0	0	2	1235.55	4049.55	9007350	771	781
Mudpit_Aged L3 4 Anterior NP IAF	Matrilin-2 OS=Homo sapiens GN=MATN2 PE=1 SV=4	A0A140VKH7_HUMAN,O00339	MATN2	106836	4	4	5	VGLLQYGSTVK	R	N	0.997	43.2	25.8	15.7	43.2	0	1	0	0	2	1164.66	6479.54	5237750	96	106
Mudpit_Aged L3 4 Anterior NP IAF	Alpha-1B-glycoprotein OS=Homo sapiens GN=A1BG PE=1 SV=4	P04217,V9HWD8	A1BG,HEL-S-163pA	54253.3	6	8	24	ATWSGAVLAGR	R	D	0.997	62	27.3	16.9	62	0	3	0	0	2	1088.58	5864.47	89124500	407	417
Mudpit_Aged L3 4 Anterior NP IAF	Alpha-1B-glycoprotein OS=Homo sapiens GN=A1BG PE=1 SV=4	P04217,V9HWD8	A1BG,HEL-S-163pA	54253.3	6	8	24	HQFLLTGDTQGR	K	Y	0.997	70.7	25.9	17.4	70.7	0	4	5	0	2	1372.7	5265.09	130747000	79	90
Mudpit_Aged L3 4 Anterior NP IAF	Alpha-1B-glycoprotein OS=Homo sapiens GN=A1BG PE=1 SV=4	P04217,V9HWD8	A1BG,HEL-S-163pA	54253.3	6	8	24	LLELTGPK	K	S	0.99	44	25	19.8	39.9	0	5	0	0	2	870.53	5055.41	120039000	107	114
Mudpit_Aged L3 4 Anterior NP IAF	Alpha-1B-glycoprotein OS=Homo sapiens GN=A1BG PE=1 SV=4	P04217,V9HWD8	A1BG,HEL-S-163pA	54253.3	6	8	24	NGVAQEPVHLDSPAIK	K	H	0.948	34.2	27.1	15.1	34.2	0	0	1	0	2	1674.88	5825.7	34162600	63	78
Mudpit_Aged L3 4 Anterior NP IAF	Alpha-1B-glycoprotein OS=Homo sapiens GN=A1BG PE=1 SV=4	P04217,V9HWD8	A1BG,HEL-S-163pA	54253.3	6	8	24	SGLSTGWTQLSK	R	L	0.997	82.9	27	20	81	0	3	0	0	2	1264.65	6288.52	24501600	95	106
Mudpit_Aged L3 4 Anterior NP IAF	Alpha-1B-glycoprotein OS=Homo sapiens GN=A1BG PE=1 SV=4	P04217,V9HWD8	A1BG,HEL-S-163pA	54253.3	6	8	24	TPGAAANLELIFVGPQHAGNYR	R	C	0.997	76.7	26.4	17.8	76.7	0	1	2	0	2	2296.18	9351.58	28625200	448	469
Mudpit_Aged L3 4 Anterior NP IAF	Calcyphosin OS=Homo sapiens GN=CAPS PE=1 SV=1	K7EL21,Q13938,Q8NF12	CAPS,FLJ00390	20967.7	4	4	6	EAVIAAAFAK	R	L	0.997	70.9	26.9	17.4	70.9	0	2	0	0	2	990.562	6000.4	8704770	95	104
Mudpit_Aged L3 4 Anterior NP IAF	Calcyphosin OS=Homo sapiens GN=CAPS PE=1 SV=1	K7EL21,Q13938,Q8NF12	CAPS,FLJ00390	20967.7	4	4	6	SGDGVVTVDDLR	R	G	0.997	41.3	26.7	15.6	41.3	0	1	0	0	2	1232.61	5167.31	7129070	108	119
Mudpit_Aged L3 4 Anterior NP IAF	Calcyphosin OS=Homo sapiens GN=CAPS PE=1 SV=1	K7EL21,Q13938,Q8NF12	CAPS,FLJ00390	20967.7	4	4	6	SGEWTEDEVLR	R	R	0.997	46.6	25	15.9	46.6	0	1	0	0	2	1320.61	6245.23	3890620	132	142
Mudpit_Aged L3 4 Anterior NP IAF	Calcyphosin OS=Homo sapiens GN=CAPS PE=1 SV=1	K7EL21,Q13938,Q8NF12	CAPS,FLJ00390	20967.7	4	4	6	SLDADEFR	R	Q	0.99	49.5	25.1	18.8	46.9	0	2	0	0	2	952.437	4312.07	13680600	40	47
Mudpit_Aged L3 4 Anterior NP IAF	Cartilage intermediate layer protein 1 OS=Homo sapiens GN=CILP PE=1 SV=4	O75339	CILP	132565	25	36	178	AETPYMVMNPETK	R	A	0.997	77.1	25	17.8	33.1	0	37	2	0	2	1526.69	4199.66	321735000	306	318
Mudpit_Aged L3 4 Anterior NP IAF	Cartilage intermediate layer protein 1 OS=Homo sapiens GN=CILP PE=1 SV=4	O75339	CILP	132565	25	36	178	ASVTFLDPR	K	N	0.997	62.3	28.5	21.9	57.2	0	6	0	0	2	1005.54	5830.97	132102000	622	630
Mudpit_Aged L3 4 Anterior NP IAF	Cartilage intermediate layer protein 1 OS=Homo sapiens GN=CILP PE=1 SV=4	O75339	CILP	132565	25	36	178	CSGMLYDQDR	K	V	0.997	58.5	25	16.7	58.5	0	1	0	0	2	1245.49	3954.77	3755050	1010	1019
Mudpit_Aged L3 4 Anterior NP IAF	Cartilage intermediate layer protein 1 OS=Homo sapiens GN=CILP PE=1 SV=4	O75339	CILP	132565	25	36	178	DEVTSEPLNAGK	R	V	0.997	50.8	25	16.2	50.8	0	5	0	0	2	1259.61	2999.43	30489100	666	677
Mudpit_Aged L3 4 Anterior NP IAF	Cartilage intermediate layer protein 1 OS=Homo sapiens GN=CILP PE=1 SV=4	O75339	CILP	132565	25	36	178	EQRPGQNCSNYTVR	R	F	0.971	39.1	25	15.4	39.1	0	0	1	0	2	1709.77	2809.92	13835000	123	136
Mudpit_Aged L3 4 Anterior NP IAF	Cartilage intermediate layer protein 1 OS=Homo sapiens GN=CILP PE=1 SV=4	O75339	CILP	132565	25	36	178	FAPIVLTMPK	K	T	0.997	51.6	26.3	16.2	51.6	0	6	0	0	2	1132.64	7300.99	254950000	282	291
Mudpit_Aged L3 4 Anterior NP IAF	Cartilage intermediate layer protein 1 OS=Homo sapiens GN=CILP PE=1 SV=4	O75339	CILP	132565	25	36	178	FGHVYMGNSR	R	V	0.976	33.7	25	15.1	33.7	0	0	1	0	2	1183.53	4081.14	5509140	507	516
Mudpit_Aged L3 4 Anterior NP IAF	Cartilage intermediate layer protein 1 OS=Homo sapiens GN=CILP PE=1 SV=4	O75339	CILP	132565	25	36	178	FLCPPGSLR	R	R	0.997	37.4	27.7	15.3	37.4	0	1	0	0	2	1047.53	6346.01	3986880	137	145
Mudpit_Aged L3 4 Anterior NP IAF	Cartilage intermediate layer protein 1 OS=Homo sapiens GN=CILP PE=1 SV=4	O75339	CILP	132565	25	36	178	FLPSEQIQGVVISVINLEPR	R	T	0.997	102	25	19.4	102	0	5	27	0	2	2238.25	10068.5	175291000	764	783
Mudpit_Aged L3 4 Anterior NP IAF	Cartilage intermediate layer protein 1 OS=Homo sapiens GN=CILP PE=1 SV=4	O75339	CILP	132565	25	36	178	FNPNAIGVPQPYLNK	K	L	0.997	49.7	31.9	16.1	49.7	0	2	0	0	2	1671.89	7397.12	15850200	842	856
Mudpit_Aged L3 4 Anterior NP IAF	Cartilage intermediate layer protein 1 OS=Homo sapiens GN=CILP PE=1 SV=4	O75339	CILP	132565	25	36	178	FYQIEGDR	R	Y	0.99	37.3	25	29.7	23	0	4	0	0	2	1027.48	3904.83	213586000	914	921
Mudpit_Aged L3 4 Anterior NP IAF	Cartilage intermediate layer protein 1 OS=Homo sapiens GN=CILP PE=1 SV=4	O75339	CILP	132565	25	36	178	GSAVFHEIK	K	M	0.997	78.4	27.2	17.9	78.4	0	4	0	0	2	987.526	4764.48	64342600	561	569
Mudpit_Aged L3 4 Anterior NP IAF	Cartilage intermediate layer protein 1 OS=Homo sapiens GN=CILP PE=1 SV=4	O75339	CILP	132565	25	36	178	GTFTLHVPQDTER	K	L	0.997	91.5	26.3	18.7	91.5	0	8	7	0	2	1500.74	6017.31	1470540000	524	536
Mudpit_Aged L3 4 Anterior NP IAF	Cartilage intermediate layer protein 1 OS=Homo sapiens GN=CILP PE=1 SV=4	O75339	CILP	132565	25	36	178	IVGPLEVNVR	K	S	0.997	52.9	25	16.3	52.9	0	7	0	0	2	1095.65	6326.17	720925000	960	969
Mudpit_Aged L3 4 Anterior NP IAF	Cartilage intermediate layer protein 1 OS=Homo sapiens GN=CILP PE=1 SV=4	O75339	CILP	132565	25	36	178	LFNLDVPESR	R	R	0.997	45.1	26.8	15.8	45.1	0	3	0	0	2	1189.62	7431	88668600	741	750
Mudpit_Aged L3 4 Anterior NP IAF	Cartilage intermediate layer protein 1 OS=Homo sapiens GN=CILP PE=1 SV=4	O75339	CILP	132565	25	36	178	LLTQTDSDGR	K	F	0.997	47.8	27.8	16	47.8	0	1	0	0	2	1105.55	2054.49	1643600	252	261
Mudpit_Aged L3 4 Anterior NP IAF	Cartilage intermediate layer protein 1 OS=Homo sapiens GN=CILP PE=1 SV=4	O75339	CILP	132565	25	36	178	LVLTFVDR	R	L	0.99	58.5	25.1	16.7	58.5	0	12	0	0	2	962.567	7315.97	1031330000	537	544
Mudpit_Aged L3 4 Anterior NP IAF	Cartilage intermediate layer protein 1 OS=Homo sapiens GN=CILP PE=1 SV=4	O75339	CILP	132565	25	36	178	LWSLNPDTGLWEEEGDFK	K	F	0.997	110	31.1	19.9	110	0	3	1	0	2	2135.99	9180.69	92570500	698	715
Mudpit_Aged L3 4 Anterior NP IAF	Cartilage intermediate layer protein 1 OS=Homo sapiens GN=CILP PE=1 SV=4	O75339	CILP	132565	25	36	178	QSAFQYLQSTPAQSPAAGTVQGR	R	V	0.997	127	26.1	20.9	127	0	3	3	0	2	2393.18	6968.78	33493600	1127	1149
Mudpit_Aged L3 4 Anterior NP IAF	Cartilage intermediate layer protein 1 OS=Homo sapiens GN=CILP PE=1 SV=4	O75339	CILP	132565	25	36	178	QTMLTQSVR	R	R	0.997	41.2	26.7	15.6	41.2	0	1	0	0	2	1079.55	2327.6	918159	23	31
Mudpit_Aged L3 4 Anterior NP IAF	Cartilage intermediate layer protein 1 OS=Homo sapiens GN=CILP PE=1 SV=4	O75339	CILP	132565	25	36	178	SNVGVALTFNCVER	K	Q	0.997	51.6	25.5	16.2	51.6	0	2	0	0	2	1566.76	6644.33	38373400	1109	1122
Mudpit_Aged L3 4 Anterior NP IAF	Cartilage intermediate layer protein 1 OS=Homo sapiens GN=CILP PE=1 SV=4	O75339	CILP	132565	25	36	178	TFLVGNLEIR	R	E	0.997	60.5	25.2	16.8	60.5	0	8	0	0	2	1161.66	8737.83	152134000	728	737
Mudpit_Aged L3 4 Anterior NP IAF	Cartilage intermediate layer protein 1 OS=Homo sapiens GN=CILP PE=1 SV=4	O75339	CILP	132565	25	36	178	TTDWTPAGSTGQVVHGSPR	R	E	0.997	126	25.7	22.5	124	0	5	6	0	2	1953.94	4883.4	604737000	96	114
Mudpit_Aged L3 4 Anterior NP IAF	Cartilage intermediate layer protein 1 OS=Homo sapiens GN=CILP PE=1 SV=4	O75339	CILP	132565	25	36	178	TYGMFSVDFR	R	D	0.997	71	25	17.4	71	0	5	0	0	2	1222.56	7264.97	56254700	656	665
Mudpit_Aged L3 4 Anterior NP IAF	Cartilage intermediate layer protein 1 OS=Homo sapiens GN=CILP PE=1 SV=4	O75339	CILP	132565	25	36	178	VAQLIVIASDETPCNPVPESYLIR	K	L	0.996	54.7	25.3	16.4	54.7	0	1	0	0	2	2685.38	9247.5	3364080	389	412
Mudpit_Aged L3 4 Anterior NP IAF	Peroxiredoxin-6 OS=Homo sapiens GN=PRDX6 PE=1 SV=3	P30041,V9HWC7	HEL-S-128m,PRDX6	25036.1	2	2	2	LPFPIIDDR	K	N	0.997	38.3	25.4	15.8	37.9	0	1	0	0	2	1085.6	8673.85	16443200	98	106
Mudpit_Aged L3 4 Anterior NP IAF	Peroxiredoxin-6 OS=Homo sapiens GN=PRDX6 PE=1 SV=3	P30041,V9HWC7	HEL-S-128m,PRDX6	25036.1	2	2	2	VVFVFGPDK	R	K	0.962	28.4	27	14.8	28.4	0	1	0	0	2	1007.56	6958.09	8609650	133	141
Mudpit_Aged L3 4 Anterior NP IAF	Peptidyl-prolyl cis-trans isomerase B OS=Homo sapiens GN=PPIB PE=1 SV=2	P23284,V9HWC6	HEL-S-39,PPIB	23743.2	3	3	4	DFMIQGGDFTR	K	G	0.997	68.3	25	17.3	68.3	0	1	0	0	2	1286.58	6818.79	16113900	99	109
Mudpit_Aged L3 4 Anterior NP IAF	Peptidyl-prolyl cis-trans isomerase B OS=Homo sapiens GN=PPIB PE=1 SV=2	P23284,V9HWC6	HEL-S-39,PPIB	23743.2	3	3	4	TVDNFVALATGEK	K	G	0.976	33	27.3	15.1	33	0	1	0	0	2	1364.71	6957.04	4831230	72	84
Mudpit_Aged L3 4 Anterior NP IAF	Peptidyl-prolyl cis-trans isomerase B OS=Homo sapiens GN=PPIB PE=1 SV=2	P23284,V9HWC6	HEL-S-39,PPIB	23743.2	3	3	4	VLEGMEVVR	K	K	0.955	29.2	28.2	25	19	0	2	0	0	2	1047.55	2994.21	15836500	172	180
Mudpit_Aged L3 4 Anterior NP IAF	Moesin OS=Homo sapiens GN=MSN PE=1 SV=3	P26038,V9HWC0	HEL70,MSN	67821.8	7	7	8	ALELEQER	R	K	0.99	37.9	27.7	27.2	26.1	0	1	0	0	2	987.511	3206.12	4611230	372	379
Mudpit_Aged L3 4 Anterior NP IAF	Moesin OS=Homo sapiens GN=MSN PE=1 SV=3	P26038,V9HWC0	HEL70,MSN	67821.8	7	7	8	APDFVFYAPR	K	L	0.997	43.5	25.5	15.7	43.5	0	1	0	0	2	1182.59	8090.56	3085350	264	273
Mudpit_Aged L3 4 Anterior NP IAF	Moesin OS=Homo sapiens GN=MSN PE=1 SV=3	P26038,V9HWC0	HEL70,MSN	67821.8	7	7	8	AQMVQEDLEK	K	T	0.997	55.2	25	16.4	55.2	0	1	0	0	2	1190.57	3770.42	4296530	449	458
Mudpit_Aged L3 4 Anterior NP IAF	Moesin OS=Homo sapiens GN=MSN PE=1 SV=3	P26038,V9HWC0	HEL70,MSN	67821.8	7	7	8	EDAVLEYLK	R	I	0.997	65.3	26.5	17.1	65.3	0	2	0	0	2	1079.56	7411.22	11516900	185	193
Mudpit_Aged L3 4 Anterior NP IAF	Moesin OS=Homo sapiens GN=MSN PE=1 SV=3	P26038,V9HWC0	HEL70,MSN	67821.8	7	7	8	FYPEDVSEELIQDITQR	K	L	0.997	96.8	26	19.1	96.8	0	1	0	0	2	2082	9333.38	8689440	84	100
Mudpit_Aged L3 4 Anterior NP IAF	Moesin OS=Homo sapiens GN=MSN PE=1 SV=3	P26038,V9HWC0	HEL70,MSN	67821.8	7	7	8	IGFPWSEIR	K	N	0.996	38.2	26.5	16.6	37	0	1	0	0	2	1104.58	9073.89	23499600	238	246
Mudpit_Aged L3 4 Anterior NP IAF	Moesin OS=Homo sapiens GN=MSN PE=1 SV=3	P26038,V9HWC0	HEL70,MSN	67821.8	7	7	8	ISQLEMAR	R	Q	0.99	47.5	26.7	16	47.5	0	1	0	0	2	947.498	3318.51	10817500	428	435
Mudpit_Aged L3 4 Anterior NP IAF	EGF-like repeat and discoidin I-like domain-containing protein 3 OS=Homo sapiens GN=EDIL3 PE=1 SV=1	O43854	EDIL3	53765	9	11	19	GTNEDMVFR	K	G	0.997	65.5	25	17.1	65.5	0	3	0	0	2	1068.48	4278.15	19166800	264	272
Mudpit_Aged L3 4 Anterior NP IAF	EGF-like repeat and discoidin I-like domain-containing protein 3 OS=Homo sapiens GN=EDIL3 PE=1 SV=1	O43854	EDIL3	53765	9	11	19	IGSPEYIK	R	S	0.99	47.3	27	22.8	40.5	0	3	0	0	2	906.493	3532.19	13485900	237	244
Mudpit_Aged L3 4 Anterior NP IAF	EGF-like repeat and discoidin I-like domain-containing protein 3 OS=Homo sapiens GN=EDIL3 PE=1 SV=1	O43854	EDIL3	53765	9	11	19	LAYSNDGEHWTVYQDEK	K	Q	0.995	54.7	25	16.4	54.7	0	0	3	0	2	2054.91	6320.5	24640900	410	426
Mudpit_Aged L3 4 Anterior NP IAF	EGF-like repeat and discoidin I-like domain-containing protein 3 OS=Homo sapiens GN=EDIL3 PE=1 SV=1	O43854	EDIL3	53765	9	11	19	NVIDPPIYAR	K	H	0.959	27.8	26.4	14.7	27.8	0	1	0	0	2	1157.63	5489.43	50482000	445	454
Mudpit_Aged L3 4 Anterior NP IAF	EGF-like repeat and discoidin I-like domain-containing protein 3 OS=Homo sapiens GN=EDIL3 PE=1 SV=1	O43854	EDIL3	53765	9	11	19	SGHIQDYQITASSIFR	K	T	0.997	76.7	26.8	17.8	76.7	0	1	0	0	2	1822.91	9232.17	6335700	327	342
Mudpit_Aged L3 4 Anterior NP IAF	EGF-like repeat and discoidin I-like domain-containing protein 3 OS=Homo sapiens GN=EDIL3 PE=1 SV=1	O43854	EDIL3	53765	9	11	19	TLNMDMFTWEPR	R	K	0.997	70.1	25	17.4	30.3	0	5	0	0	2	1540.69	8886.68	41924800	343	354
Mudpit_Aged L3 4 Anterior NP IAF	EGF-like repeat and discoidin I-like domain-containing protein 3 OS=Homo sapiens GN=EDIL3 PE=1 SV=1	O43854	EDIL3	53765	9	11	19	VFQGNFDNDTHR	K	K	0.988	44.1	25	15.8	44.1	0	0	1	0	2	1449.65	3408.14	2037700	432	443
Mudpit_Aged L3 4 Anterior NP IAF	EGF-like repeat and discoidin I-like domain-containing protein 3 OS=Homo sapiens GN=EDIL3 PE=1 SV=1	O43854	EDIL3	53765	9	11	19	VTGIITQGAK	K	D	0.996	40.8	27.2	25.8	30.6	0	1	0	0	2	987.583	2941.69	26311000	388	397
Mudpit_Aged L3 4 Anterior NP IAF	EGF-like repeat and discoidin I-like domain-containing protein 3 OS=Homo sapiens GN=EDIL3 PE=1 SV=1	O43854	EDIL3	53765	9	11	19	VTGVITQGAK	R	R	0.997	38.2	26.6	15.4	38.2	0	1	0	0	2	973.568	2540.75	262896	226	235
Mudpit_Aged L3 4 Anterior NP IAF	Pyruvate kinase PKM OS=Homo sapiens GN=PKM PE=1 SV=4	P14618,V9HWB8	HEL-S-30,PKM	57937.5	11	15	22	APIIAVTR	R	N	0.99	47.1	25	20.6	42.4	0	2	0	0	2	840.53	4471.48	17616200	448	455
Mudpit_Aged L3 4 Anterior NP IAF	Pyruvate kinase PKM OS=Homo sapiens GN=PKM PE=1 SV=4	P14618,V9HWB8	HEL-S-30,PKM	57937.5	11	15	22	EAEAAIYHLQLFEELR	R	R	0.982	38.2	26.9	15.4	38.2	0	0	1	0	2	1931.99	9267.67	18022900	384	399
Mudpit_Aged L3 4 Anterior NP IAF	Pyruvate kinase PKM OS=Homo sapiens GN=PKM PE=1 SV=4	P14618,V9HWB8	HEL-S-30,PKM	57937.5	11	15	22	GADFLVTEVENGGSLGSK	K	K	0.997	59.6	30.2	16.7	59.6	0	1	0	0	2	1779.88	8152.08	4885580	189	206
Mudpit_Aged L3 4 Anterior NP IAF	Pyruvate kinase PKM OS=Homo sapiens GN=PKM PE=1 SV=4	P14618,V9HWB8	HEL-S-30,PKM	57937.5	11	15	22	GDLGIEIPAEK	R	V	0.997	44.9	27	19.7	41	0	1	0	0	2	1141.61	6301.96	8563910	295	305
Mudpit_Aged L3 4 Anterior NP IAF	Pyruvate kinase PKM OS=Homo sapiens GN=PKM PE=1 SV=4	P14618,V9HWB8	HEL-S-30,PKM	57937.5	11	15	22	GVNLPGAAVDLPAVSEK	K	D	0.997	61.3	26.4	16.8	61.3	0	1	0	0	2	1636.89	7438.41	28175300	208	224
Mudpit_Aged L3 4 Anterior NP IAF	Pyruvate kinase PKM OS=Homo sapiens GN=PKM PE=1 SV=4	P14618,V9HWB8	HEL-S-30,PKM	57937.5	11	15	22	ITLDNAYMEK	K	C	0.997	54.9	25.4	16.4	54.9	0	4	0	0	2	1197.58	4624.83	53684800	142	151
Mudpit_Aged L3 4 Anterior NP IAF	Pyruvate kinase PKM OS=Homo sapiens GN=PKM PE=1 SV=4	P14618,V9HWB8	HEL-S-30,PKM	57937.5	11	15	22	IYVDDGLISLQVK	K	Q	0.997	42.1	25	15.6	42.1	0	1	0	0	2	1462.82	8395.97	17063800	174	186
Mudpit_Aged L3 4 Anterior NP IAF	Pyruvate kinase PKM OS=Homo sapiens GN=PKM PE=1 SV=4	P14618,V9HWB8	HEL-S-30,PKM	57937.5	11	15	22	LAPITSDPTEATAVGAVEASFK	R	C	0.997	115	26.7	20.2	115	0	2	1	0	2	2175.12	8843.96	31944800	401	422
Mudpit_Aged L3 4 Anterior NP IAF	Pyruvate kinase PKM OS=Homo sapiens GN=PKM PE=1 SV=4	P14618,V9HWB8	HEL-S-30,PKM	57937.5	11	15	22	LDIDSPPITAR	R	N	0.997	64.4	26.4	17	64.4	0	3	0	0	2	1197.65	5498.25	28535700	33	43
Mudpit_Aged L3 4 Anterior NP IAF	Pyruvate kinase PKM OS=Homo sapiens GN=PKM PE=1 SV=4	P14618,V9HWB8	HEL-S-30,PKM	57937.5	11	15	22	RFDEILEASDGIMVAR	R	G	0.989	51.5	30.6	16.2	51.5	0	1	2	0	2	1837.91	8262.41	19497600	279	294
Mudpit_Aged L3 4 Anterior NP IAF	Pyruvate kinase PKM OS=Homo sapiens GN=PKM PE=1 SV=4	P14618,V9HWB8	HEL-S-30,PKM	57937.5	11	15	22	VNFAMNVGK	R	A	0.997	50.5	25	16.2	50.5	0	2	0	0	2	995.498	4448.92	6707180	490	498
Mudpit_Aged L3 4 Anterior NP IAF	78 kDa glucose-regulated protein OS=Homo sapiens GN=HSPA5 PE=1 SV=2	P11021,V9HWB4	HEL-S-89n,HSPA5	72334.7	12	13	17	DAGTIAGLNVMR	K	I	0.988	38.9	30.4	15.4	38.9	0	1	0	0	2	1217.63	6423.88	12754700	186	197
Mudpit_Aged L3 4 Anterior NP IAF	78 kDa glucose-regulated protein OS=Homo sapiens GN=HSPA5 PE=1 SV=2	P11021,V9HWB4	HEL-S-89n,HSPA5	72334.7	12	13	17	ETAEAYLGK	K	K	0.997	52.5	27.1	23	45.8	0	2	0	0	2	981.489	3176.19	14063300	155	163
Mudpit_Aged L3 4 Anterior NP IAF	78 kDa glucose-regulated protein OS=Homo sapiens GN=HSPA5 PE=1 SV=2	P11021,V9HWB4	HEL-S-89n,HSPA5	72334.7	12	13	17	FEELNMDLFR	K	S	0.997	39.3	25	15.5	39.3	0	2	0	0	2	1313.62	8576.93	22653000	327	336
Mudpit_Aged L3 4 Anterior NP IAF	78 kDa glucose-regulated protein OS=Homo sapiens GN=HSPA5 PE=1 SV=2	P11021,V9HWB4	HEL-S-89n,HSPA5	72334.7	12	13	17	IEIESFYEGEDFSETLTR	R	A	0.997	74.5	25	17.7	74.5	0	2	0	0	2	2164.99	9069.16	10426400	307	324
Mudpit_Aged L3 4 Anterior NP IAF	78 kDa glucose-regulated protein OS=Homo sapiens GN=HSPA5 PE=1 SV=2	P11021,V9HWB4	HEL-S-89n,HSPA5	72334.7	12	13	17	IEWLESHQDADIEDFK	K	A	0.99	48.1	25	16	48.1	0	0	2	0	2	1974.91	8999.8	17085200	602	617
Mudpit_Aged L3 4 Anterior NP IAF	78 kDa glucose-regulated protein OS=Homo sapiens GN=HSPA5 PE=1 SV=2	P11021,V9HWB4	HEL-S-89n,HSPA5	72334.7	12	13	17	IINEPTAAAIAYGLDK	R	R	0.997	38.6	26.8	15.4	38.6	0	1	0	0	2	1659.9	8407.45	16959300	198	213
Mudpit_Aged L3 4 Anterior NP IAF	78 kDa glucose-regulated protein OS=Homo sapiens GN=HSPA5 PE=1 SV=2	P11021,V9HWB4	HEL-S-89n,HSPA5	72334.7	12	13	17	ITPSYVAFTPEGER	R	L	0.997	42.3	29.6	15.6	42.3	0	1	0	0	2	1566.78	6209.25	11669500	61	74
Mudpit_Aged L3 4 Anterior NP IAF	78 kDa glucose-regulated protein OS=Homo sapiens GN=HSPA5 PE=1 SV=2	P11021,V9HWB4	HEL-S-89n,HSPA5	72334.7	12	13	17	LYGSAGPPPTGEEDTAEKDEL	K	-	0.997	59.7	25	16.7	59.7	0	1	0	0	2	2175.99	5887.23	1214280	634	654
Mudpit_Aged L3 4 Anterior NP IAF	78 kDa glucose-regulated protein OS=Homo sapiens GN=HSPA5 PE=1 SV=2	P11021,V9HWB4	HEL-S-89n,HSPA5	72334.7	12	13	17	NELESYAYSLK	R	N	0.997	59.9	25	16.7	59.9	0	1	0	0	2	1316.64	6551.24	7761910	563	573
Mudpit_Aged L3 4 Anterior NP IAF	78 kDa glucose-regulated protein OS=Homo sapiens GN=HSPA5 PE=1 SV=2	P11021,V9HWB4	HEL-S-89n,HSPA5	72334.7	12	13	17	SQIFSTASDNQPTVTIK	K	V	0.997	119	26.8	20.7	119	0	2	0	0	2	1836.93	5853.87	12466600	448	464
Mudpit_Aged L3 4 Anterior NP IAF	78 kDa glucose-regulated protein OS=Homo sapiens GN=HSPA5 PE=1 SV=2	P11021,V9HWB4	HEL-S-89n,HSPA5	72334.7	12	13	17	TFAPEEISAMVLTK	K	M	0.997	50.7	27	16.2	50.7	0	1	0	0	2	1536.8	9147.87	9085580	139	152
Mudpit_Aged L3 4 Anterior NP IAF	78 kDa glucose-regulated protein OS=Homo sapiens GN=HSPA5 PE=1 SV=2	P11021,V9HWB4	HEL-S-89n,HSPA5	72334.7	12	13	17	TWNDPSVQQDIK	R	F	0.96	27	25.2	14.7	27	0	1	0	0	2	1430.69	4898.64	5855060	102	113
Mudpit_Aged L3 4 Anterior NP IAF	Mannose-binding protein C OS=Homo sapiens GN=MBL2 PE=1 SV=2	P11226	MBL2	26144.1	4	4	4	EEAFLGITDEK	K	T	0.997	44.8	25.2	20.1	40.4	0	1	0	0	2	1251.61	6472.83	38830900	180	190
Mudpit_Aged L3 4 Anterior NP IAF	Mannose-binding protein C OS=Homo sapiens GN=MBL2 PE=1 SV=2	P11226	MBL2	26144.1	4	4	4	FQASVATPR	K	N	0.997	46.9	26.9	20.8	42	0	1	0	0	2	976.521	3209.08	2296550	158	166
Mudpit_Aged L3 4 Anterior NP IAF	Mannose-binding protein C OS=Homo sapiens GN=MBL2 PE=1 SV=2	P11226	MBL2	26144.1	4	4	4	SPDGDSSLAASER	K	K	0.997	40	25	15.5	40	0	1	0	0	2	1291.58	2092.25	1867060	100	112
Mudpit_Aged L3 4 Anterior NP IAF	Mannose-binding protein C OS=Homo sapiens GN=MBL2 PE=1 SV=2	P11226	MBL2	26144.1	4	4	4	TEGQFVDLTGNR	K	L	0.997	74.6	26.6	17.7	74.6	0	1	0	0	2	1336.65	5168.44	9378800	191	202
Mudpit_Aged L3 4 Anterior NP IAF	Phosphatidylinositol-glycan-specific phospholipase D OS=Homo sapiens GN=GPLD1 PE=1 SV=3	P80108	GPLD1	92338.9	2	2	2	IADVTSGLIGGEDGR	R	V	0.997	65.5	26.5	17.1	65.5	0	1	0	0	2	1459.74	5899.32	6032020	743	757
Mudpit_Aged L3 4 Anterior NP IAF	Phosphatidylinositol-glycan-specific phospholipase D OS=Homo sapiens GN=GPLD1 PE=1 SV=3	P80108	GPLD1	92338.9	2	2	2	ILEGFQPSGR	R	F	0.997	54.1	28.8	27.8	42.7	0	1	0	0	2	1103.58	5259.86	5361440	440	449
Mudpit_Aged L3 4 Anterior NP IAF	Complement C3 OS=Homo sapiens GN=C3 PE=1 SV=2	P01024,V9HWA9	C3,HEL-S-62p	187149	62	106	498	AAVYHHFISDGVR	K	K	0.994	54.3	27	16.4	54.3	0	0	7	3	2	1471.74	8975.9	58791300	914	926
Mudpit_Aged L3 4 Anterior NP IAF	Complement C3 OS=Homo sapiens GN=C3 PE=1 SV=2	P01024,V9HWA9	C3,HEL-S-62p	187149	62	106	498	AGDFLEANYMNLQR	K	S	0.997	66.2	25	17.1	66.2	0	6	1	0	2	1641.77	6662.01	437716000	1172	1185
Mudpit_Aged L3 4 Anterior NP IAF	Complement C3 OS=Homo sapiens GN=C3 PE=1 SV=2	P01024,V9HWA9	C3,HEL-S-62p	187149	62	106	498	APSTWLTAYVVK	R	V	0.997	92.3	26.4	18.8	92.3	0	6	2	0	2	1335.73	8629.86	203876000	1073	1084
Mudpit_Aged L3 4 Anterior NP IAF	Complement C3 OS=Homo sapiens GN=C3 PE=1 SV=2	P01024,V9HWA9	C3,HEL-S-62p	187149	62	106	498	AYYENSPQQVFSTEFEVK	R	E	0.997	127	25	22.6	126	0	5	5	0	2	2166	8410.77	73759900	208	225
Mudpit_Aged L3 4 Anterior NP IAF	Complement C3 OS=Homo sapiens GN=C3 PE=1 SV=2	P01024,V9HWA9	C3,HEL-S-62p	187149	62	106	498	DAPDHQELNLDVSLQLPSR	K	S	0.997	98.6	26.8	19.2	98.6	0	2	1	0	2	2147.07	8994.74	59251400	1285	1303
Mudpit_Aged L3 4 Anterior NP IAF	Complement C3 OS=Homo sapiens GN=C3 PE=1 SV=2	P01024,V9HWA9	C3,HEL-S-62p	187149	62	106	498	DFDFVPPVVR	K	W	0.993	34.2	27.6	15.1	34.2	0	6	0	0	2	1190.62	8950.57	551164000	1245	1254
Mudpit_Aged L3 4 Anterior NP IAF	Complement C3 OS=Homo sapiens GN=C3 PE=1 SV=2	P01024,V9HWA9	C3,HEL-S-62p	187149	62	106	498	DICEEQVNSLPGSITK	K	A	0.997	53.3	25	16.3	53.3	0	1	0	0	2	1790.85	6135.6	27317700	1156	1171
Mudpit_Aged L3 4 Anterior NP IAF	Complement C3 OS=Homo sapiens GN=C3 PE=1 SV=2	P01024,V9HWA9	C3,HEL-S-62p	187149	62	106	498	DSITTWEILAVSMSDK	K	K	0.997	70.2	26.2	17.4	70.2	0	4	0	0	2	1811.87	9155.99	61819400	797	812
Mudpit_Aged L3 4 Anterior NP IAF	Complement C3 OS=Homo sapiens GN=C3 PE=1 SV=2	P01024,V9HWA9	C3,HEL-S-62p	187149	62	106	498	DTWVEHWPEEDECQDEENQK	K	Q	0.99	48.8	25	16	48.8	0	0	1	0	2	2604.01	7064.47	9154810	1625	1644
Mudpit_Aged L3 4 Anterior NP IAF	Complement C3 OS=Homo sapiens GN=C3 PE=1 SV=2	P01024,V9HWA9	C3,HEL-S-62p	187149	62	106	498	DYAGVFSDAGLTFTSSSGQQTAQR	K	A	0.997	141	25	21.8	141	0	4	4	0	2	2494.15	8932.64	59865300	634	657
Mudpit_Aged L3 4 Anterior NP IAF	Complement C3 OS=Homo sapiens GN=C3 PE=1 SV=2	P01024,V9HWA9	C3,HEL-S-62p	187149	62	106	498	EDIPPADLSDQVPDTESETR	K	I	0.997	101	25	19.3	101	0	26	15	0	2	2214	6128.03	622077000	960	979
Mudpit_Aged L3 4 Anterior NP IAF	Complement C3 OS=Homo sapiens GN=C3 PE=1 SV=2	P01024,V9HWA9	C3,HEL-S-62p	187149	62	106	498	EGVQKEDIPPADLSDQVPDTESETR	R	I	0.997	80.1	25	18	80.1	0	0	6	0	2	2755.29	6852.76	46694900	955	979
Mudpit_Aged L3 4 Anterior NP IAF	Complement C3 OS=Homo sapiens GN=C3 PE=1 SV=2	P01024,V9HWA9	C3,HEL-S-62p	187149	62	106	498	ENEGFTVTAEGK	K	G	0.997	66.4	25	17.1	66.4	0	8	0	0	2	1281.6	3623.94	37115500	1326	1337
Mudpit_Aged L3 4 Anterior NP IAF	Complement C3 OS=Homo sapiens GN=C3 PE=1 SV=2	P01024,V9HWA9	C3,HEL-S-62p	187149	62	106	498	EPGQDLVVLPLSITTDFIPSFR	R	L	0.997	70	25	17.4	70	0	4	3	0	2	2444.31	9553.63	73693400	509	530
Mudpit_Aged L3 4 Anterior NP IAF	Complement C3 OS=Homo sapiens GN=C3 PE=1 SV=2	P01024,V9HWA9	C3,HEL-S-62p	187149	62	106	498	EVVADSVWVDVK	R	D	0.997	78.2	27.3	17.9	78.2	0	9	0	0	2	1345.7	7104.59	226849000	545	556
Mudpit_Aged L3 4 Anterior NP IAF	Complement C3 OS=Homo sapiens GN=C3 PE=1 SV=2	P01024,V9HWA9	C3,HEL-S-62p	187149	62	106	498	EYVLPSFEVIVEPTEK	K	F	0.997	75.7	26.6	17.7	75.7	0	4	1	0	2	1878.97	9165.07	195444000	226	241
Mudpit_Aged L3 4 Anterior NP IAF	Complement C3 OS=Homo sapiens GN=C3 PE=1 SV=2	P01024,V9HWA9	C3,HEL-S-62p	187149	62	106	498	FVTVQATFGTQVVEK	K	V	0.997	69.1	25.3	17.3	69.1	0	9	0	0	2	1653.88	7925.98	18949600	105	119
Mudpit_Aged L3 4 Anterior NP IAF	Complement C3 OS=Homo sapiens GN=C3 PE=1 SV=2	P01024,V9HWA9	C3,HEL-S-62p	187149	62	106	498	FYYIYNEK	K	G	0.976	26.6	25	21.1	20.1	0	1	0	0	2	1139.54	6364.51	7711080	242	249
Mudpit_Aged L3 4 Anterior NP IAF	Complement C3 OS=Homo sapiens GN=C3 PE=1 SV=2	P01024,V9HWA9	C3,HEL-S-62p	187149	62	106	498	GLEVTITAR	K	F	0.997	50.9	28.2	21.5	45.7	0	9	0	0	2	959.552	4745.62	203499000	250	258
Mudpit_Aged L3 4 Anterior NP IAF	Complement C3 OS=Homo sapiens GN=C3 PE=1 SV=2	P01024,V9HWA9	C3,HEL-S-62p	187149	62	106	498	GQGTLSVVTMYHAK	K	A	0.997	80.4	27.5	18	80.4	0	6	6	0	2	1491.76	6775.17	57346100	1338	1351
Mudpit_Aged L3 4 Anterior NP IAF	Complement C3 OS=Homo sapiens GN=C3 PE=1 SV=2	P01024,V9HWA9	C3,HEL-S-62p	187149	62	106	498	GYTQQLAFR	K	Q	0.997	47.3	25	20.3	42.9	0	6	0	0	2	1083.56	4935.2	180169000	1052	1060
Mudpit_Aged L3 4 Anterior NP IAF	Complement C3 OS=Homo sapiens GN=C3 PE=1 SV=2	P01024,V9HWA9	C3,HEL-S-62p	187149	62	106	498	HLIVTPSGCGEQNMIGMTPTVIAVHYLDETEQWEK	K	F	0.971	39.1	25	15.4	6.46	0	0	0	2	2	4000.88	9690.71	4486880	1002	1036
Mudpit_Aged L3 4 Anterior NP IAF	Complement C3 OS=Homo sapiens GN=C3 PE=1 SV=2	P01024,V9HWA9	C3,HEL-S-62p	187149	62	106	498	HQQTVTIPPK	R	S	0.997	44.4	26.6	15.8	44.4	0	4	0	0	2	1148.64	4176.55	21318200	882	891
Mudpit_Aged L3 4 Anterior NP IAF	Complement C3 OS=Homo sapiens GN=C3 PE=1 SV=2	P01024,V9HWA9	C3,HEL-S-62p	187149	62	106	498	IHWESASLLR	R	S	0.988	41.9	25.1	37	20.5	0	0	1	0	2	1211.65	9214.73	16490800	1311	1320
Mudpit_Aged L3 4 Anterior NP IAF	Complement C3 OS=Homo sapiens GN=C3 PE=1 SV=2	P01024,V9HWA9	C3,HEL-S-62p	187149	62	106	498	ILLQGTPVAQMTEDAVDAER	R	L	0.997	142	26.7	21.9	142	0	15	15	0	2	2157.09	7872.73	721484000	980	999
Mudpit_Aged L3 4 Anterior NP IAF	Complement C3 OS=Homo sapiens GN=C3 PE=1 SV=2	P01024,V9HWA9	C3,HEL-S-62p	187149	62	106	498	IPIEDGSGEVVLSR	R	K	0.997	94.8	26	18.9	94.8	0	12	1	0	2	1470.78	5947.99	525081000	291	304
Mudpit_Aged L3 4 Anterior NP IAF	Complement C3 OS=Homo sapiens GN=C3 PE=1 SV=2	P01024,V9HWA9	C3,HEL-S-62p	187149	62	106	498	ISLPESLK	R	R	0.99	45.4	26.5	36.3	24.9	0	5	0	0	2	886.524	5471.54	100387000	282	289
Mudpit_Aged L3 4 Anterior NP IAF	Complement C3 OS=Homo sapiens GN=C3 PE=1 SV=2	P01024,V9HWA9	C3,HEL-S-62p	187149	62	106	498	KQELSEAEQATR	K	T	0.997	86.9	27.9	18.4	86.9	0	2	2	0	2	1389.7	4036.33	30827600	428	439
Mudpit_Aged L3 4 Anterior NP IAF	Complement C3 OS=Homo sapiens GN=C3 PE=1 SV=2	P01024,V9HWA9	C3,HEL-S-62p	187149	62	106	498	LESEETMVLEAHDAQGDVPVTVTVHDFPGK	R	K	0.997	68.7	25.4	17.3	68.7	0	0	7	3	2	3250.56	8962.55	171600000	36	65
Mudpit_Aged L3 4 Anterior NP IAF	Complement C3 OS=Homo sapiens GN=C3 PE=1 SV=2	P01024,V9HWA9	C3,HEL-S-62p	187149	62	106	498	LVAYYTLIGASGQR	R	E	0.997	74.6	26.5	17.7	74.6	0	4	3	0	2	1511.82	7564.49	208048000	531	544
Mudpit_Aged L3 4 Anterior NP IAF	Complement C3 OS=Homo sapiens GN=C3 PE=1 SV=2	P01024,V9HWA9	C3,HEL-S-62p	187149	62	106	498	NTLIIYLDK	R	V	0.997	43.8	25	15.7	43.8	0	3	0	0	2	1092.63	6987.46	163263000	1442	1450
Mudpit_Aged L3 4 Anterior NP IAF	Complement C3 OS=Homo sapiens GN=C3 PE=1 SV=2	P01024,V9HWA9	C3,HEL-S-62p	187149	62	106	498	QDSLSSQNQLGVLPLSWDIPELVNMGQWK	K	I	0.997	77.5	25.5	17.8	77.5	0	0	1	0	2	3282.65	9505.56	11829300	177	205
Mudpit_Aged L3 4 Anterior NP IAF	Complement C3 OS=Homo sapiens GN=C3 PE=1 SV=2	P01024,V9HWA9	C3,HEL-S-62p	187149	62	106	498	QELSEAEQATR	K	T	0.997	65.2	25	17.1	65.2	0	5	1	0	2	1261.6	2488.3	44793800	429	439
Mudpit_Aged L3 4 Anterior NP IAF	Complement C3 OS=Homo sapiens GN=C3 PE=1 SV=2	P01024,V9HWA9	C3,HEL-S-62p	187149	62	106	498	QGALELIK	R	K	0.99	61	26.8	64	13.8	0	7	0	0	2	871.525	5151.1	211038000	1043	1050
Mudpit_Aged L3 4 Anterior NP IAF	Complement C3 OS=Homo sapiens GN=C3 PE=1 SV=2	P01024,V9HWA9	C3,HEL-S-62p	187149	62	106	498	QKPDGVFQEDAPVIHQEMIGGLR	K	N	0.993	65	26.5	17.1	65	0	0	1	1	2	2580.29	8936.94	260403000	1112	1134
Mudpit_Aged L3 4 Anterior NP IAF	Complement C3 OS=Homo sapiens GN=C3 PE=1 SV=2	P01024,V9HWA9	C3,HEL-S-62p	187149	62	106	498	QPSSAFAAFVK	R	R	0.997	55.4	26.7	16.5	55.4	0	2	0	0	2	1152.6	6651.46	38526200	1061	1071
Mudpit_Aged L3 4 Anterior NP IAF	Complement C3 OS=Homo sapiens GN=C3 PE=1 SV=2	P01024,V9HWA9	C3,HEL-S-62p	187149	62	106	498	QPVPGQQMTLK	R	I	0.997	61.2	26.1	16.8	61.2	0	9	0	0	2	1242.65	2789.93	83436500	574	584
Mudpit_Aged L3 4 Anterior NP IAF	Complement C3 OS=Homo sapiens GN=C3 PE=1 SV=2	P01024,V9HWA9	C3,HEL-S-62p	187149	62	106	498	RIPIEDGSGEVVLSR	K	K	0.997	78.6	26.3	17.9	78.6	0	4	5	0	2	1626.88	6561.65	139918000	290	304
Mudpit_Aged L3 4 Anterior NP IAF	Complement C3 OS=Homo sapiens GN=C3 PE=1 SV=2	P01024,V9HWA9	C3,HEL-S-62p	187149	62	106	498	RQGALELIK	K	K	0.948	29	25.7	31.3	12.6	0	1	0	0	2	1027.63	5813.44	10997000	1042	1050
Mudpit_Aged L3 4 Anterior NP IAF	Complement C3 OS=Homo sapiens GN=C3 PE=1 SV=2	P01024,V9HWA9	C3,HEL-S-62p	187149	62	106	498	SEETKENEGFTVTAEGK	R	G	0.997	105	25	19.5	105	0	4	5	0	2	1855.86	5272.18	70946800	1321	1337
Mudpit_Aged L3 4 Anterior NP IAF	Complement C3 OS=Homo sapiens GN=C3 PE=1 SV=2	P01024,V9HWA9	C3,HEL-S-62p	187149	62	106	498	SEFPESWLWNVEDLK	R	E	0.997	71.5	26	17.5	71.5	0	2	0	0	2	1878.89	9470.99	20047700	765	779
Mudpit_Aged L3 4 Anterior NP IAF	Complement C3 OS=Homo sapiens GN=C3 PE=1 SV=2	P01024,V9HWA9	C3,HEL-S-62p	187149	62	106	498	SEFPESWLWNVEDLKEPPK	R	N	0.997	86.9	25.5	18.4	86.9	0	7	5	0	2	2330.13	9573.39	199623000	765	783
Mudpit_Aged L3 4 Anterior NP IAF	Complement C3 OS=Homo sapiens GN=C3 PE=1 SV=2	P01024,V9HWA9	C3,HEL-S-62p	187149	62	106	498	SGIPIVTSPYQIHFTK	R	T	0.997	61.8	26.2	16.9	61.8	0	2	1	0	2	1787.97	9130.13	50471700	344	359
Mudpit_Aged L3 4 Anterior NP IAF	Complement C3 OS=Homo sapiens GN=C3 PE=1 SV=2	P01024,V9HWA9	C3,HEL-S-62p	187149	62	106	498	SGQSEDRQPVPGQQMTLK	K	I	0.997	60.7	29.8	17.2	60.3	0	3	0	0	2	1985.97	4249.59	5806330	567	584
Mudpit_Aged L3 4 Anterior NP IAF	Complement C3 OS=Homo sapiens GN=C3 PE=1 SV=2	P01024,V9HWA9	C3,HEL-S-62p	187149	62	106	498	SGSDEVQVGQQR	K	T	0.997	74.9	25	17.7	74.9	0	1	0	0	2	1289.61	1946.31	1331870	1571	1582
Mudpit_Aged L3 4 Anterior NP IAF	Complement C3 OS=Homo sapiens GN=C3 PE=1 SV=2	P01024,V9HWA9	C3,HEL-S-62p	187149	62	106	498	SNLDEDIIAEENIVSR	R	S	0.997	134	26.8	21.4	134	0	13	5	0	2	1816.89	8492.08	197703000	749	764
Mudpit_Aged L3 4 Anterior NP IAF	Complement C3 OS=Homo sapiens GN=C3 PE=1 SV=2	P01024,V9HWA9	C3,HEL-S-62p	187149	62	106	498	SSLSVPYVIVPLK	K	T	0.997	60.3	25	16.8	60.3	0	3	0	0	2	1401.84	9093.95	199899000	892	904
Mudpit_Aged L3 4 Anterior NP IAF	Complement C3 OS=Homo sapiens GN=C3 PE=1 SV=2	P01024,V9HWA9	C3,HEL-S-62p	187149	62	106	498	SYTVAIAGYALAQMGR	R	L	0.997	83.7	27.1	18.2	83.7	0	2	1	0	2	1671.85	7888.05	51804100	1186	1201
Mudpit_Aged L3 4 Anterior NP IAF	Complement C3 OS=Homo sapiens GN=C3 PE=1 SV=2	P01024,V9HWA9	C3,HEL-S-62p	187149	62	106	498	TELRPGETLNVNFLLR	R	M	0.997	71.1	25.5	18.8	69.7	0	2	6	0	2	1872.03	9415.48	136513000	463	478
Mudpit_Aged L3 4 Anterior NP IAF	Complement C3 OS=Homo sapiens GN=C3 PE=1 SV=2	P01024,V9HWA9	C3,HEL-S-62p	187149	62	106	498	TGLQEVEVK	K	A	0.997	76.1	27.9	24.9	68.9	0	7	0	0	2	1002.55	3637.63	103482000	905	913
Mudpit_Aged L3 4 Anterior NP IAF	Complement C3 OS=Homo sapiens GN=C3 PE=1 SV=2	P01024,V9HWA9	C3,HEL-S-62p	187149	62	106	498	TIYTPGSTVLYR	K	I	0.997	54.2	26.8	16.4	54.2	0	5	0	0	2	1370.73	6749.77	163501000	137	148
Mudpit_Aged L3 4 Anterior NP IAF	Complement C3 OS=Homo sapiens GN=C3 PE=1 SV=2	P01024,V9HWA9	C3,HEL-S-62p	187149	62	106	498	TMQALPYSTVGNSNNYLHLSVLR	R	T	0.997	95.6	27.1	19	95.6	0	0	5	0	2	2594.3	9108.31	120356000	440	462
Mudpit_Aged L3 4 Anterior NP IAF	Complement C3 OS=Homo sapiens GN=C3 PE=1 SV=2	P01024,V9HWA9	C3,HEL-S-62p	187149	62	106	498	TVMVNIENPEGIPVK	R	Q	0.997	79.2	26.5	18	79.2	0	14	1	0	2	1639.87	6860.24	253637000	162	176
Mudpit_Aged L3 4 Anterior NP IAF	Complement C3 OS=Homo sapiens GN=C3 PE=1 SV=2	P01024,V9HWA9	C3,HEL-S-62p	187149	62	106	498	VEGTAFVIFGIQDGEQR	K	I	0.997	90.1	27.8	18.6	90.1	0	16	5	0	2	1865.94	9367.85	196431000	265	281
Mudpit_Aged L3 4 Anterior NP IAF	Complement C3 OS=Homo sapiens GN=C3 PE=1 SV=2	P01024,V9HWA9	C3,HEL-S-62p	187149	62	106	498	VHQYFNVELIQPGAVK	K	V	0.997	70.7	25.8	17.4	70.7	0	3	3	0	2	1841.99	9246.1	321142000	1463	1478
Mudpit_Aged L3 4 Anterior NP IAF	Complement C3 OS=Homo sapiens GN=C3 PE=1 SV=2	P01024,V9HWA9	C3,HEL-S-62p	187149	62	106	498	VLLDGVQNPR	K	A	0.997	65.4	25	18.1	64.4	0	11	0	0	2	1110.63	4330.11	720955000	306	315
Mudpit_Aged L3 4 Anterior NP IAF	Complement C3 OS=Homo sapiens GN=C3 PE=1 SV=2	P01024,V9HWA9	C3,HEL-S-62p	187149	62	106	498	VPVAVQGEDTVQSLTQGDGVAK	R	L	0.997	144	26.6	22	144	0	14	10	0	2	2198.13	6932.75	555264000	387	408
Mudpit_Aged L3 4 Anterior NP IAF	Complement C3 OS=Homo sapiens GN=C3 PE=1 SV=2	P01024,V9HWA9	C3,HEL-S-62p	187149	62	106	498	VQLSNDFDEYIMAIEQTIK	K	S	0.997	105	25.2	19.6	105	0	4	1	0	2	2257.11	9552.67	30572100	1552	1570
Mudpit_Aged L3 4 Anterior NP IAF	Complement C3 OS=Homo sapiens GN=C3 PE=1 SV=2	P01024,V9HWA9	C3,HEL-S-62p	187149	62	106	498	VTIKPAPETEK	K	R	0.98	40.7	25	15.5	40.7	0	0	3	0	2	1212.68	3110.54	41248700	1365	1375
Mudpit_Aged L3 4 Anterior NP IAF	Complement C3 OS=Homo sapiens GN=C3 PE=1 SV=2	P01024,V9HWA9	C3,HEL-S-62p	187149	62	106	498	VVLVAVDK	R	G	0.99	60.6	25	16.8	60.6	0	7	0	0	2	842.535	4365.77	197358000	593	600
Mudpit_Aged L3 4 Anterior NP IAF	Complement C3 OS=Homo sapiens GN=C3 PE=1 SV=2	P01024,V9HWA9	C3,HEL-S-62p	187149	62	106	498	YRGDQDATMSILDISMMTGFAPDTDDLK	R	Q	0.997	101	25	19.3	42.5	0	0	32	0	2	3123.4	10080	15992000	1392	1419
Mudpit_Aged L3 4 Anterior NP IAF	Complement C3 OS=Homo sapiens GN=C3 PE=1 SV=2	P01024,V9HWA9	C3,HEL-S-62p	187149	62	106	498	YYTYLIMNK	R	G	0.997	42.4	25.9	15.7	42.4	0	8	0	0	2	1208.6	6384.56	148979000	489	497
Mudpit_Aged L3 4 Anterior NP IAF	ASPN protein OS=Homo sapiens GN=ASPN PE=2 SV=1	Q6P528,Q9BXN1	ASPN	43419.8	3	3	4	IPSGLPELK	K	Y	0.997	45.7	25	45.5	16	0	2	0	0	2	953.567	6069.54	21617400	304	312
Mudpit_Aged L3 4 Anterior NP IAF	ASPN protein OS=Homo sapiens GN=ASPN PE=2 SV=1	Q6P528,Q9BXN1	ASPN	43419.8	3	3	4	ISTVELEDFK	K	R	0.997	58.8	26.9	16.7	58.8	0	1	0	0	2	1180.61	6860.28	8246080	253	262
Mudpit_Aged L3 4 Anterior NP IAF	ASPN protein OS=Homo sapiens GN=ASPN PE=2 SV=1	Q6P528,Q9BXN1	ASPN	43419.8	3	3	4	YWEMQPATFR	K	C	0.987	32.3	25	15	32.3	0	1	0	0	2	1328.61	7554.66	9162760	356	365
Mudpit_Aged L3 4 Anterior NP IAF	Out at first protein homolog OS=Homo sapiens GN=OAF PE=2 SV=1	Q86UD1	OAF	30688.4	5	6	11	ALILGELEK	R	G	0.997	45.3	25	16.8	44.3	0	3	0	0	2	985.593	6786.22	33452100	84	92
Mudpit_Aged L3 4 Anterior NP IAF	Out at first protein homolog OS=Homo sapiens GN=OAF PE=2 SV=1	Q86UD1	OAF	30688.4	5	6	11	ASEQAELPR	K	C	0.997	62.8	25.2	16.9	62.8	0	2	0	0	2	1000.51	2579.04	5688760	195	203
Mudpit_Aged L3 4 Anterior NP IAF	Out at first protein homolog OS=Homo sapiens GN=OAF PE=2 SV=1	Q86UD1	OAF	30688.4	5	6	11	FWLEQGVDSSVFEALPK	R	A	0.997	66.3	26.9	17.1	66.3	0	1	0	0	2	1951.98	9294.28	10470500	178	194
Mudpit_Aged L3 4 Anterior NP IAF	Out at first protein homolog OS=Homo sapiens GN=OAF PE=2 SV=1	Q86UD1	OAF	30688.4	5	6	11	LPDGQVTEESLQADSDADSISLELR	R	K	0.997	108	25.4	19.7	108	0	1	3	0	2	2688.28	8750.6	10567300	38	62
Mudpit_Aged L3 4 Anterior NP IAF	Out at first protein homolog OS=Homo sapiens GN=OAF PE=2 SV=1	Q86UD1	OAF	30688.4	5	6	11	SYSFDFYVPQR	K	Q	0.997	49	25.1	16.1	49	0	1	0	0	2	1408.65	7843.81	7077690	251	261
Mudpit_Aged L3 4 Anterior NP IAF	Cartilage intermediate layer protein 2 OS=Homo sapiens GN=CILP2 PE=1 SV=1	K7EPJ4	CILP2	126857	21	27	80	ADGKPYSGPVEAR	R	V	0.997	72.5	26.8	18.4	71.6	0	0	1	0	2	1346.67	2770.52	5077050	600	612
Mudpit_Aged L3 4 Anterior NP IAF	Cartilage intermediate layer protein 2 OS=Homo sapiens GN=CILP2 PE=1 SV=1	K7EPJ4	CILP2	126857	21	27	80	AHGYGAHLELR	R	G	0.997	65.3	28.4	17.1	65.3	0	0	4	0	2	1223.63	8407.64	26785700	343	353
Mudpit_Aged L3 4 Anterior NP IAF	Cartilage intermediate layer protein 2 OS=Homo sapiens GN=CILP2 PE=1 SV=1	K7EPJ4	CILP2	126857	21	27	80	DLTSAASAPSDLR	R	F	0.997	67.9	27	17.2	67.9	0	5	0	0	2	1303.65	5165.18	44895400	620	632
Mudpit_Aged L3 4 Anterior NP IAF	Cartilage intermediate layer protein 2 OS=Homo sapiens GN=CILP2 PE=1 SV=1	K7EPJ4	CILP2	126857	21	27	80	DQPGTVATSDAHGTFR	R	V	0.997	82	25	18.1	82	0	4	6	0	2	1659.77	3526.57	60790800	238	253
Mudpit_Aged L3 4 Anterior NP IAF	Cartilage intermediate layer protein 2 OS=Homo sapiens GN=CILP2 PE=1 SV=1	K7EPJ4	CILP2	126857	21	27	80	EGTPASWTGDLLAWWPNPQEFR	R	A	0.997	84.5	26.3	18.3	84.5	0	1	1	0	2	2558.21	9501.05	18097600	922	943
Mudpit_Aged L3 4 Anterior NP IAF	Cartilage intermediate layer protein 2 OS=Homo sapiens GN=CILP2 PE=1 SV=1	K7EPJ4	CILP2	126857	21	27	80	FTPSEQVEGVVVTLVNLEPAPGFSANPR	K	A	0.997	70.1	25.7	17.4	70.1	0	0	1	0	2	2954.53	9437.82	17427700	755	782
Mudpit_Aged L3 4 Anterior NP IAF	Cartilage intermediate layer protein 2 OS=Homo sapiens GN=CILP2 PE=1 SV=1	K7EPJ4	CILP2	126857	21	27	80	FVDSDGELAPLR	R	T	0.997	79.8	27.6	18	79.8	0	5	0	0	2	1318.66	6191.48	57792200	633	644
Mudpit_Aged L3 4 Anterior NP IAF	Cartilage intermediate layer protein 2 OS=Homo sapiens GN=CILP2 PE=1 SV=1	K7EPJ4	CILP2	126857	21	27	80	ILLGQEPIGFTAYQGDFTIEVPPSTQR	R	L	0.997	67	25.1	17.2	67	0	0	1	0	2	2977.53	9221.15	13063600	499	525
Mudpit_Aged L3 4 Anterior NP IAF	Cartilage intermediate layer protein 2 OS=Homo sapiens GN=CILP2 PE=1 SV=1	K7EPJ4	CILP2	126857	21	27	80	IQGPQEYMVR	K	S	0.997	55.7	27	22.3	49.8	0	6	0	0	2	1220.61	4270.56	46550100	951	960
Mudpit_Aged L3 4 Anterior NP IAF	Cartilage intermediate layer protein 2 OS=Homo sapiens GN=CILP2 PE=1 SV=1	K7EPJ4	CILP2	126857	21	27	80	LFNLDVPER	R	R	0.997	44.4	28.6	21.1	39	0	1	0	0	2	1102.59	7492.42	6628710	732	740
Mudpit_Aged L3 4 Anterior NP IAF	Cartilage intermediate layer protein 2 OS=Homo sapiens GN=CILP2 PE=1 SV=1	K7EPJ4	CILP2	126857	21	27	80	LLESPATALGDIR	R	R	0.997	74.5	25.2	17.7	74.5	0	2	0	0	2	1355.75	7304.15	33106200	1124	1136
Mudpit_Aged L3 4 Anterior NP IAF	Cartilage intermediate layer protein 2 OS=Homo sapiens GN=CILP2 PE=1 SV=1	K7EPJ4	CILP2	126857	21	27	80	LVVTFVDPSGEFMDAVR	R	V	0.997	98.1	26.4	19.1	98.1	0	8	2	0	2	1881.94	9155.53	320213000	526	542
Mudpit_Aged L3 4 Anterior NP IAF	Cartilage intermediate layer protein 2 OS=Homo sapiens GN=CILP2 PE=1 SV=1	K7EPJ4	CILP2	126857	21	27	80	LWSLNPETGLWEEESGFR	K	R	0.997	93.6	25.1	18.8	93.6	0	1	0	0	2	2150.02	9330.77	16178900	687	704
Mudpit_Aged L3 4 Anterior NP IAF	Cartilage intermediate layer protein 2 OS=Homo sapiens GN=CILP2 PE=1 SV=1	K7EPJ4	CILP2	126857	21	27	80	SVYTGQPSPALEDWEAR	R	A	0.997	52.3	25.9	16.3	52.3	0	2	0	0	2	1905.9	6827.3	5750230	40	56
Mudpit_Aged L3 4 Anterior NP IAF	Cartilage intermediate layer protein 2 OS=Homo sapiens GN=CILP2 PE=1 SV=1	K7EPJ4	CILP2	126857	21	27	80	TTDWALPSAVGER	R	V	0.997	49.1	26.7	16.1	49.1	0	4	0	0	2	1402.7	6715.13	160202000	106	118
Mudpit_Aged L3 4 Anterior NP IAF	Cartilage intermediate layer protein 2 OS=Homo sapiens GN=CILP2 PE=1 SV=1	K7EPJ4	CILP2	126857	21	27	80	TYGMFSVDLR	R	A	0.997	55.9	25	16.5	55.9	0	3	0	0	2	1204.57	7007.25	21906300	645	654
Mudpit_Aged L3 4 Anterior NP IAF	Cartilage intermediate layer protein 2 OS=Homo sapiens GN=CILP2 PE=1 SV=1	K7EPJ4	CILP2	126857	21	27	80	VAVNGLLR	R	D	0.99	47.7	25	19.3	44.3	0	1	0	0	2	841.525	5865.2	4097880	1027	1034
Mudpit_Aged L3 4 Anterior NP IAF	Cartilage intermediate layer protein 2 OS=Homo sapiens GN=CILP2 PE=1 SV=1	K7EPJ4	CILP2	126857	21	27	80	VEADKYEYNVVPFR	R	E	0.993	55.1	26	16.4	55.1	0	0	1	0	2	1728.86	7591.17	12609000	908	921
Mudpit_Aged L3 4 Anterior NP IAF	Cartilage intermediate layer protein 2 OS=Homo sapiens GN=CILP2 PE=1 SV=1	K7EPJ4	CILP2	126857	21	27	80	VFLVGNVEIR	R	E	0.997	43	25.8	15.7	43	0	4	0	0	2	1145.67	8109.38	38121100	719	728
Mudpit_Aged L3 4 Anterior NP IAF	Cartilage intermediate layer protein 2 OS=Homo sapiens GN=CILP2 PE=1 SV=1	K7EPJ4	CILP2	126857	21	27	80	VVAADSGEPLR	R	F	0.997	69.8	25.9	17.4	69.8	0	15	0	0	2	1113.59	2738.61	124860000	485	495
Mudpit_Aged L3 4 Anterior NP IAF	Cartilage intermediate layer protein 2 OS=Homo sapiens GN=CILP2 PE=1 SV=1	K7EPJ4	CILP2	126857	21	27	80	YEYNVVPFR	K	E	0.991	30.6	25.1	14.9	30.6	0	1	0	0	2	1186.59	6535.86	55790600	913	921
Mudpit_Aged L3 4 Anterior NP IAF	cDNA FLJ53075, highly similar to Kininogen-1 OS=Homo sapiens PE=2 SV=1	B4DPP8,D3DNU8	KNG1	47853.5	12	16	42	DFVQPPTK	K	I	0.949	30.9	29.2	14.9	30.9	0	1	0	0	2	931.489	3253.33	36065600	255	262
Mudpit_Aged L3 4 Anterior NP IAF	cDNA FLJ53075, highly similar to Kininogen-1 OS=Homo sapiens PE=2 SV=1	B4DPP8,D3DNU8	KNG1	47853.5	12	16	42	DIPTNSPELEETLTHTITK	R	L	0.997	84.8	27.1	18.3	84.8	0	6	5	0	2	2139.08	8810.57	415244000	270	288
Mudpit_Aged L3 4 Anterior NP IAF	cDNA FLJ53075, highly similar to Kininogen-1 OS=Homo sapiens PE=2 SV=1	B4DPP8,D3DNU8	KNG1	47853.5	12	16	42	IASFSQNCDIYPGK	R	D	0.997	67.7	25	17.2	67.7	0	4	0	0	2	1600.73	5807.72	30746100	241	254
Mudpit_Aged L3 4 Anterior NP IAF	cDNA FLJ53075, highly similar to Kininogen-1 OS=Homo sapiens PE=2 SV=1	B4DPP8,D3DNU8	KNG1	47853.5	12	16	42	IASFSQNCDIYPGKDFVQPPTK	R	I	0.951	36.8	25.6	15.3	36.8	0	0	1	0	2	2513.2	8487.76	3880230	241	262
Mudpit_Aged L3 4 Anterior NP IAF	cDNA FLJ53075, highly similar to Kininogen-1 OS=Homo sapiens PE=2 SV=1	B4DPP8,D3DNU8	KNG1	47853.5	12	16	42	IGEIKEETTSHLR	R	S	0.997	50.1	26.4	16.1	50.1	0	2	1	1	2	1512.8	6259.01	36203100	393	405
Mudpit_Aged L3 4 Anterior NP IAF	cDNA FLJ53075, highly similar to Kininogen-1 OS=Homo sapiens PE=2 SV=1	B4DPP8,D3DNU8	KNG1	47853.5	12	16	42	ITYSIVQTNCSK	R	E	0.997	45.3	25.3	15.8	45.3	0	1	0	0	2	1414.69	4723.24	3224890	197	208
Mudpit_Aged L3 4 Anterior NP IAF	cDNA FLJ53075, highly similar to Kininogen-1 OS=Homo sapiens PE=2 SV=1	B4DPP8,D3DNU8	KNG1	47853.5	12	16	42	LGQSLDCNAEVYVVPWEK	K	K	0.997	92.8	26.4	18.8	92.8	0	5	0	0	2	2108	8718.25	26057400	345	362
Mudpit_Aged L3 4 Anterior NP IAF	cDNA FLJ53075, highly similar to Kininogen-1 OS=Homo sapiens PE=2 SV=1	B4DPP8,D3DNU8	KNG1	47853.5	12	16	42	QVVAGLNFR	R	I	0.997	46.9	26.8	15.9	46.9	0	3	0	0	2	1003.57	6192.45	46740600	188	196
Mudpit_Aged L3 4 Anterior NP IAF	cDNA FLJ53075, highly similar to Kininogen-1 OS=Homo sapiens PE=2 SV=1	B4DPP8,D3DNU8	KNG1	47853.5	12	16	42	SLWNGDTGECTDNAYIDIQLR	K	I	0.997	120	25	20.5	120	0	2	0	0	2	2442.09	9034.78	13789900	220	240
Mudpit_Aged L3 4 Anterior NP IAF	cDNA FLJ53075, highly similar to Kininogen-1 OS=Homo sapiens PE=2 SV=1	B4DPP8,D3DNU8	KNG1	47853.5	12	16	42	TVGSDTFYSFK	K	Y	0.997	59.6	26.6	16.7	59.6	0	4	0	0	2	1251.59	6136.76	56413600	65	75
Mudpit_Aged L3 4 Anterior NP IAF	cDNA FLJ53075, highly similar to Kininogen-1 OS=Homo sapiens PE=2 SV=1	B4DPP8,D3DNU8	KNG1	47853.5	12	16	42	YFIDFVAR	K	E	0.99	37.8	26.1	15.4	37.8	0	4	0	0	2	1030.54	8338.23	179033000	317	324
Mudpit_Aged L3 4 Anterior NP IAF	cDNA FLJ53075, highly similar to Kininogen-1 OS=Homo sapiens PE=2 SV=1	B4DPP8,D3DNU8	KNG1	47853.5	12	16	42	YNSQNQSNNQFVLYR	K	I	0.997	66.1	25	17.1	66.1	0	1	1	0	2	1874.88	5391.47	32654600	44	58
Mudpit_Aged L3 4 Anterior NP IAF	Haptoglobin (Fragment) OS=Homo sapiens GN=HP PE=1 SV=1	H3BS21	HP	24796.4	2	3	11	DIAPTLTLYVGK	K	K	0.997	59.6	25	16.7	59.6	0	6	0	0	2	1290.73	8253.01	88776100	117	128
Mudpit_Aged L3 4 Anterior NP IAF	Haptoglobin (Fragment) OS=Homo sapiens GN=HP PE=1 SV=1	H3BS21	HP	24796.4	2	3	11	KQLVEIEK	K	V	0.99	64.2	26.5	45.8	35.4	0	4	0	0	2	986.588	4823.54	44965700	129	136
Mudpit_Aged L3 4 Anterior NP IAF	Haptoglobin (Fragment) OS=Homo sapiens GN=HP PE=1 SV=1	H3BS21	HP	24796.4	2	3	11	LRTEGDGVYTLNNEK	K	Q	0.997	63.5	26.5	43.3	37.2	0	3	1	0	2	1708.85	4633.8	33689400	58	72
Mudpit_Aged L3 4 Anterior NP IAF	Haptoglobin (Fragment) OS=Homo sapiens GN=HP PE=1 SV=1	H3BS21	HP	24796.4	2	3	11	TEGDGVYTLNNEK	R	Q	0.997	78.9	25	17.9	78.9	0	7	0	0	2	1439.66	3598.18	30054900	60	72
Mudpit_Aged L3 4 Anterior NP IAF	Haptoglobin (Fragment) OS=Homo sapiens GN=HP PE=1 SV=1	H3BS21	HP	24796.4	2	3	11	VGYVSGWGR	R	N	0.997	46.4	25	15.9	46.4	0	5	0	0	2	980.495	5086.22	65473800	179	187
Mudpit_Aged L3 4 Anterior NP IAF	Haptoglobin (Fragment) OS=Homo sapiens GN=HP PE=1 SV=1	H3BS21	HP	24796.4	2	3	11	VVLHPNYSQVDIGLIK	K	L	0.997	66.3	25	17.1	66.3	0	2	3	0	2	1795.01	9130.11	50985100	137	152
Mudpit_Aged L3 4 Anterior NP IAF	Matrix Gla protein OS=Homo sapiens GN=MGP PE=3 SV=1	A0A024RAX0,P08493	MGP	12353.6	2	2	3	NANTFISPQQR	R	W	0.997	55.3	27	18.1	53.7	0	1	0	0	2	1275.64	3655.58	15156600	39	49
Mudpit_Aged L3 4 Anterior NP IAF	Matrix Gla protein OS=Homo sapiens GN=MGP PE=3 SV=1	A0A024RAX0,P08493	MGP	12353.6	2	2	3	YAMVYGYNAAYNR	R	Y	0.997	71.8	25	17.5	71.8	0	2	0	0	2	1571.69	5165.93	5349370	82	94
Mudpit_Aged L3 4 Anterior NP IAF	Fibrillin-1 OS=Homo sapiens GN=FBN1 PE=1 SV=3	P35555	FBN1	312226	3	3	6	DYLSGELGDNLK	K	M	0.997	45	25.9	15.8	45	0	2	0	0	2	1323.64	6559.17	14281600	2852	2863
Mudpit_Aged L3 4 Anterior NP IAF	Fibrillin-1 OS=Homo sapiens GN=FBN1 PE=1 SV=3	P35555	FBN1	312226	3	3	6	GDNGDTACSNEIGVGVSK	R	A	0.997	98.2	25	19.1	98.2	0	3	0	0	2	1780.77	3979.36	4864540	1542	1559
Mudpit_Aged L3 4 Anterior NP IAF	Fibrillin-1 OS=Homo sapiens GN=FBN1 PE=1 SV=3	P35555	FBN1	312226	3	3	6	YLIESGNEDGFFK	R	I	0.997	50.7	25	16.2	50.7	0	1	0	0	2	1518.71	7668	8544360	2793	2805
Mudpit_Aged L3 4 Anterior NP IAF	Histidine-rich glycoprotein OS=Homo sapiens GN=HRG PE=1 SV=1	P04196	HRG	59576.6	9	12	39	ADLFYDVEALDLESPK	R	N	0.997	87.9	26.6	18.5	87.9	0	3	2	0	2	1824.89	9190.91	149053000	220	235
Mudpit_Aged L3 4 Anterior NP IAF	Histidine-rich glycoprotein OS=Homo sapiens GN=HRG PE=1 SV=1	P04196	HRG	59576.6	9	12	39	DGYLFQLLR	R	I	0.997	52.2	26.5	16.3	52.2	0	2	0	0	2	1124.61	9249.9	110320000	44	52
Mudpit_Aged L3 4 Anterior NP IAF	Histidine-rich glycoprotein OS=Homo sapiens GN=HRG PE=1 SV=1	P04196	HRG	59576.6	9	12	39	DSPVLIDFFEDTER	K	Y	0.997	81.2	25.4	18.1	81.2	0	5	1	0	2	1682.79	9323.5	512204000	140	153
Mudpit_Aged L3 4 Anterior NP IAF	Histidine-rich glycoprotein OS=Homo sapiens GN=HRG PE=1 SV=1	P04196	HRG	59576.6	9	12	39	EENDDFASFR	K	V	0.997	37.6	25	15.3	37.6	0	2	0	0	2	1229.51	5377.17	22314500	167	176
Mudpit_Aged L3 4 Anterior NP IAF	Histidine-rich glycoprotein OS=Homo sapiens GN=HRG PE=1 SV=1	P04196	HRG	59576.6	9	12	39	GEVLPLPEANFPSFPLPHHK	K	H	0.964	36.8	25.6	15.3	36.8	0	0	0	2	2	2226.17	9670.21	7622370	467	486
Mudpit_Aged L3 4 Anterior NP IAF	Histidine-rich glycoprotein OS=Homo sapiens GN=HRG PE=1 SV=1	P04196	HRG	59576.6	9	12	39	GGEGTGYFVDFSVR	R	N	0.997	93	25	18.8	93	0	4	0	0	2	1490.69	8037.14	66230700	188	201
Mudpit_Aged L3 4 Anterior NP IAF	Histidine-rich glycoprotein OS=Homo sapiens GN=HRG PE=1 SV=1	P04196	HRG	59576.6	9	12	39	SGFPQVSMFFTHTFPK	K	-	0.987	40.5	26.3	15.5	40.5	0	0	1	0	2	1857.9	9447.3	5956770	510	525
Mudpit_Aged L3 4 Anterior NP IAF	Histidine-rich glycoprotein OS=Homo sapiens GN=HRG PE=1 SV=1	P04196	HRG	59576.6	9	12	39	YKEENDDFASFR	K	V	0.997	78.4	25	17.9	78.4	0	11	3	0	2	1520.67	6703.19	110938000	165	176
Mudpit_Aged L3 4 Anterior NP IAF	Histidine-rich glycoprotein OS=Homo sapiens GN=HRG PE=1 SV=1	P04196	HRG	59576.6	9	12	39	YWNDCEPPDSR	K	R	0.997	36.8	25	15.3	36.8	0	3	0	0	2	1439.55	4017.31	22380600	85	95
Mudpit_Aged L3 4 Anterior NP IAF	Mannosyl-oligosaccharide 1,2-alpha-mannosidase IA OS=Homo sapiens GN=MAN1A1 PE=1 SV=3	P33908	MAN1A1	72971.7	2	2	4	FDGGVEAIATR	R	Q	0.997	70.4	26.6	21.6	66.2	0	3	0	0	2	1135.57	4801.1	27376300	526	536
Mudpit_Aged L3 4 Anterior NP IAF	Mannosyl-oligosaccharide 1,2-alpha-mannosidase IA OS=Homo sapiens GN=MAN1A1 PE=1 SV=3	P33908	MAN1A1	72971.7	2	2	4	SSSGLTYIAEWK	K	G	0.997	63.8	26.2	17	63.8	0	1	0	0	2	1341.67	7267.04	7864220	452	463
Mudpit_Aged L3 4 Anterior NP IAF	Phosphatidylcholine-sterol acyltransferase (Fragment) OS=Homo sapiens GN=LCAT PE=1 SV=1	A0A140VK24_HUMAN,J3QSE5,P04180	LCAT	49579	2	2	2	ITTTSPWMFPSR	R	M	0.973	30	27.5	14.9	30	0	1	0	0	2	1423.7	7526.93	9784080	269	280
Mudpit_Aged L3 4 Anterior NP IAF	Phosphatidylcholine-sterol acyltransferase (Fragment) OS=Homo sapiens GN=LCAT PE=1 SV=1	A0A140VK24_HUMAN,J3QSE5,P04180	LCAT	49579	2	2	2	LEPGQQEEYYR	R	K	0.997	51.6	25	16.2	51.6	0	1	0	0	2	1411.65	3519.66	2592380	172	182
Mudpit_Aged L3 4 Anterior NP IAF	cDNA FLJ78207, highly similar to Human complement protein component C7 mRNA OS=Homo sapiens PE=2 SV=1	A8K2T4,P10643	C7	93516.6	9	12	31	DGFVQDEGTMFPVGK	K	N	0.997	51.8	25	16.2	51.8	0	4	0	0	2	1626.75	7855.9	10991700	579	593
Mudpit_Aged L3 4 Anterior NP IAF	cDNA FLJ78207, highly similar to Human complement protein component C7 mRNA OS=Homo sapiens PE=2 SV=1	A8K2T4,P10643	C7	93516.6	9	12	31	ELSHLPSLYDYSAYR	K	R	0.997	76.5	26.3	17.8	76.5	0	2	5	0	2	1813.88	9273.97	84243800	279	293
Mudpit_Aged L3 4 Anterior NP IAF	cDNA FLJ78207, highly similar to Human complement protein component C7 mRNA OS=Homo sapiens PE=2 SV=1	A8K2T4,P10643	C7	93516.6	9	12	31	GGGAGFISGLSYLELDNPAGNK	R	R	0.997	78	26.8	17.9	78	0	1	1	0	2	2137.06	9212.96	21589900	379	400
Mudpit_Aged L3 4 Anterior NP IAF	cDNA FLJ78207, highly similar to Human complement protein component C7 mRNA OS=Homo sapiens PE=2 SV=1	A8K2T4,P10643	C7	93516.6	9	12	31	LIDQYGTHYLQSGSLGGEYR	R	V	0.997	122	25.5	20.6	122	0	4	2	0	2	2257.09	8621.76	102946000	295	314
Mudpit_Aged L3 4 Anterior NP IAF	cDNA FLJ78207, highly similar to Human complement protein component C7 mRNA OS=Homo sapiens PE=2 SV=1	A8K2T4,P10643	C7	93516.6	9	12	31	LSGNVLSYTFQVK	R	I	0.997	57.7	25.8	16.6	57.7	0	1	0	0	2	1455.78	7930.76	7770470	179	191
Mudpit_Aged L3 4 Anterior NP IAF	cDNA FLJ78207, highly similar to Human complement protein component C7 mRNA OS=Homo sapiens PE=2 SV=1	A8K2T4,P10643	C7	93516.6	9	12	31	LTPLYELVK	K	E	0.997	43.7	25	15.7	43.7	0	4	0	0	2	1075.64	8675.35	63369100	421	429
Mudpit_Aged L3 4 Anterior NP IAF	cDNA FLJ78207, highly similar to Human complement protein component C7 mRNA OS=Homo sapiens PE=2 SV=1	A8K2T4,P10643	C7	93516.6	9	12	31	SSGWHFVVK	K	F	0.997	51.9	26.2	24.5	43.7	0	2	0	0	2	1046.54	7836	14855100	339	347
Mudpit_Aged L3 4 Anterior NP IAF	cDNA FLJ78207, highly similar to Human complement protein component C7 mRNA OS=Homo sapiens PE=2 SV=1	A8K2T4,P10643	C7	93516.6	9	12	31	VLFYVDSEK	R	L	0.997	52.6	25	16.3	52.6	0	3	0	0	2	1099.57	6430.97	37342500	315	323
Mudpit_Aged L3 4 Anterior NP IAF	cDNA FLJ78207, highly similar to Human complement protein component C7 mRNA OS=Homo sapiens PE=2 SV=1	A8K2T4,P10643	C7	93516.6	9	12	31	YSAWAESVTNLPQVIK	R	Q	0.997	81	27.2	18.1	81	0	2	0	0	2	1805.94	9043.53	69780400	403	418
Mudpit_Aged L3 4 Anterior NP IAF	HCG2043253, isoform CRA_a OS=Homo sapiens GN=hCG_2043253 PE=4 SV=1	A0A024R0P1,B4DXV6,Q16674,W4VSR3	MIA,MIA-RAB4B,hCG_2043253	14509.2	2	2	5	GQVVYVFSK	R	L	0.997	40.5	25	15.5	40.5	0	3	0	0	2	1026.56	5571.55	21063300	67	75
Mudpit_Aged L3 4 Anterior NP IAF	HCG2043253, isoform CRA_a OS=Homo sapiens GN=hCG_2043253 PE=4 SV=1	A0A024R0P1,B4DXV6,Q16674,W4VSR3	MIA,MIA-RAB4B,hCG_2043253	14509.2	2	2	5	LFWGGSVQGDYYGDLAAR	R	L	0.997	98.1	25.1	19.1	98.1	0	2	0	0	2	1974.93	9004.22	8385830	82	99
Mudpit_Aged L3 4 Anterior NP IAF	Glyceraldehyde-3-phosphate dehydrogenase OS=Homo sapiens GN=GAPDH PE=1 SV=3	P04406,V9HVZ4	GAPDH,HEL-S-162eP	36053.4	7	11	19	GALQNIIPASTGAAK	R	A	0.99	30.1	25	14.9	30.1	0	2	0	0	2	1411.79	6137.15	8275910	201	215
Mudpit_Aged L3 4 Anterior NP IAF	Glyceraldehyde-3-phosphate dehydrogenase OS=Homo sapiens GN=GAPDH PE=1 SV=3	P04406,V9HVZ4	GAPDH,HEL-S-162eP	36053.4	7	11	19	IISNASCTTNCLAPLAK	K	V	0.997	86.6	26.4	18.4	86.6	0	2	0	0	2	1835.89	6049.77	4031150	146	162
Mudpit_Aged L3 4 Anterior NP IAF	Glyceraldehyde-3-phosphate dehydrogenase OS=Homo sapiens GN=GAPDH PE=1 SV=3	P04406,V9HVZ4	GAPDH,HEL-S-162eP	36053.4	7	11	19	LISWYDNEFGYSNR	K	V	0.997	77.9	25	17.9	77.9	0	2	1	0	2	1763.8	8723.97	28176900	310	323
Mudpit_Aged L3 4 Anterior NP IAF	Glyceraldehyde-3-phosphate dehydrogenase OS=Homo sapiens GN=GAPDH PE=1 SV=3	P04406,V9HVZ4	GAPDH,HEL-S-162eP	36053.4	7	11	19	LVINGNPITIFQER	K	D	0.997	73.6	25	17.6	73.6	0	2	0	0	2	1613.9	9025.63	32539600	67	80
Mudpit_Aged L3 4 Anterior NP IAF	Glyceraldehyde-3-phosphate dehydrogenase OS=Homo sapiens GN=GAPDH PE=1 SV=3	P04406,V9HVZ4	GAPDH,HEL-S-162eP	36053.4	7	11	19	VIISAPSADAPMFVMGVNHEK	R	Y	0.99	54.7	26.2	16.4	54.7	0	0	6	0	2	2213.11	9045.15	104426000	119	139
Mudpit_Aged L3 4 Anterior NP IAF	Glyceraldehyde-3-phosphate dehydrogenase OS=Homo sapiens GN=GAPDH PE=1 SV=3	P04406,V9HVZ4	GAPDH,HEL-S-162eP	36053.4	7	11	19	VVDLMAHMASK	R	-	0.984	45.6	26.3	15.9	11.9	0	0	2	0	2	1217.6	5130.99	7451900	324	334
Mudpit_Aged L3 4 Anterior NP IAF	Glyceraldehyde-3-phosphate dehydrogenase OS=Homo sapiens GN=GAPDH PE=1 SV=3	P04406,V9HVZ4	GAPDH,HEL-S-162eP	36053.4	7	11	19	WGDAGAEYVVESTGVFTTMEK	K	A	0.997	60.8	25	16.8	60.8	0	2	0	0	2	2293.03	8940.58	8722860	87	107
Mudpit_Aged L3 4 Anterior NP IAF	Peptidyl-prolyl cis-trans isomerase OS=Homo sapiens PE=2 SV=1	A8K2Q6,P45877	PPIC	22763.5	2	2	2	IVIGLFGK	R	V	0.99	47.3	25	21.7	41.5	0	1	0	0	2	846.545	7544.01	7023910	54	61
Mudpit_Aged L3 4 Anterior NP IAF	Peptidyl-prolyl cis-trans isomerase OS=Homo sapiens PE=2 SV=1	A8K2Q6,P45877	PPIC	22763.5	2	2	2	TVENFVALATGEK	K	G	0.997	43.3	27.4	15.7	43.3	0	1	0	0	2	1378.72	7739.75	8230490	66	78
Mudpit_Aged L3 4 Anterior NP IAF	Protein disulfide-isomerase A6 OS=Homo sapiens GN=PDIA6 PE=1 SV=1	Q15084	PDIA6	48122.3	3	3	3	GESPVDYDGGR	K	T	0.997	50.1	25	16.1	50.1	0	1	0	0	2	1151.5	2685.73	7724510	246	256
Mudpit_Aged L3 4 Anterior NP IAF	Protein disulfide-isomerase A6 OS=Homo sapiens GN=PDIA6 PE=1 SV=1	Q15084	PDIA6	48122.3	3	3	3	GSFSEQGINEFLR	K	E	0.997	47	25.3	15.9	47	0	1	0	0	2	1483.72	7872.82	7826780	374	386
Mudpit_Aged L3 4 Anterior NP IAF	Protein disulfide-isomerase A6 OS=Homo sapiens GN=PDIA6 PE=1 SV=1	Q15084	PDIA6	48122.3	3	3	3	GSTAPVGGGAFPTIVER	R	E	0.997	52	27.7	16.3	52	0	1	0	0	2	1615.84	7258.82	2600440	393	409
Mudpit_Aged L3 4 Anterior NP IAF	Protein disulfide-isomerase OS=Homo sapiens PE=2 SV=1	B3KQT9,P30101,V9HVY3	HEL-S-269,PDIA3	56784.6	3	3	3	DGEEAGAYDGPR	R	T	0.997	55.3	25	16.5	55.3	0	1	0	0	2	1236.51	2424.13	6028030	108	119
Mudpit_Aged L3 4 Anterior NP IAF	Protein disulfide-isomerase OS=Homo sapiens PE=2 SV=1	B3KQT9,P30101,V9HVY3	HEL-S-269,PDIA3	56784.6	3	3	3	ELSDFISYLQR	R	E	0.997	40.3	26.1	15.5	40.3	0	1	0	0	2	1370.7	9120.01	18573100	472	482
Mudpit_Aged L3 4 Anterior NP IAF	Protein disulfide-isomerase OS=Homo sapiens PE=2 SV=1	B3KQT9,P30101,V9HVY3	HEL-S-269,PDIA3	56784.6	3	3	3	LAPEYEAAATR	R	L	0.997	41	27.7	17.9	38.7	0	1	0	0	2	1191.6	3279.67	4181080	63	73
Mudpit_Aged L3 4 Anterior NP IAF	Fibrinogen beta chain OS=Homo sapiens GN=FGB PE=1 SV=2	P02675,V9HVY1	FGB,HEL-S-78p	55928.6	21	48	344	AHYGGFTVQNEANK	K	Y	0.997	94.9	25	18.9	94.9	0	9	7	0	2	1535.72	4511.56	745517000	354	367
Mudpit_Aged L3 4 Anterior NP IAF	Fibrinogen beta chain OS=Homo sapiens GN=FGB PE=1 SV=2	P02675,V9HVY1	FGB,HEL-S-78p	55928.6	21	48	344	DNDGWLTSDPR	R	K	0.997	63.9	25	17	63.9	0	9	0	0	2	1275.56	5337.88	205290000	411	421
Mudpit_Aged L3 4 Anterior NP IAF	Fibrinogen beta chain OS=Homo sapiens GN=FGB PE=1 SV=2	P02675,V9HVY1	FGB,HEL-S-78p	55928.6	21	48	344	DNENVVNEYSSELEK	K	H	0.997	87.4	25	18.5	87.4	0	12	2	0	2	1768.79	6547	901908000	164	178
Mudpit_Aged L3 4 Anterior NP IAF	Fibrinogen beta chain OS=Homo sapiens GN=FGB PE=1 SV=2	P02675,V9HVY1	FGB,HEL-S-78p	55928.6	21	48	344	EDGGGWWYNR	K	C	0.997	65.9	25	17.1	65.9	0	14	0	0	2	1239.52	6196.71	470965000	427	436
Mudpit_Aged L3 4 Anterior NP IAF	Fibrinogen beta chain OS=Homo sapiens GN=FGB PE=1 SV=2	P02675,V9HVY1	FGB,HEL-S-78p	55928.6	21	48	344	EEAPSLRPAPPPISGGGYR	R	A	0.997	73.3	26.6	21.3	69.6	0	3	0	0	2	1951	5897.12	15739600	54	72
Mudpit_Aged L3 4 Anterior NP IAF	Fibrinogen beta chain OS=Homo sapiens GN=FGB PE=1 SV=2	P02675,V9HVY1	FGB,HEL-S-78p	55928.6	21	48	344	GGETSEMYLIQPDSSVKPYR	K	V	0.997	114	25.7	20.1	114	0	16	26	0	2	2257.08	7383.49	872094000	248	267
Mudpit_Aged L3 4 Anterior NP IAF	Fibrinogen beta chain OS=Homo sapiens GN=FGB PE=1 SV=2	P02675,V9HVY1	FGB,HEL-S-78p	55928.6	21	48	344	HGTDDGVVWMNWK	K	G	0.997	80.7	25	18	80.7	0	16	9	0	2	1544.7	9292.98	637385000	459	471
Mudpit_Aged L3 4 Anterior NP IAF	Fibrinogen beta chain OS=Homo sapiens GN=FGB PE=1 SV=2	P02675,V9HVY1	FGB,HEL-S-78p	55928.6	21	48	344	HQLYIDETVNSNIPTNLR	K	V	0.997	110	28	19.9	110	0	12	25	0	2	2127.08	8404.38	2456540000	179	196
Mudpit_Aged L3 4 Anterior NP IAF	Fibrinogen beta chain OS=Homo sapiens GN=FGB PE=1 SV=2	P02675,V9HVY1	FGB,HEL-S-78p	55928.6	21	48	344	IRPFFPQQ	K	-	0.968	30.8	27.7	14.9	30.8	0	2	0	0	2	1032.56	6321.79	106908000	484	491
Mudpit_Aged L3 4 Anterior NP IAF	Fibrinogen beta chain OS=Homo sapiens GN=FGB PE=1 SV=2	P02675,V9HVY1	FGB,HEL-S-78p	55928.6	21	48	344	KGGETSEMYLIQPDSSVKPYR	R	V	0.995	39.8	26.5	15.5	39.8	0	1	2	2	2	2401.17	6575.89	167415000	247	267
Mudpit_Aged L3 4 Anterior NP IAF	Fibrinogen beta chain OS=Homo sapiens GN=FGB PE=1 SV=2	P02675,V9HVY1	FGB,HEL-S-78p	55928.6	21	48	344	LESDVSAQMEYCR	K	T	0.997	38.8	25	15.4	38.8	0	1	0	0	2	1604.66	3807.85	2520330	212	224
Mudpit_Aged L3 4 Anterior NP IAF	Fibrinogen beta chain OS=Homo sapiens GN=FGB PE=1 SV=2	P02675,V9HVY1	FGB,HEL-S-78p	55928.6	21	48	344	MGPTELLIEMEDWK	R	G	0.997	136	25	21.5	136	0	33	19	0	2	1707.8	8605.73	1864030000	335	348
Mudpit_Aged L3 4 Anterior NP IAF	Fibrinogen beta chain OS=Homo sapiens GN=FGB PE=1 SV=2	P02675,V9HVY1	FGB,HEL-S-78p	55928.6	21	48	344	MGPTELLIEMEDWKGDK	R	V	0.997	67.3	28.6	17.2	67.3	0	0	2	0	2	2007.94	9162.58	45636200	335	351
Mudpit_Aged L3 4 Anterior NP IAF	Fibrinogen beta chain OS=Homo sapiens GN=FGB PE=1 SV=2	P02675,V9HVY1	FGB,HEL-S-78p	55928.6	21	48	344	NSVDELNNNVEAVSQTSSSSFQYMYLLK	R	D	0.997	132	25	21.2	132	0	0	6	1	2	3167.48	9132.6	96014800	125	152
Mudpit_Aged L3 4 Anterior NP IAF	Fibrinogen beta chain OS=Homo sapiens GN=FGB PE=1 SV=2	P02675,V9HVY1	FGB,HEL-S-78p	55928.6	21	48	344	NYCGLPGEYWLGNDK	K	I	0.997	51.5	25	16.2	51.5	0	9	0	0	2	1786.77	8752.76	107835000	314	328
Mudpit_Aged L3 4 Anterior NP IAF	Fibrinogen beta chain OS=Homo sapiens GN=FGB PE=1 SV=2	P02675,V9HVY1	FGB,HEL-S-78p	55928.6	21	48	344	QDGSVDFGR	R	K	0.997	69.4	25	22.6	64.2	0	3	0	0	2	980.443	2838.7	20266800	286	294
Mudpit_Aged L3 4 Anterior NP IAF	Fibrinogen beta chain OS=Homo sapiens GN=FGB PE=1 SV=2	P02675,V9HVY1	FGB,HEL-S-78p	55928.6	21	48	344	QGFGNVATNTDGK	K	N	0.997	87.4	25.5	18.5	87.4	0	14	0	0	2	1308.62	2864.85	1457840000	301	313
Mudpit_Aged L3 4 Anterior NP IAF	Fibrinogen beta chain OS=Homo sapiens GN=FGB PE=1 SV=2	P02675,V9HVY1	FGB,HEL-S-78p	55928.6	21	48	344	QVKDNENVVNEYSSELEK	K	H	0.997	107	25.1	19.7	107	0	1	1	0	2	2124.01	7486.45	11045600	161	178
Mudpit_Aged L3 4 Anterior NP IAF	Fibrinogen beta chain OS=Homo sapiens GN=FGB PE=1 SV=2	P02675,V9HVY1	FGB,HEL-S-78p	55928.6	21	48	344	TMTIHNGMFFSTYDR	R	D	0.989	43.6	25	15.7	43.6	0	0	3	0	2	1820.81	8338.45	24719200	396	410
Mudpit_Aged L3 4 Anterior NP IAF	Fibrinogen beta chain OS=Homo sapiens GN=FGB PE=1 SV=2	P02675,V9HVY1	FGB,HEL-S-78p	55928.6	21	48	344	VYCDMNTENGGWTVIQNR	R	Q	0.997	94.6	25	18.9	94.6	0	30	12	0	2	2157.93	6494.7	586905000	268	285
Mudpit_Aged L3 4 Anterior NP IAF	Fibrinogen beta chain OS=Homo sapiens GN=FGB PE=1 SV=2	P02675,V9HVY1	FGB,HEL-S-78p	55928.6	21	48	344	YYWGGQYTWDMAK	R	H	0.997	70.9	25	17.4	70.9	0	40	2	0	2	1668.72	8327.01	860222000	446	458
Mudpit_Aged L3 4 Anterior NP IAF	14-3-3 protein epsilon OS=Homo sapiens GN=YWHAE PE=1 SV=1	P62258,V9HW98	HEL2,YWHAE	29175	4	4	4	AAFDDAIAELDTLSEESYK	K	D	0.997	93.6	25	18.8	93.6	0	1	0	0	2	2087.97	9282.12	3914170	197	215
Mudpit_Aged L3 4 Anterior NP IAF	14-3-3 protein epsilon OS=Homo sapiens GN=YWHAE PE=1 SV=1	P62258,V9HW98	HEL2,YWHAE	29175	4	4	4	DSTLIMQLLR	K	D	0.997	44.7	26.2	17.4	43.1	0	1	0	0	2	1189.66	9258	15137500	216	225
Mudpit_Aged L3 4 Anterior NP IAF	14-3-3 protein epsilon OS=Homo sapiens GN=YWHAE PE=1 SV=1	P62258,V9HW98	HEL2,YWHAE	29175	4	4	4	EAAENSLVAYK	K	A	0.996	40.5	27.9	15.5	40.5	0	1	0	0	2	1194.6	4047.2	7423650	143	153
Mudpit_Aged L3 4 Anterior NP IAF	14-3-3 protein epsilon OS=Homo sapiens GN=YWHAE PE=1 SV=1	P62258,V9HW98	HEL2,YWHAE	29175	4	4	4	NLLSVAYK	R	N	0.99	34.6	25.4	31	18.8	0	1	0	0	2	907.525	6159.72	9087410	43	50
Mudpit_Aged L3 4 Anterior NP IAF	Periostin, osteoblast specific factor, isoform CRA_c OS=Homo sapiens GN=POSTN PE=4 SV=1	A0A024RDS2,Q15063	POSTN	93318	12	13	18	AAAITSDILEALGR	R	D	0.997	113	27.2	21.7	111	0	1	0	0	2	1400.77	9331.91	63920300	252	265
Mudpit_Aged L3 4 Anterior NP IAF	Periostin, osteoblast specific factor, isoform CRA_c OS=Homo sapiens GN=POSTN PE=4 SV=1	A0A024RDS2,Q15063	POSTN	93318	12	13	18	DGHFTLFAPTNEAFEK	R	L	0.997	57.9	25	16.6	57.9	0	1	0	0	2	1823.86	8415.99	5197840	266	281
Mudpit_Aged L3 4 Anterior NP IAF	Periostin, osteoblast specific factor, isoform CRA_c OS=Homo sapiens GN=POSTN PE=4 SV=1	A0A024RDS2,Q15063	POSTN	93318	12	13	18	EGETITEVIHGEPIIK	K	K	0.997	85.8	26.3	18.4	85.8	0	2	0	0	2	1764.94	8944.24	7296770	716	731
Mudpit_Aged L3 4 Anterior NP IAF	Periostin, osteoblast specific factor, isoform CRA_c OS=Homo sapiens GN=POSTN PE=4 SV=1	A0A024RDS2,Q15063	POSTN	93318	12	13	18	ELLTQPGDWTLFVPTNDAFK	K	G	0.997	55.3	26.9	16.5	55.3	0	1	0	0	2	2292.16	9368.25	14365600	523	542
Mudpit_Aged L3 4 Anterior NP IAF	Periostin, osteoblast specific factor, isoform CRA_c OS=Homo sapiens GN=POSTN PE=4 SV=1	A0A024RDS2,Q15063	POSTN	93318	12	13	18	FIEGGDGHLFEDEEIK	K	R	0.984	39.8	25.1	15.5	39.8	0	0	1	0	2	1834.85	7854.02	4599940	790	805
Mudpit_Aged L3 4 Anterior NP IAF	Periostin, osteoblast specific factor, isoform CRA_c OS=Homo sapiens GN=POSTN PE=4 SV=1	A0A024RDS2,Q15063	POSTN	93318	12	13	18	FSTFLSLLEAADLK	R	E	0.997	93.7	25	18.9	93.7	0	1	0	0	2	1554.84	9474.14	6253820	509	522
Mudpit_Aged L3 4 Anterior NP IAF	Periostin, osteoblast specific factor, isoform CRA_c OS=Homo sapiens GN=POSTN PE=4 SV=1	A0A024RDS2,Q15063	POSTN	93318	12	13	18	IEGEPEFR	K	L	0.99	54.8	26	28.1	43.2	0	1	0	0	2	976.473	4119.91	9916540	705	712
Mudpit_Aged L3 4 Anterior NP IAF	Periostin, osteoblast specific factor, isoform CRA_c OS=Homo sapiens GN=POSTN PE=4 SV=1	A0A024RDS2,Q15063	POSTN	93318	12	13	18	ISTGGGETEETLKK	R	L	0.991	46.6	27.9	15.9	46.6	0	0	3	0	2	1449.74	3167.22	13169900	765	778
Mudpit_Aged L3 4 Anterior NP IAF	Periostin, osteoblast specific factor, isoform CRA_c OS=Homo sapiens GN=POSTN PE=4 SV=1	A0A024RDS2,Q15063	POSTN	93318	12	13	18	LLQEEVTK	K	V	0.99	45.6	28	22.3	39.1	0	1	0	0	2	959.541	2744	8668970	779	786
Mudpit_Aged L3 4 Anterior NP IAF	Periostin, osteoblast specific factor, isoform CRA_c OS=Homo sapiens GN=POSTN PE=4 SV=1	A0A024RDS2,Q15063	POSTN	93318	12	13	18	LLYPADTPVGNDQLLEILNK	K	L	0.997	82.2	25.8	18.1	82.2	0	3	1	0	2	2226.2	9255.21	38339800	627	646
Mudpit_Aged L3 4 Anterior NP IAF	Periostin, osteoblast specific factor, isoform CRA_c OS=Homo sapiens GN=POSTN PE=4 SV=1	A0A024RDS2,Q15063	POSTN	93318	12	13	18	QVIELAGK	K	Q	0.99	66.7	27.3	32.7	51.1	0	1	0	0	2	857.509	3390.1	9535860	372	379
Mudpit_Aged L3 4 Anterior NP IAF	Periostin, osteoblast specific factor, isoform CRA_c OS=Homo sapiens GN=POSTN PE=4 SV=1	A0A024RDS2,Q15063	POSTN	93318	12	13	18	VGLNELYNGQILETIGGK	K	Q	0.997	87	25.9	18.4	87	0	1	0	0	2	1918.03	9170.7	6780830	438	455
Mudpit_Aged L3 4 Anterior NP IAF	DnaJ (Hsp40) homolog, subfamily C, member 3 OS=Homo sapiens GN=DNAJC3 PE=2 SV=1	A8KA82,Q13217	DNAJC3	57582.2	3	3	3	AALPDLTK	K	V	0.99	36.1	25	15.3	36.1	0	1	0	0	2	828.483	4345.26	7215510	89	96
Mudpit_Aged L3 4 Anterior NP IAF	DnaJ (Hsp40) homolog, subfamily C, member 3 OS=Homo sapiens GN=DNAJC3 PE=2 SV=1	A8KA82,Q13217	DNAJC3	57582.2	3	3	3	EVLSDPEMR	K	K	0.965	27.3	25	14.7	27.3	0	1	0	0	2	1075.51	4123.23	2844160	447	455
Mudpit_Aged L3 4 Anterior NP IAF	DnaJ (Hsp40) homolog, subfamily C, member 3 OS=Homo sapiens GN=DNAJC3 PE=2 SV=1	A8KA82,Q13217	DNAJC3	57582.2	3	3	3	ISTLYYQLGDHELSLSEVR	K	E	0.993	51.3	26.7	16.2	51.3	0	0	1	0	2	2223.13	9329.17	9460880	228	246
Mudpit_Aged L3 4 Anterior NP IAF	Peroxiredoxin-1 (Fragment) OS=Homo sapiens GN=PRDX1 PE=1 SV=1	A0A0A0MSI0,Q06830	PRDX1	22110.9	7	8	14	ADEGISFR	K	G	0.99	40.5	26.8	15.5	40.5	0	3	0	0	2	894.432	3874.24	33617800	121	128
Mudpit_Aged L3 4 Anterior NP IAF	Peroxiredoxin-1 (Fragment) OS=Homo sapiens GN=PRDX1 PE=1 SV=1	A0A0A0MSI0,Q06830	PRDX1	22110.9	7	8	14	ATAVMPDGQFK	K	D	0.997	41.8	25	15.6	41.8	0	2	0	0	2	1180.57	3558.19	19312200	17	27
Mudpit_Aged L3 4 Anterior NP IAF	Peroxiredoxin-1 (Fragment) OS=Homo sapiens GN=PRDX1 PE=1 SV=1	A0A0A0MSI0,Q06830	PRDX1	22110.9	7	8	14	GLFIIDDK	R	G	0.99	37.7	26.1	15.4	37.7	0	3	0	0	2	920.509	7025.88	31146000	129	136
Mudpit_Aged L3 4 Anterior NP IAF	Peroxiredoxin-1 (Fragment) OS=Homo sapiens GN=PRDX1 PE=1 SV=1	A0A0A0MSI0,Q06830	PRDX1	22110.9	7	8	14	LVQAFQFTDK	R	H	0.997	49.4	25.1	16.1	49.4	0	1	0	0	2	1196.63	6514.87	9336950	159	168
Mudpit_Aged L3 4 Anterior NP IAF	Peroxiredoxin-1 (Fragment) OS=Homo sapiens GN=PRDX1 PE=1 SV=1	A0A0A0MSI0,Q06830	PRDX1	22110.9	7	8	14	QGGLGPMNIPLVSDPK	K	R	0.997	48.2	26.8	16	48.2	0	1	0	0	2	1622.86	8765.8	1419850	94	109
Mudpit_Aged L3 4 Anterior NP IAF	Peroxiredoxin-1 (Fragment) OS=Homo sapiens GN=PRDX1 PE=1 SV=1	A0A0A0MSI0,Q06830	PRDX1	22110.9	7	8	14	QITVNDLPVGR	R	S	0.997	55.5	26.2	16.5	55.5	0	2	0	0	2	1211.67	5539.31	27070300	141	151
Mudpit_Aged L3 4 Anterior NP IAF	Peroxiredoxin-1 (Fragment) OS=Homo sapiens GN=PRDX1 PE=1 SV=1	A0A0A0MSI0,Q06830	PRDX1	22110.9	7	8	14	TIAQDYGVLK	R	A	0.997	58.9	26.2	16.7	58.9	0	2	0	0	2	1107.6	5518.2	17992700	111	120
Mudpit_Aged L3 4 Anterior NP IAF	cDNA, FLJ94534, highly similar to Homo sapiens capping protein (actin filament), gelsolin-like(CAPG), mRNA OS=Homo sapiens PE=2 SV=1	B2R9S4,B4DU58,P40121,V9HW69	CAPG,HEL-S-66	38498.9	2	2	2	EGNPEEDLTADK	K	A	0.997	77.3	25	17.8	77.3	0	1	0	0	2	1317.58	3070.88	3755900	232	243
Mudpit_Aged L3 4 Anterior NP IAF	cDNA, FLJ94534, highly similar to Homo sapiens capping protein (actin filament), gelsolin-like(CAPG), mRNA OS=Homo sapiens PE=2 SV=1	B2R9S4,B4DU58,P40121,V9HW69	CAPG,HEL-S-66	38498.9	2	2	2	VSDATGQMNLTK	K	V	0.972	28.2	25.4	14.8	28.2	0	1	0	0	2	1264.62	3215.02	4699910	254	265
Mudpit_Aged L3 4 Anterior NP IAF	Epididymis luminal protein 214 OS=Homo sapiens GN=HEL-214 PE=2 SV=1	V9HW68	HEL-214	51714.4	2	3	3	ALPAPIEK	K	T	0.99	47.9	25	16	47.9	0	12	0	0	2	838.503	3615.09	2567190000	350	357
Mudpit_Aged L3 4 Anterior NP IAF	Epididymis luminal protein 214 OS=Homo sapiens GN=HEL-214 PE=2 SV=1	V9HW68	HEL-214	51714.4	2	3	3	EPQVYTLPPSR	R	D	0.997	62.3	26.6	16.9	62.3	0	25	7	0	2	1286.67	4756.52	5275100000	368	378
Mudpit_Aged L3 4 Anterior NP IAF	Epididymis luminal protein 214 OS=Homo sapiens GN=HEL-214 PE=2 SV=1	V9HW68	HEL-214	51714.4	2	3	3	FNWYVDGVEVHNAK	K	T	0.997	66.2	28.7	17.1	66.2	0	11	21	0	2	1677.8	9030.53	2282930000	298	311
Mudpit_Aged L3 4 Anterior NP IAF	Epididymis luminal protein 214 OS=Homo sapiens GN=HEL-214 PE=2 SV=1	V9HW68	HEL-214	51714.4	2	3	3	GFYPSDIAVEWESNGQPENNYK	K	T	0.997	78.9	25	17.9	78.9	0	4	4	0	2	2544.13	8962.18	195128000	394	415
Mudpit_Aged L3 4 Anterior NP IAF	Epididymis luminal protein 214 OS=Homo sapiens GN=HEL-214 PE=2 SV=1	V9HW68	HEL-214	51714.4	2	3	3	GLEWVANIK	K	Q	0.976	33.3	28	15.1	33.3	0	1	0	0	2	1029.57	8013.7	6192240	63	71
Mudpit_Aged L3 4 Anterior NP IAF	Epididymis luminal protein 214 OS=Homo sapiens GN=HEL-214 PE=2 SV=1	V9HW68	HEL-214	51714.4	2	3	3	GPSVFPLAPSSK	K	S	0.997	55.2	26.6	16.5	55.2	0	10	0	0	2	1186.65	6466.29	989874000	145	156
Mudpit_Aged L3 4 Anterior NP IAF	Epididymis luminal protein 214 OS=Homo sapiens GN=HEL-214 PE=2 SV=1	V9HW68	HEL-214	51714.4	2	3	3	NQVSLTCLVK	K	G	0.997	40.9	26.9	15.6	40.9	0	3	0	0	2	1162.61	6928.51	51625800	384	393
Mudpit_Aged L3 4 Anterior NP IAF	Epididymis luminal protein 214 OS=Homo sapiens GN=HEL-214 PE=2 SV=1	V9HW68	HEL-214	51714.4	2	3	3	NSLYLQMNSLR	K	A	0.997	37.8	26.9	41.6	11.6	0	2	0	0	2	1338.68	6720.29	6887140	96	106
Mudpit_Aged L3 4 Anterior NP IAF	Epididymis luminal protein 214 OS=Homo sapiens GN=HEL-214 PE=2 SV=1	V9HW68	HEL-214	51714.4	2	3	3	STSGGTAALGCLVK	K	D	0.997	71.1	28	17.4	71.1	0	6	0	0	2	1322.66	5905.67	44113400	157	170
Mudpit_Aged L3 4 Anterior NP IAF	Epididymis luminal protein 214 OS=Homo sapiens GN=HEL-214 PE=2 SV=1	V9HW68	HEL-214	51714.4	2	3	3	TPEVTCVVVDVSHEDPEVK	R	F	0.997	95.6	25.8	19	95.6	0	1	1	0	2	2140.01	8432.46	72522600	279	297
Mudpit_Aged L3 4 Anterior NP IAF	Epididymis luminal protein 214 OS=Homo sapiens GN=HEL-214 PE=2 SV=1	V9HW68	HEL-214	51714.4	2	3	3	TTPPVLDSDGSFFLYSK	K	L	0.997	125	26.1	20.8	125	0	22	4	0	2	1873.92	9116.74	1729960000	416	432
Mudpit_Aged L3 4 Anterior NP IAF	Epididymis luminal protein 214 OS=Homo sapiens GN=HEL-214 PE=2 SV=1	V9HW68	HEL-214	51714.4	2	3	3	VVSVLTVLHQDWLNGK	R	E	0.997	80.4	25	18	80.4	0	1	1	0	2	1808.01	9442.08	370000000	325	340
Mudpit_Aged L3 4 Anterior NP IAF	Fibromodulin, isoform CRA_a OS=Homo sapiens GN=FMOD PE=4 SV=1	A0A024R971,Q06828	FMOD	43180.4	8	14	51	ELHLDHNQISR	R	V	0.997	58.9	28.5	21.1	54.4	0	5	6	0	2	1361.69	4997.51	578997000	180	190
Mudpit_Aged L3 4 Anterior NP IAF	Fibromodulin, isoform CRA_a OS=Homo sapiens GN=FMOD PE=4 SV=1	A0A024R971,Q06828	FMOD	43180.4	8	14	51	INEFSISSFCTVVDVVNFSK	R	L	0.997	72.7	27.9	17.5	72.7	0	3	0	0	2	2293.11	9506.54	12644800	325	344
Mudpit_Aged L3 4 Anterior NP IAF	Fibromodulin, isoform CRA_a OS=Homo sapiens GN=FMOD PE=4 SV=1	A0A024R971,Q06828	FMOD	43180.4	8	14	51	IPPVNTNLENLYLQGNR	K	I	0.997	117	25.6	20.3	117	0	9	8	0	2	1955.03	8362.91	1128780000	308	324
Mudpit_Aged L3 4 Anterior NP IAF	Fibromodulin, isoform CRA_a OS=Homo sapiens GN=FMOD PE=4 SV=1	A0A024R971,Q06828	FMOD	43180.4	8	14	51	KVPDGLPSALEQLYMEHNNVYTVPDSYFR	R	G	0.978	47.6	25.5	16	47.6	0	0	1	8	2	3398.64	9862.67	41550500	237	265
Mudpit_Aged L3 4 Anterior NP IAF	Fibromodulin, isoform CRA_a OS=Homo sapiens GN=FMOD PE=4 SV=1	A0A024R971,Q06828	FMOD	43180.4	8	14	51	LYLDHNNLTR	R	M	0.997	63.6	26.6	19.5	61.1	0	1	2	0	2	1258.65	4923.59	91898700	160	169
Mudpit_Aged L3 4 Anterior NP IAF	Fibromodulin, isoform CRA_a OS=Homo sapiens GN=FMOD PE=4 SV=1	A0A024R971,Q06828	FMOD	43180.4	8	14	51	SLILLDLSYNHLR	R	K	0.997	76.9	25	24	70.7	0	2	2	0	2	1556.88	9331.55	97199600	224	236
Mudpit_Aged L3 4 Anterior NP IAF	Fibromodulin, isoform CRA_a OS=Homo sapiens GN=FMOD PE=4 SV=1	A0A024R971,Q06828	FMOD	43180.4	8	14	51	VPDGLPSALEQLYMEHNNVYTVPDSYFR	K	G	0.971	39.3	25.3	15.5	39.3	0	0	1	0	2	3254.55	9617.38	18994700	238	265
Mudpit_Aged L3 4 Anterior NP IAF	Fibromodulin, isoform CRA_a OS=Homo sapiens GN=FMOD PE=4 SV=1	A0A024R971,Q06828	FMOD	43180.4	8	14	51	YLPFVPSR	K	M	0.985	31.8	26.6	17.2	29.6	0	3	0	0	2	978.541	6723.84	49165000	99	106
Mudpit_Aged L3 4 Anterior NP IAF	Annexin OS=Homo sapiens GN=ANXA2 PE=3 SV=1	A0A024R5Z7,P07355,V9HW65	ANXA2,HEL-S-270	38606.1	11	15	20	AEDGSVIDYELIDQDAR	R	D	0.997	118	25	20.4	118	0	2	1	0	2	1908.88	7834.69	9344350	180	196
Mudpit_Aged L3 4 Anterior NP IAF	Annexin OS=Homo sapiens GN=ANXA2 PE=3 SV=1	A0A024R5Z7,P07355,V9HW65	ANXA2,HEL-S-270	38606.1	11	15	20	AYTNFDAER	K	D	0.997	60	25	16.7	60	0	1	0	0	2	1086.48	3274.71	32775100	29	37
Mudpit_Aged L3 4 Anterior NP IAF	Annexin OS=Homo sapiens GN=ANXA2 PE=3 SV=1	A0A024R5Z7,P07355,V9HW65	ANXA2,HEL-S-270	38606.1	11	15	20	DALNIETAIK	R	T	0.99	36.5	29.9	15.3	36.5	0	1	0	0	2	1087.6	6341.65	11192000	38	47
Mudpit_Aged L3 4 Anterior NP IAF	Annexin OS=Homo sapiens GN=ANXA2 PE=3 SV=1	A0A024R5Z7,P07355,V9HW65	ANXA2,HEL-S-270	38606.1	11	15	20	DIISDTSGDFR	K	K	0.997	59.3	25	16.7	59.3	0	1	0	0	2	1225.57	6061.72	20060400	158	168
Mudpit_Aged L3 4 Anterior NP IAF	Annexin OS=Homo sapiens GN=ANXA2 PE=3 SV=1	A0A024R5Z7,P07355,V9HW65	ANXA2,HEL-S-270	38606.1	11	15	20	GVDEVTIVNILTNR	K	S	0.997	71.6	25.1	17.5	71.6	0	2	2	0	2	1542.85	9242	58902600	50	63
Mudpit_Aged L3 4 Anterior NP IAF	Annexin OS=Homo sapiens GN=ANXA2 PE=3 SV=1	A0A024R5Z7,P07355,V9HW65	ANXA2,HEL-S-270	38606.1	11	15	20	QDIAFAYQR	R	R	0.997	51.3	27.4	16.9	50.6	0	1	0	0	2	1111.55	4751.29	15383400	69	77
Mudpit_Aged L3 4 Anterior NP IAF	Annexin OS=Homo sapiens GN=ANXA2 PE=3 SV=1	A0A024R5Z7,P07355,V9HW65	ANXA2,HEL-S-270	38606.1	11	15	20	RAEDGSVIDYELIDQDAR	R	D	0.997	69.5	25.4	17.3	69.5	0	1	2	0	2	2064.98	8988.1	20202800	179	196
Mudpit_Aged L3 4 Anterior NP IAF	Annexin OS=Homo sapiens GN=ANXA2 PE=3 SV=1	A0A024R5Z7,P07355,V9HW65	ANXA2,HEL-S-270	38606.1	11	15	20	SLYYYIQQDTK	K	G	0.997	37.9	26.1	15.4	37.9	0	2	0	0	2	1421.69	6585.46	8860930	314	324
Mudpit_Aged L3 4 Anterior NP IAF	Annexin OS=Homo sapiens GN=ANXA2 PE=3 SV=1	A0A024R5Z7,P07355,V9HW65	ANXA2,HEL-S-270	38606.1	11	15	20	SYSPYDMLESIR	K	K	0.997	47.6	25	16	47.6	0	2	0	0	2	1460.67	7638.85	30542200	234	245
Mudpit_Aged L3 4 Anterior NP IAF	Annexin OS=Homo sapiens GN=ANXA2 PE=3 SV=1	A0A024R5Z7,P07355,V9HW65	ANXA2,HEL-S-270	38606.1	11	15	20	TDLEKDIISDTSGDFR	K	K	0.997	76.6	30.3	17.8	76.6	0	1	0	0	2	1811.87	9067.08	5851880	153	168
Mudpit_Aged L3 4 Anterior NP IAF	Annexin OS=Homo sapiens GN=ANXA2 PE=3 SV=1	A0A024R5Z7,P07355,V9HW65	ANXA2,HEL-S-270	38606.1	11	15	20	TNQELQEINR	R	V	0.997	62.3	25.3	16.9	62.3	0	1	0	0	2	1244.62	2953.01	8423240	136	145
Mudpit_Aged L3 4 Anterior NP IAF	Peroxiredoxin-4 OS=Homo sapiens GN=PRDX4 PE=1 SV=1	Q13162,V9HW63	HEL-S-97n,PRDX4	30541.1	2	2	2	GLFIIDDK	R	G	0.99	37.7	26.1	15.4	37.7	0	3	0	0	2	920.509	7025.88	31146000	201	208
Mudpit_Aged L3 4 Anterior NP IAF	Peroxiredoxin-4 OS=Homo sapiens GN=PRDX4 PE=1 SV=1	Q13162,V9HW63	HEL-S-97n,PRDX4	30541.1	2	2	2	IPLLSDLTHQISK	R	D	0.987	54.1	25	16.4	54.1	0	0	1	0	2	1464.84	9332.04	6191550	174	186
Mudpit_Aged L3 4 Anterior NP IAF	Peroxiredoxin-4 OS=Homo sapiens GN=PRDX4 PE=1 SV=1	Q13162,V9HW63	HEL-S-97n,PRDX4	30541.1	2	2	2	LVQAFQYTDK	R	H	0.997	68.1	25	17.3	68.1	0	1	0	0	2	1212.63	4695.94	6019660	231	240
Mudpit_Aged L3 4 Anterior NP IAF	Immunoglobulin kappa light chain OS=Homo sapiens PE=1 SV=1	IGK_HUMAN		0	3	6	24	ASSLESGVPSR	?	?	0.997	64.9	27.7	22.9	59.1	0	2	0	0	2	1089.55	2602.11	4179540	0	0
Mudpit_Aged L3 4 Anterior NP IAF	Immunoglobulin kappa light chain OS=Homo sapiens PE=1 SV=1	IGK_HUMAN		0	3	6	24	DIQMTQSPSTLSASVGDR	?	?	0.997	123	25	20.7	123	0	15	4	0	2	1908.9	5598.93	138021000	0	0
Mudpit_Aged L3 4 Anterior NP IAF	Immunoglobulin kappa light chain OS=Homo sapiens PE=1 SV=1	IGK_HUMAN		0	3	6	24	DSTYSLSSTLTLSK	K	A	0.997	98.8	26.1	19.2	98.8	0	80	4	0	2	1502.76	7284.91	2580790000	0	0
Mudpit_Aged L3 4 Anterior NP IAF	Immunoglobulin kappa light chain OS=Homo sapiens PE=1 SV=1	IGK_HUMAN		0	3	6	24	GTVAAPSVFIFPPSDEQLK	?	?	0.997	66	25.4	17.1	66	0	3	0	0	2	2003.05	9100.3	43028000	0	0
Mudpit_Aged L3 4 Anterior NP IAF	Immunoglobulin kappa light chain OS=Homo sapiens PE=1 SV=1	IGK_HUMAN		0	3	6	24	SGTASVVCLLNNFYPR	K	E	0.997	120	26.9	20.5	120	0	15	0	0	2	1798.88	9159.74	328819000	0	0
Mudpit_Aged L3 4 Anterior NP IAF	Immunoglobulin kappa light chain OS=Homo sapiens PE=1 SV=1	IGK_HUMAN		0	3	6	24	VDNALQSGNSQESVTEQDSK	K	D	0.997	131	25	21.2	131	0	22	25	0	2	2135.97	2803.21	3208750000	0	0
Mudpit_Aged L3 4 Anterior NP IAF	Immunoglobulin kappa light chain OS=Homo sapiens PE=1 SV=1	IGK_HUMAN		0	3	6	24	VDNALQSGNSQESVTEQDSKDSTYSLSSTLTLSK	K	A	0.997	81.3	25	18.1	81.3	0	0	8	0	2	3619.71	7781.45	16313900	0	0
Mudpit_Aged L3 4 Anterior NP IAF	Immunoglobulin kappa light chain OS=Homo sapiens PE=1 SV=1	IGK_HUMAN		0	3	6	24	VQWKVDNALQSGNSQESVTEQDSK	K	D	0.997	93.8	25	18.9	93.8	0	0	2	0	2	2677.27	6166.92	12001300	0	0
Mudpit_Aged L3 4 Anterior NP IAF	Immunoglobulin kappa light chain OS=Homo sapiens PE=1 SV=1	IGK_HUMAN		0	3	6	24	VYACEVTHQGLSSPVTK	K	S	0.997	68	26.1	17.2	68	0	3	2	0	2	1876.91	5512.2	27944400	0	0
Mudpit_Aged L3 4 Anterior NP IAF	Annexin A4 OS=Homo sapiens GN=ANXA4 PE=1 SV=4	P09525,Q6LES2,Q6P452,V9HW59	ANXA4,HEL-S-274	35884.3	2	2	2	DEGNYLDDALVR	R	Q	0.997	60	25	16.7	60	0	1	0	0	2	1379.64	7081.75	6287870	161	172
Mudpit_Aged L3 4 Anterior NP IAF	Annexin A4 OS=Homo sapiens GN=ANXA4 PE=1 SV=4	P09525,Q6LES2,Q6P452,V9HW59	ANXA4,HEL-S-274	35884.3	2	2	2	SDTSFMFQR	R	V	0.979	27.3	25	14.7	27.3	0	1	0	0	2	1134.49	4266.51	3671140	142	150
Mudpit_Aged L3 4 Anterior NP IAF	Tropomyosin alpha-4 chain OS=Homo sapiens GN=TPM4 PE=1 SV=3	P67936,V9HW56	HEL-S-108,TPM4	28522.4	2	2	2	AEGDVAALNR	K	R	0.997	54.3	25.4	21.3	49.3	0	1	0	0	2	1015.52	2689.37	4058860	45	54
Mudpit_Aged L3 4 Anterior NP IAF	Tropomyosin alpha-4 chain OS=Homo sapiens GN=TPM4 PE=1 SV=3	P67936,V9HW56	HEL-S-108,TPM4	28522.4	2	2	2	IQALQQQADEAEDR	K	A	0.997	90.9	25.8	18.7	90.9	0	1	0	0	2	1614.77	3882.48	3715850	14	27
Mudpit_Aged L3 4 Anterior NP IAF	Angiotensinogen (Serpin peptidase inhibitor, clade A, member 8) OS=Homo sapiens GN=AGT PE=3 SV=1	B0ZBE2,B4E1B3,P01019,Q53GY3,Q53YY1,Q59EP2,Q86U78	AGT	53154.8	5	7	13	ALQDQLVLVAAK	K	L	0.997	72	25	17.5	72	0	4	0	0	2	1268.76	7057.03	71497300	83	94
Mudpit_Aged L3 4 Anterior NP IAF	Angiotensinogen (Serpin peptidase inhibitor, clade A, member 8) OS=Homo sapiens GN=AGT PE=3 SV=1	B0ZBE2,B4E1B3,P01019,Q53GY3,Q53YY1,Q59EP2,Q86U78	AGT	53154.8	5	7	13	DPTFIPAPIQAK	K	T	0.997	48	26	16	48	0	3	0	0	2	1297.72	7171.46	71288100	64	75
Mudpit_Aged L3 4 Anterior NP IAF	Angiotensinogen (Serpin peptidase inhibitor, clade A, member 8) OS=Homo sapiens GN=AGT PE=3 SV=1	B0ZBE2,B4E1B3,P01019,Q53GY3,Q53YY1,Q59EP2,Q86U78	AGT	53154.8	5	7	13	QPFVQGLALYTPVVLPR	K	S	0.997	48.3	25	16	48.3	0	1	1	0	2	1898.09	9206.34	95837000	221	237
Mudpit_Aged L3 4 Anterior NP IAF	Angiotensinogen (Serpin peptidase inhibitor, clade A, member 8) OS=Homo sapiens GN=AGT PE=3 SV=1	B0ZBE2,B4E1B3,P01019,Q53GY3,Q53YY1,Q59EP2,Q86U78	AGT	53154.8	5	7	13	SLDFTELDVAAEK	R	I	0.997	80.4	30	18	80.4	0	2	0	0	2	1437.71	7901.7	94917400	238	250
Mudpit_Aged L3 4 Anterior NP IAF	Angiotensinogen (Serpin peptidase inhibitor, clade A, member 8) OS=Homo sapiens GN=AGT PE=3 SV=1	B0ZBE2,B4E1B3,P01019,Q53GY3,Q53YY1,Q59EP2,Q86U78	AGT	53154.8	5	7	13	VLSALQAVQGLLVAQGR	K	A	0.997	112	25	20	112	0	1	1	0	2	1723.02	9276.8	78611300	180	196
Mudpit_Aged L3 4 Anterior NP IAF	Heat shock protein beta-1 OS=Homo sapiens GN=HSPB1 PE=1 SV=2	P04792,V9HW43	HEL-S-102,HSPB1	22782.6	3	3	3	DGVVEITGK	K	H	0.996	39.2	27.6	15.4	39.2	0	1	0	0	2	917.494	3416.46	2739030	115	123
Mudpit_Aged L3 4 Anterior NP IAF	Heat shock protein beta-1 OS=Homo sapiens GN=HSPB1 PE=1 SV=2	P04792,V9HW43	HEL-S-102,HSPB1	22782.6	3	3	3	GPSWDPFR	R	D	0.951	23.8	25	14.5	23.8	0	1	0	0	2	961.453	8122.67	3195020	13	20
Mudpit_Aged L3 4 Anterior NP IAF	Heat shock protein beta-1 OS=Homo sapiens GN=HSPB1 PE=1 SV=2	P04792,V9HW43	HEL-S-102,HSPB1	22782.6	3	3	3	LATQSNEITIPVTFESR	K	A	0.997	49.4	26.8	16.1	49.4	0	1	0	0	2	1905.99	8397.37	1153020	172	188
Mudpit_Aged L3 4 Anterior NP IAF	Alpha B crystallin OS=Homo sapiens GN=CRYAB PE=2 SV=1	A0A140G961_HUMAN,C3VMY8,E9PR44,P02511,V9HW27	CRYAB,HEL-S-101	20159.5	2	2	3	APSWFDTGLSEMR	R	L	0.997	50.9	25	16.2	50.9	0	2	0	0	2	1512.68	7730.99	5186980	57	69
Mudpit_Aged L3 4 Anterior NP IAF	Alpha B crystallin OS=Homo sapiens GN=CRYAB PE=2 SV=1	A0A140G961_HUMAN,C3VMY8,E9PR44,P02511,V9HW27	CRYAB,HEL-S-101	20159.5	2	2	3	VLGDVIEVHGK	K	H	0.985	44	25.6	15.7	44	0	0	1	0	2	1165.66	5207.82	6972230	93	103
Mudpit_Aged L3 4 Anterior NP IAF	cDNA FLJ38781 fis, clone LIVER2000216, highly similar to HEAT SHOCK COGNATE 71 kDa PROTEIN OS=Homo sapiens PE=2 SV=1	B3KTV0,P11142,V9HW22	HEL-S-72p,HSPA8	70899.8	4	4	4	DAGTIAGLNVLR	K	I	0.973	28.1	25.7	14.8	28.1	0	1	0	0	2	1199.67	7671.75	4835290	160	171
Mudpit_Aged L3 4 Anterior NP IAF	cDNA FLJ38781 fis, clone LIVER2000216, highly similar to HEAT SHOCK COGNATE 71 kDa PROTEIN OS=Homo sapiens PE=2 SV=1	B3KTV0,P11142,V9HW22	HEL-S-72p,HSPA8	70899.8	4	4	4	EIAEAYLGK	K	T	0.997	52	27.7	23	45.2	0	1	0	0	2	993.525	4567.56	8679000	129	137
Mudpit_Aged L3 4 Anterior NP IAF	cDNA FLJ38781 fis, clone LIVER2000216, highly similar to HEAT SHOCK COGNATE 71 kDa PROTEIN OS=Homo sapiens PE=2 SV=1	B3KTV0,P11142,V9HW22	HEL-S-72p,HSPA8	70899.8	4	4	4	FEELNADLFR	R	G	0.997	64.2	26.7	17	64.2	0	1	0	0	2	1253.62	7761.37	13825100	302	311
Mudpit_Aged L3 4 Anterior NP IAF	cDNA FLJ38781 fis, clone LIVER2000216, highly similar to HEAT SHOCK COGNATE 71 kDa PROTEIN OS=Homo sapiens PE=2 SV=1	B3KTV0,P11142,V9HW22	HEL-S-72p,HSPA8	70899.8	4	4	4	IINEPTAAAIAYGLDK	R	K	0.997	38.6	26.8	15.4	38.6	0	1	0	0	2	1659.9	8407.45	16959300	172	187
Mudpit_Aged L3 4 Anterior NP IAF	cDNA FLJ38781 fis, clone LIVER2000216, highly similar to HEAT SHOCK COGNATE 71 kDa PROTEIN OS=Homo sapiens PE=2 SV=1	B3KTV0,P11142,V9HW22	HEL-S-72p,HSPA8	70899.8	4	4	4	TTPSYVAFTDTER	R	L	0.997	39.5	25	15.5	39.5	0	1	0	0	2	1487.7	5626.74	3376140	37	49
Mudpit_Aged L3 4 Anterior NP IAF	cDNA FLJ60461, highly similar to Peroxiredoxin-2 (EC 1.11.1.15) OS=Homo sapiens PE=2 SV=1	B4DF70,P32119,V9HW12	HEL-S-2a,PRDX2	21892.4	2	2	2	ATAVVDGAFK	K	E	0.997	48.4	27.9	16	48.4	0	1	0	0	2	978.525	3977.28	6347820	17	26
Mudpit_Aged L3 4 Anterior NP IAF	cDNA FLJ60461, highly similar to Peroxiredoxin-2 (EC 1.11.1.15) OS=Homo sapiens PE=2 SV=1	B4DF70,P32119,V9HW12	HEL-S-2a,PRDX2	21892.4	2	2	2	EGGLGPLNIPLLADVTR	K	R	0.997	74.8	25	17.7	74.8	0	1	0	0	2	1734.98	9443.57	17806200	93	109
Mudpit_Aged L3 4 Anterior NP IAF	cDNA FLJ60461, highly similar to Peroxiredoxin-2 (EC 1.11.1.15) OS=Homo sapiens PE=2 SV=1	B4DF70,P32119,V9HW12	HEL-S-2a,PRDX2	21892.4	2	2	2	QITVNDLPVGR	R	S	0.997	55.5	26.2	16.5	55.5	0	2	0	0	2	1211.67	5539.31	27070300	140	150
Mudpit_Aged L3 4 Anterior NP IAF	Nuclear envelope protein okuribin OS=Homo sapiens GN=okuribin PE=2 SV=1	A3KC71,Q76M96	CCDC80,okuribin	108176	18	27	81	ASGVEGQVVAEGNDGGGGAGRPSLGSEK	K	K	0.993	54.7	26.5	16.4	54.7	0	0	4	0	2	2542.21	4826.82	34891800	283	310
Mudpit_Aged L3 4 Anterior NP IAF	Nuclear envelope protein okuribin OS=Homo sapiens GN=okuribin PE=2 SV=1	A3KC71,Q76M96	CCDC80,okuribin	108176	18	27	81	EDVPAHLVK	R	D	0.966	27.3	27.1	14.7	27.3	0	1	0	0	2	1007.55	3988.36	3122910	843	851
Mudpit_Aged L3 4 Anterior NP IAF	Nuclear envelope protein okuribin OS=Homo sapiens GN=okuribin PE=2 SV=1	A3KC71,Q76M96	CCDC80,okuribin	108176	18	27	81	FPSGSSSPNILASFAGK	R	N	0.997	73.2	27.7	17.6	73.2	0	1	0	0	2	1666.84	8243.1	21084700	132	148
Mudpit_Aged L3 4 Anterior NP IAF	Nuclear envelope protein okuribin OS=Homo sapiens GN=okuribin PE=2 SV=1	A3KC71,Q76M96	CCDC80,okuribin	108176	18	27	81	HIQQIVLFHQAGEEGGK	R	V	0.997	89	27.6	18.6	89	0	0	2	0	2	1890.98	9333.87	34020100	183	199
Mudpit_Aged L3 4 Anterior NP IAF	Nuclear envelope protein okuribin OS=Homo sapiens GN=okuribin PE=2 SV=1	A3KC71,Q76M96	CCDC80,okuribin	108176	18	27	81	IDHFQLDNEKPMR	K	V	0.954	38	26.5	15.4	38	0	0	0	1	2	1642.8	6999.06	6962520	673	685
Mudpit_Aged L3 4 Anterior NP IAF	Nuclear envelope protein okuribin OS=Homo sapiens GN=okuribin PE=2 SV=1	A3KC71,Q76M96	CCDC80,okuribin	108176	18	27	81	ILSNEYEEK	K	Y	0.997	45.7	26.6	15.9	45.7	0	2	0	0	2	1124.55	2707.76	9707930	501	509
Mudpit_Aged L3 4 Anterior NP IAF	Nuclear envelope protein okuribin OS=Homo sapiens GN=okuribin PE=2 SV=1	A3KC71,Q76M96	CCDC80,okuribin	108176	18	27	81	ITSEGQILEQPLDPSLIPK	R	L	0.997	51.9	25	16.2	51.9	0	6	1	0	2	2078.14	9003.07	126969000	203	221
Mudpit_Aged L3 4 Anterior NP IAF	Nuclear envelope protein okuribin OS=Homo sapiens GN=okuribin PE=2 SV=1	A3KC71,Q76M96	CCDC80,okuribin	108176	18	27	81	LEAMYEVIDQGPIR	R	R	0.997	85.4	30.4	18.3	85.4	0	8	2	0	2	1633.83	7635.51	92916300	254	267
Mudpit_Aged L3 4 Anterior NP IAF	Nuclear envelope protein okuribin OS=Homo sapiens GN=okuribin PE=2 SV=1	A3KC71,Q76M96	CCDC80,okuribin	108176	18	27	81	LLLITAPK	R	A	0.99	61.5	25	16.8	61.5	0	3	0	0	2	868.587	6074.67	48157200	625	632
Mudpit_Aged L3 4 Anterior NP IAF	Nuclear envelope protein okuribin OS=Homo sapiens GN=okuribin PE=2 SV=1	A3KC71,Q76M96	CCDC80,okuribin	108176	18	27	81	NYFQVSPEYFSMLLVGK	R	D	0.997	67.3	26.5	17.2	67.3	0	2	0	0	2	2022	9433.67	13221800	855	871
Mudpit_Aged L3 4 Anterior NP IAF	Nuclear envelope protein okuribin OS=Homo sapiens GN=okuribin PE=2 SV=1	A3KC71,Q76M96	CCDC80,okuribin	108176	18	27	81	QEMAIQQSLGMR	R	C	0.997	66.8	25.9	17.2	64.5	0	5	0	0	2	1407.67	4421.95	31860600	901	912
Mudpit_Aged L3 4 Anterior NP IAF	Nuclear envelope protein okuribin OS=Homo sapiens GN=okuribin PE=2 SV=1	A3KC71,Q76M96	CCDC80,okuribin	108176	18	27	81	QSLENFLSR	K	F	0.997	65.8	26.5	17.1	65.8	0	3	0	0	2	1093.56	7326.2	21825100	766	774
Mudpit_Aged L3 4 Anterior NP IAF	Nuclear envelope protein okuribin OS=Homo sapiens GN=okuribin PE=2 SV=1	A3KC71,Q76M96	CCDC80,okuribin	108176	18	27	81	QYYEVPITMK	K	S	0.997	40.9	25	15.6	40.9	0	2	0	0	2	1271.63	6389.02	44796700	725	734
Mudpit_Aged L3 4 Anterior NP IAF	Nuclear envelope protein okuribin OS=Homo sapiens GN=okuribin PE=2 SV=1	A3KC71,Q76M96	CCDC80,okuribin	108176	18	27	81	STLEEPNLQPLQR	R	R	0.997	43.6	26.7	15.7	43.6	0	1	0	0	2	1524.8	5801.67	5811340	64	76
Mudpit_Aged L3 4 Anterior NP IAF	Nuclear envelope protein okuribin OS=Homo sapiens GN=okuribin PE=2 SV=1	A3KC71,Q76M96	CCDC80,okuribin	108176	18	27	81	SVADLLGSFEGK	K	R	0.997	78.8	26.9	17.9	78.8	0	6	0	0	2	1222.63	8951.43	147861000	611	622
Mudpit_Aged L3 4 Anterior NP IAF	Nuclear envelope protein okuribin OS=Homo sapiens GN=okuribin PE=2 SV=1	A3KC71,Q76M96	CCDC80,okuribin	108176	18	27	81	SVFDLIDTFQSR	K	I	0.997	69.2	26.4	17.3	69.2	0	3	2	0	2	1427.72	9273.83	287855000	735	746
Mudpit_Aged L3 4 Anterior NP IAF	Nuclear envelope protein okuribin OS=Homo sapiens GN=okuribin PE=2 SV=1	A3KC71,Q76M96	CCDC80,okuribin	108176	18	27	81	VVDDEDLVDQR	R	L	0.997	90.5	25	18.7	90.5	0	21	0	0	2	1302.62	3701.47	199676000	686	696
Mudpit_Aged L3 4 Anterior NP IAF	Nuclear envelope protein okuribin OS=Homo sapiens GN=okuribin PE=2 SV=1	A3KC71,Q76M96	CCDC80,okuribin	108176	18	27	81	VWVISAPHASEGYYR	R	L	0.997	55.7	25.7	16.5	55.7	0	3	2	0	2	1734.86	8914.48	104408000	151	165
Mudpit_Aged L3 4 Anterior NP IAF	Histone H4 OS=Homo sapiens GN=HIST1H4J PE=2 SV=1	B2R4R0,P62805,Q0VAS5	HIST1H4A,HIST1H4H,HIST1H4J	11367.7	4	5	8	DNIQGITKPAIR	R	R	0.959	30	25	14.9	30	0	0	1	0	2	1325.75	4622.07	13309800	25	36
Mudpit_Aged L3 4 Anterior NP IAF	Histone H4 OS=Homo sapiens GN=HIST1H4J PE=2 SV=1	B2R4R0,P62805,Q0VAS5	HIST1H4A,HIST1H4H,HIST1H4J	11367.7	4	5	8	ISGLIYEETR	R	G	0.997	51.4	26.8	16.2	51.4	0	1	0	0	2	1180.62	5159.17	6790700	47	56
Mudpit_Aged L3 4 Anterior NP IAF	Histone H4 OS=Homo sapiens GN=HIST1H4J PE=2 SV=1	B2R4R0,P62805,Q0VAS5	HIST1H4A,HIST1H4H,HIST1H4J	11367.7	4	5	8	TVTAMDVVYALK	K	R	0.997	64.4	25.5	17	64.4	0	5	0	0	2	1326.7	8960.89	62342300	81	92
Mudpit_Aged L3 4 Anterior NP IAF	Histone H4 OS=Homo sapiens GN=HIST1H4J PE=2 SV=1	B2R4R0,P62805,Q0VAS5	HIST1H4A,HIST1H4H,HIST1H4J	11367.7	4	5	8	VFLENVIR	K	D	0.953	26	25.8	14.9	25.7	0	1	0	0	2	989.578	7575.27	17370200	61	68
Mudpit_Aged L3 4 Anterior NP IAF	Pigment epithelium-derived factor OS=Homo sapiens GN=SERPINF1 PE=1 SV=4	A0A140VKF3_HUMAN,P36955	SERPINF1	46314.3	11	14	49	ALYYDLISSPDIHGTYK	R	E	0.997	73.1	27	17.6	73.1	0	2	3	0	2	1955.98	9107.01	76154500	107	123
Mudpit_Aged L3 4 Anterior NP IAF	Pigment epithelium-derived factor OS=Homo sapiens GN=SERPINF1 PE=1 SV=4	A0A140VKF3_HUMAN,P36955	SERPINF1	46314.3	11	14	49	DTDTGALLFIGK	R	I	0.997	74.5	26.6	17.7	74.5	0	7	0	0	2	1250.66	8339.39	62395800	400	411
Mudpit_Aged L3 4 Anterior NP IAF	Pigment epithelium-derived factor OS=Homo sapiens GN=SERPINF1 PE=1 SV=4	A0A140VKF3_HUMAN,P36955	SERPINF1	46314.3	11	14	49	ELLDTVTAPQK	K	N	0.997	77.3	27.7	17.8	77.3	0	5	0	0	2	1214.66	4749.24	55084000	124	134
Mudpit_Aged L3 4 Anterior NP IAF	Pigment epithelium-derived factor OS=Homo sapiens GN=SERPINF1 PE=1 SV=4	A0A140VKF3_HUMAN,P36955	SERPINF1	46314.3	11	14	49	LAAAVSNFGYDLYR	K	V	0.997	84.2	26.6	18.3	84.2	0	3	0	0	2	1559.79	8422.22	30109300	54	67
Mudpit_Aged L3 4 Anterior NP IAF	Pigment epithelium-derived factor OS=Homo sapiens GN=SERPINF1 PE=1 SV=4	A0A140VKF3_HUMAN,P36955	SERPINF1	46314.3	11	14	49	LDLQEINNWVQAQMK	R	G	0.997	58.9	27	16.7	58.9	0	3	1	0	2	1845.92	9284.71	73714500	175	189
Mudpit_Aged L3 4 Anterior NP IAF	Pigment epithelium-derived factor OS=Homo sapiens GN=SERPINF1 PE=1 SV=4	A0A140VKF3_HUMAN,P36955	SERPINF1	46314.3	11	14	49	LQSLFDSPDFSK	K	I	0.997	74.8	25.8	17.7	74.8	0	8	0	0	2	1383.68	7783.09	52508100	334	345
Mudpit_Aged L3 4 Anterior NP IAF	Pigment epithelium-derived factor OS=Homo sapiens GN=SERPINF1 PE=1 SV=4	A0A140VKF3_HUMAN,P36955	SERPINF1	46314.3	11	14	49	LSYEGEVTK	K	S	0.997	53	26.9	16.9	52.4	0	4	0	0	2	1025.52	3052.72	42591000	319	327
Mudpit_Aged L3 4 Anterior NP IAF	Pigment epithelium-derived factor OS=Homo sapiens GN=SERPINF1 PE=1 SV=4	A0A140VKF3_HUMAN,P36955	SERPINF1	46314.3	11	14	49	SSFVAPLEK	K	S	0.997	48	28	16	48	0	3	0	0	2	977.53	4779.47	112917000	152	160
Mudpit_Aged L3 4 Anterior NP IAF	Pigment epithelium-derived factor OS=Homo sapiens GN=SERPINF1 PE=1 SV=4	A0A140VKF3_HUMAN,P36955	SERPINF1	46314.3	11	14	49	SSTSPTTNVLLSPLSVATALSALSLGAEQR	R	T	0.997	92.7	25	18.8	92.7	0	0	1	0	2	2971.59	9565.12	3853380	70	99
Mudpit_Aged L3 4 Anterior NP IAF	Pigment epithelium-derived factor OS=Homo sapiens GN=SERPINF1 PE=1 SV=4	A0A140VKF3_HUMAN,P36955	SERPINF1	46314.3	11	14	49	TSLEDFYLDEER	K	T	0.997	86.5	25	18.4	86.5	0	6	0	0	2	1516.68	7798.03	108234000	226	237
Mudpit_Aged L3 4 Anterior NP IAF	Pigment epithelium-derived factor OS=Homo sapiens GN=SERPINF1 PE=1 SV=4	A0A140VKF3_HUMAN,P36955	SERPINF1	46314.3	11	14	49	TVQAVLTVPK	K	L	0.997	55.2	25	16.5	55.2	0	3	0	0	2	1055.65	5478.54	58523900	307	316
Mudpit_Aged L3 4 Anterior NP IAF	Uncharacterized protein OS=Homo sapiens PE=1 SV=1	A8K008		51595.7	11	17	134	ALPAPIEK	K	T	0.99	47.9	25	16	47.9	0	12	0	0	2	838.503	3615.09	2567190000	352	359
Mudpit_Aged L3 4 Anterior NP IAF	Uncharacterized protein OS=Homo sapiens PE=1 SV=1	A8K008		51595.7	11	17	134	EPQVYTLPPSR	R	D	0.997	62.3	26.6	16.9	62.3	0	25	7	0	2	1286.67	4756.52	5275100000	370	380
Mudpit_Aged L3 4 Anterior NP IAF	Uncharacterized protein OS=Homo sapiens PE=1 SV=1	A8K008		51595.7	11	17	134	FNWYVDGVEVHNAK	K	T	0.997	66.2	28.7	17.1	66.2	0	11	21	0	2	1677.8	9030.53	2282930000	300	313
Mudpit_Aged L3 4 Anterior NP IAF	Uncharacterized protein OS=Homo sapiens PE=1 SV=1	A8K008		51595.7	11	17	134	GFYPSDIAVEWESNGQPENNYK	K	T	0.997	78.9	25	17.9	78.9	0	4	4	0	2	2544.13	8962.18	195128000	396	417
Mudpit_Aged L3 4 Anterior NP IAF	Uncharacterized protein OS=Homo sapiens PE=1 SV=1	A8K008		51595.7	11	17	134	GPSVFPLAPSSK	K	S	0.997	55.2	26.6	16.5	55.2	0	10	0	0	2	1186.65	6466.29	989874000	147	158
Mudpit_Aged L3 4 Anterior NP IAF	Uncharacterized protein OS=Homo sapiens PE=1 SV=1	A8K008		51595.7	11	17	134	NQVSLTCLVK	K	G	0.997	40.9	26.9	15.6	40.9	0	3	0	0	2	1162.61	6928.51	51625800	386	395
Mudpit_Aged L3 4 Anterior NP IAF	Uncharacterized protein OS=Homo sapiens PE=1 SV=1	A8K008		51595.7	11	17	134	STSGGTAALGCLVK	K	D	0.997	71.1	28	17.4	71.1	0	6	0	0	2	1322.66	5905.67	44113400	159	172
Mudpit_Aged L3 4 Anterior NP IAF	Uncharacterized protein OS=Homo sapiens PE=1 SV=1	A8K008		51595.7	11	17	134	TDGGTTDYAAPVK	K	G	0.993	32.9	25	15.1	32.9	0	1	0	0	2	1295.61	2686.18	3790610	74	86
Mudpit_Aged L3 4 Anterior NP IAF	Uncharacterized protein OS=Homo sapiens PE=1 SV=1	A8K008		51595.7	11	17	134	TPEVTCVVVDVSHEDPEVK	R	F	0.997	95.6	25.8	19	95.6	0	1	1	0	2	2140.01	8432.46	72522600	281	299
Mudpit_Aged L3 4 Anterior NP IAF	Uncharacterized protein OS=Homo sapiens PE=1 SV=1	A8K008		51595.7	11	17	134	TTPPVLDSDGSFFLYSK	K	L	0.997	125	26.1	20.8	125	0	22	4	0	2	1873.92	9116.74	1729960000	418	434
Mudpit_Aged L3 4 Anterior NP IAF	Uncharacterized protein OS=Homo sapiens PE=1 SV=1	A8K008		51595.7	11	17	134	VVSVLTVLHQDWLNGK	R	E	0.997	80.4	25	18	80.4	0	1	1	0	2	1808.01	9442.08	370000000	327	342
Mudpit_Aged L3 4 Anterior NP IAF	EGF containing fibulin-like extracellular matrix protein 1 isoform 2 (Fragment) OS=Homo sapiens GN=EFEMP1 PE=2 SV=1	A0A0S2Z3V1,A0A0S2Z4F1,A0A0U1RQV3,A8KAJ3,B4DWH0,Q12805,Q53TA7,Q59G97	EFEMP1	54639.1	4	5	6	EHIVDLEMLTVSSIGTFR	R	T	0.948	44.4	31.6	15.8	44.4	0	0	1	0	2	2063.05	9679.81	2355060	460	477
Mudpit_Aged L3 4 Anterior NP IAF	EGF containing fibulin-like extracellular matrix protein 1 isoform 2 (Fragment) OS=Homo sapiens GN=EFEMP1 PE=2 SV=1	A0A0S2Z3V1,A0A0S2Z4F1,A0A0U1RQV3,A8KAJ3,B4DWH0,Q12805,Q53TA7,Q59G97	EFEMP1	54639.1	4	5	6	QTSPVSAMLVLVK	R	S	0.997	52	28.2	16.3	52	0	1	0	0	2	1372.79	9055.16	29626700	441	453
Mudpit_Aged L3 4 Anterior NP IAF	EGF containing fibulin-like extracellular matrix protein 1 isoform 2 (Fragment) OS=Homo sapiens GN=EFEMP1 PE=2 SV=1	A0A0S2Z3V1,A0A0S2Z4F1,A0A0U1RQV3,A8KAJ3,B4DWH0,Q12805,Q53TA7,Q59G97	EFEMP1	54639.1	4	5	6	SGNENGEFYLR	K	Q	0.997	51.9	25	16.2	51.9	0	2	0	0	2	1285.58	4970.48	43294600	430	440
Mudpit_Aged L3 4 Anterior NP IAF	EGF containing fibulin-like extracellular matrix protein 1 isoform 2 (Fragment) OS=Homo sapiens GN=EFEMP1 PE=2 SV=1	A0A0S2Z3V1,A0A0S2Z4F1,A0A0U1RQV3,A8KAJ3,B4DWH0,Q12805,Q53TA7,Q59G97	EFEMP1	54639.1	4	5	6	SVPSDIFQIQATTIYANTINTFR	R	I	0.997	70	26.1	17.4	70	0	1	1	0	2	2600.34	9409.26	19266600	405	427
Mudpit_Aged L3 4 Anterior NP IAF	Beta-2-microglobulin OS=Homo sapiens PE=2 SV=1	B4E0X1,P61769	B2M	13714.9	2	4	6	VEHSDLSFSK	K	D	0.996	45.3	26.4	15.8	45.3	0	1	3	0	2	1148.56	4192.97	19289300	69	78
Mudpit_Aged L3 4 Anterior NP IAF	Beta-2-microglobulin OS=Homo sapiens PE=2 SV=1	B4E0X1,P61769	B2M	13714.9	2	4	6	VNHVTLSQPK	R	I	0.984	48.4	25.6	16	48.4	0	1	1	0	2	1122.63	4080.67	9524650	102	111
Mudpit_Aged L3 4 Anterior NP IAF	Collagen, type I, alpha 1, isoform CRA_a OS=Homo sapiens GN=COL1A1 PE=4 SV=1	D3DTX7	COL1A1	84740.7	2	4	12	ALLLQGSNEIEIR	K	A	0.997	77.8	25.3	20	75.7	0	1	0	0	2	1455.82	7380.45	16404100	808	820
Mudpit_Aged L3 4 Anterior NP IAF	Collagen, type I, alpha 1, isoform CRA_a OS=Homo sapiens GN=COL1A1 PE=4 SV=1	D3DTX7	COL1A1	84740.7	2	4	12	DGEAGAQGPPGPAGPAGER	K	G	0.997	116	25	20.3	116	0	4	1	0	2	1690.78	2594.34	47149000	34	52
Mudpit_Aged L3 4 Anterior NP IAF	Collagen, type I, alpha 1, isoform CRA_a OS=Homo sapiens GN=COL1A1 PE=4 SV=1	D3DTX7	COL1A1	84740.7	2	4	12	GESGPSGPAGPTGAR	K	G	0.997	52	25.1	16.3	52	0	1	0	0	2	1297.61	1817.2	781707	203	217
Mudpit_Aged L3 4 Anterior NP IAF	Collagen, type I, alpha 1, isoform CRA_a OS=Homo sapiens GN=COL1A1 PE=4 SV=1	D3DTX7	COL1A1	84740.7	2	4	12	GETGPAGPAGPVGPVGAR	R	G	0.997	93.1	30.5	18.8	93.1	0	5	2	0	2	1546.8	4082.74	67269900	488	505
Mudpit_Aged L3 4 Anterior NP IAF	Collagen, type I, alpha 1, isoform CRA_a OS=Homo sapiens GN=COL1A1 PE=4 SV=1	D3DTX7	COL1A1	84740.7	2	4	12	GFPGLPGPSGEPGK	R	Q	0.98	29.5	26.9	14.8	29.5	0	1	0	0	2	1296.66	6518.69	3075850	392	405
Mudpit_Aged L3 4 Anterior NP IAF	Collagen, type I, alpha 1, isoform CRA_a OS=Homo sapiens GN=COL1A1 PE=4 SV=1	D3DTX7	COL1A1	84740.7	2	4	12	GFSGLQGPPGPPGSPGEQGPSGASGPAGPR	R	G	0.997	90.8	25.9	18.7	90.8	0	1	2	0	2	2657.27	6343.23	6029710	533	562
Mudpit_Aged L3 4 Anterior NP IAF	Collagen, type I, alpha 1, isoform CRA_a OS=Homo sapiens GN=COL1A1 PE=4 SV=1	D3DTX7	COL1A1	84740.7	2	4	12	GPAGPQGPR	R	G	0.996	34	25	35.9	13.3	0	1	0	0	2	836.438	1528.52	465613	506	514
Mudpit_Aged L3 4 Anterior NP IAF	Collagen, type I, alpha 1, isoform CRA_a OS=Homo sapiens GN=COL1A1 PE=4 SV=1	D3DTX7	COL1A1	84740.7	2	4	12	GPPGPMGPPGLAGPPGESGR	R	E	0.997	70.9	26.2	17.4	70.9	0	4	1	0	2	1800.87	5238.14	46638700	416	435
Mudpit_Aged L3 4 Anterior NP IAF	Collagen, type I, alpha 1, isoform CRA_a OS=Homo sapiens GN=COL1A1 PE=4 SV=1	D3DTX7	COL1A1	84740.7	2	4	12	GVPGPPGAVGPAGK	R	D	0.997	68.8	26.8	17.5	68.6	0	4	0	0	2	1160.64	3601.61	28117800	20	33
Mudpit_Aged L3 4 Anterior NP IAF	Collagen, type I, alpha 1, isoform CRA_a OS=Homo sapiens GN=COL1A1 PE=4 SV=1	D3DTX7	COL1A1	84740.7	2	4	12	NSVAYMDQQTGNLK	K	K	0.996	37.6	25	15.3	37.6	0	1	0	0	2	1584.73	2678.05	4352710	793	806
Mudpit_Aged L3 4 Anterior NP IAF	Collagen, type I, alpha 1, isoform CRA_a OS=Homo sapiens GN=COL1A1 PE=4 SV=1	D3DTX7	COL1A1	84740.7	2	4	12	SGDRGETGPAGPAGPVGPVGAR	K	G	0.997	91.4	26.7	18.7	91.4	0	3	2	0	2	1961.98	4220.19	23839100	484	505
Mudpit_Aged L3 4 Anterior NP IAF	Collagen, type I, alpha 1, isoform CRA_a OS=Homo sapiens GN=COL1A1 PE=4 SV=1	D3DTX7	COL1A1	84740.7	2	4	12	SLSQQIENIR	K	S	0.997	58	27.4	16.6	58	0	1	0	0	2	1187.64	5172.59	18991100	658	667
Mudpit_Aged L3 4 Anterior NP IAF	Protein disulfide-isomerase A4 OS=Homo sapiens GN=ERP70 PE=3 SV=1	A0A090N8Y2,P13667	ERP70,PDIA4	72934	2	2	2	MDATANDVPSDR	K	Y	0.997	71.4	25	17.5	71.4	0	1	0	0	2	1291.56	2404.27	2081310	583	594
Mudpit_Aged L3 4 Anterior NP IAF	Protein disulfide-isomerase A4 OS=Homo sapiens GN=ERP70 PE=3 SV=1	A0A090N8Y2,P13667	ERP70,PDIA4	72934	2	2	2	VDATAETDLAK	K	R	0.997	69.3	25.4	17.3	69.3	0	1	0	0	2	1133.57	2914.73	4079450	235	245
Mudpit_Aged L3 4 Anterior NP IAF	Fms-related tyrosine kinase 1 (Vascular endothelial growth factor/vascular permeability factor receptor) OS=Homo sapiens GN=FLT1 PE=3 SV=1	A0A1W2PNW4_HUMAN,L7RSL3,P17948	FLT1	150774	4	4	6	MASTLVVADSR	K	I	0.997	60.4	27.1	16.8	60.4	0	1	0	0	2	1165.59	3066.02	2916690	518	528
Mudpit_Aged L3 4 Anterior NP IAF	Fms-related tyrosine kinase 1 (Vascular endothelial growth factor/vascular permeability factor receptor) OS=Homo sapiens GN=FLT1 PE=3 SV=1	A0A1W2PNW4_HUMAN,L7RSL3,P17948	FLT1	150774	4	4	6	MPTEGEDLK	K	L	0.997	53.2	25	16.6	53	0	2	0	0	2	1019.47	2675.74	9096080	566	574
Mudpit_Aged L3 4 Anterior NP IAF	Fms-related tyrosine kinase 1 (Vascular endothelial growth factor/vascular permeability factor receptor) OS=Homo sapiens GN=FLT1 PE=3 SV=1	A0A1W2PNW4_HUMAN,L7RSL3,P17948	FLT1	150774	4	4	6	NVYTGEEILQK	R	K	0.997	42.5	27.1	15.7	42.5	0	2	0	0	2	1293.67	5147.59	10078700	640	650
Mudpit_Aged L3 4 Anterior NP IAF	Fms-related tyrosine kinase 1 (Vascular endothelial growth factor/vascular permeability factor receptor) OS=Homo sapiens GN=FLT1 PE=3 SV=1	A0A1W2PNW4_HUMAN,L7RSL3,P17948	FLT1	150774	4	4	6	YLAVPTSK	K	K	0.99	40.5	25	15.5	40.5	0	1	0	0	2	878.498	3895.38	2972400	109	116
Mudpit_Aged L3 4 Anterior NP IAF	Stem cell growth factor; lymphocyte secreted C-type lectin OS=Homo sapiens PE=2 SV=1	Q5U0B9,Q9Y240	CLEC11A	35694.4	7	10	16	AALAPYNWPVWLGVHDR	R	R	0.984	40.6	26.7	15.5	40.6	0	0	1	0	2	1965.01	9420.89	15931600	229	245
Mudpit_Aged L3 4 Anterior NP IAF	Stem cell growth factor; lymphocyte secreted C-type lectin OS=Homo sapiens PE=2 SV=1	Q5U0B9,Q9Y240	CLEC11A	35694.4	7	10	16	DAVQALQEAQGR	R	A	0.997	84.8	25.4	32.6	70.5	0	3	1	0	2	1285.65	4532.83	133377000	155	166
Mudpit_Aged L3 4 Anterior NP IAF	Stem cell growth factor; lymphocyte secreted C-type lectin OS=Homo sapiens PE=2 SV=1	Q5U0B9,Q9Y240	CLEC11A	35694.4	7	10	16	DFEAQAAAQAR	R	C	0.997	70.7	30.8	17.4	70.7	0	2	1	0	2	1177.56	3413.99	24466100	193	203
Mudpit_Aged L3 4 Anterior NP IAF	Stem cell growth factor; lymphocyte secreted C-type lectin OS=Homo sapiens PE=2 SV=1	Q5U0B9,Q9Y240	CLEC11A	35694.4	7	10	16	EWEGGWGGAQEEER	R	E	0.989	34.7	25	15.2	34.7	0	1	0	0	2	1619.67	5276.1	3874850	28	41
Mudpit_Aged L3 4 Anterior NP IAF	Stem cell growth factor; lymphocyte secreted C-type lectin OS=Homo sapiens PE=2 SV=1	Q5U0B9,Q9Y240	CLEC11A	35694.4	7	10	16	HLQEALGLPAGR	K	G	0.992	31.3	25.2	15	31.3	0	2	0	0	2	1261.7	6543.65	12881800	50	61
Mudpit_Aged L3 4 Anterior NP IAF	Stem cell growth factor; lymphocyte secreted C-type lectin OS=Homo sapiens PE=2 SV=1	Q5U0B9,Q9Y240	CLEC11A	35694.4	7	10	16	LAGLDAGLHQLHVR	R	L	0.978	60.3	25	16.8	60.3	0	0	1	1	2	1499.84	9314.97	12844000	115	128
Mudpit_Aged L3 4 Anterior NP IAF	Stem cell growth factor; lymphocyte secreted C-type lectin OS=Homo sapiens PE=2 SV=1	Q5U0B9,Q9Y240	CLEC11A	35694.4	7	10	16	VVELTQGLR	R	Q	0.997	41.4	27.4	15.6	41.4	0	3	0	0	2	1014.59	4921.96	33953600	136	144
Mudpit_Aged L3 4 Anterior NP IAF	Matrix-remodeling-associated protein 5 OS=Homo sapiens GN=MXRA5 PE=2 SV=3	Q9NR99	MXRA5	312150	17	19	40	AAPLPSVR	K	W	0.98	27.2	25	14.8	27.2	0	1	0	0	2	810.483	3172.15	4619290	2073	2080
Mudpit_Aged L3 4 Anterior NP IAF	Matrix-remodeling-associated protein 5 OS=Homo sapiens GN=MXRA5 PE=2 SV=3	Q9NR99	MXRA5	312150	17	19	40	DLSSLQVFK	R	F	0.995	33.4	25.5	21.3	27.2	0	2	0	0	2	1036.57	7862.36	8911170	101	109
Mudpit_Aged L3 4 Anterior NP IAF	Matrix-remodeling-associated protein 5 OS=Homo sapiens GN=MXRA5 PE=2 SV=3	Q9NR99	MXRA5	312150	17	19	40	GTPAPQISWIFPDR	K	R	0.997	79.3	28.5	18	79.3	0	1	0	0	2	1584.82	9154.09	16587800	1976	1989
Mudpit_Aged L3 4 Anterior NP IAF	Matrix-remodeling-associated protein 5 OS=Homo sapiens GN=MXRA5 PE=2 SV=3	Q9NR99	MXRA5	312150	17	19	40	LIAYYSEVPVK	K	L	0.997	57.8	25.4	16.6	57.8	0	2	0	0	2	1281.71	6543.49	20596100	380	390
Mudpit_Aged L3 4 Anterior NP IAF	Matrix-remodeling-associated protein 5 OS=Homo sapiens GN=MXRA5 PE=2 SV=3	Q9NR99	MXRA5	312150	17	19	40	METEYGPSVTSIPVIVIAYPPR	R	I	0.997	128	25.3	21	128	0	2	0	0	2	2419.26	9284.37	7573760	2713	2734
Mudpit_Aged L3 4 Anterior NP IAF	Matrix-remodeling-associated protein 5 OS=Homo sapiens GN=MXRA5 PE=2 SV=3	Q9NR99	MXRA5	312150	17	19	40	MIDALFSFDSR	R	I	0.997	44.9	25	15.8	44.9	0	4	0	0	2	1317.61	8660.82	16491000	2187	2197
Mudpit_Aged L3 4 Anterior NP IAF	Matrix-remodeling-associated protein 5 OS=Homo sapiens GN=MXRA5 PE=2 SV=3	Q9NR99	MXRA5	312150	17	19	40	QDADEEALYYTGVR	R	A	0.997	103	25	19.4	103	0	6	0	0	2	1629.74	6357.1	35286700	409	422
Mudpit_Aged L3 4 Anterior NP IAF	Matrix-remodeling-associated protein 5 OS=Homo sapiens GN=MXRA5 PE=2 SV=3	Q9NR99	MXRA5	312150	17	19	40	SIEEEQEQEEDGGSQLILEK	R	F	0.997	101	25	19.3	101	0	2	3	0	2	2290.06	6005.47	18306500	291	310
Mudpit_Aged L3 4 Anterior NP IAF	Matrix-remodeling-associated protein 5 OS=Homo sapiens GN=MXRA5 PE=2 SV=3	Q9NR99	MXRA5	312150	17	19	40	SWVMIEPSGAVQR	R	D	0.997	54.2	34.3	18	52.6	0	4	0	0	2	1459.74	6624.17	22750700	475	487
Mudpit_Aged L3 4 Anterior NP IAF	Matrix-remodeling-associated protein 5 OS=Homo sapiens GN=MXRA5 PE=2 SV=3	Q9NR99	MXRA5	312150	17	19	40	VGDDYVVLK	K	V	0.997	39.1	26.6	15.4	39.1	0	2	0	0	2	1007.54	5069.61	11341900	2227	2235
Mudpit_Aged L3 4 Anterior NP IAF	Matrix-remodeling-associated protein 5 OS=Homo sapiens GN=MXRA5 PE=2 SV=3	Q9NR99	MXRA5	312150	17	19	40	VITGQTLQGLSNLMR	R	L	0.997	57.8	26.3	16.6	57.8	0	1	0	0	2	1646.89	6554.62	6866460	117	131
Mudpit_Aged L3 4 Anterior NP IAF	Matrix-remodeling-associated protein 5 OS=Homo sapiens GN=MXRA5 PE=2 SV=3	Q9NR99	MXRA5	312150	17	19	40	VLVQSPSTQPAEK	R	D	0.997	60.8	25.1	16.8	60.8	0	2	0	0	2	1383.75	2806.23	8653050	570	582
Mudpit_Aged L3 4 Anterior NP IAF	Matrix-remodeling-associated protein 5 OS=Homo sapiens GN=MXRA5 PE=2 SV=3	Q9NR99	MXRA5	312150	17	19	40	VQVSDSGYYR	K	C	0.997	56.7	25	16.5	56.7	0	2	0	0	2	1173.55	3041.83	14400500	641	650
Mudpit_Aged L3 4 Anterior NP IAF	Matrix-remodeling-associated protein 5 OS=Homo sapiens GN=MXRA5 PE=2 SV=3	Q9NR99	MXRA5	312150	17	19	40	VTWLSPTNK	K	V	0.949	29.6	28.2	14.8	29.6	0	1	0	0	2	1045.57	4786.62	4556970	2378	2386
Mudpit_Aged L3 4 Anterior NP IAF	Matrix-remodeling-associated protein 5 OS=Homo sapiens GN=MXRA5 PE=2 SV=3	Q9NR99	MXRA5	312150	17	19	40	VVTAPATIR	K	N	0.997	42.2	25	15.6	42.2	0	1	0	0	2	927.562	3226	5721490	2341	2349
Mudpit_Aged L3 4 Anterior NP IAF	Matrix-remodeling-associated protein 5 OS=Homo sapiens GN=MXRA5 PE=2 SV=3	Q9NR99	MXRA5	312150	17	19	40	VWQTVSPVEGR	R	I	0.996	46.4	27.4	16.6	45.7	0	2	0	0	2	1257.66	5457.86	6078120	1991	2001
Mudpit_Aged L3 4 Anterior NP IAF	Matrix-remodeling-associated protein 5 OS=Homo sapiens GN=MXRA5 PE=2 SV=3	Q9NR99	MXRA5	312150	17	19	40	YQIYQDGTLLIQK	K	A	0.996	39.3	26.3	15.5	39.3	0	2	0	0	2	1582.85	7328.85	8328370	2395	2407
Mudpit_Aged L3 4 Anterior NP IAF	Keratin, type I cytoskeletal 10 OS=Homo sapiens GN=KRT10 PE=1 SV=6	P13645	KRT10	58828.8	4	4	4	ALEESNYELEGK	R	I	0.997	80.5	33.5	18	80.5	0	1	0	0	2	1381.65	4006.05	6507940	166	177
Mudpit_Aged L3 4 Anterior NP IAF	Keratin, type I cytoskeletal 10 OS=Homo sapiens GN=KRT10 PE=1 SV=6	P13645	KRT10	58828.8	4	4	4	GSLGGGFSSGGFSGGSFSR	K	G	0.997	101	25	19.3	101	0	1	0	0	2	1707.77	6390.9	9187050	41	59
Mudpit_Aged L3 4 Anterior NP IAF	Keratin, type I cytoskeletal 10 OS=Homo sapiens GN=KRT10 PE=1 SV=6	P13645	KRT10	58828.8	4	4	4	LASYLDKVR	R	A	0.981	38.8	25	38.9	15.4	0	0	1	0	2	1064.61	4975.66	9586030	157	165
Mudpit_Aged L3 4 Anterior NP IAF	Keratin, type I cytoskeletal 10 OS=Homo sapiens GN=KRT10 PE=1 SV=6	P13645	KRT10	58828.8	4	4	4	LKYENEVALR	R	Q	0.995	57.7	26.6	46.9	27.4	0	0	1	0	2	1234.68	5303.63	7327490	236	245
Mudpit_Aged L3 4 Anterior NP IAF	cDNA FLJ37398 fis, clone BRAMY2027467, highly similar to Tubulin alpha-ubiquitous chain OS=Homo sapiens PE=2 SV=1	B3KT06,P68363,Q71U36	TUBA1A,TUBA1B	50135.7	2	2	2	AVFVDLEPTVIDEVR	R	T	0.997	45.4	26.3	15.8	45.4	0	1	0	0	2	1701.91	9095.16	14023600	65	79
Mudpit_Aged L3 4 Anterior NP IAF	cDNA FLJ37398 fis, clone BRAMY2027467, highly similar to Tubulin alpha-ubiquitous chain OS=Homo sapiens PE=2 SV=1	B3KT06,P68363,Q71U36	TUBA1A,TUBA1B	50135.7	2	2	2	EIIDLVLDR	K	I	0.997	48.7	26.8	16	48.7	0	1	0	0	2	1085.62	8526.4	9141380	113	121
Mudpit_Aged L3 4 Anterior NP IAF	Laminin, beta 2 (Laminin S), isoform CRA_a OS=Homo sapiens GN=LAMB2 PE=4 SV=1	A0A024R319,P55268	LAMB2	195976	3	3	3	AQEAEQLLR	R	G	0.997	44.9	25.9	20.9	39.7	0	1	0	0	2	1057.56	4002.98	3257350	1695	1703
Mudpit_Aged L3 4 Anterior NP IAF	Laminin, beta 2 (Laminin S), isoform CRA_a OS=Homo sapiens GN=LAMB2 PE=4 SV=1	A0A024R319,P55268	LAMB2	195976	3	3	3	GPLGDQYQTVK	R	A	0.995	42.7	27.4	15.7	42.7	0	1	0	0	2	1205.62	3487.49	2136380	1704	1714
Mudpit_Aged L3 4 Anterior NP IAF	Laminin, beta 2 (Laminin S), isoform CRA_a OS=Homo sapiens GN=LAMB2 PE=4 SV=1	A0A024R319,P55268	LAMB2	195976	3	3	3	YSEIEPSTEGEVIYR	R	V	0.997	64.8	25	21.3	60.6	0	1	0	0	2	1771.84	6056.66	3237220	206	220
Mudpit_Aged L3 4 Anterior NP IAF	Lysyl oxidase homolog 3 OS=Homo sapiens GN=LOXL3 PE=2 SV=1	P58215	LOXL3	83164.5	3	3	4	ELGFTEATGWTHSAK	R	Y	0.965	33.6	25.6	15.1	33.6	0	0	1	0	2	1634.78	6566.43	25873300	85	99
Mudpit_Aged L3 4 Anterior NP IAF	Lysyl oxidase homolog 3 OS=Homo sapiens GN=LOXL3 PE=2 SV=1	P58215	LOXL3	83164.5	3	3	4	FSSQIHNLGR	R	A	0.987	47.5	27.5	16	47.5	0	0	1	0	2	1158.6	4861.66	4953850	580	589
Mudpit_Aged L3 4 Anterior NP IAF	Lysyl oxidase homolog 3 OS=Homo sapiens GN=LOXL3 PE=2 SV=1	P58215	LOXL3	83164.5	3	3	4	RPLPVTEGLVEVR	R	L	0.986	40.6	25	15.5	40.6	0	0	2	0	2	1464.85	7776.84	20439200	180	192
Mudpit_Aged L3 4 Anterior NP IAF	cDNA, FLJ92374, highly similar to Homo sapiens C-type lectin domain family 3, member B (CLEC3B), mRNA OS=Homo sapiens PE=2 SV=1	B2R582		22537	4	7	12	GGTLSTPQTGSENDALYEYLR	R	Q	0.997	96.1	25.6	19	96.1	0	3	1	0	2	2272.07	8001.33	49917000	102	122
Mudpit_Aged L3 4 Anterior NP IAF	cDNA, FLJ92374, highly similar to Homo sapiens C-type lectin domain family 3, member B (CLEC3B), mRNA OS=Homo sapiens PE=2 SV=1	B2R582		22537	4	7	12	LDTLAQEVALLK	R	E	0.997	80.7	25	18	80.7	0	3	1	0	2	1313.77	8774.7	120810000	51	62
Mudpit_Aged L3 4 Anterior NP IAF	cDNA, FLJ92374, highly similar to Homo sapiens C-type lectin domain family 3, member B (CLEC3B), mRNA OS=Homo sapiens PE=2 SV=1	B2R582		22537	4	7	12	NWETEITAQPDGGK	K	T	0.997	42.5	25	15.7	42.5	0	2	1	0	2	1545.72	5970.45	33817500	156	169
Mudpit_Aged L3 4 Anterior NP IAF	cDNA, FLJ92374, highly similar to Homo sapiens C-type lectin domain family 3, member B (CLEC3B), mRNA OS=Homo sapiens PE=2 SV=1	B2R582		22537	4	7	12	TENCAVLSGAANGK	K	W	0.997	53.2	25	16.3	53.2	0	1	0	0	2	1392.64	2808.42	14607300	170	183
Mudpit_Aged L3 4 Anterior NP IAF	Adseverin OS=Homo sapiens GN=SCIN PE=1 SV=4	Q9Y6U3	SCIN	80490.2	2	2	2	LYMVSDASGSMR	K	V	0.987	32.5	25	15	32.5	0	1	0	0	2	1348.59	2967.62	337685	251	262
Mudpit_Aged L3 4 Anterior NP IAF	Adseverin OS=Homo sapiens GN=SCIN PE=1 SV=4	Q9Y6U3	SCIN	80490.2	2	2	2	SLGGQAVQIR	R	V	0.997	58.9	25.5	17.1	58.4	0	1	0	0	2	1028.58	3873.14	4517660	463	472
Mudpit_Aged L3 4 Anterior NP IAF	Cadherin-1 OS=Homo sapiens GN=CDH1 PE=1 SV=1	A0A087WU43,A0A087WX17,A0A087WXI5,A0A0E3XJU3,A0A0U2ZQU7,A5D8W4,B3GN61,B4DNH0,D3XNU5,H3BNC6,H3BVI7,P12830,Q9UII7	CDH1	97457.6	2	2	12	TAYFSLDTR	R	F	0.995	34.1	25	15.1	34.1	0	2	0	0	2	1073.53	6121.02	17034000	66	74
Mudpit_Aged L3 4 Anterior NP IAF	Cadherin-1 OS=Homo sapiens GN=CDH1 PE=1 SV=1	A0A087WU43,A0A087WX17,A0A087WXI5,A0A0E3XJU3,A0A0U2ZQU7,A5D8W4,B3GN61,B4DNH0,D3XNU5,H3BNC6,H3BVI7,P12830,Q9UII7	CDH1	97457.6	2	2	12	VGTDGVITVK	K	R	0.997	80.6	28.5	36.4	62.2	0	10	0	0	2	988.567	3826.91	73564100	77	86
Mudpit_Aged L3 4 Anterior NP IAF	Cystatin OS=Homo sapiens GN=HEL-S-2 PE=2 SV=1	A0A0K0K1J1,P01034	CST3,HEL-S-2	15799.2	3	5	8	ALDFAVGEYNK	R	A	0.996	46.7	26.6	23.2	39.5	0	3	0	0	2	1226.61	6115.7	54644500	52	62
Mudpit_Aged L3 4 Anterior NP IAF	Cystatin OS=Homo sapiens GN=HEL-S-2 PE=2 SV=1	A0A0K0K1J1,P01034	CST3,HEL-S-2	15799.2	3	5	8	LVGGPMDASVEEEGVR	R	R	0.997	83.4	25	18.2	83.4	0	3	0	0	2	1660.78	4411.74	17258100	35	50
Mudpit_Aged L3 4 Anterior NP IAF	Cystatin OS=Homo sapiens GN=HEL-S-2 PE=2 SV=1	A0A0K0K1J1,P01034	CST3,HEL-S-2	15799.2	3	5	8	LVGGPMDASVEEEGVRR	R	A	0.988	30.3	26	14.9	30.3	0	1	1	0	2	1800.89	5999.43	21413100	35	51
Mudpit_Aged L3 4 Anterior NP IAF	Complement C5 OS=Homo sapiens GN=C5 PE=1 SV=4	P01031	C5	188309	30	45	99	ALLVGEHLNIIVTPK	K	S	0.997	67.5	25	17.2	67.5	0	1	0	0	2	1616.97	9232.52	6985860	475	489
Mudpit_Aged L3 4 Anterior NP IAF	Complement C5 OS=Homo sapiens GN=C5 PE=1 SV=4	P01031	C5	188309	30	45	99	ALVEGVDQLFTDYQIK	K	D	0.997	113	25.9	20.1	113	0	5	1	0	2	1838.95	8939.02	91013600	1441	1456
Mudpit_Aged L3 4 Anterior NP IAF	Complement C5 OS=Homo sapiens GN=C5 PE=1 SV=4	P01031	C5	188309	30	45	99	ATLLDIYK	K	T	0.99	50	25	36.7	29.5	0	3	0	0	2	936.54	7223.56	23284800	1579	1586
Mudpit_Aged L3 4 Anterior NP IAF	Complement C5 OS=Homo sapiens GN=C5 PE=1 SV=4	P01031	C5	188309	30	45	99	DINYVNPVIK	K	W	0.987	33	27.8	15.6	32.5	0	2	0	0	2	1174.65	6134.64	69980600	1263	1272
Mudpit_Aged L3 4 Anterior NP IAF	Complement C5 OS=Homo sapiens GN=C5 PE=1 SV=4	P01031	C5	188309	30	45	99	DSEITFIK	K	K	0.99	48.6	25.4	22.3	42.4	0	4	0	0	2	952.499	5677.33	62291900	1595	1602
Mudpit_Aged L3 4 Anterior NP IAF	Complement C5 OS=Homo sapiens GN=C5 PE=1 SV=4	P01031	C5	188309	30	45	99	DSLDQLVGGVPVTLNAQTIDVNQETSDLDPSK	K	S	0.997	118	26.3	20.4	118	0	0	1	0	2	3368.67	9168.47	8329090	377	408
Mudpit_Aged L3 4 Anterior NP IAF	Complement C5 OS=Homo sapiens GN=C5 PE=1 SV=4	P01031	C5	188309	30	45	99	EDFSTTGTAYFEVK	K	E	0.997	51.9	25	16.2	51.9	0	3	0	0	2	1594.73	7137.2	23955500	207	220
Mudpit_Aged L3 4 Anterior NP IAF	Complement C5 OS=Homo sapiens GN=C5 PE=1 SV=4	P01031	C5	188309	30	45	99	EESSSGSSHAVMDISLPTGISANEEDLK	R	A	0.997	70.3	25	17.4	70.3	0	0	5	0	2	2906.32	8033.8	41514500	1413	1440
Mudpit_Aged L3 4 Anterior NP IAF	Complement C5 OS=Homo sapiens GN=C5 PE=1 SV=4	P01031	C5	188309	30	45	99	EGMLSIMSYR	K	N	0.988	29.6	25	14.8	29.6	0	2	0	0	2	1186.56	7585.87	13301100	1051	1060
Mudpit_Aged L3 4 Anterior NP IAF	Complement C5 OS=Homo sapiens GN=C5 PE=1 SV=4	P01031	C5	188309	30	45	99	ELSYYSLEDLNNK	K	Y	0.997	56.4	25.6	16.5	56.4	0	2	0	0	2	1587.75	7378.84	8576330	309	321
Mudpit_Aged L3 4 Anterior NP IAF	Complement C5 OS=Homo sapiens GN=C5 PE=1 SV=4	P01031	C5	188309	30	45	99	ESYSGVTLDPR	R	G	0.997	55.2	26	16.5	55.2	0	3	0	0	2	1223.59	4614.53	52529700	937	947
Mudpit_Aged L3 4 Anterior NP IAF	Complement C5 OS=Homo sapiens GN=C5 PE=1 SV=4	P01031	C5	188309	30	45	99	FQNSAILTIQPK	K	Q	0.995	33.3	25.4	15.1	33.3	0	2	0	0	2	1359.76	6109.05	31372100	79	90
Mudpit_Aged L3 4 Anterior NP IAF	Complement C5 OS=Homo sapiens GN=C5 PE=1 SV=4	P01031	C5	188309	30	45	99	FSDASYQSINIPVTQNMVPSSR	K	L	0.997	131	25.8	21.2	131	0	5	2	0	2	2441.18	8315.05	32132700	518	539
Mudpit_Aged L3 4 Anterior NP IAF	Complement C5 OS=Homo sapiens GN=C5 PE=1 SV=4	P01031	C5	188309	30	45	99	FSYSSGHVHLSSENK	K	F	0.997	84	25	18.3	84	0	1	1	0	2	1678.78	5363.57	20997400	64	78
Mudpit_Aged L3 4 Anterior NP IAF	Complement C5 OS=Homo sapiens GN=C5 PE=1 SV=4	P01031	C5	188309	30	45	99	IDTQDIEASHYR	K	G	0.997	86.7	25.1	18.7	86.4	0	2	4	0	2	1447.68	4720.03	64697900	1381	1392
Mudpit_Aged L3 4 Anterior NP IAF	Complement C5 OS=Homo sapiens GN=C5 PE=1 SV=4	P01031	C5	188309	30	45	99	IPLDLVPK	R	T	0.99	36.8	25	15.3	36.8	0	5	0	0	2	894.566	6777.64	79124800	963	970
Mudpit_Aged L3 4 Anterior NP IAF	Complement C5 OS=Homo sapiens GN=C5 PE=1 SV=4	P01031	C5	188309	30	45	99	ITHYNYLILSK	K	G	0.959	33.2	25	15.1	33.2	0	0	1	0	2	1364.76	8728.87	5927400	496	506
Mudpit_Aged L3 4 Anterior NP IAF	Complement C5 OS=Homo sapiens GN=C5 PE=1 SV=4	P01031	C5	188309	30	45	99	LQGTLPVEAR	K	E	0.997	50.7	25	16.2	50.7	0	2	0	0	2	1083.62	4097.31	55134100	1129	1138
Mudpit_Aged L3 4 Anterior NP IAF	Complement C5 OS=Homo sapiens GN=C5 PE=1 SV=4	P01031	C5	188309	30	45	99	LSMDIDVSYK	R	H	0.997	55.2	25	16.5	55.2	0	4	0	0	2	1186.57	4765.15	40265300	1309	1318
Mudpit_Aged L3 4 Anterior NP IAF	Complement C5 OS=Homo sapiens GN=C5 PE=1 SV=4	P01031	C5	188309	30	45	99	MVETTAYALLTSLNLK	R	D	0.995	56	25.6	16.5	56	0	0	3	0	2	1767.96	9267.81	71323400	1247	1262
Mudpit_Aged L3 4 Anterior NP IAF	Complement C5 OS=Homo sapiens GN=C5 PE=1 SV=4	P01031	C5	188309	30	45	99	NADYSYSVWK	R	G	0.997	57.6	25	16.6	57.6	0	4	0	0	2	1232.56	5903.74	44809600	1061	1070
Mudpit_Aged L3 4 Anterior NP IAF	Complement C5 OS=Homo sapiens GN=C5 PE=1 SV=4	P01031	C5	188309	30	45	99	QLPGGQNPVSYVYLEVVSK	K	H	0.997	96.2	26.2	19	96.2	0	2	2	0	2	2077.1	9258.67	59119300	91	109
Mudpit_Aged L3 4 Anterior NP IAF	Complement C5 OS=Homo sapiens GN=C5 PE=1 SV=4	P01031	C5	188309	30	45	99	RESYSGVTLDPR	K	G	0.959	35.4	26.7	15.2	35.4	0	0	1	0	2	1379.69	4921.41	8109330	936	947
Mudpit_Aged L3 4 Anterior NP IAF	Complement C5 OS=Homo sapiens GN=C5 PE=1 SV=4	P01031	C5	188309	30	45	99	SYFPESWLWEVHLVPR	R	R	0.98	45.5	26.7	15.8	45.5	0	0	3	0	2	2045.03	9619.42	9096580	767	782
Mudpit_Aged L3 4 Anterior NP IAF	Complement C5 OS=Homo sapiens GN=C5 PE=1 SV=4	P01031	C5	188309	30	45	99	TDAPDLPEENQAR	K	E	0.997	66	25	17.1	66	0	2	1	0	2	1455.67	3738.9	85262300	437	449
Mudpit_Aged L3 4 Anterior NP IAF	Complement C5 OS=Homo sapiens GN=C5 PE=1 SV=4	P01031	C5	188309	30	45	99	TGEAVAEKDSEITFIK	K	K	0.997	61.3	26.7	16.8	61.3	0	1	2	0	2	1737.89	7572.83	16269900	1587	1602
Mudpit_Aged L3 4 Anterior NP IAF	Complement C5 OS=Homo sapiens GN=C5 PE=1 SV=4	P01031	C5	188309	30	45	99	TLLPVSKPEIR	K	S	0.985	42.3	25	15.6	42.3	0	0	6	0	2	1252.76	7765.01	51589800	756	766
Mudpit_Aged L3 4 Anterior NP IAF	Complement C5 OS=Homo sapiens GN=C5 PE=1 SV=4	P01031	C5	188309	30	45	99	VYSLNDDLKPAK	R	R	0.997	56	27.5	16.5	56	0	2	2	0	2	1362.73	5746.31	65757400	145	156
Mudpit_Aged L3 4 Anterior NP IAF	Complement C5 OS=Homo sapiens GN=C5 PE=1 SV=4	P01031	C5	188309	30	45	99	YGGGFYSTQDTINAIEGLTEYSLLVK	R	Q	0.997	86.5	25.8	18.4	86.5	0	1	2	0	2	2839.4	9538.93	11144800	1280	1305
Mudpit_Aged L3 4 Anterior NP IAF	Complement C5 OS=Homo sapiens GN=C5 PE=1 SV=4	P01031	C5	188309	30	45	99	YIYPLDSLTWIEYWPR	R	D	0.997	87	27.3	18.4	87	0	3	1	0	2	2115.06	9518.8	15745800	1635	1650
Mudpit_Aged L3 4 Anterior NP IAF	Protein S isoform 1 (Fragment) OS=Homo sapiens GN=PROS1 PE=2 SV=1	A0A0S2Z4K3,A0A0S2Z4L3,P07225,Q16519,Q9NSD0	PROS1	75123.4	6	6	8	FSAEFDFR	R	T	0.99	35.7	25	15.2	35.7	0	1	0	0	2	1018.46	6552.74	23648700	323	330
Mudpit_Aged L3 4 Anterior NP IAF	Protein S isoform 1 (Fragment) OS=Homo sapiens GN=PROS1 PE=2 SV=1	A0A0S2Z4K3,A0A0S2Z4L3,P07225,Q16519,Q9NSD0	PROS1	75123.4	6	6	8	IETISHEDLQR	K	Q	0.989	49.5	26.6	16.1	49.5	0	0	1	0	2	1340.68	4273.03	35586700	592	602
Mudpit_Aged L3 4 Anterior NP IAF	Protein S isoform 1 (Fragment) OS=Homo sapiens GN=PROS1 PE=2 SV=1	A0A0S2Z4K3,A0A0S2Z4L3,P07225,Q16519,Q9NSD0	PROS1	75123.4	6	6	8	NNLELSTPLK	R	I	0.997	56.2	26.9	16.5	56.2	0	2	0	0	2	1128.63	5631.44	12942700	582	591
Mudpit_Aged L3 4 Anterior NP IAF	Protein S isoform 1 (Fragment) OS=Homo sapiens GN=PROS1 PE=2 SV=1	A0A0S2Z4K3,A0A0S2Z4L3,P07225,Q16519,Q9NSD0	PROS1	75123.4	6	6	8	QSTNAYPDLR	R	S	0.997	65.3	25.8	27.3	55.1	0	2	0	0	2	1164.56	3305.08	15016600	102	111
Mudpit_Aged L3 4 Anterior NP IAF	Protein S isoform 1 (Fragment) OS=Homo sapiens GN=PROS1 PE=2 SV=1	A0A0S2Z4K3,A0A0S2Z4L3,P07225,Q16519,Q9NSD0	PROS1	75123.4	6	6	8	SFQTGLFTAAR	R	Q	0.997	47.3	25.1	16	47.3	0	1	0	0	2	1198.62	6646.51	9492870	91	101
Mudpit_Aged L3 4 Anterior NP IAF	Protein S isoform 1 (Fragment) OS=Homo sapiens GN=PROS1 PE=2 SV=1	A0A0S2Z4K3,A0A0S2Z4L3,P07225,Q16519,Q9NSD0	PROS1	75123.4	6	6	8	SQDILLSVENTVIYR	K	I	0.997	88.5	26.7	18.5	88.5	0	1	0	0	2	1749.94	9137.89	30626000	547	561
Mudpit_Aged L3 4 Anterior NP IAF	Alpha-2-macroglobulin OS=Homo sapiens GN=A2M PE=1 SV=3	P01023	A2M	163290	44	69	266	AAQVTIQSSGTFSSK	K	F	0.997	99.8	26.6	19.2	99.8	0	10	0	0	2	1511.77	4354.86	42615700	1275	1289
Mudpit_Aged L3 4 Anterior NP IAF	Alpha-2-macroglobulin OS=Homo sapiens GN=A2M PE=1 SV=3	P01023	A2M	163290	44	69	266	AFQPFFVELTMPYSVIR	R	G	0.997	71.3	27.2	17.5	71.3	0	3	0	0	2	2045.06	9418.03	46623300	788	804
Mudpit_Aged L3 4 Anterior NP IAF	Alpha-2-macroglobulin OS=Homo sapiens GN=A2M PE=1 SV=3	P01023	A2M	163290	44	69	266	AIGYLNTGYQR	K	Q	0.997	50.4	26	16.1	50.4	0	2	0	0	2	1255.64	5216.15	68747500	1004	1014
Mudpit_Aged L3 4 Anterior NP IAF	Alpha-2-macroglobulin OS=Homo sapiens GN=A2M PE=1 SV=3	P01023	A2M	163290	44	69	266	ALLAYAFALAGNQDK	K	R	0.997	67.2	26.2	17.2	67.2	0	1	0	0	2	1565.83	9093.46	40746800	1148	1162
Mudpit_Aged L3 4 Anterior NP IAF	Alpha-2-macroglobulin OS=Homo sapiens GN=A2M PE=1 SV=3	P01023	A2M	163290	44	69	266	ATVLNYLPK	K	C	0.997	47.7	25	28.8	34.9	0	7	0	0	2	1018.59	6975.96	140446000	812	820
Mudpit_Aged L3 4 Anterior NP IAF	Alpha-2-macroglobulin OS=Homo sapiens GN=A2M PE=1 SV=3	P01023	A2M	163290	44	69	266	AVDQSVLLMKPDAELSASSVYNLLPEK	R	D	0.997	77.1	25.3	17.8	77.1	0	0	2	0	2	2933.52	9258.14	14525200	599	625
Mudpit_Aged L3 4 Anterior NP IAF	Alpha-2-macroglobulin OS=Homo sapiens GN=A2M PE=1 SV=3	P01023	A2M	163290	44	69	266	DLKPAIVK	R	V	0.99	38.2	25	22.7	31	0	2	0	0	2	883.561	4589.01	19559500	1441	1448
Mudpit_Aged L3 4 Anterior NP IAF	Alpha-2-macroglobulin OS=Homo sapiens GN=A2M PE=1 SV=3	P01023	A2M	163290	44	69	266	DLTGFPGPLNDQDNEDCINR	K	H	0.997	68.6	25	17.3	68.6	0	5	4	0	2	2290.99	7929.65	150996000	626	645
Mudpit_Aged L3 4 Anterior NP IAF	Alpha-2-macroglobulin OS=Homo sapiens GN=A2M PE=1 SV=3	P01023	A2M	163290	44	69	266	DMYSFLEDMGLK	K	A	0.997	61.5	25	16.8	61.5	0	10	0	0	2	1464.64	9126.49	242690000	665	676
Mudpit_Aged L3 4 Anterior NP IAF	Alpha-2-macroglobulin OS=Homo sapiens GN=A2M PE=1 SV=3	P01023	A2M	163290	44	69	266	DTVIKPLLVEPEGLEK	K	E	0.997	64.6	25	17	64.6	0	5	7	0	2	1780.01	8978.91	142061000	897	912
Mudpit_Aged L3 4 Anterior NP IAF	Alpha-2-macroglobulin OS=Homo sapiens GN=A2M PE=1 SV=3	P01023	A2M	163290	44	69	266	ETTFNSLLCPSGGEVSEELSLK	K	L	0.997	92	25.6	18.8	92	0	1	2	0	2	2398.13	9018.53	26979500	913	934
Mudpit_Aged L3 4 Anterior NP IAF	Alpha-2-macroglobulin OS=Homo sapiens GN=A2M PE=1 SV=3	P01023	A2M	163290	44	69	266	FEVQVTVPK	K	I	0.997	46.3	27.8	15.9	46.3	0	5	0	0	2	1046.59	6147.19	176418000	229	237
Mudpit_Aged L3 4 Anterior NP IAF	Alpha-2-macroglobulin OS=Homo sapiens GN=A2M PE=1 SV=3	P01023	A2M	163290	44	69	266	FSGQLNSHGCFYQQVK	K	T	0.997	64.4	25	17	64.4	0	5	1	0	2	1900.86	6972.15	20171200	290	305
Mudpit_Aged L3 4 Anterior NP IAF	Alpha-2-macroglobulin OS=Homo sapiens GN=A2M PE=1 SV=3	P01023	A2M	163290	44	69	266	GHFSISIPVK	K	S	0.997	52.4	25	16.3	52.4	0	4	3	0	2	1084.62	8817.47	61621200	522	531
Mudpit_Aged L3 4 Anterior NP IAF	Alpha-2-macroglobulin OS=Homo sapiens GN=A2M PE=1 SV=3	P01023	A2M	163290	44	69	266	HYDGSYSTFGER	K	Y	0.997	68.5	25	17.3	68.5	0	9	2	0	2	1418.6	4315.13	128551000	1020	1031
Mudpit_Aged L3 4 Anterior NP IAF	Alpha-2-macroglobulin OS=Homo sapiens GN=A2M PE=1 SV=3	P01023	A2M	163290	44	69	266	IAQWQSFQLEGGLK	R	Q	0.997	62.4	32.7	16.9	62.4	0	4	0	0	2	1604.84	8584.99	69750600	175	188
Mudpit_Aged L3 4 Anterior NP IAF	Alpha-2-macroglobulin OS=Homo sapiens GN=A2M PE=1 SV=3	P01023	A2M	163290	44	69	266	LHTEAQIQEEGTVVELTGR	K	Q	0.997	126	25.6	20.9	126	0	13	22	0	2	2110.08	8341.8	219493000	320	338
Mudpit_Aged L3 4 Anterior NP IAF	Alpha-2-macroglobulin OS=Homo sapiens GN=A2M PE=1 SV=3	P01023	A2M	163290	44	69	266	LLIYAVLPTGDVIGDSAK	R	Y	0.997	77.5	25	17.9	77.5	0	2	0	0	2	1845.04	9195.99	70473200	540	557
Mudpit_Aged L3 4 Anterior NP IAF	Alpha-2-macroglobulin OS=Homo sapiens GN=A2M PE=1 SV=3	P01023	A2M	163290	44	69	266	LLLQQVSLPELPGEYSMK	R	V	0.997	72.6	25.8	17.5	72.6	0	5	2	0	2	2045.1	9132.8	233501000	1298	1315
Mudpit_Aged L3 4 Anterior NP IAF	Alpha-2-macroglobulin OS=Homo sapiens GN=A2M PE=1 SV=3	P01023	A2M	163290	44	69	266	LPPNVVEESAR	K	A	0.997	68.3	28.5	17.3	68.3	0	10	0	0	2	1210.64	4106.53	835746000	935	945
Mudpit_Aged L3 4 Anterior NP IAF	Alpha-2-macroglobulin OS=Homo sapiens GN=A2M PE=1 SV=3	P01023	A2M	163290	44	69	266	LVHVEEPHTETVR	R	K	0.981	47.9	27.1	16	47.9	0	0	2	4	2	1545.8	6334.87	505089000	720	732
Mudpit_Aged L3 4 Anterior NP IAF	Alpha-2-macroglobulin OS=Homo sapiens GN=A2M PE=1 SV=3	P01023	A2M	163290	44	69	266	MVSGFIPLKPTVK	K	M	0.961	42.9	25	15.7	42.9	0	0	2	0	2	1416.83	8093.23	17696800	1385	1397
Mudpit_Aged L3 4 Anterior NP IAF	Alpha-2-macroglobulin OS=Homo sapiens GN=A2M PE=1 SV=3	P01023	A2M	163290	44	69	266	NALFCLESAWK	R	T	0.973	36.6	29.8	15.3	36.6	0	1	0	0	2	1339.64	9234.87	18198700	1123	1133
Mudpit_Aged L3 4 Anterior NP IAF	Alpha-2-macroglobulin OS=Homo sapiens GN=A2M PE=1 SV=3	P01023	A2M	163290	44	69	266	NEDSLVFVQTDK	K	S	0.997	70.8	25.9	27.8	60.4	0	7	0	0	2	1394.68	6045.4	62719300	124	135
Mudpit_Aged L3 4 Anterior NP IAF	Alpha-2-macroglobulin OS=Homo sapiens GN=A2M PE=1 SV=3	P01023	A2M	163290	44	69	266	NQGNTWLTAFVLK	R	T	0.997	61.9	26.1	16.9	61.9	0	1	0	0	2	1491.8	9222.59	49530700	1035	1047
Mudpit_Aged L3 4 Anterior NP IAF	Alpha-2-macroglobulin OS=Homo sapiens GN=A2M PE=1 SV=3	P01023	A2M	163290	44	69	266	QFSFPLSSEPFQGSYK	K	V	0.997	80.4	25.7	18	80.4	0	5	1	0	2	1848.88	9024.52	93996100	189	204
Mudpit_Aged L3 4 Anterior NP IAF	Alpha-2-macroglobulin OS=Homo sapiens GN=A2M PE=1 SV=3	P01023	A2M	163290	44	69	266	QGIPFFGQVR	R	L	0.997	54.4	26.1	23.1	47.7	0	2	0	0	2	1148.62	8427.31	98989000	361	370
Mudpit_Aged L3 4 Anterior NP IAF	Alpha-2-macroglobulin OS=Homo sapiens GN=A2M PE=1 SV=3	P01023	A2M	163290	44	69	266	QQNAQGGFSSTQDTVVALHALSK	K	Y	0.997	125	26.9	20.8	125	0	2	2	0	2	2387.2	8896.7	24089500	1241	1263
Mudpit_Aged L3 4 Anterior NP IAF	Alpha-2-macroglobulin OS=Homo sapiens GN=A2M PE=1 SV=3	P01023	A2M	163290	44	69	266	QTVSWAVTPK	R	S	0.997	78.7	27.2	17.9	78.7	0	2	0	0	2	1116.6	4740.28	26081500	854	863
Mudpit_Aged L3 4 Anterior NP IAF	Alpha-2-macroglobulin OS=Homo sapiens GN=A2M PE=1 SV=3	P01023	A2M	163290	44	69	266	SASNMAIVDVK	R	M	0.997	76.9	26	17.8	76.9	0	7	0	0	2	1134.58	4497.49	71228600	1374	1384
Mudpit_Aged L3 4 Anterior NP IAF	Alpha-2-macroglobulin OS=Homo sapiens GN=A2M PE=1 SV=3	P01023	A2M	163290	44	69	266	SDIAPVAR	K	L	0.99	37.7	25	15.4	37.7	0	1	0	0	2	828.457	2254.28	2671840	532	539
Mudpit_Aged L3 4 Anterior NP IAF	Alpha-2-macroglobulin OS=Homo sapiens GN=A2M PE=1 SV=3	P01023	A2M	163290	44	69	266	SLFTDLEAENDVLHCVAFAVPK	R	S	0.988	42.4	26.1	15.6	42.4	0	1	1	0	2	2476.21	9649.22	7276280	72	93
Mudpit_Aged L3 4 Anterior NP IAF	Alpha-2-macroglobulin OS=Homo sapiens GN=A2M PE=1 SV=3	P01023	A2M	163290	44	69	266	SSGSLLNNAIK	R	G	0.997	56.8	28.1	16.6	56.8	0	6	0	0	2	1103.61	4682.25	75319500	1082	1092
Mudpit_Aged L3 4 Anterior NP IAF	Alpha-2-macroglobulin OS=Homo sapiens GN=A2M PE=1 SV=3	P01023	A2M	163290	44	69	266	SSSNEEVMFLTVQVK	K	G	0.997	111	25.4	19.9	111	0	9	1	0	2	1713.84	8169.56	95797500	94	108
Mudpit_Aged L3 4 Anterior NP IAF	Alpha-2-macroglobulin OS=Homo sapiens GN=A2M PE=1 SV=3	P01023	A2M	163290	44	69	266	TEHPFTVEEFVLPK	R	F	0.997	56.8	27.5	16.5	56.8	0	7	9	0	2	1672.86	9545.78	335347000	215	228
Mudpit_Aged L3 4 Anterior NP IAF	Alpha-2-macroglobulin OS=Homo sapiens GN=A2M PE=1 SV=3	P01023	A2M	163290	44	69	266	TEVSSNHVLIYLDK	R	V	0.997	99.4	27.7	19.2	99.4	0	6	9	0	2	1617.85	7648.7	141490000	1408	1421
Mudpit_Aged L3 4 Anterior NP IAF	Alpha-2-macroglobulin OS=Homo sapiens GN=A2M PE=1 SV=3	P01023	A2M	163290	44	69	266	TGTHGLLVK	R	Q	0.997	46.1	25	30.3	31.6	0	1	0	0	2	925.547	6194.89	4259540	508	516
Mudpit_Aged L3 4 Anterior NP IAF	Alpha-2-macroglobulin OS=Homo sapiens GN=A2M PE=1 SV=3	P01023	A2M	163290	44	69	266	VDLSFSPSQSLPASHAHLR	K	V	0.991	70.3	26.8	17.4	70.3	0	0	0	4	2	2049.05	9429.95	80547300	568	586
Mudpit_Aged L3 4 Anterior NP IAF	Alpha-2-macroglobulin OS=Homo sapiens GN=A2M PE=1 SV=3	P01023	A2M	163290	44	69	266	VGFYESDVMGR	R	G	0.997	76	25	25.4	68.4	0	7	0	0	2	1259.57	5943.24	83885600	705	715
Mudpit_Aged L3 4 Anterior NP IAF	Alpha-2-macroglobulin OS=Homo sapiens GN=A2M PE=1 SV=3	P01023	A2M	163290	44	69	266	VSVQLEASPAFLAVPVEK	R	E	0.997	78.7	25	17.9	78.7	0	4	3	0	2	1884.05	9050.91	158876000	824	841
Mudpit_Aged L3 4 Anterior NP IAF	Alpha-2-macroglobulin OS=Homo sapiens GN=A2M PE=1 SV=3	P01023	A2M	163290	44	69	266	VVSMDENFHPLNELIPLVYIQDPK	R	G	0.997	72.3	25.2	17.5	72.3	0	5	0	0	2	2810.44	9658.37	15825800	148	171
Mudpit_Aged L3 4 Anterior NP IAF	Alpha-2-macroglobulin OS=Homo sapiens GN=A2M PE=1 SV=3	P01023	A2M	163290	44	69	266	VYDYYETDEFAIAEYNAPCSK	K	D	0.988	42.4	25	15.6	42.4	0	1	0	0	2	2549.07	8653.82	1849920	1449	1469
Mudpit_Aged L3 4 Anterior NP IAF	Alpha-2-macroglobulin OS=Homo sapiens GN=A2M PE=1 SV=3	P01023	A2M	163290	44	69	266	YDVENCLANK	K	V	0.997	42.4	25	23	35.1	0	3	0	0	2	1226.54	3588.28	16571400	558	567
Mudpit_Aged L3 4 Anterior NP IAF	Alpha-2-macroglobulin OS=Homo sapiens GN=A2M PE=1 SV=3	P01023	A2M	163290	44	69	266	YGAATFTR	K	T	0.99	42.1	25	32.4	25.3	0	2	0	0	2	886.442	3332.63	30880500	1264	1271
Mudpit_Aged L3 4 Anterior NP IAF	Serpin peptidase inhibitor, clade A (Alpha-1 antiproteinase, antitrypsin), member 3, isoform CRA_c OS=Homo sapiens GN=SERPINA3 PE=3 SV=1	A0A024R6P0,B3KS79,P01011	SERPINA3	47653	12	22	152	ADLSGITGAR	K	N	0.997	64.5	28.6	29.8	51.7	0	6	0	0	2	960.511	3707.91	104711000	341	350
Mudpit_Aged L3 4 Anterior NP IAF	Serpin peptidase inhibitor, clade A (Alpha-1 antiproteinase, antitrypsin), member 3, isoform CRA_c OS=Homo sapiens GN=SERPINA3 PE=3 SV=1	A0A024R6P0,B3KS79,P01011	SERPINA3	47653	12	22	152	AVLDVFEEGTEASAATAVK	K	I	0.997	117	26.8	20.3	117	0	18	12	0	2	1907.96	8371.61	413124000	361	379
Mudpit_Aged L3 4 Anterior NP IAF	Serpin peptidase inhibitor, clade A (Alpha-1 antiproteinase, antitrypsin), member 3, isoform CRA_c OS=Homo sapiens GN=SERPINA3 PE=3 SV=1	A0A024R6P0,B3KS79,P01011	SERPINA3	47653	12	22	152	DLDSQTMMVLVNYIFFK	K	A	0.985	46.5	30	15.9	5.29	0	0	1	0	2	2080.01	9572.5	832116	198	214
Mudpit_Aged L3 4 Anterior NP IAF	Serpin peptidase inhibitor, clade A (Alpha-1 antiproteinase, antitrypsin), member 3, isoform CRA_c OS=Homo sapiens GN=SERPINA3 PE=3 SV=1	A0A024R6P0,B3KS79,P01011	SERPINA3	47653	12	22	152	EIGELYLPK	R	F	0.997	64	25.8	17	64	0	6	0	0	2	1061.59	6700.84	134066000	307	315
Mudpit_Aged L3 4 Anterior NP IAF	Serpin peptidase inhibitor, clade A (Alpha-1 antiproteinase, antitrypsin), member 3, isoform CRA_c OS=Homo sapiens GN=SERPINA3 PE=3 SV=1	A0A024R6P0,B3KS79,P01011	SERPINA3	47653	12	22	152	EQLSLLDR	K	F	0.99	55.4	27.4	26.1	45.8	0	8	0	0	2	973.531	5370.86	625524000	145	152
Mudpit_Aged L3 4 Anterior NP IAF	Serpin peptidase inhibitor, clade A (Alpha-1 antiproteinase, antitrypsin), member 3, isoform CRA_c OS=Homo sapiens GN=SERPINA3 PE=3 SV=1	A0A024R6P0,B3KS79,P01011	SERPINA3	47653	12	22	152	ITLLSALVETR	K	T	0.997	68.1	25	17.3	68.1	0	4	0	0	2	1215.73	9079.43	232257000	380	390
Mudpit_Aged L3 4 Anterior NP IAF	Serpin peptidase inhibitor, clade A (Alpha-1 antiproteinase, antitrypsin), member 3, isoform CRA_c OS=Homo sapiens GN=SERPINA3 PE=3 SV=1	A0A024R6P0,B3KS79,P01011	SERPINA3	47653	12	22	152	LYGSEAFATDFQDSAAAK	R	K	0.997	127	25	20.9	127	0	44	1	0	2	1891.87	7433.6	628534000	160	177
Mudpit_Aged L3 4 Anterior NP IAF	Serpin peptidase inhibitor, clade A (Alpha-1 antiproteinase, antitrypsin), member 3, isoform CRA_c OS=Homo sapiens GN=SERPINA3 PE=3 SV=1	A0A024R6P0,B3KS79,P01011	SERPINA3	47653	12	22	152	MEEVEAMLLPETLK	K	R	0.997	98.3	27.9	19.1	69.6	0	25	3	0	2	1648.82	8300.17	631422000	284	297
Mudpit_Aged L3 4 Anterior NP IAF	Serpin peptidase inhibitor, clade A (Alpha-1 antiproteinase, antitrypsin), member 3, isoform CRA_c OS=Homo sapiens GN=SERPINA3 PE=3 SV=1	A0A024R6P0,B3KS79,P01011	SERPINA3	47653	12	22	152	MEEVEAMLLPETLKR	K	W	0.995	65.2	28	17.1	65.2	0	0	2	0	2	1788.92	8977.47	47649600	284	298
Mudpit_Aged L3 4 Anterior NP IAF	Serpin peptidase inhibitor, clade A (Alpha-1 antiproteinase, antitrypsin), member 3, isoform CRA_c OS=Homo sapiens GN=SERPINA3 PE=3 SV=1	A0A024R6P0,B3KS79,P01011	SERPINA3	47653	12	22	152	NLAVSQVVHK	R	A	0.997	65	25	17.1	65	0	5	5	0	2	1094.63	5277.76	195835000	351	360
Mudpit_Aged L3 4 Anterior NP IAF	Serpin peptidase inhibitor, clade A (Alpha-1 antiproteinase, antitrypsin), member 3, isoform CRA_c OS=Homo sapiens GN=SERPINA3 PE=3 SV=1	A0A024R6P0,B3KS79,P01011	SERPINA3	47653	12	22	152	RLYGSEAFATDFQDSAAAK	K	K	0.996	57.9	25.4	16.6	57.9	0	0	1	0	2	2047.97	7700.48	8954210	159	177
Mudpit_Aged L3 4 Anterior NP IAF	Serpin peptidase inhibitor, clade A (Alpha-1 antiproteinase, antitrypsin), member 3, isoform CRA_c OS=Homo sapiens GN=SERPINA3 PE=3 SV=1	A0A024R6P0,B3KS79,P01011	SERPINA3	47653	12	22	152	WEMPFDPQDTHQSR	K	F	0.997	72.3	25	17.5	72.3	0	4	7	0	2	1773.77	7430.89	578974000	217	230
Mudpit_Aged L3 4 Anterior NP IAF	Epididymis secretory sperm binding protein Li 44a OS=Homo sapiens GN=SERPINA1 PE=2 SV=1	E9KL23,P01009	SERPINA1	46737.9	20	34	398	AVLTIDEK	K	G	0.99	61.6	27.5	18.3	60.2	0	10	0	0	2	888.504	3836.17	2271670000	360	367
Mudpit_Aged L3 4 Anterior NP IAF	Epididymis secretory sperm binding protein Li 44a OS=Homo sapiens GN=SERPINA1 PE=2 SV=1	E9KL23,P01009	SERPINA1	46737.9	20	34	398	DTEEEDFHVDQVTTVK	K	V	0.997	135	25	21.5	135	0	53	36	0	2	1891.86	6531.73	2590940000	226	241
Mudpit_Aged L3 4 Anterior NP IAF	Epididymis secretory sperm binding protein Li 44a OS=Homo sapiens GN=SERPINA1 PE=2 SV=1	E9KL23,P01009	SERPINA1	46737.9	20	34	398	DTVFALVNYIFFK	R	G	0.997	65.4	26.2	17.1	65.4	0	4	0	0	2	1576.84	9842.69	2951830	203	215
Mudpit_Aged L3 4 Anterior NP IAF	Epididymis secretory sperm binding protein Li 44a OS=Homo sapiens GN=SERPINA1 PE=2 SV=1	E9KL23,P01009	SERPINA1	46737.9	20	34	398	FNKPFVFLMIEQNTK	K	S	0.966	35.2	25.5	15.2	35.2	0	0	1	0	2	1855.98	9477.02	4559560	390	404
Mudpit_Aged L3 4 Anterior NP IAF	Epididymis secretory sperm binding protein Li 44a OS=Homo sapiens GN=SERPINA1 PE=2 SV=1	E9KL23,P01009	SERPINA1	46737.9	20	34	398	GTEAAGAMFLEAIPMSIPPEVK	K	F	0.997	88.2	30	18.5	71.8	0	17	9	0	2	2275.14	9295.08	675218000	368	389
Mudpit_Aged L3 4 Anterior NP IAF	Epididymis secretory sperm binding protein Li 44a OS=Homo sapiens GN=SERPINA1 PE=2 SV=1	E9KL23,P01009	SERPINA1	46737.9	20	34	398	ITPNLAEFAFSLYR	K	Q	0.997	42.5	27.1	15.7	42.5	0	1	0	0	2	1641.86	9353.64	20741000	50	63
Mudpit_Aged L3 4 Anterior NP IAF	Epididymis secretory sperm binding protein Li 44a OS=Homo sapiens GN=SERPINA1 PE=2 SV=1	E9KL23,P01009	SERPINA1	46737.9	20	34	398	KQINDYVEK	K	G	0.997	60.6	30.2	31.9	45.6	0	2	0	0	2	1136.59	3968.23	8433390	179	187
Mudpit_Aged L3 4 Anterior NP IAF	Epididymis secretory sperm binding protein Li 44a OS=Homo sapiens GN=SERPINA1 PE=2 SV=1	E9KL23,P01009	SERPINA1	46737.9	20	34	398	LQHLENELTHDIITK	K	F	0.997	84.2	25.7	18.3	84.2	0	14	41	18	2	1803.96	9463.84	3174970000	284	298
Mudpit_Aged L3 4 Anterior NP IAF	Epididymis secretory sperm binding protein Li 44a OS=Homo sapiens GN=SERPINA1 PE=2 SV=1	E9KL23,P01009	SERPINA1	46737.9	20	34	398	LSITGTYDLK	K	S	0.997	68.6	25.8	18.5	67.3	0	19	0	0	2	1110.6	5990.65	1963490000	315	324
Mudpit_Aged L3 4 Anterior NP IAF	Epididymis secretory sperm binding protein Li 44a OS=Homo sapiens GN=SERPINA1 PE=2 SV=1	E9KL23,P01009	SERPINA1	46737.9	20	34	398	LSSWVLLMK	K	Y	0.997	65.9	25	17.1	65.9	0	7	0	0	2	1076.62	7626.67	89600900	259	267
Mudpit_Aged L3 4 Anterior NP IAF	Epididymis secretory sperm binding protein Li 44a OS=Homo sapiens GN=SERPINA1 PE=2 SV=1	E9KL23,P01009	SERPINA1	46737.9	20	34	398	LYHSEAFTVNFGDTEEAK	K	K	0.997	119	25	20.4	119	0	35	52	0	2	2057.95	8332.07	2054890000	161	178
Mudpit_Aged L3 4 Anterior NP IAF	Epididymis secretory sperm binding protein Li 44a OS=Homo sapiens GN=SERPINA1 PE=2 SV=1	E9KL23,P01009	SERPINA1	46737.9	20	34	398	LYHSEAFTVNFGDTEEAKK	K	Q	0.997	104	25.7	19.5	104	0	2	5	5	2	2186.04	8300.29	259955000	161	179
Mudpit_Aged L3 4 Anterior NP IAF	Epididymis secretory sperm binding protein Li 44a OS=Homo sapiens GN=SERPINA1 PE=2 SV=1	E9KL23,P01009	SERPINA1	46737.9	20	34	398	QINDYVEK	K	G	0.99	50	26.7	22.1	44	0	5	0	0	2	1008.5	2689.27	231158000	180	187
Mudpit_Aged L3 4 Anterior NP IAF	Epididymis secretory sperm binding protein Li 44a OS=Homo sapiens GN=SERPINA1 PE=2 SV=1	E9KL23,P01009	SERPINA1	46737.9	20	34	398	SASLHLPK	R	L	0.99	56.7	25	16.5	56.7	0	7	0	0	2	852.494	5226.29	126992000	307	314
Mudpit_Aged L3 4 Anterior NP IAF	Epididymis secretory sperm binding protein Li 44a OS=Homo sapiens GN=SERPINA1 PE=2 SV=1	E9KL23,P01009	SERPINA1	46737.9	20	34	398	SVLGQLGITK	K	V	0.997	85.4	26.1	18.4	85.3	0	7	0	0	2	1015.61	6811.44	1050850000	325	334
Mudpit_Aged L3 4 Anterior NP IAF	Epididymis secretory sperm binding protein Li 44a OS=Homo sapiens GN=SERPINA1 PE=2 SV=1	E9KL23,P01009	SERPINA1	46737.9	20	34	398	TLNQPDSQLQLTTGNGLFLSEGLK	R	L	0.997	107	25.7	19.7	107	0	10	18	0	2	2574.34	9586.82	243077000	126	149
Mudpit_Aged L3 4 Anterior NP IAF	Epididymis secretory sperm binding protein Li 44a OS=Homo sapiens GN=SERPINA1 PE=2 SV=1	E9KL23,P01009	SERPINA1	46737.9	20	34	398	VFSNGADLSGVTEEAPLK	K	L	0.997	132	27.2	21.2	132	0	11	4	0	2	1833.92	6750.43	312499000	335	352
Mudpit_Aged L3 4 Anterior NP IAF	Epididymis secretory sperm binding protein Li 44a OS=Homo sapiens GN=SERPINA1 PE=2 SV=1	E9KL23,P01009	SERPINA1	46737.9	20	34	398	WERPFEVK	K	D	0.989	33.2	27.1	23.8	24.5	0	3	0	0	2	1090.57	5812.92	187199000	218	225
Mudpit_Aged L3 4 Anterior NP IAF	Epididymis secretory sperm binding protein Li 44a OS=Homo sapiens GN=SERPINA1 PE=2 SV=1	E9KL23,P01009	SERPINA1	46737.9	20	34	398	WERPFEVKDTEEEDFHVDQVTTVK	K	V	0.949	35	25	15.2	35	0	0	0	1	2	2963.41	9208.1	24877900	218	241
Mudpit_Aged L3 4 Anterior NP IAF	Epididymis secretory sperm binding protein Li 44a OS=Homo sapiens GN=SERPINA1 PE=2 SV=1	E9KL23,P01009	SERPINA1	46737.9	20	34	398	YLGNATAIFFLPDEGK	K	L	0.997	48.4	37.4	16	48.4	0	1	0	0	2	1755.9	9256.68	16315500	268	283
Mudpit_Aged L3 4 Anterior NP IAF	Serpin peptidase inhibitor, clade C (Antithrombin), member 1, isoform CRA_a OS=Homo sapiens GN=SERPINC1 PE=3 SV=1	A0A024R944,P01008	SERPINC1	52604.1	15	27	87	AFLEVNEEGSEAAASTAVVIAGR	K	S	0.997	169	27.6	23.6	169	0	11	8	0	2	2291.15	8428.32	128935000	403	425
Mudpit_Aged L3 4 Anterior NP IAF	Serpin peptidase inhibitor, clade C (Antithrombin), member 1, isoform CRA_a OS=Homo sapiens GN=SERPINC1 PE=3 SV=1	A0A024R944,P01008	SERPINC1	52604.1	15	27	87	ATEDEGSEQKIPEATNR	K	R	0.997	120	26.3	20.5	120	0	3	2	0	2	1874.87	2793.12	77555600	62	78
Mudpit_Aged L3 4 Anterior NP IAF	Serpin peptidase inhibitor, clade C (Antithrombin), member 1, isoform CRA_a OS=Homo sapiens GN=SERPINC1 PE=3 SV=1	A0A024R944,P01008	SERPINC1	52604.1	15	27	87	DDLYVSDAFHK	R	A	0.997	51.6	25.6	16.2	51.6	0	3	1	0	2	1309.61	5686.63	200066000	392	402
Mudpit_Aged L3 4 Anterior NP IAF	Serpin peptidase inhibitor, clade C (Antithrombin), member 1, isoform CRA_a OS=Homo sapiens GN=SERPINC1 PE=3 SV=1	A0A024R944,P01008	SERPINC1	52604.1	15	27	87	EQLQDMGLVDLFSPEK	K	S	0.997	94.9	26.4	18.9	94.9	0	11	1	0	2	1864.9	9214.71	204458000	365	380
Mudpit_Aged L3 4 Anterior NP IAF	Serpin peptidase inhibitor, clade C (Antithrombin), member 1, isoform CRA_a OS=Homo sapiens GN=SERPINC1 PE=3 SV=1	A0A024R944,P01008	SERPINC1	52604.1	15	27	87	EVPLNTIIFMGR	R	V	0.997	55.9	27.6	16.5	55.9	0	3	0	0	2	1405.75	9062.71	118944000	446	457
Mudpit_Aged L3 4 Anterior NP IAF	Serpin peptidase inhibitor, clade C (Antithrombin), member 1, isoform CRA_a OS=Homo sapiens GN=SERPINC1 PE=3 SV=1	A0A024R944,P01008	SERPINC1	52604.1	15	27	87	FATTFYQHLADSK	R	N	0.997	81.1	26.4	18.1	81.1	0	5	6	0	2	1528.74	8352.23	282317000	90	102
Mudpit_Aged L3 4 Anterior NP IAF	Serpin peptidase inhibitor, clade C (Antithrombin), member 1, isoform CRA_a OS=Homo sapiens GN=SERPINC1 PE=3 SV=1	A0A024R944,P01008	SERPINC1	52604.1	15	27	87	FRIEDGFSLK	R	E	0.986	44.6	25	15.8	44.6	0	0	1	0	2	1211.64	8397.8	4698830	355	364
Mudpit_Aged L3 4 Anterior NP IAF	Serpin peptidase inhibitor, clade C (Antithrombin), member 1, isoform CRA_a OS=Homo sapiens GN=SERPINC1 PE=3 SV=1	A0A024R944,P01008	SERPINC1	52604.1	15	27	87	GDDITMVLILPKPEK	K	S	0.997	68.2	25	17.3	68.2	0	0	5	0	2	1668.92	9082.53	51936400	308	322
Mudpit_Aged L3 4 Anterior NP IAF	Serpin peptidase inhibitor, clade C (Antithrombin), member 1, isoform CRA_a OS=Homo sapiens GN=SERPINC1 PE=3 SV=1	A0A024R944,P01008	SERPINC1	52604.1	15	27	87	IEDGFSLK	R	E	0.99	40.8	25.3	21.5	34.9	0	4	0	0	2	908.472	5083.85	130093000	357	364
Mudpit_Aged L3 4 Anterior NP IAF	Serpin peptidase inhibitor, clade C (Antithrombin), member 1, isoform CRA_a OS=Homo sapiens GN=SERPINC1 PE=3 SV=1	A0A024R944,P01008	SERPINC1	52604.1	15	27	87	KATEDEGSEQKIPEATNR	K	R	0.997	66.4	26.5	17.2	66.4	0	1	2	3	2	2002.97	5504.22	33802000	61	78
Mudpit_Aged L3 4 Anterior NP IAF	Serpin peptidase inhibitor, clade C (Antithrombin), member 1, isoform CRA_a OS=Homo sapiens GN=SERPINC1 PE=3 SV=1	A0A024R944,P01008	SERPINC1	52604.1	15	27	87	LPGIVAEGR	K	D	0.997	45.9	25	21.1	40.7	0	3	0	0	2	911.531	4271.23	39447700	383	391
Mudpit_Aged L3 4 Anterior NP IAF	Serpin peptidase inhibitor, clade C (Antithrombin), member 1, isoform CRA_a OS=Homo sapiens GN=SERPINC1 PE=3 SV=1	A0A024R944,P01008	SERPINC1	52604.1	15	27	87	NDNDNIFLSPLSISTAFAMTK	K	L	0.997	151	26.8	22.5	151	0	2	1	0	2	2299.13	9457.54	42458400	103	123
Mudpit_Aged L3 4 Anterior NP IAF	Serpin peptidase inhibitor, clade C (Antithrombin), member 1, isoform CRA_a OS=Homo sapiens GN=SERPINC1 PE=3 SV=1	A0A024R944,P01008	SERPINC1	52604.1	15	27	87	SKLPGIVAEGR	K	D	0.993	63.8	25	17	63.8	0	0	3	0	2	1126.66	6217.64	21680100	381	391
Mudpit_Aged L3 4 Anterior NP IAF	Serpin peptidase inhibitor, clade C (Antithrombin), member 1, isoform CRA_a OS=Homo sapiens GN=SERPINC1 PE=3 SV=1	A0A024R944,P01008	SERPINC1	52604.1	15	27	87	TSDQIHFFFAK	K	L	0.997	90.8	25.4	18.7	90.8	0	2	1	0	2	1340.66	8619.13	45613500	147	157
Mudpit_Aged L3 4 Anterior NP IAF	Serpin peptidase inhibitor, clade C (Antithrombin), member 1, isoform CRA_a OS=Homo sapiens GN=SERPINC1 PE=3 SV=1	A0A024R944,P01008	SERPINC1	52604.1	15	27	87	VAEGTQVLELPFK	R	G	0.997	108	25.7	19.7	108	0	5	0	0	2	1430.79	8665.47	194166000	295	307
Mudpit_Aged L3 4 Anterior NP IAF	Coagulation factor XIII A chain OS=Homo sapiens GN=F13A1 PE=1 SV=4	P00488	F13A1	83267.3	8	13	19	DGTHVVENVDATHIGK	K	L	0.997	63.6	26.1	17	63.6	0	1	1	1	2	1691.83	5494.04	33382400	448	463
Mudpit_Aged L3 4 Anterior NP IAF	Coagulation factor XIII A chain OS=Homo sapiens GN=F13A1 PE=1 SV=4	P00488	F13A1	83267.3	8	13	19	ETFDVTLEPLSFK	K	K	0.997	64.4	26.9	17	64.4	0	1	0	0	2	1525.78	9038.68	24955300	572	584
Mudpit_Aged L3 4 Anterior NP IAF	Coagulation factor XIII A chain OS=Homo sapiens GN=F13A1 PE=1 SV=4	P00488	F13A1	83267.3	8	13	19	GTYIPVPIVSELQSGK	K	W	0.985	30.2	26.6	14.9	30.2	0	1	0	0	2	1687.93	9157.15	32998500	115	130
Mudpit_Aged L3 4 Anterior NP IAF	Coagulation factor XIII A chain OS=Homo sapiens GN=F13A1 PE=1 SV=4	P00488	F13A1	83267.3	8	13	19	HVYGELDVQIQR	R	R	0.996	58.7	26	26.3	49.1	0	1	1	0	2	1456.75	6694.47	16830400	717	728
Mudpit_Aged L3 4 Anterior NP IAF	Coagulation factor XIII A chain OS=Homo sapiens GN=F13A1 PE=1 SV=4	P00488	F13A1	83267.3	8	13	19	LALETALMYGAK	R	K	0.996	39	25.6	15.4	39	0	1	0	0	2	1280.69	8534.16	20263600	493	504
Mudpit_Aged L3 4 Anterior NP IAF	Coagulation factor XIII A chain OS=Homo sapiens GN=F13A1 PE=1 SV=4	P00488	F13A1	83267.3	8	13	19	LIASMSSDSLR	K	H	0.997	65.9	25.9	19.8	63.2	0	7	0	0	2	1195.6	3200.67	22597000	706	716
Mudpit_Aged L3 4 Anterior NP IAF	Coagulation factor XIII A chain OS=Homo sapiens GN=F13A1 PE=1 SV=4	P00488	F13A1	83267.3	8	13	19	SNVDMDFEVENAVLGK	R	D	0.997	91.2	25.2	18.7	91.2	0	3	0	0	2	1766.83	8691.83	18189600	517	532
Mudpit_Aged L3 4 Anterior NP IAF	Coagulation factor XIII A chain OS=Homo sapiens GN=F13A1 PE=1 SV=4	P00488	F13A1	83267.3	8	13	19	STVLTIPEIIIK	K	V	0.996	34.2	25	15.1	34.2	0	1	0	0	2	1326.82	9231.41	28861600	625	636
Mudpit_Aged L3 4 Anterior NP IAF	Collagen alpha-2(XI) chain (Fragment) OS=Homo sapiens GN=COL11A2 PE=1 SV=1	A0A140T9I7_HUMAN		0	5	5	10	DFSLLTVVR	?	?	0.989	32.3	25.1	15	32.3	0	1	0	0	2	1049.6	9091.27	46481200	0	0
Mudpit_Aged L3 4 Anterior NP IAF	Collagen alpha-2(XI) chain (Fragment) OS=Homo sapiens GN=COL11A2 PE=1 SV=1	A0A140T9I7_HUMAN		0	5	5	10	FLYEDQTGRPQPPSQPVFR	?	?	0.951	33.6	26.7	15.1	33.6	0	0	1	0	2	2262.13	7795.46	8918920	0	0
Mudpit_Aged L3 4 Anterior NP IAF	Collagen alpha-2(XI) chain (Fragment) OS=Homo sapiens GN=COL11A2 PE=1 SV=1	A0A140T9I7_HUMAN		0	5	5	10	FPSLPDGVR	?	?	0.997	42	27.2	15.6	42	0	5	0	0	2	987.526	6487.29	35264900	0	0
Mudpit_Aged L3 4 Anterior NP IAF	Collagen alpha-2(XI) chain (Fragment) OS=Homo sapiens GN=COL11A2 PE=1 SV=1	A0A140T9I7_HUMAN		0	5	5	10	GANEDELSPETSPYVK	?	?	0.997	69.8	25.2	17.4	69.8	0	2	0	0	2	1735.8	5314.03	4899270	0	0
Mudpit_Aged L3 4 Anterior NP IAF	Collagen alpha-2(XI) chain (Fragment) OS=Homo sapiens GN=COL11A2 PE=1 SV=1	A0A140T9I7_HUMAN		0	5	5	10	GAPPVDVLR	?	?	0.997	39	25	15.4	39	0	1	0	0	2	923.531	4532.17	10602300	0	0
Mudpit_Aged L3 4 Anterior NP IAF	Chitinase 3-like 1 (Cartilage glycoprotein-39), isoform CRA_a OS=Homo sapiens GN=CHI3L1 PE=3 SV=1	A0A024R969,P36222	CHI3L1	42627	5	5	8	FSNTDYAVGYMLR	R	L	0.997	66.5	25	17.2	66.5	0	1	0	0	2	1536.72	8401.96	3231090	234	246
Mudpit_Aged L3 4 Anterior NP IAF	Chitinase 3-like 1 (Cartilage glycoprotein-39), isoform CRA_a OS=Homo sapiens GN=CHI3L1 PE=3 SV=1	A0A024R969,P36222	CHI3L1	42627	5	5	8	GNQWVGYDDQESVK	K	S	0.997	76.6	25	17.8	76.6	0	1	0	0	2	1624.72	4924.32	6150620	322	335
Mudpit_Aged L3 4 Anterior NP IAF	Chitinase 3-like 1 (Cartilage glycoprotein-39), isoform CRA_a OS=Homo sapiens GN=CHI3L1 PE=3 SV=1	A0A024R969,P36222	CHI3L1	42627	5	5	8	SFTLASSETGVGAPISGPGIPGR	R	F	0.997	104	25.8	20.5	103	0	2	0	0	2	2158.11	8090.75	5306650	264	286
Mudpit_Aged L3 4 Anterior NP IAF	Chitinase 3-like 1 (Cartilage glycoprotein-39), isoform CRA_a OS=Homo sapiens GN=CHI3L1 PE=3 SV=1	A0A024R969,P36222	CHI3L1	42627	5	5	8	TLLSVGGWNFGSQR	K	F	0.997	48.3	27.3	16	48.3	0	1	0	0	2	1521.78	8603.15	5509940	92	105
Mudpit_Aged L3 4 Anterior NP IAF	Chitinase 3-like 1 (Cartilage glycoprotein-39), isoform CRA_a OS=Homo sapiens GN=CHI3L1 PE=3 SV=1	A0A024R969,P36222	CHI3L1	42627	5	5	8	VTIDSSYDIAK	K	I	0.997	42.5	25.9	23.2	35	0	3	0	0	2	1211.62	4886.92	24004100	183	193
Mudpit_Aged L3 4 Anterior NP IAF	Thrombospondin-3 OS=Homo sapiens GN=THBS3 PE=1 SV=2	F5H4Z8,P49746,Q2HIZ0	THBS3	104200	3	3	4	AVTSVSGPGEHLR	K	N	0.993	63.3	27.3	17	63.3	0	0	1	0	2	1309.69	3767.13	18950100	834	846
Mudpit_Aged L3 4 Anterior NP IAF	Thrombospondin-3 OS=Homo sapiens GN=THBS3 PE=1 SV=2	F5H4Z8,P49746,Q2HIZ0	THBS3	104200	3	3	4	QTEQTYWQATPFR	K	A	0.997	69.5	25	17.3	69.5	0	2	0	0	2	1655.78	7540.96	11527700	811	823
Mudpit_Aged L3 4 Anterior NP IAF	Thrombospondin-3 OS=Homo sapiens GN=THBS3 PE=1 SV=2	F5H4Z8,P49746,Q2HIZ0	THBS3	104200	3	3	4	WLEASVVGK	R	I	0.946	27.3	28.9	14.7	27.3	0	1	0	0	2	988.546	6057.61	9339320	84	92
Mudpit_Aged L3 4 Anterior NP IAF	CP protein OS=Homo sapiens GN=CP PE=2 SV=1	A5PL27,P00450	CP	122208	21	36	140	AEEEHLGILGPQLHADVGDK	K	V	0.997	76.3	26.5	17.8	76.3	0	1	0	0	2	2128.07	9122.23	19471900	800	819
Mudpit_Aged L3 4 Anterior NP IAF	CP protein OS=Homo sapiens GN=CP PE=2 SV=1	A5PL27,P00450	CP	122208	21	36	140	ALYLQYTDETFR	K	T	0.997	81	26.2	18.1	81	0	7	0	0	2	1519.74	7334.93	241647000	70	81
Mudpit_Aged L3 4 Anterior NP IAF	CP protein OS=Homo sapiens GN=CP PE=2 SV=1	A5PL27,P00450	CP	122208	21	36	140	DDEEFIESNK	K	M	0.997	51.3	25	16.2	51.3	0	4	0	0	2	1225.52	3956.96	77091000	948	957
Mudpit_Aged L3 4 Anterior NP IAF	CP protein OS=Homo sapiens GN=CP PE=2 SV=1	A5PL27,P00450	CP	122208	21	36	140	DIFTGLIGPMK	K	I	0.997	64.4	27.5	17	64.4	0	6	0	0	2	1191.64	8586.03	288727000	548	558
Mudpit_Aged L3 4 Anterior NP IAF	CP protein OS=Homo sapiens GN=CP PE=2 SV=1	A5PL27,P00450	CP	122208	21	36	140	DVDKEFYLFPTVFDENESLLLEDNIR	K	M	0.97	43.2	26	15.7	43.2	0	0	1	0	2	3160.54	9853.67	380727	573	598
Mudpit_Aged L3 4 Anterior NP IAF	CP protein OS=Homo sapiens GN=CP PE=2 SV=1	A5PL27,P00450	CP	122208	21	36	140	EYTDASFTNR	R	K	0.997	53.7	25	16.4	53.7	0	4	0	0	2	1203.53	3388.07	378533000	427	436
Mudpit_Aged L3 4 Anterior NP IAF	CP protein OS=Homo sapiens GN=CP PE=2 SV=1	A5PL27,P00450	CP	122208	21	36	140	GAYPLSIEPIGVR	K	F	0.997	52.3	26.5	16.3	52.3	0	5	1	0	2	1371.76	8418.88	75498900	469	481
Mudpit_Aged L3 4 Anterior NP IAF	CP protein OS=Homo sapiens GN=CP PE=2 SV=1	A5PL27,P00450	CP	122208	21	36	140	GEFYIGSK	K	Y	0.976	29.3	25	14.8	29.3	0	2	0	0	2	900.446	4490.08	33203600	771	778
Mudpit_Aged L3 4 Anterior NP IAF	CP protein OS=Homo sapiens GN=CP PE=2 SV=1	A5PL27,P00450	CP	122208	21	36	140	GPEEEHLGILGPVIWAEVGDTIR	R	V	0.957	33.1	26.6	15.1	33.1	0	0	1	0	2	2487.29	10076.5	1049580	440	462
Mudpit_Aged L3 4 Anterior NP IAF	CP protein OS=Homo sapiens GN=CP PE=2 SV=1	A5PL27,P00450	CP	122208	21	36	140	GVYSSDVFDIFPGTYQTLEMFPR	R	T	0.997	119	25	20.5	119	0	5	4	0	2	2669.26	9473.89	83743700	1009	1031
Mudpit_Aged L3 4 Anterior NP IAF	CP protein OS=Homo sapiens GN=CP PE=2 SV=1	A5PL27,P00450	CP	122208	21	36	140	HYYIGIIETTWDYASDHGEK	K	K	0.997	90.5	25	18.7	90.5	0	1	25	0	2	2398.1	10244.5	17330300	23	42
Mudpit_Aged L3 4 Anterior NP IAF	CP protein OS=Homo sapiens GN=CP PE=2 SV=1	A5PL27,P00450	CP	122208	21	36	140	IYHSHIDAPK	R	D	0.984	45.3	26.8	15.8	45.3	0	0	3	0	2	1180.61	4734.69	17917600	178	187
Mudpit_Aged L3 4 Anterior NP IAF	CP protein OS=Homo sapiens GN=CP PE=2 SV=1	A5PL27,P00450	CP	122208	21	36	140	LISVDTEHSNIYLQNGPDR	K	I	0.997	155	26.8	22.7	155	0	2	2	0	2	2171.07	6173.95	57883700	44	62
Mudpit_Aged L3 4 Anterior NP IAF	CP protein OS=Homo sapiens GN=CP PE=2 SV=1	A5PL27,P00450	CP	122208	21	36	140	MFTTAPDQVDKEDEDFQESNK	R	M	0.997	97.7	25	19.1	97.7	0	5	12	0	2	2490.06	5796.63	225676000	599	619
Mudpit_Aged L3 4 Anterior NP IAF	CP protein OS=Homo sapiens GN=CP PE=2 SV=1	A5PL27,P00450	CP	122208	21	36	140	MYSVNGYTFGSLPGLSMCAEDR	R	V	0.997	67.1	25	17.2	67.1	0	4	0	0	2	2472.05	9159.74	86903400	259	280
Mudpit_Aged L3 4 Anterior NP IAF	CP protein OS=Homo sapiens GN=CP PE=2 SV=1	A5PL27,P00450	CP	122208	21	36	140	MYYSAVDPTK	K	D	0.997	56.5	25	16.5	56.5	0	12	0	0	2	1190.54	3776.52	89162500	538	547
Mudpit_Aged L3 4 Anterior NP IAF	CP protein OS=Homo sapiens GN=CP PE=2 SV=1	A5PL27,P00450	CP	122208	21	36	140	NNEGTYYSPNYNPQSR	K	S	0.997	106	25	19.6	106	0	4	1	0	2	1903.82	4026.13	40515100	485	500
Mudpit_Aged L3 4 Anterior NP IAF	CP protein OS=Homo sapiens GN=CP PE=2 SV=1	A5PL27,P00450	CP	122208	21	36	140	QSEDSTFYLGER	R	T	0.997	87	25	18.5	86.9	0	8	0	0	2	1431.64	5456.48	123364000	721	732
Mudpit_Aged L3 4 Anterior NP IAF	CP protein OS=Homo sapiens GN=CP PE=2 SV=1	A5PL27,P00450	CP	122208	21	36	140	SGAGTEDSACIPWAYYSTVDQVK	R	D	0.997	58.9	25	16.7	58.9	0	1	0	0	2	2506.11	8164.29	4177330	865	887
Mudpit_Aged L3 4 Anterior NP IAF	CP protein OS=Homo sapiens GN=CP PE=2 SV=1	A5PL27,P00450	CP	122208	21	36	140	SVPPSASHVAPTETFTYEWTVPK	R	E	0.984	40.5	25.9	15.5	40.5	0	0	2	0	2	2531.25	9116.16	41139900	501	523
Mudpit_Aged L3 4 Anterior NP IAF	CP protein OS=Homo sapiens GN=CP PE=2 SV=1	A5PL27,P00450	CP	122208	21	36	140	TTIEKPVWLGFLGPIIK	R	A	0.996	58.4	25	16.6	58.4	0	1	16	0	2	1912.13	9993.6	19136400	82	98
Mudpit_Aged L3 4 Anterior NP IAF	Putative uncharacterized protein DKFZp686O12165 (Fragment) OS=Homo sapiens GN=DKFZp686O12165 PE=1 SV=1	Q6MZM7	DKFZp686O12165	240636	2	2	23	ATGVFTTLQPGSSIPPYNTEVTETTIVITWTPAPR	K	I	0.997	104	25	19.5	104	0	0	34	20	2	3745.93	9994.58	410360000	825	859
Mudpit_Aged L3 4 Anterior NP IAF	Putative uncharacterized protein DKFZp686O12165 (Fragment) OS=Homo sapiens GN=DKFZp686O12165 PE=1 SV=1	Q6MZM7	DKFZp686O12165	240636	2	2	23	DDKESVPISDTIIPEVPQLTDLSFVDITDSSIGLR	K	W	0.997	72	25	17.5	72	0	0	21	0	2	3814.95	9706.74	41818100	999	1033
Mudpit_Aged L3 4 Anterior NP IAF	Putative uncharacterized protein DKFZp686O12165 (Fragment) OS=Homo sapiens GN=DKFZp686O12165 PE=1 SV=1	Q6MZM7	DKFZp686O12165	240636	2	2	23	DLEVVAATPTSLLISWDAPAVTVR	R	Y	0.997	128	25	21	128	0	7	3	0	2	2524.37	9455.82	166488000	1291	1314
Mudpit_Aged L3 4 Anterior NP IAF	Putative uncharacterized protein DKFZp686O12165 (Fragment) OS=Homo sapiens GN=DKFZp686O12165 PE=1 SV=1	Q6MZM7	DKFZp686O12165	240636	2	2	23	DLQFVEVTDVK	R	V	0.997	81	26.8	18.1	81	0	57	0	0	2	1292.67	7595.36	13744500000	659	669
Mudpit_Aged L3 4 Anterior NP IAF	Putative uncharacterized protein DKFZp686O12165 (Fragment) OS=Homo sapiens GN=DKFZp686O12165 PE=1 SV=1	Q6MZM7	DKFZp686O12165	240636	2	2	23	EATIPGHLNSYTIK	K	G	0.997	63.6	27.3	19.4	61.1	0	16	12	0	2	1543.81	7430.29	5925140000	403	416
Mudpit_Aged L3 4 Anterior NP IAF	Putative uncharacterized protein DKFZp686O12165 (Fragment) OS=Homo sapiens GN=DKFZp686O12165 PE=1 SV=1	Q6MZM7	DKFZp686O12165	240636	2	2	23	EESPLLIGQQSTVSDVPR	R	D	0.997	129	27	23.2	126	0	27	13	0	2	1955.01	7031.62	12327300000	1273	1290
Mudpit_Aged L3 4 Anterior NP IAF	Putative uncharacterized protein DKFZp686O12165 (Fragment) OS=Homo sapiens GN=DKFZp686O12165 PE=1 SV=1	Q6MZM7	DKFZp686O12165	240636	2	2	23	EEVVTVGNSVNEGLNQPTDDSCFDPYTVSHYAVGDEWER	R	M	0.995	80.9	25	18.1	80.9	0	0	4	2	2	4415.92	9029.03	101623000	1992	2030
Mudpit_Aged L3 4 Anterior NP IAF	Putative uncharacterized protein DKFZp686O12165 (Fragment) OS=Homo sapiens GN=DKFZp686O12165 PE=1 SV=1	Q6MZM7	DKFZp686O12165	240636	2	2	23	EINLAPDSSSVVVSGLMVATK	K	Y	0.997	108	27.2	19.8	108	0	94	42	0	2	2117.12	9294.13	2860950000	1605	1625
Mudpit_Aged L3 4 Anterior NP IAF	Putative uncharacterized protein DKFZp686O12165 (Fragment) OS=Homo sapiens GN=DKFZp686O12165 PE=1 SV=1	Q6MZM7	DKFZp686O12165	240636	2	2	23	ESKPLTAQQTTK	R	L	0.997	62.8	27.8	16.9	62.8	0	1	4	0	2	1331.72	2178.36	42123400	732	743
Mudpit_Aged L3 4 Anterior NP IAF	Putative uncharacterized protein DKFZp686O12165 (Fragment) OS=Homo sapiens GN=DKFZp686O12165 PE=1 SV=1	Q6MZM7	DKFZp686O12165	240636	2	2	23	ESVPISDTIIPEVPQLTDLSFVDITDSSIGLR	K	W	0.995	66.7	25.1	17.2	66.7	0	0	2	0	2	3456.8	9508.14	21369800	1002	1033
Mudpit_Aged L3 4 Anterior NP IAF	Putative uncharacterized protein DKFZp686O12165 (Fragment) OS=Homo sapiens GN=DKFZp686O12165 PE=1 SV=1	Q6MZM7	DKFZp686O12165	240636	2	2	23	EVTSDSGSIVVSGLTPGVEYVYTIQVLR	R	D	0.997	123	25.1	20.7	123	0	28	13	1	2	2968.55	9696.24	742391000	877	904
Mudpit_Aged L3 4 Anterior NP IAF	Putative uncharacterized protein DKFZp686O12165 (Fragment) OS=Homo sapiens GN=DKFZp686O12165 PE=1 SV=1	Q6MZM7	DKFZp686O12165	240636	2	2	23	FLATTPNSLLVSWQPPR	R	A	0.997	95.6	25.8	19	95.6	0	2	1	0	2	1927.04	9093.1	471937000	1749	1765
Mudpit_Aged L3 4 Anterior NP IAF	Putative uncharacterized protein DKFZp686O12165 (Fragment) OS=Homo sapiens GN=DKFZp686O12165 PE=1 SV=1	Q6MZM7	DKFZp686O12165	240636	2	2	23	FTNIGPDTMR	R	V	0.997	52.8	25	16.3	52.8	0	91	0	0	2	1151.55	4334.94	11680000000	1113	1122
Mudpit_Aged L3 4 Anterior NP IAF	Putative uncharacterized protein DKFZp686O12165 (Fragment) OS=Homo sapiens GN=DKFZp686O12165 PE=1 SV=1	Q6MZM7	DKFZp686O12165	240636	2	2	23	FTQVTPTSLSAQWTPPNVQLTGYR	K	V	0.997	92	25.3	18.8	92	0	5	9	1	2	2692.37	9055.56	2128500000	1568	1591
Mudpit_Aged L3 4 Anterior NP IAF	Putative uncharacterized protein DKFZp686O12165 (Fragment) OS=Homo sapiens GN=DKFZp686O12165 PE=1 SV=1	Q6MZM7	DKFZp686O12165	240636	2	2	23	GATYNIIVEALK	R	D	0.997	63.9	25	17	63.9	0	10	3	0	2	1291.73	9107.44	579073000	1972	1983
Mudpit_Aged L3 4 Anterior NP IAF	Putative uncharacterized protein DKFZp686O12165 (Fragment) OS=Homo sapiens GN=DKFZp686O12165 PE=1 SV=1	Q6MZM7	DKFZp686O12165	240636	2	2	23	GATYNIIVEALKDQQR	R	H	0.997	102	25.7	19.4	102	0	4	12	0	2	1818.97	9331.56	341526000	1972	1987
Mudpit_Aged L3 4 Anterior NP IAF	Putative uncharacterized protein DKFZp686O12165 (Fragment) OS=Homo sapiens GN=DKFZp686O12165 PE=1 SV=1	Q6MZM7	DKFZp686O12165	240636	2	2	23	GDSPASSKPISINYR	R	T	0.997	92.3	27.6	18.8	92.3	0	23	14	0	2	1591.81	4859.99	1881130000	1363	1377
Mudpit_Aged L3 4 Anterior NP IAF	Putative uncharacterized protein DKFZp686O12165 (Fragment) OS=Homo sapiens GN=DKFZp686O12165 PE=1 SV=1	Q6MZM7	DKFZp686O12165	240636	2	2	23	GEWTCIAYSQLR	R	D	0.997	44.6	25	15.8	44.6	0	1	0	0	2	1484.68	7637.2	49831800	251	262
Mudpit_Aged L3 4 Anterior NP IAF	Putative uncharacterized protein DKFZp686O12165 (Fragment) OS=Homo sapiens GN=DKFZp686O12165 PE=1 SV=1	Q6MZM7	DKFZp686O12165	240636	2	2	23	GLAFTDVDVDSIK	K	I	0.997	74.4	27.8	17.7	74.4	0	5	0	0	2	1379.71	7826.83	79769400	1475	1487
Mudpit_Aged L3 4 Anterior NP IAF	Putative uncharacterized protein DKFZp686O12165 (Fragment) OS=Homo sapiens GN=DKFZp686O12165 PE=1 SV=1	Q6MZM7	DKFZp686O12165	240636	2	2	23	GLKPGVVYEGQLISIQQYGHQEVTR	K	F	0.997	101	25	19.3	101	0	0	16	18	2	2799.48	9464.82	1122900000	417	441
Mudpit_Aged L3 4 Anterior NP IAF	Putative uncharacterized protein DKFZp686O12165 (Fragment) OS=Homo sapiens GN=DKFZp686O12165 PE=1 SV=1	Q6MZM7	DKFZp686O12165	240636	2	2	23	IAWESPQGQVSR	K	Y	0.997	54.2	26.4	16.4	54.2	0	2	0	0	2	1357.69	4855.33	12330000	1488	1499
Mudpit_Aged L3 4 Anterior NP IAF	Putative uncharacterized protein DKFZp686O12165 (Fragment) OS=Homo sapiens GN=DKFZp686O12165 PE=1 SV=1	Q6MZM7	DKFZp686O12165	240636	2	2	23	ITYGETGGNSPVQEFTVPGSK	R	S	0.997	130	26	21.1	130	0	36	18	0	2	2168.05	6903.25	8733760000	1318	1338
Mudpit_Aged L3 4 Anterior NP IAF	Putative uncharacterized protein DKFZp686O12165 (Fragment) OS=Homo sapiens GN=DKFZp686O12165 PE=1 SV=1	Q6MZM7	DKFZp686O12165	240636	2	2	23	IYLYTLNDNAR	K	S	0.997	74.8	26.6	27.7	64.8	0	18	4	0	2	1355.7	6746.33	2165960000	1719	1729
Mudpit_Aged L3 4 Anterior NP IAF	Putative uncharacterized protein DKFZp686O12165 (Fragment) OS=Homo sapiens GN=DKFZp686O12165 PE=1 SV=1	Q6MZM7	DKFZp686O12165	240636	2	2	23	LDAPTNLQFVNETDSTVLVR	K	W	0.992	49	26.4	16.1	49	0	0	1	0	2	2232.15	8558.47	4726120	744	763
Mudpit_Aged L3 4 Anterior NP IAF	Putative uncharacterized protein DKFZp686O12165 (Fragment) OS=Homo sapiens GN=DKFZp686O12165 PE=1 SV=1	Q6MZM7	DKFZp686O12165	240636	2	2	23	LGVRPSQGGEAPR	K	E	0.997	59.4	26.3	16.7	59.4	0	4	6	0	2	1323.71	3222.26	2713640000	864	876
Mudpit_Aged L3 4 Anterior NP IAF	Putative uncharacterized protein DKFZp686O12165 (Fragment) OS=Homo sapiens GN=DKFZp686O12165 PE=1 SV=1	Q6MZM7	DKFZp686O12165	240636	2	2	23	NEEDVAELSISPSDNAVVLTNLLPGTEYVVSVSSVYEQHESTPLR	K	G	0.978	49.2	25	16.1	49.2	0	0	0	4	2	4887.41	10138.1	4768200	1145	1189
Mudpit_Aged L3 4 Anterior NP IAF	Putative uncharacterized protein DKFZp686O12165 (Fragment) OS=Homo sapiens GN=DKFZp686O12165 PE=1 SV=1	Q6MZM7	DKFZp686O12165	240636	2	2	23	NLQPASEYTVSLVAIK	R	G	0.997	100	26	20.1	99.4	0	78	23	0	2	1732.95	8640.86	11600100000	802	817
Mudpit_Aged L3 4 Anterior NP IAF	Putative uncharacterized protein DKFZp686O12165 (Fragment) OS=Homo sapiens GN=DKFZp686O12165 PE=1 SV=1	Q6MZM7	DKFZp686O12165	240636	2	2	23	NSITLTNLTPGTEYVVSIVALNGR	R	E	0.997	104	25	19.5	104	0	3	1	0	2	2532.37	9307.34	160360000	1249	1272
Mudpit_Aged L3 4 Anterior NP IAF	Putative uncharacterized protein DKFZp686O12165 (Fragment) OS=Homo sapiens GN=DKFZp686O12165 PE=1 SV=1	Q6MZM7	DKFZp686O12165	240636	2	2	23	NTFAEVTGLSPGVTYYFK	R	V	0.997	129	26.9	21	129	0	17	4	0	2	1993.99	9218.9	4519200000	706	723
Mudpit_Aged L3 4 Anterior NP IAF	Putative uncharacterized protein DKFZp686O12165 (Fragment) OS=Homo sapiens GN=DKFZp686O12165 PE=1 SV=1	Q6MZM7	DKFZp686O12165	240636	2	2	23	QDGHLWCSTTSNYEQDQK	R	Y	0.997	93.9	25	18.9	93.9	0	17	11	0	2	2197.91	5194	306241000	127	144
Mudpit_Aged L3 4 Anterior NP IAF	Putative uncharacterized protein DKFZp686O12165 (Fragment) OS=Homo sapiens GN=DKFZp686O12165 PE=1 SV=1	Q6MZM7	DKFZp686O12165	240636	2	2	23	QGENGQMMSCTCLGNGK	R	G	0.997	53.5	25	16.3	53.5	0	59	0	0	2	1873.72	2985.75	588745000	2074	2090
Mudpit_Aged L3 4 Anterior NP IAF	Putative uncharacterized protein DKFZp686O12165 (Fragment) OS=Homo sapiens GN=DKFZp686O12165 PE=1 SV=1	Q6MZM7	DKFZp686O12165	240636	2	2	23	QYNVGPSVSK	R	Y	0.997	60.7	28.3	19.9	57.6	0	18	0	0	2	1078.55	2652.77	1573010000	788	797
Mudpit_Aged L3 4 Anterior NP IAF	Putative uncharacterized protein DKFZp686O12165 (Fragment) OS=Homo sapiens GN=DKFZp686O12165 PE=1 SV=1	Q6MZM7	DKFZp686O12165	240636	2	2	23	SDTVPSPR	R	D	0.99	39.5	25	32	22.9	0	4	0	0	2	858.432	1844.89	8881150	651	658
Mudpit_Aged L3 4 Anterior NP IAF	Putative uncharacterized protein DKFZp686O12165 (Fragment) OS=Homo sapiens GN=DKFZp686O12165 PE=1 SV=1	Q6MZM7	DKFZp686O12165	240636	2	2	23	SDTVPSPRDLQFVEVTDVK	R	V	0.997	49	26.5	16.1	49	0	1	0	0	2	2132.09	8283.5	7856080	651	669
Mudpit_Aged L3 4 Anterior NP IAF	Putative uncharacterized protein DKFZp686O12165 (Fragment) OS=Homo sapiens GN=DKFZp686O12165 PE=1 SV=1	Q6MZM7	DKFZp686O12165	240636	2	2	23	SSPVVIDASTAIDAPSNLR	R	F	0.997	131	26.4	21.2	131	0	90	34	0	2	1913	7294.81	18782400000	1730	1748
Mudpit_Aged L3 4 Anterior NP IAF	Putative uncharacterized protein DKFZp686O12165 (Fragment) OS=Homo sapiens GN=DKFZp686O12165 PE=1 SV=1	Q6MZM7	DKFZp686O12165	240636	2	2	23	STTPDITGYR	R	I	0.997	57.4	25	20	54	0	33	0	0	2	1110.54	3842.08	11819800000	945	954
Mudpit_Aged L3 4 Anterior NP IAF	Putative uncharacterized protein DKFZp686O12165 (Fragment) OS=Homo sapiens GN=DKFZp686O12165 PE=1 SV=1	Q6MZM7	DKFZp686O12165	240636	2	2	23	SYTITGLQPGTDYK	R	I	0.997	87.3	25.8	25.8	80	0	20	1	0	2	1543.76	6131.39	10360700000	1705	1718
Mudpit_Aged L3 4 Anterior NP IAF	Putative uncharacterized protein DKFZp686O12165 (Fragment) OS=Homo sapiens GN=DKFZp686O12165 PE=1 SV=1	Q6MZM7	DKFZp686O12165	240636	2	2	23	TDELPQLVTLPHPNLHGPEILDVPSTVQK	K	T	0.993	50.9	25	16.2	50.9	0	0	8	1	2	3187.7	9548.61	233833000	1829	1857
Mudpit_Aged L3 4 Anterior NP IAF	Putative uncharacterized protein DKFZp686O12165 (Fragment) OS=Homo sapiens GN=DKFZp686O12165 PE=1 SV=1	Q6MZM7	DKFZp686O12165	240636	2	2	23	TEIDKPSQMQVTDVQDNSISVK	R	W	0.997	129	26.6	21.1	129	0	44	110	0	2	2462.21	6112.87	4465340000	1378	1399
Mudpit_Aged L3 4 Anterior NP IAF	Putative uncharacterized protein DKFZp686O12165 (Fragment) OS=Homo sapiens GN=DKFZp686O12165 PE=1 SV=1	Q6MZM7	DKFZp686O12165	240636	2	2	23	TETITGFQVDAVPANGQTPIQR	K	T	0.997	138	26.6	21.7	138	0	3	1	0	2	2343.19	7621.31	190741000	1676	1697
Mudpit_Aged L3 4 Anterior NP IAF	Putative uncharacterized protein DKFZp686O12165 (Fragment) OS=Homo sapiens GN=DKFZp686O12165 PE=1 SV=1	Q6MZM7	DKFZp686O12165	240636	2	2	23	TFYSCTTEGR	R	Q	0.991	33.3	25	15.1	33.3	0	1	0	0	2	1222.5	3295.13	9985570	117	126
Mudpit_Aged L3 4 Anterior NP IAF	Putative uncharacterized protein DKFZp686O12165 (Fragment) OS=Homo sapiens GN=DKFZp686O12165 PE=1 SV=1	Q6MZM7	DKFZp686O12165	240636	2	2	23	TGLDSPTGIDFSDITANSFTVHWIAPR	K	A	0.997	99.7	25.9	19.2	99.7	0	0	114	1	2	2918.43	10059.1	501794000	1194	1220
Mudpit_Aged L3 4 Anterior NP IAF	Putative uncharacterized protein DKFZp686O12165 (Fragment) OS=Homo sapiens GN=DKFZp686O12165 PE=1 SV=1	Q6MZM7	DKFZp686O12165	240636	2	2	23	TNTNVNCPIECFMPLDVQADR	R	E	0.997	87.9	25	18.5	87.9	0	1	0	0	2	2496.08	9126.49	3846520	2168	2188
Mudpit_Aged L3 4 Anterior NP IAF	Putative uncharacterized protein DKFZp686O12165 (Fragment) OS=Homo sapiens GN=DKFZp686O12165 PE=1 SV=1	Q6MZM7	DKFZp686O12165	240636	2	2	23	TNTNVNCPIECFMPLDVQADREDSRE	R	-	0.994	56.8	25	16.5	56.8	0	0	4	0	2	3112.33	8357.35	27767200	2168	2193
Mudpit_Aged L3 4 Anterior NP IAF	Putative uncharacterized protein DKFZp686O12165 (Fragment) OS=Homo sapiens GN=DKFZp686O12165 PE=1 SV=1	Q6MZM7	DKFZp686O12165	240636	2	2	23	TPFVTHPGYDTGNGIQLPGTSGQQPSVGQQMIFEEHGFR	K	R	0.985	52.4	25.8	16.3	52.4	0	0	0	1	2	4215	9346.27	16139200	1858	1896
Mudpit_Aged L3 4 Anterior NP IAF	Putative uncharacterized protein DKFZp686O12165 (Fragment) OS=Homo sapiens GN=DKFZp686O12165 PE=1 SV=1	Q6MZM7	DKFZp686O12165	240636	2	2	23	TTPPTTATPIR	R	H	0.997	49.2	25.3	16.1	49.2	0	9	0	0	2	1155.64	2789.16	112246000	1898	1908
Mudpit_Aged L3 4 Anterior NP IAF	Putative uncharacterized protein DKFZp686O12165 (Fragment) OS=Homo sapiens GN=DKFZp686O12165 PE=1 SV=1	Q6MZM7	DKFZp686O12165	240636	2	2	23	TYHVGEQWQK	K	E	0.997	42.9	25	15.7	42.9	0	6	2	0	2	1275.61	4708.42	998646000	2108	2117
Mudpit_Aged L3 4 Anterior NP IAF	Putative uncharacterized protein DKFZp686O12165 (Fragment) OS=Homo sapiens GN=DKFZp686O12165 PE=1 SV=1	Q6MZM7	DKFZp686O12165	240636	2	2	23	VDVIPVNLPGEHGQR	R	L	0.997	90.6	26.6	18.7	90.6	0	33	39	0	2	1629.87	7249.27	32558600000	686	700
Mudpit_Aged L3 4 Anterior NP IAF	Putative uncharacterized protein DKFZp686O12165 (Fragment) OS=Homo sapiens GN=DKFZp686O12165 PE=1 SV=1	Q6MZM7	DKFZp686O12165	240636	2	2	23	VEYELSEEGDEPQYLDLPSTATSVNIPDLLPGR	R	K	0.997	121	25.7	20.6	121	0	0	35	9	2	3646.77	10049.3	796515000	499	531
Mudpit_Aged L3 4 Anterior NP IAF	Putative uncharacterized protein DKFZp686O12165 (Fragment) OS=Homo sapiens GN=DKFZp686O12165 PE=1 SV=1	Q6MZM7	DKFZp686O12165	240636	2	2	23	VEYELSEEGDEPQYLDLPSTATSVNIPDLLPGRK	R	Y	0.996	64	25	17	64	0	0	9	3	2	3774.86	9509.58	236558000	499	532
Mudpit_Aged L3 4 Anterior NP IAF	Putative uncharacterized protein DKFZp686O12165 (Fragment) OS=Homo sapiens GN=DKFZp686O12165 PE=1 SV=1	Q6MZM7	DKFZp686O12165	240636	2	2	23	VPGTSTSATLTGLTR	R	G	0.997	88.5	25.8	18.5	88.5	0	29	2	0	2	1461.79	5661.75	3007130000	1957	1971
Mudpit_Aged L3 4 Anterior NP IAF	Putative uncharacterized protein DKFZp686O12165 (Fragment) OS=Homo sapiens GN=DKFZp686O12165 PE=1 SV=1	Q6MZM7	DKFZp686O12165	240636	2	2	23	VREEVVTVGNSVNEGLNQPTDDSCFDPYTVSHYAVGDEWER	K	M	0.986	53.6	25	16.4	53.6	0	0	0	4	2	4671.09	9204.71	157226000	1990	2030
Mudpit_Aged L3 4 Anterior NP IAF	Putative uncharacterized protein DKFZp686O12165 (Fragment) OS=Homo sapiens GN=DKFZp686O12165 PE=1 SV=1	Q6MZM7	DKFZp686O12165	240636	2	2	23	VTDATETTITISWR	R	T	0.997	125	32	35.8	110	0	162	21	0	2	1593.81	8449.54	3775430000	1660	1673
Mudpit_Aged L3 4 Anterior NP IAF	Putative uncharacterized protein DKFZp686O12165 (Fragment) OS=Homo sapiens GN=DKFZp686O12165 PE=1 SV=1	Q6MZM7	DKFZp686O12165	240636	2	2	23	VTIMWTPPESAVTGYR	K	V	0.997	92.3	27.5	18.8	92.3	0	114	59	0	2	1823.9	8349.98	19710900000	670	685
Mudpit_Aged L3 4 Anterior NP IAF	Putative uncharacterized protein DKFZp686O12165 (Fragment) OS=Homo sapiens GN=DKFZp686O12165 PE=1 SV=1	Q6MZM7	DKFZp686O12165	240636	2	2	23	VTWAPPPSIDLTNFLVR	R	Y	0.997	82.5	25.7	18.2	82.5	0	10	15	0	2	1926.05	10041.2	9189450000	1123	1139
Mudpit_Aged L3 4 Anterior NP IAF	Putative uncharacterized protein DKFZp686O12165 (Fragment) OS=Homo sapiens GN=DKFZp686O12165 PE=1 SV=1	Q6MZM7	DKFZp686O12165	240636	2	2	23	VVTPLSPPTNLHLEANPDTGVLTVSWER	K	S	0.997	103	25	19.4	103	0	0	49	5	2	3042.59	9773.3	4813670000	917	944
Mudpit_Aged L3 4 Anterior NP IAF	Putative uncharacterized protein DKFZp686O12165 (Fragment) OS=Homo sapiens GN=DKFZp686O12165 PE=1 SV=1	Q6MZM7	DKFZp686O12165	240636	2	2	23	WCGTTQNYDADQK	K	F	0.997	74.3	25	17.6	74.3	0	18	0	0	2	1587.64	3100.47	246932000	192	204
Mudpit_Aged L3 4 Anterior NP IAF	Putative uncharacterized protein DKFZp686O12165 (Fragment) OS=Homo sapiens GN=DKFZp686O12165 PE=1 SV=1	Q6MZM7	DKFZp686O12165	240636	2	2	23	WLPSSSPVTGYR	K	V	0.997	53.3	27.3	16.4	53.2	0	19	0	0	2	1349.68	6383	3463540000	1400	1411
Mudpit_Aged L3 4 Anterior NP IAF	Putative uncharacterized protein DKFZp686O12165 (Fragment) OS=Homo sapiens GN=DKFZp686O12165 PE=1 SV=1	Q6MZM7	DKFZp686O12165	240636	2	2	23	WSRPQAPITGYR	R	I	0.987	37.2	26.6	15.3	37.2	0	1	3	0	2	1431.75	5433.78	92251500	578	589
Mudpit_Aged L3 4 Anterior NP IAF	Putative uncharacterized protein DKFZp686O12165 (Fragment) OS=Homo sapiens GN=DKFZp686O12165 PE=1 SV=1	Q6MZM7	DKFZp686O12165	240636	2	2	23	YEVSVYALK	K	D	0.997	52.5	26.1	16.3	52.5	0	21	0	0	2	1071.57	6095.51	4221230000	1626	1634
Mudpit_Aged L3 4 Anterior NP IAF	Putative uncharacterized protein DKFZp686O12165 (Fragment) OS=Homo sapiens GN=DKFZp686O12165 PE=1 SV=1	Q6MZM7	DKFZp686O12165	240636	2	2	23	YIVNVYQISEDGEQSLILSTSQTTAPDAPPDPTVDQVDDTSIVVR	K	W	0.997	116	25	20.2	116	0	0	0	37	2	4876.39	9946.13	405238000	533	577
Mudpit_Aged L3 4 Anterior NP IAF	Putative uncharacterized protein DKFZp686O12165 (Fragment) OS=Homo sapiens GN=DKFZp686O12165 PE=1 SV=1	Q6MZM7	DKFZp686O12165	240636	2	2	23	YSFCTDHTVLVQTR	K	G	0.955	24.1	25	14.5	24.1	0	1	0	0	2	1727.81	6276.1	11999700	145	158
Mudpit_Aged L3 4 Anterior NP IAF	Apolipoprotein L, 1, isoform CRA_b OS=Homo sapiens GN=APOL1 PE=4 SV=1	A0A024R1G8,A0A024R1Q4,A0A1P8SD62_HUMAN,A5PL32,B4DNT5,B4E1N5,O14791,Q1WWL5,Q29RW7,Q2KHQ6,U5LGU2,U5LH96,U5LI90,U5LII8,U5LKC6,U5LKM6	APOL1	43975.3	6	8	14	EFLGENISNFLSLAGNTYQLTR	R	G	0.997	156	27	22.7	0	0	1	1	0	2	2487.25	9432.73	22739800	256	277
Mudpit_Aged L3 4 Anterior NP IAF	Apolipoprotein L, 1, isoform CRA_b OS=Homo sapiens GN=APOL1 PE=4 SV=1	A0A024R1G8,A0A024R1Q4,A0A1P8SD62_HUMAN,A5PL32,B4DNT5,B4E1N5,O14791,Q1WWL5,Q29RW7,Q2KHQ6,U5LGU2,U5LH96,U5LI90,U5LII8,U5LKC6,U5LKM6	APOL1	43975.3	6	8	14	ILQADQEL	K	-	0.99	44.2	28.4	15.8	44.2	0	1	0	0	2	929.494	5344.11	5084980	391	398
Mudpit_Aged L3 4 Anterior NP IAF	Apolipoprotein L, 1, isoform CRA_b OS=Homo sapiens GN=APOL1 PE=4 SV=1	A0A024R1G8,A0A024R1Q4,A0A1P8SD62_HUMAN,A5PL32,B4DNT5,B4E1N5,O14791,Q1WWL5,Q29RW7,Q2KHQ6,U5LGU2,U5LH96,U5LI90,U5LII8,U5LKC6,U5LKM6	APOL1	43975.3	6	8	14	LNILNNNYK	K	I	0.995	39	27.9	15.4	39	0	3	0	0	2	1105.6	5950.94	16313000	382	390
Mudpit_Aged L3 4 Anterior NP IAF	Apolipoprotein L, 1, isoform CRA_b OS=Homo sapiens GN=APOL1 PE=4 SV=1	A0A024R1G8,A0A024R1Q4,A0A1P8SD62_HUMAN,A5PL32,B4DNT5,B4E1N5,O14791,Q1WWL5,Q29RW7,Q2KHQ6,U5LGU2,U5LH96,U5LI90,U5LII8,U5LKC6,U5LKM6	APOL1	43975.3	6	8	14	VNEPSILEMSR	R	G	0.99	41.2	32	15.6	41.2	0	3	0	0	2	1274.64	6006.21	56601400	321	331
Mudpit_Aged L3 4 Anterior NP IAF	Apolipoprotein L, 1, isoform CRA_b OS=Homo sapiens GN=APOL1 PE=4 SV=1	A0A024R1G8,A0A024R1Q4,A0A1P8SD62_HUMAN,A5PL32,B4DNT5,B4E1N5,O14791,Q1WWL5,Q29RW7,Q2KHQ6,U5LGU2,U5LH96,U5LI90,U5LII8,U5LKC6,U5LKM6	APOL1	43975.3	6	8	14	VTEPISAESGEQVER	R	V	0.997	92.5	25.9	18.8	92.5	0	4	0	0	2	1630.79	3856.05	73013500	306	320
Mudpit_Aged L3 4 Anterior NP IAF	Apolipoprotein L, 1, isoform CRA_b OS=Homo sapiens GN=APOL1 PE=4 SV=1	A0A024R1G8,A0A024R1Q4,A0A1P8SD62_HUMAN,A5PL32,B4DNT5,B4E1N5,O14791,Q1WWL5,Q29RW7,Q2KHQ6,U5LGU2,U5LH96,U5LI90,U5LII8,U5LKC6,U5LKM6	APOL1	43975.3	6	8	14	WWTQAQAHDLVIK	K	S	0.97	31.5	28	15	31.5	0	1	0	0	2	1595.83	9022.99	12024500	234	246
Mudpit_Aged L3 4 Anterior NP IAF	Tumor necrosis factor-inducible gene 6 protein OS=Homo sapiens GN=TNFAIP6 PE=1 SV=2	P98066	TNFAIP6	31204.4	3	4	10	FLSDASVTAGGFQIK	K	Y	0.997	78.1	26.5	17.9	78.1	0	3	0	0	2	1540.8	7696.55	39615600	229	243
Mudpit_Aged L3 4 Anterior NP IAF	Tumor necrosis factor-inducible gene 6 protein OS=Homo sapiens GN=TNFAIP6 PE=1 SV=2	P98066	TNFAIP6	31204.4	3	4	10	TGIIDYGIR	K	L	0.997	46.5	27.5	15.9	46.5	0	4	0	0	2	1007.55	5790.65	68370000	108	116
Mudpit_Aged L3 4 Anterior NP IAF	Tumor necrosis factor-inducible gene 6 protein OS=Homo sapiens GN=TNFAIP6 PE=1 SV=2	P98066	TNFAIP6	31204.4	3	4	10	YVAMDPVSK	K	S	0.995	35.3	25.6	15.2	35.3	0	3	0	0	2	1009.5	3503.8	14282500	244	252
Mudpit_Aged L3 4 Anterior NP IAF	Elongation factor 1-alpha OS=Homo sapiens GN=EEF1A1 PE=2 SV=1	Q6IPT9	EEF1A1	50185.3	2	3	6	LPLQDVYK	R	I	0.99	57.1	27.6	34.7	39	0	3	0	0	2	975.551	5265.3	27667700	248	255
Mudpit_Aged L3 4 Anterior NP IAF	Elongation factor 1-alpha OS=Homo sapiens GN=EEF1A1 PE=2 SV=1	Q6IPT9	EEF1A1	50185.3	2	3	6	YYVTIIDAPGHR	K	D	0.997	70.1	28.1	17.4	70.1	0	1	2	0	2	1404.73	6304.33	57452700	85	96
Mudpit_Aged L3 4 Anterior NP IAF	Keratin, type I cytoskeletal 14 OS=Homo sapiens GN=KRT14 PE=1 SV=4	P02533	KRT14	51562.5	2	2	3	ALEEANADLEVK	R	I	0.997	66.1	26.3	17.1	66.1	0	1	0	0	2	1301.66	4311.37	5159930	135	146
Mudpit_Aged L3 4 Anterior NP IAF	Keratin, type I cytoskeletal 14 OS=Homo sapiens GN=KRT14 PE=1 SV=4	P02533	KRT14	51562.5	2	2	3	APSTYGGGLSVSSSR	R	F	0.997	64.6	26.2	17	64.6	0	2	0	0	2	1425.7	3783.42	4230090	42	56
Mudpit_Aged L3 4 Anterior NP IAF	Keratin, type I cytoskeletal 14 OS=Homo sapiens GN=KRT14 PE=1 SV=4	P02533	KRT14	51562.5	2	2	3	LASYLDKVR	R	A	0.981	38.8	25	38.9	15.4	0	0	1	0	2	1064.61	4975.66	9586030	126	134
Mudpit_Aged L3 4 Anterior NP IAF	CD109 antigen OS=Homo sapiens GN=CD109 PE=1 SV=2	Q6YHK3	CD109	161692	11	12	15	ADGNQLTLEER	R	R	0.997	118	25.9	32.2	106	0	3	0	0	2	1245.61	3900.8	11163200	375	385
Mudpit_Aged L3 4 Anterior NP IAF	CD109 antigen OS=Homo sapiens GN=CD109 PE=1 SV=2	Q6YHK3	CD109	161692	11	12	15	AEQEGGMQFWVSSESK	R	L	0.997	96.2	25	19	96.2	0	2	0	0	2	1799.79	5943.62	8177780	1115	1130
Mudpit_Aged L3 4 Anterior NP IAF	CD109 antigen OS=Homo sapiens GN=CD109 PE=1 SV=2	Q6YHK3	CD109	161692	11	12	15	ALSEFAALMNTER	K	T	0.997	55.5	26	16.5	55.5	0	1	0	0	2	1452.72	8904.72	10425600	1190	1202
Mudpit_Aged L3 4 Anterior NP IAF	CD109 antigen OS=Homo sapiens GN=CD109 PE=1 SV=2	Q6YHK3	CD109	161692	11	12	15	DYIDGVYDNAEYAER	K	F	0.997	80.9	25	18.1	80.9	0	1	0	0	2	1792.77	6020.79	2570730	649	663
Mudpit_Aged L3 4 Anterior NP IAF	CD109 antigen OS=Homo sapiens GN=CD109 PE=1 SV=2	Q6YHK3	CD109	161692	11	12	15	ELSYMVVSR	K	G	0.996	34.9	25	15.2	34.9	0	1	0	0	2	1099.55	4259.3	8537100	495	503
Mudpit_Aged L3 4 Anterior NP IAF	CD109 antigen OS=Homo sapiens GN=CD109 PE=1 SV=2	Q6YHK3	CD109	161692	11	12	15	IEFPILEDSSELQLK	K	A	0.997	74.1	28.2	17.6	74.1	0	1	0	0	2	1760.93	9159.1	21438200	430	444
Mudpit_Aged L3 4 Anterior NP IAF	CD109 antigen OS=Homo sapiens GN=CD109 PE=1 SV=2	Q6YHK3	CD109	161692	11	12	15	ISVTQPDSIVGIVAVDK	R	S	0.997	87.9	25	18.5	87.9	0	2	0	0	2	1740.97	8444.64	23051200	578	594
Mudpit_Aged L3 4 Anterior NP IAF	CD109 antigen OS=Homo sapiens GN=CD109 PE=1 SV=2	Q6YHK3	CD109	161692	11	12	15	LSDSWQPR	K	S	0.99	54.7	25	21.4	49.7	0	1	0	0	2	988.485	3873.65	4205180	1131	1138
Mudpit_Aged L3 4 Anterior NP IAF	CD109 antigen OS=Homo sapiens GN=CD109 PE=1 SV=2	Q6YHK3	CD109	161692	11	12	15	SYSQSILLDLTDNR	K	L	0.997	52	26.4	16.2	52	0	1	0	0	2	1624.82	8428.67	5311790	859	872
Mudpit_Aged L3 4 Anterior NP IAF	CD109 antigen OS=Homo sapiens GN=CD109 PE=1 SV=2	Q6YHK3	CD109	161692	11	12	15	TNIQVTVTGPSSPSPVK	R	F	0.997	106	25.4	19.6	106	0	1	0	0	2	1711.92	5715.62	2692390	1203	1219
Mudpit_Aged L3 4 Anterior NP IAF	CD109 antigen OS=Homo sapiens GN=CD109 PE=1 SV=2	Q6YHK3	CD109	161692	11	12	15	VGSPFELVVSGNK	K	R	0.997	50.5	29.7	16.2	50.5	0	1	0	0	2	1332.72	7955.37	11287500	479	491
Mudpit_Aged L3 4 Anterior NP IAF	Metalloproteinase inhibitor 3 OS=Homo sapiens GN=TIMP3 PE=1 SV=2	P35625	TIMP3	24145.5	5	6	16	EGPFGTLVYTIK	K	Q	0.997	57.9	25.7	16.6	57.9	0	5	0	0	2	1324.71	8870.06	63872000	54	65
Mudpit_Aged L3 4 Anterior NP IAF	Metalloproteinase inhibitor 3 OS=Homo sapiens GN=TIMP3 PE=1 SV=2	P35625	TIMP3	24145.5	5	6	16	MYTGLCNFVER	K	W	0.997	56.5	25	16.5	56.5	0	6	0	0	2	1390.61	6646.3	78266200	113	123
Mudpit_Aged L3 4 Anterior NP IAF	Metalloproteinase inhibitor 3 OS=Homo sapiens GN=TIMP3 PE=1 SV=2	P35625	TIMP3	24145.5	5	6	16	NECLWTDMLSNFGYPGYQSK	K	H	0.997	72.9	25	17.6	72.9	0	1	0	0	2	2411.03	9389.61	15526600	161	180
Mudpit_Aged L3 4 Anterior NP IAF	Metalloproteinase inhibitor 3 OS=Homo sapiens GN=TIMP3 PE=1 SV=2	P35625	TIMP3	24145.5	5	6	16	WDQLTLSQR	R	K	0.997	51	34.2	16.2	51	0	3	0	0	2	1146.59	5934.62	51550700	124	132
Mudpit_Aged L3 4 Anterior NP IAF	Metalloproteinase inhibitor 3 OS=Homo sapiens GN=TIMP3 PE=1 SV=2	P35625	TIMP3	24145.5	5	6	16	YQYLLTGR	K	V	0.99	35.7	25	15.2	35.7	0	1	0	0	2	1013.54	5117.21	168240000	100	107
Mudpit_Aged L3 4 Anterior NP IAF	Collagen alpha-2(V) chain OS=Homo sapiens GN=COL5A2 PE=1 SV=3	P05997	COL5A2	144910	3	3	4	GPPGPVGPSGK	R	E	0.997	38.8	27.5	22.7	31.5	0	1	0	0	2	949.51	2064.47	253224	1176	1186
Mudpit_Aged L3 4 Anterior NP IAF	Collagen alpha-2(V) chain OS=Homo sapiens GN=COL5A2 PE=1 SV=3	P05997	COL5A2	144910	3	3	4	NSVGYMDDQAK	K	N	0.997	38	25	15.4	38	0	1	0	0	2	1227.53	2639.81	2166310	1407	1417
Mudpit_Aged L3 4 Anterior NP IAF	Collagen alpha-2(V) chain OS=Homo sapiens GN=COL5A2 PE=1 SV=3	P05997	COL5A2	144910	3	3	4	QSGEYWIDPNQGSVEDAIK	K	V	0.997	77	31	17.8	77	0	2	0	0	2	2135.99	7708.64	7139130	1307	1325
Mudpit_Aged L3 4 Anterior NP IAF	Collagen alpha-2(V) chain OS=Homo sapiens GN=COL5A2 PE=1 SV=3	P05997	COL5A2	144910	3	3	4	SLSSQIETMR	K	S	0.997	37.9	25	15.4	37.9	0	1	0	0	2	1167.57	3079.98	3969660	1274	1283
Mudpit_Aged L3 4 Anterior NP IAF	Glucosylceramidase OS=Homo sapiens GN=GBA PE=2 SV=1	A0A068F658,A0A0G2JLB3,A0A0G2JNZ5,A0A223PQI4_HUMAN,B2R6A7,B7Z6E6,B7Z6S9,B7Z7G9,D3DV87,P04062	GBA	59717.7	2	2	2	SYFSEEGIGYNIIR	K	V	0.997	63.7	27.4	17	63.7	0	1	0	0	2	1647.8	8210.06	6403280	146	159
Mudpit_Aged L3 4 Anterior NP IAF	Glucosylceramidase OS=Homo sapiens GN=GBA PE=2 SV=1	A0A068F658,A0A0G2JLB3,A0A0G2JNZ5,A0A223PQI4_HUMAN,B2R6A7,B7Z6E6,B7Z6S9,B7Z7G9,D3DV87,P04062	GBA	59717.7	2	2	2	VVLTDPEAAK	K	Y	0.993	32.2	25.2	15.2	32	0	1	0	0	2	1042.58	3408.96	5446320	333	342
Mudpit_Aged L3 4 Anterior NP IAF	Renin receptor (Fragment) OS=Homo sapiens GN=ATP6AP2 PE=1 SV=1	A0A1B0GTB0_HUMAN		0	2	2	2	ILVDALQK	?	?	0.99	40	25.8	16.6	38.9	0	1	0	0	2	899.556	4764.72	9317720	0	0
Mudpit_Aged L3 4 Anterior NP IAF	Renin receptor (Fragment) OS=Homo sapiens GN=ATP6AP2 PE=1 SV=1	A0A1B0GTB0_HUMAN		0	2	2	2	YGEDSEQFR	?	?	0.997	38	25	15.4	38	0	1	0	0	2	1130.47	2741.64	5445710	0	0
Mudpit_Aged L3 4 Anterior NP IAF	Catalase OS=Homo sapiens GN=CAT PE=1 SV=3	P04040	CAT	59756.5	4	4	4	FNTANDDNVTQVR	R	A	0.997	69.2	25	17.3	69.2	0	1	0	0	2	1493.7	3387.6	5812420	432	444
Mudpit_Aged L3 4 Anterior NP IAF	Catalase OS=Homo sapiens GN=CAT PE=1 SV=3	P04040	CAT	59756.5	4	4	4	FSTVAGESGSADTVR	R	D	0.997	44.5	25.5	15.8	44.5	0	1	0	0	2	1483.7	3383.29	8580520	113	127
Mudpit_Aged L3 4 Anterior NP IAF	Catalase OS=Homo sapiens GN=CAT PE=1 SV=3	P04040	CAT	59756.5	4	4	4	LSQEDPDYGIR	R	D	0.997	37.6	25.9	15.4	37.6	0	1	0	0	2	1292.61	3899.52	9072900	253	263
Mudpit_Aged L3 4 Anterior NP IAF	Catalase OS=Homo sapiens GN=CAT PE=1 SV=3	P04040	CAT	59756.5	4	4	4	NLSVEDAAR	K	L	0.972	29	27.2	14.8	29	0	1	0	0	2	974.49	2950.22	7790100	244	252
Mudpit_Aged L3 4 Anterior NP IAF	Fatty acid-binding protein, heart OS=Homo sapiens GN=FABP3 PE=1 SV=4	P05413,Q6IBD7,S4R371	FABP3	14858.5	2	2	3	LGVEFDETTADDR	K	K	0.997	104	25	19.5	104	0	1	0	0	2	1467.66	5724.27	1971120	67	79
Mudpit_Aged L3 4 Anterior NP IAF	Fatty acid-binding protein, heart OS=Homo sapiens GN=FABP3 PE=1 SV=4	P05413,Q6IBD7,S4R371	FABP3	14858.5	2	2	3	WDGQETTLVR	K	E	0.997	56.8	26.5	16.6	56.8	0	2	0	0	2	1204.6	4553.39	12574700	98	107
Mudpit_Aged L3 4 Anterior NP IAF	Full-length cDNA clone CS0DI085YI08 of Placenta of Homo sapiens (human) (Fragment) OS=Homo sapiens PE=2 SV=1	Q86TV4		60022.4	2	2	2	DQPFTILYR	R	D	0.977	28.5	26.8	14.8	28.5	0	1	0	0	2	1152.6	8196.14	14889400	440	448
Mudpit_Aged L3 4 Anterior NP IAF	Full-length cDNA clone CS0DI085YI08 of Placenta of Homo sapiens (human) (Fragment) OS=Homo sapiens PE=2 SV=1	Q86TV4		60022.4	2	2	2	SVPADIFQMQATTR	R	Y	0.997	51.8	26.2	16.2	51.8	0	1	0	0	2	1580.77	6214.3	3007730	457	470
Mudpit_Aged L3 4 Anterior NP IAF	Uncharacterized protein OS=Homo sapiens PE=1 SV=1	B4E1Z4		140944	22	30	81	ALFVSEEEK	K	K	0.985	28.8	25.6	14.8	28.8	0	1	0	0	2	1051.53	4098.43	9873450	1132	1140
Mudpit_Aged L3 4 Anterior NP IAF	Uncharacterized protein OS=Homo sapiens PE=1 SV=1	B4E1Z4		140944	22	30	81	ALFVSEEEKK	K	L	0.997	61.9	26.7	42.9	35.9	0	3	4	0	2	1179.63	4717.51	154455000	1132	1141
Mudpit_Aged L3 4 Anterior NP IAF	Uncharacterized protein OS=Homo sapiens PE=1 SV=1	B4E1Z4		140944	22	30	81	AVISPGFDVFAK	K	K	0.997	46	25.9	19.3	42.6	0	3	0	0	2	1250.68	8768.16	27757100	385	396
Mudpit_Aged L3 4 Anterior NP IAF	Uncharacterized protein OS=Homo sapiens PE=1 SV=1	B4E1Z4		140944	22	30	81	CLVNLIEK	K	V	0.99	40.8	27.1	24.6	31.8	0	2	0	0	2	989.534	7301.22	5278440	794	801
Mudpit_Aged L3 4 Anterior NP IAF	Uncharacterized protein OS=Homo sapiens PE=1 SV=1	B4E1Z4		140944	22	30	81	DAQYAPGYDK	R	V	0.997	44.1	25	15.8	44.1	0	6	0	0	2	1127.5	2553.44	33499700	1161	1170
Mudpit_Aged L3 4 Anterior NP IAF	Uncharacterized protein OS=Homo sapiens PE=1 SV=1	B4E1Z4		140944	22	30	81	DISEVVTPR	K	F	0.994	37.6	27.9	16.1	36.9	0	5	0	0	2	1015.54	4461.72	205382000	1173	1181
Mudpit_Aged L3 4 Anterior NP IAF	Uncharacterized protein OS=Homo sapiens PE=1 SV=1	B4E1Z4		140944	22	30	81	EAGIPEFYDYDVALIK	K	L	0.997	71.8	26.1	17.5	71.8	0	5	1	0	2	1842.92	9177.39	434135000	1068	1083
Mudpit_Aged L3 4 Anterior NP IAF	Uncharacterized protein OS=Homo sapiens PE=1 SV=1	B4E1Z4		140944	22	30	81	EELLPAQDIK	K	A	0.997	53.3	25	16.3	53.3	0	4	0	0	2	1155.63	5724.37	237334000	1122	1131
Mudpit_Aged L3 4 Anterior NP IAF	Uncharacterized protein OS=Homo sapiens PE=1 SV=1	B4E1Z4		140944	22	30	81	GDSGGPLIVHK	R	R	0.997	86.5	26.4	18.4	86.5	0	1	2	0	2	1079.58	4156.02	16537100	1199	1209
Mudpit_Aged L3 4 Anterior NP IAF	Uncharacterized protein OS=Homo sapiens PE=1 SV=1	B4E1Z4		140944	22	30	81	HAFILQDTK	R	A	0.997	57.5	31.2	16.6	57.5	0	2	0	0	2	1072.58	6091.02	27041200	282	290
Mudpit_Aged L3 4 Anterior NP IAF	Uncharacterized protein OS=Homo sapiens PE=1 SV=1	B4E1Z4		140944	22	30	81	HAIILLTDGK	R	S	0.997	72.5	25	17.5	72.5	0	3	0	0	2	1080.64	6038.24	63461600	216	225
Mudpit_Aged L3 4 Anterior NP IAF	Uncharacterized protein OS=Homo sapiens PE=1 SV=1	B4E1Z4		140944	22	30	81	HVIILMTDGLHNMGGDPITVIDEIR	R	D	0.972	37.6	26.4	15.3	6.72	0	0	0	1	2	2775.42	9765.19	2743570	884	908
Mudpit_Aged L3 4 Anterior NP IAF	Uncharacterized protein OS=Homo sapiens PE=1 SV=1	B4E1Z4		140944	22	30	81	KEAGIPEFYDYDVALIK	K	L	0.997	83.8	26.7	18.2	83.8	0	2	2	0	2	1971.01	9258.02	162370000	1067	1083
Mudpit_Aged L3 4 Anterior NP IAF	Uncharacterized protein OS=Homo sapiens PE=1 SV=1	B4E1Z4		140944	22	30	81	LLGMETMAWQEIR	R	H	0.997	72.1	27.4	17.5	43.8	0	4	0	0	2	1593.78	8608.18	50004000	203	215
Mudpit_Aged L3 4 Anterior NP IAF	Uncharacterized protein OS=Homo sapiens PE=1 SV=1	B4E1Z4		140944	22	30	81	NDYLDIYAIGVGK	R	L	0.997	53.5	26.9	16.3	53.5	0	1	0	0	2	1440.74	8487.58	9121240	250	262
Mudpit_Aged L3 4 Anterior NP IAF	Uncharacterized protein OS=Homo sapiens PE=1 SV=1	B4E1Z4		140944	22	30	81	NQGILEFYGDDIALLK	K	L	0.997	47.1	27	15.9	47.1	0	1	0	0	2	1808.94	9227.2	14962200	398	413
Mudpit_Aged L3 4 Anterior NP IAF	Uncharacterized protein OS=Homo sapiens PE=1 SV=1	B4E1Z4		140944	22	30	81	QLNEINYEDHK	K	L	0.997	71.6	25	17.5	71.6	0	4	3	0	2	1402.66	3985.39	104120000	840	850
Mudpit_Aged L3 4 Anterior NP IAF	Uncharacterized protein OS=Homo sapiens PE=1 SV=1	B4E1Z4		140944	22	30	81	QPYSYDFPEDVAPALGTSFSHMLGATNPTQK	R	T	0.983	44.8	25	15.8	44.8	0	0	1	0	2	3369.57	9467.15	4687400	144	174
Mudpit_Aged L3 4 Anterior NP IAF	Uncharacterized protein OS=Homo sapiens PE=1 SV=1	B4E1Z4		140944	22	30	81	SSGQWQTPGATR	K	S	0.995	32.9	25	15.1	32.9	0	1	0	0	2	1275.61	2829.51	2501910	66	77
Mudpit_Aged L3 4 Anterior NP IAF	Uncharacterized protein OS=Homo sapiens PE=1 SV=1	B4E1Z4		140944	22	30	81	STGSWSTLK	R	T	0.997	51.3	32	16.2	51.3	0	2	0	0	2	966.489	4300.32	39984500	580	588
Mudpit_Aged L3 4 Anterior NP IAF	Uncharacterized protein OS=Homo sapiens PE=1 SV=1	B4E1Z4		140944	22	30	81	VSEADSSNADWVTK	K	Q	0.997	113	25	20.1	113	0	9	1	0	2	1508.69	3975.15	89223900	826	839
Mudpit_Aged L3 4 Anterior NP IAF	Uncharacterized protein OS=Homo sapiens PE=1 SV=1	B4E1Z4		140944	22	30	81	YGLVTYATYPK	R	I	0.997	67.3	27.3	17.2	67.3	0	7	0	0	2	1275.66	6673.1	257346000	811	821
Mudpit_Aged L3 4 Anterior NP IAF	Vitronectin OS=Homo sapiens GN=VTN PE=4 SV=1	D9ZGG2,P04004	VTN	54306.1	10	16	119	CTEGFNVDK	R	K	0.997	46.8	25	15.9	46.8	0	4	0	0	2	1070.45	3207.12	18381200	28	36
Mudpit_Aged L3 4 Anterior NP IAF	Vitronectin OS=Homo sapiens GN=VTN PE=4 SV=1	D9ZGG2,P04004	VTN	54306.1	10	16	119	CTEGFNVDKK	R	C	0.975	35.4	25	15.2	35.4	0	0	1	0	2	1198.54	3745.3	1848380	28	37
Mudpit_Aged L3 4 Anterior NP IAF	Vitronectin OS=Homo sapiens GN=VTN PE=4 SV=1	D9ZGG2,P04004	VTN	54306.1	10	16	119	DVWGIEGPIDAAFTR	R	I	0.997	84.4	26.2	18.3	84.4	0	20	1	0	2	1646.82	9929.04	371923000	198	212
Mudpit_Aged L3 4 Anterior NP IAF	Vitronectin OS=Homo sapiens GN=VTN PE=4 SV=1	D9ZGG2,P04004	VTN	54306.1	10	16	119	DWHGVPGQVDAAMAGR	R	I	0.997	65.6	26.4	17.1	65.6	0	17	31	0	2	1682.77	6214.17	2681110000	338	353
Mudpit_Aged L3 4 Anterior NP IAF	Vitronectin OS=Homo sapiens GN=VTN PE=4 SV=1	D9ZGG2,P04004	VTN	54306.1	10	16	119	FEDGVLDPDYPR	R	N	0.997	79.4	25	18	79.4	0	27	2	0	2	1422.65	6541.79	2989290000	230	241
Mudpit_Aged L3 4 Anterior NP IAF	Vitronectin OS=Homo sapiens GN=VTN PE=4 SV=1	D9ZGG2,P04004	VTN	54306.1	10	16	119	GQYCYELDEK	R	A	0.996	39	25	15.4	39	0	1	0	0	2	1305.53	4559.41	5729040	177	186
Mudpit_Aged L3 4 Anterior NP IAF	Vitronectin OS=Homo sapiens GN=VTN PE=4 SV=1	D9ZGG2,P04004	VTN	54306.1	10	16	119	MDWLVPATCEPIQSVFFFSGDK	R	Y	0.979	43.2	25.4	15.7	43.2	0	1	0	0	2	2575.19	9469.12	2629060	422	443
Mudpit_Aged L3 4 Anterior NP IAF	Vitronectin OS=Homo sapiens GN=VTN PE=4 SV=1	D9ZGG2,P04004	VTN	54306.1	10	16	119	NISDGFDGIPDNVDAALALPAHSYSGR	R	E	0.995	56.5	25.8	16.5	56.5	0	0	2	0	2	2772.32	9121.65	23053300	242	268
Mudpit_Aged L3 4 Anterior NP IAF	Vitronectin OS=Homo sapiens GN=VTN PE=4 SV=1	D9ZGG2,P04004	VTN	54306.1	10	16	119	RVDTVDPPYPR	R	S	0.997	62.4	25.8	17.7	61.6	0	3	4	0	2	1314.68	4481.94	1407620000	453	463
Mudpit_Aged L3 4 Anterior NP IAF	Vitronectin OS=Homo sapiens GN=VTN PE=4 SV=1	D9ZGG2,P04004	VTN	54306.1	10	16	119	VDTVDPPYPR	R	S	0.997	58.7	25	16.7	58.7	0	5	0	0	2	1158.58	4132.1	475982000	454	463
Mudpit_Aged L3 4 Anterior NP IAF	cDNA FLJ51597, highly similar to C4b-binding protein alpha chain OS=Homo sapiens PE=2 SV=1	B4E1D8,B4E1E1,P04003	C4BPA	67033	4	4	10	EDVYVVGTVLR	K	Y	0.997	51.6	25	16.2	51.6	0	4	0	0	2	1249.68	6867.12	70959600	319	329
Mudpit_Aged L3 4 Anterior NP IAF	cDNA FLJ51597, highly similar to C4b-binding protein alpha chain OS=Homo sapiens PE=2 SV=1	B4E1D8,B4E1E1,P04003	C4BPA	67033	4	4	10	GYILVGQAK	K	L	0.978	30	25.3	14.9	30	0	2	0	0	2	948.551	4545.83	43724900	457	465
Mudpit_Aged L3 4 Anterior NP IAF	cDNA FLJ51597, highly similar to C4b-binding protein alpha chain OS=Homo sapiens PE=2 SV=1	B4E1D8,B4E1E1,P04003	C4BPA	67033	4	4	10	LSLEIEQLELQR	K	D	0.997	67.7	25.3	24.6	60.3	0	1	0	0	2	1470.82	8568.72	8642490	574	585
Mudpit_Aged L3 4 Anterior NP IAF	cDNA FLJ51597, highly similar to C4b-binding protein alpha chain OS=Homo sapiens PE=2 SV=1	B4E1D8,B4E1E1,P04003	C4BPA	67033	4	4	10	QSSSYSFFK	K	E	0.997	42.2	25	15.6	42.2	0	3	0	0	2	1080.5	5837.88	26387000	439	447
Mudpit_Aged L3 4 Anterior NP IAF	Fibronectin type III domain-containing protein 1 OS=Homo sapiens GN=FNDC1 PE=2 SV=4	Q4ZHG4	FNDC1	205558	8	8	12	AQDVQQSTDADTEGHSPK	K	A	0.988	43.2	25	15.7	43.2	0	0	2	0	2	1913.85	2189.03	6957530	949	966
Mudpit_Aged L3 4 Anterior NP IAF	Fibronectin type III domain-containing protein 1 OS=Homo sapiens GN=FNDC1 PE=2 SV=4	Q4ZHG4	FNDC1	205558	8	8	12	EEREPAIALAPR	K	G	0.946	34.4	25.8	15.1	34.4	0	0	1	0	2	1351.73	6161.5	12458500	1222	1233
Mudpit_Aged L3 4 Anterior NP IAF	Fibronectin type III domain-containing protein 1 OS=Homo sapiens GN=FNDC1 PE=2 SV=4	Q4ZHG4	FNDC1	205558	8	8	12	FVAPYVTYLNK	R	D	0.966	30.2	27.2	14.9	30.2	0	2	0	0	2	1314.71	7590.12	18228000	1610	1620
Mudpit_Aged L3 4 Anterior NP IAF	Fibronectin type III domain-containing protein 1 OS=Homo sapiens GN=FNDC1 PE=2 SV=4	Q4ZHG4	FNDC1	205558	8	8	12	GLVLNAEGR	R	Y	0.997	42.4	25.5	15.7	42.4	0	1	0	0	2	928.521	3622.56	6176160	1363	1371
Mudpit_Aged L3 4 Anterior NP IAF	Fibronectin type III domain-containing protein 1 OS=Homo sapiens GN=FNDC1 PE=2 SV=4	Q4ZHG4	FNDC1	205558	8	8	12	ISEEDELDVPDDISVR	K	V	0.997	116	25.1	20.3	116	0	2	0	0	2	1830.86	7478.78	16872900	254	269
Mudpit_Aged L3 4 Anterior NP IAF	Fibronectin type III domain-containing protein 1 OS=Homo sapiens GN=FNDC1 PE=2 SV=4	Q4ZHG4	FNDC1	205558	8	8	12	IYLSDNLK	K	D	0.979	31.9	26	15	31.9	0	1	0	0	2	965.53	4651.07	7422080	1808	1815
Mudpit_Aged L3 4 Anterior NP IAF	Fibronectin type III domain-containing protein 1 OS=Homo sapiens GN=FNDC1 PE=2 SV=4	Q4ZHG4	FNDC1	205558	8	8	12	SLTYPGDTTSALVDGLQPGER	K	Y	0.997	116	27.6	20.3	116	0	2	0	0	2	2177.07	7706.71	10759000	410	430
Mudpit_Aged L3 4 Anterior NP IAF	Fibronectin type III domain-containing protein 1 OS=Homo sapiens GN=FNDC1 PE=2 SV=4	Q4ZHG4	FNDC1	205558	8	8	12	TGPQSYVEALPTIQGYYR	R	Q	0.997	90.9	27.6	18.7	90.9	0	1	0	0	2	2043.02	9011.95	9110190	1843	1860
Mudpit_Aged L3 4 Anterior NP IAF	Phosphoglucomutase-1 OS=Homo sapiens GN=PGM1 PE=1 SV=3	P36871	PGM1	61451.1	8	8	9	ADNFEYSDPVDGSISR	K	N	0.997	73.1	25	17.6	73.1	0	2	0	0	2	1771.78	5962.11	5327230	471	486
Mudpit_Aged L3 4 Anterior NP IAF	Phosphoglucomutase-1 OS=Homo sapiens GN=PGM1 PE=1 SV=3	P36871	PGM1	61451.1	8	8	9	DLEALMFDR	K	S	0.993	36.8	25.4	17	35.1	0	1	0	0	2	1109.53	8802.3	4555420	444	452
Mudpit_Aged L3 4 Anterior NP IAF	Phosphoglucomutase-1 OS=Homo sapiens GN=PGM1 PE=1 SV=3	P36871	PGM1	61451.1	8	8	9	EAIQLIAR	K	I	0.99	36.7	26.3	22.3	29.7	0	1	0	0	2	913.547	4856.09	24166600	69	76
Mudpit_Aged L3 4 Anterior NP IAF	Phosphoglucomutase-1 OS=Homo sapiens GN=PGM1 PE=1 SV=3	P36871	PGM1	61451.1	8	8	9	LIFTDGSR	R	I	0.99	46.3	26.8	31.9	30.3	0	1	0	0	2	908.484	4728.32	5980170	492	499
Mudpit_Aged L3 4 Anterior NP IAF	Phosphoglucomutase-1 OS=Homo sapiens GN=PGM1 PE=1 SV=3	P36871	PGM1	61451.1	8	8	9	LSGTGSAGATIR	R	L	0.997	47.2	27.7	16	47.2	0	1	0	0	2	1090.59	2408.27	2644230	504	515
Mudpit_Aged L3 4 Anterior NP IAF	Phosphoglucomutase-1 OS=Homo sapiens GN=PGM1 PE=1 SV=3	P36871	PGM1	61451.1	8	8	9	QEATLVVGGDGR	R	F	0.991	35.7	26.6	15.2	35.7	0	1	0	0	2	1201.62	3382.52	7316790	53	64
Mudpit_Aged L3 4 Anterior NP IAF	Phosphoglucomutase-1 OS=Homo sapiens GN=PGM1 PE=1 SV=3	P36871	PGM1	61451.1	8	8	9	SMPTSGALDR	R	V	0.981	27.7	25	17.2	25.2	0	1	0	0	2	1034.49	2840.04	4699980	334	343
Mudpit_Aged L3 4 Anterior NP IAF	Phosphoglucomutase-1 OS=Homo sapiens GN=PGM1 PE=1 SV=3	P36871	PGM1	61451.1	8	8	9	YDYEEVEAEGANK	R	M	0.997	42.7	25	15.7	42.7	0	1	0	0	2	1516.64	4521.5	4055000	428	440
Mudpit_Aged L3 4 Anterior NP IAF	Vasorin OS=Homo sapiens GN=VASN PE=1 SV=1	Q6EMK4	VASN	71714.1	2	2	2	ESHVTLASPEETR	R	C	0.968	34.1	25.5	15.1	34.1	0	0	1	0	2	1455.71	4018.18	2887430	315	327
Mudpit_Aged L3 4 Anterior NP IAF	Vasorin OS=Homo sapiens GN=VASN PE=1 SV=1	Q6EMK4	VASN	71714.1	2	2	2	SLTLGIEPVSPTSLR	R	V	0.993	35.2	25	15.2	35.2	0	1	0	0	2	1569.88	8645.04	2690870	463	477
Mudpit_Aged L3 4 Anterior NP IAF	Profilin-1 OS=Homo sapiens GN=PFN1 PE=1 SV=2	P07737	PFN1	15054.3	2	2	3	DSLLQDGEFSMDLR	R	T	0.997	77.3	35.9	17.8	77.3	0	1	0	0	2	1625.75	8996.7	9493200	76	89
Mudpit_Aged L3 4 Anterior NP IAF	Profilin-1 OS=Homo sapiens GN=PFN1 PE=1 SV=2	P07737	PFN1	15054.3	2	2	3	DSPSVWAAVPGK	K	T	0.997	43.8	25	15.7	43.8	0	2	0	0	2	1213.62	6128.28	14621900	27	38
Mudpit_Aged L3 4 Anterior NP IAF	Serine protease HTRA3 OS=Homo sapiens GN=HTRA3 PE=1 SV=2	P83110	HTRA3	48608.5	7	8	20	ALQLSGTPVR	R	Q	0.977	29.7	25.1	20.5	24.1	0	1	0	0	2	1041.61	4293.94	10373200	110	119
Mudpit_Aged L3 4 Anterior NP IAF	Serine protease HTRA3 OS=Homo sapiens GN=HTRA3 PE=1 SV=2	P83110	HTRA3	48608.5	7	8	20	ASNPDFPEVSSGIYVQEVAPNSPSQR	K	G	0.997	104	28.8	19.5	104	0	1	3	0	2	2775.32	7591.24	26394000	374	399
Mudpit_Aged L3 4 Anterior NP IAF	Serine protease HTRA3 OS=Homo sapiens GN=HTRA3 PE=1 SV=2	P83110	HTRA3	48608.5	7	8	20	FLTEFQDK	R	Q	0.99	42.3	25	18.5	39.4	0	3	0	0	2	1027.51	4915.65	77080000	340	347
Mudpit_Aged L3 4 Anterior NP IAF	Serine protease HTRA3 OS=Homo sapiens GN=HTRA3 PE=1 SV=2	P83110	HTRA3	48608.5	7	8	20	FNFIADVVEK	K	I	0.997	52.1	26.5	16.3	52.1	0	3	0	0	2	1181.62	8787.44	76397800	140	149
Mudpit_Aged L3 4 Anterior NP IAF	Serine protease HTRA3 OS=Homo sapiens GN=HTRA3 PE=1 SV=2	P83110	HTRA3	48608.5	7	8	20	RGNDDLLFSIAPEVVM	R	-	0.997	81.1	27.3	18.1	81.1	0	1	0	0	2	1791.89	9290.43	8054710	438	453
Mudpit_Aged L3 4 Anterior NP IAF	Serine protease HTRA3 OS=Homo sapiens GN=HTRA3 PE=1 SV=2	P83110	HTRA3	48608.5	7	8	20	TITPSLVDELK	R	A	0.997	74.9	26.1	17.7	74.9	0	5	0	0	2	1215.68	6728.49	69417700	363	373
Mudpit_Aged L3 4 Anterior NP IAF	Serine protease HTRA3 OS=Homo sapiens GN=HTRA3 PE=1 SV=2	P83110	HTRA3	48608.5	7	8	20	VTAGISFAIPSDR	K	I	0.997	115	27	20.2	115	0	3	0	0	2	1333.71	7641.87	23618400	324	336
Mudpit_Aged L3 4 Anterior NP IAF	Inter-alpha-trypsin inhibitor heavy chain H3 OS=Homo sapiens GN=ITIH3 PE=1 SV=2	Q06033	ITIH3	99850.9	9	15	33	DYIFGNYIER	R	L	0.997	58	25.2	16.6	58	0	1	0	0	2	1289.62	7704.41	14599000	547	556
Mudpit_Aged L3 4 Anterior NP IAF	Inter-alpha-trypsin inhibitor heavy chain H3 OS=Homo sapiens GN=ITIH3 PE=1 SV=2	Q06033	ITIH3	99850.9	9	15	33	EHLVQATPENLQEAR	K	T	0.997	70.9	27	17.4	70.9	0	5	3	0	2	1734.88	5738.52	193372000	334	348
Mudpit_Aged L3 4 Anterior NP IAF	Inter-alpha-trypsin inhibitor heavy chain H3 OS=Homo sapiens GN=ITIH3 PE=1 SV=2	Q06033	ITIH3	99850.9	9	15	33	EVSFDVELPK	K	T	0.997	56.2	27.2	16.5	56.2	0	2	0	0	2	1162.6	7412.32	25819900	76	85
Mudpit_Aged L3 4 Anterior NP IAF	Inter-alpha-trypsin inhibitor heavy chain H3 OS=Homo sapiens GN=ITIH3 PE=1 SV=2	Q06033	ITIH3	99850.9	9	15	33	FAHNVVTMR	R	A	0.985	47.7	28.1	16	47.7	0	0	1	0	2	1074.55	5614.88	5244120	58	66
Mudpit_Aged L3 4 Anterior NP IAF	Inter-alpha-trypsin inhibitor heavy chain H3 OS=Homo sapiens GN=ITIH3 PE=1 SV=2	Q06033	ITIH3	99850.9	9	15	33	GHGATNDLTFTEEVDMK	K	E	0.997	97.4	25	19.1	97.4	0	1	5	0	2	1864.84	8494.48	33341700	521	537
Mudpit_Aged L3 4 Anterior NP IAF	Inter-alpha-trypsin inhibitor heavy chain H3 OS=Homo sapiens GN=ITIH3 PE=1 SV=2	Q06033	ITIH3	99850.9	9	15	33	GMTNINDGLLR	K	G	0.997	59.1	26.6	16.7	59.1	0	5	0	0	2	1203.62	4548.99	54151400	358	368
Mudpit_Aged L3 4 Anterior NP IAF	Inter-alpha-trypsin inhibitor heavy chain H3 OS=Homo sapiens GN=ITIH3 PE=1 SV=2	Q06033	ITIH3	99850.9	9	15	33	LVDEDMNSFK	R	A	0.997	67.2	25	17.2	67.2	0	4	0	0	2	1213.54	4587.08	27955300	507	516
Mudpit_Aged L3 4 Anterior NP IAF	Inter-alpha-trypsin inhibitor heavy chain H3 OS=Homo sapiens GN=ITIH3 PE=1 SV=2	Q06033	ITIH3	99850.9	9	15	33	STSIVIMLTDGDANVGESRPEK	R	I	0.997	86.6	27	18.4	86.6	0	3	2	0	2	2319.15	8403.93	34058400	386	407
Mudpit_Aged L3 4 Anterior NP IAF	Inter-alpha-trypsin inhibitor heavy chain H3 OS=Homo sapiens GN=ITIH3 PE=1 SV=2	Q06033	ITIH3	99850.9	9	15	33	VTFELTYEELLK	K	R	0.997	58.7	26.3	16.7	58.7	0	1	0	0	2	1484.79	9143.13	18691900	150	161
Mudpit_Aged L3 4 Anterior NP IAF	Prolow-density lipoprotein receptor-related protein 1 OS=Homo sapiens GN=LRP1 PE=1 SV=2	Q07954	LRP1	504592	9	9	11	AVTDEEPFLIFANR	K	Y	0.997	58.3	26.6	16.6	58.3	0	2	0	0	2	1621.82	9233.76	8301990	3023	3036
Mudpit_Aged L3 4 Anterior NP IAF	Prolow-density lipoprotein receptor-related protein 1 OS=Homo sapiens GN=LRP1 PE=1 SV=2	Q07954	LRP1	504592	9	9	11	EYAGYLLYSER	R	T	0.997	47.7	26.2	16	47.7	0	1	0	0	2	1363.65	6728.72	5009240	2196	2206
Mudpit_Aged L3 4 Anterior NP IAF	Prolow-density lipoprotein receptor-related protein 1 OS=Homo sapiens GN=LRP1 PE=1 SV=2	Q07954	LRP1	504592	9	9	11	GDYSVLVPGLR	K	N	0.997	44.5	27.4	15.8	44.5	0	1	0	0	2	1175.64	8081.77	4506900	1287	1297
Mudpit_Aged L3 4 Anterior NP IAF	Prolow-density lipoprotein receptor-related protein 1 OS=Homo sapiens GN=LRP1 PE=1 SV=2	Q07954	LRP1	504592	9	9	11	GPVGLAIDFPESK	K	L	0.997	51	27.8	16.2	51	0	2	0	0	2	1329.71	7914.61	7766500	1743	1755
Mudpit_Aged L3 4 Anterior NP IAF	Prolow-density lipoprotein receptor-related protein 1 OS=Homo sapiens GN=LRP1 PE=1 SV=2	Q07954	LRP1	504592	9	9	11	IDLETGENR	R	E	0.995	37.1	25.8	27.5	24.9	0	1	0	0	2	1046.51	2974.99	6066920	2079	2087
Mudpit_Aged L3 4 Anterior NP IAF	Prolow-density lipoprotein receptor-related protein 1 OS=Homo sapiens GN=LRP1 PE=1 SV=2	Q07954	LRP1	504592	9	9	11	ITIVENVGSVEGLAYHR	R	G	0.997	70.7	26.2	17.4	70.7	0	0	1	0	2	1856.99	8036.69	5774940	2276	2292
Mudpit_Aged L3 4 Anterior NP IAF	Prolow-density lipoprotein receptor-related protein 1 OS=Homo sapiens GN=LRP1 PE=1 SV=2	Q07954	LRP1	504592	9	9	11	NVIALAFDYR	K	A	0.997	64.5	27.2	17.3	64.3	0	1	0	0	2	1181.63	9035.72	5801350	2235	2244
Mudpit_Aged L3 4 Anterior NP IAF	Prolow-density lipoprotein receptor-related protein 1 OS=Homo sapiens GN=LRP1 PE=1 SV=2	Q07954	LRP1	504592	9	9	11	TNTQPFDLQVYHPSR	R	Q	0.984	40.6	25.6	15.5	40.6	0	0	1	0	2	1802.88	8632.39	3380360	1518	1532
Mudpit_Aged L3 4 Anterior NP IAF	Prolow-density lipoprotein receptor-related protein 1 OS=Homo sapiens GN=LRP1 PE=1 SV=2	Q07954	LRP1	504592	9	9	11	VFFTDYGQIPK	K	V	0.997	41.4	26.1	15.6	41.4	0	1	0	0	2	1314.67	7859.21	6840090	337	347
Mudpit_Aged L3 4 Anterior NP IAF	Serpin peptidase inhibitor, clade E (Nexin, plasminogen activator inhibitor type 1), member 2, isoform CRA_a OS=Homo sapiens GN=SERPINE2 PE=3 SV=1	A0A024R451,P07093	SERPINE2	44003.2	10	16	76	ASAATTAILIAR	K	S	0.997	72	25.3	17.5	72	0	4	0	0	2	1158.68	5883.61	76631600	354	365
Mudpit_Aged L3 4 Anterior NP IAF	Serpin peptidase inhibitor, clade E (Nexin, plasminogen activator inhibitor type 1), member 2, isoform CRA_a OS=Homo sapiens GN=SERPINE2 PE=3 SV=1	A0A024R451,P07093	SERPINE2	44003.2	10	16	76	DIVTVANAVFVK	K	N	0.997	61.8	25	16.9	61.8	0	3	0	0	2	1275.73	8754.86	49093100	106	117
Mudpit_Aged L3 4 Anterior NP IAF	Serpin peptidase inhibitor, clade E (Nexin, plasminogen activator inhibitor type 1), member 2, isoform CRA_a OS=Homo sapiens GN=SERPINE2 PE=3 SV=1	A0A024R451,P07093	SERPINE2	44003.2	10	16	76	DMIDNLLSPDLIDGVLTR	R	L	0.997	131	27.1	21.2	131	0	6	0	0	2	2000.04	9398.02	63717300	163	180
Mudpit_Aged L3 4 Anterior NP IAF	Serpin peptidase inhibitor, clade E (Nexin, plasminogen activator inhibitor type 1), member 2, isoform CRA_a OS=Homo sapiens GN=SERPINE2 PE=3 SV=1	A0A024R451,P07093	SERPINE2	44003.2	10	16	76	FTAVAQTDLK	K	E	0.997	54.5	26.9	16.4	54.5	0	7	0	0	2	1093.59	4085.57	51142300	296	305
Mudpit_Aged L3 4 Anterior NP IAF	Serpin peptidase inhibitor, clade E (Nexin, plasminogen activator inhibitor type 1), member 2, isoform CRA_a OS=Homo sapiens GN=SERPINE2 PE=3 SV=1	A0A024R451,P07093	SERPINE2	44003.2	10	16	76	FTAVAQTDLKEPLK	K	V	0.997	94.2	26.1	18.9	94.2	0	4	10	0	2	1560.86	6195.76	196726000	296	309
Mudpit_Aged L3 4 Anterior NP IAF	Serpin peptidase inhibitor, clade E (Nexin, plasminogen activator inhibitor type 1), member 2, isoform CRA_a OS=Homo sapiens GN=SERPINE2 PE=3 SV=1	A0A024R451,P07093	SERPINE2	44003.2	10	16	76	HNPTGAVLFMGQINKP	R	-	0.996	71.1	25.9	17.4	71.1	0	0	4	0	2	1723.89	8743.73	37142400	383	398
Mudpit_Aged L3 4 Anterior NP IAF	Serpin peptidase inhibitor, clade E (Nexin, plasminogen activator inhibitor type 1), member 2, isoform CRA_a OS=Homo sapiens GN=SERPINE2 PE=3 SV=1	A0A024R451,P07093	SERPINE2	44003.2	10	16	76	NVNFEDPASACDSINAWVK	R	N	0.997	78.3	25	17.9	78.3	0	3	0	0	2	2137.95	8568.14	13297600	140	158
Mudpit_Aged L3 4 Anterior NP IAF	Serpin peptidase inhibitor, clade E (Nexin, plasminogen activator inhibitor type 1), member 2, isoform CRA_a OS=Homo sapiens GN=SERPINE2 PE=3 SV=1	A0A024R451,P07093	SERPINE2	44003.2	10	16	76	SYQVPMLAQLSVFR	K	C	0.997	50.8	26.4	16.2	50.8	0	1	0	0	2	1638.87	9254.81	40782100	214	227
Mudpit_Aged L3 4 Anterior NP IAF	Serpin peptidase inhibitor, clade E (Nexin, plasminogen activator inhibitor type 1), member 2, isoform CRA_a OS=Homo sapiens GN=SERPINE2 PE=3 SV=1	A0A024R451,P07093	SERPINE2	44003.2	10	16	76	TIDSWMSIMVPK	K	R	0.997	64.1	26.6	17	64.1	0	6	0	0	2	1407.7	8717.06	128604000	276	287
Mudpit_Aged L3 4 Anterior NP IAF	Serpin peptidase inhibitor, clade E (Nexin, plasminogen activator inhibitor type 1), member 2, isoform CRA_a OS=Homo sapiens GN=SERPINE2 PE=3 SV=1	A0A024R451,P07093	SERPINE2	44003.2	10	16	76	VLGITDMFDSSK	K	A	0.997	73.7	25	17.6	73.7	0	28	0	0	2	1328.64	7919.53	219576000	310	321
Mudpit_Aged L3 4 Anterior NP IAF	cDNA FLJ53698, highly similar to Gelsolin OS=Homo sapiens PE=2 SV=1	B7Z992		78831.8	15	22	60	AGALNSNDAFVLK	K	T	0.997	96.8	27.6	19.1	96.8	0	6	0	0	2	1319.7	6176.47	161290000	518	530
Mudpit_Aged L3 4 Anterior NP IAF	cDNA FLJ53698, highly similar to Gelsolin OS=Homo sapiens PE=2 SV=1	B7Z992		78831.8	15	22	60	AQPVQVAEGSEPDGFWEALGGK	R	A	0.997	105	26.3	19.6	105	0	1	1	0	2	2272.09	8892.74	287945000	560	581
Mudpit_Aged L3 4 Anterior NP IAF	cDNA FLJ53698, highly similar to Gelsolin OS=Homo sapiens PE=2 SV=1	B7Z992		78831.8	15	22	60	DPDQTDGLGLSYLSSHIANVER	R	V	0.997	137	26	21.6	137	0	3	3	0	2	2387.15	8852.25	250286000	331	352
Mudpit_Aged L3 4 Anterior NP IAF	cDNA FLJ53698, highly similar to Gelsolin OS=Homo sapiens PE=2 SV=1	B7Z992		78831.8	15	22	60	EPGLQIWR	K	V	0.99	36.6	25.7	15.3	36.6	0	5	0	0	2	998.542	7167.75	161247000	14	21
Mudpit_Aged L3 4 Anterior NP IAF	cDNA FLJ53698, highly similar to Gelsolin OS=Homo sapiens PE=2 SV=1	B7Z992		78831.8	15	22	60	EVQGFESATFLGYFK	R	S	0.997	108	25.9	19.7	108	0	11	0	0	2	1722.84	9441.7	168342000	81	95
Mudpit_Aged L3 4 Anterior NP IAF	cDNA FLJ53698, highly similar to Gelsolin OS=Homo sapiens PE=2 SV=1	B7Z992		78831.8	15	22	60	HVVPNEVVVQR	K	L	0.994	59.2	26.7	16.7	59.2	0	0	1	0	2	1275.72	6174.46	4641980	111	121
Mudpit_Aged L3 4 Anterior NP IAF	cDNA FLJ53698, highly similar to Gelsolin OS=Homo sapiens PE=2 SV=1	B7Z992		78831.8	15	22	60	QTQVSVLPEGGETPLFK	K	Q	0.997	80.9	27.2	18.1	80.9	0	6	2	0	2	1829.96	8188.3	71409200	307	323
Mudpit_Aged L3 4 Anterior NP IAF	cDNA FLJ53698, highly similar to Gelsolin OS=Homo sapiens PE=2 SV=1	B7Z992		78831.8	15	22	60	RYIETDPANR	K	D	0.963	35.1	27.8	18.1	32.1	0	0	1	0	2	1234.62	3482.4	5435130	662	671
Mudpit_Aged L3 4 Anterior NP IAF	cDNA FLJ53698, highly similar to Gelsolin OS=Homo sapiens PE=2 SV=1	B7Z992		78831.8	15	22	60	TASDFITK	K	M	0.99	37.2	25	21.4	31.1	0	1	0	0	2	882.457	3129.26	2839230	294	301
Mudpit_Aged L3 4 Anterior NP IAF	cDNA FLJ53698, highly similar to Gelsolin OS=Homo sapiens PE=2 SV=1	B7Z992		78831.8	15	22	60	TGAQELLR	K	V	0.99	68.1	29.3	50	35.4	0	3	0	0	2	887.495	3551.71	174002000	549	556
Mudpit_Aged L3 4 Anterior NP IAF	cDNA FLJ53698, highly similar to Gelsolin OS=Homo sapiens PE=2 SV=1	B7Z992		78831.8	15	22	60	TPSAAYLWVGTGASEAEK	K	T	0.997	105	30.7	19.6	105	0	7	1	0	2	1837.9	7957.68	41752000	531	548
Mudpit_Aged L3 4 Anterior NP IAF	cDNA FLJ53698, highly similar to Gelsolin OS=Homo sapiens PE=2 SV=1	B7Z992		78831.8	15	22	60	VHVSEEGTEPEAMLQVLGPKPALPAGTEDTAK	R	E	0.996	57.2	25.8	16.6	57.2	0	0	1	1	2	3301.66	8675.23	25801200	191	222
Mudpit_Aged L3 4 Anterior NP IAF	cDNA FLJ53698, highly similar to Gelsolin OS=Homo sapiens PE=2 SV=1	B7Z992		78831.8	15	22	60	VPFDAATLHTSTAMAAQHGMDDDGTGQK	R	Q	0.985	59.6	25	16.7	59.6	0	0	2	0	2	2873.28	8832.91	11162600	353	380
Mudpit_Aged L3 4 Anterior NP IAF	cDNA FLJ53698, highly similar to Gelsolin OS=Homo sapiens PE=2 SV=1	B7Z992		78831.8	15	22	60	VPVDPATYGQFYGGDSYIILYNYR	K	H	0.997	102	25.7	19.4	102	0	1	2	0	2	2771.34	9230.38	104922000	391	414
Mudpit_Aged L3 4 Anterior NP IAF	cDNA FLJ53698, highly similar to Gelsolin OS=Homo sapiens PE=2 SV=1	B7Z992		78831.8	15	22	60	YIETDPANR	R	D	0.957	29.5	27.2	14.8	29.5	0	1	0	0	2	1078.52	2380.12	3257740	663	671
Mudpit_Aged L3 4 Anterior NP IAF	Uncharacterized protein OS=Homo sapiens PE=2 SV=1	A0A5E4		24746.2	2	2	8	AAPSVTLFPPSSEELQANK	K	A	0.997	80.8	26.6	18	80.8	0	32	21	0	2	1986.02	7749.82	2283100000	134	152
Mudpit_Aged L3 4 Anterior NP IAF	Uncharacterized protein OS=Homo sapiens PE=2 SV=1	A0A5E4		24746.2	2	2	8	AGVETTTPSK	K	Q	0.997	61.1	27.6	18.5	59.4	0	2	0	0	2	990.51	1530.29	641979	180	189
Mudpit_Aged L3 4 Anterior NP IAF	Uncharacterized protein OS=Homo sapiens PE=2 SV=1	A0A5E4		24746.2	2	2	8	FSGSILGNK	R	A	0.997	42.9	26.3	15.7	42.9	0	3	0	0	2	922.499	4492.24	21419100	83	91
Mudpit_Aged L3 4 Anterior NP IAF	Uncharacterized protein OS=Homo sapiens PE=2 SV=1	A0A5E4		24746.2	2	2	8	SYSCQVTHEGSTVEK	R	T	0.995	40.6	25	15.5	40.6	0	1	1	0	2	1712.74	4137.2	12262500	213	227
Mudpit_Aged L3 4 Anterior NP IAF	Uncharacterized protein OS=Homo sapiens PE=2 SV=1	A0A5E4		24746.2	2	2	8	VTVLGQPK	K	A	0.99	43.3	25	15.7	43.3	0	5	0	0	2	841.514	2958.94	57789300	126	133
Mudpit_Aged L3 4 Anterior NP IAF	Uncharacterized protein OS=Homo sapiens PE=2 SV=1	A0A5E4		24746.2	2	2	8	YAASSYLSLTPEQWK	K	S	0.997	110	27.2	19.9	110	0	12	2	0	2	1743.86	8854.75	109637000	195	209
Mudpit_Aged L3 4 Anterior NP IAF	C-type lysozyme OS=Homo sapiens GN=LYZ PE=2 SV=1	B2R4C5,P61626	LYZ	16536.9	2	2	7	ATNYNAGDR	R	S	0.997	45.6	25	15.9	45.6	0	1	0	0	2	981.438	1461.52	243618	60	68
Mudpit_Aged L3 4 Anterior NP IAF	C-type lysozyme OS=Homo sapiens GN=LYZ PE=2 SV=1	B2R4C5,P61626	LYZ	16536.9	2	2	7	STDYGIFQINSR	R	Y	0.997	79.7	25	18	79.7	0	6	0	0	2	1400.68	6788.72	149360000	69	80
Mudpit_Aged L3 4 Anterior NP IAF	Collagen, type XI, alpha 1, isoform CRA_c OS=Homo sapiens GN=COL11A1 PE=4 SV=1	D3DT72	COL11A1	182420	2	2	3	FLGSNDEEMSYDNNPFIK	R	T	0.997	73.8	25	17.6	73.8	0	1	0	0	2	2119.93	8198.41	3749930	1746	1763
Mudpit_Aged L3 4 Anterior NP IAF	Collagen, type XI, alpha 1, isoform CRA_c OS=Homo sapiens GN=COL11A1 PE=4 SV=1	D3DT72	COL11A1	182420	2	2	3	ILDEEVFEGDIQQFLITGDPK	R	A	0.997	108	26.1	19.7	108	0	2	0	0	2	2406.21	9397.8	15080200	210	230
Mudpit_Aged L3 4 Anterior NP IAF	ATP-dependent 6-phosphofructokinase, platelet type OS=Homo sapiens GN=PFKP PE=1 SV=2	Q01813	PFKP	85597.4	3	3	3	DLQSNVEHLTEK	R	M	0.988	45.2	25.4	15.8	45.2	0	0	1	0	2	1412.7	6287.46	2843400	614	625
Mudpit_Aged L3 4 Anterior NP IAF	ATP-dependent 6-phosphofructokinase, platelet type OS=Homo sapiens GN=PFKP PE=1 SV=2	Q01813	PFKP	85597.4	3	3	3	LPDDQIPK	K	T	0.967	29.3	25.5	14.8	29.3	0	1	0	0	2	925.499	3887.28	3309320	401	408
Mudpit_Aged L3 4 Anterior NP IAF	ATP-dependent 6-phosphofructokinase, platelet type OS=Homo sapiens GN=PFKP PE=1 SV=2	Q01813	PFKP	85597.4	3	3	3	YLEEIATQMR	K	T	0.997	44	25.9	15.7	44	0	1	0	0	2	1269.61	4243.32	7579500	487	496
Mudpit_Aged L3 4 Anterior NP IAF	2-phosphoxylose phosphatase 1 OS=Homo sapiens GN=PXYLP1 PE=1 SV=1	B7Z3R9,B7Z4T2,E9PDB7,Q8TE99	PXYLP1	55241.3	2	2	3	LIFELWQDR	R	E	0.997	48.5	27.7	24.7	39.8	0	1	0	0	2	1219.65	9139.31	26404300	403	411
Mudpit_Aged L3 4 Anterior NP IAF	2-phosphoxylose phosphatase 1 OS=Homo sapiens GN=PXYLP1 PE=1 SV=1	B7Z3R9,B7Z4T2,E9PDB7,Q8TE99	PXYLP1	55241.3	2	2	3	YPLYVIPK	R	T	0.981	28.4	25	14.8	28.4	0	2	0	0	2	992.582	7383.65	18644200	101	108
Mudpit_Aged L3 4 Anterior NP IAF	Mannan-binding lectin serine protease 2 OS=Homo sapiens GN=MASP2 PE=1 SV=4	O00187	MASP2	75703.4	2	2	2	LASPGFPGEYANDQER	R	R	0.997	60.1	25	16.8	60.1	0	1	0	0	2	1750.8	5470.74	10590500	30	45
Mudpit_Aged L3 4 Anterior NP IAF	Mannan-binding lectin serine protease 2 OS=Homo sapiens GN=MASP2 PE=1 SV=4	O00187	MASP2	75703.4	2	2	2	VEYITGPGVTTYK	R	A	0.986	30.1	25.6	14.9	30.1	0	1	0	0	2	1427.74	5368.21	5799990	377	389
Mudpit_Aged L3 4 Anterior NP IAF	Apolipoprotein F OS=Homo sapiens GN=APOF PE=1 SV=2	Q13790	APOF	35400.3	2	2	2	SGVQQLIQYYQDQK	R	D	0.997	60.8	29.8	16.8	60.8	0	1	0	0	2	1697.85	8639.28	5211800	251	264
Mudpit_Aged L3 4 Anterior NP IAF	Apolipoprotein F OS=Homo sapiens GN=APOF PE=1 SV=2	Q13790	APOF	35400.3	2	2	2	SYDLDPGAGSLEI	K	-	0.99	32.6	27.7	15	32.6	0	1	0	0	2	1336.63	8663.53	6003150	314	326
Mudpit_Aged L3 4 Anterior NP IAF	Meteorin-like protein OS=Homo sapiens GN=METRNL PE=2 SV=1	Q641Q3	METRNL	34397.9	2	2	2	SFTDSSGANIYLEK	R	T	0.997	94.8	31.2	18.9	94.8	0	1	0	0	2	1531.73	5752.63	3324310	110	123
Mudpit_Aged L3 4 Anterior NP IAF	Meteorin-like protein OS=Homo sapiens GN=METRNL PE=2 SV=1	Q641Q3	METRNL	34397.9	2	2	2	TTGFQYELVR	R	R	0.997	50.7	25	16.2	50.7	0	1	0	0	2	1213.62	5982.94	7412680	165	174
Mudpit_Aged L3 4 Anterior NP IAF	Zymogen granule membrane protein 16 OS=Homo sapiens GN=ZG16 PE=1 SV=2	O60844	ZG16	18147.1	2	2	3	VNTYYIVGLQVR	R	Y	0.997	38.7	25.8	15.4	38.7	0	1	0	0	2	1424.79	8245.42	4678980	56	67
Mudpit_Aged L3 4 Anterior NP IAF	Zymogen granule membrane protein 16 OS=Homo sapiens GN=ZG16 PE=1 SV=2	O60844	ZG16	18147.1	2	2	3	VWSDYVGGR	K	N	0.996	36.8	26.1	15.6	36.5	0	2	0	0	2	1038.5	4448.02	24377400	71	79
Mudpit_Aged L3 4 Anterior NP IAF	Alpha-1-acid glycoprotein 2 OS=Homo sapiens GN=ORM2 PE=1 SV=2	P19652	ORM2	23603.3	4	7	35	EHVAHLLFLR	R	D	0.964	30.9	25	14.9	30.9	0	0	1	0	2	1234.71	10527.7	892258	114	123
Mudpit_Aged L3 4 Anterior NP IAF	Alpha-1-acid glycoprotein 2 OS=Homo sapiens GN=ORM2 PE=1 SV=2	P19652	ORM2	23603.3	4	7	35	NWGLSFYADKPETTK	K	E	0.997	70.6	26	17.4	70.6	0	5	3	0	2	1756.85	8873.74	201175000	139	153
Mudpit_Aged L3 4 Anterior NP IAF	Alpha-1-acid glycoprotein 2 OS=Homo sapiens GN=ORM2 PE=1 SV=2	P19652	ORM2	23603.3	4	7	35	SDVMYTDWK	R	K	0.997	70.1	31.8	17.4	70.1	0	9	0	0	2	1144.5	4500.11	223336000	171	179
Mudpit_Aged L3 4 Anterior NP IAF	Alpha-1-acid glycoprotein 2 OS=Homo sapiens GN=ORM2 PE=1 SV=2	P19652	ORM2	23603.3	4	7	35	TEDTIFLR	K	E	0.99	61.3	26.6	18.7	59.4	0	13	0	0	2	994.52	5864.84	1413640000	74	81
Mudpit_Aged L3 4 Anterior NP IAF	Alpha-1-acid glycoprotein 2 OS=Homo sapiens GN=ORM2 PE=1 SV=2	P19652	ORM2	23603.3	4	7	35	TLMFGSYLDDEK	K	N	0.997	81.6	25	18.1	81.6	0	17	0	0	2	1434.65	7445.11	527932000	127	138
Mudpit_Aged L3 4 Anterior NP IAF	Alpha-1-acid glycoprotein 2 OS=Homo sapiens GN=ORM2 PE=1 SV=2	P19652	ORM2	23603.3	4	7	35	WFYIASAFR	K	N	0.995	36.7	27.1	15.3	36.7	0	1	0	0	2	1160.59	9033.02	80264400	43	51
Mudpit_Aged L3 4 Anterior NP IAF	cDNA FLJ75066, highly similar to Homo sapiens complement component 1, r subcomponent (C1R), mRNA OS=Homo sapiens PE=2 SV=1	A8K5J8,B4DPQ0,F5H2D0,P00736,Q53HT9,Q53HU9	C1R	80119.6	5	6	18	LPVANPQACENWLR	R	G	0.997	51.4	26.8	16.2	51.4	0	2	0	0	2	1668.82	7707.12	6126270	612	625
Mudpit_Aged L3 4 Anterior NP IAF	cDNA FLJ75066, highly similar to Homo sapiens complement component 1, r subcomponent (C1R), mRNA OS=Homo sapiens PE=2 SV=1	A8K5J8,B4DPQ0,F5H2D0,P00736,Q53HT9,Q53HU9	C1R	80119.6	5	6	18	QRPPDLDTSSNAVDLLFFTDESGDSR	K	G	0.997	95.9	25	19	95.9	0	0	1	0	2	2882.34	9288.71	29942600	271	296
Mudpit_Aged L3 4 Anterior NP IAF	cDNA FLJ75066, highly similar to Homo sapiens complement component 1, r subcomponent (C1R), mRNA OS=Homo sapiens PE=2 SV=1	A8K5J8,B4DPQ0,F5H2D0,P00736,Q53HT9,Q53HU9	C1R	80119.6	5	6	18	VLNYVDWIK	K	K	0.997	51.3	26.4	16.6	50.9	0	4	0	0	2	1149.63	8851.72	38428300	690	698
Mudpit_Aged L3 4 Anterior NP IAF	cDNA FLJ75066, highly similar to Homo sapiens complement component 1, r subcomponent (C1R), mRNA OS=Homo sapiens PE=2 SV=1	A8K5J8,B4DPQ0,F5H2D0,P00736,Q53HT9,Q53HU9	C1R	80119.6	5	6	18	WILTAAHTLYPK	R	E	0.99	49.3	26.6	16.1	0	0	0	2	0	2	1413.79	8517.97	18448700	496	507
Mudpit_Aged L3 4 Anterior NP IAF	cDNA FLJ75066, highly similar to Homo sapiens complement component 1, r subcomponent (C1R), mRNA OS=Homo sapiens PE=2 SV=1	A8K5J8,B4DPQ0,F5H2D0,P00736,Q53HT9,Q53HU9	C1R	80119.6	5	6	18	YTTTMGVNTYK	R	A	0.997	58.4	25	16.7	58.4	0	9	0	0	2	1294.6	2840.45	27533300	389	399
Mudpit_Aged L3 4 Anterior NP IAF	Mannan-binding lectin serine protease 1 OS=Homo sapiens GN=MASP1 PE=1 SV=3	P48740	MASP1	79247.4	3	3	3	APGELEHGLITFSTR	R	N	0.948	31.9	27	15	31.9	0	0	1	0	2	1627.84	9246.06	5698110	369	383
Mudpit_Aged L3 4 Anterior NP IAF	Mannan-binding lectin serine protease 1 OS=Homo sapiens GN=MASP1 PE=1 SV=3	P48740	MASP1	79247.4	3	3	3	DSDLLSPSDFK	R	I	0.986	30.6	25	17	28.5	0	1	0	0	2	1223.58	6843.02	5043710	505	515
Mudpit_Aged L3 4 Anterior NP IAF	Mannan-binding lectin serine protease 1 OS=Homo sapiens GN=MASP1 PE=1 SV=3	P48740	MASP1	79247.4	3	3	3	TGVITSPDFPNPYPK	R	S	0.997	54.7	28	16.4	54.7	0	1	0	0	2	1632.83	7460.25	5199650	194	208
Mudpit_Aged L3 4 Anterior NP IAF	cDNA FLJ77877, highly similar to Human ENO2 neuron specific (gamma) enolase OS=Homo sapiens PE=2 SV=1	A8K3B0,P09104,Q6FHV6	ENO2	47269.7	2	2	2	AAVPSGASTGIYEALELR	R	D	0.997	95	27.3	18.9	95	0	5	3	0	2	1804.94	8469.81	130310000	33	50
Mudpit_Aged L3 4 Anterior NP IAF	cDNA FLJ77877, highly similar to Human ENO2 neuron specific (gamma) enolase OS=Homo sapiens PE=2 SV=1	A8K3B0,P09104,Q6FHV6	ENO2	47269.7	2	2	2	IEEELGDEAR	R	F	0.997	51.6	25	32.6	35.2	0	1	0	0	2	1160.54	2904.63	6708340	413	422
Mudpit_Aged L3 4 Anterior NP IAF	cDNA FLJ77877, highly similar to Human ENO2 neuron specific (gamma) enolase OS=Homo sapiens PE=2 SV=1	A8K3B0,P09104,Q6FHV6	ENO2	47269.7	2	2	2	YITGDQLGALYQDFVR	R	D	0.997	82.6	26.2	18.2	82.6	0	1	0	0	2	1858.93	9300.13	7356450	270	285
Mudpit_Aged L3 4 Anterior NP IAF	Chondroadherin-like protein (Fragment) OS=Homo sapiens GN=CHADL PE=1 SV=1	H0Y4I5,Q6NUI6	CHADL	82391.1	2	2	3	ITEVSLGALGPAR	R	E	0.997	67.7	25	17.2	67.7	0	2	0	0	2	1283.73	6958.87	11108000	557	569
Mudpit_Aged L3 4 Anterior NP IAF	Chondroadherin-like protein (Fragment) OS=Homo sapiens GN=CHADL PE=1 SV=1	H0Y4I5,Q6NUI6	CHADL	82391.1	2	2	3	LGYLYLER	R	N	0.99	31.9	25	15	31.9	0	1	0	0	2	1026.56	6444.72	10616800	499	506
Mudpit_Aged L3 4 Anterior NP IAF	Apolipoprotein A-II OS=Homo sapiens GN=APOA2 PE=1 SV=1	P02652,V9GYM3	APOA2	11175.3	3	4	11	EQLTPLIK	K	K	0.99	37.6	25	15.4	37.6	0	5	0	0	2	941.567	5138.24	326206000	70	77
Mudpit_Aged L3 4 Anterior NP IAF	Apolipoprotein A-II OS=Homo sapiens GN=APOA2 PE=1 SV=1	P02652,V9GYM3	APOA2	11175.3	3	4	11	SPELQAEAK	K	S	0.997	53	25	16.3	53	0	1	0	0	2	972.5	2124.42	2320340	54	62
Mudpit_Aged L3 4 Anterior NP IAF	Apolipoprotein A-II OS=Homo sapiens GN=APOA2 PE=1 SV=1	P02652,V9GYM3	APOA2	11175.3	3	4	11	VKSPELQAEAK	K	S	0.997	61	27.2	16.8	61	0	2	3	0	2	1199.66	3459.77	29795900	52	62
Mudpit_Aged L3 4 Anterior NP IAF	Inter-alpha-trypsin inhibitor heavy chain H6 OS=Homo sapiens GN=ITIH6 PE=2 SV=1	Q6UXX5	ITIH6	143191	3	3	4	AYTITISR	R	S	0.99	42.9	25	20.7	37.9	0	1	0	0	2	924.515	4397.57	9621910	1154	1161
Mudpit_Aged L3 4 Anterior NP IAF	Inter-alpha-trypsin inhibitor heavy chain H6 OS=Homo sapiens GN=ITIH6 PE=2 SV=1	Q6UXX5	ITIH6	143191	3	3	4	IYEDTDAALQLK	R	G	0.997	61.9	27.4	16.9	61.9	0	2	0	0	2	1379.71	5878.78	8080240	452	463
Mudpit_Aged L3 4 Anterior NP IAF	Inter-alpha-trypsin inhibitor heavy chain H6 OS=Homo sapiens GN=ITIH6 PE=2 SV=1	Q6UXX5	ITIH6	143191	3	3	4	LSWDQPALLK	R	R	0.995	33.8	25	15.1	33.8	0	1	0	0	2	1170.65	8121.77	3230240	1174	1183
Mudpit_Aged L3 4 Anterior NP IAF	cDNA, FLJ95746, highly similar to Homo sapiens inhibin, beta C (INHBC), mRNA OS=Homo sapiens PE=2 SV=1	B2RBW9,P55103	INHBC	38237.9	2	2	2	ELLLDLAK	R	R	0.99	48	26.2	23.8	40.1	0	1	0	0	2	914.556	7431.75	5372460	41	48
Mudpit_Aged L3 4 Anterior NP IAF	cDNA, FLJ95746, highly similar to Homo sapiens inhibin, beta C (INHBC), mRNA OS=Homo sapiens PE=2 SV=1	B2RBW9,P55103	INHBC	38237.9	2	2	2	QEFFVDFR	R	E	0.975	28.6	25	14.8	28.6	0	1	0	0	2	1087.52	7796.39	8641810	250	257
Mudpit_Aged L3 4 Anterior NP IAF	Annexin (Fragment) OS=Homo sapiens GN=ANXA6 PE=2 SV=1	A0A0S2Z2Z6,P08133	ANXA6	75877.5	4	4	4	DAFVAIVQSVK	R	N	0.996	35.3	25.8	15.2	35.3	0	1	0	0	2	1176.66	8477.24	4133180	588	598
Mudpit_Aged L3 4 Anterior NP IAF	Annexin (Fragment) OS=Homo sapiens GN=ANXA6 PE=2 SV=1	A0A0S2Z2Z6,P08133	ANXA6	75877.5	4	4	4	SEIDLLNIR	R	R	0.997	41.7	27.5	15.6	41.7	0	1	0	0	2	1072.6	7792.86	7579690	630	638
Mudpit_Aged L3 4 Anterior NP IAF	Annexin (Fragment) OS=Homo sapiens GN=ANXA6 PE=2 SV=1	A0A0S2Z2Z6,P08133	ANXA6	75877.5	4	4	4	SEISGDLAR	K	L	0.993	41.5	29.6	25.5	31.6	0	1	0	0	2	947.479	2942.06	6258440	419	427
Mudpit_Aged L3 4 Anterior NP IAF	Annexin (Fragment) OS=Homo sapiens GN=ANXA6 PE=2 SV=1	A0A0S2Z2Z6,P08133	ANXA6	75877.5	4	4	4	SLEDALSSDTSGHFR	K	R	0.991	46.3	25	15.9	46.3	0	0	1	0	2	1621.75	6481.68	5366010	484	498
Mudpit_Aged L3 4 Anterior NP IAF	SIL1-like protein endoplasmic reticulum chaperone isoform 1 (Fragment) OS=Homo sapiens GN=SIL1 PE=2 SV=1	A0A0S2Z6B4,D6REA1,Q9H173	SIL1	52085.8	3	3	4	GTEVLAVR	K	V	0.99	43	28.9	29.2	29.5	0	1	0	0	2	844.489	3408.75	4591870	324	331
Mudpit_Aged L3 4 Anterior NP IAF	SIL1-like protein endoplasmic reticulum chaperone isoform 1 (Fragment) OS=Homo sapiens GN=SIL1 PE=2 SV=1	A0A0S2Z6B4,D6REA1,Q9H173	SIL1	52085.8	3	3	4	MFAEEEAELTQEMSPEK	K	L	0.997	107	25	19.7	107	0	2	0	0	2	1998.87	8033.7	3202380	344	360
Mudpit_Aged L3 4 Anterior NP IAF	SIL1-like protein endoplasmic reticulum chaperone isoform 1 (Fragment) OS=Homo sapiens GN=SIL1 PE=2 SV=1	A0A0S2Z6B4,D6REA1,Q9H173	SIL1	52085.8	3	3	4	VQVEAIEGGALQK	K	L	0.997	40.7	25.9	15.5	40.7	0	1	0	0	2	1341.74	5097.85	6781450	260	272
Mudpit_Aged L3 4 Anterior NP IAF	cDNA FLJ34625 fis, clone KIDNE2015244, highly similar to Serine protease HTRA1 (EC 3.4.21.-) OS=Homo sapiens PE=2 SV=1	B3KRN4,Q05DJ8,Q92743	HTRA1	51287.3	12	17	73	DFPDVISGAYIIEVIPDTPAEAGGLK	R	E	0.997	109	26.2	19.8	109	0	2	1	0	2	2687.38	9452.11	53670700	404	429
Mudpit_Aged L3 4 Anterior NP IAF	cDNA FLJ34625 fis, clone KIDNE2015244, highly similar to Serine protease HTRA1 (EC 3.4.21.-) OS=Homo sapiens PE=2 SV=1	B3KRN4,Q05DJ8,Q92743	HTRA1	51287.3	12	17	73	ESTLNMVVR	R	R	0.997	77	27.2	17.8	77	0	10	0	0	2	1064.54	3438.57	132357000	455	463
Mudpit_Aged L3 4 Anterior NP IAF	cDNA FLJ34625 fis, clone KIDNE2015244, highly similar to Serine protease HTRA1 (EC 3.4.21.-) OS=Homo sapiens PE=2 SV=1	B3KRN4,Q05DJ8,Q92743	HTRA1	51287.3	12	17	73	EVPVASGSGFIVSEDGLIVTNAHVVTNK	R	H	0.997	71.3	25	17.5	71.3	0	0	1	0	2	2839.48	9186.41	11491700	198	225
Mudpit_Aged L3 4 Anterior NP IAF	cDNA FLJ34625 fis, clone KIDNE2015244, highly similar to Serine protease HTRA1 (EC 3.4.21.-) OS=Homo sapiens PE=2 SV=1	B3KRN4,Q05DJ8,Q92743	HTRA1	51287.3	12	17	73	IAPAVVHIELFR	K	K	0.997	43.4	25	15.7	43.4	0	2	4	0	2	1364.8	9188.02	208876000	179	190
Mudpit_Aged L3 4 Anterior NP IAF	cDNA FLJ34625 fis, clone KIDNE2015244, highly similar to Serine protease HTRA1 (EC 3.4.21.-) OS=Homo sapiens PE=2 SV=1	B3KRN4,Q05DJ8,Q92743	HTRA1	51287.3	12	17	73	LHRPPVIVLQR	R	G	0.987	43.7	25	15.7	43.7	0	0	1	0	2	1327.83	8828.05	44593300	142	152
Mudpit_Aged L3 4 Anterior NP IAF	cDNA FLJ34625 fis, clone KIDNE2015244, highly similar to Serine protease HTRA1 (EC 3.4.21.-) OS=Homo sapiens PE=2 SV=1	B3KRN4,Q05DJ8,Q92743	HTRA1	51287.3	12	17	73	LPVLLLGR	K	S	0.99	50.6	25	33.8	32.9	0	7	0	0	2	880.598	7892.24	769996000	262	269
Mudpit_Aged L3 4 Anterior NP IAF	cDNA FLJ34625 fis, clone KIDNE2015244, highly similar to Serine protease HTRA1 (EC 3.4.21.-) OS=Homo sapiens PE=2 SV=1	B3KRN4,Q05DJ8,Q92743	HTRA1	51287.3	12	17	73	MMSLTSSK	R	A	0.983	29.5	25	14.8	29.5	0	1	0	0	2	884.422	3118.27	2602160	387	394
Mudpit_Aged L3 4 Anterior NP IAF	cDNA FLJ34625 fis, clone KIDNE2015244, highly similar to Serine protease HTRA1 (EC 3.4.21.-) OS=Homo sapiens PE=2 SV=1	B3KRN4,Q05DJ8,Q92743	HTRA1	51287.3	12	17	73	RESTLNMVVR	K	R	0.967	37	26.6	15.3	37	0	0	1	0	2	1204.65	5341.05	13663600	454	463
Mudpit_Aged L3 4 Anterior NP IAF	cDNA FLJ34625 fis, clone KIDNE2015244, highly similar to Serine protease HTRA1 (EC 3.4.21.-) OS=Homo sapiens PE=2 SV=1	B3KRN4,Q05DJ8,Q92743	HTRA1	51287.3	12	17	73	RGNEDIMITVIPEEIDP	R	-	0.997	52.1	27.2	16.3	52.1	0	5	0	0	2	1956.96	9343.34	94515800	464	480
Mudpit_Aged L3 4 Anterior NP IAF	cDNA FLJ34625 fis, clone KIDNE2015244, highly similar to Serine protease HTRA1 (EC 3.4.21.-) OS=Homo sapiens PE=2 SV=1	B3KRN4,Q05DJ8,Q92743	HTRA1	51287.3	12	17	73	SSELRPGEFVVAIGSPFSLQNTVTTGIVSTTQR	R	G	0.997	99.7	25	19.2	99.7	0	0	8	3	2	3478.82	9669.96	59165900	270	302
Mudpit_Aged L3 4 Anterior NP IAF	cDNA FLJ34625 fis, clone KIDNE2015244, highly similar to Serine protease HTRA1 (EC 3.4.21.-) OS=Homo sapiens PE=2 SV=1	B3KRN4,Q05DJ8,Q92743	HTRA1	51287.3	12	17	73	VTAGISFAIPSDK	K	I	0.997	93.6	25.9	18.8	93.6	0	18	0	0	2	1305.7	7366.58	516971000	347	359
Mudpit_Aged L3 4 Anterior NP IAF	cDNA FLJ34625 fis, clone KIDNE2015244, highly similar to Serine protease HTRA1 (EC 3.4.21.-) OS=Homo sapiens PE=2 SV=1	B3KRN4,Q05DJ8,Q92743	HTRA1	51287.3	12	17	73	YNFIADVVEK	K	I	0.997	63.3	25	17	63.3	0	9	0	0	2	1197.62	7762.4	166782000	169	178
Mudpit_Aged L3 4 Anterior NP IAF	Chloride intracellular channel protein 1 OS=Homo sapiens GN=CLIC1 PE=1 SV=4	A0A1U9X8Y4_HUMAN,O00299,Q53FB0,Q5SRT3	CLIC1	26923.3	3	3	4	GVTFNVTTVDTK	K	R	0.997	48.1	26	16	48.1	0	1	0	0	2	1281.67	5390.31	6943290	38	49
Mudpit_Aged L3 4 Anterior NP IAF	Chloride intracellular channel protein 1 OS=Homo sapiens GN=CLIC1 PE=1 SV=4	A0A1U9X8Y4_HUMAN,O00299,Q53FB0,Q5SRT3	CLIC1	26923.3	3	3	4	LAALNPESNTAGLDIFAK	K	F	0.997	73.6	26.9	17.6	73.6	0	1	0	0	2	1844.98	9019.11	2772700	96	113
Mudpit_Aged L3 4 Anterior NP IAF	Chloride intracellular channel protein 1 OS=Homo sapiens GN=CLIC1 PE=1 SV=4	A0A1U9X8Y4_HUMAN,O00299,Q53FB0,Q5SRT3	CLIC1	26923.3	3	3	4	VLDNYLTSPLPEEVDETSAEDEGVSQR	K	K	0.997	66.8	25.2	17.2	66.8	0	0	2	0	2	2992.39	8487.71	3974050	139	165
Mudpit_Aged L3 4 Anterior NP IAF	L-lactate dehydrogenase A chain OS=Homo sapiens GN=LDHA PE=1 SV=2	P00338,V9HWB9	HEL-S-133P,LDHA	36689.2	6	6	8	DLADELALVDVIEDK	K	L	0.997	81	26.5	18.1	81	0	1	0	0	2	1657.85	9370.7	31170700	43	57
Mudpit_Aged L3 4 Anterior NP IAF	L-lactate dehydrogenase A chain OS=Homo sapiens GN=LDHA PE=1 SV=2	P00338,V9HWB9	HEL-S-133P,LDHA	36689.2	6	6	8	DQLIYNLLK	K	E	0.977	27.6	25	14.7	27.6	0	1	0	0	2	1119.64	8550.83	5803030	6	14
Mudpit_Aged L3 4 Anterior NP IAF	L-lactate dehydrogenase A chain OS=Homo sapiens GN=LDHA PE=1 SV=2	P00338,V9HWB9	HEL-S-133P,LDHA	36689.2	6	6	8	GEMMDLQHGSLFLR	K	T	0.977	34.5	25.3	15.2	11.7	0	0	1	0	2	1649.78	9023.54	13045800	60	73
Mudpit_Aged L3 4 Anterior NP IAF	L-lactate dehydrogenase A chain OS=Homo sapiens GN=LDHA PE=1 SV=2	P00338,V9HWB9	HEL-S-133P,LDHA	36689.2	6	6	8	QVVESAYEVIK	K	L	0.997	61.7	26.4	16.9	61.7	0	2	0	0	2	1264.68	5515.98	31314600	233	243
Mudpit_Aged L3 4 Anterior NP IAF	L-lactate dehydrogenase A chain OS=Homo sapiens GN=LDHA PE=1 SV=2	P00338,V9HWB9	HEL-S-133P,LDHA	36689.2	6	6	8	SADTLWGIQK	K	E	0.997	59.7	27.6	16.7	59.7	0	2	0	0	2	1118.58	6174.85	14155300	319	328
Mudpit_Aged L3 4 Anterior NP IAF	L-lactate dehydrogenase A chain OS=Homo sapiens GN=LDHA PE=1 SV=2	P00338,V9HWB9	HEL-S-133P,LDHA	36689.2	6	6	8	VTLTSEEEAR	K	L	0.997	51.1	28.3	16.5	50.8	0	1	0	0	2	1134.56	2657.77	4169150	306	315
Mudpit_Aged L3 4 Anterior NP IAF	Extracellular superoxide dismutase [Cu-Zn] OS=Homo sapiens GN=SOD3 PE=1 SV=2	A0A140VJU8_HUMAN,P08294	SOD3	25850.3	3	4	13	AVVVHAGEDDLGR	R	G	0.992	44.6	25.3	15.8	44.6	0	0	6	0	2	1337.68	4288.58	89638800	177	189
Mudpit_Aged L3 4 Anterior NP IAF	Extracellular superoxide dismutase [Cu-Zn] OS=Homo sapiens GN=SOD3 PE=1 SV=2	A0A140VJU8_HUMAN,P08294	SOD3	25850.3	3	4	13	VTEIWQEVMQR	K	R	0.997	75.1	27	17.7	75.1	0	5	0	0	2	1418.71	6919.89	99107700	42	52
Mudpit_Aged L3 4 Anterior NP IAF	Extracellular superoxide dismutase [Cu-Zn] OS=Homo sapiens GN=SOD3 PE=1 SV=2	A0A140VJU8_HUMAN,P08294	SOD3	25850.3	3	4	13	VTGVVLFR	R	Q	0.99	42.1	25	15.6	42.1	0	2	0	0	2	890.546	6158.54	22526300	78	85
Mudpit_Aged L3 4 Anterior NP IAF	Stromal cell-derived factor 1 OS=Homo sapiens GN=CXCL12 PE=1 SV=1	P48061	CXCL12	10665.9	3	3	3	FFESHVAR	R	A	0.99	38.2	26.3	30.9	22.7	0	1	0	0	2	992.495	5921.14	4759760	34	41
Mudpit_Aged L3 4 Anterior NP IAF	Stromal cell-derived factor 1 OS=Homo sapiens GN=CXCL12 PE=1 SV=1	P48061	CXCL12	10665.9	3	3	3	ILNTPNCALQIVAR	K	L	0.997	90.8	26.6	18.7	90.8	0	1	0	0	2	1583.86	7481.98	6969480	49	62
Mudpit_Aged L3 4 Anterior NP IAF	Stromal cell-derived factor 1 OS=Homo sapiens GN=CXCL12 PE=1 SV=1	P48061	CXCL12	10665.9	3	3	3	WIQEYLEK	K	A	0.951	28	26.4	14.8	28	0	1	0	0	2	1108.57	6912.26	6320350	78	85
Mudpit_Aged L3 4 Anterior NP IAF	Beta-hexosaminidase OS=Homo sapiens PE=2 SV=1	B4DVA7,Q9BVJ8	HEXA	47095.3	2	2	2	IQPDTIIQVWR	K	E	0.997	66.4	25	17.1	66.4	0	1	0	0	2	1368.76	8947.29	8323560	263	273
Mudpit_Aged L3 4 Anterior NP IAF	Beta-hexosaminidase OS=Homo sapiens PE=2 SV=1	B4DVA7,Q9BVJ8	HEXA	47095.3	2	2	2	LTSDLTFAYER	K	L	0.982	31	28.4	14.9	31	0	1	0	0	2	1315.65	6224.44	7921360	369	379
Mudpit_Aged L3 4 Anterior NP IAF	Carbohydrate sulfotransferase 14 OS=Homo sapiens GN=CHST14 PE=1 SV=2	Q8NCH0	CHST14	42998	2	2	3	VLAGVLDSVDVR	K	L	0.997	74.9	26.8	19.8	72.8	0	1	0	0	2	1242.71	6424.47	10537000	168	179
Mudpit_Aged L3 4 Anterior NP IAF	Carbohydrate sulfotransferase 14 OS=Homo sapiens GN=CHST14 PE=1 SV=2	Q8NCH0	CHST14	42998	2	2	3	YLVDEDPER	R	M	0.997	45.6	25	15.9	45.6	0	2	0	0	2	1135.53	4095.99	4851390	266	274
Mudpit_Aged L3 4 Anterior NP IAF	Immunglobulin heavy chain variable region (Fragment) OS=Homo sapiens PE=4 SV=1	HV349_HUMAN,Q0ZCH6		0	2	2	3	AYGGTTEYAASVK	K	G	0.997	45.8	25	15.9	45.8	0	2	0	0	2	1317.63	3361.95	6989670	0	0
Mudpit_Aged L3 4 Anterior NP IAF	Immunglobulin heavy chain variable region (Fragment) OS=Homo sapiens PE=4 SV=1	HV349_HUMAN,Q0ZCH6		0	2	2	3	GLEWVGFIR	K	S	0.995	36.8	26.9	15.3	36.8	0	1	0	0	2	1076.59	9005.85	18784800	0	0
Mudpit_Aged L3 4 Anterior NP IAF	cDNA, FLJ96197, highly similar to Homo sapiens connective tissue growth factor (CTGF), mRNA OS=Homo sapiens PE=2 SV=1	B2RCP7,B3KRV6,B3KWK5,P29279,Q5M8T4,Q6FHL8	CTGF	38090.7	2	2	2	LEDTFGPDPTMIR	R	A	0.997	55.4	25.4	16.5	55.4	0	1	0	0	2	1491.72	6927.14	6958010	184	196
Mudpit_Aged L3 4 Anterior NP IAF	cDNA, FLJ96197, highly similar to Homo sapiens connective tissue growth factor (CTGF), mRNA OS=Homo sapiens PE=2 SV=1	B2RCP7,B3KRV6,B3KWK5,P29279,Q5M8T4,Q6FHL8	CTGF	38090.7	2	2	2	TTTLPVEFK	R	C	0.997	50.5	28.3	16.2	50.5	0	1	0	0	2	1035.57	5576.61	11804700	298	306
Mudpit_Aged L3 4 Anterior NP IAF	Collagen alpha-1(VII) chain OS=Homo sapiens GN=COL7A1 PE=1 SV=2	Q02388	COL7A1	295218	8	9	10	DLVLSEPSSQSLR	R	V	0.997	39.1	25.8	15.4	39.1	0	1	0	0	2	1430.75	5823.4	9384420	237	249
Mudpit_Aged L3 4 Anterior NP IAF	Collagen alpha-1(VII) chain OS=Homo sapiens GN=COL7A1 PE=1 SV=2	Q02388	COL7A1	295218	8	9	10	LSVLGPAGEGPSAEVTAR	R	T	0.997	74.5	26.5	17.7	74.5	0	1	0	0	2	1710.9	6014.67	8353710	934	951
Mudpit_Aged L3 4 Anterior NP IAF	Collagen alpha-1(VII) chain OS=Homo sapiens GN=COL7A1 PE=1 SV=2	Q02388	COL7A1	295218	8	9	10	QEVNVPAGETSVR	R	L	0.997	44.4	26.1	15.8	44.4	0	1	0	0	2	1385.7	3375.9	7934210	281	293
Mudpit_Aged L3 4 Anterior NP IAF	Collagen alpha-1(VII) chain OS=Homo sapiens GN=COL7A1 PE=1 SV=2	Q02388	COL7A1	295218	8	9	10	SQDLVDTAAQR	K	L	0.997	37.1	27.5	15.3	37.1	0	1	0	0	2	1203.6	2970.12	6574520	152	162
Mudpit_Aged L3 4 Anterior NP IAF	Collagen alpha-1(VII) chain OS=Homo sapiens GN=COL7A1 PE=1 SV=2	Q02388	COL7A1	295218	8	9	10	TEFGLDALGSGGDVIR	R	A	0.997	77.8	30.7	17.9	77.8	0	1	0	0	2	1606.81	8154.84	6459270	90	105
Mudpit_Aged L3 4 Anterior NP IAF	Collagen alpha-1(VII) chain OS=Homo sapiens GN=COL7A1 PE=1 SV=2	Q02388	COL7A1	295218	8	9	10	VLSGGPTQQQELGPGQGSVLLR	R	D	0.997	69.8	25	17.4	69.8	0	1	1	0	2	2221.19	6927.2	5938930	362	383
Mudpit_Aged L3 4 Anterior NP IAF	Collagen alpha-1(VII) chain OS=Homo sapiens GN=COL7A1 PE=1 SV=2	Q02388	COL7A1	295218	8	9	10	VQYTPLTGLGQPLPSER	K	Q	0.997	102	25.7	19.5	101	0	2	0	0	2	1855.99	8157.85	4767760	264	280
Mudpit_Aged L3 4 Anterior NP IAF	Collagen alpha-1(VII) chain OS=Homo sapiens GN=COL7A1 PE=1 SV=2	Q02388	COL7A1	295218	8	9	10	VVLPSDVTR	K	Y	0.995	36.1	26.2	31.4	20	0	1	0	0	2	985.568	4282.38	11280400	460	468
Mudpit_Aged L3 4 Anterior NP IAF	Keratin, type I cytoskeletal 9 OS=Homo sapiens GN=KRT9 PE=1 SV=3	P35527	KRT9	62065.9	6	6	7	EIETYHNLLEGGQEDFESSGAGK	K	I	0.997	68.3	25	17.3	68.3	0	0	2	0	2	2510.13	7988.28	7031700	450	472
Mudpit_Aged L3 4 Anterior NP IAF	Keratin, type I cytoskeletal 9 OS=Homo sapiens GN=KRT9 PE=1 SV=3	P35527	KRT9	62065.9	6	6	7	GGGGSFGYSYGGGSGGGFSASSLGGGFGGGSR	R	G	0.997	152	25	22.5	152	0	1	0	0	2	2705.16	7771.98	5264810	64	95
Mudpit_Aged L3 4 Anterior NP IAF	Keratin, type I cytoskeletal 9 OS=Homo sapiens GN=KRT9 PE=1 SV=3	P35527	KRT9	62065.9	6	6	7	IKFEMEQNLR	R	Q	0.997	73.6	27.1	20.4	70.8	0	0	1	0	2	1307.68	6387.02	14539800	241	250
Mudpit_Aged L3 4 Anterior NP IAF	Keratin, type I cytoskeletal 9 OS=Homo sapiens GN=KRT9 PE=1 SV=3	P35527	KRT9	62065.9	6	6	7	QEYEQLIAK	R	N	0.981	29.8	27.3	17.4	27.3	0	1	0	0	2	1121.58	4656.6	6064900	328	336
Mudpit_Aged L3 4 Anterior NP IAF	Keratin, type I cytoskeletal 9 OS=Homo sapiens GN=KRT9 PE=1 SV=3	P35527	KRT9	62065.9	6	6	7	TLLDIDNTR	K	M	0.997	53	29.1	17.8	51.6	0	1	0	0	2	1060.56	5158.79	6999830	225	233
Mudpit_Aged L3 4 Anterior NP IAF	Keratin, type I cytoskeletal 9 OS=Homo sapiens GN=KRT9 PE=1 SV=3	P35527	KRT9	62065.9	6	6	7	VQALEEANNDLENK	K	I	0.997	62.5	25.2	16.9	62.5	0	1	0	0	2	1586.77	4731.12	2441680	171	184
Mudpit_Aged L3 4 Anterior NP IAF	Stromelysin-1 OS=Homo sapiens GN=MMP3 PE=1 SV=2	P08254	MMP3	53979.1	4	4	5	FLGLEVTGK	K	L	0.997	42.5	25.1	15.7	42.5	0	2	0	0	2	963.551	7121.04	8750540	70	78
Mudpit_Aged L3 4 Anterior NP IAF	Stromelysin-1 OS=Homo sapiens GN=MMP3 PE=1 SV=2	P08254	MMP3	53979.1	4	4	5	IVNYTPDLPK	R	D	0.997	55.3	27.7	18.3	53.5	0	1	0	0	2	1159.64	6019.76	3422900	118	127
Mudpit_Aged L3 4 Anterior NP IAF	Stromelysin-1 OS=Homo sapiens GN=MMP3 PE=1 SV=2	P08254	MMP3	53979.1	4	4	5	LDSDTLEVMR	K	K	0.997	72.3	26.1	18	71.8	0	1	0	0	2	1178.57	5625.62	6379310	79	88
Mudpit_Aged L3 4 Anterior NP IAF	Stromelysin-1 OS=Homo sapiens GN=MMP3 PE=1 SV=2	P08254	MMP3	53979.1	4	4	5	QIAEDFPGIDSK	K	I	0.997	60.6	26.7	16.8	60.6	0	1	0	0	2	1319.65	6177.06	14023800	425	436
Mudpit_Aged L3 4 Anterior NP IAF	Matrix metallopeptidase 2 (Gelatinase A, 72kDa gelatinase, 72kDa type IV collagenase), isoform CRA_a OS=Homo sapiens GN=MMP2 PE=4 SV=1	A0A024R6R4,P08253	MMP2	73885.1	7	9	14	AFQVWSDVTPLR	R	F	0.997	44	28.1	15.8	44	0	1	0	0	2	1418.74	8707.15	23034500	147	158
Mudpit_Aged L3 4 Anterior NP IAF	Matrix metallopeptidase 2 (Gelatinase A, 72kDa gelatinase, 72kDa type IV collagenase), isoform CRA_a OS=Homo sapiens GN=MMP2 PE=4 SV=1	A0A024R6R4,P08253	MMP2	73885.1	7	9	14	FFGLPQTGDLDQNTIETMR	K	K	0.997	102	25.4	19.4	102	0	2	0	0	2	2183.04	8988.59	15383900	80	98
Mudpit_Aged L3 4 Anterior NP IAF	Matrix metallopeptidase 2 (Gelatinase A, 72kDa gelatinase, 72kDa type IV collagenase), isoform CRA_a OS=Homo sapiens GN=MMP2 PE=4 SV=1	A0A024R6R4,P08253	MMP2	73885.1	7	9	14	FPGDVAPK	K	T	0.99	36.8	26.6	21.4	30.7	0	1	0	0	2	830.441	3182.58	5620180	37	44
Mudpit_Aged L3 4 Anterior NP IAF	Matrix metallopeptidase 2 (Gelatinase A, 72kDa gelatinase, 72kDa type IV collagenase), isoform CRA_a OS=Homo sapiens GN=MMP2 PE=4 SV=1	A0A024R6R4,P08253	MMP2	73885.1	7	9	14	IDAVYEAPQEEK	K	A	0.995	35.6	25	15.2	35.6	0	3	0	0	2	1391.67	3844.77	6666610	520	531
Mudpit_Aged L3 4 Anterior NP IAF	Matrix metallopeptidase 2 (Gelatinase A, 72kDa gelatinase, 72kDa type IV collagenase), isoform CRA_a OS=Homo sapiens GN=MMP2 PE=4 SV=1	A0A024R6R4,P08253	MMP2	73885.1	7	9	14	IHDGEADIMINFGR	R	W	0.991	44.4	25	23.7	36.5	0	0	3	0	2	1603.75	6586.97	27130300	162	175
Mudpit_Aged L3 4 Anterior NP IAF	Matrix metallopeptidase 2 (Gelatinase A, 72kDa gelatinase, 72kDa type IV collagenase), isoform CRA_a OS=Homo sapiens GN=MMP2 PE=4 SV=1	A0A024R6R4,P08253	MMP2	73885.1	7	9	14	IIGYTPDLDPETVDDAFAR	R	A	0.997	89.8	26.3	18.6	89.8	0	3	0	0	2	2108.02	8936.98	36962700	128	146
Mudpit_Aged L3 4 Anterior NP IAF	Matrix metallopeptidase 2 (Gelatinase A, 72kDa gelatinase, 72kDa type IV collagenase), isoform CRA_a OS=Homo sapiens GN=MMP2 PE=4 SV=1	A0A024R6R4,P08253	MMP2	73885.1	7	9	14	VDAAFNWSK	R	N	0.997	40.3	25.9	15.5	40.3	0	1	0	0	2	1037.51	6090.72	5862290	568	576
Mudpit_Aged L3 4 Anterior NP IAF	Coagulation factor V OS=Homo sapiens GN=F5 PE=1 SV=1	A0A0A0MRJ7,P12259	F5	251710	7	7	9	ASEFLGYWEPR	K	L	0.997	39.3	25	15.5	39.3	0	1	0	0	2	1354.64	8916.88	8204100	1925	1935
[truncated: 13,949 more rows]
