# Supplementary material for: Peptide Location Fingerprinting Reveals Tissue Region-specific Differences in Protein Structures in an Ageing Human Organ
Source: Preprints.org preprint supplement (doi:10.20944/preprints202107.0670.v1), 2021-07-29
Supplement: Supplementary file 4 [file Table S4_Peptide location fingerprinting of posterior inner AF.xlsx]

## Sheet: PLF of 50 aa protein segments 
Table S4: Full peptide location fingerprinting analysis of posterior inner AF IVD datasets. Protein primary sequences were computationally divided into 50 aa-sized segments and peptide sequences, and their spectrum counts, were mapped and summed within each segment. Peptide counts per segment were then normalised between aged and young groups based on the median whole protein spectrum count and a…
								Normalised peptide spectrum match count											Raw peptide spectrum match count
Gene	Protein Name	Uniprot AC	Domain_Name	Domain_Start	Domain_Finish	Domain Type	Domain_Length	Mudpit_Aged L3_4 Posterior NP IAF	Mudpit_Aged L4_5 Posterior NP IAF	Mudpit_Aged L5_S1 Posterior NP AF	Mudpit_Young L3_4 Posterior NP IAF	Mudpit_Young L5_S1 Posterior NP IAF	Diff Young vs Aged	p: Young vs Aged	Average Aged	Average Young	Peptides Aged	Peptides Young	Original_Mudpit_Aged L3_4 Posterior NP IAF	Original_Mudpit_Aged L4_5 Posterior NP IAF	Original_Mudpit_Aged L5_S1 Posterior NP AF	Original_Mudpit_Young L3_4 Posterior NP IAF	Original_Mudpit_Young L5_S1 Posterior NP IAF
A2M	Alpha-2-macroglobulin	A2MG_HUMAN	50Step_Domain_p700.0_to_750.0	700	750	50.0 AA STEP	50	16	10	14	25	32	-0.3	0.024	13	28	LVHVEEPHTETVR VGFYESDVMGR LVHVEEPHTETVR VGFYESDVMGR LVHVEEPHTETVR VGFYESDVMGR	LVHVEEPHTETVR VGFYESDVMGR LVHVEEPHTETVR VGFYESDVMGR	22	17	21	9	11
A2M	Alpha-2-macroglobulin	A2MG_HUMAN	50Step_Domain_p200.0_to_250.0	200	250	50.0 AA STEP	50	16	13	40	14	30	0.02	1	23	22	FEVQVTVPK QFSFPLSSEPFQGSYK TEHPFTVEEFVLPK FEVQVTVPK QFSFPLSSEPFQGSYK TEHPFTVEEFVLPK FEVQVTVPK QFSFPLSSEPFQGSYK TEHPFTVEEFVLPK	FEVQVTVPK QFSFPLSSEPFQGSYK TEHPFTVEEFVLPK FEVQVTVPK QFSFPLSSEPFQGSYK	22	22	60	5	10
A2M	Alpha-2-macroglobulin	A2MG_HUMAN	50Step_Domain_p850.0_to_900.0	850	900	50.0 AA STEP	50	18	8	12	22	21	-0.18	1	13	22	DTVIKPLLVEPEGLEK QTVSWAVTPK DTVIKPLLVEPEGLEK QTVSWAVTPK DTVIKPLLVEPEGLEK QTVSWAVTPK	DTVIKPLLVEPEGLEK QTVSWAVTPK DTVIKPLLVEPEGLEK QTVSWAVTPK	24	14	18	8	7
A2M	Alpha-2-macroglobulin	A2MG_HUMAN	50Step_Domain_p900.0_to_950.0	900	950	50.0 AA STEP	50	25	17	18	27	12	0	1	20	20	DTVIKPLLVEPEGLEK ETTFNSLLCPSGGEVSEELSLK LPPNVVEESAR DTVIKPLLVEPEGLEK ETTFNSLLCPSGGEVSEELSLK LPPNVVEESAR DTVIKPLLVEPEGLEK ETTFNSLLCPSGGEVSEELSLK LPPNVVEESAR	DTVIKPLLVEPEGLEK LPPNVVEESAR DTVIKPLLVEPEGLEK	34	28	27	10	4
A2M	Alpha-2-macroglobulin	A2MG_HUMAN	50Step_Domain_p1250.0_to_1300.0	1250	1300	50.0 AA STEP	50	15	22	24	16	21	0.04	1	20	18	AAQVTIQSSGTFSSK LLLQQVSLPELPGEYSMK QQNAQGGFSSTQDTVVALHALSK YGAATFTR AAQVTIQSSGTFSSK LLLQQVSLPELPGEYSMK QQNAQGGFSSTQDTVVALHALSK AAQVTIQSSGTFSSK LLLQQVSLPELPGEYSMK QQNAQGGFSSTQDTVVALHALSK YGAATFTR	LLLQQVSLPELPGEYSMK AAQVTIQSSGTFSSK LLLQQVSLPELPGEYSMK	20	37	35	6	7
A2M	Alpha-2-macroglobulin	A2MG_HUMAN	50Step_Domain_p1300.0_to_1350.0	1300	1350	50.0 AA STEP	50	5	9	9	16	18	-0.18	1	8	17	LLLQQVSLPELPGEYSMK LLLQQVSLPELPGEYSMK LLLQQVSLPELPGEYSMK	LLLQQVSLPELPGEYSMK LLLQQVSLPELPGEYSMK	7	15	14	6	6
A2M	Alpha-2-macroglobulin	A2MG_HUMAN	50Step_Domain_p150.0_to_200.0	150	200	50.0 AA STEP	50	10	13	7	11	21	-0.12	1	10	16	IAQWQSFQLEGGLK QFSFPLSSEPFQGSYK VVSMDENFHPLNELIPLVYIQDPK IAQWQSFQLEGGLK QFSFPLSSEPFQGSYK VVSMDENFHPLNELIPLVYIQDPK IAQWQSFQLEGGLK QFSFPLSSEPFQGSYK VVSMDENFHPLNELIPLVYIQDPK	IAQWQSFQLEGGLK QFSFPLSSEPFQGSYK IAQWQSFQLEGGLK QFSFPLSSEPFQGSYK	14	21	10	4	7
A2M	Alpha-2-macroglobulin	A2MG_HUMAN	50Step_Domain_p800.0_to_850.0	800	850	50.0 AA STEP	50	13	9	8	14	12	-0.06	1	10	13	AFQPFFVELTMPYSVIR ATVLNYLPK VSVQLEASPAFLAVPVEK AFQPFFVELTMPYSVIR ATVLNYLPK VSVQLEASPAFLAVPVEK ATVLNYLPK VSVQLEASPAFLAVPVEK	ATVLNYLPK VSVQLEASPAFLAVPVEK ATVLNYLPK VSVQLEASPAFLAVPVEK	18	15	12	5	4
A2M	Alpha-2-macroglobulin	A2MG_HUMAN	50Step_Domain_p100.0_to_150.0	100	150	50.0 AA STEP	50	13	17	10	16	9	0.02	1	13	12	NEDSLVFVQTDK SSSNEEVMFLTVQVK VVSMDENFHPLNELIPLVYIQDPK NEDSLVFVQTDK SSSNEEVMFLTVQVK VVSMDENFHPLNELIPLVYIQDPK NEDSLVFVQTDK SSSNEEVMFLTVQVK VVSMDENFHPLNELIPLVYIQDPK	NEDSLVFVQTDK SSSNEEVMFLTVQVK NEDSLVFVQTDK	17	28	15	6	3
A2M	Alpha-2-macroglobulin	A2MG_HUMAN	50Step_Domain_p1400.0_to_1450.0	1400	1450	50.0 AA STEP	50	7	7	18	8	15	-0.02	1	11	12	TEVSSNHVLIYLDK TEVSSNHVLIYLDK VSNQTLSLFFTVLQDVPVR DLKPAIVK TEVSSNHVLIYLDK	TEVSSNHVLIYLDK TEVSSNHVLIYLDK	9	11	27	3	5
A2M	Alpha-2-macroglobulin	A2MG_HUMAN	50Step_Domain_p1000.0_to_1050.0	1000	1050	50.0 AA STEP	50	5	4	5	8	12	-0.1	1	5	10	AIGYLNTGYQR HYDGSYSTFGER AIGYLNTGYQR HYDGSYSTFGER NQGNTWLTAFVLK AIGYLNTGYQR HYDGSYSTFGER	AIGYLNTGYQR HYDGSYSTFGER NQGNTWLTAFVLK AIGYLNTGYQR HYDGSYSTFGER	7	6	7	3	4
A2M	Alpha-2-macroglobulin	A2MG_HUMAN	50Step_Domain_p650.0_to_700.0	650	700	50.0 AA STEP	50	7	11	7	14	3	0	1	8	8	DMYSFLEDMGLK DMYSFLEDMGLK DMYSFLEDMGLK	DMYSFLEDMGLK DMYSFLEDMGLK	10	19	10	5	1
A2M	Alpha-2-macroglobulin	A2MG_HUMAN	50Step_Domain_p550.0_to_600.0	550	600	50.0 AA STEP	50	11	33	9	3	12	0.2	0.645	18	8	AVDQSVLLMKPDAELSASSVYNLLPEK LLIYAVLPTGDVIGDSAK VDLSFSPSQSLPASHAHLR YDVENCLANK AVDQSVLLMKPDAELSASSVYNLLPEK LLIYAVLPTGDVIGDSAK VDLSFSPSQSLPASHAHLR YDVENCLANK LLIYAVLPTGDVIGDSAK YDVENCLANK	LLIYAVLPTGDVIGDSAK LLIYAVLPTGDVIGDSAK YDVENCLANK	15	55	13	1	4
A2M	Alpha-2-macroglobulin	A2MG_HUMAN	50Step_Domain_p1350.0_to_1400.0	1350	1400	50.0 AA STEP	50	7	3	2	14	0	-0.06	1	4	7	SASNMAIVDVK MVSGFIPLKPTVK SASNMAIVDVK MVSGFIPLKPTVK SASNMAIVDVK	MVSGFIPLKPTVK SASNMAIVDVK	9	5	3	5	0
A2M	Alpha-2-macroglobulin	A2MG_HUMAN	50Step_Domain_p1050.0_to_1100.0	1050	1100	50.0 AA STEP	50	4	3	3	5	9	-0.08	1	3	7	SSGSLLNNAIK AYIFIDEAHITQALIWLSQR GGVEDEVTLSAYITIALLEIPLTVTHPVVR SSGSLLNNAIK SSGSLLNNAIK	SSGSLLNNAIK SSGSLLNNAIK	5	5	4	2	3
A2M	Alpha-2-macroglobulin	A2MG_HUMAN	50Step_Domain_p500.0_to_550.0	500	550	50.0 AA STEP	50	8	19	7	5	6	0.1	1	11	6	GHFSISIPVK LLIYAVLPTGDVIGDSAK SDIAPVAR TGTHGLLVK GHFSISIPVK LLIYAVLPTGDVIGDSAK GHFSISIPVK LLIYAVLPTGDVIGDSAK	LLIYAVLPTGDVIGDSAK SDIAPVAR LLIYAVLPTGDVIGDSAK	11	32	10	2	2
A2M	Alpha-2-macroglobulin	A2MG_HUMAN	50Step_Domain_p600.0_to_650.0	600	650	50.0 AA STEP	50	9	14	3	5	6	0.06	1	9	6	AVDQSVLLMKPDAELSASSVYNLLPEK DLTGFPGPLNDQDNEDCINR AVDQSVLLMKPDAELSASSVYNLLPEK DLTGFPGPLNDQDNEDCINR DLTGFPGPLNDQDNEDCINR	DLTGFPGPLNDQDNEDCINR DLTGFPGPLNDQDNEDCINR	12	24	4	2	2
A2M	Alpha-2-macroglobulin	A2MG_HUMAN	50Step_Domain_p350.0_to_400.0	350	400	50.0 AA STEP	50	2	2	1	5	3	-0.04	1	2	4	QGIPFFGQVR QGIPFFGQVR QGIPFFGQVR	QGIPFFGQVR QGIPFFGQVR	3	4	2	2	1
A2M	Alpha-2-macroglobulin	A2MG_HUMAN	50Step_Domain_p1150.0_to_1200.0	1150	1200	50.0 AA STEP	50	1	4	1	0	6	-0.02	1	2	3	ALLAYAFALAGNQDK ALLAYAFALAGNQDK APVGHFYEPQAPSAEVEMTSYVLLAYLTAQPAPTSEDLTSATNIVK ALLAYAFALAGNQDK	SLNEEAVK	2	6	1	0	2
A2M	Alpha-2-macroglobulin	A2MG_HUMAN	50Step_Domain_p50.0_to_100.0	50	100	50.0 AA STEP	50	7	9	4	3	0	0.1	1	7	2	SLFTDLEAENDVLHCVAFAVPK SSSNEEVMFLTVQVK SLFTDLEAENDVLHCVAFAVPK SSSNEEVMFLTVQVK SLFTDLEAENDVLHCVAFAVPK SSSNEEVMFLTVQVK	SSSNEEVMFLTVQVK	9	15	6	1	0
ABI3BP	Target of Nesh-SH3	D3YTG3_HUMAN	50Step_Domain_p200.0_to_250.0	200	250	50.0 AA STEP	50	56	60	47	55	54	0	1	54	54	DNVEGGIWSK IQSTYDQDHTVPAYVPR LIPITIIK DNVEGGIWSK IQSTYDQDHTVPAYVPR LIPITIIK DNVEGGIWSK IQSTYDQDHTVPAYVPR LIPITIIK	DNVEGGIWSK IQSTYDQDHTVPAYVPR LIPITIIK DNVEGGIWSK IQSTYDQDHTVPAYVPR LIPITIIK	34	25	44	79	85
ABI3BP	Target of Nesh-SH3	D3YTG3_HUMAN	50Step_Domain_p1700.0_to_1750.0	1700	1750	50.0 AA STEP	50	45	44	48	30	38	0.24	0	46	34	FYNIGDQR IYLSDSLTGK TGQQLTSDQLPIK FYNIGDQR IYLSDSLTGK TGQQLTSDQLPIK FYNIGDQR IYLSDSLTGK TGQQLTSDQLPIK	FYNIGDQR IYLSDSLTGK TGQQLTSDQLPIK TGQQLTSDQLPIKEGYFR FYNIGDQR IYLSDSLTGK TGQQLTSDQLPIK	27	18	45	44	61
ABI3BP	Target of Nesh-SH3	D3YTG3_HUMAN	50Step_Domain_p1600.0_to_1650.0	1600	1650	50.0 AA STEP	50	26	19	27	37	28	-0.16	0	24	32	NPLGEGPVSNTVAFSTESADPR VSEPVSAGR NPLGEGPVSNTVAFSTESADPR NPLGEGPVSNTVAFSTESADPR VSEPVSAGR	NPLGEGPVSNTVAFSTESADPR VSEPVSAGR NPLGEGPVSNTVAFSTESADPR VSEPVSAGR	16	8	25	53	44
ABI3BP	Target of Nesh-SH3	D3YTG3_HUMAN	50Step_Domain_p50.0_to_100.0	50	100	50.0 AA STEP	50	40	48	39	22	26	0.36	0	42	24	FTEAIVDAEPK LEGLLLGYGSNVSPNQYFPLPAEGK FTEAIVDAEPK LEGLLLGYGSNVSPNQYFPLPAEGK FTEAIVDAEPK LEGLLLGYGSNVSPNQYFPLPAEGK	FTEAIVDAEPK LEGLLLGYGSNVSPNQYFPLPAEGK FTEAIVDAEPK LEGLLLGYGSNVSPNQYFPLPAEGK	24	20	36	32	42
ABI3BP	Target of Nesh-SH3	D3YTG3_HUMAN	50Step_Domain_p1650.0_to_1700.0	1650	1700	50.0 AA STEP	50	30	34	29	20	27	0.14	0.0036	31	24	DAIWTERPFNSDSYSECK FVGVQLCNSLR IYLSDSLTGK VSEPVSAGR FVGVQLCNSLR IYLSDSLTGK DAIWTERPFNSDSYSECK FVGVQLCNSLR IYLSDSLTGK VSEPVSAGR	DAIWTERPFNSDSYSECK FVGVQLCNSLR IYLSDSLTGK VSEPVSAGR FVGVQLCNSLR IYLSDSLTGK VSEPVSAGR	18	14	27	29	43
ABI3BP	Target of Nesh-SH3	D3YTG3_HUMAN	50Step_Domain_p1500.0_to_1550.0	1500	1550	50.0 AA STEP	50	2	0	8	15	20	-0.3	0	3	18	YIQKPDNSPCSITDSVK YIQKPDNSPCSITDSVK	ETDPLGKPR YIQKPDNSPCSITDSVK ETDPLGKPR YIQKPDNSPCSITDSVK	1	0	7	22	32
ABI3BP	Target of Nesh-SH3	D3YTG3_HUMAN	50Step_Domain_p250.0_to_300.0	250	300	50.0 AA STEP	50	17	17	15	11	13	0.08	0.594	16	12	LPASLMFEISDALK LPASLMFEISDALK LPASLMFEISDALK	LPASLMFEISDALK LPASLMFEISDALK	10	7	14	16	21
ABI3BP	Target of Nesh-SH3	D3YTG3_HUMAN	50Step_Domain_p1450.0_to_1500.0	1450	1500	50.0 AA STEP	50	2	0	2	12	11	-0.22	0	1	12	QPTVPASGEELENITDFSSSPTR QPTVPASGEELENITDFSSSPTR	ETDPLGKPR IETDIKQPTVPASGEELENITDFSSSPTR QPTVPASGEELENITDFSSSPTR ETDPLGKPR IETDIKQPTVPASGEELENITDFSSSPTR QPTVPASGEELENITDFSSSPTR	1	0	2	17	18
ABI3BP	Target of Nesh-SH3	D3YTG3_HUMAN	50Step_Domain_p150.0_to_200.0	150	200	50.0 AA STEP	50	12	17	9	11	10	0.06	1	13	10	DNVEGGIWSK DNVEGGIWSK DNVEGGIWSK	DNVEGGIWSK DNVEGGIWSK	7	7	8	16	16
ABI3BP	Target of Nesh-SH3	D3YTG3_HUMAN	50Step_Domain_p1000.0_to_1050.0	1000	1050	50.0 AA STEP	50	2	0	0	3	2	-0.02	1	1	2	LVPSTDLEPGTLR	LVPSTDLEPGTLR LVPSTDLEPGTLR	1	0	0	4	3
ABI3BP	Target of Nesh-SH3	D3YTG3_HUMAN	50Step_Domain_p750.0_to_800.0	750	800	50.0 AA STEP	50	2	0	2	3	1	-0.02	1	1	2	LVPATILEPVLR LVPATILEPVLR	LVPATILEPVLR LVPATILEPVLR	1	0	2	4	2
ABI3BP	Target of Nesh-SH3	D3YTG3_HUMAN	50Step_Domain_p800.0_to_850.0	800	850	50.0 AA STEP	50	2	0	2	3	1	-0.02	1	1	2	LVPATILEPVLR LVPATILEPVLR	LVPATILEPVLR LVPATILEPVLR	1	0	2	4	2
ABI3BP	Target of Nesh-SH3	D3YTG3_HUMAN	50Step_Domain_p1150.0_to_1200.0	1150	1200	50.0 AA STEP	50	2	0	1	2	2	-0.02	1	1	2	APLWPEEPK APLWPEEPK	APLWPEEPK APLWPEEPK	1	0	1	3	3
ABI3BP	Target of Nesh-SH3	D3YTG3_HUMAN	50Step_Domain_p450.0_to_500.0	450	500	50.0 AA STEP	50	0	0	2	1	1	0	1	1	1	ILDSIPPK	ILDSIPPK ILDSIPPK	0	0	2	2	2
ABI3BP	Target of Nesh-SH3	D3YTG3_HUMAN	50Step_Domain_p1750.0_to_1786.0	1750	1786	50.0 AA STEP	36	0	0	1	1	0	0	1	0	0	QEPVQFGEIGGHTQINYVQWYECGTTIPGK	TGQQLTSDQLPIKEGYFR	0	0	1	1	0
ACAN	Aggrecan core protein	PGCA_HUMAN	50Step_Domain_p50.0_to_100.0	50	100	50.0 AA STEP	50	179	147	195	120	125	1.04	0	174	122	EKEVVLLVATEGR EVVLLVATEGR VNSAYQDK VSKEKEVVLLVATEGR EKEVVLLVATEGR EVVLLVATEGR EKEVVLLVATEGR EVVLLVATEGR VNSAYQDK	EKEVVLLVATEGR EVVLLVATEGR VNSAYQDK EKEVVLLVATEGR EVVLLVATEGR VNSAYQDK	66	45	167	203	189
ACAN	Aggrecan core protein	PGCA_HUMAN	50Step_Domain_p100.0_to_150.0	100	150	50.0 AA STEP	50	71	98	52	75	69	0.04	1	74	72	CEVMHGIEDSEATLEVVVK VNSAYQDK VSLPNYPAIPSDATLEVQSLR CEVMHGIEDSEATLEVVVK VSLPNYPAIPSDATLEVQSLR CEVMHGIEDSEATLEVVVK VNSAYQDK VSLPNYPAIPSDATLEVQSLR	CEVMHGIEDSEATLEVVVK VNSAYQDK VSLPNYPAIPSDATLEVQSLR CEVMHGIEDSEATLEVVVK VNSAYQDK VSLPNYPAIPSDATLEVQSLR	26	30	45	127	104
ACAN	Aggrecan core protein	PGCA_HUMAN	50Step_Domain_p550.0_to_600.0	550	600	50.0 AA STEP	50	54	46	56	64	56	-0.16	1	52	60	LEGEVFFATR TPCVGDKDSSPGVR TYGVRPSTETYDVYCFVDR LEGEVFFATR LEGEVFFATR	LEGEVFFATR TPCVGDKDSSPGVR LEGEVFFATR TPCVGDKDSSPGVR	20	14	48	109	84
ACAN	Aggrecan core protein	PGCA_HUMAN	50Step_Domain_p500.0_to_550.0	500	550	50.0 AA STEP	50	14	0	6	27	34	-0.46	0	7	30	TGAVIASPEQLQAAYEAGYEQCDAGWLR TPCVGDKDSSPGVR TGAVIASPEQLQAAYEAGYEQCDAGWLR YSLTFEEAQQACLR	TGAVIASPEQLQAAYEAGYEQCDAGWLR TPCVGDKDSSPGVR YSLTFEEAQQACLR TGAVIASPEQLQAAYEAGYEQCDAGWLR TPCVGDKDSSPGVR YSLTFEEAQQACLR	5	0	5	46	51
ACAN	Aggrecan core protein	PGCA_HUMAN	50Step_Domain_p2450.0_to_2500.0	2450	2500	50.0 AA STEP	50	11	16	12	19	33	-0.26	0.0867	13	26	DRYEINSLVR YEINSLVR YQCTEGFVQR DRYEINSLVR YEINSLVR DRYEINSLVR YEINSLVR	DRYEINSLVR YEINSLVR YQCTEGFVQR DRYEINSLVR GTVACGEPPVVEHAR YEINSLVR YQCTEGFVQR	4	5	10	33	50
ACAN	Aggrecan core protein	PGCA_HUMAN	50Step_Domain_p2300.0_to_2350.0	2300	2350	50.0 AA STEP	50	16	10	26	22	20	-0.08	1	17	21	CREQQSHLSSIVTPEEQEFVNNNAQDYQWIGLNDR EQQSHLSSIVTPEEQEFVNNNAQDYQWIGLNDR ETWVDAER EQQSHLSSIVTPEEQEFVNNNAQDYQWIGLNDR HFPDRETWVDAER EQQSHLSSIVTPEEQEFVNNNAQDYQWIGLNDR ETWVDAER HFPDRETWVDAER	EQQSHLSSIVTPEEQEFVNNNAQDYQWIGLNDR ETWVDAER HFPDRETWVDAER EQQSHLSSIVTPEEQEFVNNNAQDYQWIGLNDR ETWVDAER	6	3	22	38	30
ACAN	Aggrecan core protein	PGCA_HUMAN	50Step_Domain_p450.0_to_500.0	450	500	50.0 AA STEP	50	0	0	1	15	19	-0.34	0.0051	0	17	YSLTFEEAQQACLR	YSLTFEEAQQACLR YSLTFEEAQQACLR	0	0	1	26	29
ACAN	Aggrecan core protein	PGCA_HUMAN	50Step_Domain_p250.0_to_300.0	250	300	50.0 AA STEP	50	27	23	12	18	15	0.1	1	21	16	FTFQEAANECR LATTGQLYLAWQAGMDMCSAGWLADR FTFQEAANECR FTFQEAANECR	FTFQEAANECR FTFQEAANECRR LATTGQLYLAWQAGMDMCSAGWLADR FTFQEAANECR LATTGQLYLAWQAGMDMCSAGWLADR	10	7	10	30	22
ACAN	Aggrecan core protein	PGCA_HUMAN	50Step_Domain_p2350.0_to_2400.0	2350	2400	50.0 AA STEP	50	8	7	7	8	9	-0.02	1	7	8	CREQQSHLSSIVTPEEQEFVNNNAQDYQWIGLNDR EQQSHLSSIVTPEEQEFVNNNAQDYQWIGLNDR EQQSHLSSIVTPEEQEFVNNNAQDYQWIGLNDR EQQSHLSSIVTPEEQEFVNNNAQDYQWIGLNDR	EQQSHLSSIVTPEEQEFVNNNAQDYQWIGLNDR EQQSHLSSIVTPEEQEFVNNNAQDYQWIGLNDR	3	2	6	14	14
ACAN	Aggrecan core protein	PGCA_HUMAN	50Step_Domain_p1550.0_to_1600.0	1550	1600	50.0 AA STEP	50	3	3	2	8	9	-0.1	1	3	8	EGLETSASGAEDLSGLPSGK EGLETSASGAEDLSGLPSGK EDLVGSASGDLDLGK EGLETSASGAEDLSGLPSGK	EDLVGSASGDLDLGK EGLETSASGAEDLSGLPSGK EDLVGSASGDLDLGK EGLETSASGAEDLSGLPSGK	1	1	2	13	14
ACAN	Aggrecan core protein	PGCA_HUMAN	50Step_Domain_p300.0_to_350.0	300	350	50.0 AA STEP	50	11	10	5	11	5	0.02	1	9	8	LATTGQLYLAWQAGMDMCSAGWLADR ARPNCGGNLLGVR ARPNCGGNLLGVR	ARPNCGGNLLGVR LATTGQLYLAWQAGMDMCSAGWLADR TVYVHANQTGYPDPSSR ARPNCGGNLLGVR LATTGQLYLAWQAGMDMCSAGWLADR TVYVHANQTGYPDPSSR	4	3	4	18	8
ACAN	Aggrecan core protein	PGCA_HUMAN	50Step_Domain_p1600.0_to_1650.0	1600	1650	50.0 AA STEP	50	0	0	1	7	8	-0.16	1	0	8	EDLVGSASGDLDLGK	EDLVGSASGDLDLGK EDLVGSASGDLDLGK	0	0	1	12	12
ACAN	Aggrecan core protein	PGCA_HUMAN	50Step_Domain_p150.0_to_200.0	150	200	50.0 AA STEP	50	8	7	13	5	7	0.06	1	9	6	ACLQNSAIIATPEQLQAAYEDGFHQCDAGWLADQTVR AISTRYTLDFDR CEVMHGIEDSEATLEVVVK AISTRYTLDFDR CEVMHGIEDSEATLEVVVK ACLQNSAIIATPEQLQAAYEDGFHQCDAGWLADQTVR AISTRYTLDFDR CEVMHGIEDSEATLEVVVK	AISTRYTLDFDR CEVMHGIEDSEATLEVVVK ACLQNSAIIATPEQLQAAYEDGFHQCDAGWLADQTVR AISTRYTLDFDR CEVMHGIEDSEATLEVVVK	3	2	11	8	11
ACAN	Aggrecan core protein	PGCA_HUMAN	50Step_Domain_p2100.0_to_2150.0	2100	2150	50.0 AA STEP	50	0	10	3	5	6	-0.04	1	4	6	EDSGSPDLSETTSAFHEANLER EDSGSPDLSETTSAFHEANLER	EDSGSPDLSETTSAFHEANLER EDSGSPDLSETTSAFHEANLER	0	3	3	8	9
ACAN	Aggrecan core protein	PGCA_HUMAN	50Step_Domain_p600.0_to_650.0	600	650	50.0 AA STEP	50	3	7	1	2	5	0	1	4	4	CYAGWLADGSLR CYAGWLADGSLR CYAGWLADGSLR	CYAGWLADGSLR CYAGWLADGSLR	1	2	1	4	8
ACAN	Aggrecan core protein	PGCA_HUMAN	50Step_Domain_p650.0_to_700.0	650	700	50.0 AA STEP	50	3	0	2	4	3	-0.04	1	2	4	TVYLYPNQTGLPDPLSR TVYLYPNQTGLPDPLSR	TVYLYPNQTGLPDPLSR TVYLYPNQTGLPDPLSR	1	0	2	6	5
ACAN	Aggrecan core protein	PGCA_HUMAN	50Step_Domain_p200.0_to_250.0	200	250	50.0 AA STEP	50	5	0	2	0	1	0.04	1	2	0	ACLQNSAIIATPEQLQAAYEDGFHQCDAGWLADQTVR EGCYGDKDEFPGVR ACLQNSAIIATPEQLQAAYEDGFHQCDAGWLADQTVR	ACLQNSAIIATPEQLQAAYEDGFHQCDAGWLADQTVR	2	0	2	0	1
AEBP1	Adipocyte enhancer-binding protein 1	AEBP1_HUMAN	50Step_Domain_p750.0_to_800.0	750	800	50.0 AA STEP	50	31	35	34	28	23	0.14	0	33	26	AIIAWMEK GEDEDEVSEAQETPDHAIFR LVSYPYDMAR NPFVLGANLNGGER TPTQEQLLAAAMAAAR AIIAWMEK GEDEDEVSEAQETPDHAIFR LVSYPYDMAR TPTQEQLLAAAMAAAR AIIAWMEK GEDEDEVSEAQETPDHAIFR LVSYPYDMAR NPFVLGANLNGGER TPTQEQLLAAAMAAAR	AIIAWMEK GEDEDEVSEAQETPDHAIFR LVSYPYDMAR NPFVLGANLNGGER TPTQEQLLAAAMAAAR AIIAWMEK GEDEDEVSEAQETPDHAIFR LVSYPYDMAR NPFVLGANLNGGER TPTQEQLLAAAMAAAR	23	22	48	20	14
AEBP1	Adipocyte enhancer-binding protein 1	AEBP1_HUMAN	50Step_Domain_p600.0_to_650.0	600	650	50.0 AA STEP	50	12	16	14	18	27	-0.16	0	14	22	IYAMEISDNPGEHELGEPEFR YTAGIHGNEVLGR IYAMEISDNPGEHELGEPEFR YTAGIHGNEVLGR IYAMEISDNPGEHELGEPEFR YTAGIHGNEVLGR	IYAMEISDNPGEHELGEPEFR YTAGIHGNEVLGR IYAMEISDNPGEHELGEPEFR YTAGIHGNEVLGR	9	10	19	13	16
AEBP1	Adipocyte enhancer-binding protein 1	AEBP1_HUMAN	50Step_Domain_p550.0_to_600.0	550	600	50.0 AA STEP	50	8	10	9	13	18	-0.14	0.0096	9	16	IYAMEISDNPGEHELGEPEFR IYAMEISDNPGEHELGEPEFR IYAMEISDNPGEHELGEPEFR VVNEECPTITR	IYAMEISDNPGEHELGEPEFR IYAMEISDNPGEHELGEPEFR	6	6	13	9	11
AEBP1	Adipocyte enhancer-binding protein 1	AEBP1_HUMAN	50Step_Domain_p800.0_to_850.0	800	850	50.0 AA STEP	50	22	13	24	11	7	0.22	0	20	9	GEDEDEVSEAQETPDHAIFR GEDEDEVSEAQETPDHAIFR GEDEDEVSEAQETPDHAIFR	GEDEDEVSEAQETPDHAIFR GEDEDEVSEAQETPDHAIFR	16	8	33	8	4
AEBP1	Adipocyte enhancer-binding protein 1	AEBP1_HUMAN	50Step_Domain_p700.0_to_750.0	700	750	50.0 AA STEP	50	11	13	9	6	10	0.06	1	11	8	AIIAWMEK VPNNNLPIPER YLSPDATVSTEVR AIIAWMEK VPNNNLPIPER YLSPDATVSTEVR AIIAWMEK VPNNNLPIPER YLSPDATVSTEVR	AIIAWMEK VPNNNLPIPER YLSPDATVSTEVR AIIAWMEK VPNNNLPIPER YLSPDATVSTEVR	8	8	13	4	6
AEBP1	Adipocyte enhancer-binding protein 1	AEBP1_HUMAN	50Step_Domain_p850.0_to_900.0	850	900	50.0 AA STEP	50	9	8	11	8	5	0.06	1	9	6	EALLTFMEQVHR FPHESELPR EALLTFMEQVHR FPHESELPR EALLTFMEQVHR FPHESELPR	FPHESELPR FPHESELPR	7	5	15	6	3
AEBP1	Adipocyte enhancer-binding protein 1	AEBP1_HUMAN	50Step_Domain_p350.0_to_400.0	350	400	50.0 AA STEP	50	9	5	2	6	5	-0.02	1	5	6	GEELEEEWTPTEK KGEELEEEWTPTEK GEELEEEWTPTEK KGEELEEEWTPTEK KGEELEEEWTPTEK	GEELEEEWTPTEK KGEELEEEWTPTEK GEELEEEWTPTEK KGEELEEEWTPTEK	7	3	3	4	3
AEBP1	Adipocyte enhancer-binding protein 1	AEBP1_HUMAN	50Step_Domain_p500.0_to_550.0	500	550	50.0 AA STEP	50	5	8	3	8	3	-0.02	1	5	6	DTPVLSELPEPVVAR DTPVLSELPEPVVAR DTPVLSELPEPVVAR	DTPVLSELPEPVVAR DTPVLSELPEPVVAR	4	5	4	6	2
AEBP1	Adipocyte enhancer-binding protein 1	AEBP1_HUMAN	50Step_Domain_p400.0_to_450.0	400	450	50.0 AA STEP	50	1	2	6	3	5	-0.02	1	3	4	LNMQTGATEDDYYDGAWCAEDDAR TQWIEVDTR LNMQTGATEDDYYDGAWCAEDDAR TQWIEVDTR	TQWIEVDTR LNMQTGATEDDYYDGAWCAEDDAR TQWIEVDTR	1	1	9	2	3
AEBP1	Adipocyte enhancer-binding protein 1	AEBP1_HUMAN	50Step_Domain_p950.0_to_1000.0	950	1000	50.0 AA STEP	50	1	2	4	4	3	-0.04	1	2	4	ILNPGEYR ILNPGEYR ILNPGEYR VTAHAEGYTPSAK	ILNPGEYR VTAHAEGYTPSAK ILNPGEYR	1	1	6	3	2
AEBP1	Adipocyte enhancer-binding protein 1	AEBP1_HUMAN	50Step_Domain_p900.0_to_950.0	900	950	50.0 AA STEP	50	5	8	9	3	3	0.08	0.396	7	3	EALLTFMEQVHR ILNPGEYR EALLTFMEQVHR ILNPGEYR EALLTFMEQVHR ILNPGEYR	ILNPGEYR ILNPGEYR	4	5	12	2	2
AEBP1	Adipocyte enhancer-binding protein 1	AEBP1_HUMAN	50Step_Domain_p250.0_to_300.0	250	300	50.0 AA STEP	50	1	0	0	3	3	-0.06	1	0	3	EDYEDFEYIR	APAPAPEER EDYEDFEYIR APAPAPEER VWPEPPEEK	1	0	0	2	2
AEBP1	Adipocyte enhancer-binding protein 1	AEBP1_HUMAN	50Step_Domain_p450.0_to_500.0	450	500	50.0 AA STEP	50	3	2	2	1	2	0	1	2	2	FTGVITQGR FTGVITQGR FTGVITQGR	FTGVITQGR FTGVITQGR	2	1	3	1	1
AEBP1	Adipocyte enhancer-binding protein 1	AEBP1_HUMAN	50Step_Domain_p200.0_to_250.0	200	250	50.0 AA STEP	50	1	0	0	1	0	0	1	0	0	EDYEDFEYIR	EDYEDFEYIR	1	0	0	1	0
AGT	Angiotensinogen	ANGT_HUMAN	50Step_Domain_p50.0_to_100.0	50	100	50.0 AA STEP	50	6	4	4	8	10	-0.08	0.004	5	9	ALQDQLVLVAAK DPTFIPAPIQAK ALQDQLVLVAAK DPTFIPAPIQAK ALQDQLVLVAAK DPTFIPAPIQAK	ALQDQLVLVAAK DPTFIPAPIQAK ALQDQLVLVAAK DPTFIPAPIQAK	6	6	3	5	5
AGT	Angiotensinogen	ANGT_HUMAN	50Step_Domain_p200.0_to_250.0	200	250	50.0 AA STEP	50	6	9	11	8	2	0.08	0.022	9	5	QPFVQGLALYTPVVLPR SLDFTELDVAAEK ADSQAQLLLSTVVGVFTAPGLHLK QPFVQGLALYTPVVLPR SLDFTELDVAAEK QPFVQGLALYTPVVLPR SLDFTELDVAAEK	QPFVQGLALYTPVVLPR SLDFTELDVAAEK SLDFTELDVAAEK	6	14	8	5	1
AGT	Angiotensinogen	ANGT_HUMAN	50Step_Domain_p150.0_to_200.0	150	200	50.0 AA STEP	50	4	5	3	2	4	0.02	1	4	3	LQAILGVPWK VLSALQAVQGLLVAQGR ADSQAQLLLSTVVGVFTAPGLHLK LQAILGVPWK VLSALQAVQGLLVAQGR VLSALQAVQGLLVAQGR	VLSALQAVQGLLVAQGR VLSALQAVQGLLVAQGR	4	7	2	1	2
AGT	Angiotensinogen	ANGT_HUMAN	50Step_Domain_p250.0_to_300.0	250	300	50.0 AA STEP	50	2	1	0	0	2	0	1	1	1	FMQAVTGWK FMQAVTGWK	FMQAVTGWK	2	2	0	0	1
AHNAK	Neuroblast differentiation-associated protein AHNAK	AHNK_HUMAN	50Step_Domain_p4650.0_to_4700.0	4650	4700	50.0 AA STEP	50	0	1	0	2	2	-0.04	0	0	2	VDVDVPDVNIEGPDAK	ADIDVSGPK GEGPDVDVNLPK GEGPDVDVNLPK VDVDVPDVNIEGPDAK	0	1	0	4	2
AHNAK	Neuroblast differentiation-associated protein AHNAK	AHNK_HUMAN	50Step_Domain_p750.0_to_800.0	750	800	50.0 AA STEP	50	0	1	0	1	2	-0.04	0.0118	0	2	AEGPEVDVNLPK IDVTAPDVSIEEPEGK	AEGPEVDVNLPK IDVTAPDVSIEEPEGK ADVDISGPK IDVTAPDVSIEEPEGK	0	2	0	2	2
AHNAK	Neuroblast differentiation-associated protein AHNAK	AHNK_HUMAN	50Step_Domain_p900.0_to_950.0	900	950	50.0 AA STEP	50	0	1	0	1	1	-0.02	1	0	1	AEGPEVDVNLPK	AEGPEVDVNLPK ADVDISGPK	0	1	0	1	1
AHNAK	Neuroblast differentiation-associated protein AHNAK	AHNK_HUMAN	50Step_Domain_p2050.0_to_2100.0	2050	2100	50.0 AA STEP	50	0	1	0	1	1	-0.02	1	0	1	AEGPEVDVNLPK	AEGPEVDVNLPK VDVEVPDVSLEGPEGK VDVEVPDVSLEGPEGK	0	1	0	2	1
AHNAK	Neuroblast differentiation-associated protein AHNAK	AHNK_HUMAN	50Step_Domain_p2100.0_to_2150.0	2100	2150	50.0 AA STEP	50	0	1	0	1	1	-0.02	1	0	1	GDVDVSLPK	GDVDVSLPK ISMPDVDLHLK GDVDVSLPK	0	1	0	2	1
AHNAK	Neuroblast differentiation-associated protein AHNAK	AHNK_HUMAN	50Step_Domain_p2500.0_to_2550.0	2500	2550	50.0 AA STEP	50	0	1	0	1	1	-0.02	1	0	1	AEGPEVDVNLPK	AEGPEVDVNLPK VDIEGPDVNIEGPEGK ADVDISGPK	0	1	0	2	1
AHNAK	Neuroblast differentiation-associated protein AHNAK	AHNK_HUMAN	50Step_Domain_p2550.0_to_2600.0	2550	2600	50.0 AA STEP	50	0	1	0	1	1	-0.02	1	0	1	GDVDVSLPK ISMPDFDLHLK	GDVDVSLPK VDIEGPDVNIEGPEGK GDVDVSLPK	0	2	0	2	1
AHNAK	Neuroblast differentiation-associated protein AHNAK	AHNK_HUMAN	50Step_Domain_p2600.0_to_2650.0	2600	2650	50.0 AA STEP	50	0	1	0	1	1	-0.02	1	0	1	GDVDVSLPK	GDVDVSLPK GDVDVSLPK	0	1	0	1	1
AHNAK	Neuroblast differentiation-associated protein AHNAK	AHNK_HUMAN	50Step_Domain_p2700.0_to_2750.0	2700	2750	50.0 AA STEP	50	0	1	0	1	1	-0.02	1	0	1	GDVDVSLPK	GDVDVSLPK GDVDVSLPK	0	1	0	1	1
AHNAK	Neuroblast differentiation-associated protein AHNAK	AHNK_HUMAN	50Step_Domain_p3150.0_to_3200.0	3150	3200	50.0 AA STEP	50	0	1	0	1	1	-0.02	1	0	1	VDVDVPDVNIEGPDAK	GEGPEVDVNLPK VDVDVPDVNIEGPDAK	0	1	0	1	1
AHNAK	Neuroblast differentiation-associated protein AHNAK	AHNK_HUMAN	50Step_Domain_p3750.0_to_3800.0	3750	3800	50.0 AA STEP	50	0	1	0	1	1	-0.02	1	0	1	GDVDVSLPK	GDVDVSLPK GDVDVSLPK	0	1	0	1	1
AHNAK	Neuroblast differentiation-associated protein AHNAK	AHNK_HUMAN	50Step_Domain_p3800.0_to_3850.0	3800	3850	50.0 AA STEP	50	0	1	0	1	1	-0.02	1	0	1	VDIDVPDVNIEGPEGK	GEGPDVDVNLPK GEGPDVDVNLPK	0	1	0	2	1
AHNAK	Neuroblast differentiation-associated protein AHNAK	AHNK_HUMAN	50Step_Domain_p3950.0_to_4000.0	3950	4000	50.0 AA STEP	50	0	1	0	1	1	-0.02	1	0	1	VDVDVPDVNIEGPDAK	GEGPEVDVNLPK VDVDVPDVNIEGPDAK	0	1	0	1	1
AHNAK	Neuroblast differentiation-associated protein AHNAK	AHNK_HUMAN	50Step_Domain_p4000.0_to_4050.0	4000	4050	50.0 AA STEP	50	0	1	0	1	1	-0.02	1	0	1	GDVDVSLPK ISMPDFDLHLK	GDVDVSLPK GDVDVSLPK	0	2	0	1	1
AHNAK	Neuroblast differentiation-associated protein AHNAK	AHNK_HUMAN	50Step_Domain_p4100.0_to_4150.0	4100	4150	50.0 AA STEP	50	0	1	0	1	1	-0.02	1	0	1	GDVDVSLPK	GDVDVSLPK VDIDTPDIDIHGPEGK GDVDVSLPK	0	1	0	2	1
AHNAK	Neuroblast differentiation-associated protein AHNAK	AHNK_HUMAN	50Step_Domain_p4150.0_to_4200.0	4150	4200	50.0 AA STEP	50	0	1	0	1	1	-0.02	1	0	1	GDVDVSLPK	GDVDVSLPK GDVDVSLPK	0	1	0	1	1
AHNAK	Neuroblast differentiation-associated protein AHNAK	AHNK_HUMAN	50Step_Domain_p4250.0_to_4300.0	4250	4300	50.0 AA STEP	50	0	1	0	1	1	-0.02	1	0	1	GDVDVSLPK ISMPDFDLHLK	GDVDVSLPK GDVDVSLPK	0	2	0	1	1
AHNAK	Neuroblast differentiation-associated protein AHNAK	AHNK_HUMAN	50Step_Domain_p4400.0_to_4450.0	4400	4450	50.0 AA STEP	50	0	1	0	1	1	-0.02	1	0	1	GDVDVSLPK	GDVDVSLPK GDVDVSLPK	0	1	0	1	1
AHNAK	Neuroblast differentiation-associated protein AHNAK	AHNK_HUMAN	50Step_Domain_p4450.0_to_4500.0	4450	4500	50.0 AA STEP	50	0	1	0	1	1	-0.02	1	0	1	GDVDVSLPK ISMPDFDLHLK	GDVDVSLPK GDVDVSLPK	0	2	0	1	1
AHNAK	Neuroblast differentiation-associated protein AHNAK	AHNK_HUMAN	50Step_Domain_p850.0_to_900.0	850	900	50.0 AA STEP	50	0	1	0	1	0	0	1	0	0	AEGPEVDVNLPK	AEGPEVDVNLPK	0	1	0	1	0
AHNAK	Neuroblast differentiation-associated protein AHNAK	AHNK_HUMAN	50Step_Domain_p1700.0_to_1750.0	1700	1750	50.0 AA STEP	50	0	1	0	1	0	0	1	0	0	AEGPEVDVNLPK	AEGPEVDVNLPK	0	1	0	1	0
AHNAK	Neuroblast differentiation-associated protein AHNAK	AHNK_HUMAN	50Step_Domain_p2900.0_to_2950.0	2900	2950	50.0 AA STEP	50	0	1	0	1	0	0	1	0	0	AEGPEVDVNLPK VDVEGPDVNIEGPEGK	AEGPEVDVNLPK	0	2	0	1	0
AHNAK	Neuroblast differentiation-associated protein AHNAK	AHNK_HUMAN	50Step_Domain_p3200.0_to_3250.0	3200	3250	50.0 AA STEP	50	0	1	0	0	1	0	1	0	0	VDVDVPDVNIEGPDAK	VDVDVPDVNIEGPDAK	0	1	0	0	1
AHNAK	Neuroblast differentiation-associated protein AHNAK	AHNK_HUMAN	50Step_Domain_p3600.0_to_3650.0	3600	3650	50.0 AA STEP	50	0	1	0	0	1	0	1	0	0	VDVDVPDVNIEGPDAK	VDVDVPDVNIEGPDAK	0	1	0	0	1
AHNAK	Neuroblast differentiation-associated protein AHNAK	AHNK_HUMAN	50Step_Domain_p3650.0_to_3700.0	3650	3700	50.0 AA STEP	50	0	1	0	0	1	0	1	0	0	VDVDVPDVNIEGPDAK	VDVDVPDVNIEGPDAK	0	1	0	0	1
AHNAK	Neuroblast differentiation-associated protein AHNAK	AHNK_HUMAN	50Step_Domain_p4700.0_to_4750.0	4700	4750	50.0 AA STEP	50	0	1	0	0	1	0	1	0	0	VDVDVPDVNIEGPDAK	VDVDVPDVNIEGPDAK	0	1	0	0	1
AHNAK	Neuroblast differentiation-associated protein AHNAK	AHNK_HUMAN	50Step_Domain_p4800.0_to_4850.0	4800	4850	50.0 AA STEP	50	0	1	0	1	0	0	1	0	0	VDVDIPDVNIEGPDAK	ADIDVSGPK	0	1	0	2	0
ANG	Angiogenin	ANGI_HUMAN	50Step_Domain_p50.0_to_100.0	50	100	50.0 AA STEP	50	6	2	4	10	17	-0.2	0.0153	4	14	DINTFIHGNK DINTFIHGNK DINTFIHGNK	DINTFIHGNK SSFQVTTCK DINTFIHGNK	2	2	7	12	23
ANG	Angiogenin	ANGI_HUMAN	50Step_Domain_p100.0_to_147.0	100	147	50.0 AA STEP	47	14	13	13	9	2	0.148936	0.0429	13	6	NVVVACENGLPVHLDQSIFR NVVVACENGLPVHLDQSIFR NVVVACENGLPVHLDQSIFR	NVVVACENGLPVHLDQSIFR SSFQVTTCK NVVVACENGLPVHLDQSIFR	5	11	22	11	3
ANG	Angiogenin	ANGI_HUMAN	50Step_Domain_p0_to_50	0	50	50.0 AA STEP	50	0	5	2	2	0	0.02	1	2	1	YTHFLTQHYDAKPQGR YTHFLTQHYDAKPQGR YTHFLTQHYDAKPQGR	YTHFLTQHYDAKPQGR YTHFLTQHYDAKPQGR	0	4	3	3	0
ANGPTL2	Angiopoietin-related protein 2	ANGL2_HUMAN	50Step_Domain_p350.0_to_400.0	350	400	50.0 AA STEP	50	13	7	10	9	8	0.04	1	10	8	LEPESEYYK LLVTMEDWSGR VFAEYASFR LEPESEYYK LLVTMEDWSGR VFAEYASFR LEPESEYYK LLVTMEDWSGR VFAEYASFR	LLVTMEDWSGR VFAEYASFR LEPESEYYK VFAEYASFR	15	10	12	5	4
ANGPTL2	Angiopoietin-related protein 2	ANGL2_HUMAN	50Step_Domain_p300.0_to_350.0	300	350	50.0 AA STEP	50	4	3	3	9	6	-0.1	0.069	3	8	HDPGGWTVIQR LDGSVNFFR HDPGGWTVIQR LDGSVNFFR HDPGGWTVIQR LDGSVNFFR	HDPGGWTVIQR LDGSVNFFR HDPGGWTVIQR LDGSVNFFR	4	4	4	5	3
ANGPTL2	Angiopoietin-related protein 2	ANGL2_HUMAN	50Step_Domain_p450.0_to_493.0	450	493	50.0 AA STEP	43	3	2	5	4	6	-0.0465116	1	3	5	YQDGVYWAEFR YQDGVYWAEFR YQDGVYWAEFR	YQDGVYWAEFR YQDGVYWAEFR	3	3	6	2	3
ANGPTL2	Angiopoietin-related protein 2	ANGL2_HUMAN	50Step_Domain_p50.0_to_100.0	50	100	50.0 AA STEP	50	1	1	2	2	2	-0.02	1	1	2	EPEVLLENR EPEVLLENR QELELLNNELLK EPEVLLENR QELELLNNELLK	QELELLNNELLK QELELLNNELLK	1	2	2	1	1
ANGPTL2	Angiopoietin-related protein 2	ANGL2_HUMAN	50Step_Domain_p100.0_to_150.0	100	150	50.0 AA STEP	50	3	11	4	0	2	0.1	0.016	6	1	DNALELSQLENR QIETLQQLVEVDGGIVSEVK RDNALELSQLENR DNALELSQLENR QIETLQQLVEVDGGIVSEVK RDNALELSQLENR VTQLYMQLLHEIIR DNALELSQLENR QIETLQQLVEVDGGIVSEVK RDNALELSQLENR	DNALELSQLENR	3	17	5	0	1
ANGPTL2	Angiopoietin-related protein 2	ANGL2_HUMAN	50Step_Domain_p150.0_to_200.0	150	200	50.0 AA STEP	50	2	1	2	0	2	0.02	1	2	1	DNALELSQLENR RDNALELSQLENR DNALELSQLENR RDNALELSQLENR DNALELSQLENR RDNALELSQLENR	DNALELSQLENR	2	2	2	0	1
ANXA5	Annexin A5	ANXA5_HUMAN	50Step_Domain_p100.0_to_150.0	100	150	50.0 AA STEP	50	8	5	5	6	10	-0.04	1	6	8	QVYEEEYGSSLEDDVVGDTSGYYQR VLTEIIASR QVYEEEYGSSLEDDVVGDTSGYYQR VLTEIIASR QVYEEEYGSSLEDDVVGDTSGYYQR VLTEIIASR	QVYEEEYGSSLEDDVVGDTSGYYQR VLTEIIASR QVYEEEYGSSLEDDVVGDTSGYYQR VLTEIIASR	4	4	4	9	8
ANXA5	Annexin A5	ANXA5_HUMAN	50Step_Domain_p0_to_50	0	50	50.0 AA STEP	50	4	9	8	10	5	-0.02	1	7	8	GTVTDFPGFDER GLGTDEESILTLLTSR GTVTDFPGFDER GLGTDEESILTLLTSR GTVTDFPGFDER	GLGTDEESILTLLTSR GTVTDFPGFDER GLGTDEESILTLLTSR GTVTDFPGFDER	2	7	7	15	4
ANXA5	Annexin A5	ANXA5_HUMAN	50Step_Domain_p150.0_to_200.0	150	200	50.0 AA STEP	50	6	4	6	6	7	-0.02	1	5	6	FITIFGTR QVYEEEYGSSLEDDVVGDTSGYYQR FITIFGTR QVYEEEYGSSLEDDVVGDTSGYYQR DPDAGIDEAQVEQDAQALFQAGELK FITIFGTR QVYEEEYGSSLEDDVVGDTSGYYQR	DPDAGIDEAQVEQDAQALFQAGELK FITIFGTR QVYEEEYGSSLEDDVVGDTSGYYQR DPDAGIDEAQVEQDAQALFQAGELK FITIFGTR QVYEEEYGSSLEDDVVGDTSGYYQR	3	3	5	9	5
ANXA5	Annexin A5	ANXA5_HUMAN	50Step_Domain_p250.0_to_300.0	250	300	50.0 AA STEP	50	6	8	8	3	7	0.04	0.9877	7	5	SEIDLFNIR SIPAYLAETLYYAMK SEIDLFNIR SIPAYLAETLYYAMK SEIDLFNIR SIPAYLAETLYYAMK	NFATSLYSMIK SEIDLFNIR SEIDLFNIR SIPAYLAETLYYAMK	3	6	7	5	5
ANXA5	Annexin A5	ANXA5_HUMAN	50Step_Domain_p50.0_to_100.0	50	100	50.0 AA STEP	50	2	1	2	4	3	-0.04	1	2	4	QEISAAFK LYDAYELK LYDAYELK QEISAAFK	LYDAYELK QEISAAFK LYDAYELK QEISAAFK	1	1	2	6	2
ANXA5	Annexin A5	ANXA5_HUMAN	50Step_Domain_p200.0_to_250.0	200	250	50.0 AA STEP	50	8	9	9	2	4	0.12	0.0091	9	3	ETSGNLEQLLLAVVK FITIFGTR SIPAYLAETLYYAMK YMTISGFQIEETIDR ETSGNLEQLLLAVVK FITIFGTR SIPAYLAETLYYAMK ETSGNLEQLLLAVVK FITIFGTR SIPAYLAETLYYAMK	FITIFGTR YMTISGFQIEETIDR FITIFGTR SIPAYLAETLYYAMK	4	7	8	3	3
APOA1	Apolipoprotein A-I	APOA1_HUMAN	50Step_Domain_p50.0_to_100.0	50	100	50.0 AA STEP	50	241	247	212	343	0	1.22	1	233	172	DLATVYVDVLKDSGR DSGRDYVSQFEGSALGK DYVSQFEGSALGK EQLGPVTQEFWDNLEK EQLGPVTQEFWDNLEKETEGLR LLDNWDSVTSTFSK LREQLGPVTQEFWDNLEK DLATVYVDVLKDSGR DLATVYVDVLKDSGRDYVSQFEGSALGK DSGRDYVSQFEGSALGK DYVSQFEGSALGK DYVSQFEGSALGKQLNLK EQLGPVTQEFWDNLEK EQLGPVTQEFWDNLEKETEGLR EQLGPVTQEFWDNLEKETEGLRQEMSK LLDNWDSVTSTFSK LLDNWDSVTSTFSKLR LREQLGPVTQEFWDNLEK LREQLGPVTQEFWDNLEKETEGLR QLNLKLLDNWDSVTSTFSK VKDLATVYVDVLKDSGR…	DYVSQFEGSALGK LLDNWDSVTSTFSK	277	494	63	2	0
APOA1	Apolipoprotein A-I	APOA1_HUMAN	50Step_Domain_p250.0_to_267.0	250	267	50.0 AA STEP	17	35	55	67	171	0	-2	1	52	86	VSFLSALEEYTK VSFLSALEEYTK VSFLSALEEYTKK VSFLSALEEYTK	VSFLSALEEYTK	40	109	20	1	0
APOE	Apolipoprotein E	APOE_HUMAN	50Step_Domain_p250.0_to_300.0	250	300	50.0 AA STEP	50	13	19	12	27	24	-0.22	0.0007	15	26	LEEQAQQIR LQAEAFQAR QWAGLVEK SWFEPLVEDMQR DRLDEVKEQVAEVR LEEQAQQIR LQAEAFQAR QWAGLVEK SWFEPLVEDMQR LQAEAFQAR QWAGLVEK SWFEPLVEDMQR	LEEQAQQIR LQAEAFQAR QWAGLVEK LEEQAQQIR SWFEPLVEDMQR	16	35	6	4	3
APOE	Apolipoprotein E	APOE_HUMAN	50Step_Domain_p100.0_to_150.0	100	150	50.0 AA STEP	50	13	14	14	14	8	0.06	1	14	11	GEVQAMLGQSTEELR SELEEQLTPVAEETR GEVQAMLGQSTEELR SELEEQLTPVAEETR GEVQAMLGQSTEELR SELEEQLTPVAEETR	GEVQAMLGQSTEELR SELEEQLTPVAEETR SELEEQLTPVAEETR	16	26	7	2	1
APOE	Apolipoprotein E	APOE_HUMAN	50Step_Domain_p150.0_to_200.0	150	200	50.0 AA STEP	50	12	11	10	14	8	0	1	11	11	GEVQAMLGQSTEELR LAVYQAGAR LGPLVEQGR GEVQAMLGQSTEELR LLRDADDLQK GEVQAMLGQSTEELR LGPLVEQGR	GEVQAMLGQSTEELR LGPLVEQGR LGPLVEQGR	15	20	5	2	1
APOE	Apolipoprotein E	APOE_HUMAN	50Step_Domain_p50.0_to_100.0	50	100	50.0 AA STEP	50	11	12	14	7	8	0.08	0.301	12	8	ALMDETMK SELEEQLTPVAEETR WVQTLSEQVQEELLSSQVTQELR ALMDETMKELK SELEEQLTPVAEETR WVQTLSEQVQEELLSSQVTQELR SELEEQLTPVAEETR WVQTLSEQVQEELLSSQVTQELR	SELEEQLTPVAEETR SELEEQLTPVAEETR	14	22	7	1	1
APOE	Apolipoprotein E	APOE_HUMAN	50Step_Domain_p200.0_to_250.0	200	250	50.0 AA STEP	50	7	4	8	7	8	-0.04	1	6	8	AATVGSLAGQPLQER LGPLVEQGR AATVGSLAGQPLQER DRLDEVKEQVAEVR AATVGSLAGQPLQER LGPLVEQGR	LGPLVEQGR LGPLVEQGR	9	8	4	1	1
APOE	Apolipoprotein E	APOE_HUMAN	50Step_Domain_p0_to_50	0	50	50.0 AA STEP	50	3	2	6	0	8	0	1	4	4	VEQAVETEPEPELR VEQAVETEPEPELR VEQAVETEPEPELR	VEQAVETEPEPELR	4	3	3	0	1
BGN	Biglycan	PGS1_HUMAN	50Step_Domain_p200.0_to_250.0	200	250	50.0 AA STEP	50	66	53	67	99	88	-0.64	0.0344	62	94	DLPETLNELHLDHNK IQAIELEDLLR NMNCIEMGGNPLENSGFEPGAFDGLK DLPETLNELHLDHNK IQAIELEDLLR NMNCIEMGGNPLENSGFEPGAFDGLK DLPETLNELHLDHNK IQAIELEDLLR NMNCIEMGGNPLENSGFEPGAFDGLK	DLPETLNELHLDHNK IQAIELEDLLR ISEAKLTGIPK NMNCIEMGGNPLENSGFEPGAFDGLK DLPETLNELHLDHNK IQAIELEDLLR NMNCIEMGGNPLENSGFEPGAFDGLK	29	30	91	154	119
BGN	Biglycan	PGS1_HUMAN	50Step_Domain_p250.0_to_300.0	250	300	50.0 AA STEP	50	36	30	23	53	65	-0.58	0.0584	30	59	IQAIELEDLLR LGLGHNQIR VPSGLPDLK IQAIELEDLLR VPSGLPDLK IQAIELEDLLR LGLGHNQIR VPSGLPDLK	ELHLDNNK IQAIELEDLLR LGLGHNQIR VPSGLPDLK ELHLDNNK IQAIELEDLLR LGLGHNQIR VPSGLPDLK	16	17	31	82	88
BGN	Biglycan	PGS1_HUMAN	50Step_Domain_p50.0_to_100.0	50	100	50.0 AA STEP	50	38	25	16	33	36	-0.16	1	26	34	EISPDTTLLDLQNNDISELR EISPDTTLLDLQNNDISELRK VVQCSDLGLK EISPDTTLLDLQNNDISELR EISPDTTLLDLQNNDISELRK EISPDTTLLDLQNNDISELR EISPDTTLLDLQNNDISELRK VVQCSDLGLK	EISPDTTLLDLQNNDISELR EISPDTTLLDLQNNDISELRK VVQCSDLGLK EISPDTTLLDLQNNDISELR EISPDTTLLDLQNNDISELRK VVQCSDLGLK	17	14	22	52	48
BGN	Biglycan	PGS1_HUMAN	50Step_Domain_p100.0_to_150.0	100	150	50.0 AA STEP	50	56	83	80	35	33	0.78	0.0056	73	34	EISPDTTLLDLQNNDISELR EISPDTTLLDLQNNDISELRK GLQHLYALVLVNNK NHLVEIPPNLPSSLVELR EISPDTTLLDLQNNDISELR EISPDTTLLDLQNNDISELRK GLQHLYALVLVNNK NHLVEIPPNLPSSLVELR EISPDTTLLDLQNNDISELR EISPDTTLLDLQNNDISELRK GLQHLYALVLVNNK NHLVEIPPNLPSSLVELR	EISPDTTLLDLQNNDISELR EISPDTTLLDLQNNDISELRK NHLVEIPPNLPSSLVELR EISPDTTLLDLQNNDISELR EISPDTTLLDLQNNDISELRK	25	47	109	55	45
BGN	Biglycan	PGS1_HUMAN	50Step_Domain_p150.0_to_200.0	150	200	50.0 AA STEP	50	27	77	76	35	24	0.6	0.044	60	30	NHLVEIPPNLPSSLVELR NMNCIEMGGNPLENSGFEPGAFDGLK NHLVEIPPNLPSSLVELR NMNCIEMGGNPLENSGFEPGAFDGLK NHLVEIPPNLPSSLVELR NMNCIEMGGNPLENSGFEPGAFDGLK	NHLVEIPPNLPSSLVELR NMNCIEMGGNPLENSGFEPGAFDGLK NMNCIEMGGNPLENSGFEPGAFDGLK	12	44	104	54	32
BGN	Biglycan	PGS1_HUMAN	50Step_Domain_p300.0_to_350.0	300	350	50.0 AA STEP	50	25	18	9	13	6	0.14	1	17	10	VGVNDFCPMGFGVK VGVNDFCPMGFGVK VGVNDFCPMGFGVK	AYYNGISLFNNPVPYWEVQPATFR VGVNDFCPMGFGVK VGVNDFCPMGFGVK	11	10	12	20	8
BGN	Biglycan	PGS1_HUMAN	50Step_Domain_p350.0_to_368.0	350	368	50.0 AA STEP	18	0	0	1	4	1	-0.111111	1	0	2	LAIQFGNYK	AYYNGISLFNNPVPYWEVQPATFR LAIQFGNYK LAIQFGNYK	0	0	2	6	1
C3	Complement C3	CO3_HUMAN	50Step_Domain_p250.0_to_300.0	250	300	50.0 AA STEP	50	24	35	41	113	105	-1.52	0	33	109	GLEVTITAR IPIEDGSGEVVLSR ISLPESLK RIPIEDGSGEVVLSR VEGTAFVIFGIQDGEQR GLEVTITAR IPIEDGSGEVVLSR ISLPESLK RIPIEDGSGEVVLSR VEGTAFVIFGIQDGEQR GLEVTITAR IPIEDGSGEVVLSR ISLPESLK RIPIEDGSGEVVLSR VEGTAFVIFGIQDGEQR	IPIEDGSGEVVLSR ISLPESLK IPIEDGSGEVVLSR ISLPESLK	47	65	26	3	2
C3	Complement C3	CO3_HUMAN	50Step_Domain_p300.0_to_350.0	300	350	50.0 AA STEP	50	20	22	19	75	53	-0.88	0	20	64	IPIEDGSGEVVLSR RIPIEDGSGEVVLSR SGIPIVTSPYQIHFTK VLLDGVQNPR IPIEDGSGEVVLSR RIPIEDGSGEVVLSR SGIPIVTSPYQIHFTK SLYVSATVILHSGSDMVQAER VLLDGVQNPR IPIEDGSGEVVLSR RIPIEDGSGEVVLSR VLLDGVQNPR	IPIEDGSGEVVLSR IPIEDGSGEVVLSR	39	41	12	2	1
C3	Complement C3	CO3_HUMAN	50Step_Domain_p200.0_to_250.0	200	250	50.0 AA STEP	50	15	18	30	38	53	-0.5	0.051	21	46	AYYENSPQQVFSTEFEVK EYVLPSFEVIVEPTEK FYYIYNEK GLEVTITAR QDSLSSQNQLGVLPLSWDIPELVNMGQWK AYYENSPQQVFSTEFEVK EYVLPSFEVIVEPTEK GLEVTITAR QDSLSSQNQLGVLPLSWDIPELVNMGQWK AYYENSPQQVFSTEFEVK EYVLPSFEVIVEPTEK FYYIYNEK GLEVTITAR	EYVLPSFEVIVEPTEK EYVLPSFEVIVEPTEK	29	34	19	1	1
C3	Complement C3	CO3_HUMAN	50Step_Domain_p150.0_to_200.0	150	200	50.0 AA STEP	50	9	7	11	38	53	-0.74	0	9	46	QDSLSSQNQLGVLPLSWDIPELVNMGQWK TVMVNIENPEGIPVK QDSLSSQNQLGVLPLSWDIPELVNMGQWK TVMVNIENPEGIPVK TVMVNIENPEGIPVK	TVMVNIENPEGIPVK TVMVNIENPEGIPVK	17	13	7	1	1
C3	Complement C3	CO3_HUMAN	50Step_Domain_p400.0_to_450.0	400	450	50.0 AA STEP	50	23	12	32	75	0	-0.32	1	22	38	KQELSEAEQATR QELSEAEQATR TMQALPYSTVGNSNNYLHLSVLR VPVAVQGEDTVQSLTQGDGVAK TMQALPYSTVGNSNNYLHLSVLR VPVAVQGEDTVQSLTQGDGVAK KQELSEAEQATR QELSEAEQATR VPVAVQGEDTVQSLTQGDGVAK	QELSEAEQATR VPVAVQGEDTVQSLTQGDGVAK	46	22	20	2	0
C3	Complement C3	CO3_HUMAN	50Step_Domain_p950.0_to_1000.0	950	1000	50.0 AA STEP	50	47	40	66	0	53	0.5	0.051	51	26	EDIPPADLSDQVPDTESETR ILLQGTPVAQMTEDAVDAER EDIPPADLSDQVPDTESETR ILLQGTPVAQMTEDAVDAER EDIPPADLSDQVPDTESETR ILLQGTPVAQMTEDAVDAER	EDIPPADLSDQVPDTESETR	93	74	42	0	1
C3	Complement C3	CO3_HUMAN	50Step_Domain_p350.0_to_400.0	350	400	50.0 AA STEP	50	20	14	19	38	0	-0.02	1	18	19	SGIPIVTSPYQIHFTK VPVAVQGEDTVQSLTQGDGVAK SGIPIVTSPYQIHFTK VPVAVQGEDTVQSLTQGDGVAK YFKPGMPFDLMVFVTNPDGSPAYR VPVAVQGEDTVQSLTQGDGVAK	VPVAVQGEDTVQSLTQGDGVAK	40	25	12	1	0
C4B	Complement C4-B	CO4B_HUMAN	50Step_Domain_p1050.0_to_1100.0	1050	1100	50.0 AA STEP	50	10	9	9	0	28	-0.1	1	9	14	ADGSYAAWLSR DHAVDLIQK LQETSNWLLSQQQADGSFQDLSPVIHR VLSLAQEQVGGSPEK ADGSYAAWLSR GSSTWLTAFVLK LQETSNWLLSQQQADGSFQDLSPVIHR VLSLAQEQVGGSPEK ADGSYAAWLSR VLSLAQEQVGGSPEK	ADGSYAAWLSR VLSLAQEQVGGSPEK	18	16	4	0	3
C4B	Complement C4-B	CO4B_HUMAN	50Step_Domain_p550.0_to_600.0	550	600	50.0 AA STEP	50	5	4	7	9	18	-0.18	0.714	5	14	LELSVDGAK LELSVDGAK LHLETDSLALVALGALDTALYAAGSK LELSVDGAK	LELSVDGAK LELSVDGAK	9	7	3	2	2
C4B	Complement C4-B	CO4B_HUMAN	50Step_Domain_p950.0_to_1000.0	950	1000	50.0 AA STEP	50	7	10	12	26	0	-0.06	1	10	13	EELVYELNPLDHR TLEIPGNSDPNMIPDGDFNSYVR VTASDPLDTLGSEGALSPGGVASLLR EELVYELNPLDHR EGAIHREELVYELNPLDHR TLEIPGNSDPNMIPDGDFNSYVR VTASDPLDTLGSEGALSPGGVASLLR VTASDPLDTLGSEGALSPGGVASLLR	EELVYELNPLDHR VTASDPLDTLGSEGALSPGGVASLLR	14	18	5	6	0
C4B	Complement C4-B	CO4B_HUMAN	50Step_Domain_p1000.0_to_1050.0	1000	1050	50.0 AA STEP	50	14	13	14	22	0	0.06	1	14	11	DHAVDLIQK GCGEQTMIYLAPTLAASR TEQWSTLPPETK VTASDPLDTLGSEGALSPGGVASLLR GCGEQTMIYLAPTLAASR TEQWSTLPPETK VTASDPLDTLGSEGALSPGGVASLLR TEQWSTLPPETK VTASDPLDTLGSEGALSPGGVASLLR	VTASDPLDTLGSEGALSPGGVASLLR	27	24	6	5	0
C4B	Complement C4-B	CO4B_HUMAN	50Step_Domain_p300.0_to_350.0	300	350	50.0 AA STEP	50	6	6	14	13	9	-0.04	1	9	11	AEFQDALEK LNMGITDLQGLR LVNGQSHISLSK AEFQDALEK LNMGITDLQGLR AEFQDALEK LNMGITDLQGLR	AEFQDALEK LNMGITDLQGLR AEFQDALEK	12	11	6	3	1
C4B	Complement C4-B	CO4B_HUMAN	50Step_Domain_p750.0_to_800.0	750	800	50.0 AA STEP	50	3	3	9	4	9	-0.02	1	5	6	ALEILQEEDLIDEDDIPVR SFFPENWLWR ALEILQEEDLIDEDDIPVR SFFPENWLWR ALEILQEEDLIDEDDIPVR SFFPENWLWR	ALEILQEEDLIDEDDIPVR ALEILQEEDLIDEDDIPVR	5	5	4	1	1
C4B	Complement C4-B	CO4B_HUMAN	50Step_Domain_p900.0_to_950.0	900	950	50.0 AA STEP	50	3	5	2	4	9	-0.06	1	3	6	EELVYELNPLDHR GSFEFPVGDAVSK EELVYELNPLDHR EGAIHREELVYELNPLDHR GSFEFPVGDAVSK GSFEFPVGDAVSK	EELVYELNPLDHR GSFEFPVGDAVSK	5	9	1	1	1
C4B	Complement C4-B	CO4B_HUMAN	50Step_Domain_p250.0_to_300.0	250	300	50.0 AA STEP	50	3	3	2	4	9	-0.06	1	3	6	FGLLDEDGK FGLLDEDGKK FGLLDEDGK FGLLDEDGKK FGLLDEDGK	FGLLDEDGK FGLLDEDGK	5	5	1	1	1
C4B	Complement C4-B	CO4B_HUMAN	50Step_Domain_p450.0_to_500.0	450	500	50.0 AA STEP	50	1	2	2	4	9	-0.08	1	2	6	VGDTLNLNLR VGDTLNLNLR VGDTLNLNLR	VGDTLNLNLR VGDTLNLNLR	2	3	1	1	1
C4B	Complement C4-B	CO4B_HUMAN	50Step_Domain_p1250.0_to_1300.0	1250	1300	50.0 AA STEP	50	5	9	9	9	0	0.08	1	8	4	AEMADQAAAWLTR AEMADQAAAWLTR AEMADQAAAWLTR	AEMADQAAAWLTR	9	16	4	2	0
C4B	Complement C4-B	CO4B_HUMAN	50Step_Domain_p350.0_to_400.0	350	400	50.0 AA STEP	50	3	3	2	9	0	-0.02	1	3	4	EMSGSPASGIPVK HLVPGAPFLLQALVR EMSGSPASGIPVK HLVPGAPFLLQALVR EMSGSPASGIPVK	EMSGSPASGIPVK	6	5	1	2	0
C4B	Complement C4-B	CO4B_HUMAN	50Step_Domain_p400.0_to_450.0	400	450	50.0 AA STEP	50	2	1	2	9	0	-0.04	1	2	4	EMSGSPASGIPVK EMSGSPASGIPVK EMSGSPASGIPVK	EMSGSPASGIPVK	4	2	1	2	0
C4B	Complement C4-B	CO4B_HUMAN	50Step_Domain_p200.0_to_250.0	200	250	50.0 AA STEP	50	1	6	0	4	0	0	1	2	2	YVLPNFEVK EVYMPSSIFQDDFVIPDISEPGTWK KYVLPNFEVK YVLPNFEVK	YVLPNFEVK	1	10	0	1	0
C4B	Complement C4-B	CO4B_HUMAN	50Step_Domain_p1600.0_to_1650.0	1600	1650	50.0 AA STEP	50	4	0	0	4	0	-0.02	1	1	2	GLQDEDGYR ITQVLHFTK VEYGFQVK	GLQDEDGYR	8	0	0	1	0
C4B	Complement C4-B	CO4B_HUMAN	50Step_Domain_p650.0_to_700.0	650	700	50.0 AA STEP	50	1	0	0	4	0	-0.04	1	0	2	LGQYASPTAK	LGQYASPTAK	1	0	0	1	0
CALR	Calreticulin	CALR_HUMAN	50Step_Domain_p200.0_to_250.0	200	250	50.0 AA STEP	50	0	2	0	1	1	0	1	1	1	IDDPTDSKPEDWDKPEHIPDPDAK IKDPDASKPEDWDER	IDNSQVESGSLEDDWDFLPPK IDNSQVESGSLEDDWDFLPPK	0	2	0	2	1
CALU	Calumenin	CALU_HUMAN	50Step_Domain_p250.0_to_300.0	250	300	50.0 AA STEP	50	0	0	2	4	3	-0.06	0.0161	1	4	DWILPSDYDHAEAEAR	DWILPSDYDHAEAEAR DWILPSDYDHAEAEAR	0	0	2	6	5
CALU	Calumenin	CALU_HUMAN	50Step_Domain_p150.0_to_200.0	150	200	50.0 AA STEP	50	0	0	3	1	2	-0.02	1	1	2	DIVVQETMEDIDK	DIVVQETMEDIDK DIVVQETMEDIDK MADKDGDLIATK	0	0	3	2	3
CALU	Calumenin	CALU_HUMAN	50Step_Domain_p200.0_to_250.0	200	250	50.0 AA STEP	50	0	0	3	1	1	0	1	1	1	DIVVQETMEDIDK	DIVVQETMEDIDK DIVVQETMEDIDK	0	0	3	2	1
CALU	Calumenin	CALU_HUMAN	50Step_Domain_p50.0_to_100.0	50	100	50.0 AA STEP	50	0	0	1	1	1	-0.02	1	0	1	IDGDKDGFVTVDELK	IDGDKDGFVTVDELK IDGDKDGFVTVDELK TFDQLTPEESK	0	0	1	2	2
CAPG	Macrophage-capping protein	CAPG_HUMAN	50Step_Domain_p200.0_to_250.0	200	250	50.0 AA STEP	50	1	1	0	2	1	-0.02	0.3122	1	2	EGNPEEDLTADK EGNPEEDLTADK	EGNPEEDLTADK EGNPEEDLTADK	1	2	0	3	1
CAPG	Macrophage-capping protein	CAPG_HUMAN	50Step_Domain_p250.0_to_300.0	250	300	50.0 AA STEP	50	1	0	0	1	1	-0.02	0.7147	0	1	VSDATGQMNLTK	VSDATGQMNLTK VSDATGQMNLTK	2	0	0	1	1
CAVIN1	Caveolae-associated protein 1	CAVN1_HUMAN	50Step_Domain_p50.0_to_100.0	50	100	50.0 AA STEP	50	0	0	7	4	4	-0.04	1	2	4	IIGAVDQIQLTQAQLEER QAEMEGAVQSIQGELSK	IIGAVDQIQLTQAQLEER QAEMEGAVQSIQGELSK IIGAVDQIQLTQAQLEER QAEMEGAVQSIQGELSK	0	0	2	6	8
CCDC80	Coiled-coil domain-containing protein 80	CCD80_HUMAN	50Step_Domain_p650.0_to_700.0	650	700	50.0 AA STEP	50	4	8	15	25	16	-0.22	0	9	20	IDHFQLDNEKPMR VVDDEDLVDQR IDHFQLDNEKPMR VVDDEDLVDQR VVDDEDLVDQR	VVDDEDLVDQR VVDDEDLVDQR	4	10	20	17	11
CCDC80	Coiled-coil domain-containing protein 80	CCD80_HUMAN	50Step_Domain_p250.0_to_300.0	250	300	50.0 AA STEP	50	12	13	10	10	13	0	1	12	12	ASGVEGQVVAEGNDGGGGAGRPSLGSEK LEAMYEVIDQGPIR ASGVEGQVVAEGNDGGGGAGRPSLGSEK LEAMYEVIDQGPIR ASGVEGQVVAEGNDGGGGAGRPSLGSEK LEAMYEVIDQGPIR	ASGVEGQVVAEGNDGGGGAGRPSLGSEK LEAMYEVIDQGPIR ASGVEGQVVAEGNDGGGGAGRPSLGSEK LEAMYEVIDQGPIR	14	16	13	7	9
CCDC80	Coiled-coil domain-containing protein 80	CCD80_HUMAN	50Step_Domain_p600.0_to_650.0	600	650	50.0 AA STEP	50	7	8	5	7	9	-0.02	1	7	8	LLLITAPK SVADLLGSFEGK LLLITAPK SVADLLGSFEGK LLLITAPK SVADLLGSFEGK	LLLITAPK SVADLLGSFEGK LLLITAPK SVADLLGSFEGK	8	10	7	5	6
CCDC80	Coiled-coil domain-containing protein 80	CCD80_HUMAN	50Step_Domain_p700.0_to_750.0	700	750	50.0 AA STEP	50	8	8	7	1	6	0.08	0.3116	8	4	QYYEVPITMK SVFDLIDTFQSR EYGMTYNDFFMVLTDVDLR QYYEVPITMK SVFDLIDTFQSR QYYEVPITMK SVFDLIDTFQSR	SVFDLIDTFQSR SVFDLIDTFQSR	9	10	9	1	4
CCDC80	Coiled-coil domain-containing protein 80	CCD80_HUMAN	50Step_Domain_p200.0_to_250.0	200	250	50.0 AA STEP	50	6	3	6	3	4	0.02	1	5	4	ITSEGQILEQPLDPSLIPK ITSEGQILEQPLDPSLIPK ITSEGQILEQPLDPSLIPK	ITSEGQILEQPLDPSLIPK ITSEGQILEQPLDPSLIPK	7	4	8	2	3
CCDC80	Coiled-coil domain-containing protein 80	CCD80_HUMAN	50Step_Domain_p750.0_to_800.0	750	800	50.0 AA STEP	50	4	3	2	3	3	0	1	3	3	QSLENFLSR QSLENFLSR QSLENFLSR	QSLENFLSR QSLENFLSR	4	4	3	2	2
CCDC80	Coiled-coil domain-containing protein 80	CCD80_HUMAN	50Step_Domain_p50.0_to_100.0	50	100	50.0 AA STEP	50	0	1	1	3	3	-0.04	1	1	3	STLEEPNLQPLQR STLEEPNLQPLQR	STLEEPNLQPLQR STLEEPNLQPLQR	0	1	1	2	2
CCDC80	Coiled-coil domain-containing protein 80	CCD80_HUMAN	50Step_Domain_p300.0_to_350.0	300	350	50.0 AA STEP	50	3	2	2	1	4	0	1	2	2	ASGVEGQVVAEGNDGGGGAGRPSLGSEK ASGVEGQVVAEGNDGGGGAGRPSLGSEK ASGVEGQVVAEGNDGGGGAGRPSLGSEK	ASGVEGQVVAEGNDGGGGAGRPSLGSEK ASGVEGQVVAEGNDGGGGAGRPSLGSEK	3	3	3	1	3
CCDC80	Coiled-coil domain-containing protein 80	CCD80_HUMAN	50Step_Domain_p100.0_to_150.0	100	150	50.0 AA STEP	50	2	1	0	1	1	0	1	1	1	FPSGSSSPNILASFAGK FPSGSSSPNILASFAGK	FPSGSSSPNILASFAGK FPSGSSSPNILASFAGK	2	1	0	1	1
CCDC80	Coiled-coil domain-containing protein 80	CCD80_HUMAN	50Step_Domain_p150.0_to_200.0	150	200	50.0 AA STEP	50	5	11	8	1	0	0.16	0	8	0	HIQQIVLFHQAGEEGGK VWVISAPHASEGYYR HIQQIVLFHQAGEEGGK VWVISAPHASEGYYR HIQQIVLFHQAGEEGGK VWVISAPHASEGYYR	VWVISAPHASEGYYR	6	14	10	1	0
CCDC80	Coiled-coil domain-containing protein 80	CCD80_HUMAN	50Step_Domain_p850.0_to_900.0	850	900	50.0 AA STEP	50	4	1	0	0	1	0.04	1	2	0	EDVPAHLVK NYFQVSPEYFSMLLVGK NYFQVSPEYFSMLLVGK	EDVPAHLVK	5	1	0	0	1
CCDC80	Coiled-coil domain-containing protein 80	CCD80_HUMAN	50Step_Domain_p500.0_to_550.0	500	550	50.0 AA STEP	50	0	1	2	1	0	0.02	1	1	0	ILSNEYEEK ILSNEYEEK	ILSNEYEEK	0	1	2	1	0
CCDC80	Coiled-coil domain-containing protein 80	CCD80_HUMAN	50Step_Domain_p450.0_to_500.0	450	500	50.0 AA STEP	50	0	0	1	0	1	0	1	0	0	DPNVVPGPPKPAK	DPNVVPGPPKPAK	0	0	1	0	1
CCDC80	Coiled-coil domain-containing protein 80	CCD80_HUMAN	50Step_Domain_p800.0_to_850.0	800	850	50.0 AA STEP	50	1	0	0	0	1	0	1	0	0	EDVPAHLVK	EDVPAHLVK	1	0	0	0	1
CCN2	CCN family member 2	CCN2_HUMAN	50Step_Domain_p150.0_to_200.0	150	200	50.0 AA STEP	50	1	0	0	2	1	-0.04	0.0091	0	2	LEDTFGPDPTMIR	DQTVVGPALAAYR LEDTFGPDPTMIR LEDTFGPDPTMIR	1	0	0	3	2
CCN2	CCN family member 2	CCN2_HUMAN	50Step_Domain_p250.0_to_300.0	250	300	50.0 AA STEP	50	1	0	0	1	1	-0.02	0.3248	0	1	TTTLPVEFK	TTTLPVEFK TTTLPVEFK	2	0	0	1	1
CCN2	CCN family member 2	CCN2_HUMAN	50Step_Domain_p300.0_to_349.0	300	349	50.0 AA STEP	49	1	0	0	1	1	-0.0204082	0.3248	0	1	TTTLPVEFK	TTTLPVEFK TTTLPVEFK	2	0	0	1	1
CD109	CD109 antigen	CD109_HUMAN	50Step_Domain_p550.0_to_600.0	550	600	50.0 AA STEP	50	4	14	10	6	10	0.02	1	9	8	ISVTQPDSIVGIVAVDK IPVQLVFK ISVTQPDSIVGIVAVDK IPVQLVFK ISVTQPDSIVGIVAVDK	IPVQLVFK ISVTQPDSIVGIVAVDK IPVQLVFK ISVTQPDSIVGIVAVDK	1	5	8	11	12
CD109	CD109 antigen	CD109_HUMAN	50Step_Domain_p1100.0_to_1150.0	1100	1150	50.0 AA STEP	50	8	3	9	8	6	0	1	7	7	AEQEGGMQFWVSSESK LSDSWQPR EALNMLTWR AEQEGGMQFWVSSESK EALNMLTWR	AEQEGGMQFWVSSESK EALNMLTWR LSDSWQPR AEQEGGMQFWVSSESK EALNMLTWR	2	1	7	14	8
CD109	CD109 antigen	CD109_HUMAN	50Step_Domain_p1200.0_to_1250.0	1200	1250	50.0 AA STEP	50	8	6	6	5	9	0	1	7	7	TNIQVTVTGPSSPSPVK ALSEFAALMNTER ALSEFAALMNTER TNIQVTVTGPSSPSPVK	ALSEFAALMNTER TNIQVTVTGPSSPSPVK ALSEFAALMNTER TNIQVTVTGPSSPSPVK	2	2	5	9	11
CD109	CD109 antigen	CD109_HUMAN	50Step_Domain_p450.0_to_500.0	450	500	50.0 AA STEP	50	12	11	6	6	7	0.08	1	10	6	ELSYMVVSR VGSPFELVVSGNK ELSYMVVSR VGSPFELVVSGNK ELSYMVVSR VGSPFELVVSGNK	ELSYMVVSR VGSPFELVVSGNK ELSYMVVSR VGSPFELVVSGNK	3	4	5	10	9
CD109	CD109 antigen	CD109_HUMAN	50Step_Domain_p400.0_to_450.0	400	450	50.0 AA STEP	50	4	8	6	6	6	0	1	6	6	IEFPILEDSSELQLK IEFPILEDSSELQLK IEFPILEDSSELQLK	IEFPILEDSSELQLK IEFPILEDSSELQLK	1	3	5	10	8
CD109	CD109 antigen	CD109_HUMAN	50Step_Domain_p100.0_to_150.0	100	150	50.0 AA STEP	50	0	6	8	9	3	-0.02	1	5	6	TLTLPSLPLNSADEIYELR ISVFIQTDK IVTLFSDFKPYK TLTLPSLPLNSADEIYELR	ISVFIQTDK TLTLPSLPLNSADEIYELR ISVFIQTDK TLTLPSLPLNSADEIYELR	0	2	6	15	4
CD109	CD109 antigen	CD109_HUMAN	50Step_Domain_p500.0_to_550.0	500	550	50.0 AA STEP	50	8	8	4	5	5	0.04	1	7	5	ELSYMVVSR ELSYMVVSR IPVQLVFK ELSYMVVSR IPVQLVFK	ELSYMVVSR GQLVAVGK IPVQLVFK ELSYMVVSR IPVQLVFK	2	3	3	9	6
CD109	CD109 antigen	CD109_HUMAN	50Step_Domain_p1150.0_to_1200.0	1150	1200	50.0 AA STEP	50	8	6	5	5	5	0.02	1	6	5	NSLGGFASTQDTTVALK ALSEFAALMNTER ALSEFAALMNTER NSLGGFASTQDTTVALK	ALSEFAALMNTER NSLGGFASTQDTTVALK ALSEFAALMNTER NSLGGFASTQDTTVALK	2	2	4	9	6
CD109	CD109 antigen	CD109_HUMAN	50Step_Domain_p50.0_to_100.0	50	100	50.0 AA STEP	50	0	6	1	8	1	-0.04	1	2	4	TLTLPSLPLNSADEIYELR TLTLPSLPLNSADEIYELR	TLTLPSLPLNSADEIYELR TLTLPSLPLNSADEIYELR	0	2	1	14	1
CD109	CD109 antigen	CD109_HUMAN	50Step_Domain_p350.0_to_400.0	350	400	50.0 AA STEP	50	12	11	4	3	4	0.1	0.0493	9	4	ADGNQLTLEER ADGNQLTLEER ADGNQLTLEER	ADGNQLTLEER NNVVITVTQR ADGNQLTLEER	3	4	3	5	5
CD109	CD109 antigen	CD109_HUMAN	50Step_Domain_p1350.0_to_1400.0	1350	1400	50.0 AA STEP	50	0	0	1	3	2	-0.04	1	0	2	VSNTQDASVSIVDYYEPR	VSNTQDASVSIVDYYEPR VSNTQDASVSIVDYYEPR	0	0	1	5	2
CD109	CD109 antigen	CD109_HUMAN	50Step_Domain_p850.0_to_900.0	850	900	50.0 AA STEP	50	4	0	1	2	2	0	1	2	2	SYSQSILLDLTDNR SYSQSILLDLTDNR	TLSFSFPPNTVTGSER TLSFSFPPNTVTGSER	1	0	1	4	2
CD109	CD109 antigen	CD109_HUMAN	50Step_Domain_p150.0_to_200.0	150	200	50.0 AA STEP	50	0	0	4	2	0	0	1	1	1	IVTLFSDFKPYK SNLIQQWLSQQSDLGVISK	SNLIQQWLSQQSDLGVISK	0	0	3	3	0
CDH1	Cadherin-1	CADH1_HUMAN	50Step_Domain_p50.0_to_100.0	50	100	50.0 AA STEP	50	7	8	8	8	8	0	0.4302	8	8	TAYFSLDTR VGTDGVITVK TAYFSLDTR VGTDGVITVK TAYFSLDTR VGTDGVITVK	TAYFSLDTR VGTDGVITVK TAYFSLDTR VGTDGVITVK	6	10	10	8	7
CFH	Complement factor H	CFAH_HUMAN	50Step_Domain_p50.0_to_100.0	50	100	50.0 AA STEP	50	8	6	17	28	15	-0.24	0	10	22	GEWVALNPLR NTEILTGSWSDQTYPEGTQAIYK GEWVALNPLR NTEILTGSWSDQTYPEGTQAIYK GEWVALNPLR NTEILTGSWSDQTYPEGTQAIYK	GEWVALNPLR NTEILTGSWSDQTYPEGTQAIYK GEWVALNPLR NTEILTGSWSDQTYPEGTQAIYK	14	9	4	6	6
CFH	Complement factor H	CFAH_HUMAN	50Step_Domain_p0_to_50	0	50	50.0 AA STEP	50	6	4	12	23	10	-0.18	0.01	7	16	NTEILTGSWSDQTYPEGTQAIYK NTEILTGSWSDQTYPEGTQAIYK NTEILTGSWSDQTYPEGTQAIYK	NTEILTGSWSDQTYPEGTQAIYK NTEILTGSWSDQTYPEGTQAIYK	10	6	3	5	4
CFH	Complement factor H	CFAH_HUMAN	50Step_Domain_p750.0_to_800.0	750	800	50.0 AA STEP	50	7	7	0	5	5	0	1	5	5	EGWIHTVCINGR SSNLIILEEHLK EGWIHTVCINGR KEFDHNSNIR SSNLIILEEHLK	SSNLIILEEHLK SSNLIILEEHLK	12	11	0	1	2
CFH	Complement factor H	CFAH_HUMAN	50Step_Domain_p1150.0_to_1200.0	1150	1200	50.0 AA STEP	50	3	3	8	0	10	0	1	5	5	EIMENYNIALR EIMENYNIALR EIMENYNIALR	EIMENYNIALR	5	4	2	0	4
CFH	Complement factor H	CFAH_HUMAN	50Step_Domain_p400.0_to_450.0	400	450	50.0 AA STEP	50	7	7	0	0	5	0.06	1	5	2	AQTTVTCMENGWSPTPR AQTTVTCMENGWSPTPR	AQTTVTCMENGWSPTPR	12	10	0	0	2
CFH	Complement factor H	CFAH_HUMAN	50Step_Domain_p550.0_to_600.0	550	600	50.0 AA STEP	50	3	3	4	5	0	0.02	1	3	2	IDVHLVPDR IDVHLVPDRK IDVHLVPDR IDVHLVPDRK IDVHLVPDR	IDVHLVPDR	6	5	1	1	0
CFH	Complement factor H	CFAH_HUMAN	50Step_Domain_p200.0_to_250.0	200	250	50.0 AA STEP	50	1	1	8	0	2	0.04	1	3	1	SPDVINGSPISQK SPDVINGSPISQK SPDVINGSPISQK	SPDVINGSPISQK	2	2	2	0	1
CFL1	Cofilin-1	COF1_HUMAN	50Step_Domain_p50.0_to_100.0	50	100	50.0 AA STEP	50	5	5	5	5	0	0.06	0.1256	5	2	EILVGDVGQTVDDPYATFVK YALYDATYETK EDLVFIFWAPESAPLK EILVGDVGQTVDDPYATFVK KEDLVFIFWAPESAPLK YALYDATYETK EILVGDVGQTVDDPYATFVK YALYDATYETK	EILVGDVGQTVDDPYATFVK YALYDATYETK	3	9	3	2	0
CHAD	Chondroadherin	CHAD_HUMAN	50Step_Domain_p250.0_to_300.0	250	300	50.0 AA STEP	50	30	69	49	107	98	-1.06	0.0016	49	102	FSDGAFLGVTTLK LNQLPSNFPFDSLETLALTNNPWK YLETLWLDNTNLEK FSDGAFLGVTTLK LNQLPSNFPFDSLETLALTNNPWK YLETLWLDNTNLEK FSDGAFLGVTTLK LNQLPSNFPFDSLETLALTNNPWK YLETLWLDNTNLEK	FSDGAFLGVTTLK LNQLPSNFPFDSLETLALTNNPWK YLETLWLDNTNLEK FSDGAFLGVTTLK LNQLPSNFPFDSLETLALTNNPWK YLETLWLDNTNLEK	23	24	41	177	141
CHAD	Chondroadherin	CHAD_HUMAN	50Step_Domain_p200.0_to_250.0	200	250	50.0 AA STEP	50	23	37	35	69	94	-1	0.0032	32	82	NQLSSYPSAALSK SIPDNAFQSFGR YLETLWLDNTNLEK NQLSSYPSAALSK SIPDNAFQSFGR YLETLWLDNTNLEK NQLSSYPSAALSK SIPDNAFQSFGR YLETLWLDNTNLEK	NQLSSYPSAALSK SIPDNAFQSFGR YLETLWLDNTNLEK NQLSSYPSAALSK SIPDNAFQSFGR YLETLWLDNTNLEK	18	13	29	114	134
CHAD	Chondroadherin	CHAD_HUMAN	50Step_Domain_p300.0_to_350.0	300	350	50.0 AA STEP	50	5	9	17	35	14	-0.28	1	10	24	LNQLPSNFPFDSLETLALTNNPWK LNQLPSNFPFDSLETLALTNNPWK LNQLPSNFPFDSLETLALTNNPWK	LNQLPSNFPFDSLETLALTNNPWK ASRPDATCASPAK LNQLPSNFPFDSLETLALTNNPWK	4	3	14	57	20
CHAD	Chondroadherin	CHAD_HUMAN	50Step_Domain_p50.0_to_100.0	50	100	50.0 AA STEP	50	6	31	23	21	12	0.08	1	20	16	NNFPVLAANSFR QLIYLYLSHNDIR NNFPVLAANSFR QLIYLYLSHNDIR NNFPVLAANSFR QLIYLYLSHNDIR	EVAAGAFR NNFPVLAANSFR QLIYLYLSHNDIR EVAAGAFR NNFPVLAANSFR	5	11	19	34	17
CHAD	Chondroadherin	CHAD_HUMAN	50Step_Domain_p150.0_to_200.0	150	200	50.0 AA STEP	50	9	26	11	8	22	0	1	15	15	AGAFQGAK WLYLSENALSSLQPGALDDVENLAK AGAFQGAK WLYLSENALSSLQPGALDDVENLAK AGAFQGAK WLYLSENALSSLQPGALDDVENLAK	AGAFQGAK WLYLSENALSSLQPGALDDVENLAK AGAFQGAK WLYLSENALSSLQPGALDDVENLAK	7	9	9	14	31
CHAD	Chondroadherin	CHAD_HUMAN	50Step_Domain_p100.0_to_150.0	100	150	50.0 AA STEP	50	119	54	84	1	5	1.66	0	86	3	AGAFDDLTELTYLYLDHNK QLIYLYLSHNDIR AGAFDDLTELTYLYLDHNK QLIYLYLSHNDIR AGAFDDLTELTYLYLDHNK QLIYLYLSHNDIR	QLIYLYLSHNDIR AGAFDDLTELTYLYLDHNK	92	19	70	1	7
CHADL	Chondroadherin-like protein	CHADL_HUMAN	50Step_Domain_p550.0_to_600.0	550	600	50.0 AA STEP	50	2	0	2	1	1	0	1	1	1	ITEVSLGALGPAR ITEVSLGALGPAR	ITEVSLGALGPAR ITEVSLGALGPAR	1	0	1	2	1
CHADL	Chondroadherin-like protein	CHADL_HUMAN	50Step_Domain_p500.0_to_550.0	500	550	50.0 AA STEP	50	3	0	0	1	1	0	1	1	1	LAPGDLGR LGYLYLER	FLQVPGAALR LGYLYLER FLQVPGAALR	2	0	0	2	1
CHADL	Chondroadherin-like protein	CHADL_HUMAN	50Step_Domain_p400.0_to_450.0	400	450	50.0 AA STEP	50	0	0	2	1	1	0	1	1	1	GFPSDTQLLDLR	GFPSDTQLLDLR GFPSDTQLLDLR	0	0	1	2	1
CHADL	Chondroadherin-like protein	CHADL_HUMAN	50Step_Domain_p250.0_to_300.0	250	300	50.0 AA STEP	50	0	0	2	0	1	0.02	1	1	0	ELLLDGGALQALGPR	GNQLDTLPPLQGPGQLR	0	0	1	0	1
CHADL	Chondroadherin-like protein	CHADL_HUMAN	50Step_Domain_p450.0_to_500.0	450	500	50.0 AA STEP	50	2	0	0	1	0	0.02	1	1	0	LGYLYLER	LGYLYLER	1	0	0	1	0
CHRD	Chordin	E7ESX1_HUMAN	50Step_Domain_p600.0_to_650.0	600	650	50.0 AA STEP	50	2	0	0	1	1	0	1	1	1	DLEPELLR	DLEPELLR DLEPELLR	1	0	0	1	2
CHRD	Chordin	CHRD_HUMAN	50Step_Domain_p600.0_to_650.0	600	650	50.0 AA STEP	50	2	0	0	1	1	0	1	1	1	DLEPELLR	DLEPELLR DLEPELLR	1	0	0	1	2
CHRD	Chordin	E7ESX1_HUMAN	50Step_Domain_p300.0_to_350.0	300	350	50.0 AA STEP	50	2	0	0	0	1	0.02	1	1	0	SGGLTQVPLR	SGGLTQVPLR	1	0	0	0	1
CHRD	Chordin	CHRD_HUMAN	50Step_Domain_p300.0_to_350.0	300	350	50.0 AA STEP	50	2	0	0	0	1	0.02	1	1	0	SGGLTQVPLR	SGGLTQVPLR	1	0	0	0	1
CHRDL2	Chordin-like protein 2	CRDL2_HUMAN	50Step_Domain_p300.0_to_350.0	300	350	50.0 AA STEP	50	0	3	0	4	4	-0.06	0.4122	1	4	VLVHTSVSPSPDNLR	ADPGHSEISSTR ADPGHSEISSTR VLVHTSVSPSPDNLR	0	2	0	6	8
CHRDL2	Chordin-like protein 2	CRDL2_HUMAN	50Step_Domain_p350.0_to_400.0	350	400	50.0 AA STEP	50	0	9	0	0	1	0.06	0.8316	3	0	FALEHEASDLVEIYLWK VLVHTSVSPSPDNLR	VLVHTSVSPSPDNLR	0	5	0	0	2
CILP	Cartilage intermediate layer protein 1	CILP1_HUMAN	50Step_Domain_p750.0_to_800.0	750	800	50.0 AA STEP	50	33	15	22	53	48	-0.54	0	23	50	FLPSEQIQGVVISVINLEPR TGFLSNPR FLPSEQIQGVVISVINLEPR FLPSEQIQGVVISVINLEPR TGFLSNPR	FDSVITGPNGACVPAFCDDQSPDAYSAYVLASLAGEELQAVESSPK FLPSEQIQGVVISVINLEPR TGFLSNPR FLPSEQIQGVVISVINLEPR TGFLSNPR	37	10	29	64	48
CILP	Cartilage intermediate layer protein 1	CILP1_HUMAN	50Step_Domain_p700.0_to_750.0	700	750	50.0 AA STEP	50	16	18	19	17	23	-0.04	1	18	20	LFNLDVPESR LWSLNPDTGLWEEEGDFK TFLVGNLEIR LFNLDVPESR LWSLNPDTGLWEEEGDFK TFLVGNLEIR LFNLDVPESR LWSLNPDTGLWEEEGDFK TFLVGNLEIR	LFNLDVPESR LWSLNPDTGLWEEEGDFK TFLVGNLEIR LFNLDVPESR LWSLNPDTGLWEEEGDFK TFLVGNLEIR	18	12	25	20	23
CILP	Cartilage intermediate layer protein 1	CILP1_HUMAN	50Step_Domain_p1100.0_to_1150.0	1100	1150	50.0 AA STEP	50	6	13	8	20	14	-0.16	0.0576	9	17	QSAFQYLQSTPAQSPAAGTVQGR SNVGVALTFNCVER QSAFQYLQSTPAQSPAAGTVQGR SNVGVALTFNCVER QSAFQYLQSTPAQSPAAGTVQGR SNVGVALTFNCVER	QSAFQYLQSTPAQSPAAGTVQGR SNVGVALTFNCVER CFDGTSDGSSR QSAFQYLQSTPAQSPAAGTVQGR SNVGVALTFNCVER	7	9	11	24	14
CILP	Cartilage intermediate layer protein 1	CILP1_HUMAN	50Step_Domain_p500.0_to_550.0	500	550	50.0 AA STEP	50	23	36	34	14	17	0.3	0	31	16	FGHVYMGNSR GTFTLHVPQDTER LVLTFVDR GTFTLHVPQDTER LVLTFVDR FGHVYMGNSR GTFTLHVPQDTER LVLTFVDR	GTFTLHVPQDTER LVLTFVDR GTFTLHVPQDTER LVLTFVDR VSAADNGEPMR	26	24	45	17	17
CILP	Cartilage intermediate layer protein 1	CILP1_HUMAN	50Step_Domain_p300.0_to_350.0	300	350	50.0 AA STEP	50	32	24	23	12	14	0.26	0	26	13	AETPYMVMNPETK AETPYMVMNPETK AETPYMVMNPETK	AETPYMVMNPETK AETPYMVMNPETK	36	16	31	14	14
CILP	Cartilage intermediate layer protein 1	CILP1_HUMAN	50Step_Domain_p950.0_to_1000.0	950	1000	50.0 AA STEP	50	5	9	8	13	11	-0.1	1	7	12	IVGPLEVNVR IVGPLEVNVR IVGPLEVNVR	IVGPLEVNVR IVGPLEVNVR	6	6	10	16	11
CILP	Cartilage intermediate layer protein 1	CILP1_HUMAN	50Step_Domain_p650.0_to_700.0	650	700	50.0 AA STEP	50	11	15	16	12	10	0.06	1	14	11	DEVTSEPLNAGK LWSLNPDTGLWEEEGDFK TYGMFSVDFR DEVTSEPLNAGK LWSLNPDTGLWEEEGDFK TYGMFSVDFR DEVTSEPLNAGK LWSLNPDTGLWEEEGDFK TYGMFSVDFR	DEVTSEPLNAGK LWSLNPDTGLWEEEGDFK TYGMFSVDFR DEVTSEPLNAGK LWSLNPDTGLWEEEGDFK	12	10	21	15	10
CILP	Cartilage intermediate layer protein 1	CILP1_HUMAN	50Step_Domain_p800.0_to_850.0	800	850	50.0 AA STEP	50	2	6	10	12	9	-0.08	1	6	10	FNPNAIGVPQPYLNK FNPNAIGVPQPYLNK FNPNAIGVPQPYLNK	FDSVITGPNGACVPAFCDDQSPDAYSAYVLASLAGEELQAVESSPK FNPNAIGVPQPYLNK FNPNAIGVPQPYLNK	2	4	13	14	9
CILP	Cartilage intermediate layer protein 1	CILP1_HUMAN	50Step_Domain_p850.0_to_900.0	850	900	50.0 AA STEP	50	2	6	10	9	10	-0.08	1	6	10	FNPNAIGVPQPYLNK FNPNAIGVPQPYLNK FNPNAIGVPQPYLNK	FNPNAIGVPQPYLNK FNPNAIGVPQPYLNK RTDHEDPR	2	4	13	11	10
CILP	Cartilage intermediate layer protein 1	CILP1_HUMAN	50Step_Domain_p900.0_to_950.0	900	950	50.0 AA STEP	50	5	1	7	9	7	-0.08	1	4	8	FYQIEGDR FYQIEGDR FYQIEGDR	ACEEAPPSAAHFR FYQIEGDR FYQIEGDR	6	1	9	11	7
CILP	Cartilage intermediate layer protein 1	CILP1_HUMAN	50Step_Domain_p250.0_to_300.0	250	300	50.0 AA STEP	50	6	7	5	3	9	0	1	6	6	FAPIVLTMPK LLTQTDSDGR FAPIVLTMPK FAPIVLTMPK LLTQTDSDGR	FAPIVLTMPK LLTQTDSDGR FAPIVLTMPK LLTQTDSDGR	7	5	6	4	9
CILP	Cartilage intermediate layer protein 1	CILP1_HUMAN	50Step_Domain_p50.0_to_100.0	50	100	50.0 AA STEP	50	15	16	15	5	4	0.22	0.0024	15	4	TTDWTPAGSTGQVVHGSPR TTDWTPAGSTGQVVHGSPR TTDWTPAGSTGQVVHGSPR	TTDWTPAGSTGQVVHGSPR TTDWTPAGSTGQVVHGSPR	17	11	20	6	4
CILP	Cartilage intermediate layer protein 1	CILP1_HUMAN	50Step_Domain_p100.0_to_150.0	100	150	50.0 AA STEP	50	15	16	15	5	4	0.22	0.0024	15	4	TTDWTPAGSTGQVVHGSPR TTDWTPAGSTGQVVHGSPR TTDWTPAGSTGQVVHGSPR	TTDWTPAGSTGQVVHGSPR TTDWTPAGSTGQVVHGSPR	17	11	20	6	4
CILP	Cartilage intermediate layer protein 1	CILP1_HUMAN	50Step_Domain_p600.0_to_650.0	600	650	50.0 AA STEP	50	6	9	6	4	4	0.06	1	7	4	ASVTFLDPR ASVTFLDPR ASVTFLDPR	ASVTFLDPR ASVTFLDPR	7	6	8	5	4
CILP	Cartilage intermediate layer protein 1	CILP1_HUMAN	50Step_Domain_p1150.0_to_1184.0	1150	1184	50.0 AA STEP	34	1	0	1	2	2	-0.0294118	1	1	2	VAQQPLIN VAQQPLIN	QGGVVASLR QGGVVASLR VAQQPLIN	1	0	1	2	2
CILP	Cartilage intermediate layer protein 1	CILP1_HUMAN	50Step_Domain_p450.0_to_500.0	450	500	50.0 AA STEP	50	1	1	1	0	2	0	1	1	1	EIQCSGYTLPTK EIQCSGYTLPTK EIQCSGYTLPTK	VSAADNGEPMR	1	1	1	0	2
CILP	Cartilage intermediate layer protein 1	CILP1_HUMAN	50Step_Domain_p1000.0_to_1050.0	1000	1050	50.0 AA STEP	50	1	0	0	1	1	-0.02	1	0	1	CSGMLYDQDR	CSGMLYDQDR CSGMLYDQDR	1	0	0	1	1
CILP	Cartilage intermediate layer protein 1	CILP1_HUMAN	50Step_Domain_p550.0_to_600.0	550	600	50.0 AA STEP	50	4	0	3	1	0	0.04	1	2	0	GSAVFHEIK GSAVFHEIK	GSAVFHEIK	4	0	4	1	0
CILP	Cartilage intermediate layer protein 1	CILP1_HUMAN	50Step_Domain_p400.0_to_450.0	400	450	50.0 AA STEP	50	0	1	1	0	1	0.02	1	1	0	VAQLIVIASDETPCNPVPESYLIR VAQLIVIASDETPCNPVPESYLIR	TCAGQQDNGIR	0	1	1	0	1
CILP2	Cartilage intermediate layer protein 2	K7EPJ4_HUMAN	50Step_Domain_p1100.0_to_1150.0	1100	1150	50.0 AA STEP	50	2	5	6	16	21	-0.28	0	4	18	ADAGTAVTFQCR LLESPATALGDIR LLESPATALGDIR LLESPATALGDIR	EMSEAAQAQAR LLESPATALGDIR ADAGTAVTFQCR EMSEAAQAQAR LLESPATALGDIR	2	4	6	19	19
CILP2	Cartilage intermediate layer protein 2	K7EPJ4_HUMAN	50Step_Domain_p900.0_to_950.0	900	950	50.0 AA STEP	50	6	8	15	21	5	-0.06	1	10	13	EGTPASWTGDLLAWWPNPQEFR YEYNVVPFR EGTPASWTGDLLAWWPNPQEFR YEYNVVPFR EGTPASWTGDLLAWWPNPQEFR YEYNVVPFR	EGTPASWTGDLLAWWPNPQEFR VEADKYEYNVVPFR YEYNVVPFR VEADKYEYNVVPFR YEYNVVPFR	5	6	15	26	5
CILP2	Cartilage intermediate layer protein 2	K7EPJ4_HUMAN	50Step_Domain_p750.0_to_800.0	750	800	50.0 AA STEP	50	6	6	5	23	2	-0.12	0.636	6	12	FTPSEQVEGVVVTLVNLEPAPGFSANPR FTPSEQVEGVVVTLVNLEPAPGFSANPR FTPSEQVEGVVVTLVNLEPAPGFSANPR	FTPSEQVEGVVVTLVNLEPAPGFSANPR FTPSEQVEGVVVTLVNLEPAPGFSANPR	5	5	5	28	2
CILP2	Cartilage intermediate layer protein 2	K7EPJ4_HUMAN	50Step_Domain_p950.0_to_1000.0	950	1000	50.0 AA STEP	50	11	5	8	7	12	-0.04	1	8	10	IQGPQEYMVR IQGPQEYMVR IQGPQEYMVR	IQGPQEYMVR IQGPQEYMVR	9	4	8	9	11
CILP2	Cartilage intermediate layer protein 2	K7EPJ4_HUMAN	50Step_Domain_p500.0_to_550.0	500	550	50.0 AA STEP	50	14	19	15	7	11	0.14	0.5544	16	9	ILLGQEPIGFTAYQGDFTIEVPPSTQR LVVTFVDPSGEFMDAVR ILLGQEPIGFTAYQGDFTIEVPPSTQR LVVTFVDPSGEFMDAVR ILLGQEPIGFTAYQGDFTIEVPPSTQR LVVTFVDPSGEFMDAVR	ILLGQEPIGFTAYQGDFTIEVPPSTQR LVVTFVDPSGEFMDAVR ILLGQEPIGFTAYQGDFTIEVPPSTQR LVVTFVDPSGEFMDAVR	11	15	15	8	10
CILP2	Cartilage intermediate layer protein 2	K7EPJ4_HUMAN	50Step_Domain_p450.0_to_500.0	450	500	50.0 AA STEP	50	14	9	9	7	10	0.06	1	11	8	ILLGQEPIGFTAYQGDFTIEVPPSTQR VVAADSGEPLR ILLGQEPIGFTAYQGDFTIEVPPSTQR VVAADSGEPLR ILLGQEPIGFTAYQGDFTIEVPPSTQR VVAADSGEPLR	ILLGQEPIGFTAYQGDFTIEVPPSTQR VVAADSGEPLR ILLGQEPIGFTAYQGDFTIEVPPSTQR VVAADSGEPLR	11	7	9	8	9
CILP2	Cartilage intermediate layer protein 2	K7EPJ4_HUMAN	50Step_Domain_p250.0_to_300.0	250	300	50.0 AA STEP	50	7	13	7	4	9	0.06	1	9	6	DQPGTVATSDAHGTFR LEKPYLVK DQPGTVATSDAHGTFR DQPGTVATSDAHGTFR	DQPGTVATSDAHGTFR DQPGTVATSDAHGTFR	6	10	7	5	8
CILP2	Cartilage intermediate layer protein 2	K7EPJ4_HUMAN	50Step_Domain_p200.0_to_250.0	200	250	50.0 AA STEP	50	6	13	7	4	9	0.06	1	9	6	DQPGTVATSDAHGTFR DQPGTVATSDAHGTFR DQPGTVATSDAHGTFR	DQPGTVATSDAHGTFR DQPGTVATSDAHGTFR	5	10	7	5	8
CILP2	Cartilage intermediate layer protein 2	K7EPJ4_HUMAN	50Step_Domain_p700.0_to_750.0	700	750	50.0 AA STEP	50	10	9	7	5	8	0.06	1	9	6	LFNLDVPER LWSLNPETGLWEEESGFR VFLVGNVEIR LWSLNPETGLWEEESGFR VFLVGNVEIR LFNLDVPER LWSLNPETGLWEEESGFR VFLVGNVEIR	LFNLDVPER LWSLNPETGLWEEESGFR VFLVGNVEIR LFNLDVPER VFLVGNVEIR	8	7	7	6	7
CILP2	Cartilage intermediate layer protein 2	K7EPJ4_HUMAN	50Step_Domain_p100.0_to_150.0	100	150	50.0 AA STEP	50	10	8	8	2	5	0.1	1	9	4	TTDWALPSAVGER TTDWALPSAVGER TTDWALPSAVGER	TTDWALPSAVGER TTDWALPSAVGER	8	6	8	3	5
CILP2	Cartilage intermediate layer protein 2	K7EPJ4_HUMAN	50Step_Domain_p1000.0_to_1050.0	1000	1050	50.0 AA STEP	50	6	9	2	2	3	0.08	1	6	2	HPPPVPAEDPAAFSMLAPLDPLGHNYGVYTVTDQSPR VAVNGLLR HPPPVPAEDPAAFSMLAPLDPLGHNYGVYTVTDQSPR VAVNGLLR	VAVNGLLR VAVNGLLR	5	7	2	3	3
CILP2	Cartilage intermediate layer protein 2	K7EPJ4_HUMAN	50Step_Domain_p650.0_to_700.0	650	700	50.0 AA STEP	50	6	13	6	2	1	0.12	0.636	8	2	APGSAEQLQVGPVAVR LWSLNPETGLWEEESGFR TYGMFSVDLR APGSAEQLQVGPVAVR LWSLNPETGLWEEESGFR TYGMFSVDLR APGSAEQLQVGPVAVR LWSLNPETGLWEEESGFR TYGMFSVDLR	APGSAEQLQVGPVAVR LWSLNPETGLWEEESGFR APGSAEQLQVGPVAVR	5	10	6	3	1
CILP2	Cartilage intermediate layer protein 2	K7EPJ4_HUMAN	50Step_Domain_p600.0_to_650.0	600	650	50.0 AA STEP	50	11	8	16	1	1	0.22	0.0168	12	1	DLTSAASAPSDLR FVDSDGELAPLR TYGMFSVDLR FVDSDGELAPLR TYGMFSVDLR DLTSAASAPSDLR FVDSDGELAPLR TYGMFSVDLR	FVDSDGELAPLR FVDSDGELAPLR	9	6	16	1	1
CILP2	Cartilage intermediate layer protein 2	K7EPJ4_HUMAN	50Step_Domain_p300.0_to_350.0	300	350	50.0 AA STEP	50	6	1	5	2	0	0.06	1	4	1	AHGYGAHLELR LEKPYLVK AHGYGAHLELR AHGYGAHLELR	AHGYGAHLELR	5	1	5	2	0
CILP2	Cartilage intermediate layer protein 2	K7EPJ4_HUMAN	50Step_Domain_p350.0_to_400.0	350	400	50.0 AA STEP	50	5	1	5	2	0	0.06	1	4	1	AHGYGAHLELR AHGYGAHLELR AHGYGAHLELR	AHGYGAHLELR AWNEAGAVR	4	1	5	3	0
CILP2	Cartilage intermediate layer protein 2	K7EPJ4_HUMAN	50Step_Domain_p1050.0_to_1100.0	1050	1100	50.0 AA STEP	50	5	9	0	0	1	0.1	1	5	0	ADAGTAVTFQCR HPPPVPAEDPAAFSMLAPLDPLGHNYGVYTVTDQSPR HPPPVPAEDPAAFSMLAPLDPLGHNYGVYTVTDQSPR	ADAGTAVTFQCR	4	7	0	0	1
CLEC3A	C-type lectin domain family 3 member A	CLC3A_HUMAN	50Step_Domain_p100.0_to_150.0	100	150	50.0 AA STEP	50	23	17	15	20	19	-0.04	1	18	20	GGILVIPR NSDEINALQDYGK GGILVIPR NSDEINALQDYGK SLPGVNDFWLGINDMVTEGK GGILVIPR NSDEINALQDYGK	FVDVNGIAISFLNWDR GGILVIPR NSDEINALQDYGK SLPGVNDFWLGINDMVTEGK FVDVNGIAISFLNWDR GGILVIPR NSDEINALQDYGK SLPGVNDFWLGINDMVTEGK	2	3	2	37	37
CLEC3A	C-type lectin domain family 3 member A	CLC3A_HUMAN	50Step_Domain_p50.0_to_100.0	50	100	50.0 AA STEP	50	12	12	15	7	7	0.12	0.0168	13	7	GGILVIPR GGILVIPR LWTEVNALK GGILVIPR LWTEVNALK	GGILVIPR LWTEVNALK GGILVIPR LWTEVNALK	1	2	2	14	13
CLSTN1	Calsyntenin-1	CSTN1_HUMAN	50Step_Domain_p550.0_to_600.0	550	600	50.0 AA STEP	50	0	2	0	2	1	-0.02	1	1	2	EGLDLQVLEDSGR	EGLDLQVLEDSGR GVQIQAHPSQLVLTLEGEDLGELDK EGLDLQVLEDSGR	0	2	0	3	1
CLSTN1	Calsyntenin-1	CSTN1_HUMAN	50Step_Domain_p350.0_to_400.0	350	400	50.0 AA STEP	50	0	0	3	1	1	0	1	1	1	IPDGVVSVSPK	IPDGVVSVSPK IPDGVVSVSPK	0	0	2	1	2
CLSTN1	Calsyntenin-1	CSTN1_HUMAN	50Step_Domain_p650.0_to_700.0	650	700	50.0 AA STEP	50	0	2	2	1	0	0.02	1	1	0	AASEFESSEGVFLFPELR AASEFESSEGVFLFPELR	AASEFESSEGVFLFPELR	0	2	1	2	0
CLU	Clusterin	CLUS_HUMAN	50Step_Domain_p150.0_to_200.0	150	200	50.0 AA STEP	50	163	173	191	127	117	1.08	0	176	122	ASSIIDELFQDR IDSLLENDR QQTHMLDVMQDHFSR ASSIIDELFQDR ASSIIDELFQDRFFTR IDSLLENDR QQTHMLDVMQDHFSR ASSIIDELFQDR IDSLLENDR QQTHMLDVMQDHFSR	ASSIIDELFQDR IDSLLENDR QQTHMLDVMQDHFSR ASSIIDELFQDR ASSIIDELFQDRFFTR IDSLLENDR QQTHMLDVMQDHFSR	206	181	294	58	58
CLU	Clusterin	CLUS_HUMAN	50Step_Domain_p300.0_to_350.0	300	350	50.0 AA STEP	50	74	64	80	125	109	-0.88	0.0009	73	117	EILSVDCSTNNPSQAK ELDESLQVAER RELDESLQVAER EILSVDCSTNNPSQAK ELDESLQVAER RELDESLQVAER EILSVDCSTNNPSQAK ELDESLQVAER RELDESLQVAER	EILSVDCSTNNPSQAK ELDESLQVAER RELDESLQVAER EILSVDCSTNNPSQAK ELDESLQVAER RELDESLQVAER	94	67	124	57	54
CLU	Clusterin	CLUS_HUMAN	50Step_Domain_p400.0_to_449.0	400	449	50.0 AA STEP	49	115	135	93	81	117	0.306122	1	114	99	FMETVAEK LFDSDPITVTVPVEVSR LFDSDPITVTVPVEVSRK VTTVASHTSDSDVPSGVTEVVVK FMETVAEK LFDSDPITVTVPVEVSR LFDSDPITVTVPVEVSRK VTTVASHTSDSDVPSGVTEVVVK FMETVAEK LFDSDPITVTVPVEVSR LFDSDPITVTVPVEVSRK VTTVASHTSDSDVPSGVTEVVVK	FMETVAEK LFDSDPITVTVPVEVSR VTTVASHTSDSDVPSGVTEVVVK FMETVAEK LFDSDPITVTVPVEVSR VTTVASHTSDSDVPSGVTEVVVK	145	142	144	37	58
CLU	Clusterin	CLUS_HUMAN	50Step_Domain_p350.0_to_400.0	350	400	50.0 AA STEP	50	59	61	67	53	87	-0.16	1	62	70	LANLTQGEDQYYLR VTTVASHTSDSDVPSGVTEVVVK LANLTQGEDQYYLR MLNTSSLLEQLNEQFNWVSR VTTVASHTSDSDVPSGVTEVVVK LANLTQGEDQYYLR VTTVASHTSDSDVPSGVTEVVVK	LANLTQGEDQYYLR VTTVASHTSDSDVPSGVTEVVVK LANLTQGEDQYYLR VTTVASHTSDSDVPSGVTEVVVK	75	64	103	24	43
CLU	Clusterin	CLUS_HUMAN	50Step_Domain_p50.0_to_100.0	50	100	50.0 AA STEP	50	36	21	27	57	52	-0.52	0.0927	28	54	EIQNAVNGVK KTLLSNLEEAK TLLSNLEEAK TLLSNLEEAKK TLLSNLEEAK TLLSNLEEAKK KTLLSNLEEAK TLLSNLEEAK TLLSNLEEAKK	EIQNAVNGVK TLLSNLEEAK TLLSNLEEAKK EDALNETR TLLSNLEEAK TLLSNLEEAKK	46	22	42	26	26
CLU	Clusterin	CLUS_HUMAN	50Step_Domain_p100.0_to_150.0	100	150	50.0 AA STEP	50	5	2	4	4	2	0.02	1	4	3	SGSGLVGR SGSGLVGR SGSGLVGR	SGSGLVGR SGSGLVGR	6	2	6	2	1
CLU	Clusterin	CLUS_HUMAN	50Step_Domain_p0_to_50	0	50	50.0 AA STEP	50	1	0	0	2	0	-0.02	1	0	1	EIQNAVNGVK	EIQNAVNGVK	1	0	0	1	0
COL11A1	Collagen; type XI; alpha 1; isoform CRA_c	D3DT72_HUMAN	50Step_Domain_p1750.0_to_1800.0	1750	1800	50.0 AA STEP	50	21	10	17	15	17	0	1	16	16	FLGSNDEEMSYDNNPFIK IDQVPIVDVMINDFGDQNQK TVIEINTPK FLGSNDEEMSYDNNPFIK FLGSNDEEMSYDNNPFIK IDQVPIVDVMINDFGDQNQK TVIEINTPK	FLGSNDEEMSYDNNPFIK IDQVPIVDVMINDFGDQNQK TVIEINTPK FLGSNDEEMSYDNNPFIK IDQVPIVDVMINDFGDQNQK TVIEINTPK	8	1	9	28	32
COL11A1	Collagen; type XI; alpha 1; isoform CRA_c	D3DT72_HUMAN	50Step_Domain_p1700.0_to_1750.0	1700	1750	50.0 AA STEP	50	5	10	8	9	8	0	1	8	8	FLGSNDEEMSYDNNPFIK FLGSNDEEMSYDNNPFIK FLGSNDEEMSYDNNPFIK	FLGSNDEEMSYDNNPFIK FLGSNDEEMSYDNNPFIK	2	1	4	17	15
COL11A1	Collagen; type XI; alpha 1; isoform CRA_c	D3DT72_HUMAN	50Step_Domain_p200.0_to_250.0	200	250	50.0 AA STEP	50	8	21	6	7	5	0.12	0.0111	12	6	AIVDTNGITVFGTR ILDEEVFEGDIQQFLITGDPK ILDEEVFEGDIQQFLITGDPK AAQAQEPQIDEK AIVDTNGITVFGTR	AAQAQEPQIDEK AIVDTNGITVFGTR ILDEEVFEGDIQQFLITGDPK AAQAQEPQIDEK AAQAQEPQIDEKK AIVDTNGITVFGTR ILDEEVFEGDIQQFLITGDPK	3	2	3	13	10
COL11A1	Collagen; type XI; alpha 1; isoform CRA_c	D3DT72_HUMAN	50Step_Domain_p1800.0_to_1818.0	1800	1818	50.0 AA STEP	18	8	0	6	5	7	-0.0555556	1	5	6	IDQVPIVDVMINDFGDQNQK IDQVPIVDVMINDFGDQNQK	IDQVPIVDVMINDFGDQNQK IDQVPIVDVMINDFGDQNQK	3	0	3	9	13
COL11A1	Collagen; type XI; alpha 1; isoform CRA_c	D3DT72_HUMAN	50Step_Domain_p1600.0_to_1650.0	1600	1650	50.0 AA STEP	50	0	0	6	6	3	-0.04	1	2	4	FPMGTQTNPAR	DLQLSHPDFPDGEYWIDPNQGCSGDSFK FPMGTQTNPAR DLQLSHPDFPDGEYWIDPNQGCSGDSFK FPMGTQTNPAR	0	0	3	11	6
COL11A1	Collagen; type XI; alpha 1; isoform CRA_c	D3DT72_HUMAN	50Step_Domain_p250.0_to_300.0	250	300	50.0 AA STEP	50	0	0	2	4	3	-0.06	1	1	4	AAQAQEPQIDEK	AAQAQEPQIDEK AAQAQEPQIDEK AAQAQEPQIDEKK	0	0	1	7	5
COL11A1	Collagen; type XI; alpha 1; isoform CRA_c	D3DT72_HUMAN	50Step_Domain_p150.0_to_200.0	150	200	50.0 AA STEP	50	3	0	4	2	2	0	1	2	2	AIVDTNGITVFGTR AIVDTNGITVFGTR	AIVDTNGITVFGTR AIVDTNGITVFGTR TVNIADGK	1	0	2	3	3
COL11A1	Collagen; type XI; alpha 1; isoform CRA_c	D3DT72_HUMAN	50Step_Domain_p0_to_50	0	50	50.0 AA STEP	50	3	0	2	1	3	0	1	2	2	ALDFHNSPEGISK ALDFHNSPEGISK	ALDFHNSPEGISK ALDFHNSPEGISK	1	0	1	2	6
COL11A1	Collagen; type XI; alpha 1; isoform CRA_c	D3DT72_HUMAN	50Step_Domain_p50.0_to_100.0	50	100	50.0 AA STEP	50	3	0	2	1	3	0	1	2	2	ALDFHNSPEGISK ALDFHNSPEGISK	ALDFHNSPEGISK ALDFHNSPEGISK	1	0	1	2	6
COL11A2	Collagen alpha-2(XI) chain	A0A140T9I7_HUMAN	50Step_Domain_p1550.0_to_1600.0	1550	1600	50.0 AA STEP	50	44	10	28	35	28	-0.1	1	27	32	GANEDELSPETSPYVK TPVLEQLPVLDASFSDLGAPPR TPVLEQLPVLDASFSDLGAPPR GANEDELSPETSPYVK TPVLEQLPVLDASFSDLGAPPR	GANEDELSPETSPYVK TPVLEQLPVLDASFSDLGAPPR GANEDELSPETSPYVK LRGANEDELSPETSPYVK TPVLEQLPVLDASFSDLGAPPR	5	1	6	66	34
COL11A2	Collagen alpha-2(XI) chain	A0A140T9I7_HUMAN	50Step_Domain_p1600.0_to_1623.0	1600	1623	50.0 AA STEP	23	27	10	19	31	16	-0.217391	1	19	24	TPVLEQLPVLDASFSDLGAPPR TPVLEQLPVLDASFSDLGAPPR TPVLEQLPVLDASFSDLGAPPR	TPVLEQLPVLDASFSDLGAPPR TPVLEQLPVLDASFSDLGAPPR	3	1	4	59	20
COL11A2	Collagen alpha-2(XI) chain	A0A140T9I7_HUMAN	50Step_Domain_p50.0_to_100.0	50	100	50.0 AA STEP	50	9	20	28	18	25	-0.06	1	19	22	DFSLLTVVR DFSLLTVVR DFSLLTVVR TRPGLQAPLLTLYSAQGVR	DFSLLTVVR FLYEDQTGRPQPPSQPVFR QLFPGGFPK TRPGLQAPLLTLYSAQGVR DFSLLTVVR FLYEDQTGRPQPPSQPVFR QLFPGGFPK	1	2	6	35	30
COL11A2	Collagen alpha-2(XI) chain	A0A140T9I7_HUMAN	50Step_Domain_p0_to_50	0	50	50.0 AA STEP	50	27	30	14	16	21	0.12	1	24	18	FPSLPDGVR FPSLPDGVR FPSLPDGVR	FPSLPDGVR QLFPGGFPK FPSLPDGVR QLFPGGFPK	3	3	3	30	25
COL12A1	Collagen alpha-1(XII) chain	COCA1_HUMAN	50Step_Domain_p1300.0_to_1350.0	1300	1350	50.0 AA STEP	50	2	0	4	5	5	-0.06	0.0434	2	5	MIATDPDDTHAYNVADFESLSR IGVLITDGK	DEGVELFAIGIK IGVLITDGK MIATDPDDTHAYNVADFESLSR DEGVELFAIGIK IGVLITDGK MIATDPDDTHAYNVADFESLSR NADEVELK	1	0	1	8	7
COL12A1	Collagen alpha-1(XII) chain	COCA1_HUMAN	50Step_Domain_p450.0_to_500.0	450	500	50.0 AA STEP	50	2	2	0	4	2	-0.04	1	1	3	DPHTEFTLK VEDIIEAINTFPYR	DPHTEFTLK SFEISPNR VEDIIEAINTFPYR DPHTEFTLK VEDIIEAINTFPYR	1	1	0	7	3
COL12A1	Collagen alpha-1(XII) chain	COCA1_HUMAN	50Step_Domain_p1350.0_to_1400.0	1350	1400	50.0 AA STEP	50	3	2	4	3	2	0.02	1	3	2	GPGDLEAPSNLVISER MIATDPDDTHAYNVADFESLSR GPGDLEAPSNLVISER GPGDLEAPSNLVISER	GPGDLEAPSNLVISER MIATDPDDTHAYNVADFESLSR GPGDLEAPSNLVISER MIATDPDDTHAYNVADFESLSR	2	1	1	6	3
COL12A1	Collagen alpha-1(XII) chain	COCA1_HUMAN	50Step_Domain_p1050.0_to_1100.0	1050	1100	50.0 AA STEP	50	3	0	0	2	3	-0.02	1	1	2	TSDPTMSSFR	LQPQTTYDITVLPIYK TSDPTMSSFR VPPTVTSTVLK LQPQTTYDITVLPIYK TSDPTMSSFR VPPTVTSTVLK	2	0	0	4	5
COL12A1	Collagen alpha-1(XII) chain	COCA1_HUMAN	50Step_Domain_p850.0_to_900.0	850	900	50.0 AA STEP	50	2	0	0	2	3	-0.02	1	1	2	QYLVTYTPVAGGETQEVTVR	GDTTNTVLQGLK QYLVTYTPVAGGETQEVTVR GDTTNTVLQGLK QYLVTYTPVAGGETQEVTVR	1	0	0	4	4
COL12A1	Collagen alpha-1(XII) chain	COCA1_HUMAN	50Step_Domain_p1900.0_to_1950.0	1900	1950	50.0 AA STEP	50	2	0	0	3	2	-0.02	1	1	2	NLQPDTSYTVTVVPVYTEGDGGR	LFYAPAAGGPEELVPIPGNTNYAILR NLQPDTSYTVTVVPVYTEGDGGR NLQPDTSYTVTVVPVYTEGDGGR	1	0	0	5	3
COL12A1	Collagen alpha-1(XII) chain	COCA1_HUMAN	50Step_Domain_p200.0_to_250.0	200	250	50.0 AA STEP	50	3	4	4	1	3	0.04	1	4	2	DELLAAIK VAIIITDGK DELLAAIK GGNTMTGDAIDYLVK DELLAAIK	DELLAAIK VAIIITDGK DELLAAIK GGNTMTGDAIDYLVK	2	2	1	2	4
COL12A1	Collagen alpha-1(XII) chain	COCA1_HUMAN	50Step_Domain_p1100.0_to_1150.0	1100	1150	50.0 AA STEP	50	3	2	0	2	2	0	1	2	2	TSDPTMSSFR LGELVVGPYDNTVVLEELR	LGELVVGPYDNTVVLEELR TSDPTMSSFR LGELVVGPYDNTVVLEELR TSDPTMSSFR VTWEPAPGEVK	2	1	0	3	3
COL12A1	Collagen alpha-1(XII) chain	COCA1_HUMAN	50Step_Domain_p500.0_to_550.0	500	550	50.0 AA STEP	50	0	2	0	3	1	-0.02	1	1	2	VEDIIEAINTFPYR	VEDIIEAINTFPYR VEDIIEAINTFPYR	0	1	0	5	1
COL12A1	Collagen alpha-1(XII) chain	COCA1_HUMAN	50Step_Domain_p2600.0_to_2650.0	2600	2650	50.0 AA STEP	50	5	4	8	1	2	0.08	0	6	2	GEVQTVTFDTEEVK LLPETPSDPFAIWQITDR GEVQTVTFDTEEVK LLPETPSDPFAIWQITDR GEVQTVTFDTEEVK LLPETPSDPFAIWQITDR	LLPETPSDPFAIWQITDR LLPETPSDPFAIWQITDR	3	2	2	2	3
COL12A1	Collagen alpha-1(XII) chain	COCA1_HUMAN	50Step_Domain_p250.0_to_300.0	250	300	50.0 AA STEP	50	3	4	4	2	1	0.04	0.8618	4	2	SQDEVEIPAR VAIIITDGK NVGVEVFSLGIK SQDEVEIPAR SQDEVEIPAR	SQDEVEIPAR VAIIITDGK SQDEVEIPAR	2	2	1	3	2
COL12A1	Collagen alpha-1(XII) chain	COCA1_HUMAN	50Step_Domain_p2550.0_to_2600.0	2550	2600	50.0 AA STEP	50	5	2	4	1	2	0.04	0.8618	4	2	LLPETPSDPFAIWQITDR NFASVQGVSLESGSFPSYSAYR LLPETPSDPFAIWQITDR LLPETPSDPFAIWQITDR	LLPETPSDPFAIWQITDR LLPETPSDPFAIWQITDR	3	1	1	2	3
COL12A1	Collagen alpha-1(XII) chain	COCA1_HUMAN	50Step_Domain_p1750.0_to_1800.0	1750	1800	50.0 AA STEP	50	5	2	0	2	1	0	1	2	2	ITYQPSTGEGNEQTTTIGGR ITYQPSTGEGNEQTTTIGGR	ITYQPSTGEGNEQTTTIGGR ITYQPSTGEGNEQTTTIGGR	3	1	0	3	2
COL12A1	Collagen alpha-1(XII) chain	COCA1_HUMAN	50Step_Domain_p1800.0_to_1850.0	1800	1850	50.0 AA STEP	50	5	2	0	2	1	0	1	2	2	ITYQPSTGEGNEQTTTIGGR ITYQPSTGEGNEQTTTIGGR	ITYQPSTGEGNEQTTTIGGR ITYQPSTGEGNEQTTTIGGR	3	1	0	3	2
COL12A1	Collagen alpha-1(XII) chain	COCA1_HUMAN	50Step_Domain_p1200.0_to_1250.0	1200	1250	50.0 AA STEP	50	2	0	4	2	1	0	1	2	2	IVEVFDIGPK IVEVFDIGPK	IVEVFDIGPK VQIALAQYSGDPR IVEVFDIGPK VQIALAQYSGDPR	1	0	1	4	2
COL12A1	Collagen alpha-1(XII) chain	COCA1_HUMAN	50Step_Domain_p2050.0_to_2100.0	2050	2100	50.0 AA STEP	50	0	6	0	2	1	0	1	2	2	IIYSPTVGDPIDEYTTVPGR VFGETTNSLSVAWDHADGPVQQYR	IIYSPTVGDPIDEYTTVPGR NNVILQPLQPDTPYK	0	3	0	3	1
COL12A1	Collagen alpha-1(XII) chain	COCA1_HUMAN	50Step_Domain_p2100.0_to_2150.0	2100	2150	50.0 AA STEP	50	2	2	0	1	2	-0.02	1	1	2	VSWDPSPSPVLGYK VSWDPSPSPVLGYK	VSWDPSPSPVLGYK VSWDPSPSPVLGYK	1	1	0	1	3
COL12A1	Collagen alpha-1(XII) chain	COCA1_HUMAN	50Step_Domain_p600.0_to_650.0	600	650	50.0 AA STEP	50	2	2	0	1	1	0	1	1	1	IEQELAAIK SELEAIASPPAETHVFTVEDFDAFQR	DLSFSEVTSYGFK IEQELAAIK IEQELAAIK	1	1	0	2	1
COL12A1	Collagen alpha-1(XII) chain	COCA1_HUMAN	50Step_Domain_p950.0_to_1000.0	950	1000	50.0 AA STEP	50	2	2	0	2	0	0	1	1	1	SLYDDVDTGEK SLYDDVDTGEK	ISVFATYSSGEGEPLTGDATTELSQDSK SLYDDVDTGEK	1	1	0	4	0
COL12A1	Collagen alpha-1(XII) chain	COCA1_HUMAN	50Step_Domain_p1650.0_to_1700.0	1650	1700	50.0 AA STEP	50	0	0	4	1	1	0	1	1	1	ITEVTSEGFR	GTWDHGASDVSLYR ITEVTSEGFR GTWDHGASDVSLYR ITWAPFGSSDK	0	0	1	2	2
COL12A1	Collagen alpha-1(XII) chain	COCA1_HUMAN	50Step_Domain_p1850.0_to_1900.0	1850	1900	50.0 AA STEP	50	2	2	0	1	1	0	1	1	1	VYDPSTSTLNVR VYDPSTSTLNVR	LFYAPAAGGPEELVPIPGNTNYAILR VYDPSTSTLNVR	1	1	0	2	1
COL12A1	Collagen alpha-1(XII) chain	COCA1_HUMAN	50Step_Domain_p150.0_to_200.0	150	200	50.0 AA STEP	50	2	0	0	1	1	0	1	1	1	VGVVQYSSDTR	TEFNLNQYYQR VGVVQYSSDTR TEFNLNQYYQR VGVVQYSSDTR	1	0	0	2	2
COL12A1	Collagen alpha-1(XII) chain	COCA1_HUMAN	50Step_Domain_p800.0_to_850.0	800	850	50.0 AA STEP	50	2	0	0	1	1	0	1	1	1	QYLVTYTPVAGGETQEVTVR	QYLVTYTPVAGGETQEVTVR QYLVTYTPVAGGETQEVTVR	1	0	0	2	2
COL12A1	Collagen alpha-1(XII) chain	COCA1_HUMAN	50Step_Domain_p2400.0_to_2450.0	2400	2450	50.0 AA STEP	50	2	0	4	1	0	0.04	1	2	0	VLVVVTDGR VLVVVTDGR	VLVVVTDGR	1	0	1	2	0
COL12A1	Collagen alpha-1(XII) chain	COCA1_HUMAN	50Step_Domain_p900.0_to_950.0	900	950	50.0 AA STEP	50	2	2	0	1	0	0.02	1	1	0	SLYDDVDTGEK SLYDDVDTGEK	GSPQDLVTK SLYDDVDTGEK	1	1	0	2	0
COL15A1	Collagen alpha-1(XV) chain	COFA1_HUMAN	50Step_Domain_p1300.0_to_1350.0	1300	1350	50.0 AA STEP	50	9	4	0	4	8	-0.04	1	4	6	DIMTDPSWPQK TADTAVTGLASPLSTGK TADTAVTGLASPLSTGK	DIMTDPSWPQK TADTAVTGLASPLSTGK DIMTDPSWPQK TADTAVTGLASPLSTGK	3	2	0	7	13
COL15A1	Collagen alpha-1(XV) chain	COFA1_HUMAN	50Step_Domain_p1350.0_to_1388.0	1350	1388	50.0 AA STEP	38	3	4	0	3	5	-0.0526316	1	2	4	TADTAVTGLASPLSTGK TADTAVTGLASPLSTGK	TADTAVTGLASPLSTGK TADTAVTGLASPLSTGK	1	2	0	5	9
COL15A1	Collagen alpha-1(XV) chain	COFA1_HUMAN	50Step_Domain_p1150.0_to_1200.0	1150	1200	50.0 AA STEP	50	0	4	7	3	2	0.04	1	4	2	DSTEFFIR DSTEFFIR	DSTEFFIR DSTEFFIR	0	2	2	5	3
COL15A1	Collagen alpha-1(XV) chain	COFA1_HUMAN	50Step_Domain_p1250.0_to_1300.0	1250	1300	50.0 AA STEP	50	6	6	4	2	2	0.06	0.0532	5	2	AAGLLSTYR AFLSSHLQDLSTIVR AFLSSHLQDLSTIVR AAGLLSTYR	AAGLLSTYR AAGLLSTYR YSLPIVNLK	2	3	1	4	3
COL15A1	Collagen alpha-1(XV) chain	COFA1_HUMAN	50Step_Domain_p1200.0_to_1250.0	1200	1250	50.0 AA STEP	50	3	0	4	2	1	0	1	2	2	AAGLLSTYR AAGLLSTYR	AAGLLSTYR AAGLLSTYR	1	0	1	4	2
COL15A1	Collagen alpha-1(XV) chain	COFA1_HUMAN	50Step_Domain_p1100.0_to_1150.0	1100	1150	50.0 AA STEP	50	0	0	4	2	0	0	1	1	1	NLVTAFSNMDDMLQK	NLVTAFSNMDDMLQK	0	0	1	3	0
COL18A1	Collagen alpha-1(XVIII) chain	COIA1_HUMAN	50Step_Domain_p1550.0_to_1600.0	1550	1600	50.0 AA STEP	50	2	0	1	5	0	-0.02	0.0648	1	2	DFQPVLHLVALNSPLSGGMR DFQPVLHLVALNSPLSGGMR	DFQPVLHLVALNSPLSGGMR	1	0	1	9	0
COL18A1	Collagen alpha-1(XVIII) chain	COIA1_HUMAN	50Step_Domain_p1700.0_to_1750.0	1700	1750	50.0 AA STEP	50	2	1	2	1	3	0	1	2	2	TEAPSATGQASSLLGGR TEAPSATGQASSLLGGR TEAPSATGQASSLLGGR	TEAPSATGQASSLLGGR TEAPSATGQASSLLGGR	1	1	2	1	1
COL18A1	Collagen alpha-1(XVIII) chain	COIA1_HUMAN	50Step_Domain_p1600.0_to_1650.0	1600	1650	50.0 AA STEP	50	3	4	3	0	3	0.02	0.0072	3	2	AAVPIVNLK LQDLYSIVR AAVPIVNLK DELLFPSWEALFSGSEGPLKPGAR LQDLYSIVR AAVPIVNLK LQDLYSIVR	LQDLYSIVR	2	5	3	0	1
COL1A1	Collagen alpha-1(I) chain	CO1A1_HUMAN	50Step_Domain_p600.0_to_650.0	600	650	50.0 AA STEP	50	8	6	6	7	6	0.02	1	7	6	DGEAGAQGPPGPAGPAGER GVPGPPGAVGPAGK DGEAGAQGPPGPAGPAGER DGEAGAQGPPGPAGPAGER GVPGPPGAVGPAGK	DGEAGAQGPPGPAGPAGER GVPGPPGAVGPAGK DGEAGAQGPPGPAGPAGER	10	6	5	10	3
COL1A1	Collagen alpha-1(I) chain	CO1A1_HUMAN	50Step_Domain_p250.0_to_300.0	250	300	50.0 AA STEP	50	1	1	1	1	4	-0.02	0.129	1	2	GFSGLDGAK GDAGPAGPK GDAGPAGPK	GFSGLDGAK GFSGLDGAK	1	1	1	2	2
COL1A1	Collagen alpha-1(I) chain	CO1A1_HUMAN	50Step_Domain_p550.0_to_600.0	550	600	50.0 AA STEP	50	2	0	1	3	0	-0.02	1	1	2	GVPGPPGAVGPAGK GVPGPPGAVGPAGK	GVPGPPGAVGPAGK	3	0	1	4	0
COL1A1	Collagen alpha-1(I) chain	CO1A1_HUMAN	50Step_Domain_p1050.0_to_1100.0	1050	1100	50.0 AA STEP	50	1	1	1	1	2	-0.02	1	1	2	GPAGPQGPR GPAGPQGPR GPAGPQGPR	GPAGPQGPR GPAGPQGPR	1	1	1	2	1
COL1A1	Collagen alpha-1(I) chain	CO1A1_HUMAN	50Step_Domain_p950.0_to_1000.0	950	1000	50.0 AA STEP	50	2	2	4	2	0	0.04	0.048	3	1	GPPGPMGPPGLAGPPGESGR GPPGPMGPPGLAGPPGESGR GPPGPMGPPGLAGPPGESGR QGPSGASGER	GPPGPMGPPGLAGPPGESGR	3	2	3	3	0
COL1A1	Collagen alpha-1(I) chain	CO1A1_HUMAN	50Step_Domain_p1000.0_to_1050.0	1000	1050	50.0 AA STEP	50	2	2	2	2	0	0.02	1	2	1	GPPGPMGPPGLAGPPGESGR GPPGPMGPPGLAGPPGESGR GPPGPMGPPGLAGPPGESGR	GPPGPMGPPGLAGPPGESGR	3	2	2	3	0
COL1A1	Collagen alpha-1(I) chain	CO1A1_HUMAN	50Step_Domain_p350.0_to_400.0	350	400	50.0 AA STEP	50	1	0	0	0	2	-0.02	1	0	1	GEAGPQGPR	GSEGPQGVR	1	0	0	0	1
COL1A1	Collagen alpha-1(I) chain	CO1A1_HUMAN	50Step_Domain_p150.0_to_200.0	150	200	50.0 AA STEP	50	0	0	1	1	0	0	1	0	0	STGGISVPGPMGPSGPR	STGGISVPGPMGPSGPR	0	0	1	1	0
COL1A2	Collagen alpha-2(I) chain	CO1A2_HUMAN	50Step_Domain_p1250.0_to_1300.0	1250	1300	50.0 AA STEP	50	5	14	8	19	22	-0.22	0	9	20	NSIAYMDEETGNLK AVILQGSNDVELVAEGNSR NSIAYMDEETGNLK NSIAYMDEETGNLKK AVILQGSNDVELVAEGNSR NSIAYMDEETGNLK	AVILQGSNDVELVAEGNSR EMATQLAFMR NSIAYMDEETGNLK NSIAYMDEETGNLKK AVILQGSNDVELVAEGNSR EMATQLAFMR NSIAYMDEETGNLK NSIAYMDEETGNLKK	3	7	5	29	23
COL1A2	Collagen alpha-2(I) chain	CO1A2_HUMAN	50Step_Domain_p1100.0_to_1150.0	1100	1150	50.0 AA STEP	50	5	4	8	8	11	-0.08	0.2324	6	10	SLNNQIETLLTPEGSR SLNNQIETLLTPEGSR DYEVDATLK SLNNQIETLLTPEGSR	DYEVDATLK SLNNQIETLLTPEGSR DYEVDATLK SLNNQIETLLTPEGSR	3	2	5	12	11
COL1A2	Collagen alpha-2(I) chain	CO1A2_HUMAN	50Step_Domain_p1300.0_to_1350.0	1300	1350	50.0 AA STEP	50	0	8	5	10	5	-0.08	0.7924	4	8	AVILQGSNDVELVAEGNSR AVILQGSNDVELVAEGNSR	AVILQGSNDVELVAEGNSR AVILQGSNDVELVAEGNSR	0	4	3	15	5
COL1A2	Collagen alpha-2(I) chain	CO1A2_HUMAN	50Step_Domain_p950.0_to_1000.0	950	1000	50.0 AA STEP	50	18	10	11	5	5	0.16	0	13	5	GETGPSGPVGPAGAVGPR GPSGPQGIR GETGPSGPVGPAGAVGPR GETGPSGPVGPAGAVGPR GPSGPQGIR	GETGPSGPVGPAGAVGPR GETGPSGPVGPAGAVGPR	10	5	7	7	5
COL1A2	Collagen alpha-2(I) chain	CO1A2_HUMAN	50Step_Domain_p250.0_to_300.0	250	300	50.0 AA STEP	50	4	6	6	4	1	0.06	1	5	2	GEIGAVGNAGPAGPAGPR GEIGAVGNAGPAGPAGPR GEIGAVGNAGPAGPAGPR	GEIGAVGNAGPAGPAGPR GEIGAVGNAGPAGPAGPR	2	3	4	6	1
COL1A2	Collagen alpha-2(I) chain	CO1A2_HUMAN	50Step_Domain_p1150.0_to_1200.0	1150	1200	50.0 AA STEP	50	5	6	2	2	2	0.04	1	4	2	SLNNQIETLLTPEGSR LSHPEWSSGYYWIDPNQGCTMDAIK SLNNQIETLLTPEGSR SLNNQIETLLTPEGSR	SLNNQIETLLTPEGSR SLNNQIETLLTPEGSR	3	3	1	3	2
COL1A2	Collagen alpha-2(I) chain	CO1A2_HUMAN	50Step_Domain_p650.0_to_700.0	650	700	50.0 AA STEP	50	4	0	0	2	0	0	1	1	1	GEAGAAGPAGPAGPR	GEAGAAGPAGPAGPR	2	0	0	3	0
COL1A2	Collagen alpha-2(I) chain	CO1A2_HUMAN	50Step_Domain_p700.0_to_750.0	700	750	50.0 AA STEP	50	4	0	0	2	0	0	1	1	1	GEAGAAGPAGPAGPR	GEAGAAGPAGPAGPR	2	0	0	3	0
COL1A2	Collagen alpha-2(I) chain	CO1A2_HUMAN	50Step_Domain_p1050.0_to_1100.0	1050	1100	50.0 AA STEP	50	2	0	2	0	2	0	1	1	1	GPAGPSGPAGK GPAGPSGPAGK	GPAGPSGPAGK	1	0	1	0	2
COL1A2	Collagen alpha-2(I) chain	CO1A2_HUMAN	50Step_Domain_p400.0_to_450.0	400	450	50.0 AA STEP	50	2	2	2	1	0	0.04	1	2	0	GASGPAGVR GASGPAGVR GASGPAGVR	GASGPAGVR	1	1	1	1	0
COL1A2	Collagen alpha-2(I) chain	CO1A2_HUMAN	50Step_Domain_p150.0_to_200.0	150	200	50.0 AA STEP	50	2	0	2	1	0	0.02	1	1	0	GVVGPQGAR GVVGPQGAR	GVVGPQGAR	1	0	1	2	0
COL1A2	Collagen alpha-2(I) chain	CO1A2_HUMAN	50Step_Domain_p50.0_to_100.0	50	100	50.0 AA STEP	50	0	2	0	1	0	0.02	1	1	0	GVGLGPGPMGLMGPR	GVGLGPGPMGLMGPR	0	1	0	1	0
COL2A1	Collagen alpha-1(II) chain	CO2A1_HUMAN	50Step_Domain_p1400.0_to_1450.0	1400	1450	50.0 AA STEP	50	42	95	55	103	91	-0.66	1	64	97	ALLIQGSNDVEIR NSIAYLDEAAGNLK ALLIQGSNDVEIR NSIAYLDEAAGNLK ALLIQGSNDVEIR NSIAYLDEAAGNLK NSIAYLDEAAGNLKK	ALLIQGSNDVEIR NSIAYLDEAAGNLK NSIAYLDEAAGNLKK ALLIQGSNDVEIR NSIAYLDEAAGNLK NSIAYLDEAAGNLKK	13	9	26	168	174
COL2A1	Collagen alpha-1(II) chain	CO2A1_HUMAN	50Step_Domain_p1250.0_to_1300.0	1250	1300	50.0 AA STEP	50	16	53	48	67	126	-1.14	0.024	39	96	QHDAEVDATLK SGDYWIDPNQGCTLDAMK SLNNQIESIR SGDYWIDPNQGCTLDAMK SLNNQIESIR QHDAEVDATLK SGDYWIDPNQGCTLDAMK SLNNQIESIR	QHDAEVDATLK SGDYWIDPNQGCTLDAMK SLNNQIESIR QHDAEVDATLK SGDYWIDPNQGCTLDAMK SLNNQIESIR	5	5	23	110	240
COL2A1	Collagen alpha-1(II) chain	CO2A1_HUMAN	50Step_Domain_p1100.0_to_1150.0	1100	1150	50.0 AA STEP	50	214	95	168	116	65	1.38	0.003	159	90	GEAGAQGPMGPSGPAGAR QGDRGEAGAQGPMGPSGPAGAR GEAGAQGPMGPSGPAGAR GIQGPQGPR QGDRGEAGAQGPMGPSGPAGAR GEAGAQGPMGPSGPAGAR GIQGPQGPR QGDRGEAGAQGPMGPSGPAGAR	GEAGAQGPMGPSGPAGAR GIQGPQGPR QGDRGEAGAQGPMGPSGPAGAR GEAGAQGPMGPSGPAGAR GFTGLQGLPGPPGPSGDQGASGPAGPSGPR GIQGPQGPR QGDRGEAGAQGPMGPSGPAGAR	67	9	80	190	123
COL2A1	Collagen alpha-1(II) chain	CO2A1_HUMAN	50Step_Domain_p1050.0_to_1100.0	1050	1100	50.0 AA STEP	50	214	74	162	114	62	1.24	0.009	150	88	GEAGAQGPMGPSGPAGAR QGDRGEAGAQGPMGPSGPAGAR GEAGAQGPMGPSGPAGAR QGDRGEAGAQGPMGPSGPAGAR GEAGAQGPMGPSGPAGAR QGDRGEAGAQGPMGPSGPAGAR	GEAGAQGPMGPSGPAGAR QGDRGEAGAQGPMGPSGPAGAR GEAGAQGPMGPSGPAGAR QGDRGEAGAQGPMGPSGPAGAR	67	7	77	187	118
COL2A1	Collagen alpha-1(II) chain	CO2A1_HUMAN	50Step_Domain_p1200.0_to_1250.0	1200	1250	50.0 AA STEP	50	6	0	23	32	95	-1.08	0.048	10	64	QHDAEVDATLK QHDAEVDATLK	QHDAEVDATLK GPDPLQYMR QHDAEVDATLK	2	0	11	52	181
COL2A1	Collagen alpha-1(II) chain	CO2A1_HUMAN	50Step_Domain_p1350.0_to_1400.0	1350	1400	50.0 AA STEP	50	19	74	21	37	44	-0.04	1	38	40	NSIAYLDEAAGNLK NSIAYLDEAAGNLK NSIAYLDEAAGNLK NSIAYLDEAAGNLKK	NSIAYLDEAAGNLK NSIAYLDEAAGNLKK NSIAYLDEAAGNLK NSIAYLDEAAGNLKK	6	7	10	60	84
COL2A1	Collagen alpha-1(II) chain	CO2A1_HUMAN	50Step_Domain_p1300.0_to_1350.0	1300	1350	50.0 AA STEP	50	3	11	15	30	25	-0.36	1	10	28	SGDYWIDPNQGCTLDAMK SGDYWIDPNQGCTLDAMK SGDYWIDPNQGCTLDAMK	SGDYWIDPNQGCTLDAMK SGDYWIDPNQGCTLDAMK	1	1	7	49	47
COL2A1	Collagen alpha-1(II) chain	CO2A1_HUMAN	50Step_Domain_p750.0_to_800.0	750	800	50.0 AA STEP	50	0	11	2	20	20	-0.32	1	4	20	GDVGEKGPEGAPGK GPEGAPGK	GAAGIAGPK GDRGDVGEKGPEGAPGK GDVGEKGPEGAPGK GDVGEKGPEGAPGKDGGR GPEGAPGK GDRGDVGEKGPEGAPGK GDVGEKGPEGAPGK GPEGAPGKDGGR GPEGAPGK	0	1	1	33	39
COL2A1	Collagen alpha-1(II) chain	CO2A1_HUMAN	50Step_Domain_p150.0_to_200.0	150	200	50.0 AA STEP	50	26	32	10	13	11	0.22	1	23	12	AGGAQLGVMQGPMGPMGPR AGGAQLGVMQGPMGPMGPR AGGAQLGVMQGPMGPMGPR	AGGAQLGVMQGPMGPMGPR AGGAQLGVMQGPMGPMGPR	8	3	5	22	21
COL2A1	Collagen alpha-1(II) chain	CO2A1_HUMAN	50Step_Domain_p200.0_to_250.0	200	250	50.0 AA STEP	50	26	32	10	13	11	0.22	1	23	12	AGGAQLGVMQGPMGPMGPR AGGAQLGVMQGPMGPMGPR AGGAQLGVMQGPMGPMGPR	AGGAQLGVMQGPMGPMGPR AGGAQLGVMQGPMGPMGPR	8	3	5	22	21
COL2A1	Collagen alpha-1(II) chain	CO2A1_HUMAN	50Step_Domain_p350.0_to_400.0	350	400	50.0 AA STEP	50	16	21	25	7	8	0.26	1	21	8	GPEGAQGPR GPEGAQGPR GPEGAQGPR	GEAGPTGAR GPEGAQGPR GPEGAQGPR	5	2	12	11	15
COL2A1	Collagen alpha-1(II) chain	CO2A1_HUMAN	50Step_Domain_p500.0_to_550.0	500	550	50.0 AA STEP	50	3	11	4	5	8	0	1	6	6	GPSGLAGPK GPSGLAGPK GPSGLAGPK	GPSGLAGPK GPSGLAGPK	1	1	2	8	15
COL2A1	Collagen alpha-1(II) chain	CO2A1_HUMAN	50Step_Domain_p1150.0_to_1200.0	1150	1200	50.0 AA STEP	50	6	0	13	5	7	0	1	6	6	GPPGPVGPSGK GPPGPVGPSGK	GPPGPVGPSGK GFTGLQGLPGPPGPSGDQGASGPAGPSGPR GPPGPVGPSGK	2	0	6	8	13
COL2A1	Collagen alpha-1(II) chain	CO2A1_HUMAN	50Step_Domain_p300.0_to_350.0	300	350	50.0 AA STEP	50	3	11	10	4	5	0.08	1	8	4	TGPAGAAGAR TGPAGAAGAR TGPAGAAGAR	GESGSPGENGSPGPMGPR TGPAGAAGAR TGPAGAAGAR	1	1	5	7	10
COL2A1	Collagen alpha-1(II) chain	CO2A1_HUMAN	50Step_Domain_p950.0_to_1000.0	950	1000	50.0 AA STEP	50	3	11	6	2	5	0.06	1	7	4	GEPGDDGPSGAEGPPGPQGLAGQR GEPGDDGPSGAEGPPGPQGLAGQR GEPGDDGPSGAEGPPGPQGLAGQR	GEPGDDGPSGAEGPPGPQGLAGQR GEPGDDGPSGAEGPPGPQGLAGQR	1	1	3	4	10
COL2A1	Collagen alpha-1(II) chain	CO2A1_HUMAN	50Step_Domain_p1000.0_to_1050.0	1000	1050	50.0 AA STEP	50	0	11	2	2	2	0.04	1	4	2	QGAPGASGDR QGAPGASGDR	GPPGPVGPPGLTGPAGEPGR QGAPGASGDR GPPGPVGPPGLTGPAGEPGR QGAPGASGDR	0	1	1	3	3
COL2A1	Collagen alpha-1(II) chain	CO2A1_HUMAN	50Step_Domain_p600.0_to_650.0	600	650	50.0 AA STEP	50	10	0	2	3	1	0.04	1	4	2	DGETGAAGPPGPAGPAGER GLPGAPGLR DGETGAAGPPGPAGPAGER	DGETGAAGPPGPAGPAGER GLPGAPGLR DGETGAAGPPGPAGPAGER	3	0	1	5	1
COL2A1	Collagen alpha-1(II) chain	CO2A1_HUMAN	50Step_Domain_p100.0_to_150.0	100	150	50.0 AA STEP	50	10	0	2	1	1	0.06	1	4	1	GPPGPQGPAGEQGPR GPPGPQGPAGEQGPR	GPPGPQGPAGEQGPR GPPGPQGPAGEQGPR	3	0	1	1	1
COL2A1	Collagen alpha-1(II) chain	CO2A1_HUMAN	50Step_Domain_p650.0_to_700.0	650	700	50.0 AA STEP	50	3	0	2	1	1	0.02	1	2	1	DGETGAAGPPGPAGPAGER DGETGAAGPPGPAGPAGER	DGETGAAGPPGPAGPAGER DGETGAAGPPGPAGPAGER	1	0	1	1	1
COL3A1	Collagen alpha-1(III) chain	CO3A1_HUMAN	50Step_Domain_p1200.0_to_1250.0	1200	1250	50.0 AA STEP	50	0	0	4	6	9	-0.14	0	1	8	INTDEIMTSLK SVNGQIESLISPDGSR	INTDEIMTSLK SVNGQIESLISPDGSR INTDEIMTSLK SVNGQIESLISPDGSR	0	0	3	9	14
COL3A1	Collagen alpha-1(III) chain	CO3A1_HUMAN	50Step_Domain_p1350.0_to_1400.0	1350	1400	50.0 AA STEP	50	3	8	5	4	3	0.02	0.204	5	4	NSIAYMDQASGNVK NSIAYMDQASGNVK NSIAYMDQASGNVK	LMGSNEGEFK NSIAYMDQASGNVK NSIAYMDQASGNVK	2	3	4	6	5
COL3A1	Collagen alpha-1(III) chain	CO3A1_HUMAN	50Step_Domain_p1250.0_to_1300.0	1250	1300	50.0 AA STEP	50	0	0	1	3	3	-0.06	0.003	0	3	SVNGQIESLISPDGSR	SVNGQIESLISPDGSR SVNGQIESLISPDGSR	0	0	1	5	5
COL3A1	Collagen alpha-1(III) chain	CO3A1_HUMAN	50Step_Domain_p600.0_to_650.0	600	650	50.0 AA STEP	50	7	3	4	3	1	0.06	0.003	5	2	NGETGPQGPPGPTGPGGDK NGETGPQGPPGPTGPGGDK NGETGPQGPPGPTGPGGDK	NGETGPQGPPGPTGPGGDK NGETGPQGPPGPTGPGGDK	5	1	3	4	2
COL3A1	Collagen alpha-1(III) chain	CO3A1_HUMAN	50Step_Domain_p1100.0_to_1150.0	1100	1150	50.0 AA STEP	50	1	3	0	1	0	0.02	1	1	0	GPVGPSGPPGK GPVGPSGPPGK	GPVGPSGPPGK	1	1	0	1	0
COL5A1	Collagen alpha-1(V) chain	CO5A1_HUMAN	50Step_Domain_p1750.0_to_1800.0	1750	1800	50.0 AA STEP	50	16	16	9	7	9	0.12	0	14	8	FLGSNDEEMSYDNNPYIR TVLEIDTPK FLGSNDEEMSYDNNPYIR TVLEIDTPK FLGSNDEEMSYDNNPYIR TVLEIDTPK	FLGSNDEEMSYDNNPYIR TVLEIDTPK FLGSNDEEMSYDNNPYIR TVLEIDTPK	3	3	4	12	16
COL5A1	Collagen alpha-1(V) chain	CO5A1_HUMAN	50Step_Domain_p1700.0_to_1750.0	1700	1750	50.0 AA STEP	50	0	0	4	5	5	-0.08	0	1	5	ENPGSWFSEFK	ENPGSWFSEFK LLSYVDAEGNPVGVVQMTFLR ENPGSWFSEFK LLSYVDAEGNPVGVVQMTFLR	0	0	2	9	9
COL5A1	Collagen alpha-1(V) chain	CO5A1_HUMAN	50Step_Domain_p1800.0_to_1838.0	1800	1838	50.0 AA STEP	38	5	5	4	3	3	0.0526316	0.6771	5	3	TVLEIDTPK TVLEIDTPK TVLEIDTPK	TVLEIDTPK VEQVPIVDIMFNDFGEASQK TVLEIDTPK VEQVPIVDIMFNDFGEASQK	1	1	2	5	6
COL5A1	Collagen alpha-1(V) chain	CO5A1_HUMAN	50Step_Domain_p1650.0_to_1700.0	1650	1700	50.0 AA STEP	50	0	0	4	2	2	-0.02	1	1	2	ENPGSWFSEFK	ENPGSWFSEFK ENPGSWFSEFK	0	0	2	3	4
COL5A1	Collagen alpha-1(V) chain	CO5A1_HUMAN	50Step_Domain_p50.0_to_100.0	50	100	50.0 AA STEP	50	0	0	2	2	0	0	1	1	1	VLDFHNLPDGITK	DAQLSAPTK QLYPASAFPEDFSILTTVK	0	0	1	3	0
COL6A1	Collagen alpha-1(VI) chain	CO6A1_HUMAN	50Step_Domain_p950.0_to_1000.0	950	1000	50.0 AA STEP	50	36	14	34	28	59	-0.32	0.9471	28	44	LLLFSDGNSQGATPAAIEK TAEYDVAYGESHLFR LLLFSDGNSQGATPAAIEK TAEYDVAYGESHLFR LLLFSDGNSQGATPAAIEK TAEYDVAYGESHLFR	LLLFSDGNSQGATPAAIEK QVNEPHIR TAEYDVAYGESHLFR LLLFSDGNSQGATPAAIEK TAEYDVAYGESHLFR	16	7	18	43	62
COL6A1	Collagen alpha-1(VI) chain	CO6A1_HUMAN	50Step_Domain_p150.0_to_200.0	150	200	50.0 AA STEP	50	36	43	34	33	49	-0.06	1	38	41	LSIIATDHTYR VFSVAITPDHLEPR YLIVVTDGHPLEGYK LSIIATDHTYR VFSVAITPDHLEPR YLIVVTDGHPLEGYK LSIIATDHTYR VFSVAITPDHLEPR YLIVVTDGHPLEGYK	LSIIATDHTYR VFSVAITPDHLEPR YLIVVTDGHPLEGYK LSIIATDHTYR VFSVAITPDHLEPR YLIVVTDGHPLEGYK	16	22	18	52	52
COL6A1	Collagen alpha-1(VI) chain	CO6A1_HUMAN	50Step_Domain_p1000.0_to_1028.0	1000	1028	50.0 AA STEP	28	16	14	21	19	47	-0.571429	0.8148	17	33	TAEYDVAYGESHLFR VPSYQALLR TAEYDVAYGESHLFR VPSYQALLR TAEYDVAYGESHLFR VPSYQALLR	TAEYDVAYGESHLFR VPSYQALLR TAEYDVAYGESHLFR VPSYQALLR	7	7	11	30	50
COL6A1	Collagen alpha-1(VI) chain	CO6A1_HUMAN	50Step_Domain_p200.0_to_250.0	200	250	50.0 AA STEP	50	39	47	54	43	20	0.3	1	47	32	DAEEAISQTIDTIVDMIK LSIIATDHTYR DAEEAISQTIDTIVDMIK LSIIATDHTYR DAEEAISQTIDTIVDMIK LSIIATDHTYR	DAEEAISQTIDTIVDMIK LSIIATDHTYR DAEEAISQTIDTIVDMIK LSIIATDHTYR	17	24	29	67	21
COL6A1	Collagen alpha-1(VI) chain	CO6A1_HUMAN	50Step_Domain_p700.0_to_750.0	700	750	50.0 AA STEP	50	9	21	21	35	28	-0.3	1	17	32	DQLLPPSPNNR IALVITDGR DQLLPPSPNNR IALVITDGR SLQWMAGGTFTGEALQYTR DQLLPPSPNNR IALVITDGR	DQLLPPSPNNR DTTPLNVLCSPGIQVVSVGIK IALVITDGR SLQWMAGGTFTGEALQYTR DQLLPPSPNNR IALVITDGR SLQWMAGGTFTGEALQYTR	4	11	11	55	30
COL6A1	Collagen alpha-1(VI) chain	CO6A1_HUMAN	50Step_Domain_p650.0_to_700.0	650	700	50.0 AA STEP	50	0	16	0	22	6	-0.18	1	5	14	FEPGQSYAGVVQYSHSQMQEHVSLR SLQWMAGGTFTGEALQYTR	FEPGQSYAGVVQYSHSQMQEHVSLR SLQWMAGGTFTGEALQYTR FEPGQSYAGVVQYSHSQMQEHVSLR SLQWMAGGTFTGEALQYTR	0	8	0	35	6
COL6A1	Collagen alpha-1(VI) chain	CO6A1_HUMAN	50Step_Domain_p750.0_to_800.0	750	800	50.0 AA STEP	50	7	4	21	26	1	-0.06	1	11	14	ENYAELLEDAFLK ENYAELLEDAFLK ENYAELLEDAFLK	DTTPLNVLCSPGIQVVSVGIK ENYAELLEDAFLK ENYAELLEDAFLK	3	2	11	40	1
COL6A1	Collagen alpha-1(VI) chain	CO6A1_HUMAN	50Step_Domain_p900.0_to_950.0	900	950	50.0 AA STEP	50	23	8	17	11	15	0.06	1	16	13	LLLFSDGNSQGATPAAIEK LLLFSDGNSQGATPAAIEK LLLFSDGNSQGATPAAIEK	LLLFSDGNSQGATPAAIEK LLLFSDGNSQGATPAAIEK	10	4	9	17	16
COL6A1	Collagen alpha-1(VI) chain	CO6A1_HUMAN	50Step_Domain_p800.0_to_850.0	800	850	50.0 AA STEP	50	7	4	21	24	1	-0.02	1	11	12	ENYAELLEDAFLK ENYAELLEDAFLK ENYAELLEDAFLK	ENYAELLEDAFLK ENYAELLEDAFLK	3	2	11	38	1
COL6A1	Collagen alpha-1(VI) chain	CO6A1_HUMAN	50Step_Domain_p850.0_to_900.0	850	900	50.0 AA STEP	50	2	0	2	1	15	-0.14	1	1	8	VAVVQYSGTGQQRPER VAVVQYSGTGQQRPER	VAVVQYSGTGQQRPER TDPAHDVR VAVVQYSGTGQQRPER	1	0	1	2	16
COL6A1	Collagen alpha-1(VI) chain	CO6A1_HUMAN	50Step_Domain_p100.0_to_150.0	100	150	50.0 AA STEP	50	48	39	15	8	6	0.54	0.0147	34	7	GLEQLLVGGSHLK NLVWNAGALHYSDEVEIIQGLTR GLEQLLVGGSHLK NLVWNAGALHYSDEVEIIQGLTR NLVWNAGALHYSDEVEIIQGLTR	GLEQLLVGGSHLK DALKSSVDAVK GLEQLLVGGSHLK GTYTDCAIK	21	20	8	13	6
COL6A1	Collagen alpha-1(VI) chain	CO6A1_HUMAN	50Step_Domain_p50.0_to_100.0	50	100	50.0 AA STEP	50	50	27	21	7	5	0.54	0.0168	33	6	LKPYGALVDK NLVWNAGALHYSDEVEIIQGLTR LKPYGALVDK NLVWNAGALHYSDEVEIIQGLTR LKPYGALVDK NLVWNAGALHYSDEVEIIQGLTR	LKPYGALVDK LKPYGALVDK	22	14	11	11	5
COL6A2	Collagen alpha-2(VI) chain	CO6A2_HUMAN	50Step_Domain_p700.0_to_750.0	700	750	50.0 AA STEP	50	23	15	15	21	21	-0.06	1	18	21	NLEWIAGGTWTPSALK VFAVVITDGR NLEWIAGGTWTPSALK VFAVVITDGR NLEWIAGGTWTPSALK VFAVVITDGR	NLEWIAGGTWTPSALK VFAVVITDGR NLEWIAGGTWTPSALK VFAVVITDGR	9	8	8	33	30
COL6A2	Collagen alpha-2(VI) chain	CO6A2_HUMAN	50Step_Domain_p650.0_to_700.0	650	700	50.0 AA STEP	50	28	17	30	17	23	0.1	1	25	20	IDSLSSFK NLEWIAGGTWTPSALK VGVVQYSHEGTFEAIQLDDER IDSLSSFK NLEWIAGGTWTPSALK VGVVQYSHEGTFEAIQLDDER VGVVQYSHEGTFEAIQLDDERIDSLSSFK IDSLSSFK NLEWIAGGTWTPSALK VGVVQYSHEGTFEAIQLDDER	IDSLSSFK NLEWIAGGTWTPSALK VGVVQYSHEGTFEAIQLDDER IDSLSSFK NLEWIAGGTWTPSALK VGVVQYSHEGTFEAIQLDDER	11	9	16	28	32
COL6A2	Collagen alpha-2(VI) chain	CO6A2_HUMAN	50Step_Domain_p750.0_to_800.0	750	800	50.0 AA STEP	50	20	19	13	14	15	0.06	1	17	14	DVTVTAIGIGDMFHEK DVTVTAIGIGDMFHEK DVTVTAIGIGDMFHEK	DVTVTAIGIGDMFHEK HESENLYSIACDKPQQVR DVTVTAIGIGDMFHEK HESENLYSIACDKPQQVR	8	10	7	23	21
COL6A2	Collagen alpha-2(VI) chain	CO6A2_HUMAN	50Step_Domain_p100.0_to_150.0	100	150	50.0 AA STEP	50	10	11	15	9	17	-0.02	1	12	13	NLQGISSFR YGGLHFSDQVEVFSPPGSDR NLQGISSFR YGGLHFSDQVEVFSPPGSDR NLQGISSFR YGGLHFSDQVEVFSPPGSDR	NLQGISSFR YGGLHFSDQVEVFSPPGSDR NLQGISSFR YGGLHFSDQVEVFSPPGSDR	4	6	8	14	24
COL6A2	Collagen alpha-2(VI) chain	CO6A2_HUMAN	50Step_Domain_p850.0_to_900.0	850	900	50.0 AA STEP	50	3	0	0	12	14	-0.24	0	1	13	DDDPLNAR	DDDPLNAR LGEQNFHK RDDDPLNAR LGEQNFHK RDDDPLNAR	1	0	0	19	20
COL6A2	Collagen alpha-2(VI) chain	CO6A2_HUMAN	50Step_Domain_p200.0_to_250.0	200	250	50.0 AA STEP	50	13	19	19	14	11	0.1	1	17	12	NDYATMLPDSTEIDQDTINR DIASTPHELYR NDYATMLPDSTEIDQDTINR DIASTPHELYR NDYATMLPDSTEIDQDTINR	DIASTPHELYR DIASTPHELYRNDYATMLPDSTEIDQDTINR NDYATMLPDSTEIDQDTINR DIASTPHELYR NDYATMLPDSTEIDQDTINR	5	10	10	22	15
COL6A2	Collagen alpha-2(VI) chain	CO6A2_HUMAN	50Step_Domain_p1000.0_to_1019.0	1000	1019	50.0 AA STEP	19	8	6	9	16	6	-0.157895	1	8	11	DYDSLAQPGFFDR DYDSLAQPGFFDR DYDSLAQPGFFDR	DYDSLAQPGFFDR DYDSLAQPGFFDR	3	3	5	26	9
COL6A2	Collagen alpha-2(VI) chain	CO6A2_HUMAN	50Step_Domain_p50.0_to_100.0	50	100	50.0 AA STEP	50	5	9	13	4	14	0	1	9	9	YGGLHFSDQVEVFSPPGSDR YGGLHFSDQVEVFSPPGSDR YGGLHFSDQVEVFSPPGSDR	YGGLHFSDQVEVFSPPGSDR YGGLHFSDQVEVFSPPGSDR	2	5	7	6	19
COL6A2	Collagen alpha-2(VI) chain	CO6A2_HUMAN	50Step_Domain_p150.0_to_200.0	150	200	50.0 AA STEP	50	5	6	6	2	4	0.06	1	6	3	LFAVAPNQNLK LFAVAPNQNLK LFAVAPNQNLK	LFAVAPNQNLK LFAVAPNQNLK	2	3	3	4	5
COL6A2	Collagen alpha-2(VI) chain	CO6A2_HUMAN	50Step_Domain_p600.0_to_650.0	600	650	50.0 AA STEP	50	0	2	2	2	1	-0.02	1	1	2	NFVINVVNR NFVINVVNR	NFVINVVNR NFVINVVNR	0	1	1	3	1
COL6A3	Collagen alpha-3(VI) chain	CO6A3_HUMAN	50Step_Domain_p1900.0_to_1950.0	1900	1950	50.0 AA STEP	50	44	41	150	41	45	0.7	0.0128	78	43	SQHPYVLTEDTLK VSVVANTPSGPVEAFDFDEYQPEMLEK VVIHFTDGADGDLADLHR SQHPYVLTEDTLK VSVVANTPSGPVEAFDFDEYQPEMLEK VVIHFTDGADGDLADLHR SQHPYVLTEDTLK VSVVANTPSGPVEAFDFDEYQPEMLEK VVIHFTDGADGDLADLHR	SQHPYVLTEDTLK VSVVANTPSGPVEAFDFDEYQPEMLEK VVIHFTDGADGDLADLHR QSSPDSVK SQHPYVLTEDTLK VSVVANTPSGPVEAFDFDEYQPEMLEK VVIHFTDGADGDLADLHR	19	26	135	64	66
COL6A3	Collagen alpha-3(VI) chain	CO6A3_HUMAN	50Step_Domain_p2450.0_to_2500.0	2450	2500	50.0 AA STEP	50	16	11	14	28	32	-0.32	1	14	30	NLQVALTSK QQSLETAMSFVAR QQSLETAMSFVAR VAVVTYNNEVTTEIR NLQVALTSK QQSLETAMSFVAR VAVVTYNNEVTTEIR	NLQVALTSK QQSLETAMSFVAR VAVVTYNNEVTTEIR NLQVALTSK QQSLETAMSFVAR VAVVTYNNEVTTEIR	7	7	13	44	47
COL6A3	Collagen alpha-3(VI) chain	CO6A3_HUMAN	50Step_Domain_p1550.0_to_1600.0	1550	1600	50.0 AA STEP	50	21	19	21	25	21	-0.06	1	20	23	IEDGVPQHLVLVLGGK SSGIVSLGVGDR TELQTITNDPR IEDGVPQHLVLVLGGK SSGIVSLGVGDR TELQTITNDPR IEDGVPQHLVLVLGGK SSGIVSLGVGDR TELQTITNDPR	IEDGVPQHLVLVLGGK SSGIVSLGVGDR TELQTITNDPR IEDGVPQHLVLVLGGK SSGIVSLGVGDR TELQTITNDPR	9	12	19	39	31
COL6A3	Collagen alpha-3(VI) chain	CO6A3_HUMAN	50Step_Domain_p1500.0_to_1550.0	1500	1550	50.0 AA STEP	50	14	16	19	24	18	-0.1	1	16	21	IEDGVPQHLVLVLGGK SQAPVLDAIR IEDGVPQHLVLVLGGK SQAPVLDAIR IEDGVPQHLVLVLGGK SQAPVLDAIR	IEDGVPQHLVLVLGGK SQAPVLDAIR IEDGVPQHLVLVLGGK SQAPVLDAIR	6	10	17	37	27
COL6A3	Collagen alpha-3(VI) chain	CO6A3_HUMAN	50Step_Domain_p1350.0_to_1400.0	1350	1400	50.0 AA STEP	50	14	13	9	17	18	-0.12	1	12	18	ELPSLEQK ISLSPEYVFSVSTFR SDDEVDDPAVELK ELPSLEQK ISLSPEYVFSVSTFR SDDEVDDPAVELK ELPSLEQK ISLSPEYVFSVSTFR SDDEVDDPAVELK	ELPSLEQK ISLSPEYVFSVSTFR NADQEELVK QFGVAPFTIAR SDDEVDDPAVELK ELPSLEQK ISLSPEYVFSVSTFR NADQEELVK SDDEVDDPAVELK	6	8	8	26	27
COL6A3	Collagen alpha-3(VI) chain	CO6A3_HUMAN	50Step_Domain_p2000.0_to_2050.0	2000	2050	50.0 AA STEP	50	7	13	12	27	8	-0.14	1	11	18	GPIGSIGPK LNLLDLDYELAEQLDNIAEK LNLLDLDYELAEQLDNIAEK GPIGSIGPK LNLLDLDYELAEQLDNIAEK	GPIGSIGPK LNLLDLDYELAEQLDNIAEK GPIGSIGPK LNLLDLDYELAEQLDNIAEK	3	8	11	42	12
COL6A3	Collagen alpha-3(VI) chain	CO6A3_HUMAN	50Step_Domain_p1950.0_to_2000.0	1950	2000	50.0 AA STEP	50	23	22	144	15	19	0.92	0	63	17	ALILVGLER VVIHFTDGADGDLADLHR ALILVGLER VVIHFTDGADGDLADLHR ALILVGLER VVIHFTDGADGDLADLHR	ALILVGLER LMHLEFGR VVIHFTDGADGDLADLHR ALILVGLER LMHLEFGR VVIHFTDGADGDLADLHR	10	14	129	24	28
COL6A3	Collagen alpha-3(VI) chain	CO6A3_HUMAN	50Step_Domain_p850.0_to_900.0	850	900	50.0 AA STEP	50	14	24	12	8	25	0.02	1	17	16	IAVAQYSDDVK IIDELNVKPEGTR DILFLFDGSANLVGQFPVVR FDEHQSKPEILNLVK IAVAQYSDDVK IIDELNVKPEGTR IAVAQYSDDVK IIDELNVKPEGTR	IAVAQYSDDVK IIDELNVKPEGTR IAVAQYSDDVK IIDELNVKPEGTR	6	15	11	13	36
COL6A3	Collagen alpha-3(VI) chain	CO6A3_HUMAN	50Step_Domain_p1750.0_to_1800.0	1750	1800	50.0 AA STEP	50	21	11	4	16	17	-0.08	1	12	16	IASNSATAFR SVEDAQDVSLALTQR VPQIAFVITGGK SVEDAQDVSLALTQR VPQIAFVITGGK IASNSATAFR SVEDAQDVSLALTQR	IASNSATAFR NIDSEEVGK SVEDAQDVSLALTQR VPQIAFVITGGK IASNSATAFR NIDSEEVGK SVEDAQDVSLALTQR VPQIAFVITGGK	9	7	4	25	25
COL6A3	Collagen alpha-3(VI) chain	CO6A3_HUMAN	50Step_Domain_p1300.0_to_1350.0	1300	1350	50.0 AA STEP	50	19	16	9	14	18	-0.02	1	15	16	IEEGVPQFLVLISSGK QINVGNALEYVSR SDDEVDDPAVELK IEEGVPQFLVLISSGK QINVGNALEYVSR SDDEVDDPAVELK IEEGVPQFLVLISSGK QINVGNALEYVSR SDDEVDDPAVELK	DEVQNAVQR IEEGVPQFLVLISSGK QINVGNALEYVSR SDDEVDDPAVELK DEVQNAVQR IEEGVPQFLVLISSGK QINVGNALEYVSR SDDEVDDPAVELK	8	10	8	22	26
COL6A3	Collagen alpha-3(VI) chain	CO6A3_HUMAN	50Step_Domain_p2400.0_to_2450.0	2400	2450	50.0 AA STEP	50	0	8	4	15	16	-0.24	1	4	16	VAVVTYNNEVTTEIR VAVVTYNNEVTTEIR	VAVVTYNNEVTTEIR VAVVTYNNEVTTEIR	0	5	4	24	24
COL6A3	Collagen alpha-3(VI) chain	CO6A3_HUMAN	50Step_Domain_p1850.0_to_1900.0	1850	1900	50.0 AA STEP	50	19	14	6	15	15	-0.04	1	13	15	DQNVFVAQK VSVVANTPSGPVEAFDFDEYQPEMLEK VSVVANTPSGPVEAFDFDEYQPEMLEK DQNVFVAQK VSVVANTPSGPVEAFDFDEYQPEMLEK	DQNVFVAQK VSVVANTPSGPVEAFDFDEYQPEMLEK DQNVFVAQK VSVVANTPSGPVEAFDFDEYQPEMLEK	8	9	5	24	22
COL6A3	Collagen alpha-3(VI) chain	CO6A3_HUMAN	50Step_Domain_p1250.0_to_1300.0	1250	1300	50.0 AA STEP	50	30	32	10	11	16	0.2	1	24	14	DVVFLIDGSQSAGPEFQYVR LVDYLDVGFDTTR VAVIQFSDDPK DVVFLIDGSQSAGPEFQYVR LVDYLDVGFDTTR RDVVFLIDGSQSAGPEFQYVR VAVIQFSDDPK VEFLLNAHSSK DVVFLIDGSQSAGPEFQYVR LVDYLDVGFDTTR VAVIQFSDDPK VEFLLNAHSSK	DEVQNAVQR DVVFLIDGSQSAGPEFQYVR LVDYLDVGFDTTR VAVIQFSDDPK VEFLLNAHSSK DEVQNAVQR DVVFLIDGSQSAGPEFQYVR LVDYLDVGFDTTR VAVIQFSDDPK VEFLLNAHSSK	13	20	9	18	24
COL6A3	Collagen alpha-3(VI) chain	CO6A3_HUMAN	50Step_Domain_p1450.0_to_1500.0	1450	1500	50.0 AA STEP	50	14	11	11	12	12	0	1	12	12	SQAPVLDAIR VGVVQFSNDVFPEFYLK SQAPVLDAIR VGVVQFSNDVFPEFYLK YPPPAVESDAADIVFLIDSSEGVRPDGFAHIR SQAPVLDAIR VGVVQFSNDVFPEFYLK	SQAPVLDAIR VGVVQFSNDVFPEFYLK SQAPVLDAIR VGVVQFSNDVFPEFYLK	6	7	10	19	17
COL6A3	Collagen alpha-3(VI) chain	CO6A3_HUMAN	50Step_Domain_p1050.0_to_1100.0	1050	1100	50.0 AA STEP	50	14	8	3	13	10	-0.08	1	8	12	VAVVQYSDR VVESLDVGQDR QLTLLGGPTPNTGAALEFVLR TRPEFYLNSYMNK VVESLDVGQDR QLTLLGGPTPNTGAALEFVLR VVESLDVGQDR	QDVVNAVR QLTLLGGPTPNTGAALEFVLR TRPEFYLNSYMNK VAVVQYSDR VVESLDVGQDR QDVVNAVR QLTLLGGPTPNTGAALEFVLR TRPEFYLNSYMNK VVESLDVGQDR	6	5	3	21	14
COL6A3	Collagen alpha-3(VI) chain	CO6A3_HUMAN	50Step_Domain_p1200.0_to_1250.0	1200	1250	50.0 AA STEP	50	16	30	13	9	10	0.2	1	20	10	DVVFLIDGSQSAGPEFQYVR LQPVLQPLPSPGVGGK QLGTVQQVISER DVVFLIDGSQSAGPEFQYVR LQPVLQPLPSPGVGGK QLGTVQQVISER RDVVFLIDGSQSAGPEFQYVR DVVFLIDGSQSAGPEFQYVR LQPVLQPLPSPGVGGK QLGTVQQVISER	DVVFLIDGSQSAGPEFQYVR LQPVLQPLPSPGVGGK QLGTVQQVISER DVVFLIDGSQSAGPEFQYVR LQPVLQPLPSPGVGGK QLGTVQQVISER	7	19	12	14	15
COL6A3	Collagen alpha-3(VI) chain	CO6A3_HUMAN	50Step_Domain_p1400.0_to_1450.0	1400	1450	50.0 AA STEP	50	12	11	11	10	9	0.02	1	11	10	ELPSLEQK LLTPITTLTSEQIQK ELPSLEQK LLTPITTLTSEQIQK YPPPAVESDAADIVFLIDSSEGVRPDGFAHIR ELPSLEQK LLTPITTLTSEQIQK	ELPSLEQK LLTPITTLTSEQIQK ELPSLEQK LLTPITTLTSEQIQK	5	7	10	15	13
COL6A3	Collagen alpha-3(VI) chain	CO6A3_HUMAN	50Step_Domain_p2500.0_to_2550.0	2500	2550	50.0 AA STEP	50	16	9	4	11	8	0	1	10	10	LSDAGITPLFLTR VAVFFSNTPTR LSDAGITPLFLTR VAVFFSNTPTR LSDAGITPLFLTR VAVFFSNTPTR	LSDAGITPLFLTR VAVFFSNTPTR LSDAGITPLFLTR VAVFFSNTPTR	7	6	4	17	12
COL6A3	Collagen alpha-3(VI) chain	CO6A3_HUMAN	50Step_Domain_p1000.0_to_1050.0	1000	1050	50.0 AA STEP	50	19	19	3	13	3	0.12	1	14	8	DVVFLLDGSEGVR IGDLHPQIVNLLK NADPAELEQIVLSPAFILAAESLPK DVVFLLDGSEGVR IGDLHPQIVNLLK NADPAELEQIVLSPAFILAAESLPK IGDLHPQIVNLLK	DVVFLLDGSEGVR IGDLHPQIVNLLK NADPAELEQIVLSPAFILAAESLPK DVVFLLDGSEGVR	8	12	3	21	5
COL6A3	Collagen alpha-3(VI) chain	CO6A3_HUMAN	50Step_Domain_p2250.0_to_2300.0	2250	2300	50.0 AA STEP	50	2	5	3	4	11	-0.1	1	3	8	GAQGPAGPAGPPGLIGEQGISGPR GAQGPAGPAGPPGLIGEQGISGPR GAQGPAGPAGPPGLIGEQGISGPR	GAQGPAGPAGPPGLIGEQGISGPR GETGDDGRDGVGSEGR DGVGSEGR GAQGPAGPAGPPGLIGEQGISGPR GETGDDGRDGVGSEGR	1	3	3	6	16
COL6A3	Collagen alpha-3(VI) chain	CO6A3_HUMAN	50Step_Domain_p2750.0_to_2800.0	2750	2800	50.0 AA STEP	50	9	11	3	7	7	0.02	1	8	7	EVYTFASEPNDVFFK IVVLMLTGEVPEQQLEEAQR EVYTFASEPNDVFFK IVVLMLTGEVPEQQLEEAQR EVYTFASEPNDVFFK IVVLMLTGEVPEQQLEEAQR	EVYTFASEPNDVFFK IVVLMLTGEVPEQQLEEAQR EVYTFASEPNDVFFK IVVLMLTGEVPEQQLEEAQR	4	7	3	11	10
COL6A3	Collagen alpha-3(VI) chain	CO6A3_HUMAN	50Step_Domain_p250.0_to_300.0	250	300	50.0 AA STEP	50	2	0	1	6	7	-0.1	1	1	6	VGVVQFSDEPR VGVVQFSDEPR	LPIGTQQIR TMFSLDTYSTK VGVVQFSDEPR LPIGTQQIR TMFSLDTYSTK VGVVQFSDEPR	1	0	1	10	11
COL6A3	Collagen alpha-3(VI) chain	CO6A3_HUMAN	50Step_Domain_p2800.0_to_2850.0	2800	2850	50.0 AA STEP	50	9	9	7	7	5	0.04	1	8	6	LLPSFVSSENAFYLSPDIR STELNEEPLMR LLPSFVSSENAFYLSPDIR STELNEEPLMR LLPSFVSSENAFYLSPDIR STELNEEPLMR	LLPSFVSSENAFYLSPDIR STELNEEPLMR LLPSFVSSENAFYLSPDIR STELNEEPLMR	4	6	6	11	8
COL6A3	Collagen alpha-3(VI) chain	CO6A3_HUMAN	50Step_Domain_p2050.0_to_2100.0	2050	2100	50.0 AA STEP	50	5	0	1	6	6	-0.08	1	2	6	GPIGSIGPK GPIGSIGPK	GIPGEDGYR GPIGSIGPK GIPGEDGYR GPIGSIGPK GYPGDEGGPGER	2	0	1	9	9
COL6A3	Collagen alpha-3(VI) chain	CO6A3_HUMAN	50Step_Domain_p1700.0_to_1750.0	1700	1750	50.0 AA STEP	50	7	2	6	6	5	-0.02	1	5	6	QIIDAINK VPQIAFVITGGK VPQIAFVITGGK QIIDAINK	QIIDAINK RQIIDAINK VNHFVPEAGSR VPQIAFVITGGK QIIDAINK VPQIAFVITGGK	3	1	5	10	7
COL6A3	Collagen alpha-3(VI) chain	CO6A3_HUMAN	50Step_Domain_p1650.0_to_1700.0	1650	1700	50.0 AA STEP	50	2	5	2	5	6	-0.06	1	3	6	DSFQEVLR ADIVFLLDGSINFR DSFQEVLR DSFQEVLR	DSFQEVLR RDSFQEVLR RQIIDAINK DSFQEVLR RDSFQEVLR	1	3	2	8	9
COL6A3	Collagen alpha-3(VI) chain	CO6A3_HUMAN	50Step_Domain_p950.0_to_1000.0	950	1000	50.0 AA STEP	50	9	11	0	8	2	0.04	1	7	5	NADPAELEQIVLSPAFILAAESLPK NADPAELEQIVLSPAFILAAESLPK	NADPAELEQIVLSPAFILAAESLPK QSGVVPFIFQAK SSDRVDGPASNLK VDGPASNLK QSGVVPFIFQAK VDGPASNLK	4	7	0	12	3
COL6A3	Collagen alpha-3(VI) chain	CO6A3_HUMAN	50Step_Domain_p2700.0_to_2750.0	2700	2750	50.0 AA STEP	50	9	8	2	6	3	0.04	1	6	4	ALGSAIEYTIENVFESAPNPR IVVLMLTGEVPEQQLEEAQR ALGSAIEYTIENVFESAPNPR IVVLMLTGEVPEQQLEEAQR IVVLMLTGEVPEQQLEEAQR	IVVLMLTGEVPEQQLEEAQR IVVLMLTGEVPEQQLEEAQR	4	5	2	9	4
COL6A3	Collagen alpha-3(VI) chain	CO6A3_HUMAN	50Step_Domain_p1100.0_to_1150.0	1100	1150	50.0 AA STEP	50	2	8	3	4	5	0	1	4	4	ITEGVPQLLIVLTADR ITEGVPQLLIVLTADR QLTLLGGPTPNTGAALEFVLR ITEGVPQLLIVLTADR QLTLLGGPTPNTGAALEFVLR	ITEGVPQLLIVLTADR NILVSSAGSR QLTLLGGPTPNTGAALEFVLR ITEGVPQLLIVLTADR QLTLLGGPTPNTGAALEFVLR	1	5	3	7	8
COL6A3	Collagen alpha-3(VI) chain	CO6A3_HUMAN	50Step_Domain_p1150.0_to_1200.0	1150	1200	50.0 AA STEP	50	7	5	6	3	5	0.04	1	6	4	QLGTVQQVISER QLGTVQQVISER QLGTVQQVISER	QLGTVQQVISER QLGTVQQVISER	3	3	5	5	7
COL6A3	Collagen alpha-3(VI) chain	CO6A3_HUMAN	50Step_Domain_p550.0_to_600.0	550	600	50.0 AA STEP	50	0	9	7	3	5	0.02	1	5	4	GADQAELEEIAFDSSLVFIPAEFR SLDEISQPAQELK LLVLITGGK SLDEISQPAQELK	LLVLITGGK SLDEISQPAQELK LLVLITGGK SLDEISQPAQELK	0	6	6	5	7
COL6A3	Collagen alpha-3(VI) chain	CO6A3_HUMAN	50Step_Domain_p2200.0_to_2250.0	2200	2250	50.0 AA STEP	50	2	5	3	4	4	-0.02	1	3	4	GAQGPAGPAGPPGLIGEQGISGPR GAQGPAGPAGPPGLIGEQGISGPR GAQGPAGPAGPPGLIGEQGISGPR	GAQGPAGPAGPPGLIGEQGISGPR GGPGQPGFEGEQGTR GAQGPAGPAGPPGLIGEQGISGPR	1	3	3	6	6
COL6A3	Collagen alpha-3(VI) chain	CO6A3_HUMAN	50Step_Domain_p1600.0_to_1650.0	1600	1650	50.0 AA STEP	50	2	5	1	5	3	-0.02	1	3	4	ELPNIEER ADIVFLLDGSINFR ELPNIEER ELPNIEER	ELPNIEER ELPNIEER	1	3	1	8	5
COL6A3	Collagen alpha-3(VI) chain	CO6A3_HUMAN	50Step_Domain_p1800.0_to_1850.0	1800	1850	50.0 AA STEP	50	5	0	2	5	3	-0.04	1	2	4	DQNVFVAQK DQNVFVAQK	ACNLDVILGFDGSR DQNVFVAQK ACNLDVILGFDGSR DQNVFVAQK	2	0	2	8	4
COL6A3	Collagen alpha-3(VI) chain	CO6A3_HUMAN	50Step_Domain_p2650.0_to_2700.0	2650	2700	50.0 AA STEP	50	12	6	3	4	2	0.08	1	7	3	QLDMSPDPK VEFSLTDYGSK VAVVQHAPSESVDNASMPPVK VEFSLTDYGSK VEFSLTDYGSK	QLDMSPDPK VAVVQHAPSESVDNASMPPVK VEFSLTDYGSK VEFSLTDYGSK	5	4	3	6	3
COL6A3	Collagen alpha-3(VI) chain	CO6A3_HUMAN	50Step_Domain_p900.0_to_950.0	900	950	50.0 AA STEP	50	7	11	2	3	3	0.08	1	7	3	ALNLGYALDYAQR ALNLGYALDYAQR FDEHQSKPEILNLVK ALNLGYALDYAQR	ALNLGYALDYAQR ALNLGYALDYAQR	3	7	2	4	5
COL6A3	Collagen alpha-3(VI) chain	CO6A3_HUMAN	50Step_Domain_p3000.0_to_3050.0	3000	3050	50.0 AA STEP	50	2	9	2	3	3	0.02	1	4	3	EVQVFEITENSAK AEPPGPYFYDLTVTSAHDQSLVLK EVQVFEITENSAK EVQVFEITENSAK	EVQVFEITENSAK EVQVFEITENSAK	1	6	2	4	5
COL6A3	Collagen alpha-3(VI) chain	CO6A3_HUMAN	50Step_Domain_p2950.0_to_3000.0	2950	3000	50.0 AA STEP	50	2	6	2	3	3	0	1	3	3	EVQVFEITENSAK EVQVFEITENSAK EVQVFEITENSAK	EVQVFEITENSAK EVQVFEITENSAK	1	4	2	4	5
COL6A3	Collagen alpha-3(VI) chain	CO6A3_HUMAN	50Step_Domain_p500.0_to_550.0	500	550	50.0 AA STEP	50	5	8	3	4	1	0.06	1	5	2	NNLFTSSAGYR LEIGQDLIQVAVAQYADTVRPEFYFNTHPTK MKPLDGSALYTGSALDFVR NNLFTSSAGYR MKPLDGSALYTGSALDFVR NNLFTSSAGYR	MKPLDGSALYTGSALDFVR NNLFTSSAGYR REVITAVR NNLFTSSAGYR	2	5	3	7	2
COL6A3	Collagen alpha-3(VI) chain	CO6A3_HUMAN	50Step_Domain_p650.0_to_700.0	650	700	50.0 AA STEP	50	0	3	0	3	2	-0.02	1	1	2	VGLVQFSDTPVTEFSLNTYQTK	SDILGHLR VGLVQFSDTPVTEFSLNTYQTK VGLVQFSDTPVTEFSLNTYQTK	0	2	0	5	3
COL6A3	Collagen alpha-3(VI) chain	CO6A3_HUMAN	50Step_Domain_p600.0_to_650.0	600	650	50.0 AA STEP	50	5	11	2	2	1	0.08	1	6	2	AAPLQGMLPGLLAPLR AAPLQGMLPGLLAPLR GADQAELEEIAFDSSLVFIPAEFR AAPLQGMLPGLLAPLR	AAPLQGMLPGLLAPLR AAPLQGMLPGLLAPLR	2	7	2	3	2
COL6A3	Collagen alpha-3(VI) chain	CO6A3_HUMAN	50Step_Domain_p2600.0_to_2650.0	2600	2650	50.0 AA STEP	50	5	0	0	2	0	0.02	1	2	1	QLDMSPDPK	QLDMSPDPK	2	0	0	3	0
COL6A3	Collagen alpha-3(VI) chain	CO6A3_HUMAN	50Step_Domain_p50.0_to_100.0	50	100	50.0 AA STEP	50	0	2	0	1	1	0	1	1	1	EFLYDVVK	EFLYDVVK EFLYDVVK	0	1	0	2	2
COL9A2	Collagen alpha-2(IX) chain	CO9A2_HUMAN	50Step_Domain_p500.0_to_550.0	500	550	50.0 AA STEP	50	0	0	5	5	5	-0.06	0	2	5	DATDQHIVDVALK MLQEQLAEVAVSAK	DATDQHIVDVALK MLQEQLAEVAVSAK DATDQHIVDVALK MLQEQLAEVAVSAK	0	0	4	10	7
COMP	Cartilage oligomeric matrix protein	COMP_HUMAN	50Step_Domain_p650.0_to_700.0	650	700	50.0 AA STEP	50	149	171	138	158	119	0.3	1	153	138	FYEGPELVADSNVVLDTTMR NALWHTGDTESQVR SSTGPGEQLR FYEGPELVADSNVVLDTTMR NALWHTGDTESQVR FYEGPELVADSNVVLDTTMR NALWHTGDTESQVR SSTGPGEQLR	FYEGPELVADSNVVLDTTMR NALWHTGDTESQVR SSTGPGEQLR FYEGPELVADSNVVLDTTMR NALWHTGDTESQVR SSTGPGEQLR	157	117	181	198	155
COMP	Cartilage oligomeric matrix protein	COMP_HUMAN	50Step_Domain_p700.0_to_750.0	700	750	50.0 AA STEP	50	135	145	119	111	57	0.98	0	133	84	CNDTIPEDYETHQLR FYEGPELVADSNVVLDTTMR LGVFCFSQENIIWANLR YRCNDTIPEDYETHQLR CNDTIPEDYETHQLR FYEGPELVADSNVVLDTTMR CNDTIPEDYETHQLR FYEGPELVADSNVVLDTTMR	CNDTIPEDYETHQLR FYEGPELVADSNVVLDTTMR FYEGPELVADSNVVLDTTMR	142	99	157	139	75
COMP	Cartilage oligomeric matrix protein	COMP_HUMAN	50Step_Domain_p500.0_to_550.0	500	550	50.0 AA STEP	50	49	34	36	30	40	0.1	1	40	35	AFQTVVLDPEGDAQIDPNWVVLNQGR IDVCPENAEVTLTDFR LVPNPGQEDADRDGVGDVCQDDFDADKVVDK VVDKIDVCPENAEVTLTDFR AFQTVVLDPEGDAQIDPNWVVLNQGR IDVCPENAEVTLTDFR AFQTVVLDPEGDAQIDPNWVVLNQGR IDVCPENAEVTLTDFR LVPNPGQEDADRDGVGDVCQDDFDADKVVDK	AFQTVVLDPEGDAQIDPNWVVLNQGR IDVCPENAEVTLTDFR LVPNPGQEDADRDGVGDVCQDDFDADK LVPNPGQEDADRDGVGDVCQDDFDADKVVDK AFQTVVLDPEGDAQIDPNWVVLNQGR DGVGDVCQDDFDADK DGVGDVCQDDFDADKVVDK IDVCPENAEVTLTDFR LVPNPGQEDADRDGVGDVCQDDFDADK LVPNPGQEDADRDGVGDVCQDDFDADKVVDK	52	23	48	38	52
COMP	Cartilage oligomeric matrix protein	COMP_HUMAN	50Step_Domain_p250.0_to_300.0	250	300	50.0 AA STEP	50	15	19	24	27	32	-0.22	1	19	30	DNCVTVPNSGQEDVDR DTDLDGFPDEK DTDLDGFPDEKLR DNCVTVPNSGQEDVDR DTDLDGFPDEK DTDLDGFPDEKLR DNCVTVPNSGQEDVDR DTDLDGFPDEK DTDLDGFPDEKLR	DNCVTVPNSGQEDVDR DTDLDGFPDEK DTDLDGFPDEKLR KDNCVTVPNSGQEDVDR DNCVTVPNSGQEDVDR DTDLDGFPDEK DTDLDGFPDEKLR KDNCVTVPNSGQEDVDR KDNCVTVPNSGQEDVDRDGIGDACDPDADGDGVPNEK	16	13	32	34	42
COMP	Cartilage oligomeric matrix protein	COMP_HUMAN	50Step_Domain_p400.0_to_450.0	400	450	50.0 AA STEP	50	8	0	11	20	35	-0.44	0.2144	6	28	SNPDQADVDHDFVGDACDSDQDQDGDGHQDSR SNPDQADVDHDFVGDACDSDQDQDGDGHQDSR	SNPDQADVDHDFVGDACDSDQDQDGDGHQDSR SNPDQADVDHDFVGDACDSDQDQDGDGHQDSR	8	0	15	25	46
COMP	Cartilage oligomeric matrix protein	COMP_HUMAN	50Step_Domain_p600.0_to_650.0	600	650	50.0 AA STEP	50	21	26	32	19	24	0.08	1	26	22	AVAEPGIQLK QMEQTYWQANPFR SSTGPGEQLR AVAEPGIQLK QMEQTYWQANPFR AVAEPGIQLK QMEQTYWQANPFR SSTGPGEQLR	AVAEPGIQLK QMEQTYWQANPFR SSTGPGEQLR AVAEPGIQLK QMEQTYWQANPFR SSTGPGEQLR	22	18	42	24	31
COMP	Cartilage oligomeric matrix protein	COMP_HUMAN	50Step_Domain_p0_to_50	0	50	50.0 AA STEP	50	26	28	21	16	23	0.1	1	25	20	ELQETNAALQDVR ELQETNAALQDVR ELQETNAALQDVR	ELQETNAALQDVR ELQETNAALQDVR	27	19	27	20	30
COMP	Cartilage oligomeric matrix protein	COMP_HUMAN	50Step_Domain_p450.0_to_500.0	450	500	50.0 AA STEP	50	7	1	10	9	24	-0.2	1	6	16	LVPNPGQEDADR LVPNPGQEDADRDGVGDVCQDDFDADKVVDK LVPNPGQEDADR LVPNPGQEDADR LVPNPGQEDADRDGVGDVCQDDFDADKVVDK	LVPNPGQEDADR LVPNPGQEDADRDGVGDVCQDDFDADK LVPNPGQEDADRDGVGDVCQDDFDADKVVDK DGVGDVCQDDFDADK DGVGDVCQDDFDADKVVDK LVPNPGQEDADR LVPNPGQEDADRDGVGDVCQDDFDADK LVPNPGQEDADRDGVGDVCQDDFDADKVVDK	7	1	13	11	31
COMP	Cartilage oligomeric matrix protein	COMP_HUMAN	50Step_Domain_p550.0_to_600.0	550	600	50.0 AA STEP	50	4	12	9	13	15	-0.12	1	8	14	AFQTVVLDPEGDAQIDPNWVVLNQGR AFQTVVLDPEGDAQIDPNWVVLNQGR AFQTVVLDPEGDAQIDPNWVVLNQGR	AFQTVVLDPEGDAQIDPNWVVLNQGR AFQTVVLDPEGDAQIDPNWVVLNQGR	4	8	12	16	20
COMP	Cartilage oligomeric matrix protein	COMP_HUMAN	50Step_Domain_p350.0_to_400.0	350	400	50.0 AA STEP	50	2	0	2	2	7	-0.06	1	1	4	NDDQKDTDQDGRGDACDDDIDGDR DTDQDGRGDACDDDIDGDR	DTDQDGRGDACDDDIDGDR DTDQDGRGDACDDDIDGDR NDDQKDTDQDGRGDACDDDIDGDR	2	0	2	2	9
COMP	Cartilage oligomeric matrix protein	COMP_HUMAN	50Step_Domain_p300.0_to_350.0	300	350	50.0 AA STEP	50	2	3	2	3	5	-0.04	1	2	4	DGIGDACDPDADGDGVPNEK DNCVTVPNSGQEDVDR DNCVTVPNSGQEDVDR DNCVTVPNSGQEDVDR	DGIGDACDPDADGDGVPNEK DNCVTVPNSGQEDVDR KDNCVTVPNSGQEDVDR DNCVTVPNSGQEDVDR KDNCVTVPNSGQEDVDR KDNCVTVPNSGQEDVDRDGIGDACDPDADGDGVPNEK	2	2	3	4	6
COMP	Cartilage oligomeric matrix protein	COMP_HUMAN	50Step_Domain_p100.0_to_150.0	100	150	50.0 AA STEP	50	1	0	2	1	2	-0.02	1	1	2	CINTSPGFR CINTSPGFR	CINTSPGFR CINTSPGFR	1	0	3	1	2
COMP	Cartilage oligomeric matrix protein	COMP_HUMAN	50Step_Domain_p750.0_to_757.0	750	757	50.0 AA STEP	7	4	1	10	2	0	0.571429	1	5	1	CNDTIPEDYETHQLR YRCNDTIPEDYETHQLR CNDTIPEDYETHQLR CNDTIPEDYETHQLR	CNDTIPEDYETHQLR	4	1	13	2	0
CP	Ceruloplasmin	CERU_HUMAN	50Step_Domain_p550.0_to_600.0	550	600	50.0 AA STEP	50	17	18	15	18	31	-0.14	0.0484	17	24	DIFTGLIGPMK DVDKEFYLFPTVFDENESLLLEDNIR MFTTAPDQVDK MFTTAPDQVDKEDEDFQESNK DIFTGLIGPMK DVDKEFYLFPTVFDENESLLLEDNIR EFYLFPTVFDENESLLLEDNIR MFTTAPDQVDKEDEDFQESNK DIFTGLIGPMK MFTTAPDQVDKEDEDFQESNK	DIFTGLIGPMK MFTTAPDQVDKEDEDFQESNK DIFTGLIGPMK MFTTAPDQVDKEDEDFQESNK	28	25	5	14	25
CP	Ceruloplasmin	CERU_HUMAN	50Step_Domain_p600.0_to_650.0	600	650	50.0 AA STEP	50	14	7	12	10	21	-0.1	1	11	16	MFTTAPDQVDK MFTTAPDQVDKEDEDFQESNK MFTTAPDQVDKEDEDFQESNK MFTTAPDQVDKEDEDFQESNK	MFTTAPDQVDKEDEDFQESNK MFTTAPDQVDKEDEDFQESNK	23	9	4	8	17
CP	Ceruloplasmin	CERU_HUMAN	50Step_Domain_p250.0_to_300.0	250	300	50.0 AA STEP	50	4	1	0	20	11	-0.28	0	2	16	MYSVNGYTFGSLPGLSMCAEDR MYSVNGYTFGSLPGLSMCAEDR WYLFGMGNEVDVHAAFFHGQALTNK	MYSVNGYTFGSLPGLSMCAEDR VDKDNEDFQESNR MYSVNGYTFGSLPGLSMCAEDR VDKDNEDFQESNR	6	2	0	15	9
CP	Ceruloplasmin	CERU_HUMAN	50Step_Domain_p500.0_to_550.0	500	550	50.0 AA STEP	50	18	15	17	12	15	0.06	1	17	14	DIFTGLIGPMK EVGPTNADPVCLAK MYYSAVDPTK SVPPSASHVAPTETFTYEWTVPK DIFTGLIGPMK MYYSAVDPTK SVPPSASHVAPTETFTYEWTVPK DIFTGLIGPMK MYYSAVDPTK	DIFTGLIGPMK MYYSAVDPTK DIFTGLIGPMK MYYSAVDPTK	30	21	6	9	12
CP	Ceruloplasmin	CERU_HUMAN	50Step_Domain_p700.0_to_750.0	700	750	50.0 AA STEP	50	4	4	12	8	12	-0.06	1	7	10	QSEDSTFYLGER QSEDSTFYLGER RQSEDSTFYLGER QSEDSTFYLGER	QSEDSTFYLGER QSEDSTFYLGER	6	5	4	6	10
CP	Ceruloplasmin	CERU_HUMAN	50Step_Domain_p50.0_to_100.0	50	100	50.0 AA STEP	50	7	4	9	7	6	0.02	1	7	6	ALYLQYTDETFR LISVDTEHSNIYLQNGPDR TTIEKPVWLGFLGPIIK ALYLQYTDETFR LISVDTEHSNIYLQNGPDR TTIEKPVWLGFLGPIIK ALYLQYTDETFR	ALYLQYTDETFR LISVDTEHSNIYLQNGPDR ALYLQYTDETFR LISVDTEHSNIYLQNGPDR	12	6	3	5	5
CP	Ceruloplasmin	CERU_HUMAN	50Step_Domain_p450.0_to_500.0	450	500	50.0 AA STEP	50	8	11	12	5	4	0.12	0.4488	10	4	GAYPLSIEPIGVR GPEEEHLGILGPVIWAEVGDTIR NNEGTYYSPNYNPQSR ERGPEEEHLGILGPVIWAEVGDTIR GAYPLSIEPIGVR GPEEEHLGILGPVIWAEVGDTIR NNEGTYYSPNYNPQSR GAYPLSIEPIGVR NNEGTYYSPNYNPQSR	GAYPLSIEPIGVR NNEGTYYSPNYNPQSR GAYPLSIEPIGVR NNEGTYYSPNYNPQSR	13	15	4	4	3
CP	Ceruloplasmin	CERU_HUMAN	50Step_Domain_p750.0_to_800.0	750	800	50.0 AA STEP	50	10	12	12	7	0	0.14	0.0484	11	4	AEEEHLGILGPQLHADVGDK GEFYIGSK QYTDSTFR AEEEHLGILGPQLHADVGDK KAEEEHLGILGPQLHADVGDK AEEEHLGILGPQLHADVGDK	AEEEHLGILGPQLHADVGDK GEFYIGSK	16	16	4	5	0
CP	Ceruloplasmin	CERU_HUMAN	50Step_Domain_p0_to_50	0	50	50.0 AA STEP	50	3	7	0	3	4	-0.02	1	3	4	HYYIGIIETTWDYASDHGEK LISVDTEHSNIYLQNGPDR HYYIGIIETTWDYASDHGEK HYYIGIIETTWDYASDHGEKK LISVDTEHSNIYLQNGPDR	LISVDTEHSNIYLQNGPDR LISVDTEHSNIYLQNGPDR	5	9	0	2	3
CP	Ceruloplasmin	CERU_HUMAN	50Step_Domain_p900.0_to_950.0	900	950	50.0 AA STEP	50	2	4	0	3	4	-0.04	1	2	4	DDEEFIESNK DDEEFIESNK VNKDDEEFIESNK	DDEEFIESNK DDEEFIESNK TYSDHPEK	3	5	0	2	3
CP	Ceruloplasmin	CERU_HUMAN	50Step_Domain_p400.0_to_450.0	400	450	50.0 AA STEP	50	4	8	6	4	2	0.06	1	6	3	EYTDASFTNR GPEEEHLGILGPVIWAEVGDTIR ERGPEEEHLGILGPVIWAEVGDTIR EYTDASFTNR GPEEEHLGILGPVIWAEVGDTIR EYTDASFTNR	EYTDASFTNR EYTDASFTNR	6	11	2	3	2
CP	Ceruloplasmin	CERU_HUMAN	50Step_Domain_p800.0_to_850.0	800	850	50.0 AA STEP	50	8	12	12	5	0	0.18	0.0308	11	2	AEEEHLGILGPQLHADVGDK AEEEHLGILGPQLHADVGDK KAEEEHLGILGPQLHADVGDK AEEEHLGILGPQLHADVGDK	AEEEHLGILGPQLHADVGDK	13	16	4	4	0
CP	Ceruloplasmin	CERU_HUMAN	50Step_Domain_p950.0_to_1000.0	950	1000	50.0 AA STEP	50	2	4	0	3	2	0	1	2	2	DDEEFIESNK DDEEFIESNK VNKDDEEFIESNK	DDEEFIESNK DDEEFIESNK	3	5	0	2	2
CP	Ceruloplasmin	CERU_HUMAN	50Step_Domain_p150.0_to_200.0	150	200	50.0 AA STEP	50	1	2	0	3	0	-0.02	1	1	2	IYHSHIDAPK VYPGEQYTYMLLATEEQSPGEGDGNCVTR	IYHSHIDAPK VYPGEQYTYMLLATEEQSPGEGDGNCVTR	2	3	0	2	0
CP	Ceruloplasmin	CERU_HUMAN	50Step_Domain_p850.0_to_900.0	850	900	50.0 AA STEP	50	1	0	0	1	2	-0.04	1	0	2	SGAGTEDSACIPWAYYSTVDQVK	SGAGTEDSACIPWAYYSTVDQVK SGAGTEDSACIPWAYYSTVDQVK	2	0	0	1	2
CP	Ceruloplasmin	CERU_HUMAN	50Step_Domain_p100.0_to_150.0	100	150	50.0 AA STEP	50	0	2	0	1	0	0.02	1	1	0	VYPGEQYTYMLLATEEQSPGEGDGNCVTR	VYPGEQYTYMLLATEEQSPGEGDGNCVTR	0	3	0	1	0
CRTAC1	Cartilage acidic protein 1	CRAC1_HUMAN	50Step_Domain_p500.0_to_550.0	500	550	50.0 AA STEP	50	6	10	9	16	11	-0.12	0.0028	8	14	DEASSVEVTWPDGK NVASGEMNSVLEILYPR DEASSVEVTWPDGK NVASGEMNSVLEILYPR DEASSVEVTWPDGK NVASGEMNSVLEILYPR	DEASSVEVTWPDGK NVASGEMNSVLEILYPR DEASSVEVTWPDGK	8	17	9	8	4
CRTAC1	Cartilage acidic protein 1	CRAC1_HUMAN	50Step_Domain_p400.0_to_450.0	400	450	50.0 AA STEP	50	4	7	6	14	11	-0.12	0	6	12	EHGDPLIEELNPGDALEPEGR GNQGFNNNWLR EHGDPLIEELNPGDALEPEGR GNQGFNNNWLR GTGGVVTDFDGDGMLDLILSHGESMAQPLSVFR REHGDPLIEELNPGDALEPEGR EHGDPLIEELNPGDALEPEGR GNQGFNNNWLR	EHGDPLIEELNPGDALEPEGR GNQGFNNNWLR EHGDPLIEELNPGDALEPEGR	6	12	6	7	4
CRTAC1	Cartilage acidic protein 1	CRAC1_HUMAN	50Step_Domain_p350.0_to_400.0	350	400	50.0 AA STEP	50	3	5	5	10	11	-0.12	0	4	10	EHGDPLIEELNPGDALEPEGR EHGDPLIEELNPGDALEPEGR REHGDPLIEELNPGDALEPEGR EHGDPLIEELNPGDALEPEGR	EHGDPLIEELNPGDALEPEGR EHGDPLIEELNPGDALEPEGR	4	8	5	5	4
CRTAC1	Cartilage acidic protein 1	CRAC1_HUMAN	50Step_Domain_p150.0_to_200.0	150	200	50.0 AA STEP	50	8	7	9	6	11	0	1	8	8	GVASLFAGR WEDILSDEVNVAR GVASLFAGR WEDILSDEVNVAR YSIYIANYAYGNVGPDALIEMDPEASDLSR GVASLFAGR WEDILSDEVNVAR	GVASLFAGR WEDILSDEVNVAR GVASLFAGR WEDILSDEVNVAR	11	12	9	3	4
CRTAC1	Cartilage acidic protein 1	CRAC1_HUMAN	50Step_Domain_p450.0_to_500.0	450	500	50.0 AA STEP	50	4	5	4	6	11	-0.08	0.0238	4	8	DEASSVEVTWPDGK DEASSVEVTWPDGK DEASSVEVTWPDGK	DEASSVEVTWPDGK DEASSVEVTWPDGK	6	8	4	3	4
CRTAC1	Cartilage acidic protein 1	CRAC1_HUMAN	50Step_Domain_p300.0_to_350.0	300	350	50.0 AA STEP	50	7	5	4	2	3	0.06	0.3906	5	2	FSMPSPVR GVALADFNR LYLQMSTHGK FSMPSPVR GVALADFNR VDIVYGNWNGPHR FSMPSPVR GVALADFNR	FSMPSPVR GVALADFNR	10	8	4	1	1
CRTAC1	Cartilage acidic protein 1	CRAC1_HUMAN	50Step_Domain_p50.0_to_100.0	50	100	50.0 AA STEP	50	4	4	6	2	3	0.06	1	5	2	LVNIAVDER LVNIAVDER LVNIAVDER	LVNIAVDER LVNIAVDER	6	6	6	1	1
CRTAC1	Cartilage acidic protein 1	CRAC1_HUMAN	50Step_Domain_p250.0_to_300.0	250	300	50.0 AA STEP	50	7	5	5	0	3	0.08	0.0238	6	2	GDGTFVDAAASAGVDDPHQHGR GVALADFNR GDGTFVDAAASAGVDDPHQHGR GVALADFNR GDGTFVDAAASAGVDDPHQHGR GVALADFNR	GVALADFNR	10	9	5	0	1
CSPG2	Chondroitin sulfate proteoglycan 2 (Versican); isoform CRA_b	A0A024RAQ9_HUMAN	50Step_Domain_p100.0_to_150.0	100	150	50.0 AA STEP	50	64	48	64	59	48	0.1	1	59	54	CDVMYGIEDTQDTVSLTVDGVVFHYR LLASDAGLYR VSVPTHPEAVGDASLTVVK LLASDAGLYR VSVPTHPEAVGDASLTVVK CDVMYGIEDTQDTVSLTVDGVVFHYR LLASDAGLYR VSVPTHPEAVGDASLTVVK	LLASDAGLYR VSVPTHPEAVGDASLTVVK LLASDAGLYR VSVPTHPEAVGDASLTVVK	19	13	42	102	73
CSPG2	Chondroitin sulfate proteoglycan 2 (Versican); isoform CRA_b	A0A024RAQ9_HUMAN	50Step_Domain_p250.0_to_300.0	250	300	50.0 AA STEP	50	70	67	47	38	43	0.42	0	61	40	FTFEEAAK LATVGELQAAWR NGFDQCDYGWLSDASVR FTFEEAAK LATVGELQAAWR NGFDQCDYGWLSDASVR SPQETYDVYCYVDHLDGDVFHLTVPSK FTFEEAAK LATVGELQAAWR NGFDQCDYGWLSDASVR SPQETYDVYCYVDHLDGDVFHLTVPSK	FTFEEAAK FTFEEAAKECENQDAR LATVGELQAAWR NGFDQCDYGWLSDASVR FTFEEAAK LATVGELQAAWR NGFDQCDYGWLSDASVR	21	18	31	66	65
CSPG2	Chondroitin sulfate proteoglycan 2 (Versican); isoform CRA_b	A0A024RAQ9_HUMAN	50Step_Domain_p1300.0_to_1350.0	1300	1350	50.0 AA STEP	50	0	4	12	29	37	-0.56	0	5	33	MSDLSVIGHPIDSESK MSDLSVIGHPIDSESK	MSDLSVIGHPIDSESK MSDLSVIGHPIDSESK	0	1	8	51	56
CSPG2	Chondroitin sulfate proteoglycan 2 (Versican); isoform CRA_b	A0A024RAQ9_HUMAN	50Step_Domain_p1350.0_to_1400.0	1350	1400	50.0 AA STEP	50	0	4	12	29	37	-0.56	0	5	33	MSDLSVIGHPIDSESK MSDLSVIGHPIDSESK	MSDLSVIGHPIDSESK MSDLSVIGHPIDSESK	0	1	8	51	56
CSPG2	Chondroitin sulfate proteoglycan 2 (Versican); isoform CRA_b	A0A024RAQ9_HUMAN	50Step_Domain_p300.0_to_350.0	300	350	50.0 AA STEP	50	30	33	15	17	17	0.18	0.0612	26	17	NGFDQCDYGWLSDASVR NGFDQCDYGWLSDASVR NGFDQCDYGWLSDASVR	AQCGGGLLGVR FENQTGFPPPDSR NGFDQCDYGWLSDASVR AQCGGGLLGVR FENQTGFPPPDSR NGFDQCDYGWLSDASVR	9	9	10	29	26
CSPG2	Chondroitin sulfate proteoglycan 2 (Versican); isoform CRA_b	A0A024RAQ9_HUMAN	50Step_Domain_p150.0_to_200.0	150	200	50.0 AA STEP	50	30	11	21	13	13	0.16	0.2992	21	13	CDVMYGIEDTQDTVSLTVDGVVFHYR YTLNFEAAQK YTLNFEAAQK CDVMYGIEDTQDTVSLTVDGVVFHYR YTLNFEAAQK	YTLNFEAAQK YTLNFEAAQK	9	3	14	22	20
CSPG2	Chondroitin sulfate proteoglycan 2 (Versican); isoform CRA_b	A0A024RAQ9_HUMAN	50Step_Domain_p2100.0_to_2150.0	2100	2150	50.0 AA STEP	50	3	7	6	15	9	-0.14	0.884	5	12	QEIESETTSEEQIQEEK QEVNPVRQEIESETTSEEQIQEEK QEIESETTSEEQIQEEK QEVNPVRQEIESETTSEEQIQEEK	QEIESETTSEEQIQEEK QEVNPVRQEIESETTSEEQIQEEK QEIESETTSEEQIQEEK	1	2	4	26	14
CSPG2	Chondroitin sulfate proteoglycan 2 (Versican); isoform CRA_b	A0A024RAQ9_HUMAN	50Step_Domain_p3200.0_to_3250.0	3200	3250	50.0 AA STEP	50	10	26	17	5	6	0.24	0	18	6	LQGAHLTSILSHEEQMFVNR VGHDYQWIGLNDK LQGAHLTSILSHEEQMFVNR VGHDYQWIGLNDK	VGHDYQWIGLNDK VGHDYQWIGLNDK	3	7	11	8	9
CSPG2	Chondroitin sulfate proteoglycan 2 (Versican); isoform CRA_b	A0A024RAQ9_HUMAN	50Step_Domain_p1900.0_to_1950.0	1900	1950	50.0 AA STEP	50	3	7	2	5	5	-0.02	1	4	5	LGEPNYGAEIR LGEPNYGAEIR LGEPNYGAEIR	LGEPNYGAEIR LGEPNYGAEIR	1	2	1	8	8
CSPG2	Chondroitin sulfate proteoglycan 2 (Versican); isoform CRA_b	A0A024RAQ9_HUMAN	50Step_Domain_p600.0_to_650.0	600	650	50.0 AA STEP	50	0	0	3	3	3	-0.04	1	1	3	ITEEFLGK	ITEEFLGK ITEEFLGK	0	0	2	5	5
CSPG2	Chondroitin sulfate proteoglycan 2 (Versican); isoform CRA_b	A0A024RAQ9_HUMAN	50Step_Domain_p3300.0_to_3350.0	3300	3350	50.0 AA STEP	50	3	4	3	2	2	0.02	1	3	2	YEINSLIR YEINSLIR YEINSLIR	YEINSLIR YEINSLIR	1	1	2	4	3
CSPG2	Chondroitin sulfate proteoglycan 2 (Versican); isoform CRA_b	A0A024RAQ9_HUMAN	50Step_Domain_p700.0_to_750.0	700	750	50.0 AA STEP	50	0	0	2	2	2	-0.02	1	1	2	TEEEVFSGMK	TEEEVFSGMK TEEEVFSGMK	0	0	1	4	3
CSPG2	Chondroitin sulfate proteoglycan 2 (Versican); isoform CRA_b	A0A024RAQ9_HUMAN	50Step_Domain_p3100.0_to_3150.0	3100	3150	50.0 AA STEP	50	0	0	2	1	1	0	1	1	1	NGATCVDGFNTFR	NGATCVDGFNTFR NGATCVDGFNTFR	0	0	1	1	1
CTGF	Connective tissue growth factor	Q5M8T4_HUMAN	50Step_Domain_p150.0_to_200.0	150	200	50.0 AA STEP	50	1	0	0	2	1	-0.04	0.0091	0	2	LEDTFGPDPTMIR	DQTVVGPALAAYR LEDTFGPDPTMIR LEDTFGPDPTMIR	1	0	0	3	2
CTGF	Connective tissue growth factor	Q5M8T4_HUMAN	50Step_Domain_p250.0_to_300.0	250	300	50.0 AA STEP	50	1	0	0	1	1	-0.02	0.3248	0	1	TTTLPVEFK	TTTLPVEFK TTTLPVEFK	2	0	0	1	1
CTGF	Connective tissue growth factor	Q5M8T4_HUMAN	50Step_Domain_p300.0_to_349.0	300	349	50.0 AA STEP	49	1	0	0	1	1	-0.0204082	0.3248	0	1	TTTLPVEFK	TTTLPVEFK TTTLPVEFK	2	0	0	1	1
DKFZp686C11235	Uncharacterized protein DKFZp686C11235	Q6MZV7_HUMAN	50Step_Domain_p400.0_to_450.0	400	450	50.0 AA STEP	50	24	20	17	38	44	-0.42	0.001	20	41	GFYPSDIAVEWESNGQPENNYK TTPPVLDSDGSFFLYSK GFYPSDIAVEWESNGQPENNYK TTPPVLDSDGSFFLYSK WQQGNVFSCSVMHEALHNHYTQK GFYPSDIAVEWESNGQPENNYK TTPPVLDSDGSFFLYSK	TTPPVLDSDGSFFLYSK TTPPVLDSDGSFFLYSK	47	28	18	1	13
DKFZp686C11235	Uncharacterized protein DKFZp686C11235	Q6MZV7_HUMAN	50Step_Domain_p350.0_to_400.0	350	400	50.0 AA STEP	50	30	30	21	38	13	0.02	1	27	26	ALPAPIEK EPQVYTLPPSR EPQVYTLPPSREEMTK GFYPSDIAVEWESNGQPENNYK NQVSLTCLVK ALPAPIEK EPQVYTLPPSR EPQVYTLPPSREEMTK GFYPSDIAVEWESNGQPENNYK ALPAPIEK EPQVYTLPPSR EPQVYTLPPSREEMTK GFYPSDIAVEWESNGQPENNYK	ALPAPIEK ALPAPIEK EPQVYTLPPSR	60	42	22	1	4
DKFZp686C11235	Uncharacterized protein DKFZp686C11235	Q6MZV7_HUMAN	50Step_Domain_p300.0_to_350.0	300	350	50.0 AA STEP	50	21	24	38	0	20	0.36	0.007	28	10	FNWYVDGVEVHNAK VVSVLTVLHQDWLNGK FNWYVDGVEVHNAK VVSVLTVLHQDWLNGK FNWYVDGVEVHNAK	FNWYVDGVEVHNAK VVSVLTVLHQDWLNGK	41	33	40	0	6
DPT	Dermatopontin	DERM_HUMAN	50Step_Domain_p100.0_to_150.0	100	150	50.0 AA STEP	50	6	7	6	7	6	0	1	6	6	YFESVLDR AGMEWYQTCSNNGLVAGFQSR YFESVLDR AGMEWYQTCSNNGLVAGFQSR YFESVLDR	AGMEWYQTCSNNGLVAGFQSR YFESVLDR AGMEWYQTCSNNGLVAGFQSR YFESVLDR	2	7	7	11	8
DPT	Dermatopontin	DERM_HUMAN	50Step_Domain_p50.0_to_100.0	50	100	50.0 AA STEP	50	0	5	4	6	4	-0.04	0.3305	3	5	AGMEWYQTCSNNGLVAGFQSR AGMEWYQTCSNNGLVAGFQSR	AGMEWYQTCSNNGLVAGFQSR QGFSYQCPQGQVIVAVR AGMEWYQTCSNNGLVAGFQSR QGFSYQCPQGQVIVAVR	0	5	5	10	5
DPT	Dermatopontin	DERM_HUMAN	50Step_Domain_p150.0_to_200.0	150	200	50.0 AA STEP	50	3	3	4	2	3	0.02	1	3	2	GATTTFSAVER GATTTFSAVER GATTTFSAVER	GATTTFSAVER GATTTFSAVER	1	3	5	4	4
EHD2	EH domain-containing protein 2	EHD2_HUMAN	50Step_Domain_p200.0_to_250.0	200	250	50.0 AA STEP	50	0	3	0	2	2	-0.02	1	1	2	LEISDEFSEAIGALR	ADMVETQQLMR LEISDEFSEAIGALR VVGTPEVLR ADMVETQQLMR	0	2	0	4	1
EHD2	EH domain-containing protein 2	EHD2_HUMAN	50Step_Domain_p150.0_to_200.0	150	200	50.0 AA STEP	50	0	3	0	1	2	-0.02	1	1	2	LEISDEFSEAIGALR	LEISDEFSEAIGALR GYDFPAVLR	0	2	0	2	1
EHD2	EH domain-containing protein 2	EHD2_HUMAN	50Step_Domain_p500.0_to_543.0	500	543	50.0 AA STEP	43	0	2	0	1	0	0.0232558	1	1	0	LEGHGLPANLPR	LEGHGLPANLPR	0	1	0	1	0
ENO1	Alpha-enolase	ENOA_HUMAN	50Step_Domain_p0_to_50	0	50	50.0 AA STEP	50	15	9	8	8	10	0.04	1	11	9	AAVPSGASTGIYEALELR GNPTVEVDLFTSK AAVPSGASTGIYEALELR GNPTVEVDLFTSK AAVPSGASTGIYEALELR GNPTVEVDLFTSK	AAVPSGASTGIYEALELR GNPTVEVDLFTSK AAVPSGASTGIYEALELR GNPTVEVDLFTSK	10	7	8	10	11
ENO1	Alpha-enolase	ENOA_HUMAN	50Step_Domain_p250.0_to_300.0	250	300	50.0 AA STEP	50	15	21	14	12	5	0.18	0.0036	17	8	DYPVVSIEDPFDQDDWGAWQK VVIGMDVAASEFFR YISPDQLADLYK DYPVVSIEDPFDQDDWGAWQK VVIGMDVAASEFFR YISPDQLADLYK DYPVVSIEDPFDQDDWGAWQK VVIGMDVAASEFFR YISPDQLADLYK	DYPVVSIEDPFDQDDWGAWQK VVIGMDVAASEFFR YISPDQLADLYK DYPVVSIEDPFDQDDWGAWQK YISPDQLADLYK	10	16	14	16	6
ENO1	Alpha-enolase	ENOA_HUMAN	50Step_Domain_p50.0_to_100.0	50	100	50.0 AA STEP	50	3	3	5	6	9	-0.08	0.6444	4	8	TIAPALVSK LMIEMDGTENK TIAPALVSK LMIEMDGTENK TIAPALVSK	LMIEMDGTENK LNVTEQEK TIAPALVSK LMIEMDGTENK LNVTEQEK TIAPALVSK	2	2	5	8	10
ENO1	Alpha-enolase	ENOA_HUMAN	50Step_Domain_p300.0_to_350.0	300	350	50.0 AA STEP	50	3	8	8	8	5	0	1	6	6	DYPVVSIEDPFDQDDWGAWQK DYPVVSIEDPFDQDDWGAWQK FTASAGIQVVGDDLTVTNPK DYPVVSIEDPFDQDDWGAWQK FTASAGIQVVGDDLTVTNPK	DYPVVSIEDPFDQDDWGAWQK FTASAGIQVVGDDLTVTNPK DYPVVSIEDPFDQDDWGAWQK FTASAGIQVVGDDLTVTNPK	2	6	8	10	6
ENO1	Alpha-enolase	ENOA_HUMAN	50Step_Domain_p200.0_to_250.0	200	250	50.0 AA STEP	50	6	10	8	8	4	0.04	1	8	6	DATNVGDEGGFAPNILENK VVIGMDVAASEFFR DATNVGDEGGFAPNILENK VVIGMDVAASEFFR DATNVGDEGGFAPNILENK VVIGMDVAASEFFR	DATNVGDEGGFAPNILENK VVIGMDVAASEFFR DATNVGDEGGFAPNILENK	4	8	8	10	5
ENO1	Alpha-enolase	ENOA_HUMAN	50Step_Domain_p150.0_to_200.0	150	200	50.0 AA STEP	50	4	4	4	5	4	0	1	4	4	IGAEVYHNLK LAMQEFMILPVGAANFR IGAEVYHNLK LAMQEFMILPVGAANFR IGAEVYHNLK LAMQEFMILPVGAANFR	IGAEVYHNLK LAMQEFMILPVGAANFR LAMQEFMILPVGAANFR	3	3	4	7	5
ENO1	Alpha-enolase	ENOA_HUMAN	50Step_Domain_p100.0_to_150.0	100	150	50.0 AA STEP	50	0	1	3	4	4	-0.06	1	1	4	LMIEMDGTENK LMIEMDGTENK	LMIEMDGTENK LMIEMDGTENK	0	1	3	5	4
ERP70	Protein disulfide-isomerase A4	A0A090N8Y2_HUMAN	50Step_Domain_p450.0_to_500.0	450	500	50.0 AA STEP	50	0	0	1	1	3	-0.04	0.0247	0	2	FAMEPEEFDSDTLR	FAMEPEEFDSDTLR DLGLSESGEDVNAAILDESGK FAMEPEEFDSDTLR	0	0	2	1	2
ERP70	Protein disulfide-isomerase A4	A0A090N8Y2_HUMAN	50Step_Domain_p200.0_to_250.0	200	250	50.0 AA STEP	50	0	2	1	2	0	0	1	1	1	VDATAETDLAK VDATAETDLAK	FDVSGYPTLK VDATAETDLAK	0	1	1	2	0
ERP70	Protein disulfide-isomerase A4	A0A090N8Y2_HUMAN	50Step_Domain_p550.0_to_600.0	550	600	50.0 AA STEP	50	0	0	1	1	0	0	1	0	0	MDATANDVPSDR	MDATANDVPSDR	0	0	1	1	0
FBLN1	Fibulin-1	FBLN1_HUMAN	50Step_Domain_p150.0_to_200.0	150	200	50.0 AA STEP	50	3	3	2	0	10	-0.04	0.7815	3	5	IIEVEEEQEDPYLNDR SQETGDLDVGGLQETDK IIEVEEEQEDPYLNDR SQETGDLDVGGLQETDK SQETGDLDVGGLQETDK	IIEVEEEQEDPYLNDR SQETGDLDVGGLQETDK	4	5	1	0	2
FBLN1	Fibulin-1	FBLN1_HUMAN	50Step_Domain_p100.0_to_150.0	100	150	50.0 AA STEP	50	1	2	2	0	5	0	1	2	2	SQETGDLDVGGLQETDK SQETGDLDVGGLQETDK SQETGDLDVGGLQETDK	SQETGDLDVGGLQETDK	2	3	1	0	1
FBN1	Fibrillin-1	FBN1_HUMAN	50Step_Domain_p1500.0_to_1550.0	1500	1550	50.0 AA STEP	50	2	5	5	5	4	0	1	4	4	GDNGDTACSNEIGVGVSK GDNGDTACSNEIGVGVSK GDNGDTACSNEIGVGVSK	GDNGDTACSNEIGVGVSK GDNGDTACSNEIGVGVSK	1	4	3	8	5
FBN1	Fibrillin-1	FBN1_HUMAN	50Step_Domain_p1550.0_to_1600.0	1550	1600	50.0 AA STEP	50	2	5	5	5	4	0	1	4	4	GDNGDTACSNEIGVGVSK GDNGDTACSNEIGVGVSK GDNGDTACSNEIGVGVSK	GDNGDTACSNEIGVGVSK GDNGDTACSNEIGVGVSK	1	4	3	8	5
FBN1	Fibrillin-1	FBN1_HUMAN	50Step_Domain_p2450.0_to_2500.0	2450	2500	50.0 AA STEP	50	2	0	0	1	2	-0.02	1	1	2	GYILQEDGR	GYILQEDGR GYILQEDGR	1	0	0	2	2
FBN1	Fibrillin-1	FBN1_HUMAN	50Step_Domain_p2850.0_to_2871.0	2850	2871	50.0 AA STEP	21	0	0	2	0	1	0.047619	1	1	0	DYLSGELGDNLK	DYLSGELGDNLK	0	0	1	0	1
FLT1	Vascular endothelial growth factor receptor 1	VGFR1_HUMAN	50Step_Domain_p400.0_to_450.0	400	450	50.0 AA STEP	50	1	2	2	0	1	0.04	0	2	0	AVSSFPDPALYPLGSR AVSSFPDPALYPLGSR AVSSFPDPALYPLGSR	AVSSFPDPALYPLGSR	2	2	3	0	1
FLT1	Vascular endothelial growth factor receptor 1	VGFR1_HUMAN	50Step_Domain_p100.0_to_150.0	100	150	50.0 AA STEP	50	0	0	1	0	1	0	1	0	0	YLAVPTSK	YLAVPTSK	0	0	1	0	1
FMOD	Fibromodulin	FMOD_HUMAN	50Step_Domain_p150.0_to_200.0	150	200	50.0 AA STEP	50	43	2	46	93	101	-1.34	0	30	97	ELHLDHNQISR LYLDHNNLTR ELHLDHNQISR ELHLDHNQISR LYLDHNNLTR	ELHLDHNQISR LYLDHNNLTR ELHLDHNQISR LYLDHNNLTR	14	1	44	97	170
FMOD	Fibromodulin	FMOD_HUMAN	50Step_Domain_p300.0_to_350.0	300	350	50.0 AA STEP	50	56	41	16	16	17	0.44	0.776	38	16	INEFSISSFCTVVDVVNFSK IPPVNTNLENLYLQGNR INEFSISSFCTVVDVVNFSK IPPVNTNLENLYLQGNR INEFSISSFCTVVDVVNFSK IPPVNTNLENLYLQGNR	INEFSISSFCTVVDVVNFSK IPPVNTNLENLYLQGNR LDGNEIKR IPPVNTNLENLYLQGNR LDGNEIKR	18	21	15	17	28
FMOD	Fibromodulin	FMOD_HUMAN	50Step_Domain_p50.0_to_100.0	50	100	50.0 AA STEP	50	6	12	7	11	5	0	1	8	8	YLPFVPSR YLPFVPSR YLPFVPSR	YLPFVPSR YLPFVPSR	2	6	7	12	8
FMOD	Fibromodulin	FMOD_HUMAN	50Step_Domain_p100.0_to_150.0	100	150	50.0 AA STEP	50	6	12	7	11	5	0	1	8	8	YLPFVPSR YLPFVPSR YLPFVPSR	YLPFVPSR YLPFVPSR	2	6	7	12	8
FMOD	Fibromodulin	FMOD_HUMAN	50Step_Domain_p350.0_to_376.0	350	376	50.0 AA STEP	26	3	2	1	3	2	0	1	2	2	SAMPADAPLCLR SAMPADAPLCLR SAMPADAPLCLR	LDGNEIKR SAMPADAPLCLR LDGNEIKR SAMPADAPLCLR	1	1	1	3	4
FMOD	Fibromodulin	FMOD_HUMAN	50Step_Domain_p200.0_to_250.0	200	250	50.0 AA STEP	50	15	67	54	1	0	0.9	0.0096	45	0	SLILLDLSYNHLR VPDGLPSALEQLYMEHNNVYTVPDSYFR KVPDGLPSALEQLYMEHNNVYTVPDSYFR SLILLDLSYNHLR VPDGLPSALEQLYMEHNNVYTVPDSYFR SLILLDLSYNHLR VPDGLPSALEQLYMEHNNVYTVPDSYFR	VPDGLPSALEQLYMEHNNVYTVPDSYFR	5	34	52	1	0
FMOD	Fibromodulin	FMOD_HUMAN	50Step_Domain_p250.0_to_300.0	250	300	50.0 AA STEP	50	3	41	21	1	0	0.44	0.776	22	0	VPDGLPSALEQLYMEHNNVYTVPDSYFR KVPDGLPSALEQLYMEHNNVYTVPDSYFR VPDGLPSALEQLYMEHNNVYTVPDSYFR VPDGLPSALEQLYMEHNNVYTVPDSYFR	VPDGLPSALEQLYMEHNNVYTVPDSYFR	1	21	20	1	0
FN1	Fibronectin	A0A024R462_HUMAN	50Step_Domain_p1250.0_to_1300.0	1250	1300	50.0 AA STEP	50	139	169	152	192	190	-0.76	1	153	191	DDKESVPISDTIIPAVPPPTDLR ESVPISDTIIPAVPPPTDLR FTNIGPDTMR VTWAPPPSIDLTNFLVR DDKESVPISDTIIPAVPPPTDLR ESVPISDTIIPAVPPPTDLR FTNIGPDTMR VTWAPPPSIDLTNFLVR DDKESVPISDTIIPAVPPPTDLR ESVPISDTIIPAVPPPTDLR FTNIGPDTMR VTWAPPPSIDLTNFLVR	DDKESVPISDTIIPAVPPPTDLR ESVPISDTIIPAVPPPTDLR FTNIGPDTMR VTWAPPPSIDLTNFLVR DDKESVPISDTIIPAVPPPTDLR ESVPISDTIIPAVPPPTDLR FTNIGPDTMR VTWAPPPSIDLTNFLVR	177	158	212	162	115
FN1	Fibronectin	A0A024R462_HUMAN	50Step_Domain_p1500.0_to_1550.0	1500	1550	50.0 AA STEP	50	131	91	227	174	201	-0.76	1	150	188	GDSPASSKPISINYR STATISGLKPGVDYTITVYAVTGR TEIDKPSQMQVTDVQDNSISVK GDSPASSKPISINYR STATISGLKPGVDYTITVYAVTGR TEIDKPSQMQVTDVQDNSISVK GDSPASSKPISINYR STATISGLKPGVDYTITVYAVTGR TEIDKPSQMQVTDVQDNSISVK	GDSPASSKPISINYR STATISGLKPGVDYTITVYAVTGR TEIDKPSQMQVTDVQDNSISVK GDSPASSKPISINYR STATISGLKPGVDYTITVYAVTGR TEIDKPSQMQVTDVQDNSISVK	167	85	316	147	122
FN1	Fibronectin	A0A024R462_HUMAN	50Step_Domain_p1550.0_to_1600.0	1550	1600	50.0 AA STEP	50	117	82	174	161	183	-0.96	0.216	124	172	TEIDKPSQMQVTDVQDNSISVK WLPSSSPVTGYR TEIDKPSQMQVTDVQDNSISVK WLPSSSPVTGYR TEIDKPSQMQVTDVQDNSISVK WLPSSSPVTGYR	TEIDKPSQMQVTDVQDNSISVK WLPSSSPVTGYR TEIDKPSQMQVTDVQDNSISVK WLPSSSPVTGYR	149	77	242	136	111
FN1	Fibronectin	A0A024R462_HUMAN	50Step_Domain_p900.0_to_950.0	900	950	50.0 AA STEP	50	217	191	212	167	171	0.76	1	207	169	DLQFVEVTDVK SDTVPSPR SDTVPSPRDLQFVEVTDVK VDVIPVNLPGEHGQR VTIMWTPPESAVTGYR DLQFVEVTDVK SDTVPSPRDLQFVEVTDVK VDVIPVNLPGEHGQR VTIMWTPPESAVTGYR DLQFVEVTDVK SDTVPSPR SDTVPSPRDLQFVEVTDVK VDVIPVNLPGEHGQR VTIMWTPPESAVTGYR	DLQFVEVTDVK SDTVPSPR VDVIPVNLPGEHGQR VTIMWTPPESAVTGYR DLQFVEVTDVK SDTVPSPR VDVIPVNLPGEHGQR VTIMWTPPESAVTGYR	276	179	296	141	104
FN1	Fibronectin	A0A024R462_HUMAN	50Step_Domain_p1750.0_to_1800.0	1750	1800	50.0 AA STEP	50	135	177	133	186	138	-0.28	1	148	162	DTLTSRPAQGVVTTLENVSPPR EINLAPDSSSVVVSGLMVATK FTQVTPTSLSAQWTPPNVQLTGYR YEVSVYALK DTLTSRPAQGVVTTLENVSPPR EINLAPDSSSVVVSGLMVATK FTQVTPTSLSAQWTPPNVQLTGYR YEVSVYALK DTLTSRPAQGVVTTLENVSPPR EINLAPDSSSVVVSGLMVATK FTQVTPTSLSAQWTPPNVQLTGYR YEVSVYALK	DTLTSRPAQGVVTTLENVSPPR EINLAPDSSSVVVSGLMVATK FTQVTPTSLSAQWTPPNVQLTGYR YEVSVYALK DTLTSRPAQGVVTTLENVSPPR EINLAPDSSSVVVSGLMVATK FTQVTPTSLSAQWTPPNVQLTGYR YEVSVYALK	172	166	186	157	84
FN1	Fibronectin	A0A024R462_HUMAN	50Step_Domain_p1850.0_to_1900.0	1850	1900	50.0 AA STEP	50	105	97	144	148	143	-0.62	1	115	146	IYLYTLNDNAR SSPVVIDASTAIDAPSNLR SYTITGLQPGTDYK TETITGFQVDAVPANGQTPIQR IYLYTLNDNAR SSPVVIDASTAIDAPSNLR SYTITGLQPGTDYK TETITGFQVDAVPANGQTPIQR IYLYTLNDNAR SSPVVIDASTAIDAPSNLR SYTITGLQPGTDYK TETITGFQVDAVPANGQTPIQR	IYLYTLNDNAR SSPVVIDASTAIDAPSNLR SYTITGLQPGTDYK TETITGFQVDAVPANGQTPIQR IYLYTLNDNAR SSPVVIDASTAIDAPSNLR SYTITGLQPGTDYK TETITGFQVDAVPANGQTPIQR	133	91	200	125	87
FN1	Fibronectin	A0A024R462_HUMAN	50Step_Domain_p950.0_to_1000.0	950	1000	50.0 AA STEP	50	60	72	85	102	122	-0.8	0.8448	72	112	ESKPLTAQQTTK LDAPTNLQFVNETDSTVLVR NTFAEVTGLSPGVTYYFK VDVIPVNLPGEHGQR VFAVSHGR NTFAEVTGLSPGVTYYFK VDVIPVNLPGEHGQR VFAVSHGR ESKPLTAQQTTK LDAPTNLQFVNETDSTVLVR NTFAEVTGLSPGVTYYFK VDVIPVNLPGEHGQR	ESKPLTAQQTTK LDAPTNLQFVNETDSTVLVR NTFAEVTGLSPGVTYYFK VDVIPVNLPGEHGQR VFAVSHGR ESKPLTAQQTTK LDAPTNLQFVNETDSTVLVR NTFAEVTGLSPGVTYYFK VDVIPVNLPGEHGQR VFAVSHGR	76	67	119	86	74
FN1	Fibronectin	A0A024R462_HUMAN	50Step_Domain_p1450.0_to_1500.0	1450	1500	50.0 AA STEP	50	81	134	103	111	96	0.04	1	106	104	DLEVVAATPTSLLISWDAPAVTVR EESPLLIGQQSTVSDVPR ITYGETGGNSPVQEFTVPGSK DLEVVAATPTSLLISWDAPAVTVR EESPLLIGQQSTVSDVPR EESPLLIGQQSTVSDVPRDLEVVAATPTSLLISWDAPAVTVR ITYGETGGNSPVQEFTVPGSK DLEVVAATPTSLLISWDAPAVTVR EESPLLIGQQSTVSDVPR ITYGETGGNSPVQEFTVPGSK	DLEVVAATPTSLLISWDAPAVTVR EESPLLIGQQSTVSDVPR ITYGETGGNSPVQEFTVPGSK DLEVVAATPTSLLISWDAPAVTVR EESPLLIGQQSTVSDVPR ITYGETGGNSPVQEFTVPGSK	103	125	143	94	58
FN1	Fibronectin	A0A024R462_HUMAN	50Step_Domain_p1900.0_to_1950.0	1900	1950	50.0 AA STEP	50	71	66	103	82	81	-0.04	1	80	82	FLATTPNSLLVSWQPPR SSPVVIDASTAIDAPSNLR FLATTPNSLLVSWQPPR SSPVVIDASTAIDAPSNLR YEKPGSPPR FLATTPNSLLVSWQPPR SSPVVIDASTAIDAPSNLR	FLATTPNSLLVSWQPPR SSPVVIDASTAIDAPSNLR FLATTPNSLLVSWQPPR SSPVVIDASTAIDAPSNLR	90	62	143	69	49
FN1	Fibronectin	A0A024R462_HUMAN	50Step_Domain_p250.0_to_300.0	250	300	50.0 AA STEP	50	62	38	61	58	99	-0.48	1	54	78	AAVYQPQPHPQPPPYGHCVTDSGVVYSVGMQWLK GNLLQCICTGNGR HTSVQTTSSGSGPFTDVR AAVYQPQPHPQPPPYGHCVTDSGVVYSVGMQWLK GNLLQCICTGNGR GNLLQCICTGNGRGEWK HTSVQTTSSGSGPFTDVR AAVYQPQPHPQPPPYGHCVTDSGVVYSVGMQWLK GNLLQCICTGNGR HTSVQTTSSGSGPFTDVR	GNLLQCICTGNGR HTSVQTTSSGSGPFTDVR AAVYQPQPHPQPPPYGHCVTDSGVVYSVGMQWLK GNLLQCICTGNGR HTSVQTTSSGSGPFTDVR	79	36	85	49	60
FN1	Fibronectin	A0A024R462_HUMAN	50Step_Domain_p750.0_to_800.0	750	800	50.0 AA STEP	50	78	81	55	76	74	-0.08	1	71	75	VEYELSEEGDEPQYLDLPSTATSVNIPDLLPGR VEYELSEEGDEPQYLDLPSTATSVNIPDLLPGRK YIVNVYQISEDGEQSLILSTSQTTAPDAPPDPTVDQVDDTSIVVR VEYELSEEGDEPQYLDLPSTATSVNIPDLLPGR VEYELSEEGDEPQYLDLPSTATSVNIPDLLPGRK YIVNVYQISEDGEQSLILSTSQTTAPDAPPDPTVDQVDDTSIVVR VEYELSEEGDEPQYLDLPSTATSVNIPDLLPGR VEYELSEEGDEPQYLDLPSTATSVNIPDLLPGRK YIVNVYQISEDGEQSLILSTSQTTAPDAPPDPTVDQVDDTSIVVR	VEYELSEEGDEPQYLDLPSTATSVNIPDLLPGR VEYELSEEGDEPQYLDLPSTATSVNIPDLLPGRK YIVNVYQISEDGEQSLILSTSQTTAPDAPPDPTVDQVDDTSIVVR VEYELSEEGDEPQYLDLPSTATSVNIPDLLPGR YIVNVYQISEDGEQSLILSTSQTTAPDAPPDPTVDQVDDTSIVVR	99	76	77	64	45
FN1	Fibronectin	A0A024R462_HUMAN	50Step_Domain_p1800.0_to_1850.0	1800	1850	50.0 AA STEP	50	152	160	114	95	53	1.36	0.0048	142	74	DTLTSRPAQGVVTTLENVSPPR TETITGFQVDAVPANGQTPIQR VTDATETTITISWR DTLTSRPAQGVVTTLENVSPPR TETITGFQVDAVPANGQTPIQR VTDATETTITISWR DTLTSRPAQGVVTTLENVSPPR TETITGFQVDAVPANGQTPIQR VTDATETTITISWR	DTLTSRPAQGVVTTLENVSPPR TETITGFQVDAVPANGQTPIQR VTDATETTITISWR DTLTSRPAQGVVTTLENVSPPR TETITGFQVDAVPANGQTPIQR VTDATETTITISWR	193	150	159	80	32
FN1	Fibronectin	A0A024R462_HUMAN	50Step_Domain_p1150.0_to_1200.0	1150	1200	50.0 AA STEP	50	137	142	90	38	97	1.1	0.048	123	68	EVTSDSGSIVVSGLTPGVEYVYTIQVLR STTPDITGYR VVTPLSPPTNLHLEANPDTGVLTVSWER EVTSDSGSIVVSGLTPGVEYVYTIQVLR EVTSDSGSIVVSGLTPGVEYVYTIQVLRDGQER STTPDITGYR VVTPLSPPTNLHLEANPDTGVLTVSWER EVTSDSGSIVVSGLTPGVEYVYTIQVLR STTPDITGYR VVTPLSPPTNLHLEANPDTGVLTVSWER	DGQERDAPIVNK EVTSDSGSIVVSGLTPGVEYVYTIQVLR STTPDITGYR VVTPLSPPTNLHLEANPDTGVLTVSWER DGQERDAPIVNK STTPDITGYR VVTPLSPPTNLHLEANPDTGVLTVSWER	174	133	125	32	59
FN1	Fibronectin	A0A024R462_HUMAN	50Step_Domain_p1400.0_to_1450.0	1400	1450	50.0 AA STEP	50	40	29	57	47	64	-0.28	1	42	56	EESPLLIGQQSTVSDVPR NSITLTNLTPGTEYVVSIVALNGR EESPLLIGQQSTVSDVPR EESPLLIGQQSTVSDVPRDLEVVAATPTSLLISWDAPAVTVR NSITLTNLTPGTEYVVSIVALNGR EESPLLIGQQSTVSDVPR NSITLTNLTPGTEYVVSIVALNGR	EESPLLIGQQSTVSDVPR NSITLTNLTPGTEYVVSIVALNGR EESPLLIGQQSTVSDVPR NSITLTNLTPGTEYVVSIVALNGR	51	27	79	40	39
FN1	Fibronectin	A0A024R462_HUMAN	50Step_Domain_p1350.0_to_1400.0	1350	1400	50.0 AA STEP	50	67	75	1	108	0	-0.12	1	48	54	TGLDSPTGIDFSDITANSFTVHWIAPR NEEDVAELSISPSDNAVVLTNLLPGTEYVVSVSSVYEQHESTPLR TGLDSPTGIDFSDITANSFTVHWIAPR TGLDSPTGIDFSDITANSFTVHWIAPR	TGLDSPTGIDFSDITANSFTVHWIAPR	85	70	2	91	0
FN1	Fibronectin	A0A024R462_HUMAN	50Step_Domain_p2250.0_to_2300.0	2250	2300	50.0 AA STEP	50	44	1	40	44	58	-0.46	1	28	51	QGENGQMMSCTCLGNGK TYHVGEQWQK TYHVGEQWQK QGENGQMMSCTCLGNGK TYHVGEQWQK	QGENGQMMSCTCLGNGK TYHVGEQWQK QGENGQMMSCTCLGNGK TYHVGEQWQK	56	1	56	37	35
FN1	Fibronectin	A0A024R462_HUMAN	50Step_Domain_p2100.0_to_2150.0	2100	2150	50.0 AA STEP	50	39	61	45	36	61	0	1	48	48	GATYNIIVEALK GATYNIIVEALKDQQR VPGTSTSATLTGLTR GATYNIIVEALK GATYNIIVEALKDQQR VPGTSTSATLTGLTR GATYNIIVEALK GATYNIIVEALKDQQR VPGTSTSATLTGLTR	GATYNIIVEALK GATYNIIVEALKDQQR VPGTSTSATLTGLTR GATYNIIVEALK GATYNIIVEALKDQQR VPGTSTSATLTGLTR	49	57	63	30	37
FN1	Fibronectin	A0A024R462_HUMAN	50Step_Domain_p650.0_to_700.0	650	700	50.0 AA STEP	50	49	41	60	23	61	0.16	1	50	42	EATIPGHLNSYTIK GLKPGVVYEGQLISIQQYGHQEVTR EATIPGHLNSYTIK GLKPGVVYEGQLISIQQYGHQEVTR EATIPGHLNSYTIK GLKPGVVYEGQLISIQQYGHQEVTR	EATIPGHLNSYTIK EATIPGHLNSYTIK GLKPGVVYEGQLISIQQYGHQEVTR	62	38	83	19	37
FN1	Fibronectin	A0A024R462_HUMAN	50Step_Domain_p1050.0_to_1100.0	1050	1100	50.0 AA STEP	50	101	80	53	47	36	0.72	1	78	42	ATGVFTTLQPGSSIPPYNTEVTETTIVITWTPAPR NLQPASEYTVSLVAIK ATGVFTTLQPGSSIPPYNTEVTETTIVITWTPAPR NLQPASEYTVSLVAIK QYNVGPSVSKYPLR YPLRNLQPASEYTVSLVAIK ATGVFTTLQPGSSIPPYNTEVTETTIVITWTPAPR NLQPASEYTVSLVAIK NLQPASEYTVSLVAIKGNQESPK QYNVGPSVSKYPLR	ATGVFTTLQPGSSIPPYNTEVTETTIVITWTPAPR NLQPASEYTVSLVAIK ATGVFTTLQPGSSIPPYNTEVTETTIVITWTPAPR NLQPASEYTVSLVAIK	128	75	74	40	22
FN1	Fibronectin	A0A024R462_HUMAN	50Step_Domain_p800.0_to_850.0	800	850	50.0 AA STEP	50	38	35	19	38	41	-0.18	1	31	40	WSRPQAPITGYR YIVNVYQISEDGEQSLILSTSQTTAPDAPPDPTVDQVDDTSIVVR WSRPQAPITGYR YIVNVYQISEDGEQSLILSTSQTTAPDAPPDPTVDQVDDTSIVVR WSRPQAPITGYR YIVNVYQISEDGEQSLILSTSQTTAPDAPPDPTVDQVDDTSIVVR	WSRPQAPITGYR YIVNVYQISEDGEQSLILSTSQTTAPDAPPDPTVDQVDDTSIVVR WSRPQAPITGYR YIVNVYQISEDGEQSLILSTSQTTAPDAPPDPTVDQVDDTSIVVR	48	33	26	32	25
FN1	Fibronectin	A0A024R462_HUMAN	50Step_Domain_p1300.0_to_1350.0	1300	1350	50.0 AA STEP	50	22	46	27	27	45	-0.08	1	32	36	VTWAPPPSIDLTNFLVR NEEDVAELSISPSDNAVVLTNLLPGTEYVVSVSSVYEQHESTPLR VTWAPPPSIDLTNFLVR VTWAPPPSIDLTNFLVR	VTWAPPPSIDLTNFLVR VTWAPPPSIDLTNFLVR	28	43	37	23	27
FN1	Fibronectin	A0A024R462_HUMAN	50Step_Domain_p50.0_to_100.0	50	100	50.0 AA STEP	50	20	6	29	36	25	-0.24	1	18	30	HYQINQQWER TYLGNALVCTCYGGSR HYQINQQWER GFNCESKPEAEETCFDK HYQINQQWER	HYQINQQWER HYQINQQWER	26	6	41	30	15
FN1	Fibronectin	A0A024R462_HUMAN	50Step_Domain_p2200.0_to_2250.0	2200	2250	50.0 AA STEP	50	37	0	29	34	26	-0.16	1	22	30	QGENGQMMSCTCLGNGK QGENGQMMSCTCLGNGK	QGENGQMMSCTCLGNGK QGENGQMMSCTCLGNGK	47	0	40	29	16
FN1	Fibronectin	A0A024R462_HUMAN	50Step_Domain_p1100.0_to_1150.0	1100	1150	50.0 AA STEP	50	89	106	52	38	18	1.08	0.0624	82	28	ATGVFTTLQPGSSIPPYNTEVTETTIVITWTPAPR EVTSDSGSIVVSGLTPGVEYVYTIQVLR LGVRPSQGGEAPR ATGVFTTLQPGSSIPPYNTEVTETTIVITWTPAPR EVTSDSGSIVVSGLTPGVEYVYTIQVLR EVTSDSGSIVVSGLTPGVEYVYTIQVLRDGQER LGVRPSQGGEAPR ATGVFTTLQPGSSIPPYNTEVTETTIVITWTPAPR EVTSDSGSIVVSGLTPGVEYVYTIQVLR LGVRPSQGGEAPR	ATGVFTTLQPGSSIPPYNTEVTETTIVITWTPAPR EVTSDSGSIVVSGLTPGVEYVYTIQVLR LGVRPSQGGEAPR ATGVFTTLQPGSSIPPYNTEVTETTIVITWTPAPR LGVRPSQGGEAPR	113	99	73	32	11
FN1	Fibronectin	A0A024R462_HUMAN	50Step_Domain_p2300.0_to_2350.0	2300	2350	50.0 AA STEP	50	15	11	22	28	25	-0.2	1	16	26	RPGGEPSPEGTTGQSYNQYSQR TNTNVNCPIECFMPLDVQADR TNTNVNCPIECFMPLDVQADREDSRE RPGGEPSPEGTTGQSYNQYSQR RPGGEPSPEGTTGQSYNQYSQR TNTNVNCPIECFMPLDVQADR TNTNVNCPIECFMPLDVQADREDSRE	RPGGEPSPEGTTGQSYNQYSQR TNTNVNCPIECFMPLDVQADR TNTNVNCPIECFMPLDVQADREDSRE RPGGEPSPEGTTGQSYNQYSQR TNTNVNCPIECFMPLDVQADR	19	10	31	24	15
FN1	Fibronectin	A0A024R462_HUMAN	50Step_Domain_p1200.0_to_1250.0	1200	1250	50.0 AA STEP	50	24	14	21	14	21	0.04	1	20	18	STTPDITGYR STTPDITGYR STTPDITGYR	STTPDITGYR STTPDITGYR	30	13	29	12	13
FN1	Fibronectin	A0A024R462_HUMAN	50Step_Domain_p350.0_to_400.0	350	400	50.0 AA STEP	50	18	19	32	20	13	0.14	1	23	16	QDGHLWCSTTSNYEQDQK TFYSCTTEGR YSFCTDHTVLVQTR QDGHLWCSTTSNYEQDQK YSFCTDHTVLVQTR QDGHLWCSTTSNYEQDQK TFYSCTTEGR YSFCTDHTVLVQTR	QDGHLWCSTTSNYEQDQK QDGHLWCSTTSNYEQDQK	23	18	44	17	8
FN1	Fibronectin	A0A024R462_HUMAN	50Step_Domain_p100.0_to_150.0	100	150	50.0 AA STEP	50	2	4	0	6	18	-0.2	1	2	12	VGDTYERPK VGDTYERPK	VGDTYERPK VGDTYERPK	2	4	0	5	11
FN1	Fibronectin	A0A024R462_HUMAN	50Step_Domain_p1000.0_to_1050.0	1000	1050	50.0 AA STEP	50	17	3	14	13	10	-0.02	1	11	12	LDAPTNLQFVNETDSTVLVR QYNVGPSVSK QYNVGPSVSK QYNVGPSVSKYPLR LDAPTNLQFVNETDSTVLVR QYNVGPSVSK QYNVGPSVSKYPLR	LDAPTNLQFVNETDSTVLVR QYNVGPSVSK LDAPTNLQFVNETDSTVLVR QYNVGPSVSK	21	3	19	11	6
FN1	Fibronectin	A0A024R462_HUMAN	50Step_Domain_p1700.0_to_1750.0	1700	1750	50.0 AA STEP	50	11	16	9	8	13	0.04	1	12	10	FTQVTPTSLSAQWTPPNVQLTGYR FTQVTPTSLSAQWTPPNVQLTGYR FTQVTPTSLSAQWTPPNVQLTGYR	FTQVTPTSLSAQWTPPNVQLTGYR FTQVTPTSLSAQWTPPNVQLTGYR	14	15	13	7	8
FN1	Fibronectin	A0A024R462_HUMAN	50Step_Domain_p2150.0_to_2200.0	2150	2200	50.0 AA STEP	50	6	12	6	8	12	-0.04	1	8	10	EEVVTVGNSVNEGLNQPTDDSCFDPYTVSHYAVGDEWER VREEVVTVGNSVNEGLNQPTDDSCFDPYTVSHYAVGDEWER EEVVTVGNSVNEGLNQPTDDSCFDPYTVSHYAVGDEWER VREEVVTVGNSVNEGLNQPTDDSCFDPYTVSHYAVGDEWER EEVVTVGNSVNEGLNQPTDDSCFDPYTVSHYAVGDEWER VREEVVTVGNSVNEGLNQPTDDSCFDPYTVSHYAVGDEWER	EEVVTVGNSVNEGLNQPTDDSCFDPYTVSHYAVGDEWER VREEVVTVGNSVNEGLNQPTDDSCFDPYTVSHYAVGDEWER EEVVTVGNSVNEGLNQPTDDSCFDPYTVSHYAVGDEWER	8	11	8	7	7
FN1	Fibronectin	A0A024R462_HUMAN	50Step_Domain_p300.0_to_350.0	300	350	50.0 AA STEP	50	6	2	1	0	15	-0.1	1	3	8	AAVYQPQPHPQPPPYGHCVTDSGVVYSVGMQWLK AAVYQPQPHPQPPPYGHCVTDSGVVYSVGMQWLK AAVYQPQPHPQPPPYGHCVTDSGVVYSVGMQWLK	AAVYQPQPHPQPPPYGHCVTDSGVVYSVGMQWLK	7	2	2	0	9
FN1	Fibronectin	A0A024R462_HUMAN	50Step_Domain_p400.0_to_450.0	400	450	50.0 AA STEP	50	17	12	17	7	3	0.2	1	15	5	WCGTTQNYDADQK YSFCTDHTVLVQTR WCGTTQNYDADQK YSFCTDHTVLVQTR WCGTTQNYDADQK YSFCTDHTVLVQTR	WCGTTQNYDADQK WCGTTQNYDADQK	22	11	24	6	2
FN1	Fibronectin	A0A024R462_HUMAN	50Step_Domain_p450.0_to_500.0	450	500	50.0 AA STEP	50	17	6	13	7	3	0.14	1	12	5	FGFCPMAAHEEICTTNEGVMYR WCGTTQNYDADQK QHDMGHMMR WCGTTQNYDADQK FGFCPMAAHEEICTTNEGVMYR WCGTTQNYDADQK	WCGTTQNYDADQK WCGTTQNYDADQK	21	6	18	6	2
FN1	Fibronectin	A0A024R462_HUMAN	50Step_Domain_p2050.0_to_2100.0	2050	2100	50.0 AA STEP	50	6	2	11	4	3	0.04	1	6	4	TTPPTTATPIR TPFVTHPGYDTGNGIQLPGTSGQQPSVGQQMIFEEHGFR TTPPTTATPIR	TTPPTTATPIR TTPPTTATPIR	8	2	15	3	2
FN1	Fibronectin	A0A024R462_HUMAN	50Step_Domain_p1600.0_to_1650.0	1600	1650	50.0 AA STEP	50	6	6	6	4	0	0.08	1	6	2	GLAFTDVDVDSIK IAWESPQGQVSR GLAFTDVDVDSIK IAWESPQGQVSR GLAFTDVDVDSIK IAWESPQGQVSR	GLAFTDVDVDSIK IAWESPQGQVSR	7	6	8	3	0
FN1	Fibronectin	A0A024R462_HUMAN	50Step_Domain_p2000.0_to_2050.0	2000	2050	50.0 AA STEP	50	6	7	0	0	3	0.04	1	4	2	TDELPQLVTLPHPNLHGPEILDVPSTVQK KTDELPQLVTLPHPNLHGPEILDVPSTVQK TDELPQLVTLPHPNLHGPEILDVPSTVQK TPFVTHPGYDTGNGIQLPGTSGQQPSVGQQMIFEEHGFR	TDELPQLVTLPHPNLHGPEILDVPSTVQK	8	7	0	0	2
FN1	Fibronectin	A0A024R462_HUMAN	50Step_Domain_p1950.0_to_2000.0	1950	2000	50.0 AA STEP	50	6	5	1	0	3	0.04	1	4	2	TDELPQLVTLPHPNLHGPEILDVPSTVQK KTDELPQLVTLPHPNLHGPEILDVPSTVQK TDELPQLVTLPHPNLHGPEILDVPSTVQK NNQKSEPLIGR	TDELPQLVTLPHPNLHGPEILDVPSTVQK	8	5	1	0	2
FN1	Fibronectin	A0A024R462_HUMAN	50Step_Domain_p500.0_to_550.0	500	550	50.0 AA STEP	50	2	1	1	0	2	0	1	1	1	GEWTCIAYSQLR GEWTCIAYSQLR GEWTCIAYSQLR	GEWTCIAYSQLR	2	1	1	0	1
FN1	Fibronectin	A0A024R462_HUMAN	50Step_Domain_p1650.0_to_1700.0	1650	1700	50.0 AA STEP	50	1	1	2	1	0	0.02	1	1	0	IAWESPQGQVSR IAWESPQGQVSR IAWESPQGQVSR	IAWESPQGQVSR	1	1	3	1	0
FRZB	Secreted frizzled-related protein 3	SFRP3_HUMAN	50Step_Domain_p200.0_to_250.0	200	250	50.0 AA STEP	50	2	0	0	3	3	-0.04	0.014	1	3	SSLVNIPR	SSLVNIPR SSLVNIPR	1	0	0	5	5
FRZB	Secreted frizzled-related protein 3	SFRP3_HUMAN	50Step_Domain_p250.0_to_300.0	250	300	50.0 AA STEP	50	2	0	0	2	4	-0.04	0.014	1	3	LLLVEGSIAEK	LLLVEGSIAEK LLLVEGSIAEK	1	0	0	4	7
FRZB	Secreted frizzled-related protein 3	SFRP3_HUMAN	50Step_Domain_p150.0_to_200.0	150	200	50.0 AA STEP	50	2	0	0	2	1	-0.02	1	1	2	NNYNYVIR	NNYNYVIR GVCISPEAIVTADGADFPMDSSNGNCR	1	0	0	3	1
FTH1	Ferritin heavy chain	FRIH_HUMAN	50Step_Domain_p150.0_to_183.0	150	183	50.0 AA STEP	33	7	8	7	8	7	-0.030303	1	7	8	ELGDHVTNLR MGAPESGLAEYLFDK ELGDHVTNLR MGAPESGLAEYLFDK ELGDHVTNLR MGAPESGLAEYLFDK	ELGDHVTNLR MGAPESGLAEYLFDK ELGDHVTNLR MGAPESGLAEYLFDK	5	6	10	4	6
FTH1	Ferritin heavy chain	FRIH_HUMAN	50Step_Domain_p100.0_to_150.0	100	150	50.0 AA STEP	50	5	4	5	6	6	-0.02	0.0112	5	6	ELGDHVTNLR NVNQSLLELHK ELGDHVTNLR NVNQSLLELHK ELGDHVTNLR NVNQSLLELHK	ELGDHVTNLR NVNQSLLELHK ELGDHVTNLR NVNQSLLELHK	4	3	7	3	5
GANAB	Neutral alpha-glucosidase AB	GANAB_HUMAN	50Step_Domain_p100.0_to_150.0	100	150	50.0 AA STEP	50	1	1	1	3	4	-0.06	0	1	4	VPDVLVADPPIAR DENSVELTMAEGPYK DENSVELTMAEGPYK	DENSVELTMAEGPYK FRIDELEPR VPDVLVADPPIAR DENSVELTMAEGPYK VPDVLVADPPIAR	1	1	1	4	2
GANAB	Neutral alpha-glucosidase AB	GANAB_HUMAN	50Step_Domain_p650.0_to_700.0	650	700	50.0 AA STEP	50	2	0	1	1	2	-0.02	1	1	2	NPEPELLVR NPEPELLVR	NPEPELLVR NPEPELLVR	2	0	1	1	1
GANAB	Neutral alpha-glucosidase AB	GANAB_HUMAN	50Step_Domain_p200.0_to_250.0	200	250	50.0 AA STEP	50	1	1	3	1	0	0.04	0.0855	2	0	DEPGAWEETFK DPAEGDGAQPEETPR DEPGAWEETFK DPAEGDGAQPEETPR VSQGSKDPAEGDGAQPEETPR	DEPGAWEETFK	1	1	4	1	0
GANAB	Neutral alpha-glucosidase AB	GANAB_HUMAN	50Step_Domain_p400.0_to_450.0	400	450	50.0 AA STEP	50	0	1	0	1	0	0	1	0	0	YFTWDPSR	YFTWDPSR	0	1	0	1	0
GPX3	Glutathione peroxidase 3	GPX3_HUMAN	50Step_Domain_p100.0_to_150.0	100	150	50.0 AA STEP	50	1	1	2	7	7	-0.12	0	1	7	QEPGENSEILPTLK QEPGENSEILPTLK QEPGENSEILPTLK	QEPGENSEILPTLK QEPGENSEILPTLK	1	1	1	2	2
GPX3	Glutathione peroxidase 3	GPX3_HUMAN	50Step_Domain_p150.0_to_200.0	150	200	50.0 AA STEP	50	8	7	9	4	4	0.08	0	8	4	FLVGPDGIPIMR NSCPPTSELLGTSDR FLVGPDGIPIMR NSCPPTSELLGTSDR FLVGPDGIPIMR NSCPPTSELLGTSDR	FLVGPDGIPIMR FLVGPDGIPIMR	6	12	6	1	1
GSN	Gelsolin	GELS_HUMAN	50Step_Domain_p350.0_to_400.0	350	400	50.0 AA STEP	50	9	14	4	17	13	-0.12	0.5184	9	15	DPDQTDGLGLSYLSSHIANVER NWRDPDQTDGLGLSYLSSHIANVER QTQVSVLPEGGETPLFK DPDQTDGLGLSYLSSHIANVER NWRDPDQTDGLGLSYLSSHIANVER QTQVSVLPEGGETPLFK QTQVSVLPEGGETPLFK	DPDQTDGLGLSYLSSHIANVER QTQVSVLPEGGETPLFK DPDQTDGLGLSYLSSHIANVER QTQVSVLPEGGETPLFK TASDFITK	11	20	3	10	9
GSN	Gelsolin	GELS_HUMAN	50Step_Domain_p600.0_to_650.0	600	650	50.0 AA STEP	50	15	7	12	17	8	-0.02	1	11	12	AQPVQVAEGSEPDGFWEALGGK TGAQELLR TPSAAYLWVGTGASEAEK AQPVQVAEGSEPDGFWEALGGK TPSAAYLWVGTGASEAEK AQPVQVAEGSEPDGFWEALGGK TPSAAYLWVGTGASEAEK	AQPVQVAEGSEPDGFWEALGGK TGAQELLR TPSAAYLWVGTGASEAEK AQPVQVAEGSEPDGFWEALGGK TPSAAYLWVGTGASEAEK	18	10	9	10	6
GSN	Gelsolin	GELS_HUMAN	50Step_Domain_p550.0_to_600.0	550	600	50.0 AA STEP	50	11	4	12	12	13	-0.06	1	9	12	AGALNSNDAFVLK EGGQTAPASTR TPSAAYLWVGTGASEAEK AGALNSNDAFVLK TPSAAYLWVGTGASEAEK AGALNSNDAFVLK TPSAAYLWVGTGASEAEK	AGALNSNDAFVLK TPSAAYLWVGTGASEAEK AGALNSNDAFVLK TPSAAYLWVGTGASEAEK	13	6	9	7	9
GSN	Gelsolin	GELS_HUMAN	50Step_Domain_p150.0_to_200.0	150	200	50.0 AA STEP	50	11	10	18	7	17	0.02	1	13	12	EVQGFESATFLGYFK HVVPNEVVVQR EVQGFESATFLGYFK HVVPNEVVVQR EVQGFESATFLGYFK HVVPNEVVVQR	EVQGFESATFLGYFK HVVPNEVVVQR EVQGFESATFLGYFK HVVPNEVVVQR	13	14	14	4	12
GSN	Gelsolin	GELS_HUMAN	50Step_Domain_p100.0_to_150.0	100	150	50.0 AA STEP	50	8	7	14	5	14	0	1	10	10	EVQGFESATFLGYFK EVQGFESATFLGYFK EVQGFESATFLGYFK	EVQGFESATFLGYFK EVQGFESATFLGYFK	10	10	11	3	10
GSN	Gelsolin	GELS_HUMAN	50Step_Domain_p50.0_to_100.0	50	100	50.0 AA STEP	50	7	7	8	5	4	0.06	1	7	4	AGKEPGLQIWR EPGLQIWR FDLVPVPTNLYGDFFTGDAYVILK EPGLQIWR FDLVPVPTNLYGDFFTGDAYVILK EPGLQIWR	EPGLQIWR EPGLQIWR	8	10	6	3	3
GSN	Gelsolin	GELS_HUMAN	50Step_Domain_p400.0_to_450.0	400	450	50.0 AA STEP	50	6	13	0	3	3	0.06	1	6	3	DPDQTDGLGLSYLSSHIANVER NWRDPDQTDGLGLSYLSSHIANVER VPFDAATLHTSTAMAAQHGMDDDGTGQK DPDQTDGLGLSYLSSHIANVER NWRDPDQTDGLGLSYLSSHIANVER VPFDAATLHTSTAMAAQHGMDDDGTGQK	DPDQTDGLGLSYLSSHIANVER DPDQTDGLGLSYLSSHIANVER	7	18	0	2	2
GSN	Gelsolin	GELS_HUMAN	50Step_Domain_p450.0_to_500.0	450	500	50.0 AA STEP	50	4	4	3	2	0	0.06	1	4	1	VPVDPATYGQFYGGDSYIILYNYR QGQIIYNWQGAQSTQDEVAASAILTAQLDEELGGTPVQSR VPVDPATYGQFYGGDSYIILYNYR VPVDPATYGQFYGGDSYIILYNYR	VPVDPATYGQFYGGDSYIILYNYR	5	5	2	1	0
H2BC11	Histone H2B type 1-J	H2B1J_HUMAN	50Step_Domain_p100.0_to_126.0	100	126	50.0 AA STEP	26	3	3	4	3	4	-0.0384615	1	3	4	LLLPGELAK LLLPGELAK LLLPGELAK	LLLPGELAK LLLPGELAK	1	3	5	5	3
H2BC11	Histone H2B type 1-J	H2B1J_HUMAN	50Step_Domain_p50.0_to_100.0	50	100	50.0 AA STEP	50	6	6	5	4	0	0.08	0.0201	6	2	AMGIMNSFVNDIFER AMGIMNSFVNDIFER AMGIMNSFVNDIFER	AMGIMNSFVNDIFER QVHPDTGISSK	2	7	6	7	0
H2BC17	Histone H2B type 1-O	H2B1O_HUMAN	50Step_Domain_p100.0_to_126.0	100	126	50.0 AA STEP	26	3	3	4	3	4	-0.0384615	1	3	4	LLLPGELAK LLLPGELAK LLLPGELAK	LLLPGELAK LLLPGELAK	1	3	5	5	3
H2BC17	Histone H2B type 1-O	H2B1O_HUMAN	50Step_Domain_p50.0_to_100.0	50	100	50.0 AA STEP	50	6	6	5	4	0	0.08	0.0201	6	2	AMGIMNSFVNDIFER AMGIMNSFVNDIFER AMGIMNSFVNDIFER	AMGIMNSFVNDIFER QVHPDTGISSK	2	7	6	7	0
H2BC21	Histone H2B type 2-E	H2B2E_HUMAN	50Step_Domain_p100.0_to_126.0	100	126	50.0 AA STEP	26	3	3	4	3	4	-0.0384615	1	3	4	LLLPGELAK LLLPGELAK LLLPGELAK	LLLPGELAK LLLPGELAK	1	3	5	5	3
H2BC21	Histone H2B type 2-E	H2B2E_HUMAN	50Step_Domain_p50.0_to_100.0	50	100	50.0 AA STEP	50	6	6	5	4	0	0.08	0.0201	6	2	AMGIMNSFVNDIFER AMGIMNSFVNDIFER AMGIMNSFVNDIFER	AMGIMNSFVNDIFER QVHPDTGISSK	2	7	6	7	0
H2BC3	Histone H2B type 1-B	H2B1B_HUMAN	50Step_Domain_p100.0_to_126.0	100	126	50.0 AA STEP	26	3	3	4	3	4	-0.0384615	1	3	4	LLLPGELAK LLLPGELAK LLLPGELAK	LLLPGELAK LLLPGELAK	1	3	5	5	3
H2BC3	Histone H2B type 1-B	H2B1B_HUMAN	50Step_Domain_p50.0_to_100.0	50	100	50.0 AA STEP	50	6	6	5	4	0	0.08	0.0201	6	2	AMGIMNSFVNDIFER AMGIMNSFVNDIFER AMGIMNSFVNDIFER	AMGIMNSFVNDIFER QVHPDTGISSK	2	7	6	7	0
H4C1	Histone H4	H4_HUMAN	50Step_Domain_p50.0_to_100.0	50	100	50.0 AA STEP	50	8	10	11	11	16	-0.08	0.0492	10	14	ISGLIYEETR TVTAMDVVYALK VFLENVIR ISGLIYEETR TVTAMDVVYALK VFLENVIR ISGLIYEETR TVTAMDVVYALK VFLENVIR	DAVTYTEHAK ISGLIYEETR TVTAMDVVYALK VFLENVIR DAVTYTEHAK ISGLIYEETR TVTAMDVVYALK VFLENVIR	5	12	12	15	17
H4C1	Histone H4	H4_HUMAN	50Step_Domain_p0_to_50	0	50	50.0 AA STEP	50	5	4	5	4	5	0.02	1	5	4	DNIQGITKPAIR ISGLIYEETR DNIQGITKPAIR ISGLIYEETR DNIQGITKPAIR ISGLIYEETR	DNIQGITKPAIR ISGLIYEETR ISGLIYEETR	3	5	6	6	6
HEL107	Epididymis luminal protein 107	V9HWD9_HUMAN	50Step_Domain_p250.0_to_300.0	250	300	50.0 AA STEP	50	0	2	0	2	2	-0.02	0.0832	1	2	ILATPPQEDAPSVDIANIR	ILATPPQEDAPSVDIANIR ILATPPQEDAPSVDIANIR	0	2	0	2	3
HEL107	Epididymis luminal protein 107	V9HWD9_HUMAN	50Step_Domain_p300.0_to_350.0	300	350	50.0 AA STEP	50	0	2	0	2	2	-0.02	0.0832	1	2	ILATPPQEDAPSVDIANIR	ILATPPQEDAPSVDIANIR IIALDGDTK ILATPPQEDAPSVDIANIR	0	2	0	2	4
HEL107	Epididymis luminal protein 107	V9HWD9_HUMAN	50Step_Domain_p150.0_to_200.0	150	200	50.0 AA STEP	50	0	1	0	1	0	0	1	0	0	LDNLVAILDINR	LGQSDPAPLQHQMDIYQK	0	1	0	1	0
HEL107	Epididymis luminal protein 107	V9HWD9_HUMAN	50Step_Domain_p400.0_to_450.0	400	450	50.0 AA STEP	50	1	0	0	0	1	0	1	0	0	SVPTSTVFYPSDGVATEK	SVPTSTVFYPSDGVATEK	1	0	0	0	1
HEL107	Epididymis luminal protein 107	V9HWD9_HUMAN	50Step_Domain_p450.0_to_500.0	450	500	50.0 AA STEP	50	1	0	0	0	1	0	1	0	0	SVPTSTVFYPSDGVATEK	SVPTSTVFYPSDGVATEK	1	0	0	0	1
HEL2	Epididymis luminal protein 2	V9HW98_HUMAN	50Step_Domain_p200.0_to_250.0	200	250	50.0 AA STEP	50	3	4	2	4	6	-0.04	0.1644	3	5	AAFDDAIAELDTLSEESYK DSTLIMQLLR DSTLIMQLLR DSTLIMQLLR	AAFDDAIAELDTLSEESYK DSTLIMQLLR EALQDVEDENQ AAFDDAIAELDTLSEESYK DSTLIMQLLR	2	5	1	6	4
HEL2	Epididymis luminal protein 2	V9HW98_HUMAN	50Step_Domain_p150.0_to_200.0	150	200	50.0 AA STEP	50	3	0	0	3	4	-0.06	0.0462	1	4	AAFDDAIAELDTLSEESYK EAAENSLVAYK	AAFDDAIAELDTLSEESYK AASDIAMTELPPTHPIR EAAENSLVAYK AAFDDAIAELDTLSEESYK EAAENSLVAYK	2	0	0	4	3
HEL2	Epididymis luminal protein 2	V9HW98_HUMAN	50Step_Domain_p0_to_50	0	50	50.0 AA STEP	50	4	4	5	2	1	0.04	0.0192	4	2	NLLSVAYK VAGMDVELTVEER NLLSVAYK VAGMDVELTVEER YDEMVESMK NLLSVAYK VAGMDVELTVEER	NLLSVAYK VAGMDVELTVEER NLLSVAYK	3	5	3	3	1
HEL2	Epididymis luminal protein 2	V9HW98_HUMAN	50Step_Domain_p100.0_to_150.0	100	150	50.0 AA STEP	50	1	0	0	1	1	-0.02	1	0	1	EAAENSLVAYK	EAAENSLVAYK HLIPAANTGESK EAAENSLVAYK	1	0	0	2	1
HEL70	Epididymis luminal protein 70	V9HWC0_HUMAN	50Step_Domain_p50.0_to_100.0	50	100	50.0 AA STEP	50	2	5	3	2	4	0	1	3	3	FYPEDVSEELIQDITQR EVWFFGLQYQDTK FYPEDVSEELIQDITQR EVWFFGLQYQDTK	FYPEDVSEELIQDITQR FYPEDVSEELIQDITQR	2	5	2	2	6
HEL70	Epididymis luminal protein 70	V9HWC0_HUMAN	50Step_Domain_p400.0_to_450.0	400	450	50.0 AA STEP	50	4	2	2	3	1	0.02	1	3	2	AQMVQEDLEK ESEAVEWQQK ISQLEMAR AQMVQEDLEK TQEQLALEMAELTAR AQMVQEDLEK	ISQLEMAR TQEQLALEMAELTAR TQEQLALEMAELTAR	4	2	1	3	2
HEL70	Epididymis luminal protein 70	V9HWC0_HUMAN	50Step_Domain_p350.0_to_400.0	350	400	50.0 AA STEP	50	1	0	2	3	1	-0.02	1	1	2	ALELEQER ALELEQER	ALELEQER AQQELEEQTR ALELEQER AQQELEEQTR	1	0	1	3	2
HEL70	Epididymis luminal protein 70	V9HWC0_HUMAN	50Step_Domain_p150.0_to_200.0	150	200	50.0 AA STEP	50	2	2	2	2	1	0	1	2	2	EDAVLEYLK EDAVLEYLK EDAVLEYLK	EDAVLEYLK EDAVLEYLK	2	2	1	2	2
HEL70	Epididymis luminal protein 70	V9HWC0_HUMAN	50Step_Domain_p200.0_to_250.0	200	250	50.0 AA STEP	50	2	2	0	1	2	-0.02	1	1	2	IGFPWSEIR IGFPWSEIR	IGFPWSEIR IGFPWSEIR	2	2	0	1	3
HEL70	Epididymis luminal protein 70	V9HWC0_HUMAN	50Step_Domain_p250.0_to_300.0	250	300	50.0 AA STEP	50	1	0	2	1	1	0	1	1	1	APDFVFYAPR APDFVFYAPR	APDFVFYAPR APDFVFYAPR	1	0	1	1	1
HEL70	Epididymis luminal protein 70	V9HWC0_HUMAN	50Step_Domain_p0_to_50	0	50	50.0 AA STEP	50	1	4	5	0	1	0.06	0.0228	3	0	QLFDQVVK EVWFFGLQYQDTK QLFDQVVK EVWFFGLQYQDTK QLFDQVVK	QLFDQVVK	1	4	3	0	1
HEL-S-15	Cofilin; non-muscle isoform	V9HWI5_HUMAN	50Step_Domain_p50.0_to_100.0	50	100	50.0 AA STEP	50	5	5	5	5	0	0.06	0.1256	5	2	EILVGDVGQTVDDPYATFVK YALYDATYETK EDLVFIFWAPESAPLK EILVGDVGQTVDDPYATFVK KEDLVFIFWAPESAPLK YALYDATYETK EILVGDVGQTVDDPYATFVK YALYDATYETK	EILVGDVGQTVDDPYATFVK YALYDATYETK	3	9	3	2	0
HEL-S-153w	Alpha-1-acid glycoprotein	V9HWF6_HUMAN	50Step_Domain_p100.0_to_150.0	100	150	50.0 AA STEP	50	24	28	13	12	0	0.32	0.0225	22	6	NWGLSVYADKPETTK TYMLAFDVNDEK YVGGQEHFAHLLILR NWGLSVYADKPETTK TYMLAFDVNDEK YVGGQEHFAHLLILR NWGLSVYADKPETTK TYMLAFDVNDEK YVGGQEHFAHLLILR	TYMLAFDVNDEK	48	32	4	1	0
HEL-S-153w	Alpha-1-acid glycoprotein	V9HWF6_HUMAN	50Step_Domain_p150.0_to_200.0	150	200	50.0 AA STEP	50	11	11	16	12	0	0.14	0.8785	13	6	NWGLSVYADKPETTK SDVVYTDWK EQLGEFYEALDCLR NWGLSVYADKPETTK SDVVYTDWK NWGLSVYADKPETTK SDVVYTDWK	SDVVYTDWK	21	13	5	1	0
HEL-S-153w	Alpha-1-acid glycoprotein	V9HWF6_HUMAN	50Step_Domain_p50.0_to_100.0	50	100	50.0 AA STEP	50	7	4	13	12	0	0.04	1	8	6	TEDTIFLR WFYIASAFR TEDTIFLR WFYIASAFR TEDTIFLR	TEDTIFLR	14	5	4	1	0
HEL-S-164nA	Epididymis secretory sperm binding protein Li 164nA	V9HWJ0_HUMAN	50Step_Domain_p100.0_to_150.0	100	150	50.0 AA STEP	50	1	1	1	3	4	-0.06	0	1	4	VPDVLVADPPIAR DENSVELTMAEGPYK DENSVELTMAEGPYK	DENSVELTMAEGPYK FRIDELEPR VPDVLVADPPIAR DENSVELTMAEGPYK VPDVLVADPPIAR	1	1	1	4	2
HEL-S-164nA	Epididymis secretory sperm binding protein Li 164nA	V9HWJ0_HUMAN	50Step_Domain_p650.0_to_700.0	650	700	50.0 AA STEP	50	2	0	1	1	2	-0.02	1	1	2	NPEPELLVR NPEPELLVR	NPEPELLVR NPEPELLVR	2	0	1	1	1
HEL-S-164nA	Epididymis secretory sperm binding protein Li 164nA	V9HWJ0_HUMAN	50Step_Domain_p200.0_to_250.0	200	250	50.0 AA STEP	50	1	1	3	1	0	0.04	0.0855	2	0	DEPGAWEETFK DPAEGDGAQPEETPR DEPGAWEETFK DPAEGDGAQPEETPR VSQGSKDPAEGDGAQPEETPR	DEPGAWEETFK	1	1	4	1	0
HEL-S-164nA	Epididymis secretory sperm binding protein Li 164nA	V9HWJ0_HUMAN	50Step_Domain_p400.0_to_450.0	400	450	50.0 AA STEP	50	0	1	0	1	0	0	1	0	0	YFTWDPSR	YFTWDPSR	0	1	0	1	0
HEL-S-17	2-phospho-D-glycerate hydro-lyase	A0A024R4F1_HUMAN	50Step_Domain_p0_to_50	0	50	50.0 AA STEP	50	15	9	8	8	10	0.04	1	11	9	AAVPSGASTGIYEALELR GNPTVEVDLFTSK AAVPSGASTGIYEALELR GNPTVEVDLFTSK AAVPSGASTGIYEALELR GNPTVEVDLFTSK	AAVPSGASTGIYEALELR GNPTVEVDLFTSK AAVPSGASTGIYEALELR GNPTVEVDLFTSK	10	7	8	10	11
HEL-S-17	2-phospho-D-glycerate hydro-lyase	A0A024R4F1_HUMAN	50Step_Domain_p250.0_to_300.0	250	300	50.0 AA STEP	50	15	21	14	12	5	0.18	0.0036	17	8	DYPVVSIEDPFDQDDWGAWQK VVIGMDVAASEFFR YISPDQLADLYK DYPVVSIEDPFDQDDWGAWQK VVIGMDVAASEFFR YISPDQLADLYK DYPVVSIEDPFDQDDWGAWQK VVIGMDVAASEFFR YISPDQLADLYK	DYPVVSIEDPFDQDDWGAWQK VVIGMDVAASEFFR YISPDQLADLYK DYPVVSIEDPFDQDDWGAWQK YISPDQLADLYK	10	16	14	16	6
HEL-S-17	2-phospho-D-glycerate hydro-lyase	A0A024R4F1_HUMAN	50Step_Domain_p50.0_to_100.0	50	100	50.0 AA STEP	50	3	3	5	6	9	-0.08	0.6444	4	8	TIAPALVSK LMIEMDGTENK TIAPALVSK LMIEMDGTENK TIAPALVSK	LMIEMDGTENK LNVTEQEK TIAPALVSK LMIEMDGTENK LNVTEQEK TIAPALVSK	2	2	5	8	10
HEL-S-17	2-phospho-D-glycerate hydro-lyase	A0A024R4F1_HUMAN	50Step_Domain_p300.0_to_350.0	300	350	50.0 AA STEP	50	3	8	8	8	5	0	1	6	6	DYPVVSIEDPFDQDDWGAWQK DYPVVSIEDPFDQDDWGAWQK FTASAGIQVVGDDLTVTNPK DYPVVSIEDPFDQDDWGAWQK FTASAGIQVVGDDLTVTNPK	DYPVVSIEDPFDQDDWGAWQK FTASAGIQVVGDDLTVTNPK DYPVVSIEDPFDQDDWGAWQK FTASAGIQVVGDDLTVTNPK	2	6	8	10	6
HEL-S-17	2-phospho-D-glycerate hydro-lyase	A0A024R4F1_HUMAN	50Step_Domain_p200.0_to_250.0	200	250	50.0 AA STEP	50	6	10	8	8	4	0.04	1	8	6	DATNVGDEGGFAPNILENK VVIGMDVAASEFFR DATNVGDEGGFAPNILENK VVIGMDVAASEFFR DATNVGDEGGFAPNILENK VVIGMDVAASEFFR	DATNVGDEGGFAPNILENK VVIGMDVAASEFFR DATNVGDEGGFAPNILENK	4	8	8	10	5
HEL-S-17	2-phospho-D-glycerate hydro-lyase	A0A024R4F1_HUMAN	50Step_Domain_p150.0_to_200.0	150	200	50.0 AA STEP	50	4	4	4	5	4	0	1	4	4	IGAEVYHNLK LAMQEFMILPVGAANFR IGAEVYHNLK LAMQEFMILPVGAANFR IGAEVYHNLK LAMQEFMILPVGAANFR	IGAEVYHNLK LAMQEFMILPVGAANFR LAMQEFMILPVGAANFR	3	3	4	7	5
HEL-S-17	2-phospho-D-glycerate hydro-lyase	A0A024R4F1_HUMAN	50Step_Domain_p100.0_to_150.0	100	150	50.0 AA STEP	50	0	1	3	4	4	-0.06	1	1	4	LMIEMDGTENK LMIEMDGTENK	LMIEMDGTENK LMIEMDGTENK	0	1	3	5	4
HEL-S-30	Pyruvate kinase	V9HWB8_HUMAN	50Step_Domain_p100.0_to_150.0	100	150	50.0 AA STEP	50	3	4	3	7	5	-0.06	0.4664	3	6	ITLDNAYMEK ITLDNAYMEK TATESFASDPILYRPVAVALDTK ITLDNAYMEK	GSGTAEVELK ITLDNAYMEK GSGTAEVELK ITLDNAYMEK	1	5	2	11	6
HEL-S-30	Pyruvate kinase	V9HWB8_HUMAN	50Step_Domain_p250.0_to_300.0	250	300	50.0 AA STEP	50	6	3	6	5	5	0	1	5	5	GDLGIEIPAEK RFDEILEASDGIMVAR GDLGIEIPAEK RFDEILEASDGIMVAR FDEILEASDGIMVAR GDLGIEIPAEK	FDEILEASDGIMVAR GDLGIEIPAEK RFDEILEASDGIMVAR FDEILEASDGIMVAR GDLGIEIPAEK	2	4	4	9	6
HEL-S-30	Pyruvate kinase	V9HWB8_HUMAN	50Step_Domain_p150.0_to_200.0	150	200	50.0 AA STEP	50	6	4	3	5	5	-0.02	1	4	5	ITLDNAYMEK IYVDDGLISLQVK GADFLVTEVENGGSLGSK ITLDNAYMEK IYVDDGLISLQVK ITLDNAYMEK	GADFLVTEVENGGSLGSK ITLDNAYMEK IYVDDGLISLQVK GADFLVTEVENGGSLGSK ITLDNAYMEK IYVDDGLISLQVK	2	6	2	8	6
HEL-S-30	Pyruvate kinase	V9HWB8_HUMAN	50Step_Domain_p400.0_to_450.0	400	450	50.0 AA STEP	50	3	4	6	4	5	0	1	4	4	APIIAVTR LAPITSDPTEATAVGAVEASFK APIIAVTR LAPITSDPTEATAVGAVEASFK	APIIAVTR LAPITSDPTEATAVGAVEASFK APIIAVTR LAPITSDPTEATAVGAVEASFK	1	5	4	7	6
HEL-S-30	Pyruvate kinase	V9HWB8_HUMAN	50Step_Domain_p200.0_to_250.0	200	250	50.0 AA STEP	50	3	5	3	3	3	0.02	1	4	3	GVNLPGAAVDLPAVSEK FGVEQDVDMVFASFIR GADFLVTEVENGGSLGSK GVNLPGAAVDLPAVSEK GVNLPGAAVDLPAVSEK	GADFLVTEVENGGSLGSK GVNLPGAAVDLPAVSEK GADFLVTEVENGGSLGSK GVNLPGAAVDLPAVSEK	1	7	2	5	3
HEL-S-30	Pyruvate kinase	V9HWB8_HUMAN	50Step_Domain_p300.0_to_350.0	300	350	50.0 AA STEP	50	3	1	4	2	4	0	1	3	3	GDLGIEIPAEK GDLGIEIPAEK GDLGIEIPAEK	GDLGIEIPAEK GDLGIEIPAEK	1	2	3	4	5
HEL-S-30	Pyruvate kinase	V9HWB8_HUMAN	50Step_Domain_p0_to_50	0	50	50.0 AA STEP	50	3	1	1	3	3	-0.02	1	2	3	LDIDSPPITAR LDIDSPPITAR LDIDSPPITAR	LDIDSPPITAR LDIDSPPITAR	1	1	1	5	4
HEL-S-30	Pyruvate kinase	V9HWB8_HUMAN	50Step_Domain_p450.0_to_500.0	450	500	50.0 AA STEP	50	8	3	7	2	2	0.08	0.0363	6	2	APIIAVTR DPVQEAWAEDVDLR DPVQEAWAEDVDLR VNFAMNVGK APIIAVTR DPVQEAWAEDVDLR VNFAMNVGK	APIIAVTR DPVQEAWAEDVDLR APIIAVTR DPVQEAWAEDVDLR	3	4	5	4	2
HEL-S-30	Pyruvate kinase	V9HWB8_HUMAN	50Step_Domain_p350.0_to_400.0	350	400	50.0 AA STEP	50	0	4	0	0	2	0	1	1	1	EAEAAIYHLQLFEELR GDYPLEAVR	GDYPLEAVR	0	6	0	0	2
HEL-S-62p	C3-beta-c	V9HWA9_HUMAN	50Step_Domain_p250.0_to_300.0	250	300	50.0 AA STEP	50	24	35	41	113	105	-1.52	0	33	109	GLEVTITAR IPIEDGSGEVVLSR ISLPESLK RIPIEDGSGEVVLSR VEGTAFVIFGIQDGEQR GLEVTITAR IPIEDGSGEVVLSR ISLPESLK RIPIEDGSGEVVLSR VEGTAFVIFGIQDGEQR GLEVTITAR IPIEDGSGEVVLSR ISLPESLK RIPIEDGSGEVVLSR VEGTAFVIFGIQDGEQR	IPIEDGSGEVVLSR ISLPESLK IPIEDGSGEVVLSR ISLPESLK	47	65	26	3	2
HEL-S-62p	C3-beta-c	V9HWA9_HUMAN	50Step_Domain_p300.0_to_350.0	300	350	50.0 AA STEP	50	20	22	19	75	53	-0.88	0	20	64	IPIEDGSGEVVLSR RIPIEDGSGEVVLSR SGIPIVTSPYQIHFTK VLLDGVQNPR IPIEDGSGEVVLSR RIPIEDGSGEVVLSR SGIPIVTSPYQIHFTK SLYVSATVILHSGSDMVQAER VLLDGVQNPR IPIEDGSGEVVLSR RIPIEDGSGEVVLSR VLLDGVQNPR	IPIEDGSGEVVLSR IPIEDGSGEVVLSR	39	41	12	2	1
HEL-S-62p	C3-beta-c	V9HWA9_HUMAN	50Step_Domain_p200.0_to_250.0	200	250	50.0 AA STEP	50	15	18	30	38	53	-0.5	0.051	21	46	AYYENSPQQVFSTEFEVK EYVLPSFEVIVEPTEK FYYIYNEK GLEVTITAR QDSLSSQNQLGVLPLSWDIPELVNMGQWK AYYENSPQQVFSTEFEVK EYVLPSFEVIVEPTEK GLEVTITAR QDSLSSQNQLGVLPLSWDIPELVNMGQWK AYYENSPQQVFSTEFEVK EYVLPSFEVIVEPTEK FYYIYNEK GLEVTITAR	EYVLPSFEVIVEPTEK EYVLPSFEVIVEPTEK	29	34	19	1	1
HEL-S-62p	C3-beta-c	V9HWA9_HUMAN	50Step_Domain_p150.0_to_200.0	150	200	50.0 AA STEP	50	9	7	11	38	53	-0.74	0	9	46	QDSLSSQNQLGVLPLSWDIPELVNMGQWK TVMVNIENPEGIPVK QDSLSSQNQLGVLPLSWDIPELVNMGQWK TVMVNIENPEGIPVK TVMVNIENPEGIPVK	TVMVNIENPEGIPVK TVMVNIENPEGIPVK	17	13	7	1	1
HEL-S-62p	C3-beta-c	V9HWA9_HUMAN	50Step_Domain_p400.0_to_450.0	400	450	50.0 AA STEP	50	23	12	32	75	0	-0.32	1	22	38	KQELSEAEQATR QELSEAEQATR TMQALPYSTVGNSNNYLHLSVLR VPVAVQGEDTVQSLTQGDGVAK TMQALPYSTVGNSNNYLHLSVLR VPVAVQGEDTVQSLTQGDGVAK KQELSEAEQATR QELSEAEQATR VPVAVQGEDTVQSLTQGDGVAK	QELSEAEQATR VPVAVQGEDTVQSLTQGDGVAK	46	22	20	2	0
HEL-S-62p	C3-beta-c	V9HWA9_HUMAN	50Step_Domain_p950.0_to_1000.0	950	1000	50.0 AA STEP	50	47	40	66	0	53	0.5	0.051	51	26	EDIPPADLSDQVPDTESETR ILLQGTPVAQMTEDAVDAER EDIPPADLSDQVPDTESETR ILLQGTPVAQMTEDAVDAER EDIPPADLSDQVPDTESETR ILLQGTPVAQMTEDAVDAER	EDIPPADLSDQVPDTESETR	93	74	42	0	1
HEL-S-62p	C3-beta-c	V9HWA9_HUMAN	50Step_Domain_p350.0_to_400.0	350	400	50.0 AA STEP	50	20	14	19	38	0	-0.02	1	18	19	SGIPIVTSPYQIHFTK VPVAVQGEDTVQSLTQGDGVAK SGIPIVTSPYQIHFTK VPVAVQGEDTVQSLTQGDGVAK YFKPGMPFDLMVFVTNPDGSPAYR VPVAVQGEDTVQSLTQGDGVAK	VPVAVQGEDTVQSLTQGDGVAK	40	25	12	1	0
HEL-S-66	Macrophage-capping protein	V9HW69_HUMAN	50Step_Domain_p200.0_to_250.0	200	250	50.0 AA STEP	50	1	1	0	2	1	-0.02	0.3122	1	2	EGNPEEDLTADK EGNPEEDLTADK	EGNPEEDLTADK EGNPEEDLTADK	1	2	0	3	1
HEL-S-66	Macrophage-capping protein	V9HW69_HUMAN	50Step_Domain_p250.0_to_300.0	250	300	50.0 AA STEP	50	1	0	0	1	1	-0.02	0.7147	0	1	VSDATGQMNLTK	VSDATGQMNLTK VSDATGQMNLTK	2	0	0	1	1
HEL-S-69p	Peptidyl-prolyl cis-trans isomerase	V9HWF5_HUMAN	50Step_Domain_p100.0_to_150.0	100	150	50.0 AA STEP	50	0	2	3	2	3	0	1	2	2	EGMNIVEAMER EGMNIVEAMER	EGMNIVEAMER EGMNIVEAMER	0	3	2	3	2
HEL-S-69p	Peptidyl-prolyl cis-trans isomerase	V9HWF5_HUMAN	50Step_Domain_p50.0_to_100.0	50	100	50.0 AA STEP	50	3	1	0	2	3	-0.02	0.8648	1	2	FEDENFILK FEDENFILK	FEDENFILK FEDENFILK	1	2	0	3	2
HEL-S-69p	Peptidyl-prolyl cis-trans isomerase	V9HWF5_HUMAN	50Step_Domain_p0_to_50	0	50	50.0 AA STEP	50	3	2	3	1	0	0.06	0.1284	3	0	VSFELFADK VSFELFADK VSFELFADKVPK VSFELFADK	VSFELFADK	1	4	2	1	0
HEL-S-7	Annexin	V9HWE0_HUMAN	50Step_Domain_p100.0_to_150.0	100	150	50.0 AA STEP	50	8	5	5	6	10	-0.04	1	6	8	QVYEEEYGSSLEDDVVGDTSGYYQR VLTEIIASR QVYEEEYGSSLEDDVVGDTSGYYQR VLTEIIASR QVYEEEYGSSLEDDVVGDTSGYYQR VLTEIIASR	QVYEEEYGSSLEDDVVGDTSGYYQR VLTEIIASR QVYEEEYGSSLEDDVVGDTSGYYQR VLTEIIASR	4	4	4	9	8
HEL-S-7	Annexin	V9HWE0_HUMAN	50Step_Domain_p0_to_50	0	50	50.0 AA STEP	50	4	9	8	10	5	-0.02	1	7	8	GTVTDFPGFDER GLGTDEESILTLLTSR GTVTDFPGFDER GLGTDEESILTLLTSR GTVTDFPGFDER	GLGTDEESILTLLTSR GTVTDFPGFDER GLGTDEESILTLLTSR GTVTDFPGFDER	2	7	7	15	4
HEL-S-7	Annexin	V9HWE0_HUMAN	50Step_Domain_p150.0_to_200.0	150	200	50.0 AA STEP	50	6	4	6	6	7	-0.02	1	5	6	FITIFGTR QVYEEEYGSSLEDDVVGDTSGYYQR FITIFGTR QVYEEEYGSSLEDDVVGDTSGYYQR DPDAGIDEAQVEQDAQALFQAGELK FITIFGTR QVYEEEYGSSLEDDVVGDTSGYYQR	DPDAGIDEAQVEQDAQALFQAGELK FITIFGTR QVYEEEYGSSLEDDVVGDTSGYYQR DPDAGIDEAQVEQDAQALFQAGELK FITIFGTR QVYEEEYGSSLEDDVVGDTSGYYQR	3	3	5	9	5
HEL-S-7	Annexin	V9HWE0_HUMAN	50Step_Domain_p250.0_to_300.0	250	300	50.0 AA STEP	50	6	8	8	3	7	0.04	0.9877	7	5	SEIDLFNIR SIPAYLAETLYYAMK SEIDLFNIR SIPAYLAETLYYAMK SEIDLFNIR SIPAYLAETLYYAMK	NFATSLYSMIK SEIDLFNIR SEIDLFNIR SIPAYLAETLYYAMK	3	6	7	5	5
HEL-S-7	Annexin	V9HWE0_HUMAN	50Step_Domain_p50.0_to_100.0	50	100	50.0 AA STEP	50	2	1	2	4	3	-0.04	1	2	4	QEISAAFK LYDAYELK LYDAYELK QEISAAFK	LYDAYELK QEISAAFK LYDAYELK QEISAAFK	1	1	2	6	2
HEL-S-7	Annexin	V9HWE0_HUMAN	50Step_Domain_p200.0_to_250.0	200	250	50.0 AA STEP	50	8	9	9	2	4	0.12	0.0091	9	3	ETSGNLEQLLLAVVK FITIFGTR SIPAYLAETLYYAMK YMTISGFQIEETIDR ETSGNLEQLLLAVVK FITIFGTR SIPAYLAETLYYAMK ETSGNLEQLLLAVVK FITIFGTR SIPAYLAETLYYAMK	FITIFGTR YMTISGFQIEETIDR FITIFGTR SIPAYLAETLYYAMK	4	7	8	3	3
HEL-S-89n	78 kDa glucose-regulated protein	V9HWB4_HUMAN	50Step_Domain_p150.0_to_200.0	150	200	50.0 AA STEP	50	4	6	4	5	3	0.02	1	5	4	ETAEAYLGK IINEPTAAAIAYGLDK DAGTIAGLNVMR IINEPTAAAIAYGLDK TFAPEEISAMVLTK DAGTIAGLNVMR IINEPTAAAIAYGLDK TFAPEEISAMVLTK	DAGTIAGLNVMR IINEPTAAAIAYGLDK IINEPTAAAIAYGLDK	3	5	3	6	3
HEL-S-89n	78 kDa glucose-regulated protein	V9HWB4_HUMAN	50Step_Domain_p50.0_to_100.0	50	100	50.0 AA STEP	50	4	2	2	3	4	-0.02	1	3	4	ITPSYVAFTPEGER VEIIANDQGNR NQLTSNPENTVFDAK VEIIANDQGNR ITPSYVAFTPEGER VEIIANDQGNR	ITPSYVAFTPEGER NQLTSNPENTVFDAK VEIIANDQGNR ITPSYVAFTPEGER NQLTSNPENTVFDAK VEIIANDQGNR	3	2	2	4	4
HEL-S-89n	78 kDa glucose-regulated protein	V9HWB4_HUMAN	50Step_Domain_p200.0_to_250.0	200	250	50.0 AA STEP	50	3	4	1	4	3	-0.02	1	3	4	IINEPTAAAIAYGLDK IINEPTAAAIAYGLDK IINEPTAAAIAYGLDK	IINEPTAAAIAYGLDK IINEPTAAAIAYGLDK	2	3	1	5	3
HEL-S-89n	78 kDa glucose-regulated protein	V9HWB4_HUMAN	50Step_Domain_p450.0_to_500.0	450	500	50.0 AA STEP	50	0	0	1	2	4	-0.06	0.0392	0	3	SQIFSTASDNQPTVTIK	DNHLLGTFDLTGIPPAPR SQIFSTASDNQPTVTIK SQIFSTASDNQPTVTIK	0	0	1	2	4
HEL-S-89n	78 kDa glucose-regulated protein	V9HWB4_HUMAN	50Step_Domain_p400.0_to_450.0	400	450	50.0 AA STEP	50	0	0	1	1	4	-0.04	0.1904	0	2	SQIFSTASDNQPTVTIK	SQIFSTASDNQPTVTIK SQIFSTASDNQPTVTIK	0	0	1	1	4
HEL-S-89n	78 kDa glucose-regulated protein	V9HWB4_HUMAN	50Step_Domain_p0_to_50	0	50	50.0 AA STEP	50	3	1	1	2	1	0	1	2	2	VEIIANDQGNR VEIIANDQGNR VEIIANDQGNR	VEIIANDQGNR VEIIANDQGNR	2	1	1	2	1
HEL-S-89n	78 kDa glucose-regulated protein	V9HWB4_HUMAN	50Step_Domain_p600.0_to_650.0	600	650	50.0 AA STEP	50	0	1	2	2	1	-0.02	1	1	2	IEWLESHQDADIEDFK LYGSAGPPPTGEEDTAEKDEL	IEWLESHQDADIEDFK KELEEIVQPIISK LYGSAGPPPTGEEDTAEKDEL LYGSAGPPPTGEEDTAEKDEL	0	1	2	3	1
HEL-S-89n	78 kDa glucose-regulated protein	V9HWB4_HUMAN	50Step_Domain_p500.0_to_550.0	500	550	50.0 AA STEP	50	3	0	1	1	1	0	1	1	1	LTPEEIER LTPEEIER	LTPEEIER LTPEEIER	2	0	1	1	1
HEL-S-89n	78 kDa glucose-regulated protein	V9HWB4_HUMAN	50Step_Domain_p550.0_to_600.0	550	600	50.0 AA STEP	50	0	1	1	0	2	0	1	1	1	NELESYAYSLK NELESYAYSLK	NELESYAYSLK	0	1	1	0	2
HEL-S-89n	78 kDa glucose-regulated protein	V9HWB4_HUMAN	50Step_Domain_p300.0_to_350.0	300	350	50.0 AA STEP	50	1	1	0	1	0	0.02	1	1	0	FEELNMDLFR FEELNMDLFR	IEIESFYEGEDFSETLTR	1	1	0	1	0
HEL-S-99n	Calreticulin	V9HW88_HUMAN	50Step_Domain_p200.0_to_250.0	200	250	50.0 AA STEP	50	0	2	0	1	1	0	1	1	1	IDDPTDSKPEDWDKPEHIPDPDAK IKDPDASKPEDWDER	IDNSQVESGSLEDDWDFLPPK IDNSQVESGSLEDDWDFLPPK	0	2	0	2	1
HHIPL1	HHIP-like protein 1	HIPL1_HUMAN	50Step_Domain_p400.0_to_450.0	400	450	50.0 AA STEP	50	0	2	1	0	2	0	1	1	1	FEEVDVVER FEEVDVVER	FEEVDVVER	0	1	1	0	1
HHIPL1	HHIP-like protein 1	HIPL1_HUMAN	50Step_Domain_p250.0_to_300.0	250	300	50.0 AA STEP	50	1	0	0	0	2	-0.02	1	0	1	VSEDDENAVDHSSER	VSEDDENAVDHSSER	1	0	0	0	1
HHIPL1	HHIP-like protein 1	HIPL1_HUMAN	50Step_Domain_p300.0_to_350.0	300	350	50.0 AA STEP	50	1	0	0	0	2	-0.02	1	0	1	VSEDDENAVDHSSER	VSEDDENAVDHSSER	1	0	0	0	1
HHIPL2	HHIP-like protein 2	HIPL2_HUMAN	50Step_Domain_p250.0_to_300.0	250	300	50.0 AA STEP	50	7	6	6	3	3	0.06	0	6	3	LEQPFLDLK NIVLTTPWIGDER LEQPFLDLK LEQPFLDLK	LEQPFLDLK LEQPFLDLK	3	2	2	4	5
HHIPL2	HHIP-like protein 2	HIPL2_HUMAN	50Step_Domain_p500.0_to_550.0	500	550	50.0 AA STEP	50	2	0	3	3	3	-0.02	0.495	2	3	LMALQEDR LMALQEDR	LMALQEDR SVTGGYVYR LMALQEDR	1	0	1	3	5
HHIPL2	HHIP-like protein 2	HIPL2_HUMAN	50Step_Domain_p450.0_to_500.0	450	500	50.0 AA STEP	50	0	3	0	3	2	-0.02	0.258	1	2	FEEVDLILK	FEEVDLILK SVTGGYVYR FEEVDLILK	0	1	0	3	3
HHIPL2	HHIP-like protein 2	HIPL2_HUMAN	50Step_Domain_p400.0_to_450.0	400	450	50.0 AA STEP	50	0	3	0	2	2	-0.02	1	1	2	FEEVDLILK	FEEVDLILK FEEVDLILK	0	1	0	2	3
HIST1H2BJ	Histone H2B	A0A024RCJ2_HUMAN	50Step_Domain_p100.0_to_126.0	100	126	50.0 AA STEP	26	3	3	4	3	4	-0.0384615	1	3	4	LLLPGELAK LLLPGELAK LLLPGELAK	LLLPGELAK LLLPGELAK	1	3	5	5	3
HIST1H2BJ	Histone H2B	A0A024RCJ2_HUMAN	50Step_Domain_p50.0_to_100.0	50	100	50.0 AA STEP	50	6	6	5	4	0	0.08	0.0201	6	2	AMGIMNSFVNDIFER AMGIMNSFVNDIFER AMGIMNSFVNDIFER	AMGIMNSFVNDIFER QVHPDTGISSK	2	7	6	7	0
HSPA5	Endoplasmic reticulum chaperone BiP	BIP_HUMAN	50Step_Domain_p150.0_to_200.0	150	200	50.0 AA STEP	50	4	6	4	5	3	0.02	1	5	4	ETAEAYLGK IINEPTAAAIAYGLDK DAGTIAGLNVMR IINEPTAAAIAYGLDK TFAPEEISAMVLTK DAGTIAGLNVMR IINEPTAAAIAYGLDK TFAPEEISAMVLTK	DAGTIAGLNVMR IINEPTAAAIAYGLDK IINEPTAAAIAYGLDK	3	5	3	6	3
HSPA5	Endoplasmic reticulum chaperone BiP	BIP_HUMAN	50Step_Domain_p50.0_to_100.0	50	100	50.0 AA STEP	50	4	2	2	3	4	-0.02	1	3	4	ITPSYVAFTPEGER VEIIANDQGNR NQLTSNPENTVFDAK VEIIANDQGNR ITPSYVAFTPEGER VEIIANDQGNR	ITPSYVAFTPEGER NQLTSNPENTVFDAK VEIIANDQGNR ITPSYVAFTPEGER NQLTSNPENTVFDAK VEIIANDQGNR	3	2	2	4	4
HSPA5	Endoplasmic reticulum chaperone BiP	BIP_HUMAN	50Step_Domain_p200.0_to_250.0	200	250	50.0 AA STEP	50	3	4	1	4	3	-0.02	1	3	4	IINEPTAAAIAYGLDK IINEPTAAAIAYGLDK IINEPTAAAIAYGLDK	IINEPTAAAIAYGLDK IINEPTAAAIAYGLDK	2	3	1	5	3
HSPA5	Endoplasmic reticulum chaperone BiP	BIP_HUMAN	50Step_Domain_p450.0_to_500.0	450	500	50.0 AA STEP	50	0	0	1	2	4	-0.06	0.0392	0	3	SQIFSTASDNQPTVTIK	DNHLLGTFDLTGIPPAPR SQIFSTASDNQPTVTIK SQIFSTASDNQPTVTIK	0	0	1	2	4
HSPA5	Endoplasmic reticulum chaperone BiP	BIP_HUMAN	50Step_Domain_p400.0_to_450.0	400	450	50.0 AA STEP	50	0	0	1	1	4	-0.04	0.1904	0	2	SQIFSTASDNQPTVTIK	SQIFSTASDNQPTVTIK SQIFSTASDNQPTVTIK	0	0	1	1	4
HSPA5	Endoplasmic reticulum chaperone BiP	BIP_HUMAN	50Step_Domain_p0_to_50	0	50	50.0 AA STEP	50	3	1	1	2	1	0	1	2	2	VEIIANDQGNR VEIIANDQGNR VEIIANDQGNR	VEIIANDQGNR VEIIANDQGNR	2	1	1	2	1
HSPA5	Endoplasmic reticulum chaperone BiP	BIP_HUMAN	50Step_Domain_p600.0_to_650.0	600	650	50.0 AA STEP	50	0	1	2	2	1	-0.02	1	1	2	IEWLESHQDADIEDFK LYGSAGPPPTGEEDTAEKDEL	IEWLESHQDADIEDFK KELEEIVQPIISK LYGSAGPPPTGEEDTAEKDEL LYGSAGPPPTGEEDTAEKDEL	0	1	2	3	1
HSPA5	Endoplasmic reticulum chaperone BiP	BIP_HUMAN	50Step_Domain_p500.0_to_550.0	500	550	50.0 AA STEP	50	3	0	1	1	1	0	1	1	1	LTPEEIER LTPEEIER	LTPEEIER LTPEEIER	2	0	1	1	1
HSPA5	Endoplasmic reticulum chaperone BiP	BIP_HUMAN	50Step_Domain_p550.0_to_600.0	550	600	50.0 AA STEP	50	0	1	1	0	2	0	1	1	1	NELESYAYSLK NELESYAYSLK	NELESYAYSLK	0	1	1	0	2
HSPA5	Endoplasmic reticulum chaperone BiP	BIP_HUMAN	50Step_Domain_p300.0_to_350.0	300	350	50.0 AA STEP	50	1	1	0	1	0	0.02	1	1	0	FEELNMDLFR FEELNMDLFR	IEIESFYEGEDFSETLTR	1	1	0	1	0
IGFBP7	Insulin-like growth factor-binding protein 7	IBP7_HUMAN	50Step_Domain_p250.0_to_282.0	250	282	50.0 AA STEP	32	2	0	0	2	3	-0.03125	0.0042	1	2	ITVVDALHEIPVK	ITVVDALHEIPVK EDAGEYECHASNSQGQASASAK ITVVDALHEIPVK	2	0	0	2	6
IGFBP7	Insulin-like growth factor-binding protein 7	IBP7_HUMAN	50Step_Domain_p200.0_to_250.0	200	250	50.0 AA STEP	50	1	0	0	2	1	-0.04	0.1074	0	2	TELLPGDR	TELLPGDR TELLPGDRDNLAIQTR EDAGEYECHASNSQGQASASAK	1	0	0	2	1
IGK@	IGK@ protein	Q6P5S8_HUMAN	50Step_Domain_p150.0_to_200.0	150	200	50.0 AA STEP	50	73	62	72	82	78	-0.22	0.382	69	80	DSTYSLSSTLTLSK SGTASVVCLLNNFYPR VDNALQSGNSQESVTEQDSK VDNALQSGNSQESVTEQDSKDSTYSLSSTLTLSK VQWKVDNALQSGNSQESVTEQDSK DSTYSLSSTLTLSK DSTYSLSSTLTLSKADYEK SGTASVVCLLNNFYPR VDNALQSGNSQESVTEQDSK VDNALQSGNSQESVTEQDSKDSTYSLSSTLTLSK DSTYSLSSTLTLSK SGTASVVCLLNNFYPR VDNALQSGNSQESVTEQDSK	DSTYSLSSTLTLSK VDNALQSGNSQESVTEQDSK DSTYSLSSTLTLSK VDNALQSGNSQESVTEQDSK	134	115	47	12	13
IGK@	IGK@ protein	Q6P5S8_HUMAN	50Step_Domain_p100.0_to_150.0	100	150	50.0 AA STEP	50	22	40	37	14	18	0.34	0.0505	33	16	SGTASVVCLLNNFYPR TVAAPSVFIFPPSDEQLK SGTASVVCLLNNFYPR TVAAPSVFIFPPSDEQLK SGTASVVCLLNNFYPR TVAAPSVFIFPPSDEQLK	TVAAPSVFIFPPSDEQLK TVAAPSVFIFPPSDEQLK	40	75	24	2	3
IGK@	IGK@ protein	Q6P5S8_HUMAN	50Step_Domain_p200.0_to_236.0	200	236	50.0 AA STEP	36	55	35	34	14	6	0.861111	0.0005	41	10	DSTYSLSSTLTLSK VDNALQSGNSQESVTEQDSKDSTYSLSSTLTLSK VYACEVTHQGLSSPVTK DSTYSLSSTLTLSK DSTYSLSSTLTLSKADYEK VDNALQSGNSQESVTEQDSKDSTYSLSSTLTLSK VYACEVTHQGLSSPVTK DSTYSLSSTLTLSK	DSTYSLSSTLTLSK DSTYSLSSTLTLSK	100	64	22	2	1
INHBA	Inhibin beta A chain	INHBA_HUMAN	50Step_Domain_p150.0_to_200.0	150	200	50.0 AA STEP	50	11	13	13	15	11	-0.02	1	12	13	AEVWLFLK EGSDLSVVER AEVWLFLK EGSDLSVVER HPQGSLDTGEEAEEVGLK HPQGSLDTGEEAEEVGLKGER AEVWLFLK EGSDLSVVER HPQGSLDTGEEAEEVGLK	EGSDLSVVER EGSDLSVVER	10	9	20	7	5
INHBA	Inhibin beta A chain	INHBA_HUMAN	50Step_Domain_p100.0_to_150.0	100	150	50.0 AA STEP	50	8	7	9	15	11	-0.1	0	8	13	EGSDLSVVER AEMNELMEQTSEIITFAESGTAR EGSDLSVVER AEMNELMEQTSEIITFAESGTAR EGSDLSVVER	EGSDLSVVER EGSDLSVVER	8	5	14	7	5
INHBA	Inhibin beta A chain	INHBA_HUMAN	50Step_Domain_p200.0_to_250.0	200	250	50.0 AA STEP	50	3	3	1	2	4	-0.02	1	2	3	SELLLSEK STWHVFPVSSSIQR HPQGSLDTGEEAEEVGLKGER SELLLSEK SELLLSEK	STWHVFPVSSSIQR SELLLSEK	3	2	1	1	2
INHBA	Inhibin beta A chain	INHBA_HUMAN	50Step_Domain_p50.0_to_100.0	50	100	50.0 AA STEP	50	3	1	1	0	2	0.02	1	2	1	AALLNAIR DVPNSQPEMVEAVK RPDVTQPVPK AALLNAIR AALLNAIR DVPNSQPEMVEAVK	DVPNSQPEMVEAVK	3	1	2	0	1
INHBA	Inhibin beta A chain	INHBA_HUMAN	50Step_Domain_p0_to_50	0	50	50.0 AA STEP	50	1	0	1	0	2	0	1	1	1	DVPNSQPEMVEAVK DVPNSQPEMVEAVK	DVPNSQPEMVEAVK	1	0	1	0	1
IQGAP1	Ras GTPase-activating-like protein IQGAP1	IQGA1_HUMAN	50Step_Domain_p1450.0_to_1500.0	1450	1500	50.0 AA STEP	50	1	2	0	1	0	0.02	1	1	0	EDSNLTLQEK LTELGTVDPK YQELINDIAR	LTELGTVDPK	1	2	0	1	0
IQGAP1	Ras GTPase-activating-like protein IQGAP1	IQGA1_HUMAN	50Step_Domain_p500.0_to_550.0	500	550	50.0 AA STEP	50	0	2	0	1	0	0.02	1	1	0	ILAIGLINEALDEGDAQK	ILAIGLINEALDEGDAQK	0	2	0	2	0
IQGAP1	Ras GTPase-activating-like protein IQGAP1	IQGA1_HUMAN	50Step_Domain_p550.0_to_600.0	550	600	50.0 AA STEP	50	0	2	0	1	0	0.02	1	1	0	ILAIGLINEALDEGDAQK	ILAIGLINEALDEGDAQK	0	2	0	2	0
IQGAP1	Ras GTPase-activating-like protein IQGAP1	IQGA1_HUMAN	50Step_Domain_p850.0_to_900.0	850	900	50.0 AA STEP	50	1	1	0	1	0	0.02	1	1	0	EEVITLIR EEVITLIR	EEVITLIR	1	1	0	1	0
IQGAP1	Ras GTPase-activating-like protein IQGAP1	IQGA1_HUMAN	50Step_Domain_p900.0_to_950.0	900	950	50.0 AA STEP	50	1	1	0	1	0	0.02	1	1	0	EEVITLIR EEVITLIR	EEVITLIR	1	1	0	1	0
IQGAP1	Ras GTPase-activating-like protein IQGAP1	IQGA1_HUMAN	50Step_Domain_p1000.0_to_1050.0	1000	1050	50.0 AA STEP	50	1	1	0	1	0	0.02	1	1	0	TALQEEIK VDQIQEIVTGNPTVIK	TALQEEIK VDQIQEIVTGNPTVIK	1	1	0	2	0
IQGAP1	Ras GTPase-activating-like protein IQGAP1	IQGA1_HUMAN	50Step_Domain_p450.0_to_500.0	450	500	50.0 AA STEP	50	1	0	0	1	0	0	1	0	0	ALESGDVNTVWK	ALESGDVNTVWK	1	0	0	1	0
IQGAP1	Ras GTPase-activating-like protein IQGAP1	IQGA1_HUMAN	50Step_Domain_p1050.0_to_1100.0	1050	1100	50.0 AA STEP	50	0	1	0	1	0	0	1	0	0	VDQIQEIVTGNPTVIK	VDQIQEIVTGNPTVIK	0	1	0	1	0
ISLR	Immunoglobulin superfamily containing leucine-rich repeat protein	ISLR_HUMAN	50Step_Domain_p100.0_to_150.0	100	150	50.0 AA STEP	50	2	2	3	4	3	-0.04	0.0432	2	4	MDSNELTFIPR TVAAGALASLSHLK MDSNELTFIPR MDSNELTFIPR	MDSNELTFIPR MDSNELTFIPR TVAAGALASLSHLK	2	2	4	2	3
ISLR	Immunoglobulin superfamily containing leucine-rich repeat protein	ISLR_HUMAN	50Step_Domain_p50.0_to_100.0	50	100	50.0 AA STEP	50	3	3	2	2	3	0.02	1	3	2	LPGLPEGAFR TVAAGALASLSHLK EVPLLQSLWLAHNEIR LPGLPEGAFR EVPLLQSLWLAHNEIR LPGLPEGAFR	LPGLPEGAFR LPGLPEGAFR TVAAGALASLSHLK	3	4	3	1	3
ISLR	Immunoglobulin superfamily containing leucine-rich repeat protein	ISLR_HUMAN	50Step_Domain_p250.0_to_300.0	250	300	50.0 AA STEP	50	2	1	1	0	1	0.02	0.3321	1	0	ALPGTPVASSQPR ALPGTPVASSQPR ALPGTPVASSQPR	ALPGTPVASSQPR	2	1	1	0	1
ISLR	Immunoglobulin superfamily containing leucine-rich repeat protein	ISLR_HUMAN	50Step_Domain_p300.0_to_350.0	300	350	50.0 AA STEP	50	2	1	1	0	1	0.02	0.3321	1	0	ALPGTPVASSQPR ALPGTPVASSQPR ALPGTPVASSQPR	ALPGTPVASSQPR	2	1	1	0	1
KRT5	Keratin; type II cytoskeletal 5	K2C5_HUMAN	50Step_Domain_p0_to_50	0	50	50.0 AA STEP	50	1	0	0	1	1	-0.02	0.006	0	1	SFSTASAITPSVSR	SFSTASAITPSVSR SFSTASAITPSVSR	1	0	0	1	1
KRT5	Keratin; type II cytoskeletal 5	K2C5_HUMAN	50Step_Domain_p50.0_to_100.0	50	100	50.0 AA STEP	50	1	0	0	1	1	-0.02	0.006	0	1	ISISTSGGSFR	ISISTSGGSFR ISISTSGGSFR	1	0	0	1	2
KRT8	Keratin; type II cytoskeletal 8	K2C8_HUMAN	50Step_Domain_p150.0_to_200.0	150	200	50.0 AA STEP	50	0	0	12	4	7	-0.04	1	4	6	DVDEAYMNK TEMENEFVLIK	DVDEAYMNK LEAELGNMQGLVEDFK TEMENEFVLIK DVDEAYMNK KDVDEAYMNK LEAELGNMQGLVEDFK QLETLGQEK TEMENEFVLIK YEDEINKR	0	0	3	8	14
KRT8	Keratin; type II cytoskeletal 8	K2C8_HUMAN	50Step_Domain_p200.0_to_250.0	200	250	50.0 AA STEP	50	0	20	8	4	5	0.1	1	9	4	LEGLTDEINFLR QLYEEEIR DVDEAYMNK LEGLTDEINFLR	DVDEAYMNK ELQSQISDTSVVLSMDNSR LEGLTDEINFLR QLYEEEIR DVDEAYMNK KDVDEAYMNK LEGLTDEINFLR QLYEEEIR	0	4	2	7	9
KRT8	Keratin; type II cytoskeletal 8	K2C8_HUMAN	50Step_Domain_p300.0_to_350.0	300	350	50.0 AA STEP	50	0	0	4	4	3	-0.06	1	1	4	ASLEAAIADAEQR	ASLEAAIADAEQR LQAEIEGLK TEISEMNR ASLEAAIADAEQR LQAEIEGLK TEISEMNR	0	0	1	8	6
LOXL3	Lysyl oxidase homolog 3	LOXL3_HUMAN	50Step_Domain_p400.0_to_450.0	400	450	50.0 AA STEP	50	1	2	1	1	3	-0.02	1	1	2	VEVQIGGPGPLR VEVQIGGPGPLR VEVQIGGPGPLR	VEVQIGGPGPLR VEVQIGGPGPLR	1	2	1	1	2
LOXL3	Lysyl oxidase homolog 3	LOXL3_HUMAN	50Step_Domain_p50.0_to_100.0	50	100	50.0 AA STEP	50	1	0	1	2	2	-0.02	0.0368	1	2	ELGFTEATGWTHSAK ELGFTEATGWTHSAK	ELGFTEATGWTHSAK ELGFTEATGWTHSAK	1	0	1	2	1
LOXL3	Lysyl oxidase homolog 3	LOXL3_HUMAN	50Step_Domain_p150.0_to_200.0	150	200	50.0 AA STEP	50	0	2	0	2	0	0	1	1	1	LPGFSDSNVIEVEHHLQVEEVR RPLPVTEGLVEVR	RPLPVTEGLVEVR	0	2	0	2	0
LOXL3	Lysyl oxidase homolog 3	LOXL3_HUMAN	50Step_Domain_p550.0_to_600.0	550	600	50.0 AA STEP	50	1	0	1	1	0	0.02	1	1	0	FSSQIHNLGR FSSQIHNLGR	FSSQIHNLGR	1	0	1	1	0
LRP1	Prolow-density lipoprotein receptor-related protein 1	LRP1_HUMAN	50Step_Domain_p3200.0_to_3250.0	3200	3250	50.0 AA STEP	50	1	1	0	2	1	-0.02	1	1	2	EDYIEFASLDGSNR EDYIEFASLDGSNR	EDYIEFASLDGSNR EDYIEFASLDGSNR	1	1	0	1	1
LRP1	Prolow-density lipoprotein receptor-related protein 1	LRP1_HUMAN	50Step_Domain_p3000.0_to_3050.0	3000	3050	50.0 AA STEP	50	1	0	2	2	0	0	1	1	1	AVTDEEPFLIFANR AVTDEEPFLIFANR	AVTDEEPFLIFANR	1	0	1	1	0
LRP1	Prolow-density lipoprotein receptor-related protein 1	LRP1_HUMAN	50Step_Domain_p2200.0_to_2250.0	2200	2250	50.0 AA STEP	50	1	1	0	0	2	0	1	1	1	EYAGYLLYSER NVIALAFDYR	EYAGYLLYSER	1	2	0	0	2
LRP1	Prolow-density lipoprotein receptor-related protein 1	LRP1_HUMAN	50Step_Domain_p2250.0_to_2300.0	2250	2300	50.0 AA STEP	50	0	0	2	2	0	0	1	1	1	IFFSDIHFGNIQQINDDGSR	ITIVENVGSVEGLAYHR	0	0	1	1	0
LRP1	Prolow-density lipoprotein receptor-related protein 1	LRP1_HUMAN	50Step_Domain_p2150.0_to_2200.0	2150	2200	50.0 AA STEP	50	1	0	0	0	2	-0.02	1	0	1	EYAGYLLYSER	EYAGYLLYSER	1	0	0	0	2
LRP1	Prolow-density lipoprotein receptor-related protein 1	LRP1_HUMAN	50Step_Domain_p2050.0_to_2100.0	2050	2100	50.0 AA STEP	50	1	0	2	0	1	0.02	1	1	0	IDLETGENR IDLETGENR	IDLETGENR	1	0	1	0	1
LTBP2	Latent-transforming growth factor beta-binding protein 2	LTBP2_HUMAN	50Step_Domain_p50.0_to_100.0	50	100	50.0 AA STEP	50	1	3	1	4	3	-0.04	0	2	4	EQDAPVAGLQPVER EQDAPVAGLQPVER EQDAPVAGLQPVER	AQPGWGSPR EQDAPVAGLQPVER EQDAPVAGLQPVER RPTEAEAR	1	2	1	4	4
LUM	Lumican	LUM_HUMAN	50Step_Domain_p200.0_to_250.0	200	250	50.0 AA STEP	50	45	37	45	62	42	-0.2	1	42	52	FNALQYLR ISNIPDEYFK LPSGLPVSLLTLYLDNNK FNALQYLR ISNIPDEYFK LPSGLPVSLLTLYLDNNK FNALQYLR ISNIPDEYFK LPSGLPVSLLTLYLDNNK	FNALQYLR ISNIPDEYFK ISNIPDEYFKR LPSGLPVSLLTLYLDNNK FNALQYLR ISNIPDEYFK LPSGLPVSLLTLYLDNNK	35	25	49	61	56
LUM	Lumican	LUM_HUMAN	50Step_Domain_p100.0_to_150.0	100	150	50.0 AA STEP	50	26	10	47	37	42	-0.24	1	28	40	SLEDLQLTHNK AFENVTDLQWLILDHNLLENSK SLEDLQLTHNK SLEDLQLTHNK	SLEDLQLTHNK SLEDLQLTHNK	20	7	52	37	55
LUM	Lumican	LUM_HUMAN	50Step_Domain_p50.0_to_100.0	50	100	50.0 AA STEP	50	27	44	29	32	46	-0.12	1	33	39	SVPMVPPGIK AFENVTDLQWLILDHNLLENSK SVPMVPPGIK NNQIDHIDEK SVPMVPPGIK	NNQIDHIDEK SVPMVPPGIK NNQIDHIDEK SVPMVPPGIK	21	30	32	32	61
LUM	Lumican	LUM_HUMAN	50Step_Domain_p150.0_to_200.0	150	200	50.0 AA STEP	50	84	70	58	49	28	0.66	0.0175	71	38	EDAVSAAFK LKEDAVSAAFK LPSGLPVSLLTLYLDNNK SLEYLDLSFNQIAR EDAVSAAFK LKEDAVSAAFK LPSGLPVSLLTLYLDNNK SLEYLDLSFNQIAR EDAVSAAFK LKEDAVSAAFK LPSGLPVSLLTLYLDNNK SLEYLDLSFNQIAR	EDAVSAAFK LPSGLPVSLLTLYLDNNK SLEYLDLSFNQIAR EDAVSAAFK LKEDAVSAAFK LPSGLPVSLLTLYLDNNK SLEYLDLSFNQIAR	65	48	64	49	37
LUM	Lumican	LUM_HUMAN	50Step_Domain_p250.0_to_300.0	250	300	50.0 AA STEP	50	21	43	31	31	46	-0.12	1	32	38	ILGPLSYSK NIPTVNENLENYYLEVNQLEK ILGPLSYSK NIPTVNENLENYYLEVNQLEK ILGPLSYSK NIPTVNENLENYYLEVNQLEK	ILGPLSYSK NIPTVNENLENYYLEVNQLEK ILGPLSYSK NIPTVNENLENYYLEVNQLEK	16	29	34	31	60
LUM	Lumican	LUM_HUMAN	50Step_Domain_p300.0_to_338.0	300	338	50.0 AA STEP	38	10	15	21	17	23	-0.131579	1	15	20	ILGPLSYSK ILGPLSYSK VANEVTLN ILGPLSYSK ISETSLPPDMYECLR VANEVTLN	ILGPLSYSK ISETSLPPDMYECLR VANEVTLN ILGPLSYSK VANEVTLN	8	10	23	17	30
MATN3	Matrilin-3	MATN3_HUMAN	50Step_Domain_p100.0_to_150.0	100	150	50.0 AA STEP	50	9	11	14	11	10	0.02	1	11	10	IIDTLDIGPADTR VAVVNYASTVK IIDTLDIGPADTR VAVVNYASTVK IIDTLDIGPADTR VAVVNYASTVK	IEFQLQAYTDK IIDTLDIGPADTR VAVVNYASTVK IEFQLQAYTDK IIDTLDIGPADTR VAVVNYASTVK	2	4	3	9	18
MATN3	Matrilin-3	MATN3_HUMAN	50Step_Domain_p200.0_to_250.0	200	250	50.0 AA STEP	50	4	3	0	1	2	0	1	2	2	AQASGIELYAVGVDR AQASGIELYAVGVDR	AQASGIELYAVGVDR AQASGIELYAVGVDR VAIIVTDGRPQDQVNEVAAR	1	1	0	1	3
Meflin	Mesenchymal stromal cell-and fibroblast-expressing Linx paralogue	A0A146E5L3_HUMAN	50Step_Domain_p100.0_to_150.0	100	150	50.0 AA STEP	50	2	2	3	4	3	-0.04	0.0432	2	4	MDSNELTFIPR TVAAGALASLSHLK MDSNELTFIPR MDSNELTFIPR	MDSNELTFIPR MDSNELTFIPR TVAAGALASLSHLK	2	2	4	2	3
Meflin	Mesenchymal stromal cell-and fibroblast-expressing Linx paralogue	A0A146E5L3_HUMAN	50Step_Domain_p50.0_to_100.0	50	100	50.0 AA STEP	50	3	3	2	2	3	0.02	1	3	2	LPGLPEGAFR TVAAGALASLSHLK EVPLLQSLWLAHNEIR LPGLPEGAFR EVPLLQSLWLAHNEIR LPGLPEGAFR	LPGLPEGAFR LPGLPEGAFR TVAAGALASLSHLK	3	4	3	1	3
Meflin	Mesenchymal stromal cell-and fibroblast-expressing Linx paralogue	A0A146E5L3_HUMAN	50Step_Domain_p250.0_to_300.0	250	300	50.0 AA STEP	50	2	1	1	0	1	0.02	0.3321	1	0	ALPGTPVASSQPR ALPGTPVASSQPR ALPGTPVASSQPR	ALPGTPVASSQPR	2	1	1	0	1
Meflin	Mesenchymal stromal cell-and fibroblast-expressing Linx paralogue	A0A146E5L3_HUMAN	50Step_Domain_p300.0_to_350.0	300	350	50.0 AA STEP	50	2	1	1	0	1	0.02	0.3321	1	0	ALPGTPVASSQPR ALPGTPVASSQPR ALPGTPVASSQPR	ALPGTPVASSQPR	2	1	1	0	1
MMP3	Stromelysin-1	MMP3_HUMAN	50Step_Domain_p400.0_to_450.0	400	450	50.0 AA STEP	50	0	2	1	3	3	-0.04	0.054	1	3	QIAEDFPGIDSK QIAEDFPGIDSK	QIAEDFPGIDSK TYFFVEDK QIAEDFPGIDSK	0	2	2	2	4
MMP3	Stromelysin-1	MMP3_HUMAN	50Step_Domain_p100.0_to_150.0	100	150	50.0 AA STEP	50	2	2	2	2	3	0	1	2	2	VWEEVTPLTFSR VWEEVTPLTFSR IVNYTPDLPK VWEEVTPLTFSR	VWEEVTPLTFSR DAVDSAVEK IVNYTPDLPK	1	2	3	1	5
MMP3	Stromelysin-1	MMP3_HUMAN	50Step_Domain_p50.0_to_100.0	50	100	50.0 AA STEP	50	4	1	3	3	0	0.02	0.903	3	2	FLGLEVTGK LDSDTLEVMR FLGLEVTGK FLGLEVTGK LDSDTLEVMR	LDSDTLEVMR	2	1	4	2	0
MMP3	Stromelysin-1	MMP3_HUMAN	50Step_Domain_p150.0_to_200.0	150	200	50.0 AA STEP	50	2	2	1	2	0	0.02	1	2	1	VWEEVTPLTFSR VWEEVTPLTFSR VWEEVTPLTFSR	VWEEVTPLTFSR	1	2	2	1	0
MMP3	Stromelysin-1	MMP3_HUMAN	50Step_Domain_p0_to_50	0	50	50.0 AA STEP	50	2	1	1	0	1	0.02	1	1	0	YLENYYDLK YLENYYDLK GEDTSMNLVQK YLENYYDLK	YLENYYDLK	1	1	2	0	1
MSN	Moesin	MOES_HUMAN	50Step_Domain_p50.0_to_100.0	50	100	50.0 AA STEP	50	2	5	3	2	4	0	1	3	3	FYPEDVSEELIQDITQR EVWFFGLQYQDTK FYPEDVSEELIQDITQR EVWFFGLQYQDTK	FYPEDVSEELIQDITQR FYPEDVSEELIQDITQR	2	5	2	2	6
MSN	Moesin	MOES_HUMAN	50Step_Domain_p400.0_to_450.0	400	450	50.0 AA STEP	50	4	2	2	3	1	0.02	1	3	2	AQMVQEDLEK ESEAVEWQQK ISQLEMAR AQMVQEDLEK TQEQLALEMAELTAR AQMVQEDLEK	ISQLEMAR TQEQLALEMAELTAR TQEQLALEMAELTAR	4	2	1	3	2
MSN	Moesin	MOES_HUMAN	50Step_Domain_p350.0_to_400.0	350	400	50.0 AA STEP	50	1	0	2	3	1	-0.02	1	1	2	ALELEQER ALELEQER	ALELEQER AQQELEEQTR ALELEQER AQQELEEQTR	1	0	1	3	2
MSN	Moesin	MOES_HUMAN	50Step_Domain_p150.0_to_200.0	150	200	50.0 AA STEP	50	2	2	2	2	1	0	1	2	2	EDAVLEYLK EDAVLEYLK EDAVLEYLK	EDAVLEYLK EDAVLEYLK	2	2	1	2	2
MSN	Moesin	MOES_HUMAN	50Step_Domain_p200.0_to_250.0	200	250	50.0 AA STEP	50	2	2	0	1	2	-0.02	1	1	2	IGFPWSEIR IGFPWSEIR	IGFPWSEIR IGFPWSEIR	2	2	0	1	3
MSN	Moesin	MOES_HUMAN	50Step_Domain_p250.0_to_300.0	250	300	50.0 AA STEP	50	1	0	2	1	1	0	1	1	1	APDFVFYAPR APDFVFYAPR	APDFVFYAPR APDFVFYAPR	1	0	1	1	1
MSN	Moesin	MOES_HUMAN	50Step_Domain_p0_to_50	0	50	50.0 AA STEP	50	1	4	5	0	1	0.06	0.0228	3	0	QLFDQVVK EVWFFGLQYQDTK QLFDQVVK EVWFFGLQYQDTK QLFDQVVK	QLFDQVVK	1	4	3	0	1
MXRA5	Matrix-remodeling-associated protein 5	MXRA5_HUMAN	50Step_Domain_p250.0_to_300.0	250	300	50.0 AA STEP	50	6	5	5	10	13	-0.14	0	5	12	SIEEEQEQEEDGGSQLILEK SIEEEQEQEEDGGSQLILEK SIEEEQEQEEDGGSQLILEK	SIEEEQEQEEDGGSQLILEK SIEEEQEQEEDGGSQLILEK	6	5	6	12	9
MXRA5	Matrix-remodeling-associated protein 5	MXRA5_HUMAN	50Step_Domain_p300.0_to_350.0	300	350	50.0 AA STEP	50	6	5	5	10	13	-0.14	0	5	12	SIEEEQEQEEDGGSQLILEK SIEEEQEQEEDGGSQLILEK SIEEEQEQEEDGGSQLILEK	SIEEEQEQEEDGGSQLILEK SIEEEQEQEEDGGSQLILEK	6	5	6	12	9
MXRA5	Matrix-remodeling-associated protein 5	MXRA5_HUMAN	50Step_Domain_p1950.0_to_2000.0	1950	2000	50.0 AA STEP	50	2	3	3	2	7	-0.02	0.7296	3	4	GTPAPQISWIFPDR VWQTVSPVEGR GTPAPQISWIFPDR VWQTVSPVEGR GTPAPQISWIFPDR VWQTVSPVEGR	GTPAPQISWIFPDR VWQTVSPVEGR GTPAPQISWIFPDR VWQTVSPVEGR	2	3	4	2	5
MXRA5	Matrix-remodeling-associated protein 5	MXRA5_HUMAN	50Step_Domain_p2200.0_to_2250.0	2200	2250	50.0 AA STEP	50	3	3	3	2	6	-0.02	1	3	4	VGDDYVVLK VGDDYVVLK VGDDYVVLK	VGDDYVVLK VGDDYVVLK	3	3	4	2	4
MXRA5	Matrix-remodeling-associated protein 5	MXRA5_HUMAN	50Step_Domain_p350.0_to_400.0	350	400	50.0 AA STEP	50	2	1	3	3	3	-0.02	1	2	3	LIAYYSEVPVK LIAYYSEVPVK LIAYYSEVPVK	LIAYYSEVPVK LIAYYSEVPVK	2	1	4	4	2
MXRA5	Matrix-remodeling-associated protein 5	MXRA5_HUMAN	50Step_Domain_p600.0_to_650.0	600	650	50.0 AA STEP	50	3	0	2	3	3	-0.02	1	2	3	VQVSDSGYYR VQVSDSGYYR	VQVSDSGYYR VQVSDSGYYR	3	0	2	3	2
MXRA5	Matrix-remodeling-associated protein 5	MXRA5_HUMAN	50Step_Domain_p2000.0_to_2050.0	2000	2050	50.0 AA STEP	50	1	3	2	2	3	0	1	2	2	VWQTVSPVEGR LHVAALPPVIHQEK VWQTVSPVEGR CVASNAAGADSLAIR VWQTVSPVEGR	CVASNAAGADSLAIR VWQTVSPVEGR VWQTVSPVEGR	1	3	3	2	2
MXRA5	Matrix-remodeling-associated protein 5	MXRA5_HUMAN	50Step_Domain_p100.0_to_150.0	100	150	50.0 AA STEP	50	1	3	2	2	0	0.02	1	2	1	VITGQTLQGLSNLMR DLSSLQVFK VITGQTLQGLSNLMR DLSSLQVFK VITGQTLQGLSNLMR	DLSSLQVFK VITGQTLQGLSNLMR	1	3	3	2	0
MXRA5	Matrix-remodeling-associated protein 5	MXRA5_HUMAN	50Step_Domain_p2350.0_to_2400.0	2350	2400	50.0 AA STEP	50	3	0	2	2	0	0.02	1	2	1	YQIYQDGTLLIQK YQIYQDGTLLIQK	VTWLSPTNK YQIYQDGTLLIQK	3	0	3	2	0
MXRA5	Matrix-remodeling-associated protein 5	MXRA5_HUMAN	50Step_Domain_p2700.0_to_2750.0	2700	2750	50.0 AA STEP	50	0	0	3	2	0	0	1	1	1	METEYGPSVTSIPVIVIAYPPR	METEYGPSVTSIPVIVIAYPPR	0	0	4	2	0
MXRA5	Matrix-remodeling-associated protein 5	MXRA5_HUMAN	50Step_Domain_p2400.0_to_2450.0	2400	2450	50.0 AA STEP	50	3	0	2	1	0	0.04	1	2	0	YQIYQDGTLLIQK YQIYQDGTLLIQK	YQIYQDGTLLIQK	3	0	3	1	0
MXRA5	Matrix-remodeling-associated protein 5	MXRA5_HUMAN	50Step_Domain_p450.0_to_500.0	450	500	50.0 AA STEP	50	0	3	1	0	1	0.02	1	1	0	SWVMIEPSGAVQR SWVMIEPSGAVQR	SWVMIEPSGAVQR	0	3	1	0	1
MXRA5	Matrix-remodeling-associated protein 5	MXRA5_HUMAN	50Step_Domain_p550.0_to_600.0	550	600	50.0 AA STEP	50	2	0	2	1	0	0.02	1	1	0	VLVQSPSTQPAEK VLVQSPSTQPAEK	VLVQSPSTQPAEK	2	0	2	1	0
N/A	Biglycan	A8K7E0_HUMAN	50Step_Domain_p200.0_to_250.0	200	250	50.0 AA STEP	50	66	53	67	99	88	-0.64	0.0344	62	94	DLPETLNELHLDHNK IQAIELEDLLR NMNCIEMGGNPLENSGFEPGAFDGLK DLPETLNELHLDHNK IQAIELEDLLR NMNCIEMGGNPLENSGFEPGAFDGLK DLPETLNELHLDHNK IQAIELEDLLR NMNCIEMGGNPLENSGFEPGAFDGLK	DLPETLNELHLDHNK IQAIELEDLLR ISEAKLTGIPK NMNCIEMGGNPLENSGFEPGAFDGLK DLPETLNELHLDHNK IQAIELEDLLR NMNCIEMGGNPLENSGFEPGAFDGLK	29	30	91	154	119
N/A	Biglycan	Q53FI4_HUMAN	50Step_Domain_p200.0_to_250.0	200	250	50.0 AA STEP	50	66	53	67	99	88	-0.64	0.0344	62	94	DLPETLNELHLDHNK IQAIELEDLLR NMNCIEMGGNPLENSGFEPGAFDGLK DLPETLNELHLDHNK IQAIELEDLLR NMNCIEMGGNPLENSGFEPGAFDGLK DLPETLNELHLDHNK IQAIELEDLLR NMNCIEMGGNPLENSGFEPGAFDGLK	DLPETLNELHLDHNK IQAIELEDLLR ISEAKLTGIPK NMNCIEMGGNPLENSGFEPGAFDGLK DLPETLNELHLDHNK IQAIELEDLLR NMNCIEMGGNPLENSGFEPGAFDGLK	29	30	91	154	119
N/A	Biglycan	B4DDQ2_HUMAN	50Step_Domain_p200.0_to_250.0	200	250	50.0 AA STEP	50	63	32	58	79	90	-0.66	0.0469	51	84	DLPETLNELHLDHNK IQAIELEDLLR LGLGHNQIR DLPETLNELHLDHNK IQAIELEDLLR DLPETLNELHLDHNK IQAIELEDLLR LGLGHNQIR	DLPETLNELHLDHNK ELHLDNNK IQAIELEDLLR LGLGHNQIR DLPETLNELHLDHNK ELHLDNNK IQAIELEDLLR LGLGHNQIR	28	18	79	123	122
N/A	Mimecan	B4DI63_HUMAN	50Step_Domain_p200.0_to_250.0	200	250	50.0 AA STEP	50	69	87	64	79	79	-0.12	1	73	79	DFADIPNLR LDFTGNLIEDIEDGTFSK LSLLEELSLAENQLLK RLDFTGNLIEDIEDGTFSK DFADIPNLR LDFTGNLIEDIEDGTFSK LSLLEELSLAENQLLK RLDFTGNLIEDIEDGTFSK DFADIPNLR LDFTGNLIEDIEDGTFSK LSLLEELSLAENQLLK RLDFTGNLIEDIEDGTFSK	DFADIPNLR LDFTGNLIEDIEDGTFSK LSLLEELSLAENQLLK RLDFTGNLIEDIEDGTFSK DFADIPNLR LDFTGNLIEDIEDGTFSK RLDFTGNLIEDIEDGTFSK	103	46	33	60	56
N/A	Biglycan	A6NLG9_HUMAN	50Step_Domain_p150.0_to_200.0	150	200	50.0 AA STEP	50	63	32	58	76	70	-0.44	0.7224	51	73	DLPETLNELHLDHNK IQAIELEDLLR LGLGHNQIR DLPETLNELHLDHNK IQAIELEDLLR DLPETLNELHLDHNK IQAIELEDLLR LGLGHNQIR	DLPETLNELHLDHNK IQAIELEDLLR ISEAKLTGIPK LGLGHNQIR DLPETLNELHLDHNK IQAIELEDLLR LGLGHNQIR	28	18	79	118	95
N/A	Biglycan	B4DDQ2_HUMAN	50Step_Domain_p150.0_to_200.0	150	200	50.0 AA STEP	50	54	44	59	67	67	-0.3	1	52	67	DLPETLNELHLDHNK NMNCIEMGGNPLENSGFEPGAFDGLK DLPETLNELHLDHNK NMNCIEMGGNPLENSGFEPGAFDGLK DLPETLNELHLDHNK NMNCIEMGGNPLENSGFEPGAFDGLK	DLPETLNELHLDHNK ISEAKLTGIPK NMNCIEMGGNPLENSGFEPGAFDGLK DLPETLNELHLDHNK NMNCIEMGGNPLENSGFEPGAFDGLK	24	25	81	105	90
N/A	Biglycan	A8K7E0_HUMAN	50Step_Domain_p250.0_to_300.0	250	300	50.0 AA STEP	50	36	30	23	53	65	-0.58	0.0584	30	59	IQAIELEDLLR LGLGHNQIR VPSGLPDLK IQAIELEDLLR VPSGLPDLK IQAIELEDLLR LGLGHNQIR VPSGLPDLK	ELHLDNNK IQAIELEDLLR LGLGHNQIR VPSGLPDLK ELHLDNNK IQAIELEDLLR LGLGHNQIR VPSGLPDLK	16	17	31	82	88
N/A	Biglycan	Q53FI4_HUMAN	50Step_Domain_p250.0_to_300.0	250	300	50.0 AA STEP	50	36	30	23	53	65	-0.58	0.0584	30	59	IQAIELEDLLR LGLGHNQIR VPSGLPDLK IQAIELEDLLR VPSGLPDLK IQAIELEDLLR LGLGHNQIR VPSGLPDLK	ELHLDNNK IQAIELEDLLR LGLGHNQIR VPSGLPDLK ELHLDNNK IQAIELEDLLR LGLGHNQIR VPSGLPDLK	16	17	31	82	88
N/A	Chondroitin sulfate proteoglycan 2 (Versican) variant	Q59FG9_HUMAN	50Step_Domain_p100.0_to_150.0	100	150	50.0 AA STEP	50	64	48	64	59	48	0.1	1	59	54	CDVMYGIEDTQDTVSLTVDGVVFHYR LLASDAGLYR VSVPTHPEAVGDASLTVVK LLASDAGLYR VSVPTHPEAVGDASLTVVK CDVMYGIEDTQDTVSLTVDGVVFHYR LLASDAGLYR VSVPTHPEAVGDASLTVVK	LLASDAGLYR VSVPTHPEAVGDASLTVVK LLASDAGLYR VSVPTHPEAVGDASLTVVK	19	13	42	102	73
N/A	Biglycan	B4DDQ2_HUMAN	50Step_Domain_p250.0_to_300.0	250	300	50.0 AA STEP	50	43	39	21	27	44	-0.04	1	34	36	VGVNDFCPMGFGVK VPSGLPDLK VGVNDFCPMGFGVK VPSGLPDLK VGVNDFCPMGFGVK VPSGLPDLK	AYYNGISLFNNPVPYWEVQPATFR ELHLDNNK VGVNDFCPMGFGVK VPSGLPDLK ELHLDNNK VGVNDFCPMGFGVK VPSGLPDLK	19	22	29	42	59
N/A	Biglycan	A6NLG9_HUMAN	50Step_Domain_p0_to_50	0	50	50.0 AA STEP	50	38	25	16	33	36	-0.16	1	26	34	EISPDTTLLDLQNNDISELR EISPDTTLLDLQNNDISELRK VVQCSDLGLK EISPDTTLLDLQNNDISELR EISPDTTLLDLQNNDISELRK EISPDTTLLDLQNNDISELR EISPDTTLLDLQNNDISELRK VVQCSDLGLK	EISPDTTLLDLQNNDISELR EISPDTTLLDLQNNDISELRK VVQCSDLGLK EISPDTTLLDLQNNDISELR EISPDTTLLDLQNNDISELRK VVQCSDLGLK	17	14	22	52	48
N/A	Biglycan	A8K7E0_HUMAN	50Step_Domain_p50.0_to_100.0	50	100	50.0 AA STEP	50	38	25	16	33	36	-0.16	1	26	34	EISPDTTLLDLQNNDISELR EISPDTTLLDLQNNDISELRK VVQCSDLGLK EISPDTTLLDLQNNDISELR EISPDTTLLDLQNNDISELRK EISPDTTLLDLQNNDISELR EISPDTTLLDLQNNDISELRK VVQCSDLGLK	EISPDTTLLDLQNNDISELR EISPDTTLLDLQNNDISELRK VVQCSDLGLK EISPDTTLLDLQNNDISELR EISPDTTLLDLQNNDISELRK VVQCSDLGLK	17	14	22	52	48
N/A	Biglycan	Q53FI4_HUMAN	50Step_Domain_p50.0_to_100.0	50	100	50.0 AA STEP	50	38	25	16	33	36	-0.16	1	26	34	EISPDTTLLDLQNNDISELR EISPDTTLLDLQNNDISELRK VVQCSDLGLK EISPDTTLLDLQNNDISELR EISPDTTLLDLQNNDISELRK EISPDTTLLDLQNNDISELR EISPDTTLLDLQNNDISELRK VVQCSDLGLK	EISPDTTLLDLQNNDISELR EISPDTTLLDLQNNDISELRK VVQCSDLGLK EISPDTTLLDLQNNDISELR EISPDTTLLDLQNNDISELRK VVQCSDLGLK	17	14	22	52	48
N/A	Biglycan	A8K7E0_HUMAN	50Step_Domain_p100.0_to_150.0	100	150	50.0 AA STEP	50	56	83	80	35	33	0.78	0.0056	73	34	EISPDTTLLDLQNNDISELR EISPDTTLLDLQNNDISELRK GLQHLYALVLVNNK NHLVEIPPNLPSSLVELR EISPDTTLLDLQNNDISELR EISPDTTLLDLQNNDISELRK GLQHLYALVLVNNK NHLVEIPPNLPSSLVELR EISPDTTLLDLQNNDISELR EISPDTTLLDLQNNDISELRK GLQHLYALVLVNNK NHLVEIPPNLPSSLVELR	EISPDTTLLDLQNNDISELR EISPDTTLLDLQNNDISELRK NHLVEIPPNLPSSLVELR EISPDTTLLDLQNNDISELR EISPDTTLLDLQNNDISELRK	25	47	109	55	45
N/A	Biglycan	Q53FI4_HUMAN	50Step_Domain_p100.0_to_150.0	100	150	50.0 AA STEP	50	56	83	80	35	33	0.78	0.0056	73	34	EISPDTTLLDLQNNDISELR EISPDTTLLDLQNNDISELRK GLQHLYALVLVNNK NHLVEIPPNLPSSLVELR EISPDTTLLDLQNNDISELR EISPDTTLLDLQNNDISELRK GLQHLYALVLVNNK NHLVEIPPNLPSSLVELR EISPDTTLLDLQNNDISELR EISPDTTLLDLQNNDISELRK GLQHLYALVLVNNK NHLVEIPPNLPSSLVELR	EISPDTTLLDLQNNDISELR EISPDTTLLDLQNNDISELRK NHLVEIPPNLPSSLVELR EISPDTTLLDLQNNDISELR EISPDTTLLDLQNNDISELRK	25	47	109	55	45
N/A	Chondroitin sulfate proteoglycan 2 (Versican) variant	Q59FG9_HUMAN	50Step_Domain_p300.0_to_350.0	300	350	50.0 AA STEP	50	60	56	35	31	36	0.32	0	50	34	LATVGELQAAWR NGFDQCDYGWLSDASVR LATVGELQAAWR NGFDQCDYGWLSDASVR LATVGELQAAWR NGFDQCDYGWLSDASVR	AQCGGGLLGVR FENQTGFPPPDSR LATVGELQAAWR NGFDQCDYGWLSDASVR AQCGGGLLGVR FENQTGFPPPDSR LATVGELQAAWR NGFDQCDYGWLSDASVR	18	15	23	54	54
N/A	Chondroitin sulfate proteoglycan 2 (Versican) variant	Q59FG9_HUMAN	50Step_Domain_p1350.0_to_1400.0	1350	1400	50.0 AA STEP	50	0	4	12	29	37	-0.56	0	5	33	MSDLSVIGHPIDSESK MSDLSVIGHPIDSESK	MSDLSVIGHPIDSESK MSDLSVIGHPIDSESK	0	1	8	51	56
N/A	Biglycan	A6NLG9_HUMAN	50Step_Domain_p200.0_to_250.0	200	250	50.0 AA STEP	50	25	21	15	21	44	-0.24	1	20	32	LGLGHNQIR VPSGLPDLK VPSGLPDLK LGLGHNQIR VPSGLPDLK	ELHLDNNK LGLGHNQIR VPSGLPDLK ELHLDNNK LGLGHNQIR VPSGLPDLK	11	12	21	33	59
N/A	Biglycan	B4DDQ2_HUMAN	50Step_Domain_p50.0_to_100.0	50	100	50.0 AA STEP	50	38	26	15	31	33	-0.12	1	26	32	EISPDTTLLDLQNNDISELR EISPDTTLLDLQNNDISELRK GLQHLYALVLVNNK EISPDTTLLDLQNNDISELR EISPDTTLLDLQNNDISELRK GLQHLYALVLVNNK EISPDTTLLDLQNNDISELR EISPDTTLLDLQNNDISELRK GLQHLYALVLVNNK	EISPDTTLLDLQNNDISELR EISPDTTLLDLQNNDISELRK EISPDTTLLDLQNNDISELR EISPDTTLLDLQNNDISELRK	17	15	21	48	45
N/A	Biglycan	A6NLG9_HUMAN	50Step_Domain_p100.0_to_150.0	100	150	50.0 AA STEP	50	27	77	76	35	24	0.6	0.1953	60	30	NHLVEIPPNLPSSLVELR NMNCIEMGGNPLENSGFEPGAFDGLK NHLVEIPPNLPSSLVELR NMNCIEMGGNPLENSGFEPGAFDGLK NHLVEIPPNLPSSLVELR NMNCIEMGGNPLENSGFEPGAFDGLK	NHLVEIPPNLPSSLVELR NMNCIEMGGNPLENSGFEPGAFDGLK NMNCIEMGGNPLENSGFEPGAFDGLK	12	44	104	54	32
N/A	Biglycan	A8K7E0_HUMAN	50Step_Domain_p150.0_to_200.0	150	200	50.0 AA STEP	50	27	77	76	35	24	0.6	0.044	60	30	NHLVEIPPNLPSSLVELR NMNCIEMGGNPLENSGFEPGAFDGLK NHLVEIPPNLPSSLVELR NMNCIEMGGNPLENSGFEPGAFDGLK NHLVEIPPNLPSSLVELR NMNCIEMGGNPLENSGFEPGAFDGLK	NHLVEIPPNLPSSLVELR NMNCIEMGGNPLENSGFEPGAFDGLK NMNCIEMGGNPLENSGFEPGAFDGLK	12	44	104	54	32
N/A	Biglycan	B4DDQ2_HUMAN	50Step_Domain_p100.0_to_150.0	100	150	50.0 AA STEP	50	27	77	76	35	24	0.6	0.0854	60	30	NHLVEIPPNLPSSLVELR NMNCIEMGGNPLENSGFEPGAFDGLK NHLVEIPPNLPSSLVELR NMNCIEMGGNPLENSGFEPGAFDGLK NHLVEIPPNLPSSLVELR NMNCIEMGGNPLENSGFEPGAFDGLK	NHLVEIPPNLPSSLVELR NMNCIEMGGNPLENSGFEPGAFDGLK NMNCIEMGGNPLENSGFEPGAFDGLK	12	44	104	54	32
N/A	Biglycan	Q53FI4_HUMAN	50Step_Domain_p150.0_to_200.0	150	200	50.0 AA STEP	50	27	77	76	35	24	0.6	0.044	60	30	NHLVEIPPNLPSSLVELR NMNCIEMGGNPLENSGFEPGAFDGLK NHLVEIPPNLPSSLVELR NMNCIEMGGNPLENSGFEPGAFDGLK NHLVEIPPNLPSSLVELR NMNCIEMGGNPLENSGFEPGAFDGLK	NHLVEIPPNLPSSLVELR NMNCIEMGGNPLENSGFEPGAFDGLK NMNCIEMGGNPLENSGFEPGAFDGLK	12	44	104	54	32
N/A	Chondroitin sulfate proteoglycan 2 (Versican) variant	Q59FG9_HUMAN	50Step_Domain_p250.0_to_300.0	250	300	50.0 AA STEP	50	40	33	32	23	27	0.2	0	35	25	FTFEEAAK LATVGELQAAWR FTFEEAAK LATVGELQAAWR SPQETYDVYCYVDHLDGDVFHLTVPSK FTFEEAAK LATVGELQAAWR SPQETYDVYCYVDHLDGDVFHLTVPSK	FTFEEAAK FTFEEAAKECENQDAR LATVGELQAAWR FTFEEAAK LATVGELQAAWR	12	9	21	39	41
N/A	cDNA PSEC0172 fis; clone PLACE1011835; highly similar to Procollagen C-endopeptidase enhancer 2	B3KQT8_HUMAN	50Step_Domain_p350.0_to_400.0	350	400	50.0 AA STEP	50	18	22	22	23	26	-0.06	0.234	21	24	EGNLAIQQAGK GLNYIIMGQVGEDGR GLNYIIMGQVGEDGR EGNLAIQQAGK GLNYIIMGQVGEDGR	EGNLAIQQAGK GLNYIIMGQVGEDGR GLNYIIMGQVGEDGR	14	26	25	21	24
N/A	Procollagen C-endopeptidase enhancer 2 variant	Q53EK6_HUMAN	50Step_Domain_p350.0_to_400.0	350	400	50.0 AA STEP	50	18	22	22	23	26	-0.06	0.234	21	24	EGNLAIQQAGK GLNYIIMGQVGEDGR GLNYIIMGQVGEDGR EGNLAIQQAGK GLNYIIMGQVGEDGR	EGNLAIQQAGK GLNYIIMGQVGEDGR GLNYIIMGQVGEDGR	14	26	25	21	24
N/A	cDNA FLJ76826; highly similar to Homo sapiens ceruloplasmin (ferroxidase) (CP); mRNA	A8K5A4_HUMAN	50Step_Domain_p550.0_to_600.0	550	600	50.0 AA STEP	50	17	18	15	18	31	-0.14	0.0484	17	24	DIFTGLIGPMK DVDKEFYLFPTVFDENESLLLEDNIR MFTTAPDQVDK MFTTAPDQVDKEDEDFQESNK DIFTGLIGPMK DVDKEFYLFPTVFDENESLLLEDNIR EFYLFPTVFDENESLLLEDNIR MFTTAPDQVDKEDEDFQESNK DIFTGLIGPMK MFTTAPDQVDKEDEDFQESNK	DIFTGLIGPMK MFTTAPDQVDKEDEDFQESNK DIFTGLIGPMK MFTTAPDQVDKEDEDFQESNK	28	25	5	14	25
N/A	Mimecan	B4DI63_HUMAN	50Step_Domain_p300.0_to_350.0	300	350	50.0 AA STEP	50	7	19	17	20	23	-0.16	1	14	22	LEGNPIVLGK LEGNPIVLGK RLPIGSYF LEGNPIVLGK	LEGNPIVLGK LEGNPIVLGK	10	10	9	15	16
N/A	C3/C5 convertase	B4E1Z4_HUMAN	50Step_Domain_p800.0_to_850.0	800	850	50.0 AA STEP	50	16	8	11	21	19	-0.16	0	12	20	CLVNLIEK QLNEINYEDHK VSEADSSNADWVTK YGLVTYATYPK CLVNLIEK VSEADSSNADWVTK YGLVTYATYPK VSEADSSNADWVTK YGLVTYATYPK	QLNEINYEDHK VSEADSSNADWVTK YGLVTYATYPK QLNEINYEDHK VSEADSSNADWVTK YGLVTYATYPK	27	13	5	7	7
N/A	Mimecan	B4DI63_HUMAN	50Step_Domain_p150.0_to_200.0	150	200	50.0 AA STEP	50	7	13	17	20	11	-0.08	1	12	16	DFADIPNLR ESAYLYAR DFADIPNLR ESAYLYAR DFADIPNLR ESAYLYAR	DFADIPNLR ESAYLYAR DFADIPNLR ESAYLYAR	10	7	9	15	8
N/A	cDNA FLJ76826; highly similar to Homo sapiens ceruloplasmin (ferroxidase) (CP); mRNA	A8K5A4_HUMAN	50Step_Domain_p600.0_to_650.0	600	650	50.0 AA STEP	50	14	7	12	10	21	-0.1	1	11	16	MFTTAPDQVDK MFTTAPDQVDKEDEDFQESNK MFTTAPDQVDKEDEDFQESNK MFTTAPDQVDKEDEDFQESNK	MFTTAPDQVDKEDEDFQESNK MFTTAPDQVDKEDEDFQESNK	23	9	4	8	17
N/A	cDNA FLJ76826; highly similar to Homo sapiens ceruloplasmin (ferroxidase) (CP); mRNA	A8K5A4_HUMAN	50Step_Domain_p250.0_to_300.0	250	300	50.0 AA STEP	50	4	1	0	20	11	-0.28	0	2	16	MYSVNGYTFGSLPGLSMCAEDR MYSVNGYTFGSLPGLSMCAEDR WYLFGMGNEVDVHAAFFHGQALTNK	MYSVNGYTFGSLPGLSMCAEDR VDKDNEDFQESNR MYSVNGYTFGSLPGLSMCAEDR VDKDNEDFQESNR	6	2	0	15	9
N/A	cDNA FLJ76826; highly similar to Homo sapiens ceruloplasmin (ferroxidase) (CP); mRNA	A8K5A4_HUMAN	50Step_Domain_p500.0_to_550.0	500	550	50.0 AA STEP	50	18	15	17	12	15	0.06	1	17	14	DIFTGLIGPMK EVGPTNADPVCLAK MYYSAVDPTK SVPPSASHVAPTETFTYEWTVPK DIFTGLIGPMK MYYSAVDPTK SVPPSASHVAPTETFTYEWTVPK DIFTGLIGPMK MYYSAVDPTK	DIFTGLIGPMK MYYSAVDPTK DIFTGLIGPMK MYYSAVDPTK	30	21	6	9	12
N/A	Chondroitin sulfate proteoglycan 2 (Versican) variant	Q59FG9_HUMAN	50Step_Domain_p150.0_to_200.0	150	200	50.0 AA STEP	50	30	11	21	13	13	0.16	0.0276	21	13	CDVMYGIEDTQDTVSLTVDGVVFHYR YTLNFEAAQK YTLNFEAAQK CDVMYGIEDTQDTVSLTVDGVVFHYR YTLNFEAAQK	YTLNFEAAQK YTLNFEAAQK	9	3	14	22	20
N/A	Activin beta-A chain	Q53H39_HUMAN	50Step_Domain_p150.0_to_200.0	150	200	50.0 AA STEP	50	11	13	13	15	11	-0.02	1	12	13	AEVWLFLK EGSDLSVVER AEVWLFLK EGSDLSVVER HPQGSLDTGEEAEEVGLK HPQGSLDTGEEAEEVGLKGER AEVWLFLK EGSDLSVVER HPQGSLDTGEEAEEVGLK	EGSDLSVVER EGSDLSVVER	10	9	20	7	5
N/A	Activin beta-A chain	Q53H39_HUMAN	50Step_Domain_p100.0_to_150.0	100	150	50.0 AA STEP	50	8	7	9	15	11	-0.1	0	8	13	EGSDLSVVER AEMNELMEQTSEIITFAESGTAR EGSDLSVVER AEMNELMEQTSEIITFAESGTAR EGSDLSVVER	EGSDLSVVER EGSDLSVVER	8	5	14	7	5
N/A	C3/C5 convertase	B4E1Z4_HUMAN	50Step_Domain_p1100.0_to_1150.0	1100	1150	50.0 AA STEP	50	6	1	11	12	13	-0.12	0.0026	6	12	ALFVSEEEK ALFVSEEEKK EELLPAQDIK ALFVSEEEK EELLPAQDIK EELLPAQDIK	ALFVSEEEK ALFVSEEEKK EELLPAQDIK EELLPAQDIK	10	2	5	4	5
N/A	Chondroitin sulfate proteoglycan 2 (Versican) variant	Q59FG9_HUMAN	50Step_Domain_p2100.0_to_2150.0	2100	2150	50.0 AA STEP	50	3	7	6	15	9	-0.14	0.1449	5	12	QEIESETTSEEQIQEEK QEVNPVRQEIESETTSEEQIQEEK QEIESETTSEEQIQEEK QEVNPVRQEIESETTSEEQIQEEK	QEIESETTSEEQIQEEK QEVNPVRQEIESETTSEEQIQEEK QEIESETTSEEQIQEEK	1	2	4	26	14
N/A	Biglycan	A6NLG9_HUMAN	50Step_Domain_p250.0_to_300.0	250	300	50.0 AA STEP	50	25	18	10	16	7	0.12	1	18	12	VGVNDFCPMGFGVK VGVNDFCPMGFGVK LAIQFGNYK VGVNDFCPMGFGVK	AYYNGISLFNNPVPYWEVQPATFR LAIQFGNYK VGVNDFCPMGFGVK LAIQFGNYK VGVNDFCPMGFGVK	11	10	14	25	9
N/A	cDNA FLJ76037; highly similar to Homo sapiens matrilin 3 (MATN3); mRNA	A8K491_HUMAN	50Step_Domain_p100.0_to_150.0	100	150	50.0 AA STEP	50	9	11	14	11	10	0.02	1	11	10	IIDTLDIGPADTR VAVVNYASTVK IIDTLDIGPADTR VAVVNYASTVK IIDTLDIGPADTR VAVVNYASTVK	IEFQLQAYTDK IIDTLDIGPADTR VAVVNYASTVK IEFQLQAYTDK IIDTLDIGPADTR VAVVNYASTVK	2	4	3	9	18
N/A	Uncharacterized protein	Q8WVW5_HUMAN	50Step_Domain_p300.0_to_350.0	300	350	50.0 AA STEP	50	14	6	17	9	11	0.04	1	12	10	EITALAPSTMK QEYDESGPSIVHR EITALAPSTMK QEYDESGPSIVHR EITALAPSTMK QEYDESGPSIVHR	EITALAPSTMK QEYDESGPSIVHR EITALAPSTMK QEYDESGPSIVHR	10	8	10	8	10
N/A	cDNA FLJ76826; highly similar to Homo sapiens ceruloplasmin (ferroxidase) (CP); mRNA	A8K5A4_HUMAN	50Step_Domain_p700.0_to_750.0	700	750	50.0 AA STEP	50	4	4	12	8	12	-0.06	1	7	10	QSEDSTFYLGER QSEDSTFYLGER RQSEDSTFYLGER QSEDSTFYLGER	QSEDSTFYLGER QSEDSTFYLGER	6	5	4	6	10
N/A	Biglycan	A8K7E0_HUMAN	50Step_Domain_p300.0_to_350.0	300	350	50.0 AA STEP	50	25	18	9	13	6	0.14	1	17	10	VGVNDFCPMGFGVK VGVNDFCPMGFGVK VGVNDFCPMGFGVK	AYYNGISLFNNPVPYWEVQPATFR VGVNDFCPMGFGVK VGVNDFCPMGFGVK	11	10	12	20	8
N/A	Biglycan	Q53FI4_HUMAN	50Step_Domain_p300.0_to_350.0	300	350	50.0 AA STEP	50	25	18	9	13	6	0.14	1	17	10	VGVNDFCPMGFGVK VGVNDFCPMGFGVK VGVNDFCPMGFGVK	AYYNGISLFNNPVPYWEVQPATFR VGVNDFCPMGFGVK VGVNDFCPMGFGVK	11	10	12	20	8
N/A	Uncharacterized protein	Q8WVW5_HUMAN	50Step_Domain_p150.0_to_200.0	150	200	50.0 AA STEP	50	16	25	16	9	9	0.2	0.072	19	9	DLTDYLMK GYSFTTTAER TTGIVMDSGDGVTHTVPIYEGYALPHAILR DLTDYLMK GYSFTTTAER TTGIVMDSGDGVTHTVPIYEGYALPHAILR DLTDYLMK GYSFTTTAER TTGIVMDSGDGVTHTVPIYEGYALPHAILR	DLTDYLMK GYSFTTTAER DLTDYLMK GYSFTTTAER	11	36	9	8	8
N/A	Angiotensin 1-10	B4E1B3_HUMAN	50Step_Domain_p50.0_to_100.0	50	100	50.0 AA STEP	50	6	4	4	8	10	-0.08	0.001	5	9	ALQDQLVLVAAK DPTFIPAPIQAK ALQDQLVLVAAK DPTFIPAPIQAK ALQDQLVLVAAK DPTFIPAPIQAK	ALQDQLVLVAAK DPTFIPAPIQAK ALQDQLVLVAAK DPTFIPAPIQAK	6	6	3	5	5
N/A	Angiotensin 1-10	Q53GY3_HUMAN	50Step_Domain_p50.0_to_100.0	50	100	50.0 AA STEP	50	6	4	4	8	10	-0.08	0.004	5	9	ALQDQLVLVAAK DPTFIPAPIQAK ALQDQLVLVAAK DPTFIPAPIQAK ALQDQLVLVAAK DPTFIPAPIQAK	ALQDQLVLVAAK DPTFIPAPIQAK ALQDQLVLVAAK DPTFIPAPIQAK	6	6	3	5	5
N/A	Angiotensin 1-10	Q59EP2_HUMAN	50Step_Domain_p50.0_to_100.0	50	100	50.0 AA STEP	50	6	4	4	8	10	-0.08	0.001	5	9	ALQDQLVLVAAK DPTFIPAPIQAK ALQDQLVLVAAK DPTFIPAPIQAK ALQDQLVLVAAK DPTFIPAPIQAK	ALQDQLVLVAAK DPTFIPAPIQAK ALQDQLVLVAAK DPTFIPAPIQAK	6	6	3	5	5
N/A	Angiotensin 1-10	Q86U78_HUMAN	50Step_Domain_p50.0_to_100.0	50	100	50.0 AA STEP	50	6	4	4	8	10	-0.08	0.004	5	9	ALQDQLVLVAAK DPTFIPAPIQAK ALQDQLVLVAAK DPTFIPAPIQAK ALQDQLVLVAAK DPTFIPAPIQAK	ALQDQLVLVAAK DPTFIPAPIQAK ALQDQLVLVAAK DPTFIPAPIQAK	6	6	3	5	5
N/A	Uncharacterized protein	Q8WVW5_HUMAN	50Step_Domain_p100.0_to_150.0	100	150	50.0 AA STEP	50	4	20	5	6	11	0.04	1	10	8	TTGIVMDSGDGVTHTVPIYEGYALPHAILR VAPEEHPVLLTEAPLNPK TTGIVMDSGDGVTHTVPIYEGYALPHAILR VAPEEHPVLLTEAPLNPK TTGIVMDSGDGVTHTVPIYEGYALPHAILR VAPEEHPVLLTEAPLNPK	VAPEEHPVLLTEAPLNPK VAPEEHPVLLTEAPLNPK	3	29	3	6	10
N/A	Uncharacterized protein	Q8WVW5_HUMAN	50Step_Domain_p50.0_to_100.0	50	100	50.0 AA STEP	50	3	5	3	6	11	-0.08	1	4	8	IWHHTFYNELR VAPEEHPVLLTEAPLNPK IWHHTFYNELR VAPEEHPVLLTEAPLNPK VAPEEHPVLLTEAPLNPK	VAPEEHPVLLTEAPLNPK VAPEEHPVLLTEAPLNPK	2	7	2	6	10
N/A	Angiotensin 1-10	Q59EP2_HUMAN	50Step_Domain_p200.0_to_250.0	200	250	50.0 AA STEP	50	8	11	13	10	6	0.06	0.071	11	8	QPFVQGLALYTPVVLPR SLDFTELDVAAEK VLSALQAVQGLLVAQGR ADSQAQLLLSTVVGVFTAPGLHLK QPFVQGLALYTPVVLPR SLDFTELDVAAEK VLSALQAVQGLLVAQGR QPFVQGLALYTPVVLPR SLDFTELDVAAEK VLSALQAVQGLLVAQGR	QPFVQGLALYTPVVLPR SLDFTELDVAAEK VLSALQAVQGLLVAQGR SLDFTELDVAAEK VLSALQAVQGLLVAQGR	8	16	10	6	3
N/A	Cadherin-1	Q9UII7_HUMAN	50Step_Domain_p50.0_to_100.0	50	100	50.0 AA STEP	50	7	8	8	8	8	0	1	8	8	TAYFSLDTR VGTDGVITVK TAYFSLDTR VGTDGVITVK TAYFSLDTR VGTDGVITVK	TAYFSLDTR VGTDGVITVK TAYFSLDTR VGTDGVITVK	6	10	10	8	7
N/A	Semaphorin-3C	B4E2I9_HUMAN	50Step_Domain_p50.0_to_100.0	50	100	50.0 AA STEP	50	3	5	6	6	10	-0.06	0	5	8	ILLMDEDQDR VYLTFDELR ILLMDEDQDR TSEYFSLSHHPLDYR VYLTFDELR ILLMDEDQDR VYLTFDELR	ILLMDEDQDR ILLMDEDQDR VYLTFDELR	3	5	7	6	10
N/A	Ferritin	B3KXC3_HUMAN	50Step_Domain_p150.0_to_183.0	150	183	50.0 AA STEP	33	7	8	7	8	7	-0.030303	1	7	8	ELGDHVTNLR MGAPESGLAEYLFDK ELGDHVTNLR MGAPESGLAEYLFDK ELGDHVTNLR MGAPESGLAEYLFDK	ELGDHVTNLR MGAPESGLAEYLFDK ELGDHVTNLR MGAPESGLAEYLFDK	5	6	10	4	6
N/A	Uncharacterized protein	Q8WVW5_HUMAN	50Step_Domain_p200.0_to_250.0	200	250	50.0 AA STEP	50	7	3	5	8	6	-0.04	1	5	7	LCYVALDFEQEMATAASSSSLEK SYELPDGQVITIGNER SYELPDGQVITIGNER SYELPDGQVITIGNER	SYELPDGQVITIGNER SYELPDGQVITIGNER	5	4	3	7	5
N/A	cDNA FLJ76826; highly similar to Homo sapiens ceruloplasmin (ferroxidase) (CP); mRNA	A8K5A4_HUMAN	50Step_Domain_p50.0_to_100.0	50	100	50.0 AA STEP	50	7	4	9	7	6	0.02	1	7	6	ALYLQYTDETFR LISVDTEHSNIYLQNGPDR TTIEKPVWLGFLGPIIK ALYLQYTDETFR LISVDTEHSNIYLQNGPDR TTIEKPVWLGFLGPIIK ALYLQYTDETFR	ALYLQYTDETFR LISVDTEHSNIYLQNGPDR ALYLQYTDETFR LISVDTEHSNIYLQNGPDR	12	6	3	5	5
N/A	Uncharacterized protein	Q8WVW5_HUMAN	50Step_Domain_p250.0_to_300.0	250	300	50.0 AA STEP	50	7	8	5	9	4	0.02	1	7	6	DLYANTVLSGGTTMYPGIADR DLYANTVLSGGTTMYPGIADR DLYANTVLSGGTTMYPGIADR	DLYANTVLSGGTTMYPGIADR DLYANTVLSGGTTMYPGIADR	5	11	3	8	4
N/A	cDNA PSEC0172 fis; clone PLACE1011835; highly similar to Procollagen C-endopeptidase enhancer 2	B3KQT8_HUMAN	50Step_Domain_p50.0_to_100.0	50	100	50.0 AA STEP	50	15	6	12	7	5	0.1	0.0432	11	6	FIDLESDNLCR FIDLESDNLCR FIDLESDNLCR	FIDLESDNLCR FIDLESDNLCR	12	7	13	6	5
N/A	Procollagen C-endopeptidase enhancer 2 variant	Q53EK6_HUMAN	50Step_Domain_p50.0_to_100.0	50	100	50.0 AA STEP	50	15	6	12	7	5	0.1	0.0432	11	6	FIDLESDNLCR FIDLESDNLCR FIDLESDNLCR	FIDLESDNLCR FIDLESDNLCR	12	7	13	6	5
N/A	Angiotensin 1-10	B4E1B3_HUMAN	50Step_Domain_p200.0_to_250.0	200	250	50.0 AA STEP	50	8	11	11	8	4	0.08	0.004	10	6	FMQAVTGWK QPFVQGLALYTPVVLPR SLDFTELDVAAEK ADSQAQLLLSTVVGVFTAPGLHLK FMQAVTGWK QPFVQGLALYTPVVLPR SLDFTELDVAAEK QPFVQGLALYTPVVLPR SLDFTELDVAAEK	QPFVQGLALYTPVVLPR SLDFTELDVAAEK FMQAVTGWK SLDFTELDVAAEK	8	16	8	5	2
N/A	Uncharacterized protein	Q8WVW5_HUMAN	50Step_Domain_p350.0_to_363.0	350	363	50.0 AA STEP	13	7	4	10	5	7	0.0769231	1	7	6	QEYDESGPSIVHR QEYDESGPSIVHR QEYDESGPSIVHR	QEYDESGPSIVHR QEYDESGPSIVHR	5	5	6	5	6
N/A	Ferritin	B3KXC3_HUMAN	50Step_Domain_p100.0_to_150.0	100	150	50.0 AA STEP	50	5	4	5	6	6	-0.02	0.0112	5	6	ELGDHVTNLR NVNQSLLELHK ELGDHVTNLR NVNQSLLELHK ELGDHVTNLR NVNQSLLELHK	ELGDHVTNLR NVNQSLLELHK ELGDHVTNLR NVNQSLLELHK	4	3	7	3	5
N/A	cDNA PSEC0172 fis; clone PLACE1011835; highly similar to Procollagen C-endopeptidase enhancer 2	B3KQT8_HUMAN	50Step_Domain_p200.0_to_250.0	200	250	50.0 AA STEP	50	3	1	2	7	5	-0.08	0.1863	2	6	YDYVAVFNGGEVNDAR YDYVAVFNGGEVNDAR YDYVAVFNGGEVNDAR	YDYVAVFNGGEVNDAR YDYVAVFNGGEVNDAR	2	1	2	6	5
N/A	Procollagen C-endopeptidase enhancer 2 variant	Q53EK6_HUMAN	50Step_Domain_p200.0_to_250.0	200	250	50.0 AA STEP	50	3	1	2	7	5	-0.08	0.1863	2	6	YDYVAVFNGGEVNDAR YDYVAVFNGGEVNDAR YDYVAVFNGGEVNDAR	YDYVAVFNGGEVNDAR YDYVAVFNGGEVNDAR	2	1	2	6	5
N/A	Vitamin K-dependent protein S	Q9NSD0_HUMAN	50Step_Domain_p550.0_to_600.0	550	600	50.0 AA STEP	50	3	3	0	5	7	-0.08	0	2	6	IETISHEDLQR NNLELSTPLK IETISHEDLQR NNLELSTPLK	IETISHEDLQR IETISHEDLQR NNLELSTPLK	4	5	0	3	3
N/A	Chondroitin sulfate proteoglycan 2 (Versican) variant	Q59FG9_HUMAN	50Step_Domain_p3200.0_to_3250.0	3200	3250	50.0 AA STEP	50	10	26	17	5	6	0.24	0	18	6	LQGAHLTSILSHEEQMFVNR VGHDYQWIGLNDK LQGAHLTSILSHEEQMFVNR VGHDYQWIGLNDK	VGHDYQWIGLNDK VGHDYQWIGLNDK	3	7	11	8	9
N/A	C3/C5 convertase	B4E1Z4_HUMAN	50Step_Domain_p1050.0_to_1100.0	1050	1100	50.0 AA STEP	50	10	13	7	6	5	0.08	0.1794	10	6	EAGIPEFYDYDVALIK KEAGIPEFYDYDVALIK EAGIPEFYDYDVALIK KEAGIPEFYDYDVALIK EAGIPEFYDYDVALIK	EAGIPEFYDYDVALIK EAGIPEFYDYDVALIK	17	20	3	2	2
N/A	Mimecan	B4DI63_HUMAN	50Step_Domain_p100.0_to_150.0	100	150	50.0 AA STEP	50	0	0	4	4	7	-0.1	1	1	6	EKETVIIPNEK ETVIIPNEK	EKETVIIPNEK ETVIIPNEK EKETVIIPNEK ETVIIPNEK	0	0	2	3	5
N/A	Angiotensin 1-10	B4E1B3_HUMAN	50Step_Domain_p0_to_50	0	50	50.0 AA STEP	50	1	1	1	3	8	-0.1	0.001	1	6	DPTFIPAPIQAK DPTFIPAPIQAK DPTFIPAPIQAK	DPTFIPAPIQAK DPTFIPAPIQAK	1	2	1	2	4
N/A	Angiotensin 1-10	Q53GY3_HUMAN	50Step_Domain_p200.0_to_250.0	200	250	50.0 AA STEP	50	6	9	11	8	2	0.08	0.022	9	5	QPFVQGLALYTPVVLPR SLDFTELDVAAEK ADSQAQLLLSTVVGVFTAPGLHLK QPFVQGLALYTPVVLPR SLDFTELDVAAEK QPFVQGLALYTPVVLPR SLDFTELDVAAEK	QPFVQGLALYTPVVLPR SLDFTELDVAAEK SLDFTELDVAAEK	6	14	8	5	1
N/A	Angiotensin 1-10	Q86U78_HUMAN	50Step_Domain_p200.0_to_250.0	200	250	50.0 AA STEP	50	6	9	11	8	2	0.08	0.022	9	5	QPFVQGLALYTPVVLPR SLDFTELDVAAEK ADSQAQLLLSTVVGVFTAPGLHLK QPFVQGLALYTPVVLPR SLDFTELDVAAEK QPFVQGLALYTPVVLPR SLDFTELDVAAEK	QPFVQGLALYTPVVLPR SLDFTELDVAAEK SLDFTELDVAAEK	6	14	8	5	1
N/A	Angiotensin 1-10	Q59EP2_HUMAN	50Step_Domain_p250.0_to_300.0	250	300	50.0 AA STEP	50	7	7	8	6	4	0.04	0.17	7	5	FMQAVTGWK SLDFTELDVAAEK FMQAVTGWK SLDFTELDVAAEK SLDFTELDVAAEK	SLDFTELDVAAEK FMQAVTGWK SLDFTELDVAAEK	7	11	6	4	2
N/A	Chondroitin sulfate proteoglycan 2 (Versican) variant	Q59FG9_HUMAN	50Step_Domain_p1900.0_to_1950.0	1900	1950	50.0 AA STEP	50	3	7	2	5	5	-0.02	1	4	5	LGEPNYGAEIR LGEPNYGAEIR LGEPNYGAEIR	LGEPNYGAEIR LGEPNYGAEIR	1	2	1	8	8
N/A	Fibulin-1	Q8NBH6_HUMAN	50Step_Domain_p50.0_to_100.0	50	100	50.0 AA STEP	50	3	3	2	0	10	-0.04	0.936	3	5	IIEVEEEQEDPYLNDR SQETGDLDVGGLQETDK IIEVEEEQEDPYLNDR SQETGDLDVGGLQETDK SQETGDLDVGGLQETDK	IIEVEEEQEDPYLNDR SQETGDLDVGGLQETDK	4	5	1	0	2
N/A	cDNA FLJ76826; highly similar to Homo sapiens ceruloplasmin (ferroxidase) (CP); mRNA	A8K5A4_HUMAN	50Step_Domain_p450.0_to_500.0	450	500	50.0 AA STEP	50	8	11	12	5	4	0.12	0.4488	10	4	GAYPLSIEPIGVR GPEEEHLGILGPVIWAEVGDTIR NNEGTYYSPNYNPQSR ERGPEEEHLGILGPVIWAEVGDTIR GAYPLSIEPIGVR GPEEEHLGILGPVIWAEVGDTIR NNEGTYYSPNYNPQSR GAYPLSIEPIGVR NNEGTYYSPNYNPQSR	GAYPLSIEPIGVR NNEGTYYSPNYNPQSR GAYPLSIEPIGVR NNEGTYYSPNYNPQSR	13	15	4	4	3
N/A	C3/C5 convertase	B4E1Z4_HUMAN	50Step_Domain_p1150.0_to_1200.0	1150	1200	50.0 AA STEP	50	4	3	9	6	3	0.02	1	5	4	DAQYAPGYDK DISEVVTPR GDSGGPLIVHK DISEVVTPR DAQYAPGYDK DISEVVTPR	DISEVVTPR DISEVVTPR	7	4	4	2	1
N/A	cDNA FLJ55731; highly similar to Polymerase I and transcript release factor	B4DNU9_HUMAN	50Step_Domain_p50.0_to_100.0	50	100	50.0 AA STEP	50	0	0	7	4	4	-0.04	1	2	4	IIGAVDQIQLTQAQLEER QAEMEGAVQSIQGELSK	IIGAVDQIQLTQAQLEER QAEMEGAVQSIQGELSK IIGAVDQIQLTQAQLEER QAEMEGAVQSIQGELSK	0	0	2	6	8
N/A	cDNA FLJ53495; highly similar to Polymerase I and transcript release factor	B4DPZ5_HUMAN	50Step_Domain_p50.0_to_100.0	50	100	50.0 AA STEP	50	0	0	7	4	4	-0.04	1	2	4	IIGAVDQIQLTQAQLEER QAEMEGAVQSIQGELSK	IIGAVDQIQLTQAQLEER QAEMEGAVQSIQGELSK IIGAVDQIQLTQAQLEER QAEMEGAVQSIQGELSK	0	0	2	6	8
N/A	cDNA FLJ76826; highly similar to Homo sapiens ceruloplasmin (ferroxidase) (CP); mRNA	A8K5A4_HUMAN	50Step_Domain_p750.0_to_800.0	750	800	50.0 AA STEP	50	10	12	12	7	0	0.14	0.0484	11	4	AEEEHLGILGPQLHADVGDK GEFYIGSK QYTDSTFR AEEEHLGILGPQLHADVGDK KAEEEHLGILGPQLHADVGDK AEEEHLGILGPQLHADVGDK	AEEEHLGILGPQLHADVGDK GEFYIGSK	16	16	4	5	0
N/A	cDNA FLJ76826; highly similar to Homo sapiens ceruloplasmin (ferroxidase) (CP); mRNA	A8K5A4_HUMAN	50Step_Domain_p0_to_50	0	50	50.0 AA STEP	50	3	7	0	3	4	-0.02	1	3	4	HYYIGIIETTWDYASDHGEK LISVDTEHSNIYLQNGPDR HYYIGIIETTWDYASDHGEK HYYIGIIETTWDYASDHGEKK LISVDTEHSNIYLQNGPDR	LISVDTEHSNIYLQNGPDR LISVDTEHSNIYLQNGPDR	5	9	0	2	3
N/A	cDNA; FLJ93141; highly similar to Homo sapiens coagulation factor XIII; A1 polypeptide (F13A1); mRNA	B2R6V9_HUMAN	50Step_Domain_p700.0_to_732.0	700	732	50.0 AA STEP	32	5	1	3	7	0	-0.03125	1	3	4	HVYGELDVQIQR LIASMSSDSLR LIASMSSDSLR LIASMSSDSLR	LIASMSSDSLR	10	2	4	3	0
N/A	cDNA FLJ76826; highly similar to Homo sapiens ceruloplasmin (ferroxidase) (CP); mRNA	A8K5A4_HUMAN	50Step_Domain_p900.0_to_950.0	900	950	50.0 AA STEP	50	2	4	0	3	4	-0.04	1	2	4	DDEEFIESNK DDEEFIESNK VNKDDEEFIESNK	DDEEFIESNK DDEEFIESNK TYSDHPEK	3	5	0	2	3
N/A	cDNA FLJ61290; highly similar to Neutral alpha-glucosidase AB	B4DJ30_HUMAN	50Step_Domain_p150.0_to_200.0	150	200	50.0 AA STEP	50	1	1	1	3	4	-0.06	0	1	4	VPDVLVADPPIAR DENSVELTMAEGPYK DENSVELTMAEGPYK	DENSVELTMAEGPYK FRIDELEPR VPDVLVADPPIAR DENSVELTMAEGPYK VPDVLVADPPIAR	1	1	1	4	2
N/A	Calumenin	B3KQF5_HUMAN	50Step_Domain_p250.0_to_300.0	250	300	50.0 AA STEP	50	0	0	2	4	3	-0.06	0.0161	1	4	DWILPSDYDHAEAEAR	DWILPSDYDHAEAEAR DWILPSDYDHAEAEAR	0	0	2	6	5
N/A	cDNA FLJ76826; highly similar to Homo sapiens ceruloplasmin (ferroxidase) (CP); mRNA	A8K5A4_HUMAN	50Step_Domain_p400.0_to_450.0	400	450	50.0 AA STEP	50	4	8	6	4	2	0.06	1	6	3	EYTDASFTNR GPEEEHLGILGPVIWAEVGDTIR ERGPEEEHLGILGPVIWAEVGDTIR EYTDASFTNR GPEEEHLGILGPVIWAEVGDTIR EYTDASFTNR	EYTDASFTNR EYTDASFTNR	6	11	2	3	2
N/A	Angiotensin 1-10	Q53GY3_HUMAN	50Step_Domain_p150.0_to_200.0	150	200	50.0 AA STEP	50	4	5	3	2	4	0.02	1	4	3	LQAILGVPWK VLSALQAVQGLLVAQGR ADSQAQLLLSTVVGVFTAPGLHLK LQAILGVPWK VLSALQAVQGLLVAQGR VLSALQAVQGLLVAQGR	VLSALQAVQGLLVAQGR VLSALQAVQGLLVAQGR	4	7	2	1	2
N/A	Angiotensin 1-10	Q86U78_HUMAN	50Step_Domain_p150.0_to_200.0	150	200	50.0 AA STEP	50	4	5	3	2	4	0.02	1	4	3	LQAILGVPWK VLSALQAVQGLLVAQGR ADSQAQLLLSTVVGVFTAPGLHLK LQAILGVPWK VLSALQAVQGLLVAQGR VLSALQAVQGLLVAQGR	VLSALQAVQGLLVAQGR VLSALQAVQGLLVAQGR	4	7	2	1	2
N/A	Angiotensin 1-10	Q59EP2_HUMAN	50Step_Domain_p150.0_to_200.0	150	200	50.0 AA STEP	50	4	3	3	2	4	0	1	3	3	LQAILGVPWK VLSALQAVQGLLVAQGR LQAILGVPWK VLSALQAVQGLLVAQGR VLSALQAVQGLLVAQGR	VLSALQAVQGLLVAQGR VLSALQAVQGLLVAQGR	4	4	2	1	2
N/A	Angiotensin 1-10	B4E1B3_HUMAN	50Step_Domain_p150.0_to_200.0	150	200	50.0 AA STEP	50	2	3	3	2	4	0	1	3	3	VLSALQAVQGLLVAQGR ADSQAQLLLSTVVGVFTAPGLHLK VLSALQAVQGLLVAQGR VLSALQAVQGLLVAQGR	VLSALQAVQGLLVAQGR VLSALQAVQGLLVAQGR	2	5	2	1	2
N/A	Activin beta-A chain	Q53H39_HUMAN	50Step_Domain_p200.0_to_250.0	200	250	50.0 AA STEP	50	3	3	1	2	4	-0.02	1	2	3	SELLLSEK STWHVFPVSSSIQR HPQGSLDTGEEAEEVGLKGER SELLLSEK SELLLSEK	STWHVFPVSSSIQR SELLLSEK	3	2	1	1	2
N/A	Chondroitin sulfate proteoglycan 2 (Versican) variant	Q59FG9_HUMAN	50Step_Domain_p600.0_to_650.0	600	650	50.0 AA STEP	50	0	0	3	3	3	-0.04	1	1	3	ITEEFLGK	ITEEFLGK ITEEFLGK	0	0	2	5	5
N/A	Chondroitin sulfate proteoglycan 2 (Versican) variant	Q59FG9_HUMAN	50Step_Domain_p650.0_to_700.0	650	700	50.0 AA STEP	50	0	0	3	3	3	-0.04	1	1	3	ITEEFLGK	ITEEFLGK ITEEFLGK	0	0	2	5	5
N/A	Macrophage-capping protein	B4DU58_HUMAN	50Step_Domain_p200.0_to_250.0	200	250	50.0 AA STEP	50	2	1	0	3	3	-0.04	0	1	3	EGNPEEDLTADK VSDATGQMNLTK EGNPEEDLTADK	EGNPEEDLTADK VSDATGQMNLTK EGNPEEDLTADK VSDATGQMNLTK	3	2	0	4	2
N/A	Tubulin alpha chain	A8JZY9_HUMAN	50Step_Domain_p50.0_to_100.0	50	100	50.0 AA STEP	50	0	3	0	3	3	-0.04	0.012	1	3	AVFVDLEPTVIDEVR QLFHPEQLITGK TIGGGDDSFNTFFSETGAGK	AVFVDLEPTVIDEVR TIGGGDDSFNTFFSETGAGK AVFVDLEPTVIDEVR	0	4	0	6	3
N/A	Tubulin alpha chain	B3KT06_HUMAN	50Step_Domain_p0_to_50	0	50	50.0 AA STEP	50	0	3	0	3	3	-0.04	0.0252	1	3	AVFVDLEPTVIDEVR QLFHPEQLITGK TIGGGDDSFNTFFSETGAGK	AVFVDLEPTVIDEVR TIGGGDDSFNTFFSETGAGK AVFVDLEPTVIDEVR	0	4	0	6	3
N/A	Frizzled-related protein 1	B2R6W4_HUMAN	50Step_Domain_p200.0_to_250.0	200	250	50.0 AA STEP	50	2	0	0	3	3	-0.04	0.014	1	3	SSLVNIPR	SSLVNIPR SSLVNIPR	1	0	0	5	5
N/A	Frizzled-related protein 1	B2R6W4_HUMAN	50Step_Domain_p250.0_to_300.0	250	300	50.0 AA STEP	50	2	0	0	2	4	-0.04	0.014	1	3	LLLVEGSIAEK	LLLVEGSIAEK LLLVEGSIAEK	1	0	0	4	7
N/A	cDNA FLJ76826; highly similar to Homo sapiens ceruloplasmin (ferroxidase) (CP); mRNA	A8K5A4_HUMAN	50Step_Domain_p800.0_to_850.0	800	850	50.0 AA STEP	50	8	12	12	5	0	0.18	0.0308	11	2	AEEEHLGILGPQLHADVGDK AEEEHLGILGPQLHADVGDK KAEEEHLGILGPQLHADVGDK AEEEHLGILGPQLHADVGDK	AEEEHLGILGPQLHADVGDK	13	16	4	4	0
N/A	cDNA; FLJ93141; highly similar to Homo sapiens coagulation factor XIII; A1 polypeptide (F13A1); mRNA	B2R6V9_HUMAN	50Step_Domain_p500.0_to_550.0	500	550	50.0 AA STEP	50	4	3	4	5	0	0.04	1	4	2	LALETALMYGAK SNVDMDFEVENAVLGK LALETALMYGAK SNVDMDFEVENAVLGK LALETALMYGAK SNVDMDFEVENAVLGK	SNVDMDFEVENAVLGK	7	6	6	2	0
N/A	cDNA FLJ76826; highly similar to Homo sapiens ceruloplasmin (ferroxidase) (CP); mRNA	A8K5A4_HUMAN	50Step_Domain_p950.0_to_1000.0	950	1000	50.0 AA STEP	50	2	4	0	3	2	0	1	2	2	DDEEFIESNK DDEEFIESNK VNKDDEEFIESNK	DDEEFIESNK DDEEFIESNK	3	5	0	2	2
N/A	Peptidyl-prolyl cis-trans isomerase	A8K486_HUMAN	50Step_Domain_p100.0_to_150.0	100	150	50.0 AA STEP	50	0	2	3	2	3	0	1	2	2	EGMNIVEAMER EGMNIVEAMER	EGMNIVEAMER EGMNIVEAMER	0	3	2	3	2
N/A	Peptidyl-prolyl cis-trans isomerase	B2RE56_HUMAN	50Step_Domain_p100.0_to_150.0	100	150	50.0 AA STEP	50	0	2	3	2	3	0	1	2	2	EGMNIVEAMER EGMNIVEAMER	EGMNIVEAMER EGMNIVEAMER	0	3	2	3	2
N/A	Peptidyl-prolyl cis-trans isomerase	Q71V99_HUMAN	50Step_Domain_p100.0_to_150.0	100	150	50.0 AA STEP	50	0	2	3	2	3	0	1	2	2	EGMNIVEAMER EGMNIVEAMER	EGMNIVEAMER EGMNIVEAMER	0	3	2	3	2
N/A	Peptidyl-prolyl cis-trans isomerase	A8K486_HUMAN	50Step_Domain_p50.0_to_100.0	50	100	50.0 AA STEP	50	3	1	0	2	3	-0.02	0.8648	1	2	FEDENFILK FEDENFILK	FEDENFILK FEDENFILK	1	2	0	3	2
N/A	Peptidyl-prolyl cis-trans isomerase	B2RE56_HUMAN	50Step_Domain_p50.0_to_100.0	50	100	50.0 AA STEP	50	3	1	0	2	3	-0.02	0.8648	1	2	FEDENFILK FEDENFILK	FEDENFILK FEDENFILK	1	2	0	3	2
N/A	Peptidyl-prolyl cis-trans isomerase	Q71V99_HUMAN	50Step_Domain_p50.0_to_100.0	50	100	50.0 AA STEP	50	3	1	0	2	3	-0.02	0.8648	1	2	FEDENFILK FEDENFILK	FEDENFILK FEDENFILK	1	2	0	3	2
N/A	Biglycan	B4DDQ2_HUMAN	50Step_Domain_p0_to_50	0	50	50.0 AA STEP	50	2	0	2	3	2	-0.02	1	1	2	VVQCSDLGLK VVQCSDLGLK	VVQCSDLGLK VVQCSDLGLK	1	0	3	4	3
N/A	Fibulin-1	Q8NBH6_HUMAN	50Step_Domain_p100.0_to_150.0	100	150	50.0 AA STEP	50	1	1	0	0	5	-0.02	1	1	2	IIEVEEEQEDPYLNDR IIEVEEEQEDPYLNDR	IIEVEEEQEDPYLNDR	2	2	0	0	1
N/A	C3/C5 convertase	B4E1Z4_HUMAN	50Step_Domain_p650.0_to_700.0	650	700	50.0 AA STEP	50	1	0	0	0	5	-0.04	1	0	2	WSGQTAICDNGAGYCSNPGIPIGTR	WSGQTAICDNGAGYCSNPGIPIGTR	1	0	0	0	2
N/A	Biglycan	A8K7E0_HUMAN	50Step_Domain_p350.0_to_368.0	350	368	50.0 AA STEP	18	0	0	1	4	1	-0.111111	1	0	2	LAIQFGNYK	AYYNGISLFNNPVPYWEVQPATFR LAIQFGNYK LAIQFGNYK	0	0	2	6	1
N/A	Biglycan	B4DDQ2_HUMAN	50Step_Domain_p300.0_to_334.0	300	334	50.0 AA STEP	34	0	0	1	4	1	-0.0588235	1	0	2	LAIQFGNYK	AYYNGISLFNNPVPYWEVQPATFR LAIQFGNYK LAIQFGNYK	0	0	2	6	1
N/A	Biglycan	Q53FI4_HUMAN	50Step_Domain_p350.0_to_368.0	350	368	50.0 AA STEP	18	0	0	1	4	1	-0.111111	1	0	2	LAIQFGNYK	AYYNGISLFNNPVPYWEVQPATFR LAIQFGNYK LAIQFGNYK	0	0	2	6	1
N/A	Biglycan	A6NLG9_HUMAN	50Step_Domain_p50.0_to_100.0	50	100	50.0 AA STEP	50	20	58	66	4	0	0.92	0.0126	48	2	GLQHLYALVLVNNK NHLVEIPPNLPSSLVELR GLQHLYALVLVNNK NHLVEIPPNLPSSLVELR GLQHLYALVLVNNK NHLVEIPPNLPSSLVELR	NHLVEIPPNLPSSLVELR	9	33	90	7	0
N/A	Mimecan	B4DI63_HUMAN	50Step_Domain_p250.0_to_300.0	250	300	50.0 AA STEP	50	36	6	25	0	4	0.4	0.0136	22	2	LNNLTFLYLDHNALESVPLNLPESLR LNNLTFLYLDHNALESVPLNLPESLR LNNLTFLYLDHNALESVPLNLPESLR	LNNLTFLYLDHNALESVPLNLPESLR	54	3	13	0	3
N/A	Chondroitin sulfate proteoglycan 2 (Versican) variant	Q59FG9_HUMAN	50Step_Domain_p3300.0_to_3350.0	3300	3350	50.0 AA STEP	50	3	4	3	2	2	0.02	1	3	2	YEINSLIR YEINSLIR YEINSLIR	YEINSLIR YEINSLIR	1	1	2	4	3
N/A	Semaphorin-3C	B4E2I9_HUMAN	50Step_Domain_p400.0_to_450.0	400	450	50.0 AA STEP	50	1	2	2	3	1	0	1	2	2	EFPDDVVTFIR EFPDDVVTFIR EFPDDVVTFIR	EFPDDVVTFIR EFPDDVVTFIR	1	2	2	3	1
N/A	Chondroitin sulfate proteoglycan 2 (Versican) variant	Q59FG9_HUMAN	50Step_Domain_p700.0_to_750.0	700	750	50.0 AA STEP	50	0	0	2	2	2	-0.02	1	1	2	TEEEVFSGMK	TEEEVFSGMK TEEEVFSGMK	0	0	1	4	3
N/A	Biglycan	A6NLG9_HUMAN	50Step_Domain_p300.0_to_307.0	300	307	50.0 AA STEP	7	0	0	1	3	1	-0.285714	1	0	2	LAIQFGNYK	LAIQFGNYK LAIQFGNYK	0	0	2	5	1
N/A	cDNA FLJ76037; highly similar to Homo sapiens matrilin 3 (MATN3); mRNA	A8K491_HUMAN	50Step_Domain_p200.0_to_250.0	200	250	50.0 AA STEP	50	4	3	0	1	2	0	1	2	2	AQASGIELYAVGVDR AQASGIELYAVGVDR	AQASGIELYAVGVDR AQASGIELYAVGVDR VAIIVTDGRPQDQVNEVAAR	1	1	0	1	3
N/A	C3/C5 convertase	B4E1Z4_HUMAN	50Step_Domain_p550.0_to_600.0	550	600	50.0 AA STEP	50	2	0	2	0	3	-0.02	1	1	2	STGSWSTLK STGSWSTLK	LLQEGQALEYVCPSGFYPYPVQTR	3	0	1	0	1
N/A	cDNA FLJ61290; highly similar to Neutral alpha-glucosidase AB	B4DJ30_HUMAN	50Step_Domain_p700.0_to_750.0	700	750	50.0 AA STEP	50	2	0	1	1	2	-0.02	1	1	2	NPEPELLVR NPEPELLVR	NPEPELLVR NPEPELLVR	2	0	1	1	1
N/A	cDNA FLJ76826; highly similar to Homo sapiens ceruloplasmin (ferroxidase) (CP); mRNA	A8K5A4_HUMAN	50Step_Domain_p150.0_to_200.0	150	200	50.0 AA STEP	50	1	2	0	3	0	-0.02	1	1	2	IYHSHIDAPK VYPGEQYTYMLLATEEQSPGEGDGNCVTR	IYHSHIDAPK VYPGEQYTYMLLATEEQSPGEGDGNCVTR	2	3	0	2	0
N/A	Calumenin	B3KQF5_HUMAN	50Step_Domain_p150.0_to_200.0	150	200	50.0 AA STEP	50	0	0	3	1	2	-0.02	1	1	2	DIVVQETMEDIDK	DIVVQETMEDIDK DIVVQETMEDIDK MADKDGDLIATK	0	0	3	2	3
N/A	Macrophage-capping protein	B2R9S4_HUMAN	50Step_Domain_p200.0_to_250.0	200	250	50.0 AA STEP	50	1	1	0	2	1	-0.02	0.3122	1	2	EGNPEEDLTADK EGNPEEDLTADK	EGNPEEDLTADK EGNPEEDLTADK	1	2	0	3	1
N/A	Frizzled-related protein 1	B2R6W4_HUMAN	50Step_Domain_p150.0_to_200.0	150	200	50.0 AA STEP	50	2	0	0	2	1	-0.02	1	1	2	NNYNYVIR	NNYNYVIR GVCISPEAIVTADGADFPMDSSNGNCR	1	0	0	3	1
N/A	cDNA FLJ61580; highly similar to Calsyntenin-1	B4E3Q1_HUMAN	50Step_Domain_p550.0_to_600.0	550	600	50.0 AA STEP	50	0	2	0	2	1	-0.02	1	1	2	EGLDLQVLEDSGR	EGLDLQVLEDSGR GVQIQAHPSQLVLTLEGEDLGELDK EGLDLQVLEDSGR QFPTPGIR	0	2	0	3	2
N/A	cDNA FLJ76826; highly similar to Homo sapiens ceruloplasmin (ferroxidase) (CP); mRNA	A8K5A4_HUMAN	50Step_Domain_p850.0_to_900.0	850	900	50.0 AA STEP	50	1	0	0	1	2	-0.04	1	0	2	SGAGTEDSACIPWAYYSTVDQVK	SGAGTEDSACIPWAYYSTVDQVK SGAGTEDSACIPWAYYSTVDQVK	2	0	0	1	2
N/A	C3/C5 convertase	B4E1Z4_HUMAN	50Step_Domain_p1250.0_to_1266.0	1250	1266	50.0 AA STEP	16	0	1	0	3	0	-0.125	1	0	2	DFHINLFQVLPWLK	LQDEDLGFL	0	1	0	1	0
N/A	cDNA; FLJ96197; highly similar to Homo sapiens connective tissue growth factor (CTGF); mRNA	B2RCP7_HUMAN	50Step_Domain_p150.0_to_200.0	150	200	50.0 AA STEP	50	1	0	0	2	1	-0.04	0.0091	0	2	LEDTFGPDPTMIR	DQTVVGPALAAYR LEDTFGPDPTMIR LEDTFGPDPTMIR	1	0	0	3	2
N/A	cDNA FLJ34961 fis; clone NTONG2003839; highly similar to CONNECTIVE TISSUE GROWTH FACTOR	B3KRV6_HUMAN	50Step_Domain_p100.0_to_150.0	100	150	50.0 AA STEP	50	1	0	0	2	1	-0.04	0.0091	0	2	LEDTFGPDPTMIR	DQTVVGPALAAYR LEDTFGPDPTMIR LEDTFGPDPTMIR	1	0	0	3	2
N/A	Osteopontin-D	F2YQ21_HUMAN	50Step_Domain_p150.0_to_200.0	150	200	50.0 AA STEP	50	0	0	1	1	2	-0.04	0.0348	0	2	AIPVAQDLNAPSDWDSR	AIPVAQDLNAPSDWDSR AIPVAQDLNAPSDWDSR	0	0	1	2	4
N/A	cDNA PSEC0172 fis; clone PLACE1011835; highly similar to Procollagen C-endopeptidase enhancer 2	B3KQT8_HUMAN	50Step_Domain_p300.0_to_350.0	300	350	50.0 AA STEP	50	3	8	2	2	0	0.06	0.4536	4	1	DGSLHATVSIINIYK EGNLAIQQAGK DGSLHATVSIINIYK TGTLEGNYCSSDFVLAGTVITTITR DGSLHATVSIINIYK EGNLAIQQAGK	EGNLAIQQAGK	2	10	2	2	0
N/A	Procollagen C-endopeptidase enhancer 2 variant	Q53EK6_HUMAN	50Step_Domain_p300.0_to_350.0	300	350	50.0 AA STEP	50	3	8	2	2	0	0.06	0.4536	4	1	DGSLHATVSIINIYK EGNLAIQQAGK DGSLHATVSIINIYK TGTLEGNYCSSDFVLAGTVITTITR DGSLHATVSIINIYK EGNLAIQQAGK	EGNLAIQQAGK	2	10	2	2	0
N/A	Activin beta-A chain	Q53H39_HUMAN	50Step_Domain_p50.0_to_100.0	50	100	50.0 AA STEP	50	3	1	1	0	2	0.02	1	2	1	AALLNAIR DVPNSQPEMVEAVK RPDVTQPVPK AALLNAIR AALLNAIR DVPNSQPEMVEAVK	DVPNSQPEMVEAVK	3	1	2	0	1
N/A	Semaphorin-3C	B4E2I9_HUMAN	50Step_Domain_p0_to_50	0	50	50.0 AA STEP	50	2	2	1	0	2	0.02	1	2	1	VYLTFDELR VYLTFDELR VYLTFDELR	VYLTFDELR	2	2	1	0	2
N/A	Angiotensin 1-10	Q53GY3_HUMAN	50Step_Domain_p250.0_to_300.0	250	300	50.0 AA STEP	50	2	1	0	0	2	0	1	1	1	FMQAVTGWK FMQAVTGWK	FMQAVTGWK	2	2	0	0	1
N/A	Angiotensin 1-10	Q86U78_HUMAN	50Step_Domain_p250.0_to_300.0	250	300	50.0 AA STEP	50	2	1	0	0	2	0	1	1	1	FMQAVTGWK FMQAVTGWK	FMQAVTGWK	2	2	0	0	1
N/A	cDNA FLJ61580; highly similar to Calsyntenin-1	B4E3Q1_HUMAN	50Step_Domain_p350.0_to_400.0	350	400	50.0 AA STEP	50	0	0	3	1	1	0	1	1	1	IPDGVVSVSPK	IPDGVVSVSPK IPDGVVSVSPK	0	0	2	1	2
N/A	Tubulin alpha chain	B3KT06_HUMAN	50Step_Domain_p50.0_to_100.0	50	100	50.0 AA STEP	50	0	3	0	1	1	0	1	1	1	EIIDLVLDR QLFHPEQLITGK	EIIDLVLDR EIIDLVLDR	0	4	0	2	1
N/A	Calumenin	B3KQF5_HUMAN	50Step_Domain_p200.0_to_250.0	200	250	50.0 AA STEP	50	0	0	3	1	1	0	1	1	1	DIVVQETMEDIDK	DIVVQETMEDIDK DIVVQETMEDIDK	0	0	3	2	1
N/A	Chondroitin sulfate proteoglycan 2 (Versican) variant	Q59FG9_HUMAN	50Step_Domain_p3150.0_to_3200.0	3150	3200	50.0 AA STEP	50	0	0	2	1	1	0	1	1	1	NGATCVDGFNTFR	NGATCVDGFNTFR NGATCVDGFNTFR	0	0	1	1	1
N/A	Chordin	B7Z1H7_HUMAN	50Step_Domain_p500.0_to_550.0	500	550	50.0 AA STEP	50	2	0	0	1	1	0	1	1	1	DLEPELLR	DLEPELLR DLEPELLR	1	0	0	1	2
N/A	cDNA; FLJ93141; highly similar to Homo sapiens coagulation factor XIII; A1 polypeptide (F13A1); mRNA	B2R6V9_HUMAN	50Step_Domain_p0_to_50	0	50	50.0 AA STEP	50	2	0	0	2	0	0	1	1	1	AVPPNNSNAAEDDLPTVELQGVVPR	AVPPNNSNAAEDDLPTVELQGVVPR	3	0	0	1	0
N/A	Vitamin K-dependent protein S	Q9NSD0_HUMAN	50Step_Domain_p300.0_to_350.0	300	350	50.0 AA STEP	50	1	1	0	2	0	0	1	1	1	FSAEFDFR ITTGGDVINNGLWNMVSVEELEHSISIK	FSAEFDFR	1	2	0	1	0
N/A	Activin beta-A chain	Q53H39_HUMAN	50Step_Domain_p0_to_50	0	50	50.0 AA STEP	50	1	0	1	0	2	0	1	1	1	DVPNSQPEMVEAVK DVPNSQPEMVEAVK	DVPNSQPEMVEAVK	1	0	1	0	1
N/A	cDNA FLJ61580; highly similar to Calsyntenin-1	B4E3Q1_HUMAN	50Step_Domain_p500.0_to_550.0	500	550	50.0 AA STEP	50	0	2	0	1	1	0	1	1	1	EGLDLQVLEDSGR	EGLDLQVLEDSGR EGLDLQVLEDSGR	0	2	0	2	1
N/A	Tubulin alpha chain	A8JZY9_HUMAN	50Step_Domain_p100.0_to_150.0	100	150	50.0 AA STEP	50	0	2	0	1	1	0	1	1	1	EIIDLVLDR	EIIDLVLDR EIIDLVLDR	0	2	0	2	1
N/A	Macrophage-capping protein	B2R9S4_HUMAN	50Step_Domain_p250.0_to_300.0	250	300	50.0 AA STEP	50	1	0	0	1	1	-0.02	0.7147	0	1	VSDATGQMNLTK	VSDATGQMNLTK VSDATGQMNLTK	2	0	0	1	1
N/A	Vitamin K-dependent protein S	Q9NSD0_HUMAN	50Step_Domain_p250.0_to_300.0	250	300	50.0 AA STEP	50	1	0	0	2	0	-0.02	1	0	1	FSAEFDFR	FSAEFDFR	1	0	0	1	0
N/A	cDNA; FLJ96197; highly similar to Homo sapiens connective tissue growth factor (CTGF); mRNA	B2RCP7_HUMAN	50Step_Domain_p250.0_to_300.0	250	300	50.0 AA STEP	50	1	0	0	1	1	-0.02	0.3248	0	1	TTTLPVEFK	TTTLPVEFK TTTLPVEFK	2	0	0	1	1
N/A	cDNA; FLJ96197; highly similar to Homo sapiens connective tissue growth factor (CTGF); mRNA	B2RCP7_HUMAN	50Step_Domain_p300.0_to_349.0	300	349	50.0 AA STEP	49	1	0	0	1	1	-0.0204082	0.3248	0	1	TTTLPVEFK	TTTLPVEFK TTTLPVEFK	2	0	0	1	1
N/A	cDNA FLJ34961 fis; clone NTONG2003839; highly similar to CONNECTIVE TISSUE GROWTH FACTOR	B3KRV6_HUMAN	50Step_Domain_p200.0_to_250.0	200	250	50.0 AA STEP	50	1	0	0	1	1	-0.02	0.3248	0	1	TTTLPVEFK	TTTLPVEFK TTTLPVEFK	2	0	0	1	1
N/A	cDNA FLJ34961 fis; clone NTONG2003839; highly similar to CONNECTIVE TISSUE GROWTH FACTOR	B3KRV6_HUMAN	50Step_Domain_p250.0_to_300.0	250	300	50.0 AA STEP	50	1	0	0	1	1	-0.02	0.3248	0	1	TTTLPVEFK	TTTLPVEFK TTTLPVEFK	2	0	0	1	1
N/A	Semaphorin-3C	B4E2I9_HUMAN	50Step_Domain_p150.0_to_200.0	150	200	50.0 AA STEP	50	1	0	0	2	0	-0.02	1	0	1	SEDQVFMIDSK	SEDQVFMIDSK	1	0	0	2	0
N/A	Calreticulin variant	Q53G71_HUMAN	50Step_Domain_p150.0_to_200.0	150	200	50.0 AA STEP	50	0	1	0	1	1	-0.02	0.4257	0	1	IKDPDASKPEDWDER	IDNSQVESGSLEDDWDFLPPK IDNSQVESGSLEDDWDFLPPK	0	1	0	2	1
N/A	Tubulin alpha chain	A8JZY9_HUMAN	50Step_Domain_p0_to_50	0	50	50.0 AA STEP	50	0	1	0	2	0	-0.02	1	0	1	TIGGGDDSFNTFFSETGAGK	TIGGGDDSFNTFFSETGAGK	0	1	0	3	0
N/A	Calumenin	B3KQF5_HUMAN	50Step_Domain_p50.0_to_100.0	50	100	50.0 AA STEP	50	0	0	1	1	1	-0.02	1	0	1	IDGDKDGFVTVDELK	IDGDKDGFVTVDELK IDGDKDGFVTVDELK TFDQLTPEESK	0	0	1	2	2
N/A	Alpha-1;4 glucan phosphorylase	Q59GM9_HUMAN	50Step_Domain_p500.0_to_550.0	500	550	50.0 AA STEP	50	0	0	1	1	1	-0.02	0.4302	0	1	LLPLVSDEVFIR	IGEEFLTDLSQLK LLPLVSDEVFIR IGEEFLTDLSQLK	0	0	1	2	1
N/A	Alpha-1;4 glucan phosphorylase	Q59GM9_HUMAN	50Step_Domain_p700.0_to_750.0	700	750	50.0 AA STEP	50	0	0	1	1	1	-0.02	0.4302	0	1	VEDVEALDR	VEDVEALDR VEDVEALDR	0	0	1	2	1
N/A	Osteopontin-D	F2YQ21_HUMAN	50Step_Domain_p250.0_to_292.0	250	292	50.0 AA STEP	42	0	0	1	1	1	-0.0238095	0.543	0	1	ISHELDSASSEVN	ISHELDSASSEVN ISHELDSASSEVN	0	0	1	2	2
N/A	Peptidyl-prolyl cis-trans isomerase	A8K486_HUMAN	50Step_Domain_p0_to_50	0	50	50.0 AA STEP	50	3	2	3	1	0	0.06	0.1284	3	0	VSFELFADK VSFELFADK VSFELFADKVPK VSFELFADK	VSFELFADK	1	4	2	1	0
N/A	Peptidyl-prolyl cis-trans isomerase	B2RE56_HUMAN	50Step_Domain_p0_to_50	0	50	50.0 AA STEP	50	3	2	3	1	0	0.06	0.1284	3	0	VSFELFADK VSFELFADK VSFELFADKVPK VSFELFADK	VSFELFADK	1	4	2	1	0
N/A	Peptidyl-prolyl cis-trans isomerase	Q71V99_HUMAN	50Step_Domain_p0_to_50	0	50	50.0 AA STEP	50	3	2	3	1	0	0.06	0.1284	3	0	VSFELFADK VSFELFADK VSFELFADKVPK VSFELFADK	VSFELFADK	1	4	2	1	0
N/A	cDNA FLJ61290; highly similar to Neutral alpha-glucosidase AB	B4DJ30_HUMAN	50Step_Domain_p250.0_to_300.0	250	300	50.0 AA STEP	50	1	1	3	1	0	0.04	0.072	2	0	DEPGAWEETFK DPAEGDGAQPEETPR DEPGAWEETFK DPAEGDGAQPEETPR VSQGSKDPAEGDGAQPEETPR	DEPGAWEETFK	1	1	4	1	0
N/A	Semaphorin-3C	B4E2I9_HUMAN	50Step_Domain_p600.0_to_650.0	600	650	50.0 AA STEP	50	2	1	1	1	0	0.02	1	1	0	NAAEIVQYGVK IIATSQGLLIR IIATSQGLLIR	NAAEIVQYGVK	2	1	1	1	0
N/A	Semaphorin-3C	B4E2I9_HUMAN	50Step_Domain_p650.0_to_700.0	650	700	50.0 AA STEP	50	1	2	1	0	1	0.02	1	1	0	VLDSEMVAVVTDK VLDSEMVAVVTDK VLDSEMVAVVTDK	VLDSEMVAVVTDK	1	2	1	0	1
N/A	cDNA FLJ61580; highly similar to Calsyntenin-1	B4E3Q1_HUMAN	50Step_Domain_p600.0_to_650.0	600	650	50.0 AA STEP	50	0	2	2	1	0	0.02	1	1	0	AASEFESSEGVFLFPELR AASEFESSEGVFLFPELR	AASEFESSEGVFLFPELR	0	2	1	2	0
N/A	cDNA FLJ61580; highly similar to Calsyntenin-1	B4E3Q1_HUMAN	50Step_Domain_p650.0_to_700.0	650	700	50.0 AA STEP	50	0	2	2	1	0	0.02	1	1	0	AASEFESSEGVFLFPELR AASEFESSEGVFLFPELR	AASEFESSEGVFLFPELR	0	2	1	2	0
N/A	HCG1991735; isoform CRA_a	A0A024RC65_HUMAN	50Step_Domain_p1450.0_to_1500.0	1450	1500	50.0 AA STEP	50	1	2	0	1	0	0.02	1	1	0	EDSNLTLQEK LTELGTVDPK YQELINDIAR	LTELGTVDPK	1	2	0	1	0
N/A	Chordin	B7Z1H7_HUMAN	50Step_Domain_p250.0_to_300.0	250	300	50.0 AA STEP	50	2	0	0	0	1	0.02	1	1	0	SGGLTQVPLR	SGGLTQVPLR	1	0	0	0	1
N/A	cDNA FLJ76826; highly similar to Homo sapiens ceruloplasmin (ferroxidase) (CP); mRNA	A8K5A4_HUMAN	50Step_Domain_p100.0_to_150.0	100	150	50.0 AA STEP	50	0	2	0	1	0	0.02	1	1	0	VYPGEQYTYMLLATEEQSPGEGDGNCVTR	VYPGEQYTYMLLATEEQSPGEGDGNCVTR	0	3	0	1	0
N/A	HCG1991735; isoform CRA_a	A0A024RC65_HUMAN	50Step_Domain_p500.0_to_550.0	500	550	50.0 AA STEP	50	0	2	0	1	0	0.02	1	1	0	ILAIGLINEALDEGDAQK	ILAIGLINEALDEGDAQK	0	2	0	2	0
N/A	HCG1991735; isoform CRA_a	A0A024RC65_HUMAN	50Step_Domain_p550.0_to_600.0	550	600	50.0 AA STEP	50	0	2	0	1	0	0.02	1	1	0	ILAIGLINEALDEGDAQK	ILAIGLINEALDEGDAQK	0	2	0	2	0
N/A	HCG1991735; isoform CRA_a	A0A024RC65_HUMAN	50Step_Domain_p850.0_to_900.0	850	900	50.0 AA STEP	50	1	1	0	1	0	0.02	1	1	0	EEVITLIR EEVITLIR	EEVITLIR	1	1	0	1	0
N/A	HCG1991735; isoform CRA_a	A0A024RC65_HUMAN	50Step_Domain_p900.0_to_950.0	900	950	50.0 AA STEP	50	1	1	0	1	0	0.02	1	1	0	EEVITLIR EEVITLIR	EEVITLIR	1	1	0	1	0
N/A	HCG1991735; isoform CRA_a	A0A024RC65_HUMAN	50Step_Domain_p1000.0_to_1050.0	1000	1050	50.0 AA STEP	50	1	1	0	1	0	0.02	1	1	0	TALQEEIK VDQIQEIVTGNPTVIK	TALQEEIK VDQIQEIVTGNPTVIK	1	1	0	2	0
N/A	cDNA FLJ61564; highly similar to Plexin domain-containing protein 2	B4E367_HUMAN	50Step_Domain_p100.0_to_150.0	100	150	50.0 AA STEP	50	1	1	0	0	1	0.02	1	1	0	DLWVNIDQMEK DLWVNIDQMEK	DLWVNIDQMEK	1	1	0	0	1
N/A	Semaphorin-3C	B4E2I9_HUMAN	50Step_Domain_p500.0_to_550.0	500	550	50.0 AA STEP	50	2	0	0	0	1	0.02	1	1	0	QQLYVSSNEGVSQVSLHR	QQLYVSSNEGVSQVSLHR	2	0	0	0	1
N/A	Semaphorin-3C	B4E2I9_HUMAN	50Step_Domain_p550.0_to_600.0	550	600	50.0 AA STEP	50	2	0	0	1	0	0.02	1	1	0	NAAEIVQYGVK	NAAEIVQYGVK	2	0	0	1	0
N/A	cDNA FLJ61290; highly similar to Neutral alpha-glucosidase AB	B4DJ30_HUMAN	50Step_Domain_p450.0_to_500.0	450	500	50.0 AA STEP	50	0	1	0	1	0	0	1	0	0	YFTWDPSR	YFTWDPSR	0	1	0	1	0
N/A	HCG1991735; isoform CRA_a	A0A024RC65_HUMAN	50Step_Domain_p450.0_to_500.0	450	500	50.0 AA STEP	50	1	0	0	1	0	0	1	0	0	ALESGDVNTVWK	ALESGDVNTVWK	1	0	0	1	0
N/A	HCG1991735; isoform CRA_a	A0A024RC65_HUMAN	50Step_Domain_p1050.0_to_1100.0	1050	1100	50.0 AA STEP	50	0	1	0	1	0	0	1	0	0	VDQIQEIVTGNPTVIK	VDQIQEIVTGNPTVIK	0	1	0	1	0
N/A	Alpha-1;4 glucan phosphorylase	Q59GM9_HUMAN	50Step_Domain_p550.0_to_600.0	550	600	50.0 AA STEP	50	0	0	1	1	0	0	1	0	0	LLPLVSDEVFIR	LLPLVSDEVFIR	0	0	1	1	0
N/A	Alpha-1;4 glucan phosphorylase	Q59GM9_HUMAN	50Step_Domain_p650.0_to_700.0	650	700	50.0 AA STEP	50	0	0	1	1	0	0	1	0	0	VIFLENYR	VIFLENYR	0	0	1	1	0
N/A	Alpha-1;4 glucan phosphorylase	Q59GM9_HUMAN	50Step_Domain_p750.0_to_800.0	750	800	50.0 AA STEP	50	0	0	1	1	0	0	1	0	0	QAVDQISSGFFSPK	EYYDHLPELK QAVDQISSGFFSPK	0	0	1	2	0
N/A	Osteopontin-D	F2YQ21_HUMAN	50Step_Domain_p100.0_to_150.0	100	150	50.0 AA STEP	50	0	0	1	1	0	0	1	0	0	GDSVVYGLR	GDSVVYGLR	0	0	1	1	0
NEO1	Neogenin	NEO1_HUMAN	50Step_Domain_p400.0_to_450.0	400	450	50.0 AA STEP	50	0	1	0	1	1	-0.02	0.12	0	1	DVVASLVSTR	DVVASLVSTR DVVASLVSTR	0	1	0	1	1
NEO1	Neogenin	NEO1_HUMAN	50Step_Domain_p450.0_to_500.0	450	500	50.0 AA STEP	50	0	1	0	1	1	-0.02	0.12	0	1	DVVASLVSTR	DVVASLVSTR DVVASLVSTR	0	1	0	1	1
OAF	Out at first protein homolog	OAF_HUMAN	50Step_Domain_p150.0_to_200.0	150	200	50.0 AA STEP	50	2	2	3	6	6	-0.08	0.0072	2	6	ASEQAELPR FWLEQGVDSSVFEALPK FWLEQGVDSSVFEALPK FWLEQGVDSSVFEALPK	ASEQAELPR FWLEQGVDSSVFEALPK ASEQAELPR FWLEQGVDSSVFEALPK	3	2	5	8	3
OAF	Out at first protein homolog	OAF_HUMAN	50Step_Domain_p200.0_to_250.0	200	250	50.0 AA STEP	50	1	0	0	5	4	-0.08	0.0024	0	4	ASEQAELPR	ASEQAELPR ASEQAELPR	1	0	0	6	2
OAF	Out at first protein homolog	OAF_HUMAN	50Step_Domain_p50.0_to_100.0	50	100	50.0 AA STEP	50	9	7	7	4	2	0.1	0.0006	8	3	ALILGELEK LPDGQVTEESLQADSDADSISLELR ALILGELEK LPDGQVTEESLQADSDADSISLELR ALILGELEK LPDGQVTEESLQADSDADSISLELR	ALILGELEK LPDGQVTEESLQADSDADSISLELR ALILGELEK	11	6	11	5	1
OAF	Out at first protein homolog	OAF_HUMAN	50Step_Domain_p250.0_to_273.0	250	273	50.0 AA STEP	23	1	2	1	2	4	-0.0869565	0.5946	1	3	SYSFDFYVPQR SYSFDFYVPQR SYSFDFYVPQR	SYSFDFYVPQR SYSFDFYVPQR	1	2	2	2	2
OAF	Out at first protein homolog	OAF_HUMAN	50Step_Domain_p0_to_50	0	50	50.0 AA STEP	50	6	2	5	2	0	0.06	0.0162	4	1	LPDGQVTEESLQADSDADSISLELR LPDGQVTEESLQADSDADSISLELR LPDGQVTEESLQADSDADSISLELR	LPDGQVTEESLQADSDADSISLELR	8	2	8	2	0
okuribin	Nuclear envelope protein okuribin	A3KC71_HUMAN	50Step_Domain_p650.0_to_700.0	650	700	50.0 AA STEP	50	4	8	15	25	16	-0.22	0	9	20	IDHFQLDNEKPMR VVDDEDLVDQR IDHFQLDNEKPMR VVDDEDLVDQR VVDDEDLVDQR	VVDDEDLVDQR VVDDEDLVDQR	4	10	20	17	11
okuribin	Nuclear envelope protein okuribin	A3KC71_HUMAN	50Step_Domain_p250.0_to_300.0	250	300	50.0 AA STEP	50	12	13	10	10	13	0	1	12	12	ASGVEGQVVAEGNDGGGGAGRPSLGSEK LEAMYEVIDQGPIR ASGVEGQVVAEGNDGGGGAGRPSLGSEK LEAMYEVIDQGPIR ASGVEGQVVAEGNDGGGGAGRPSLGSEK LEAMYEVIDQGPIR	ASGVEGQVVAEGNDGGGGAGRPSLGSEK LEAMYEVIDQGPIR ASGVEGQVVAEGNDGGGGAGRPSLGSEK LEAMYEVIDQGPIR	14	16	13	7	9
okuribin	Nuclear envelope protein okuribin	A3KC71_HUMAN	50Step_Domain_p600.0_to_650.0	600	650	50.0 AA STEP	50	7	8	5	7	9	-0.02	1	7	8	LLLITAPK SVADLLGSFEGK LLLITAPK SVADLLGSFEGK LLLITAPK SVADLLGSFEGK	LLLITAPK SVADLLGSFEGK LLLITAPK SVADLLGSFEGK	8	10	7	5	6
okuribin	Nuclear envelope protein okuribin	A3KC71_HUMAN	50Step_Domain_p700.0_to_750.0	700	750	50.0 AA STEP	50	8	8	7	1	6	0.08	0.3116	8	4	QYYEVPITMK SVFDLIDTFQSR EYGMTYNDFFMVLTDVDLR QYYEVPITMK SVFDLIDTFQSR QYYEVPITMK SVFDLIDTFQSR	SVFDLIDTFQSR SVFDLIDTFQSR	9	10	9	1	4
okuribin	Nuclear envelope protein okuribin	A3KC71_HUMAN	50Step_Domain_p200.0_to_250.0	200	250	50.0 AA STEP	50	6	3	6	3	4	0.02	1	5	4	ITSEGQILEQPLDPSLIPK ITSEGQILEQPLDPSLIPK ITSEGQILEQPLDPSLIPK	ITSEGQILEQPLDPSLIPK ITSEGQILEQPLDPSLIPK	7	4	8	2	3
okuribin	Nuclear envelope protein okuribin	A3KC71_HUMAN	50Step_Domain_p750.0_to_800.0	750	800	50.0 AA STEP	50	4	3	2	3	3	0	1	3	3	QSLENFLSR QSLENFLSR QSLENFLSR	QSLENFLSR QSLENFLSR	4	4	3	2	2
okuribin	Nuclear envelope protein okuribin	A3KC71_HUMAN	50Step_Domain_p50.0_to_100.0	50	100	50.0 AA STEP	50	0	1	1	3	3	-0.04	1	1	3	STLEEPNLQPLQR STLEEPNLQPLQR	STLEEPNLQPLQR STLEEPNLQPLQR	0	1	1	2	2
okuribin	Nuclear envelope protein okuribin	A3KC71_HUMAN	50Step_Domain_p300.0_to_350.0	300	350	50.0 AA STEP	50	3	2	2	1	4	0	1	2	2	ASGVEGQVVAEGNDGGGGAGRPSLGSEK ASGVEGQVVAEGNDGGGGAGRPSLGSEK ASGVEGQVVAEGNDGGGGAGRPSLGSEK	ASGVEGQVVAEGNDGGGGAGRPSLGSEK ASGVEGQVVAEGNDGGGGAGRPSLGSEK	3	3	3	1	3
okuribin	Nuclear envelope protein okuribin	A3KC71_HUMAN	50Step_Domain_p100.0_to_150.0	100	150	50.0 AA STEP	50	2	1	0	1	1	0	1	1	1	FPSGSSSPNILASFAGK FPSGSSSPNILASFAGK	FPSGSSSPNILASFAGK FPSGSSSPNILASFAGK	2	1	0	1	1
okuribin	Nuclear envelope protein okuribin	A3KC71_HUMAN	50Step_Domain_p150.0_to_200.0	150	200	50.0 AA STEP	50	5	11	8	1	0	0.16	0	8	0	HIQQIVLFHQAGEEGGK VWVISAPHASEGYYR HIQQIVLFHQAGEEGGK VWVISAPHASEGYYR HIQQIVLFHQAGEEGGK VWVISAPHASEGYYR	VWVISAPHASEGYYR	6	14	10	1	0
okuribin	Nuclear envelope protein okuribin	A3KC71_HUMAN	50Step_Domain_p850.0_to_900.0	850	900	50.0 AA STEP	50	4	1	0	0	1	0.04	1	2	0	EDVPAHLVK NYFQVSPEYFSMLLVGK NYFQVSPEYFSMLLVGK	EDVPAHLVK	5	1	0	0	1
okuribin	Nuclear envelope protein okuribin	A3KC71_HUMAN	50Step_Domain_p500.0_to_550.0	500	550	50.0 AA STEP	50	0	1	2	1	0	0.02	1	1	0	ILSNEYEEK ILSNEYEEK	ILSNEYEEK	0	1	2	1	0
okuribin	Nuclear envelope protein okuribin	A3KC71_HUMAN	50Step_Domain_p450.0_to_500.0	450	500	50.0 AA STEP	50	0	0	1	0	1	0	1	0	0	DPNVVPGPPKPAK	DPNVVPGPPKPAK	0	0	1	0	1
okuribin	Nuclear envelope protein okuribin	A3KC71_HUMAN	50Step_Domain_p800.0_to_850.0	800	850	50.0 AA STEP	50	1	0	0	0	1	0	1	0	0	EDVPAHLVK	EDVPAHLVK	1	0	0	0	1
OMD	Osteomodulin	OMD_HUMAN	50Step_Domain_p150.0_to_200.0	150	200	50.0 AA STEP	50	4	6	2	5	7	-0.04	0.5202	4	6	LLLGYNEISK LLLGYNEISK LPNLLQLHLEHNNLEEFPFPLPK LLLGYNEISK	LLLGYNEISK LLLGYNEISK	3	5	2	4	5
OMD	Osteomodulin	OMD_HUMAN	50Step_Domain_p100.0_to_150.0	100	150	50.0 AA STEP	50	1	5	3	4	3	-0.02	1	3	4	IDYGVFAK IDYGVFAK LPNLLQLHLEHNNLEEFPFPLPK IDYGVFAK	IDYGVFAK IDYGVFAK	1	4	4	3	2
OMD	Osteomodulin	OMD_HUMAN	50Step_Domain_p300.0_to_350.0	300	350	50.0 AA STEP	50	4	0	5	1	0	0.06	0.1782	3	0	NLEHLYLQNNEIEK NLEHLYLQNNEIEK	NLEHLYLQNNEIEK	3	0	6	1	0
ORM1	Alpha-1-acid glycoprotein 1	A1AG1_HUMAN	50Step_Domain_p100.0_to_150.0	100	150	50.0 AA STEP	50	24	28	13	12	0	0.32	0.0225	22	6	NWGLSVYADKPETTK TYMLAFDVNDEK YVGGQEHFAHLLILR NWGLSVYADKPETTK TYMLAFDVNDEK YVGGQEHFAHLLILR NWGLSVYADKPETTK TYMLAFDVNDEK YVGGQEHFAHLLILR	TYMLAFDVNDEK	48	32	4	1	0
ORM1	Alpha-1-acid glycoprotein 1	A1AG1_HUMAN	50Step_Domain_p150.0_to_200.0	150	200	50.0 AA STEP	50	11	11	16	12	0	0.14	0.8785	13	6	NWGLSVYADKPETTK SDVVYTDWK EQLGEFYEALDCLR NWGLSVYADKPETTK SDVVYTDWK NWGLSVYADKPETTK SDVVYTDWK	SDVVYTDWK	21	13	5	1	0
ORM1	Alpha-1-acid glycoprotein 1	A1AG1_HUMAN	50Step_Domain_p50.0_to_100.0	50	100	50.0 AA STEP	50	7	4	13	12	0	0.04	1	8	6	TEDTIFLR WFYIASAFR TEDTIFLR WFYIASAFR TEDTIFLR	TEDTIFLR	14	5	4	1	0
P4HB	Protein disulfide-isomerase	PDIA1_HUMAN	50Step_Domain_p50.0_to_100.0	50	100	50.0 AA STEP	50	2	2	1	1	4	0	1	2	2	VDATEESDLAQQYGVR VDATEESDLAQQYGVR VDATEESDLAQQYGVR	VDATEESDLAQQYGVR VDATEESDLAQQYGVR	1	2	1	2	3
P4HB	Protein disulfide-isomerase	PDIA1_HUMAN	50Step_Domain_p300.0_to_350.0	300	350	50.0 AA STEP	50	2	4	5	1	3	0.04	0.3817	4	2	LITLEEEMTK ILEFFGLK LITLEEEMTK YKPESEELTAER ILEFFGLK LITLEEEMTK YKPESEELTAER	ILEFFGLK YKPESEELTAER ILEFFGLK LITLEEEMTK	1	4	7	2	2
P4HB	Protein disulfide-isomerase	PDIA1_HUMAN	50Step_Domain_p400.0_to_450.0	400	450	50.0 AA STEP	50	2	1	2	3	1	0	1	2	2	MDSTANEVEAVK MDSTANEVEAVK MDSTANEVEAVK	MDSTANEVEAVK QLAPIWDK MDSTANEVEAVK	1	1	3	5	1
P4HB	Protein disulfide-isomerase	PDIA1_HUMAN	50Step_Domain_p350.0_to_400.0	350	400	50.0 AA STEP	50	2	1	0	1	0	0.02	1	1	0	NFEDVAFDEK NFEDVAFDEK	NFEDVAFDEK	1	1	0	1	0
P4HB	Protein disulfide-isomerase	PDIA1_HUMAN	50Step_Domain_p200.0_to_250.0	200	250	50.0 AA STEP	50	0	1	1	1	0	0.02	1	1	0	ENLLDFIK ENLLDFIK	ENLLDFIK	0	1	1	1	0
PCOLCE	Procollagen C-endopeptidase enhancer 1	PCOC1_HUMAN	50Step_Domain_p350.0_to_400.0	350	400	50.0 AA STEP	50	10	20	20	25	22	-0.14	0.5337	17	24	GVSYLLMGQVEENR TGGLDLPSPPTGASLK EPGEGLAVTVSLIGAYK GVSYLLMGQVEENR TGGLDLPSPPTGASLK GVSYLLMGQVEENR TGGLDLPSPPTGASLK	GVSYLLMGQVEENR TGGLDLPSPPTGASLK EPGEGLAVTVSLIGAYK GVSYLLMGQVEENR TGGLDLPSPPTGASLK	4	9	16	40	32
PCOLCE	Procollagen C-endopeptidase enhancer 1	PCOC1_HUMAN	50Step_Domain_p400.0_to_449.0	400	449	50.0 AA STEP	49	2	2	5	20	13	-0.265306	0.0054	3	16	GVSYLLMGQVEENR GVSYLLMGQVEENR GVSYLLMGQVEENR	GVSYLLMGQVEENR GVSYLLMGQVEENR	1	1	4	32	19
PCOLCE	Procollagen C-endopeptidase enhancer 1	PCOC1_HUMAN	50Step_Domain_p50.0_to_100.0	50	100	50.0 AA STEP	50	22	11	11	8	8	0.14	0.5877	15	8	GESGYVASEGFPNLYPPNK YDALEVFAGSGTSGQR YDALEVFAGSGTSGQR GESGYVASEGFPNLYPPNK YDALEVFAGSGTSGQR	GESGYVASEGFPNLYPPNK YDALEVFAGSGTSGQR GESGYVASEGFPNLYPPNK YDALEVFAGSGTSGQR	9	5	9	12	11
PCOLCE	Procollagen C-endopeptidase enhancer 1	PCOC1_HUMAN	50Step_Domain_p0_to_50	0	50	50.0 AA STEP	50	17	0	6	4	4	0.08	1	8	4	GESGYVASEGFPNLYPPNK GESGYVASEGFPNLYPPNK	GESGYVASEGFPNLYPPNK GESGYVASEGFPNLYPPNK	7	0	5	7	6
PCOLCE	Procollagen C-endopeptidase enhancer 1	PCOC1_HUMAN	50Step_Domain_p100.0_to_150.0	100	150	50.0 AA STEP	50	5	11	5	3	3	0.08	1	7	3	YDALEVFAGSGTSGQR YDALEVFAGSGTSGQR YDALEVFAGSGTSGQR	YDALEVFAGSGTSGQR YDALEVFAGSGTSGQR	2	5	4	5	5
PCOLCE	Procollagen C-endopeptidase enhancer 1	PCOC1_HUMAN	50Step_Domain_p200.0_to_250.0	200	250	50.0 AA STEP	50	2	2	2	1	3	0	1	2	2	YDSVSVFNGAVSDDSR YDSVSVFNGAVSDDSR YDSVSVFNGAVSDDSR	YDSVSVFNGAVSDDSR YDSVSVFNGAVSDDSR	1	1	2	1	4
PCOLCE	Procollagen C-endopeptidase enhancer 1	PCOC1_HUMAN	50Step_Domain_p300.0_to_350.0	300	350	50.0 AA STEP	50	0	7	0	0	1	0.04	1	2	0	EPGEGLAVTVSLIGAYK	EPGEGLAVTVSLIGAYK TEESPSAPDAPTCPK	0	3	0	0	2
PCOLCE2	Procollagen C-endopeptidase enhancer 2	PCOC2_HUMAN	50Step_Domain_p350.0_to_400.0	350	400	50.0 AA STEP	50	18	22	22	23	26	-0.06	0.234	21	24	EGNLAIQQAGK GLNYIIMGQVGEDGR GLNYIIMGQVGEDGR EGNLAIQQAGK GLNYIIMGQVGEDGR	EGNLAIQQAGK GLNYIIMGQVGEDGR GLNYIIMGQVGEDGR	14	26	25	21	24
PCOLCE2	Procollagen C-endopeptidase enhancer 2	PCOC2_HUMAN	50Step_Domain_p50.0_to_100.0	50	100	50.0 AA STEP	50	15	6	12	7	5	0.1	0.0432	11	6	FIDLESDNLCR FIDLESDNLCR FIDLESDNLCR	FIDLESDNLCR FIDLESDNLCR	12	7	13	6	5
PCOLCE2	Procollagen C-endopeptidase enhancer 2	PCOC2_HUMAN	50Step_Domain_p200.0_to_250.0	200	250	50.0 AA STEP	50	3	1	2	7	5	-0.08	0.1863	2	6	YDYVAVFNGGEVNDAR YDYVAVFNGGEVNDAR YDYVAVFNGGEVNDAR	YDYVAVFNGGEVNDAR YDYVAVFNGGEVNDAR	2	1	2	6	5
PCOLCE2	Procollagen C-endopeptidase enhancer 2	PCOC2_HUMAN	50Step_Domain_p300.0_to_350.0	300	350	50.0 AA STEP	50	3	8	2	2	0	0.06	0.4536	4	1	DGSLHATVSIINIYK EGNLAIQQAGK DGSLHATVSIINIYK TGTLEGNYCSSDFVLAGTVITTITR DGSLHATVSIINIYK EGNLAIQQAGK	EGNLAIQQAGK	2	10	2	2	0
PDGFRL	Platelet-derived growth factor receptor-like protein	PGFRL_HUMAN	50Step_Domain_p150.0_to_200.0	150	200	50.0 AA STEP	50	4	3	0	8	6	-0.1	0.0072	2	7	GELFVPSPSYFDVVYLNPDR TGSTYIFFTEK GELFVPSPSYFDVVYLNPDR TGSTYIFFTEK	GELFVPSPSYFDVVYLNPDR TGSTYIFFTEK GELFVPSPSYFDVVYLNPDR TGSTYIFFTEK	4	4	0	6	10
PDGFRL	Platelet-derived growth factor receptor-like protein	PGFRL_HUMAN	50Step_Domain_p300.0_to_350.0	300	350	50.0 AA STEP	50	4	3	3	1	3	0.02	1	3	2	DERPVTIQDTWR DERPVTIQDTWR DERPVTIQDTWR	DERPVTIQDTWR DERPVTIQDTWR	4	4	1	1	5
PDGFRL	Platelet-derived growth factor receptor-like protein	PGFRL_HUMAN	50Step_Domain_p100.0_to_150.0	100	150	50.0 AA STEP	50	2	2	8	1	2	0.04	0.432	4	2	IGWSYPAYLDTFK IGWSYPAYLDTFK IGWSYPAYLDTFK	IGWSYPAYLDTFK IGWSYPAYLDTFK	2	3	3	1	3
PDIA4	Protein disulfide-isomerase A4	PDIA4_HUMAN	50Step_Domain_p450.0_to_500.0	450	500	50.0 AA STEP	50	0	0	1	1	3	-0.04	0.0247	0	2	FAMEPEEFDSDTLR	FAMEPEEFDSDTLR DLGLSESGEDVNAAILDESGK FAMEPEEFDSDTLR	0	0	2	1	2
PDIA4	Protein disulfide-isomerase A4	PDIA4_HUMAN	50Step_Domain_p200.0_to_250.0	200	250	50.0 AA STEP	50	0	2	1	2	0	0	1	1	1	VDATAETDLAK VDATAETDLAK	FDVSGYPTLK VDATAETDLAK	0	1	1	2	0
PDIA4	Protein disulfide-isomerase A4	PDIA4_HUMAN	50Step_Domain_p550.0_to_600.0	550	600	50.0 AA STEP	50	0	0	1	1	0	0	1	0	0	MDATANDVPSDR	MDATANDVPSDR	0	0	1	1	0
PKM	Pyruvate kinase PKM	KPYM_HUMAN	50Step_Domain_p100.0_to_150.0	100	150	50.0 AA STEP	50	3	4	3	7	5	-0.06	0.4664	3	6	ITLDNAYMEK ITLDNAYMEK TATESFASDPILYRPVAVALDTK ITLDNAYMEK	GSGTAEVELK ITLDNAYMEK GSGTAEVELK ITLDNAYMEK	1	5	2	11	6
PKM	Pyruvate kinase PKM	KPYM_HUMAN	50Step_Domain_p250.0_to_300.0	250	300	50.0 AA STEP	50	6	3	6	5	5	0	1	5	5	GDLGIEIPAEK RFDEILEASDGIMVAR GDLGIEIPAEK RFDEILEASDGIMVAR FDEILEASDGIMVAR GDLGIEIPAEK	FDEILEASDGIMVAR GDLGIEIPAEK RFDEILEASDGIMVAR FDEILEASDGIMVAR GDLGIEIPAEK	2	4	4	9	6
PKM	Pyruvate kinase PKM	KPYM_HUMAN	50Step_Domain_p150.0_to_200.0	150	200	50.0 AA STEP	50	6	4	3	5	5	-0.02	1	4	5	ITLDNAYMEK IYVDDGLISLQVK GADFLVTEVENGGSLGSK ITLDNAYMEK IYVDDGLISLQVK ITLDNAYMEK	GADFLVTEVENGGSLGSK ITLDNAYMEK IYVDDGLISLQVK GADFLVTEVENGGSLGSK ITLDNAYMEK IYVDDGLISLQVK	2	6	2	8	6
PKM	Pyruvate kinase PKM	KPYM_HUMAN	50Step_Domain_p400.0_to_450.0	400	450	50.0 AA STEP	50	3	4	6	4	5	0	1	4	4	APIIAVTR LAPITSDPTEATAVGAVEASFK APIIAVTR LAPITSDPTEATAVGAVEASFK	APIIAVTR LAPITSDPTEATAVGAVEASFK APIIAVTR LAPITSDPTEATAVGAVEASFK	1	5	4	7	6
PKM	Pyruvate kinase PKM	KPYM_HUMAN	50Step_Domain_p200.0_to_250.0	200	250	50.0 AA STEP	50	3	5	3	3	3	0.02	1	4	3	GVNLPGAAVDLPAVSEK FGVEQDVDMVFASFIR GADFLVTEVENGGSLGSK GVNLPGAAVDLPAVSEK GVNLPGAAVDLPAVSEK	GADFLVTEVENGGSLGSK GVNLPGAAVDLPAVSEK GADFLVTEVENGGSLGSK GVNLPGAAVDLPAVSEK	1	7	2	5	3
PKM	Pyruvate kinase PKM	KPYM_HUMAN	50Step_Domain_p300.0_to_350.0	300	350	50.0 AA STEP	50	3	1	4	2	4	0	1	3	3	GDLGIEIPAEK GDLGIEIPAEK GDLGIEIPAEK	GDLGIEIPAEK GDLGIEIPAEK	1	2	3	4	5
PKM	Pyruvate kinase PKM	KPYM_HUMAN	50Step_Domain_p0_to_50	0	50	50.0 AA STEP	50	3	1	1	3	3	-0.02	1	2	3	LDIDSPPITAR LDIDSPPITAR LDIDSPPITAR	LDIDSPPITAR LDIDSPPITAR	1	1	1	5	4
PKM	Pyruvate kinase PKM	KPYM_HUMAN	50Step_Domain_p450.0_to_500.0	450	500	50.0 AA STEP	50	8	3	7	2	2	0.08	0.0363	6	2	APIIAVTR DPVQEAWAEDVDLR DPVQEAWAEDVDLR VNFAMNVGK APIIAVTR DPVQEAWAEDVDLR VNFAMNVGK	APIIAVTR DPVQEAWAEDVDLR APIIAVTR DPVQEAWAEDVDLR	3	4	5	4	2
PKM	Pyruvate kinase PKM	KPYM_HUMAN	50Step_Domain_p350.0_to_400.0	350	400	50.0 AA STEP	50	0	4	0	0	2	0	1	1	1	EAEAAIYHLQLFEELR GDYPLEAVR	GDYPLEAVR	0	6	0	0	2
PLEC	Plectin	PLEC_HUMAN	50Step_Domain_p2350.0_to_2400.0	2350	2400	50.0 AA STEP	50	0	1	0	1	0	0	1	0	0	SQVEEELFSVR	SQVEEELFSVR	0	1	0	1	0
PLOD1	Procollagen-lysine;2-oxoglutarate 5-dioxygenase 1	PLOD1_HUMAN	50Step_Domain_p400.0_to_450.0	400	450	50.0 AA STEP	50	4	2	3	4	10	-0.08	0.0135	3	7	SEDYVDIVQGR SEDYVDIVQGR SEDYVDIVQGR	SEDYVDIVQGR SEDYVDIVQGR	4	3	2	2	5
PLOD1	Procollagen-lysine;2-oxoglutarate 5-dioxygenase 1	PLOD1_HUMAN	50Step_Domain_p600.0_to_650.0	600	650	50.0 AA STEP	50	4	3	4	6	2	0	1	4	4	FLLEYIAPMTEK AQFDLAFVVR FLLEYIAPMTEK IQGGYENVPTIDIHMNQIGFER AQFDLAFVVR FLLEYIAPMTEK	FLLEYIAPMTEK LYPGYYTR FLLEYIAPMTEK	4	5	3	3	1
PLOD1	Procollagen-lysine;2-oxoglutarate 5-dioxygenase 1	PLOD1_HUMAN	50Step_Domain_p200.0_to_250.0	200	250	50.0 AA STEP	50	1	3	3	2	4	-0.02	1	2	3	IFQNLDGALDEVVLK IFQNLDGALDEVVLK LQLNYLGNYIPR IFQNLDGALDEVVLK	IFQNLDGALDEVVLK IFQNLDGALDEVVLK	1	5	2	1	2
PLOD1	Procollagen-lysine;2-oxoglutarate 5-dioxygenase 1	PLOD1_HUMAN	50Step_Domain_p150.0_to_200.0	150	200	50.0 AA STEP	50	5	1	1	2	0	0.02	1	2	1	FLGSGGFIGYAPNLSK LVAEWEGQDSDSDQLFYTK FLGSGGFIGYAPNLSK LVAEWEGQDSDSDQLFYTK	LVAEWEGQDSDSDQLFYTK	6	1	1	1	0
PLOD1	Procollagen-lysine;2-oxoglutarate 5-dioxygenase 1	PLOD1_HUMAN	50Step_Domain_p300.0_to_350.0	300	350	50.0 AA STEP	50	1	2	4	0	2	0.02	1	2	1	AQVEEFLAQHGSEYQSVK AQVEEFLAQHGSEYQSVK AQVEEFLAQHGSEYQSVK	AQVEEFLAQHGSEYQSVK	1	3	3	0	1
PLOD1	Procollagen-lysine;2-oxoglutarate 5-dioxygenase 1	PLOD1_HUMAN	50Step_Domain_p100.0_to_150.0	100	150	50.0 AA STEP	50	2	2	1	2	0	0.02	1	2	1	SQVVFSAEELIYPDR SQVVFSAEELIYPDR SQVVFSAEELIYPDR	SQVVFSAEELIYPDR	2	3	1	1	0
PLOD1	Procollagen-lysine;2-oxoglutarate 5-dioxygenase 1	PLOD1_HUMAN	50Step_Domain_p450.0_to_500.0	450	500	50.0 AA STEP	50	1	4	0	2	0	0.02	1	2	1	QQDVFMFLTNR GELQSSDLFHHSK HTLGHLLSLDSYR QQDVFMFLTNR	QQDVFMFLTNR	1	6	0	1	0
PLTP	Phospholipid transfer protein	PLTP_HUMAN	50Step_Domain_p250.0_to_300.0	250	300	50.0 AA STEP	50	6	5	0	14	6	-0.12	0.032	4	10	AGALQLLLVGDK AVEPQLQEEER AGALQLLLVGDK AVEPQLQEEER VPHDLDMLLR	AGALQLLLVGDK AVEPQLQEEER AVEPQLQEEER	5	9	0	3	2
PLTP	Phospholipid transfer protein	PLTP_HUMAN	50Step_Domain_p0_to_50	0	50	50.0 AA STEP	50	4	4	0	5	6	-0.06	1	3	6	FLEQELETITIPDLR FLEQELETITIPDLR	FLEQELETITIPDLR FLEQELETITIPDLR	3	7	0	1	2
PLTP	Phospholipid transfer protein	PLTP_HUMAN	50Step_Domain_p50.0_to_100.0	50	100	50.0 AA STEP	50	4	4	0	5	6	-0.06	1	3	6	FLEQELETITIPDLR FLEQELETITIPDLR	FLEQELETITIPDLR FLEQELETITIPDLR	3	7	0	1	2
PLTP	Phospholipid transfer protein	PLTP_HUMAN	50Step_Domain_p200.0_to_250.0	200	250	50.0 AA STEP	50	5	8	0	0	6	0.02	1	4	3	DPVASTSNLDMDFR GAFFPLTER DPVASTSNLDMDFR GAFFPLTER SSVDELVGIDYSLMK SSVDELVGIDYSLMKDPVASTSNLDMDFR	DPVASTSNLDMDFR GAFFPLTER	4	15	0	0	2
PLXDC2	Plexin domain-containing protein 2	PXDC2_HUMAN	50Step_Domain_p100.0_to_150.0	100	150	50.0 AA STEP	50	1	1	0	0	1	0.02	1	1	0	DLWVNIDQMEK DLWVNIDQMEK	DLWVNIDQMEK	1	1	0	0	1
PPIA	Peptidyl-prolyl cis-trans isomerase A	PPIA_HUMAN	50Step_Domain_p100.0_to_150.0	100	150	50.0 AA STEP	50	0	2	3	2	3	0	1	2	2	EGMNIVEAMER EGMNIVEAMER	EGMNIVEAMER EGMNIVEAMER	0	3	2	3	2
PPIA	Peptidyl-prolyl cis-trans isomerase A	PPIA_HUMAN	50Step_Domain_p50.0_to_100.0	50	100	50.0 AA STEP	50	3	1	0	2	3	-0.02	0.8648	1	2	FEDENFILK FEDENFILK	FEDENFILK FEDENFILK	1	2	0	3	2
PPIA	Peptidyl-prolyl cis-trans isomerase A	PPIA_HUMAN	50Step_Domain_p0_to_50	0	50	50.0 AA STEP	50	3	2	3	1	0	0.06	0.1284	3	0	VSFELFADK VSFELFADK VSFELFADKVPK VSFELFADK	VSFELFADK	1	4	2	1	0
PRELP	Prolargin	PRELP_HUMAN	50Step_Domain_p200.0_to_250.0	200	250	50.0 AA STEP	50	102	126	183	140	95	0.38	1	137	118	LENLLLLDLQHNR LSDGVFKPDTFHGLK NLMQLNLAHNILR VPTAIHQLYLDSNK LENLLLLDLQHNR LSDGVFKPDTFHGLK NLMQLNLAHNILR VPTAIHQLYLDSNK LENLLLLDLQHNR LSDGVFKPDTFHGLK NLMQLNLAHNILR VPTAIHQLYLDSNK	LENLLLLDLQHNR LSDGVFKPDTFHGLK NLMQLNLAHNILR VPTAIHQLYLDSNK NLMQLNLAHNILR VPTAIHQLYLDSNK	55	71	268	175	85
PRELP	Prolargin	PRELP_HUMAN	50Step_Domain_p250.0_to_300.0	250	300	50.0 AA STEP	50	61	43	27	63	93	-0.68	0.3128	44	78	IETIPNGYFK SFPNLAFIR VPTAIHQLYLDSNK SFPNLAFIR VPTAIHQLYLDSNK IETIPNGYFK SFPNLAFIR VPTAIHQLYLDSNK	IETIPNGYFK LNYNKLTDR SFPNLAFIR VPTAIHQLYLDSNK IETIPNGYFK SFPNLAFIR VPTAIHQLYLDSNK	33	24	40	79	83
PRELP	Prolargin	PRELP_HUMAN	50Step_Domain_p150.0_to_200.0	150	200	50.0 AA STEP	50	65	90	66	47	63	0.38	1	74	55	IPPGVFSK LENLLLLDLQHNR LPGLVFLYMEK NQLEEVPSALPR IPPGVFSK LENLLLLDLQHNR LPGLVFLYMEK NQLEEVPSALPR IPPGVFSK LENLLLLDLQHNR LPGLVFLYMEK NQLEEVPSALPR	IPPGVFSK LENLLLLDLQHNR LPGLVFLYMEK NQLEEVPSALPR IPPGVFSK LPGLVFLYMEK LSQNHISR NQLEEVPSALPR	35	51	96	59	56
PRELP	Prolargin	PRELP_HUMAN	50Step_Domain_p300.0_to_350.0	300	350	50.0 AA STEP	50	39	34	16	32	46	-0.18	1	30	39	ISSVPAINNR LEHLYLNNNSIEK INGTQICPNDLVAFHDFSSDLENVPHLR ISSVPAINNR LEHLYLNNNSIEK ISSVPAINNR LEHLYLNNNSIEK	ISSVPAINNR LEHLYLNNNSIEK ISSVPAINNR LEHLYLNNNSIEK	21	19	23	40	41
PRELP	Prolargin	PRELP_HUMAN	50Step_Domain_p100.0_to_150.0	100	150	50.0 AA STEP	50	39	25	9	15	27	0.06	1	24	21	KVPVIPPR LPGLVFLYMEK WINLDNNR LPGLVFLYMEK WINLDNNR KVPVIPPR LPGLVFLYMEK WINLDNNR	LPGLVFLYMEK WINLDNNR LPGLVFLYMEK WINLDNNR	21	14	13	19	24
PRG4	Proteoglycan 4	PRG4_HUMAN	50Step_Domain_p1150.0_to_1200.0	1150	1200	50.0 AA STEP	50	29	47	30	28	69	-0.26	0.116	35	48	GHYFWMLSPFSPPSPAR ITEVWGIPSPIDTVFTR VPNQGIIINPMLSDETNICNGKPVDGLTTLR GHYFWMLSPFSPPSPAR ITEVWGIPSPIDTVFTR RITEVWGIPSPIDTVFTR VPNQGIIINPMLSDETNICNGKPVDGLTTLR ITEVWGIPSPIDTVFTR VPNQGIIINPMLSDETNICNGKPVDGLTTLR	ITEVWGIPSPIDTVFTR VPNQGIIINPMLSDETNICNGKPVDGLTTLR GHYFWMLSPFSPPSPAR ITEVWGIPSPIDTVFTR	32	48	53	7	23
PRG4	Proteoglycan 4	PRG4_HUMAN	50Step_Domain_p1350.0_to_1400.0	1350	1400	50.0 AA STEP	50	77	61	70	52	24	0.62	0	69	38	DQYYNIDVPSR GLPNVVTSAISLPNIR KPDGYDYYAFSK DQYYNIDVPSR GLPNVVTSAISLPNIR KPDGYDYYAFSK DQYYNIDVPSR GLPNVVTSAISLPNIR KPDGYDYYAFSK	DQYYNIDVPSR GLPNVVTSAISLPNIR KPDGYDYYAFSK DQYYNIDVPSR GLPNVVTSAISLPNIR KPDGYDYYAFSK	86	62	123	13	8
PRG4	Proteoglycan 4	PRG4_HUMAN	50Step_Domain_p1200.0_to_1250.0	1200	1250	50.0 AA STEP	50	29	33	29	36	21	0.04	1	30	28	DAGYPKPIFK GFGGLTGQIVAALSTAK ITEVWGIPSPIDTVFTR DAGYPKPIFK FTNDIKDAGYPKPIFK GFGGLTGQIVAALSTAK ITEVWGIPSPIDTVFTR RITEVWGIPSPIDTVFTR DAGYPKPIFK GFGGLTGQIVAALSTAK ITEVWGIPSPIDTVFTR	DAGYPKPIFK ITEVWGIPSPIDTVFTR DAGYPKPIFK ITEVWGIPSPIDTVFTR	32	33	51	9	7
PRG4	Proteoglycan 4	PRG4_HUMAN	50Step_Domain_p100.0_to_150.0	100	150	50.0 AA STEP	50	4	2	10	28	18	-0.36	0.0029	5	23	VIESEEITEEHSVSENQESSSSSSSSSSSSTIR VIESEEITEEHSVSENQESSSSSSSSSSSSTIR KVIESEEITEEHSVSENQESSSSSSSSSSSSTIR VIESEEITEEHSVSENQESSSSSSSSSSSSTIR	VIESEEITEEHSVSENQESSSSSSSSSSSSTIR VIESEEITEEHSVSENQESSSSSSSSSSSSTIR	4	2	18	7	6
PRG4	Proteoglycan 4	PRG4_HUMAN	50Step_Domain_p150.0_to_200.0	150	200	50.0 AA STEP	50	4	2	10	28	18	-0.36	0.0029	5	23	VIESEEITEEHSVSENQESSSSSSSSSSSSTIR VIESEEITEEHSVSENQESSSSSSSSSSSSTIR KVIESEEITEEHSVSENQESSSSSSSSSSSSTIR VIESEEITEEHSVSENQESSSSSSSSSSSSTIR	VIESEEITEEHSVSENQESSSSSSSSSSSSTIR VIESEEITEEHSVSENQESSSSSSSSSSSSTIR	4	2	18	7	6
PRG4	Proteoglycan 4	PRG4_HUMAN	50Step_Domain_p650.0_to_700.0	650	700	50.0 AA STEP	50	0	0	2	16	12	-0.26	0.1044	1	14	EPAPTTPK EPAPTTPK EPAPTTPK EPAPTTPK	EPAPTTPK EPAPTTPK EPAPTTPK EPAPTTPK EPAPTTPK EPAPTTPK EPAPTTPK EPAPTTPK	0	0	4	4	4
PRG4	Proteoglycan 4	PRG4_HUMAN	50Step_Domain_p1250.0_to_1300.0	1250	1300	50.0 AA STEP	50	13	17	13	16	9	0.04	1	14	12	GFGGLTGQIVAALSTAK GGSIQQYIYK NWPESVYFFK RPALNYPVYGETTQVR GFGGLTGQIVAALSTAK GGSIQQYIYK RGGSIQQYIYK RPALNYPVYGETTQVR YKNWPESVYFFK GFGGLTGQIVAALSTAK GGSIQQYIYK NWPESVYFFK RPALNYPVYGETTQVR	GGSIQQYIYK RPALNYPVYGETTQVR GGSIQQYIYK	14	17	22	4	3
PRG4	Proteoglycan 4	PRG4_HUMAN	50Step_Domain_p450.0_to_500.0	450	500	50.0 AA STEP	50	0	0	2	12	12	-0.22	0.3683	1	12	EPAPTTPK EPAPTTPK EPAPTTPK	EPAPTTPK EPAPTTPK EPAPTTPK EPAPTAPK EPAPTTPK EPAPTTPK EPAPTTPK	0	0	3	3	4
PRG4	Proteoglycan 4	PRG4_HUMAN	50Step_Domain_p400.0_to_450.0	400	450	50.0 AA STEP	50	0	0	2	12	9	-0.18	0.8642	1	10	EPAPTTPK EPAPTTPK EPAPTTPK	EPAPTTPK EPAPTTPK EPAPTTPK EPAPTTPK EPAPTTPK EPAPTTPK	0	0	3	3	3
PRG4	Proteoglycan 4	PRG4_HUMAN	50Step_Domain_p550.0_to_600.0	550	600	50.0 AA STEP	50	0	0	2	12	9	-0.18	0.8642	1	10	EPAPTTPK EPAPTTPK EPAPTTPK	EPAPTTPK EPAPTTPK EPAPTTPK EPAPTTPK EPAPTTPK EPAPTTPK	0	0	3	3	3
PRG4	Proteoglycan 4	PRG4_HUMAN	50Step_Domain_p750.0_to_800.0	750	800	50.0 AA STEP	50	0	0	2	12	9	-0.18	0.8642	1	10	EPAPTTPK EPAPTTPK EPAPTTPK	EPAPTTPK EPAPTTPK EPAPTTPK EPAPTTPK EPAPTTPK EPAPTTPK	0	0	3	3	3
PRG4	Proteoglycan 4	PRG4_HUMAN	50Step_Domain_p700.0_to_750.0	700	750	50.0 AA STEP	50	0	0	1	8	9	-0.16	1	0	8	EPAPTTPK EPAPTTPK	EPAPTTPK EPAPTTPK EPAPTTPK EPAPTTPK ETAPTTPK	0	0	2	2	3
PRG4	Proteoglycan 4	PRG4_HUMAN	50Step_Domain_p1300.0_to_1350.0	1300	1350	50.0 AA STEP	50	13	16	7	4	6	0.14	1	12	5	AIGPSQTHTIR GLPNVVTSAISLPNIR GVLHNEVK AIGPSQTHTIR GLPNVVTSAISLPNIR GVLHNEVK AIGPSQTHTIR GLPNVVTSAISLPNIR	GLPNVVTSAISLPNIR GLPNVVTSAISLPNIR	14	16	12	1	2
PRG4	Proteoglycan 4	PRG4_HUMAN	50Step_Domain_p600.0_to_650.0	600	650	50.0 AA STEP	50	0	0	1	4	6	-0.1	1	0	5	EPAPTTPK	EPAPTTPK EPAPTTPK ETAPTTPK	0	0	1	1	2
PRG4	Proteoglycan 4	PRG4_HUMAN	50Step_Domain_p800.0_to_850.0	800	850	50.0 AA STEP	50	0	0	1	4	6	-0.1	1	0	5	EPAPTTPK	EPAPTTPK EPAPTTPK ETAPTTPK	0	0	1	1	2
PRG4	Proteoglycan 4	PRG4_HUMAN	50Step_Domain_p500.0_to_550.0	500	550	50.0 AA STEP	50	0	0	1	4	3	-0.08	1	0	4	EPAPTTPK	EPAPTTPK EPAPTTPK	0	0	1	1	1
PRG4	Proteoglycan 4	PRG4_HUMAN	50Step_Domain_p250.0_to_300.0	250	300	50.0 AA STEP	50	0	0	1	0	6	-0.06	1	0	3	ETSLTVNK ETSLTVNKETTVETK	ETSLTVNK	0	0	2	0	2
PRG4	Proteoglycan 4	PRG4_HUMAN	50Step_Domain_p1100.0_to_1150.0	1100	1150	50.0 AA STEP	50	9	19	15	4	0	0.24	0.1972	14	2	VPNQGIIINPMLSDETNICNGKPVDGLTTLR SEDAGGAEGETPHMLLRPHVFMPEVTPDMDYLPR VPNQGIIINPMLSDETNICNGKPVDGLTTLR SEDAGGAEGETPHMLLRPHVFMPEVTPDMDYLPR VPNQGIIINPMLSDETNICNGKPVDGLTTLR	VPNQGIIINPMLSDETNICNGKPVDGLTTLR	10	19	26	1	0
PRG4	Proteoglycan 4	PRG4_HUMAN	50Step_Domain_p850.0_to_900.0	850	900	50.0 AA STEP	50	0	0	2	0	3	-0.02	1	1	2	SPDESTPELSAEPTPK	SPDESTPELSAEPTPK	0	0	3	0	1
PROS1	Vitamin K-dependent protein S	PROS_HUMAN	50Step_Domain_p550.0_to_600.0	550	600	50.0 AA STEP	50	4	4	0	5	7	-0.06	0	3	6	IETISHEDLQR NNLELSTPLK SQDILLSVENTVIYR IETISHEDLQR NNLELSTPLK SQDILLSVENTVIYR	IETISHEDLQR IETISHEDLQR NNLELSTPLK	6	8	0	3	3
PROS1	Vitamin K-dependent protein S	PROS_HUMAN	50Step_Domain_p600.0_to_650.0	600	650	50.0 AA STEP	50	1	1	0	5	2	-0.06	0.0028	1	4	IETISHEDLQR IETISHEDLQR	IETISHEDLQR IETISHEDLQR	2	2	0	3	1
PROS1	Vitamin K-dependent protein S	PROS_HUMAN	50Step_Domain_p300.0_to_350.0	300	350	50.0 AA STEP	50	1	0	0	2	0	-0.02	1	0	1	FSAEFDFR	FSAEFDFR	1	0	0	1	0
RAA1	Ribonuclease A A1	W0UV28_HUMAN	50Step_Domain_p50.0_to_100.0	50	100	50.0 AA STEP	50	6	2	4	10	17	-0.2	0.0153	4	14	DINTFIHGNK DINTFIHGNK DINTFIHGNK	DINTFIHGNK SSFQVTTCK DINTFIHGNK	2	2	7	12	23
RAA1	Ribonuclease A A1	W0UV28_HUMAN	50Step_Domain_p100.0_to_147.0	100	147	50.0 AA STEP	47	14	13	13	9	2	0.148936	0.0429	13	6	NVVVACENGLPVHLDQSIFR NVVVACENGLPVHLDQSIFR NVVVACENGLPVHLDQSIFR	NVVVACENGLPVHLDQSIFR SSFQVTTCK NVVVACENGLPVHLDQSIFR	5	11	22	11	3
RAA1	Ribonuclease A A1	W0UV28_HUMAN	50Step_Domain_p0_to_50	0	50	50.0 AA STEP	50	0	5	2	2	0	0.02	1	2	1	YTHFLTQHYDAKPQGR YTHFLTQHYDAKPQGR YTHFLTQHYDAKPQGR	YTHFLTQHYDAKPQGR YTHFLTQHYDAKPQGR	0	4	3	3	0
RCN3	Reticulocalbin-3	RCN3_HUMAN	50Step_Domain_p50.0_to_100.0	50	100	50.0 AA STEP	50	6	7	6	4	4	0.04	0.0042	6	4	AGDGDGWVSLAELR EFDQLTPEESQAR AGDGDGWVSLAELR EFDQLTPEESQAR AGDGDGWVSLAELR EFDQLTPEESQAR	EFDQLTPEESQAR AGDGDGWVSLAELR EFDQLTPEESQAR	2	4	2	3	7
RCN3	Reticulocalbin-3	RCN3_HUMAN	50Step_Domain_p100.0_to_150.0	100	150	50.0 AA STEP	50	3	4	3	3	4	-0.02	1	3	4	AGDGDGWVSLAELR AGDGDGWVSLAELR DSVSAAWDTYDTDRDGR AGDGDGWVSLAELR	DSVSAAWDTYDTDR AGDGDGWVSLAELR DSVSAAWDTYDTDR DSVSAAWDTYDTDRDGR	1	2	1	2	6
RCN3	Reticulocalbin-3	RCN3_HUMAN	50Step_Domain_p200.0_to_250.0	200	250	50.0 AA STEP	50	3	0	3	1	1	0.02	0.6769	2	1	DIVIAETLEDLDR DIVIAETLEDLDR	DIVIAETLEDLDR DIVIAETLEDLDR	1	0	1	1	1
SEMA3C	Semaphorin-3C	SEM3C_HUMAN	50Step_Domain_p50.0_to_100.0	50	100	50.0 AA STEP	50	1	3	6	6	8	-0.08	0.0032	3	7	ILLMDEDQDR ILLMDEDQDR TSEYFSLSHHPLDYR ILLMDEDQDR	ILLMDEDQDR ILLMDEDQDR	1	3	6	6	8
SEMA3C	Semaphorin-3C	SEM3C_HUMAN	50Step_Domain_p400.0_to_450.0	400	450	50.0 AA STEP	50	5	5	5	3	1	0.06	0.024	5	2	EFPDDVVTFIR YHVLFLGTDR EFPDDVVTFIR YHVLFLGTDR EFPDDVVTFIR YHVLFLGTDR	EFPDDVVTFIR EFPDDVVTFIR	5	5	5	3	1
SEMA3C	Semaphorin-3C	SEM3C_HUMAN	50Step_Domain_p350.0_to_400.0	350	400	50.0 AA STEP	50	1	2	2	3	1	0	1	2	2	EFPDDVVTFIR EFPDDVVTFIR EFPDDVVTFIR	EFPDDVVTFIR EFPDDVVTFIR	1	2	2	3	1
SEMA3C	Semaphorin-3C	SEM3C_HUMAN	50Step_Domain_p0_to_50	0	50	50.0 AA STEP	50	2	4	1	0	2	0.02	1	2	1	VYLTFDELR TSEYFSLSHHPLDYR VYLTFDELR VYLTFDELR	VYLTFDELR	2	4	1	0	2
SEMA3C	Semaphorin-3C	SEM3C_HUMAN	50Step_Domain_p100.0_to_150.0	100	150	50.0 AA STEP	50	1	0	0	2	0	-0.02	1	0	1	SEDQVFMIDSK	SEDQVFMIDSK	1	0	0	2	0
SEMA3C	Semaphorin-3C	SEM3C_HUMAN	50Step_Domain_p150.0_to_200.0	150	200	50.0 AA STEP	50	1	0	0	2	0	-0.02	1	0	1	SEDQVFMIDSK	SEDQVFMIDSK	1	0	0	2	0
SEMA3C	Semaphorin-3C	SEM3C_HUMAN	50Step_Domain_p450.0_to_500.0	450	500	50.0 AA STEP	50	6	3	3	0	1	0.08	0.0048	4	0	QQLYVSSNEGVSQVSLHR YHVLFLGTDR YHVLFLGTDR YHVLFLGTDR	QQLYVSSNEGVSQVSLHR	6	3	3	0	1
SEMA3C	Semaphorin-3C	SEM3C_HUMAN	50Step_Domain_p650.0_to_700.0	650	700	50.0 AA STEP	50	1	2	1	0	1	0.02	1	1	0	VLDSEMVAVVTDK VLDSEMVAVVTDK VLDSEMVAVVTDK	VLDSEMVAVVTDK	1	2	1	0	1
SEMA3C	Semaphorin-3C	SEM3C_HUMAN	50Step_Domain_p500.0_to_550.0	500	550	50.0 AA STEP	50	2	0	0	0	1	0.02	1	1	0	QQLYVSSNEGVSQVSLHR	QQLYVSSNEGVSQVSLHR	2	0	0	0	1
SEMA3C	Semaphorin-3C	SEM3C_HUMAN	50Step_Domain_p550.0_to_600.0	550	600	50.0 AA STEP	50	2	0	0	1	0	0.02	1	1	0	NAAEIVQYGVK	NAAEIVQYGVK	2	0	0	1	0
SERPINA1	Alpha-1-antitrypsin	A1AT_HUMAN	50Step_Domain_p350.0_to_400.0	350	400	50.0 AA STEP	50	39	46	52	114	70	-0.92	0.0909	46	92	AVLTIDEK GTEAAGAMFLEAIPMSIPPEVK VFSNGADLSGVTEEAPLK AVLTIDEK FNKPFVFLMIEQNTK GTEAAGAMFLEAIPMSIPPEVK VFSNGADLSGVTEEAPLK AVLTIDEK GTEAAGAMFLEAIPMSIPPEVK VFSNGADLSGVTEEAPLK	AVLTIDEK GTEAAGAMFLEAIPMSIPPEVK VFSNGADLSGVTEEAPLK AVLTIDEK GTEAAGAMFLEAIPMSIPPEVK VFSNGADLSGVTEEAPLK	63	71	32	46	30
SERPINA1	Alpha-1-antitrypsin	A1AT_HUMAN	50Step_Domain_p200.0_to_250.0	200	250	50.0 AA STEP	50	83	68	67	54	117	-0.26	1	73	86	DTEEEDFHVDQVTTVK DTVFALVNYIFFK WERPFEVK WERPFEVKDTEEEDFHVDQVTTVK DTEEEDFHVDQVTTVK DTVFALVNYIFFK ELDRDTVFALVNYIFFK WERPFEVK WERPFEVKDTEEEDFHVDQVTTVK DTEEEDFHVDQVTTVK WERPFEVK	DTEEEDFHVDQVTTVK WERPFEVK DTEEEDFHVDQVTTVK WERPFEVK	132	104	41	22	50
SERPINA1	Alpha-1-antitrypsin	A1AT_HUMAN	50Step_Domain_p150.0_to_200.0	150	200	50.0 AA STEP	50	103	153	80	91	58	0.76	0.3015	112	74	KQINDYVEK LYHSEAFTVNFGDTEEAK LYHSEAFTVNFGDTEEAKK QINDYVEK ELDRDTVFALVNYIFFK LVDKFLEDVKK LYHSEAFTVNFGDTEEAK LYHSEAFTVNFGDTEEAKK LYHSEAFTVNFGDTEEAK LYHSEAFTVNFGDTEEAKK QINDYVEK	KQINDYVEK LYHSEAFTVNFGDTEEAK LYHSEAFTVNFGDTEEAKK QINDYVEK LYHSEAFTVNFGDTEEAK QINDYVEK	165	234	49	37	25
SERPINA1	Alpha-1-antitrypsin	A1AT_HUMAN	50Step_Domain_p300.0_to_350.0	300	350	50.0 AA STEP	50	39	24	43	77	61	-0.68	0.4896	35	69	LSITGTYDLK SASLHLPK SVLGQLGITK VFSNGADLSGVTEEAPLK LSITGTYDLK SASLHLPK SVLGQLGITK VFSNGADLSGVTEEAPLK LSITGTYDLK SASLHLPK SVLGQLGITK VFSNGADLSGVTEEAPLK	LSITGTYDLK SVLGQLGITK VFSNGADLSGVTEEAPLK FLENEDRR LSITGTYDLK SASLHLPK SVLGQLGITK VFSNGADLSGVTEEAPLK	62	37	26	31	26
SERPINA1	Alpha-1-antitrypsin	A1AT_HUMAN	50Step_Domain_p100.0_to_150.0	100	150	50.0 AA STEP	50	39	31	23	20	42	0	1	31	31	TLNQPDSQLQLTTGNGLFLSEGLK ADTHDEILEGLNFNLTEIPEAQIHEGFQELLR LVDKFLEDVKK TLNQPDSQLQLTTGNGLFLSEGLK TLNQPDSQLQLTTGNGLFLSEGLK	TLNQPDSQLQLTTGNGLFLSEGLK TLNQPDSQLQLTTGNGLFLSEGLK	63	48	14	8	18
SERPINA1	Alpha-1-antitrypsin	A1AT_HUMAN	50Step_Domain_p250.0_to_300.0	250	300	50.0 AA STEP	50	48	22	82	5	14	0.82	0.1854	51	10	LQHLENELTHDIITK LSSWVLLMK YLGNATAIFFLPDEGK LQHLENELTHDIITK LSSWVLLMK YLGNATAIFFLPDEGK LQHLENELTHDIITK LSSWVLLMK YLGNATAIFFLPDEGK	LSSWVLLMK FLENEDRR LQHLENELTHDIITK LSSWVLLMK	77	33	50	2	6
SERPINE2	Serpin peptidase inhibitor; clade E (Nexin; plasminogen activator inhibitor type 1); member 2; isoform CRA_b	A0A024R498_HUMAN	50Step_Domain_p150.0_to_200.0	150	200	50.0 AA STEP	50	20	25	35	55	30	-0.3	0.0264	27	42	DMIDNLLSPDLIDGVLTR LVLVNAVYFK NVNFEDPASACDSINAWVK DMIDNLLSPDLIDGVLTR LVLVNAVYFK NVNFEDPASACDSINAWVK DMIDNLLSPDLIDGVLTR LVLVNAVYFK NVNFEDPASACDSINAWVK	DMIDNLLSPDLIDGVLTR LVLVNAVYFK NVNFEDPASACDSINAWVK DMIDNLLSPDLIDGVLTR LVLVNAVYFK NVNFEDPASACDSINAWVK	17	24	40	53	26
SERPINE2	Serpin peptidase inhibitor; clade E (Nexin; plasminogen activator inhibitor type 1); member 2; isoform CRA_b	A0A024R498_HUMAN	50Step_Domain_p300.0_to_350.0	300	350	50.0 AA STEP	50	49	40	43	31	36	0.2	0.324	44	34	FTAVAQTDLK FTAVAQTDLKEPLK SENLHVSHILQK VLGITDMFDSSK FTAVAQTDLK FTAVAQTDLKEPLK SENLHVSHILQK VLGITDMFDSSK FTAVAQTDLK FTAVAQTDLKEPLK SENLHVSHILQK VLGITDMFDSSK	FTAVAQTDLK FTAVAQTDLKEPLK IEVSEDGTK SENLHVSHILQK VLGITDMFDSSK FTAVAQTDLK FTAVAQTDLKEPLK IEVSEDGTK VLGITDMFDSSK	42	38	49	30	31
SERPINE2	Serpin peptidase inhibitor; clade E (Nexin; plasminogen activator inhibitor type 1); member 2; isoform CRA_b	A0A024R498_HUMAN	50Step_Domain_p250.0_to_300.0	250	300	50.0 AA STEP	50	27	31	28	10	24	0.24	0.1936	29	17	FTAVAQTDLK FTAVAQTDLKEPLK TIDSWMSIMVPK FTAVAQTDLK FTAVAQTDLKEPLK TIDSWMSIMVPK FTAVAQTDLK FTAVAQTDLKEPLK TIDSWMSIMVPK	FTAVAQTDLK FTAVAQTDLKEPLK TIDSWMSIMVPK FTAVAQTDLK FTAVAQTDLKEPLK TIDSWMSIMVPK	23	29	32	10	21
SERPINE2	Serpin peptidase inhibitor; clade E (Nexin; plasminogen activator inhibitor type 1); member 2; isoform CRA_b	A0A024R498_HUMAN	50Step_Domain_p100.0_to_150.0	100	150	50.0 AA STEP	50	12	4	10	7	11	0	1	9	9	DIVTVANAVFVK NVNFEDPASACDSINAWVK DIVTVANAVFVK NVNFEDPASACDSINAWVK DIVTVANAVFVK NASEIEVPFVTR NVNFEDPASACDSINAWVK	DIVTVANAVFVK NASEIEVPFVTR NVNFEDPASACDSINAWVK DIVTVANAVFVK NASEIEVPFVTR NVNFEDPASACDSINAWVK	10	4	12	7	10
SERPINE2	Serpin peptidase inhibitor; clade E (Nexin; plasminogen activator inhibitor type 1); member 2; isoform CRA_b	A0A024R498_HUMAN	50Step_Domain_p350.0_to_397.0	350	397	50.0 AA STEP	47	9	12	7	7	10	0.0212766	1	9	8	ASAATTAILIAR HNPTGAVLFMGQINKP ASAATTAILIAR HNPTGAVLFMGQINKP ASAATTAILIAR HNPTGAVLFMGQINKP	ASAATTAILIAR IEVSEDGTK ASAATTAILIAR IEVSEDGTK	8	11	8	7	9
SERPINE2	Serpin peptidase inhibitor; clade E (Nexin; plasminogen activator inhibitor type 1); member 2; isoform CRA_b	A0A024R498_HUMAN	50Step_Domain_p200.0_to_250.0	200	250	50.0 AA STEP	50	2	5	1	1	7	-0.02	1	3	4	SYQVPMLAQLSVFR SYQVPMLAQLSVFR SYQVPMLAQLSVFR	SYQVPMLAQLSVFR SYQVPMLAQLSVFR	2	5	1	1	6
SMOC1	SPARC-related modular calcium-binding protein 1	SMOC1_HUMAN	50Step_Domain_p300.0_to_350.0	300	350	50.0 AA STEP	50	8	7	7	10	10	-0.06	0.4203	7	10	FSEPDPSHTLEER TTEADDPFK TTEADDPFKDR FSEPDPSHTLEER FSEPDPSHTLEER TTEADDPFK TTEADDPFKDR	FSEPDPSHTLEER TTEADDPFK TTEADDPFKDR FSEPDPSHTLEER TTEADDPFK TTEADDPFKDR	8	5	8	11	12
SMOC1	SPARC-related modular calcium-binding protein 1	SMOC1_HUMAN	50Step_Domain_p250.0_to_300.0	250	300	50.0 AA STEP	50	5	0	4	8	7	-0.1	0.0144	3	8	TTEADDPFK TTEADDPFKDR TTEADDPFK TTEADDPFKDR	TTEADDPFK TTEADDPFKDR TTEADDPFK TTEADDPFKDR	5	0	5	8	9
SMOC1	SPARC-related modular calcium-binding protein 1	SMOC1_HUMAN	50Step_Domain_p350.0_to_400.0	350	400	50.0 AA STEP	50	5	11	5	4	2	0.08	0.0378	7	3	FSEPDPSHTLEER VVHWYFSQLDSNSSNDINK FSEPDPSHTLEER VVHWYFSQLDSNSSNDINK FSEPDPSHTLEER VVHWYFSQLDSNSSNDINK	FSEPDPSHTLEER VVHWYFSQLDSNSSNDINK FSEPDPSHTLEER	5	8	6	4	3
SMOC1	SPARC-related modular calcium-binding protein 1	SMOC1_HUMAN	50Step_Domain_p400.0_to_434.0	400	434	50.0 AA STEP	34	2	5	3	3	3	0	1	3	3	VISLPELK VISLPELK VISLPELK	VISLPELK VISLPELK	2	4	3	3	4
SMOC1	SPARC-related modular calcium-binding protein 1	SMOC1_HUMAN	50Step_Domain_p200.0_to_250.0	200	250	50.0 AA STEP	50	3	0	3	2	3	0	1	2	2	QSALEEAQQNPR QSALEEAQQNPR	QSALEEAQQNPR QSALEEAQQNPR	3	0	4	2	4
SMOC2	SPARC-related modular calcium-binding protein 2	SMOC2_HUMAN	50Step_Domain_p300.0_to_350.0	300	350	50.0 AA STEP	50	8	9	5	5	6	0.02	0.2511	7	6	LSEPDPSHTLEER HEFLTSVLDALSTDMVHAASDPSSSSGR LSEPDPSHTLEER LSEPDPSHTLEER	LSEPDPSHTLEER LSEPDPSHTLEER	5	12	4	3	9
SMOC2	SPARC-related modular calcium-binding protein 2	SMOC2_HUMAN	50Step_Domain_p150.0_to_200.0	150	200	50.0 AA STEP	50	3	2	4	7	4	-0.06	0.0342	3	6	YPTLWTEQVK TDDAAAPALETQPQGDEEDIASR YPTLWTEQVK TDDAAAPALETQPQGDEEDIASR	TDDAAAPALETQPQGDEEDIASR YPTLWTEQVK TDDAAAPALETQPQGDEEDIASR YPTLWTEQVK	2	3	3	4	6
SMOC2	SPARC-related modular calcium-binding protein 2	SMOC2_HUMAN	50Step_Domain_p200.0_to_250.0	200	250	50.0 AA STEP	50	3	2	1	5	4	-0.04	0.0342	2	4	YPTLWTEQVK NSVSSCDQEHQSALEEAK YPTLWTEQVK NSVSSCDQEHQSALEEAK	YPTLWTEQVK NSVSSCDQEHQSALEEAK YPTLWTEQVK	2	3	1	3	5
SPP1	Osteopontin	OSTP_HUMAN	50Step_Domain_p200.0_to_250.0	200	250	50.0 AA STEP	50	0	0	1	1	2	-0.04	0.0196	0	2	AIPVAQDLNAPSDWDSR	AIPVAQDLNAPSDWDSR AIPVAQDLNAPSDWDSR	0	0	1	2	4
SPP1	Osteopontin	OSTP_HUMAN	50Step_Domain_p300.0_to_314.0	300	314	50.0 AA STEP	14	0	0	1	1	1	-0.0714286	0.4683	0	1	ISHELDSASSEVN	ISHELDSASSEVN ISHELDSASSEVN	0	0	1	2	2
SPP1	Osteopontin	OSTP_HUMAN	50Step_Domain_p150.0_to_200.0	150	200	50.0 AA STEP	50	0	0	1	1	0	0	1	0	0	GDSVVYGLR	GDSVVYGLR	0	0	1	1	0
SRPX2	Sushi repeat-containing protein SRPX2	SRPX2_HUMAN	50Step_Domain_p200.0_to_250.0	200	250	50.0 AA STEP	50	8	5	5	10	15	-0.12	0.011	6	12	GPEPGSHFPEGEHVIR GPEPGSHFPEGEHVIR VYWDPPLVK GPEPGSHFPEGEHVIR	GPEPGSHFPEGEHVIR GPEPGSHFPEGEHVIR	4	4	8	7	10
SRPX2	Sushi repeat-containing protein SRPX2	SRPX2_HUMAN	50Step_Domain_p350.0_to_400.0	350	400	50.0 AA STEP	50	14	15	19	10	13	0.08	0.179	16	12	EQQLSANIIEELR HVTIIELVGQPPQEVGR LLIISAPDPSNR EQQLSANIIEELR HVTIIELVGQPPQEVGR LLIISAPDPSNR EQQLSANIIEELR HVTIIELVGQPPQEVGR LLIISAPDPSNR	EQQLSANIIEELR LLIISAPDPSNR EQQLSANIIEELR LLIISAPDPSNR	7	13	29	7	9
SRPX2	Sushi repeat-containing protein SRPX2	SRPX2_HUMAN	50Step_Domain_p300.0_to_350.0	300	350	50.0 AA STEP	50	4	5	4	15	7	-0.14	0.008	4	11	INVNVNSAAGLLDQFYEK LLIISAPDPSNR INVNVNSAAGLLDQFYEK LLIISAPDPSNR INVNVNSAAGLLDQFYEK LLIISAPDPSNR	INVNVNSAAGLLDQFYEK LLIISAPDPSNR LLIISAPDPSNR	2	4	6	10	5
SRPX2	Sushi repeat-containing protein SRPX2	SRPX2_HUMAN	50Step_Domain_p400.0_to_450.0	400	450	50.0 AA STEP	50	14	11	5	4	7	0.08	0.179	10	6	EQQLSANIIEELR SYFNMVLIDK EQQLSANIIEELR SYFNMVLIDK EQQLSANIIEELR SYFNMVLIDK	EQQLSANIIEELR SYFNMVLIDK EQQLSANIIEELR SYFNMVLIDK	7	9	7	3	5
THBS1	Thrombospondin-1	TSP1_HUMAN	50Step_Domain_p200.0_to_250.0	200	250	50.0 AA STEP	50	3	1	1	4	6	-0.06	0.0048	2	5	FVFGTTPEDILR GGVNDNFQGVLQNVR FVFGTTPEDILR FVFGTTPEDILR	FVFGTTPEDILR GGVNDNFQGVLQNVR FVFGTTPEDILR	4	1	1	3	7
THBS1	Thrombospondin-1	TSP1_HUMAN	50Step_Domain_p50.0_to_100.0	50	100	50.0 AA STEP	50	2	2	3	5	1	-0.02	1	2	3	FQDLVDAVR IEDANLIPPVPDDKFQDLVDAVR FQDLVDAVR IEDANLIPPVPDDKFQDLVDAVR IEDANLIPPVPDDK IEDANLIPPVPDDKFQDLVDAVR	FQDLVDAVR GPDPSSPAFR IEDANLIPPVPDDK FQDLVDAVR	2	3	4	4	1
THBS1	Thrombospondin-1	TSP1_HUMAN	50Step_Domain_p150.0_to_200.0	150	200	50.0 AA STEP	50	0	7	2	2	3	0.02	1	3	2	MENAELDVPIQSVFTR QHVVSVEEALLATGQWK SITLFVQEDR SITLFVQEDR	MENAELDVPIQSVFTR MENAELDVPIQSVFTR SITLFVQEDR	0	8	2	2	4
THBS1	Thrombospondin-1	TSP1_HUMAN	50Step_Domain_p250.0_to_300.0	250	300	50.0 AA STEP	50	2	1	1	2	2	-0.02	1	1	2	TIVTTLQDSIR TIVTTLQDSIR TIVTTLQDSIR	TIVTTLQDSIR TIVTTLQDSIR	2	1	1	2	2
THBS1	Thrombospondin-1	TSP1_HUMAN	50Step_Domain_p100.0_to_150.0	100	150	50.0 AA STEP	50	2	5	1	0	3	0.02	1	3	2	AGTLDLSLTVQGK GTLLALER AGTLDLSLTVQGK GTLLALER QHVVSVEEALLATGQWK GTLLALER	AGTLDLSLTVQGK GTLLALER	3	6	1	0	4
THBS1	Thrombospondin-1	TSP1_HUMAN	50Step_Domain_p1050.0_to_1100.0	1050	1100	50.0 AA STEP	50	3	1	2	1	2	0	1	2	2	AQGYSGLSVK NALWHTGNTPGQVR QVTQSYWDTNPTR NALWHTGNTPGQVR NALWHTGNTPGQVR QVTQSYWDTNPTR	NALWHTGNTPGQVR NALWHTGNTPGQVR	4	1	2	1	2
THBS1	Thrombospondin-1	TSP1_HUMAN	50Step_Domain_p950.0_to_1000.0	950	1000	50.0 AA STEP	50	2	1	2	1	1	0.02	1	2	1	GTSQNDPNWVVR FQMIPLDPK FQMIPLDPK GTSQNDPNWVVR	GTSQNDPNWVVR GTSQNDPNWVVR	2	1	3	1	1
THBS1	Thrombospondin-1	TSP1_HUMAN	50Step_Domain_p1100.0_to_1150.0	1100	1150	50.0 AA STEP	50	2	1	2	1	0	0.04	1	2	0	IMADSGPIYDK IMADSGPIYDK IMADSGPIYDK	IMADSGPIYDK	3	1	2	1	0
THBS2	Thrombospondin-2	TSP2_HUMAN	50Step_Domain_p900.0_to_950.0	900	950	50.0 AA STEP	50	2	0	3	6	3	-0.04	0.0048	2	4	LVFNPDQEDLDGDGR DDFDNDNIPDIDDVCPENNAISETDFR LVFNPDQEDLDGDGR	DDFDNDNIPDIDDVCPENNAISETDFR LVFNPDQEDLDGDGR LVFNPDQEDLDGDGR	3	0	2	3	2
THBS2	Thrombospondin-2	TSP2_HUMAN	50Step_Domain_p1050.0_to_1100.0	1050	1100	50.0 AA STEP	50	1	2	3	2	2	0	1	2	2	AYGYSGVSLK QVTQTYWEDQPTR AYGYSGVSLK QVTQTYWEDQPTR AYGYSGVSLK QVTQTYWEDQPTR	QVTQTYWEDQPTR QVTQTYWEDQPTR	2	3	2	1	1
THBS2	Thrombospondin-2	TSP2_HUMAN	50Step_Domain_p1000.0_to_1050.0	1000	1050	50.0 AA STEP	50	1	1	2	2	2	-0.02	1	1	2	QVTQTYWEDQPTR QVTQTYWEDQPTR QVTQTYWEDQPTR	QVTQTYWEDQPTR QVTQTYWEDQPTR	1	1	1	1	1
THBS2	Thrombospondin-2	TSP2_HUMAN	50Step_Domain_p50.0_to_100.0	50	100	50.0 AA STEP	50	1	3	3	0	2	0.02	1	2	1	GTLLALEGPGLSQR EGFFLTAQLK GTLLALEGPGLSQR GPDPGVPAYR	GPDPGVPAYR	2	4	2	0	1
THBS2	Thrombospondin-2	TSP2_HUMAN	50Step_Domain_p0_to_50	0	50	50.0 AA STEP	50	0	0	3	0	2	0	1	1	1	GPDPGVPAYR	GPDPGVPAYR	0	0	2	0	1
THBS2	Thrombospondin-2	TSP2_HUMAN	50Step_Domain_p950.0_to_1000.0	950	1000	50.0 AA STEP	50	1	0	2	2	0	0	1	1	1	GTTQIDPNWVIR DDFDNDNIPDIDDVCPENNAISETDFR	DDFDNDNIPDIDDVCPENNAISETDFR	1	0	1	1	0
THBS2	Thrombospondin-2	TSP2_HUMAN	50Step_Domain_p600.0_to_650.0	600	650	50.0 AA STEP	50	1	0	0	2	0	-0.02	1	0	1	GNQPVGVGLEAAK	GNQPVGVGLEAAK	1	0	0	1	0
THBS4	Thrombospondin-4	TSP4_HUMAN	50Step_Domain_p150.0_to_200.0	150	200	50.0 AA STEP	50	0	3	2	11	6	-0.12	0	2	8	KPQDFLEELK KPQDFLEELK	AFAGPSQKPETIELR KPQDFLEELK KPQDFLEELK	0	2	1	21	3
THBS4	Thrombospondin-4	TSP4_HUMAN	50Step_Domain_p800.0_to_850.0	800	850	50.0 AA STEP	50	0	3	7	1	4	0.02	1	3	2	QTEQTYWQATPFR QTEQTYWQATPFR	QTEQTYWQATPFR QTEQTYWQATPFR	0	2	3	1	2
THBS4	Thrombospondin-4	TSP4_HUMAN	50Step_Domain_p50.0_to_100.0	50	100	50.0 AA STEP	50	0	3	2	1	2	0	1	2	2	LNPGALLPVLTDPALNDLYVISTFK YFEFTVMGR YFEFTVMGR	LNPGALLPVLTDPALNDLYVISTFK SSATIFGLYSSTDNSK SSATIFGLYSSTDNSK	0	2	1	2	1
THBS4	Thrombospondin-4	TSP4_HUMAN	50Step_Domain_p0_to_50	0	50	50.0 AA STEP	50	0	2	0	1	0	0.02	1	1	0	LNPGALLPVLTDPALNDLYVISTFK	LNPGALLPVLTDPALNDLYVISTFK	0	1	0	1	0
TKT	Transketolase	TKT_HUMAN	50Step_Domain_p250.0_to_300.0	250	300	50.0 AA STEP	50	0	2	0	2	2	-0.02	0.0832	1	2	ILATPPQEDAPSVDIANIR	ILATPPQEDAPSVDIANIR ILATPPQEDAPSVDIANIR	0	2	0	2	3
TKT	Transketolase	TKT_HUMAN	50Step_Domain_p300.0_to_350.0	300	350	50.0 AA STEP	50	0	2	0	2	2	-0.02	0.0832	1	2	ILATPPQEDAPSVDIANIR	ILATPPQEDAPSVDIANIR IIALDGDTK ILATPPQEDAPSVDIANIR	0	2	0	2	4
TKT	Transketolase	TKT_HUMAN	50Step_Domain_p150.0_to_200.0	150	200	50.0 AA STEP	50	0	1	0	1	0	0	1	0	0	LDNLVAILDINR	LGQSDPAPLQHQMDIYQK	0	1	0	1	0
TKT	Transketolase	TKT_HUMAN	50Step_Domain_p400.0_to_450.0	400	450	50.0 AA STEP	50	1	0	0	0	1	0	1	0	0	SVPTSTVFYPSDGVATEK	SVPTSTVFYPSDGVATEK	1	0	0	0	1
TKT	Transketolase	TKT_HUMAN	50Step_Domain_p450.0_to_500.0	450	500	50.0 AA STEP	50	1	0	0	0	1	0	1	0	0	SVPTSTVFYPSDGVATEK	SVPTSTVFYPSDGVATEK	1	0	0	0	1
TNC	Tenascin	TENA_HUMAN	50Step_Domain_p650.0_to_700.0	650	700	50.0 AA STEP	50	4	14	7	11	22	-0.16	0	8	16	VFAILENK VPGDQTSTIIQELEPGVEYFIR VFAILENK VPGDQTSTIIQELEPGVEYFIR VTEYLVVYTPTHEGGLEMQFR VFAILENK VPGDQTSTIIQELEPGVEYFIR	VFAILENK VPGDQTSTIIQELEPGVEYFIR VFAILENK VPGDQTSTIIQELEPGVEYFIR	2	8	4	17	32
TNC	Tenascin	TENA_HUMAN	50Step_Domain_p1950.0_to_2000.0	1950	2000	50.0 AA STEP	50	4	4	5	12	8	-0.12	0.0945	4	10	EVIVGPDTTSYSLADLSPSTHYTAK EVIVGPDTTSYSLADLSPSTHYTAK EVIVGPDTTSYSLADLSPSTHYTAK IQALNGPLR	EVIVGPDTTSYSLADLSPSTHYTAK IQALNGPLR EVIVGPDTTSYSLADLSPSTHYTAK IQALNGPLR	2	2	3	19	12
TNC	Tenascin	TENA_HUMAN	50Step_Domain_p1900.0_to_1950.0	1900	1950	50.0 AA STEP	50	8	5	4	10	8	-0.06	1	6	9	ASVTGYLLVYESVDGTVK EVIVGPDTTSYSLADLSPSTHYTAK DLTATEVQSETALLTWRPPR EVIVGPDTTSYSLADLSPSTHYTAK EVIVGPDTTSYSLADLSPSTHYTAK	EVIVGPDTTSYSLADLSPSTHYTAK EVIVGPDTTSYSLADLSPSTHYTAK	4	3	2	15	11
TNC	Tenascin	TENA_HUMAN	50Step_Domain_p2050.0_to_2100.0	2050	2100	50.0 AA STEP	50	19	11	11	9	8	0.12	0.2205	14	8	DHGETAFAVYDK EEFWLGLDNLNK ITAQGQYELR DHGETAFAVYDK EEFWLGLDNLNK ITAQGQYELR DHGETAFAVYDK EEFWLGLDNLNK ITAQGQYELR	DHGETAFAVYDK EEFWLGLDNLNK ITAQGQYELR DHGETAFAVYDK EEFWLGLDNLNK ITAQGQYELR	9	6	6	13	11
TNC	Tenascin	TENA_HUMAN	50Step_Domain_p1800.0_to_1850.0	1800	1850	50.0 AA STEP	50	4	9	13	10	7	0.02	1	9	8	TVSGNTVEYALTDLEPATEYTLR TVSGNTVEYALTDLEPATEYTLR WQPAIATVDSYVISYTGEK TVSGNTVEYALTDLEPATEYTLR WQPAIATVDSYVISYTGEK	TVSGNTVEYALTDLEPATEYTLR WQPAIATVDSYVISYTGEK TVSGNTVEYALTDLEPATEYTLR WQPAIATVDSYVISYTGEK	2	5	7	16	10
TNC	Tenascin	TENA_HUMAN	50Step_Domain_p850.0_to_900.0	850	900	50.0 AA STEP	50	4	9	7	7	9	-0.02	1	7	8	ETFTTGLDAPR ETFTTGLDAPR TTIDLTEDENQYSIGNLKPDTEYEVSLISR ETFTTGLDAPR TTIDLTEDENQYSIGNLKPDTEYEVSLISR	ETFTTGLDAPR TTIDLTEDENQYSIGNLKPDTEYEVSLISR ETFTTGLDAPR TTIDLTEDENQYSIGNLKPDTEYEVSLISR	2	5	4	10	13
TNC	Tenascin	TENA_HUMAN	50Step_Domain_p950.0_to_1000.0	950	1000	50.0 AA STEP	50	8	4	9	4	10	0	1	7	7	EDKESNPATINAATELDTPK ESNPATINAATELDTPK EDKESNPATINAATELDTPK EDKESNPATINAATELDTPK ESNPATINAATELDTPK	EDKESNPATINAATELDTPK ESNPATINAATELDTPK EDKESNPATINAATELDTPK ESNPATINAATELDTPK TTLTGLRPGTEYGIGVSAVK	4	2	5	6	14
TNC	Tenascin	TENA_HUMAN	50Step_Domain_p1700.0_to_1750.0	1700	1750	50.0 AA STEP	50	6	5	7	10	3	0	1	6	6	APTAQVESFR ITYVPITGGTPSMVTVDGTK ITYVPITGGTPSMVTVDGTK APTAQVESFR ITYVPITGGTPSMVTVDGTK	APTAQVESFR ITYVPITGGTPSMVTVDGTK ITYVPITGGTPSMVTVDGTK	3	3	4	15	5
TNC	Tenascin	TENA_HUMAN	50Step_Domain_p800.0_to_850.0	800	850	50.0 AA STEP	50	4	7	5	7	6	-0.02	1	5	6	LDAPSQIEVK LDAPSQIEVK TTIDLTEDENQYSIGNLKPDTEYEVSLISR LDAPSQIEVK TTIDLTEDENQYSIGNLKPDTEYEVSLISR	LDAPSQIEVK TTIDLTEDENQYSIGNLKPDTEYEVSLISR LDAPSQIEVK TTIDLTEDENQYSIGNLKPDTEYEVSLISR	2	4	3	11	8
TNC	Tenascin	TENA_HUMAN	50Step_Domain_p900.0_to_950.0	900	950	50.0 AA STEP	50	4	5	7	8	5	-0.02	1	5	6	VSQTDNSITLEWR VSQTDNSITLEWR YAPISGGDHAEVDVPK VSQTDNSITLEWR YAPISGGDHAEVDVPK	VSQTDNSITLEWR YAPISGGDHAEVDVPK TTLTGLRPGTEYGIGVSAVK VSQTDNSITLEWR YAPISGGDHAEVDVPK	2	3	4	12	7
TNC	Tenascin	TENA_HUMAN	50Step_Domain_p700.0_to_750.0	700	750	50.0 AA STEP	50	2	2	4	5	8	-0.06	1	3	6	VATYLPAPEGLK VATYLPAPEGLK VATYLPAPEGLK	NMNKEDEGEITK VATYLPAPEGLK NMNKEDEGEITK VATYLPAPEGLK	1	1	2	8	12
TNC	Tenascin	TENA_HUMAN	50Step_Domain_p1850.0_to_1900.0	1850	1900	50.0 AA STEP	50	6	9	16	5	6	0.08	0.378	10	6	FTTDLDSPR TVSGNTVEYALTDLEPATEYTLR DLTATEVQSETALLTWRPPR FTTDLDSPR TVSGNTVEYALTDLEPATEYTLR FTTDLDSPR TVSGNTVEYALTDLEPATEYTLR	FTTDLDSPR TVSGNTVEYALTDLEPATEYTLR FTTDLDSPR TVSGNTVEYALTDLEPATEYTLR	3	5	9	7	9
TNC	Tenascin	TENA_HUMAN	50Step_Domain_p1050.0_to_1100.0	1050	1100	50.0 AA STEP	50	8	5	4	6	5	0	1	6	6	GLEPGQEYNVLLTAEK ASTEQAPELENLTVTEVGWDGLR GLEPGQEYNVLLTAEK GLEPGQEYNVLLTAEK	ASTEQAPELENLTVTEVGWDGLR GLEPGQEYNVLLTAEK ASTEQAPELENLTVTEVGWDGLR GLEPGQEYNVLLTAEK	4	3	2	9	7
TNC	Tenascin	TENA_HUMAN	50Step_Domain_p1750.0_to_1800.0	1750	1800	50.0 AA STEP	50	4	5	5	8	3	-0.02	1	5	6	ITYVPITGGTPSMVTVDGTK ITYVPITGGTPSMVTVDGTK ITYVPITGGTPSMVTVDGTK	ITYVPITGGTPSMVTVDGTK ITYVPITGGTPSMVTVDGTK	2	3	3	12	5
TNC	Tenascin	TENA_HUMAN	50Step_Domain_p750.0_to_800.0	750	800	50.0 AA STEP	50	2	5	2	4	4	-0.02	1	3	4	QTGLAPGQEYEISLHIVK QTGLAPGQEYEISLHIVK QTGLAPGQEYEISLHIVK	NMNKEDEGEITK QTGLAPGQEYEISLHIVK NMNKEDEGEITK QTGLAPGQEYEISLHIVK	1	3	1	6	6
TNC	Tenascin	TENA_HUMAN	50Step_Domain_p100.0_to_150.0	100	150	50.0 AA STEP	50	2	7	7	3	3	0.04	1	5	3	LEELENLVSSLR DLAPPSEPSESFQEHTVDGENQIVFTHR LEELENLVSSLR LEELENLVSSLR	LEELENLVSSLR LEELENLVSSLR	1	4	4	4	5
TNC	Tenascin	TENA_HUMAN	50Step_Domain_p1000.0_to_1050.0	1000	1050	50.0 AA STEP	50	8	4	4	4	2	0.04	1	5	3	GLEPGQEYNVLLTAEK GLEPGQEYNVLLTAEK GLEPGQEYNVLLTAEK	GLEPGQEYNVLLTAEK GLEPGQEYNVLLTAEK	4	2	2	6	3
TNC	Tenascin	TENA_HUMAN	50Step_Domain_p2000.0_to_2050.0	2000	2050	50.0 AA STEP	50	4	0	4	3	1	0.02	1	3	2	AYAAGFGDR ENFYQNWK ENFYQNWK	AYAAGFGDR ENFYQNWK ENFYQNWK	2	0	2	5	2
TNC	Tenascin	TENA_HUMAN	50Step_Domain_p1400.0_to_1450.0	1400	1450	50.0 AA STEP	50	8	4	0	1	1	0.06	1	4	1	AVDIPGLEAATPYR TPVLSAEASTAK AVDIPGLEAATPYR	AVDIPGLEAATPYR TPVLSAEASTAK AVDIPGLEAATPYR	4	2	0	2	1
TNC	Tenascin	TENA_HUMAN	50Step_Domain_p1650.0_to_1700.0	1650	1700	50.0 AA STEP	50	2	4	0	1	1	0.02	1	2	1	QSEPLEITLLAPER EATEYEIELYGISK QSEPLEITLLAPER	QSEPLEITLLAPER QSEPLEITLLAPER	1	2	0	1	2
TNC	Tenascin	TENA_HUMAN	50Step_Domain_p1200.0_to_1250.0	1200	1250	50.0 AA STEP	50	2	0	0	0	1	0.02	1	1	0	STDLPGLK	STDLPGLK	1	0	0	0	1
TNFAIP6	Tumor necrosis factor-inducible gene 6 protein	TSG6_HUMAN	50Step_Domain_p100.0_to_150.0	100	150	50.0 AA STEP	50	2	3	2	5	0	0	1	2	2	SPGFPNEYEDNQICYWHIR TGIIDYGIR TGIIDYGIR SPGFPNEYEDNQICYWHIR TGIIDYGIR	TGIIDYGIR	3	4	4	4	0
TNFAIP6	Tumor necrosis factor-inducible gene 6 protein	TSG6_HUMAN	50Step_Domain_p200.0_to_250.0	200	250	50.0 AA STEP	50	5	2	4	1	0	0.08	0.036	4	0	FLSDASVTAGGFQIK YCGDELPDDIISTGNVMTLK YVAMDPVSK FLSDASVTAGGFQIK FLSDASVTAGGFQIK YVAMDPVSK	FLSDASVTAGGFQIK	9	3	6	1	0
TUBA1A	Tubulin alpha-1A chain	TBA1A_HUMAN	50Step_Domain_p50.0_to_100.0	50	100	50.0 AA STEP	50	0	3	0	3	3	-0.04	0.012	1	3	AVFVDLEPTVIDEVR QLFHPEQLITGK TIGGGDDSFNTFFSETGAGK	AVFVDLEPTVIDEVR TIGGGDDSFNTFFSETGAGK AVFVDLEPTVIDEVR	0	4	0	6	3
TUBA1A	Tubulin alpha-1A chain	TBA1A_HUMAN	50Step_Domain_p100.0_to_150.0	100	150	50.0 AA STEP	50	0	2	0	1	1	0	1	1	1	EIIDLVLDR	EIIDLVLDR EIIDLVLDR	0	2	0	2	1
TUBA1A	Tubulin alpha-1A chain	TBA1A_HUMAN	50Step_Domain_p0_to_50	0	50	50.0 AA STEP	50	0	1	0	2	0	-0.02	1	0	1	TIGGGDDSFNTFFSETGAGK	TIGGGDDSFNTFFSETGAGK	0	1	0	3	0
TUBA1B	Tubulin alpha-1B chain	TBA1B_HUMAN	50Step_Domain_p50.0_to_100.0	50	100	50.0 AA STEP	50	0	3	0	3	3	-0.04	0.012	1	3	AVFVDLEPTVIDEVR QLFHPEQLITGK TIGGGDDSFNTFFSETGAGK	AVFVDLEPTVIDEVR TIGGGDDSFNTFFSETGAGK AVFVDLEPTVIDEVR	0	4	0	6	3
TUBA1B	Tubulin alpha-1B chain	TBA1B_HUMAN	50Step_Domain_p100.0_to_150.0	100	150	50.0 AA STEP	50	0	2	0	1	1	0	1	1	1	EIIDLVLDR	EIIDLVLDR EIIDLVLDR	0	2	0	2	1
TUBA1B	Tubulin alpha-1B chain	TBA1B_HUMAN	50Step_Domain_p0_to_50	0	50	50.0 AA STEP	50	0	1	0	2	0	-0.02	1	0	1	TIGGGDDSFNTFFSETGAGK	TIGGGDDSFNTFFSETGAGK	0	1	0	3	0
UGP2	UTP--glucose-1-phosphate uridylyltransferase	UGPA_HUMAN	50Step_Domain_p300.0_to_350.0	300	350	50.0 AA STEP	50	4	2	4	1	2	0.02	1	3	2	LVEIAQVPK LVEIAQVPK LVEIAQVPK	LVEIAQVPK LVEIAQVPK	1	1	1	1	3
UGP2	UTP--glucose-1-phosphate uridylyltransferase	UGPA_HUMAN	50Step_Domain_p100.0_to_150.0	100	150	50.0 AA STEP	50	0	4	0	2	1	-0.02	1	1	2	NENTFLDLTVQQIEHLNK	GLPDNISSVLNK GLPDNISSVLNK	0	2	0	4	2
UGP2	UTP--glucose-1-phosphate uridylyltransferase	UGPA_HUMAN	50Step_Domain_p150.0_to_200.0	150	200	50.0 AA STEP	50	0	4	0	1	1	0	1	1	1	NENTFLDLTVQQIEHLNK	ESLLPVAK ESLLPVAK	0	2	0	1	1
UGP2	UTP--glucose-1-phosphate uridylyltransferase	UGPA_HUMAN	50Step_Domain_p350.0_to_400.0	350	400	50.0 AA STEP	50	0	0	4	1	1	0	1	1	1	SFENSLGINVPR	SFENSLGINVPR SFENSLGINVPR	0	0	1	1	1
UGP2	UTP--glucose-1-phosphate uridylyltransferase	UGPA_HUMAN	50Step_Domain_p0_to_50	0	50	50.0 AA STEP	50	4	2	0	1	0	0.04	1	2	0	QELELSVK QELELSVK	ILTTASSHEFEHTK	1	1	0	1	0
VCAN	Versican core protein	CSPG2_HUMAN	50Step_Domain_p100.0_to_150.0	100	150	50.0 AA STEP	50	64	48	64	59	48	0.1	1	59	54	CDVMYGIEDTQDTVSLTVDGVVFHYR LLASDAGLYR VSVPTHPEAVGDASLTVVK LLASDAGLYR VSVPTHPEAVGDASLTVVK CDVMYGIEDTQDTVSLTVDGVVFHYR LLASDAGLYR VSVPTHPEAVGDASLTVVK	LLASDAGLYR VSVPTHPEAVGDASLTVVK LLASDAGLYR VSVPTHPEAVGDASLTVVK	19	13	42	102	73
VCAN	Versican core protein	CSPG2_HUMAN	50Step_Domain_p250.0_to_300.0	250	300	50.0 AA STEP	50	70	67	47	38	43	0.42	0	61	40	FTFEEAAK LATVGELQAAWR NGFDQCDYGWLSDASVR FTFEEAAK LATVGELQAAWR NGFDQCDYGWLSDASVR SPQETYDVYCYVDHLDGDVFHLTVPSK FTFEEAAK LATVGELQAAWR NGFDQCDYGWLSDASVR SPQETYDVYCYVDHLDGDVFHLTVPSK	FTFEEAAK FTFEEAAKECENQDAR LATVGELQAAWR NGFDQCDYGWLSDASVR FTFEEAAK LATVGELQAAWR NGFDQCDYGWLSDASVR	21	18	31	66	65
VCAN	Versican core protein	CSPG2_HUMAN	50Step_Domain_p1300.0_to_1350.0	1300	1350	50.0 AA STEP	50	0	4	12	29	37	-0.56	0	5	33	MSDLSVIGHPIDSESK MSDLSVIGHPIDSESK	MSDLSVIGHPIDSESK MSDLSVIGHPIDSESK	0	1	8	51	56
VCAN	Versican core protein	CSPG2_HUMAN	50Step_Domain_p1350.0_to_1400.0	1350	1400	50.0 AA STEP	50	0	4	12	29	37	-0.56	0	5	33	MSDLSVIGHPIDSESK MSDLSVIGHPIDSESK	MSDLSVIGHPIDSESK MSDLSVIGHPIDSESK	0	1	8	51	56
VCAN	Versican core protein	CSPG2_HUMAN	50Step_Domain_p300.0_to_350.0	300	350	50.0 AA STEP	50	30	33	15	17	17	0.18	0.0612	26	17	NGFDQCDYGWLSDASVR NGFDQCDYGWLSDASVR NGFDQCDYGWLSDASVR	AQCGGGLLGVR FENQTGFPPPDSR NGFDQCDYGWLSDASVR AQCGGGLLGVR FENQTGFPPPDSR NGFDQCDYGWLSDASVR	9	9	10	29	26
VCAN	Versican core protein	CSPG2_HUMAN	50Step_Domain_p150.0_to_200.0	150	200	50.0 AA STEP	50	30	11	21	13	13	0.16	0.2992	21	13	CDVMYGIEDTQDTVSLTVDGVVFHYR YTLNFEAAQK YTLNFEAAQK CDVMYGIEDTQDTVSLTVDGVVFHYR YTLNFEAAQK	YTLNFEAAQK YTLNFEAAQK	9	3	14	22	20
VCAN	Versican core protein	CSPG2_HUMAN	50Step_Domain_p2100.0_to_2150.0	2100	2150	50.0 AA STEP	50	3	7	6	15	9	-0.14	0.884	5	12	QEIESETTSEEQIQEEK QEVNPVRQEIESETTSEEQIQEEK QEIESETTSEEQIQEEK QEVNPVRQEIESETTSEEQIQEEK	QEIESETTSEEQIQEEK QEVNPVRQEIESETTSEEQIQEEK QEIESETTSEEQIQEEK	1	2	4	26	14
VCAN	Versican core protein	CSPG2_HUMAN	50Step_Domain_p3200.0_to_3250.0	3200	3250	50.0 AA STEP	50	10	26	17	5	6	0.24	0	18	6	LQGAHLTSILSHEEQMFVNR VGHDYQWIGLNDK LQGAHLTSILSHEEQMFVNR VGHDYQWIGLNDK	VGHDYQWIGLNDK VGHDYQWIGLNDK	3	7	11	8	9
VCAN	Versican core protein	CSPG2_HUMAN	50Step_Domain_p1900.0_to_1950.0	1900	1950	50.0 AA STEP	50	3	7	2	5	5	-0.02	1	4	5	LGEPNYGAEIR LGEPNYGAEIR LGEPNYGAEIR	LGEPNYGAEIR LGEPNYGAEIR	1	2	1	8	8
VCAN	Versican core protein	CSPG2_HUMAN	50Step_Domain_p600.0_to_650.0	600	650	50.0 AA STEP	50	0	0	3	3	3	-0.04	1	1	3	ITEEFLGK	ITEEFLGK ITEEFLGK	0	0	2	5	5
VCAN	Versican core protein	CSPG2_HUMAN	50Step_Domain_p3300.0_to_3350.0	3300	3350	50.0 AA STEP	50	3	4	3	2	2	0.02	1	3	2	YEINSLIR YEINSLIR YEINSLIR	YEINSLIR YEINSLIR	1	1	2	4	3
VCAN	Versican core protein	CSPG2_HUMAN	50Step_Domain_p700.0_to_750.0	700	750	50.0 AA STEP	50	0	0	2	2	2	-0.02	1	1	2	TEEEVFSGMK	TEEEVFSGMK TEEEVFSGMK	0	0	1	4	3
VCAN	Versican core protein	CSPG2_HUMAN	50Step_Domain_p3100.0_to_3150.0	3100	3150	50.0 AA STEP	50	0	0	2	1	1	0	1	1	1	NGATCVDGFNTFR	NGATCVDGFNTFR NGATCVDGFNTFR	0	0	1	1	1
XYLT1	Xylosyltransferase 1	XYLT1_HUMAN	50Step_Domain_p700.0_to_750.0	700	750	50.0 AA STEP	50	12	10	8	7	7	0.06	0.194	10	7	IASPPSDFGR LETLETWVMPK LQFSEVGTDWDAK LETLETWVMPK LQFSEVGTDWDAK IASPPSDFGR LETLETWVMPK LQFSEVGTDWDAK	IASPPSDFGR LETLETWVMPK LQFSEVGTDWDAK IASPPSDFGR LETLETWVMPK LQFSEVGTDWDAK	5	3	5	10	12
XYLT1	Xylosyltransferase 1	XYLT1_HUMAN	50Step_Domain_p750.0_to_800.0	750	800	50.0 AA STEP	50	0	0	2	3	6	-0.06	0.024	1	4	NFGGLLGPMDEPVGMQK	NFGGLLGPMDEPVGMQK NFGGLLGPMDEPVGMQK	0	0	1	5	11
XYLT1	Xylosyltransferase 1	XYLT1_HUMAN	50Step_Domain_p850.0_to_900.0	850	900	50.0 AA STEP	50	0	0	2	3	5	-0.06	0.086	1	4	NAYMEQSFQSLNPVLSLPINPAQVEQAR	NAYMEQSFQSLNPVLSLPINPAQVEQAR NAYMEQSFQSLNPVLSLPINPAQVEQAR	0	0	1	4	8
XYLT1	Xylosyltransferase 1	XYLT1_HUMAN	50Step_Domain_p300.0_to_350.0	300	350	50.0 AA STEP	50	5	0	0	3	2	0	1	2	2	NVQWDEDSVEYMPANPVR	NVQWDEDSVEYMPANPVR NVQWDEDSVEYMPANPVR	2	0	0	4	4
XYLT1	Xylosyltransferase 1	XYLT1_HUMAN	50Step_Domain_p400.0_to_450.0	400	450	50.0 AA STEP	50	2	0	3	3	2	0	1	2	2	TNDQLVAFLSR TNDQLVAFLSR	TNDQLVAFLSR TNDQLVAFLSR	1	0	2	4	4
XYLT1	Xylosyltransferase 1	XYLT1_HUMAN	50Step_Domain_p800.0_to_850.0	800	850	50.0 AA STEP	50	2	7	3	2	1	0.04	0.596	4	2	FLVAPLTFSNR FLVAPLTFSNR ILHHWVPVAETK ILHHWVPVAETK	FLVAPLTFSNR ILHHWVPVAETK FLVAPLTFSNR	1	2	2	3	1
XYLT1	Xylosyltransferase 1	XYLT1_HUMAN	50Step_Domain_p450.0_to_500.0	450	500	50.0 AA STEP	50	2	3	3	1	2	0.02	1	3	2	IPEGIAVDGGSDWFLLNR IPEGIAVDGGSDWFLLNR IPEGIAVDGGSDWFLLNR	IPEGIAVDGGSDWFLLNR IPEGIAVDGGSDWFLLNR	1	1	2	2	3
XYLT1	Xylosyltransferase 1	XYLT1_HUMAN	50Step_Domain_p200.0_to_250.0	200	250	50.0 AA STEP	50	2	0	2	1	1	0	1	1	1	GPGEVLPPGDR GPGEVLPPGDR	GPGEVLPPGDR GPGEVLPPGDR	1	0	1	1	2
XYLT1	Xylosyltransferase 1	XYLT1_HUMAN	50Step_Domain_p150.0_to_200.0	150	200	50.0 AA STEP	50	0	0	2	1	1	0	1	1	1	DFENVDNSNFAPR	DFENVDNSNFAPR DFENVDNSNFAPR	0	0	1	1	1
YWHAE	14-3-3 protein epsilon	1433E_HUMAN	50Step_Domain_p200.0_to_250.0	200	250	50.0 AA STEP	50	3	4	2	4	6	-0.04	0.1644	3	5	AAFDDAIAELDTLSEESYK DSTLIMQLLR DSTLIMQLLR DSTLIMQLLR	AAFDDAIAELDTLSEESYK DSTLIMQLLR EALQDVEDENQ AAFDDAIAELDTLSEESYK DSTLIMQLLR	2	5	1	6	4
YWHAE	14-3-3 protein epsilon	1433E_HUMAN	50Step_Domain_p150.0_to_200.0	150	200	50.0 AA STEP	50	3	0	0	3	4	-0.06	0.0462	1	4	AAFDDAIAELDTLSEESYK EAAENSLVAYK	AAFDDAIAELDTLSEESYK AASDIAMTELPPTHPIR EAAENSLVAYK AAFDDAIAELDTLSEESYK EAAENSLVAYK	2	0	0	4	3
YWHAE	14-3-3 protein epsilon	1433E_HUMAN	50Step_Domain_p0_to_50	0	50	50.0 AA STEP	50	4	4	5	2	1	0.04	0.0192	4	2	NLLSVAYK VAGMDVELTVEER NLLSVAYK VAGMDVELTVEER YDEMVESMK NLLSVAYK VAGMDVELTVEER	NLLSVAYK VAGMDVELTVEER NLLSVAYK	3	5	3	3	1
YWHAE	14-3-3 protein epsilon	1433E_HUMAN	50Step_Domain_p100.0_to_150.0	100	150	50.0 AA STEP	50	1	0	0	1	1	-0.02	1	0	1	EAAENSLVAYK	EAAENSLVAYK HLIPAANTGESK EAAENSLVAYK	1	0	0	2	1

## Sheet: List of biomarker candidates
List of proteins with at least one 50 aa segment exhibiting significant differences in average PSM count between young and aged
Biomarker Candidates	Uniprot AC
Adipocyte enhancer-binding protein 1	AEBP1_HUMAN
Aggrecan core protein	PGCA_HUMAN
Alpha-2-macroglobulin	A2MG_HUMAN
Alpha-enolase	ENOA_HUMAN
Angiotensinogen	ANGT_HUMAN
Annexin A5	ANXA5_HUMAN
Apolipoprotein E	APOE_HUMAN
Biglycan	PGS1_HUMAN
Cartilage acidic protein 1	CRAC1_HUMAN
Cartilage intermediate layer protein 1	CILP1_HUMAN
Cartilage oligomeric matrix protein	COMP_HUMAN
Ceruloplasmin	CERU_HUMAN
Chondroadherin	CHAD_HUMAN
Clusterin	CLUS_HUMAN
Coiled-coil domain-containing protein 80	CCD80_HUMAN
Collagen alpha-1(II) chain	CO2A1_HUMAN
Collagen alpha-1(VI) chain	CO6A1_HUMAN
Collagen alpha-1(XII) chain	COCA1_HUMAN
Collagen alpha-2(I) chain	CO1A2_HUMAN
Collagen alpha-2(VI) chain	CO6A2_HUMAN
Collagen alpha-3(VI) chain	CO6A3_HUMAN
Complement C3	CO3_HUMAN
Complement factor H	CFAH_HUMAN
Fibromodulin	FMOD_HUMAN
Fibulin-1	FBLN1_HUMAN
Glutathione peroxidase 3	GPX3_HUMAN
Inhibin beta A chain	INHBA_HUMAN
Lumican	LUM_HUMAN
Matrix-remodeling-associated protein 5	MXRA5_HUMAN
Platelet-derived growth factor receptor-like protein	PGFRL_HUMAN
Procollagen C-endopeptidase enhancer 1	PCOC1_HUMAN
Proteoglycan 4	PRG4_HUMAN
Reticulocalbin-3	RCN3_HUMAN
SPARC-related modular calcium-binding protein 1	SMOC1_HUMAN
Sushi repeat-containing protein SRPX2	SRPX2_HUMAN
Tenascin	TENA_HUMAN
Thrombospondin-1	TSP1_HUMAN
Thrombospondin-2	TSP2_HUMAN
Thrombospondin-4	TSP4_HUMAN
Versican core protein	CSPG2_HUMAN
Vitamin K-dependent protein S	PROS_HUMAN
14-3-3 protein epsilon	1433E_HUMAN
2-phospho-D-glycerate hydro-lyase	A0A024R4F1_HUMAN
78 kDa glucose-regulated protein	V9HWB4_HUMAN
Activin beta-A chain	Q53H39_HUMAN
Alpha-1;4 glucan phosphorylase	Q59GM9_HUMAN
Alpha-1-acid glycoprotein 1	A1AG1_HUMAN
Angiogenin	ANGI_HUMAN
Angiopoietin-related protein 2	ANGL2_HUMAN
Angiotensin 1-10	B4E1B3_HUMAN
Annexin	V9HWE0_HUMAN
C3/C5 convertase	B4E1Z4_HUMAN
C3-beta-c	V9HWA9_HUMAN
Calreticulin	CALR_HUMAN
Calsyntenin-1	CSTN1_HUMAN
Calumenin	CALU_HUMAN
Cartilage intermediate layer protein 2	K7EPJ4_HUMAN
CCN family member 2	CCN2_HUMAN
CD109 antigen	CD109_HUMAN
cDNA; FLJ93141; highly similar to Homo sapiens coagulation factor XIII; A1 polypeptide (F13A1); mRNA	B2R6V9_HUMAN
Chordin	CHRD_HUMAN
Chordin-like protein 2	CRDL2_HUMAN
Collagen alpha-1(I) chain	CO1A1_HUMAN
Collagen alpha-1(III) chain	CO3A1_HUMAN
Collagen alpha-1(V) chain	CO5A1_HUMAN
Collagen alpha-1(XVIII) chain	COIA1_HUMAN
Collagen alpha-2(IX) chain	CO9A2_HUMAN
Collagen; type XI; alpha 1; isoform CRA_c	D3DT72_HUMAN
Connective tissue growth factor	Q5M8T4_HUMAN
C-type lectin domain family 3 member A	CLC3A_HUMAN
Endoplasmic reticulum chaperone BiP	BIP_HUMAN
Epididymis luminal protein 2	V9HW98_HUMAN
Epididymis luminal protein 70	V9HWC0_HUMAN
Epididymis secretory sperm binding protein Li 164nA	V9HWJ0_HUMAN
Ferritin	B3KXC3_HUMAN
Ferritin heavy chain	FRIH_HUMAN
Fibrillin-1	FBN1_HUMAN
Frizzled-related protein 1	B2R6W4_HUMAN
HCG1991735; isoform CRA_a	A0A024RC65_HUMAN
HHIP-like protein 1	HIPL1_HUMAN
HHIP-like protein 2	HIPL2_HUMAN
Histone H2B	A0A024RCJ2_HUMAN
Histone H2B type 1-B	H2B1B_HUMAN
Histone H2B type 1-J	H2B1J_HUMAN
Histone H2B type 1-O	H2B1O_HUMAN
Histone H2B type 2-E	H2B2E_HUMAN
Histone H4	H4_HUMAN
IGK@ protein	Q6P5S8_HUMAN
Immunoglobulin superfamily containing leucine-rich repeat protein	ISLR_HUMAN
Insulin-like growth factor-binding protein 7	IBP7_HUMAN
Keratin; type II cytoskeletal 5	K2C5_HUMAN
Latent-transforming growth factor beta-binding protein 2	LTBP2_HUMAN
Lysyl oxidase homolog 3	LOXL3_HUMAN
Mesenchymal stromal cell-and fibroblast-expressing Linx paralogue	A0A146E5L3_HUMAN
Mimecan	B4DI63_HUMAN
Moesin	MOES_HUMAN
Neuroblast differentiation-associated protein AHNAK	AHNK_HUMAN
Neutral alpha-glucosidase AB	GANAB_HUMAN
Nuclear envelope protein okuribin	A3KC71_HUMAN
Osteopontin	OSTP_HUMAN
Osteopontin-D	F2YQ21_HUMAN
Out at first protein homolog	OAF_HUMAN
Phospholipid transfer protein	PLTP_HUMAN
Plectin	PLEC_HUMAN
Plexin domain-containing protein 2	PXDC2_HUMAN
Procollagen C-endopeptidase enhancer 2	PCOC2_HUMAN
Procollagen-lysine;2-oxoglutarate 5-dioxygenase 1	PLOD1_HUMAN
Prolow-density lipoprotein receptor-related protein 1	LRP1_HUMAN
Protein disulfide-isomerase A4	PDIA4_HUMAN
Pyruvate kinase PKM	KPYM_HUMAN
Ras GTPase-activating-like protein IQGAP1	IQGA1_HUMAN
Ribonuclease A A1	W0UV28_HUMAN
Secreted frizzled-related protein 3	SFRP3_HUMAN
Semaphorin-3C	SEM3C_HUMAN
Serpin peptidase inhibitor; clade E (Nexin; plasminogen activator inhibitor type 1); member 2; isoform CRA_b	A0A024R498_HUMAN
SPARC-related modular calcium-binding protein 2	SMOC2_HUMAN
Target of Nesh-SH3	D3YTG3_HUMAN
Tubulin alpha chain	A8JZY9_HUMAN
Tubulin alpha-1A chain	TBA1A_HUMAN
Tubulin alpha-1B chain	TBA1B_HUMAN
Tumor necrosis factor-inducible gene 6 protein	TSG6_HUMAN
Uncharacterized protein	Q8WVW5_HUMAN
Uncharacterized protein DKFZp686C11235	Q6MZV7_HUMAN
Vascular endothelial growth factor receptor 1	VGFR1_HUMAN
Xylosyltransferase 1	XYLT1_HUMAN
Macrophage-capping protein	B2R9S4_HUMAN
