# Supplementary material for: Peptide Location Fingerprinting Reveals Tissue Region-specific Differences in Protein Structures in an Ageing Human Organ
Source: Preprints.org preprint supplement (doi:10.20944/preprints202107.0670.v1), 2021-07-29
Supplement: Supplementary file 5 [file Table S5_Peptide location fingerprinting of left lateral inner AF.xlsx]

## Sheet: PLF of Left lateral IAF O vs Y
Gene	Protein Name	Uniprot AC	Domain_Name 2	Domain_Start 2	Domain_Finish 2	Domain Type 2	Domain_Length 2	Mudpit_Aged_L3_4Left_IAF_1 2	Mudpit_Aged_L4_5_Left_IAF_1 2	Mudpit_Aged_L5_S1Left_IAF_1 2	Mudpit_Young_L3_4Left_IAF_1 2	Mudpit_Young_L4_5_Left_IAF_1 2	Mudpit_Young_L5_S1Left_IAF_1 2	Diff Young vs Aged 2	p: Young vs Aged 2	Aged 2	Young 2	Peptides Aged 2	Peptides Young 2	Original_Mudpit_Aged_L3_4Left_IAF_1 2	Original_Mudpit_Aged_L4_5_Left_IAF_1 2	Original_Mudpit_Aged_L5_S1Left_IAF_1 2	Original_Mudpit_Young_L3_4Left_IAF_1 2	Original_Mudpit_Young_L4_5_Left_IAF_1 2	Original_Mudpit_Young_L5_S1Left_IAF_1 2
GC	Gc-globulin	D6RF35_HUMAN	Albumin	16	208	DOMAINS	192	14	13	13	0	0	0	0.0677083	0.0182	13	0	EDFTSLSLVLYSR FPSGTFEQVSQLVK HQPQEFPTYVEPTNDEICEAFR KFPSGTFEQVSQLVK EDFTSLSLVLYSR FPSGTFEQVSQLVK HLSLLTTLSNR HQPQEFPTYVEPTNDEICEAFR FPSGTFEQVSQLVK		28	22	2	0	0	0
GC	Gc-globulin	D6RF35_HUMAN	Albumin_209_394	209	394	DOMAINS	185	16	17	0	0	0	0	0.0594595	0.045	11	0	KELSSFIDK THLPEVFLSK VPTADLEDVLPLAEDITNILSK HLSLLTTLSNR KELSSFIDK THLPEVFLSK VPTADLEDVLPLAEDITNILSK		32	30	0	0	0	0
GC	Gc-globulin	D6RF35_HUMAN	50Step_Domain_p0_to_50	0	50	50.0 AA STEP	50	3	5	0	0	0	0	0.06	1	3	0	EDFTSLSLVLYSR EDFTSLSLVLYSR		6	8	0	0	0	0
GC	Gc-globulin	D6RF35_HUMAN	50Step_Domain_p50.0_to_100.0	50	100	50.0 AA STEP	50	8	6	13	0	0	0	0.18	0.002	9	0	FPSGTFEQVSQLVK KFPSGTFEQVSQLVK FPSGTFEQVSQLVK FPSGTFEQVSQLVK		16	10	2	0	0	0
GC	Gc-globulin	D6RF35_HUMAN	50Step_Domain_p100.0_to_150.0	100	150	50.0 AA STEP	50	3	1	0	0	0	0	0.02	1	1	0	HQPQEFPTYVEPTNDEICEAFR HQPQEFPTYVEPTNDEICEAFR		6	2	0	0	0	0
GC	Gc-globulin	D6RF35_HUMAN	50Step_Domain_p150.0_to_200.0	150	200	50.0 AA STEP	50	0	0	0	0	0	0	0	1	0	0			0	0	0	0	0	0
GC	Gc-globulin	D6RF35_HUMAN	50Step_Domain_p200.0_to_250.0	200	250	50.0 AA STEP	50	6	11	0	0	0	0	0.12	0.144	6	0	VPTADLEDVLPLAEDITNILSK HLSLLTTLSNR VPTADLEDVLPLAEDITNILSK		12	20	0	0	0	0
GC	Gc-globulin	D6RF35_HUMAN	50Step_Domain_p250.0_to_300.0	250	300	50.0 AA STEP	50	6	10	0	0	0	0	0.1	0.207	5	0	VPTADLEDVLPLAEDITNILSK VPTADLEDVLPLAEDITNILSK		12	18	0	0	0	0
GC	Gc-globulin	D6RF35_HUMAN	50Step_Domain_p300.0_to_350.0	300	350	50.0 AA STEP	50	0	0	0	0	0	0	0	1	0	0			0	0	0	0	0	0
GC	Gc-globulin	D6RF35_HUMAN	50Step_Domain_p350.0_to_400.0	350	400	50.0 AA STEP	50	14	10	13	0	0	0	0.24	0	12	0	ELSSFIDK KELSSFIDK THLPEVFLSK ELSSFIDK KELSSFIDK THLPEVFLSK ELSSFIDK		28	18	2	0	0	0
GC	Gc-globulin	D6RF35_HUMAN	50Step_Domain_p400.0_to_450.0	400	450	50.0 AA STEP	50	13	13	27	0	0	0	0.36	0	18	0	ELSSFIDK GQELCADYSENTFTEYK KELSSFIDK LPDATPTELAK AKLPDATPTELAK ELSSFIDK GQELCADYSENTFTEYK KELSSFIDK LPDATPTELAK ELSSFIDK LPDATPTELAK		26	22	4	0	0	0
GC	Gc-globulin	D6RF35_HUMAN	50Step_Domain_p450.0_to_476.0	450	476	50.0 AA STEP	26	0	0	0	0	0	0	0	1	0	0			0	0	0	0	0	0
GC	Gc-globulin	D6RF35_HUMAN	80Step_Domain_p0_to_80	0	80	80.0 AA STEP	80	11	10	13	0	0	0	0.1375	0.0006	11	0	EDFTSLSLVLYSR FPSGTFEQVSQLVK KFPSGTFEQVSQLVK EDFTSLSLVLYSR FPSGTFEQVSQLVK FPSGTFEQVSQLVK		22	18	2	0	0	0
GC	Gc-globulin	D6RF35_HUMAN	80Step_Domain_p80.0_to_160.0	80	160	80.0 AA STEP	80	3	1	0	0	0	0	0.0125	1	1	0	HQPQEFPTYVEPTNDEICEAFR HQPQEFPTYVEPTNDEICEAFR		6	2	0	0	0	0
GC	Gc-globulin	D6RF35_HUMAN	80Step_Domain_p160.0_to_240.0	160	240	80.0 AA STEP	80	0	1	0	0	0	0	0	1	0	0	HLSLLTTLSNR		0	2	0	0	0	0
GC	Gc-globulin	D6RF35_HUMAN	80Step_Domain_p240.0_to_320.0	240	320	80.0 AA STEP	80	6	10	0	0	0	0	0.0625	0.198	5	0	VPTADLEDVLPLAEDITNILSK VPTADLEDVLPLAEDITNILSK		12	18	0	0	0	0
GC	Gc-globulin	D6RF35_HUMAN	80Step_Domain_p320.0_to_400.0	320	400	80.0 AA STEP	80	14	10	13	0	0	0	0.15	0	12	0	ELSSFIDK KELSSFIDK THLPEVFLSK ELSSFIDK KELSSFIDK THLPEVFLSK ELSSFIDK		28	18	2	0	0	0
GC	Gc-globulin	D6RF35_HUMAN	80Step_Domain_p400.0_to_476.0	400	476	80.0 AA STEP	76	13	13	27	0	0	0	0.236842	0	18	0	ELSSFIDK GQELCADYSENTFTEYK KELSSFIDK LPDATPTELAK AKLPDATPTELAK ELSSFIDK GQELCADYSENTFTEYK KELSSFIDK LPDATPTELAK ELSSFIDK LPDATPTELAK		26	22	4	0	0	0
GC	Gc-globulin	D6RF35_HUMAN	100Step_Domain_p0_to_100	0	100	100.0 AA STEP	100	11	10	13	0	0	0	0.11	0.002	11	0	EDFTSLSLVLYSR FPSGTFEQVSQLVK KFPSGTFEQVSQLVK EDFTSLSLVLYSR FPSGTFEQVSQLVK FPSGTFEQVSQLVK		22	18	2	0	0	0
GC	Gc-globulin	D6RF35_HUMAN	100Step_Domain_p100.0_to_200.0	100	200	100.0 AA STEP	100	3	1	0	0	0	0	0.01	1	1	0	HQPQEFPTYVEPTNDEICEAFR HQPQEFPTYVEPTNDEICEAFR		6	2	0	0	0	0
GC	Gc-globulin	D6RF35_HUMAN	100Step_Domain_p200.0_to_300.0	200	300	100.0 AA STEP	100	6	11	0	0	0	0	0.06	0.222	6	0	VPTADLEDVLPLAEDITNILSK HLSLLTTLSNR VPTADLEDVLPLAEDITNILSK		12	20	0	0	0	0
GC	Gc-globulin	D6RF35_HUMAN	100Step_Domain_p300.0_to_400.0	300	400	100.0 AA STEP	100	14	10	13	0	0	0	0.12	0.0005	12	0	ELSSFIDK KELSSFIDK THLPEVFLSK ELSSFIDK KELSSFIDK THLPEVFLSK ELSSFIDK		28	18	2	0	0	0
GC	Gc-globulin	D6RF35_HUMAN	100Step_Domain_p400.0_to_476.0	400	476	100.0 AA STEP	76	13	13	27	0	0	0	0.236842	0	18	0	ELSSFIDK GQELCADYSENTFTEYK KELSSFIDK LPDATPTELAK AKLPDATPTELAK ELSSFIDK GQELCADYSENTFTEYK KELSSFIDK LPDATPTELAK ELSSFIDK LPDATPTELAK		26	22	4	0	0	0
N/A	Cell proliferation-inducing protein 41	A1KY36_HUMAN	Disordered	116	395	REGIONS	279	0	2	0	3	4	0	-0.00358423	0.2494	1	2	VEIPLASLR	VEIPLASLR VEIPLASLR	0	2	0	6	4	0
N/A	Cell proliferation-inducing protein 41	A1KY36_HUMAN	Disordered_461_589	461	589	REGIONS	128	0	0	0	0	0	0	0	1	0	0			0	0	0	0	0	0
N/A	Cell proliferation-inducing protein 41	A1KY36_HUMAN	50Step_Domain_p0_to_50	0	50	50.0 AA STEP	50	0	0	0	0	0	0	0	1	0	0			0	0	0	0	0	0
N/A	Cell proliferation-inducing protein 41	A1KY36_HUMAN	50Step_Domain_p50.0_to_100.0	50	100	50.0 AA STEP	50	0	0	0	0	0	0	0	1	0	0			0	0	0	0	0	0
N/A	Cell proliferation-inducing protein 41	A1KY36_HUMAN	50Step_Domain_p100.0_to_150.0	100	150	50.0 AA STEP	50	0	2	0	3	4	0	-0.02	0.171	1	2	VEIPLASLR	VEIPLASLR VEIPLASLR	0	2	0	6	4	0
N/A	Cell proliferation-inducing protein 41	A1KY36_HUMAN	50Step_Domain_p150.0_to_200.0	150	200	50.0 AA STEP	50	0	0	0	0	0	0	0	1	0	0			0	0	0	0	0	0
N/A	Cell proliferation-inducing protein 41	A1KY36_HUMAN	50Step_Domain_p200.0_to_250.0	200	250	50.0 AA STEP	50	0	0	0	0	0	0	0	1	0	0			0	0	0	0	0	0
N/A	Cell proliferation-inducing protein 41	A1KY36_HUMAN	50Step_Domain_p250.0_to_300.0	250	300	50.0 AA STEP	50	0	0	0	0	0	0	0	1	0	0			0	0	0	0	0	0
N/A	Cell proliferation-inducing protein 41	A1KY36_HUMAN	50Step_Domain_p300.0_to_350.0	300	350	50.0 AA STEP	50	0	0	0	0	0	0	0	1	0	0			0	0	0	0	0	0
N/A	Cell proliferation-inducing protein 41	A1KY36_HUMAN	50Step_Domain_p350.0_to_400.0	350	400	50.0 AA STEP	50	0	0	0	0	0	0	0	1	0	0			0	0	0	0	0	0
N/A	Cell proliferation-inducing protein 41	A1KY36_HUMAN	50Step_Domain_p400.0_to_450.0	400	450	50.0 AA STEP	50	0	0	0	0	0	0	0	1	0	0			0	0	0	0	0	0
N/A	Cell proliferation-inducing protein 41	A1KY36_HUMAN	50Step_Domain_p450.0_to_500.0	450	500	50.0 AA STEP	50	0	0	0	0	0	0	0	1	0	0			0	0	0	0	0	0
N/A	Cell proliferation-inducing protein 41	A1KY36_HUMAN	50Step_Domain_p500.0_to_550.0	500	550	50.0 AA STEP	50	0	0	0	0	0	0	0	1	0	0			0	0	0	0	0	0
N/A	Cell proliferation-inducing protein 41	A1KY36_HUMAN	50Step_Domain_p550.0_to_600.0	550	600	50.0 AA STEP	50	0	0	0	0	0	0	0	1	0	0			0	0	0	0	0	0
N/A	Cell proliferation-inducing protein 41	A1KY36_HUMAN	50Step_Domain_p600.0_to_650.0	600	650	50.0 AA STEP	50	0	0	0	0	0	0	0	1	0	0			0	0	0	0	0	0
N/A	Cell proliferation-inducing protein 41	A1KY36_HUMAN	50Step_Domain_p650.0_to_700.0	650	700	50.0 AA STEP	50	6	5	0	3	2	0	0.04	0.0405	4	2	GGNVWVALFK NNEPVMYTYDEYK NNEPVMYTYDEYK	GGNVWVALFK NNEPVMYTYDEYK NNEPVMYTYDEYK	4	6	0	6	2	0
N/A	Cell proliferation-inducing protein 41	A1KY36_HUMAN	50Step_Domain_p700.0_to_745.0	700	745	50.0 AA STEP	45	0	0	0	0	0	0	0	1	0	0			0	0	0	0	0	0
N/A	Cell proliferation-inducing protein 41	A1KY36_HUMAN	80Step_Domain_p0_to_80	0	80	80.0 AA STEP	80	0	0	0	0	0	0	0	1	0	0			0	0	0	0	0	0
N/A	Cell proliferation-inducing protein 41	A1KY36_HUMAN	80Step_Domain_p80.0_to_160.0	80	160	80.0 AA STEP	80	0	2	0	3	4	0	-0.0125	0.392	1	2	VEIPLASLR	VEIPLASLR VEIPLASLR	0	2	0	6	4	0
N/A	Cell proliferation-inducing protein 41	A1KY36_HUMAN	80Step_Domain_p160.0_to_240.0	160	240	80.0 AA STEP	80	0	0	0	0	0	0	0	1	0	0			0	0	0	0	0	0
N/A	Cell proliferation-inducing protein 41	A1KY36_HUMAN	80Step_Domain_p240.0_to_320.0	240	320	80.0 AA STEP	80	0	0	0	0	0	0	0	1	0	0			0	0	0	0	0	0
N/A	Cell proliferation-inducing protein 41	A1KY36_HUMAN	80Step_Domain_p320.0_to_400.0	320	400	80.0 AA STEP	80	0	0	0	0	0	0	0	1	0	0			0	0	0	0	0	0
N/A	Cell proliferation-inducing protein 41	A1KY36_HUMAN	80Step_Domain_p400.0_to_480.0	400	480	80.0 AA STEP	80	0	0	0	0	0	0	0	1	0	0			0	0	0	0	0	0
N/A	Cell proliferation-inducing protein 41	A1KY36_HUMAN	80Step_Domain_p480.0_to_560.0	480	560	80.0 AA STEP	80	0	0	0	0	0	0	0	1	0	0			0	0	0	0	0	0
N/A	Cell proliferation-inducing protein 41	A1KY36_HUMAN	80Step_Domain_p560.0_to_640.0	560	640	80.0 AA STEP	80	0	0	0	0	0	0	0	1	0	0			0	0	0	0	0	0
N/A	Cell proliferation-inducing protein 41	A1KY36_HUMAN	80Step_Domain_p640.0_to_720.0	640	720	80.0 AA STEP	80	6	5	0	3	2	0	0.025	0.144	4	2	GGNVWVALFK NNEPVMYTYDEYK NNEPVMYTYDEYK	GGNVWVALFK NNEPVMYTYDEYK NNEPVMYTYDEYK	4	6	0	6	2	0
N/A	Cell proliferation-inducing protein 41	A1KY36_HUMAN	80Step_Domain_p720.0_to_745.0	720	745	80.0 AA STEP	25	0	0	0	0	0	0	0	1	0	0			0	0	0	0	0	0
N/A	Cell proliferation-inducing protein 41	A1KY36_HUMAN	100Step_Domain_p0_to_100	0	100	100.0 AA STEP	100	0	0	0	0	0	0	0	1	0	0			0	0	0	0	0	0
N/A	Cell proliferation-inducing protein 41	A1KY36_HUMAN	100Step_Domain_p100.0_to_200.0	100	200	100.0 AA STEP	100	0	2	0	3	4	0	-0.01	0.524	1	2	VEIPLASLR	VEIPLASLR VEIPLASLR	0	2	0	6	4	0
N/A	Cell proliferation-inducing protein 41	A1KY36_HUMAN	100Step_Domain_p200.0_to_300.0	200	300	100.0 AA STEP	100	0	0	0	0	0	0	0	1	0	0			0	0	0	0	0	0
N/A	Cell proliferation-inducing protein 41	A1KY36_HUMAN	100Step_Domain_p300.0_to_400.0	300	400	100.0 AA STEP	100	0	0	0	0	0	0	0	1	0	0			0	0	0	0	0	0
N/A	Cell proliferation-inducing protein 41	A1KY36_HUMAN	100Step_Domain_p400.0_to_500.0	400	500	100.0 AA STEP	100	0	0	0	0	0	0	0	1	0	0			0	0	0	0	0	0
N/A	Cell proliferation-inducing protein 41	A1KY36_HUMAN	100Step_Domain_p500.0_to_600.0	500	600	100.0 AA STEP	100	0	0	0	0	0	0	0	1	0	0			0	0	0	0	0	0
N/A	Cell proliferation-inducing protein 41	A1KY36_HUMAN	100Step_Domain_p600.0_to_700.0	600	700	100.0 AA STEP	100	6	5	0	3	2	0	0.02	0.2312	4	2	GGNVWVALFK NNEPVMYTYDEYK NNEPVMYTYDEYK	GGNVWVALFK NNEPVMYTYDEYK NNEPVMYTYDEYK	4	6	0	6	2	0
N/A	Cell proliferation-inducing protein 41	A1KY36_HUMAN	100Step_Domain_p700.0_to_745.0	700	745	100.0 AA STEP	45	0	0	0	0	0	0	0	1	0	0			0	0	0	0	0	0
N/A	cDNA PSEC0172 fis; clone PLACE1011835; highly similar to Procollagen C-endopeptidase enhancer 2	B3KQT8_HUMAN	CUB	33	144	DOMAINS	111	16	16	28	12	10	13	0.0720721	0.114	20	12	FIDLESDNLCR YDFVDVYNGHANGQR FIDLESDNLCR FIDLESDNLCR	FIDLESDNLCR FIDLESDNLCR FIDLESDNLCR	16	22	24	14	6	8
N/A	cDNA PSEC0172 fis; clone PLACE1011835; highly similar to Procollagen C-endopeptidase enhancer 2	B3KQT8_HUMAN	CUB_154_268	154	268	DOMAINS	114	6	1	2	7	6	10	-0.0438596	0.6486	3	8	YDYVAVFNGGEVNDAR YDYVAVFNGGEVNDAR YDYVAVFNGGEVNDAR	YDYVAVFNGGEVNDAR YDYVAVFNGGEVNDAR YDYVAVFNGGEVNDAR	6	2	2	8	4	6
N/A	cDNA PSEC0172 fis; clone PLACE1011835; highly similar to Procollagen C-endopeptidase enhancer 2	B3KQT8_HUMAN	NTR	297	415	DOMAINS	118	73	77	64	76	79	73	-0.0423729	0.6486	71	76	DGSLHATVSIINIYK EGNLAIQQAGK GLNYIIMGQVGEDGR IMPNSFIMMFK TGTLEGNYCSSDFVLAGTVITTITR DGSLHATVSIINIYK GLNYIIMGQVGEDGR IMPNSFIMMFK TGTLEGNYCSSDFVLAGTVITTITR DGSLHATVSIINIYK EGNLAIQQAGK GLNYIIMGQVGEDGR TGTLEGNYCSSDFVLAGTVITTITR	DGSLHATVSIINIYK EGNLAIQQAGK GLNYIIMGQVGEDGR IMPNSFIMMFK TGTLEGNYCSSDFVLAGTVITTITR DGSLHATVSIINIYK GLNYIIMGQVGEDGR TGTLEGNYCSSDFVLAGTVITTITR EGNLAIQQAGK GLNYIIMGQVGEDGR	74	106	54	90	50	46
N/A	cDNA PSEC0172 fis; clone PLACE1011835; highly similar to Procollagen C-endopeptidase enhancer 2	B3KQT8_HUMAN	50Step_Domain_p0_to_50	0	50	50.0 AA STEP	50	0	0	0	0	0	0	0	1	0	0			0	0	0	0	0	0
N/A	cDNA PSEC0172 fis; clone PLACE1011835; highly similar to Procollagen C-endopeptidase enhancer 2	B3KQT8_HUMAN	50Step_Domain_p50.0_to_100.0	50	100	50.0 AA STEP	50	16	16	28	12	10	13	0.16	0.2826	20	12	FIDLESDNLCR YDFVDVYNGHANGQR FIDLESDNLCR FIDLESDNLCR	FIDLESDNLCR FIDLESDNLCR FIDLESDNLCR	16	22	24	14	6	8
N/A	cDNA PSEC0172 fis; clone PLACE1011835; highly similar to Procollagen C-endopeptidase enhancer 2	B3KQT8_HUMAN	50Step_Domain_p100.0_to_150.0	100	150	50.0 AA STEP	50	2	0	0	0	0	0	0.02	1	1	0	YDFVDVYNGHANGQR		2	0	0	0	0	0
N/A	cDNA PSEC0172 fis; clone PLACE1011835; highly similar to Procollagen C-endopeptidase enhancer 2	B3KQT8_HUMAN	50Step_Domain_p150.0_to_200.0	150	200	50.0 AA STEP	50	0	0	0	0	0	0	0	1	0	0			0	0	0	0	0	0
N/A	cDNA PSEC0172 fis; clone PLACE1011835; highly similar to Procollagen C-endopeptidase enhancer 2	B3KQT8_HUMAN	50Step_Domain_p200.0_to_250.0	200	250	50.0 AA STEP	50	6	1	2	7	6	10	-0.1	1	3	8	YDYVAVFNGGEVNDAR YDYVAVFNGGEVNDAR YDYVAVFNGGEVNDAR	YDYVAVFNGGEVNDAR YDYVAVFNGGEVNDAR YDYVAVFNGGEVNDAR	6	2	2	8	4	6
N/A	cDNA PSEC0172 fis; clone PLACE1011835; highly similar to Procollagen C-endopeptidase enhancer 2	B3KQT8_HUMAN	50Step_Domain_p250.0_to_300.0	250	300	50.0 AA STEP	50	0	0	0	0	0	0	0	1	0	0			0	0	0	0	0	0
N/A	cDNA PSEC0172 fis; clone PLACE1011835; highly similar to Procollagen C-endopeptidase enhancer 2	B3KQT8_HUMAN	50Step_Domain_p300.0_to_350.0	300	350	50.0 AA STEP	50	32	19	14	12	25	10	0.12	1	22	16	DGSLHATVSIINIYK EGNLAIQQAGK TGTLEGNYCSSDFVLAGTVITTITR DGSLHATVSIINIYK TGTLEGNYCSSDFVLAGTVITTITR DGSLHATVSIINIYK EGNLAIQQAGK TGTLEGNYCSSDFVLAGTVITTITR	DGSLHATVSIINIYK EGNLAIQQAGK TGTLEGNYCSSDFVLAGTVITTITR DGSLHATVSIINIYK TGTLEGNYCSSDFVLAGTVITTITR EGNLAIQQAGK	32	26	12	14	16	6
N/A	cDNA PSEC0172 fis; clone PLACE1011835; highly similar to Procollagen C-endopeptidase enhancer 2	B3KQT8_HUMAN	50Step_Domain_p350.0_to_400.0	350	400	50.0 AA STEP	50	44	58	57	68	54	73	-0.24	0.0243	53	65	EGNLAIQQAGK GLNYIIMGQVGEDGR IMPNSFIMMFK GLNYIIMGQVGEDGR IMPNSFIMMFK EGNLAIQQAGK GLNYIIMGQVGEDGR	EGNLAIQQAGK GLNYIIMGQVGEDGR IMPNSFIMMFK GLNYIIMGQVGEDGR EGNLAIQQAGK GLNYIIMGQVGEDGR	44	80	48	80	34	46
N/A	cDNA PSEC0172 fis; clone PLACE1011835; highly similar to Procollagen C-endopeptidase enhancer 2	B3KQT8_HUMAN	50Step_Domain_p400.0_to_415.0	400	415	50.0 AA STEP	15	0	0	0	0	0	0	0	1	0	0			0	0	0	0	0	0
N/A	cDNA PSEC0172 fis; clone PLACE1011835; highly similar to Procollagen C-endopeptidase enhancer 2	B3KQT8_HUMAN	80Step_Domain_p0_to_80	0	80	80.0 AA STEP	80	14	16	28	12	10	13	0.0875	0.1584	19	12	FIDLESDNLCR FIDLESDNLCR FIDLESDNLCR	FIDLESDNLCR FIDLESDNLCR FIDLESDNLCR	14	22	24	14	6	8
N/A	cDNA PSEC0172 fis; clone PLACE1011835; highly similar to Procollagen C-endopeptidase enhancer 2	B3KQT8_HUMAN	80Step_Domain_p80.0_to_160.0	80	160	80.0 AA STEP	80	16	16	28	12	10	13	0.1	0.1002	20	12	FIDLESDNLCR YDFVDVYNGHANGQR FIDLESDNLCR FIDLESDNLCR	FIDLESDNLCR FIDLESDNLCR FIDLESDNLCR	16	22	24	14	6	8
N/A	cDNA PSEC0172 fis; clone PLACE1011835; highly similar to Procollagen C-endopeptidase enhancer 2	B3KQT8_HUMAN	80Step_Domain_p160.0_to_240.0	160	240	80.0 AA STEP	80	6	1	2	7	6	10	-0.0625	0.9762	3	8	YDYVAVFNGGEVNDAR YDYVAVFNGGEVNDAR YDYVAVFNGGEVNDAR	YDYVAVFNGGEVNDAR YDYVAVFNGGEVNDAR YDYVAVFNGGEVNDAR	6	2	2	8	4	6
N/A	cDNA PSEC0172 fis; clone PLACE1011835; highly similar to Procollagen C-endopeptidase enhancer 2	B3KQT8_HUMAN	80Step_Domain_p240.0_to_320.0	240	320	80.0 AA STEP	80	4	6	2	5	6	0	0	1	4	4	TGTLEGNYCSSDFVLAGTVITTITR TGTLEGNYCSSDFVLAGTVITTITR TGTLEGNYCSSDFVLAGTVITTITR	TGTLEGNYCSSDFVLAGTVITTITR TGTLEGNYCSSDFVLAGTVITTITR	4	8	2	6	4	0
N/A	cDNA PSEC0172 fis; clone PLACE1011835; highly similar to Procollagen C-endopeptidase enhancer 2	B3KQT8_HUMAN	80Step_Domain_p320.0_to_400.0	320	400	80.0 AA STEP	80	73	77	64	76	79	73	-0.0625	0.9762	71	76	DGSLHATVSIINIYK EGNLAIQQAGK GLNYIIMGQVGEDGR IMPNSFIMMFK TGTLEGNYCSSDFVLAGTVITTITR DGSLHATVSIINIYK GLNYIIMGQVGEDGR IMPNSFIMMFK TGTLEGNYCSSDFVLAGTVITTITR DGSLHATVSIINIYK EGNLAIQQAGK GLNYIIMGQVGEDGR TGTLEGNYCSSDFVLAGTVITTITR	DGSLHATVSIINIYK EGNLAIQQAGK GLNYIIMGQVGEDGR IMPNSFIMMFK TGTLEGNYCSSDFVLAGTVITTITR DGSLHATVSIINIYK GLNYIIMGQVGEDGR TGTLEGNYCSSDFVLAGTVITTITR EGNLAIQQAGK GLNYIIMGQVGEDGR	74	106	54	90	50	46
N/A	cDNA PSEC0172 fis; clone PLACE1011835; highly similar to Procollagen C-endopeptidase enhancer 2	B3KQT8_HUMAN	80Step_Domain_p400.0_to_415.0	400	415	80.0 AA STEP	15	0	0	0	0	0	0	0	1	0	0			0	0	0	0	0	0
N/A	cDNA PSEC0172 fis; clone PLACE1011835; highly similar to Procollagen C-endopeptidase enhancer 2	B3KQT8_HUMAN	100Step_Domain_p0_to_100	0	100	100.0 AA STEP	100	16	16	28	12	10	13	0.08	0.036	20	12	FIDLESDNLCR YDFVDVYNGHANGQR FIDLESDNLCR FIDLESDNLCR	FIDLESDNLCR FIDLESDNLCR FIDLESDNLCR	16	22	24	14	6	8
N/A	cDNA PSEC0172 fis; clone PLACE1011835; highly similar to Procollagen C-endopeptidase enhancer 2	B3KQT8_HUMAN	100Step_Domain_p100.0_to_200.0	100	200	100.0 AA STEP	100	2	0	0	0	0	0	0.01	1	1	0	YDFVDVYNGHANGQR		2	0	0	0	0	0
N/A	cDNA PSEC0172 fis; clone PLACE1011835; highly similar to Procollagen C-endopeptidase enhancer 2	B3KQT8_HUMAN	100Step_Domain_p200.0_to_300.0	200	300	100.0 AA STEP	100	6	1	2	7	6	10	-0.05	0.547	3	8	YDYVAVFNGGEVNDAR YDYVAVFNGGEVNDAR YDYVAVFNGGEVNDAR	YDYVAVFNGGEVNDAR YDYVAVFNGGEVNDAR YDYVAVFNGGEVNDAR	6	2	2	8	4	6
N/A	cDNA PSEC0172 fis; clone PLACE1011835; highly similar to Procollagen C-endopeptidase enhancer 2	B3KQT8_HUMAN	100Step_Domain_p300.0_to_400.0	300	400	100.0 AA STEP	100	73	77	64	76	79	73	-0.05	0.547	71	76	DGSLHATVSIINIYK EGNLAIQQAGK GLNYIIMGQVGEDGR IMPNSFIMMFK TGTLEGNYCSSDFVLAGTVITTITR DGSLHATVSIINIYK GLNYIIMGQVGEDGR IMPNSFIMMFK TGTLEGNYCSSDFVLAGTVITTITR DGSLHATVSIINIYK EGNLAIQQAGK GLNYIIMGQVGEDGR TGTLEGNYCSSDFVLAGTVITTITR	DGSLHATVSIINIYK EGNLAIQQAGK GLNYIIMGQVGEDGR IMPNSFIMMFK TGTLEGNYCSSDFVLAGTVITTITR DGSLHATVSIINIYK GLNYIIMGQVGEDGR TGTLEGNYCSSDFVLAGTVITTITR EGNLAIQQAGK GLNYIIMGQVGEDGR	74	106	54	90	50	46
N/A	cDNA PSEC0172 fis; clone PLACE1011835; highly similar to Procollagen C-endopeptidase enhancer 2	B3KQT8_HUMAN	100Step_Domain_p400.0_to_415.0	400	415	100.0 AA STEP	15	0	0	0	0	0	0	0	1	0	0			0	0	0	0	0	0
N/A	Procollagen C-endopeptidase enhancer 2 variant	Q53EK6_HUMAN	CUB	33	144	DOMAINS	111	16	16	28	12	10	13	0.0720721	0.114	20	12	FIDLESDNLCR YDFVDVYNGHANGQR FIDLESDNLCR FIDLESDNLCR	FIDLESDNLCR FIDLESDNLCR FIDLESDNLCR	16	22	24	14	6	8
N/A	Procollagen C-endopeptidase enhancer 2 variant	Q53EK6_HUMAN	CUB_154_268	154	268	DOMAINS	114	6	1	2	7	6	10	-0.0438596	0.6486	3	8	YDYVAVFNGGEVNDAR YDYVAVFNGGEVNDAR YDYVAVFNGGEVNDAR	YDYVAVFNGGEVNDAR YDYVAVFNGGEVNDAR YDYVAVFNGGEVNDAR	6	2	2	8	4	6
N/A	Procollagen C-endopeptidase enhancer 2 variant	Q53EK6_HUMAN	NTR	297	415	DOMAINS	118	73	77	64	76	79	73	-0.0423729	0.6486	71	76	DGSLHATVSIINIYK EGNLAIQQAGK GLNYIIMGQVGEDGR IMPNSFIMMFK TGTLEGNYCSSDFVLAGTVITTITR DGSLHATVSIINIYK GLNYIIMGQVGEDGR IMPNSFIMMFK TGTLEGNYCSSDFVLAGTVITTITR DGSLHATVSIINIYK EGNLAIQQAGK GLNYIIMGQVGEDGR TGTLEGNYCSSDFVLAGTVITTITR	DGSLHATVSIINIYK EGNLAIQQAGK GLNYIIMGQVGEDGR IMPNSFIMMFK TGTLEGNYCSSDFVLAGTVITTITR DGSLHATVSIINIYK GLNYIIMGQVGEDGR TGTLEGNYCSSDFVLAGTVITTITR EGNLAIQQAGK GLNYIIMGQVGEDGR	74	106	54	90	50	46
N/A	Procollagen C-endopeptidase enhancer 2 variant	Q53EK6_HUMAN	50Step_Domain_p0_to_50	0	50	50.0 AA STEP	50	0	0	0	0	0	0	0	1	0	0			0	0	0	0	0	0
N/A	Procollagen C-endopeptidase enhancer 2 variant	Q53EK6_HUMAN	50Step_Domain_p50.0_to_100.0	50	100	50.0 AA STEP	50	16	16	28	12	10	13	0.16	0.2826	20	12	FIDLESDNLCR YDFVDVYNGHANGQR FIDLESDNLCR FIDLESDNLCR	FIDLESDNLCR FIDLESDNLCR FIDLESDNLCR	16	22	24	14	6	8
N/A	Procollagen C-endopeptidase enhancer 2 variant	Q53EK6_HUMAN	50Step_Domain_p100.0_to_150.0	100	150	50.0 AA STEP	50	2	0	0	0	0	0	0.02	1	1	0	YDFVDVYNGHANGQR		2	0	0	0	0	0
N/A	Procollagen C-endopeptidase enhancer 2 variant	Q53EK6_HUMAN	50Step_Domain_p150.0_to_200.0	150	200	50.0 AA STEP	50	0	0	0	0	0	0	0	1	0	0			0	0	0	0	0	0
N/A	Procollagen C-endopeptidase enhancer 2 variant	Q53EK6_HUMAN	50Step_Domain_p200.0_to_250.0	200	250	50.0 AA STEP	50	6	1	2	7	6	10	-0.1	1	3	8	YDYVAVFNGGEVNDAR YDYVAVFNGGEVNDAR YDYVAVFNGGEVNDAR	YDYVAVFNGGEVNDAR YDYVAVFNGGEVNDAR YDYVAVFNGGEVNDAR	6	2	2	8	4	6
N/A	Procollagen C-endopeptidase enhancer 2 variant	Q53EK6_HUMAN	50Step_Domain_p250.0_to_300.0	250	300	50.0 AA STEP	50	0	0	0	0	0	0	0	1	0	0			0	0	0	0	0	0
N/A	Procollagen C-endopeptidase enhancer 2 variant	Q53EK6_HUMAN	50Step_Domain_p300.0_to_350.0	300	350	50.0 AA STEP	50	32	19	14	12	25	10	0.12	1	22	16	DGSLHATVSIINIYK EGNLAIQQAGK TGTLEGNYCSSDFVLAGTVITTITR DGSLHATVSIINIYK TGTLEGNYCSSDFVLAGTVITTITR DGSLHATVSIINIYK EGNLAIQQAGK TGTLEGNYCSSDFVLAGTVITTITR	DGSLHATVSIINIYK EGNLAIQQAGK TGTLEGNYCSSDFVLAGTVITTITR DGSLHATVSIINIYK TGTLEGNYCSSDFVLAGTVITTITR EGNLAIQQAGK	32	26	12	14	16	6
N/A	Procollagen C-endopeptidase enhancer 2 variant	Q53EK6_HUMAN	50Step_Domain_p350.0_to_400.0	350	400	50.0 AA STEP	50	44	58	57	68	54	73	-0.24	0.0243	53	65	EGNLAIQQAGK GLNYIIMGQVGEDGR IMPNSFIMMFK GLNYIIMGQVGEDGR IMPNSFIMMFK EGNLAIQQAGK GLNYIIMGQVGEDGR	EGNLAIQQAGK GLNYIIMGQVGEDGR IMPNSFIMMFK GLNYIIMGQVGEDGR EGNLAIQQAGK GLNYIIMGQVGEDGR	44	80	48	80	34	46
N/A	Procollagen C-endopeptidase enhancer 2 variant	Q53EK6_HUMAN	50Step_Domain_p400.0_to_415.0	400	415	50.0 AA STEP	15	0	0	0	0	0	0	0	1	0	0			0	0	0	0	0	0
N/A	Procollagen C-endopeptidase enhancer 2 variant	Q53EK6_HUMAN	80Step_Domain_p0_to_80	0	80	80.0 AA STEP	80	14	16	28	12	10	13	0.0875	0.1584	19	12	FIDLESDNLCR FIDLESDNLCR FIDLESDNLCR	FIDLESDNLCR FIDLESDNLCR FIDLESDNLCR	14	22	24	14	6	8
N/A	Procollagen C-endopeptidase enhancer 2 variant	Q53EK6_HUMAN	80Step_Domain_p80.0_to_160.0	80	160	80.0 AA STEP	80	16	16	28	12	10	13	0.1	0.1002	20	12	FIDLESDNLCR YDFVDVYNGHANGQR FIDLESDNLCR FIDLESDNLCR	FIDLESDNLCR FIDLESDNLCR FIDLESDNLCR	16	22	24	14	6	8
N/A	Procollagen C-endopeptidase enhancer 2 variant	Q53EK6_HUMAN	80Step_Domain_p160.0_to_240.0	160	240	80.0 AA STEP	80	6	1	2	7	6	10	-0.0625	0.9762	3	8	YDYVAVFNGGEVNDAR YDYVAVFNGGEVNDAR YDYVAVFNGGEVNDAR	YDYVAVFNGGEVNDAR YDYVAVFNGGEVNDAR YDYVAVFNGGEVNDAR	6	2	2	8	4	6
N/A	Procollagen C-endopeptidase enhancer 2 variant	Q53EK6_HUMAN	80Step_Domain_p240.0_to_320.0	240	320	80.0 AA STEP	80	4	6	2	5	6	0	0	1	4	4	TGTLEGNYCSSDFVLAGTVITTITR TGTLEGNYCSSDFVLAGTVITTITR TGTLEGNYCSSDFVLAGTVITTITR	TGTLEGNYCSSDFVLAGTVITTITR TGTLEGNYCSSDFVLAGTVITTITR	4	8	2	6	4	0
N/A	Procollagen C-endopeptidase enhancer 2 variant	Q53EK6_HUMAN	80Step_Domain_p320.0_to_400.0	320	400	80.0 AA STEP	80	73	77	64	76	79	73	-0.0625	0.9762	71	76	DGSLHATVSIINIYK EGNLAIQQAGK GLNYIIMGQVGEDGR IMPNSFIMMFK TGTLEGNYCSSDFVLAGTVITTITR DGSLHATVSIINIYK GLNYIIMGQVGEDGR IMPNSFIMMFK TGTLEGNYCSSDFVLAGTVITTITR DGSLHATVSIINIYK EGNLAIQQAGK GLNYIIMGQVGEDGR TGTLEGNYCSSDFVLAGTVITTITR	DGSLHATVSIINIYK EGNLAIQQAGK GLNYIIMGQVGEDGR IMPNSFIMMFK TGTLEGNYCSSDFVLAGTVITTITR DGSLHATVSIINIYK GLNYIIMGQVGEDGR TGTLEGNYCSSDFVLAGTVITTITR EGNLAIQQAGK GLNYIIMGQVGEDGR	74	106	54	90	50	46
N/A	Procollagen C-endopeptidase enhancer 2 variant	Q53EK6_HUMAN	80Step_Domain_p400.0_to_415.0	400	415	80.0 AA STEP	15	0	0	0	0	0	0	0	1	0	0			0	0	0	0	0	0
N/A	Procollagen C-endopeptidase enhancer 2 variant	Q53EK6_HUMAN	100Step_Domain_p0_to_100	0	100	100.0 AA STEP	100	16	16	28	12	10	13	0.08	0.036	20	12	FIDLESDNLCR YDFVDVYNGHANGQR FIDLESDNLCR FIDLESDNLCR	FIDLESDNLCR FIDLESDNLCR FIDLESDNLCR	16	22	24	14	6	8
N/A	Procollagen C-endopeptidase enhancer 2 variant	Q53EK6_HUMAN	100Step_Domain_p100.0_to_200.0	100	200	100.0 AA STEP	100	2	0	0	0	0	0	0.01	1	1	0	YDFVDVYNGHANGQR		2	0	0	0	0	0
N/A	Procollagen C-endopeptidase enhancer 2 variant	Q53EK6_HUMAN	100Step_Domain_p200.0_to_300.0	200	300	100.0 AA STEP	100	6	1	2	7	6	10	-0.05	0.547	3	8	YDYVAVFNGGEVNDAR YDYVAVFNGGEVNDAR YDYVAVFNGGEVNDAR	YDYVAVFNGGEVNDAR YDYVAVFNGGEVNDAR YDYVAVFNGGEVNDAR	6	2	2	8	4	6
N/A	Procollagen C-endopeptidase enhancer 2 variant	Q53EK6_HUMAN	100Step_Domain_p300.0_to_400.0	300	400	100.0 AA STEP	100	73	77	64	76	79	73	-0.05	0.547	71	76	DGSLHATVSIINIYK EGNLAIQQAGK GLNYIIMGQVGEDGR IMPNSFIMMFK TGTLEGNYCSSDFVLAGTVITTITR DGSLHATVSIINIYK GLNYIIMGQVGEDGR IMPNSFIMMFK TGTLEGNYCSSDFVLAGTVITTITR DGSLHATVSIINIYK EGNLAIQQAGK GLNYIIMGQVGEDGR TGTLEGNYCSSDFVLAGTVITTITR	DGSLHATVSIINIYK EGNLAIQQAGK GLNYIIMGQVGEDGR IMPNSFIMMFK TGTLEGNYCSSDFVLAGTVITTITR DGSLHATVSIINIYK GLNYIIMGQVGEDGR TGTLEGNYCSSDFVLAGTVITTITR EGNLAIQQAGK GLNYIIMGQVGEDGR	74	106	54	90	50	46
N/A	Procollagen C-endopeptidase enhancer 2 variant	Q53EK6_HUMAN	100Step_Domain_p400.0_to_415.0	400	415	100.0 AA STEP	15	0	0	0	0	0	0	0	1	0	0			0	0	0	0	0	0
PCOLCE2	Procollagen C-endopeptidase enhancer 2	PCOC2_HUMAN	CUB 1	33	144	DOMAINS	111	16	16	28	12	10	13	0.0720721	0.114	20	12	FIDLESDNLCR YDFVDVYNGHANGQR FIDLESDNLCR FIDLESDNLCR	FIDLESDNLCR FIDLESDNLCR FIDLESDNLCR	16	22	24	14	6	8
PCOLCE2	Procollagen C-endopeptidase enhancer 2	PCOC2_HUMAN	CUB 2	154	268	DOMAINS	114	6	1	2	7	6	10	-0.0438596	0.6486	3	8	YDYVAVFNGGEVNDAR YDYVAVFNGGEVNDAR YDYVAVFNGGEVNDAR	YDYVAVFNGGEVNDAR YDYVAVFNGGEVNDAR YDYVAVFNGGEVNDAR	6	2	2	8	4	6
PCOLCE2	Procollagen C-endopeptidase enhancer 2	PCOC2_HUMAN	NTR	297	415	DOMAINS	118	73	77	64	76	79	73	-0.0423729	0.6486	71	76	DGSLHATVSIINIYK EGNLAIQQAGK GLNYIIMGQVGEDGR IMPNSFIMMFK TGTLEGNYCSSDFVLAGTVITTITR DGSLHATVSIINIYK GLNYIIMGQVGEDGR IMPNSFIMMFK TGTLEGNYCSSDFVLAGTVITTITR DGSLHATVSIINIYK EGNLAIQQAGK GLNYIIMGQVGEDGR TGTLEGNYCSSDFVLAGTVITTITR	DGSLHATVSIINIYK EGNLAIQQAGK GLNYIIMGQVGEDGR IMPNSFIMMFK TGTLEGNYCSSDFVLAGTVITTITR DGSLHATVSIINIYK GLNYIIMGQVGEDGR TGTLEGNYCSSDFVLAGTVITTITR EGNLAIQQAGK GLNYIIMGQVGEDGR	74	106	54	90	50	46
PCOLCE2	Procollagen C-endopeptidase enhancer 2	PCOC2_HUMAN	50Step_Domain_p0_to_50	0	50	50.0 AA STEP	50	0	0	0	0	0	0	0	1	0	0			0	0	0	0	0	0
PCOLCE2	Procollagen C-endopeptidase enhancer 2	PCOC2_HUMAN	50Step_Domain_p50.0_to_100.0	50	100	50.0 AA STEP	50	16	16	28	12	10	13	0.16	0.2826	20	12	FIDLESDNLCR YDFVDVYNGHANGQR FIDLESDNLCR FIDLESDNLCR	FIDLESDNLCR FIDLESDNLCR FIDLESDNLCR	16	22	24	14	6	8
PCOLCE2	Procollagen C-endopeptidase enhancer 2	PCOC2_HUMAN	50Step_Domain_p100.0_to_150.0	100	150	50.0 AA STEP	50	2	0	0	0	0	0	0.02	1	1	0	YDFVDVYNGHANGQR		2	0	0	0	0	0
PCOLCE2	Procollagen C-endopeptidase enhancer 2	PCOC2_HUMAN	50Step_Domain_p150.0_to_200.0	150	200	50.0 AA STEP	50	0	0	0	0	0	0	0	1	0	0			0	0	0	0	0	0
PCOLCE2	Procollagen C-endopeptidase enhancer 2	PCOC2_HUMAN	50Step_Domain_p200.0_to_250.0	200	250	50.0 AA STEP	50	6	1	2	7	6	10	-0.1	1	3	8	YDYVAVFNGGEVNDAR YDYVAVFNGGEVNDAR YDYVAVFNGGEVNDAR	YDYVAVFNGGEVNDAR YDYVAVFNGGEVNDAR YDYVAVFNGGEVNDAR	6	2	2	8	4	6
PCOLCE2	Procollagen C-endopeptidase enhancer 2	PCOC2_HUMAN	50Step_Domain_p250.0_to_300.0	250	300	50.0 AA STEP	50	0	0	0	0	0	0	0	1	0	0			0	0	0	0	0	0
PCOLCE2	Procollagen C-endopeptidase enhancer 2	PCOC2_HUMAN	50Step_Domain_p300.0_to_350.0	300	350	50.0 AA STEP	50	32	19	14	12	25	10	0.12	1	22	16	DGSLHATVSIINIYK EGNLAIQQAGK TGTLEGNYCSSDFVLAGTVITTITR DGSLHATVSIINIYK TGTLEGNYCSSDFVLAGTVITTITR DGSLHATVSIINIYK EGNLAIQQAGK TGTLEGNYCSSDFVLAGTVITTITR	DGSLHATVSIINIYK EGNLAIQQAGK TGTLEGNYCSSDFVLAGTVITTITR DGSLHATVSIINIYK TGTLEGNYCSSDFVLAGTVITTITR EGNLAIQQAGK	32	26	12	14	16	6
PCOLCE2	Procollagen C-endopeptidase enhancer 2	PCOC2_HUMAN	50Step_Domain_p350.0_to_400.0	350	400	50.0 AA STEP	50	44	58	57	68	54	73	-0.24	0.0243	53	65	EGNLAIQQAGK GLNYIIMGQVGEDGR IMPNSFIMMFK GLNYIIMGQVGEDGR IMPNSFIMMFK EGNLAIQQAGK GLNYIIMGQVGEDGR	EGNLAIQQAGK GLNYIIMGQVGEDGR IMPNSFIMMFK GLNYIIMGQVGEDGR EGNLAIQQAGK GLNYIIMGQVGEDGR	44	80	48	80	34	46
PCOLCE2	Procollagen C-endopeptidase enhancer 2	PCOC2_HUMAN	50Step_Domain_p400.0_to_415.0	400	415	50.0 AA STEP	15	0	0	0	0	0	0	0	1	0	0			0	0	0	0	0	0
PCOLCE2	Procollagen C-endopeptidase enhancer 2	PCOC2_HUMAN	80Step_Domain_p0_to_80	0	80	80.0 AA STEP	80	14	16	28	12	10	13	0.0875	0.1584	19	12	FIDLESDNLCR FIDLESDNLCR FIDLESDNLCR	FIDLESDNLCR FIDLESDNLCR FIDLESDNLCR	14	22	24	14	6	8
PCOLCE2	Procollagen C-endopeptidase enhancer 2	PCOC2_HUMAN	80Step_Domain_p80.0_to_160.0	80	160	80.0 AA STEP	80	16	16	28	12	10	13	0.1	0.1002	20	12	FIDLESDNLCR YDFVDVYNGHANGQR FIDLESDNLCR FIDLESDNLCR	FIDLESDNLCR FIDLESDNLCR FIDLESDNLCR	16	22	24	14	6	8
PCOLCE2	Procollagen C-endopeptidase enhancer 2	PCOC2_HUMAN	80Step_Domain_p160.0_to_240.0	160	240	80.0 AA STEP	80	6	1	2	7	6	10	-0.0625	0.9762	3	8	YDYVAVFNGGEVNDAR YDYVAVFNGGEVNDAR YDYVAVFNGGEVNDAR	YDYVAVFNGGEVNDAR YDYVAVFNGGEVNDAR YDYVAVFNGGEVNDAR	6	2	2	8	4	6
PCOLCE2	Procollagen C-endopeptidase enhancer 2	PCOC2_HUMAN	80Step_Domain_p240.0_to_320.0	240	320	80.0 AA STEP	80	4	6	2	5	6	0	0	1	4	4	TGTLEGNYCSSDFVLAGTVITTITR TGTLEGNYCSSDFVLAGTVITTITR TGTLEGNYCSSDFVLAGTVITTITR	TGTLEGNYCSSDFVLAGTVITTITR TGTLEGNYCSSDFVLAGTVITTITR	4	8	2	6	4	0
PCOLCE2	Procollagen C-endopeptidase enhancer 2	PCOC2_HUMAN	80Step_Domain_p320.0_to_400.0	320	400	80.0 AA STEP	80	73	77	64	76	79	73	-0.0625	0.9762	71	76	DGSLHATVSIINIYK EGNLAIQQAGK GLNYIIMGQVGEDGR IMPNSFIMMFK TGTLEGNYCSSDFVLAGTVITTITR DGSLHATVSIINIYK GLNYIIMGQVGEDGR IMPNSFIMMFK TGTLEGNYCSSDFVLAGTVITTITR DGSLHATVSIINIYK EGNLAIQQAGK GLNYIIMGQVGEDGR TGTLEGNYCSSDFVLAGTVITTITR	DGSLHATVSIINIYK EGNLAIQQAGK GLNYIIMGQVGEDGR IMPNSFIMMFK TGTLEGNYCSSDFVLAGTVITTITR DGSLHATVSIINIYK GLNYIIMGQVGEDGR TGTLEGNYCSSDFVLAGTVITTITR EGNLAIQQAGK GLNYIIMGQVGEDGR	74	106	54	90	50	46
PCOLCE2	Procollagen C-endopeptidase enhancer 2	PCOC2_HUMAN	80Step_Domain_p400.0_to_415.0	400	415	80.0 AA STEP	15	0	0	0	0	0	0	0	1	0	0			0	0	0	0	0	0
PCOLCE2	Procollagen C-endopeptidase enhancer 2	PCOC2_HUMAN	100Step_Domain_p0_to_100	0	100	100.0 AA STEP	100	16	16	28	12	10	13	0.08	0.036	20	12	FIDLESDNLCR YDFVDVYNGHANGQR FIDLESDNLCR FIDLESDNLCR	FIDLESDNLCR FIDLESDNLCR FIDLESDNLCR	16	22	24	14	6	8
PCOLCE2	Procollagen C-endopeptidase enhancer 2	PCOC2_HUMAN	100Step_Domain_p100.0_to_200.0	100	200	100.0 AA STEP	100	2	0	0	0	0	0	0.01	1	1	0	YDFVDVYNGHANGQR		2	0	0	0	0	0
PCOLCE2	Procollagen C-endopeptidase enhancer 2	PCOC2_HUMAN	100Step_Domain_p200.0_to_300.0	200	300	100.0 AA STEP	100	6	1	2	7	6	10	-0.05	0.547	3	8	YDYVAVFNGGEVNDAR YDYVAVFNGGEVNDAR YDYVAVFNGGEVNDAR	YDYVAVFNGGEVNDAR YDYVAVFNGGEVNDAR YDYVAVFNGGEVNDAR	6	2	2	8	4	6
PCOLCE2	Procollagen C-endopeptidase enhancer 2	PCOC2_HUMAN	100Step_Domain_p300.0_to_400.0	300	400	100.0 AA STEP	100	73	77	64	76	79	73	-0.05	0.547	71	76	DGSLHATVSIINIYK EGNLAIQQAGK GLNYIIMGQVGEDGR IMPNSFIMMFK TGTLEGNYCSSDFVLAGTVITTITR DGSLHATVSIINIYK GLNYIIMGQVGEDGR IMPNSFIMMFK TGTLEGNYCSSDFVLAGTVITTITR DGSLHATVSIINIYK EGNLAIQQAGK GLNYIIMGQVGEDGR TGTLEGNYCSSDFVLAGTVITTITR	DGSLHATVSIINIYK EGNLAIQQAGK GLNYIIMGQVGEDGR IMPNSFIMMFK TGTLEGNYCSSDFVLAGTVITTITR DGSLHATVSIINIYK GLNYIIMGQVGEDGR TGTLEGNYCSSDFVLAGTVITTITR EGNLAIQQAGK GLNYIIMGQVGEDGR	74	106	54	90	50	46
PCOLCE2	Procollagen C-endopeptidase enhancer 2	PCOC2_HUMAN	100Step_Domain_p400.0_to_415.0	400	415	100.0 AA STEP	15	0	0	0	0	0	0	0	1	0	0			0	0	0	0	0	0
N/A	cDNA FLJ14473 fis; clone MAMMA1001080; highly similar to Homo sapiens SNC73 protein (SNC73) mRNA	Q96K68_HUMAN	Ig-like	31	115	DOMAINS	84	0	0	0	0	0	0	0	1	0	0			0	0	0	0	0	0
N/A	cDNA FLJ14473 fis; clone MAMMA1001080; highly similar to Homo sapiens SNC73 protein (SNC73) mRNA	Q96K68_HUMAN	Ig-like_147_239	147	239	DOMAINS	92	0	0	0	0	0	0	0	1	0	0			0	0	0	0	0	0
N/A	cDNA FLJ14473 fis; clone MAMMA1001080; highly similar to Homo sapiens SNC73 protein (SNC73) mRNA	Q96K68_HUMAN	Ig-like_266_361	266	361	DOMAINS	95	5	8	10	0	10	0	0.0526316	0.4288	8	3	DASGVTFTWTPSSGK TPLTATLSK DASGVTFTWTPSSGK DASGVTFTWTPSSGK TPLTATLSK	DASGVTFTWTPSSGK	10	4	6	0	2	0
N/A	cDNA FLJ14473 fis; clone MAMMA1001080; highly similar to Homo sapiens SNC73 protein (SNC73) mRNA	Q96K68_HUMAN	Ig-like_369_471	369	471	DOMAINS	102	14	11	10	0	10	0	0.0882353	0.0188	12	3	GDTFSCMVGHEALPLAFTQK QEPSQGTTTFAVTSILR QEPSQGTTTFAVTSILR QEPSQGTTTFAVTSILR	QEPSQGTTTFAVTSILR	28	6	6	0	2	0
N/A	cDNA FLJ14473 fis; clone MAMMA1001080; highly similar to Homo sapiens SNC73 protein (SNC73) mRNA	Q96K68_HUMAN	50Step_Domain_p0_to_50	0	50	50.0 AA STEP	50	0	0	0	0	0	0	0	1	0	0			0	0	0	0	0	0
N/A	cDNA FLJ14473 fis; clone MAMMA1001080; highly similar to Homo sapiens SNC73 protein (SNC73) mRNA	Q96K68_HUMAN	50Step_Domain_p50.0_to_100.0	50	100	50.0 AA STEP	50	0	0	0	0	0	0	0	1	0	0			0	0	0	0	0	0
N/A	cDNA FLJ14473 fis; clone MAMMA1001080; highly similar to Homo sapiens SNC73 protein (SNC73) mRNA	Q96K68_HUMAN	50Step_Domain_p100.0_to_150.0	100	150	50.0 AA STEP	50	0	0	0	0	0	0	0	1	0	0			0	0	0	0	0	0
N/A	cDNA FLJ14473 fis; clone MAMMA1001080; highly similar to Homo sapiens SNC73 protein (SNC73) mRNA	Q96K68_HUMAN	50Step_Domain_p150.0_to_200.0	150	200	50.0 AA STEP	50	0	0	0	0	0	0	0	1	0	0			0	0	0	0	0	0
N/A	cDNA FLJ14473 fis; clone MAMMA1001080; highly similar to Homo sapiens SNC73 protein (SNC73) mRNA	Q96K68_HUMAN	50Step_Domain_p200.0_to_250.0	200	250	50.0 AA STEP	50	0	0	0	0	0	0	0	1	0	0			0	0	0	0	0	0
N/A	cDNA FLJ14473 fis; clone MAMMA1001080; highly similar to Homo sapiens SNC73 protein (SNC73) mRNA	Q96K68_HUMAN	50Step_Domain_p250.0_to_300.0	250	300	50.0 AA STEP	50	3	8	3	0	10	0	0.04	1	5	3	DASGVTFTWTPSSGK DASGVTFTWTPSSGK DASGVTFTWTPSSGK	DASGVTFTWTPSSGK	6	4	2	0	2	0
N/A	cDNA FLJ14473 fis; clone MAMMA1001080; highly similar to Homo sapiens SNC73 protein (SNC73) mRNA	Q96K68_HUMAN	50Step_Domain_p300.0_to_350.0	300	350	50.0 AA STEP	50	3	8	3	0	10	0	0.04	1	5	3	DASGVTFTWTPSSGK DASGVTFTWTPSSGK DASGVTFTWTPSSGK	DASGVTFTWTPSSGK	6	4	2	0	2	0
N/A	cDNA FLJ14473 fis; clone MAMMA1001080; highly similar to Homo sapiens SNC73 protein (SNC73) mRNA	Q96K68_HUMAN	50Step_Domain_p350.0_to_400.0	350	400	50.0 AA STEP	50	2	0	6	0	0	0	0.06	1	3	0	TPLTATLSK TPLTATLSK		4	0	4	0	0	0
N/A	cDNA FLJ14473 fis; clone MAMMA1001080; highly similar to Homo sapiens SNC73 protein (SNC73) mRNA	Q96K68_HUMAN	50Step_Domain_p400.0_to_450.0	400	450	50.0 AA STEP	50	14	11	10	0	10	0	0.18	0.003	12	3	GDTFSCMVGHEALPLAFTQK QEPSQGTTTFAVTSILR QEPSQGTTTFAVTSILR QEPSQGTTTFAVTSILR	QEPSQGTTTFAVTSILR	28	6	6	0	2	0
N/A	cDNA FLJ14473 fis; clone MAMMA1001080; highly similar to Homo sapiens SNC73 protein (SNC73) mRNA	Q96K68_HUMAN	50Step_Domain_p450.0_to_494.0	450	494	50.0 AA STEP	44	2	0	0	0	0	0	0.0227273	1	1	0	GDTFSCMVGHEALPLAFTQK		4	0	0	0	0	0
N/A	cDNA FLJ14473 fis; clone MAMMA1001080; highly similar to Homo sapiens SNC73 protein (SNC73) mRNA	Q96K68_HUMAN	80Step_Domain_p0_to_80	0	80	80.0 AA STEP	80	0	0	0	0	0	0	0	1	0	0			0	0	0	0	0	0
N/A	cDNA FLJ14473 fis; clone MAMMA1001080; highly similar to Homo sapiens SNC73 protein (SNC73) mRNA	Q96K68_HUMAN	80Step_Domain_p80.0_to_160.0	80	160	80.0 AA STEP	80	0	0	0	0	0	0	0	1	0	0			0	0	0	0	0	0
N/A	cDNA FLJ14473 fis; clone MAMMA1001080; highly similar to Homo sapiens SNC73 protein (SNC73) mRNA	Q96K68_HUMAN	80Step_Domain_p160.0_to_240.0	160	240	80.0 AA STEP	80	0	0	0	0	0	0	0	1	0	0			0	0	0	0	0	0
N/A	cDNA FLJ14473 fis; clone MAMMA1001080; highly similar to Homo sapiens SNC73 protein (SNC73) mRNA	Q96K68_HUMAN	80Step_Domain_p240.0_to_320.0	240	320	80.0 AA STEP	80	3	8	3	0	10	0	0.025	1	5	3	DASGVTFTWTPSSGK DASGVTFTWTPSSGK DASGVTFTWTPSSGK	DASGVTFTWTPSSGK	6	4	2	0	2	0
N/A	cDNA FLJ14473 fis; clone MAMMA1001080; highly similar to Homo sapiens SNC73 protein (SNC73) mRNA	Q96K68_HUMAN	80Step_Domain_p320.0_to_400.0	320	400	80.0 AA STEP	80	2	0	6	0	0	0	0.0375	1	3	0	TPLTATLSK TPLTATLSK		4	0	4	0	0	0
N/A	cDNA FLJ14473 fis; clone MAMMA1001080; highly similar to Homo sapiens SNC73 protein (SNC73) mRNA	Q96K68_HUMAN	80Step_Domain_p400.0_to_480.0	400	480	80.0 AA STEP	80	14	11	10	0	10	0	0.1125	0.0028	12	3	GDTFSCMVGHEALPLAFTQK QEPSQGTTTFAVTSILR QEPSQGTTTFAVTSILR QEPSQGTTTFAVTSILR	QEPSQGTTTFAVTSILR	28	6	6	0	2	0
N/A	cDNA FLJ14473 fis; clone MAMMA1001080; highly similar to Homo sapiens SNC73 protein (SNC73) mRNA	Q96K68_HUMAN	80Step_Domain_p480.0_to_494.0	480	494	80.0 AA STEP	14	0	0	0	0	0	0	0	1	0	0			0	0	0	0	0	0
N/A	cDNA FLJ14473 fis; clone MAMMA1001080; highly similar to Homo sapiens SNC73 protein (SNC73) mRNA	Q96K68_HUMAN	100Step_Domain_p0_to_100	0	100	100.0 AA STEP	100	0	0	0	0	0	0	0	1	0	0			0	0	0	0	0	0
N/A	cDNA FLJ14473 fis; clone MAMMA1001080; highly similar to Homo sapiens SNC73 protein (SNC73) mRNA	Q96K68_HUMAN	100Step_Domain_p100.0_to_200.0	100	200	100.0 AA STEP	100	0	0	0	0	0	0	0	1	0	0			0	0	0	0	0	0
N/A	cDNA FLJ14473 fis; clone MAMMA1001080; highly similar to Homo sapiens SNC73 protein (SNC73) mRNA	Q96K68_HUMAN	100Step_Domain_p200.0_to_300.0	200	300	100.0 AA STEP	100	3	8	3	0	10	0	0.02	1	5	3	DASGVTFTWTPSSGK DASGVTFTWTPSSGK DASGVTFTWTPSSGK	DASGVTFTWTPSSGK	6	4	2	0	2	0
N/A	cDNA FLJ14473 fis; clone MAMMA1001080; highly similar to Homo sapiens SNC73 protein (SNC73) mRNA	Q96K68_HUMAN	100Step_Domain_p300.0_to_400.0	300	400	100.0 AA STEP	100	5	8	10	0	10	0	0.05	0.698	8	3	DASGVTFTWTPSSGK TPLTATLSK DASGVTFTWTPSSGK DASGVTFTWTPSSGK TPLTATLSK	DASGVTFTWTPSSGK	10	4	6	0	2	0
N/A	cDNA FLJ14473 fis; clone MAMMA1001080; highly similar to Homo sapiens SNC73 protein (SNC73) mRNA	Q96K68_HUMAN	100Step_Domain_p400.0_to_494.0	400	494	100.0 AA STEP	94	14	11	10	0	10	0	0.0957447	0.039	12	3	GDTFSCMVGHEALPLAFTQK QEPSQGTTTFAVTSILR QEPSQGTTTFAVTSILR QEPSQGTTTFAVTSILR	QEPSQGTTTFAVTSILR	28	6	6	0	2	0
N/A	Immunoglobulin delta heavy chain	IGD_HUMAN	Ig-like 1	1	97	DOMAINS	96	2	3	0	0	0	0	0.0208333	1	2	0	VTISVDTSR VTISVDTSR		4	2	0	0	0	0
N/A	Immunoglobulin delta heavy chain	IGD_HUMAN	Ig-like 2	135	227	DOMAINS	92	2	0	0	0	0	0	0.0108696	1	1	0	DSYYMTSSQLSTPLQQWR		4	0	0	0	0	0
N/A	Immunoglobulin delta heavy chain	IGD_HUMAN	Ig-like 3	304	392	DOMAINS	88	4	9	0	0	0	0	0.0454545	0.0544	4	0	DAHLTWEVAGK VPTGGVEEGLLER DAHLTWEVAGK VPTGGVEEGLLER		8	6	0	0	0	0
N/A	Immunoglobulin delta heavy chain	IGD_HUMAN	Ig-like 4	396	502	DOMAINS	106	4	0	0	0	0	0	0.00943396	1	1	0	SLEVSYVTDHGPM		8	0	0	0	0	0
N/A	Immunoglobulin delta heavy chain	IGD_HUMAN	50Step_Domain_p0_to_50	0	50	50.0 AA STEP	50	0	0	0	0	0	0	0	1	0	0			0	0	0	0	0	0
N/A	Immunoglobulin delta heavy chain	IGD_HUMAN	50Step_Domain_p50.0_to_100.0	50	100	50.0 AA STEP	50	2	3	0	0	0	0	0.04	1	2	0	VTISVDTSR VTISVDTSR		4	2	0	0	0	0
N/A	Immunoglobulin delta heavy chain	IGD_HUMAN	50Step_Domain_p100.0_to_150.0	100	150	50.0 AA STEP	50	0	0	0	0	0	0	0	1	0	0			0	0	0	0	0	0
N/A	Immunoglobulin delta heavy chain	IGD_HUMAN	50Step_Domain_p150.0_to_200.0	150	200	50.0 AA STEP	50	2	0	0	0	0	0	0.02	1	1	0	DSYYMTSSQLSTPLQQWR		4	0	0	0	0	0
N/A	Immunoglobulin delta heavy chain	IGD_HUMAN	50Step_Domain_p200.0_to_250.0	200	250	50.0 AA STEP	50	2	0	0	0	0	0	0.02	1	1	0	DSYYMTSSQLSTPLQQWR		4	0	0	0	0	0
N/A	Immunoglobulin delta heavy chain	IGD_HUMAN	50Step_Domain_p250.0_to_300.0	250	300	50.0 AA STEP	50	0	0	0	0	0	0	0	1	0	0			0	0	0	0	0	0
N/A	Immunoglobulin delta heavy chain	IGD_HUMAN	50Step_Domain_p300.0_to_350.0	300	350	50.0 AA STEP	50	4	9	0	0	0	0	0.08	0.0011	4	0	DAHLTWEVAGK VPTGGVEEGLLER DAHLTWEVAGK VPTGGVEEGLLER		8	6	0	0	0	0
N/A	Immunoglobulin delta heavy chain	IGD_HUMAN	50Step_Domain_p350.0_to_400.0	350	400	50.0 AA STEP	50	1	3	0	0	0	0	0.02	1	1	0	VPTGGVEEGLLER VPTGGVEEGLLER		2	2	0	0	0	0
N/A	Immunoglobulin delta heavy chain	IGD_HUMAN	50Step_Domain_p400.0_to_450.0	400	450	50.0 AA STEP	50	0	0	0	0	0	0	0	1	0	0			0	0	0	0	0	0
N/A	Immunoglobulin delta heavy chain	IGD_HUMAN	50Step_Domain_p450.0_to_500.0	450	500	50.0 AA STEP	50	4	0	0	0	0	0	0.02	1	1	0	SLEVSYVTDHGPM		8	0	0	0	0	0
N/A	Immunoglobulin delta heavy chain	IGD_HUMAN	50Step_Domain_p500.0_to_512.0	500	512	50.0 AA STEP	12	0	0	0	0	0	0	0	1	0	0			0	0	0	0	0	0
N/A	Immunoglobulin delta heavy chain	IGD_HUMAN	80Step_Domain_p0_to_80	0	80	80.0 AA STEP	80	2	3	0	0	0	0	0.025	1	2	0	VTISVDTSR VTISVDTSR		4	2	0	0	0	0
N/A	Immunoglobulin delta heavy chain	IGD_HUMAN	80Step_Domain_p80.0_to_160.0	80	160	80.0 AA STEP	80	0	0	0	0	0	0	0	1	0	0			0	0	0	0	0	0
N/A	Immunoglobulin delta heavy chain	IGD_HUMAN	80Step_Domain_p160.0_to_240.0	160	240	80.0 AA STEP	80	2	0	0	0	0	0	0.0125	1	1	0	DSYYMTSSQLSTPLQQWR		4	0	0	0	0	0
N/A	Immunoglobulin delta heavy chain	IGD_HUMAN	80Step_Domain_p240.0_to_320.0	240	320	80.0 AA STEP	80	0	0	0	0	0	0	0	1	0	0			0	0	0	0	0	0
N/A	Immunoglobulin delta heavy chain	IGD_HUMAN	80Step_Domain_p320.0_to_400.0	320	400	80.0 AA STEP	80	4	9	0	0	0	0	0.05	0.007	4	0	DAHLTWEVAGK VPTGGVEEGLLER DAHLTWEVAGK VPTGGVEEGLLER		8	6	0	0	0	0
N/A	Immunoglobulin delta heavy chain	IGD_HUMAN	80Step_Domain_p400.0_to_480.0	400	480	80.0 AA STEP	80	0	0	0	0	0	0	0	1	0	0			0	0	0	0	0	0
N/A	Immunoglobulin delta heavy chain	IGD_HUMAN	80Step_Domain_p480.0_to_512.0	480	512	80.0 AA STEP	32	4	0	0	0	0	0	0.03125	1	1	0	SLEVSYVTDHGPM		8	0	0	0	0	0
N/A	Immunoglobulin delta heavy chain	IGD_HUMAN	100Step_Domain_p0_to_100	0	100	100.0 AA STEP	100	2	3	0	0	0	0	0.02	1	2	0	VTISVDTSR VTISVDTSR		4	2	0	0	0	0
N/A	Immunoglobulin delta heavy chain	IGD_HUMAN	100Step_Domain_p100.0_to_200.0	100	200	100.0 AA STEP	100	2	0	0	0	0	0	0.01	1	1	0	DSYYMTSSQLSTPLQQWR		4	0	0	0	0	0
N/A	Immunoglobulin delta heavy chain	IGD_HUMAN	100Step_Domain_p200.0_to_300.0	200	300	100.0 AA STEP	100	2	0	0	0	0	0	0.01	1	1	0	DSYYMTSSQLSTPLQQWR		4	0	0	0	0	0
N/A	Immunoglobulin delta heavy chain	IGD_HUMAN	100Step_Domain_p300.0_to_400.0	300	400	100.0 AA STEP	100	4	9	0	0	0	0	0.04	0.0174	4	0	DAHLTWEVAGK VPTGGVEEGLLER DAHLTWEVAGK VPTGGVEEGLLER		8	6	0	0	0	0
N/A	Immunoglobulin delta heavy chain	IGD_HUMAN	100Step_Domain_p400.0_to_500.0	400	500	100.0 AA STEP	100	4	0	0	0	0	0	0.01	1	1	0	SLEVSYVTDHGPM		8	0	0	0	0	0
N/A	Immunoglobulin delta heavy chain	IGD_HUMAN	100Step_Domain_p500.0_to_512.0	500	512	100.0 AA STEP	12	0	0	0	0	0	0	0	1	0	0			0	0	0	0	0	0
IGK@	IGK@ protein	Q6P5S8_HUMAN	Ig-like	16	119	DOMAINS	103	5	8	0	0	0	0	0.038835	0.2008	4	0	FSGSGSGTDFTLTITR LLIYGASSR FSGSGSGTDFTLTITR LLIYGASSR		10	12	0	0	0	0
IGK@	IGK@ protein	Q6P5S8_HUMAN	Ig-like_135_232	135	232	DOMAINS	97	160	157	165	165	165	165	-0.0412371	0.2008	161	165	DSTYSLSSTLTLSK RTVAAPSVFIFPPSDEQLK SGTASVVCLLNNFYPR TVAAPSVFIFPPSDEQLK VDNALQSGNSQESVTEQDSK VDNALQSGNSQESVTEQDSKDSTYSLSSTLTLSK VQWKVDNALQSGNSQESVTEQDSK VYACEVTHQGLSSPVTK DSTYSLSSTLTLSK SGTASVVCLLNNFYPR TVAAPSVFIFPPSDEQLK VDNALQSGNSQESVTEQDSK VDNALQSGNSQESVTEQDSKDSTYSLSSTLTLSK DSTYSLSSTLTLSK SGTASVVCLLNNFYPR TVAAPSVFIFPPSDEQLK VDNALQSGNSQESVTEQDSK	DSTYSLSSTLTLSK TVAAPSVFIFPPSDEQLK VDNALQSGNSQESVTEQDSK DSTYSLSSTLTLSK SGTASVVCLLNNFYPR TVAAPSVFIFPPSDEQLK VDNALQSGNSQESVTEQDSK DSTYSLSSTLTLSK TVAAPSVFIFPPSDEQLK VDNALQSGNSQESVTEQDSK	310	236	62	10	26	34
IGK@	IGK@ protein	Q6P5S8_HUMAN	50Step_Domain_p0_to_50	0	50	50.0 AA STEP	50	0	0	0	0	0	0	0	1	0	0			0	0	0	0	0	0
IGK@	IGK@ protein	Q6P5S8_HUMAN	50Step_Domain_p50.0_to_100.0	50	100	50.0 AA STEP	50	5	8	0	0	0	0	0.08	1	4	0	FSGSGSGTDFTLTITR LLIYGASSR FSGSGSGTDFTLTITR LLIYGASSR		10	12	0	0	0	0
IGK@	IGK@ protein	Q6P5S8_HUMAN	50Step_Domain_p100.0_to_150.0	100	150	50.0 AA STEP	50	73	63	53	66	63	39	0.14	1	63	56	RTVAAPSVFIFPPSDEQLK SGTASVVCLLNNFYPR TVAAPSVFIFPPSDEQLK SGTASVVCLLNNFYPR TVAAPSVFIFPPSDEQLK SGTASVVCLLNNFYPR TVAAPSVFIFPPSDEQLK	TVAAPSVFIFPPSDEQLK SGTASVVCLLNNFYPR TVAAPSVFIFPPSDEQLK TVAAPSVFIFPPSDEQLK	142	94	20	4	10	8
IGK@	IGK@ protein	Q6P5S8_HUMAN	50Step_Domain_p150.0_to_200.0	150	200	50.0 AA STEP	50	99	109	144	99	114	126	0.08	1	117	113	DSTYSLSSTLTLSK SGTASVVCLLNNFYPR VDNALQSGNSQESVTEQDSK VDNALQSGNSQESVTEQDSKDSTYSLSSTLTLSK VQWKVDNALQSGNSQESVTEQDSK DSTYSLSSTLTLSK SGTASVVCLLNNFYPR VDNALQSGNSQESVTEQDSK VDNALQSGNSQESVTEQDSKDSTYSLSSTLTLSK DSTYSLSSTLTLSK SGTASVVCLLNNFYPR VDNALQSGNSQESVTEQDSK	DSTYSLSSTLTLSK VDNALQSGNSQESVTEQDSK DSTYSLSSTLTLSK SGTASVVCLLNNFYPR VDNALQSGNSQESVTEQDSK DSTYSLSSTLTLSK VDNALQSGNSQESVTEQDSK	192	164	54	6	18	26
IGK@	IGK@ protein	Q6P5S8_HUMAN	50Step_Domain_p200.0_to_236.0	200	236	50.0 AA STEP	36	48	64	53	33	38	39	0.5	0.248	55	37	DSTYSLSSTLTLSK VDNALQSGNSQESVTEQDSKDSTYSLSSTLTLSK VYACEVTHQGLSSPVTK DSTYSLSSTLTLSK VDNALQSGNSQESVTEQDSKDSTYSLSSTLTLSK DSTYSLSSTLTLSK	DSTYSLSSTLTLSK DSTYSLSSTLTLSK DSTYSLSSTLTLSK	94	96	20	2	6	8
IGK@	IGK@ protein	Q6P5S8_HUMAN	80Step_Domain_p0_to_80	0	80	80.0 AA STEP	80	4	1	0	0	0	0	0.025	1	2	0	LLIYGASSR LLIYGASSR		8	2	0	0	0	0
IGK@	IGK@ protein	Q6P5S8_HUMAN	80Step_Domain_p80.0_to_160.0	80	160	80.0 AA STEP	80	74	69	53	66	63	39	0.1125	1	65	56	FSGSGSGTDFTLTITR RTVAAPSVFIFPPSDEQLK SGTASVVCLLNNFYPR TVAAPSVFIFPPSDEQLK FSGSGSGTDFTLTITR SGTASVVCLLNNFYPR TVAAPSVFIFPPSDEQLK SGTASVVCLLNNFYPR TVAAPSVFIFPPSDEQLK	TVAAPSVFIFPPSDEQLK SGTASVVCLLNNFYPR TVAAPSVFIFPPSDEQLK TVAAPSVFIFPPSDEQLK	144	104	20	4	10	8
IGK@	IGK@ protein	Q6P5S8_HUMAN	80Step_Domain_p160.0_to_236.0	160	236	80.0 AA STEP	76	107	109	144	99	114	126	0.0921053	1	120	113	DSTYSLSSTLTLSK SGTASVVCLLNNFYPR VDNALQSGNSQESVTEQDSK VDNALQSGNSQESVTEQDSKDSTYSLSSTLTLSK VQWKVDNALQSGNSQESVTEQDSK VYACEVTHQGLSSPVTK DSTYSLSSTLTLSK SGTASVVCLLNNFYPR VDNALQSGNSQESVTEQDSK VDNALQSGNSQESVTEQDSKDSTYSLSSTLTLSK DSTYSLSSTLTLSK SGTASVVCLLNNFYPR VDNALQSGNSQESVTEQDSK	DSTYSLSSTLTLSK VDNALQSGNSQESVTEQDSK DSTYSLSSTLTLSK SGTASVVCLLNNFYPR VDNALQSGNSQESVTEQDSK DSTYSLSSTLTLSK VDNALQSGNSQESVTEQDSK	208	164	54	6	18	26
IGK@	IGK@ protein	Q6P5S8_HUMAN	100Step_Domain_p0_to_100	0	100	100.0 AA STEP	100	5	8	0	0	0	0	0.04	0.8637	4	0	FSGSGSGTDFTLTITR LLIYGASSR FSGSGSGTDFTLTITR LLIYGASSR		10	12	0	0	0	0
IGK@	IGK@ protein	Q6P5S8_HUMAN	100Step_Domain_p100.0_to_200.0	100	200	100.0 AA STEP	100	152	157	165	165	165	165	-0.07	0.2928	158	165	DSTYSLSSTLTLSK RTVAAPSVFIFPPSDEQLK SGTASVVCLLNNFYPR TVAAPSVFIFPPSDEQLK VDNALQSGNSQESVTEQDSK VDNALQSGNSQESVTEQDSKDSTYSLSSTLTLSK VQWKVDNALQSGNSQESVTEQDSK DSTYSLSSTLTLSK SGTASVVCLLNNFYPR TVAAPSVFIFPPSDEQLK VDNALQSGNSQESVTEQDSK VDNALQSGNSQESVTEQDSKDSTYSLSSTLTLSK DSTYSLSSTLTLSK SGTASVVCLLNNFYPR TVAAPSVFIFPPSDEQLK VDNALQSGNSQESVTEQDSK	DSTYSLSSTLTLSK TVAAPSVFIFPPSDEQLK VDNALQSGNSQESVTEQDSK DSTYSLSSTLTLSK SGTASVVCLLNNFYPR TVAAPSVFIFPPSDEQLK VDNALQSGNSQESVTEQDSK DSTYSLSSTLTLSK TVAAPSVFIFPPSDEQLK VDNALQSGNSQESVTEQDSK	294	236	62	10	26	34
IGK@	IGK@ protein	Q6P5S8_HUMAN	100Step_Domain_p200.0_to_236.0	200	236	100.0 AA STEP	36	48	64	53	33	38	39	0.5	0.0015	55	37	DSTYSLSSTLTLSK VDNALQSGNSQESVTEQDSKDSTYSLSSTLTLSK VYACEVTHQGLSSPVTK DSTYSLSSTLTLSK VDNALQSGNSQESVTEQDSKDSTYSLSSTLTLSK DSTYSLSSTLTLSK	DSTYSLSSTLTLSK DSTYSLSSTLTLSK DSTYSLSSTLTLSK	94	96	20	2	6	8
N/A	Myosin-reactive immunoglobulin heavy chain variable region	Q9UL89_HUMAN	50Step_Domain_p0_to_50	0	50	50.0 AA STEP	50	2	1	0	0	0	0	0.02	0.3789	1	0	QAPGQGLEWMGR QAPGQGLEWMGR		4	2	0	0	0	0
N/A	Myosin-reactive immunoglobulin heavy chain variable region	Q9UL89_HUMAN	50Step_Domain_p50.0_to_100.0	50	100	50.0 AA STEP	50	2	3	0	0	0	0	0.04	0.054	2	0	STSTAYMELSSLR STSTAYMELSSLR		4	4	0	0	0	0
N/A	Myosin-reactive immunoglobulin heavy chain variable region	Q9UL89_HUMAN	50Step_Domain_p100.0_to_116.0	100	116	50.0 AA STEP	16	0	0	0	0	0	0	0	1	0	0			0	0	0	0	0	0
N/A	Myosin-reactive immunoglobulin heavy chain variable region	Q9UL89_HUMAN	80Step_Domain_p0_to_80	0	80	80.0 AA STEP	80	4	4	0	0	0	0	0.0375	0.092	3	0	QAPGQGLEWMGR STSTAYMELSSLR QAPGQGLEWMGR STSTAYMELSSLR		8	6	0	0	0	0
N/A	Myosin-reactive immunoglobulin heavy chain variable region	Q9UL89_HUMAN	80Step_Domain_p80.0_to_116.0	80	116	80.0 AA STEP	36	2	3	0	0	0	0	0.0555556	0.3572	2	0	STSTAYMELSSLR STSTAYMELSSLR		4	4	0	0	0	0
N/A	Myosin-reactive immunoglobulin heavy chain variable region	Q9UL89_HUMAN	100Step_Domain_p0_to_100	0	100	100.0 AA STEP	100	4	4	0	0	0	0	0.03	0.0444	3	0	QAPGQGLEWMGR STSTAYMELSSLR QAPGQGLEWMGR STSTAYMELSSLR		8	6	0	0	0	0
N/A	Myosin-reactive immunoglobulin heavy chain variable region	Q9UL89_HUMAN	100Step_Domain_p100.0_to_116.0	100	116	100.0 AA STEP	16	0	0	0	0	0	0	0	1	0	0			0	0	0	0	0	0
CPN2	Carboxypeptidase N subunit 2	CPN2_HUMAN	LRRNT	22	49	DOMAINS	27	0	0	0	0	0	0	0	1	0	0			0	0	0	0	0	0
CPN2	Carboxypeptidase N subunit 2	CPN2_HUMAN	LRRCT	395	447	DOMAINS	52	1	0	0	0	0	0	0	0.39	0	0	GQVVPALNEK		2	0	0	0	0	0
CPN2	Carboxypeptidase N subunit 2	CPN2_HUMAN	LRR 1	98	119	REPEAT	21	0	0	0	0	0	0	0	1	0	0			0	0	0	0	0	0
CPN2	Carboxypeptidase N subunit 2	CPN2_HUMAN	LRR 2	122	143	REPEAT	21	0	0	0	0	0	0	0	1	0	0			0	0	0	0	0	0
CPN2	Carboxypeptidase N subunit 2	CPN2_HUMAN	LRR 3	146	167	REPEAT	21	0	0	0	0	0	0	0	1	0	0			0	0	0	0	0	0
CPN2	Carboxypeptidase N subunit 2	CPN2_HUMAN	LRR 4	170	191	REPEAT	21	0	0	0	0	0	0	0	1	0	0			0	0	0	0	0	0
CPN2	Carboxypeptidase N subunit 2	CPN2_HUMAN	LRR 5	194	215	REPEAT	21	0	0	0	0	0	0	0	1	0	0			0	0	0	0	0	0
CPN2	Carboxypeptidase N subunit 2	CPN2_HUMAN	LRR 6	218	239	REPEAT	21	0	0	0	0	0	0	0	1	0	0			0	0	0	0	0	0
CPN2	Carboxypeptidase N subunit 2	CPN2_HUMAN	LRR 7	242	263	REPEAT	21	0	0	0	0	0	0	0	1	0	0			0	0	0	0	0	0
CPN2	Carboxypeptidase N subunit 2	CPN2_HUMAN	LRR 8	266	287	REPEAT	21	0	0	0	0	0	0	0	1	0	0			0	0	0	0	0	0
CPN2	Carboxypeptidase N subunit 2	CPN2_HUMAN	LRR 9	290	311	REPEAT	21	0	0	0	0	0	0	0	1	0	0			0	0	0	0	0	0
CPN2	Carboxypeptidase N subunit 2	CPN2_HUMAN	LRR 10	314	335	REPEAT	21	0	0	0	0	0	0	0	1	0	0			0	0	0	0	0	0
CPN2	Carboxypeptidase N subunit 2	CPN2_HUMAN	LRR 11	338	359	REPEAT	21	0	0	0	0	0	0	0	1	0	0			0	0	0	0	0	0
CPN2	Carboxypeptidase N subunit 2	CPN2_HUMAN	LRR 12	362	383	REPEAT	21	1	0	0	0	0	0	0	0.0132	0	0	LELLSLSK		2	0	0	0	0	0
CPN2	Carboxypeptidase N subunit 2	CPN2_HUMAN	50Step_Domain_p0_to_50	0	50	50.0 AA STEP	50	0	0	0	0	0	0	0	1	0	0			0	0	0	0	0	0
CPN2	Carboxypeptidase N subunit 2	CPN2_HUMAN	50Step_Domain_p50.0_to_100.0	50	100	50.0 AA STEP	50	2	0	0	0	0	0	0.02	0.4587	1	0	NIIFVETSFTTLETR		4	0	0	0	0	0
CPN2	Carboxypeptidase N subunit 2	CPN2_HUMAN	50Step_Domain_p100.0_to_150.0	100	150	50.0 AA STEP	50	0	0	0	0	0	0	0	1	0	0			0	0	0	0	0	0
CPN2	Carboxypeptidase N subunit 2	CPN2_HUMAN	50Step_Domain_p150.0_to_200.0	150	200	50.0 AA STEP	50	0	0	0	0	0	0	0	1	0	0			0	0	0	0	0	0
CPN2	Carboxypeptidase N subunit 2	CPN2_HUMAN	50Step_Domain_p200.0_to_250.0	200	250	50.0 AA STEP	50	0	0	0	0	0	0	0	1	0	0			0	0	0	0	0	0
CPN2	Carboxypeptidase N subunit 2	CPN2_HUMAN	50Step_Domain_p250.0_to_300.0	250	300	50.0 AA STEP	50	0	0	0	0	0	0	0	1	0	0			0	0	0	0	0	0
CPN2	Carboxypeptidase N subunit 2	CPN2_HUMAN	50Step_Domain_p300.0_to_350.0	300	350	50.0 AA STEP	50	0	0	0	0	0	0	0	1	0	0			0	0	0	0	0	0
CPN2	Carboxypeptidase N subunit 2	CPN2_HUMAN	50Step_Domain_p350.0_to_400.0	350	400	50.0 AA STEP	50	1	0	0	0	0	0	0	1	0	0	LELLSLSK		2	0	0	0	0	0
CPN2	Carboxypeptidase N subunit 2	CPN2_HUMAN	50Step_Domain_p400.0_to_450.0	400	450	50.0 AA STEP	50	1	0	0	0	0	0	0	1	0	0	GQVVPALNEK		2	0	0	0	0	0
CPN2	Carboxypeptidase N subunit 2	CPN2_HUMAN	50Step_Domain_p450.0_to_500.0	450	500	50.0 AA STEP	50	2	0	0	0	0	0	0.02	0.4587	1	0	AGGSWDLAVQER		4	0	0	0	0	0
CPN2	Carboxypeptidase N subunit 2	CPN2_HUMAN	50Step_Domain_p500.0_to_545.0	500	545	50.0 AA STEP	45	0	0	0	0	0	0	0	1	0	0			0	0	0	0	0	0
CPN2	Carboxypeptidase N subunit 2	CPN2_HUMAN	80Step_Domain_p0_to_80	0	80	80.0 AA STEP	80	2	0	0	0	0	0	0.0125	1	1	0	NIIFVETSFTTLETR		4	0	0	0	0	0
CPN2	Carboxypeptidase N subunit 2	CPN2_HUMAN	80Step_Domain_p80.0_to_160.0	80	160	80.0 AA STEP	80	0	0	0	0	0	0	0	1	0	0			0	0	0	0	0	0
CPN2	Carboxypeptidase N subunit 2	CPN2_HUMAN	80Step_Domain_p160.0_to_240.0	160	240	80.0 AA STEP	80	0	0	0	0	0	0	0	1	0	0			0	0	0	0	0	0
CPN2	Carboxypeptidase N subunit 2	CPN2_HUMAN	80Step_Domain_p240.0_to_320.0	240	320	80.0 AA STEP	80	0	0	0	0	0	0	0	1	0	0			0	0	0	0	0	0
CPN2	Carboxypeptidase N subunit 2	CPN2_HUMAN	80Step_Domain_p320.0_to_400.0	320	400	80.0 AA STEP	80	1	0	0	0	0	0	0	1	0	0	LELLSLSK		2	0	0	0	0	0
CPN2	Carboxypeptidase N subunit 2	CPN2_HUMAN	80Step_Domain_p400.0_to_480.0	400	480	80.0 AA STEP	80	3	0	0	0	0	0	0.0125	0.3003	1	0	AGGSWDLAVQER GQVVPALNEK		6	0	0	0	0	0
CPN2	Carboxypeptidase N subunit 2	CPN2_HUMAN	80Step_Domain_p480.0_to_545.0	480	545	80.0 AA STEP	65	0	0	0	0	0	0	0	1	0	0			0	0	0	0	0	0
CPN2	Carboxypeptidase N subunit 2	CPN2_HUMAN	100Step_Domain_p0_to_100	0	100	100.0 AA STEP	100	2	0	0	0	0	0	0.01	1	1	0	NIIFVETSFTTLETR		4	0	0	0	0	0
CPN2	Carboxypeptidase N subunit 2	CPN2_HUMAN	100Step_Domain_p100.0_to_200.0	100	200	100.0 AA STEP	100	0	0	0	0	0	0	0	1	0	0			0	0	0	0	0	0
CPN2	Carboxypeptidase N subunit 2	CPN2_HUMAN	100Step_Domain_p200.0_to_300.0	200	300	100.0 AA STEP	100	0	0	0	0	0	0	0	1	0	0			0	0	0	0	0	0
CPN2	Carboxypeptidase N subunit 2	CPN2_HUMAN	100Step_Domain_p300.0_to_400.0	300	400	100.0 AA STEP	100	1	0	0	0	0	0	0	1	0	0	LELLSLSK		2	0	0	0	0	0
CPN2	Carboxypeptidase N subunit 2	CPN2_HUMAN	100Step_Domain_p400.0_to_500.0	400	500	100.0 AA STEP	100	3	0	0	0	0	0	0.01	0.3672	1	0	AGGSWDLAVQER GQVVPALNEK		6	0	0	0	0	0
CPN2	Carboxypeptidase N subunit 2	CPN2_HUMAN	100Step_Domain_p500.0_to_545.0	500	545	100.0 AA STEP	45	0	0	0	0	0	0	0	1	0	0			0	0	0	0	0	0
N/A	Myosin-reactive immunoglobulin kappa chain variable region	Q9UL86_HUMAN	50Step_Domain_p0_to_50	0	50	50.0 AA STEP	50	1	1	0	0	0	0	0.02	0.4419	1	0	LLIYGTSSR LLIYGTSSR		2	2	0	0	0	0
N/A	Myosin-reactive immunoglobulin kappa chain variable region	Q9UL86_HUMAN	50Step_Domain_p50.0_to_100.0	50	100	50.0 AA STEP	50	2	2	0	0	0	0	0.02	0.0276	1	0	FSGSGSETDFTLTISR LLIYGTSSR FSGSGSETDFTLTISR LLIYGTSSR		4	4	0	0	0	0
N/A	Myosin-reactive immunoglobulin kappa chain variable region	Q9UL86_HUMAN	50Step_Domain_p100.0_to_109.0	100	109	50.0 AA STEP	9	0	0	0	0	0	0	0	1	0	0			0	0	0	0	0	0
N/A	Myosin-reactive immunoglobulin kappa chain variable region	Q9UL86_HUMAN	80Step_Domain_p0_to_80	0	80	80.0 AA STEP	80	2	2	0	0	0	0	0.0125	0.0444	1	0	FSGSGSETDFTLTISR LLIYGTSSR FSGSGSETDFTLTISR LLIYGTSSR		4	4	0	0	0	0
N/A	Myosin-reactive immunoglobulin kappa chain variable region	Q9UL86_HUMAN	80Step_Domain_p80.0_to_109.0	80	109	80.0 AA STEP	29	0	0	0	0	0	0	0	1	0	0			0	0	0	0	0	0
N/A	Myosin-reactive immunoglobulin kappa chain variable region	Q9UL86_HUMAN	100Step_Domain_p0_to_100	0	100	100.0 AA STEP	100	2	2	0	0	0	0	0.01	0.0444	1	0	FSGSGSETDFTLTISR LLIYGTSSR FSGSGSETDFTLTISR LLIYGTSSR		4	4	0	0	0	0
N/A	Myosin-reactive immunoglobulin kappa chain variable region	Q9UL86_HUMAN	100Step_Domain_p100.0_to_109.0	100	109	100.0 AA STEP	9	0	0	0	0	0	0	0	1	0	0			0	0	0	0	0	0
AEBP1	Adipocyte enhancer-binding protein 1	AEBP1_HUMAN	Interaction with MAPK1 and MAPK3	421	624	REGIONS	203	33	37	17	41	40	37	-0.0492611	0.125	29	39	DTPVLSELPEPVVAR FTGVITQGR IYAMEISDNPGEHELGEPEFR LNMQTGATEDDYYDGAWCAEDDAR TQWIEVDTR YTAGIHGNEVLGR DTPVLSELPEPVVAR FTGVITQGR IYAMEISDNPGEHELGEPEFR LNMQTGATEDDYYDGAWCAEDDAR TQWIEVDTR YTAGIHGNEVLGR DTPVLSELPEPVVAR FTGVITQGR IYAMEISDNPGEHELGEPEFR VVNEECPTITR YTAGIHGNEVLGR	DTPVLSELPEPVVAR FTGVITQGR IYAMEISDNPGEHELGEPEFR LNMQTGATEDDYYDGAWCAEDDAR TQWIEVDTR YTAGIHGNEVLGR DTPVLSELPEPVVAR FTGVITQGR IYAMEISDNPGEHELGEPEFR TQWIEVDTR YTAGIHGNEVLGR DTPVLSELPEPVVAR IYAMEISDNPGEHELGEPEFR LNMQTGATEDDYYDGAWCAEDDAR TQWIEVDTR	30	46	16	36	32	28
AEBP1	Adipocyte enhancer-binding protein 1	AEBP1_HUMAN	Required for transcriptional repression	941	1158	REGIONS	217	4	5	8	5	0	8	0.00921659	1	6	4	ILNPGEYR ILNPGEYR ILNPGEYR VTAHAEGYTPSAK	ILNPGEYR ILNPGEYR	4	6	8	4	0	6
AEBP1	Adipocyte enhancer-binding protein 1	AEBP1_HUMAN	50Step_Domain_p0_to_50	0	50	50.0 AA STEP	50	0	0	0	0	0	0	0	1	0	0			0	0	0	0	0	0
AEBP1	Adipocyte enhancer-binding protein 1	AEBP1_HUMAN	50Step_Domain_p50.0_to_100.0	50	100	50.0 AA STEP	50	0	0	0	0	0	0	0	1	0	0			0	0	0	0	0	0
AEBP1	Adipocyte enhancer-binding protein 1	AEBP1_HUMAN	50Step_Domain_p100.0_to_150.0	100	150	50.0 AA STEP	50	0	0	2	0	0	0	0.02	1	1	0	ESLEGSPRPPK		0	0	2	0	0	0
AEBP1	Adipocyte enhancer-binding protein 1	AEBP1_HUMAN	50Step_Domain_p150.0_to_200.0	150	200	50.0 AA STEP	50	0	0	0	0	0	0	0	1	0	0			0	0	0	0	0	0
AEBP1	Adipocyte enhancer-binding protein 1	AEBP1_HUMAN	50Step_Domain_p200.0_to_250.0	200	250	50.0 AA STEP	50	2	3	4	0	0	0	0.06	1	3	0	EDYEDFEYIR EDYEDFEYIR EDYEDFEYIR		2	4	4	0	0	0
AEBP1	Adipocyte enhancer-binding protein 1	AEBP1_HUMAN	50Step_Domain_p250.0_to_300.0	250	300	50.0 AA STEP	50	2	3	4	0	0	0	0.06	1	3	0	EDYEDFEYIR EDYEDFEYIR EDYEDFEYIR		2	4	4	0	0	0
AEBP1	Adipocyte enhancer-binding protein 1	AEBP1_HUMAN	50Step_Domain_p300.0_to_350.0	300	350	50.0 AA STEP	50	0	0	0	0	0	0	0	1	0	0			0	0	0	0	0	0
AEBP1	Adipocyte enhancer-binding protein 1	AEBP1_HUMAN	50Step_Domain_p350.0_to_400.0	350	400	50.0 AA STEP	50	13	10	11	14	13	19	-0.08	1	11	15	GEELEEEWTPTEK KGEELEEEWTPTEK GEELEEEWTPTEK KGEELEEEWTPTEK KGEELEEEWTPTEK	GEELEEEWTPTEK KGEELEEEWTPTEK KGEELEEEWTPTEK KGEELEEEWTPTEK	12	12	10	12	10	14
AEBP1	Adipocyte enhancer-binding protein 1	AEBP1_HUMAN	50Step_Domain_p400.0_to_450.0	400	450	50.0 AA STEP	50	7	8	0	14	5	13	-0.12	0.7272	5	11	LNMQTGATEDDYYDGAWCAEDDAR TQWIEVDTR LNMQTGATEDDYYDGAWCAEDDAR TQWIEVDTR	LNMQTGATEDDYYDGAWCAEDDAR TQWIEVDTR TQWIEVDTR LNMQTGATEDDYYDGAWCAEDDAR TQWIEVDTR	6	10	0	12	4	10
AEBP1	Adipocyte enhancer-binding protein 1	AEBP1_HUMAN	50Step_Domain_p450.0_to_500.0	450	500	50.0 AA STEP	50	4	2	2	5	3	0	0	1	3	3	FTGVITQGR FTGVITQGR FTGVITQGR	FTGVITQGR FTGVITQGR	4	2	2	4	2	0
AEBP1	Adipocyte enhancer-binding protein 1	AEBP1_HUMAN	50Step_Domain_p500.0_to_550.0	500	550	50.0 AA STEP	50	4	6	4	5	10	8	-0.06	1	5	8	DTPVLSELPEPVVAR DTPVLSELPEPVVAR DTPVLSELPEPVVAR	DTPVLSELPEPVVAR DTPVLSELPEPVVAR DTPVLSELPEPVVAR	4	8	4	4	8	6
AEBP1	Adipocyte enhancer-binding protein 1	AEBP1_HUMAN	50Step_Domain_p550.0_to_600.0	550	600	50.0 AA STEP	50	9	13	8	11	15	16	-0.08	1	10	14	IYAMEISDNPGEHELGEPEFR IYAMEISDNPGEHELGEPEFR IYAMEISDNPGEHELGEPEFR VVNEECPTITR	IYAMEISDNPGEHELGEPEFR IYAMEISDNPGEHELGEPEFR IYAMEISDNPGEHELGEPEFR	8	16	8	10	12	12
AEBP1	Adipocyte enhancer-binding protein 1	AEBP1_HUMAN	50Step_Domain_p600.0_to_650.0	600	650	50.0 AA STEP	50	17	21	8	18	23	16	-0.08	1	15	19	IYAMEISDNPGEHELGEPEFR YTAGIHGNEVLGR IYAMEISDNPGEHELGEPEFR YTAGIHGNEVLGR IYAMEISDNPGEHELGEPEFR YTAGIHGNEVLGR	IYAMEISDNPGEHELGEPEFR YTAGIHGNEVLGR IYAMEISDNPGEHELGEPEFR YTAGIHGNEVLGR IYAMEISDNPGEHELGEPEFR	16	26	8	16	18	12
AEBP1	Adipocyte enhancer-binding protein 1	AEBP1_HUMAN	50Step_Domain_p650.0_to_700.0	650	700	50.0 AA STEP	50	0	0	0	0	0	0	0	1	0	0			0	0	0	0	0	0
AEBP1	Adipocyte enhancer-binding protein 1	AEBP1_HUMAN	50Step_Domain_p700.0_to_750.0	700	750	50.0 AA STEP	50	22	16	8	20	18	8	0	1	15	15	AIIAWMEK VPNNNLPIPER YLSPDATVSTEVR AIIAWMEK VPNNNLPIPER YLSPDATVSTEVR VPNNNLPIPER YLSPDATVSTEVR	AIIAWMEK VPNNNLPIPER YLSPDATVSTEVR AIIAWMEK VPNNNLPIPER YLSPDATVSTEVR YLSPDATVSTEVR	20	20	8	18	14	6
AEBP1	Adipocyte enhancer-binding protein 1	AEBP1_HUMAN	50Step_Domain_p750.0_to_800.0	750	800	50.0 AA STEP	50	59	54	63	56	53	51	0.12	0.9864	59	53	AIIAWMEK GEDEDEVSEAQETPDHAIFR LVSYPYDMAR TPTQEQLLAAAMAAAR AIIAWMEK GEDEDEVSEAQETPDHAIFR LVSYPYDMAR NPFVLGANLNGGER TPTQEQLLAAAMAAAR GEDEDEVSEAQETPDHAIFR LVSYPYDMAR NPFVLGANLNGGER TPTQEQLLAAAMAAAR	AIIAWMEK GEDEDEVSEAQETPDHAIFR LVSYPYDMAR TPTQEQLLAAAMAAAR AIIAWMEK GEDEDEVSEAQETPDHAIFR LVSYPYDMAR NPFVLGANLNGGER TPTQEQLLAAAMAAAR GEDEDEVSEAQETPDHAIFR LVSYPYDMAR NPFVLGANLNGGER TPTQEQLLAAAMAAAR	54	68	60	50	42	38
AEBP1	Adipocyte enhancer-binding protein 1	AEBP1_HUMAN	50Step_Domain_p800.0_to_850.0	800	850	50.0 AA STEP	50	26	27	44	25	23	27	0.14	0.1296	32	25	GEDEDEVSEAQETPDHAIFR GEDEDEVSEAQETPDHAIFR GEDEDEVSEAQETPDHAIFR	GEDEDEVSEAQETPDHAIFR GEDEDEVSEAQETPDHAIFR GEDEDEVSEAQETPDHAIFR	24	34	42	22	18	20
AEBP1	Adipocyte enhancer-binding protein 1	AEBP1_HUMAN	50Step_Domain_p850.0_to_900.0	850	900	50.0 AA STEP	50	7	13	19	5	13	11	0.06	1	13	10	EALLTFMEQVHR EALLTFMEQVHR FPHESELPR EALLTFMEQVHR FPHESELPR	FPHESELPR EALLTFMEQVHR FPHESELPR FPHESELPR	6	16	18	4	10	8
AEBP1	Adipocyte enhancer-binding protein 1	AEBP1_HUMAN	50Step_Domain_p900.0_to_950.0	900	950	50.0 AA STEP	50	11	13	21	5	10	8	0.14	0.1296	15	8	EALLTFMEQVHR ILNPGEYR EALLTFMEQVHR ILNPGEYR EALLTFMEQVHR ILNPGEYR	ILNPGEYR EALLTFMEQVHR ILNPGEYR	10	16	20	4	8	6
AEBP1	Adipocyte enhancer-binding protein 1	AEBP1_HUMAN	50Step_Domain_p950.0_to_1000.0	950	1000	50.0 AA STEP	50	4	5	8	5	0	8	0.04	1	6	4	ILNPGEYR ILNPGEYR ILNPGEYR VTAHAEGYTPSAK	ILNPGEYR ILNPGEYR	4	6	8	4	0	6
AEBP1	Adipocyte enhancer-binding protein 1	AEBP1_HUMAN	50Step_Domain_p1000.0_to_1050.0	1000	1050	50.0 AA STEP	50	0	0	0	0	0	0	0	1	0	0			0	0	0	0	0	0
AEBP1	Adipocyte enhancer-binding protein 1	AEBP1_HUMAN	50Step_Domain_p1050.0_to_1100.0	1050	1100	50.0 AA STEP	50	0	0	0	0	0	0	0	1	0	0			0	0	0	0	0	0
AEBP1	Adipocyte enhancer-binding protein 1	AEBP1_HUMAN	50Step_Domain_p1100.0_to_1150.0	1100	1150	50.0 AA STEP	50	0	0	0	0	0	0	0	1	0	0			0	0	0	0	0	0
AEBP1	Adipocyte enhancer-binding protein 1	AEBP1_HUMAN	50Step_Domain_p1150.0_to_1158.0	1150	1158	50.0 AA STEP	8	0	0	0	0	0	0	0	1	0	0			0	0	0	0	0	0
AEBP1	Adipocyte enhancer-binding protein 1	AEBP1_HUMAN	80Step_Domain_p0_to_80	0	80	80.0 AA STEP	80	0	0	0	0	0	0	0	1	0	0			0	0	0	0	0	0
AEBP1	Adipocyte enhancer-binding protein 1	AEBP1_HUMAN	80Step_Domain_p80.0_to_160.0	80	160	80.0 AA STEP	80	0	0	2	0	0	0	0.0125	1	1	0	ESLEGSPRPPK		0	0	2	0	0	0
AEBP1	Adipocyte enhancer-binding protein 1	AEBP1_HUMAN	80Step_Domain_p160.0_to_240.0	160	240	80.0 AA STEP	80	0	0	0	0	0	0	0	1	0	0			0	0	0	0	0	0
AEBP1	Adipocyte enhancer-binding protein 1	AEBP1_HUMAN	80Step_Domain_p240.0_to_320.0	240	320	80.0 AA STEP	80	2	3	4	0	0	0	0.0375	1	3	0	EDYEDFEYIR EDYEDFEYIR EDYEDFEYIR		2	4	4	0	0	0
AEBP1	Adipocyte enhancer-binding protein 1	AEBP1_HUMAN	80Step_Domain_p320.0_to_400.0	320	400	80.0 AA STEP	80	13	10	11	14	13	19	-0.05	1	11	15	GEELEEEWTPTEK KGEELEEEWTPTEK GEELEEEWTPTEK KGEELEEEWTPTEK KGEELEEEWTPTEK	GEELEEEWTPTEK KGEELEEEWTPTEK KGEELEEEWTPTEK KGEELEEEWTPTEK	12	12	10	12	10	14
AEBP1	Adipocyte enhancer-binding protein 1	AEBP1_HUMAN	80Step_Domain_p400.0_to_480.0	400	480	80.0 AA STEP	80	11	10	2	18	8	13	-0.0625	1	8	13	FTGVITQGR LNMQTGATEDDYYDGAWCAEDDAR TQWIEVDTR FTGVITQGR LNMQTGATEDDYYDGAWCAEDDAR TQWIEVDTR FTGVITQGR	FTGVITQGR LNMQTGATEDDYYDGAWCAEDDAR TQWIEVDTR FTGVITQGR TQWIEVDTR LNMQTGATEDDYYDGAWCAEDDAR TQWIEVDTR	10	12	2	16	6	10
AEBP1	Adipocyte enhancer-binding protein 1	AEBP1_HUMAN	80Step_Domain_p480.0_to_560.0	480	560	80.0 AA STEP	80	4	6	4	5	10	8	-0.0375	1	5	8	DTPVLSELPEPVVAR DTPVLSELPEPVVAR DTPVLSELPEPVVAR	DTPVLSELPEPVVAR DTPVLSELPEPVVAR DTPVLSELPEPVVAR	4	8	4	4	8	6
AEBP1	Adipocyte enhancer-binding protein 1	AEBP1_HUMAN	80Step_Domain_p560.0_to_640.0	560	640	80.0 AA STEP	80	17	21	11	18	23	16	-0.0375	1	16	19	IYAMEISDNPGEHELGEPEFR YTAGIHGNEVLGR IYAMEISDNPGEHELGEPEFR YTAGIHGNEVLGR IYAMEISDNPGEHELGEPEFR VVNEECPTITR YTAGIHGNEVLGR	IYAMEISDNPGEHELGEPEFR YTAGIHGNEVLGR IYAMEISDNPGEHELGEPEFR YTAGIHGNEVLGR IYAMEISDNPGEHELGEPEFR	16	26	10	16	18	12
AEBP1	Adipocyte enhancer-binding protein 1	AEBP1_HUMAN	80Step_Domain_p640.0_to_720.0	640	720	80.0 AA STEP	80	0	0	0	0	0	0	0	1	0	0			0	0	0	0	0	0
AEBP1	Adipocyte enhancer-binding protein 1	AEBP1_HUMAN	80Step_Domain_p720.0_to_800.0	720	800	80.0 AA STEP	80	74	66	72	70	68	59	0.0625	1	71	66	AIIAWMEK GEDEDEVSEAQETPDHAIFR LVSYPYDMAR TPTQEQLLAAAMAAAR VPNNNLPIPER YLSPDATVSTEVR AIIAWMEK GEDEDEVSEAQETPDHAIFR LVSYPYDMAR NPFVLGANLNGGER TPTQEQLLAAAMAAAR VPNNNLPIPER YLSPDATVSTEVR GEDEDEVSEAQETPDHAIFR LVSYPYDMAR NPFVLGANLNGGER TPTQEQLLAAAMAAAR VPNNNLPIPER YLSPDATVSTEVR	AIIAWMEK GEDEDEVSEAQETPDHAIFR LVSYPYDMAR TPTQEQLLAAAMAAAR VPNNNLPIPER YLSPDATVSTEVR AIIAWMEK GEDEDEVSEAQETPDHAIFR LVSYPYDMAR NPFVLGANLNGGER TPTQEQLLAAAMAAAR VPNNNLPIPER YLSPDATVSTEVR GEDEDEVSEAQETPDHAIFR LVSYPYDMAR NPFVLGANLNGGER TPTQEQLLAAAMAAAR YLSPDATVSTEVR	68	82	68	62	54	44
AEBP1	Adipocyte enhancer-binding protein 1	AEBP1_HUMAN	80Step_Domain_p800.0_to_880.0	800	880	80.0 AA STEP	80	26	32	49	29	25	37	0.075	1	36	30	GEDEDEVSEAQETPDHAIFR FPHESELPR GEDEDEVSEAQETPDHAIFR FPHESELPR GEDEDEVSEAQETPDHAIFR	FPHESELPR GEDEDEVSEAQETPDHAIFR FPHESELPR GEDEDEVSEAQETPDHAIFR FPHESELPR GEDEDEVSEAQETPDHAIFR	24	40	46	26	20	28
AEBP1	Adipocyte enhancer-binding protein 1	AEBP1_HUMAN	80Step_Domain_p880.0_to_960.0	880	960	80.0 AA STEP	80	11	18	27	9	13	19	0.0625	1	19	14	EALLTFMEQVHR ILNPGEYR EALLTFMEQVHR FPHESELPR ILNPGEYR EALLTFMEQVHR FPHESELPR ILNPGEYR VTAHAEGYTPSAK	FPHESELPR ILNPGEYR EALLTFMEQVHR FPHESELPR FPHESELPR ILNPGEYR	10	22	26	8	10	14
AEBP1	Adipocyte enhancer-binding protein 1	AEBP1_HUMAN	80Step_Domain_p960.0_to_1040.0	960	1040	80.0 AA STEP	80	0	0	2	0	0	0	0.0125	1	1	0	VTAHAEGYTPSAK		0	0	2	0	0	0
AEBP1	Adipocyte enhancer-binding protein 1	AEBP1_HUMAN	80Step_Domain_p1040.0_to_1120.0	1040	1120	80.0 AA STEP	80	0	0	0	0	0	0	0	1	0	0			0	0	0	0	0	0
AEBP1	Adipocyte enhancer-binding protein 1	AEBP1_HUMAN	80Step_Domain_p1120.0_to_1158.0	1120	1158	80.0 AA STEP	38	0	0	0	0	0	0	0	1	0	0			0	0	0	0	0	0
AEBP1	Adipocyte enhancer-binding protein 1	AEBP1_HUMAN	100Step_Domain_p0_to_100	0	100	100.0 AA STEP	100	0	0	0	0	0	0	0	1	0	0			0	0	0	0	0	0
AEBP1	Adipocyte enhancer-binding protein 1	AEBP1_HUMAN	100Step_Domain_p100.0_to_200.0	100	200	100.0 AA STEP	100	0	0	2	0	0	0	0.01	1	1	0	ESLEGSPRPPK		0	0	2	0	0	0
AEBP1	Adipocyte enhancer-binding protein 1	AEBP1_HUMAN	100Step_Domain_p200.0_to_300.0	200	300	100.0 AA STEP	100	2	3	4	0	0	0	0.03	1	3	0	EDYEDFEYIR EDYEDFEYIR EDYEDFEYIR		2	4	4	0	0	0
AEBP1	Adipocyte enhancer-binding protein 1	AEBP1_HUMAN	100Step_Domain_p300.0_to_400.0	300	400	100.0 AA STEP	100	13	10	11	14	13	19	-0.04	1	11	15	GEELEEEWTPTEK KGEELEEEWTPTEK GEELEEEWTPTEK KGEELEEEWTPTEK KGEELEEEWTPTEK	GEELEEEWTPTEK KGEELEEEWTPTEK KGEELEEEWTPTEK KGEELEEEWTPTEK	12	12	10	12	10	14
AEBP1	Adipocyte enhancer-binding protein 1	AEBP1_HUMAN	100Step_Domain_p400.0_to_500.0	400	500	100.0 AA STEP	100	11	10	2	18	8	13	-0.05	1	8	13	FTGVITQGR LNMQTGATEDDYYDGAWCAEDDAR TQWIEVDTR FTGVITQGR LNMQTGATEDDYYDGAWCAEDDAR TQWIEVDTR FTGVITQGR	FTGVITQGR LNMQTGATEDDYYDGAWCAEDDAR TQWIEVDTR FTGVITQGR TQWIEVDTR LNMQTGATEDDYYDGAWCAEDDAR TQWIEVDTR	10	12	2	16	6	10
AEBP1	Adipocyte enhancer-binding protein 1	AEBP1_HUMAN	100Step_Domain_p500.0_to_600.0	500	600	100.0 AA STEP	100	13	19	13	16	25	24	-0.07	1	15	22	DTPVLSELPEPVVAR IYAMEISDNPGEHELGEPEFR DTPVLSELPEPVVAR IYAMEISDNPGEHELGEPEFR DTPVLSELPEPVVAR IYAMEISDNPGEHELGEPEFR VVNEECPTITR	DTPVLSELPEPVVAR IYAMEISDNPGEHELGEPEFR DTPVLSELPEPVVAR IYAMEISDNPGEHELGEPEFR DTPVLSELPEPVVAR IYAMEISDNPGEHELGEPEFR	12	24	12	14	20	18
AEBP1	Adipocyte enhancer-binding protein 1	AEBP1_HUMAN	100Step_Domain_p600.0_to_700.0	600	700	100.0 AA STEP	100	17	21	8	18	23	16	-0.04	1	15	19	IYAMEISDNPGEHELGEPEFR YTAGIHGNEVLGR IYAMEISDNPGEHELGEPEFR YTAGIHGNEVLGR IYAMEISDNPGEHELGEPEFR YTAGIHGNEVLGR	IYAMEISDNPGEHELGEPEFR YTAGIHGNEVLGR IYAMEISDNPGEHELGEPEFR YTAGIHGNEVLGR IYAMEISDNPGEHELGEPEFR	16	26	8	16	18	12
AEBP1	Adipocyte enhancer-binding protein 1	AEBP1_HUMAN	100Step_Domain_p700.0_to_800.0	700	800	100.0 AA STEP	100	74	66	72	70	68	59	0.05	1	71	66	AIIAWMEK GEDEDEVSEAQETPDHAIFR LVSYPYDMAR TPTQEQLLAAAMAAAR VPNNNLPIPER YLSPDATVSTEVR AIIAWMEK GEDEDEVSEAQETPDHAIFR LVSYPYDMAR NPFVLGANLNGGER TPTQEQLLAAAMAAAR VPNNNLPIPER YLSPDATVSTEVR GEDEDEVSEAQETPDHAIFR LVSYPYDMAR NPFVLGANLNGGER TPTQEQLLAAAMAAAR VPNNNLPIPER YLSPDATVSTEVR	AIIAWMEK GEDEDEVSEAQETPDHAIFR LVSYPYDMAR TPTQEQLLAAAMAAAR VPNNNLPIPER YLSPDATVSTEVR AIIAWMEK GEDEDEVSEAQETPDHAIFR LVSYPYDMAR NPFVLGANLNGGER TPTQEQLLAAAMAAAR VPNNNLPIPER YLSPDATVSTEVR GEDEDEVSEAQETPDHAIFR LVSYPYDMAR NPFVLGANLNGGER TPTQEQLLAAAMAAAR YLSPDATVSTEVR	68	82	68	62	54	44
AEBP1	Adipocyte enhancer-binding protein 1	AEBP1_HUMAN	100Step_Domain_p800.0_to_900.0	800	900	100.0 AA STEP	100	33	40	63	29	35	37	0.11	0.042	45	34	EALLTFMEQVHR GEDEDEVSEAQETPDHAIFR EALLTFMEQVHR FPHESELPR GEDEDEVSEAQETPDHAIFR EALLTFMEQVHR FPHESELPR GEDEDEVSEAQETPDHAIFR	FPHESELPR GEDEDEVSEAQETPDHAIFR EALLTFMEQVHR FPHESELPR GEDEDEVSEAQETPDHAIFR FPHESELPR GEDEDEVSEAQETPDHAIFR	30	50	60	26	28	28
AEBP1	Adipocyte enhancer-binding protein 1	AEBP1_HUMAN	100Step_Domain_p900.0_to_1000.0	900	1000	100.0 AA STEP	100	11	13	23	5	10	8	0.08	0.4884	16	8	EALLTFMEQVHR ILNPGEYR EALLTFMEQVHR ILNPGEYR EALLTFMEQVHR ILNPGEYR VTAHAEGYTPSAK	ILNPGEYR EALLTFMEQVHR ILNPGEYR	10	16	22	4	8	6
AEBP1	Adipocyte enhancer-binding protein 1	AEBP1_HUMAN	100Step_Domain_p1000.0_to_1100.0	1000	1100	100.0 AA STEP	100	0	0	0	0	0	0	0	1	0	0			0	0	0	0	0	0
AEBP1	Adipocyte enhancer-binding protein 1	AEBP1_HUMAN	100Step_Domain_p1100.0_to_1158.0	1100	1158	100.0 AA STEP	58	0	0	0	0	0	0	0	1	0	0			0	0	0	0	0	0
PRELP	Prolargin	PRELP_HUMAN	LRR 1	95	114	REPEAT	19	3	3	25	13	5	32	-0.368421	1	10	17	IHYLYLQNNFITELPVESFQNATGLR IHYLYLQNNFITELPVESFQNATGLR KVPVIPPR	IHYLYLQNNFITELPVESFQNATGLR KVPVIPPR IHYLYLQNNFITELPVESFQNATGLR KVPVIPPR KVPVIPPR	2	2	26	12	6	36
PRELP	Prolargin	PRELP_HUMAN	LRR 2	115	138	REPEAT	23	23	35	16	28	32	20	-0.0869565	1	25	27	IHYLYLQNNFITELPVESFQNATGLR WINLDNNR IHYLYLQNNFITELPVESFQNATGLR WINLDNNR WINLDNNR	IHYLYLQNNFITELPVESFQNATGLR WINLDNNR IHYLYLQNNFITELPVESFQNATGLR WINLDNNR WINLDNNR	16	24	16	26	42	22
PRELP	Prolargin	PRELP_HUMAN	LRR 3	139	162	REPEAT	23	113	107	66	82	83	76	0.652174	1	95	80	LPGLVFLYMEK NQLEEVPSALPR LPGLVFLYMEK NQLEEVPSALPR LPGLVFLYMEK NQLEEVPSALPR	LPGLVFLYMEK NQLEEVPSALPR LPGLVFLYMEK NQLEEVPSALPR LPGLVFLYMEK NQLEEVPSALPR	80	74	68	76	108	86
PRELP	Prolargin	PRELP_HUMAN	LRR 4	163	183	REPEAT	20	28	61	53	41	58	60	-0.3	1	47	53	NQLEEVPSALPR LSQNHISR NQLEEVPSALPR NQLEEVPSALPR	LSQNHISR NQLEEVPSALPR NQLEEVPSALPR NQLEEVPSALPR	20	42	54	38	76	68
PRELP	Prolargin	PRELP_HUMAN	LRR 5	184	207	REPEAT	23	191	179	286	149	197	62	3.6087	0.0108	219	136	IPPGVFSK LENLLLLDLQHNR LSDGVFKPDTFHGLK IPPGVFSK LENLLLLDLQHNR LSDGVFKPDTFHGLK LSQNHISR IPPGVFSK LENLLLLDLQHNR LSDGVFKPDTFHGLK	IPPGVFSK LENLLLLDLQHNR LSDGVFKPDTFHGLK LSQNHISR IPPGVFSK LENLLLLDLQHNR LSDGVFKPDTFHGLK IPPGVFSK LENLLLLDLQHNR	136	124	294	138	258	70
PRELP	Prolargin	PRELP_HUMAN	LRR 6	208	233	REPEAT	25	169	127	173	132	175	76	1.12	1	156	128	LSDGVFKPDTFHGLK NLMQLNLAHNILR LSDGVFKPDTFHGLK NLMQLNLAHNILR LSDGVFKPDTFHGLK NLMQLNLAHNILR	LSDGVFKPDTFHGLK NLMQLNLAHNILR LSDGVFKPDTFHGLK NLMQLNLAHNILR NLMQLNLAHNILR	120	88	178	122	228	86
PRELP	Prolargin	PRELP_HUMAN	LRR 7	234	254	REPEAT	20	68	101	92	160	109	149	-2.6	0.3576	87	139	IETIPNGYFK VPTAIHQLYLDSNK IETIPNGYFK VPTAIHQLYLDSNK IETIPNGYFK VPTAIHQLYLDSNK	IETIPNGYFK VPTAIHQLYLDSNK IETIPNGYFK VPTAIHQLYLDSNK IETIPNGYFK VPTAIHQLYLDSNK	48	70	94	148	142	168
PRELP	Prolargin	PRELP_HUMAN	LRR 8	255	278	REPEAT	23	28	26	10	26	18	14	0.0869565	1	21	19	IETIPNGYFK SFPNLAFIR IETIPNGYFK SFPNLAFIR IETIPNGYFK SFPNLAFIR	IETIPNGYFK SFPNLAFIR IETIPNGYFK SFPNLAFIR IETIPNGYFK SFPNLAFIR	20	18	10	24	24	16
PRELP	Prolargin	PRELP_HUMAN	LRR 9	279	303	REPEAT	24	25	20	12	19	20	16	0.0416667	1	19	18	ISSVPAINNR ISSVPAINNR ISSVPAINNR	ISSVPAINNR ISSVPAINNR ISSVPAINNR	18	14	12	18	26	18
PRELP	Prolargin	PRELP_HUMAN	LRR 10	304	323	REPEAT	19	65	69	53	69	52	151	-1.52632	1	62	91	ISSVPAINNR LEHLYLNNNSIEK ISSVPAINNR LEHLYLNNNSIEK ISSVPAINNR LEHLYLNNNSIEK	ISSVPAINNR LEHLYLNNNSIEK ISSVPAINNR LEHLYLNNNSIEK ISSVPAINNR LEHLYLNNNSIEK	46	48	54	64	68	170
PRELP	Prolargin	PRELP_HUMAN	LRR 11	324	362	REPEAT	38	68	72	43	56	41	135	-0.421053	1	61	77	INGTQICPNDLVAFHDFSSDLENVPHLR LEHLYLNNNSIEK INGTQICPNDLVAFHDFSSDLENVPHLR LEHLYLNNNSIEK INGTQICPNDLVAFHDFSSDLENVPHLR LEHLYLNNNSIEK	INGTQICPNDLVAFHDFSSDLENVPHLR LEHLYLNNNSIEK INGTQICPNDLVAFHDFSSDLENVPHLR LEHLYLNNNSIEK LEHLYLNNNSIEK	48	50	44	52	54	152
PRELP	Prolargin	PRELP_HUMAN	LRR 12	363	382	REPEAT	19	0	0	0	0	0	0	0	1	0	0			0	0	0	0	0	0
PRELP	Prolargin	PRELP_HUMAN	50Step_Domain_p0_to_50	0	50	50.0 AA STEP	50	0	0	0	0	0	0	0	1	0	0			0	0	0	0	0	0
PRELP	Prolargin	PRELP_HUMAN	50Step_Domain_p50.0_to_100.0	50	100	50.0 AA STEP	50	0	0	25	6	2	32	-0.1	1	8	13	KVPVIPPR	KVPVIPPR KVPVIPPR KVPVIPPR	0	0	26	6	2	36
PRELP	Prolargin	PRELP_HUMAN	50Step_Domain_p100.0_to_150.0	100	150	50.0 AA STEP	50	107	87	55	78	58	68	0.3	1	83	68	IHYLYLQNNFITELPVESFQNATGLR LPGLVFLYMEK WINLDNNR IHYLYLQNNFITELPVESFQNATGLR LPGLVFLYMEK WINLDNNR KVPVIPPR LPGLVFLYMEK WINLDNNR	IHYLYLQNNFITELPVESFQNATGLR KVPVIPPR LPGLVFLYMEK WINLDNNR IHYLYLQNNFITELPVESFQNATGLR KVPVIPPR LPGLVFLYMEK WINLDNNR KVPVIPPR LPGLVFLYMEK WINLDNNR	76	60	56	72	76	76
PRELP	Prolargin	PRELP_HUMAN	50Step_Domain_p150.0_to_200.0	150	200	50.0 AA STEP	50	200	202	207	154	176	139	0.94	0.3856	203	156	IPPGVFSK LENLLLLDLQHNR LPGLVFLYMEK NQLEEVPSALPR IPPGVFSK LENLLLLDLQHNR LPGLVFLYMEK LSQNHISR NQLEEVPSALPR IPPGVFSK LENLLLLDLQHNR LPGLVFLYMEK NQLEEVPSALPR	IPPGVFSK LENLLLLDLQHNR LPGLVFLYMEK LSQNHISR NQLEEVPSALPR IPPGVFSK LENLLLLDLQHNR LPGLVFLYMEK NQLEEVPSALPR IPPGVFSK LENLLLLDLQHNR LPGLVFLYMEK NQLEEVPSALPR	142	140	212	142	230	156
PRELP	Prolargin	PRELP_HUMAN	50Step_Domain_p200.0_to_250.0	200	250	50.0 AA STEP	50	273	280	380	320	364	249	0	1	311	311	LENLLLLDLQHNR LSDGVFKPDTFHGLK NLMQLNLAHNILR VPTAIHQLYLDSNK LENLLLLDLQHNR LSDGVFKPDTFHGLK NLMQLNLAHNILR VPTAIHQLYLDSNK LENLLLLDLQHNR LSDGVFKPDTFHGLK NLMQLNLAHNILR VPTAIHQLYLDSNK	LENLLLLDLQHNR LSDGVFKPDTFHGLK NLMQLNLAHNILR VPTAIHQLYLDSNK LENLLLLDLQHNR LSDGVFKPDTFHGLK NLMQLNLAHNILR VPTAIHQLYLDSNK LENLLLLDLQHNR NLMQLNLAHNILR VPTAIHQLYLDSNK	194	194	390	296	476	280
PRELP	Prolargin	PRELP_HUMAN	50Step_Domain_p250.0_to_300.0	250	300	50.0 AA STEP	50	87	115	95	175	126	153	-1.04	0.2232	99	151	IETIPNGYFK SFPNLAFIR VPTAIHQLYLDSNK IETIPNGYFK SFPNLAFIR VPTAIHQLYLDSNK IETIPNGYFK SFPNLAFIR VPTAIHQLYLDSNK	IETIPNGYFK SFPNLAFIR VPTAIHQLYLDSNK IETIPNGYFK SFPNLAFIR VPTAIHQLYLDSNK IETIPNGYFK SFPNLAFIR VPTAIHQLYLDSNK	62	80	98	162	164	172
PRELP	Prolargin	PRELP_HUMAN	50Step_Domain_p300.0_to_350.0	300	350	50.0 AA STEP	50	93	92	55	76	61	151	-0.32	1	80	96	INGTQICPNDLVAFHDFSSDLENVPHLR ISSVPAINNR LEHLYLNNNSIEK INGTQICPNDLVAFHDFSSDLENVPHLR ISSVPAINNR LEHLYLNNNSIEK INGTQICPNDLVAFHDFSSDLENVPHLR ISSVPAINNR LEHLYLNNNSIEK	INGTQICPNDLVAFHDFSSDLENVPHLR ISSVPAINNR LEHLYLNNNSIEK INGTQICPNDLVAFHDFSSDLENVPHLR ISSVPAINNR LEHLYLNNNSIEK ISSVPAINNR LEHLYLNNNSIEK	66	64	56	70	80	170
PRELP	Prolargin	PRELP_HUMAN	50Step_Domain_p350.0_to_382.0	350	382	50.0 AA STEP	32	28	23	2	6	9	0	0.40625	1	18	5	INGTQICPNDLVAFHDFSSDLENVPHLR INGTQICPNDLVAFHDFSSDLENVPHLR INGTQICPNDLVAFHDFSSDLENVPHLR	INGTQICPNDLVAFHDFSSDLENVPHLR INGTQICPNDLVAFHDFSSDLENVPHLR	20	16	2	6	12	0
PRELP	Prolargin	PRELP_HUMAN	80Step_Domain_p0_to_80	0	80	80.0 AA STEP	80	0	0	0	0	0	0	0	1	0	0			0	0	0	0	0	0
PRELP	Prolargin	PRELP_HUMAN	80Step_Domain_p80.0_to_160.0	80	160	80.0 AA STEP	80	135	141	107	117	116	128	0.1	1	128	120	IHYLYLQNNFITELPVESFQNATGLR LPGLVFLYMEK NQLEEVPSALPR WINLDNNR IHYLYLQNNFITELPVESFQNATGLR LPGLVFLYMEK NQLEEVPSALPR WINLDNNR KVPVIPPR LPGLVFLYMEK NQLEEVPSALPR WINLDNNR	IHYLYLQNNFITELPVESFQNATGLR KVPVIPPR LPGLVFLYMEK NQLEEVPSALPR WINLDNNR IHYLYLQNNFITELPVESFQNATGLR KVPVIPPR LPGLVFLYMEK NQLEEVPSALPR WINLDNNR KVPVIPPR LPGLVFLYMEK NQLEEVPSALPR WINLDNNR	96	98	110	108	152	144
PRELP	Prolargin	PRELP_HUMAN	80Step_Domain_p160.0_to_240.0	160	240	80.0 AA STEP	80	343	366	452	391	433	338	0	1	387	387	IPPGVFSK LENLLLLDLQHNR LSDGVFKPDTFHGLK NLMQLNLAHNILR NQLEEVPSALPR VPTAIHQLYLDSNK IPPGVFSK LENLLLLDLQHNR LSDGVFKPDTFHGLK LSQNHISR NLMQLNLAHNILR NQLEEVPSALPR VPTAIHQLYLDSNK IPPGVFSK LENLLLLDLQHNR LSDGVFKPDTFHGLK NLMQLNLAHNILR NQLEEVPSALPR VPTAIHQLYLDSNK	IPPGVFSK LENLLLLDLQHNR LSDGVFKPDTFHGLK LSQNHISR NLMQLNLAHNILR NQLEEVPSALPR VPTAIHQLYLDSNK IPPGVFSK LENLLLLDLQHNR LSDGVFKPDTFHGLK NLMQLNLAHNILR NQLEEVPSALPR VPTAIHQLYLDSNK IPPGVFSK LENLLLLDLQHNR NLMQLNLAHNILR NQLEEVPSALPR VPTAIHQLYLDSNK	244	254	464	362	566	380
PRELP	Prolargin	PRELP_HUMAN	80Step_Domain_p240.0_to_320.0	240	320	80.0 AA STEP	80	152	185	148	244	178	304	-1	0.0665	162	242	IETIPNGYFK ISSVPAINNR LEHLYLNNNSIEK SFPNLAFIR VPTAIHQLYLDSNK IETIPNGYFK ISSVPAINNR LEHLYLNNNSIEK SFPNLAFIR VPTAIHQLYLDSNK IETIPNGYFK ISSVPAINNR LEHLYLNNNSIEK SFPNLAFIR VPTAIHQLYLDSNK	IETIPNGYFK ISSVPAINNR LEHLYLNNNSIEK SFPNLAFIR VPTAIHQLYLDSNK IETIPNGYFK ISSVPAINNR LEHLYLNNNSIEK SFPNLAFIR VPTAIHQLYLDSNK IETIPNGYFK ISSVPAINNR LEHLYLNNNSIEK SFPNLAFIR VPTAIHQLYLDSNK	108	128	152	226	232	342
PRELP	Prolargin	PRELP_HUMAN	80Step_Domain_p320.0_to_382.0	320	382	80.0 AA STEP	62	68	72	43	56	41	135	-0.258065	1	61	77	INGTQICPNDLVAFHDFSSDLENVPHLR LEHLYLNNNSIEK INGTQICPNDLVAFHDFSSDLENVPHLR LEHLYLNNNSIEK INGTQICPNDLVAFHDFSSDLENVPHLR LEHLYLNNNSIEK	INGTQICPNDLVAFHDFSSDLENVPHLR LEHLYLNNNSIEK INGTQICPNDLVAFHDFSSDLENVPHLR LEHLYLNNNSIEK LEHLYLNNNSIEK	48	50	44	52	54	152
PRELP	Prolargin	PRELP_HUMAN	100Step_Domain_p0_to_100	0	100	100.0 AA STEP	100	0	0	25	6	2	32	-0.05	1	8	13	KVPVIPPR	KVPVIPPR KVPVIPPR KVPVIPPR	0	0	26	6	2	36
PRELP	Prolargin	PRELP_HUMAN	100Step_Domain_p100.0_to_200.0	100	200	100.0 AA STEP	100	222	236	247	188	210	190	0.39	0.7692	235	196	IHYLYLQNNFITELPVESFQNATGLR IPPGVFSK LENLLLLDLQHNR LPGLVFLYMEK NQLEEVPSALPR WINLDNNR IHYLYLQNNFITELPVESFQNATGLR IPPGVFSK LENLLLLDLQHNR LPGLVFLYMEK LSQNHISR NQLEEVPSALPR WINLDNNR IPPGVFSK KVPVIPPR LENLLLLDLQHNR LPGLVFLYMEK NQLEEVPSALPR WINLDNNR	IHYLYLQNNFITELPVESFQNATGLR IPPGVFSK KVPVIPPR LENLLLLDLQHNR LPGLVFLYMEK LSQNHISR NQLEEVPSALPR WINLDNNR IHYLYLQNNFITELPVESFQNATGLR IPPGVFSK KVPVIPPR LENLLLLDLQHNR LPGLVFLYMEK NQLEEVPSALPR WINLDNNR IPPGVFSK KVPVIPPR LENLLLLDLQHNR LPGLVFLYMEK NQLEEVPSALPR WINLDNNR	158	164	254	174	274	214
PRELP	Prolargin	PRELP_HUMAN	100Step_Domain_p200.0_to_300.0	200	300	100.0 AA STEP	100	301	306	390	346	383	263	0.01	1	332	331	IETIPNGYFK LENLLLLDLQHNR LSDGVFKPDTFHGLK NLMQLNLAHNILR SFPNLAFIR VPTAIHQLYLDSNK IETIPNGYFK LENLLLLDLQHNR LSDGVFKPDTFHGLK NLMQLNLAHNILR SFPNLAFIR VPTAIHQLYLDSNK IETIPNGYFK LENLLLLDLQHNR LSDGVFKPDTFHGLK NLMQLNLAHNILR SFPNLAFIR VPTAIHQLYLDSNK	IETIPNGYFK LENLLLLDLQHNR LSDGVFKPDTFHGLK NLMQLNLAHNILR SFPNLAFIR VPTAIHQLYLDSNK IETIPNGYFK LENLLLLDLQHNR LSDGVFKPDTFHGLK NLMQLNLAHNILR SFPNLAFIR VPTAIHQLYLDSNK IETIPNGYFK LENLLLLDLQHNR NLMQLNLAHNILR SFPNLAFIR VPTAIHQLYLDSNK	214	212	400	320	500	296
PRELP	Prolargin	PRELP_HUMAN	100Step_Domain_p300.0_to_382.0	300	382	100.0 AA STEP	82	93	92	55	76	61	151	-0.195122	1	80	96	INGTQICPNDLVAFHDFSSDLENVPHLR ISSVPAINNR LEHLYLNNNSIEK INGTQICPNDLVAFHDFSSDLENVPHLR ISSVPAINNR LEHLYLNNNSIEK INGTQICPNDLVAFHDFSSDLENVPHLR ISSVPAINNR LEHLYLNNNSIEK	INGTQICPNDLVAFHDFSSDLENVPHLR ISSVPAINNR LEHLYLNNNSIEK INGTQICPNDLVAFHDFSSDLENVPHLR ISSVPAINNR LEHLYLNNNSIEK ISSVPAINNR LEHLYLNNNSIEK	66	64	56	70	80	170
ABI3BP	Target of Nesh-SH3	D3YTG3_HUMAN	Disordered	315	346	REGIONS	31	0	0	0	0	0	0	0	1	0	0			0	0	0	0	0	0
ABI3BP	Target of Nesh-SH3	D3YTG3_HUMAN	Disordered_433_843	433	843	REGIONS	410	21	0	3	25	15	16	-0.0268293	0.762	8	19	ILDSIPPK LVPATILEPVLR LVPATILEPVLR	ILDSIPPK LVPATILEPVLR TQFISLKPK ILDSIPPK LVPATILEPVLR ILDSIPPK LVPATILEPVLR TQFISLKPK	14	0	2	28	18	22
ABI3BP	Target of Nesh-SH3	D3YTG3_HUMAN	Disordered_879_1028	879	1028	REGIONS	149	3	0	0	4	2	6	-0.0201342	1	1	4	LVPSTDLEPGTLR	LVPSTDLEPGTLR LVPSTDLEPGTLR LVPSTDLEPGTLR	2	0	0	4	2	8
ABI3BP	Target of Nesh-SH3	D3YTG3_HUMAN	Disordered_1041_1079	1041	1079	REGIONS	38	0	0	0	0	0	0	0	1	0	0			0	0	0	0	0	0
ABI3BP	Target of Nesh-SH3	D3YTG3_HUMAN	Disordered_1158_1271	1158	1271	REGIONS	113	0	0	9	5	3	9	-0.0265487	1	3	6	APLWPEEPK	APLWPEEPK APLWPEEPK APLWPEEPK	0	0	6	6	4	12
ABI3BP	Target of Nesh-SH3	D3YTG3_HUMAN	Disordered_1291_1529	1291	1529	REGIONS	238	52	53	19	78	47	60	-0.0882353	0.036	41	62	IETDIKQPTVPASGEELENITDFSSSPTR QPTVPASGEELENITDFSSSPTR YIQKPDNSPCSITDSVK IETDIKQPTVPASGEELENITDFSSSPTR QPTVPASGEELENITDFSSSPTR YIQKPDNSPCSITDSVK QPTVPASGEELENITDFSSSPTR YIQKPDNSPCSITDSVK	IETDIKQPTVPASGEELENITDFSSSPTR QPTVPASGEELENITDFSSSPTR YIQKPDNSPCSITDSVK IETDIKQPTVPASGEELENITDFSSSPTR QPTVPASGEELENITDFSSSPTR YIQKPDNSPCSITDSVK ETDPLGKPR IETDIKQPTVPASGEELENITDFSSSPTR QPTVPASGEELENITDFSSSPTR YIQKPDNSPCSITDSVK	34	38	12	86	58	82
ABI3BP	Target of Nesh-SH3	D3YTG3_HUMAN	Fibronectin type-III	116	214	DOMAINS	98	27	25	25	20	18	19	0.0714286	0.404	26	19	DNVEGGIWSK DNVEGGIWSK DNVEGGIWSK	DNVEGGIWSK DNVEGGIWSK DNVEGGIWSK	18	18	16	22	22	26
ABI3BP	Target of Nesh-SH3	D3YTG3_HUMAN	Fibronectin type-III_1551_1644	1551	1644	DOMAINS	93	64	64	54	58	75	57	-0.0215054	1	61	63	NPLGEGPVSNTVAFSTESADPR NPLGEGPVSNTVAFSTESADPR NPLGEGPVSNTVAFSTESADPR	NPLGEGPVSNTVAFSTESADPR NPLGEGPVSNTVAFSTESADPR NPLGEGPVSNTVAFSTESADPR	42	46	34	64	92	78
ABI3BP	Target of Nesh-SH3	D3YTG3_HUMAN	50Step_Domain_p0_to_50	0	50	50.0 AA STEP	50	3	3	0	0	0	1	0.04	1	2	0	VHINTTSDSILLK VHINTTSDSILLK	FLRPSPNVK	2	2	0	0	0	2
ABI3BP	Target of Nesh-SH3	D3YTG3_HUMAN	50Step_Domain_p50.0_to_100.0	50	100	50.0 AA STEP	50	73	83	95	73	67	54	0.38	0.0324	84	65	FTEAIVDAEPK LEGLLLGYGSNVSPNQYFPLPAEGK FTEAIVDAEPK LEGLLLGYGSNVSPNQYFPLPAEGK YLIVVRPAPPPSQK FTEAIVDAEPK LEGLLLGYGSNVSPNQYFPLPAEGK	FTEAIVDAEPK LEGLLLGYGSNVSPNQYFPLPAEGK YLIVVRPAPPPSQK FTEAIVDAEPK LEGLLLGYGSNVSPNQYFPLPAEGK YLIVVRPAPPPSQK FLRPSPNVK FTEAIVDAEPK LEGLLLGYGSNVSPNQYFPLPAEGK YLIVVRPAPPPSQK	48	60	60	80	82	74
ABI3BP	Target of Nesh-SH3	D3YTG3_HUMAN	50Step_Domain_p100.0_to_150.0	100	150	50.0 AA STEP	50	0	3	0	2	5	1	-0.04	1	1	3	YLIVVRPAPPPSQK	YLIVVRPAPPPSQK YLIVVRPAPPPSQK YLIVVRPAPPPSQK	0	2	0	2	6	2
ABI3BP	Target of Nesh-SH3	D3YTG3_HUMAN	50Step_Domain_p150.0_to_200.0	150	200	50.0 AA STEP	50	27	25	25	20	18	19	0.14	1	26	19	DNVEGGIWSK DNVEGGIWSK DNVEGGIWSK	DNVEGGIWSK DNVEGGIWSK DNVEGGIWSK	18	18	16	22	22	26
ABI3BP	Target of Nesh-SH3	D3YTG3_HUMAN	50Step_Domain_p200.0_to_250.0	200	250	50.0 AA STEP	50	101	92	127	85	81	133	0.14	1	107	100	DNVEGGIWSK IQSTYDQDHTVPAYVPR LIPITIIK DNVEGGIWSK IQSTYDQDHTVPAYVPR LIPITIIK DNVEGGIWSK IQSTYDQDHTVPAYVPR LIPITIIK	DNVEGGIWSK IQSTYDQDHTVPAYVPR LIPITIIK DNVEGGIWSK IQSTYDQDHTVPAYVPR LIPITIIK DNVEGGIWSK IQSTYDQDHTVPAYVPR LIPITIIK	66	66	80	94	100	182
ABI3BP	Target of Nesh-SH3	D3YTG3_HUMAN	50Step_Domain_p250.0_to_300.0	250	300	50.0 AA STEP	50	52	58	35	45	44	16	0.26	0.684	48	35	LPASLMFEISDALK LPASLMFEISDALK LPASLMFEISDALK	LPASLMFEISDALK LPASLMFEISDALK LPASLMFEISDALK	34	42	22	50	54	22
ABI3BP	Target of Nesh-SH3	D3YTG3_HUMAN	50Step_Domain_p300.0_to_350.0	300	350	50.0 AA STEP	50	0	0	0	0	0	0	0	1	0	0			0	0	0	0	0	0
ABI3BP	Target of Nesh-SH3	D3YTG3_HUMAN	50Step_Domain_p350.0_to_400.0	350	400	50.0 AA STEP	50	0	0	0	0	3	4	-0.04	1	0	2		SLPEFPEAK SLPEFPEAK	0	0	0	0	4	6
ABI3BP	Target of Nesh-SH3	D3YTG3_HUMAN	50Step_Domain_p400.0_to_450.0	400	450	50.0 AA STEP	50	0	0	0	0	0	0	0	1	0	0			0	0	0	0	0	0
ABI3BP	Target of Nesh-SH3	D3YTG3_HUMAN	50Step_Domain_p450.0_to_500.0	450	500	50.0 AA STEP	50	15	0	0	16	3	10	-0.1	1	5	10	ILDSIPPK	ILDSIPPK ILDSIPPK ILDSIPPK	10	0	0	18	4	14
ABI3BP	Target of Nesh-SH3	D3YTG3_HUMAN	50Step_Domain_p500.0_to_550.0	500	550	50.0 AA STEP	50	0	0	0	0	0	0	0	1	0	0			0	0	0	0	0	0
ABI3BP	Target of Nesh-SH3	D3YTG3_HUMAN	50Step_Domain_p550.0_to_600.0	550	600	50.0 AA STEP	50	0	0	0	2	0	1	-0.02	1	0	1		TQFISLKPK TQFISLKPK	0	0	0	2	0	2
ABI3BP	Target of Nesh-SH3	D3YTG3_HUMAN	50Step_Domain_p600.0_to_650.0	600	650	50.0 AA STEP	50	0	0	0	0	0	0	0	1	0	0			0	0	0	0	0	0
ABI3BP	Target of Nesh-SH3	D3YTG3_HUMAN	50Step_Domain_p650.0_to_700.0	650	700	50.0 AA STEP	50	0	0	0	0	0	0	0	1	0	0			0	0	0	0	0	0
ABI3BP	Target of Nesh-SH3	D3YTG3_HUMAN	50Step_Domain_p700.0_to_750.0	700	750	50.0 AA STEP	50	0	0	0	0	0	0	0	1	0	0			0	0	0	0	0	0
ABI3BP	Target of Nesh-SH3	D3YTG3_HUMAN	50Step_Domain_p750.0_to_800.0	750	800	50.0 AA STEP	50	6	0	3	7	11	4	-0.08	1	3	7	LVPATILEPVLR LVPATILEPVLR	LVPATILEPVLR LVPATILEPVLR LVPATILEPVLR	4	0	2	8	14	6
ABI3BP	Target of Nesh-SH3	D3YTG3_HUMAN	50Step_Domain_p800.0_to_850.0	800	850	50.0 AA STEP	50	6	0	3	7	11	4	-0.08	1	3	7	LVPATILEPVLR LVPATILEPVLR	LVPATILEPVLR LVPATILEPVLR LVPATILEPVLR	4	0	2	8	14	6
ABI3BP	Target of Nesh-SH3	D3YTG3_HUMAN	50Step_Domain_p850.0_to_900.0	850	900	50.0 AA STEP	50	0	0	0	0	0	0	0	1	0	0			0	0	0	0	0	0
ABI3BP	Target of Nesh-SH3	D3YTG3_HUMAN	50Step_Domain_p900.0_to_950.0	900	950	50.0 AA STEP	50	0	0	0	0	0	0	0	1	0	0			0	0	0	0	0	0
ABI3BP	Target of Nesh-SH3	D3YTG3_HUMAN	50Step_Domain_p950.0_to_1000.0	950	1000	50.0 AA STEP	50	0	0	0	0	0	0	0	1	0	0			0	0	0	0	0	0
ABI3BP	Target of Nesh-SH3	D3YTG3_HUMAN	50Step_Domain_p1000.0_to_1050.0	1000	1050	50.0 AA STEP	50	3	0	0	4	2	6	-0.06	1	1	4	LVPSTDLEPGTLR	LVPSTDLEPGTLR LVPSTDLEPGTLR LVPSTDLEPGTLR	2	0	0	4	2	8
ABI3BP	Target of Nesh-SH3	D3YTG3_HUMAN	50Step_Domain_p1050.0_to_1100.0	1050	1100	50.0 AA STEP	50	0	0	0	0	0	0	0	1	0	0			0	0	0	0	0	0
ABI3BP	Target of Nesh-SH3	D3YTG3_HUMAN	50Step_Domain_p1100.0_to_1150.0	1100	1150	50.0 AA STEP	50	0	0	0	0	0	0	0	1	0	0			0	0	0	0	0	0
ABI3BP	Target of Nesh-SH3	D3YTG3_HUMAN	50Step_Domain_p1150.0_to_1200.0	1150	1200	50.0 AA STEP	50	0	0	9	5	3	9	-0.06	1	3	6	APLWPEEPK	APLWPEEPK APLWPEEPK APLWPEEPK	0	0	6	6	4	12
ABI3BP	Target of Nesh-SH3	D3YTG3_HUMAN	50Step_Domain_p1200.0_to_1250.0	1200	1250	50.0 AA STEP	50	0	0	0	0	0	0	0	1	0	0			0	0	0	0	0	0
ABI3BP	Target of Nesh-SH3	D3YTG3_HUMAN	50Step_Domain_p1250.0_to_1300.0	1250	1300	50.0 AA STEP	50	0	0	0	0	0	0	0	1	0	0			0	0	0	0	0	0
ABI3BP	Target of Nesh-SH3	D3YTG3_HUMAN	50Step_Domain_p1300.0_to_1350.0	1300	1350	50.0 AA STEP	50	0	0	0	0	0	0	0	1	0	0			0	0	0	0	0	0
ABI3BP	Target of Nesh-SH3	D3YTG3_HUMAN	50Step_Domain_p1350.0_to_1400.0	1350	1400	50.0 AA STEP	50	0	0	0	0	0	0	0	1	0	0			0	0	0	0	0	0
ABI3BP	Target of Nesh-SH3	D3YTG3_HUMAN	50Step_Domain_p1400.0_to_1450.0	1400	1450	50.0 AA STEP	50	0	0	0	0	0	0	0	1	0	0			0	0	0	0	0	0
ABI3BP	Target of Nesh-SH3	D3YTG3_HUMAN	50Step_Domain_p1450.0_to_1500.0	1450	1500	50.0 AA STEP	50	15	11	6	31	29	35	-0.42	0.0108	11	32	IETDIKQPTVPASGEELENITDFSSSPTR QPTVPASGEELENITDFSSSPTR IETDIKQPTVPASGEELENITDFSSSPTR QPTVPASGEELENITDFSSSPTR QPTVPASGEELENITDFSSSPTR	IETDIKQPTVPASGEELENITDFSSSPTR QPTVPASGEELENITDFSSSPTR IETDIKQPTVPASGEELENITDFSSSPTR QPTVPASGEELENITDFSSSPTR ETDPLGKPR IETDIKQPTVPASGEELENITDFSSSPTR QPTVPASGEELENITDFSSSPTR	10	8	4	34	36	48
ABI3BP	Target of Nesh-SH3	D3YTG3_HUMAN	50Step_Domain_p1500.0_to_1550.0	1500	1550	50.0 AA STEP	50	37	42	13	47	18	42	-0.1	1	31	36	YIQKPDNSPCSITDSVK YIQKPDNSPCSITDSVK YIQKPDNSPCSITDSVK	YIQKPDNSPCSITDSVK YIQKPDNSPCSITDSVK ETDPLGKPR YIQKPDNSPCSITDSVK	24	30	8	52	22	58
ABI3BP	Target of Nesh-SH3	D3YTG3_HUMAN	50Step_Domain_p1550.0_to_1600.0	1550	1600	50.0 AA STEP	50	0	0	0	0	0	0	0	1	0	0			0	0	0	0	0	0
ABI3BP	Target of Nesh-SH3	D3YTG3_HUMAN	50Step_Domain_p1600.0_to_1650.0	1600	1650	50.0 AA STEP	50	64	64	57	58	86	63	-0.14	1	62	69	NPLGEGPVSNTVAFSTESADPR NPLGEGPVSNTVAFSTESADPR NPLGEGPVSNTVAFSTESADPR VSEPVSAGR	NPLGEGPVSNTVAFSTESADPR NPLGEGPVSNTVAFSTESADPR VSEPVSAGR NPLGEGPVSNTVAFSTESADPR VSEPVSAGR	42	46	36	64	106	86
ABI3BP	Target of Nesh-SH3	D3YTG3_HUMAN	50Step_Domain_p1650.0_to_1700.0	1650	1700	50.0 AA STEP	50	55	47	73	42	70	44	0.12	1	58	52	DAIWTERPFNSDSYSECK FVGVQLCNSLR IYLSDSLTGK DAIWTERPFNSDSYSECK FVGVQLCNSLR IYLSDSLTGK DAIWTERPFNSDSYSECK FVGVQLCNSLR IYLSDSLTGK VSEPVSAGR	DAIWTERPFNSDSYSECK FVGVQLCNSLR IYLSDSLTGK DAIWTERPFNSDSYSECK FVGVQLCNSLR IYLSDSLTGK VSEPVSAGR DAIWTERPFNSDSYSECK FVGVQLCNSLR IYLSDSLTGK VSEPVSAGR	36	34	46	46	86	60
ABI3BP	Target of Nesh-SH3	D3YTG3_HUMAN	50Step_Domain_p1700.0_to_1750.0	1700	1750	50.0 AA STEP	50	88	94	114	67	76	66	0.58	0	99	70	FYNIGDQR IYLSDSLTGK TGQQLTSDQLPIK TGQQLTSDQLPIKEGYFR FYNIGDQR GHGEDHCQFVDSFLDGR IYLSDSLTGK TGQQLTSDQLPIK FYNIGDQR IYLSDSLTGK TGQQLTSDQLPIK	FYNIGDQR GHGEDHCQFVDSFLDGR IYLSDSLTGK TGQQLTSDQLPIK TGQQLTSDQLPIKEGYFR FYNIGDQR GHGEDHCQFVDSFLDGR IYLSDSLTGK TGQQLTSDQLPIK TGQQLTSDQLPIKEGYFR FYNIGDQR IYLSDSLTGK TGQQLTSDQLPIK	58	68	72	74	94	90
ABI3BP	Target of Nesh-SH3	D3YTG3_HUMAN	50Step_Domain_p1750.0_to_1786.0	1750	1786	50.0 AA STEP	36	3	3	0	2	3	0	0	1	2	2	TGQQLTSDQLPIKEGYFR AVRQEPVQFGEIGGHTQINYVQWYECGTTIPGK	TGQQLTSDQLPIKEGYFR TGQQLTSDQLPIKEGYFR	2	2	0	2	4	0
ABI3BP	Target of Nesh-SH3	D3YTG3_HUMAN	80Step_Domain_p0_to_80	0	80	80.0 AA STEP	80	15	19	22	9	13	12	0.1	1	19	11	LEGLLLGYGSNVSPNQYFPLPAEGK VHINTTSDSILLK LEGLLLGYGSNVSPNQYFPLPAEGK VHINTTSDSILLK LEGLLLGYGSNVSPNQYFPLPAEGK	LEGLLLGYGSNVSPNQYFPLPAEGK LEGLLLGYGSNVSPNQYFPLPAEGK FLRPSPNVK LEGLLLGYGSNVSPNQYFPLPAEGK	10	14	14	10	16	16
ABI3BP	Target of Nesh-SH3	D3YTG3_HUMAN	80Step_Domain_p80.0_to_160.0	80	160	80.0 AA STEP	80	61	67	73	63	54	42	0.175	1	67	53	FTEAIVDAEPK FTEAIVDAEPK YLIVVRPAPPPSQK FTEAIVDAEPK	FTEAIVDAEPK YLIVVRPAPPPSQK FTEAIVDAEPK YLIVVRPAPPPSQK FTEAIVDAEPK YLIVVRPAPPPSQK	40	48	46	70	66	58
ABI3BP	Target of Nesh-SH3	D3YTG3_HUMAN	80Step_Domain_p160.0_to_240.0	160	240	80.0 AA STEP	80	101	92	127	85	81	133	0.0875	1	107	100	DNVEGGIWSK IQSTYDQDHTVPAYVPR LIPITIIK DNVEGGIWSK IQSTYDQDHTVPAYVPR LIPITIIK DNVEGGIWSK IQSTYDQDHTVPAYVPR LIPITIIK	DNVEGGIWSK IQSTYDQDHTVPAYVPR LIPITIIK DNVEGGIWSK IQSTYDQDHTVPAYVPR LIPITIIK DNVEGGIWSK IQSTYDQDHTVPAYVPR LIPITIIK	66	66	80	94	100	182
ABI3BP	Target of Nesh-SH3	D3YTG3_HUMAN	80Step_Domain_p240.0_to_320.0	240	320	80.0 AA STEP	80	61	67	44	53	52	19	0.2	0.7521	57	41	LIPITIIK LPASLMFEISDALK LIPITIIK LPASLMFEISDALK LIPITIIK LPASLMFEISDALK	LIPITIIK LPASLMFEISDALK LIPITIIK LPASLMFEISDALK LIPITIIK LPASLMFEISDALK	40	48	28	58	64	26
ABI3BP	Target of Nesh-SH3	D3YTG3_HUMAN	80Step_Domain_p320.0_to_400.0	320	400	80.0 AA STEP	80	0	0	0	0	3	4	-0.025	1	0	2		SLPEFPEAK SLPEFPEAK	0	0	0	0	4	6
ABI3BP	Target of Nesh-SH3	D3YTG3_HUMAN	80Step_Domain_p400.0_to_480.0	400	480	80.0 AA STEP	80	15	0	0	16	3	10	-0.0625	1	5	10	ILDSIPPK	ILDSIPPK ILDSIPPK ILDSIPPK	10	0	0	18	4	14
ABI3BP	Target of Nesh-SH3	D3YTG3_HUMAN	80Step_Domain_p480.0_to_560.0	480	560	80.0 AA STEP	80	0	0	0	2	0	1	-0.0125	1	0	1		TQFISLKPK TQFISLKPK	0	0	0	2	0	2
ABI3BP	Target of Nesh-SH3	D3YTG3_HUMAN	80Step_Domain_p560.0_to_640.0	560	640	80.0 AA STEP	80	0	0	0	2	0	1	-0.0125	1	0	1		TQFISLKPK TQFISLKPK	0	0	0	2	0	2
ABI3BP	Target of Nesh-SH3	D3YTG3_HUMAN	80Step_Domain_p640.0_to_720.0	640	720	80.0 AA STEP	80	0	0	0	0	0	0	0	1	0	0			0	0	0	0	0	0
ABI3BP	Target of Nesh-SH3	D3YTG3_HUMAN	80Step_Domain_p720.0_to_800.0	720	800	80.0 AA STEP	80	6	0	3	7	11	4	-0.05	1	3	7	LVPATILEPVLR LVPATILEPVLR	LVPATILEPVLR LVPATILEPVLR LVPATILEPVLR	4	0	2	8	14	6
ABI3BP	Target of Nesh-SH3	D3YTG3_HUMAN	80Step_Domain_p800.0_to_880.0	800	880	80.0 AA STEP	80	6	0	3	7	11	4	-0.05	1	3	7	LVPATILEPVLR LVPATILEPVLR	LVPATILEPVLR LVPATILEPVLR LVPATILEPVLR	4	0	2	8	14	6
ABI3BP	Target of Nesh-SH3	D3YTG3_HUMAN	80Step_Domain_p880.0_to_960.0	880	960	80.0 AA STEP	80	0	0	0	0	0	0	0	1	0	0			0	0	0	0	0	0
ABI3BP	Target of Nesh-SH3	D3YTG3_HUMAN	80Step_Domain_p960.0_to_1040.0	960	1040	80.0 AA STEP	80	3	0	0	4	2	6	-0.0375	1	1	4	LVPSTDLEPGTLR	LVPSTDLEPGTLR LVPSTDLEPGTLR LVPSTDLEPGTLR	2	0	0	4	2	8
ABI3BP	Target of Nesh-SH3	D3YTG3_HUMAN	80Step_Domain_p1040.0_to_1120.0	1040	1120	80.0 AA STEP	80	0	0	0	0	0	0	0	1	0	0			0	0	0	0	0	0
ABI3BP	Target of Nesh-SH3	D3YTG3_HUMAN	80Step_Domain_p1120.0_to_1200.0	1120	1200	80.0 AA STEP	80	0	0	9	5	3	9	-0.0375	1	3	6	APLWPEEPK	APLWPEEPK APLWPEEPK APLWPEEPK	0	0	6	6	4	12
ABI3BP	Target of Nesh-SH3	D3YTG3_HUMAN	80Step_Domain_p1200.0_to_1280.0	1200	1280	80.0 AA STEP	80	0	0	0	0	0	0	0	1	0	0			0	0	0	0	0	0
ABI3BP	Target of Nesh-SH3	D3YTG3_HUMAN	80Step_Domain_p1280.0_to_1360.0	1280	1360	80.0 AA STEP	80	0	0	0	0	0	0	0	1	0	0			0	0	0	0	0	0
ABI3BP	Target of Nesh-SH3	D3YTG3_HUMAN	80Step_Domain_p1360.0_to_1440.0	1360	1440	80.0 AA STEP	80	0	0	0	0	0	0	0	1	0	0			0	0	0	0	0	0
ABI3BP	Target of Nesh-SH3	D3YTG3_HUMAN	80Step_Domain_p1440.0_to_1520.0	1440	1520	80.0 AA STEP	80	52	53	19	78	47	60	-0.2625	0.1633	41	62	IETDIKQPTVPASGEELENITDFSSSPTR QPTVPASGEELENITDFSSSPTR YIQKPDNSPCSITDSVK IETDIKQPTVPASGEELENITDFSSSPTR QPTVPASGEELENITDFSSSPTR YIQKPDNSPCSITDSVK QPTVPASGEELENITDFSSSPTR YIQKPDNSPCSITDSVK	IETDIKQPTVPASGEELENITDFSSSPTR QPTVPASGEELENITDFSSSPTR YIQKPDNSPCSITDSVK IETDIKQPTVPASGEELENITDFSSSPTR QPTVPASGEELENITDFSSSPTR YIQKPDNSPCSITDSVK ETDPLGKPR IETDIKQPTVPASGEELENITDFSSSPTR QPTVPASGEELENITDFSSSPTR YIQKPDNSPCSITDSVK	34	38	12	86	58	82
ABI3BP	Target of Nesh-SH3	D3YTG3_HUMAN	80Step_Domain_p1520.0_to_1600.0	1520	1600	80.0 AA STEP	80	37	42	13	47	18	25	0.0125	1	31	30	YIQKPDNSPCSITDSVK YIQKPDNSPCSITDSVK YIQKPDNSPCSITDSVK	YIQKPDNSPCSITDSVK YIQKPDNSPCSITDSVK YIQKPDNSPCSITDSVK	24	30	8	52	22	34
ABI3BP	Target of Nesh-SH3	D3YTG3_HUMAN	80Step_Domain_p1600.0_to_1680.0	1600	1680	80.0 AA STEP	80	67	69	63	60	88	69	-0.075	1	66	72	DAIWTERPFNSDSYSECK NPLGEGPVSNTVAFSTESADPR DAIWTERPFNSDSYSECK NPLGEGPVSNTVAFSTESADPR DAIWTERPFNSDSYSECK NPLGEGPVSNTVAFSTESADPR VSEPVSAGR	DAIWTERPFNSDSYSECK NPLGEGPVSNTVAFSTESADPR DAIWTERPFNSDSYSECK NPLGEGPVSNTVAFSTESADPR VSEPVSAGR DAIWTERPFNSDSYSECK NPLGEGPVSNTVAFSTESADPR VSEPVSAGR	44	50	40	66	108	94
ABI3BP	Target of Nesh-SH3	D3YTG3_HUMAN	80Step_Domain_p1680.0_to_1760.0	1680	1760	80.0 AA STEP	80	107	117	130	80	104	73	0.4	0	118	86	FVGVQLCNSLR FYNIGDQR IYLSDSLTGK TGQQLTSDQLPIK TGQQLTSDQLPIKEGYFR AVRQEPVQFGEIGGHTQINYVQWYECGTTIPGK FVGVQLCNSLR FYNIGDQR GHGEDHCQFVDSFLDGR IYLSDSLTGK TGQQLTSDQLPIK FVGVQLCNSLR FYNIGDQR IYLSDSLTGK TGQQLTSDQLPIK	FVGVQLCNSLR FYNIGDQR GHGEDHCQFVDSFLDGR IYLSDSLTGK TGQQLTSDQLPIK TGQQLTSDQLPIKEGYFR FVGVQLCNSLR FYNIGDQR GHGEDHCQFVDSFLDGR IYLSDSLTGK TGQQLTSDQLPIK TGQQLTSDQLPIKEGYFR FVGVQLCNSLR FYNIGDQR IYLSDSLTGK TGQQLTSDQLPIK	70	84	82	88	128	100
ABI3BP	Target of Nesh-SH3	D3YTG3_HUMAN	80Step_Domain_p1760.0_to_1786.0	1760	1786	80.0 AA STEP	26	0	3	0	0	0	0	0.0384615	1	1	0	AVRQEPVQFGEIGGHTQINYVQWYECGTTIPGK		0	2	0	0	0	0
ABI3BP	Target of Nesh-SH3	D3YTG3_HUMAN	100Step_Domain_p0_to_100	0	100	100.0 AA STEP	100	76	86	95	73	67	54	0.21	0.018	86	65	FTEAIVDAEPK LEGLLLGYGSNVSPNQYFPLPAEGK VHINTTSDSILLK FTEAIVDAEPK LEGLLLGYGSNVSPNQYFPLPAEGK VHINTTSDSILLK YLIVVRPAPPPSQK FTEAIVDAEPK LEGLLLGYGSNVSPNQYFPLPAEGK	FTEAIVDAEPK LEGLLLGYGSNVSPNQYFPLPAEGK YLIVVRPAPPPSQK FTEAIVDAEPK LEGLLLGYGSNVSPNQYFPLPAEGK YLIVVRPAPPPSQK FLRPSPNVK FTEAIVDAEPK LEGLLLGYGSNVSPNQYFPLPAEGK YLIVVRPAPPPSQK	50	62	60	80	82	74
ABI3BP	Target of Nesh-SH3	D3YTG3_HUMAN	100Step_Domain_p100.0_to_200.0	100	200	100.0 AA STEP	100	27	28	25	22	23	20	0.05	1	27	22	DNVEGGIWSK DNVEGGIWSK YLIVVRPAPPPSQK DNVEGGIWSK	DNVEGGIWSK YLIVVRPAPPPSQK DNVEGGIWSK YLIVVRPAPPPSQK DNVEGGIWSK YLIVVRPAPPPSQK	18	20	16	24	28	28
ABI3BP	Target of Nesh-SH3	D3YTG3_HUMAN	100Step_Domain_p200.0_to_300.0	200	300	100.0 AA STEP	100	152	150	161	131	125	149	0.19	0.0414	154	135	DNVEGGIWSK IQSTYDQDHTVPAYVPR LIPITIIK LPASLMFEISDALK DNVEGGIWSK IQSTYDQDHTVPAYVPR LIPITIIK LPASLMFEISDALK DNVEGGIWSK IQSTYDQDHTVPAYVPR LIPITIIK LPASLMFEISDALK	DNVEGGIWSK IQSTYDQDHTVPAYVPR LIPITIIK LPASLMFEISDALK DNVEGGIWSK IQSTYDQDHTVPAYVPR LIPITIIK LPASLMFEISDALK DNVEGGIWSK IQSTYDQDHTVPAYVPR LIPITIIK LPASLMFEISDALK	100	108	102	144	154	204
ABI3BP	Target of Nesh-SH3	D3YTG3_HUMAN	100Step_Domain_p300.0_to_400.0	300	400	100.0 AA STEP	100	0	0	0	0	3	4	-0.02	1	0	2		SLPEFPEAK SLPEFPEAK	0	0	0	0	4	6
ABI3BP	Target of Nesh-SH3	D3YTG3_HUMAN	100Step_Domain_p400.0_to_500.0	400	500	100.0 AA STEP	100	15	0	0	16	3	10	-0.05	1	5	10	ILDSIPPK	ILDSIPPK ILDSIPPK ILDSIPPK	10	0	0	18	4	14
ABI3BP	Target of Nesh-SH3	D3YTG3_HUMAN	100Step_Domain_p500.0_to_600.0	500	600	100.0 AA STEP	100	0	0	0	2	0	1	-0.01	1	0	1		TQFISLKPK TQFISLKPK	0	0	0	2	0	2
ABI3BP	Target of Nesh-SH3	D3YTG3_HUMAN	100Step_Domain_p600.0_to_700.0	600	700	100.0 AA STEP	100	0	0	0	0	0	0	0	1	0	0			0	0	0	0	0	0
ABI3BP	Target of Nesh-SH3	D3YTG3_HUMAN	100Step_Domain_p700.0_to_800.0	700	800	100.0 AA STEP	100	6	0	3	7	11	4	-0.04	1	3	7	LVPATILEPVLR LVPATILEPVLR	LVPATILEPVLR LVPATILEPVLR LVPATILEPVLR	4	0	2	8	14	6
ABI3BP	Target of Nesh-SH3	D3YTG3_HUMAN	100Step_Domain_p800.0_to_900.0	800	900	100.0 AA STEP	100	6	0	3	7	11	4	-0.04	1	3	7	LVPATILEPVLR LVPATILEPVLR	LVPATILEPVLR LVPATILEPVLR LVPATILEPVLR	4	0	2	8	14	6
ABI3BP	Target of Nesh-SH3	D3YTG3_HUMAN	100Step_Domain_p900.0_to_1000.0	900	1000	100.0 AA STEP	100	0	0	0	0	0	0	0	1	0	0			0	0	0	0	0	0
ABI3BP	Target of Nesh-SH3	D3YTG3_HUMAN	100Step_Domain_p1000.0_to_1100.0	1000	1100	100.0 AA STEP	100	3	0	0	4	2	6	-0.03	1	1	4	LVPSTDLEPGTLR	LVPSTDLEPGTLR LVPSTDLEPGTLR LVPSTDLEPGTLR	2	0	0	4	2	8
ABI3BP	Target of Nesh-SH3	D3YTG3_HUMAN	100Step_Domain_p1100.0_to_1200.0	1100	1200	100.0 AA STEP	100	0	0	9	5	3	9	-0.03	1	3	6	APLWPEEPK	APLWPEEPK APLWPEEPK APLWPEEPK	0	0	6	6	4	12
ABI3BP	Target of Nesh-SH3	D3YTG3_HUMAN	100Step_Domain_p1200.0_to_1300.0	1200	1300	100.0 AA STEP	100	0	0	0	0	0	0	0	1	0	0			0	0	0	0	0	0
ABI3BP	Target of Nesh-SH3	D3YTG3_HUMAN	100Step_Domain_p1300.0_to_1400.0	1300	1400	100.0 AA STEP	100	0	0	0	0	0	0	0	1	0	0			0	0	0	0	0	0
ABI3BP	Target of Nesh-SH3	D3YTG3_HUMAN	100Step_Domain_p1400.0_to_1500.0	1400	1500	100.0 AA STEP	100	15	11	6	31	29	35	-0.21	0.018	11	32	IETDIKQPTVPASGEELENITDFSSSPTR QPTVPASGEELENITDFSSSPTR IETDIKQPTVPASGEELENITDFSSSPTR QPTVPASGEELENITDFSSSPTR QPTVPASGEELENITDFSSSPTR	IETDIKQPTVPASGEELENITDFSSSPTR QPTVPASGEELENITDFSSSPTR IETDIKQPTVPASGEELENITDFSSSPTR QPTVPASGEELENITDFSSSPTR ETDPLGKPR IETDIKQPTVPASGEELENITDFSSSPTR QPTVPASGEELENITDFSSSPTR	10	8	4	34	36	48
ABI3BP	Target of Nesh-SH3	D3YTG3_HUMAN	100Step_Domain_p1500.0_to_1600.0	1500	1600	100.0 AA STEP	100	37	42	13	47	18	42	-0.05	1	31	36	YIQKPDNSPCSITDSVK YIQKPDNSPCSITDSVK YIQKPDNSPCSITDSVK	YIQKPDNSPCSITDSVK YIQKPDNSPCSITDSVK ETDPLGKPR YIQKPDNSPCSITDSVK	24	30	8	52	22	58
ABI3BP	Target of Nesh-SH3	D3YTG3_HUMAN	100Step_Domain_p1600.0_to_1700.0	1600	1700	100.0 AA STEP	100	119	111	127	100	145	101	0.04	1	119	115	DAIWTERPFNSDSYSECK FVGVQLCNSLR IYLSDSLTGK NPLGEGPVSNTVAFSTESADPR DAIWTERPFNSDSYSECK FVGVQLCNSLR IYLSDSLTGK NPLGEGPVSNTVAFSTESADPR DAIWTERPFNSDSYSECK FVGVQLCNSLR IYLSDSLTGK NPLGEGPVSNTVAFSTESADPR VSEPVSAGR	DAIWTERPFNSDSYSECK FVGVQLCNSLR IYLSDSLTGK NPLGEGPVSNTVAFSTESADPR DAIWTERPFNSDSYSECK FVGVQLCNSLR IYLSDSLTGK NPLGEGPVSNTVAFSTESADPR VSEPVSAGR DAIWTERPFNSDSYSECK FVGVQLCNSLR IYLSDSLTGK NPLGEGPVSNTVAFSTESADPR VSEPVSAGR	78	80	80	110	178	138
ABI3BP	Target of Nesh-SH3	D3YTG3_HUMAN	100Step_Domain_p1700.0_to_1786.0	1700	1786	100.0 AA STEP	86	88	97	114	67	76	66	0.348837	0	100	70	FYNIGDQR IYLSDSLTGK TGQQLTSDQLPIK TGQQLTSDQLPIKEGYFR AVRQEPVQFGEIGGHTQINYVQWYECGTTIPGK FYNIGDQR GHGEDHCQFVDSFLDGR IYLSDSLTGK TGQQLTSDQLPIK FYNIGDQR IYLSDSLTGK TGQQLTSDQLPIK	FYNIGDQR GHGEDHCQFVDSFLDGR IYLSDSLTGK TGQQLTSDQLPIK TGQQLTSDQLPIKEGYFR FYNIGDQR GHGEDHCQFVDSFLDGR IYLSDSLTGK TGQQLTSDQLPIK TGQQLTSDQLPIKEGYFR FYNIGDQR IYLSDSLTGK TGQQLTSDQLPIK	58	70	72	74	94	90
N/A	GCT-A9 light chain variable region	A0A125QYY5_HUMAN	50Step_Domain_p0_to_50	0	50	50.0 AA STEP	50	15	15	0	0	0	0	0.2	0.0147	10	0	DIQMTQSPSSLSASVGDR LLIYDASNLETGVPSR DIQMTQSPSSLSASVGDR LLIYDASNLETGVPSR		22	30	0	0	0	0
N/A	GCT-A9 light chain variable region	A0A125QYY5_HUMAN	50Step_Domain_p50.0_to_100.0	50	100	50.0 AA STEP	50	1	2	0	0	0	0	0.02	1	1	0	LLIYDASNLETGVPSR LLIYDASNLETGVPSR		2	4	0	0	0	0
N/A	GCT-A9 light chain variable region	A0A125QYY5_HUMAN	50Step_Domain_p100.0_to_107.0	100	107	50.0 AA STEP	7	0	0	0	0	0	0	0	1	0	0			0	0	0	0	0	0
N/A	GCT-A9 light chain variable region	A0A125QYY5_HUMAN	80Step_Domain_p0_to_80	0	80	80.0 AA STEP	80	15	15	0	0	0	0	0.125	0.0444	10	0	DIQMTQSPSSLSASVGDR LLIYDASNLETGVPSR DIQMTQSPSSLSASVGDR LLIYDASNLETGVPSR		22	30	0	0	0	0
N/A	GCT-A9 light chain variable region	A0A125QYY5_HUMAN	80Step_Domain_p80.0_to_107.0	80	107	80.0 AA STEP	27	0	0	0	0	0	0	0	1	0	0			0	0	0	0	0	0
N/A	GCT-A9 light chain variable region	A0A125QYY5_HUMAN	100Step_Domain_p0_to_100	0	100	100.0 AA STEP	100	15	15	0	0	0	0	0.1	0.0444	10	0	DIQMTQSPSSLSASVGDR LLIYDASNLETGVPSR DIQMTQSPSSLSASVGDR LLIYDASNLETGVPSR		22	30	0	0	0	0
N/A	GCT-A9 light chain variable region	A0A125QYY5_HUMAN	100Step_Domain_p100.0_to_107.0	100	107	100.0 AA STEP	7	0	0	0	0	0	0	0	1	0	0			0	0	0	0	0	0
N/A	Liver histone H1e	A3R0T7_HUMAN	Disordered	1	41	REGIONS	40	4	3	8	8	8	8	-0.075	0.0688	5	8	ASGPPVSELITK ASGPPVSELITK ASGPPVSELITK	ASGPPVSELITK ASGPPVSELITK ASGPPVSELITK	4	2	10	8	10	6
N/A	Liver histone H1e	A3R0T7_HUMAN	Disordered_83_219	83	219	REGIONS	136	0	0	0	0	2	0	-0.00735294	1	0	1		GTGASGSFK	0	0	0	0	2	0
N/A	Liver histone H1e	A3R0T7_HUMAN	50Step_Domain_p0_to_50	0	50	50.0 AA STEP	50	4	3	8	8	8	8	-0.06	0.038	5	8	ASGPPVSELITK ASGPPVSELITK ASGPPVSELITK	ASGPPVSELITK ASGPPVSELITK ASGPPVSELITK	4	2	10	8	10	6
N/A	Liver histone H1e	A3R0T7_HUMAN	50Step_Domain_p50.0_to_100.0	50	100	50.0 AA STEP	50	11	12	7	8	8	8	0.04	0.3095	10	8	ALAAAGYDVEK SGVSLAALK ALAAAGYDVEK SGVSLAALK ALAAAGYDVEK SGVSLAALK	ALAAAGYDVEK SGVSLAALK ALAAAGYDVEK GTGASGSFK SGVSLAALK ALAAAGYDVEK SGVSLAALK	12	8	8	8	10	6
N/A	Liver histone H1e	A3R0T7_HUMAN	50Step_Domain_p100.0_to_150.0	100	150	50.0 AA STEP	50	0	0	0	0	2	0	-0.02	1	0	1		GTGASGSFK	0	0	0	0	2	0
N/A	Liver histone H1e	A3R0T7_HUMAN	50Step_Domain_p150.0_to_200.0	150	200	50.0 AA STEP	50	0	0	0	0	0	0	0	1	0	0			0	0	0	0	0	0
N/A	Liver histone H1e	A3R0T7_HUMAN	50Step_Domain_p200.0_to_219.0	200	219	50.0 AA STEP	19	0	0	0	0	0	0	0	1	0	0			0	0	0	0	0	0
N/A	Liver histone H1e	A3R0T7_HUMAN	80Step_Domain_p0_to_80	0	80	80.0 AA STEP	80	15	15	15	15	14	15	0	1	15	15	ALAAAGYDVEK ASGPPVSELITK SGVSLAALK ALAAAGYDVEK ASGPPVSELITK SGVSLAALK ALAAAGYDVEK ASGPPVSELITK SGVSLAALK	ALAAAGYDVEK ASGPPVSELITK SGVSLAALK ALAAAGYDVEK ASGPPVSELITK SGVSLAALK ALAAAGYDVEK ASGPPVSELITK SGVSLAALK	16	10	18	16	18	12
N/A	Liver histone H1e	A3R0T7_HUMAN	80Step_Domain_p80.0_to_160.0	80	160	80.0 AA STEP	80	0	0	0	0	2	0	-0.0125	0.4419	0	1		GTGASGSFK	0	0	0	0	2	0
N/A	Liver histone H1e	A3R0T7_HUMAN	80Step_Domain_p160.0_to_219.0	160	219	80.0 AA STEP	59	0	0	0	0	0	0	0	1	0	0			0	0	0	0	0	0
N/A	Liver histone H1e	A3R0T7_HUMAN	100Step_Domain_p0_to_100	0	100	100.0 AA STEP	100	15	15	15	15	15	15	0	1	15	15	ALAAAGYDVEK ASGPPVSELITK SGVSLAALK ALAAAGYDVEK ASGPPVSELITK SGVSLAALK ALAAAGYDVEK ASGPPVSELITK SGVSLAALK	ALAAAGYDVEK ASGPPVSELITK SGVSLAALK ALAAAGYDVEK ASGPPVSELITK GTGASGSFK SGVSLAALK ALAAAGYDVEK ASGPPVSELITK SGVSLAALK	16	10	18	16	20	12
N/A	Liver histone H1e	A3R0T7_HUMAN	100Step_Domain_p100.0_to_200.0	100	200	100.0 AA STEP	100	0	0	0	0	2	0	-0.01	0.3267	0	1		GTGASGSFK	0	0	0	0	2	0
N/A	Liver histone H1e	A3R0T7_HUMAN	100Step_Domain_p200.0_to_219.0	200	219	100.0 AA STEP	19	0	0	0	0	0	0	0	1	0	0			0	0	0	0	0	0
CFH	Complement factor H	CFAH_HUMAN	Sushi 1	19	82	DOMAINS	63	10	27	36	44	71	53	-0.507937	0	24	56	GEWVALNPLR NTEILTGSWSDQTYPEGTQAIYK GEWVALNPLR NTEILTGSWSDQTYPEGTQAIYK NTEILTGSWSDQTYPEGTQAIYK	GEWVALNPLR NTEILTGSWSDQTYPEGTQAIYK GEWVALNPLR NTEILTGSWSDQTYPEGTQAIYK GEWVALNPLR NTEILTGSWSDQTYPEGTQAIYK	20	18	8	10	4	6
CFH	Complement factor H	CFAH_HUMAN	Sushi 2	83	143	DOMAINS	60	1	0	0	0	0	0	0	1	0	0	RPCGHPGDTPFGTFTLTGGNVFEYGVK		2	0	0	0	0	0
CFH	Complement factor H	CFAH_HUMAN	Sushi 3	144	207	DOMAINS	63	4	0	9	0	0	0	0.0634921	1	4	0	IVSSAMEPDR IVSSAMEPDREYHFGQAVR IVSSAMEPDR		8	0	2	0	0	0
CFH	Complement factor H	CFAH_HUMAN	Sushi 4	208	264	DOMAINS	56	4	9	0	0	0	0	0.0714286	1	4	0	CNMGYEYSER SPDVINGSPISQK SPDVINGSPISQK		8	6	0	0	0	0
CFH	Complement factor H	CFAH_HUMAN	Sushi 5	265	322	DOMAINS	57	0	0	0	0	0	0	0	1	0	0			0	0	0	0	0	0
CFH	Complement factor H	CFAH_HUMAN	Sushi 6	324	386	DOMAINS	62	3	0	0	0	0	0	0.016129	1	1	0	HGGLYHENMR RPYFPVAVGK		6	0	0	0	0	0
CFH	Complement factor H	CFAH_HUMAN	Sushi 7	387	444	DOMAINS	57	10	9	9	0	0	0	0.157895	0.136	9	0	AQTTVTCMENGWSPTPR AQTTVTCMENGWSPTPR AQTTVTCMENGWSPTPR		20	6	2	0	0	0
CFH	Complement factor H	CFAH_HUMAN	Sushi 8	446	507	DOMAINS	61	3	0	0	0	0	0	0.0163934	1	1	0	SSIDIENGFISESQYTYALK		6	0	0	0	0	0
CFH	Complement factor H	CFAH_HUMAN	Sushi 9	515	566	DOMAINS	51	0	0	0	0	0	0	0	1	0	0			0	0	0	0	0	0
CFH	Complement factor H	CFAH_HUMAN	Sushi 10	567	625	DOMAINS	58	9	3	0	9	0	0	0.0172414	1	4	3	EQVQSCGPPPELLNGNVK IDVHLVPDR IDVHLVPDRK IDVHLVPDR	IDVHLVPDR	18	2	0	2	0	0
CFH	Complement factor H	CFAH_HUMAN	Sushi 11	628	686	DOMAINS	58	1	0	0	0	0	0	0	1	0	0	EQVQSCGPPPELLNGNVK		2	0	0	0	0	0
CFH	Complement factor H	CFAH_HUMAN	Sushi 12	689	746	DOMAINS	57	0	0	0	0	0	0	0	1	0	0			0	0	0	0	0	0
CFH	Complement factor H	CFAH_HUMAN	Sushi 13	751	805	DOMAINS	54	7	15	0	9	0	0	0.0740741	1	7	3	EGWIHTVCINGR KEFDHNSNIR SSNLIILEEHLK EGWIHTVCINGR SSNLIILEEHLK	SSNLIILEEHLK	14	10	0	2	0	0
CFH	Complement factor H	CFAH_HUMAN	Sushi 14	809	866	DOMAINS	57	0	0	0	0	0	0	0	1	0	0			0	0	0	0	0	0
CFH	Complement factor H	CFAH_HUMAN	Sushi 15	868	928	DOMAINS	60	0	0	0	0	0	0	0	1	0	0			0	0	0	0	0	0
CFH	Complement factor H	CFAH_HUMAN	Sushi 16	929	986	DOMAINS	57	8	3	0	0	0	0	0.0701754	1	4	0	CFEGFGIDGPAIAK SPPEISHGVVAHMSDSYQYGEEVTYK SPPEISHGVVAHMSDSYQYGEEVTYK		16	2	0	0	0	0
CFH	Complement factor H	CFAH_HUMAN	Sushi 17	987	1045	DOMAINS	58	0	0	0	0	0	0	0	1	0	0			0	0	0	0	0	0
CFH	Complement factor H	CFAH_HUMAN	Sushi 18	1046	1104	DOMAINS	58	0	0	0	0	0	0	0	1	0	0			0	0	0	0	0	0
CFH	Complement factor H	CFAH_HUMAN	Sushi 19	1107	1165	DOMAINS	58	0	0	0	0	0	0	0	1	0	0			0	0	0	0	0	0
CFH	Complement factor H	CFAH_HUMAN	Sushi 20	1170	1230	DOMAINS	60	10	6	18	9	0	18	0.0333333	1	11	9	EIMENYNIALR TGESVEFVCK EIMENYNIALR EIMENYNIALR	EIMENYNIALR EIMENYNIALR	20	4	4	2	0	2
CFH	Complement factor H	CFAH_HUMAN	50Step_Domain_p0_to_50	0	50	50.0 AA STEP	50	6	21	36	27	36	36	-0.24	0.0225	21	33	NTEILTGSWSDQTYPEGTQAIYK NTEILTGSWSDQTYPEGTQAIYK NTEILTGSWSDQTYPEGTQAIYK	NTEILTGSWSDQTYPEGTQAIYK NTEILTGSWSDQTYPEGTQAIYK NTEILTGSWSDQTYPEGTQAIYK	12	14	8	6	2	4
CFH	Complement factor H	CFAH_HUMAN	50Step_Domain_p50.0_to_100.0	50	100	50.0 AA STEP	50	11	27	36	44	71	53	-0.62	0	25	56	GEWVALNPLR NTEILTGSWSDQTYPEGTQAIYK RPCGHPGDTPFGTFTLTGGNVFEYGVK GEWVALNPLR NTEILTGSWSDQTYPEGTQAIYK NTEILTGSWSDQTYPEGTQAIYK	GEWVALNPLR NTEILTGSWSDQTYPEGTQAIYK GEWVALNPLR NTEILTGSWSDQTYPEGTQAIYK GEWVALNPLR NTEILTGSWSDQTYPEGTQAIYK	22	18	8	10	4	6
CFH	Complement factor H	CFAH_HUMAN	50Step_Domain_p100.0_to_150.0	100	150	50.0 AA STEP	50	1	0	0	0	0	0	0	1	0	0	RPCGHPGDTPFGTFTLTGGNVFEYGVK		2	0	0	0	0	0
CFH	Complement factor H	CFAH_HUMAN	50Step_Domain_p150.0_to_200.0	150	200	50.0 AA STEP	50	4	0	9	0	0	0	0.08	1	4	0	IVSSAMEPDR IVSSAMEPDREYHFGQAVR IVSSAMEPDR		8	0	2	0	0	0
CFH	Complement factor H	CFAH_HUMAN	50Step_Domain_p200.0_to_250.0	200	250	50.0 AA STEP	50	4	9	0	0	0	0	0.08	1	4	0	CNMGYEYSER SPDVINGSPISQK SPDVINGSPISQK		8	6	0	0	0	0
CFH	Complement factor H	CFAH_HUMAN	50Step_Domain_p250.0_to_300.0	250	300	50.0 AA STEP	50	0	0	0	0	0	0	0	1	0	0			0	0	0	0	0	0
CFH	Complement factor H	CFAH_HUMAN	50Step_Domain_p300.0_to_350.0	300	350	50.0 AA STEP	50	3	0	0	0	0	0	0.02	1	1	0	HGGLYHENMR RPYFPVAVGK		6	0	0	0	0	0
CFH	Complement factor H	CFAH_HUMAN	50Step_Domain_p350.0_to_400.0	350	400	50.0 AA STEP	50	2	0	0	0	0	0	0.02	1	1	0	RPYFPVAVGK		4	0	0	0	0	0
CFH	Complement factor H	CFAH_HUMAN	50Step_Domain_p400.0_to_450.0	400	450	50.0 AA STEP	50	10	9	9	0	0	0	0.18	0.225	9	0	AQTTVTCMENGWSPTPR AQTTVTCMENGWSPTPR AQTTVTCMENGWSPTPR		20	6	2	0	0	0
CFH	Complement factor H	CFAH_HUMAN	50Step_Domain_p450.0_to_500.0	450	500	50.0 AA STEP	50	3	0	0	0	0	0	0.02	1	1	0	SSIDIENGFISESQYTYALK		6	0	0	0	0	0
CFH	Complement factor H	CFAH_HUMAN	50Step_Domain_p500.0_to_550.0	500	550	50.0 AA STEP	50	0	0	0	0	0	0	0	1	0	0			0	0	0	0	0	0
CFH	Complement factor H	CFAH_HUMAN	50Step_Domain_p550.0_to_600.0	550	600	50.0 AA STEP	50	8	3	0	9	0	0	0.02	1	4	3	IDVHLVPDR IDVHLVPDRK IDVHLVPDR	IDVHLVPDR	16	2	0	2	0	0
CFH	Complement factor H	CFAH_HUMAN	50Step_Domain_p600.0_to_650.0	600	650	50.0 AA STEP	50	1	0	0	0	0	0	0	1	0	0	EQVQSCGPPPELLNGNVK		2	0	0	0	0	0
CFH	Complement factor H	CFAH_HUMAN	50Step_Domain_p650.0_to_700.0	650	700	50.0 AA STEP	50	0	0	0	0	0	0	0	1	0	0			0	0	0	0	0	0
CFH	Complement factor H	CFAH_HUMAN	50Step_Domain_p700.0_to_750.0	700	750	50.0 AA STEP	50	0	0	0	0	0	0	0	1	0	0			0	0	0	0	0	0
CFH	Complement factor H	CFAH_HUMAN	50Step_Domain_p750.0_to_800.0	750	800	50.0 AA STEP	50	7	15	0	9	0	0	0.08	1	7	3	EGWIHTVCINGR KEFDHNSNIR SSNLIILEEHLK EGWIHTVCINGR SSNLIILEEHLK	SSNLIILEEHLK	14	10	0	2	0	0
CFH	Complement factor H	CFAH_HUMAN	50Step_Domain_p800.0_to_850.0	800	850	50.0 AA STEP	50	0	0	0	0	0	0	0	1	0	0			0	0	0	0	0	0
CFH	Complement factor H	CFAH_HUMAN	50Step_Domain_p850.0_to_900.0	850	900	50.0 AA STEP	50	0	0	0	0	0	0	0	1	0	0			0	0	0	0	0	0
CFH	Complement factor H	CFAH_HUMAN	50Step_Domain_p900.0_to_950.0	900	950	50.0 AA STEP	50	6	3	0	0	0	0	0.06	1	3	0	SPPEISHGVVAHMSDSYQYGEEVTYK SPPEISHGVVAHMSDSYQYGEEVTYK		12	2	0	0	0	0
CFH	Complement factor H	CFAH_HUMAN	50Step_Domain_p950.0_to_1000.0	950	1000	50.0 AA STEP	50	8	3	0	0	0	0	0.08	1	4	0	CFEGFGIDGPAIAK SPPEISHGVVAHMSDSYQYGEEVTYK SPPEISHGVVAHMSDSYQYGEEVTYK		16	2	0	0	0	0
CFH	Complement factor H	CFAH_HUMAN	50Step_Domain_p1000.0_to_1050.0	1000	1050	50.0 AA STEP	50	0	0	0	0	0	0	0	1	0	0			0	0	0	0	0	0
CFH	Complement factor H	CFAH_HUMAN	50Step_Domain_p1050.0_to_1100.0	1050	1100	50.0 AA STEP	50	0	0	0	0	0	0	0	1	0	0			0	0	0	0	0	0
CFH	Complement factor H	CFAH_HUMAN	50Step_Domain_p1100.0_to_1150.0	1100	1150	50.0 AA STEP	50	0	0	0	0	0	0	0	1	0	0			0	0	0	0	0	0
CFH	Complement factor H	CFAH_HUMAN	50Step_Domain_p1150.0_to_1200.0	1150	1200	50.0 AA STEP	50	10	6	18	9	0	18	0.04	1	11	9	EIMENYNIALR TGESVEFVCK EIMENYNIALR EIMENYNIALR	EIMENYNIALR EIMENYNIALR	20	4	4	2	0	2
CFH	Complement factor H	CFAH_HUMAN	50Step_Domain_p1200.0_to_1231.0	1200	1231	50.0 AA STEP	31	1	0	0	0	0	0	0	1	0	0	TGESVEFVCK		2	0	0	0	0	0
CFH	Complement factor H	CFAH_HUMAN	80Step_Domain_p0_to_80	0	80	80.0 AA STEP	80	10	27	36	44	71	53	-0.4	0	24	56	GEWVALNPLR NTEILTGSWSDQTYPEGTQAIYK GEWVALNPLR NTEILTGSWSDQTYPEGTQAIYK NTEILTGSWSDQTYPEGTQAIYK	GEWVALNPLR NTEILTGSWSDQTYPEGTQAIYK GEWVALNPLR NTEILTGSWSDQTYPEGTQAIYK GEWVALNPLR NTEILTGSWSDQTYPEGTQAIYK	20	18	8	10	4	6
CFH	Complement factor H	CFAH_HUMAN	80Step_Domain_p80.0_to_160.0	80	160	80.0 AA STEP	80	5	0	9	0	0	0	0.0625	1	5	0	IVSSAMEPDR IVSSAMEPDREYHFGQAVR RPCGHPGDTPFGTFTLTGGNVFEYGVK IVSSAMEPDR		10	0	2	0	0	0
CFH	Complement factor H	CFAH_HUMAN	80Step_Domain_p160.0_to_240.0	160	240	80.0 AA STEP	80	8	9	9	0	0	0	0.1125	0.3616	9	0	CNMGYEYSER IVSSAMEPDR IVSSAMEPDREYHFGQAVR SPDVINGSPISQK SPDVINGSPISQK IVSSAMEPDR		16	6	2	0	0	0
CFH	Complement factor H	CFAH_HUMAN	80Step_Domain_p240.0_to_320.0	240	320	80.0 AA STEP	80	1	0	0	0	0	0	0	1	0	0	CNMGYEYSER		2	0	0	0	0	0
CFH	Complement factor H	CFAH_HUMAN	80Step_Domain_p320.0_to_400.0	320	400	80.0 AA STEP	80	3	0	0	0	0	0	0.0125	1	1	0	HGGLYHENMR RPYFPVAVGK		6	0	0	0	0	0
CFH	Complement factor H	CFAH_HUMAN	80Step_Domain_p400.0_to_480.0	400	480	80.0 AA STEP	80	13	9	9	0	0	0	0.125	0.112	10	0	AQTTVTCMENGWSPTPR SSIDIENGFISESQYTYALK AQTTVTCMENGWSPTPR AQTTVTCMENGWSPTPR		26	6	2	0	0	0
CFH	Complement factor H	CFAH_HUMAN	80Step_Domain_p480.0_to_560.0	480	560	80.0 AA STEP	80	0	0	0	0	0	0	0	1	0	0			0	0	0	0	0	0
CFH	Complement factor H	CFAH_HUMAN	80Step_Domain_p560.0_to_640.0	560	640	80.0 AA STEP	80	9	3	0	9	0	0	0.0125	1	4	3	EQVQSCGPPPELLNGNVK IDVHLVPDR IDVHLVPDRK IDVHLVPDR	IDVHLVPDR	18	2	0	2	0	0
CFH	Complement factor H	CFAH_HUMAN	80Step_Domain_p640.0_to_720.0	640	720	80.0 AA STEP	80	1	0	0	0	0	0	0	1	0	0	EQVQSCGPPPELLNGNVK		2	0	0	0	0	0
CFH	Complement factor H	CFAH_HUMAN	80Step_Domain_p720.0_to_800.0	720	800	80.0 AA STEP	80	7	15	0	9	0	0	0.05	1	7	3	EGWIHTVCINGR KEFDHNSNIR SSNLIILEEHLK EGWIHTVCINGR SSNLIILEEHLK	SSNLIILEEHLK	14	10	0	2	0	0
CFH	Complement factor H	CFAH_HUMAN	80Step_Domain_p800.0_to_880.0	800	880	80.0 AA STEP	80	0	0	0	0	0	0	0	1	0	0			0	0	0	0	0	0
CFH	Complement factor H	CFAH_HUMAN	80Step_Domain_p880.0_to_960.0	880	960	80.0 AA STEP	80	8	3	0	0	0	0	0.05	1	4	0	CFEGFGIDGPAIAK SPPEISHGVVAHMSDSYQYGEEVTYK SPPEISHGVVAHMSDSYQYGEEVTYK		16	2	0	0	0	0
CFH	Complement factor H	CFAH_HUMAN	80Step_Domain_p960.0_to_1040.0	960	1040	80.0 AA STEP	80	2	0	0	0	0	0	0.0125	1	1	0	CFEGFGIDGPAIAK		4	0	0	0	0	0
CFH	Complement factor H	CFAH_HUMAN	80Step_Domain_p1040.0_to_1120.0	1040	1120	80.0 AA STEP	80	0	0	0	0	0	0	0	1	0	0			0	0	0	0	0	0
CFH	Complement factor H	CFAH_HUMAN	80Step_Domain_p1120.0_to_1200.0	1120	1200	80.0 AA STEP	80	10	6	18	9	0	18	0.025	1	11	9	EIMENYNIALR TGESVEFVCK EIMENYNIALR EIMENYNIALR	EIMENYNIALR EIMENYNIALR	20	4	4	2	0	2
CFH	Complement factor H	CFAH_HUMAN	80Step_Domain_p1200.0_to_1231.0	1200	1231	80.0 AA STEP	31	1	0	0	0	0	0	0	1	0	0	TGESVEFVCK		2	0	0	0	0	0
CFH	Complement factor H	CFAH_HUMAN	100Step_Domain_p0_to_100	0	100	100.0 AA STEP	100	11	27	36	44	71	53	-0.31	0	25	56	GEWVALNPLR NTEILTGSWSDQTYPEGTQAIYK RPCGHPGDTPFGTFTLTGGNVFEYGVK GEWVALNPLR NTEILTGSWSDQTYPEGTQAIYK NTEILTGSWSDQTYPEGTQAIYK	GEWVALNPLR NTEILTGSWSDQTYPEGTQAIYK GEWVALNPLR NTEILTGSWSDQTYPEGTQAIYK GEWVALNPLR NTEILTGSWSDQTYPEGTQAIYK	22	18	8	10	4	6
CFH	Complement factor H	CFAH_HUMAN	100Step_Domain_p100.0_to_200.0	100	200	100.0 AA STEP	100	5	0	9	0	0	0	0.05	1	5	0	IVSSAMEPDR IVSSAMEPDREYHFGQAVR RPCGHPGDTPFGTFTLTGGNVFEYGVK IVSSAMEPDR		10	0	2	0	0	0
CFH	Complement factor H	CFAH_HUMAN	100Step_Domain_p200.0_to_300.0	200	300	100.0 AA STEP	100	4	9	0	0	0	0	0.04	1	4	0	CNMGYEYSER SPDVINGSPISQK SPDVINGSPISQK		8	6	0	0	0	0
CFH	Complement factor H	CFAH_HUMAN	100Step_Domain_p300.0_to_400.0	300	400	100.0 AA STEP	100	3	0	0	0	0	0	0.01	1	1	0	HGGLYHENMR RPYFPVAVGK		6	0	0	0	0	0
CFH	Complement factor H	CFAH_HUMAN	100Step_Domain_p400.0_to_500.0	400	500	100.0 AA STEP	100	13	9	9	0	0	0	0.1	0.1976	10	0	AQTTVTCMENGWSPTPR SSIDIENGFISESQYTYALK AQTTVTCMENGWSPTPR AQTTVTCMENGWSPTPR		26	6	2	0	0	0
CFH	Complement factor H	CFAH_HUMAN	100Step_Domain_p500.0_to_600.0	500	600	100.0 AA STEP	100	8	3	0	9	0	0	0.01	1	4	3	IDVHLVPDR IDVHLVPDRK IDVHLVPDR	IDVHLVPDR	16	2	0	2	0	0
CFH	Complement factor H	CFAH_HUMAN	100Step_Domain_p600.0_to_700.0	600	700	100.0 AA STEP	100	1	0	0	0	0	0	0	1	0	0	EQVQSCGPPPELLNGNVK		2	0	0	0	0	0
CFH	Complement factor H	CFAH_HUMAN	100Step_Domain_p700.0_to_800.0	700	800	100.0 AA STEP	100	7	15	0	9	0	0	0.04	1	7	3	EGWIHTVCINGR KEFDHNSNIR SSNLIILEEHLK EGWIHTVCINGR SSNLIILEEHLK	SSNLIILEEHLK	14	10	0	2	0	0
CFH	Complement factor H	CFAH_HUMAN	100Step_Domain_p800.0_to_900.0	800	900	100.0 AA STEP	100	0	0	0	0	0	0	0	1	0	0			0	0	0	0	0	0
CFH	Complement factor H	CFAH_HUMAN	100Step_Domain_p900.0_to_1000.0	900	1000	100.0 AA STEP	100	8	3	0	0	0	0	0.04	1	4	0	CFEGFGIDGPAIAK SPPEISHGVVAHMSDSYQYGEEVTYK SPPEISHGVVAHMSDSYQYGEEVTYK		16	2	0	0	0	0
CFH	Complement factor H	CFAH_HUMAN	100Step_Domain_p1000.0_to_1100.0	1000	1100	100.0 AA STEP	100	0	0	0	0	0	0	0	1	0	0			0	0	0	0	0	0
CFH	Complement factor H	CFAH_HUMAN	100Step_Domain_p1100.0_to_1200.0	1100	1200	100.0 AA STEP	100	10	6	18	9	0	18	0.02	1	11	9	EIMENYNIALR TGESVEFVCK EIMENYNIALR EIMENYNIALR	EIMENYNIALR EIMENYNIALR	20	4	4	2	0	2
CFH	Complement factor H	CFAH_HUMAN	100Step_Domain_p1200.0_to_1231.0	1200	1231	100.0 AA STEP	31	1	0	0	0	0	0	0	1	0	0	TGESVEFVCK		2	0	0	0	0	0
HIST1H1E	Histone 1; H1e	A3R0T8_HUMAN	Disordered	1	41	REGIONS	40	4	3	8	8	8	8	-0.075	0.0688	5	8	ASGPPVSELITK ASGPPVSELITK ASGPPVSELITK	ASGPPVSELITK ASGPPVSELITK ASGPPVSELITK	4	2	10	8	10	6
HIST1H1E	Histone 1; H1e	A3R0T8_HUMAN	Disordered_92_219	92	219	REGIONS	127	0	0	0	0	2	0	-0.00787402	1	0	1		GTGASGSFK	0	0	0	0	2	0
HIST1H1E	Histone 1; H1e	A3R0T8_HUMAN	50Step_Domain_p0_to_50	0	50	50.0 AA STEP	50	4	3	8	8	8	8	-0.06	0.038	5	8	ASGPPVSELITK ASGPPVSELITK ASGPPVSELITK	ASGPPVSELITK ASGPPVSELITK ASGPPVSELITK	4	2	10	8	10	6
HIST1H1E	Histone 1; H1e	A3R0T8_HUMAN	50Step_Domain_p50.0_to_100.0	50	100	50.0 AA STEP	50	11	12	7	8	8	8	0.04	0.3095	10	8	ALAAAGYDVEK SGVSLAALK ALAAAGYDVEK SGVSLAALK ALAAAGYDVEK SGVSLAALK	ALAAAGYDVEK SGVSLAALK ALAAAGYDVEK GTGASGSFK SGVSLAALK ALAAAGYDVEK SGVSLAALK	12	8	8	8	10	6
HIST1H1E	Histone 1; H1e	A3R0T8_HUMAN	50Step_Domain_p100.0_to_150.0	100	150	50.0 AA STEP	50	0	0	0	0	2	0	-0.02	1	0	1		GTGASGSFK	0	0	0	0	2	0
HIST1H1E	Histone 1; H1e	A3R0T8_HUMAN	50Step_Domain_p150.0_to_200.0	150	200	50.0 AA STEP	50	0	0	0	0	0	0	0	1	0	0			0	0	0	0	0	0
HIST1H1E	Histone 1; H1e	A3R0T8_HUMAN	50Step_Domain_p200.0_to_219.0	200	219	50.0 AA STEP	19	0	0	0	0	0	0	0	1	0	0			0	0	0	0	0	0
HIST1H1E	Histone 1; H1e	A3R0T8_HUMAN	80Step_Domain_p0_to_80	0	80	80.0 AA STEP	80	15	15	15	15	14	15	0	1	15	15	ALAAAGYDVEK ASGPPVSELITK SGVSLAALK ALAAAGYDVEK ASGPPVSELITK SGVSLAALK ALAAAGYDVEK ASGPPVSELITK SGVSLAALK	ALAAAGYDVEK ASGPPVSELITK SGVSLAALK ALAAAGYDVEK ASGPPVSELITK SGVSLAALK ALAAAGYDVEK ASGPPVSELITK SGVSLAALK	16	10	18	16	18	12
HIST1H1E	Histone 1; H1e	A3R0T8_HUMAN	80Step_Domain_p80.0_to_160.0	80	160	80.0 AA STEP	80	0	0	0	0	2	0	-0.0125	0.4419	0	1		GTGASGSFK	0	0	0	0	2	0
HIST1H1E	Histone 1; H1e	A3R0T8_HUMAN	80Step_Domain_p160.0_to_219.0	160	219	80.0 AA STEP	59	0	0	0	0	0	0	0	1	0	0			0	0	0	0	0	0
HIST1H1E	Histone 1; H1e	A3R0T8_HUMAN	100Step_Domain_p0_to_100	0	100	100.0 AA STEP	100	15	15	15	15	15	15	0	1	15	15	ALAAAGYDVEK ASGPPVSELITK SGVSLAALK ALAAAGYDVEK ASGPPVSELITK SGVSLAALK ALAAAGYDVEK ASGPPVSELITK SGVSLAALK	ALAAAGYDVEK ASGPPVSELITK SGVSLAALK ALAAAGYDVEK ASGPPVSELITK GTGASGSFK SGVSLAALK ALAAAGYDVEK ASGPPVSELITK SGVSLAALK	16	10	18	16	20	12
HIST1H1E	Histone 1; H1e	A3R0T8_HUMAN	100Step_Domain_p100.0_to_200.0	100	200	100.0 AA STEP	100	0	0	0	0	2	0	-0.01	0.3267	0	1		GTGASGSFK	0	0	0	0	2	0
HIST1H1E	Histone 1; H1e	A3R0T8_HUMAN	100Step_Domain_p200.0_to_219.0	200	219	100.0 AA STEP	19	0	0	0	0	0	0	0	1	0	0			0	0	0	0	0	0
N/A	cDNA; FLJ94268; highly similar to Homo sapiens histone 1; H1e (HIST1H1E); mRNA	B2R984_HUMAN	Disordered	1	41	REGIONS	40	4	3	8	8	8	8	-0.075	0.0688	5	8	ASGPPVSELITK ASGPPVSELITK ASGPPVSELITK	ASGPPVSELITK ASGPPVSELITK ASGPPVSELITK	4	2	10	8	10	6
N/A	cDNA; FLJ94268; highly similar to Homo sapiens histone 1; H1e (HIST1H1E); mRNA	B2R984_HUMAN	Disordered_92_219	92	219	REGIONS	127	0	0	0	0	2	0	-0.00787402	1	0	1		GTGASGSFK	0	0	0	0	2	0
N/A	cDNA; FLJ94268; highly similar to Homo sapiens histone 1; H1e (HIST1H1E); mRNA	B2R984_HUMAN	50Step_Domain_p0_to_50	0	50	50.0 AA STEP	50	4	3	8	8	8	8	-0.06	0.038	5	8	ASGPPVSELITK ASGPPVSELITK ASGPPVSELITK	ASGPPVSELITK ASGPPVSELITK ASGPPVSELITK	4	2	10	8	10	6
N/A	cDNA; FLJ94268; highly similar to Homo sapiens histone 1; H1e (HIST1H1E); mRNA	B2R984_HUMAN	50Step_Domain_p50.0_to_100.0	50	100	50.0 AA STEP	50	11	12	7	8	8	8	0.04	0.3095	10	8	ALAAAGYDVEK SGVSLAALK ALAAAGYDVEK SGVSLAALK ALAAAGYDVEK SGVSLAALK	ALAAAGYDVEK SGVSLAALK ALAAAGYDVEK GTGASGSFK SGVSLAALK ALAAAGYDVEK SGVSLAALK	12	8	8	8	10	6
N/A	cDNA; FLJ94268; highly similar to Homo sapiens histone 1; H1e (HIST1H1E); mRNA	B2R984_HUMAN	50Step_Domain_p100.0_to_150.0	100	150	50.0 AA STEP	50	0	0	0	0	2	0	-0.02	1	0	1		GTGASGSFK	0	0	0	0	2	0
N/A	cDNA; FLJ94268; highly similar to Homo sapiens histone 1; H1e (HIST1H1E); mRNA	B2R984_HUMAN	50Step_Domain_p150.0_to_200.0	150	200	50.0 AA STEP	50	0	0	0	0	0	0	0	1	0	0			0	0	0	0	0	0
N/A	cDNA; FLJ94268; highly similar to Homo sapiens histone 1; H1e (HIST1H1E); mRNA	B2R984_HUMAN	50Step_Domain_p200.0_to_219.0	200	219	50.0 AA STEP	19	0	0	0	0	0	0	0	1	0	0			0	0	0	0	0	0
N/A	cDNA; FLJ94268; highly similar to Homo sapiens histone 1; H1e (HIST1H1E); mRNA	B2R984_HUMAN	80Step_Domain_p0_to_80	0	80	80.0 AA STEP	80	15	15	15	15	14	15	0	1	15	15	ALAAAGYDVEK ASGPPVSELITK SGVSLAALK ALAAAGYDVEK ASGPPVSELITK SGVSLAALK ALAAAGYDVEK ASGPPVSELITK SGVSLAALK	ALAAAGYDVEK ASGPPVSELITK SGVSLAALK ALAAAGYDVEK ASGPPVSELITK SGVSLAALK ALAAAGYDVEK ASGPPVSELITK SGVSLAALK	16	10	18	16	18	12
N/A	cDNA; FLJ94268; highly similar to Homo sapiens histone 1; H1e (HIST1H1E); mRNA	B2R984_HUMAN	80Step_Domain_p80.0_to_160.0	80	160	80.0 AA STEP	80	0	0	0	0	2	0	-0.0125	0.4419	0	1		GTGASGSFK	0	0	0	0	2	0
N/A	cDNA; FLJ94268; highly similar to Homo sapiens histone 1; H1e (HIST1H1E); mRNA	B2R984_HUMAN	80Step_Domain_p160.0_to_219.0	160	219	80.0 AA STEP	59	0	0	0	0	0	0	0	1	0	0			0	0	0	0	0	0
N/A	cDNA; FLJ94268; highly similar to Homo sapiens histone 1; H1e (HIST1H1E); mRNA	B2R984_HUMAN	100Step_Domain_p0_to_100	0	100	100.0 AA STEP	100	15	15	15	15	15	15	0	1	15	15	ALAAAGYDVEK ASGPPVSELITK SGVSLAALK ALAAAGYDVEK ASGPPVSELITK SGVSLAALK ALAAAGYDVEK ASGPPVSELITK SGVSLAALK	ALAAAGYDVEK ASGPPVSELITK SGVSLAALK ALAAAGYDVEK ASGPPVSELITK GTGASGSFK SGVSLAALK ALAAAGYDVEK ASGPPVSELITK SGVSLAALK	16	10	18	16	20	12
N/A	cDNA; FLJ94268; highly similar to Homo sapiens histone 1; H1e (HIST1H1E); mRNA	B2R984_HUMAN	100Step_Domain_p100.0_to_200.0	100	200	100.0 AA STEP	100	0	0	0	0	2	0	-0.01	0.3267	0	1		GTGASGSFK	0	0	0	0	2	0
N/A	cDNA; FLJ94268; highly similar to Homo sapiens histone 1; H1e (HIST1H1E); mRNA	B2R984_HUMAN	100Step_Domain_p200.0_to_219.0	200	219	100.0 AA STEP	19	0	0	0	0	0	0	0	1	0	0			0	0	0	0	0	0
H1-4	Histone H1.4	H14_HUMAN	50Step_Domain_p0_to_50	0	50	50.0 AA STEP	50	4	3	8	8	8	8	-0.06	0.038	5	8	ASGPPVSELITK ASGPPVSELITK ASGPPVSELITK	ASGPPVSELITK ASGPPVSELITK ASGPPVSELITK	4	2	10	8	10	6
H1-4	Histone H1.4	H14_HUMAN	50Step_Domain_p50.0_to_100.0	50	100	50.0 AA STEP	50	11	12	7	8	8	8	0.04	0.3095	10	8	ALAAAGYDVEK SGVSLAALK ALAAAGYDVEK SGVSLAALK ALAAAGYDVEK SGVSLAALK	ALAAAGYDVEK SGVSLAALK ALAAAGYDVEK GTGASGSFK SGVSLAALK ALAAAGYDVEK SGVSLAALK	12	8	8	8	10	6
H1-4	Histone H1.4	H14_HUMAN	50Step_Domain_p100.0_to_150.0	100	150	50.0 AA STEP	50	0	0	0	0	2	0	-0.02	1	0	1		GTGASGSFK	0	0	0	0	2	0
H1-4	Histone H1.4	H14_HUMAN	50Step_Domain_p150.0_to_200.0	150	200	50.0 AA STEP	50	0	0	0	0	0	0	0	1	0	0			0	0	0	0	0	0
H1-4	Histone H1.4	H14_HUMAN	50Step_Domain_p200.0_to_219.0	200	219	50.0 AA STEP	19	0	0	0	0	0	0	0	1	0	0			0	0	0	0	0	0
H1-4	Histone H1.4	H14_HUMAN	80Step_Domain_p0_to_80	0	80	80.0 AA STEP	80	15	15	15	15	14	15	0	1	15	15	ALAAAGYDVEK ASGPPVSELITK SGVSLAALK ALAAAGYDVEK ASGPPVSELITK SGVSLAALK ALAAAGYDVEK ASGPPVSELITK SGVSLAALK	ALAAAGYDVEK ASGPPVSELITK SGVSLAALK ALAAAGYDVEK ASGPPVSELITK SGVSLAALK ALAAAGYDVEK ASGPPVSELITK SGVSLAALK	16	10	18	16	18	12
H1-4	Histone H1.4	H14_HUMAN	80Step_Domain_p80.0_to_160.0	80	160	80.0 AA STEP	80	0	0	0	0	2	0	-0.0125	0.4419	0	1		GTGASGSFK	0	0	0	0	2	0
H1-4	Histone H1.4	H14_HUMAN	80Step_Domain_p160.0_to_219.0	160	219	80.0 AA STEP	59	0	0	0	0	0	0	0	1	0	0			0	0	0	0	0	0
H1-4	Histone H1.4	H14_HUMAN	100Step_Domain_p0_to_100	0	100	100.0 AA STEP	100	15	15	15	15	15	15	0	1	15	15	ALAAAGYDVEK ASGPPVSELITK SGVSLAALK ALAAAGYDVEK ASGPPVSELITK SGVSLAALK ALAAAGYDVEK ASGPPVSELITK SGVSLAALK	ALAAAGYDVEK ASGPPVSELITK SGVSLAALK ALAAAGYDVEK ASGPPVSELITK GTGASGSFK SGVSLAALK ALAAAGYDVEK ASGPPVSELITK SGVSLAALK	16	10	18	16	20	12
H1-4	Histone H1.4	H14_HUMAN	100Step_Domain_p100.0_to_200.0	100	200	100.0 AA STEP	100	0	0	0	0	2	0	-0.01	0.3267	0	1		GTGASGSFK	0	0	0	0	2	0
H1-4	Histone H1.4	H14_HUMAN	100Step_Domain_p200.0_to_219.0	200	219	100.0 AA STEP	19	0	0	0	0	0	0	0	1	0	0			0	0	0	0	0	0
H1-2	Histone H1.2	H12_HUMAN	50Step_Domain_p0_to_50	0	50	50.0 AA STEP	50	4	3	8	8	8	8	-0.06	0.038	5	8	ASGPPVSELITK ASGPPVSELITK ASGPPVSELITK	ASGPPVSELITK ASGPPVSELITK ASGPPVSELITK	4	2	10	8	10	6
H1-2	Histone H1.2	H12_HUMAN	50Step_Domain_p50.0_to_100.0	50	100	50.0 AA STEP	50	11	12	7	8	8	8	0.04	0.3095	10	8	ALAAAGYDVEK SGVSLAALK ALAAAGYDVEK SGVSLAALK ALAAAGYDVEK SGVSLAALK	ALAAAGYDVEK SGVSLAALK ALAAAGYDVEK GTGASGSFK SGVSLAALK ALAAAGYDVEK SGVSLAALK	12	8	8	8	10	6
H1-2	Histone H1.2	H12_HUMAN	50Step_Domain_p100.0_to_150.0	100	150	50.0 AA STEP	50	0	0	0	0	2	0	-0.02	1	0	1		GTGASGSFK	0	0	0	0	2	0
H1-2	Histone H1.2	H12_HUMAN	50Step_Domain_p150.0_to_200.0	150	200	50.0 AA STEP	50	0	0	0	0	0	0	0	1	0	0			0	0	0	0	0	0
H1-2	Histone H1.2	H12_HUMAN	50Step_Domain_p200.0_to_213.0	200	213	50.0 AA STEP	13	0	0	0	0	0	0	0	1	0	0			0	0	0	0	0	0
H1-2	Histone H1.2	H12_HUMAN	80Step_Domain_p0_to_80	0	80	80.0 AA STEP	80	15	15	15	15	14	15	0	1	15	15	ALAAAGYDVEK ASGPPVSELITK SGVSLAALK ALAAAGYDVEK ASGPPVSELITK SGVSLAALK ALAAAGYDVEK ASGPPVSELITK SGVSLAALK	ALAAAGYDVEK ASGPPVSELITK SGVSLAALK ALAAAGYDVEK ASGPPVSELITK SGVSLAALK ALAAAGYDVEK ASGPPVSELITK SGVSLAALK	16	10	18	16	18	12
H1-2	Histone H1.2	H12_HUMAN	80Step_Domain_p80.0_to_160.0	80	160	80.0 AA STEP	80	0	0	0	0	2	0	-0.0125	0.4419	0	1		GTGASGSFK	0	0	0	0	2	0
H1-2	Histone H1.2	H12_HUMAN	80Step_Domain_p160.0_to_213.0	160	213	80.0 AA STEP	53	0	0	0	0	0	0	0	1	0	0			0	0	0	0	0	0
H1-2	Histone H1.2	H12_HUMAN	100Step_Domain_p0_to_100	0	100	100.0 AA STEP	100	15	15	15	15	15	15	0	1	15	15	ALAAAGYDVEK ASGPPVSELITK SGVSLAALK ALAAAGYDVEK ASGPPVSELITK SGVSLAALK ALAAAGYDVEK ASGPPVSELITK SGVSLAALK	ALAAAGYDVEK ASGPPVSELITK SGVSLAALK ALAAAGYDVEK ASGPPVSELITK GTGASGSFK SGVSLAALK ALAAAGYDVEK ASGPPVSELITK SGVSLAALK	16	10	18	16	20	12
H1-2	Histone H1.2	H12_HUMAN	100Step_Domain_p100.0_to_200.0	100	200	100.0 AA STEP	100	0	0	0	0	2	0	-0.01	0.3267	0	1		GTGASGSFK	0	0	0	0	2	0
H1-2	Histone H1.2	H12_HUMAN	100Step_Domain_p200.0_to_213.0	200	213	100.0 AA STEP	13	0	0	0	0	0	0	0	1	0	0			0	0	0	0	0	0
COL5A1	Collagen alpha-1(V) chain	CO5A1_HUMAN	Nonhelical region	231	443	REGIONS	212	0	0	0	0	0	0	0	1	0	0			0	0	0	0	0	0
COL5A1	Collagen alpha-1(V) chain	CO5A1_HUMAN	Interrupted collagenous region	444	558	REGIONS	114	0	0	0	0	0	0	0	1	0	0			0	0	0	0	0	0
COL5A1	Collagen alpha-1(V) chain	CO5A1_HUMAN	Triple-helical region	559	1570	REGIONS	1011	0	0	0	0	0	0	0	1	0	0			0	0	0	0	0	0
COL5A1	Collagen alpha-1(V) chain	CO5A1_HUMAN	Nonhelical region_1571_1605	1571	1605	REGIONS	34	0	0	0	0	0	0	0	1	0	0			0	0	0	0	0	0
COL5A1	Collagen alpha-1(V) chain	CO5A1_HUMAN	Laminin G-like	72	244	DOMAINS	172	3	2	0	2	4	0	0	1	2	2	QLYPASAFPEDFSILTTVK ILDEEVFEGDIQQLLFVSDHR	ILDEEVFEGDIQQLLFVSDHR QLYPASAFPEDFSILTTVK ILDEEVFEGDIQQLLFVSDHR SPVFLYEDHTGKPGPEDYPLFR	2	2	0	4	4	0
COL5A1	Collagen alpha-1(V) chain	CO5A1_HUMAN	Fibrillar collagen NC1	1609	1837	DOMAINS	228	25	23	19	26	24	28	-0.0175439	0.1548	22	26	ENPGSWFSEFK FLGSNDEEMSYDNNPYIR TVLEIDTPK VEQVPIVDIMFNDFGEASQK ENPGSWFSEFK FLGSNDEEMSYDNNPYIR LLSYVDAEGNPVGVVQMTFLR TVLEIDTPK VEQVPIVDIMFNDFGEASQK FLGSNDEEMSYDNNPYIR TVLEIDTPK	ENPGSWFSEFK FLGSNDEEMSYDNNPYIR LLSYVDAEGNPVGVVQMTFLR TVLEIDTPK VEQVPIVDIMFNDFGEASQK ENPGSWFSEFK FLGSNDEEMSYDNNPYIR LLSYVDAEGNPVGVVQMTFLR TVLEIDTPK VEQVPIVDIMFNDFGEASQK ENPGSWFSEFK FLGSNDEEMSYDNNPYIR TVLEIDTPK	16	20	4	46	24	16
COL5A1	Collagen alpha-1(V) chain	CO5A1_HUMAN	50Step_Domain_p0_to_50	0	50	50.0 AA STEP	50	0	2	9	0	0	0	0.08	0.0888	4	0	VLDFHNLPDGITK VLDFHNLPDGITK		0	2	2	0	0	0
COL5A1	Collagen alpha-1(V) chain	CO5A1_HUMAN	50Step_Domain_p50.0_to_100.0	50	100	50.0 AA STEP	50	3	2	9	1	0	0	0.1	0.0148	5	0	QLYPASAFPEDFSILTTVK VLDFHNLPDGITK VLDFHNLPDGITK	QLYPASAFPEDFSILTTVK	2	2	2	2	0	0
COL5A1	Collagen alpha-1(V) chain	CO5A1_HUMAN	50Step_Domain_p100.0_to_150.0	100	150	50.0 AA STEP	50	3	0	0	1	2	0	0	1	1	1	QLYPASAFPEDFSILTTVK	QLYPASAFPEDFSILTTVK SPVFLYEDHTGKPGPEDYPLFR	2	0	0	2	2	0
COL5A1	Collagen alpha-1(V) chain	CO5A1_HUMAN	50Step_Domain_p150.0_to_200.0	150	200	50.0 AA STEP	50	0	0	0	0	2	0	-0.02	1	0	1		SPVFLYEDHTGKPGPEDYPLFR	0	0	0	0	2	0
COL5A1	Collagen alpha-1(V) chain	CO5A1_HUMAN	50Step_Domain_p200.0_to_250.0	200	250	50.0 AA STEP	50	0	2	0	1	2	0	0	1	1	1	ILDEEVFEGDIQQLLFVSDHR	ILDEEVFEGDIQQLLFVSDHR ILDEEVFEGDIQQLLFVSDHR	0	2	0	2	2	0
COL5A1	Collagen alpha-1(V) chain	CO5A1_HUMAN	50Step_Domain_p250.0_to_300.0	250	300	50.0 AA STEP	50	0	0	0	0	0	0	0	1	0	0			0	0	0	0	0	0
COL5A1	Collagen alpha-1(V) chain	CO5A1_HUMAN	50Step_Domain_p300.0_to_350.0	300	350	50.0 AA STEP	50	0	0	0	0	0	0	0	1	0	0			0	0	0	0	0	0
COL5A1	Collagen alpha-1(V) chain	CO5A1_HUMAN	50Step_Domain_p350.0_to_400.0	350	400	50.0 AA STEP	50	0	0	0	0	0	0	0	1	0	0			0	0	0	0	0	0
COL5A1	Collagen alpha-1(V) chain	CO5A1_HUMAN	50Step_Domain_p400.0_to_450.0	400	450	50.0 AA STEP	50	0	0	0	0	0	0	0	1	0	0			0	0	0	0	0	0
COL5A1	Collagen alpha-1(V) chain	CO5A1_HUMAN	50Step_Domain_p450.0_to_500.0	450	500	50.0 AA STEP	50	0	0	0	0	0	0	0	1	0	0			0	0	0	0	0	0
COL5A1	Collagen alpha-1(V) chain	CO5A1_HUMAN	50Step_Domain_p500.0_to_550.0	500	550	50.0 AA STEP	50	0	0	0	0	0	0	0	1	0	0			0	0	0	0	0	0
COL5A1	Collagen alpha-1(V) chain	CO5A1_HUMAN	50Step_Domain_p550.0_to_600.0	550	600	50.0 AA STEP	50	0	0	0	0	0	0	0	1	0	0			0	0	0	0	0	0
COL5A1	Collagen alpha-1(V) chain	CO5A1_HUMAN	50Step_Domain_p600.0_to_650.0	600	650	50.0 AA STEP	50	0	0	0	0	0	0	0	1	0	0			0	0	0	0	0	0
COL5A1	Collagen alpha-1(V) chain	CO5A1_HUMAN	50Step_Domain_p650.0_to_700.0	650	700	50.0 AA STEP	50	0	0	0	0	0	0	0	1	0	0			0	0	0	0	0	0
COL5A1	Collagen alpha-1(V) chain	CO5A1_HUMAN	50Step_Domain_p700.0_to_750.0	700	750	50.0 AA STEP	50	0	0	0	0	0	0	0	1	0	0			0	0	0	0	0	0
COL5A1	Collagen alpha-1(V) chain	CO5A1_HUMAN	50Step_Domain_p750.0_to_800.0	750	800	50.0 AA STEP	50	0	0	0	0	0	0	0	1	0	0			0	0	0	0	0	0
COL5A1	Collagen alpha-1(V) chain	CO5A1_HUMAN	50Step_Domain_p800.0_to_850.0	800	850	50.0 AA STEP	50	0	0	0	0	0	0	0	1	0	0			0	0	0	0	0	0
COL5A1	Collagen alpha-1(V) chain	CO5A1_HUMAN	50Step_Domain_p850.0_to_900.0	850	900	50.0 AA STEP	50	0	0	0	0	0	0	0	1	0	0			0	0	0	0	0	0
COL5A1	Collagen alpha-1(V) chain	CO5A1_HUMAN	50Step_Domain_p900.0_to_950.0	900	950	50.0 AA STEP	50	0	0	0	0	0	0	0	1	0	0			0	0	0	0	0	0
COL5A1	Collagen alpha-1(V) chain	CO5A1_HUMAN	50Step_Domain_p950.0_to_1000.0	950	1000	50.0 AA STEP	50	0	0	0	0	0	0	0	1	0	0			0	0	0	0	0	0
COL5A1	Collagen alpha-1(V) chain	CO5A1_HUMAN	50Step_Domain_p1000.0_to_1050.0	1000	1050	50.0 AA STEP	50	0	0	0	0	0	0	0	1	0	0			0	0	0	0	0	0
COL5A1	Collagen alpha-1(V) chain	CO5A1_HUMAN	50Step_Domain_p1050.0_to_1100.0	1050	1100	50.0 AA STEP	50	0	0	0	0	0	0	0	1	0	0			0	0	0	0	0	0
COL5A1	Collagen alpha-1(V) chain	CO5A1_HUMAN	50Step_Domain_p1100.0_to_1150.0	1100	1150	50.0 AA STEP	50	0	0	0	0	0	0	0	1	0	0			0	0	0	0	0	0
COL5A1	Collagen alpha-1(V) chain	CO5A1_HUMAN	50Step_Domain_p1150.0_to_1200.0	1150	1200	50.0 AA STEP	50	0	0	0	0	0	0	0	1	0	0			0	0	0	0	0	0
COL5A1	Collagen alpha-1(V) chain	CO5A1_HUMAN	50Step_Domain_p1200.0_to_1250.0	1200	1250	50.0 AA STEP	50	0	0	0	0	0	0	0	1	0	0			0	0	0	0	0	0
COL5A1	Collagen alpha-1(V) chain	CO5A1_HUMAN	50Step_Domain_p1250.0_to_1300.0	1250	1300	50.0 AA STEP	50	0	0	0	0	0	0	0	1	0	0			0	0	0	0	0	0
COL5A1	Collagen alpha-1(V) chain	CO5A1_HUMAN	50Step_Domain_p1300.0_to_1350.0	1300	1350	50.0 AA STEP	50	0	0	0	0	0	0	0	1	0	0			0	0	0	0	0	0
COL5A1	Collagen alpha-1(V) chain	CO5A1_HUMAN	50Step_Domain_p1350.0_to_1400.0	1350	1400	50.0 AA STEP	50	0	0	0	0	0	0	0	1	0	0			0	0	0	0	0	0
COL5A1	Collagen alpha-1(V) chain	CO5A1_HUMAN	50Step_Domain_p1400.0_to_1450.0	1400	1450	50.0 AA STEP	50	0	0	0	0	0	0	0	1	0	0			0	0	0	0	0	0
COL5A1	Collagen alpha-1(V) chain	CO5A1_HUMAN	50Step_Domain_p1450.0_to_1500.0	1450	1500	50.0 AA STEP	50	0	0	0	0	0	0	0	1	0	0			0	0	0	0	0	0
COL5A1	Collagen alpha-1(V) chain	CO5A1_HUMAN	50Step_Domain_p1500.0_to_1550.0	1500	1550	50.0 AA STEP	50	0	0	0	0	0	0	0	1	0	0			0	0	0	0	0	0
COL5A1	Collagen alpha-1(V) chain	CO5A1_HUMAN	50Step_Domain_p1550.0_to_1600.0	1550	1600	50.0 AA STEP	50	0	0	0	0	0	0	0	1	0	0			0	0	0	0	0	0
COL5A1	Collagen alpha-1(V) chain	CO5A1_HUMAN	50Step_Domain_p1600.0_to_1650.0	1600	1650	50.0 AA STEP	50	0	0	0	0	0	0	0	1	0	0			0	0	0	0	0	0
COL5A1	Collagen alpha-1(V) chain	CO5A1_HUMAN	50Step_Domain_p1650.0_to_1700.0	1650	1700	50.0 AA STEP	50	3	7	0	7	4	10	-0.08	0.0888	3	7	ENPGSWFSEFK ENPGSWFSEFK	ENPGSWFSEFK ENPGSWFSEFK ENPGSWFSEFK	2	6	0	12	4	6
COL5A1	Collagen alpha-1(V) chain	CO5A1_HUMAN	50Step_Domain_p1700.0_to_1750.0	1700	1750	50.0 AA STEP	50	3	9	0	11	6	10	-0.1	0	4	9	ENPGSWFSEFK ENPGSWFSEFK LLSYVDAEGNPVGVVQMTFLR	ENPGSWFSEFK LLSYVDAEGNPVGVVQMTFLR ENPGSWFSEFK LLSYVDAEGNPVGVVQMTFLR ENPGSWFSEFK	2	8	0	20	6	6
COL5A1	Collagen alpha-1(V) chain	CO5A1_HUMAN	50Step_Domain_p1750.0_to_1800.0	1750	1800	50.0 AA STEP	50	16	9	19	11	8	18	0.06	1	15	12	FLGSNDEEMSYDNNPYIR TVLEIDTPK FLGSNDEEMSYDNNPYIR TVLEIDTPK FLGSNDEEMSYDNNPYIR TVLEIDTPK	FLGSNDEEMSYDNNPYIR TVLEIDTPK FLGSNDEEMSYDNNPYIR TVLEIDTPK FLGSNDEEMSYDNNPYIR TVLEIDTPK	10	8	4	20	8	10
COL5A1	Collagen alpha-1(V) chain	CO5A1_HUMAN	50Step_Domain_p1800.0_to_1838.0	1800	1838	50.0 AA STEP	38	9	7	9	7	12	7	-0.0263158	1	8	9	TVLEIDTPK VEQVPIVDIMFNDFGEASQK TVLEIDTPK VEQVPIVDIMFNDFGEASQK TVLEIDTPK	TVLEIDTPK VEQVPIVDIMFNDFGEASQK TVLEIDTPK VEQVPIVDIMFNDFGEASQK TVLEIDTPK	6	6	2	12	12	4
COL5A1	Collagen alpha-1(V) chain	CO5A1_HUMAN	80Step_Domain_p0_to_80	0	80	80.0 AA STEP	80	0	2	9	0	0	0	0.05	0.0161	4	0	VLDFHNLPDGITK VLDFHNLPDGITK		0	2	2	0	0	0
COL5A1	Collagen alpha-1(V) chain	CO5A1_HUMAN	80Step_Domain_p80.0_to_160.0	80	160	80.0 AA STEP	80	3	0	0	1	2	0	0	1	1	1	QLYPASAFPEDFSILTTVK	QLYPASAFPEDFSILTTVK SPVFLYEDHTGKPGPEDYPLFR	2	0	0	2	2	0
COL5A1	Collagen alpha-1(V) chain	CO5A1_HUMAN	80Step_Domain_p160.0_to_240.0	160	240	80.0 AA STEP	80	0	2	0	1	2	0	0	1	1	1	ILDEEVFEGDIQQLLFVSDHR	ILDEEVFEGDIQQLLFVSDHR ILDEEVFEGDIQQLLFVSDHR	0	2	0	2	2	0
COL5A1	Collagen alpha-1(V) chain	CO5A1_HUMAN	80Step_Domain_p240.0_to_320.0	240	320	80.0 AA STEP	80	0	0	0	0	0	0	0	1	0	0			0	0	0	0	0	0
COL5A1	Collagen alpha-1(V) chain	CO5A1_HUMAN	80Step_Domain_p320.0_to_400.0	320	400	80.0 AA STEP	80	0	0	0	0	0	0	0	1	0	0			0	0	0	0	0	0
COL5A1	Collagen alpha-1(V) chain	CO5A1_HUMAN	80Step_Domain_p400.0_to_480.0	400	480	80.0 AA STEP	80	0	0	0	0	0	0	0	1	0	0			0	0	0	0	0	0
COL5A1	Collagen alpha-1(V) chain	CO5A1_HUMAN	80Step_Domain_p480.0_to_560.0	480	560	80.0 AA STEP	80	0	0	0	0	0	0	0	1	0	0			0	0	0	0	0	0
COL5A1	Collagen alpha-1(V) chain	CO5A1_HUMAN	80Step_Domain_p560.0_to_640.0	560	640	80.0 AA STEP	80	0	0	0	0	0	0	0	1	0	0			0	0	0	0	0	0
COL5A1	Collagen alpha-1(V) chain	CO5A1_HUMAN	80Step_Domain_p640.0_to_720.0	640	720	80.0 AA STEP	80	0	0	0	0	0	0	0	1	0	0			0	0	0	0	0	0
COL5A1	Collagen alpha-1(V) chain	CO5A1_HUMAN	80Step_Domain_p720.0_to_800.0	720	800	80.0 AA STEP	80	0	0	0	0	0	0	0	1	0	0			0	0	0	0	0	0
COL5A1	Collagen alpha-1(V) chain	CO5A1_HUMAN	80Step_Domain_p800.0_to_880.0	800	880	80.0 AA STEP	80	0	0	0	0	0	0	0	1	0	0			0	0	0	0	0	0
COL5A1	Collagen alpha-1(V) chain	CO5A1_HUMAN	80Step_Domain_p880.0_to_960.0	880	960	80.0 AA STEP	80	0	0	0	0	0	0	0	1	0	0			0	0	0	0	0	0
COL5A1	Collagen alpha-1(V) chain	CO5A1_HUMAN	80Step_Domain_p960.0_to_1040.0	960	1040	80.0 AA STEP	80	0	0	0	0	0	0	0	1	0	0			0	0	0	0	0	0
COL5A1	Collagen alpha-1(V) chain	CO5A1_HUMAN	80Step_Domain_p1040.0_to_1120.0	1040	1120	80.0 AA STEP	80	0	0	0	0	0	0	0	1	0	0			0	0	0	0	0	0
COL5A1	Collagen alpha-1(V) chain	CO5A1_HUMAN	80Step_Domain_p1120.0_to_1200.0	1120	1200	80.0 AA STEP	80	0	0	0	0	0	0	0	1	0	0			0	0	0	0	0	0
COL5A1	Collagen alpha-1(V) chain	CO5A1_HUMAN	80Step_Domain_p1200.0_to_1280.0	1200	1280	80.0 AA STEP	80	0	0	0	0	0	0	0	1	0	0			0	0	0	0	0	0
COL5A1	Collagen alpha-1(V) chain	CO5A1_HUMAN	80Step_Domain_p1280.0_to_1360.0	1280	1360	80.0 AA STEP	80	0	0	0	0	0	0	0	1	0	0			0	0	0	0	0	0
COL5A1	Collagen alpha-1(V) chain	CO5A1_HUMAN	80Step_Domain_p1360.0_to_1440.0	1360	1440	80.0 AA STEP	80	0	0	0	0	0	0	0	1	0	0			0	0	0	0	0	0
COL5A1	Collagen alpha-1(V) chain	CO5A1_HUMAN	80Step_Domain_p1440.0_to_1520.0	1440	1520	80.0 AA STEP	80	0	0	0	0	0	0	0	1	0	0			0	0	0	0	0	0
COL5A1	Collagen alpha-1(V) chain	CO5A1_HUMAN	80Step_Domain_p1520.0_to_1600.0	1520	1600	80.0 AA STEP	80	0	0	0	0	0	0	0	1	0	0			0	0	0	0	0	0
COL5A1	Collagen alpha-1(V) chain	CO5A1_HUMAN	80Step_Domain_p1600.0_to_1680.0	1600	1680	80.0 AA STEP	80	0	0	0	0	0	0	0	1	0	0			0	0	0	0	0	0
COL5A1	Collagen alpha-1(V) chain	CO5A1_HUMAN	80Step_Domain_p1680.0_to_1760.0	1680	1760	80.0 AA STEP	80	3	9	0	11	6	10	-0.0625	0	4	9	ENPGSWFSEFK ENPGSWFSEFK LLSYVDAEGNPVGVVQMTFLR	ENPGSWFSEFK LLSYVDAEGNPVGVVQMTFLR ENPGSWFSEFK LLSYVDAEGNPVGVVQMTFLR ENPGSWFSEFK	2	8	0	20	6	6
COL5A1	Collagen alpha-1(V) chain	CO5A1_HUMAN	80Step_Domain_p1760.0_to_1838.0	1760	1838	80.0 AA STEP	78	22	14	19	15	18	18	0.0128205	1	18	17	FLGSNDEEMSYDNNPYIR TVLEIDTPK VEQVPIVDIMFNDFGEASQK FLGSNDEEMSYDNNPYIR TVLEIDTPK VEQVPIVDIMFNDFGEASQK FLGSNDEEMSYDNNPYIR TVLEIDTPK	FLGSNDEEMSYDNNPYIR TVLEIDTPK VEQVPIVDIMFNDFGEASQK FLGSNDEEMSYDNNPYIR TVLEIDTPK VEQVPIVDIMFNDFGEASQK FLGSNDEEMSYDNNPYIR TVLEIDTPK	14	12	4	26	18	10
COL5A1	Collagen alpha-1(V) chain	CO5A1_HUMAN	100Step_Domain_p0_to_100	0	100	100.0 AA STEP	100	3	2	9	1	0	0	0.05	0.0323	5	0	QLYPASAFPEDFSILTTVK VLDFHNLPDGITK VLDFHNLPDGITK	QLYPASAFPEDFSILTTVK	2	2	2	2	0	0
COL5A1	Collagen alpha-1(V) chain	CO5A1_HUMAN	100Step_Domain_p100.0_to_200.0	100	200	100.0 AA STEP	100	3	0	0	1	2	0	0	1	1	1	QLYPASAFPEDFSILTTVK	QLYPASAFPEDFSILTTVK SPVFLYEDHTGKPGPEDYPLFR	2	0	0	2	2	0
COL5A1	Collagen alpha-1(V) chain	CO5A1_HUMAN	100Step_Domain_p200.0_to_300.0	200	300	100.0 AA STEP	100	0	2	0	1	2	0	0	1	1	1	ILDEEVFEGDIQQLLFVSDHR	ILDEEVFEGDIQQLLFVSDHR ILDEEVFEGDIQQLLFVSDHR	0	2	0	2	2	0
COL5A1	Collagen alpha-1(V) chain	CO5A1_HUMAN	100Step_Domain_p300.0_to_400.0	300	400	100.0 AA STEP	100	0	0	0	0	0	0	0	1	0	0			0	0	0	0	0	0
COL5A1	Collagen alpha-1(V) chain	CO5A1_HUMAN	100Step_Domain_p400.0_to_500.0	400	500	100.0 AA STEP	100	0	0	0	0	0	0	0	1	0	0			0	0	0	0	0	0
COL5A1	Collagen alpha-1(V) chain	CO5A1_HUMAN	100Step_Domain_p500.0_to_600.0	500	600	100.0 AA STEP	100	0	0	0	0	0	0	0	1	0	0			0	0	0	0	0	0
COL5A1	Collagen alpha-1(V) chain	CO5A1_HUMAN	100Step_Domain_p600.0_to_700.0	600	700	100.0 AA STEP	100	0	0	0	0	0	0	0	1	0	0			0	0	0	0	0	0
COL5A1	Collagen alpha-1(V) chain	CO5A1_HUMAN	100Step_Domain_p700.0_to_800.0	700	800	100.0 AA STEP	100	0	0	0	0	0	0	0	1	0	0			0	0	0	0	0	0
COL5A1	Collagen alpha-1(V) chain	CO5A1_HUMAN	100Step_Domain_p800.0_to_900.0	800	900	100.0 AA STEP	100	0	0	0	0	0	0	0	1	0	0			0	0	0	0	0	0
COL5A1	Collagen alpha-1(V) chain	CO5A1_HUMAN	100Step_Domain_p900.0_to_1000.0	900	1000	100.0 AA STEP	100	0	0	0	0	0	0	0	1	0	0			0	0	0	0	0	0
COL5A1	Collagen alpha-1(V) chain	CO5A1_HUMAN	100Step_Domain_p1000.0_to_1100.0	1000	1100	100.0 AA STEP	100	0	0	0	0	0	0	0	1	0	0			0	0	0	0	0	0
COL5A1	Collagen alpha-1(V) chain	CO5A1_HUMAN	100Step_Domain_p1100.0_to_1200.0	1100	1200	100.0 AA STEP	100	0	0	0	0	0	0	0	1	0	0			0	0	0	0	0	0
COL5A1	Collagen alpha-1(V) chain	CO5A1_HUMAN	100Step_Domain_p1200.0_to_1300.0	1200	1300	100.0 AA STEP	100	0	0	0	0	0	0	0	1	0	0			0	0	0	0	0	0
COL5A1	Collagen alpha-1(V) chain	CO5A1_HUMAN	100Step_Domain_p1300.0_to_1400.0	1300	1400	100.0 AA STEP	100	0	0	0	0	0	0	0	1	0	0			0	0	0	0	0	0
COL5A1	Collagen alpha-1(V) chain	CO5A1_HUMAN	100Step_Domain_p1400.0_to_1500.0	1400	1500	100.0 AA STEP	100	0	0	0	0	0	0	0	1	0	0			0	0	0	0	0	0
COL5A1	Collagen alpha-1(V) chain	CO5A1_HUMAN	100Step_Domain_p1500.0_to_1600.0	1500	1600	100.0 AA STEP	100	0	0	0	0	0	0	0	1	0	0			0	0	0	0	0	0
COL5A1	Collagen alpha-1(V) chain	CO5A1_HUMAN	100Step_Domain_p1600.0_to_1700.0	1600	1700	100.0 AA STEP	100	3	7	0	7	4	10	-0.04	0.1406	3	7	ENPGSWFSEFK ENPGSWFSEFK	ENPGSWFSEFK ENPGSWFSEFK ENPGSWFSEFK	2	6	0	12	4	6
COL5A1	Collagen alpha-1(V) chain	CO5A1_HUMAN	100Step_Domain_p1700.0_to_1800.0	1700	1800	100.0 AA STEP	100	19	19	19	22	14	28	-0.02	1	19	21	ENPGSWFSEFK FLGSNDEEMSYDNNPYIR TVLEIDTPK ENPGSWFSEFK FLGSNDEEMSYDNNPYIR LLSYVDAEGNPVGVVQMTFLR TVLEIDTPK FLGSNDEEMSYDNNPYIR TVLEIDTPK	ENPGSWFSEFK FLGSNDEEMSYDNNPYIR LLSYVDAEGNPVGVVQMTFLR TVLEIDTPK ENPGSWFSEFK FLGSNDEEMSYDNNPYIR LLSYVDAEGNPVGVVQMTFLR TVLEIDTPK ENPGSWFSEFK FLGSNDEEMSYDNNPYIR TVLEIDTPK	12	16	4	40	14	16
COL5A1	Collagen alpha-1(V) chain	CO5A1_HUMAN	100Step_Domain_p1800.0_to_1838.0	1800	1838	100.0 AA STEP	38	9	7	9	7	12	7	-0.0263158	1	8	9	TVLEIDTPK VEQVPIVDIMFNDFGEASQK TVLEIDTPK VEQVPIVDIMFNDFGEASQK TVLEIDTPK	TVLEIDTPK VEQVPIVDIMFNDFGEASQK TVLEIDTPK VEQVPIVDIMFNDFGEASQK TVLEIDTPK	6	6	2	12	12	4
HHIPL1	HHIP-like protein 1	HIPL1_HUMAN	50Step_Domain_p0_to_50	0	50	50.0 AA STEP	50	0	0	0	0	0	0	0	1	0	0			0	0	0	0	0	0
HHIPL1	HHIP-like protein 1	HIPL1_HUMAN	50Step_Domain_p50.0_to_100.0	50	100	50.0 AA STEP	50	0	0	0	0	0	0	0	1	0	0			0	0	0	0	0	0
HHIPL1	HHIP-like protein 1	HIPL1_HUMAN	50Step_Domain_p100.0_to_150.0	100	150	50.0 AA STEP	50	0	0	0	2	4	0	-0.04	0.0112	0	2		HLSTDQELWALEGNLAR HLSTDQELWALEGNLAR	0	0	0	4	2	0
HHIPL1	HHIP-like protein 1	HIPL1_HUMAN	50Step_Domain_p150.0_to_200.0	150	200	50.0 AA STEP	50	0	0	0	0	0	0	0	1	0	0			0	0	0	0	0	0
HHIPL1	HHIP-like protein 1	HIPL1_HUMAN	50Step_Domain_p200.0_to_250.0	200	250	50.0 AA STEP	50	3	5	3	2	0	0	0.06	0	4	1	VVLTSPWEGDER VVLTSPWEGDER VVLTSPWEGDER	VVLTSPWEGDER	6	4	2	4	0	0
HHIPL1	HHIP-like protein 1	HIPL1_HUMAN	50Step_Domain_p250.0_to_300.0	250	300	50.0 AA STEP	50	0	0	0	0	0	0	0	1	0	0			0	0	0	0	0	0
HHIPL1	HHIP-like protein 1	HIPL1_HUMAN	50Step_Domain_p300.0_to_350.0	300	350	50.0 AA STEP	50	0	0	0	0	0	0	0	1	0	0			0	0	0	0	0	0
HHIPL1	HHIP-like protein 1	HIPL1_HUMAN	50Step_Domain_p350.0_to_400.0	350	400	50.0 AA STEP	50	0	0	0	1	0	0	0	1	0	0		GLPYGIPPDNPFVGDPAAQPEVYALGVR	0	0	0	2	0	0
HHIPL1	HHIP-like protein 1	HIPL1_HUMAN	50Step_Domain_p400.0_to_450.0	400	450	50.0 AA STEP	50	1	0	3	1	4	0	-0.02	1	1	2	FEEVDVVER FEEVDVVER	FEEVDVVER FEEVDVVER	2	0	2	2	2	0
HHIPL1	HHIP-like protein 1	HIPL1_HUMAN	50Step_Domain_p450.0_to_500.0	450	500	50.0 AA STEP	50	0	0	0	0	0	0	0	1	0	0			0	0	0	0	0	0
HHIPL1	HHIP-like protein 1	HIPL1_HUMAN	50Step_Domain_p500.0_to_550.0	500	550	50.0 AA STEP	50	0	0	0	0	0	0	0	1	0	0			0	0	0	0	0	0
HHIPL1	HHIP-like protein 1	HIPL1_HUMAN	50Step_Domain_p550.0_to_600.0	550	600	50.0 AA STEP	50	0	0	0	0	0	0	0	1	0	0			0	0	0	0	0	0
HHIPL1	HHIP-like protein 1	HIPL1_HUMAN	50Step_Domain_p600.0_to_650.0	600	650	50.0 AA STEP	50	0	0	0	0	0	0	0	1	0	0			0	0	0	0	0	0
HHIPL1	HHIP-like protein 1	HIPL1_HUMAN	50Step_Domain_p650.0_to_700.0	650	700	50.0 AA STEP	50	1	0	0	1	0	0	0	1	0	0	VEVFVGGR	VEVFVGGR	2	0	0	2	0	0
HHIPL1	HHIP-like protein 1	HIPL1_HUMAN	50Step_Domain_p700.0_to_750.0	700	750	50.0 AA STEP	50	2	3	3	1	0	0	0.06	0.0016	3	0	AEFGQGGSLPILLDDVR RAEFGQGGSLPILLDDVR AEFGQGGSLPILLDDVR AEFGQGGSLPILLDDVR	AEFGQGGSLPILLDDVR	4	2	2	2	0	0
HHIPL1	HHIP-like protein 1	HIPL1_HUMAN	50Step_Domain_p750.0_to_782.0	750	782	50.0 AA STEP	32	0	0	0	0	0	0	0	1	0	0			0	0	0	0	0	0
HHIPL1	HHIP-like protein 1	HIPL1_HUMAN	80Step_Domain_p0_to_80	0	80	80.0 AA STEP	80	0	0	0	0	0	0	0	1	0	0			0	0	0	0	0	0
HHIPL1	HHIP-like protein 1	HIPL1_HUMAN	80Step_Domain_p80.0_to_160.0	80	160	80.0 AA STEP	80	0	0	0	2	4	0	-0.025	0.128	0	2		HLSTDQELWALEGNLAR HLSTDQELWALEGNLAR	0	0	0	4	2	0
HHIPL1	HHIP-like protein 1	HIPL1_HUMAN	80Step_Domain_p160.0_to_240.0	160	240	80.0 AA STEP	80	3	5	3	2	0	0	0.0375	0.003	4	1	VVLTSPWEGDER VVLTSPWEGDER VVLTSPWEGDER	VVLTSPWEGDER	6	4	2	4	0	0
HHIPL1	HHIP-like protein 1	HIPL1_HUMAN	80Step_Domain_p240.0_to_320.0	240	320	80.0 AA STEP	80	3	5	3	2	0	0	0.0375	0.003	4	1	VVLTSPWEGDER VVLTSPWEGDER VVLTSPWEGDER	VVLTSPWEGDER	6	4	2	4	0	0
HHIPL1	HHIP-like protein 1	HIPL1_HUMAN	80Step_Domain_p320.0_to_400.0	320	400	80.0 AA STEP	80	0	0	0	1	0	0	0	1	0	0		GLPYGIPPDNPFVGDPAAQPEVYALGVR	0	0	0	2	0	0
HHIPL1	HHIP-like protein 1	HIPL1_HUMAN	80Step_Domain_p400.0_to_480.0	400	480	80.0 AA STEP	80	1	0	3	1	4	0	-0.0125	1	1	2	FEEVDVVER FEEVDVVER	FEEVDVVER FEEVDVVER	2	0	2	2	2	0
HHIPL1	HHIP-like protein 1	HIPL1_HUMAN	80Step_Domain_p480.0_to_560.0	480	560	80.0 AA STEP	80	0	0	0	0	0	0	0	1	0	0			0	0	0	0	0	0
HHIPL1	HHIP-like protein 1	HIPL1_HUMAN	80Step_Domain_p560.0_to_640.0	560	640	80.0 AA STEP	80	0	0	0	0	0	0	0	1	0	0			0	0	0	0	0	0
HHIPL1	HHIP-like protein 1	HIPL1_HUMAN	80Step_Domain_p640.0_to_720.0	640	720	80.0 AA STEP	80	1	0	0	1	0	0	0	1	0	0	VEVFVGGR	VEVFVGGR	2	0	0	2	0	0
HHIPL1	HHIP-like protein 1	HIPL1_HUMAN	80Step_Domain_p720.0_to_782.0	720	782	80.0 AA STEP	62	2	3	3	1	0	0	0.0483871	0.042	3	0	AEFGQGGSLPILLDDVR RAEFGQGGSLPILLDDVR AEFGQGGSLPILLDDVR AEFGQGGSLPILLDDVR	AEFGQGGSLPILLDDVR	4	2	2	2	0	0
HHIPL1	HHIP-like protein 1	HIPL1_HUMAN	100Step_Domain_p0_to_100	0	100	100.0 AA STEP	100	0	0	0	0	0	0	0	1	0	0			0	0	0	0	0	0
HHIPL1	HHIP-like protein 1	HIPL1_HUMAN	100Step_Domain_p100.0_to_200.0	100	200	100.0 AA STEP	100	0	0	0	2	4	0	-0.02	0.132	0	2		HLSTDQELWALEGNLAR HLSTDQELWALEGNLAR	0	0	0	4	2	0
HHIPL1	HHIP-like protein 1	HIPL1_HUMAN	100Step_Domain_p200.0_to_300.0	200	300	100.0 AA STEP	100	3	5	3	2	0	0	0.03	0.0048	4	1	VVLTSPWEGDER VVLTSPWEGDER VVLTSPWEGDER	VVLTSPWEGDER	6	4	2	4	0	0
HHIPL1	HHIP-like protein 1	HIPL1_HUMAN	100Step_Domain_p300.0_to_400.0	300	400	100.0 AA STEP	100	0	0	0	1	0	0	0	1	0	0		GLPYGIPPDNPFVGDPAAQPEVYALGVR	0	0	0	2	0	0
HHIPL1	HHIP-like protein 1	HIPL1_HUMAN	100Step_Domain_p400.0_to_500.0	400	500	100.0 AA STEP	100	1	0	3	1	4	0	-0.01	1	1	2	FEEVDVVER FEEVDVVER	FEEVDVVER FEEVDVVER	2	0	2	2	2	0
HHIPL1	HHIP-like protein 1	HIPL1_HUMAN	100Step_Domain_p500.0_to_600.0	500	600	100.0 AA STEP	100	0	0	0	0	0	0	0	1	0	0			0	0	0	0	0	0
HHIPL1	HHIP-like protein 1	HIPL1_HUMAN	100Step_Domain_p600.0_to_700.0	600	700	100.0 AA STEP	100	1	0	0	1	0	0	0	1	0	0	VEVFVGGR	VEVFVGGR	2	0	0	2	0	0
HHIPL1	HHIP-like protein 1	HIPL1_HUMAN	100Step_Domain_p700.0_to_782.0	700	782	100.0 AA STEP	82	2	3	3	1	0	0	0.0365854	0.0472	3	0	AEFGQGGSLPILLDDVR RAEFGQGGSLPILLDDVR AEFGQGGSLPILLDDVR AEFGQGGSLPILLDDVR	AEFGQGGSLPILLDDVR	4	2	2	2	0	0
N/A	cDNA FLJ56912; highly similar to Fibulin-2	B7Z9B8_HUMAN	Disordered	247	319	REGIONS	72	0	0	0	0	0	0	0	1	0	0			0	0	0	0	0	0
N/A	cDNA FLJ56912; highly similar to Fibulin-2	B7Z9B8_HUMAN	Disordered_434_463	434	463	REGIONS	29	0	0	0	0	0	0	0	1	0	0			0	0	0	0	0	0
N/A	cDNA FLJ56912; highly similar to Fibulin-2	B7Z9B8_HUMAN	Anaphylatoxin-like	471	506	DOMAINS	35	0	0	0	0	0	0	0	1	0	0			0	0	0	0	0	0
N/A	cDNA FLJ56912; highly similar to Fibulin-2	B7Z9B8_HUMAN	Anaphylatoxin-like_514_545	514	545	DOMAINS	31	0	0	0	0	0	0	0	1	0	0			0	0	0	0	0	0
N/A	cDNA FLJ56912; highly similar to Fibulin-2	B7Z9B8_HUMAN	Anaphylatoxin-like_547_579	547	579	DOMAINS	32	0	0	0	0	0	0	0	1	0	0			0	0	0	0	0	0
N/A	cDNA FLJ56912; highly similar to Fibulin-2	B7Z9B8_HUMAN	EGF-like	630	671	DOMAINS	41	0	0	0	0	0	0	0	1	0	0			0	0	0	0	0	0
N/A	cDNA FLJ56912; highly similar to Fibulin-2	B7Z9B8_HUMAN	EGF-like_884_922	884	922	DOMAINS	38	0	0	0	0	0	0	0	1	0	0			0	0	0	0	0	0
N/A	cDNA FLJ56912; highly similar to Fibulin-2	B7Z9B8_HUMAN	EGF-like_927_968	927	968	DOMAINS	41	0	0	0	0	0	0	0	1	0	0			0	0	0	0	0	0
N/A	cDNA FLJ56912; highly similar to Fibulin-2	B7Z9B8_HUMAN	EGF-like_969_1007	969	1007	DOMAINS	38	0	0	0	0	0	0	0	1	0	0			0	0	0	0	0	0
N/A	cDNA FLJ56912; highly similar to Fibulin-2	B7Z9B8_HUMAN	50Step_Domain_p0_to_50	0	50	50.0 AA STEP	50	0	0	0	0	0	0	0	1	0	0			0	0	0	0	0	0
N/A	cDNA FLJ56912; highly similar to Fibulin-2	B7Z9B8_HUMAN	50Step_Domain_p50.0_to_100.0	50	100	50.0 AA STEP	50	0	0	0	0	0	0	0	1	0	0			0	0	0	0	0	0
N/A	cDNA FLJ56912; highly similar to Fibulin-2	B7Z9B8_HUMAN	50Step_Domain_p100.0_to_150.0	100	150	50.0 AA STEP	50	0	0	0	0	0	0	0	1	0	0			0	0	0	0	0	0
N/A	cDNA FLJ56912; highly similar to Fibulin-2	B7Z9B8_HUMAN	50Step_Domain_p150.0_to_200.0	150	200	50.0 AA STEP	50	0	0	0	0	0	0	0	1	0	0			0	0	0	0	0	0
N/A	cDNA FLJ56912; highly similar to Fibulin-2	B7Z9B8_HUMAN	50Step_Domain_p200.0_to_250.0	200	250	50.0 AA STEP	50	0	0	0	0	0	0	0	1	0	0			0	0	0	0	0	0
N/A	cDNA FLJ56912; highly similar to Fibulin-2	B7Z9B8_HUMAN	50Step_Domain_p250.0_to_300.0	250	300	50.0 AA STEP	50	0	0	0	0	0	0	0	1	0	0			0	0	0	0	0	0
N/A	cDNA FLJ56912; highly similar to Fibulin-2	B7Z9B8_HUMAN	50Step_Domain_p300.0_to_350.0	300	350	50.0 AA STEP	50	0	0	0	0	0	0	0	1	0	0			0	0	0	0	0	0
N/A	cDNA FLJ56912; highly similar to Fibulin-2	B7Z9B8_HUMAN	50Step_Domain_p350.0_to_400.0	350	400	50.0 AA STEP	50	0	0	0	0	0	0	0	1	0	0			0	0	0	0	0	0
N/A	cDNA FLJ56912; highly similar to Fibulin-2	B7Z9B8_HUMAN	50Step_Domain_p400.0_to_450.0	400	450	50.0 AA STEP	50	0	0	0	0	0	0	0	1	0	0			0	0	0	0	0	0
N/A	cDNA FLJ56912; highly similar to Fibulin-2	B7Z9B8_HUMAN	50Step_Domain_p450.0_to_500.0	450	500	50.0 AA STEP	50	0	0	0	0	0	0	0	1	0	0			0	0	0	0	0	0
N/A	cDNA FLJ56912; highly similar to Fibulin-2	B7Z9B8_HUMAN	50Step_Domain_p500.0_to_550.0	500	550	50.0 AA STEP	50	0	0	0	0	0	0	0	1	0	0			0	0	0	0	0	0
N/A	cDNA FLJ56912; highly similar to Fibulin-2	B7Z9B8_HUMAN	50Step_Domain_p550.0_to_600.0	550	600	50.0 AA STEP	50	0	0	0	0	0	0	0	1	0	0			0	0	0	0	0	0
N/A	cDNA FLJ56912; highly similar to Fibulin-2	B7Z9B8_HUMAN	50Step_Domain_p600.0_to_650.0	600	650	50.0 AA STEP	50	0	0	0	0	0	0	0	1	0	0			0	0	0	0	0	0
N/A	cDNA FLJ56912; highly similar to Fibulin-2	B7Z9B8_HUMAN	50Step_Domain_p650.0_to_700.0	650	700	50.0 AA STEP	50	0	0	0	0	0	0	0	1	0	0			0	0	0	0	0	0
N/A	cDNA FLJ56912; highly similar to Fibulin-2	B7Z9B8_HUMAN	50Step_Domain_p700.0_to_750.0	700	750	50.0 AA STEP	50	0	0	0	0	0	0	0	1	0	0			0	0	0	0	0	0
N/A	cDNA FLJ56912; highly similar to Fibulin-2	B7Z9B8_HUMAN	50Step_Domain_p750.0_to_800.0	750	800	50.0 AA STEP	50	0	0	0	0	0	0	0	1	0	0			0	0	0	0	0	0
N/A	cDNA FLJ56912; highly similar to Fibulin-2	B7Z9B8_HUMAN	50Step_Domain_p800.0_to_850.0	800	850	50.0 AA STEP	50	0	0	0	0	0	0	0	1	0	0			0	0	0	0	0	0
N/A	cDNA FLJ56912; highly similar to Fibulin-2	B7Z9B8_HUMAN	50Step_Domain_p850.0_to_900.0	850	900	50.0 AA STEP	50	0	0	0	0	0	0	0	1	0	0			0	0	0	0	0	0
N/A	cDNA FLJ56912; highly similar to Fibulin-2	B7Z9B8_HUMAN	50Step_Domain_p900.0_to_950.0	900	950	50.0 AA STEP	50	0	0	0	0	0	0	0	1	0	0			0	0	0	0	0	0
N/A	cDNA FLJ56912; highly similar to Fibulin-2	B7Z9B8_HUMAN	50Step_Domain_p950.0_to_1000.0	950	1000	50.0 AA STEP	50	0	0	0	0	0	0	0	1	0	0			0	0	0	0	0	0
N/A	cDNA FLJ56912; highly similar to Fibulin-2	B7Z9B8_HUMAN	50Step_Domain_p1000.0_to_1050.0	1000	1050	50.0 AA STEP	50	0	0	0	0	0	0	0	1	0	0			0	0	0	0	0	0
N/A	cDNA FLJ56912; highly similar to Fibulin-2	B7Z9B8_HUMAN	50Step_Domain_p1050.0_to_1100.0	1050	1100	50.0 AA STEP	50	0	0	0	0	0	0	0	1	0	0			0	0	0	0	0	0
N/A	cDNA FLJ56912; highly similar to Fibulin-2	B7Z9B8_HUMAN	50Step_Domain_p1100.0_to_1150.0	1100	1150	50.0 AA STEP	50	2	3	0	0	2	0	0.02	0.015	2	1	IGPAPAFTGDTIALNIIK IGPAPAFTGDTIALNIIK	IGPAPAFTGDTIALNIIK	2	4	0	0	4	0
N/A	cDNA FLJ56912; highly similar to Fibulin-2	B7Z9B8_HUMAN	50Step_Domain_p1150.0_to_1200.0	1150	1200	50.0 AA STEP	50	2	1	0	0	2	0	0	1	1	1	DFALDVEMK DFALDVEMK	DFALDVEMK QGSVTTFLAK	2	2	0	0	4	0
N/A	cDNA FLJ56912; highly similar to Fibulin-2	B7Z9B8_HUMAN	50Step_Domain_p1200.0_to_1210.0	1200	1210	50.0 AA STEP	10	0	0	0	0	0	0	0	1	0	0			0	0	0	0	0	0
N/A	cDNA FLJ56912; highly similar to Fibulin-2	B7Z9B8_HUMAN	80Step_Domain_p0_to_80	0	80	80.0 AA STEP	80	0	0	0	0	0	0	0	1	0	0			0	0	0	0	0	0
N/A	cDNA FLJ56912; highly similar to Fibulin-2	B7Z9B8_HUMAN	80Step_Domain_p80.0_to_160.0	80	160	80.0 AA STEP	80	0	0	0	0	0	0	0	1	0	0			0	0	0	0	0	0
N/A	cDNA FLJ56912; highly similar to Fibulin-2	B7Z9B8_HUMAN	80Step_Domain_p160.0_to_240.0	160	240	80.0 AA STEP	80	0	0	0	0	0	0	0	1	0	0			0	0	0	0	0	0
N/A	cDNA FLJ56912; highly similar to Fibulin-2	B7Z9B8_HUMAN	80Step_Domain_p240.0_to_320.0	240	320	80.0 AA STEP	80	0	0	0	0	0	0	0	1	0	0			0	0	0	0	0	0
N/A	cDNA FLJ56912; highly similar to Fibulin-2	B7Z9B8_HUMAN	80Step_Domain_p320.0_to_400.0	320	400	80.0 AA STEP	80	0	0	0	0	0	0	0	1	0	0			0	0	0	0	0	0
N/A	cDNA FLJ56912; highly similar to Fibulin-2	B7Z9B8_HUMAN	80Step_Domain_p400.0_to_480.0	400	480	80.0 AA STEP	80	0	0	0	0	0	0	0	1	0	0			0	0	0	0	0	0
N/A	cDNA FLJ56912; highly similar to Fibulin-2	B7Z9B8_HUMAN	80Step_Domain_p480.0_to_560.0	480	560	80.0 AA STEP	80	0	0	0	0	0	0	0	1	0	0			0	0	0	0	0	0
N/A	cDNA FLJ56912; highly similar to Fibulin-2	B7Z9B8_HUMAN	80Step_Domain_p560.0_to_640.0	560	640	80.0 AA STEP	80	0	0	0	0	0	0	0	1	0	0			0	0	0	0	0	0
N/A	cDNA FLJ56912; highly similar to Fibulin-2	B7Z9B8_HUMAN	80Step_Domain_p640.0_to_720.0	640	720	80.0 AA STEP	80	0	0	0	0	0	0	0	1	0	0			0	0	0	0	0	0
N/A	cDNA FLJ56912; highly similar to Fibulin-2	B7Z9B8_HUMAN	80Step_Domain_p720.0_to_800.0	720	800	80.0 AA STEP	80	0	0	0	0	0	0	0	1	0	0			0	0	0	0	0	0
N/A	cDNA FLJ56912; highly similar to Fibulin-2	B7Z9B8_HUMAN	80Step_Domain_p800.0_to_880.0	800	880	80.0 AA STEP	80	0	0	0	0	0	0	0	1	0	0			0	0	0	0	0	0
N/A	cDNA FLJ56912; highly similar to Fibulin-2	B7Z9B8_HUMAN	80Step_Domain_p880.0_to_960.0	880	960	80.0 AA STEP	80	0	0	0	0	0	0	0	1	0	0			0	0	0	0	0	0
N/A	cDNA FLJ56912; highly similar to Fibulin-2	B7Z9B8_HUMAN	80Step_Domain_p960.0_to_1040.0	960	1040	80.0 AA STEP	80	0	0	0	0	0	0	0	1	0	0			0	0	0	0	0	0
N/A	cDNA FLJ56912; highly similar to Fibulin-2	B7Z9B8_HUMAN	80Step_Domain_p1040.0_to_1120.0	1040	1120	80.0 AA STEP	80	0	0	0	0	0	0	0	1	0	0			0	0	0	0	0	0
N/A	cDNA FLJ56912; highly similar to Fibulin-2	B7Z9B8_HUMAN	80Step_Domain_p1120.0_to_1200.0	1120	1200	80.0 AA STEP	80	4	4	0	0	4	0	0.025	0.0992	3	1	DFALDVEMK IGPAPAFTGDTIALNIIK DFALDVEMK IGPAPAFTGDTIALNIIK	DFALDVEMK IGPAPAFTGDTIALNIIK QGSVTTFLAK	4	6	0	0	8	0
N/A	cDNA FLJ56912; highly similar to Fibulin-2	B7Z9B8_HUMAN	80Step_Domain_p1200.0_to_1210.0	1200	1210	80.0 AA STEP	10	0	0	0	0	0	0	0	1	0	0			0	0	0	0	0	0
N/A	cDNA FLJ56912; highly similar to Fibulin-2	B7Z9B8_HUMAN	100Step_Domain_p0_to_100	0	100	100.0 AA STEP	100	0	0	0	0	0	0	0	1	0	0			0	0	0	0	0	0
N/A	cDNA FLJ56912; highly similar to Fibulin-2	B7Z9B8_HUMAN	100Step_Domain_p100.0_to_200.0	100	200	100.0 AA STEP	100	0	0	0	0	0	0	0	1	0	0			0	0	0	0	0	0
N/A	cDNA FLJ56912; highly similar to Fibulin-2	B7Z9B8_HUMAN	100Step_Domain_p200.0_to_300.0	200	300	100.0 AA STEP	100	0	0	0	0	0	0	0	1	0	0			0	0	0	0	0	0
N/A	cDNA FLJ56912; highly similar to Fibulin-2	B7Z9B8_HUMAN	100Step_Domain_p300.0_to_400.0	300	400	100.0 AA STEP	100	0	0	0	0	0	0	0	1	0	0			0	0	0	0	0	0
N/A	cDNA FLJ56912; highly similar to Fibulin-2	B7Z9B8_HUMAN	100Step_Domain_p400.0_to_500.0	400	500	100.0 AA STEP	100	0	0	0	0	0	0	0	1	0	0			0	0	0	0	0	0
N/A	cDNA FLJ56912; highly similar to Fibulin-2	B7Z9B8_HUMAN	100Step_Domain_p500.0_to_600.0	500	600	100.0 AA STEP	100	0	0	0	0	0	0	0	1	0	0			0	0	0	0	0	0
N/A	cDNA FLJ56912; highly similar to Fibulin-2	B7Z9B8_HUMAN	100Step_Domain_p600.0_to_700.0	600	700	100.0 AA STEP	100	0	0	0	0	0	0	0	1	0	0			0	0	0	0	0	0
N/A	cDNA FLJ56912; highly similar to Fibulin-2	B7Z9B8_HUMAN	100Step_Domain_p700.0_to_800.0	700	800	100.0 AA STEP	100	0	0	0	0	0	0	0	1	0	0			0	0	0	0	0	0
N/A	cDNA FLJ56912; highly similar to Fibulin-2	B7Z9B8_HUMAN	100Step_Domain_p800.0_to_900.0	800	900	100.0 AA STEP	100	0	0	0	0	0	0	0	1	0	0			0	0	0	0	0	0
N/A	cDNA FLJ56912; highly similar to Fibulin-2	B7Z9B8_HUMAN	100Step_Domain_p900.0_to_1000.0	900	1000	100.0 AA STEP	100	0	0	0	0	0	0	0	1	0	0			0	0	0	0	0	0
N/A	cDNA FLJ56912; highly similar to Fibulin-2	B7Z9B8_HUMAN	100Step_Domain_p1000.0_to_1100.0	1000	1100	100.0 AA STEP	100	0	0	0	0	0	0	0	1	0	0			0	0	0	0	0	0
N/A	cDNA FLJ56912; highly similar to Fibulin-2	B7Z9B8_HUMAN	100Step_Domain_p1100.0_to_1200.0	1100	1200	100.0 AA STEP	100	4	4	0	0	4	0	0.02	0.1794	3	1	DFALDVEMK IGPAPAFTGDTIALNIIK DFALDVEMK IGPAPAFTGDTIALNIIK	DFALDVEMK IGPAPAFTGDTIALNIIK QGSVTTFLAK	4	6	0	0	8	0
N/A	cDNA FLJ56912; highly similar to Fibulin-2	B7Z9B8_HUMAN	100Step_Domain_p1200.0_to_1210.0	1200	1210	100.0 AA STEP	10	0	0	0	0	0	0	0	1	0	0			0	0	0	0	0	0
FBLN2	Fibulin-2	FBLN2_HUMAN	Subdomain NA (Cys-rich)	28	177	REGIONS	149	0	0	0	0	0	0	0	1	0	0			0	0	0	0	0	0
FBLN2	Fibulin-2	FBLN2_HUMAN	Subdomain NB (Cys-free)	178	444	REGIONS	266	0	0	0	0	0	0	0	1	0	0			0	0	0	0	0	0
FBLN2	Fibulin-2	FBLN2_HUMAN	Domain III	1070	1184	REGIONS	114	4	4	0	0	4	0	0.0175439	0.7326	3	1	DFALDVEMK IGPAPAFTGDTIALNIIK DFALDVEMK IGPAPAFTGDTIALNIIK	DFALDVEMK IGPAPAFTGDTIALNIIK QGSVTTFLAK	4	6	0	0	8	0
FBLN2	Fibulin-2	FBLN2_HUMAN	Anaphylatoxin-like 1	445	480	DOMAINS	35	0	0	0	0	0	0	0	1	0	0			0	0	0	0	0	0
FBLN2	Fibulin-2	FBLN2_HUMAN	Anaphylatoxin-like 2	488	519	DOMAINS	31	0	0	0	0	0	0	0	1	0	0			0	0	0	0	0	0
FBLN2	Fibulin-2	FBLN2_HUMAN	Anaphylatoxin-like 3	521	553	DOMAINS	32	0	0	0	0	0	0	0	1	0	0			0	0	0	0	0	0
FBLN2	Fibulin-2	FBLN2_HUMAN	EGF-like 1; calcium-binding	604	645	DOMAINS	41	0	0	0	0	0	0	0	1	0	0			0	0	0	0	0	0
FBLN2	Fibulin-2	FBLN2_HUMAN	EGF-like 2	679	718	DOMAINS	39	0	0	0	0	0	0	0	1	0	0			0	0	0	0	0	0
FBLN2	Fibulin-2	FBLN2_HUMAN	EGF-like 3; calcium-binding	719	763	DOMAINS	44	0	0	0	0	0	0	0	1	0	0			0	0	0	0	0	0
FBLN2	Fibulin-2	FBLN2_HUMAN	EGF-like 4; calcium-binding	764	809	DOMAINS	45	0	0	0	0	0	0	0	1	0	0			0	0	0	0	0	0
FBLN2	Fibulin-2	FBLN2_HUMAN	EGF-like 5; calcium-binding	810	857	DOMAINS	47	0	0	0	0	0	0	0	1	0	0			0	0	0	0	0	0
FBLN2	Fibulin-2	FBLN2_HUMAN	EGF-like 6; calcium-binding	858	900	DOMAINS	42	0	0	0	0	0	0	0	1	0	0			0	0	0	0	0	0
FBLN2	Fibulin-2	FBLN2_HUMAN	EGF-like 7; calcium-binding	901	942	DOMAINS	41	0	0	0	0	0	0	0	1	0	0			0	0	0	0	0	0
FBLN2	Fibulin-2	FBLN2_HUMAN	EGF-like 8; calcium-binding	943	981	DOMAINS	38	0	0	0	0	0	0	0	1	0	0			0	0	0	0	0	0
FBLN2	Fibulin-2	FBLN2_HUMAN	EGF-like 9; calcium-binding	982	1024	DOMAINS	42	0	0	0	0	0	0	0	1	0	0			0	0	0	0	0	0
FBLN2	Fibulin-2	FBLN2_HUMAN	EGF-like 10; calcium-binding	1025	1069	DOMAINS	44	0	0	0	0	0	0	0	1	0	0			0	0	0	0	0	0
FBLN2	Fibulin-2	FBLN2_HUMAN	50Step_Domain_p0_to_50	0	50	50.0 AA STEP	50	0	0	0	0	0	0	0	1	0	0			0	0	0	0	0	0
FBLN2	Fibulin-2	FBLN2_HUMAN	50Step_Domain_p50.0_to_100.0	50	100	50.0 AA STEP	50	0	0	0	0	0	0	0	1	0	0			0	0	0	0	0	0
FBLN2	Fibulin-2	FBLN2_HUMAN	50Step_Domain_p100.0_to_150.0	100	150	50.0 AA STEP	50	0	0	0	0	0	0	0	1	0	0			0	0	0	0	0	0
FBLN2	Fibulin-2	FBLN2_HUMAN	50Step_Domain_p150.0_to_200.0	150	200	50.0 AA STEP	50	0	0	0	0	0	0	0	1	0	0			0	0	0	0	0	0
FBLN2	Fibulin-2	FBLN2_HUMAN	50Step_Domain_p200.0_to_250.0	200	250	50.0 AA STEP	50	0	0	0	0	0	0	0	1	0	0			0	0	0	0	0	0
FBLN2	Fibulin-2	FBLN2_HUMAN	50Step_Domain_p250.0_to_300.0	250	300	50.0 AA STEP	50	0	0	0	0	0	0	0	1	0	0			0	0	0	0	0	0
FBLN2	Fibulin-2	FBLN2_HUMAN	50Step_Domain_p300.0_to_350.0	300	350	50.0 AA STEP	50	0	0	0	0	0	0	0	1	0	0			0	0	0	0	0	0
FBLN2	Fibulin-2	FBLN2_HUMAN	50Step_Domain_p350.0_to_400.0	350	400	50.0 AA STEP	50	0	0	0	0	0	0	0	1	0	0			0	0	0	0	0	0
FBLN2	Fibulin-2	FBLN2_HUMAN	50Step_Domain_p400.0_to_450.0	400	450	50.0 AA STEP	50	0	0	0	0	0	0	0	1	0	0			0	0	0	0	0	0
FBLN2	Fibulin-2	FBLN2_HUMAN	50Step_Domain_p450.0_to_500.0	450	500	50.0 AA STEP	50	0	0	0	0	0	0	0	1	0	0			0	0	0	0	0	0
FBLN2	Fibulin-2	FBLN2_HUMAN	50Step_Domain_p500.0_to_550.0	500	550	50.0 AA STEP	50	0	0	0	0	0	0	0	1	0	0			0	0	0	0	0	0
FBLN2	Fibulin-2	FBLN2_HUMAN	50Step_Domain_p550.0_to_600.0	550	600	50.0 AA STEP	50	0	0	0	0	0	0	0	1	0	0			0	0	0	0	0	0
FBLN2	Fibulin-2	FBLN2_HUMAN	50Step_Domain_p600.0_to_650.0	600	650	50.0 AA STEP	50	0	0	0	0	0	0	0	1	0	0			0	0	0	0	0	0
FBLN2	Fibulin-2	FBLN2_HUMAN	50Step_Domain_p650.0_to_700.0	650	700	50.0 AA STEP	50	0	0	0	0	0	0	0	1	0	0			0	0	0	0	0	0
FBLN2	Fibulin-2	FBLN2_HUMAN	50Step_Domain_p700.0_to_750.0	700	750	50.0 AA STEP	50	0	0	0	0	0	0	0	1	0	0			0	0	0	0	0	0
FBLN2	Fibulin-2	FBLN2_HUMAN	50Step_Domain_p750.0_to_800.0	750	800	50.0 AA STEP	50	0	0	0	0	0	0	0	1	0	0			0	0	0	0	0	0
FBLN2	Fibulin-2	FBLN2_HUMAN	50Step_Domain_p800.0_to_850.0	800	850	50.0 AA STEP	50	0	0	0	0	0	0	0	1	0	0			0	0	0	0	0	0
FBLN2	Fibulin-2	FBLN2_HUMAN	50Step_Domain_p850.0_to_900.0	850	900	50.0 AA STEP	50	0	0	0	0	0	0	0	1	0	0			0	0	0	0	0	0
FBLN2	Fibulin-2	FBLN2_HUMAN	50Step_Domain_p900.0_to_950.0	900	950	50.0 AA STEP	50	0	0	0	0	0	0	0	1	0	0			0	0	0	0	0	0
FBLN2	Fibulin-2	FBLN2_HUMAN	50Step_Domain_p950.0_to_1000.0	950	1000	50.0 AA STEP	50	0	0	0	0	0	0	0	1	0	0			0	0	0	0	0	0
FBLN2	Fibulin-2	FBLN2_HUMAN	50Step_Domain_p1000.0_to_1050.0	1000	1050	50.0 AA STEP	50	0	0	0	0	0	0	0	1	0	0			0	0	0	0	0	0
FBLN2	Fibulin-2	FBLN2_HUMAN	50Step_Domain_p1050.0_to_1100.0	1050	1100	50.0 AA STEP	50	0	0	0	0	0	0	0	1	0	0			0	0	0	0	0	0
FBLN2	Fibulin-2	FBLN2_HUMAN	50Step_Domain_p1100.0_to_1150.0	1100	1150	50.0 AA STEP	50	2	3	0	0	2	0	0.02	0.0192	2	1	IGPAPAFTGDTIALNIIK IGPAPAFTGDTIALNIIK	IGPAPAFTGDTIALNIIK	2	4	0	0	4	0
FBLN2	Fibulin-2	FBLN2_HUMAN	50Step_Domain_p1150.0_to_1184.0	1150	1184	50.0 AA STEP	34	2	1	0	0	2	0	0	1	1	1	DFALDVEMK DFALDVEMK	DFALDVEMK QGSVTTFLAK	2	2	0	0	4	0
FBLN2	Fibulin-2	FBLN2_HUMAN	80Step_Domain_p0_to_80	0	80	80.0 AA STEP	80	0	0	0	0	0	0	0	1	0	0			0	0	0	0	0	0
FBLN2	Fibulin-2	FBLN2_HUMAN	80Step_Domain_p80.0_to_160.0	80	160	80.0 AA STEP	80	0	0	0	0	0	0	0	1	0	0			0	0	0	0	0	0
FBLN2	Fibulin-2	FBLN2_HUMAN	80Step_Domain_p160.0_to_240.0	160	240	80.0 AA STEP	80	0	0	0	0	0	0	0	1	0	0			0	0	0	0	0	0
FBLN2	Fibulin-2	FBLN2_HUMAN	80Step_Domain_p240.0_to_320.0	240	320	80.0 AA STEP	80	0	0	0	0	0	0	0	1	0	0			0	0	0	0	0	0
FBLN2	Fibulin-2	FBLN2_HUMAN	80Step_Domain_p320.0_to_400.0	320	400	80.0 AA STEP	80	0	0	0	0	0	0	0	1	0	0			0	0	0	0	0	0
FBLN2	Fibulin-2	FBLN2_HUMAN	80Step_Domain_p400.0_to_480.0	400	480	80.0 AA STEP	80	0	0	0	0	0	0	0	1	0	0			0	0	0	0	0	0
FBLN2	Fibulin-2	FBLN2_HUMAN	80Step_Domain_p480.0_to_560.0	480	560	80.0 AA STEP	80	0	0	0	0	0	0	0	1	0	0			0	0	0	0	0	0
FBLN2	Fibulin-2	FBLN2_HUMAN	80Step_Domain_p560.0_to_640.0	560	640	80.0 AA STEP	80	0	0	0	0	0	0	0	1	0	0			0	0	0	0	0	0
FBLN2	Fibulin-2	FBLN2_HUMAN	80Step_Domain_p640.0_to_720.0	640	720	80.0 AA STEP	80	0	0	0	0	0	0	0	1	0	0			0	0	0	0	0	0
FBLN2	Fibulin-2	FBLN2_HUMAN	80Step_Domain_p720.0_to_800.0	720	800	80.0 AA STEP	80	0	0	0	0	0	0	0	1	0	0			0	0	0	0	0	0
FBLN2	Fibulin-2	FBLN2_HUMAN	80Step_Domain_p800.0_to_880.0	800	880	80.0 AA STEP	80	0	0	0	0	0	0	0	1	0	0			0	0	0	0	0	0
FBLN2	Fibulin-2	FBLN2_HUMAN	80Step_Domain_p880.0_to_960.0	880	960	80.0 AA STEP	80	0	0	0	0	0	0	0	1	0	0			0	0	0	0	0	0
FBLN2	Fibulin-2	FBLN2_HUMAN	80Step_Domain_p960.0_to_1040.0	960	1040	80.0 AA STEP	80	0	0	0	0	0	0	0	1	0	0			0	0	0	0	0	0
FBLN2	Fibulin-2	FBLN2_HUMAN	80Step_Domain_p1040.0_to_1120.0	1040	1120	80.0 AA STEP	80	2	3	0	0	2	0	0.0125	1	2	1	IGPAPAFTGDTIALNIIK IGPAPAFTGDTIALNIIK	IGPAPAFTGDTIALNIIK	2	4	0	0	4	0
FBLN2	Fibulin-2	FBLN2_HUMAN	80Step_Domain_p1120.0_to_1184.0	1120	1184	80.0 AA STEP	64	4	4	0	0	4	0	0.03125	0.321	3	1	DFALDVEMK IGPAPAFTGDTIALNIIK DFALDVEMK IGPAPAFTGDTIALNIIK	DFALDVEMK IGPAPAFTGDTIALNIIK QGSVTTFLAK	4	6	0	0	8	0
FBLN2	Fibulin-2	FBLN2_HUMAN	100Step_Domain_p0_to_100	0	100	100.0 AA STEP	100	0	0	0	0	0	0	0	1	0	0			0	0	0	0	0	0
FBLN2	Fibulin-2	FBLN2_HUMAN	100Step_Domain_p100.0_to_200.0	100	200	100.0 AA STEP	100	0	0	0	0	0	0	0	1	0	0			0	0	0	0	0	0
FBLN2	Fibulin-2	FBLN2_HUMAN	100Step_Domain_p200.0_to_300.0	200	300	100.0 AA STEP	100	0	0	0	0	0	0	0	1	0	0			0	0	0	0	0	0
FBLN2	Fibulin-2	FBLN2_HUMAN	100Step_Domain_p300.0_to_400.0	300	400	100.0 AA STEP	100	0	0	0	0	0	0	0	1	0	0			0	0	0	0	0	0
FBLN2	Fibulin-2	FBLN2_HUMAN	100Step_Domain_p400.0_to_500.0	400	500	100.0 AA STEP	100	0	0	0	0	0	0	0	1	0	0			0	0	0	0	0	0
FBLN2	Fibulin-2	FBLN2_HUMAN	100Step_Domain_p500.0_to_600.0	500	600	100.0 AA STEP	100	0	0	0	0	0	0	0	1	0	0			0	0	0	0	0	0
FBLN2	Fibulin-2	FBLN2_HUMAN	100Step_Domain_p600.0_to_700.0	600	700	100.0 AA STEP	100	0	0	0	0	0	0	0	1	0	0			0	0	0	0	0	0
FBLN2	Fibulin-2	FBLN2_HUMAN	100Step_Domain_p700.0_to_800.0	700	800	100.0 AA STEP	100	0	0	0	0	0	0	0	1	0	0			0	0	0	0	0	0
FBLN2	Fibulin-2	FBLN2_HUMAN	100Step_Domain_p800.0_to_900.0	800	900	100.0 AA STEP	100	0	0	0	0	0	0	0	1	0	0			0	0	0	0	0	0
FBLN2	Fibulin-2	FBLN2_HUMAN	100Step_Domain_p900.0_to_1000.0	900	1000	100.0 AA STEP	100	0	0	0	0	0	0	0	1	0	0			0	0	0	0	0	0
FBLN2	Fibulin-2	FBLN2_HUMAN	100Step_Domain_p1000.0_to_1100.0	1000	1100	100.0 AA STEP	100	0	0	0	0	0	0	0	1	0	0			0	0	0	0	0	0
FBLN2	Fibulin-2	FBLN2_HUMAN	100Step_Domain_p1100.0_to_1184.0	1100	1184	100.0 AA STEP	84	4	4	0	0	4	0	0.0238095	0.216	3	1	DFALDVEMK IGPAPAFTGDTIALNIIK DFALDVEMK IGPAPAFTGDTIALNIIK	DFALDVEMK IGPAPAFTGDTIALNIIK QGSVTTFLAK	4	6	0	0	8	0
CSPG2	Chondroitin sulfate proteoglycan 2 (Versican); isoform CRA_b	A0A024RAQ9_HUMAN	Disordered	420	439	REGIONS	19	0	0	0	0	0	0	0	1	0	0			0	0	0	0	0	0
CSPG2	Chondroitin sulfate proteoglycan 2 (Versican); isoform CRA_b	A0A024RAQ9_HUMAN	Disordered_603_622	603	622	REGIONS	19	0	0	0	0	0	0	0	1	0	0			0	0	0	0	0	0
CSPG2	Chondroitin sulfate proteoglycan 2 (Versican); isoform CRA_b	A0A024RAQ9_HUMAN	Disordered_807_829	807	829	REGIONS	22	0	0	0	0	0	0	0	1	0	0			0	0	0	0	0	0
CSPG2	Chondroitin sulfate proteoglycan 2 (Versican); isoform CRA_b	A0A024RAQ9_HUMAN	Disordered_1126_1154	1126	1154	REGIONS	28	0	0	0	0	0	0	0	1	0	0			0	0	0	0	0	0
CSPG2	Chondroitin sulfate proteoglycan 2 (Versican); isoform CRA_b	A0A024RAQ9_HUMAN	Disordered_1277_1316	1277	1316	REGIONS	39	0	0	0	0	0	0	0	1	0	0			0	0	0	0	0	0
CSPG2	Chondroitin sulfate proteoglycan 2 (Versican); isoform CRA_b	A0A024RAQ9_HUMAN	Disordered_1420_1497	1420	1497	REGIONS	77	0	0	0	0	0	0	0	1	0	0			0	0	0	0	0	0
CSPG2	Chondroitin sulfate proteoglycan 2 (Versican); isoform CRA_b	A0A024RAQ9_HUMAN	Disordered_1510_1539	1510	1539	REGIONS	29	0	0	0	0	0	0	0	1	0	0			0	0	0	0	0	0
CSPG2	Chondroitin sulfate proteoglycan 2 (Versican); isoform CRA_b	A0A024RAQ9_HUMAN	Disordered_1717_1737	1717	1737	REGIONS	20	0	0	0	0	0	0	0	1	0	0			0	0	0	0	0	0
CSPG2	Chondroitin sulfate proteoglycan 2 (Versican); isoform CRA_b	A0A024RAQ9_HUMAN	Disordered_1759_1789	1759	1789	REGIONS	30	0	0	0	0	0	0	0	1	0	0			0	0	0	0	0	0
CSPG2	Chondroitin sulfate proteoglycan 2 (Versican); isoform CRA_b	A0A024RAQ9_HUMAN	Disordered_1962_1994	1962	1994	REGIONS	32	0	0	0	0	0	0	0	1	0	0			0	0	0	0	0	0
CSPG2	Chondroitin sulfate proteoglycan 2 (Versican); isoform CRA_b	A0A024RAQ9_HUMAN	Disordered_2107_2134	2107	2134	REGIONS	27	8	22	17	29	21	22	-0.296296	0	16	24	QEIESETTSEEQIQEEK QEVNPVRQEIESETTSEEQIQEEK QEIESETTSEEQIQEEK QEVNPVRQEIESETTSEEQIQEEK QEIESETTSEEQIQEEK QEVNPVRQEIESETTSEEQIQEEK	QEIESETTSEEQIQEEK QEVNPVRQEIESETTSEEQIQEEK QEIESETTSEEQIQEEK QEVNPVRQEIESETTSEEQIQEEK QEIESETTSEEQIQEEK QEVNPVRQEIESETTSEEQIQEEK	4	12	10	32	32	24
CSPG2	Chondroitin sulfate proteoglycan 2 (Versican); isoform CRA_b	A0A024RAQ9_HUMAN	Disordered_2168_2188	2168	2188	REGIONS	20	0	0	0	0	0	0	0	1	0	0			0	0	0	0	0	0
CSPG2	Chondroitin sulfate proteoglycan 2 (Versican); isoform CRA_b	A0A024RAQ9_HUMAN	Disordered_2371_2396	2371	2396	REGIONS	25	0	0	0	0	0	0	0	1	0	0			0	0	0	0	0	0
CSPG2	Chondroitin sulfate proteoglycan 2 (Versican); isoform CRA_b	A0A024RAQ9_HUMAN	Disordered_2445_2473	2445	2473	REGIONS	28	0	0	0	0	0	0	0	1	0	0			0	0	0	0	0	0
CSPG2	Chondroitin sulfate proteoglycan 2 (Versican); isoform CRA_b	A0A024RAQ9_HUMAN	Disordered_2493_2518	2493	2518	REGIONS	25	0	0	0	0	0	0	0	1	0	0			0	0	0	0	0	0
CSPG2	Chondroitin sulfate proteoglycan 2 (Versican); isoform CRA_b	A0A024RAQ9_HUMAN	Disordered_2598_2617	2598	2617	REGIONS	19	0	0	0	0	0	0	0	1	0	0			0	0	0	0	0	0
CSPG2	Chondroitin sulfate proteoglycan 2 (Versican); isoform CRA_b	A0A024RAQ9_HUMAN	Disordered_2834_2856	2834	2856	REGIONS	22	0	0	0	0	0	0	0	1	0	0			0	0	0	0	0	0
CSPG2	Chondroitin sulfate proteoglycan 2 (Versican); isoform CRA_b	A0A024RAQ9_HUMAN	Disordered_2881_2905	2881	2905	REGIONS	24	0	0	0	0	0	0	0	1	0	0			0	0	0	0	0	0
CSPG2	Chondroitin sulfate proteoglycan 2 (Versican); isoform CRA_b	A0A024RAQ9_HUMAN	Disordered_3371_3396	3371	3396	REGIONS	25	0	0	0	0	0	0	0	1	0	0			0	0	0	0	0	0
CSPG2	Chondroitin sulfate proteoglycan 2 (Versican); isoform CRA_b	A0A024RAQ9_HUMAN	Ig-like	34	146	DOMAINS	112	125	93	172	114	96	172	0.0267857	1	130	127	CDVMYGIEDTQDTVSLTVDGVVFHYR LLASDAGLYR VSVPTHPEAVGDASLTVVK CDVMYGIEDTQDTVSLTVDGVVFHYR LLASDAGLYR VSVPTHPEAVGDASLTVVK CDVMYGIEDTQDTVSLTVDGVVFHYR LLASDAGLYR VSVPTHPEAVGDASLTVVK	CDVMYGIEDTQDTVSLTVDGVVFHYR LLASDAGLYR VSVPTHPEAVGDASLTVVK CDVMYGIEDTQDTVSLTVDGVVFHYR LLASDAGLYR VSVPTHPEAVGDASLTVVK CDVMYGIEDTQDTVSLTVDGVVFHYR LLASDAGLYR VSVPTHPEAVGDASLTVVK	60	52	100	124	146	192
CSPG2	Chondroitin sulfate proteoglycan 2 (Versican); isoform CRA_b	A0A024RAQ9_HUMAN	Link	150	245	DOMAINS	95	71	82	100	40	55	59	0.347368	0.5726	84	51	CDVMYGIEDTQDTVSLTVDGVVFHYR SPQETYDVYCYVDHLDGDVFHLTVPSK YTLNFEAAQK AATSRYTLNFEAAQK CDVMYGIEDTQDTVSLTVDGVVFHYR SPQETYDVYCYVDHLDGDVFHLTVPSK YTLNFEAAQK CDVMYGIEDTQDTVSLTVDGVVFHYR SPQETYDVYCYVDHLDGDVFHLTVPSK YTLNFEAAQK	CDVMYGIEDTQDTVSLTVDGVVFHYR YTLNFEAAQK AATSRYTLNFEAAQK CDVMYGIEDTQDTVSLTVDGVVFHYR YTLNFEAAQK CDVMYGIEDTQDTVSLTVDGVVFHYR SPQETYDVYCYVDHLDGDVFHLTVPSK YTLNFEAAQK	34	46	58	44	84	66
CSPG2	Chondroitin sulfate proteoglycan 2 (Versican); isoform CRA_b	A0A024RAQ9_HUMAN	Link_251_347	251	347	DOMAINS	96	167	154	148	170	179	95	0.0833333	1	156	148	AQCGGGLLGVR FTFEEAAK FTFEEAAKECENQDAR LATVGELQAAWR NGFDQCDYGWLSDASVR SPQETYDVYCYVDHLDGDVFHLTVPSK FTFEEAAK FTFEEAAKECENQDAR LATVGELQAAWR LATVGELQAAWRNGFDQCDYGWLSDASVR NGFDQCDYGWLSDASVR SPQETYDVYCYVDHLDGDVFHLTVPSK FTFEEAAK FTFEEAAKECENQDAR LATVGELQAAWR NGFDQCDYGWLSDASVR SPQETYDVYCYVDHLDGDVFHLTVPSK	AQCGGGLLGVR FENQTGFPPPDSR FTFEEAAK FTFEEAAKECENQDAR LATVGELQAAWR NGFDQCDYGWLSDASVR AQCGGGLLGVR FTFEEAAK FTFEEAAKECENQDAR LATVGELQAAWR NGFDQCDYGWLSDASVR AQCGGGLLGVR FTFEEAAK LATVGELQAAWR NGFDQCDYGWLSDASVR SPQETYDVYCYVDHLDGDVFHLTVPSK	80	86	86	186	272	106
CSPG2	Chondroitin sulfate proteoglycan 2 (Versican); isoform CRA_b	A0A024RAQ9_HUMAN	EGF-like	3089	3125	DOMAINS	36	0	0	0	0	0	0	0	1	0	0			0	0	0	0	0	0
CSPG2	Chondroitin sulfate proteoglycan 2 (Versican); isoform CRA_b	A0A024RAQ9_HUMAN	EGF-like_3127_3163	3127	3163	DOMAINS	36	0	0	0	0	1	4	-0.0555556	1	0	2		NGATCVDGFNTFR NGATCVDGFNTFR	0	0	0	0	2	4
CSPG2	Chondroitin sulfate proteoglycan 2 (Versican); isoform CRA_b	A0A024RAQ9_HUMAN	C-type lectin	3176	3290	DOMAINS	114	38	50	21	20	71	9	0.0263158	1	36	33	LQGAHLTSILSHEEQMFVNR VGHDYQWIGLNDK LQGAHLTSILSHEEQMFVNR VGHDYQWIGLNDK VGHDYQWIGLNDK	LQGAHLTSILSHEEQMFVNR VGHDYQWIGLNDK LQGAHLTSILSHEEQMFVNR VGHDYQWIGLNDK VGHDYQWIGLNDK	18	28	12	22	108	10
CSPG2	Chondroitin sulfate proteoglycan 2 (Versican); isoform CRA_b	A0A024RAQ9_HUMAN	Sushi	3294	3354	DOMAINS	60	8	11	14	9	4	5	0.0833333	1	11	6	YEINSLIR YEINSLIR GTVACGQPPVVENAK YEINSLIR	YEINSLIR YEINSLIR YEINSLIR	4	6	8	10	6	6
CSPG2	Chondroitin sulfate proteoglycan 2 (Versican); isoform CRA_b	A0A024RAQ9_HUMAN	50Step_Domain_p0_to_50	0	50	50.0 AA STEP	50	0	0	0	0	0	0	0	1	0	0			0	0	0	0	0	0
CSPG2	Chondroitin sulfate proteoglycan 2 (Versican); isoform CRA_b	A0A024RAQ9_HUMAN	50Step_Domain_p50.0_to_100.0	50	100	50.0 AA STEP	50	0	0	0	0	0	0	0	1	0	0			0	0	0	0	0	0
CSPG2	Chondroitin sulfate proteoglycan 2 (Versican); isoform CRA_b	A0A024RAQ9_HUMAN	50Step_Domain_p100.0_to_150.0	100	150	50.0 AA STEP	50	125	93	172	114	96	172	0.06	1	130	127	CDVMYGIEDTQDTVSLTVDGVVFHYR LLASDAGLYR VSVPTHPEAVGDASLTVVK CDVMYGIEDTQDTVSLTVDGVVFHYR LLASDAGLYR VSVPTHPEAVGDASLTVVK CDVMYGIEDTQDTVSLTVDGVVFHYR LLASDAGLYR VSVPTHPEAVGDASLTVVK	CDVMYGIEDTQDTVSLTVDGVVFHYR LLASDAGLYR VSVPTHPEAVGDASLTVVK CDVMYGIEDTQDTVSLTVDGVVFHYR LLASDAGLYR VSVPTHPEAVGDASLTVVK CDVMYGIEDTQDTVSLTVDGVVFHYR LLASDAGLYR VSVPTHPEAVGDASLTVVK	60	52	100	124	146	192
CSPG2	Chondroitin sulfate proteoglycan 2 (Versican); isoform CRA_b	A0A024RAQ9_HUMAN	50Step_Domain_p150.0_to_200.0	150	200	50.0 AA STEP	50	50	68	82	40	55	54	0.34	1	67	50	CDVMYGIEDTQDTVSLTVDGVVFHYR YTLNFEAAQK AATSRYTLNFEAAQK CDVMYGIEDTQDTVSLTVDGVVFHYR YTLNFEAAQK CDVMYGIEDTQDTVSLTVDGVVFHYR YTLNFEAAQK	CDVMYGIEDTQDTVSLTVDGVVFHYR YTLNFEAAQK AATSRYTLNFEAAQK CDVMYGIEDTQDTVSLTVDGVVFHYR YTLNFEAAQK CDVMYGIEDTQDTVSLTVDGVVFHYR YTLNFEAAQK	24	38	48	44	84	60
CSPG2	Chondroitin sulfate proteoglycan 2 (Versican); isoform CRA_b	A0A024RAQ9_HUMAN	50Step_Domain_p200.0_to_250.0	200	250	50.0 AA STEP	50	21	14	17	0	0	5	0.3	1	17	2	SPQETYDVYCYVDHLDGDVFHLTVPSK SPQETYDVYCYVDHLDGDVFHLTVPSK SPQETYDVYCYVDHLDGDVFHLTVPSK	SPQETYDVYCYVDHLDGDVFHLTVPSK	10	8	10	0	0	6
CSPG2	Chondroitin sulfate proteoglycan 2 (Versican); isoform CRA_b	A0A024RAQ9_HUMAN	50Step_Domain_p250.0_to_300.0	250	300	50.0 AA STEP	50	163	154	148	163	178	93	0.2	1	155	145	FTFEEAAK FTFEEAAKECENQDAR LATVGELQAAWR NGFDQCDYGWLSDASVR SPQETYDVYCYVDHLDGDVFHLTVPSK FTFEEAAK FTFEEAAKECENQDAR LATVGELQAAWR LATVGELQAAWRNGFDQCDYGWLSDASVR NGFDQCDYGWLSDASVR SPQETYDVYCYVDHLDGDVFHLTVPSK FTFEEAAK FTFEEAAKECENQDAR LATVGELQAAWR NGFDQCDYGWLSDASVR SPQETYDVYCYVDHLDGDVFHLTVPSK	FTFEEAAK FTFEEAAKECENQDAR LATVGELQAAWR NGFDQCDYGWLSDASVR FTFEEAAK FTFEEAAKECENQDAR LATVGELQAAWR NGFDQCDYGWLSDASVR FTFEEAAK LATVGELQAAWR NGFDQCDYGWLSDASVR SPQETYDVYCYVDHLDGDVFHLTVPSK	78	86	86	178	270	104
CSPG2	Chondroitin sulfate proteoglycan 2 (Versican); isoform CRA_b	A0A024RAQ9_HUMAN	50Step_Domain_p300.0_to_350.0	300	350	50.0 AA STEP	50	83	61	58	94	91	34	-0.12	1	67	73	AQCGGGLLGVR NGFDQCDYGWLSDASVR LATVGELQAAWRNGFDQCDYGWLSDASVR NGFDQCDYGWLSDASVR NGFDQCDYGWLSDASVR	AQCGGGLLGVR FENQTGFPPPDSR NGFDQCDYGWLSDASVR AQCGGGLLGVR NGFDQCDYGWLSDASVR AQCGGGLLGVR NGFDQCDYGWLSDASVR	40	34	34	102	138	38
CSPG2	Chondroitin sulfate proteoglycan 2 (Versican); isoform CRA_b	A0A024RAQ9_HUMAN	50Step_Domain_p350.0_to_400.0	350	400	50.0 AA STEP	50	0	0	0	0	0	0	0	1	0	0			0	0	0	0	0	0
CSPG2	Chondroitin sulfate proteoglycan 2 (Versican); isoform CRA_b	A0A024RAQ9_HUMAN	50Step_Domain_p400.0_to_450.0	400	450	50.0 AA STEP	50	0	0	0	0	0	0	0	1	0	0			0	0	0	0	0	0
CSPG2	Chondroitin sulfate proteoglycan 2 (Versican); isoform CRA_b	A0A024RAQ9_HUMAN	50Step_Domain_p450.0_to_500.0	450	500	50.0 AA STEP	50	0	0	0	0	0	0	0	1	0	0			0	0	0	0	0	0
CSPG2	Chondroitin sulfate proteoglycan 2 (Versican); isoform CRA_b	A0A024RAQ9_HUMAN	50Step_Domain_p500.0_to_550.0	500	550	50.0 AA STEP	50	0	0	0	0	0	0	0	1	0	0			0	0	0	0	0	0
CSPG2	Chondroitin sulfate proteoglycan 2 (Versican); isoform CRA_b	A0A024RAQ9_HUMAN	50Step_Domain_p550.0_to_600.0	550	600	50.0 AA STEP	50	0	0	0	0	0	0	0	1	0	0			0	0	0	0	0	0
CSPG2	Chondroitin sulfate proteoglycan 2 (Versican); isoform CRA_b	A0A024RAQ9_HUMAN	50Step_Domain_p600.0_to_650.0	600	650	50.0 AA STEP	50	4	7	10	7	5	9	0	1	7	7	ITEEFLGK ITEEFLGK ITEEFLGK	ITEEFLGK ITEEFLGK ITEEFLGK	2	4	6	8	8	10
CSPG2	Chondroitin sulfate proteoglycan 2 (Versican); isoform CRA_b	A0A024RAQ9_HUMAN	50Step_Domain_p650.0_to_700.0	650	700	50.0 AA STEP	50	0	0	0	0	0	0	0	1	0	0			0	0	0	0	0	0
CSPG2	Chondroitin sulfate proteoglycan 2 (Versican); isoform CRA_b	A0A024RAQ9_HUMAN	50Step_Domain_p700.0_to_750.0	700	750	50.0 AA STEP	50	4	4	3	4	1	7	0	1	4	4	TEEEVFSGMK TEEEVFSGMK TEEEVFSGMK	TEEEVFSGMK TEEEVFSGMK TEEEVFSGMK	2	2	2	4	2	8
CSPG2	Chondroitin sulfate proteoglycan 2 (Versican); isoform CRA_b	A0A024RAQ9_HUMAN	50Step_Domain_p750.0_to_800.0	750	800	50.0 AA STEP	50	0	0	0	0	0	0	0	1	0	0			0	0	0	0	0	0
CSPG2	Chondroitin sulfate proteoglycan 2 (Versican); isoform CRA_b	A0A024RAQ9_HUMAN	50Step_Domain_p800.0_to_850.0	800	850	50.0 AA STEP	50	0	0	0	0	0	0	0	1	0	0			0	0	0	0	0	0
CSPG2	Chondroitin sulfate proteoglycan 2 (Versican); isoform CRA_b	A0A024RAQ9_HUMAN	50Step_Domain_p850.0_to_900.0	850	900	50.0 AA STEP	50	0	0	0	4	3	7	-0.1	1	0	5		QLEEVTDEDIAAHGK QLEEVTDEDIAAHGK QLEEVTDEDIAAHGK	0	0	0	4	4	8
CSPG2	Chondroitin sulfate proteoglycan 2 (Versican); isoform CRA_b	A0A024RAQ9_HUMAN	50Step_Domain_p900.0_to_950.0	900	950	50.0 AA STEP	50	0	0	0	0	0	0	0	1	0	0			0	0	0	0	0	0
CSPG2	Chondroitin sulfate proteoglycan 2 (Versican); isoform CRA_b	A0A024RAQ9_HUMAN	50Step_Domain_p950.0_to_1000.0	950	1000	50.0 AA STEP	50	0	0	0	0	0	0	0	1	0	0			0	0	0	0	0	0
CSPG2	Chondroitin sulfate proteoglycan 2 (Versican); isoform CRA_b	A0A024RAQ9_HUMAN	50Step_Domain_p1000.0_to_1050.0	1000	1050	50.0 AA STEP	50	0	0	0	0	0	2	-0.02	1	0	1		ITEGTTQEEFPWK	0	0	0	0	0	2
CSPG2	Chondroitin sulfate proteoglycan 2 (Versican); isoform CRA_b	A0A024RAQ9_HUMAN	50Step_Domain_p1050.0_to_1100.0	1050	1100	50.0 AA STEP	50	0	0	0	0	0	0	0	1	0	0			0	0	0	0	0	0
CSPG2	Chondroitin sulfate proteoglycan 2 (Versican); isoform CRA_b	A0A024RAQ9_HUMAN	50Step_Domain_p1100.0_to_1150.0	1100	1150	50.0 AA STEP	50	0	0	0	0	0	0	0	1	0	0			0	0	0	0	0	0
CSPG2	Chondroitin sulfate proteoglycan 2 (Versican); isoform CRA_b	A0A024RAQ9_HUMAN	50Step_Domain_p1150.0_to_1200.0	1150	1200	50.0 AA STEP	50	0	0	0	0	0	0	0	1	0	0			0	0	0	0	0	0
CSPG2	Chondroitin sulfate proteoglycan 2 (Versican); isoform CRA_b	A0A024RAQ9_HUMAN	50Step_Domain_p1200.0_to_1250.0	1200	1250	50.0 AA STEP	50	0	0	0	0	1	0	0	1	0	0		VTVPSDITTAFSSVDR	0	0	0	0	2	0
CSPG2	Chondroitin sulfate proteoglycan 2 (Versican); isoform CRA_b	A0A024RAQ9_HUMAN	50Step_Domain_p1250.0_to_1300.0	1250	1300	50.0 AA STEP	50	0	0	0	0	0	0	0	1	0	0			0	0	0	0	0	0
CSPG2	Chondroitin sulfate proteoglycan 2 (Versican); isoform CRA_b	A0A024RAQ9_HUMAN	50Step_Domain_p1300.0_to_1350.0	1300	1350	50.0 AA STEP	50	79	86	65	86	63	99	-0.12	1	77	83	MSDLSVIGHPIDSESK FHPDINVYIIEVR MSDLSVIGHPIDSESK MSDLSVIGHPIDSESK	MSDLSVIGHPIDSESK FHPDINVYIIEVR MSDLSVIGHPIDSESK MSDLSVIGHPIDSESK	38	48	38	94	96	110
CSPG2	Chondroitin sulfate proteoglycan 2 (Versican); isoform CRA_b	A0A024RAQ9_HUMAN	50Step_Domain_p1350.0_to_1400.0	1350	1400	50.0 AA STEP	50	79	72	65	86	59	99	-0.18	1	72	81	MSDLSVIGHPIDSESK MSDLSVIGHPIDSESK MSDLSVIGHPIDSESK	MSDLSVIGHPIDSESK MSDLSVIGHPIDSESK MSDLSVIGHPIDSESK	38	40	38	94	90	110
CSPG2	Chondroitin sulfate proteoglycan 2 (Versican); isoform CRA_b	A0A024RAQ9_HUMAN	50Step_Domain_p1400.0_to_1450.0	1400	1450	50.0 AA STEP	50	0	0	0	0	0	0	0	1	0	0			0	0	0	0	0	0
CSPG2	Chondroitin sulfate proteoglycan 2 (Versican); isoform CRA_b	A0A024RAQ9_HUMAN	50Step_Domain_p1450.0_to_1500.0	1450	1500	50.0 AA STEP	50	0	0	0	0	0	0	0	1	0	0			0	0	0	0	0	0
CSPG2	Chondroitin sulfate proteoglycan 2 (Versican); isoform CRA_b	A0A024RAQ9_HUMAN	50Step_Domain_p1500.0_to_1550.0	1500	1550	50.0 AA STEP	50	0	0	0	0	0	0	0	1	0	0			0	0	0	0	0	0
CSPG2	Chondroitin sulfate proteoglycan 2 (Versican); isoform CRA_b	A0A024RAQ9_HUMAN	50Step_Domain_p1550.0_to_1600.0	1550	1600	50.0 AA STEP	50	0	0	0	0	0	2	-0.02	1	0	1		ATEVTFGEEVEK	0	0	0	0	0	2
CSPG2	Chondroitin sulfate proteoglycan 2 (Versican); isoform CRA_b	A0A024RAQ9_HUMAN	50Step_Domain_p1600.0_to_1650.0	1600	1650	50.0 AA STEP	50	0	0	0	0	0	0	0	1	0	0			0	0	0	0	0	0
CSPG2	Chondroitin sulfate proteoglycan 2 (Versican); isoform CRA_b	A0A024RAQ9_HUMAN	50Step_Domain_p1650.0_to_1700.0	1650	1700	50.0 AA STEP	50	0	0	0	0	0	0	0	1	0	0			0	0	0	0	0	0
CSPG2	Chondroitin sulfate proteoglycan 2 (Versican); isoform CRA_b	A0A024RAQ9_HUMAN	50Step_Domain_p1700.0_to_1750.0	1700	1750	50.0 AA STEP	50	0	0	0	0	0	0	0	1	0	0			0	0	0	0	0	0
CSPG2	Chondroitin sulfate proteoglycan 2 (Versican); isoform CRA_b	A0A024RAQ9_HUMAN	50Step_Domain_p1750.0_to_1800.0	1750	1800	50.0 AA STEP	50	0	0	0	0	0	0	0	1	0	0			0	0	0	0	0	0
CSPG2	Chondroitin sulfate proteoglycan 2 (Versican); isoform CRA_b	A0A024RAQ9_HUMAN	50Step_Domain_p1800.0_to_1850.0	1800	1850	50.0 AA STEP	50	0	0	0	0	0	0	0	1	0	0			0	0	0	0	0	0
CSPG2	Chondroitin sulfate proteoglycan 2 (Versican); isoform CRA_b	A0A024RAQ9_HUMAN	50Step_Domain_p1850.0_to_1900.0	1850	1900	50.0 AA STEP	50	0	0	0	0	0	0	0	1	0	0			0	0	0	0	0	0
CSPG2	Chondroitin sulfate proteoglycan 2 (Versican); isoform CRA_b	A0A024RAQ9_HUMAN	50Step_Domain_p1900.0_to_1950.0	1900	1950	50.0 AA STEP	50	13	11	0	6	4	22	-0.06	1	8	11	LGEPNYGAEIR LGEPNYGAEIR	LGEPNYGAEIR LGEPNYGAEIR LGEPNYGAEIR	6	6	0	6	6	24
CSPG2	Chondroitin sulfate proteoglycan 2 (Versican); isoform CRA_b	A0A024RAQ9_HUMAN	50Step_Domain_p1950.0_to_2000.0	1950	2000	50.0 AA STEP	50	0	0	0	0	0	0	0	1	0	0			0	0	0	0	0	0
CSPG2	Chondroitin sulfate proteoglycan 2 (Versican); isoform CRA_b	A0A024RAQ9_HUMAN	50Step_Domain_p2000.0_to_2050.0	2000	2050	50.0 AA STEP	50	0	0	0	0	0	0	0	1	0	0			0	0	0	0	0	0
CSPG2	Chondroitin sulfate proteoglycan 2 (Versican); isoform CRA_b	A0A024RAQ9_HUMAN	50Step_Domain_p2050.0_to_2100.0	2050	2100	50.0 AA STEP	50	0	0	0	0	0	0	0	1	0	0			0	0	0	0	0	0
CSPG2	Chondroitin sulfate proteoglycan 2 (Versican); isoform CRA_b	A0A024RAQ9_HUMAN	50Step_Domain_p2100.0_to_2150.0	2100	2150	50.0 AA STEP	50	8	22	17	29	21	22	-0.16	1	16	24	QEIESETTSEEQIQEEK QEVNPVRQEIESETTSEEQIQEEK QEIESETTSEEQIQEEK QEVNPVRQEIESETTSEEQIQEEK QEIESETTSEEQIQEEK QEVNPVRQEIESETTSEEQIQEEK	QEIESETTSEEQIQEEK QEVNPVRQEIESETTSEEQIQEEK QEIESETTSEEQIQEEK QEVNPVRQEIESETTSEEQIQEEK QEIESETTSEEQIQEEK QEVNPVRQEIESETTSEEQIQEEK	4	12	10	32	32	24
CSPG2	Chondroitin sulfate proteoglycan 2 (Versican); isoform CRA_b	A0A024RAQ9_HUMAN	50Step_Domain_p2150.0_to_2200.0	2150	2200	50.0 AA STEP	50	0	0	0	0	0	0	0	1	0	0			0	0	0	0	0	0
CSPG2	Chondroitin sulfate proteoglycan 2 (Versican); isoform CRA_b	A0A024RAQ9_HUMAN	50Step_Domain_p2200.0_to_2250.0	2200	2250	50.0 AA STEP	50	0	0	0	0	0	0	0	1	0	0			0	0	0	0	0	0
CSPG2	Chondroitin sulfate proteoglycan 2 (Versican); isoform CRA_b	A0A024RAQ9_HUMAN	50Step_Domain_p2250.0_to_2300.0	2250	2300	50.0 AA STEP	50	0	0	0	0	0	0	0	1	0	0			0	0	0	0	0	0
CSPG2	Chondroitin sulfate proteoglycan 2 (Versican); isoform CRA_b	A0A024RAQ9_HUMAN	50Step_Domain_p2300.0_to_2350.0	2300	2350	50.0 AA STEP	50	0	0	0	0	0	0	0	1	0	0			0	0	0	0	0	0
CSPG2	Chondroitin sulfate proteoglycan 2 (Versican); isoform CRA_b	A0A024RAQ9_HUMAN	50Step_Domain_p2350.0_to_2400.0	2350	2400	50.0 AA STEP	50	0	0	0	0	0	0	0	1	0	0			0	0	0	0	0	0
CSPG2	Chondroitin sulfate proteoglycan 2 (Versican); isoform CRA_b	A0A024RAQ9_HUMAN	50Step_Domain_p2400.0_to_2450.0	2400	2450	50.0 AA STEP	50	0	0	0	0	0	0	0	1	0	0			0	0	0	0	0	0
CSPG2	Chondroitin sulfate proteoglycan 2 (Versican); isoform CRA_b	A0A024RAQ9_HUMAN	50Step_Domain_p2450.0_to_2500.0	2450	2500	50.0 AA STEP	50	0	0	0	0	0	0	0	1	0	0			0	0	0	0	0	0
CSPG2	Chondroitin sulfate proteoglycan 2 (Versican); isoform CRA_b	A0A024RAQ9_HUMAN	50Step_Domain_p2500.0_to_2550.0	2500	2550	50.0 AA STEP	50	0	0	0	0	0	0	0	1	0	0			0	0	0	0	0	0
CSPG2	Chondroitin sulfate proteoglycan 2 (Versican); isoform CRA_b	A0A024RAQ9_HUMAN	50Step_Domain_p2550.0_to_2600.0	2550	2600	50.0 AA STEP	50	0	0	0	0	0	0	0	1	0	0			0	0	0	0	0	0
CSPG2	Chondroitin sulfate proteoglycan 2 (Versican); isoform CRA_b	A0A024RAQ9_HUMAN	50Step_Domain_p2600.0_to_2650.0	2600	2650	50.0 AA STEP	50	0	0	0	0	0	0	0	1	0	0			0	0	0	0	0	0
CSPG2	Chondroitin sulfate proteoglycan 2 (Versican); isoform CRA_b	A0A024RAQ9_HUMAN	50Step_Domain_p2650.0_to_2700.0	2650	2700	50.0 AA STEP	50	0	0	0	0	0	0	0	1	0	0			0	0	0	0	0	0
CSPG2	Chondroitin sulfate proteoglycan 2 (Versican); isoform CRA_b	A0A024RAQ9_HUMAN	50Step_Domain_p2700.0_to_2750.0	2700	2750	50.0 AA STEP	50	0	0	0	0	0	0	0	1	0	0			0	0	0	0	0	0
CSPG2	Chondroitin sulfate proteoglycan 2 (Versican); isoform CRA_b	A0A024RAQ9_HUMAN	50Step_Domain_p2750.0_to_2800.0	2750	2800	50.0 AA STEP	50	0	0	0	0	0	0	0	1	0	0			0	0	0	0	0	0
CSPG2	Chondroitin sulfate proteoglycan 2 (Versican); isoform CRA_b	A0A024RAQ9_HUMAN	50Step_Domain_p2800.0_to_2850.0	2800	2850	50.0 AA STEP	50	0	0	0	0	0	0	0	1	0	0			0	0	0	0	0	0
CSPG2	Chondroitin sulfate proteoglycan 2 (Versican); isoform CRA_b	A0A024RAQ9_HUMAN	50Step_Domain_p2850.0_to_2900.0	2850	2900	50.0 AA STEP	50	0	0	0	0	0	0	0	1	0	0			0	0	0	0	0	0
CSPG2	Chondroitin sulfate proteoglycan 2 (Versican); isoform CRA_b	A0A024RAQ9_HUMAN	50Step_Domain_p2900.0_to_2950.0	2900	2950	50.0 AA STEP	50	0	0	0	0	0	0	0	1	0	0			0	0	0	0	0	0
CSPG2	Chondroitin sulfate proteoglycan 2 (Versican); isoform CRA_b	A0A024RAQ9_HUMAN	50Step_Domain_p2950.0_to_3000.0	2950	3000	50.0 AA STEP	50	0	0	0	0	0	0	0	1	0	0			0	0	0	0	0	0
CSPG2	Chondroitin sulfate proteoglycan 2 (Versican); isoform CRA_b	A0A024RAQ9_HUMAN	50Step_Domain_p3000.0_to_3050.0	3000	3050	50.0 AA STEP	50	0	0	0	4	0	0	-0.02	1	0	1		GQDSTIAASEQQVAAR	0	0	0	4	0	0
CSPG2	Chondroitin sulfate proteoglycan 2 (Versican); isoform CRA_b	A0A024RAQ9_HUMAN	50Step_Domain_p3050.0_to_3100.0	3050	3100	50.0 AA STEP	50	0	0	0	0	0	0	0	1	0	0			0	0	0	0	0	0
CSPG2	Chondroitin sulfate proteoglycan 2 (Versican); isoform CRA_b	A0A024RAQ9_HUMAN	50Step_Domain_p3100.0_to_3150.0	3100	3150	50.0 AA STEP	50	0	0	0	0	1	4	-0.04	1	0	2		NGATCVDGFNTFR NGATCVDGFNTFR	0	0	0	0	2	4
CSPG2	Chondroitin sulfate proteoglycan 2 (Versican); isoform CRA_b	A0A024RAQ9_HUMAN	50Step_Domain_p3150.0_to_3200.0	3150	3200	50.0 AA STEP	50	25	47	0	18	59	0	-0.04	1	24	26	LQGAHLTSILSHEEQMFVNR LQGAHLTSILSHEEQMFVNR	LQGAHLTSILSHEEQMFVNR LQGAHLTSILSHEEQMFVNR	12	26	0	20	90	0
CSPG2	Chondroitin sulfate proteoglycan 2 (Versican); isoform CRA_b	A0A024RAQ9_HUMAN	50Step_Domain_p3200.0_to_3250.0	3200	3250	50.0 AA STEP	50	38	50	21	20	71	9	0.06	1	36	33	LQGAHLTSILSHEEQMFVNR VGHDYQWIGLNDK LQGAHLTSILSHEEQMFVNR VGHDYQWIGLNDK VGHDYQWIGLNDK	LQGAHLTSILSHEEQMFVNR VGHDYQWIGLNDK LQGAHLTSILSHEEQMFVNR VGHDYQWIGLNDK VGHDYQWIGLNDK	18	28	12	22	108	10
CSPG2	Chondroitin sulfate proteoglycan 2 (Versican); isoform CRA_b	A0A024RAQ9_HUMAN	50Step_Domain_p3250.0_to_3300.0	3250	3300	50.0 AA STEP	50	0	0	7	0	0	0	0.04	1	2	0	GTVACGQPPVVENAK		0	0	4	0	0	0
CSPG2	Chondroitin sulfate proteoglycan 2 (Versican); isoform CRA_b	A0A024RAQ9_HUMAN	50Step_Domain_p3300.0_to_3350.0	3300	3350	50.0 AA STEP	50	8	11	14	9	4	5	0.1	1	11	6	YEINSLIR YEINSLIR GTVACGQPPVVENAK YEINSLIR	YEINSLIR YEINSLIR YEINSLIR	4	6	8	10	6	6
CSPG2	Chondroitin sulfate proteoglycan 2 (Versican); isoform CRA_b	A0A024RAQ9_HUMAN	50Step_Domain_p3350.0_to_3396.0	3350	3396	50.0 AA STEP	46	0	0	0	0	0	0	0	1	0	0			0	0	0	0	0	0
CSPG2	Chondroitin sulfate proteoglycan 2 (Versican); isoform CRA_b	A0A024RAQ9_HUMAN	80Step_Domain_p0_to_80	0	80	80.0 AA STEP	80	0	0	0	0	0	0	0	1	0	0			0	0	0	0	0	0
CSPG2	Chondroitin sulfate proteoglycan 2 (Versican); isoform CRA_b	A0A024RAQ9_HUMAN	80Step_Domain_p80.0_to_160.0	80	160	80.0 AA STEP	80	125	97	172	114	103	172	0.0125	1	131	130	CDVMYGIEDTQDTVSLTVDGVVFHYR LLASDAGLYR VSVPTHPEAVGDASLTVVK AATSRYTLNFEAAQK CDVMYGIEDTQDTVSLTVDGVVFHYR LLASDAGLYR VSVPTHPEAVGDASLTVVK CDVMYGIEDTQDTVSLTVDGVVFHYR LLASDAGLYR VSVPTHPEAVGDASLTVVK	CDVMYGIEDTQDTVSLTVDGVVFHYR LLASDAGLYR VSVPTHPEAVGDASLTVVK AATSRYTLNFEAAQK CDVMYGIEDTQDTVSLTVDGVVFHYR LLASDAGLYR VSVPTHPEAVGDASLTVVK CDVMYGIEDTQDTVSLTVDGVVFHYR LLASDAGLYR VSVPTHPEAVGDASLTVVK	60	54	100	124	156	192
CSPG2	Chondroitin sulfate proteoglycan 2 (Versican); isoform CRA_b	A0A024RAQ9_HUMAN	80Step_Domain_p160.0_to_240.0	160	240	80.0 AA STEP	80	58	61	51	31	34	36	0.2875	0.2322	57	34	SPQETYDVYCYVDHLDGDVFHLTVPSK YTLNFEAAQK AATSRYTLNFEAAQK SPQETYDVYCYVDHLDGDVFHLTVPSK YTLNFEAAQK SPQETYDVYCYVDHLDGDVFHLTVPSK YTLNFEAAQK	YTLNFEAAQK AATSRYTLNFEAAQK YTLNFEAAQK SPQETYDVYCYVDHLDGDVFHLTVPSK YTLNFEAAQK	28	34	30	34	52	40
CSPG2	Chondroitin sulfate proteoglycan 2 (Versican); isoform CRA_b	A0A024RAQ9_HUMAN	80Step_Domain_p240.0_to_320.0	240	320	80.0 AA STEP	80	167	154	148	167	179	95	0.1125	1	156	147	AQCGGGLLGVR FTFEEAAK FTFEEAAKECENQDAR LATVGELQAAWR NGFDQCDYGWLSDASVR SPQETYDVYCYVDHLDGDVFHLTVPSK FTFEEAAK FTFEEAAKECENQDAR LATVGELQAAWR LATVGELQAAWRNGFDQCDYGWLSDASVR NGFDQCDYGWLSDASVR SPQETYDVYCYVDHLDGDVFHLTVPSK FTFEEAAK FTFEEAAKECENQDAR LATVGELQAAWR NGFDQCDYGWLSDASVR SPQETYDVYCYVDHLDGDVFHLTVPSK	AQCGGGLLGVR FTFEEAAK FTFEEAAKECENQDAR LATVGELQAAWR NGFDQCDYGWLSDASVR AQCGGGLLGVR FTFEEAAK FTFEEAAKECENQDAR LATVGELQAAWR NGFDQCDYGWLSDASVR AQCGGGLLGVR FTFEEAAK LATVGELQAAWR NGFDQCDYGWLSDASVR SPQETYDVYCYVDHLDGDVFHLTVPSK	80	86	86	182	272	106
CSPG2	Chondroitin sulfate proteoglycan 2 (Versican); isoform CRA_b	A0A024RAQ9_HUMAN	80Step_Domain_p320.0_to_400.0	320	400	80.0 AA STEP	80	4	0	0	7	1	2	-0.025	1	1	3	AQCGGGLLGVR	AQCGGGLLGVR FENQTGFPPPDSR AQCGGGLLGVR AQCGGGLLGVR	2	0	0	8	2	2
CSPG2	Chondroitin sulfate proteoglycan 2 (Versican); isoform CRA_b	A0A024RAQ9_HUMAN	80Step_Domain_p400.0_to_480.0	400	480	80.0 AA STEP	80	0	0	0	0	0	0	0	1	0	0			0	0	0	0	0	0
CSPG2	Chondroitin sulfate proteoglycan 2 (Versican); isoform CRA_b	A0A024RAQ9_HUMAN	80Step_Domain_p480.0_to_560.0	480	560	80.0 AA STEP	80	0	0	0	0	0	0	0	1	0	0			0	0	0	0	0	0
CSPG2	Chondroitin sulfate proteoglycan 2 (Versican); isoform CRA_b	A0A024RAQ9_HUMAN	80Step_Domain_p560.0_to_640.0	560	640	80.0 AA STEP	80	4	7	10	7	5	9	0	1	7	7	ITEEFLGK ITEEFLGK ITEEFLGK	ITEEFLGK ITEEFLGK ITEEFLGK	2	4	6	8	8	10
CSPG2	Chondroitin sulfate proteoglycan 2 (Versican); isoform CRA_b	A0A024RAQ9_HUMAN	80Step_Domain_p640.0_to_720.0	640	720	80.0 AA STEP	80	4	4	3	4	1	7	0	1	4	4	TEEEVFSGMK TEEEVFSGMK TEEEVFSGMK	TEEEVFSGMK TEEEVFSGMK TEEEVFSGMK	2	2	2	4	2	8
CSPG2	Chondroitin sulfate proteoglycan 2 (Versican); isoform CRA_b	A0A024RAQ9_HUMAN	80Step_Domain_p720.0_to_800.0	720	800	80.0 AA STEP	80	4	4	3	4	1	7	0	1	4	4	TEEEVFSGMK TEEEVFSGMK TEEEVFSGMK	TEEEVFSGMK TEEEVFSGMK TEEEVFSGMK	2	2	2	4	2	8
CSPG2	Chondroitin sulfate proteoglycan 2 (Versican); isoform CRA_b	A0A024RAQ9_HUMAN	80Step_Domain_p800.0_to_880.0	800	880	80.0 AA STEP	80	0	0	0	4	3	7	-0.0625	1	0	5		QLEEVTDEDIAAHGK QLEEVTDEDIAAHGK QLEEVTDEDIAAHGK	0	0	0	4	4	8
CSPG2	Chondroitin sulfate proteoglycan 2 (Versican); isoform CRA_b	A0A024RAQ9_HUMAN	80Step_Domain_p880.0_to_960.0	880	960	80.0 AA STEP	80	0	0	0	0	0	0	0	1	0	0			0	0	0	0	0	0
CSPG2	Chondroitin sulfate proteoglycan 2 (Versican); isoform CRA_b	A0A024RAQ9_HUMAN	80Step_Domain_p960.0_to_1040.0	960	1040	80.0 AA STEP	80	0	0	0	0	0	2	-0.0125	1	0	1		ITEGTTQEEFPWK	0	0	0	0	0	2
CSPG2	Chondroitin sulfate proteoglycan 2 (Versican); isoform CRA_b	A0A024RAQ9_HUMAN	80Step_Domain_p1040.0_to_1120.0	1040	1120	80.0 AA STEP	80	0	0	0	0	0	0	0	1	0	0			0	0	0	0	0	0
CSPG2	Chondroitin sulfate proteoglycan 2 (Versican); isoform CRA_b	A0A024RAQ9_HUMAN	80Step_Domain_p1120.0_to_1200.0	1120	1200	80.0 AA STEP	80	0	0	0	0	0	0	0	1	0	0			0	0	0	0	0	0
CSPG2	Chondroitin sulfate proteoglycan 2 (Versican); isoform CRA_b	A0A024RAQ9_HUMAN	80Step_Domain_p1200.0_to_1280.0	1200	1280	80.0 AA STEP	80	0	0	0	0	1	0	0	1	0	0		VTVPSDITTAFSSVDR	0	0	0	0	2	0
CSPG2	Chondroitin sulfate proteoglycan 2 (Versican); isoform CRA_b	A0A024RAQ9_HUMAN	80Step_Domain_p1280.0_to_1360.0	1280	1360	80.0 AA STEP	80	79	86	65	86	63	99	-0.075	1	77	83	MSDLSVIGHPIDSESK FHPDINVYIIEVR MSDLSVIGHPIDSESK MSDLSVIGHPIDSESK	MSDLSVIGHPIDSESK FHPDINVYIIEVR MSDLSVIGHPIDSESK MSDLSVIGHPIDSESK	38	48	38	94	96	110
CSPG2	Chondroitin sulfate proteoglycan 2 (Versican); isoform CRA_b	A0A024RAQ9_HUMAN	80Step_Domain_p1360.0_to_1440.0	1360	1440	80.0 AA STEP	80	0	0	0	0	0	0	0	1	0	0			0	0	0	0	0	0
CSPG2	Chondroitin sulfate proteoglycan 2 (Versican); isoform CRA_b	A0A024RAQ9_HUMAN	80Step_Domain_p1440.0_to_1520.0	1440	1520	80.0 AA STEP	80	0	0	0	0	0	0	0	1	0	0			0	0	0	0	0	0
CSPG2	Chondroitin sulfate proteoglycan 2 (Versican); isoform CRA_b	A0A024RAQ9_HUMAN	80Step_Domain_p1520.0_to_1600.0	1520	1600	80.0 AA STEP	80	0	0	0	0	0	2	-0.0125	1	0	1		ATEVTFGEEVEK	0	0	0	0	0	2
CSPG2	Chondroitin sulfate proteoglycan 2 (Versican); isoform CRA_b	A0A024RAQ9_HUMAN	80Step_Domain_p1600.0_to_1680.0	1600	1680	80.0 AA STEP	80	0	0	0	0	0	0	0	1	0	0			0	0	0	0	0	0
CSPG2	Chondroitin sulfate proteoglycan 2 (Versican); isoform CRA_b	A0A024RAQ9_HUMAN	80Step_Domain_p1680.0_to_1760.0	1680	1760	80.0 AA STEP	80	0	0	0	0	0	0	0	1	0	0			0	0	0	0	0	0
CSPG2	Chondroitin sulfate proteoglycan 2 (Versican); isoform CRA_b	A0A024RAQ9_HUMAN	80Step_Domain_p1760.0_to_1840.0	1760	1840	80.0 AA STEP	80	0	0	0	0	0	0	0	1	0	0			0	0	0	0	0	0
CSPG2	Chondroitin sulfate proteoglycan 2 (Versican); isoform CRA_b	A0A024RAQ9_HUMAN	80Step_Domain_p1840.0_to_1920.0	1840	1920	80.0 AA STEP	80	13	11	0	6	4	22	-0.0375	1	8	11	LGEPNYGAEIR LGEPNYGAEIR	LGEPNYGAEIR LGEPNYGAEIR LGEPNYGAEIR	6	6	0	6	6	24
CSPG2	Chondroitin sulfate proteoglycan 2 (Versican); isoform CRA_b	A0A024RAQ9_HUMAN	80Step_Domain_p1920.0_to_2000.0	1920	2000	80.0 AA STEP	80	13	11	0	6	4	22	-0.0375	1	8	11	LGEPNYGAEIR LGEPNYGAEIR	LGEPNYGAEIR LGEPNYGAEIR LGEPNYGAEIR	6	6	0	6	6	24
CSPG2	Chondroitin sulfate proteoglycan 2 (Versican); isoform CRA_b	A0A024RAQ9_HUMAN	80Step_Domain_p2000.0_to_2080.0	2000	2080	80.0 AA STEP	80	0	0	0	0	0	0	0	1	0	0			0	0	0	0	0	0
CSPG2	Chondroitin sulfate proteoglycan 2 (Versican); isoform CRA_b	A0A024RAQ9_HUMAN	80Step_Domain_p2080.0_to_2160.0	2080	2160	80.0 AA STEP	80	8	22	17	29	21	22	-0.1	1	16	24	QEIESETTSEEQIQEEK QEVNPVRQEIESETTSEEQIQEEK QEIESETTSEEQIQEEK QEVNPVRQEIESETTSEEQIQEEK QEIESETTSEEQIQEEK QEVNPVRQEIESETTSEEQIQEEK	QEIESETTSEEQIQEEK QEVNPVRQEIESETTSEEQIQEEK QEIESETTSEEQIQEEK QEVNPVRQEIESETTSEEQIQEEK QEIESETTSEEQIQEEK QEVNPVRQEIESETTSEEQIQEEK	4	12	10	32	32	24
CSPG2	Chondroitin sulfate proteoglycan 2 (Versican); isoform CRA_b	A0A024RAQ9_HUMAN	80Step_Domain_p2160.0_to_2240.0	2160	2240	80.0 AA STEP	80	0	0	0	0	0	0	0	1	0	0			0	0	0	0	0	0
CSPG2	Chondroitin sulfate proteoglycan 2 (Versican); isoform CRA_b	A0A024RAQ9_HUMAN	80Step_Domain_p2240.0_to_2320.0	2240	2320	80.0 AA STEP	80	0	0	0	0	0	0	0	1	0	0			0	0	0	0	0	0
CSPG2	Chondroitin sulfate proteoglycan 2 (Versican); isoform CRA_b	A0A024RAQ9_HUMAN	80Step_Domain_p2320.0_to_2400.0	2320	2400	80.0 AA STEP	80	0	0	0	0	0	0	0	1	0	0			0	0	0	0	0	0
CSPG2	Chondroitin sulfate proteoglycan 2 (Versican); isoform CRA_b	A0A024RAQ9_HUMAN	80Step_Domain_p2400.0_to_2480.0	2400	2480	80.0 AA STEP	80	0	0	0	0	0	0	0	1	0	0			0	0	0	0	0	0
CSPG2	Chondroitin sulfate proteoglycan 2 (Versican); isoform CRA_b	A0A024RAQ9_HUMAN	80Step_Domain_p2480.0_to_2560.0	2480	2560	80.0 AA STEP	80	0	0	0	0	0	0	0	1	0	0			0	0	0	0	0	0
CSPG2	Chondroitin sulfate proteoglycan 2 (Versican); isoform CRA_b	A0A024RAQ9_HUMAN	80Step_Domain_p2560.0_to_2640.0	2560	2640	80.0 AA STEP	80	0	0	0	0	0	0	0	1	0	0			0	0	0	0	0	0
CSPG2	Chondroitin sulfate proteoglycan 2 (Versican); isoform CRA_b	A0A024RAQ9_HUMAN	80Step_Domain_p2640.0_to_2720.0	2640	2720	80.0 AA STEP	80	0	0	0	0	0	0	0	1	0	0			0	0	0	0	0	0
CSPG2	Chondroitin sulfate proteoglycan 2 (Versican); isoform CRA_b	A0A024RAQ9_HUMAN	80Step_Domain_p2720.0_to_2800.0	2720	2800	80.0 AA STEP	80	0	0	0	0	0	0	0	1	0	0			0	0	0	0	0	0
CSPG2	Chondroitin sulfate proteoglycan 2 (Versican); isoform CRA_b	A0A024RAQ9_HUMAN	80Step_Domain_p2800.0_to_2880.0	2800	2880	80.0 AA STEP	80	0	0	0	0	0	0	0	1	0	0			0	0	0	0	0	0
CSPG2	Chondroitin sulfate proteoglycan 2 (Versican); isoform CRA_b	A0A024RAQ9_HUMAN	80Step_Domain_p2880.0_to_2960.0	2880	2960	80.0 AA STEP	80	0	0	0	0	0	0	0	1	0	0			0	0	0	0	0	0
CSPG2	Chondroitin sulfate proteoglycan 2 (Versican); isoform CRA_b	A0A024RAQ9_HUMAN	80Step_Domain_p2960.0_to_3040.0	2960	3040	80.0 AA STEP	80	0	0	0	4	0	0	-0.0125	1	0	1		GQDSTIAASEQQVAAR	0	0	0	4	0	0
CSPG2	Chondroitin sulfate proteoglycan 2 (Versican); isoform CRA_b	A0A024RAQ9_HUMAN	80Step_Domain_p3040.0_to_3120.0	3040	3120	80.0 AA STEP	80	0	0	0	0	0	0	0	1	0	0			0	0	0	0	0	0
CSPG2	Chondroitin sulfate proteoglycan 2 (Versican); isoform CRA_b	A0A024RAQ9_HUMAN	80Step_Domain_p3120.0_to_3200.0	3120	3200	80.0 AA STEP	80	25	47	0	18	60	4	-0.0375	1	24	27	LQGAHLTSILSHEEQMFVNR LQGAHLTSILSHEEQMFVNR	LQGAHLTSILSHEEQMFVNR LQGAHLTSILSHEEQMFVNR NGATCVDGFNTFR NGATCVDGFNTFR	12	26	0	20	92	4
CSPG2	Chondroitin sulfate proteoglycan 2 (Versican); isoform CRA_b	A0A024RAQ9_HUMAN	80Step_Domain_p3200.0_to_3280.0	3200	3280	80.0 AA STEP	80	38	50	21	20	71	9	0.0375	1	36	33	LQGAHLTSILSHEEQMFVNR VGHDYQWIGLNDK LQGAHLTSILSHEEQMFVNR VGHDYQWIGLNDK VGHDYQWIGLNDK	LQGAHLTSILSHEEQMFVNR VGHDYQWIGLNDK LQGAHLTSILSHEEQMFVNR VGHDYQWIGLNDK VGHDYQWIGLNDK	18	28	12	22	108	10
CSPG2	Chondroitin sulfate proteoglycan 2 (Versican); isoform CRA_b	A0A024RAQ9_HUMAN	80Step_Domain_p3280.0_to_3360.0	3280	3360	80.0 AA STEP	80	8	11	14	9	4	5	0.0625	1	11	6	YEINSLIR YEINSLIR GTVACGQPPVVENAK YEINSLIR	YEINSLIR YEINSLIR YEINSLIR	4	6	8	10	6	6
CSPG2	Chondroitin sulfate proteoglycan 2 (Versican); isoform CRA_b	A0A024RAQ9_HUMAN	80Step_Domain_p3360.0_to_3396.0	3360	3396	80.0 AA STEP	36	0	0	0	0	0	0	0	1	0	0			0	0	0	0	0	0
CSPG2	Chondroitin sulfate proteoglycan 2 (Versican); isoform CRA_b	A0A024RAQ9_HUMAN	100Step_Domain_p0_to_100	0	100	100.0 AA STEP	100	0	0	0	0	0	0	0	1	0	0			0	0	0	0	0	0
CSPG2	Chondroitin sulfate proteoglycan 2 (Versican); isoform CRA_b	A0A024RAQ9_HUMAN	100Step_Domain_p100.0_to_200.0	100	200	100.0 AA STEP	100	163	140	206	145	130	203	0.11	1	170	159	CDVMYGIEDTQDTVSLTVDGVVFHYR LLASDAGLYR VSVPTHPEAVGDASLTVVK YTLNFEAAQK AATSRYTLNFEAAQK CDVMYGIEDTQDTVSLTVDGVVFHYR LLASDAGLYR VSVPTHPEAVGDASLTVVK YTLNFEAAQK CDVMYGIEDTQDTVSLTVDGVVFHYR LLASDAGLYR VSVPTHPEAVGDASLTVVK YTLNFEAAQK	CDVMYGIEDTQDTVSLTVDGVVFHYR LLASDAGLYR VSVPTHPEAVGDASLTVVK YTLNFEAAQK AATSRYTLNFEAAQK CDVMYGIEDTQDTVSLTVDGVVFHYR LLASDAGLYR VSVPTHPEAVGDASLTVVK YTLNFEAAQK CDVMYGIEDTQDTVSLTVDGVVFHYR LLASDAGLYR VSVPTHPEAVGDASLTVVK YTLNFEAAQK	78	78	120	158	198	226
CSPG2	Chondroitin sulfate proteoglycan 2 (Versican); isoform CRA_b	A0A024RAQ9_HUMAN	100Step_Domain_p200.0_to_300.0	200	300	100.0 AA STEP	100	163	154	148	163	178	93	0.1	1	155	145	FTFEEAAK FTFEEAAKECENQDAR LATVGELQAAWR NGFDQCDYGWLSDASVR SPQETYDVYCYVDHLDGDVFHLTVPSK FTFEEAAK FTFEEAAKECENQDAR LATVGELQAAWR LATVGELQAAWRNGFDQCDYGWLSDASVR NGFDQCDYGWLSDASVR SPQETYDVYCYVDHLDGDVFHLTVPSK FTFEEAAK FTFEEAAKECENQDAR LATVGELQAAWR NGFDQCDYGWLSDASVR SPQETYDVYCYVDHLDGDVFHLTVPSK	FTFEEAAK FTFEEAAKECENQDAR LATVGELQAAWR NGFDQCDYGWLSDASVR FTFEEAAK FTFEEAAKECENQDAR LATVGELQAAWR NGFDQCDYGWLSDASVR FTFEEAAK LATVGELQAAWR NGFDQCDYGWLSDASVR SPQETYDVYCYVDHLDGDVFHLTVPSK	78	86	86	178	270	104
CSPG2	Chondroitin sulfate proteoglycan 2 (Versican); isoform CRA_b	A0A024RAQ9_HUMAN	100Step_Domain_p300.0_to_400.0	300	400	100.0 AA STEP	100	83	61	58	94	91	34	-0.06	1	67	73	AQCGGGLLGVR NGFDQCDYGWLSDASVR LATVGELQAAWRNGFDQCDYGWLSDASVR NGFDQCDYGWLSDASVR NGFDQCDYGWLSDASVR	AQCGGGLLGVR FENQTGFPPPDSR NGFDQCDYGWLSDASVR AQCGGGLLGVR NGFDQCDYGWLSDASVR AQCGGGLLGVR NGFDQCDYGWLSDASVR	40	34	34	102	138	38
CSPG2	Chondroitin sulfate proteoglycan 2 (Versican); isoform CRA_b	A0A024RAQ9_HUMAN	100Step_Domain_p400.0_to_500.0	400	500	100.0 AA STEP	100	0	0	0	0	0	0	0	1	0	0			0	0	0	0	0	0
CSPG2	Chondroitin sulfate proteoglycan 2 (Versican); isoform CRA_b	A0A024RAQ9_HUMAN	100Step_Domain_p500.0_to_600.0	500	600	100.0 AA STEP	100	0	0	0	0	0	0	0	1	0	0			0	0	0	0	0	0
CSPG2	Chondroitin sulfate proteoglycan 2 (Versican); isoform CRA_b	A0A024RAQ9_HUMAN	100Step_Domain_p600.0_to_700.0	600	700	100.0 AA STEP	100	4	7	10	7	5	9	0	1	7	7	ITEEFLGK ITEEFLGK ITEEFLGK	ITEEFLGK ITEEFLGK ITEEFLGK	2	4	6	8	8	10
CSPG2	Chondroitin sulfate proteoglycan 2 (Versican); isoform CRA_b	A0A024RAQ9_HUMAN	100Step_Domain_p700.0_to_800.0	700	800	100.0 AA STEP	100	4	4	3	4	1	7	0	1	4	4	TEEEVFSGMK TEEEVFSGMK TEEEVFSGMK	TEEEVFSGMK TEEEVFSGMK TEEEVFSGMK	2	2	2	4	2	8
CSPG2	Chondroitin sulfate proteoglycan 2 (Versican); isoform CRA_b	A0A024RAQ9_HUMAN	100Step_Domain_p800.0_to_900.0	800	900	100.0 AA STEP	100	0	0	0	4	3	7	-0.05	1	0	5		QLEEVTDEDIAAHGK QLEEVTDEDIAAHGK QLEEVTDEDIAAHGK	0	0	0	4	4	8
CSPG2	Chondroitin sulfate proteoglycan 2 (Versican); isoform CRA_b	A0A024RAQ9_HUMAN	100Step_Domain_p900.0_to_1000.0	900	1000	100.0 AA STEP	100	0	0	0	0	0	0	0	1	0	0			0	0	0	0	0	0
CSPG2	Chondroitin sulfate proteoglycan 2 (Versican); isoform CRA_b	A0A024RAQ9_HUMAN	100Step_Domain_p1000.0_to_1100.0	1000	1100	100.0 AA STEP	100	0	0	0	0	0	2	-0.01	1	0	1		ITEGTTQEEFPWK	0	0	0	0	0	2
CSPG2	Chondroitin sulfate proteoglycan 2 (Versican); isoform CRA_b	A0A024RAQ9_HUMAN	100Step_Domain_p1100.0_to_1200.0	1100	1200	100.0 AA STEP	100	0	0	0	0	0	0	0	1	0	0			0	0	0	0	0	0
CSPG2	Chondroitin sulfate proteoglycan 2 (Versican); isoform CRA_b	A0A024RAQ9_HUMAN	100Step_Domain_p1200.0_to_1300.0	1200	1300	100.0 AA STEP	100	0	0	0	0	1	0	0	1	0	0		VTVPSDITTAFSSVDR	0	0	0	0	2	0
CSPG2	Chondroitin sulfate proteoglycan 2 (Versican); isoform CRA_b	A0A024RAQ9_HUMAN	100Step_Domain_p1300.0_to_1400.0	1300	1400	100.0 AA STEP	100	79	86	65	86	63	99	-0.06	1	77	83	MSDLSVIGHPIDSESK FHPDINVYIIEVR MSDLSVIGHPIDSESK MSDLSVIGHPIDSESK	MSDLSVIGHPIDSESK FHPDINVYIIEVR MSDLSVIGHPIDSESK MSDLSVIGHPIDSESK	38	48	38	94	96	110
CSPG2	Chondroitin sulfate proteoglycan 2 (Versican); isoform CRA_b	A0A024RAQ9_HUMAN	100Step_Domain_p1400.0_to_1500.0	1400	1500	100.0 AA STEP	100	0	0	0	0	0	0	0	1	0	0			0	0	0	0	0	0
CSPG2	Chondroitin sulfate proteoglycan 2 (Versican); isoform CRA_b	A0A024RAQ9_HUMAN	100Step_Domain_p1500.0_to_1600.0	1500	1600	100.0 AA STEP	100	0	0	0	0	0	2	-0.01	1	0	1		ATEVTFGEEVEK	0	0	0	0	0	2
CSPG2	Chondroitin sulfate proteoglycan 2 (Versican); isoform CRA_b	A0A024RAQ9_HUMAN	100Step_Domain_p1600.0_to_1700.0	1600	1700	100.0 AA STEP	100	0	0	0	0	0	0	0	1	0	0			0	0	0	0	0	0
CSPG2	Chondroitin sulfate proteoglycan 2 (Versican); isoform CRA_b	A0A024RAQ9_HUMAN	100Step_Domain_p1700.0_to_1800.0	1700	1800	100.0 AA STEP	100	0	0	0	0	0	0	0	1	0	0			0	0	0	0	0	0
CSPG2	Chondroitin sulfate proteoglycan 2 (Versican); isoform CRA_b	A0A024RAQ9_HUMAN	100Step_Domain_p1800.0_to_1900.0	1800	1900	100.0 AA STEP	100	0	0	0	0	0	0	0	1	0	0			0	0	0	0	0	0
CSPG2	Chondroitin sulfate proteoglycan 2 (Versican); isoform CRA_b	A0A024RAQ9_HUMAN	100Step_Domain_p1900.0_to_2000.0	1900	2000	100.0 AA STEP	100	13	11	0	6	4	22	-0.03	1	8	11	LGEPNYGAEIR LGEPNYGAEIR	LGEPNYGAEIR LGEPNYGAEIR LGEPNYGAEIR	6	6	0	6	6	24
CSPG2	Chondroitin sulfate proteoglycan 2 (Versican); isoform CRA_b	A0A024RAQ9_HUMAN	100Step_Domain_p2000.0_to_2100.0	2000	2100	100.0 AA STEP	100	0	0	0	0	0	0	0	1	0	0			0	0	0	0	0	0
CSPG2	Chondroitin sulfate proteoglycan 2 (Versican); isoform CRA_b	A0A024RAQ9_HUMAN	100Step_Domain_p2100.0_to_2200.0	2100	2200	100.0 AA STEP	100	8	22	17	29	21	22	-0.08	1	16	24	QEIESETTSEEQIQEEK QEVNPVRQEIESETTSEEQIQEEK QEIESETTSEEQIQEEK QEVNPVRQEIESETTSEEQIQEEK QEIESETTSEEQIQEEK QEVNPVRQEIESETTSEEQIQEEK	QEIESETTSEEQIQEEK QEVNPVRQEIESETTSEEQIQEEK QEIESETTSEEQIQEEK QEVNPVRQEIESETTSEEQIQEEK QEIESETTSEEQIQEEK QEVNPVRQEIESETTSEEQIQEEK	4	12	10	32	32	24
CSPG2	Chondroitin sulfate proteoglycan 2 (Versican); isoform CRA_b	A0A024RAQ9_HUMAN	100Step_Domain_p2200.0_to_2300.0	2200	2300	100.0 AA STEP	100	0	0	0	0	0	0	0	1	0	0			0	0	0	0	0	0
CSPG2	Chondroitin sulfate proteoglycan 2 (Versican); isoform CRA_b	A0A024RAQ9_HUMAN	100Step_Domain_p2300.0_to_2400.0	2300	2400	100.0 AA STEP	100	0	0	0	0	0	0	0	1	0	0			0	0	0	0	0	0
CSPG2	Chondroitin sulfate proteoglycan 2 (Versican); isoform CRA_b	A0A024RAQ9_HUMAN	100Step_Domain_p2400.0_to_2500.0	2400	2500	100.0 AA STEP	100	0	0	0	0	0	0	0	1	0	0			0	0	0	0	0	0
CSPG2	Chondroitin sulfate proteoglycan 2 (Versican); isoform CRA_b	A0A024RAQ9_HUMAN	100Step_Domain_p2500.0_to_2600.0	2500	2600	100.0 AA STEP	100	0	0	0	0	0	0	0	1	0	0			0	0	0	0	0	0
CSPG2	Chondroitin sulfate proteoglycan 2 (Versican); isoform CRA_b	A0A024RAQ9_HUMAN	100Step_Domain_p2600.0_to_2700.0	2600	2700	100.0 AA STEP	100	0	0	0	0	0	0	0	1	0	0			0	0	0	0	0	0
CSPG2	Chondroitin sulfate proteoglycan 2 (Versican); isoform CRA_b	A0A024RAQ9_HUMAN	100Step_Domain_p2700.0_to_2800.0	2700	2800	100.0 AA STEP	100	0	0	0	0	0	0	0	1	0	0			0	0	0	0	0	0
CSPG2	Chondroitin sulfate proteoglycan 2 (Versican); isoform CRA_b	A0A024RAQ9_HUMAN	100Step_Domain_p2800.0_to_2900.0	2800	2900	100.0 AA STEP	100	0	0	0	0	0	0	0	1	0	0			0	0	0	0	0	0
CSPG2	Chondroitin sulfate proteoglycan 2 (Versican); isoform CRA_b	A0A024RAQ9_HUMAN	100Step_Domain_p2900.0_to_3000.0	2900	3000	100.0 AA STEP	100	0	0	0	0	0	0	0	1	0	0			0	0	0	0	0	0
CSPG2	Chondroitin sulfate proteoglycan 2 (Versican); isoform CRA_b	A0A024RAQ9_HUMAN	100Step_Domain_p3000.0_to_3100.0	3000	3100	100.0 AA STEP	100	0	0	0	4	0	0	-0.01	1	0	1		GQDSTIAASEQQVAAR	0	0	0	4	0	0
CSPG2	Chondroitin sulfate proteoglycan 2 (Versican); isoform CRA_b	A0A024RAQ9_HUMAN	100Step_Domain_p3100.0_to_3200.0	3100	3200	100.0 AA STEP	100	25	47	0	18	60	4	-0.03	1	24	27	LQGAHLTSILSHEEQMFVNR LQGAHLTSILSHEEQMFVNR	LQGAHLTSILSHEEQMFVNR LQGAHLTSILSHEEQMFVNR NGATCVDGFNTFR NGATCVDGFNTFR	12	26	0	20	92	4
CSPG2	Chondroitin sulfate proteoglycan 2 (Versican); isoform CRA_b	A0A024RAQ9_HUMAN	100Step_Domain_p3200.0_to_3300.0	3200	3300	100.0 AA STEP	100	38	50	27	20	71	9	0.05	1	38	33	LQGAHLTSILSHEEQMFVNR VGHDYQWIGLNDK LQGAHLTSILSHEEQMFVNR VGHDYQWIGLNDK GTVACGQPPVVENAK VGHDYQWIGLNDK	LQGAHLTSILSHEEQMFVNR VGHDYQWIGLNDK LQGAHLTSILSHEEQMFVNR VGHDYQWIGLNDK VGHDYQWIGLNDK	18	28	16	22	108	10
CSPG2	Chondroitin sulfate proteoglycan 2 (Versican); isoform CRA_b	A0A024RAQ9_HUMAN	100Step_Domain_p3300.0_to_3396.0	3300	3396	100.0 AA STEP	96	8	11	14	9	4	5	0.0520833	1	11	6	YEINSLIR YEINSLIR GTVACGQPPVVENAK YEINSLIR	YEINSLIR YEINSLIR YEINSLIR	4	6	8	10	6	6
N/A	Chondroitin sulfate proteoglycan 2 (Versican) variant	Q59FG9_HUMAN	Disordered	434	453	REGIONS	19	0	0	0	0	0	0	0	1	0	0			0	0	0	0	0	0
N/A	Chondroitin sulfate proteoglycan 2 (Versican) variant	Q59FG9_HUMAN	Disordered_617_636	617	636	REGIONS	19	0	0	0	0	0	0	0	1	0	0			0	0	0	0	0	0
N/A	Chondroitin sulfate proteoglycan 2 (Versican) variant	Q59FG9_HUMAN	Disordered_821_843	821	843	REGIONS	22	0	0	0	0	0	0	0	1	0	0			0	0	0	0	0	0
N/A	Chondroitin sulfate proteoglycan 2 (Versican) variant	Q59FG9_HUMAN	Disordered_1140_1168	1140	1168	REGIONS	28	0	0	0	0	0	0	0	1	0	0			0	0	0	0	0	0
N/A	Chondroitin sulfate proteoglycan 2 (Versican) variant	Q59FG9_HUMAN	Disordered_1291_1330	1291	1330	REGIONS	39	0	0	0	0	0	0	0	1	0	0			0	0	0	0	0	0
N/A	Chondroitin sulfate proteoglycan 2 (Versican) variant	Q59FG9_HUMAN	Disordered_1434_1511	1434	1511	REGIONS	77	0	0	0	0	0	0	0	1	0	0			0	0	0	0	0	0
N/A	Chondroitin sulfate proteoglycan 2 (Versican) variant	Q59FG9_HUMAN	Disordered_1524_1553	1524	1553	REGIONS	29	0	0	0	0	0	0	0	1	0	0			0	0	0	0	0	0
N/A	Chondroitin sulfate proteoglycan 2 (Versican) variant	Q59FG9_HUMAN	Disordered_1730_1752	1730	1752	REGIONS	22	0	0	0	0	0	0	0	1	0	0			0	0	0	0	0	0
N/A	Chondroitin sulfate proteoglycan 2 (Versican) variant	Q59FG9_HUMAN	Disordered_1773_1803	1773	1803	REGIONS	30	0	0	0	0	0	0	0	1	0	0			0	0	0	0	0	0
N/A	Chondroitin sulfate proteoglycan 2 (Versican) variant	Q59FG9_HUMAN	Disordered_1976_2008	1976	2008	REGIONS	32	0	0	0	0	0	0	0	1	0	0			0	0	0	0	0	0
N/A	Chondroitin sulfate proteoglycan 2 (Versican) variant	Q59FG9_HUMAN	Disordered_2123_2148	2123	2148	REGIONS	25	8	22	17	29	21	22	-0.32	0	16	24	QEIESETTSEEQIQEEK QEVNPVRQEIESETTSEEQIQEEK QEIESETTSEEQIQEEK QEVNPVRQEIESETTSEEQIQEEK QEIESETTSEEQIQEEK QEVNPVRQEIESETTSEEQIQEEK	QEIESETTSEEQIQEEK QEVNPVRQEIESETTSEEQIQEEK QEIESETTSEEQIQEEK QEVNPVRQEIESETTSEEQIQEEK QEIESETTSEEQIQEEK QEVNPVRQEIESETTSEEQIQEEK	4	12	10	32	32	24
N/A	Chondroitin sulfate proteoglycan 2 (Versican) variant	Q59FG9_HUMAN	Disordered_2182_2202	2182	2202	REGIONS	20	0	0	0	0	0	0	0	1	0	0			0	0	0	0	0	0
N/A	Chondroitin sulfate proteoglycan 2 (Versican) variant	Q59FG9_HUMAN	Disordered_2385_2410	2385	2410	REGIONS	25	0	0	0	0	0	0	0	1	0	0			0	0	0	0	0	0
N/A	Chondroitin sulfate proteoglycan 2 (Versican) variant	Q59FG9_HUMAN	Disordered_2459_2481	2459	2481	REGIONS	22	0	0	0	0	0	0	0	1	0	0			0	0	0	0	0	0
N/A	Chondroitin sulfate proteoglycan 2 (Versican) variant	Q59FG9_HUMAN	Disordered_2507_2532	2507	2532	REGIONS	25	0	0	0	0	0	0	0	1	0	0			0	0	0	0	0	0
N/A	Chondroitin sulfate proteoglycan 2 (Versican) variant	Q59FG9_HUMAN	Disordered_2612_2631	2612	2631	REGIONS	19	0	0	0	0	0	0	0	1	0	0			0	0	0	0	0	0
N/A	Chondroitin sulfate proteoglycan 2 (Versican) variant	Q59FG9_HUMAN	Disordered_2848_2870	2848	2870	REGIONS	22	0	0	0	0	0	0	0	1	0	0			0	0	0	0	0	0
N/A	Chondroitin sulfate proteoglycan 2 (Versican) variant	Q59FG9_HUMAN	Disordered_2895_2919	2895	2919	REGIONS	24	0	0	0	0	0	0	0	1	0	0			0	0	0	0	0	0
N/A	Chondroitin sulfate proteoglycan 2 (Versican) variant	Q59FG9_HUMAN	Disordered_3385_3410	3385	3410	REGIONS	25	0	0	0	0	0	0	0	1	0	0			0	0	0	0	0	0
N/A	Chondroitin sulfate proteoglycan 2 (Versican) variant	Q59FG9_HUMAN	Ig-like	48	160	DOMAINS	112	125	93	172	114	96	172	0.0267857	1	130	127	CDVMYGIEDTQDTVSLTVDGVVFHYR LLASDAGLYR VSVPTHPEAVGDASLTVVK CDVMYGIEDTQDTVSLTVDGVVFHYR LLASDAGLYR VSVPTHPEAVGDASLTVVK CDVMYGIEDTQDTVSLTVDGVVFHYR LLASDAGLYR VSVPTHPEAVGDASLTVVK	CDVMYGIEDTQDTVSLTVDGVVFHYR LLASDAGLYR VSVPTHPEAVGDASLTVVK CDVMYGIEDTQDTVSLTVDGVVFHYR LLASDAGLYR VSVPTHPEAVGDASLTVVK CDVMYGIEDTQDTVSLTVDGVVFHYR LLASDAGLYR VSVPTHPEAVGDASLTVVK	60	52	100	124	146	192
N/A	Chondroitin sulfate proteoglycan 2 (Versican) variant	Q59FG9_HUMAN	Link	164	259	DOMAINS	95	71	82	100	40	55	59	0.347368	0.5726	84	51	CDVMYGIEDTQDTVSLTVDGVVFHYR SPQETYDVYCYVDHLDGDVFHLTVPSK YTLNFEAAQK AATSRYTLNFEAAQK CDVMYGIEDTQDTVSLTVDGVVFHYR SPQETYDVYCYVDHLDGDVFHLTVPSK YTLNFEAAQK CDVMYGIEDTQDTVSLTVDGVVFHYR SPQETYDVYCYVDHLDGDVFHLTVPSK YTLNFEAAQK	CDVMYGIEDTQDTVSLTVDGVVFHYR YTLNFEAAQK AATSRYTLNFEAAQK CDVMYGIEDTQDTVSLTVDGVVFHYR YTLNFEAAQK CDVMYGIEDTQDTVSLTVDGVVFHYR SPQETYDVYCYVDHLDGDVFHLTVPSK YTLNFEAAQK	34	46	58	44	84	66
N/A	Chondroitin sulfate proteoglycan 2 (Versican) variant	Q59FG9_HUMAN	Link_265_361	265	361	DOMAINS	96	167	154	148	170	179	95	0.0833333	1	156	148	AQCGGGLLGVR FTFEEAAK FTFEEAAKECENQDAR LATVGELQAAWR NGFDQCDYGWLSDASVR SPQETYDVYCYVDHLDGDVFHLTVPSK FTFEEAAK FTFEEAAKECENQDAR LATVGELQAAWR LATVGELQAAWRNGFDQCDYGWLSDASVR NGFDQCDYGWLSDASVR SPQETYDVYCYVDHLDGDVFHLTVPSK FTFEEAAK FTFEEAAKECENQDAR LATVGELQAAWR NGFDQCDYGWLSDASVR SPQETYDVYCYVDHLDGDVFHLTVPSK	AQCGGGLLGVR FENQTGFPPPDSR FTFEEAAK FTFEEAAKECENQDAR LATVGELQAAWR NGFDQCDYGWLSDASVR AQCGGGLLGVR FTFEEAAK FTFEEAAKECENQDAR LATVGELQAAWR NGFDQCDYGWLSDASVR AQCGGGLLGVR FTFEEAAK LATVGELQAAWR NGFDQCDYGWLSDASVR SPQETYDVYCYVDHLDGDVFHLTVPSK	80	86	86	186	272	106
N/A	Chondroitin sulfate proteoglycan 2 (Versican) variant	Q59FG9_HUMAN	EGF-like	3103	3139	DOMAINS	36	0	0	0	0	0	0	0	1	0	0			0	0	0	0	0	0
N/A	Chondroitin sulfate proteoglycan 2 (Versican) variant	Q59FG9_HUMAN	EGF-like_3141_3177	3141	3177	DOMAINS	36	0	0	0	0	1	4	-0.0555556	1	0	2		NGATCVDGFNTFR NGATCVDGFNTFR	0	0	0	0	2	4
N/A	Chondroitin sulfate proteoglycan 2 (Versican) variant	Q59FG9_HUMAN	C-type lectin	3190	3304	DOMAINS	114	38	50	21	20	71	9	0.0263158	1	36	33	LQGAHLTSILSHEEQMFVNR VGHDYQWIGLNDK LQGAHLTSILSHEEQMFVNR VGHDYQWIGLNDK VGHDYQWIGLNDK	LQGAHLTSILSHEEQMFVNR VGHDYQWIGLNDK LQGAHLTSILSHEEQMFVNR VGHDYQWIGLNDK VGHDYQWIGLNDK	18	28	12	22	108	10
N/A	Chondroitin sulfate proteoglycan 2 (Versican) variant	Q59FG9_HUMAN	Sushi	3308	3368	DOMAINS	60	8	11	14	9	4	5	0.0833333	1	11	6	YEINSLIR YEINSLIR GTVACGQPPVVENAK YEINSLIR	YEINSLIR YEINSLIR YEINSLIR	4	6	8	10	6	6
N/A	Chondroitin sulfate proteoglycan 2 (Versican) variant	Q59FG9_HUMAN	50Step_Domain_p0_to_50	0	50	50.0 AA STEP	50	0	0	0	0	0	0	0	1	0	0			0	0	0	0	0	0
N/A	Chondroitin sulfate proteoglycan 2 (Versican) variant	Q59FG9_HUMAN	50Step_Domain_p50.0_to_100.0	50	100	50.0 AA STEP	50	0	0	0	0	0	0	0	1	0	0			0	0	0	0	0	0
N/A	Chondroitin sulfate proteoglycan 2 (Versican) variant	Q59FG9_HUMAN	50Step_Domain_p100.0_to_150.0	100	150	50.0 AA STEP	50	125	93	172	114	96	172	0.06	1	130	127	CDVMYGIEDTQDTVSLTVDGVVFHYR LLASDAGLYR VSVPTHPEAVGDASLTVVK CDVMYGIEDTQDTVSLTVDGVVFHYR LLASDAGLYR VSVPTHPEAVGDASLTVVK CDVMYGIEDTQDTVSLTVDGVVFHYR LLASDAGLYR VSVPTHPEAVGDASLTVVK	CDVMYGIEDTQDTVSLTVDGVVFHYR LLASDAGLYR VSVPTHPEAVGDASLTVVK CDVMYGIEDTQDTVSLTVDGVVFHYR LLASDAGLYR VSVPTHPEAVGDASLTVVK CDVMYGIEDTQDTVSLTVDGVVFHYR LLASDAGLYR VSVPTHPEAVGDASLTVVK	60	52	100	124	146	192
N/A	Chondroitin sulfate proteoglycan 2 (Versican) variant	Q59FG9_HUMAN	50Step_Domain_p150.0_to_200.0	150	200	50.0 AA STEP	50	50	68	82	40	55	54	0.34	0.621	67	50	CDVMYGIEDTQDTVSLTVDGVVFHYR YTLNFEAAQK AATSRYTLNFEAAQK CDVMYGIEDTQDTVSLTVDGVVFHYR YTLNFEAAQK CDVMYGIEDTQDTVSLTVDGVVFHYR YTLNFEAAQK	CDVMYGIEDTQDTVSLTVDGVVFHYR YTLNFEAAQK AATSRYTLNFEAAQK CDVMYGIEDTQDTVSLTVDGVVFHYR YTLNFEAAQK CDVMYGIEDTQDTVSLTVDGVVFHYR YTLNFEAAQK	24	38	48	44	84	60
N/A	Chondroitin sulfate proteoglycan 2 (Versican) variant	Q59FG9_HUMAN	50Step_Domain_p200.0_to_250.0	200	250	50.0 AA STEP	50	21	14	17	0	0	5	0.3	1	17	2	SPQETYDVYCYVDHLDGDVFHLTVPSK SPQETYDVYCYVDHLDGDVFHLTVPSK SPQETYDVYCYVDHLDGDVFHLTVPSK	SPQETYDVYCYVDHLDGDVFHLTVPSK	10	8	10	0	0	6
N/A	Chondroitin sulfate proteoglycan 2 (Versican) variant	Q59FG9_HUMAN	50Step_Domain_p250.0_to_300.0	250	300	50.0 AA STEP	50	83	97	89	77	88	61	0.3	1	90	75	FTFEEAAK FTFEEAAKECENQDAR LATVGELQAAWR SPQETYDVYCYVDHLDGDVFHLTVPSK FTFEEAAK FTFEEAAKECENQDAR LATVGELQAAWR LATVGELQAAWRNGFDQCDYGWLSDASVR SPQETYDVYCYVDHLDGDVFHLTVPSK FTFEEAAK FTFEEAAKECENQDAR LATVGELQAAWR SPQETYDVYCYVDHLDGDVFHLTVPSK	FTFEEAAK FTFEEAAKECENQDAR LATVGELQAAWR FTFEEAAK FTFEEAAKECENQDAR LATVGELQAAWR FTFEEAAK LATVGELQAAWR SPQETYDVYCYVDHLDGDVFHLTVPSK	40	54	52	84	134	68
N/A	Chondroitin sulfate proteoglycan 2 (Versican) variant	Q59FG9_HUMAN	50Step_Domain_p300.0_to_350.0	300	350	50.0 AA STEP	50	125	104	110	145	158	63	-0.18	1	113	122	AQCGGGLLGVR LATVGELQAAWR NGFDQCDYGWLSDASVR LATVGELQAAWR LATVGELQAAWRNGFDQCDYGWLSDASVR NGFDQCDYGWLSDASVR LATVGELQAAWR NGFDQCDYGWLSDASVR	AQCGGGLLGVR FENQTGFPPPDSR LATVGELQAAWR NGFDQCDYGWLSDASVR AQCGGGLLGVR LATVGELQAAWR NGFDQCDYGWLSDASVR AQCGGGLLGVR LATVGELQAAWR NGFDQCDYGWLSDASVR	60	58	64	158	240	70
N/A	Chondroitin sulfate proteoglycan 2 (Versican) variant	Q59FG9_HUMAN	50Step_Domain_p350.0_to_400.0	350	400	50.0 AA STEP	50	0	0	0	4	0	0	-0.02	1	0	1		FENQTGFPPPDSR	0	0	0	4	0	0
N/A	Chondroitin sulfate proteoglycan 2 (Versican) variant	Q59FG9_HUMAN	50Step_Domain_p400.0_to_450.0	400	450	50.0 AA STEP	50	0	0	0	0	0	0	0	1	0	0			0	0	0	0	0	0
N/A	Chondroitin sulfate proteoglycan 2 (Versican) variant	Q59FG9_HUMAN	50Step_Domain_p450.0_to_500.0	450	500	50.0 AA STEP	50	0	0	0	0	0	0	0	1	0	0			0	0	0	0	0	0
N/A	Chondroitin sulfate proteoglycan 2 (Versican) variant	Q59FG9_HUMAN	50Step_Domain_p500.0_to_550.0	500	550	50.0 AA STEP	50	0	0	0	0	0	0	0	1	0	0			0	0	0	0	0	0
N/A	Chondroitin sulfate proteoglycan 2 (Versican) variant	Q59FG9_HUMAN	50Step_Domain_p550.0_to_600.0	550	600	50.0 AA STEP	50	0	0	0	0	0	0	0	1	0	0			0	0	0	0	0	0
N/A	Chondroitin sulfate proteoglycan 2 (Versican) variant	Q59FG9_HUMAN	50Step_Domain_p600.0_to_650.0	600	650	50.0 AA STEP	50	4	7	10	7	5	9	0	1	7	7	ITEEFLGK ITEEFLGK ITEEFLGK	ITEEFLGK ITEEFLGK ITEEFLGK	2	4	6	8	8	10
N/A	Chondroitin sulfate proteoglycan 2 (Versican) variant	Q59FG9_HUMAN	50Step_Domain_p650.0_to_700.0	650	700	50.0 AA STEP	50	4	7	10	7	5	9	0	1	7	7	ITEEFLGK ITEEFLGK ITEEFLGK	ITEEFLGK ITEEFLGK ITEEFLGK	2	4	6	8	8	10
N/A	Chondroitin sulfate proteoglycan 2 (Versican) variant	Q59FG9_HUMAN	50Step_Domain_p700.0_to_750.0	700	750	50.0 AA STEP	50	4	4	3	4	1	7	0	1	4	4	TEEEVFSGMK TEEEVFSGMK TEEEVFSGMK	TEEEVFSGMK TEEEVFSGMK TEEEVFSGMK	2	2	2	4	2	8
N/A	Chondroitin sulfate proteoglycan 2 (Versican) variant	Q59FG9_HUMAN	50Step_Domain_p750.0_to_800.0	750	800	50.0 AA STEP	50	0	0	0	0	0	0	0	1	0	0			0	0	0	0	0	0
N/A	Chondroitin sulfate proteoglycan 2 (Versican) variant	Q59FG9_HUMAN	50Step_Domain_p800.0_to_850.0	800	850	50.0 AA STEP	50	0	0	0	0	0	0	0	1	0	0			0	0	0	0	0	0
N/A	Chondroitin sulfate proteoglycan 2 (Versican) variant	Q59FG9_HUMAN	50Step_Domain_p850.0_to_900.0	850	900	50.0 AA STEP	50	0	0	0	4	3	7	-0.1	1	0	5		QLEEVTDEDIAAHGK QLEEVTDEDIAAHGK QLEEVTDEDIAAHGK	0	0	0	4	4	8
N/A	Chondroitin sulfate proteoglycan 2 (Versican) variant	Q59FG9_HUMAN	50Step_Domain_p900.0_to_950.0	900	950	50.0 AA STEP	50	0	0	0	0	0	0	0	1	0	0			0	0	0	0	0	0
N/A	Chondroitin sulfate proteoglycan 2 (Versican) variant	Q59FG9_HUMAN	50Step_Domain_p950.0_to_1000.0	950	1000	50.0 AA STEP	50	0	0	0	0	0	0	0	1	0	0			0	0	0	0	0	0
N/A	Chondroitin sulfate proteoglycan 2 (Versican) variant	Q59FG9_HUMAN	50Step_Domain_p1000.0_to_1050.0	1000	1050	50.0 AA STEP	50	0	0	0	0	0	2	-0.02	1	0	1		ITEGTTQEEFPWK	0	0	0	0	0	2
N/A	Chondroitin sulfate proteoglycan 2 (Versican) variant	Q59FG9_HUMAN	50Step_Domain_p1050.0_to_1100.0	1050	1100	50.0 AA STEP	50	0	0	0	0	0	2	-0.02	1	0	1		ITEGTTQEEFPWK	0	0	0	0	0	2
N/A	Chondroitin sulfate proteoglycan 2 (Versican) variant	Q59FG9_HUMAN	50Step_Domain_p1100.0_to_1150.0	1100	1150	50.0 AA STEP	50	0	0	0	0	0	0	0	1	0	0			0	0	0	0	0	0
N/A	Chondroitin sulfate proteoglycan 2 (Versican) variant	Q59FG9_HUMAN	50Step_Domain_p1150.0_to_1200.0	1150	1200	50.0 AA STEP	50	0	0	0	0	0	0	0	1	0	0			0	0	0	0	0	0
N/A	Chondroitin sulfate proteoglycan 2 (Versican) variant	Q59FG9_HUMAN	50Step_Domain_p1200.0_to_1250.0	1200	1250	50.0 AA STEP	50	0	0	0	0	1	0	0	1	0	0		VTVPSDITTAFSSVDR	0	0	0	0	2	0
N/A	Chondroitin sulfate proteoglycan 2 (Versican) variant	Q59FG9_HUMAN	50Step_Domain_p1250.0_to_1300.0	1250	1300	50.0 AA STEP	50	0	0	0	0	0	0	0	1	0	0			0	0	0	0	0	0
N/A	Chondroitin sulfate proteoglycan 2 (Versican) variant	Q59FG9_HUMAN	50Step_Domain_p1300.0_to_1350.0	1300	1350	50.0 AA STEP	50	0	14	0	0	4	0	0.08	1	5	1	FHPDINVYIIEVR	FHPDINVYIIEVR	0	8	0	0	6	0
N/A	Chondroitin sulfate proteoglycan 2 (Versican) variant	Q59FG9_HUMAN	50Step_Domain_p1350.0_to_1400.0	1350	1400	50.0 AA STEP	50	79	72	65	86	59	99	-0.18	1	72	81	MSDLSVIGHPIDSESK MSDLSVIGHPIDSESK MSDLSVIGHPIDSESK	MSDLSVIGHPIDSESK MSDLSVIGHPIDSESK MSDLSVIGHPIDSESK	38	40	38	94	90	110
N/A	Chondroitin sulfate proteoglycan 2 (Versican) variant	Q59FG9_HUMAN	50Step_Domain_p1400.0_to_1450.0	1400	1450	50.0 AA STEP	50	0	0	0	0	0	0	0	1	0	0			0	0	0	0	0	0
N/A	Chondroitin sulfate proteoglycan 2 (Versican) variant	Q59FG9_HUMAN	50Step_Domain_p1450.0_to_1500.0	1450	1500	50.0 AA STEP	50	0	0	0	0	0	0	0	1	0	0			0	0	0	0	0	0
N/A	Chondroitin sulfate proteoglycan 2 (Versican) variant	Q59FG9_HUMAN	50Step_Domain_p1500.0_to_1550.0	1500	1550	50.0 AA STEP	50	0	0	0	0	0	0	0	1	0	0			0	0	0	0	0	0
N/A	Chondroitin sulfate proteoglycan 2 (Versican) variant	Q59FG9_HUMAN	50Step_Domain_p1550.0_to_1600.0	1550	1600	50.0 AA STEP	50	0	0	0	0	0	2	-0.02	1	0	1		ATEVTFGEEVEK	0	0	0	0	0	2
N/A	Chondroitin sulfate proteoglycan 2 (Versican) variant	Q59FG9_HUMAN	50Step_Domain_p1600.0_to_1650.0	1600	1650	50.0 AA STEP	50	0	0	0	0	0	0	0	1	0	0			0	0	0	0	0	0
N/A	Chondroitin sulfate proteoglycan 2 (Versican) variant	Q59FG9_HUMAN	50Step_Domain_p1650.0_to_1700.0	1650	1700	50.0 AA STEP	50	0	0	0	0	0	0	0	1	0	0			0	0	0	0	0	0
N/A	Chondroitin sulfate proteoglycan 2 (Versican) variant	Q59FG9_HUMAN	50Step_Domain_p1700.0_to_1750.0	1700	1750	50.0 AA STEP	50	0	0	0	0	0	0	0	1	0	0			0	0	0	0	0	0
N/A	Chondroitin sulfate proteoglycan 2 (Versican) variant	Q59FG9_HUMAN	50Step_Domain_p1750.0_to_1800.0	1750	1800	50.0 AA STEP	50	0	0	0	0	0	0	0	1	0	0			0	0	0	0	0	0
N/A	Chondroitin sulfate proteoglycan 2 (Versican) variant	Q59FG9_HUMAN	50Step_Domain_p1800.0_to_1850.0	1800	1850	50.0 AA STEP	50	0	0	0	0	0	0	0	1	0	0			0	0	0	0	0	0
N/A	Chondroitin sulfate proteoglycan 2 (Versican) variant	Q59FG9_HUMAN	50Step_Domain_p1850.0_to_1900.0	1850	1900	50.0 AA STEP	50	0	0	0	0	0	0	0	1	0	0			0	0	0	0	0	0
N/A	Chondroitin sulfate proteoglycan 2 (Versican) variant	Q59FG9_HUMAN	50Step_Domain_p1900.0_to_1950.0	1900	1950	50.0 AA STEP	50	13	11	0	6	4	22	-0.06	1	8	11	LGEPNYGAEIR LGEPNYGAEIR	LGEPNYGAEIR LGEPNYGAEIR LGEPNYGAEIR	6	6	0	6	6	24
N/A	Chondroitin sulfate proteoglycan 2 (Versican) variant	Q59FG9_HUMAN	50Step_Domain_p1950.0_to_2000.0	1950	2000	50.0 AA STEP	50	0	0	0	0	0	0	0	1	0	0			0	0	0	0	0	0
N/A	Chondroitin sulfate proteoglycan 2 (Versican) variant	Q59FG9_HUMAN	50Step_Domain_p2000.0_to_2050.0	2000	2050	50.0 AA STEP	50	0	0	0	0	0	0	0	1	0	0			0	0	0	0	0	0
N/A	Chondroitin sulfate proteoglycan 2 (Versican) variant	Q59FG9_HUMAN	50Step_Domain_p2050.0_to_2100.0	2050	2100	50.0 AA STEP	50	0	0	0	0	0	0	0	1	0	0			0	0	0	0	0	0
N/A	Chondroitin sulfate proteoglycan 2 (Versican) variant	Q59FG9_HUMAN	50Step_Domain_p2100.0_to_2150.0	2100	2150	50.0 AA STEP	50	8	22	17	29	21	22	-0.16	1	16	24	QEIESETTSEEQIQEEK QEVNPVRQEIESETTSEEQIQEEK QEIESETTSEEQIQEEK QEVNPVRQEIESETTSEEQIQEEK QEIESETTSEEQIQEEK QEVNPVRQEIESETTSEEQIQEEK	QEIESETTSEEQIQEEK QEVNPVRQEIESETTSEEQIQEEK QEIESETTSEEQIQEEK QEVNPVRQEIESETTSEEQIQEEK QEIESETTSEEQIQEEK QEVNPVRQEIESETTSEEQIQEEK	4	12	10	32	32	24
N/A	Chondroitin sulfate proteoglycan 2 (Versican) variant	Q59FG9_HUMAN	50Step_Domain_p2150.0_to_2200.0	2150	2200	50.0 AA STEP	50	0	0	0	0	0	0	0	1	0	0			0	0	0	0	0	0
N/A	Chondroitin sulfate proteoglycan 2 (Versican) variant	Q59FG9_HUMAN	50Step_Domain_p2200.0_to_2250.0	2200	2250	50.0 AA STEP	50	0	0	0	0	0	0	0	1	0	0			0	0	0	0	0	0
N/A	Chondroitin sulfate proteoglycan 2 (Versican) variant	Q59FG9_HUMAN	50Step_Domain_p2250.0_to_2300.0	2250	2300	50.0 AA STEP	50	0	0	0	0	0	0	0	1	0	0			0	0	0	0	0	0
N/A	Chondroitin sulfate proteoglycan 2 (Versican) variant	Q59FG9_HUMAN	50Step_Domain_p2300.0_to_2350.0	2300	2350	50.0 AA STEP	50	0	0	0	0	0	0	0	1	0	0			0	0	0	0	0	0
N/A	Chondroitin sulfate proteoglycan 2 (Versican) variant	Q59FG9_HUMAN	50Step_Domain_p2350.0_to_2400.0	2350	2400	50.0 AA STEP	50	0	0	0	0	0	0	0	1	0	0			0	0	0	0	0	0
N/A	Chondroitin sulfate proteoglycan 2 (Versican) variant	Q59FG9_HUMAN	50Step_Domain_p2400.0_to_2450.0	2400	2450	50.0 AA STEP	50	0	0	0	0	0	0	0	1	0	0			0	0	0	0	0	0
N/A	Chondroitin sulfate proteoglycan 2 (Versican) variant	Q59FG9_HUMAN	50Step_Domain_p2450.0_to_2500.0	2450	2500	50.0 AA STEP	50	0	0	0	0	0	0	0	1	0	0			0	0	0	0	0	0
N/A	Chondroitin sulfate proteoglycan 2 (Versican) variant	Q59FG9_HUMAN	50Step_Domain_p2500.0_to_2550.0	2500	2550	50.0 AA STEP	50	0	0	0	0	0	0	0	1	0	0			0	0	0	0	0	0
N/A	Chondroitin sulfate proteoglycan 2 (Versican) variant	Q59FG9_HUMAN	50Step_Domain_p2550.0_to_2600.0	2550	2600	50.0 AA STEP	50	0	0	0	0	0	0	0	1	0	0			0	0	0	0	0	0
N/A	Chondroitin sulfate proteoglycan 2 (Versican) variant	Q59FG9_HUMAN	50Step_Domain_p2600.0_to_2650.0	2600	2650	50.0 AA STEP	50	0	0	0	0	0	0	0	1	0	0			0	0	0	0	0	0
N/A	Chondroitin sulfate proteoglycan 2 (Versican) variant	Q59FG9_HUMAN	50Step_Domain_p2650.0_to_2700.0	2650	2700	50.0 AA STEP	50	0	0	0	0	0	0	0	1	0	0			0	0	0	0	0	0
N/A	Chondroitin sulfate proteoglycan 2 (Versican) variant	Q59FG9_HUMAN	50Step_Domain_p2700.0_to_2750.0	2700	2750	50.0 AA STEP	50	0	0	0	0	0	0	0	1	0	0			0	0	0	0	0	0
N/A	Chondroitin sulfate proteoglycan 2 (Versican) variant	Q59FG9_HUMAN	50Step_Domain_p2750.0_to_2800.0	2750	2800	50.0 AA STEP	50	0	0	0	0	0	0	0	1	0	0			0	0	0	0	0	0
N/A	Chondroitin sulfate proteoglycan 2 (Versican) variant	Q59FG9_HUMAN	50Step_Domain_p2800.0_to_2850.0	2800	2850	50.0 AA STEP	50	0	0	0	0	0	0	0	1	0	0			0	0	0	0	0	0
N/A	Chondroitin sulfate proteoglycan 2 (Versican) variant	Q59FG9_HUMAN	50Step_Domain_p2850.0_to_2900.0	2850	2900	50.0 AA STEP	50	0	0	0	0	0	0	0	1	0	0			0	0	0	0	0	0
N/A	Chondroitin sulfate proteoglycan 2 (Versican) variant	Q59FG9_HUMAN	50Step_Domain_p2900.0_to_2950.0	2900	2950	50.0 AA STEP	50	0	0	0	0	0	0	0	1	0	0			0	0	0	0	0	0
N/A	Chondroitin sulfate proteoglycan 2 (Versican) variant	Q59FG9_HUMAN	50Step_Domain_p2950.0_to_3000.0	2950	3000	50.0 AA STEP	50	0	0	0	0	0	0	0	1	0	0			0	0	0	0	0	0
N/A	Chondroitin sulfate proteoglycan 2 (Versican) variant	Q59FG9_HUMAN	50Step_Domain_p3000.0_to_3050.0	3000	3050	50.0 AA STEP	50	0	0	0	4	0	0	-0.02	1	0	1		GQDSTIAASEQQVAAR	0	0	0	4	0	0
N/A	Chondroitin sulfate proteoglycan 2 (Versican) variant	Q59FG9_HUMAN	50Step_Domain_p3050.0_to_3100.0	3050	3100	50.0 AA STEP	50	0	0	0	0	0	0	0	1	0	0			0	0	0	0	0	0
N/A	Chondroitin sulfate proteoglycan 2 (Versican) variant	Q59FG9_HUMAN	50Step_Domain_p3100.0_to_3150.0	3100	3150	50.0 AA STEP	50	0	0	0	0	0	0	0	1	0	0			0	0	0	0	0	0
N/A	Chondroitin sulfate proteoglycan 2 (Versican) variant	Q59FG9_HUMAN	50Step_Domain_p3150.0_to_3200.0	3150	3200	50.0 AA STEP	50	0	0	0	0	1	4	-0.04	1	0	2		NGATCVDGFNTFR NGATCVDGFNTFR	0	0	0	0	2	4
N/A	Chondroitin sulfate proteoglycan 2 (Versican) variant	Q59FG9_HUMAN	50Step_Domain_p3200.0_to_3250.0	3200	3250	50.0 AA STEP	50	38	50	21	20	71	9	0.06	1	36	33	LQGAHLTSILSHEEQMFVNR VGHDYQWIGLNDK LQGAHLTSILSHEEQMFVNR VGHDYQWIGLNDK VGHDYQWIGLNDK	LQGAHLTSILSHEEQMFVNR VGHDYQWIGLNDK LQGAHLTSILSHEEQMFVNR VGHDYQWIGLNDK VGHDYQWIGLNDK	18	28	12	22	108	10
N/A	Chondroitin sulfate proteoglycan 2 (Versican) variant	Q59FG9_HUMAN	50Step_Domain_p3250.0_to_3300.0	3250	3300	50.0 AA STEP	50	0	0	0	0	0	0	0	1	0	0			0	0	0	0	0	0
N/A	Chondroitin sulfate proteoglycan 2 (Versican) variant	Q59FG9_HUMAN	50Step_Domain_p3300.0_to_3350.0	3300	3350	50.0 AA STEP	50	8	11	14	9	4	5	0.1	1	11	6	YEINSLIR YEINSLIR GTVACGQPPVVENAK YEINSLIR	YEINSLIR YEINSLIR YEINSLIR	4	6	8	10	6	6
N/A	Chondroitin sulfate proteoglycan 2 (Versican) variant	Q59FG9_HUMAN	50Step_Domain_p3350.0_to_3400.0	3350	3400	50.0 AA STEP	50	0	0	0	0	0	0	0	1	0	0			0	0	0	0	0	0
N/A	Chondroitin sulfate proteoglycan 2 (Versican) variant	Q59FG9_HUMAN	50Step_Domain_p3400.0_to_3410.0	3400	3410	50.0 AA STEP	10	0	0	0	0	0	0	0	1	0	0			0	0	0	0	0	0
N/A	Chondroitin sulfate proteoglycan 2 (Versican) variant	Q59FG9_HUMAN	80Step_Domain_p0_to_80	0	80	80.0 AA STEP	80	0	0	0	0	0	0	0	1	0	0			0	0	0	0	0	0
N/A	Chondroitin sulfate proteoglycan 2 (Versican) variant	Q59FG9_HUMAN	80Step_Domain_p80.0_to_160.0	80	160	80.0 AA STEP	80	125	93	172	114	96	172	0.0375	1	130	127	CDVMYGIEDTQDTVSLTVDGVVFHYR LLASDAGLYR VSVPTHPEAVGDASLTVVK CDVMYGIEDTQDTVSLTVDGVVFHYR LLASDAGLYR VSVPTHPEAVGDASLTVVK CDVMYGIEDTQDTVSLTVDGVVFHYR LLASDAGLYR VSVPTHPEAVGDASLTVVK	CDVMYGIEDTQDTVSLTVDGVVFHYR LLASDAGLYR VSVPTHPEAVGDASLTVVK CDVMYGIEDTQDTVSLTVDGVVFHYR LLASDAGLYR VSVPTHPEAVGDASLTVVK CDVMYGIEDTQDTVSLTVDGVVFHYR LLASDAGLYR VSVPTHPEAVGDASLTVVK	60	52	100	124	146	192
N/A	Chondroitin sulfate proteoglycan 2 (Versican) variant	Q59FG9_HUMAN	80Step_Domain_p160.0_to_240.0	160	240	80.0 AA STEP	80	50	68	82	40	55	54	0.2125	1	67	50	CDVMYGIEDTQDTVSLTVDGVVFHYR YTLNFEAAQK AATSRYTLNFEAAQK CDVMYGIEDTQDTVSLTVDGVVFHYR YTLNFEAAQK CDVMYGIEDTQDTVSLTVDGVVFHYR YTLNFEAAQK	CDVMYGIEDTQDTVSLTVDGVVFHYR YTLNFEAAQK AATSRYTLNFEAAQK CDVMYGIEDTQDTVSLTVDGVVFHYR YTLNFEAAQK CDVMYGIEDTQDTVSLTVDGVVFHYR YTLNFEAAQK	24	38	48	44	84	60
N/A	Chondroitin sulfate proteoglycan 2 (Versican) variant	Q59FG9_HUMAN	80Step_Domain_p240.0_to_320.0	240	320	80.0 AA STEP	80	163	154	148	163	178	93	0.125	1	155	145	FTFEEAAK FTFEEAAKECENQDAR LATVGELQAAWR NGFDQCDYGWLSDASVR SPQETYDVYCYVDHLDGDVFHLTVPSK FTFEEAAK FTFEEAAKECENQDAR LATVGELQAAWR LATVGELQAAWRNGFDQCDYGWLSDASVR NGFDQCDYGWLSDASVR SPQETYDVYCYVDHLDGDVFHLTVPSK FTFEEAAK FTFEEAAKECENQDAR LATVGELQAAWR NGFDQCDYGWLSDASVR SPQETYDVYCYVDHLDGDVFHLTVPSK	FTFEEAAK FTFEEAAKECENQDAR LATVGELQAAWR NGFDQCDYGWLSDASVR FTFEEAAK FTFEEAAKECENQDAR LATVGELQAAWR NGFDQCDYGWLSDASVR FTFEEAAK LATVGELQAAWR NGFDQCDYGWLSDASVR SPQETYDVYCYVDHLDGDVFHLTVPSK	78	86	86	178	270	104
N/A	Chondroitin sulfate proteoglycan 2 (Versican) variant	Q59FG9_HUMAN	80Step_Domain_p320.0_to_400.0	320	400	80.0 AA STEP	80	4	0	0	7	1	2	-0.025	1	1	3	AQCGGGLLGVR	AQCGGGLLGVR FENQTGFPPPDSR AQCGGGLLGVR AQCGGGLLGVR	2	0	0	8	2	2
N/A	Chondroitin sulfate proteoglycan 2 (Versican) variant	Q59FG9_HUMAN	80Step_Domain_p400.0_to_480.0	400	480	80.0 AA STEP	80	0	0	0	0	0	0	0	1	0	0			0	0	0	0	0	0
N/A	Chondroitin sulfate proteoglycan 2 (Versican) variant	Q59FG9_HUMAN	80Step_Domain_p480.0_to_560.0	480	560	80.0 AA STEP	80	0	0	0	0	0	0	0	1	0	0			0	0	0	0	0	0
N/A	Chondroitin sulfate proteoglycan 2 (Versican) variant	Q59FG9_HUMAN	80Step_Domain_p560.0_to_640.0	560	640	80.0 AA STEP	80	0	0	0	0	0	0	0	1	0	0			0	0	0	0	0	0
N/A	Chondroitin sulfate proteoglycan 2 (Versican) variant	Q59FG9_HUMAN	80Step_Domain_p640.0_to_720.0	640	720	80.0 AA STEP	80	4	7	10	7	5	9	0	1	7	7	ITEEFLGK ITEEFLGK ITEEFLGK	ITEEFLGK ITEEFLGK ITEEFLGK	2	4	6	8	8	10
N/A	Chondroitin sulfate proteoglycan 2 (Versican) variant	Q59FG9_HUMAN	80Step_Domain_p720.0_to_800.0	720	800	80.0 AA STEP	80	4	4	3	4	1	7	0	1	4	4	TEEEVFSGMK TEEEVFSGMK TEEEVFSGMK	TEEEVFSGMK TEEEVFSGMK TEEEVFSGMK	2	2	2	4	2	8
N/A	Chondroitin sulfate proteoglycan 2 (Versican) variant	Q59FG9_HUMAN	80Step_Domain_p800.0_to_880.0	800	880	80.0 AA STEP	80	0	0	0	4	3	7	-0.0625	1	0	5		QLEEVTDEDIAAHGK QLEEVTDEDIAAHGK QLEEVTDEDIAAHGK	0	0	0	4	4	8
N/A	Chondroitin sulfate proteoglycan 2 (Versican) variant	Q59FG9_HUMAN	80Step_Domain_p880.0_to_960.0	880	960	80.0 AA STEP	80	0	0	0	4	3	7	-0.0625	1	0	5		QLEEVTDEDIAAHGK QLEEVTDEDIAAHGK QLEEVTDEDIAAHGK	0	0	0	4	4	8
N/A	Chondroitin sulfate proteoglycan 2 (Versican) variant	Q59FG9_HUMAN	80Step_Domain_p960.0_to_1040.0	960	1040	80.0 AA STEP	80	0	0	0	0	0	2	-0.0125	1	0	1		ITEGTTQEEFPWK	0	0	0	0	0	2
N/A	Chondroitin sulfate proteoglycan 2 (Versican) variant	Q59FG9_HUMAN	80Step_Domain_p1040.0_to_1120.0	1040	1120	80.0 AA STEP	80	0	0	0	0	0	2	-0.0125	1	0	1		ITEGTTQEEFPWK	0	0	0	0	0	2
N/A	Chondroitin sulfate proteoglycan 2 (Versican) variant	Q59FG9_HUMAN	80Step_Domain_p1120.0_to_1200.0	1120	1200	80.0 AA STEP	80	0	0	0	0	0	0	0	1	0	0			0	0	0	0	0	0
N/A	Chondroitin sulfate proteoglycan 2 (Versican) variant	Q59FG9_HUMAN	80Step_Domain_p1200.0_to_1280.0	1200	1280	80.0 AA STEP	80	0	0	0	0	1	0	0	1	0	0		VTVPSDITTAFSSVDR	0	0	0	0	2	0
N/A	Chondroitin sulfate proteoglycan 2 (Versican) variant	Q59FG9_HUMAN	80Step_Domain_p1280.0_to_1360.0	1280	1360	80.0 AA STEP	80	79	86	65	86	63	99	-0.075	1	77	83	MSDLSVIGHPIDSESK FHPDINVYIIEVR MSDLSVIGHPIDSESK MSDLSVIGHPIDSESK	MSDLSVIGHPIDSESK FHPDINVYIIEVR MSDLSVIGHPIDSESK MSDLSVIGHPIDSESK	38	48	38	94	96	110
N/A	Chondroitin sulfate proteoglycan 2 (Versican) variant	Q59FG9_HUMAN	80Step_Domain_p1360.0_to_1440.0	1360	1440	80.0 AA STEP	80	79	72	65	86	59	99	-0.1125	1	72	81	MSDLSVIGHPIDSESK MSDLSVIGHPIDSESK MSDLSVIGHPIDSESK	MSDLSVIGHPIDSESK MSDLSVIGHPIDSESK MSDLSVIGHPIDSESK	38	40	38	94	90	110
N/A	Chondroitin sulfate proteoglycan 2 (Versican) variant	Q59FG9_HUMAN	80Step_Domain_p1440.0_to_1520.0	1440	1520	80.0 AA STEP	80	0	0	0	0	0	0	0	1	0	0			0	0	0	0	0	0
N/A	Chondroitin sulfate proteoglycan 2 (Versican) variant	Q59FG9_HUMAN	80Step_Domain_p1520.0_to_1600.0	1520	1600	80.0 AA STEP	80	0	0	0	0	0	2	-0.0125	1	0	1		ATEVTFGEEVEK	0	0	0	0	0	2
N/A	Chondroitin sulfate proteoglycan 2 (Versican) variant	Q59FG9_HUMAN	80Step_Domain_p1600.0_to_1680.0	1600	1680	80.0 AA STEP	80	0	0	0	0	0	0	0	1	0	0			0	0	0	0	0	0
N/A	Chondroitin sulfate proteoglycan 2 (Versican) variant	Q59FG9_HUMAN	80Step_Domain_p1680.0_to_1760.0	1680	1760	80.0 AA STEP	80	0	0	0	0	0	0	0	1	0	0			0	0	0	0	0	0
N/A	Chondroitin sulfate proteoglycan 2 (Versican) variant	Q59FG9_HUMAN	80Step_Domain_p1760.0_to_1840.0	1760	1840	80.0 AA STEP	80	0	0	0	0	0	0	0	1	0	0			0	0	0	0	0	0
N/A	Chondroitin sulfate proteoglycan 2 (Versican) variant	Q59FG9_HUMAN	80Step_Domain_p1840.0_to_1920.0	1840	1920	80.0 AA STEP	80	0	0	0	0	0	0	0	1	0	0			0	0	0	0	0	0
N/A	Chondroitin sulfate proteoglycan 2 (Versican) variant	Q59FG9_HUMAN	80Step_Domain_p1920.0_to_2000.0	1920	2000	80.0 AA STEP	80	13	11	0	6	4	22	-0.0375	1	8	11	LGEPNYGAEIR LGEPNYGAEIR	LGEPNYGAEIR LGEPNYGAEIR LGEPNYGAEIR	6	6	0	6	6	24
N/A	Chondroitin sulfate proteoglycan 2 (Versican) variant	Q59FG9_HUMAN	80Step_Domain_p2000.0_to_2080.0	2000	2080	80.0 AA STEP	80	0	0	0	0	0	0	0	1	0	0			0	0	0	0	0	0
N/A	Chondroitin sulfate proteoglycan 2 (Versican) variant	Q59FG9_HUMAN	80Step_Domain_p2080.0_to_2160.0	2080	2160	80.0 AA STEP	80	8	22	17	29	21	22	-0.1	1	16	24	QEIESETTSEEQIQEEK QEVNPVRQEIESETTSEEQIQEEK QEIESETTSEEQIQEEK QEVNPVRQEIESETTSEEQIQEEK QEIESETTSEEQIQEEK QEVNPVRQEIESETTSEEQIQEEK	QEIESETTSEEQIQEEK QEVNPVRQEIESETTSEEQIQEEK QEIESETTSEEQIQEEK QEVNPVRQEIESETTSEEQIQEEK QEIESETTSEEQIQEEK QEVNPVRQEIESETTSEEQIQEEK	4	12	10	32	32	24
N/A	Chondroitin sulfate proteoglycan 2 (Versican) variant	Q59FG9_HUMAN	80Step_Domain_p2160.0_to_2240.0	2160	2240	80.0 AA STEP	80	0	0	0	0	0	0	0	1	0	0			0	0	0	0	0	0
N/A	Chondroitin sulfate proteoglycan 2 (Versican) variant	Q59FG9_HUMAN	80Step_Domain_p2240.0_to_2320.0	2240	2320	80.0 AA STEP	80	0	0	0	0	0	0	0	1	0	0			0	0	0	0	0	0
N/A	Chondroitin sulfate proteoglycan 2 (Versican) variant	Q59FG9_HUMAN	80Step_Domain_p2320.0_to_2400.0	2320	2400	80.0 AA STEP	80	0	0	0	0	0	0	0	1	0	0			0	0	0	0	0	0
N/A	Chondroitin sulfate proteoglycan 2 (Versican) variant	Q59FG9_HUMAN	80Step_Domain_p2400.0_to_2480.0	2400	2480	80.0 AA STEP	80	0	0	0	0	0	0	0	1	0	0			0	0	0	0	0	0
N/A	Chondroitin sulfate proteoglycan 2 (Versican) variant	Q59FG9_HUMAN	80Step_Domain_p2480.0_to_2560.0	2480	2560	80.0 AA STEP	80	0	0	0	0	0	0	0	1	0	0			0	0	0	0	0	0
N/A	Chondroitin sulfate proteoglycan 2 (Versican) variant	Q59FG9_HUMAN	80Step_Domain_p2560.0_to_2640.0	2560	2640	80.0 AA STEP	80	0	0	0	0	0	0	0	1	0	0			0	0	0	0	0	0
N/A	Chondroitin sulfate proteoglycan 2 (Versican) variant	Q59FG9_HUMAN	80Step_Domain_p2640.0_to_2720.0	2640	2720	80.0 AA STEP	80	0	0	0	0	0	0	0	1	0	0			0	0	0	0	0	0
N/A	Chondroitin sulfate proteoglycan 2 (Versican) variant	Q59FG9_HUMAN	80Step_Domain_p2720.0_to_2800.0	2720	2800	80.0 AA STEP	80	0	0	0	0	0	0	0	1	0	0			0	0	0	0	0	0
N/A	Chondroitin sulfate proteoglycan 2 (Versican) variant	Q59FG9_HUMAN	80Step_Domain_p2800.0_to_2880.0	2800	2880	80.0 AA STEP	80	0	0	0	0	0	0	0	1	0	0			0	0	0	0	0	0
N/A	Chondroitin sulfate proteoglycan 2 (Versican) variant	Q59FG9_HUMAN	80Step_Domain_p2880.0_to_2960.0	2880	2960	80.0 AA STEP	80	0	0	0	0	0	0	0	1	0	0			0	0	0	0	0	0
N/A	Chondroitin sulfate proteoglycan 2 (Versican) variant	Q59FG9_HUMAN	80Step_Domain_p2960.0_to_3040.0	2960	3040	80.0 AA STEP	80	0	0	0	4	0	0	-0.0125	1	0	1		GQDSTIAASEQQVAAR	0	0	0	4	0	0
N/A	Chondroitin sulfate proteoglycan 2 (Versican) variant	Q59FG9_HUMAN	80Step_Domain_p3040.0_to_3120.0	3040	3120	80.0 AA STEP	80	0	0	0	4	0	0	-0.0125	1	0	1		GQDSTIAASEQQVAAR	0	0	0	4	0	0
N/A	Chondroitin sulfate proteoglycan 2 (Versican) variant	Q59FG9_HUMAN	80Step_Domain_p3120.0_to_3200.0	3120	3200	80.0 AA STEP	80	0	0	0	0	1	4	-0.025	1	0	2		NGATCVDGFNTFR NGATCVDGFNTFR	0	0	0	0	2	4
N/A	Chondroitin sulfate proteoglycan 2 (Versican) variant	Q59FG9_HUMAN	80Step_Domain_p3200.0_to_3280.0	3200	3280	80.0 AA STEP	80	38	50	21	20	71	9	0.0375	1	36	33	LQGAHLTSILSHEEQMFVNR VGHDYQWIGLNDK LQGAHLTSILSHEEQMFVNR VGHDYQWIGLNDK VGHDYQWIGLNDK	LQGAHLTSILSHEEQMFVNR VGHDYQWIGLNDK LQGAHLTSILSHEEQMFVNR VGHDYQWIGLNDK VGHDYQWIGLNDK	18	28	12	22	108	10
N/A	Chondroitin sulfate proteoglycan 2 (Versican) variant	Q59FG9_HUMAN	80Step_Domain_p3280.0_to_3360.0	3280	3360	80.0 AA STEP	80	8	11	14	9	4	5	0.0625	1	11	6	YEINSLIR YEINSLIR GTVACGQPPVVENAK YEINSLIR	YEINSLIR YEINSLIR YEINSLIR	4	6	8	10	6	6
N/A	Chondroitin sulfate proteoglycan 2 (Versican) variant	Q59FG9_HUMAN	80Step_Domain_p3360.0_to_3410.0	3360	3410	80.0 AA STEP	50	0	0	0	0	0	0	0	1	0	0			0	0	0	0	0	0
N/A	Chondroitin sulfate proteoglycan 2 (Versican) variant	Q59FG9_HUMAN	100Step_Domain_p0_to_100	0	100	100.0 AA STEP	100	0	0	0	0	0	0	0	1	0	0			0	0	0	0	0	0
N/A	Chondroitin sulfate proteoglycan 2 (Versican) variant	Q59FG9_HUMAN	100Step_Domain_p100.0_to_200.0	100	200	100.0 AA STEP	100	163	140	206	145	130	203	0.11	1	170	159	CDVMYGIEDTQDTVSLTVDGVVFHYR LLASDAGLYR VSVPTHPEAVGDASLTVVK YTLNFEAAQK AATSRYTLNFEAAQK CDVMYGIEDTQDTVSLTVDGVVFHYR LLASDAGLYR VSVPTHPEAVGDASLTVVK YTLNFEAAQK CDVMYGIEDTQDTVSLTVDGVVFHYR LLASDAGLYR VSVPTHPEAVGDASLTVVK YTLNFEAAQK	CDVMYGIEDTQDTVSLTVDGVVFHYR LLASDAGLYR VSVPTHPEAVGDASLTVVK YTLNFEAAQK AATSRYTLNFEAAQK CDVMYGIEDTQDTVSLTVDGVVFHYR LLASDAGLYR VSVPTHPEAVGDASLTVVK YTLNFEAAQK CDVMYGIEDTQDTVSLTVDGVVFHYR LLASDAGLYR VSVPTHPEAVGDASLTVVK YTLNFEAAQK	78	78	120	158	198	226
N/A	Chondroitin sulfate proteoglycan 2 (Versican) variant	Q59FG9_HUMAN	100Step_Domain_p200.0_to_300.0	200	300	100.0 AA STEP	100	83	97	89	77	88	61	0.15	1	90	75	FTFEEAAK FTFEEAAKECENQDAR LATVGELQAAWR SPQETYDVYCYVDHLDGDVFHLTVPSK FTFEEAAK FTFEEAAKECENQDAR LATVGELQAAWR LATVGELQAAWRNGFDQCDYGWLSDASVR SPQETYDVYCYVDHLDGDVFHLTVPSK FTFEEAAK FTFEEAAKECENQDAR LATVGELQAAWR SPQETYDVYCYVDHLDGDVFHLTVPSK	FTFEEAAK FTFEEAAKECENQDAR LATVGELQAAWR FTFEEAAK FTFEEAAKECENQDAR LATVGELQAAWR FTFEEAAK LATVGELQAAWR SPQETYDVYCYVDHLDGDVFHLTVPSK	40	54	52	84	134	68
N/A	Chondroitin sulfate proteoglycan 2 (Versican) variant	Q59FG9_HUMAN	100Step_Domain_p300.0_to_400.0	300	400	100.0 AA STEP	100	125	104	110	145	158	63	-0.09	1	113	122	AQCGGGLLGVR LATVGELQAAWR NGFDQCDYGWLSDASVR LATVGELQAAWR LATVGELQAAWRNGFDQCDYGWLSDASVR NGFDQCDYGWLSDASVR LATVGELQAAWR NGFDQCDYGWLSDASVR	AQCGGGLLGVR FENQTGFPPPDSR LATVGELQAAWR NGFDQCDYGWLSDASVR AQCGGGLLGVR LATVGELQAAWR NGFDQCDYGWLSDASVR AQCGGGLLGVR LATVGELQAAWR NGFDQCDYGWLSDASVR	60	58	64	158	240	70
N/A	Chondroitin sulfate proteoglycan 2 (Versican) variant	Q59FG9_HUMAN	100Step_Domain_p400.0_to_500.0	400	500	100.0 AA STEP	100	0	0	0	0	0	0	0	1	0	0			0	0	0	0	0	0
N/A	Chondroitin sulfate proteoglycan 2 (Versican) variant	Q59FG9_HUMAN	100Step_Domain_p500.0_to_600.0	500	600	100.0 AA STEP	100	0	0	0	0	0	0	0	1	0	0			0	0	0	0	0	0
N/A	Chondroitin sulfate proteoglycan 2 (Versican) variant	Q59FG9_HUMAN	100Step_Domain_p600.0_to_700.0	600	700	100.0 AA STEP	100	4	7	10	7	5	9	0	1	7	7	ITEEFLGK ITEEFLGK ITEEFLGK	ITEEFLGK ITEEFLGK ITEEFLGK	2	4	6	8	8	10
N/A	Chondroitin sulfate proteoglycan 2 (Versican) variant	Q59FG9_HUMAN	100Step_Domain_p700.0_to_800.0	700	800	100.0 AA STEP	100	4	4	3	4	1	7	0	1	4	4	TEEEVFSGMK TEEEVFSGMK TEEEVFSGMK	TEEEVFSGMK TEEEVFSGMK TEEEVFSGMK	2	2	2	4	2	8
N/A	Chondroitin sulfate proteoglycan 2 (Versican) variant	Q59FG9_HUMAN	100Step_Domain_p800.0_to_900.0	800	900	100.0 AA STEP	100	0	0	0	4	3	7	-0.05	1	0	5		QLEEVTDEDIAAHGK QLEEVTDEDIAAHGK QLEEVTDEDIAAHGK	0	0	0	4	4	8
N/A	Chondroitin sulfate proteoglycan 2 (Versican) variant	Q59FG9_HUMAN	100Step_Domain_p900.0_to_1000.0	900	1000	100.0 AA STEP	100	0	0	0	0	0	0	0	1	0	0			0	0	0	0	0	0
N/A	Chondroitin sulfate proteoglycan 2 (Versican) variant	Q59FG9_HUMAN	100Step_Domain_p1000.0_to_1100.0	1000	1100	100.0 AA STEP	100	0	0	0	0	0	2	-0.01	1	0	1		ITEGTTQEEFPWK	0	0	0	0	0	2
N/A	Chondroitin sulfate proteoglycan 2 (Versican) variant	Q59FG9_HUMAN	100Step_Domain_p1100.0_to_1200.0	1100	1200	100.0 AA STEP	100	0	0	0	0	0	0	0	1	0	0			0	0	0	0	0	0
N/A	Chondroitin sulfate proteoglycan 2 (Versican) variant	Q59FG9_HUMAN	100Step_Domain_p1200.0_to_1300.0	1200	1300	100.0 AA STEP	100	0	0	0	0	1	0	0	1	0	0		VTVPSDITTAFSSVDR	0	0	0	0	2	0
N/A	Chondroitin sulfate proteoglycan 2 (Versican) variant	Q59FG9_HUMAN	100Step_Domain_p1300.0_to_1400.0	1300	1400	100.0 AA STEP	100	79	86	65	86	63	99	-0.06	1	77	83	MSDLSVIGHPIDSESK FHPDINVYIIEVR MSDLSVIGHPIDSESK MSDLSVIGHPIDSESK	MSDLSVIGHPIDSESK FHPDINVYIIEVR MSDLSVIGHPIDSESK MSDLSVIGHPIDSESK	38	48	38	94	96	110
N/A	Chondroitin sulfate proteoglycan 2 (Versican) variant	Q59FG9_HUMAN	100Step_Domain_p1400.0_to_1500.0	1400	1500	100.0 AA STEP	100	0	0	0	0	0	0	0	1	0	0			0	0	0	0	0	0
N/A	Chondroitin sulfate proteoglycan 2 (Versican) variant	Q59FG9_HUMAN	100Step_Domain_p1500.0_to_1600.0	1500	1600	100.0 AA STEP	100	0	0	0	0	0	2	-0.01	1	0	1		ATEVTFGEEVEK	0	0	0	0	0	2
N/A	Chondroitin sulfate proteoglycan 2 (Versican) variant	Q59FG9_HUMAN	100Step_Domain_p1600.0_to_1700.0	1600	1700	100.0 AA STEP	100	0	0	0	0	0	0	0	1	0	0			0	0	0	0	0	0
N/A	Chondroitin sulfate proteoglycan 2 (Versican) variant	Q59FG9_HUMAN	100Step_Domain_p1700.0_to_1800.0	1700	1800	100.0 AA STEP	100	0	0	0	0	0	0	0	1	0	0			0	0	0	0	0	0
N/A	Chondroitin sulfate proteoglycan 2 (Versican) variant	Q59FG9_HUMAN	100Step_Domain_p1800.0_to_1900.0	1800	1900	100.0 AA STEP	100	0	0	0	0	0	0	0	1	0	0			0	0	0	0	0	0
N/A	Chondroitin sulfate proteoglycan 2 (Versican) variant	Q59FG9_HUMAN	100Step_Domain_p1900.0_to_2000.0	1900	2000	100.0 AA STEP	100	13	11	0	6	4	22	-0.03	1	8	11	LGEPNYGAEIR LGEPNYGAEIR	LGEPNYGAEIR LGEPNYGAEIR LGEPNYGAEIR	6	6	0	6	6	24
N/A	Chondroitin sulfate proteoglycan 2 (Versican) variant	Q59FG9_HUMAN	100Step_Domain_p2000.0_to_2100.0	2000	2100	100.0 AA STEP	100	0	0	0	0	0	0	0	1	0	0			0	0	0	0	0	0
N/A	Chondroitin sulfate proteoglycan 2 (Versican) variant	Q59FG9_HUMAN	100Step_Domain_p2100.0_to_2200.0	2100	2200	100.0 AA STEP	100	8	22	17	29	21	22	-0.08	1	16	24	QEIESETTSEEQIQEEK QEVNPVRQEIESETTSEEQIQEEK QEIESETTSEEQIQEEK QEVNPVRQEIESETTSEEQIQEEK QEIESETTSEEQIQEEK QEVNPVRQEIESETTSEEQIQEEK	QEIESETTSEEQIQEEK QEVNPVRQEIESETTSEEQIQEEK QEIESETTSEEQIQEEK QEVNPVRQEIESETTSEEQIQEEK QEIESETTSEEQIQEEK QEVNPVRQEIESETTSEEQIQEEK	4	12	10	32	32	24
N/A	Chondroitin sulfate proteoglycan 2 (Versican) variant	Q59FG9_HUMAN	100Step_Domain_p2200.0_to_2300.0	2200	2300	100.0 AA STEP	100	0	0	0	0	0	0	0	1	0	0			0	0	0	0	0	0
N/A	Chondroitin sulfate proteoglycan 2 (Versican) variant	Q59FG9_HUMAN	100Step_Domain_p2300.0_to_2400.0	2300	2400	100.0 AA STEP	100	0	0	0	0	0	0	0	1	0	0			0	0	0	0	0	0
N/A	Chondroitin sulfate proteoglycan 2 (Versican) variant	Q59FG9_HUMAN	100Step_Domain_p2400.0_to_2500.0	2400	2500	100.0 AA STEP	100	0	0	0	0	0	0	0	1	0	0			0	0	0	0	0	0
N/A	Chondroitin sulfate proteoglycan 2 (Versican) variant	Q59FG9_HUMAN	100Step_Domain_p2500.0_to_2600.0	2500	2600	100.0 AA STEP	100	0	0	0	0	0	0	0	1	0	0			0	0	0	0	0	0
N/A	Chondroitin sulfate proteoglycan 2 (Versican) variant	Q59FG9_HUMAN	100Step_Domain_p2600.0_to_2700.0	2600	2700	100.0 AA STEP	100	0	0	0	0	0	0	0	1	0	0			0	0	0	0	0	0
N/A	Chondroitin sulfate proteoglycan 2 (Versican) variant	Q59FG9_HUMAN	100Step_Domain_p2700.0_to_2800.0	2700	2800	100.0 AA STEP	100	0	0	0	0	0	0	0	1	0	0			0	0	0	0	0	0
N/A	Chondroitin sulfate proteoglycan 2 (Versican) variant	Q59FG9_HUMAN	100Step_Domain_p2800.0_to_2900.0	2800	2900	100.0 AA STEP	100	0	0	0	0	0	0	0	1	0	0			0	0	0	0	0	0
N/A	Chondroitin sulfate proteoglycan 2 (Versican) variant	Q59FG9_HUMAN	100Step_Domain_p2900.0_to_3000.0	2900	3000	100.0 AA STEP	100	0	0	0	0	0	0	0	1	0	0			0	0	0	0	0	0
N/A	Chondroitin sulfate proteoglycan 2 (Versican) variant	Q59FG9_HUMAN	100Step_Domain_p3000.0_to_3100.0	3000	3100	100.0 AA STEP	100	0	0	0	4	0	0	-0.01	1	0	1		GQDSTIAASEQQVAAR	0	0	0	4	0	0
N/A	Chondroitin sulfate proteoglycan 2 (Versican) variant	Q59FG9_HUMAN	100Step_Domain_p3100.0_to_3200.0	3100	3200	100.0 AA STEP	100	0	0	0	0	1	4	-0.02	1	0	2		NGATCVDGFNTFR NGATCVDGFNTFR	0	0	0	0	2	4
N/A	Chondroitin sulfate proteoglycan 2 (Versican) variant	Q59FG9_HUMAN	100Step_Domain_p3200.0_to_3300.0	3200	3300	100.0 AA STEP	100	38	50	21	20	71	9	0.03	1	36	33	LQGAHLTSILSHEEQMFVNR VGHDYQWIGLNDK LQGAHLTSILSHEEQMFVNR VGHDYQWIGLNDK VGHDYQWIGLNDK	LQGAHLTSILSHEEQMFVNR VGHDYQWIGLNDK LQGAHLTSILSHEEQMFVNR VGHDYQWIGLNDK VGHDYQWIGLNDK	18	28	12	22	108	10
N/A	Chondroitin sulfate proteoglycan 2 (Versican) variant	Q59FG9_HUMAN	100Step_Domain_p3300.0_to_3400.0	3300	3400	100.0 AA STEP	100	8	11	14	9	4	5	0.05	1	11	6	YEINSLIR YEINSLIR GTVACGQPPVVENAK YEINSLIR	YEINSLIR YEINSLIR YEINSLIR	4	6	8	10	6	6
N/A	Chondroitin sulfate proteoglycan 2 (Versican) variant	Q59FG9_HUMAN	100Step_Domain_p3400.0_to_3410.0	3400	3410	100.0 AA STEP	10	0	0	0	0	0	0	0	1	0	0			0	0	0	0	0	0
CHRD	Chordin	E7ESX1_HUMAN	Disordered	124	168	REGIONS	44	6	2	3	3	4	0	0.0454545	0.6897	4	2	GDGHTDFVALLTGPR GDGHTDFVALLTGPR GDGHTDFVALLTGPR	GDGHTDFVALLTGPR QPSGLSFEYPR GDGHTDFVALLTGPR	4	2	2	6	2	0
CHRD	Chordin	E7ESX1_HUMAN	Disordered_675_703	675	703	REGIONS	28	0	0	0	0	0	0	0	1	0	0			0	0	0	0	0	0
CHRD	Chordin	E7ESX1_HUMAN	Disordered_934_954	934	954	REGIONS	20	0	2	0	0	0	0	0.05	1	1	0	TDPELEKEAEGS		0	2	0	0	0	0
CHRD	Chordin	E7ESX1_HUMAN	VWFC	49	126	DOMAINS	77	0	0	0	0	0	0	0	1	0	0			0	0	0	0	0	0
CHRD	Chordin	E7ESX1_HUMAN	CHRD	168	277	DOMAINS	109	6	2	3	3	4	0	0.0183486	1	4	2	GDGHTDFVALLTGPR GDGHTDFVALLTGPR GDGHTDFVALLTGPR	AEQLHVALVTLTHPSGEVWGPLIR GDGHTDFVALLTGPR GDGHTDFVALLTGPR	4	2	2	6	2	0
CHRD	Chordin	E7ESX1_HUMAN	CHRD_279_402	279	402	DOMAINS	123	3	5	3	4	0	0	0.0243902	0.4512	4	1	LQILHQGQLLR LQILHQGQLLR SGGLTQVPLR SGGLTQVPLR	LQILHQGQLLR SGGLTQVPLR	2	4	2	8	0	0
CHRD	Chordin	E7ESX1_HUMAN	CHRD_403_524	403	524	DOMAINS	121	0	0	0	1	4	0	-0.0165289	1	0	2		DFPDGELR DFPDGELR	0	0	0	2	2	0
CHRD	Chordin	E7ESX1_HUMAN	CHRD_530_650	530	650	DOMAINS	120	3	2	6	3	4	0	0.0166667	1	4	2	DLEPELLR DLEPELLR DLEPELLR	DLEPELLR GFYGSEAQGVVK HDTLPVPLAGALVLPPVK DLEPELLR	2	2	4	6	2	0
CHRD	Chordin	E7ESX1_HUMAN	VWFC_703_763	703	763	DOMAINS	60	0	0	0	0	0	0	0	1	0	0			0	0	0	0	0	0
CHRD	Chordin	E7ESX1_HUMAN	50Step_Domain_p0_to_50	0	50	50.0 AA STEP	50	0	0	0	0	0	0	0	1	0	0			0	0	0	0	0	0
CHRD	Chordin	E7ESX1_HUMAN	50Step_Domain_p50.0_to_100.0	50	100	50.0 AA STEP	50	0	0	0	0	0	0	0	1	0	0			0	0	0	0	0	0
CHRD	Chordin	E7ESX1_HUMAN	50Step_Domain_p100.0_to_150.0	100	150	50.0 AA STEP	50	0	0	0	1	0	0	0	1	0	0		QPSGLSFEYPR	0	0	0	2	0	0
CHRD	Chordin	E7ESX1_HUMAN	50Step_Domain_p150.0_to_200.0	150	200	50.0 AA STEP	50	6	2	3	2	4	0	0.04	0.39	4	2	GDGHTDFVALLTGPR GDGHTDFVALLTGPR GDGHTDFVALLTGPR	GDGHTDFVALLTGPR GDGHTDFVALLTGPR	4	2	2	4	2	0
CHRD	Chordin	E7ESX1_HUMAN	50Step_Domain_p200.0_to_250.0	200	250	50.0 AA STEP	50	0	0	0	0	0	0	0	1	0	0			0	0	0	0	0	0
CHRD	Chordin	E7ESX1_HUMAN	50Step_Domain_p250.0_to_300.0	250	300	50.0 AA STEP	50	0	0	0	1	0	0	0	1	0	0		AEQLHVALVTLTHPSGEVWGPLIR	0	0	0	2	0	0
CHRD	Chordin	E7ESX1_HUMAN	50Step_Domain_p300.0_to_350.0	300	350	50.0 AA STEP	50	3	5	3	4	0	0	0.06	0.026	4	1	LQILHQGQLLR LQILHQGQLLR SGGLTQVPLR SGGLTQVPLR	LQILHQGQLLR SGGLTQVPLR	2	4	2	8	0	0
CHRD	Chordin	E7ESX1_HUMAN	50Step_Domain_p350.0_to_400.0	350	400	50.0 AA STEP	50	0	0	0	0	0	0	0	1	0	0			0	0	0	0	0	0
CHRD	Chordin	E7ESX1_HUMAN	50Step_Domain_p400.0_to_450.0	400	450	50.0 AA STEP	50	0	0	0	0	0	0	0	1	0	0			0	0	0	0	0	0
CHRD	Chordin	E7ESX1_HUMAN	50Step_Domain_p450.0_to_500.0	450	500	50.0 AA STEP	50	0	0	0	0	0	0	0	1	0	0			0	0	0	0	0	0
CHRD	Chordin	E7ESX1_HUMAN	50Step_Domain_p500.0_to_550.0	500	550	50.0 AA STEP	50	0	0	0	2	4	0	-0.04	0.108	0	2		DFPDGELR HDTLPVPLAGALVLPPVK DFPDGELR	0	0	0	4	2	0
CHRD	Chordin	E7ESX1_HUMAN	50Step_Domain_p550.0_to_600.0	550	600	50.0 AA STEP	50	0	0	0	0	0	0	0	1	0	0			0	0	0	0	0	0
CHRD	Chordin	E7ESX1_HUMAN	50Step_Domain_p600.0_to_650.0	600	650	50.0 AA STEP	50	3	2	6	2	4	0	0.04	0.39	4	2	DLEPELLR DLEPELLR DLEPELLR	DLEPELLR GFYGSEAQGVVK DLEPELLR	2	2	4	4	2	0
CHRD	Chordin	E7ESX1_HUMAN	50Step_Domain_p650.0_to_700.0	650	700	50.0 AA STEP	50	0	0	0	0	0	0	0	1	0	0			0	0	0	0	0	0
CHRD	Chordin	E7ESX1_HUMAN	50Step_Domain_p700.0_to_750.0	700	750	50.0 AA STEP	50	0	0	0	0	0	0	0	1	0	0			0	0	0	0	0	0
CHRD	Chordin	E7ESX1_HUMAN	50Step_Domain_p750.0_to_800.0	750	800	50.0 AA STEP	50	0	0	0	0	0	0	0	1	0	0			0	0	0	0	0	0
CHRD	Chordin	E7ESX1_HUMAN	50Step_Domain_p800.0_to_850.0	800	850	50.0 AA STEP	50	0	0	0	0	0	0	0	1	0	0			0	0	0	0	0	0
CHRD	Chordin	E7ESX1_HUMAN	50Step_Domain_p850.0_to_900.0	850	900	50.0 AA STEP	50	0	0	0	0	0	0	0	1	0	0			0	0	0	0	0	0
CHRD	Chordin	E7ESX1_HUMAN	50Step_Domain_p900.0_to_950.0	900	950	50.0 AA STEP	50	0	2	0	0	0	0	0.02	1	1	0	TDPELEKEAEGS		0	2	0	0	0	0
CHRD	Chordin	E7ESX1_HUMAN	50Step_Domain_p950.0_to_954.0	950	954	50.0 AA STEP	4	0	0	0	0	0	0	0	1	0	0			0	0	0	0	0	0
CHRD	Chordin	E7ESX1_HUMAN	80Step_Domain_p0_to_80	0	80	80.0 AA STEP	80	0	0	0	0	0	0	0	1	0	0			0	0	0	0	0	0
CHRD	Chordin	E7ESX1_HUMAN	80Step_Domain_p80.0_to_160.0	80	160	80.0 AA STEP	80	0	0	0	1	0	0	0	1	0	0		QPSGLSFEYPR	0	0	0	2	0	0
CHRD	Chordin	E7ESX1_HUMAN	80Step_Domain_p160.0_to_240.0	160	240	80.0 AA STEP	80	6	2	3	2	4	0	0.025	0.852	4	2	GDGHTDFVALLTGPR GDGHTDFVALLTGPR GDGHTDFVALLTGPR	GDGHTDFVALLTGPR GDGHTDFVALLTGPR	4	2	2	4	2	0
CHRD	Chordin	E7ESX1_HUMAN	80Step_Domain_p240.0_to_320.0	240	320	80.0 AA STEP	80	0	0	0	1	0	0	0	1	0	0		AEQLHVALVTLTHPSGEVWGPLIR	0	0	0	2	0	0
CHRD	Chordin	E7ESX1_HUMAN	80Step_Domain_p320.0_to_400.0	320	400	80.0 AA STEP	80	3	5	3	4	0	0	0.0375	0.1536	4	1	LQILHQGQLLR LQILHQGQLLR SGGLTQVPLR SGGLTQVPLR	LQILHQGQLLR SGGLTQVPLR	2	4	2	8	0	0
CHRD	Chordin	E7ESX1_HUMAN	80Step_Domain_p400.0_to_480.0	400	480	80.0 AA STEP	80	0	0	0	0	0	0	0	1	0	0			0	0	0	0	0	0
CHRD	Chordin	E7ESX1_HUMAN	80Step_Domain_p480.0_to_560.0	480	560	80.0 AA STEP	80	0	0	0	2	4	0	-0.025	0.378	0	2		DFPDGELR HDTLPVPLAGALVLPPVK DFPDGELR	0	0	0	4	2	0
CHRD	Chordin	E7ESX1_HUMAN	80Step_Domain_p560.0_to_640.0	560	640	80.0 AA STEP	80	3	2	6	2	4	0	0.025	0.852	4	2	DLEPELLR DLEPELLR DLEPELLR	DLEPELLR GFYGSEAQGVVK DLEPELLR	2	2	4	4	2	0
CHRD	Chordin	E7ESX1_HUMAN	80Step_Domain_p640.0_to_720.0	640	720	80.0 AA STEP	80	0	0	0	0	0	0	0	1	0	0			0	0	0	0	0	0
CHRD	Chordin	E7ESX1_HUMAN	80Step_Domain_p720.0_to_800.0	720	800	80.0 AA STEP	80	0	0	0	0	0	0	0	1	0	0			0	0	0	0	0	0
CHRD	Chordin	E7ESX1_HUMAN	80Step_Domain_p800.0_to_880.0	800	880	80.0 AA STEP	80	0	0	0	0	0	0	0	1	0	0			0	0	0	0	0	0
CHRD	Chordin	E7ESX1_HUMAN	80Step_Domain_p880.0_to_954.0	880	954	80.0 AA STEP	74	0	2	0	0	0	0	0.0135135	1	1	0	TDPELEKEAEGS		0	2	0	0	0	0
CHRD	Chordin	E7ESX1_HUMAN	100Step_Domain_p0_to_100	0	100	100.0 AA STEP	100	0	0	0	0	0	0	0	1	0	0			0	0	0	0	0	0
CHRD	Chordin	E7ESX1_HUMAN	100Step_Domain_p100.0_to_200.0	100	200	100.0 AA STEP	100	6	2	3	3	4	0	0.02	1	4	2	GDGHTDFVALLTGPR GDGHTDFVALLTGPR GDGHTDFVALLTGPR	GDGHTDFVALLTGPR QPSGLSFEYPR GDGHTDFVALLTGPR	4	2	2	6	2	0
CHRD	Chordin	E7ESX1_HUMAN	100Step_Domain_p200.0_to_300.0	200	300	100.0 AA STEP	100	0	0	0	1	0	0	0	1	0	0		AEQLHVALVTLTHPSGEVWGPLIR	0	0	0	2	0	0
CHRD	Chordin	E7ESX1_HUMAN	100Step_Domain_p300.0_to_400.0	300	400	100.0 AA STEP	100	3	5	3	4	0	0	0.03	0.233	4	1	LQILHQGQLLR LQILHQGQLLR SGGLTQVPLR SGGLTQVPLR	LQILHQGQLLR SGGLTQVPLR	2	4	2	8	0	0
CHRD	Chordin	E7ESX1_HUMAN	100Step_Domain_p400.0_to_500.0	400	500	100.0 AA STEP	100	0	0	0	0	0	0	0	1	0	0			0	0	0	0	0	0
CHRD	Chordin	E7ESX1_HUMAN	100Step_Domain_p500.0_to_600.0	500	600	100.0 AA STEP	100	0	0	0	2	4	0	-0.02	0.498	0	2		DFPDGELR HDTLPVPLAGALVLPPVK DFPDGELR	0	0	0	4	2	0
CHRD	Chordin	E7ESX1_HUMAN	100Step_Domain_p600.0_to_700.0	600	700	100.0 AA STEP	100	3	2	6	2	4	0	0.02	0.997	4	2	DLEPELLR DLEPELLR DLEPELLR	DLEPELLR GFYGSEAQGVVK DLEPELLR	2	2	4	4	2	0
CHRD	Chordin	E7ESX1_HUMAN	100Step_Domain_p700.0_to_800.0	700	800	100.0 AA STEP	100	0	0	0	0	0	0	0	1	0	0			0	0	0	0	0	0
CHRD	Chordin	E7ESX1_HUMAN	100Step_Domain_p800.0_to_900.0	800	900	100.0 AA STEP	100	0	0	0	0	0	0	0	1	0	0			0	0	0	0	0	0
CHRD	Chordin	E7ESX1_HUMAN	100Step_Domain_p900.0_to_954.0	900	954	100.0 AA STEP	54	0	2	0	0	0	0	0.0185185	1	1	0	TDPELEKEAEGS		0	2	0	0	0	0
CHRD	Chordin	CHRD_HUMAN	VWFC 1	49	126	DOMAINS	77	0	0	0	0	0	0	0	1	0	0			0	0	0	0	0	0
CHRD	Chordin	CHRD_HUMAN	CHRD 1	168	277	DOMAINS	109	6	2	3	3	4	0	0.0183486	1	4	2	GDGHTDFVALLTGPR GDGHTDFVALLTGPR GDGHTDFVALLTGPR	AEQLHVALVTLTHPSGEVWGPLIR GDGHTDFVALLTGPR GDGHTDFVALLTGPR	4	2	2	6	2	0
CHRD	Chordin	CHRD_HUMAN	CHRD 2	279	402	DOMAINS	123	3	5	3	4	0	0	0.0243902	0.3152	4	1	LQILHQGQLLR LQILHQGQLLR SGGLTQVPLR SGGLTQVPLR	LQILHQGQLLR SGGLTQVPLR	2	4	2	8	0	0
CHRD	Chordin	CHRD_HUMAN	CHRD 3	403	524	DOMAINS	121	0	0	0	1	4	0	-0.0165289	1	0	2		DFPDGELR DFPDGELR	0	0	0	2	2	0
CHRD	Chordin	CHRD_HUMAN	CHRD 4	530	650	DOMAINS	120	3	2	6	3	4	0	0.0166667	1	4	2	DLEPELLR DLEPELLR DLEPELLR	DLEPELLR GFYGSEAQGVVK HDTLPVPLAGALVLPPVK DLEPELLR	2	2	4	6	2	0
CHRD	Chordin	CHRD_HUMAN	VWFC 2	703	763	DOMAINS	60	0	0	0	0	0	0	0	1	0	0			0	0	0	0	0	0
CHRD	Chordin	CHRD_HUMAN	VWFC 3	784	850	DOMAINS	66	0	0	0	0	0	0	0	1	0	0			0	0	0	0	0	0
CHRD	Chordin	CHRD_HUMAN	VWFC 4	872	932	DOMAINS	60	0	0	0	0	0	0	0	1	0	0			0	0	0	0	0	0
CHRD	Chordin	CHRD_HUMAN	50Step_Domain_p0_to_50	0	50	50.0 AA STEP	50	0	0	0	0	0	0	0	1	0	0			0	0	0	0	0	0
CHRD	Chordin	CHRD_HUMAN	50Step_Domain_p50.0_to_100.0	50	100	50.0 AA STEP	50	0	0	0	0	0	0	0	1	0	0			0	0	0	0	0	0
CHRD	Chordin	CHRD_HUMAN	50Step_Domain_p100.0_to_150.0	100	150	50.0 AA STEP	50	0	0	0	1	0	0	0	1	0	0		QPSGLSFEYPR	0	0	0	2	0	0
CHRD	Chordin	CHRD_HUMAN	50Step_Domain_p150.0_to_200.0	150	200	50.0 AA STEP	50	6	2	3	2	4	0	0.04	0.39	4	2	GDGHTDFVALLTGPR GDGHTDFVALLTGPR GDGHTDFVALLTGPR	GDGHTDFVALLTGPR GDGHTDFVALLTGPR	4	2	2	4	2	0
CHRD	Chordin	CHRD_HUMAN	50Step_Domain_p200.0_to_250.0	200	250	50.0 AA STEP	50	0	0	0	0	0	0	0	1	0	0			0	0	0	0	0	0
CHRD	Chordin	CHRD_HUMAN	50Step_Domain_p250.0_to_300.0	250	300	50.0 AA STEP	50	0	0	0	1	0	0	0	1	0	0		AEQLHVALVTLTHPSGEVWGPLIR	0	0	0	2	0	0
CHRD	Chordin	CHRD_HUMAN	50Step_Domain_p300.0_to_350.0	300	350	50.0 AA STEP	50	3	5	3	4	0	0	0.06	0.026	4	1	LQILHQGQLLR LQILHQGQLLR SGGLTQVPLR SGGLTQVPLR	LQILHQGQLLR SGGLTQVPLR	2	4	2	8	0	0
CHRD	Chordin	CHRD_HUMAN	50Step_Domain_p350.0_to_400.0	350	400	50.0 AA STEP	50	0	0	0	0	0	0	0	1	0	0			0	0	0	0	0	0
CHRD	Chordin	CHRD_HUMAN	50Step_Domain_p400.0_to_450.0	400	450	50.0 AA STEP	50	0	0	0	0	0	0	0	1	0	0			0	0	0	0	0	0
CHRD	Chordin	CHRD_HUMAN	50Step_Domain_p450.0_to_500.0	450	500	50.0 AA STEP	50	0	0	0	0	0	0	0	1	0	0			0	0	0	0	0	0
CHRD	Chordin	CHRD_HUMAN	50Step_Domain_p500.0_to_550.0	500	550	50.0 AA STEP	50	0	0	0	2	4	0	-0.04	0.108	0	2		DFPDGELR HDTLPVPLAGALVLPPVK DFPDGELR	0	0	0	4	2	0
CHRD	Chordin	CHRD_HUMAN	50Step_Domain_p550.0_to_600.0	550	600	50.0 AA STEP	50	0	0	0	0	0	0	0	1	0	0			0	0	0	0	0	0
CHRD	Chordin	CHRD_HUMAN	50Step_Domain_p600.0_to_650.0	600	650	50.0 AA STEP	50	3	2	6	2	4	0	0.04	0.39	4	2	DLEPELLR DLEPELLR DLEPELLR	DLEPELLR GFYGSEAQGVVK DLEPELLR	2	2	4	4	2	0
CHRD	Chordin	CHRD_HUMAN	50Step_Domain_p650.0_to_700.0	650	700	50.0 AA STEP	50	0	0	0	0	0	0	0	1	0	0			0	0	0	0	0	0
CHRD	Chordin	CHRD_HUMAN	50Step_Domain_p700.0_to_750.0	700	750	50.0 AA STEP	50	0	0	0	0	0	0	0	1	0	0			0	0	0	0	0	0
CHRD	Chordin	CHRD_HUMAN	50Step_Domain_p750.0_to_800.0	750	800	50.0 AA STEP	50	0	0	0	0	0	0	0	1	0	0			0	0	0	0	0	0
CHRD	Chordin	CHRD_HUMAN	50Step_Domain_p800.0_to_850.0	800	850	50.0 AA STEP	50	0	0	0	0	0	0	0	1	0	0			0	0	0	0	0	0
CHRD	Chordin	CHRD_HUMAN	50Step_Domain_p850.0_to_900.0	850	900	50.0 AA STEP	50	0	0	0	0	0	0	0	1	0	0			0	0	0	0	0	0
CHRD	Chordin	CHRD_HUMAN	50Step_Domain_p900.0_to_950.0	900	950	50.0 AA STEP	50	0	2	0	0	0	0	0.02	1	1	0	TDPELEKEAEGS		0	2	0	0	0	0
CHRD	Chordin	CHRD_HUMAN	50Step_Domain_p950.0_to_955.0	950	955	50.0 AA STEP	5	0	0	0	0	0	0	0	1	0	0			0	0	0	0	0	0
CHRD	Chordin	CHRD_HUMAN	80Step_Domain_p0_to_80	0	80	80.0 AA STEP	80	0	0	0	0	0	0	0	1	0	0			0	0	0	0	0	0
CHRD	Chordin	CHRD_HUMAN	80Step_Domain_p80.0_to_160.0	80	160	80.0 AA STEP	80	0	0	0	1	0	0	0	1	0	0		QPSGLSFEYPR	0	0	0	2	0	0
CHRD	Chordin	CHRD_HUMAN	80Step_Domain_p160.0_to_240.0	160	240	80.0 AA STEP	80	6	2	3	2	4	0	0.025	0.852	4	2	GDGHTDFVALLTGPR GDGHTDFVALLTGPR GDGHTDFVALLTGPR	GDGHTDFVALLTGPR GDGHTDFVALLTGPR	4	2	2	4	2	0
CHRD	Chordin	CHRD_HUMAN	80Step_Domain_p240.0_to_320.0	240	320	80.0 AA STEP	80	0	0	0	1	0	0	0	1	0	0		AEQLHVALVTLTHPSGEVWGPLIR	0	0	0	2	0	0
CHRD	Chordin	CHRD_HUMAN	80Step_Domain_p320.0_to_400.0	320	400	80.0 AA STEP	80	3	5	3	4	0	0	0.0375	0.1536	4	1	LQILHQGQLLR LQILHQGQLLR SGGLTQVPLR SGGLTQVPLR	LQILHQGQLLR SGGLTQVPLR	2	4	2	8	0	0
CHRD	Chordin	CHRD_HUMAN	80Step_Domain_p400.0_to_480.0	400	480	80.0 AA STEP	80	0	0	0	0	0	0	0	1	0	0			0	0	0	0	0	0
CHRD	Chordin	CHRD_HUMAN	80Step_Domain_p480.0_to_560.0	480	560	80.0 AA STEP	80	0	0	0	2	4	0	-0.025	0.378	0	2		DFPDGELR HDTLPVPLAGALVLPPVK DFPDGELR	0	0	0	4	2	0
CHRD	Chordin	CHRD_HUMAN	80Step_Domain_p560.0_to_640.0	560	640	80.0 AA STEP	80	3	2	6	2	4	0	0.025	0.852	4	2	DLEPELLR DLEPELLR DLEPELLR	DLEPELLR GFYGSEAQGVVK DLEPELLR	2	2	4	4	2	0
CHRD	Chordin	CHRD_HUMAN	80Step_Domain_p640.0_to_720.0	640	720	80.0 AA STEP	80	0	0	0	0	0	0	0	1	0	0			0	0	0	0	0	0
CHRD	Chordin	CHRD_HUMAN	80Step_Domain_p720.0_to_800.0	720	800	80.0 AA STEP	80	0	0	0	0	0	0	0	1	0	0			0	0	0	0	0	0
CHRD	Chordin	CHRD_HUMAN	80Step_Domain_p800.0_to_880.0	800	880	80.0 AA STEP	80	0	0	0	0	0	0	0	1	0	0			0	0	0	0	0	0
CHRD	Chordin	CHRD_HUMAN	80Step_Domain_p880.0_to_955.0	880	955	80.0 AA STEP	75	0	2	0	0	0	0	0.0133333	1	1	0	TDPELEKEAEGS		0	2	0	0	0	0
CHRD	Chordin	CHRD_HUMAN	100Step_Domain_p0_to_100	0	100	100.0 AA STEP	100	0	0	0	0	0	0	0	1	0	0			0	0	0	0	0	0
CHRD	Chordin	CHRD_HUMAN	100Step_Domain_p100.0_to_200.0	100	200	100.0 AA STEP	100	6	2	3	3	4	0	0.02	1	4	2	GDGHTDFVALLTGPR GDGHTDFVALLTGPR GDGHTDFVALLTGPR	GDGHTDFVALLTGPR QPSGLSFEYPR GDGHTDFVALLTGPR	4	2	2	6	2	0
CHRD	Chordin	CHRD_HUMAN	100Step_Domain_p200.0_to_300.0	200	300	100.0 AA STEP	100	0	0	0	1	0	0	0	1	0	0		AEQLHVALVTLTHPSGEVWGPLIR	0	0	0	2	0	0
CHRD	Chordin	CHRD_HUMAN	100Step_Domain_p300.0_to_400.0	300	400	100.0 AA STEP	100	3	5	3	4	0	0	0.03	0.233	4	1	LQILHQGQLLR LQILHQGQLLR SGGLTQVPLR SGGLTQVPLR	LQILHQGQLLR SGGLTQVPLR	2	4	2	8	0	0
CHRD	Chordin	CHRD_HUMAN	100Step_Domain_p400.0_to_500.0	400	500	100.0 AA STEP	100	0	0	0	0	0	0	0	1	0	0			0	0	0	0	0	0
CHRD	Chordin	CHRD_HUMAN	100Step_Domain_p500.0_to_600.0	500	600	100.0 AA STEP	100	0	0	0	2	4	0	-0.02	0.498	0	2		DFPDGELR HDTLPVPLAGALVLPPVK DFPDGELR	0	0	0	4	2	0
CHRD	Chordin	CHRD_HUMAN	100Step_Domain_p600.0_to_700.0	600	700	100.0 AA STEP	100	3	2	6	2	4	0	0.02	0.997	4	2	DLEPELLR DLEPELLR DLEPELLR	DLEPELLR GFYGSEAQGVVK DLEPELLR	2	2	4	4	2	0
CHRD	Chordin	CHRD_HUMAN	100Step_Domain_p700.0_to_800.0	700	800	100.0 AA STEP	100	0	0	0	0	0	0	0	1	0	0			0	0	0	0	0	0
CHRD	Chordin	CHRD_HUMAN	100Step_Domain_p800.0_to_900.0	800	900	100.0 AA STEP	100	0	0	0	0	0	0	0	1	0	0			0	0	0	0	0	0
CHRD	Chordin	CHRD_HUMAN	100Step_Domain_p900.0_to_955.0	900	955	100.0 AA STEP	55	0	2	0	0	0	0	0.0181818	1	1	0	TDPELEKEAEGS		0	2	0	0	0	0
ITIH4	Inter-alpha-trypsin inhibitor heavy chain H4	ITIH4_HUMAN	Proline-rich (PRR) potential bioactive peptide	658	688	REGIONS	30	7	0	0	0	0	0	0.0666667	0.39	2	0	QLGLPGPPDVPDHAAYHPFR		14	0	0	0	0	0
ITIH4	Inter-alpha-trypsin inhibitor heavy chain H4	ITIH4_HUMAN	O-glycosylated at three sites	719	725	REGIONS	6	0	0	0	0	0	0	0	1	0	0			0	0	0	0	0	0
ITIH4	Inter-alpha-trypsin inhibitor heavy chain H4	ITIH4_HUMAN	VIT	29	148	DOMAINS	119	24	17	30	0	0	0	0.201681	0.0002	24	0	AEAQAQYSAAVAK ANTVQEATFQMELPK NMEQFQVSVSVAPNAK ANTVQEATFQMELPK ITFELVYEELLK NMEQFQVSVSVAPNAK AEAQAQYSAAVAK ANTVQEATFQMELPK		48	18	6	0	0	0
ITIH4	Inter-alpha-trypsin inhibitor heavy chain H4	ITIH4_HUMAN	VWFA	272	432	DOMAINS	160	15	8	10	0	0	0	0.06875	0.0136	11	0	AISGGSIQIENGYFVHYFAPEGLTTMPK DQFNLIVFSTEATQWRPSLVPASAENVNK ILDDLSPR LALDNGGLAR NVVFVIDK SFAAGIQALGGTNINDAMLMAVQLLDSSNQEER DQFNLIVFSTEATQWRPSLVPASAENVNK ILDDLSPR NVVFVIDK ILDDLSPR		30	8	2	0	0	0
ITIH4	Inter-alpha-trypsin inhibitor heavy chain H4	ITIH4_HUMAN	50Step_Domain_p0_to_50	0	50	50.0 AA STEP	50	0	0	0	0	0	0	0	1	0	0			0	0	0	0	0	0
ITIH4	Inter-alpha-trypsin inhibitor heavy chain H4	ITIH4_HUMAN	50Step_Domain_p50.0_to_100.0	50	100	50.0 AA STEP	50	15	10	30	0	0	0	0.36	0	18	0	AEAQAQYSAAVAK ANTVQEATFQMELPK ANTVQEATFQMELPK AEAQAQYSAAVAK ANTVQEATFQMELPK		30	10	6	0	0	0
ITIH4	Inter-alpha-trypsin inhibitor heavy chain H4	ITIH4_HUMAN	50Step_Domain_p100.0_to_150.0	100	150	50.0 AA STEP	50	13	8	10	0	0	0	0.2	0.0209	10	0	AEAQAQYSAAVAK NMEQFQVSVSVAPNAK ITFELVYEELLK NMEQFQVSVSVAPNAK AEAQAQYSAAVAK		26	8	2	0	0	0
ITIH4	Inter-alpha-trypsin inhibitor heavy chain H4	ITIH4_HUMAN	50Step_Domain_p150.0_to_200.0	150	200	50.0 AA STEP	50	6	8	0	0	0	0	0.1	1	5	0	LGVYELLLK ITFELVYEELLK LGVYELLLK		12	8	0	0	0	0
ITIH4	Inter-alpha-trypsin inhibitor heavy chain H4	ITIH4_HUMAN	50Step_Domain_p200.0_to_250.0	200	250	50.0 AA STEP	50	10	2	10	0	0	0	0.14	0.3458	7	0	AISGGSIQIENGYFVHYFAPEGLTTMPK SPEQQETVLDGNLIIR SPEQQETVLDGNLIIR SPEQQETVLDGNLIIR		20	2	2	0	0	0
ITIH4	Inter-alpha-trypsin inhibitor heavy chain H4	ITIH4_HUMAN	50Step_Domain_p250.0_to_300.0	250	300	50.0 AA STEP	50	10	6	10	0	0	0	0.18	0.1064	9	0	AISGGSIQIENGYFVHYFAPEGLTTMPK ILDDLSPR NVVFVIDK ILDDLSPR NVVFVIDK ILDDLSPR		20	6	2	0	0	0
ITIH4	Inter-alpha-trypsin inhibitor heavy chain H4	ITIH4_HUMAN	50Step_Domain_p300.0_to_350.0	300	350	50.0 AA STEP	50	7	6	10	0	0	0	0.16	0.2603	8	0	DQFNLIVFSTEATQWRPSLVPASAENVNK ILDDLSPR SFAAGIQALGGTNINDAMLMAVQLLDSSNQEER DQFNLIVFSTEATQWRPSLVPASAENVNK ILDDLSPR ILDDLSPR		14	6	2	0	0	0
ITIH4	Inter-alpha-trypsin inhibitor heavy chain H4	ITIH4_HUMAN	50Step_Domain_p350.0_to_400.0	350	400	50.0 AA STEP	50	1	0	0	0	0	0	0	1	0	0	SFAAGIQALGGTNINDAMLMAVQLLDSSNQEER		2	0	0	0	0	0
ITIH4	Inter-alpha-trypsin inhibitor heavy chain H4	ITIH4_HUMAN	50Step_Domain_p400.0_to_450.0	400	450	50.0 AA STEP	50	3	0	0	0	0	0	0.02	1	1	0	LALDNGGLAR		6	0	0	0	0	0
ITIH4	Inter-alpha-trypsin inhibitor heavy chain H4	ITIH4_HUMAN	50Step_Domain_p450.0_to_500.0	450	500	50.0 AA STEP	50	0	0	0	0	0	0	0	1	0	0			0	0	0	0	0	0
ITIH4	Inter-alpha-trypsin inhibitor heavy chain H4	ITIH4_HUMAN	50Step_Domain_p500.0_to_550.0	500	550	50.0 AA STEP	50	4	4	0	0	0	0	0.06	1	3	0	GPDVLTATVSGK GPDVLTATVSGK LWAYLTIQQLLEQTVSASDADQQALR		8	4	0	0	0	0
ITIH4	Inter-alpha-trypsin inhibitor heavy chain H4	ITIH4_HUMAN	50Step_Domain_p550.0_to_600.0	550	600	50.0 AA STEP	50	0	2	0	0	0	0	0.02	1	1	0	LWAYLTIQQLLEQTVSASDADQQALR		0	2	0	0	0	0
ITIH4	Inter-alpha-trypsin inhibitor heavy chain H4	ITIH4_HUMAN	50Step_Domain_p600.0_to_650.0	600	650	50.0 AA STEP	50	3	0	0	0	0	0	0.02	1	1	0	IPKPEASFSPR		6	0	0	0	0	0
ITIH4	Inter-alpha-trypsin inhibitor heavy chain H4	ITIH4_HUMAN	50Step_Domain_p650.0_to_700.0	650	700	50.0 AA STEP	50	7	0	0	0	0	0	0.04	1	2	0	QLGLPGPPDVPDHAAYHPFR		14	0	0	0	0	0
ITIH4	Inter-alpha-trypsin inhibitor heavy chain H4	ITIH4_HUMAN	50Step_Domain_p700.0_to_750.0	700	750	50.0 AA STEP	50	0	0	0	0	0	0	0	1	0	0			0	0	0	0	0	0
ITIH4	Inter-alpha-trypsin inhibitor heavy chain H4	ITIH4_HUMAN	50Step_Domain_p750.0_to_800.0	750	800	50.0 AA STEP	50	4	15	30	0	0	0	0.32	0	16	0	NPLVWVHASPEHVVVTR QGPVNLLSDPEQGVEVTGQYER AGFSWIEVTFK NPLVWVHASPEHVVVTR QGPVNLLSDPEQGVEVTGQYER QGPVNLLSDPEQGVEVTGQYER		8	16	6	0	0	0
ITIH4	Inter-alpha-trypsin inhibitor heavy chain H4	ITIH4_HUMAN	50Step_Domain_p800.0_to_850.0	800	850	50.0 AA STEP	50	11	23	10	0	0	0	0.3	0	15	0	ETLFSVMPGLK NPLVWVHASPEHVVVTR TGLLLLSDPDK ETLFSVMPGLK NPLVWVHASPEHVVVTR TGLLLLSDPDK VTIGLLFWDGR TGLLLLSDPDK		22	24	2	0	0	0
ITIH4	Inter-alpha-trypsin inhibitor heavy chain H4	ITIH4_HUMAN	50Step_Domain_p850.0_to_900.0	850	900	50.0 AA STEP	50	9	21	0	0	0	0	0.2	0.0285	10	0	FSSHVGGTLGQFYQEVLWGSPAASDDGR FSSHVGGTLGQFYQEVLWGSPAASDDGRR FSSHVGGTLGQFYQEVLWGSPAASDDGR FSSHVGGTLGQFYQEVLWGSPAASDDGRR VTIGLLFWDGR		18	22	0	0	0	0
ITIH4	Inter-alpha-trypsin inhibitor heavy chain H4	ITIH4_HUMAN	50Step_Domain_p900.0_to_930.0	900	930	50.0 AA STEP	30	0	0	0	0	0	0	0	1	0	0			0	0	0	0	0	0
ITIH4	Inter-alpha-trypsin inhibitor heavy chain H4	ITIH4_HUMAN	80Step_Domain_p0_to_80	0	80	80.0 AA STEP	80	11	10	20	0	0	0	0.175	0.0192	14	0	ANTVQEATFQMELPK ANTVQEATFQMELPK ANTVQEATFQMELPK		22	10	4	0	0	0
ITIH4	Inter-alpha-trypsin inhibitor heavy chain H4	ITIH4_HUMAN	80Step_Domain_p80.0_to_160.0	80	160	80.0 AA STEP	80	19	14	10	0	0	0	0.175	0.012	14	0	AEAQAQYSAAVAK LGVYELLLK NMEQFQVSVSVAPNAK ITFELVYEELLK LGVYELLLK NMEQFQVSVSVAPNAK AEAQAQYSAAVAK		38	14	2	0	0	0
ITIH4	Inter-alpha-trypsin inhibitor heavy chain H4	ITIH4_HUMAN	80Step_Domain_p160.0_to_240.0	160	240	80.0 AA STEP	80	14	8	10	0	0	0	0.1375	0.144	11	0	LGVYELLLK SPEQQETVLDGNLIIR LGVYELLLK SPEQQETVLDGNLIIR SPEQQETVLDGNLIIR		28	8	2	0	0	0
ITIH4	Inter-alpha-trypsin inhibitor heavy chain H4	ITIH4_HUMAN	80Step_Domain_p240.0_to_320.0	240	320	80.0 AA STEP	80	11	8	10	0	0	0	0.125	0.264	10	0	AISGGSIQIENGYFVHYFAPEGLTTMPK DQFNLIVFSTEATQWRPSLVPASAENVNK ILDDLSPR NVVFVIDK DQFNLIVFSTEATQWRPSLVPASAENVNK ILDDLSPR NVVFVIDK ILDDLSPR		22	8	2	0	0	0
ITIH4	Inter-alpha-trypsin inhibitor heavy chain H4	ITIH4_HUMAN	80Step_Domain_p320.0_to_400.0	320	400	80.0 AA STEP	80	2	2	0	0	0	0	0.0125	1	1	0	DQFNLIVFSTEATQWRPSLVPASAENVNK SFAAGIQALGGTNINDAMLMAVQLLDSSNQEER DQFNLIVFSTEATQWRPSLVPASAENVNK		4	2	0	0	0	0
ITIH4	Inter-alpha-trypsin inhibitor heavy chain H4	ITIH4_HUMAN	80Step_Domain_p400.0_to_480.0	400	480	80.0 AA STEP	80	3	0	0	0	0	0	0.0125	1	1	0	LALDNGGLAR		6	0	0	0	0	0
ITIH4	Inter-alpha-trypsin inhibitor heavy chain H4	ITIH4_HUMAN	80Step_Domain_p480.0_to_560.0	480	560	80.0 AA STEP	80	4	4	0	0	0	0	0.0375	1	3	0	GPDVLTATVSGK GPDVLTATVSGK LWAYLTIQQLLEQTVSASDADQQALR		8	4	0	0	0	0
ITIH4	Inter-alpha-trypsin inhibitor heavy chain H4	ITIH4_HUMAN	80Step_Domain_p560.0_to_640.0	560	640	80.0 AA STEP	80	3	2	0	0	0	0	0.025	1	2	0	IPKPEASFSPR LWAYLTIQQLLEQTVSASDADQQALR		6	2	0	0	0	0
ITIH4	Inter-alpha-trypsin inhibitor heavy chain H4	ITIH4_HUMAN	80Step_Domain_p640.0_to_720.0	640	720	80.0 AA STEP	80	10	0	0	0	0	0	0.0375	1	3	0	IPKPEASFSPR QLGLPGPPDVPDHAAYHPFR		20	0	0	0	0	0
ITIH4	Inter-alpha-trypsin inhibitor heavy chain H4	ITIH4_HUMAN	80Step_Domain_p720.0_to_800.0	720	800	80.0 AA STEP	80	4	15	30	0	0	0	0.2	0.0024	16	0	NPLVWVHASPEHVVVTR QGPVNLLSDPEQGVEVTGQYER AGFSWIEVTFK NPLVWVHASPEHVVVTR QGPVNLLSDPEQGVEVTGQYER QGPVNLLSDPEQGVEVTGQYER		8	16	6	0	0	0
ITIH4	Inter-alpha-trypsin inhibitor heavy chain H4	ITIH4_HUMAN	80Step_Domain_p800.0_to_880.0	800	880	80.0 AA STEP	80	20	41	10	0	0	0	0.3	0	24	0	ETLFSVMPGLK FSSHVGGTLGQFYQEVLWGSPAASDDGR FSSHVGGTLGQFYQEVLWGSPAASDDGRR NPLVWVHASPEHVVVTR TGLLLLSDPDK ETLFSVMPGLK FSSHVGGTLGQFYQEVLWGSPAASDDGR FSSHVGGTLGQFYQEVLWGSPAASDDGRR NPLVWVHASPEHVVVTR TGLLLLSDPDK VTIGLLFWDGR TGLLLLSDPDK		40	42	2	0	0	0
ITIH4	Inter-alpha-trypsin inhibitor heavy chain H4	ITIH4_HUMAN	80Step_Domain_p880.0_to_930.0	880	930	80.0 AA STEP	50	9	17	0	0	0	0	0.18	0.4692	9	0	FSSHVGGTLGQFYQEVLWGSPAASDDGR FSSHVGGTLGQFYQEVLWGSPAASDDGRR FSSHVGGTLGQFYQEVLWGSPAASDDGR FSSHVGGTLGQFYQEVLWGSPAASDDGRR		18	18	0	0	0	0
ITIH4	Inter-alpha-trypsin inhibitor heavy chain H4	ITIH4_HUMAN	100Step_Domain_p0_to_100	0	100	100.0 AA STEP	100	15	10	30	0	0	0	0.18	0.003	18	0	AEAQAQYSAAVAK ANTVQEATFQMELPK ANTVQEATFQMELPK AEAQAQYSAAVAK ANTVQEATFQMELPK		30	10	6	0	0	0
ITIH4	Inter-alpha-trypsin inhibitor heavy chain H4	ITIH4_HUMAN	100Step_Domain_p100.0_to_200.0	100	200	100.0 AA STEP	100	19	14	10	0	0	0	0.14	0.034	14	0	AEAQAQYSAAVAK LGVYELLLK NMEQFQVSVSVAPNAK ITFELVYEELLK LGVYELLLK NMEQFQVSVSVAPNAK AEAQAQYSAAVAK		38	14	2	0	0	0
ITIH4	Inter-alpha-trypsin inhibitor heavy chain H4	ITIH4_HUMAN	100Step_Domain_p200.0_to_300.0	200	300	100.0 AA STEP	100	18	8	20	0	0	0	0.15	0.019	15	0	AISGGSIQIENGYFVHYFAPEGLTTMPK ILDDLSPR NVVFVIDK SPEQQETVLDGNLIIR ILDDLSPR NVVFVIDK SPEQQETVLDGNLIIR ILDDLSPR SPEQQETVLDGNLIIR		36	8	4	0	0	0
ITIH4	Inter-alpha-trypsin inhibitor heavy chain H4	ITIH4_HUMAN	100Step_Domain_p300.0_to_400.0	300	400	100.0 AA STEP	100	7	6	10	0	0	0	0.08	1	8	0	DQFNLIVFSTEATQWRPSLVPASAENVNK ILDDLSPR SFAAGIQALGGTNINDAMLMAVQLLDSSNQEER DQFNLIVFSTEATQWRPSLVPASAENVNK ILDDLSPR ILDDLSPR		14	6	2	0	0	0
ITIH4	Inter-alpha-trypsin inhibitor heavy chain H4	ITIH4_HUMAN	100Step_Domain_p400.0_to_500.0	400	500	100.0 AA STEP	100	3	0	0	0	0	0	0.01	1	1	0	LALDNGGLAR		6	0	0	0	0	0
ITIH4	Inter-alpha-trypsin inhibitor heavy chain H4	ITIH4_HUMAN	100Step_Domain_p500.0_to_600.0	500	600	100.0 AA STEP	100	4	4	0	0	0	0	0.03	1	3	0	GPDVLTATVSGK GPDVLTATVSGK LWAYLTIQQLLEQTVSASDADQQALR		8	4	0	0	0	0
ITIH4	Inter-alpha-trypsin inhibitor heavy chain H4	ITIH4_HUMAN	100Step_Domain_p600.0_to_700.0	600	700	100.0 AA STEP	100	10	0	0	0	0	0	0.03	1	3	0	IPKPEASFSPR QLGLPGPPDVPDHAAYHPFR		20	0	0	0	0	0
ITIH4	Inter-alpha-trypsin inhibitor heavy chain H4	ITIH4_HUMAN	100Step_Domain_p700.0_to_800.0	700	800	100.0 AA STEP	100	4	15	30	0	0	0	0.16	0.01	16	0	NPLVWVHASPEHVVVTR QGPVNLLSDPEQGVEVTGQYER AGFSWIEVTFK NPLVWVHASPEHVVVTR QGPVNLLSDPEQGVEVTGQYER QGPVNLLSDPEQGVEVTGQYER		8	16	6	0	0	0
ITIH4	Inter-alpha-trypsin inhibitor heavy chain H4	ITIH4_HUMAN	100Step_Domain_p800.0_to_900.0	800	900	100.0 AA STEP	100	20	41	10	0	0	0	0.24	0	24	0	ETLFSVMPGLK FSSHVGGTLGQFYQEVLWGSPAASDDGR FSSHVGGTLGQFYQEVLWGSPAASDDGRR NPLVWVHASPEHVVVTR TGLLLLSDPDK ETLFSVMPGLK FSSHVGGTLGQFYQEVLWGSPAASDDGR FSSHVGGTLGQFYQEVLWGSPAASDDGRR NPLVWVHASPEHVVVTR TGLLLLSDPDK VTIGLLFWDGR TGLLLLSDPDK		40	42	2	0	0	0
ITIH4	Inter-alpha-trypsin inhibitor heavy chain H4	ITIH4_HUMAN	100Step_Domain_p900.0_to_930.0	900	930	100.0 AA STEP	30	0	0	0	0	0	0	0	1	0	0			0	0	0	0	0	0
SERPIND1	Heparin cofactor 2	HEP2_HUMAN	1	73	83	REPEAT	10	0	0	0	0	0	0	0	1	0	0			0	0	0	0	0	0
SERPIND1	Heparin cofactor 2	HEP2_HUMAN	2	87	97	REPEAT	10	0	0	0	0	0	0	0	1	0	0			0	0	0	0	0	0
SERPIND1	Heparin cofactor 2	HEP2_HUMAN	Chemotactic activity	68	79	REGIONS	11	0	0	0	0	0	0	0	1	0	0			0	0	0	0	0	0
SERPIND1	Heparin cofactor 2	HEP2_HUMAN	Glycosaminoglycan-binding site	192	212	REGIONS	20	5	4	0	0	0	0	0.15	0.048	3	0	YEITTIHNLFR YEITTIHNLFR		10	6	0	0	0	0
SERPIND1	Heparin cofactor 2	HEP2_HUMAN	50Step_Domain_p0_to_50	0	50	50.0 AA STEP	50	4	1	0	0	0	0	0.04	1	2	0	GGETAQSADPQWEQLNNK GPLDQLEK GPLDQLEK		8	2	0	0	0	0
SERPIND1	Heparin cofactor 2	HEP2_HUMAN	50Step_Domain_p50.0_to_100.0	50	100	50.0 AA STEP	50	0	0	0	0	0	0	0	1	0	0			0	0	0	0	0	0
SERPIND1	Heparin cofactor 2	HEP2_HUMAN	50Step_Domain_p100.0_to_150.0	100	150	50.0 AA STEP	50	0	0	0	0	0	0	0	1	0	0			0	0	0	0	0	0
SERPIND1	Heparin cofactor 2	HEP2_HUMAN	50Step_Domain_p150.0_to_200.0	150	200	50.0 AA STEP	50	5	4	0	0	0	0	0.06	1	3	0	YEITTIHNLFR YEITTIHNLFR		10	6	0	0	0	0
SERPIND1	Heparin cofactor 2	HEP2_HUMAN	50Step_Domain_p200.0_to_250.0	200	250	50.0 AA STEP	50	12	18	0	0	0	0	0.2	0	10	0	EYYFAEAQIADFSDPAFISK QFPILLDFK YEITTIHNLFR EYYFAEAQIADFSDPAFISK QFPILLDFK SVNDLYIQK YEITTIHNLFR		24	26	0	0	0	0
SERPIND1	Heparin cofactor 2	HEP2_HUMAN	50Step_Domain_p250.0_to_300.0	250	300	50.0 AA STEP	50	4	4	0	0	0	0	0.06	1	3	0	EYYFAEAQIADFSDPAFISK EYYFAEAQIADFSDPAFISK		8	6	0	0	0	0
SERPIND1	Heparin cofactor 2	HEP2_HUMAN	50Step_Domain_p300.0_to_350.0	300	350	50.0 AA STEP	50	1	1	0	0	0	0	0.02	1	1	0	FPVEMTHNHNFR FPVEMTHNHNFR		2	2	0	0	0	0
SERPIND1	Heparin cofactor 2	HEP2_HUMAN	50Step_Domain_p350.0_to_400.0	350	400	50.0 AA STEP	50	1	1	0	0	0	0	0.02	1	1	0	TLEAQLTPR TLEAQLTPR		2	2	0	0	0	0
SERPIND1	Heparin cofactor 2	HEP2_HUMAN	50Step_Domain_p400.0_to_450.0	400	450	50.0 AA STEP	50	7	3	0	0	0	0	0.06	1	3	0	HQGTITVNEEGTQATTVTTVGFMPLSTQVR NYNLVESLK HQGTITVNEEGTQATTVTTVGFMPLSTQVR		14	4	0	0	0	0
SERPIND1	Heparin cofactor 2	HEP2_HUMAN	50Step_Domain_p450.0_to_499.0	450	499	50.0 AA STEP	49	6	3	0	0	0	0	0.0612245	1	3	0	HQGTITVNEEGTQATTVTTVGFMPLSTQVR HQGTITVNEEGTQATTVTTVGFMPLSTQVR		12	4	0	0	0	0
SERPIND1	Heparin cofactor 2	HEP2_HUMAN	80Step_Domain_p0_to_80	0	80	80.0 AA STEP	80	4	1	0	0	0	0	0.025	1	2	0	GGETAQSADPQWEQLNNK GPLDQLEK GPLDQLEK		8	2	0	0	0	0
SERPIND1	Heparin cofactor 2	HEP2_HUMAN	80Step_Domain_p80.0_to_160.0	80	160	80.0 AA STEP	80	0	0	0	0	0	0	0	1	0	0			0	0	0	0	0	0
SERPIND1	Heparin cofactor 2	HEP2_HUMAN	80Step_Domain_p160.0_to_240.0	160	240	80.0 AA STEP	80	8	14	0	0	0	0	0.0875	0.0042	7	0	QFPILLDFK YEITTIHNLFR QFPILLDFK SVNDLYIQK YEITTIHNLFR		16	20	0	0	0	0
SERPIND1	Heparin cofactor 2	HEP2_HUMAN	80Step_Domain_p240.0_to_320.0	240	320	80.0 AA STEP	80	5	6	0	0	0	0	0.05	0.4564	4	0	EYYFAEAQIADFSDPAFISK FPVEMTHNHNFR EYYFAEAQIADFSDPAFISK FPVEMTHNHNFR		10	8	0	0	0	0
SERPIND1	Heparin cofactor 2	HEP2_HUMAN	80Step_Domain_p320.0_to_400.0	320	400	80.0 AA STEP	80	1	1	0	0	0	0	0.0125	1	1	0	TLEAQLTPR TLEAQLTPR		2	2	0	0	0	0
SERPIND1	Heparin cofactor 2	HEP2_HUMAN	80Step_Domain_p400.0_to_480.0	400	480	80.0 AA STEP	80	7	3	0	0	0	0	0.0375	0.644	3	0	HQGTITVNEEGTQATTVTTVGFMPLSTQVR NYNLVESLK HQGTITVNEEGTQATTVTTVGFMPLSTQVR		14	4	0	0	0	0
SERPIND1	Heparin cofactor 2	HEP2_HUMAN	80Step_Domain_p480.0_to_499.0	480	499	80.0 AA STEP	19	0	0	0	0	0	0	0	1	0	0			0	0	0	0	0	0
SERPIND1	Heparin cofactor 2	HEP2_HUMAN	100Step_Domain_p0_to_100	0	100	100.0 AA STEP	100	4	1	0	0	0	0	0.02	1	2	0	GGETAQSADPQWEQLNNK GPLDQLEK GPLDQLEK		8	2	0	0	0	0
SERPIND1	Heparin cofactor 2	HEP2_HUMAN	100Step_Domain_p100.0_to_200.0	100	200	100.0 AA STEP	100	5	4	0	0	0	0	0.03	1	3	0	YEITTIHNLFR YEITTIHNLFR		10	6	0	0	0	0
SERPIND1	Heparin cofactor 2	HEP2_HUMAN	100Step_Domain_p200.0_to_300.0	200	300	100.0 AA STEP	100	12	18	0	0	0	0	0.1	0.007	10	0	EYYFAEAQIADFSDPAFISK QFPILLDFK YEITTIHNLFR EYYFAEAQIADFSDPAFISK QFPILLDFK SVNDLYIQK YEITTIHNLFR		24	26	0	0	0	0
SERPIND1	Heparin cofactor 2	HEP2_HUMAN	100Step_Domain_p300.0_to_400.0	300	400	100.0 AA STEP	100	2	3	0	0	0	0	0.02	1	2	0	FPVEMTHNHNFR TLEAQLTPR FPVEMTHNHNFR TLEAQLTPR		4	4	0	0	0	0
SERPIND1	Heparin cofactor 2	HEP2_HUMAN	100Step_Domain_p400.0_to_499.0	400	499	100.0 AA STEP	99	7	3	0	0	0	0	0.030303	1	3	0	HQGTITVNEEGTQATTVTTVGFMPLSTQVR NYNLVESLK HQGTITVNEEGTQATTVTTVGFMPLSTQVR		14	4	0	0	0	0
SERPINA7	Thyroxine-binding globulin	THBG_HUMAN	50Step_Domain_p0_to_50	0	50	50.0 AA STEP	50	1	0	0	0	0	0	0	1	0	0	MSSINADFAFNLYR		2	0	0	0	0	0
SERPINA7	Thyroxine-binding globulin	THBG_HUMAN	50Step_Domain_p50.0_to_100.0	50	100	50.0 AA STEP	50	1	0	0	0	0	0	0	1	0	0	MSSINADFAFNLYR		2	0	0	0	0	0
SERPINA7	Thyroxine-binding globulin	THBG_HUMAN	50Step_Domain_p100.0_to_150.0	100	150	50.0 AA STEP	50	0	0	0	0	0	0	0	1	0	0			0	0	0	0	0	0
SERPINA7	Thyroxine-binding globulin	THBG_HUMAN	50Step_Domain_p150.0_to_200.0	150	200	50.0 AA STEP	50	0	0	0	0	0	0	0	1	0	0			0	0	0	0	0	0
SERPINA7	Thyroxine-binding globulin	THBG_HUMAN	50Step_Domain_p200.0_to_250.0	200	250	50.0 AA STEP	50	3	2	0	0	0	0	0.04	0.3006	2	0	AQWANPFDPSK TEDSSSFLIDK TEDSSSFLIDK		6	2	0	0	0	0
SERPINA7	Thyroxine-binding globulin	THBG_HUMAN	50Step_Domain_p250.0_to_300.0	250	300	50.0 AA STEP	50	3	6	0	0	0	0	0.06	0.0027	3	0	EGQMESVEAAMSSK EGQMESVEAAMSSK GWVDLFVPK NALALFVLPK		6	8	0	0	0	0
SERPINA7	Thyroxine-binding globulin	THBG_HUMAN	50Step_Domain_p300.0_to_350.0	300	350	50.0 AA STEP	50	1	3	0	0	0	0	0.02	0.7677	1	0	FSISATYDLGATLLK GWVDLFVPK		2	4	0	0	0	0
SERPINA7	Thyroxine-binding globulin	THBG_HUMAN	50Step_Domain_p350.0_to_400.0	350	400	50.0 AA STEP	50	1	2	0	0	0	0	0.02	1	1	0	GTEAAAVPEVELSDQPENTFLHPIIQIDR GTEAAAVPEVELSDQPENTFLHPIIQIDR		2	2	0	0	0	0
SERPINA7	Thyroxine-binding globulin	THBG_HUMAN	50Step_Domain_p400.0_to_415.0	400	415	50.0 AA STEP	15	0	0	0	0	0	0	0	1	0	0			0	0	0	0	0	0
SERPINA7	Thyroxine-binding globulin	THBG_HUMAN	80Step_Domain_p0_to_80	0	80	80.0 AA STEP	80	1	0	0	0	0	0	0	1	0	0	MSSINADFAFNLYR		2	0	0	0	0	0
SERPINA7	Thyroxine-binding globulin	THBG_HUMAN	80Step_Domain_p80.0_to_160.0	80	160	80.0 AA STEP	80	0	0	0	0	0	0	0	1	0	0			0	0	0	0	0	0
SERPINA7	Thyroxine-binding globulin	THBG_HUMAN	80Step_Domain_p160.0_to_240.0	160	240	80.0 AA STEP	80	3	2	0	0	0	0	0.025	0.3882	2	0	AQWANPFDPSK TEDSSSFLIDK TEDSSSFLIDK		6	2	0	0	0	0
SERPINA7	Thyroxine-binding globulin	THBG_HUMAN	80Step_Domain_p240.0_to_320.0	240	320	80.0 AA STEP	80	4	6	0	0	0	0	0.0375	0.0042	3	0	EGQMESVEAAMSSK FSISATYDLGATLLK EGQMESVEAAMSSK GWVDLFVPK NALALFVLPK		8	8	0	0	0	0
SERPINA7	Thyroxine-binding globulin	THBG_HUMAN	80Step_Domain_p320.0_to_400.0	320	400	80.0 AA STEP	80	2	2	0	0	0	0	0.0125	0.8064	1	0	FSISATYDLGATLLK GTEAAAVPEVELSDQPENTFLHPIIQIDR GTEAAAVPEVELSDQPENTFLHPIIQIDR		4	2	0	0	0	0
SERPINA7	Thyroxine-binding globulin	THBG_HUMAN	80Step_Domain_p400.0_to_415.0	400	415	80.0 AA STEP	15	0	0	0	0	0	0	0	1	0	0			0	0	0	0	0	0
SERPINA7	Thyroxine-binding globulin	THBG_HUMAN	100Step_Domain_p0_to_100	0	100	100.0 AA STEP	100	1	0	0	0	0	0	0	1	0	0	MSSINADFAFNLYR		2	0	0	0	0	0
SERPINA7	Thyroxine-binding globulin	THBG_HUMAN	100Step_Domain_p100.0_to_200.0	100	200	100.0 AA STEP	100	0	0	0	0	0	0	0	1	0	0			0	0	0	0	0	0
SERPINA7	Thyroxine-binding globulin	THBG_HUMAN	100Step_Domain_p200.0_to_300.0	200	300	100.0 AA STEP	100	6	8	0	0	0	0	0.05	0.0075	5	0	AQWANPFDPSK EGQMESVEAAMSSK TEDSSSFLIDK EGQMESVEAAMSSK GWVDLFVPK NALALFVLPK TEDSSSFLIDK		12	10	0	0	0	0
SERPINA7	Thyroxine-binding globulin	THBG_HUMAN	100Step_Domain_p300.0_to_400.0	300	400	100.0 AA STEP	100	2	5	0	0	0	0	0.02	0.3995	2	0	FSISATYDLGATLLK GTEAAAVPEVELSDQPENTFLHPIIQIDR GTEAAAVPEVELSDQPENTFLHPIIQIDR GWVDLFVPK		4	6	0	0	0	0
SERPINA7	Thyroxine-binding globulin	THBG_HUMAN	100Step_Domain_p400.0_to_415.0	400	415	100.0 AA STEP	15	0	0	0	0	0	0	0	1	0	0			0	0	0	0	0	0
CPNE3	Copine-3	CPNE3_HUMAN	C2 1	1	115	DOMAINS	114	0	0	0	0	0	0	0	1	0	0			0	0	0	0	0	0
CPNE3	Copine-3	CPNE3_HUMAN	C2 2	124	247	DOMAINS	123	1	0	0	0	0	0	0	1	0	0	VVLFEMEAR		2	0	0	0	0	0
CPNE3	Copine-3	CPNE3_HUMAN	VWFA	291	513	DOMAINS	222	1	2	0	0	0	0	0.0045045	0.0699	1	0	DIVQFVPFR DIVQFVPFR SPLGEVAIR		2	4	0	0	0	0
CPNE3	Copine-3	CPNE3_HUMAN	50Step_Domain_p0_to_50	0	50	50.0 AA STEP	50	0	0	0	0	0	0	0	1	0	0			0	0	0	0	0	0
CPNE3	Copine-3	CPNE3_HUMAN	50Step_Domain_p50.0_to_100.0	50	100	50.0 AA STEP	50	0	0	0	0	0	0	0	1	0	0			0	0	0	0	0	0
CPNE3	Copine-3	CPNE3_HUMAN	50Step_Domain_p100.0_to_150.0	100	150	50.0 AA STEP	50	1	0	0	0	0	0	0	1	0	0	VVLFEMEAR		2	0	0	0	0	0
CPNE3	Copine-3	CPNE3_HUMAN	50Step_Domain_p150.0_to_200.0	150	200	50.0 AA STEP	50	0	0	0	0	0	0	0	1	0	0			0	0	0	0	0	0
CPNE3	Copine-3	CPNE3_HUMAN	50Step_Domain_p200.0_to_250.0	200	250	50.0 AA STEP	50	0	0	0	0	0	0	0	1	0	0			0	0	0	0	0	0
CPNE3	Copine-3	CPNE3_HUMAN	50Step_Domain_p250.0_to_300.0	250	300	50.0 AA STEP	50	0	0	0	0	0	0	0	1	0	0			0	0	0	0	0	0
CPNE3	Copine-3	CPNE3_HUMAN	50Step_Domain_p300.0_to_350.0	300	350	50.0 AA STEP	50	0	0	0	0	0	0	0	1	0	0			0	0	0	0	0	0
CPNE3	Copine-3	CPNE3_HUMAN	50Step_Domain_p350.0_to_400.0	350	400	50.0 AA STEP	50	0	0	0	0	0	0	0	1	0	0			0	0	0	0	0	0
CPNE3	Copine-3	CPNE3_HUMAN	50Step_Domain_p400.0_to_450.0	400	450	50.0 AA STEP	50	0	0	0	0	0	0	0	1	0	0			0	0	0	0	0	0
CPNE3	Copine-3	CPNE3_HUMAN	50Step_Domain_p450.0_to_500.0	450	500	50.0 AA STEP	50	1	2	0	0	0	0	0.02	0	1	0	DIVQFVPFR DIVQFVPFR SPLGEVAIR		2	4	0	0	0	0
CPNE3	Copine-3	CPNE3_HUMAN	50Step_Domain_p500.0_to_537.0	500	537	50.0 AA STEP	37	0	0	0	0	0	0	0	1	0	0			0	0	0	0	0	0
CPNE3	Copine-3	CPNE3_HUMAN	80Step_Domain_p0_to_80	0	80	80.0 AA STEP	80	0	0	0	0	0	0	0	1	0	0			0	0	0	0	0	0
CPNE3	Copine-3	CPNE3_HUMAN	80Step_Domain_p80.0_to_160.0	80	160	80.0 AA STEP	80	1	0	0	0	0	0	0	1	0	0	VVLFEMEAR		2	0	0	0	0	0
CPNE3	Copine-3	CPNE3_HUMAN	80Step_Domain_p160.0_to_240.0	160	240	80.0 AA STEP	80	0	0	0	0	0	0	0	1	0	0			0	0	0	0	0	0
CPNE3	Copine-3	CPNE3_HUMAN	80Step_Domain_p240.0_to_320.0	240	320	80.0 AA STEP	80	0	0	0	0	0	0	0	1	0	0			0	0	0	0	0	0
CPNE3	Copine-3	CPNE3_HUMAN	80Step_Domain_p320.0_to_400.0	320	400	80.0 AA STEP	80	0	0	0	0	0	0	0	1	0	0			0	0	0	0	0	0
CPNE3	Copine-3	CPNE3_HUMAN	80Step_Domain_p400.0_to_480.0	400	480	80.0 AA STEP	80	0	1	0	0	0	0	0	1	0	0	SPLGEVAIR		0	2	0	0	0	0
CPNE3	Copine-3	CPNE3_HUMAN	80Step_Domain_p480.0_to_537.0	480	537	80.0 AA STEP	57	1	2	0	0	0	0	0.0175439	0.0098	1	0	DIVQFVPFR DIVQFVPFR SPLGEVAIR		2	4	0	0	0	0
CPNE3	Copine-3	CPNE3_HUMAN	100Step_Domain_p0_to_100	0	100	100.0 AA STEP	100	0	0	0	0	0	0	0	1	0	0			0	0	0	0	0	0
CPNE3	Copine-3	CPNE3_HUMAN	100Step_Domain_p100.0_to_200.0	100	200	100.0 AA STEP	100	1	0	0	0	0	0	0	1	0	0	VVLFEMEAR		2	0	0	0	0	0
CPNE3	Copine-3	CPNE3_HUMAN	100Step_Domain_p200.0_to_300.0	200	300	100.0 AA STEP	100	0	0	0	0	0	0	0	1	0	0			0	0	0	0	0	0
CPNE3	Copine-3	CPNE3_HUMAN	100Step_Domain_p300.0_to_400.0	300	400	100.0 AA STEP	100	0	0	0	0	0	0	0	1	0	0			0	0	0	0	0	0
CPNE3	Copine-3	CPNE3_HUMAN	100Step_Domain_p400.0_to_500.0	400	500	100.0 AA STEP	100	1	2	0	0	0	0	0.01	0.0072	1	0	DIVQFVPFR DIVQFVPFR SPLGEVAIR		2	4	0	0	0	0
CPNE3	Copine-3	CPNE3_HUMAN	100Step_Domain_p500.0_to_537.0	500	537	100.0 AA STEP	37	0	0	0	0	0	0	0	1	0	0			0	0	0	0	0	0
C4A	C4a anaphylatoxin	A0A0G2JPR0_HUMAN	Anaphylatoxin-like	702	736	DOMAINS	34	0	0	0	0	0	0	0	1	0	0			0	0	0	0	0	0
C4A	C4a anaphylatoxin	A0A0G2JPR0_HUMAN	NTR	1595	1742	DOMAINS	147	3	0	8	7	0	12	-0.0136054	0.7888	4	6	VEYGFQVK GLQDEDGYR	VEYGFQVK GLQDEDGYR	6	0	2	2	0	2
C4A	C4a anaphylatoxin	A0A0G2JPR0_HUMAN	50Step_Domain_p0_to_50	0	50	50.0 AA STEP	50	0	0	0	0	0	0	0	1	0	0			0	0	0	0	0	0
C4A	C4a anaphylatoxin	A0A0G2JPR0_HUMAN	50Step_Domain_p50.0_to_100.0	50	100	50.0 AA STEP	50	4	3	0	0	0	0	0.04	1	2	0	DFALLSLQVPLK VDFTLSSER VDFTLSSER		8	2	0	0	0	0
C4A	C4a anaphylatoxin	A0A0G2JPR0_HUMAN	50Step_Domain_p100.0_to_150.0	100	150	50.0 AA STEP	50	11	13	0	7	17	0	0	1	8	8	GHLFLQTDQPIYNPGQR GPEVQLVAHSPWLK TTNIQGINLLFSSR GHLFLQTDQPIYNPGQR GPEVQLVAHSPWLK TTNIQGINLLFSSR	TTNIQGINLLFSSR TTNIQGINLLFSSR	20	8	0	2	2	0
C4A	C4a anaphylatoxin	A0A0G2JPR0_HUMAN	50Step_Domain_p150.0_to_200.0	150	200	50.0 AA STEP	50	16	7	0	0	0	0	0.16	1	8	0	EVYMPSSIFQDDFVIPDISEPGTWK GHLFLQTDQPIYNPGQR MRPSTDTITVMVENSHGLR GHLFLQTDQPIYNPGQR		30	4	0	0	0	0
C4A	C4a anaphylatoxin	A0A0G2JPR0_HUMAN	50Step_Domain_p200.0_to_250.0	200	250	50.0 AA STEP	50	11	0	0	7	0	0	0.04	1	4	2	EVYMPSSIFQDDFVIPDISEPGTWK ITPGKPYILTVPGHLDEMQLDIQAR YVLPNFEVK	YVLPNFEVK	20	0	0	2	0	0
C4A	C4a anaphylatoxin	A0A0G2JPR0_HUMAN	50Step_Domain_p250.0_to_300.0	250	300	50.0 AA STEP	50	8	3	0	0	0	0	0.08	1	4	0	FGLLDEDGK FGLLDEDGKK ITPGKPYILTVPGHLDEMQLDIQAR FGLLDEDGK		16	2	0	0	0	0
C4A	C4a anaphylatoxin	A0A0G2JPR0_HUMAN	50Step_Domain_p300.0_to_350.0	300	350	50.0 AA STEP	50	10	17	24	13	34	12	-0.06	1	17	20	AEFQDALEK LNMGITDLQGLR LVNGQSHISLSK AEFQDALEK LNMGITDLQGLR AEFQDALEK LNMGITDLQGLR	LNMGITDLQGLR LNMGITDLQGLR AEFQDALEK	18	10	6	4	4	2
C4A	C4a anaphylatoxin	A0A0G2JPR0_HUMAN	50Step_Domain_p350.0_to_400.0	350	400	50.0 AA STEP	50	3	7	0	7	0	0	0.02	1	3	2	EMSGSPASGIPVK EMSGSPASGIPVK HLVPGAPFLLQALVR	HLVPGAPFLLQALVR	6	4	0	2	0	0
C4A	C4a anaphylatoxin	A0A0G2JPR0_HUMAN	50Step_Domain_p400.0_to_450.0	400	450	50.0 AA STEP	50	3	3	0	0	0	0	0.04	1	2	0	EMSGSPASGIPVK EMSGSPASGIPVK		6	2	0	0	0	0
C4A	C4a anaphylatoxin	A0A0G2JPR0_HUMAN	50Step_Domain_p450.0_to_500.0	450	500	50.0 AA STEP	50	2	3	0	0	17	0	-0.08	1	2	6	VGDTLNLNLR VGDTLNLNLR	VGDTLNLNLR	4	2	0	0	2	0
C4A	C4a anaphylatoxin	A0A0G2JPR0_HUMAN	50Step_Domain_p500.0_to_550.0	500	550	50.0 AA STEP	50	0	0	0	0	0	0	0	1	0	0			0	0	0	0	0	0
C4A	C4a anaphylatoxin	A0A0G2JPR0_HUMAN	50Step_Domain_p550.0_to_600.0	550	600	50.0 AA STEP	50	5	7	16	0	0	25	0.02	1	9	8	LELSVDGAK LHLETDSLALVALGALDTALYAAGSK LELSVDGAK	LELSVDGAK	10	4	4	0	0	4
C4A	C4a anaphylatoxin	A0A0G2JPR0_HUMAN	50Step_Domain_p600.0_to_650.0	600	650	50.0 AA STEP	50	0	7	0	0	0	0	0.04	1	2	0	LHLETDSLALVALGALDTALYAAGSK		0	4	0	0	0	0
C4A	C4a anaphylatoxin	A0A0G2JPR0_HUMAN	50Step_Domain_p650.0_to_700.0	650	700	50.0 AA STEP	50	0	0	0	0	0	12	-0.08	1	0	4		LGQYASPTAK	0	0	0	0	0	2
C4A	C4a anaphylatoxin	A0A0G2JPR0_HUMAN	50Step_Domain_p700.0_to_750.0	700	750	50.0 AA STEP	50	0	0	0	0	0	0	0	1	0	0			0	0	0	0	0	0
C4A	C4a anaphylatoxin	A0A0G2JPR0_HUMAN	50Step_Domain_p750.0_to_800.0	750	800	50.0 AA STEP	50	10	13	8	20	17	0	-0.04	1	10	12	ALEILQEEDLIDEDDIPVR ALEILQEEDLIDEDDIPVR SFFPENWLWR ALEILQEEDLIDEDDIPVR	ALEILQEEDLIDEDDIPVR ALEILQEEDLIDEDDIPVR	18	8	2	6	2	0
C4A	C4a anaphylatoxin	A0A0G2JPR0_HUMAN	50Step_Domain_p800.0_to_850.0	800	850	50.0 AA STEP	50	3	0	0	0	0	0	0.02	1	1	0	FEQLELRPVLYNYLDK		6	0	0	0	0	0
C4A	C4a anaphylatoxin	A0A0G2JPR0_HUMAN	50Step_Domain_p850.0_to_900.0	850	900	50.0 AA STEP	50	3	0	0	0	0	0	0.02	1	1	0	FEQLELRPVLYNYLDK		6	0	0	0	0	0
C4A	C4a anaphylatoxin	A0A0G2JPR0_HUMAN	50Step_Domain_p900.0_to_950.0	900	950	50.0 AA STEP	50	6	7	8	13	0	25	-0.12	1	7	13	EELVYELNPLDHR EGAIHREELVYELNPLDHR GSFEFPVGDAVSK EELVYELNPLDHR EGAIHREELVYELNPLDHR EELVYELNPLDHR	EELVYELNPLDHR EELVYELNPLDHR	12	4	2	4	0	4
C4A	C4a anaphylatoxin	A0A0G2JPR0_HUMAN	50Step_Domain_p950.0_to_1000.0	950	1000	50.0 AA STEP	50	15	23	32	46	34	50	-0.4	0	23	43	EELVYELNPLDHR EGAIHREELVYELNPLDHR VTASDPLDTLGSEGALSPGGVASLLR EELVYELNPLDHR EGAIHREELVYELNPLDHR VTASDPLDTLGSEGALSPGGVASLLR EELVYELNPLDHR VTASDPLDTLGSEGALSPGGVASLLR	EELVYELNPLDHR TLEIPGNSDPNMIPDGDFNSYVR VTASDPLDTLGSEGALSPGGVASLLR VTASDPLDTLGSEGALSPGGVASLLR EELVYELNPLDHR VTASDPLDTLGSEGALSPGGVASLLR	28	14	8	14	4	8
C4A	C4a anaphylatoxin	A0A0G2JPR0_HUMAN	50Step_Domain_p1000.0_to_1050.0	1000	1050	50.0 AA STEP	50	27	17	24	20	34	25	-0.06	1	23	26	DHAVDLIQK GCGEQTMIYLAPTLAASR TEQWSTLPPETK VTASDPLDTLGSEGALSPGGVASLLR VTASDPLDTLGSEGALSPGGVASLLR VTASDPLDTLGSEGALSPGGVASLLR	DHAVDLIQK VTASDPLDTLGSEGALSPGGVASLLR VTASDPLDTLGSEGALSPGGVASLLR VTASDPLDTLGSEGALSPGGVASLLR	50	10	6	6	4	4
C4A	C4a anaphylatoxin	A0A0G2JPR0_HUMAN	50Step_Domain_p1050.0_to_1100.0	1050	1100	50.0 AA STEP	50	12	20	16	13	17	12	0.04	1	16	14	ADGSYAAWLSR DHAVDLIQK DSSTWLTAFVLK VLSLAQEQVGGSPEK ADGSYAAWLSR VLSLAQEQVGGSPEK VLSLAQEQVGGSPEK	ADGSYAAWLSR DHAVDLIQK ADGSYAAWLSR VLSLAQEQVGGSPEK	22	12	4	4	2	2
C4A	C4a anaphylatoxin	A0A0G2JPR0_HUMAN	50Step_Domain_p1100.0_to_1150.0	1100	1150	50.0 AA STEP	50	0	0	0	0	0	0	0	1	0	0			0	0	0	0	0	0
C4A	C4a anaphylatoxin	A0A0G2JPR0_HUMAN	50Step_Domain_p1150.0_to_1200.0	1150	1200	50.0 AA STEP	50	0	0	0	0	0	0	0	1	0	0			0	0	0	0	0	0
C4A	C4a anaphylatoxin	A0A0G2JPR0_HUMAN	50Step_Domain_p1200.0_to_1250.0	1200	1250	50.0 AA STEP	50	0	0	0	0	0	0	0	1	0	0			0	0	0	0	0	0
C4A	C4a anaphylatoxin	A0A0G2JPR0_HUMAN	50Step_Domain_p1250.0_to_1300.0	1250	1300	50.0 AA STEP	50	6	7	16	7	0	12	0.08	1	10	6	AEMADQAAAWLTR AEMADQAAAWLTR AEMADQAAAWLTR	AEMADQAAAWLTR AEMADQAAAWLTR	12	4	4	2	0	2
C4A	C4a anaphylatoxin	A0A0G2JPR0_HUMAN	50Step_Domain_p1300.0_to_1350.0	1300	1350	50.0 AA STEP	50	3	17	16	7	0	0	0.2	0.574	12	2	STQDTVIALDALSAYWIASHTTEER STQDTVIALDALSAYWIASHTTEER STQDTVIALDALSAYWIASHTTEER	STQDTVIALDALSAYWIASHTTEER	6	10	4	2	0	0
C4A	C4a anaphylatoxin	A0A0G2JPR0_HUMAN	50Step_Domain_p1350.0_to_1400.0	1350	1400	50.0 AA STEP	50	8	3	0	7	0	0	0.04	1	4	2	GLEEELQFSLGSK TYNVLDMK GLEEELQFSLGSK	GLEEELQFSLGSK	16	2	0	2	0	0
C4A	C4a anaphylatoxin	A0A0G2JPR0_HUMAN	50Step_Domain_p1400.0_to_1450.0	1400	1450	50.0 AA STEP	50	0	0	0	0	0	0	0	1	0	0			0	0	0	0	0	0
C4A	C4a anaphylatoxin	A0A0G2JPR0_HUMAN	50Step_Domain_p1450.0_to_1500.0	1450	1500	50.0 AA STEP	50	0	0	0	0	0	0	0	1	0	0			0	0	0	0	0	0
C4A	C4a anaphylatoxin	A0A0G2JPR0_HUMAN	50Step_Domain_p1500.0_to_1550.0	1500	1550	50.0 AA STEP	50	3	0	0	0	0	0	0.02	1	1	0	YVSHFETEGPHVLLYFDSVPTSR		6	0	0	0	0	0
C4A	C4a anaphylatoxin	A0A0G2JPR0_HUMAN	50Step_Domain_p1550.0_to_1600.0	1550	1600	50.0 AA STEP	50	0	0	0	0	0	0	0	1	0	0			0	0	0	0	0	0
C4A	C4a anaphylatoxin	A0A0G2JPR0_HUMAN	50Step_Domain_p1600.0_to_1650.0	1600	1650	50.0 AA STEP	50	3	0	8	7	0	12	-0.04	1	4	6	VEYGFQVK GLQDEDGYR	VEYGFQVK GLQDEDGYR	6	0	2	2	0	2
C4A	C4a anaphylatoxin	A0A0G2JPR0_HUMAN	50Step_Domain_p1650.0_to_1700.0	1650	1700	50.0 AA STEP	50	0	0	0	0	0	0	0	1	0	0			0	0	0	0	0	0
C4A	C4a anaphylatoxin	A0A0G2JPR0_HUMAN	50Step_Domain_p1700.0_to_1744.0	1700	1744	50.0 AA STEP	44	0	0	0	0	0	0	0	1	0	0			0	0	0	0	0	0
C4A	C4a anaphylatoxin	A0A0G2JPR0_HUMAN	80Step_Domain_p0_to_80	0	80	80.0 AA STEP	80	3	3	0	0	0	0	0.025	1	2	0	VDFTLSSER VDFTLSSER		6	2	0	0	0	0
C4A	C4a anaphylatoxin	A0A0G2JPR0_HUMAN	80Step_Domain_p80.0_to_160.0	80	160	80.0 AA STEP	80	12	13	0	7	17	0	0	1	8	8	DFALLSLQVPLK GHLFLQTDQPIYNPGQR GPEVQLVAHSPWLK TTNIQGINLLFSSR GHLFLQTDQPIYNPGQR GPEVQLVAHSPWLK TTNIQGINLLFSSR	TTNIQGINLLFSSR TTNIQGINLLFSSR	22	8	0	2	2	0
C4A	C4a anaphylatoxin	A0A0G2JPR0_HUMAN	80Step_Domain_p160.0_to_240.0	160	240	80.0 AA STEP	80	13	0	0	7	0	0	0.025	1	4	2	EVYMPSSIFQDDFVIPDISEPGTWK MRPSTDTITVMVENSHGLR YVLPNFEVK	YVLPNFEVK	24	0	0	2	0	0
C4A	C4a anaphylatoxin	A0A0G2JPR0_HUMAN	80Step_Domain_p240.0_to_320.0	240	320	80.0 AA STEP	80	16	13	16	7	0	12	0.1125	1	15	6	AEFQDALEK FGLLDEDGK FGLLDEDGKK ITPGKPYILTVPGHLDEMQLDIQAR LVNGQSHISLSK YVLPNFEVK AEFQDALEK FGLLDEDGK AEFQDALEK	YVLPNFEVK AEFQDALEK	30	8	4	2	0	2
C4A	C4a anaphylatoxin	A0A0G2JPR0_HUMAN	80Step_Domain_p320.0_to_400.0	320	400	80.0 AA STEP	80	11	23	24	20	34	12	-0.0375	1	19	22	AEFQDALEK EMSGSPASGIPVK LNMGITDLQGLR AEFQDALEK EMSGSPASGIPVK HLVPGAPFLLQALVR LNMGITDLQGLR AEFQDALEK LNMGITDLQGLR	HLVPGAPFLLQALVR LNMGITDLQGLR LNMGITDLQGLR AEFQDALEK	20	14	6	6	4	2
C4A	C4a anaphylatoxin	A0A0G2JPR0_HUMAN	80Step_Domain_p400.0_to_480.0	400	480	80.0 AA STEP	80	3	3	0	0	0	0	0.025	1	2	0	EMSGSPASGIPVK EMSGSPASGIPVK		6	2	0	0	0	0
C4A	C4a anaphylatoxin	A0A0G2JPR0_HUMAN	80Step_Domain_p480.0_to_560.0	480	560	80.0 AA STEP	80	2	3	0	0	17	0	-0.05	1	2	6	VGDTLNLNLR VGDTLNLNLR	VGDTLNLNLR	4	2	0	0	2	0
C4A	C4a anaphylatoxin	A0A0G2JPR0_HUMAN	80Step_Domain_p560.0_to_640.0	560	640	80.0 AA STEP	80	5	7	16	0	0	25	0.0125	1	9	8	LELSVDGAK LHLETDSLALVALGALDTALYAAGSK LELSVDGAK	LELSVDGAK	10	4	4	0	0	4
C4A	C4a anaphylatoxin	A0A0G2JPR0_HUMAN	80Step_Domain_p640.0_to_720.0	640	720	80.0 AA STEP	80	0	0	0	0	0	12	-0.05	1	0	4		LGQYASPTAK	0	0	0	0	0	2
C4A	C4a anaphylatoxin	A0A0G2JPR0_HUMAN	80Step_Domain_p720.0_to_800.0	720	800	80.0 AA STEP	80	10	13	8	20	17	0	-0.025	1	10	12	ALEILQEEDLIDEDDIPVR ALEILQEEDLIDEDDIPVR SFFPENWLWR ALEILQEEDLIDEDDIPVR	ALEILQEEDLIDEDDIPVR ALEILQEEDLIDEDDIPVR	18	8	2	6	2	0
C4A	C4a anaphylatoxin	A0A0G2JPR0_HUMAN	80Step_Domain_p800.0_to_880.0	800	880	80.0 AA STEP	80	3	0	0	0	0	0	0.0125	1	1	0	FEQLELRPVLYNYLDK		6	0	0	0	0	0
C4A	C4a anaphylatoxin	A0A0G2JPR0_HUMAN	80Step_Domain_p880.0_to_960.0	880	960	80.0 AA STEP	80	6	7	8	33	0	25	-0.15	0.3454	7	19	EELVYELNPLDHR EGAIHREELVYELNPLDHR GSFEFPVGDAVSK EELVYELNPLDHR EGAIHREELVYELNPLDHR EELVYELNPLDHR	EELVYELNPLDHR TLEIPGNSDPNMIPDGDFNSYVR EELVYELNPLDHR	12	4	2	10	0	4
C4A	C4a anaphylatoxin	A0A0G2JPR0_HUMAN	80Step_Domain_p960.0_to_1040.0	960	1040	80.0 AA STEP	80	25	17	24	33	34	25	-0.1125	1	22	31	GCGEQTMIYLAPTLAASR TEQWSTLPPETK VTASDPLDTLGSEGALSPGGVASLLR VTASDPLDTLGSEGALSPGGVASLLR VTASDPLDTLGSEGALSPGGVASLLR	TLEIPGNSDPNMIPDGDFNSYVR VTASDPLDTLGSEGALSPGGVASLLR VTASDPLDTLGSEGALSPGGVASLLR VTASDPLDTLGSEGALSPGGVASLLR	48	10	6	10	4	4
C4A	C4a anaphylatoxin	A0A0G2JPR0_HUMAN	80Step_Domain_p1040.0_to_1120.0	1040	1120	80.0 AA STEP	80	24	20	16	13	17	12	0.075	1	20	14	ADGSYAAWLSR DHAVDLIQK DSSTWLTAFVLK TEQWSTLPPETK VLSLAQEQVGGSPEK ADGSYAAWLSR VLSLAQEQVGGSPEK VLSLAQEQVGGSPEK	ADGSYAAWLSR DHAVDLIQK ADGSYAAWLSR VLSLAQEQVGGSPEK	46	12	4	4	2	2
C4A	C4a anaphylatoxin	A0A0G2JPR0_HUMAN	80Step_Domain_p1120.0_to_1200.0	1120	1200	80.0 AA STEP	80	0	0	0	0	0	0	0	1	0	0			0	0	0	0	0	0
C4A	C4a anaphylatoxin	A0A0G2JPR0_HUMAN	80Step_Domain_p1200.0_to_1280.0	1200	1280	80.0 AA STEP	80	6	7	16	7	0	12	0.05	1	10	6	AEMADQAAAWLTR AEMADQAAAWLTR AEMADQAAAWLTR	AEMADQAAAWLTR AEMADQAAAWLTR	12	4	4	2	0	2
C4A	C4a anaphylatoxin	A0A0G2JPR0_HUMAN	80Step_Domain_p1280.0_to_1360.0	1280	1360	80.0 AA STEP	80	13	27	32	20	0	12	0.1625	0.2024	24	11	AEMADQAAAWLTR GLEEELQFSLGSK STQDTVIALDALSAYWIASHTTEER AEMADQAAAWLTR GLEEELQFSLGSK STQDTVIALDALSAYWIASHTTEER AEMADQAAAWLTR STQDTVIALDALSAYWIASHTTEER	AEMADQAAAWLTR GLEEELQFSLGSK STQDTVIALDALSAYWIASHTTEER AEMADQAAAWLTR	24	16	8	6	0	2
C4A	C4a anaphylatoxin	A0A0G2JPR0_HUMAN	80Step_Domain_p1360.0_to_1440.0	1360	1440	80.0 AA STEP	80	8	3	0	7	0	0	0.025	1	4	2	GLEEELQFSLGSK TYNVLDMK GLEEELQFSLGSK	GLEEELQFSLGSK	16	2	0	2	0	0
C4A	C4a anaphylatoxin	A0A0G2JPR0_HUMAN	80Step_Domain_p1440.0_to_1520.0	1440	1520	80.0 AA STEP	80	3	0	0	0	0	0	0.0125	1	1	0	YVSHFETEGPHVLLYFDSVPTSR		6	0	0	0	0	0
C4A	C4a anaphylatoxin	A0A0G2JPR0_HUMAN	80Step_Domain_p1520.0_to_1600.0	1520	1600	80.0 AA STEP	80	3	0	0	0	0	0	0.0125	1	1	0	YVSHFETEGPHVLLYFDSVPTSR		6	0	0	0	0	0
C4A	C4a anaphylatoxin	A0A0G2JPR0_HUMAN	80Step_Domain_p1600.0_to_1680.0	1600	1680	80.0 AA STEP	80	3	0	8	7	0	12	-0.025	1	4	6	VEYGFQVK GLQDEDGYR	VEYGFQVK GLQDEDGYR	6	0	2	2	0	2
C4A	C4a anaphylatoxin	A0A0G2JPR0_HUMAN	80Step_Domain_p1680.0_to_1744.0	1680	1744	80.0 AA STEP	64	0	0	0	0	0	0	0	1	0	0			0	0	0	0	0	0
C4A	C4a anaphylatoxin	A0A0G2JPR0_HUMAN	100Step_Domain_p0_to_100	0	100	100.0 AA STEP	100	4	3	0	0	0	0	0.02	1	2	0	DFALLSLQVPLK VDFTLSSER VDFTLSSER		8	2	0	0	0	0
C4A	C4a anaphylatoxin	A0A0G2JPR0_HUMAN	100Step_Domain_p100.0_to_200.0	100	200	100.0 AA STEP	100	21	13	0	7	17	0	0.03	1	11	8	EVYMPSSIFQDDFVIPDISEPGTWK GHLFLQTDQPIYNPGQR GPEVQLVAHSPWLK MRPSTDTITVMVENSHGLR TTNIQGINLLFSSR GHLFLQTDQPIYNPGQR GPEVQLVAHSPWLK TTNIQGINLLFSSR	TTNIQGINLLFSSR TTNIQGINLLFSSR	40	8	0	2	2	0
C4A	C4a anaphylatoxin	A0A0G2JPR0_HUMAN	100Step_Domain_p200.0_to_300.0	200	300	100.0 AA STEP	100	17	3	0	7	0	0	0.05	1	7	2	EVYMPSSIFQDDFVIPDISEPGTWK FGLLDEDGK FGLLDEDGKK ITPGKPYILTVPGHLDEMQLDIQAR YVLPNFEVK FGLLDEDGK	YVLPNFEVK	32	2	0	2	0	0
C4A	C4a anaphylatoxin	A0A0G2JPR0_HUMAN	100Step_Domain_p300.0_to_400.0	300	400	100.0 AA STEP	100	13	23	24	20	34	12	-0.02	1	20	22	AEFQDALEK EMSGSPASGIPVK LNMGITDLQGLR LVNGQSHISLSK AEFQDALEK EMSGSPASGIPVK HLVPGAPFLLQALVR LNMGITDLQGLR AEFQDALEK LNMGITDLQGLR	HLVPGAPFLLQALVR LNMGITDLQGLR LNMGITDLQGLR AEFQDALEK	24	14	6	6	4	2
C4A	C4a anaphylatoxin	A0A0G2JPR0_HUMAN	100Step_Domain_p400.0_to_500.0	400	500	100.0 AA STEP	100	5	7	0	0	17	0	-0.02	1	4	6	EMSGSPASGIPVK VGDTLNLNLR EMSGSPASGIPVK VGDTLNLNLR	VGDTLNLNLR	10	4	0	0	2	0
C4A	C4a anaphylatoxin	A0A0G2JPR0_HUMAN	100Step_Domain_p500.0_to_600.0	500	600	100.0 AA STEP	100	5	7	16	0	0	25	0.01	1	9	8	LELSVDGAK LHLETDSLALVALGALDTALYAAGSK LELSVDGAK	LELSVDGAK	10	4	4	0	0	4
C4A	C4a anaphylatoxin	A0A0G2JPR0_HUMAN	100Step_Domain_p600.0_to_700.0	600	700	100.0 AA STEP	100	0	7	0	0	0	12	-0.02	1	2	4	LHLETDSLALVALGALDTALYAAGSK	LGQYASPTAK	0	4	0	0	0	2
C4A	C4a anaphylatoxin	A0A0G2JPR0_HUMAN	100Step_Domain_p700.0_to_800.0	700	800	100.0 AA STEP	100	10	13	8	20	17	0	-0.02	1	10	12	ALEILQEEDLIDEDDIPVR ALEILQEEDLIDEDDIPVR SFFPENWLWR ALEILQEEDLIDEDDIPVR	ALEILQEEDLIDEDDIPVR ALEILQEEDLIDEDDIPVR	18	8	2	6	2	0
C4A	C4a anaphylatoxin	A0A0G2JPR0_HUMAN	100Step_Domain_p800.0_to_900.0	800	900	100.0 AA STEP	100	3	0	0	0	0	0	0.01	1	1	0	FEQLELRPVLYNYLDK		6	0	0	0	0	0
C4A	C4a anaphylatoxin	A0A0G2JPR0_HUMAN	100Step_Domain_p900.0_to_1000.0	900	1000	100.0 AA STEP	100	17	23	32	46	34	50	-0.19	0.0072	24	43	EELVYELNPLDHR EGAIHREELVYELNPLDHR GSFEFPVGDAVSK VTASDPLDTLGSEGALSPGGVASLLR EELVYELNPLDHR EGAIHREELVYELNPLDHR VTASDPLDTLGSEGALSPGGVASLLR EELVYELNPLDHR VTASDPLDTLGSEGALSPGGVASLLR	EELVYELNPLDHR TLEIPGNSDPNMIPDGDFNSYVR VTASDPLDTLGSEGALSPGGVASLLR VTASDPLDTLGSEGALSPGGVASLLR EELVYELNPLDHR VTASDPLDTLGSEGALSPGGVASLLR	32	14	8	14	4	8
C4A	C4a anaphylatoxin	A0A0G2JPR0_HUMAN	100Step_Domain_p1000.0_to_1100.0	1000	1100	100.0 AA STEP	100	37	37	40	26	51	37	0	1	38	38	ADGSYAAWLSR DHAVDLIQK DSSTWLTAFVLK GCGEQTMIYLAPTLAASR TEQWSTLPPETK VLSLAQEQVGGSPEK VTASDPLDTLGSEGALSPGGVASLLR ADGSYAAWLSR VLSLAQEQVGGSPEK VTASDPLDTLGSEGALSPGGVASLLR VLSLAQEQVGGSPEK VTASDPLDTLGSEGALSPGGVASLLR	ADGSYAAWLSR DHAVDLIQK VTASDPLDTLGSEGALSPGGVASLLR ADGSYAAWLSR VTASDPLDTLGSEGALSPGGVASLLR VLSLAQEQVGGSPEK VTASDPLDTLGSEGALSPGGVASLLR	70	22	10	8	6	6
C4A	C4a anaphylatoxin	A0A0G2JPR0_HUMAN	100Step_Domain_p1100.0_to_1200.0	1100	1200	100.0 AA STEP	100	0	0	0	0	0	0	0	1	0	0			0	0	0	0	0	0
C4A	C4a anaphylatoxin	A0A0G2JPR0_HUMAN	100Step_Domain_p1200.0_to_1300.0	1200	1300	100.0 AA STEP	100	6	7	16	7	0	12	0.04	1	10	6	AEMADQAAAWLTR AEMADQAAAWLTR AEMADQAAAWLTR	AEMADQAAAWLTR AEMADQAAAWLTR	12	4	4	2	0	2
C4A	C4a anaphylatoxin	A0A0G2JPR0_HUMAN	100Step_Domain_p1300.0_to_1400.0	1300	1400	100.0 AA STEP	100	12	20	16	13	0	0	0.12	0.5148	16	4	GLEEELQFSLGSK STQDTVIALDALSAYWIASHTTEER TYNVLDMK GLEEELQFSLGSK STQDTVIALDALSAYWIASHTTEER STQDTVIALDALSAYWIASHTTEER	GLEEELQFSLGSK STQDTVIALDALSAYWIASHTTEER	22	12	4	4	0	0
C4A	C4a anaphylatoxin	A0A0G2JPR0_HUMAN	100Step_Domain_p1400.0_to_1500.0	1400	1500	100.0 AA STEP	100	0	0	0	0	0	0	0	1	0	0			0	0	0	0	0	0
C4A	C4a anaphylatoxin	A0A0G2JPR0_HUMAN	100Step_Domain_p1500.0_to_1600.0	1500	1600	100.0 AA STEP	100	3	0	0	0	0	0	0.01	1	1	0	YVSHFETEGPHVLLYFDSVPTSR		6	0	0	0	0	0
C4A	C4a anaphylatoxin	A0A0G2JPR0_HUMAN	100Step_Domain_p1600.0_to_1700.0	1600	1700	100.0 AA STEP	100	3	0	8	7	0	12	-0.02	1	4	6	VEYGFQVK GLQDEDGYR	VEYGFQVK GLQDEDGYR	6	0	2	2	0	2
C4A	C4a anaphylatoxin	A0A0G2JPR0_HUMAN	100Step_Domain_p1700.0_to_1744.0	1700	1744	100.0 AA STEP	44	0	0	0	0	0	0	0	1	0	0			0	0	0	0	0	0
IGL@	IGL@ protein	Q8N355_HUMAN	Ig-like	20	108	DOMAINS	88	7	1	0	0	10	0	0	1	3	3	FSGSNSGNTATLTISR FSGSNSGNTATLTISR	FSGSNSGNTATLTISR	14	2	0	0	2	0
IGL@	IGL@ protein	Q8N355_HUMAN	Ig-like_135_229	135	229	DOMAINS	94	50	56	59	0	52	0	0.404255	0.0362	55	17	AAPSVTLFPPSSEELQANK ADSSPVKAGVETTTPSK AGVETTTPSK SYSCQVTHEGSTVEK YAASSYLSLTPEQWK AAPSVTLFPPSSEELQANK SYSCQVTHEGSTVEK YAASSYLSLTPEQWK AAPSVTLFPPSSEELQANK YAASSYLSLTPEQWK	AAPSVTLFPPSSEELQANK	100	80	38	0	10	0
IGL@	IGL@ protein	Q8N355_HUMAN	50Step_Domain_p0_to_50	0	50	50.0 AA STEP	50	0	0	0	0	0	0	0	1	0	0			0	0	0	0	0	0
IGL@	IGL@ protein	Q8N355_HUMAN	50Step_Domain_p50.0_to_100.0	50	100	50.0 AA STEP	50	7	1	0	0	10	0	0	1	3	3	FSGSNSGNTATLTISR FSGSNSGNTATLTISR	FSGSNSGNTATLTISR	14	2	0	0	2	0
IGL@	IGL@ protein	Q8N355_HUMAN	50Step_Domain_p100.0_to_150.0	100	150	50.0 AA STEP	50	42	48	50	0	52	0	0.6	0.0845	47	17	AAPSVTLFPPSSEELQANK LTVLGQPK AAPSVTLFPPSSEELQANK LTVLGQPK AAPSVTLFPPSSEELQANK LTVLGQPK	AAPSVTLFPPSSEELQANK	84	68	32	0	10	0
IGL@	IGL@ protein	Q8N355_HUMAN	50Step_Domain_p150.0_to_200.0	150	200	50.0 AA STEP	50	48	55	59	0	52	0	0.74	0.0195	54	17	AAPSVTLFPPSSEELQANK ADSSPVKAGVETTTPSK AGVETTTPSK YAASSYLSLTPEQWK AAPSVTLFPPSSEELQANK YAASSYLSLTPEQWK AAPSVTLFPPSSEELQANK YAASSYLSLTPEQWK	AAPSVTLFPPSSEELQANK	96	78	38	0	10	0
IGL@	IGL@ protein	Q8N355_HUMAN	50Step_Domain_p200.0_to_234.0	200	234	50.0 AA STEP	34	11	13	12	0	0	0	0.352941	1	12	0	SYSCQVTHEGSTVEK YAASSYLSLTPEQWK SYSCQVTHEGSTVEK YAASSYLSLTPEQWK YAASSYLSLTPEQWK		22	18	8	0	0	0
IGL@	IGL@ protein	Q8N355_HUMAN	80Step_Domain_p0_to_80	0	80	80.0 AA STEP	80	7	1	0	0	10	0	0	1	3	3	FSGSNSGNTATLTISR FSGSNSGNTATLTISR	FSGSNSGNTATLTISR	14	2	0	0	2	0
IGL@	IGL@ protein	Q8N355_HUMAN	80Step_Domain_p80.0_to_160.0	80	160	80.0 AA STEP	80	49	49	50	0	62	0	0.35	0.1086	49	21	AAPSVTLFPPSSEELQANK FSGSNSGNTATLTISR LTVLGQPK AAPSVTLFPPSSEELQANK FSGSNSGNTATLTISR LTVLGQPK AAPSVTLFPPSSEELQANK LTVLGQPK	AAPSVTLFPPSSEELQANK FSGSNSGNTATLTISR	98	70	32	0	12	0
IGL@	IGL@ protein	Q8N355_HUMAN	80Step_Domain_p160.0_to_234.0	160	234	80.0 AA STEP	74	13	13	12	0	0	0	0.175676	0.9537	13	0	ADSSPVKAGVETTTPSK AGVETTTPSK SYSCQVTHEGSTVEK YAASSYLSLTPEQWK SYSCQVTHEGSTVEK YAASSYLSLTPEQWK YAASSYLSLTPEQWK		26	18	8	0	0	0
IGL@	IGL@ protein	Q8N355_HUMAN	100Step_Domain_p0_to_100	0	100	100.0 AA STEP	100	7	1	0	0	10	0	0	1	3	3	FSGSNSGNTATLTISR FSGSNSGNTATLTISR	FSGSNSGNTATLTISR	14	2	0	0	2	0
IGL@	IGL@ protein	Q8N355_HUMAN	100Step_Domain_p100.0_to_200.0	100	200	100.0 AA STEP	100	53	59	62	0	52	0	0.41	0.0063	58	17	AAPSVTLFPPSSEELQANK ADSSPVKAGVETTTPSK AGVETTTPSK LTVLGQPK YAASSYLSLTPEQWK AAPSVTLFPPSSEELQANK LTVLGQPK YAASSYLSLTPEQWK AAPSVTLFPPSSEELQANK LTVLGQPK YAASSYLSLTPEQWK	AAPSVTLFPPSSEELQANK	106	84	40	0	10	0
IGL@	IGL@ protein	Q8N355_HUMAN	100Step_Domain_p200.0_to_234.0	200	234	100.0 AA STEP	34	11	13	12	0	0	0	0.352941	0.8115	12	0	SYSCQVTHEGSTVEK YAASSYLSLTPEQWK SYSCQVTHEGSTVEK YAASSYLSLTPEQWK YAASSYLSLTPEQWK		22	18	8	0	0	0
C8G	Complement component C8 gamma chain	CO8G_HUMAN	50Step_Domain_p0_to_50	0	50	50.0 AA STEP	50	1	0	0	0	0	0	0	1	0	0	RPASPISTIQPK		2	0	0	0	0	0
C8G	Complement component C8 gamma chain	CO8G_HUMAN	50Step_Domain_p50.0_to_100.0	50	100	50.0 AA STEP	50	5	5	0	0	0	0	0.06	0.4	3	0	AEATTLHVAPQGTAMAVSTFR AEATTLHVAPQGTAMAVSTFR		10	6	0	0	0	0
C8G	Complement component C8 gamma chain	CO8G_HUMAN	50Step_Domain_p100.0_to_150.0	100	150	50.0 AA STEP	50	2	2	12	0	0	0	0.1	0.0395	5	0	QLYGDTGVLGR QLYGDTGVLGR QLYGDTGVLGR		4	2	2	0	0	0
C8G	Complement component C8 gamma chain	CO8G_HUMAN	50Step_Domain_p150.0_to_200.0	150	200	50.0 AA STEP	50	16	17	12	0	0	0	0.3	0	15	0	SLPVSDSVLSGFEQR VQEAHLTEDQIFYFPK SLPVSDSVLSGFEQR VQEAHLTEDQIFYFPK SLPVSDSVLSGFEQR		32	20	2	0	0	0
C8G	Complement component C8 gamma chain	CO8G_HUMAN	50Step_Domain_p200.0_to_202.0	200	202	50.0 AA STEP	2	0	0	0	0	0	0	0	1	0	0			0	0	0	0	0	0
C8G	Complement component C8 gamma chain	CO8G_HUMAN	80Step_Domain_p0_to_80	0	80	80.0 AA STEP	80	6	5	0	0	0	0	0.05	0.5598	4	0	AEATTLHVAPQGTAMAVSTFR RPASPISTIQPK AEATTLHVAPQGTAMAVSTFR		12	6	0	0	0	0
C8G	Complement component C8 gamma chain	CO8G_HUMAN	80Step_Domain_p80.0_to_160.0	80	160	80.0 AA STEP	80	13	12	24	0	0	0	0.2	0	16	0	AEATTLHVAPQGTAMAVSTFR QLYGDTGVLGR SLPVSDSVLSGFEQR AEATTLHVAPQGTAMAVSTFR QLYGDTGVLGR SLPVSDSVLSGFEQR QLYGDTGVLGR SLPVSDSVLSGFEQR		26	14	4	0	0	0
C8G	Complement component C8 gamma chain	CO8G_HUMAN	80Step_Domain_p160.0_to_202.0	160	202	80.0 AA STEP	42	16	17	12	0	0	0	0.357143	0.0003	15	0	SLPVSDSVLSGFEQR VQEAHLTEDQIFYFPK SLPVSDSVLSGFEQR VQEAHLTEDQIFYFPK SLPVSDSVLSGFEQR		32	20	2	0	0	0
C8G	Complement component C8 gamma chain	CO8G_HUMAN	100Step_Domain_p0_to_100	0	100	100.0 AA STEP	100	6	5	0	0	0	0	0.04	0.0969	4	0	AEATTLHVAPQGTAMAVSTFR RPASPISTIQPK AEATTLHVAPQGTAMAVSTFR		12	6	0	0	0	0
C8G	Complement component C8 gamma chain	CO8G_HUMAN	100Step_Domain_p100.0_to_200.0	100	200	100.0 AA STEP	100	18	19	24	0	0	0	0.2	0	20	0	QLYGDTGVLGR SLPVSDSVLSGFEQR VQEAHLTEDQIFYFPK QLYGDTGVLGR SLPVSDSVLSGFEQR VQEAHLTEDQIFYFPK QLYGDTGVLGR SLPVSDSVLSGFEQR		36	22	4	0	0	0
C8G	Complement component C8 gamma chain	CO8G_HUMAN	100Step_Domain_p200.0_to_202.0	200	202	100.0 AA STEP	2	0	0	0	0	0	0	0	1	0	0			0	0	0	0	0	0
N/A	Complement component 8 subunit beta	B7Z555_HUMAN	50Step_Domain_p0_to_50	0	50	50.0 AA STEP	50	0	0	0	0	0	0	0	1	0	0			0	0	0	0	0	0
N/A	Complement component 8 subunit beta	B7Z555_HUMAN	50Step_Domain_p50.0_to_100.0	50	100	50.0 AA STEP	50	0	0	0	0	0	0	0	1	0	0			0	0	0	0	0	0
N/A	Complement component 8 subunit beta	B7Z555_HUMAN	50Step_Domain_p100.0_to_150.0	100	150	50.0 AA STEP	50	0	0	0	0	0	0	0	1	0	0			0	0	0	0	0	0
N/A	Complement component 8 subunit beta	B7Z555_HUMAN	50Step_Domain_p150.0_to_200.0	150	200	50.0 AA STEP	50	6	7	0	0	0	0	0.08	0.825	4	0	EYESYSDFER KPYNVESYTPQTQGK SGFSFGFK EYESYSDFER KPYNVESYTPQTQGK SGFSFGFK		12	12	0	0	0	0
N/A	Complement component 8 subunit beta	B7Z555_HUMAN	50Step_Domain_p200.0_to_250.0	200	250	50.0 AA STEP	50	6	10	8	0	0	0	0.16	0.0176	8	0	IPGIFELGISSQSDR SGFSFGFK IPGIFELGISSQSDR SGFSFGFK IPGIFELGISSQSDR		12	18	2	0	0	0
N/A	Complement component 8 subunit beta	B7Z555_HUMAN	50Step_Domain_p250.0_to_300.0	250	300	50.0 AA STEP	50	5	4	23	0	0	0	0.22	0.0011	11	0	LPLEYSYGEYR SLMLHYEFLQR DFGTHYITEAVLGGIYEYTLVMNK LPLEYSYGEYR SLMLHYEFLQR LPLEYSYGEYR		10	8	6	0	0	0
N/A	Complement component 8 subunit beta	B7Z555_HUMAN	50Step_Domain_p300.0_to_350.0	300	350	50.0 AA STEP	50	0	2	0	0	0	0	0.02	1	1	0	DFGTHYITEAVLGGIYEYTLVMNK		0	4	0	0	0	0
N/A	Complement component 8 subunit beta	B7Z555_HUMAN	50Step_Domain_p350.0_to_400.0	350	400	50.0 AA STEP	50	11	7	0	0	0	0	0.12	0.1672	6	0	DTMVEDLVVLVR GGASEHITTLAYQELPTADLMQEWGDAVQYNPAIIK GILNEIKDR RDTMVEDLVVLVR DTMVEDLVVLVR GGASEHITTLAYQELPTADLMQEWGDAVQYNPAIIK GILNEIKDR RDTMVEDLVVLVR		22	12	0	0	0	0
N/A	Complement component 8 subunit beta	B7Z555_HUMAN	50Step_Domain_p400.0_to_450.0	400	450	50.0 AA STEP	50	8	8	0	0	0	0	0.1	0.3289	5	0	GGASEHITTLAYQELPTADLMQEWGDAVQYNPAIIK VEPLYELVTATDFAYSSTVR GGASEHITTLAYQELPTADLMQEWGDAVQYNPAIIK VEPLYELVTATDFAYSSTVR		16	14	0	0	0	0
N/A	Complement component 8 subunit beta	B7Z555_HUMAN	50Step_Domain_p450.0_to_500.0	450	500	50.0 AA STEP	50	0	0	0	0	0	0	0	1	0	0			0	0	0	0	0	0
N/A	Complement component 8 subunit beta	B7Z555_HUMAN	50Step_Domain_p500.0_to_539.0	500	539	50.0 AA STEP	39	0	0	0	0	0	0	0	1	0	0			0	0	0	0	0	0
N/A	Complement component 8 subunit beta	B7Z555_HUMAN	80Step_Domain_p0_to_80	0	80	80.0 AA STEP	80	0	0	0	0	0	0	0	1	0	0			0	0	0	0	0	0
N/A	Complement component 8 subunit beta	B7Z555_HUMAN	80Step_Domain_p80.0_to_160.0	80	160	80.0 AA STEP	80	1	1	0	0	0	0	0.0125	1	1	0	KPYNVESYTPQTQGK KPYNVESYTPQTQGK		2	2	0	0	0	0
N/A	Complement component 8 subunit beta	B7Z555_HUMAN	80Step_Domain_p160.0_to_240.0	160	240	80.0 AA STEP	80	10	13	8	0	0	0	0.125	0.0084	10	0	EYESYSDFER IPGIFELGISSQSDR KPYNVESYTPQTQGK SGFSFGFK EYESYSDFER IPGIFELGISSQSDR KPYNVESYTPQTQGK SGFSFGFK IPGIFELGISSQSDR		20	24	2	0	0	0
N/A	Complement component 8 subunit beta	B7Z555_HUMAN	80Step_Domain_p240.0_to_320.0	240	320	80.0 AA STEP	80	5	4	23	0	0	0	0.1375	0.0063	11	0	LPLEYSYGEYR SLMLHYEFLQR DFGTHYITEAVLGGIYEYTLVMNK LPLEYSYGEYR SLMLHYEFLQR LPLEYSYGEYR		10	8	6	0	0	0
N/A	Complement component 8 subunit beta	B7Z555_HUMAN	80Step_Domain_p320.0_to_400.0	320	400	80.0 AA STEP	80	11	7	0	0	0	0	0.075	0.322	6	0	DTMVEDLVVLVR GGASEHITTLAYQELPTADLMQEWGDAVQYNPAIIK GILNEIKDR RDTMVEDLVVLVR DTMVEDLVVLVR GGASEHITTLAYQELPTADLMQEWGDAVQYNPAIIK GILNEIKDR RDTMVEDLVVLVR		22	12	0	0	0	0
N/A	Complement component 8 subunit beta	B7Z555_HUMAN	80Step_Domain_p400.0_to_480.0	400	480	80.0 AA STEP	80	8	8	0	0	0	0	0.0625	0.518	5	0	GGASEHITTLAYQELPTADLMQEWGDAVQYNPAIIK VEPLYELVTATDFAYSSTVR GGASEHITTLAYQELPTADLMQEWGDAVQYNPAIIK VEPLYELVTATDFAYSSTVR		16	14	0	0	0	0
N/A	Complement component 8 subunit beta	B7Z555_HUMAN	80Step_Domain_p480.0_to_539.0	480	539	80.0 AA STEP	59	0	0	0	0	0	0	0	1	0	0			0	0	0	0	0	0
N/A	Complement component 8 subunit beta	B7Z555_HUMAN	100Step_Domain_p0_to_100	0	100	100.0 AA STEP	100	0	0	0	0	0	0	0	1	0	0			0	0	0	0	0	0
N/A	Complement component 8 subunit beta	B7Z555_HUMAN	100Step_Domain_p100.0_to_200.0	100	200	100.0 AA STEP	100	6	7	0	0	0	0	0.04	1	4	0	EYESYSDFER KPYNVESYTPQTQGK SGFSFGFK EYESYSDFER KPYNVESYTPQTQGK SGFSFGFK		12	12	0	0	0	0
N/A	Complement component 8 subunit beta	B7Z555_HUMAN	100Step_Domain_p200.0_to_300.0	200	300	100.0 AA STEP	100	11	14	30	0	0	0	0.18	0	18	0	IPGIFELGISSQSDR LPLEYSYGEYR SGFSFGFK SLMLHYEFLQR DFGTHYITEAVLGGIYEYTLVMNK IPGIFELGISSQSDR LPLEYSYGEYR SGFSFGFK SLMLHYEFLQR IPGIFELGISSQSDR LPLEYSYGEYR		22	26	8	0	0	0
N/A	Complement component 8 subunit beta	B7Z555_HUMAN	100Step_Domain_p300.0_to_400.0	300	400	100.0 AA STEP	100	11	9	0	0	0	0	0.07	0.255	7	0	DTMVEDLVVLVR GGASEHITTLAYQELPTADLMQEWGDAVQYNPAIIK GILNEIKDR RDTMVEDLVVLVR DFGTHYITEAVLGGIYEYTLVMNK DTMVEDLVVLVR GGASEHITTLAYQELPTADLMQEWGDAVQYNPAIIK GILNEIKDR RDTMVEDLVVLVR		22	16	0	0	0	0
N/A	Complement component 8 subunit beta	B7Z555_HUMAN	100Step_Domain_p400.0_to_500.0	400	500	100.0 AA STEP	100	8	8	0	0	0	0	0.05	0.597	5	0	GGASEHITTLAYQELPTADLMQEWGDAVQYNPAIIK VEPLYELVTATDFAYSSTVR GGASEHITTLAYQELPTADLMQEWGDAVQYNPAIIK VEPLYELVTATDFAYSSTVR		16	14	0	0	0	0
N/A	Complement component 8 subunit beta	B7Z555_HUMAN	100Step_Domain_p500.0_to_539.0	500	539	100.0 AA STEP	39	0	0	0	0	0	0	0	1	0	0			0	0	0	0	0	0
N/A	Complement component 8 subunit beta	B7ZA94_HUMAN	50Step_Domain_p0_to_50	0	50	50.0 AA STEP	50	0	0	0	0	0	0	0	1	0	0			0	0	0	0	0	0
N/A	Complement component 8 subunit beta	B7ZA94_HUMAN	50Step_Domain_p50.0_to_100.0	50	100	50.0 AA STEP	50	0	0	0	0	0	0	0	1	0	0			0	0	0	0	0	0
N/A	Complement component 8 subunit beta	B7ZA94_HUMAN	50Step_Domain_p100.0_to_150.0	100	150	50.0 AA STEP	50	0	0	0	0	0	0	0	1	0	0			0	0	0	0	0	0
N/A	Complement component 8 subunit beta	B7ZA94_HUMAN	50Step_Domain_p150.0_to_200.0	150	200	50.0 AA STEP	50	6	7	0	0	0	0	0.08	0.825	4	0	EYESYSDFER KPYNVESYTPQTQGK SGFSFGFK EYESYSDFER KPYNVESYTPQTQGK SGFSFGFK		12	12	0	0	0	0
N/A	Complement component 8 subunit beta	B7ZA94_HUMAN	50Step_Domain_p200.0_to_250.0	200	250	50.0 AA STEP	50	6	10	8	0	0	0	0.16	0.0176	8	0	IPGIFELGISSQSDR SGFSFGFK IPGIFELGISSQSDR SGFSFGFK IPGIFELGISSQSDR		12	18	2	0	0	0
N/A	Complement component 8 subunit beta	B7ZA94_HUMAN	50Step_Domain_p250.0_to_300.0	250	300	50.0 AA STEP	50	5	4	23	0	0	0	0.22	0.0011	11	0	LPLEYSYGEYR SLMLHYEFLQR DFGTHYITEAVLGGIYEYTLVMNK LPLEYSYGEYR SLMLHYEFLQR LPLEYSYGEYR		10	8	6	0	0	0
N/A	Complement component 8 subunit beta	B7ZA94_HUMAN	50Step_Domain_p300.0_to_350.0	300	350	50.0 AA STEP	50	0	2	0	0	0	0	0.02	1	1	0	DFGTHYITEAVLGGIYEYTLVMNK		0	4	0	0	0	0
N/A	Complement component 8 subunit beta	B7ZA94_HUMAN	50Step_Domain_p350.0_to_400.0	350	400	50.0 AA STEP	50	11	7	0	0	0	0	0.12	0.1672	6	0	DTMVEDLVVLVR GGASEHITTLAYQELPTADLMQEWGDAVQYNPAIIK GILNEIKDR RDTMVEDLVVLVR DTMVEDLVVLVR GGASEHITTLAYQELPTADLMQEWGDAVQYNPAIIK GILNEIKDR RDTMVEDLVVLVR		22	12	0	0	0	0
N/A	Complement component 8 subunit beta	B7ZA94_HUMAN	50Step_Domain_p400.0_to_450.0	400	450	50.0 AA STEP	50	8	8	0	0	0	0	0.1	0.3289	5	0	GGASEHITTLAYQELPTADLMQEWGDAVQYNPAIIK VEPLYELVTATDFAYSSTVR GGASEHITTLAYQELPTADLMQEWGDAVQYNPAIIK VEPLYELVTATDFAYSSTVR		16	14	0	0	0	0
N/A	Complement component 8 subunit beta	B7ZA94_HUMAN	50Step_Domain_p450.0_to_500.0	450	500	50.0 AA STEP	50	0	0	0	0	0	0	0	1	0	0			0	0	0	0	0	0
N/A	Complement component 8 subunit beta	B7ZA94_HUMAN	50Step_Domain_p500.0_to_539.0	500	539	50.0 AA STEP	39	0	0	0	0	0	0	0	1	0	0			0	0	0	0	0	0
N/A	Complement component 8 subunit beta	B7ZA94_HUMAN	80Step_Domain_p0_to_80	0	80	80.0 AA STEP	80	0	0	0	0	0	0	0	1	0	0			0	0	0	0	0	0
N/A	Complement component 8 subunit beta	B7ZA94_HUMAN	80Step_Domain_p80.0_to_160.0	80	160	80.0 AA STEP	80	1	1	0	0	0	0	0.0125	1	1	0	KPYNVESYTPQTQGK KPYNVESYTPQTQGK		2	2	0	0	0	0
N/A	Complement component 8 subunit beta	B7ZA94_HUMAN	80Step_Domain_p160.0_to_240.0	160	240	80.0 AA STEP	80	10	13	8	0	0	0	0.125	0.0084	10	0	EYESYSDFER IPGIFELGISSQSDR KPYNVESYTPQTQGK SGFSFGFK EYESYSDFER IPGIFELGISSQSDR KPYNVESYTPQTQGK SGFSFGFK IPGIFELGISSQSDR		20	24	2	0	0	0
N/A	Complement component 8 subunit beta	B7ZA94_HUMAN	80Step_Domain_p240.0_to_320.0	240	320	80.0 AA STEP	80	5	4	23	0	0	0	0.1375	0.0063	11	0	LPLEYSYGEYR SLMLHYEFLQR DFGTHYITEAVLGGIYEYTLVMNK LPLEYSYGEYR SLMLHYEFLQR LPLEYSYGEYR		10	8	6	0	0	0
N/A	Complement component 8 subunit beta	B7ZA94_HUMAN	80Step_Domain_p320.0_to_400.0	320	400	80.0 AA STEP	80	11	7	0	0	0	0	0.075	0.322	6	0	DTMVEDLVVLVR GGASEHITTLAYQELPTADLMQEWGDAVQYNPAIIK GILNEIKDR RDTMVEDLVVLVR DTMVEDLVVLVR GGASEHITTLAYQELPTADLMQEWGDAVQYNPAIIK GILNEIKDR RDTMVEDLVVLVR		22	12	0	0	0	0
N/A	Complement component 8 subunit beta	B7ZA94_HUMAN	80Step_Domain_p400.0_to_480.0	400	480	80.0 AA STEP	80	8	8	0	0	0	0	0.0625	0.518	5	0	GGASEHITTLAYQELPTADLMQEWGDAVQYNPAIIK VEPLYELVTATDFAYSSTVR GGASEHITTLAYQELPTADLMQEWGDAVQYNPAIIK VEPLYELVTATDFAYSSTVR		16	14	0	0	0	0
N/A	Complement component 8 subunit beta	B7ZA94_HUMAN	80Step_Domain_p480.0_to_539.0	480	539	80.0 AA STEP	59	0	0	0	0	0	0	0	1	0	0			0	0	0	0	0	0
N/A	Complement component 8 subunit beta	B7ZA94_HUMAN	100Step_Domain_p0_to_100	0	100	100.0 AA STEP	100	0	0	0	0	0	0	0	1	0	0			0	0	0	0	0	0
N/A	Complement component 8 subunit beta	B7ZA94_HUMAN	100Step_Domain_p100.0_to_200.0	100	200	100.0 AA STEP	100	6	7	0	0	0	0	0.04	1	4	0	EYESYSDFER KPYNVESYTPQTQGK SGFSFGFK EYESYSDFER KPYNVESYTPQTQGK SGFSFGFK		12	12	0	0	0	0
N/A	Complement component 8 subunit beta	B7ZA94_HUMAN	100Step_Domain_p200.0_to_300.0	200	300	100.0 AA STEP	100	11	14	30	0	0	0	0.18	0	18	0	IPGIFELGISSQSDR LPLEYSYGEYR SGFSFGFK SLMLHYEFLQR DFGTHYITEAVLGGIYEYTLVMNK IPGIFELGISSQSDR LPLEYSYGEYR SGFSFGFK SLMLHYEFLQR IPGIFELGISSQSDR LPLEYSYGEYR		22	26	8	0	0	0
N/A	Complement component 8 subunit beta	B7ZA94_HUMAN	100Step_Domain_p300.0_to_400.0	300	400	100.0 AA STEP	100	11	9	0	0	0	0	0.07	0.255	7	0	DTMVEDLVVLVR GGASEHITTLAYQELPTADLMQEWGDAVQYNPAIIK GILNEIKDR RDTMVEDLVVLVR DFGTHYITEAVLGGIYEYTLVMNK DTMVEDLVVLVR GGASEHITTLAYQELPTADLMQEWGDAVQYNPAIIK GILNEIKDR RDTMVEDLVVLVR		22	16	0	0	0	0
N/A	Complement component 8 subunit beta	B7ZA94_HUMAN	100Step_Domain_p400.0_to_500.0	400	500	100.0 AA STEP	100	8	8	0	0	0	0	0.05	0.597	5	0	GGASEHITTLAYQELPTADLMQEWGDAVQYNPAIIK VEPLYELVTATDFAYSSTVR GGASEHITTLAYQELPTADLMQEWGDAVQYNPAIIK VEPLYELVTATDFAYSSTVR		16	14	0	0	0	0
N/A	Complement component 8 subunit beta	B7ZA94_HUMAN	100Step_Domain_p500.0_to_539.0	500	539	100.0 AA STEP	39	0	0	0	0	0	0	0	1	0	0			0	0	0	0	0	0
C8B	Complement component C8 beta chain	CO8B_HUMAN	TSP type-1 1	64	117	DOMAINS	53	0	0	0	0	0	0	0	1	0	0			0	0	0	0	0	0
C8B	Complement component C8 beta chain	CO8B_HUMAN	LDL-receptor class A	120	157	DOMAINS	37	0	0	0	0	0	0	0	1	0	0			0	0	0	0	0	0
C8B	Complement component C8 beta chain	CO8B_HUMAN	MACPF	158	504	DOMAINS	346	30	30	30	0	0	0	0.0867052	0	30	0	DTMVEDLVVLVR EYESYSDFER GGASEHITTLAYQELPTADLMQEWGDAVQYNPAIIK GILNEIKDR IPGIFELGISSQSDR KPYNVESYTPQTQGK LPLEYSYGEYR RDTMVEDLVVLVR SGFSFGFK SLMLHYEFLQR VEPLYELVTATDFAYSSTVR DFGTHYITEAVLGGIYEYTLVMNK DTMVEDLVVLVR EYESYSDFER GGASEHITTLAYQELPTADLMQEWGDAVQYNPAIIK GILNEIKDR IPGIFELGISSQSDR KPYNVESYTPQTQGK LPLEYSYGEYR RDTMVEDLVVLVR SGFSFGFK SLMLHYEFLQR VEPLYELVTATDFAYSSTVR IPGIFELGISSQSDR LPLEYSYGEYR		60	54	8	0	0	0
C8B	Complement component C8 beta chain	CO8B_HUMAN	EGF-like	505	535	DOMAINS	30	0	0	0	0	0	0	0	1	0	0			0	0	0	0	0	0
C8B	Complement component C8 beta chain	CO8B_HUMAN	TSP type-1 2	545	591	DOMAINS	46	0	0	0	0	0	0	0	1	0	0			0	0	0	0	0	0
C8B	Complement component C8 beta chain	CO8B_HUMAN	50Step_Domain_p0_to_50	0	50	50.0 AA STEP	50	0	0	0	0	0	0	0	1	0	0			0	0	0	0	0	0
C8B	Complement component C8 beta chain	CO8B_HUMAN	50Step_Domain_p50.0_to_100.0	50	100	50.0 AA STEP	50	0	0	0	0	0	0	0	1	0	0			0	0	0	0	0	0
C8B	Complement component C8 beta chain	CO8B_HUMAN	50Step_Domain_p100.0_to_150.0	100	150	50.0 AA STEP	50	0	0	0	0	0	0	0	1	0	0			0	0	0	0	0	0
C8B	Complement component C8 beta chain	CO8B_HUMAN	50Step_Domain_p150.0_to_200.0	150	200	50.0 AA STEP	50	0	0	0	0	0	0	0	1	0	0			0	0	0	0	0	0
C8B	Complement component C8 beta chain	CO8B_HUMAN	50Step_Domain_p200.0_to_250.0	200	250	50.0 AA STEP	50	4	3	0	0	0	0	0.04	1	2	0	EYESYSDFER KPYNVESYTPQTQGK EYESYSDFER KPYNVESYTPQTQGK		8	6	0	0	0	0
C8B	Complement component C8 beta chain	CO8B_HUMAN	50Step_Domain_p250.0_to_300.0	250	300	50.0 AA STEP	50	6	10	8	0	0	0	0.16	0.0084	8	0	IPGIFELGISSQSDR SGFSFGFK IPGIFELGISSQSDR SGFSFGFK IPGIFELGISSQSDR		12	18	2	0	0	0
C8B	Complement component C8 beta chain	CO8B_HUMAN	50Step_Domain_p300.0_to_350.0	300	350	50.0 AA STEP	50	5	4	23	0	0	0	0.22	0	11	0	LPLEYSYGEYR SLMLHYEFLQR DFGTHYITEAVLGGIYEYTLVMNK LPLEYSYGEYR SLMLHYEFLQR LPLEYSYGEYR		10	8	6	0	0	0
C8B	Complement component C8 beta chain	CO8B_HUMAN	50Step_Domain_p350.0_to_400.0	350	400	50.0 AA STEP	50	0	2	0	0	0	0	0.02	1	1	0	DFGTHYITEAVLGGIYEYTLVMNK		0	4	0	0	0	0
C8B	Complement component C8 beta chain	CO8B_HUMAN	50Step_Domain_p400.0_to_450.0	400	450	50.0 AA STEP	50	11	7	0	0	0	0	0.12	0.1116	6	0	DTMVEDLVVLVR GGASEHITTLAYQELPTADLMQEWGDAVQYNPAIIK GILNEIKDR RDTMVEDLVVLVR DTMVEDLVVLVR GGASEHITTLAYQELPTADLMQEWGDAVQYNPAIIK GILNEIKDR RDTMVEDLVVLVR		22	12	0	0	0	0
C8B	Complement component C8 beta chain	CO8B_HUMAN	50Step_Domain_p450.0_to_500.0	450	500	50.0 AA STEP	50	8	8	0	0	0	0	0.1	0.2376	5	0	GGASEHITTLAYQELPTADLMQEWGDAVQYNPAIIK VEPLYELVTATDFAYSSTVR GGASEHITTLAYQELPTADLMQEWGDAVQYNPAIIK VEPLYELVTATDFAYSSTVR		16	14	0	0	0	0
C8B	Complement component C8 beta chain	CO8B_HUMAN	50Step_Domain_p500.0_to_550.0	500	550	50.0 AA STEP	50	0	0	0	0	0	0	0	1	0	0			0	0	0	0	0	0
C8B	Complement component C8 beta chain	CO8B_HUMAN	50Step_Domain_p550.0_to_591.0	550	591	50.0 AA STEP	41	0	0	0	0	0	0	0	1	0	0			0	0	0	0	0	0
C8B	Complement component C8 beta chain	CO8B_HUMAN	80Step_Domain_p0_to_80	0	80	80.0 AA STEP	80	0	0	0	0	0	0	0	1	0	0			0	0	0	0	0	0
C8B	Complement component C8 beta chain	CO8B_HUMAN	80Step_Domain_p80.0_to_160.0	80	160	80.0 AA STEP	80	0	0	0	0	0	0	0	1	0	0			0	0	0	0	0	0
C8B	Complement component C8 beta chain	CO8B_HUMAN	80Step_Domain_p160.0_to_240.0	160	240	80.0 AA STEP	80	4	3	0	0	0	0	0.025	1	2	0	EYESYSDFER KPYNVESYTPQTQGK EYESYSDFER KPYNVESYTPQTQGK		8	6	0	0	0	0
C8B	Complement component C8 beta chain	CO8B_HUMAN	80Step_Domain_p240.0_to_320.0	240	320	80.0 AA STEP	80	12	13	8	0	0	0	0.1375	0.0088	11	0	EYESYSDFER IPGIFELGISSQSDR SGFSFGFK SLMLHYEFLQR EYESYSDFER IPGIFELGISSQSDR SGFSFGFK SLMLHYEFLQR IPGIFELGISSQSDR		24	24	2	0	0	0
C8B	Complement component C8 beta chain	CO8B_HUMAN	80Step_Domain_p320.0_to_400.0	320	400	80.0 AA STEP	80	2	3	23	0	0	0	0.1125	0.036	9	0	LPLEYSYGEYR DFGTHYITEAVLGGIYEYTLVMNK LPLEYSYGEYR LPLEYSYGEYR		4	6	6	0	0	0
C8B	Complement component C8 beta chain	CO8B_HUMAN	80Step_Domain_p400.0_to_480.0	400	480	80.0 AA STEP	80	15	12	0	0	0	0	0.1125	0.048	9	0	DTMVEDLVVLVR GGASEHITTLAYQELPTADLMQEWGDAVQYNPAIIK GILNEIKDR RDTMVEDLVVLVR VEPLYELVTATDFAYSSTVR DTMVEDLVVLVR GGASEHITTLAYQELPTADLMQEWGDAVQYNPAIIK GILNEIKDR RDTMVEDLVVLVR VEPLYELVTATDFAYSSTVR		30	22	0	0	0	0
C8B	Complement component C8 beta chain	CO8B_HUMAN	80Step_Domain_p480.0_to_560.0	480	560	80.0 AA STEP	80	4	6	0	0	0	0	0.0375	1	3	0	VEPLYELVTATDFAYSSTVR VEPLYELVTATDFAYSSTVR		8	10	0	0	0	0
C8B	Complement component C8 beta chain	CO8B_HUMAN	80Step_Domain_p560.0_to_591.0	560	591	80.0 AA STEP	31	0	0	0	0	0	0	0	1	0	0			0	0	0	0	0	0
C8B	Complement component C8 beta chain	CO8B_HUMAN	100Step_Domain_p0_to_100	0	100	100.0 AA STEP	100	0	0	0	0	0	0	0	1	0	0			0	0	0	0	0	0
C8B	Complement component C8 beta chain	CO8B_HUMAN	100Step_Domain_p100.0_to_200.0	100	200	100.0 AA STEP	100	0	0	0	0	0	0	0	1	0	0			0	0	0	0	0	0
C8B	Complement component C8 beta chain	CO8B_HUMAN	100Step_Domain_p200.0_to_300.0	200	300	100.0 AA STEP	100	10	13	8	0	0	0	0.1	0.021	10	0	EYESYSDFER IPGIFELGISSQSDR KPYNVESYTPQTQGK SGFSFGFK EYESYSDFER IPGIFELGISSQSDR KPYNVESYTPQTQGK SGFSFGFK IPGIFELGISSQSDR		20	24	2	0	0	0
C8B	Complement component C8 beta chain	CO8B_HUMAN	100Step_Domain_p300.0_to_400.0	300	400	100.0 AA STEP	100	5	4	23	0	0	0	0.11	0.0162	11	0	LPLEYSYGEYR SLMLHYEFLQR DFGTHYITEAVLGGIYEYTLVMNK LPLEYSYGEYR SLMLHYEFLQR LPLEYSYGEYR		10	8	6	0	0	0
C8B	Complement component C8 beta chain	CO8B_HUMAN	100Step_Domain_p400.0_to_500.0	400	500	100.0 AA STEP	100	15	12	0	0	0	0	0.09	0.057	9	0	DTMVEDLVVLVR GGASEHITTLAYQELPTADLMQEWGDAVQYNPAIIK GILNEIKDR RDTMVEDLVVLVR VEPLYELVTATDFAYSSTVR DTMVEDLVVLVR GGASEHITTLAYQELPTADLMQEWGDAVQYNPAIIK GILNEIKDR RDTMVEDLVVLVR VEPLYELVTATDFAYSSTVR		30	22	0	0	0	0
C8B	Complement component C8 beta chain	CO8B_HUMAN	100Step_Domain_p500.0_to_591.0	500	591	100.0 AA STEP	91	0	0	0	0	0	0	0	1	0	0			0	0	0	0	0	0
C8A	Complement component C8 alpha chain	CO8A_HUMAN	TSP type-1 1	38	91	DOMAINS	53	0	0	0	0	0	0	0	1	0	0			0	0	0	0	0	0
C8A	Complement component C8 alpha chain	CO8A_HUMAN	LDL-receptor class A	94	132	DOMAINS	38	0	0	0	0	0	0	0	1	0	0			0	0	0	0	0	0
C8A	Complement component C8 alpha chain	CO8A_HUMAN	MACPF	135	498	DOMAINS	363	15	15	0	0	0	0	0.0275482	0.001	10	0	AMAVEDIISR MESLGITSR YHFEALADTGISSEFYDNANDLLSK YNPVVIDFEMQPIHEVLR AALGYNILTQEDAQSVYDASYYGGQCETVYNGEWR AMAVEDIISR FINDYGTHYITSGSMGGIYEYILVIDK MESLGITSR YHFEALADTGISSEFYDNANDLLSK YNPVVIDFEMQPIHEVLR		30	28	0	0	0	0
C8A	Complement component C8 alpha chain	CO8A_HUMAN	EGF-like	499	529	DOMAINS	30	0	0	0	0	0	0	0	1	0	0			0	0	0	0	0	0
C8A	Complement component C8 alpha chain	CO8A_HUMAN	TSP type-1 2	539	583	DOMAINS	44	0	0	0	0	0	0	0	1	0	0			0	0	0	0	0	0
C8A	Complement component C8 alpha chain	CO8A_HUMAN	50Step_Domain_p0_to_50	0	50	50.0 AA STEP	50	0	0	0	0	0	0	0	1	0	0			0	0	0	0	0	0
C8A	Complement component C8 alpha chain	CO8A_HUMAN	50Step_Domain_p50.0_to_100.0	50	100	50.0 AA STEP	50	0	0	0	0	0	0	0	1	0	0			0	0	0	0	0	0
C8A	Complement component C8 alpha chain	CO8A_HUMAN	50Step_Domain_p100.0_to_150.0	100	150	50.0 AA STEP	50	0	0	0	0	0	0	0	1	0	0			0	0	0	0	0	0
C8A	Complement component C8 alpha chain	CO8A_HUMAN	50Step_Domain_p150.0_to_200.0	150	200	50.0 AA STEP	50	0	2	0	0	0	0	0.02	1	1	0	AALGYNILTQEDAQSVYDASYYGGQCETVYNGEWR		0	4	0	0	0	0
C8A	Complement component C8 alpha chain	CO8A_HUMAN	50Step_Domain_p200.0_to_250.0	200	250	50.0 AA STEP	50	2	3	0	0	0	0	0.04	0.5604	2	0	YHFEALADTGISSEFYDNANDLLSK YHFEALADTGISSEFYDNANDLLSK		4	6	0	0	0	0
C8A	Complement component C8 alpha chain	CO8A_HUMAN	50Step_Domain_p250.0_to_300.0	250	300	50.0 AA STEP	50	0	0	0	0	0	0	0	1	0	0			0	0	0	0	0	0
C8A	Complement component C8 alpha chain	CO8A_HUMAN	50Step_Domain_p300.0_to_350.0	300	350	50.0 AA STEP	50	0	1	0	0	0	0	0	1	0	0	FINDYGTHYITSGSMGGIYEYILVIDK		0	2	0	0	0	0
C8A	Complement component C8 alpha chain	CO8A_HUMAN	50Step_Domain_p350.0_to_400.0	350	400	50.0 AA STEP	50	2	2	0	0	0	0	0.02	1	1	0	MESLGITSR FINDYGTHYITSGSMGGIYEYILVIDK MESLGITSR		4	4	0	0	0	0
C8A	Complement component C8 alpha chain	CO8A_HUMAN	50Step_Domain_p400.0_to_450.0	400	450	50.0 AA STEP	50	3	2	0	0	0	0	0.04	0.5604	2	0	AMAVEDIISR AMAVEDIISR		6	4	0	0	0	0
C8A	Complement component C8 alpha chain	CO8A_HUMAN	50Step_Domain_p450.0_to_500.0	450	500	50.0 AA STEP	50	8	5	0	0	0	0	0.08	0	4	0	YNPVVIDFEMQPIHEVLR YNPVVIDFEMQPIHEVLR		16	10	0	0	0	0
C8A	Complement component C8 alpha chain	CO8A_HUMAN	50Step_Domain_p500.0_to_550.0	500	550	50.0 AA STEP	50	0	0	0	0	0	0	0	1	0	0			0	0	0	0	0	0
C8A	Complement component C8 alpha chain	CO8A_HUMAN	50Step_Domain_p550.0_to_584.0	550	584	50.0 AA STEP	34	0	0	0	0	0	0	0	1	0	0			0	0	0	0	0	0
C8A	Complement component C8 alpha chain	CO8A_HUMAN	80Step_Domain_p0_to_80	0	80	80.0 AA STEP	80	0	0	0	0	0	0	0	1	0	0			0	0	0	0	0	0
C8A	Complement component C8 alpha chain	CO8A_HUMAN	80Step_Domain_p80.0_to_160.0	80	160	80.0 AA STEP	80	0	2	0	0	0	0	0.0125	1	1	0	AALGYNILTQEDAQSVYDASYYGGQCETVYNGEWR		0	4	0	0	0	0
C8A	Complement component C8 alpha chain	CO8A_HUMAN	80Step_Domain_p160.0_to_240.0	160	240	80.0 AA STEP	80	2	5	0	0	0	0	0.025	0.6792	2	0	YHFEALADTGISSEFYDNANDLLSK AALGYNILTQEDAQSVYDASYYGGQCETVYNGEWR YHFEALADTGISSEFYDNANDLLSK		4	10	0	0	0	0
C8A	Complement component C8 alpha chain	CO8A_HUMAN	80Step_Domain_p240.0_to_320.0	240	320	80.0 AA STEP	80	0	0	0	0	0	0	0	1	0	0			0	0	0	0	0	0
C8A	Complement component C8 alpha chain	CO8A_HUMAN	80Step_Domain_p320.0_to_400.0	320	400	80.0 AA STEP	80	2	2	0	0	0	0	0.0125	1	1	0	MESLGITSR FINDYGTHYITSGSMGGIYEYILVIDK MESLGITSR		4	4	0	0	0	0
C8A	Complement component C8 alpha chain	CO8A_HUMAN	80Step_Domain_p400.0_to_480.0	400	480	80.0 AA STEP	80	11	8	0	0	0	0	0.075	0	6	0	AMAVEDIISR YNPVVIDFEMQPIHEVLR AMAVEDIISR YNPVVIDFEMQPIHEVLR		22	14	0	0	0	0
C8A	Complement component C8 alpha chain	CO8A_HUMAN	80Step_Domain_p480.0_to_560.0	480	560	80.0 AA STEP	80	0	0	0	0	0	0	0	1	0	0			0	0	0	0	0	0
C8A	Complement component C8 alpha chain	CO8A_HUMAN	80Step_Domain_p560.0_to_584.0	560	584	80.0 AA STEP	24	0	0	0	0	0	0	0	1	0	0			0	0	0	0	0	0
C8A	Complement component C8 alpha chain	CO8A_HUMAN	100Step_Domain_p0_to_100	0	100	100.0 AA STEP	100	0	0	0	0	0	0	0	1	0	0			0	0	0	0	0	0
C8A	Complement component C8 alpha chain	CO8A_HUMAN	100Step_Domain_p100.0_to_200.0	100	200	100.0 AA STEP	100	0	2	0	0	0	0	0.01	1	1	0	AALGYNILTQEDAQSVYDASYYGGQCETVYNGEWR		0	4	0	0	0	0
C8A	Complement component C8 alpha chain	CO8A_HUMAN	100Step_Domain_p200.0_to_300.0	200	300	100.0 AA STEP	100	2	3	0	0	0	0	0.02	1	2	0	YHFEALADTGISSEFYDNANDLLSK YHFEALADTGISSEFYDNANDLLSK		4	6	0	0	0	0
C8A	Complement component C8 alpha chain	CO8A_HUMAN	100Step_Domain_p300.0_to_400.0	300	400	100.0 AA STEP	100	2	2	0	0	0	0	0.01	1	1	0	MESLGITSR FINDYGTHYITSGSMGGIYEYILVIDK MESLGITSR		4	4	0	0	0	0
C8A	Complement component C8 alpha chain	CO8A_HUMAN	100Step_Domain_p400.0_to_500.0	400	500	100.0 AA STEP	100	11	8	0	0	0	0	0.06	0.0012	6	0	AMAVEDIISR YNPVVIDFEMQPIHEVLR AMAVEDIISR YNPVVIDFEMQPIHEVLR		22	14	0	0	0	0
C8A	Complement component C8 alpha chain	CO8A_HUMAN	100Step_Domain_p500.0_to_584.0	500	584	100.0 AA STEP	84	0	0	0	0	0	0	0	1	0	0			0	0	0	0	0	0
CRLF1	Cytokine receptor-like factor 1	CRLF1_HUMAN	Ig-like C2-type	38	131	DOMAINS	93	0	0	0	0	0	0	0	1	0	0			0	0	0	0	0	0
CRLF1	Cytokine receptor-like factor 1	CRLF1_HUMAN	Fibronectin type-III 1	137	232	DOMAINS	95	3	2	0	0	0	0	0.0210526	0.1176	2	0	DLALFTPYEIWVEATNR DLALFTPYEIWVEATNR		4	4	0	0	0	0
CRLF1	Cytokine receptor-like factor 1	CRLF1_HUMAN	Fibronectin type-III 2	237	341	DOMAINS	104	3	2	5	0	0	0	0.0288462	0.0018	3	0	VGGLEDQLSVR VGGLEDQLSVR VGGLEDQLSVR YRVEDSVDWK		4	4	4	0	0	0
CRLF1	Cytokine receptor-like factor 1	CRLF1_HUMAN	50Step_Domain_p0_to_50	0	50	50.0 AA STEP	50	0	0	0	0	0	0	0	1	0	0			0	0	0	0	0	0
CRLF1	Cytokine receptor-like factor 1	CRLF1_HUMAN	50Step_Domain_p50.0_to_100.0	50	100	50.0 AA STEP	50	0	0	0	0	0	0	0	1	0	0			0	0	0	0	0	0
CRLF1	Cytokine receptor-like factor 1	CRLF1_HUMAN	50Step_Domain_p100.0_to_150.0	100	150	50.0 AA STEP	50	0	0	0	0	0	0	0	1	0	0			0	0	0	0	0	0
CRLF1	Cytokine receptor-like factor 1	CRLF1_HUMAN	50Step_Domain_p150.0_to_200.0	150	200	50.0 AA STEP	50	3	2	0	0	0	0	0.04	0.0099	2	0	DLALFTPYEIWVEATNR DLALFTPYEIWVEATNR		4	4	0	0	0	0
CRLF1	Cytokine receptor-like factor 1	CRLF1_HUMAN	50Step_Domain_p200.0_to_250.0	200	250	50.0 AA STEP	50	5	4	3	0	0	0	0.08	0	4	0	DLALFTPYEIWVEATNR VGGLEDQLSVR DLALFTPYEIWVEATNR VGGLEDQLSVR VGGLEDQLSVR		8	8	2	0	0	0
CRLF1	Cytokine receptor-like factor 1	CRLF1_HUMAN	50Step_Domain_p250.0_to_300.0	250	300	50.0 AA STEP	50	3	2	5	0	0	0	0.06	0	3	0	VGGLEDQLSVR VGGLEDQLSVR VGGLEDQLSVR YRVEDSVDWK		4	4	4	0	0	0
CRLF1	Cytokine receptor-like factor 1	CRLF1_HUMAN	50Step_Domain_p300.0_to_350.0	300	350	50.0 AA STEP	50	0	0	0	0	0	0	0	1	0	0			0	0	0	0	0	0
CRLF1	Cytokine receptor-like factor 1	CRLF1_HUMAN	50Step_Domain_p350.0_to_400.0	350	400	50.0 AA STEP	50	0	0	0	0	0	0	0	1	0	0			0	0	0	0	0	0
CRLF1	Cytokine receptor-like factor 1	CRLF1_HUMAN	50Step_Domain_p400.0_to_422.0	400	422	50.0 AA STEP	22	0	1	0	0	0	0	0	1	0	0	NQDEGILPSGR		0	2	0	0	0	0
CRLF1	Cytokine receptor-like factor 1	CRLF1_HUMAN	80Step_Domain_p0_to_80	0	80	80.0 AA STEP	80	0	0	0	0	0	0	0	1	0	0			0	0	0	0	0	0
CRLF1	Cytokine receptor-like factor 1	CRLF1_HUMAN	80Step_Domain_p80.0_to_160.0	80	160	80.0 AA STEP	80	0	0	0	0	0	0	0	1	0	0			0	0	0	0	0	0
CRLF1	Cytokine receptor-like factor 1	CRLF1_HUMAN	80Step_Domain_p160.0_to_240.0	160	240	80.0 AA STEP	80	3	2	0	0	0	0	0.025	0.0252	2	0	DLALFTPYEIWVEATNR DLALFTPYEIWVEATNR		4	4	0	0	0	0
CRLF1	Cytokine receptor-like factor 1	CRLF1_HUMAN	80Step_Domain_p240.0_to_320.0	240	320	80.0 AA STEP	80	3	2	5	0	0	0	0.0375	0	3	0	VGGLEDQLSVR VGGLEDQLSVR VGGLEDQLSVR YRVEDSVDWK		4	4	4	0	0	0
CRLF1	Cytokine receptor-like factor 1	CRLF1_HUMAN	80Step_Domain_p320.0_to_400.0	320	400	80.0 AA STEP	80	0	0	0	0	0	0	0	1	0	0			0	0	0	0	0	0
CRLF1	Cytokine receptor-like factor 1	CRLF1_HUMAN	80Step_Domain_p400.0_to_422.0	400	422	80.0 AA STEP	22	0	1	0	0	0	0	0	1	0	0	NQDEGILPSGR		0	2	0	0	0	0
CRLF1	Cytokine receptor-like factor 1	CRLF1_HUMAN	100Step_Domain_p0_to_100	0	100	100.0 AA STEP	100	0	0	0	0	0	0	0	1	0	0			0	0	0	0	0	0
CRLF1	Cytokine receptor-like factor 1	CRLF1_HUMAN	100Step_Domain_p100.0_to_200.0	100	200	100.0 AA STEP	100	3	2	0	0	0	0	0.02	0.0065	2	0	DLALFTPYEIWVEATNR DLALFTPYEIWVEATNR		4	4	0	0	0	0
CRLF1	Cytokine receptor-like factor 1	CRLF1_HUMAN	100Step_Domain_p200.0_to_300.0	200	300	100.0 AA STEP	100	5	4	5	0	0	0	0.05	0	5	0	DLALFTPYEIWVEATNR VGGLEDQLSVR DLALFTPYEIWVEATNR VGGLEDQLSVR VGGLEDQLSVR YRVEDSVDWK		8	8	4	0	0	0
CRLF1	Cytokine receptor-like factor 1	CRLF1_HUMAN	100Step_Domain_p300.0_to_400.0	300	400	100.0 AA STEP	100	0	0	0	0	0	0	0	1	0	0			0	0	0	0	0	0
CRLF1	Cytokine receptor-like factor 1	CRLF1_HUMAN	100Step_Domain_p400.0_to_422.0	400	422	100.0 AA STEP	22	0	1	0	0	0	0	0	1	0	0	NQDEGILPSGR		0	2	0	0	0	0
B3GNT7	UDP-GlcNAc:betaGal beta-1;3-N-acetylglucosaminyltransferase 7	B3GN7_HUMAN	Cytoplasmic	1	6	TOPO_DOM	5	0	0	0	0	0	0	0	1	0	0			0	0	0	0	0	0
B3GNT7	UDP-GlcNAc:betaGal beta-1;3-N-acetylglucosaminyltransferase 7	B3GN7_HUMAN	Lumenal	27	401	TOPO_DOM	374	4	4	4	4	4	0	0.0026738	0.39	4	3	ASYPPYAGGGGFLMAGSLAR THYQQLLAYEDR TLFLLGTASK THYQQLLAYEDR TLFLLGTASK THYQQLLAYEDR TLFLLGTASK	THYQQLLAYEDR YFPMLLNHPEK GDDDVFVNPTNLLEFLADR THYQQLLAYEDR TLFLLGTASK	6	6	6	4	8	0
B3GNT7	UDP-GlcNAc:betaGal beta-1;3-N-acetylglucosaminyltransferase 7	B3GN7_HUMAN	50Step_Domain_p0_to_50	0	50	50.0 AA STEP	50	0	0	0	0	0	0	0	1	0	0			0	0	0	0	0	0
B3GNT7	UDP-GlcNAc:betaGal beta-1;3-N-acetylglucosaminyltransferase 7	B3GN7_HUMAN	50Step_Domain_p50.0_to_100.0	50	100	50.0 AA STEP	50	0	0	0	0	0	0	0	1	0	0			0	0	0	0	0	0
B3GNT7	UDP-GlcNAc:betaGal beta-1;3-N-acetylglucosaminyltransferase 7	B3GN7_HUMAN	50Step_Domain_p100.0_to_150.0	100	150	50.0 AA STEP	50	0	0	0	2	0	0	-0.02	1	0	1		YFPMLLNHPEK	0	0	0	2	0	0
B3GNT7	UDP-GlcNAc:betaGal beta-1;3-N-acetylglucosaminyltransferase 7	B3GN7_HUMAN	50Step_Domain_p150.0_to_200.0	150	200	50.0 AA STEP	50	3	4	4	2	3	0	0.04	0.0009	4	2	THYQQLLAYEDR TLFLLGTASK THYQQLLAYEDR TLFLLGTASK THYQQLLAYEDR TLFLLGTASK	THYQQLLAYEDR THYQQLLAYEDR TLFLLGTASK	4	6	6	2	6	0
B3GNT7	UDP-GlcNAc:betaGal beta-1;3-N-acetylglucosaminyltransferase 7	B3GN7_HUMAN	50Step_Domain_p200.0_to_250.0	200	250	50.0 AA STEP	50	0	0	0	0	1	0	0	1	0	0		GDDDVFVNPTNLLEFLADR	0	0	0	0	2	0
B3GNT7	UDP-GlcNAc:betaGal beta-1;3-N-acetylglucosaminyltransferase 7	B3GN7_HUMAN	50Step_Domain_p250.0_to_300.0	250	300	50.0 AA STEP	50	1	0	0	0	1	0	0	1	0	0	ASYPPYAGGGGFLMAGSLAR	GDDDVFVNPTNLLEFLADR	2	0	0	0	2	0
B3GNT7	UDP-GlcNAc:betaGal beta-1;3-N-acetylglucosaminyltransferase 7	B3GN7_HUMAN	50Step_Domain_p300.0_to_350.0	300	350	50.0 AA STEP	50	1	0	0	0	0	0	0	1	0	0	ASYPPYAGGGGFLMAGSLAR		2	0	0	0	0	0
B3GNT7	UDP-GlcNAc:betaGal beta-1;3-N-acetylglucosaminyltransferase 7	B3GN7_HUMAN	50Step_Domain_p350.0_to_400.0	350	400	50.0 AA STEP	50	0	0	0	0	0	0	0	1	0	0			0	0	0	0	0	0
B3GNT7	UDP-GlcNAc:betaGal beta-1;3-N-acetylglucosaminyltransferase 7	B3GN7_HUMAN	50Step_Domain_p400.0_to_401.0	400	401	50.0 AA STEP	1	0	0	0	0	0	0	0	1	0	0			0	0	0	0	0	0
B3GNT7	UDP-GlcNAc:betaGal beta-1;3-N-acetylglucosaminyltransferase 7	B3GN7_HUMAN	80Step_Domain_p0_to_80	0	80	80.0 AA STEP	80	0	0	0	0	0	0	0	1	0	0			0	0	0	0	0	0
B3GNT7	UDP-GlcNAc:betaGal beta-1;3-N-acetylglucosaminyltransferase 7	B3GN7_HUMAN	80Step_Domain_p80.0_to_160.0	80	160	80.0 AA STEP	80	0	0	0	2	0	0	-0.0125	1	0	1		YFPMLLNHPEK	0	0	0	2	0	0
B3GNT7	UDP-GlcNAc:betaGal beta-1;3-N-acetylglucosaminyltransferase 7	B3GN7_HUMAN	80Step_Domain_p160.0_to_240.0	160	240	80.0 AA STEP	80	3	4	4	2	4	0	0.025	0.0582	4	2	THYQQLLAYEDR TLFLLGTASK THYQQLLAYEDR TLFLLGTASK THYQQLLAYEDR TLFLLGTASK	THYQQLLAYEDR GDDDVFVNPTNLLEFLADR THYQQLLAYEDR TLFLLGTASK	4	6	6	2	8	0
B3GNT7	UDP-GlcNAc:betaGal beta-1;3-N-acetylglucosaminyltransferase 7	B3GN7_HUMAN	80Step_Domain_p240.0_to_320.0	240	320	80.0 AA STEP	80	1	0	0	0	1	0	0	1	0	0	ASYPPYAGGGGFLMAGSLAR	GDDDVFVNPTNLLEFLADR	2	0	0	0	2	0
B3GNT7	UDP-GlcNAc:betaGal beta-1;3-N-acetylglucosaminyltransferase 7	B3GN7_HUMAN	80Step_Domain_p320.0_to_400.0	320	400	80.0 AA STEP	80	0	0	0	0	0	0	0	1	0	0			0	0	0	0	0	0
B3GNT7	UDP-GlcNAc:betaGal beta-1;3-N-acetylglucosaminyltransferase 7	B3GN7_HUMAN	80Step_Domain_p400.0_to_401.0	400	401	80.0 AA STEP	1	0	0	0	0	0	0	0	1	0	0			0	0	0	0	0	0
B3GNT7	UDP-GlcNAc:betaGal beta-1;3-N-acetylglucosaminyltransferase 7	B3GN7_HUMAN	100Step_Domain_p0_to_100	0	100	100.0 AA STEP	100	0	0	0	0	0	0	0	1	0	0			0	0	0	0	0	0
B3GNT7	UDP-GlcNAc:betaGal beta-1;3-N-acetylglucosaminyltransferase 7	B3GN7_HUMAN	100Step_Domain_p100.0_to_200.0	100	200	100.0 AA STEP	100	3	4	4	4	3	0	0.02	0.2115	4	2	THYQQLLAYEDR TLFLLGTASK THYQQLLAYEDR TLFLLGTASK THYQQLLAYEDR TLFLLGTASK	THYQQLLAYEDR YFPMLLNHPEK THYQQLLAYEDR TLFLLGTASK	4	6	6	4	6	0
B3GNT7	UDP-GlcNAc:betaGal beta-1;3-N-acetylglucosaminyltransferase 7	B3GN7_HUMAN	100Step_Domain_p200.0_to_300.0	200	300	100.0 AA STEP	100	1	0	0	0	1	0	0	1	0	0	ASYPPYAGGGGFLMAGSLAR	GDDDVFVNPTNLLEFLADR	2	0	0	0	2	0
B3GNT7	UDP-GlcNAc:betaGal beta-1;3-N-acetylglucosaminyltransferase 7	B3GN7_HUMAN	100Step_Domain_p300.0_to_400.0	300	400	100.0 AA STEP	100	1	0	0	0	0	0	0	1	0	0	ASYPPYAGGGGFLMAGSLAR		2	0	0	0	0	0
B3GNT7	UDP-GlcNAc:betaGal beta-1;3-N-acetylglucosaminyltransferase 7	B3GN7_HUMAN	100Step_Domain_p400.0_to_401.0	400	401	100.0 AA STEP	1	0	0	0	0	0	0	0	1	0	0			0	0	0	0	0	0
N/A	cDNA; FLJ93532; highly similar to Homo sapiens osteomodulin (OMD); mRNA	B2R7N9_HUMAN	50Step_Domain_p0_to_50	0	50	50.0 AA STEP	50	0	0	0	0	0	0	0	1	0	0			0	0	0	0	0	0
N/A	cDNA; FLJ93532; highly similar to Homo sapiens osteomodulin (OMD); mRNA	B2R7N9_HUMAN	50Step_Domain_p50.0_to_100.0	50	100	50.0 AA STEP	50	0	0	0	0	0	0	0	1	0	0			0	0	0	0	0	0
N/A	cDNA; FLJ93532; highly similar to Homo sapiens osteomodulin (OMD); mRNA	B2R7N9_HUMAN	50Step_Domain_p100.0_to_150.0	100	150	50.0 AA STEP	50	14	9	9	8	9	12	0.02	1	11	10	IDYGVFAK LPNLLQLHLEHNNLEEFPFPLPK IDYGVFAK IDYGVFAK	IDYGVFAK IDYGVFAK IDYGVFAK	8	14	8	4	8	8
N/A	cDNA; FLJ93532; highly similar to Homo sapiens osteomodulin (OMD); mRNA	B2R7N9_HUMAN	50Step_Domain_p150.0_to_200.0	150	200	50.0 AA STEP	50	10	5	4	16	9	12	-0.12	0.0144	6	12	LLLGYNEISK LPNLLQLHLEHNNLEEFPFPLPK LLLGYNEISK LLLGYNEISK	LLLGYNEISK LLLGYNEISK LLLGYNEISK	6	8	4	8	8	8
N/A	cDNA; FLJ93532; highly similar to Homo sapiens osteomodulin (OMD); mRNA	B2R7N9_HUMAN	50Step_Domain_p200.0_to_250.0	200	250	50.0 AA STEP	50	0	1	0	0	0	0	0	1	0	0	LMQLNLCSNR		0	2	0	0	0	0
N/A	cDNA; FLJ93532; highly similar to Homo sapiens osteomodulin (OMD); mRNA	B2R7N9_HUMAN	50Step_Domain_p250.0_to_300.0	250	300	50.0 AA STEP	50	4	4	0	0	2	0	0.04	1	3	1	LQDIPYNIFNLPNIVELSVGHNK LQDIPYNIFNLPNIVELSVGHNK	LQDIPYNIFNLPNIVELSVGHNK	2	6	0	0	2	0
N/A	cDNA; FLJ93532; highly similar to Homo sapiens osteomodulin (OMD); mRNA	B2R7N9_HUMAN	50Step_Domain_p300.0_to_350.0	300	350	50.0 AA STEP	50	4	8	15	4	9	3	0.08	0.3996	9	5	NLEHLYLQNNEIEK NLEHLYLQNNEIEK NLEHLYLQNNEIEK	NLEHLYLQNNEIEK NLEHLYLQNNEIEK NLEHLYLQNNEIEK	2	12	14	2	8	2
N/A	cDNA; FLJ93532; highly similar to Homo sapiens osteomodulin (OMD); mRNA	B2R7N9_HUMAN	50Step_Domain_p350.0_to_400.0	350	400	50.0 AA STEP	50	0	0	0	0	0	0	0	1	0	0			0	0	0	0	0	0
N/A	cDNA; FLJ93532; highly similar to Homo sapiens osteomodulin (OMD); mRNA	B2R7N9_HUMAN	50Step_Domain_p400.0_to_421.0	400	421	50.0 AA STEP	21	0	0	0	0	0	0	0	1	0	0			0	0	0	0	0	0
N/A	cDNA; FLJ93532; highly similar to Homo sapiens osteomodulin (OMD); mRNA	B2R7N9_HUMAN	80Step_Domain_p0_to_80	0	80	80.0 AA STEP	80	0	0	0	0	0	0	0	1	0	0			0	0	0	0	0	0
N/A	cDNA; FLJ93532; highly similar to Homo sapiens osteomodulin (OMD); mRNA	B2R7N9_HUMAN	80Step_Domain_p80.0_to_160.0	80	160	80.0 AA STEP	80	14	9	9	8	9	12	0.0125	1	11	10	IDYGVFAK LPNLLQLHLEHNNLEEFPFPLPK IDYGVFAK IDYGVFAK	IDYGVFAK IDYGVFAK IDYGVFAK	8	14	8	4	8	8
N/A	cDNA; FLJ93532; highly similar to Homo sapiens osteomodulin (OMD); mRNA	B2R7N9_HUMAN	80Step_Domain_p160.0_to_240.0	160	240	80.0 AA STEP	80	10	7	4	16	9	12	-0.0625	0.072	7	12	LLLGYNEISK LPNLLQLHLEHNNLEEFPFPLPK LLLGYNEISK LMQLNLCSNR LLLGYNEISK	LLLGYNEISK LLLGYNEISK LLLGYNEISK	6	10	4	8	8	8
N/A	cDNA; FLJ93532; highly similar to Homo sapiens osteomodulin (OMD); mRNA	B2R7N9_HUMAN	80Step_Domain_p240.0_to_320.0	240	320	80.0 AA STEP	80	7	12	15	4	11	3	0.0625	0.072	11	6	LQDIPYNIFNLPNIVELSVGHNK NLEHLYLQNNEIEK LQDIPYNIFNLPNIVELSVGHNK NLEHLYLQNNEIEK NLEHLYLQNNEIEK	NLEHLYLQNNEIEK LQDIPYNIFNLPNIVELSVGHNK NLEHLYLQNNEIEK NLEHLYLQNNEIEK	4	18	14	2	10	2
N/A	cDNA; FLJ93532; highly similar to Homo sapiens osteomodulin (OMD); mRNA	B2R7N9_HUMAN	80Step_Domain_p320.0_to_400.0	320	400	80.0 AA STEP	80	0	0	0	0	0	0	0	1	0	0			0	0	0	0	0	0
N/A	cDNA; FLJ93532; highly similar to Homo sapiens osteomodulin (OMD); mRNA	B2R7N9_HUMAN	80Step_Domain_p400.0_to_421.0	400	421	80.0 AA STEP	21	0	0	0	0	0	0	0	1	0	0			0	0	0	0	0	0
N/A	cDNA; FLJ93532; highly similar to Homo sapiens osteomodulin (OMD); mRNA	B2R7N9_HUMAN	100Step_Domain_p0_to_100	0	100	100.0 AA STEP	100	0	0	0	0	0	0	0	1	0	0			0	0	0	0	0	0
N/A	cDNA; FLJ93532; highly similar to Homo sapiens osteomodulin (OMD); mRNA	B2R7N9_HUMAN	100Step_Domain_p100.0_to_200.0	100	200	100.0 AA STEP	100	21	15	13	24	17	25	-0.06	0.141	16	22	IDYGVFAK LLLGYNEISK LPNLLQLHLEHNNLEEFPFPLPK IDYGVFAK LLLGYNEISK IDYGVFAK LLLGYNEISK	IDYGVFAK LLLGYNEISK IDYGVFAK LLLGYNEISK IDYGVFAK LLLGYNEISK	12	22	12	12	16	16
N/A	cDNA; FLJ93532; highly similar to Homo sapiens osteomodulin (OMD); mRNA	B2R7N9_HUMAN	100Step_Domain_p200.0_to_300.0	200	300	100.0 AA STEP	100	4	5	0	0	2	0	0.02	1	3	1	LQDIPYNIFNLPNIVELSVGHNK LMQLNLCSNR LQDIPYNIFNLPNIVELSVGHNK	LQDIPYNIFNLPNIVELSVGHNK	2	8	0	0	2	0
N/A	cDNA; FLJ93532; highly similar to Homo sapiens osteomodulin (OMD); mRNA	B2R7N9_HUMAN	100Step_Domain_p300.0_to_400.0	300	400	100.0 AA STEP	100	4	8	15	4	9	3	0.04	0.707	9	5	NLEHLYLQNNEIEK NLEHLYLQNNEIEK NLEHLYLQNNEIEK	NLEHLYLQNNEIEK NLEHLYLQNNEIEK NLEHLYLQNNEIEK	2	12	14	2	8	2
N/A	cDNA; FLJ93532; highly similar to Homo sapiens osteomodulin (OMD); mRNA	B2R7N9_HUMAN	100Step_Domain_p400.0_to_421.0	400	421	100.0 AA STEP	21	0	0	0	0	0	0	0	1	0	0			0	0	0	0	0	0
OMD	Osteomodulin	OMD_HUMAN	LRR 1	92	113	REPEAT	21	0	0	0	0	0	0	0	1	0	0			0	0	0	0	0	0
OMD	Osteomodulin	OMD_HUMAN	LRR 2	116	129	REPEAT	13	0	0	0	0	0	0	0	1	0	0			0	0	0	0	0	0
OMD	Osteomodulin	OMD_HUMAN	LRR 3	142	164	REPEAT	22	4	0	0	0	0	0	0.0454545	1	1	0	LPNLLQLHLEHNNLEEFPFPLPK		2	0	0	0	0	0
OMD	Osteomodulin	OMD_HUMAN	LRR 4	165	184	REPEAT	19	7	5	4	16	9	12	-0.368421	0	5	12	LLLGYNEISK LLLGYNEISK LLLGYNEISK	LLLGYNEISK LLLGYNEISK LLLGYNEISK	4	8	4	8	8	8
OMD	Osteomodulin	OMD_HUMAN	LRR 5	187	210	REPEAT	23	0	0	0	0	0	0	0	1	0	0			0	0	0	0	0	0
OMD	Osteomodulin	OMD_HUMAN	LRR 6	213	233	REPEAT	20	0	1	0	0	0	0	0	1	0	0	LMQLNLCSNR		0	2	0	0	0	0
OMD	Osteomodulin	OMD_HUMAN	LRR 7	234	255	REPEAT	21	0	0	0	0	0	0	0	1	0	0			0	0	0	0	0	0
OMD	Osteomodulin	OMD_HUMAN	LRR 8	258	280	REPEAT	22	4	4	0	0	2	0	0.0909091	1	3	1	LQDIPYNIFNLPNIVELSVGHNK LQDIPYNIFNLPNIVELSVGHNK	LQDIPYNIFNLPNIVELSVGHNK	2	6	0	0	2	0
OMD	Osteomodulin	OMD_HUMAN	LRR 9	281	294	REPEAT	13	4	4	0	0	2	0	0.153846	1	3	1	LQDIPYNIFNLPNIVELSVGHNK LQDIPYNIFNLPNIVELSVGHNK	LQDIPYNIFNLPNIVELSVGHNK	2	6	0	0	2	0
OMD	Osteomodulin	OMD_HUMAN	LRR 10	301	321	REPEAT	20	4	8	15	4	9	3	0.2	0.2101	9	5	NLEHLYLQNNEIEK NLEHLYLQNNEIEK NLEHLYLQNNEIEK	NLEHLYLQNNEIEK NLEHLYLQNNEIEK NLEHLYLQNNEIEK	2	12	14	2	8	2
OMD	Osteomodulin	OMD_HUMAN	LRR 11	331	353	REPEAT	22	0	0	0	0	0	0	0	1	0	0			0	0	0	0	0	0
OMD	Osteomodulin	OMD_HUMAN	50Step_Domain_p0_to_50	0	50	50.0 AA STEP	50	0	0	0	0	0	0	0	1	0	0			0	0	0	0	0	0
OMD	Osteomodulin	OMD_HUMAN	50Step_Domain_p50.0_to_100.0	50	100	50.0 AA STEP	50	0	0	0	0	0	0	0	1	0	0			0	0	0	0	0	0
OMD	Osteomodulin	OMD_HUMAN	50Step_Domain_p100.0_to_150.0	100	150	50.0 AA STEP	50	14	9	9	8	9	12	0.02	1	11	10	IDYGVFAK LPNLLQLHLEHNNLEEFPFPLPK IDYGVFAK IDYGVFAK	IDYGVFAK IDYGVFAK IDYGVFAK	8	14	8	4	8	8
OMD	Osteomodulin	OMD_HUMAN	50Step_Domain_p150.0_to_200.0	150	200	50.0 AA STEP	50	10	5	4	16	9	12	-0.12	0.0144	6	12	LLLGYNEISK LPNLLQLHLEHNNLEEFPFPLPK LLLGYNEISK LLLGYNEISK	LLLGYNEISK LLLGYNEISK LLLGYNEISK	6	8	4	8	8	8
OMD	Osteomodulin	OMD_HUMAN	50Step_Domain_p200.0_to_250.0	200	250	50.0 AA STEP	50	0	1	0	0	0	0	0	1	0	0	LMQLNLCSNR		0	2	0	0	0	0
OMD	Osteomodulin	OMD_HUMAN	50Step_Domain_p250.0_to_300.0	250	300	50.0 AA STEP	50	4	4	0	0	2	0	0.04	1	3	1	LQDIPYNIFNLPNIVELSVGHNK LQDIPYNIFNLPNIVELSVGHNK	LQDIPYNIFNLPNIVELSVGHNK	2	6	0	0	2	0
OMD	Osteomodulin	OMD_HUMAN	50Step_Domain_p300.0_to_350.0	300	350	50.0 AA STEP	50	4	8	15	4	9	3	0.08	0.3996	9	5	NLEHLYLQNNEIEK NLEHLYLQNNEIEK NLEHLYLQNNEIEK	NLEHLYLQNNEIEK NLEHLYLQNNEIEK NLEHLYLQNNEIEK	2	12	14	2	8	2
OMD	Osteomodulin	OMD_HUMAN	50Step_Domain_p350.0_to_400.0	350	400	50.0 AA STEP	50	0	0	0	0	0	0	0	1	0	0			0	0	0	0	0	0
OMD	Osteomodulin	OMD_HUMAN	50Step_Domain_p400.0_to_421.0	400	421	50.0 AA STEP	21	0	0	0	0	0	0	0	1	0	0			0	0	0	0	0	0
OMD	Osteomodulin	OMD_HUMAN	80Step_Domain_p0_to_80	0	80	80.0 AA STEP	80	0	0	0	0	0	0	0	1	0	0			0	0	0	0	0	0
OMD	Osteomodulin	OMD_HUMAN	80Step_Domain_p80.0_to_160.0	80	160	80.0 AA STEP	80	14	9	9	8	9	12	0.0125	1	11	10	IDYGVFAK LPNLLQLHLEHNNLEEFPFPLPK IDYGVFAK IDYGVFAK	IDYGVFAK IDYGVFAK IDYGVFAK	8	14	8	4	8	8
OMD	Osteomodulin	OMD_HUMAN	80Step_Domain_p160.0_to_240.0	160	240	80.0 AA STEP	80	10	7	4	16	9	12	-0.0625	0.072	7	12	LLLGYNEISK LPNLLQLHLEHNNLEEFPFPLPK LLLGYNEISK LMQLNLCSNR LLLGYNEISK	LLLGYNEISK LLLGYNEISK LLLGYNEISK	6	10	4	8	8	8
OMD	Osteomodulin	OMD_HUMAN	80Step_Domain_p240.0_to_320.0	240	320	80.0 AA STEP	80	7	12	15	4	11	3	0.0625	0.072	11	6	LQDIPYNIFNLPNIVELSVGHNK NLEHLYLQNNEIEK LQDIPYNIFNLPNIVELSVGHNK NLEHLYLQNNEIEK NLEHLYLQNNEIEK	NLEHLYLQNNEIEK LQDIPYNIFNLPNIVELSVGHNK NLEHLYLQNNEIEK NLEHLYLQNNEIEK	4	18	14	2	10	2
OMD	Osteomodulin	OMD_HUMAN	80Step_Domain_p320.0_to_400.0	320	400	80.0 AA STEP	80	0	0	0	0	0	0	0	1	0	0			0	0	0	0	0	0
OMD	Osteomodulin	OMD_HUMAN	80Step_Domain_p400.0_to_421.0	400	421	80.0 AA STEP	21	0	0	0	0	0	0	0	1	0	0			0	0	0	0	0	0
OMD	Osteomodulin	OMD_HUMAN	100Step_Domain_p0_to_100	0	100	100.0 AA STEP	100	0	0	0	0	0	0	0	1	0	0			0	0	0	0	0	0
OMD	Osteomodulin	OMD_HUMAN	100Step_Domain_p100.0_to_200.0	100	200	100.0 AA STEP	100	21	15	13	24	17	25	-0.06	0.141	16	22	IDYGVFAK LLLGYNEISK LPNLLQLHLEHNNLEEFPFPLPK IDYGVFAK LLLGYNEISK IDYGVFAK LLLGYNEISK	IDYGVFAK LLLGYNEISK IDYGVFAK LLLGYNEISK IDYGVFAK LLLGYNEISK	12	22	12	12	16	16
OMD	Osteomodulin	OMD_HUMAN	100Step_Domain_p200.0_to_300.0	200	300	100.0 AA STEP	100	4	5	0	0	2	0	0.02	1	3	1	LQDIPYNIFNLPNIVELSVGHNK LMQLNLCSNR LQDIPYNIFNLPNIVELSVGHNK	LQDIPYNIFNLPNIVELSVGHNK	2	8	0	0	2	0
OMD	Osteomodulin	OMD_HUMAN	100Step_Domain_p300.0_to_400.0	300	400	100.0 AA STEP	100	4	8	15	4	9	3	0.04	0.707	9	5	NLEHLYLQNNEIEK NLEHLYLQNNEIEK NLEHLYLQNNEIEK	NLEHLYLQNNEIEK NLEHLYLQNNEIEK NLEHLYLQNNEIEK	2	12	14	2	8	2
OMD	Osteomodulin	OMD_HUMAN	100Step_Domain_p400.0_to_421.0	400	421	100.0 AA STEP	21	0	0	0	0	0	0	0	1	0	0			0	0	0	0	0	0
COL14A1	Collagen alpha-1(XIV) chain	COEA1_HUMAN	Nonhelical region (NC4)	1217	1458	REGIONS	241	10	10	0	0	0	0	0.0290456	0.3147	7	0	DALVSQPTR DGIDLAGFK GPGGNSAPFQLQMFDIVCSTSWANTDK ILPDTPQEPFALWEILNK NSDPLVGVILDNGGK YLHPEGLPSDYTISFLFR YLHPEGLPSDYTISFLFR		20	4	0	0	0	0
COL14A1	Collagen alpha-1(XIV) chain	COEA1_HUMAN	Triple-helical region 1 (COL2)	1459	1610	REGIONS	151	1	0	0	0	0	17	-0.0397351	0.5577	0	6	GDLQSQAMVR	GDLQSQAMVR	2	0	0	0	0	6
COL14A1	Collagen alpha-1(XIV) chain	COEA1_HUMAN	Triple-helical region 2 (COL1)	1654	1779	REGIONS	125	0	0	0	0	0	0	0	1	0	0			0	0	0	0	0	0
COL14A1	Collagen alpha-1(XIV) chain	COEA1_HUMAN	Fibronectin type-III 1	32	122	DOMAINS	90	1	0	0	7	2	11	-0.0777778	0.3165	0	7	TNQLNLQNTATK	LLVTPTSGGK TNQLNLQNTATK LLVTPTSGGK LLVTPTSGGK TNQLNLQNTATK	2	0	0	8	2	4
COL14A1	Collagen alpha-1(XIV) chain	COEA1_HUMAN	VWFA 1	158	330	DOMAINS	172	4	10	0	7	13	6	-0.0232558	1	5	9	DEVIEAVR ESGVELFAIGVK GGNTLTGLALNYIFENSFKPEAGSR IGILITDGK ESGVELFAIGVK HFLENLVTAFDVGSEK	DEVIEAVR ESGVELFAIGVK IGILITDGK IGLAQYSGDPR DEVIEAVR ESGVELFAIGVK IGILITDGK SQDDIIPPSR IGILITDGK	8	4	0	8	14	2
COL14A1	Collagen alpha-1(XIV) chain	COEA1_HUMAN	Fibronectin type-III 2	355	444	DOMAINS	89	1	0	0	0	4	0	-0.011236	1	0	1	ASAHAITGPPTELITSEVTAR	ASAHAITGPPTELITSEVTAR	2	0	0	0	4	0
COL14A1	Collagen alpha-1(XIV) chain	COEA1_HUMAN	Fibronectin type-III 3	445	536	DOMAINS	91	0	0	0	0	0	0	0	1	0	0			0	0	0	0	0	0
COL14A1	Collagen alpha-1(XIV) chain	COEA1_HUMAN	Fibronectin type-III 4	537	626	DOMAINS	89	4	0	0	7	0	0	-0.011236	1	1	2	IVYNNADGTEINEVEVDPITTFPLK LTWDPTSR	IVYNNADGTEINEVEVDPITTFPLK	8	0	0	8	0	0
COL14A1	Collagen alpha-1(XIV) chain	COEA1_HUMAN	Fibronectin type-III 5	627	715	DOMAINS	88	2	5	0	0	2	0	0.0113636	1	2	1	VTWHPLSADEGLHK VTWHPLSADEGLHK	LMWIPVYGGK	4	2	0	0	2	0
COL14A1	Collagen alpha-1(XIV) chain	COEA1_HUMAN	Fibronectin type-III 6	737	829	DOMAINS	92	5	5	0	11	9	6	-0.0652174	0.7605	3	9	NLVVGDETTSSLR TLPSSGPQNLR VTVTPIYTDGEGVSVSAPGK NLVVGDETTSSLR	NLVVGDETTSSLR VTVTPIYTDGEGVSVSAPGK WDISDSDVQQFR NLVVGDETTSSLR VTVTPIYTDGEGVSVSAPGK WDISDSDVQQFR NLVVGDETTSSLR	10	2	0	12	10	2
COL14A1	Collagen alpha-1(XIV) chain	COEA1_HUMAN	Fibronectin type-III 7	831	921	DOMAINS	90	7	0	0	7	2	0	-0.0111111	1	2	3	IFASQASGFSDALTGMVK TLFLGVTNLQAK TLPSSGPQNLR VSEEWYNR	IFASQASGFSDALTGMVK ITWDPPSSPVK VSEEWYNR ITWDPPSSPVK	14	0	0	8	2	0
COL14A1	Collagen alpha-1(XIV) chain	COEA1_HUMAN	Fibronectin type-III 8	922	1010	DOMAINS	88	3	5	0	2	7	0	0	1	3	3	LQEIEGPSVSIMEK TLFLGVTNLQAK VVIESLQDR VVIESLQDR	LQEIEGPSVSIMEK LQEIEGPSVSIMEK VVIESLQDR	6	2	0	2	8	0
COL14A1	Collagen alpha-1(XIV) chain	COEA1_HUMAN	VWFA 2	1032	1205	DOMAINS	173	8	10	0	2	6	6	0.00578035	1	6	5	ETLLDAIK IGTDGTQVAMVQFTDDPR VIVVITDGR DTLFTAESGTR ETLLDAIK	ETLLDAIK DTLFTAESGTR VIVVITDGR DTLFTAESGTR	16	4	0	2	6	2
COL14A1	Collagen alpha-1(XIV) chain	COEA1_HUMAN	Laminin G-like	1229	1424	DOMAINS	195	10	10	0	0	0	0	0.0358974	0.2325	7	0	DALVSQPTR DGIDLAGFK GPGGNSAPFQLQMFDIVCSTSWANTDK ILPDTPQEPFALWEILNK NSDPLVGVILDNGGK YLHPEGLPSDYTISFLFR YLHPEGLPSDYTISFLFR		20	4	0	0	0	0
COL14A1	Collagen alpha-1(XIV) chain	COEA1_HUMAN	Collagen-like 1	1462	1510	DOMAINS	48	0	0	0	0	0	0	0	1	0	0			0	0	0	0	0	0
COL14A1	Collagen alpha-1(XIV) chain	COEA1_HUMAN	Collagen-like 2	1514	1570	DOMAINS	56	0	0	0	0	0	0	0	1	0	0			0	0	0	0	0	0
COL14A1	Collagen alpha-1(XIV) chain	COEA1_HUMAN	Collagen-like 3	1571	1609	DOMAINS	38	1	0	0	0	0	17	-0.157895	0.7605	0	6	GDLQSQAMVR	GDLQSQAMVR	2	0	0	0	0	6
COL14A1	Collagen alpha-1(XIV) chain	COEA1_HUMAN	Collagen-like 4	1653	1705	DOMAINS	52	0	0	0	0	0	0	0	1	0	0			0	0	0	0	0	0
COL14A1	Collagen alpha-1(XIV) chain	COEA1_HUMAN	50Step_Domain_p0_to_50	0	50	50.0 AA STEP	50	0	0	0	0	0	0	0	1	0	0			0	0	0	0	0	0
COL14A1	Collagen alpha-1(XIV) chain	COEA1_HUMAN	50Step_Domain_p50.0_to_100.0	50	100	50.0 AA STEP	50	1	0	0	7	2	11	-0.14	0.036	0	7	TNQLNLQNTATK	LLVTPTSGGK TNQLNLQNTATK LLVTPTSGGK LLVTPTSGGK TNQLNLQNTATK	2	0	0	8	2	4
COL14A1	Collagen alpha-1(XIV) chain	COEA1_HUMAN	50Step_Domain_p100.0_to_150.0	100	150	50.0 AA STEP	50	0	0	0	0	0	0	0	1	0	0			0	0	0	0	0	0
COL14A1	Collagen alpha-1(XIV) chain	COEA1_HUMAN	50Step_Domain_p150.0_to_200.0	150	200	50.0 AA STEP	50	0	5	0	2	0	0	0.02	1	2	1	HFLENLVTAFDVGSEK	IGLAQYSGDPR	0	2	0	2	0	0
COL14A1	Collagen alpha-1(XIV) chain	COEA1_HUMAN	50Step_Domain_p200.0_to_250.0	200	250	50.0 AA STEP	50	2	0	0	4	2	0	-0.02	1	1	2	DEVIEAVR GGNTLTGLALNYIFENSFKPEAGSR	DEVIEAVR IGLAQYSGDPR DEVIEAVR	4	0	0	4	2	0
COL14A1	Collagen alpha-1(XIV) chain	COEA1_HUMAN	50Step_Domain_p250.0_to_300.0	250	300	50.0 AA STEP	50	3	5	0	4	11	6	-0.08	0.8388	3	7	ESGVELFAIGVK GGNTLTGLALNYIFENSFKPEAGSR IGILITDGK ESGVELFAIGVK	ESGVELFAIGVK IGILITDGK ESGVELFAIGVK IGILITDGK SQDDIIPPSR IGILITDGK	6	2	0	4	12	2
COL14A1	Collagen alpha-1(XIV) chain	COEA1_HUMAN	50Step_Domain_p300.0_to_350.0	300	350	50.0 AA STEP	50	1	0	0	0	4	0	-0.02	1	0	1	ASAHAITGPPTELITSEVTAR	ASAHAITGPPTELITSEVTAR	2	0	0	0	4	0
COL14A1	Collagen alpha-1(XIV) chain	COEA1_HUMAN	50Step_Domain_p350.0_to_400.0	350	400	50.0 AA STEP	50	1	0	0	0	4	0	-0.02	1	0	1	ASAHAITGPPTELITSEVTAR	ASAHAITGPPTELITSEVTAR	2	0	0	0	4	0
COL14A1	Collagen alpha-1(XIV) chain	COEA1_HUMAN	50Step_Domain_p400.0_to_450.0	400	450	50.0 AA STEP	50	0	0	0	0	0	0	0	1	0	0			0	0	0	0	0	0
COL14A1	Collagen alpha-1(XIV) chain	COEA1_HUMAN	50Step_Domain_p450.0_to_500.0	450	500	50.0 AA STEP	50	0	0	0	0	0	0	0	1	0	0			0	0	0	0	0	0
COL14A1	Collagen alpha-1(XIV) chain	COEA1_HUMAN	50Step_Domain_p500.0_to_550.0	500	550	50.0 AA STEP	50	0	0	0	0	0	0	0	1	0	0			0	0	0	0	0	0
COL14A1	Collagen alpha-1(XIV) chain	COEA1_HUMAN	50Step_Domain_p550.0_to_600.0	550	600	50.0 AA STEP	50	4	0	0	7	0	0	-0.02	1	1	2	IVYNNADGTEINEVEVDPITTFPLK LTWDPTSR	IVYNNADGTEINEVEVDPITTFPLK	8	0	0	8	0	0
COL14A1	Collagen alpha-1(XIV) chain	COEA1_HUMAN	50Step_Domain_p600.0_to_650.0	600	650	50.0 AA STEP	50	2	5	0	0	0	0	0.04	1	2	0	VTWHPLSADEGLHK VTWHPLSADEGLHK		4	2	0	0	0	0
COL14A1	Collagen alpha-1(XIV) chain	COEA1_HUMAN	50Step_Domain_p650.0_to_700.0	650	700	50.0 AA STEP	50	2	5	0	0	2	0	0.02	1	2	1	VTWHPLSADEGLHK VTWHPLSADEGLHK	LMWIPVYGGK	4	2	0	0	2	0
COL14A1	Collagen alpha-1(XIV) chain	COEA1_HUMAN	50Step_Domain_p700.0_to_750.0	700	750	50.0 AA STEP	50	1	5	0	2	2	6	-0.02	1	2	3	NLVVGDETTSSLR NLVVGDETTSSLR	NLVVGDETTSSLR NLVVGDETTSSLR NLVVGDETTSSLR	2	2	0	2	2	2
COL14A1	Collagen alpha-1(XIV) chain	COEA1_HUMAN	50Step_Domain_p750.0_to_800.0	750	800	50.0 AA STEP	50	1	5	0	6	4	6	-0.06	1	2	5	NLVVGDETTSSLR NLVVGDETTSSLR	NLVVGDETTSSLR WDISDSDVQQFR NLVVGDETTSSLR WDISDSDVQQFR NLVVGDETTSSLR	2	2	0	6	4	2
COL14A1	Collagen alpha-1(XIV) chain	COEA1_HUMAN	50Step_Domain_p800.0_to_850.0	800	850	50.0 AA STEP	50	6	0	0	9	7	0	-0.06	1	2	5	TLPSSGPQNLR VSEEWYNR VTVTPIYTDGEGVSVSAPGK	ITWDPPSSPVK VSEEWYNR VTVTPIYTDGEGVSVSAPGK ITWDPPSSPVK VTVTPIYTDGEGVSVSAPGK	12	0	0	10	8	0
COL14A1	Collagen alpha-1(XIV) chain	COEA1_HUMAN	50Step_Domain_p850.0_to_900.0	850	900	50.0 AA STEP	50	3	0	0	6	2	0	-0.04	1	1	3	IFASQASGFSDALTGMVK	IFASQASGFSDALTGMVK ITWDPPSSPVK ITWDPPSSPVK	6	0	0	6	2	0
COL14A1	Collagen alpha-1(XIV) chain	COEA1_HUMAN	50Step_Domain_p900.0_to_950.0	900	950	50.0 AA STEP	50	5	5	0	4	2	0	0.02	1	3	2	IFASQASGFSDALTGMVK TLFLGVTNLQAK VVIESLQDR VVIESLQDR	IFASQASGFSDALTGMVK VVIESLQDR	10	2	0	4	2	0
COL14A1	Collagen alpha-1(XIV) chain	COEA1_HUMAN	50Step_Domain_p950.0_to_1000.0	950	1000	50.0 AA STEP	50	2	5	0	2	7	0	-0.02	1	2	3	LQEIEGPSVSIMEK VVIESLQDR VVIESLQDR	LQEIEGPSVSIMEK LQEIEGPSVSIMEK VVIESLQDR	4	2	0	2	8	0
COL14A1	Collagen alpha-1(XIV) chain	COEA1_HUMAN	50Step_Domain_p1000.0_to_1050.0	1000	1050	50.0 AA STEP	50	1	0	0	2	6	0	-0.06	1	0	3	LQEIEGPSVSIMEK	LQEIEGPSVSIMEK LQEIEGPSVSIMEK	2	0	0	2	6	0
COL14A1	Collagen alpha-1(XIV) chain	COEA1_HUMAN	50Step_Domain_p1050.0_to_1100.0	1050	1100	50.0 AA STEP	50	7	5	0	2	0	0	0.06	1	4	1	ETLLDAIK IGTDGTQVAMVQFTDDPR ETLLDAIK	ETLLDAIK	14	2	0	2	0	0
COL14A1	Collagen alpha-1(XIV) chain	COEA1_HUMAN	50Step_Domain_p1100.0_to_1150.0	1100	1150	50.0 AA STEP	50	3	10	0	2	6	6	-0.02	1	4	5	ETLLDAIK VIVVITDGR DTLFTAESGTR ETLLDAIK	ETLLDAIK DTLFTAESGTR VIVVITDGR DTLFTAESGTR	6	4	0	2	6	2
COL14A1	Collagen alpha-1(XIV) chain	COEA1_HUMAN	50Step_Domain_p1150.0_to_1200.0	1150	1200	50.0 AA STEP	50	0	0	0	0	0	0	0	1	0	0			0	0	0	0	0	0
COL14A1	Collagen alpha-1(XIV) chain	COEA1_HUMAN	50Step_Domain_p1200.0_to_1250.0	1200	1250	50.0 AA STEP	50	2	0	0	0	0	0	0.02	1	1	0	DGIDLAGFK		4	0	0	0	0	0
COL14A1	Collagen alpha-1(XIV) chain	COEA1_HUMAN	50Step_Domain_p1250.0_to_1300.0	1250	1300	50.0 AA STEP	50	6	10	0	0	0	0	0.1	0.1944	5	0	DALVSQPTR ILPDTPQEPFALWEILNK YLHPEGLPSDYTISFLFR YLHPEGLPSDYTISFLFR		12	4	0	0	0	0
COL14A1	Collagen alpha-1(XIV) chain	COEA1_HUMAN	50Step_Domain_p1300.0_to_1350.0	1300	1350	50.0 AA STEP	50	4	0	0	0	0	0	0.02	1	1	0	ILPDTPQEPFALWEILNK NSDPLVGVILDNGGK		8	0	0	0	0	0
COL14A1	Collagen alpha-1(XIV) chain	COEA1_HUMAN	50Step_Domain_p1350.0_to_1400.0	1350	1400	50.0 AA STEP	50	0	0	0	0	0	0	0	1	0	0			0	0	0	0	0	0
COL14A1	Collagen alpha-1(XIV) chain	COEA1_HUMAN	50Step_Domain_p1400.0_to_1450.0	1400	1450	50.0 AA STEP	50	1	0	0	0	0	0	0	1	0	0	GPGGNSAPFQLQMFDIVCSTSWANTDK		2	0	0	0	0	0
COL14A1	Collagen alpha-1(XIV) chain	COEA1_HUMAN	50Step_Domain_p1450.0_to_1500.0	1450	1500	50.0 AA STEP	50	0	0	0	0	0	0	0	1	0	0			0	0	0	0	0	0
COL14A1	Collagen alpha-1(XIV) chain	COEA1_HUMAN	50Step_Domain_p1500.0_to_1550.0	1500	1550	50.0 AA STEP	50	0	0	0	0	0	0	0	1	0	0			0	0	0	0	0	0
COL14A1	Collagen alpha-1(XIV) chain	COEA1_HUMAN	50Step_Domain_p1550.0_to_1600.0	1550	1600	50.0 AA STEP	50	0	0	0	0	0	0	0	1	0	0			0	0	0	0	0	0
COL14A1	Collagen alpha-1(XIV) chain	COEA1_HUMAN	50Step_Domain_p1600.0_to_1650.0	1600	1650	50.0 AA STEP	50	1	0	0	0	0	17	-0.12	0.1944	0	6	GDLQSQAMVR	GDLQSQAMVR	2	0	0	0	0	6
COL14A1	Collagen alpha-1(XIV) chain	COEA1_HUMAN	50Step_Domain_p1650.0_to_1700.0	1650	1700	50.0 AA STEP	50	0	0	0	0	0	0	0	1	0	0			0	0	0	0	0	0
COL14A1	Collagen alpha-1(XIV) chain	COEA1_HUMAN	50Step_Domain_p1700.0_to_1750.0	1700	1750	50.0 AA STEP	50	0	0	0	0	0	0	0	1	0	0			0	0	0	0	0	0
COL14A1	Collagen alpha-1(XIV) chain	COEA1_HUMAN	50Step_Domain_p1750.0_to_1796.0	1750	1796	50.0 AA STEP	46	0	0	0	0	0	0	0	1	0	0			0	0	0	0	0	0
COL14A1	Collagen alpha-1(XIV) chain	COEA1_HUMAN	80Step_Domain_p0_to_80	0	80	80.0 AA STEP	80	1	0	0	7	2	11	-0.0875	0.1242	0	7	TNQLNLQNTATK	LLVTPTSGGK TNQLNLQNTATK LLVTPTSGGK LLVTPTSGGK TNQLNLQNTATK	2	0	0	8	2	4
COL14A1	Collagen alpha-1(XIV) chain	COEA1_HUMAN	80Step_Domain_p80.0_to_160.0	80	160	80.0 AA STEP	80	1	0	0	6	0	6	-0.05	1	0	4	TNQLNLQNTATK	TNQLNLQNTATK TNQLNLQNTATK	2	0	0	6	0	2
COL14A1	Collagen alpha-1(XIV) chain	COEA1_HUMAN	80Step_Domain_p160.0_to_240.0	160	240	80.0 AA STEP	80	2	5	0	4	2	0	0	1	2	2	DEVIEAVR GGNTLTGLALNYIFENSFKPEAGSR HFLENLVTAFDVGSEK	DEVIEAVR IGLAQYSGDPR DEVIEAVR	4	2	0	4	2	0
COL14A1	Collagen alpha-1(XIV) chain	COEA1_HUMAN	80Step_Domain_p240.0_to_320.0	240	320	80.0 AA STEP	80	3	5	0	4	11	6	-0.05	1	3	7	ESGVELFAIGVK GGNTLTGLALNYIFENSFKPEAGSR IGILITDGK ESGVELFAIGVK	ESGVELFAIGVK IGILITDGK ESGVELFAIGVK IGILITDGK SQDDIIPPSR IGILITDGK	6	2	0	4	12	2
COL14A1	Collagen alpha-1(XIV) chain	COEA1_HUMAN	80Step_Domain_p320.0_to_400.0	320	400	80.0 AA STEP	80	1	0	0	0	4	0	-0.0125	1	0	1	ASAHAITGPPTELITSEVTAR	ASAHAITGPPTELITSEVTAR	2	0	0	0	4	0
COL14A1	Collagen alpha-1(XIV) chain	COEA1_HUMAN	80Step_Domain_p400.0_to_480.0	400	480	80.0 AA STEP	80	0	0	0	0	0	0	0	1	0	0			0	0	0	0	0	0
COL14A1	Collagen alpha-1(XIV) chain	COEA1_HUMAN	80Step_Domain_p480.0_to_560.0	480	560	80.0 AA STEP	80	1	0	0	0	0	0	0	1	0	0	LTWDPTSR		2	0	0	0	0	0
COL14A1	Collagen alpha-1(XIV) chain	COEA1_HUMAN	80Step_Domain_p560.0_to_640.0	560	640	80.0 AA STEP	80	3	0	0	7	0	0	-0.0125	1	1	2	IVYNNADGTEINEVEVDPITTFPLK	IVYNNADGTEINEVEVDPITTFPLK	6	0	0	8	0	0
COL14A1	Collagen alpha-1(XIV) chain	COEA1_HUMAN	80Step_Domain_p640.0_to_720.0	640	720	80.0 AA STEP	80	2	5	0	0	2	0	0.0125	1	2	1	VTWHPLSADEGLHK VTWHPLSADEGLHK	LMWIPVYGGK	4	2	0	0	2	0
COL14A1	Collagen alpha-1(XIV) chain	COEA1_HUMAN	80Step_Domain_p720.0_to_800.0	720	800	80.0 AA STEP	80	1	5	0	6	4	6	-0.0375	1	2	5	NLVVGDETTSSLR NLVVGDETTSSLR	NLVVGDETTSSLR WDISDSDVQQFR NLVVGDETTSSLR WDISDSDVQQFR NLVVGDETTSSLR	2	2	0	6	4	2
COL14A1	Collagen alpha-1(XIV) chain	COEA1_HUMAN	80Step_Domain_p800.0_to_880.0	800	880	80.0 AA STEP	80	6	0	0	9	7	0	-0.0375	1	2	5	TLPSSGPQNLR VSEEWYNR VTVTPIYTDGEGVSVSAPGK	ITWDPPSSPVK VSEEWYNR VTVTPIYTDGEGVSVSAPGK ITWDPPSSPVK VTVTPIYTDGEGVSVSAPGK	12	0	0	10	8	0
COL14A1	Collagen alpha-1(XIV) chain	COEA1_HUMAN	80Step_Domain_p880.0_to_960.0	880	960	80.0 AA STEP	80	5	5	0	4	2	0	0.0125	1	3	2	IFASQASGFSDALTGMVK TLFLGVTNLQAK VVIESLQDR VVIESLQDR	IFASQASGFSDALTGMVK VVIESLQDR	10	2	0	4	2	0
COL14A1	Collagen alpha-1(XIV) chain	COEA1_HUMAN	80Step_Domain_p960.0_to_1040.0	960	1040	80.0 AA STEP	80	1	0	0	2	6	0	-0.0375	1	0	3	LQEIEGPSVSIMEK	LQEIEGPSVSIMEK LQEIEGPSVSIMEK	2	0	0	2	6	0
COL14A1	Collagen alpha-1(XIV) chain	COEA1_HUMAN	80Step_Domain_p1040.0_to_1120.0	1040	1120	80.0 AA STEP	80	7	5	0	2	0	0	0.0375	1	4	1	ETLLDAIK IGTDGTQVAMVQFTDDPR ETLLDAIK	ETLLDAIK	14	2	0	2	0	0
COL14A1	Collagen alpha-1(XIV) chain	COEA1_HUMAN	80Step_Domain_p1120.0_to_1200.0	1120	1200	80.0 AA STEP	80	1	5	0	0	6	6	-0.025	1	2	4	VIVVITDGR DTLFTAESGTR	DTLFTAESGTR VIVVITDGR DTLFTAESGTR	2	2	0	0	6	2
COL14A1	Collagen alpha-1(XIV) chain	COEA1_HUMAN	80Step_Domain_p1200.0_to_1280.0	1200	1280	80.0 AA STEP	80	5	10	0	0	0	0	0.0625	0.6164	5	0	DALVSQPTR DGIDLAGFK YLHPEGLPSDYTISFLFR YLHPEGLPSDYTISFLFR		10	4	0	0	0	0
COL14A1	Collagen alpha-1(XIV) chain	COEA1_HUMAN	80Step_Domain_p1280.0_to_1360.0	1280	1360	80.0 AA STEP	80	5	10	0	0	0	0	0.0625	0.6164	5	0	ILPDTPQEPFALWEILNK NSDPLVGVILDNGGK YLHPEGLPSDYTISFLFR YLHPEGLPSDYTISFLFR		10	4	0	0	0	0
COL14A1	Collagen alpha-1(XIV) chain	COEA1_HUMAN	80Step_Domain_p1360.0_to_1440.0	1360	1440	80.0 AA STEP	80	1	0	0	0	0	0	0	1	0	0	GPGGNSAPFQLQMFDIVCSTSWANTDK		2	0	0	0	0	0
COL14A1	Collagen alpha-1(XIV) chain	COEA1_HUMAN	80Step_Domain_p1440.0_to_1520.0	1440	1520	80.0 AA STEP	80	0	0	0	0	0	0	0	1	0	0			0	0	0	0	0	0
COL14A1	Collagen alpha-1(XIV) chain	COEA1_HUMAN	80Step_Domain_p1520.0_to_1600.0	1520	1600	80.0 AA STEP	80	0	0	0	0	0	0	0	1	0	0			0	0	0	0	0	0
COL14A1	Collagen alpha-1(XIV) chain	COEA1_HUMAN	80Step_Domain_p1600.0_to_1680.0	1600	1680	80.0 AA STEP	80	1	0	0	0	0	17	-0.075	0.4232	0	6	GDLQSQAMVR	GDLQSQAMVR	2	0	0	0	0	6
COL14A1	Collagen alpha-1(XIV) chain	COEA1_HUMAN	80Step_Domain_p1680.0_to_1760.0	1680	1760	80.0 AA STEP	80	0	0	0	0	0	0	0	1	0	0			0	0	0	0	0	0
COL14A1	Collagen alpha-1(XIV) chain	COEA1_HUMAN	80Step_Domain_p1760.0_to_1796.0	1760	1796	80.0 AA STEP	36	0	0	0	0	0	0	0	1	0	0			0	0	0	0	0	0
COL14A1	Collagen alpha-1(XIV) chain	COEA1_HUMAN	100Step_Domain_p0_to_100	0	100	100.0 AA STEP	100	1	0	0	7	2	11	-0.07	0.3438	0	7	TNQLNLQNTATK	LLVTPTSGGK TNQLNLQNTATK LLVTPTSGGK LLVTPTSGGK TNQLNLQNTATK	2	0	0	8	2	4
COL14A1	Collagen alpha-1(XIV) chain	COEA1_HUMAN	100Step_Domain_p100.0_to_200.0	100	200	100.0 AA STEP	100	0	5	0	2	0	0	0.01	1	2	1	HFLENLVTAFDVGSEK	IGLAQYSGDPR	0	2	0	2	0	0
COL14A1	Collagen alpha-1(XIV) chain	COEA1_HUMAN	100Step_Domain_p200.0_to_300.0	200	300	100.0 AA STEP	100	4	5	0	7	13	6	-0.06	0.6354	3	9	DEVIEAVR ESGVELFAIGVK GGNTLTGLALNYIFENSFKPEAGSR IGILITDGK ESGVELFAIGVK	DEVIEAVR ESGVELFAIGVK IGILITDGK IGLAQYSGDPR DEVIEAVR ESGVELFAIGVK IGILITDGK SQDDIIPPSR IGILITDGK	8	2	0	8	14	2
COL14A1	Collagen alpha-1(XIV) chain	COEA1_HUMAN	100Step_Domain_p300.0_to_400.0	300	400	100.0 AA STEP	100	1	0	0	0	4	0	-0.01	1	0	1	ASAHAITGPPTELITSEVTAR	ASAHAITGPPTELITSEVTAR	2	0	0	0	4	0
COL14A1	Collagen alpha-1(XIV) chain	COEA1_HUMAN	100Step_Domain_p400.0_to_500.0	400	500	100.0 AA STEP	100	0	0	0	0	0	0	0	1	0	0			0	0	0	0	0	0
COL14A1	Collagen alpha-1(XIV) chain	COEA1_HUMAN	100Step_Domain_p500.0_to_600.0	500	600	100.0 AA STEP	100	4	0	0	7	0	0	-0.01	1	1	2	IVYNNADGTEINEVEVDPITTFPLK LTWDPTSR	IVYNNADGTEINEVEVDPITTFPLK	8	0	0	8	0	0
COL14A1	Collagen alpha-1(XIV) chain	COEA1_HUMAN	100Step_Domain_p600.0_to_700.0	600	700	100.0 AA STEP	100	2	5	0	0	2	0	0.01	1	2	1	VTWHPLSADEGLHK VTWHPLSADEGLHK	LMWIPVYGGK	4	2	0	0	2	0
COL14A1	Collagen alpha-1(XIV) chain	COEA1_HUMAN	100Step_Domain_p700.0_to_800.0	700	800	100.0 AA STEP	100	1	5	0	6	4	6	-0.03	1	2	5	NLVVGDETTSSLR NLVVGDETTSSLR	NLVVGDETTSSLR WDISDSDVQQFR NLVVGDETTSSLR WDISDSDVQQFR NLVVGDETTSSLR	2	2	0	6	4	2
COL14A1	Collagen alpha-1(XIV) chain	COEA1_HUMAN	100Step_Domain_p800.0_to_900.0	800	900	100.0 AA STEP	100	9	0	0	13	7	0	-0.04	1	3	7	IFASQASGFSDALTGMVK TLPSSGPQNLR VSEEWYNR VTVTPIYTDGEGVSVSAPGK	IFASQASGFSDALTGMVK ITWDPPSSPVK VSEEWYNR VTVTPIYTDGEGVSVSAPGK ITWDPPSSPVK VTVTPIYTDGEGVSVSAPGK	18	0	0	14	8	0
COL14A1	Collagen alpha-1(XIV) chain	COEA1_HUMAN	100Step_Domain_p900.0_to_1000.0	900	1000	100.0 AA STEP	100	6	5	0	6	7	0	0	1	4	4	IFASQASGFSDALTGMVK LQEIEGPSVSIMEK TLFLGVTNLQAK VVIESLQDR VVIESLQDR	IFASQASGFSDALTGMVK LQEIEGPSVSIMEK LQEIEGPSVSIMEK VVIESLQDR	12	2	0	6	8	0
COL14A1	Collagen alpha-1(XIV) chain	COEA1_HUMAN	100Step_Domain_p1000.0_to_1100.0	1000	1100	100.0 AA STEP	100	8	5	0	4	6	0	0.01	1	4	3	ETLLDAIK IGTDGTQVAMVQFTDDPR LQEIEGPSVSIMEK ETLLDAIK	ETLLDAIK LQEIEGPSVSIMEK LQEIEGPSVSIMEK	16	2	0	4	6	0
COL14A1	Collagen alpha-1(XIV) chain	COEA1_HUMAN	100Step_Domain_p1100.0_to_1200.0	1100	1200	100.0 AA STEP	100	3	10	0	2	6	6	-0.01	1	4	5	ETLLDAIK VIVVITDGR DTLFTAESGTR ETLLDAIK	ETLLDAIK DTLFTAESGTR VIVVITDGR DTLFTAESGTR	6	4	0	2	6	2
COL14A1	Collagen alpha-1(XIV) chain	COEA1_HUMAN	100Step_Domain_p1200.0_to_1300.0	1200	1300	100.0 AA STEP	100	8	10	0	0	0	0	0.06	0.4698	6	0	DALVSQPTR DGIDLAGFK ILPDTPQEPFALWEILNK YLHPEGLPSDYTISFLFR YLHPEGLPSDYTISFLFR		16	4	0	0	0	0
COL14A1	Collagen alpha-1(XIV) chain	COEA1_HUMAN	100Step_Domain_p1300.0_to_1400.0	1300	1400	100.0 AA STEP	100	4	0	0	0	0	0	0.01	1	1	0	ILPDTPQEPFALWEILNK NSDPLVGVILDNGGK		8	0	0	0	0	0
COL14A1	Collagen alpha-1(XIV) chain	COEA1_HUMAN	100Step_Domain_p1400.0_to_1500.0	1400	1500	100.0 AA STEP	100	1	0	0	0	0	0	0	1	0	0	GPGGNSAPFQLQMFDIVCSTSWANTDK		2	0	0	0	0	0
COL14A1	Collagen alpha-1(XIV) chain	COEA1_HUMAN	100Step_Domain_p1500.0_to_1600.0	1500	1600	100.0 AA STEP	100	0	0	0	0	0	0	0	1	0	0			0	0	0	0	0	0
COL14A1	Collagen alpha-1(XIV) chain	COEA1_HUMAN	100Step_Domain_p1600.0_to_1700.0	1600	1700	100.0 AA STEP	100	1	0	0	0	0	17	-0.06	0.8496	0	6	GDLQSQAMVR	GDLQSQAMVR	2	0	0	0	0	6
COL14A1	Collagen alpha-1(XIV) chain	COEA1_HUMAN	100Step_Domain_p1700.0_to_1796.0	1700	1796	100.0 AA STEP	96	0	0	0	0	0	0	0	1	0	0			0	0	0	0	0	0
CPB2	Carboxypeptidase B2	CBPB2_HUMAN	Substrate binding	181	184	REGIONS	3	0	0	0	0	0	0	0	1	0	0			0	0	0	0	0	0
CPB2	Carboxypeptidase B2	CBPB2_HUMAN	Substrate binding_256_257	256	257	REGIONS	1	0	0	0	0	0	0	0	1	0	0			0	0	0	0	0	0
CPB2	Carboxypeptidase B2	CBPB2_HUMAN	Substrate binding_311_312	311	312	REGIONS	1	0	0	0	0	0	0	0	1	0	0			0	0	0	0	0	0
CPB2	Carboxypeptidase B2	CBPB2_HUMAN	50Step_Domain_p0_to_50	0	50	50.0 AA STEP	50	0	0	0	0	0	0	0	1	0	0			0	0	0	0	0	0
CPB2	Carboxypeptidase B2	CBPB2_HUMAN	50Step_Domain_p50.0_to_100.0	50	100	50.0 AA STEP	50	0	0	0	0	0	0	0	1	0	0			0	0	0	0	0	0
CPB2	Carboxypeptidase B2	CBPB2_HUMAN	50Step_Domain_p100.0_to_150.0	100	150	50.0 AA STEP	50	1	0	0	0	0	0	0	1	0	0	IHIGSSFEK		2	0	0	0	0	0
CPB2	Carboxypeptidase B2	CBPB2_HUMAN	50Step_Domain_p150.0_to_200.0	150	200	50.0 AA STEP	50	1	0	0	0	0	0	0	1	0	0	IHIGSSFEK		2	0	0	0	0	0
CPB2	Carboxypeptidase B2	CBPB2_HUMAN	50Step_Domain_p200.0_to_250.0	200	250	50.0 AA STEP	50	4	0	0	0	0	0	0.02	1	1	0	LVDFYVMPVVNVDGYDYSWK SFYANNHCIGTDLNR		8	0	0	0	0	0
CPB2	Carboxypeptidase B2	CBPB2_HUMAN	50Step_Domain_p250.0_to_300.0	250	300	50.0 AA STEP	50	1	0	0	0	0	0	0	1	0	0	SFYANNHCIGTDLNR		2	0	0	0	0	0
CPB2	Carboxypeptidase B2	CBPB2_HUMAN	50Step_Domain_p300.0_to_350.0	300	350	50.0 AA STEP	50	4	0	0	0	0	0	0.02	1	1	0	DHEELSLVASEAVR SKDHEELSLVASEAVR		8	0	0	0	0	0
CPB2	Carboxypeptidase B2	CBPB2_HUMAN	50Step_Domain_p350.0_to_400.0	350	400	50.0 AA STEP	50	5	14	0	0	0	0	0.12	0.0018	6	0	DTGTYGFLLPER YSFTIELR YTHGHGSETLYLAPGGGDDWIYDLGIK DTGTYGFLLPER YSFTIELR YTHGHGSETLYLAPGGGDDWIYDLGIK		10	8	0	0	0	0
CPB2	Carboxypeptidase B2	CBPB2_HUMAN	50Step_Domain_p400.0_to_423.0	400	423	50.0 AA STEP	23	0	0	0	0	0	0	0	1	0	0			0	0	0	0	0	0
CPB2	Carboxypeptidase B2	CBPB2_HUMAN	80Step_Domain_p0_to_80	0	80	80.0 AA STEP	80	0	0	0	0	0	0	0	1	0	0			0	0	0	0	0	0
CPB2	Carboxypeptidase B2	CBPB2_HUMAN	80Step_Domain_p80.0_to_160.0	80	160	80.0 AA STEP	80	1	0	0	0	0	0	0	1	0	0	IHIGSSFEK		2	0	0	0	0	0
CPB2	Carboxypeptidase B2	CBPB2_HUMAN	80Step_Domain_p160.0_to_240.0	160	240	80.0 AA STEP	80	3	0	0	0	0	0	0.0125	1	1	0	LVDFYVMPVVNVDGYDYSWK		6	0	0	0	0	0
CPB2	Carboxypeptidase B2	CBPB2_HUMAN	80Step_Domain_p240.0_to_320.0	240	320	80.0 AA STEP	80	1	0	0	0	0	0	0	1	0	0	SFYANNHCIGTDLNR		2	0	0	0	0	0
CPB2	Carboxypeptidase B2	CBPB2_HUMAN	80Step_Domain_p320.0_to_400.0	320	400	80.0 AA STEP	80	9	14	0	0	0	0	0.1	0.0012	8	0	DHEELSLVASEAVR DTGTYGFLLPER SKDHEELSLVASEAVR YSFTIELR YTHGHGSETLYLAPGGGDDWIYDLGIK DTGTYGFLLPER YSFTIELR YTHGHGSETLYLAPGGGDDWIYDLGIK		18	8	0	0	0	0
CPB2	Carboxypeptidase B2	CBPB2_HUMAN	80Step_Domain_p400.0_to_423.0	400	423	80.0 AA STEP	23	0	0	0	0	0	0	0	1	0	0			0	0	0	0	0	0
CPB2	Carboxypeptidase B2	CBPB2_HUMAN	100Step_Domain_p0_to_100	0	100	100.0 AA STEP	100	0	0	0	0	0	0	0	1	0	0			0	0	0	0	0	0
CPB2	Carboxypeptidase B2	CBPB2_HUMAN	100Step_Domain_p100.0_to_200.0	100	200	100.0 AA STEP	100	1	0	0	0	0	0	0	1	0	0	IHIGSSFEK		2	0	0	0	0	0
CPB2	Carboxypeptidase B2	CBPB2_HUMAN	100Step_Domain_p200.0_to_300.0	200	300	100.0 AA STEP	100	4	0	0	0	0	0	0.01	1	1	0	LVDFYVMPVVNVDGYDYSWK SFYANNHCIGTDLNR		8	0	0	0	0	0
CPB2	Carboxypeptidase B2	CBPB2_HUMAN	100Step_Domain_p300.0_to_400.0	300	400	100.0 AA STEP	100	9	14	0	0	0	0	0.08	0.004	8	0	DHEELSLVASEAVR DTGTYGFLLPER SKDHEELSLVASEAVR YSFTIELR YTHGHGSETLYLAPGGGDDWIYDLGIK DTGTYGFLLPER YSFTIELR YTHGHGSETLYLAPGGGDDWIYDLGIK		18	8	0	0	0	0
CPB2	Carboxypeptidase B2	CBPB2_HUMAN	100Step_Domain_p400.0_to_423.0	400	423	100.0 AA STEP	23	0	0	0	0	0	0	0	1	0	0			0	0	0	0	0	0
COL12A1	Collagen alpha-1(XII) chain	COCA1_HUMAN	Nonhelical region (NC3)	2451	2746	REGIONS	295	10	26	13	8	8	6	0.0305085	0.003	16	7	GEVQTVTFDTEEVK HVFIVDDFESFEK LLPETPSDPFAIWQITDR NFASVQGVSLESGSFPSYSAYR GEVQTVTFDTEEVK LLPETPSDPFAIWQITDR LLPETPSDPFAIWQITDR	GEVQTVTFDTEEVK HVFIVDDFESFEK LLPETPSDPFAIWQITDR NFASVQGVSLESGSFPSYSAYR LLPETPSDPFAIWQITDR GEVQTVTFDTEEVK LLPETPSDPFAIWQITDR	18	4	2	12	4	6
COL12A1	Collagen alpha-1(XII) chain	COCA1_HUMAN	Triple-helical region (COL2) with 1 imperfection	2747	2898	REGIONS	151	0	0	0	0	0	0	0	1	0	0			0	0	0	0	0	0
COL12A1	Collagen alpha-1(XII) chain	COCA1_HUMAN	Nonhelical region (NC2)	2899	2941	REGIONS	42	0	0	0	0	0	0	0	1	0	0			0	0	0	0	0	0
COL12A1	Collagen alpha-1(XII) chain	COCA1_HUMAN	Triple-helical region (COL1) with 2 imperfections	2942	3044	REGIONS	102	0	0	0	0	0	0	0	1	0	0			0	0	0	0	0	0
COL12A1	Collagen alpha-1(XII) chain	COCA1_HUMAN	Nonhelical region (NC1)	3045	3063	REGIONS	18	0	0	0	0	0	0	0	1	0	0			0	0	0	0	0	0
COL12A1	Collagen alpha-1(XII) chain	COCA1_HUMAN	Fibronectin type-III 1	27	117	DOMAINS	90	0	0	26	0	0	4	0.0888889	0.81	9	1	ITVDPTTDGPTK	ITVDPTTDGPTK	0	0	4	0	0	4
COL12A1	Collagen alpha-1(XII) chain	COCA1_HUMAN	VWFA 1	140	316	DOMAINS	176	6	13	13	13	8	11	0	1	11	11	GGNTMTGDAIDYLVK NVGVEVFSLGIK SQDEVEIPAR TEFNLNQYYQR SQDEVEIPAR VAIIITDGK	DELLAAIK GGNTMTGDAIDYLVK SQDEVEIPAR TEFNLNQYYQR VAIIITDGK VGVVQYSSDTR DELLAAIK SQDEVEIPAR DELLAAIK GGNTMTGDAIDYLVK SQDEVEIPAR TEFNLNQYYQR VGVVQYSSDTR	12	2	2	18	4	10
COL12A1	Collagen alpha-1(XII) chain	COCA1_HUMAN	Fibronectin type-III 2	336	426	DOMAINS	90	2	0	0	1	4	0	-0.0111111	1	1	2	GMTSSEPISIMEK	GMTSSEPISIMEK QHALSVGPQTTTLSVR	4	0	0	2	2	0
COL12A1	Collagen alpha-1(XII) chain	COCA1_HUMAN	VWFA 2	440	616	DOMAINS	176	11	0	0	6	4	13	-0.0227273	1	4	8	DPHTEFTLK NSDVEIFAVGVK SELEAIASPPAETHVFTVEDFDAFQR VEDIIEAINTFPYR	DPHTEFTLK SELEAIASPPAETHVFTVEDFDAFQR VEDIIEAINTFPYR SELEAIASPPAETHVFTVEDFDAFQR DPHTEFTLK NSDVEIFAVGVK VEDIIEAINTFPYR	20	0	0	8	2	12
COL12A1	Collagen alpha-1(XII) chain	COCA1_HUMAN	Fibronectin type-III 3	634	722	DOMAINS	88	1	0	0	1	4	2	-0.0227273	1	0	2	DLSFSEVTSYGFK	DLSFSEVTSYGFK DLSFSEVTSYGFK DLSFSEVTSYGFK	2	0	0	2	2	2
COL12A1	Collagen alpha-1(XII) chain	COCA1_HUMAN	Fibronectin type-III 4	725	816	DOMAINS	91	5	0	0	7	8	0	-0.032967	1	2	5	TLENLIPDTK YEVSVIPEYFSGPGTPLTGNAATEEVR	YEVSVIPEYFSGPGTPLTGNAATEEVR ITWTQAPGR	10	0	0	10	4	0
COL12A1	Collagen alpha-1(XII) chain	COCA1_HUMAN	Fibronectin type-III 5	817	905	DOMAINS	88	2	0	0	3	0	9	-0.0340909	1	1	4	QYLVTYTPVAGGETQEVTVR	LSWSGAPGK QYLVTYTPVAGGETQEVTVR GDTTNTVLQGLK QYLVTYTPVAGGETQEVTVR	4	0	0	4	0	8
COL12A1	Collagen alpha-1(XII) chain	COCA1_HUMAN	Fibronectin type-III 6	907	998	DOMAINS	91	8	13	0	7	13	6	-0.021978	1	7	9	DITDTSIGAYWTSAPGMVR ISVFATYSSGEGEPLTGDATTELSQDSK SLYDDVDTGEK	DITDTSIGAYWTSAPGMVR ISVFATYSSGEGEPLTGDATTELSQDSK SLYDDVDTGEK DITDTSIGAYWTSAPGMVR SLYDDVDTGEK GSPQDLVTK ISVFATYSSGEGEPLTGDATTELSQDSK	14	2	0	10	6	6
COL12A1	Collagen alpha-1(XII) chain	COCA1_HUMAN	Fibronectin type-III 7	999	1087	DOMAINS	88	8	0	0	3	0	9	-0.0113636	1	3	4	ISVFATYSSGEGEPLTGDATTELSQDSK LQPQTTYDITVLPIYK	ISVFATYSSGEGEPLTGDATTELSQDSK ISVFATYSSGEGEPLTGDATTELSQDSK LQPQTTYDITVLPIYK VDEETENTMR	14	0	0	4	0	8
COL12A1	Collagen alpha-1(XII) chain	COCA1_HUMAN	Fibronectin type-III 8	1089	1179	DOMAINS	90	3	0	0	4	0	4	-0.0222222	1	1	3	LGELVVGPYDNTVVLEELR VTWEPAPGEVK	LGELVVGPYDNTVVLEELR TSDPTMSSFR LGELVVGPYDNTVVLEELR TSDPTMSSFR	6	0	0	6	0	4
COL12A1	Collagen alpha-1(XII) chain	COCA1_HUMAN	VWFA 3	1199	1371	DOMAINS	172	12	26	13	10	13	13	0.0290698	1	17	12	DEGVELFAIGIK IGVLITDGK IVDDLTINLCNSVK IVEVFDIGPK MIATDPDDTHAYNVADFESLSR SLLQAVANLPYK VQIALAQYSGDPR MIATDPDDTHAYNVADFESLSR VQIALAQYSGDPR VQIALAQYSGDPR	DEGVELFAIGIK MIATDPDDTHAYNVADFESLSR SLLQAVANLPYK VQIALAQYSGDPR DEGVELFAIGIK IVEVFDIGPK MIATDPDDTHAYNVADFESLSR DEGVELFAIGIK IGVLITDGK IVEVFDIGPK MIATDPDDTHAYNVADFESLSR VQIALAQYSGDPR	22	4	2	14	6	12
COL12A1	Collagen alpha-1(XII) chain	COCA1_HUMAN	Fibronectin type-III 9	1387	1476	DOMAINS	89	2	0	0	3	0	2	-0.011236	1	1	2	DLKPETEYVVNVYSVVEDEYSEPLKGTEK VEYYPVSGGK	GPGDLEAPSNLVISER GPGDLEAPSNLVISER	4	0	0	4	0	2
COL12A1	Collagen alpha-1(XII) chain	COCA1_HUMAN	Fibronectin type-III 10	1477	1567	DOMAINS	90	0	0	0	0	0	0	0	1	0	0			0	0	0	0	0	0
COL12A1	Collagen alpha-1(XII) chain	COCA1_HUMAN	Fibronectin type-III 11	1568	1658	DOMAINS	90	0	0	0	0	0	0	0	1	0	0			0	0	0	0	0	0
COL12A1	Collagen alpha-1(XII) chain	COCA1_HUMAN	Fibronectin type-III 12	1659	1754	DOMAINS	95	5	0	0	7	13	2	-0.0526316	1	2	7	GTWDHGASDVSLYR ITEVTSEGFR	GTWDHGASDVSLYR ITEVTSEGFR ITWAPFGSSDK GTWDHGASDVSLYR ITEVTSEGFR ITWAPFGSSDK ITEVTSEGFR	10	0	0	10	6	2
COL12A1	Collagen alpha-1(XII) chain	COCA1_HUMAN	Fibronectin type-III 13	1755	1849	DOMAINS	94	4	0	13	7	8	2	0	1	6	6	ITYQPSTGEGNEQTTTIGGR LKPDTPYTITVSSLYPDGEGGR ITYQPSTGEGNEQTTTIGGR	ITYQPSTGEGNEQTTTIGGR LKPDTPYTITVSSLYPDGEGGR LKPDTPYTITVSSLYPDGEGGR ITYQPSTGEGNEQTTTIGGR	8	0	2	10	4	2
COL12A1	Collagen alpha-1(XII) chain	COCA1_HUMAN	Fibronectin type-III 14	1850	1935	DOMAINS	85	4	0	0	3	0	4	-0.0117647	1	1	2	NLQPDTSYTVTVVPVYTEGDGGR VYDPSTSTLNVR	NLQPDTSYTVTVVPVYTEGDGGR NLQPDTSYTVTVVPVYTEGDGGR	8	0	0	4	0	4
COL12A1	Collagen alpha-1(XII) chain	COCA1_HUMAN	Fibronectin type-III 15	1936	2026	DOMAINS	90	2	0	0	0	0	2	0	1	1	1	VVYSPVDGTRPSESIVVPGNTR WDPAPGPVLQYR	NVQVYNPTPNSLDVR	4	0	0	0	0	2
COL12A1	Collagen alpha-1(XII) chain	COCA1_HUMAN	Fibronectin type-III 16	2027	2117	DOMAINS	90	5	0	13	1	8	2	0.0222222	1	6	4	IIYSPTVGDPIDEYTTVPGR ITVIAVYEDGDGGHLTGNGR NNVILQPLQPDTPYK IIYSPTVGDPIDEYTTVPGR	IIYSPTVGDPIDEYTTVPGR VFGETTNSLSVAWDHADGPVQQYR IIYSPTVGDPIDEYTTVPGR	10	0	2	2	4	2
COL12A1	Collagen alpha-1(XII) chain	COCA1_HUMAN	Fibronectin type-III 17	2118	2206	DOMAINS	88	3	13	0	6	0	0	0.0340909	1	5	2	VSWDPSPSPVLGYK VSWDPSPSPVLGYK	VSWDPSPSPVLGYK	6	2	0	8	0	0
COL12A1	Collagen alpha-1(XII) chain	COCA1_HUMAN	Fibronectin type-III 18	2207	2294	DOMAINS	87	0	0	0	0	0	0	0	1	0	0			0	0	0	0	0	0
COL12A1	Collagen alpha-1(XII) chain	COCA1_HUMAN	VWFA 4	2323	2496	DOMAINS	173	6	0	0	4	0	2	0	1	2	2	HVFIVDDFESFEK VLVVVTDGR	HVFIVDDFESFEK VLTWESGMR VLVVVTDGR VLVVVTDGR	12	0	0	6	0	2
COL12A1	Collagen alpha-1(XII) chain	COCA1_HUMAN	Laminin G-like	2520	2712	DOMAINS	192	5	26	13	7	8	6	0.0416667	0.6318	15	7	GEVQTVTFDTEEVK LLPETPSDPFAIWQITDR NFASVQGVSLESGSFPSYSAYR GEVQTVTFDTEEVK LLPETPSDPFAIWQITDR LLPETPSDPFAIWQITDR	GEVQTVTFDTEEVK LLPETPSDPFAIWQITDR NFASVQGVSLESGSFPSYSAYR LLPETPSDPFAIWQITDR GEVQTVTFDTEEVK LLPETPSDPFAIWQITDR	10	4	2	10	4	6
COL12A1	Collagen alpha-1(XII) chain	COCA1_HUMAN	Collagen-like 1	2747	2798	DOMAINS	51	0	0	0	0	0	0	0	1	0	0			0	0	0	0	0	0
COL12A1	Collagen alpha-1(XII) chain	COCA1_HUMAN	Collagen-like 2	2802	2852	DOMAINS	50	0	0	0	0	0	0	0	1	0	0			0	0	0	0	0	0
COL12A1	Collagen alpha-1(XII) chain	COCA1_HUMAN	Collagen-like 3	2853	2898	DOMAINS	45	0	0	0	0	0	0	0	1	0	0			0	0	0	0	0	0
COL12A1	Collagen alpha-1(XII) chain	COCA1_HUMAN	Collagen-like 4	2941	2990	DOMAINS	49	0	0	0	0	0	0	0	1	0	0			0	0	0	0	0	0
COL12A1	Collagen alpha-1(XII) chain	COCA1_HUMAN	50Step_Domain_p0_to_50	0	50	50.0 AA STEP	50	0	0	0	0	0	0	0	1	0	0			0	0	0	0	0	0
COL12A1	Collagen alpha-1(XII) chain	COCA1_HUMAN	50Step_Domain_p50.0_to_100.0	50	100	50.0 AA STEP	50	0	0	26	0	0	4	0.16	0.341	9	1	ITVDPTTDGPTK	ITVDPTTDGPTK	0	0	4	0	0	4
COL12A1	Collagen alpha-1(XII) chain	COCA1_HUMAN	50Step_Domain_p100.0_to_150.0	100	150	50.0 AA STEP	50	0	0	0	0	0	0	0	1	0	0			0	0	0	0	0	0
COL12A1	Collagen alpha-1(XII) chain	COCA1_HUMAN	50Step_Domain_p150.0_to_200.0	150	200	50.0 AA STEP	50	1	0	0	4	0	4	-0.06	1	0	3	TEFNLNQYYQR	TEFNLNQYYQR VGVVQYSSDTR TEFNLNQYYQR VGVVQYSSDTR	2	0	0	6	0	4
COL12A1	Collagen alpha-1(XII) chain	COCA1_HUMAN	50Step_Domain_p200.0_to_250.0	200	250	50.0 AA STEP	50	2	0	13	6	4	4	0	1	5	5	GGNTMTGDAIDYLVK VAIIITDGK	DELLAAIK GGNTMTGDAIDYLVK VAIIITDGK DELLAAIK DELLAAIK GGNTMTGDAIDYLVK	4	0	2	8	2	4
COL12A1	Collagen alpha-1(XII) chain	COCA1_HUMAN	50Step_Domain_p250.0_to_300.0	250	300	50.0 AA STEP	50	3	13	13	4	4	2	0.14	1	10	3	NVGVEVFSLGIK SQDEVEIPAR SQDEVEIPAR VAIIITDGK	SQDEVEIPAR VAIIITDGK SQDEVEIPAR SQDEVEIPAR	6	2	2	6	2	2
COL12A1	Collagen alpha-1(XII) chain	COCA1_HUMAN	50Step_Domain_p300.0_to_350.0	300	350	50.0 AA STEP	50	0	0	0	0	0	0	0	1	0	0			0	0	0	0	0	0
COL12A1	Collagen alpha-1(XII) chain	COCA1_HUMAN	50Step_Domain_p350.0_to_400.0	350	400	50.0 AA STEP	50	0	0	0	0	4	0	-0.02	1	0	1		QHALSVGPQTTTLSVR	0	0	0	0	2	0
COL12A1	Collagen alpha-1(XII) chain	COCA1_HUMAN	50Step_Domain_p400.0_to_450.0	400	450	50.0 AA STEP	50	2	0	0	1	0	0	0.02	1	1	0	GMTSSEPISIMEK	GMTSSEPISIMEK	4	0	0	2	0	0
COL12A1	Collagen alpha-1(XII) chain	COCA1_HUMAN	50Step_Domain_p450.0_to_500.0	450	500	50.0 AA STEP	50	6	0	0	4	0	11	-0.06	1	2	5	DPHTEFTLK VEDIIEAINTFPYR	DPHTEFTLK VEDIIEAINTFPYR DPHTEFTLK VEDIIEAINTFPYR	12	0	0	6	0	10
COL12A1	Collagen alpha-1(XII) chain	COCA1_HUMAN	50Step_Domain_p500.0_to_550.0	500	550	50.0 AA STEP	50	5	0	0	1	0	6	0	1	2	2	VEDIIEAINTFPYR	VEDIIEAINTFPYR VEDIIEAINTFPYR	10	0	0	2	0	6
COL12A1	Collagen alpha-1(XII) chain	COCA1_HUMAN	50Step_Domain_p550.0_to_600.0	550	600	50.0 AA STEP	50	4	0	0	1	4	2	-0.02	1	1	2	NSDVEIFAVGVK SELEAIASPPAETHVFTVEDFDAFQR	SELEAIASPPAETHVFTVEDFDAFQR SELEAIASPPAETHVFTVEDFDAFQR NSDVEIFAVGVK	8	0	0	2	2	2
COL12A1	Collagen alpha-1(XII) chain	COCA1_HUMAN	50Step_Domain_p600.0_to_650.0	600	650	50.0 AA STEP	50	4	0	0	4	8	4	-0.08	1	1	5	DLSFSEVTSYGFK SELEAIASPPAETHVFTVEDFDAFQR	DLSFSEVTSYGFK IEQELAAIK SELEAIASPPAETHVFTVEDFDAFQR DLSFSEVTSYGFK SELEAIASPPAETHVFTVEDFDAFQR DLSFSEVTSYGFK IEQELAAIK	8	0	0	6	4	4
COL12A1	Collagen alpha-1(XII) chain	COCA1_HUMAN	50Step_Domain_p650.0_to_700.0	650	700	50.0 AA STEP	50	0	0	0	0	0	0	0	1	0	0			0	0	0	0	0	0
COL12A1	Collagen alpha-1(XII) chain	COCA1_HUMAN	50Step_Domain_p700.0_to_750.0	700	750	50.0 AA STEP	50	0	0	0	0	8	0	-0.06	1	0	3		ITWTQAPGR	0	0	0	0	4	0
COL12A1	Collagen alpha-1(XII) chain	COCA1_HUMAN	50Step_Domain_p750.0_to_800.0	750	800	50.0 AA STEP	50	5	0	0	7	0	0	0	1	2	2	TLENLIPDTK YEVSVIPEYFSGPGTPLTGNAATEEVR	YEVSVIPEYFSGPGTPLTGNAATEEVR	10	0	0	10	0	0
COL12A1	Collagen alpha-1(XII) chain	COCA1_HUMAN	50Step_Domain_p800.0_to_850.0	800	850	50.0 AA STEP	50	6	0	0	10	0	6	-0.06	1	2	5	QYLVTYTPVAGGETQEVTVR YEVSVIPEYFSGPGTPLTGNAATEEVR	LSWSGAPGK QYLVTYTPVAGGETQEVTVR YEVSVIPEYFSGPGTPLTGNAATEEVR QYLVTYTPVAGGETQEVTVR	12	0	0	14	0	6
COL12A1	Collagen alpha-1(XII) chain	COCA1_HUMAN	50Step_Domain_p850.0_to_900.0	850	900	50.0 AA STEP	50	2	0	0	1	0	9	-0.04	1	1	3	QYLVTYTPVAGGETQEVTVR	QYLVTYTPVAGGETQEVTVR GDTTNTVLQGLK QYLVTYTPVAGGETQEVTVR	4	0	0	2	0	8
COL12A1	Collagen alpha-1(XII) chain	COCA1_HUMAN	50Step_Domain_p900.0_to_950.0	900	950	50.0 AA STEP	50	2	13	0	4	13	2	-0.02	1	5	6	DITDTSIGAYWTSAPGMVR SLYDDVDTGEK	DITDTSIGAYWTSAPGMVR SLYDDVDTGEK DITDTSIGAYWTSAPGMVR SLYDDVDTGEK GSPQDLVTK	4	2	0	6	6	2
COL12A1	Collagen alpha-1(XII) chain	COCA1_HUMAN	50Step_Domain_p950.0_to_1000.0	950	1000	50.0 AA STEP	50	5	13	0	4	8	4	0.02	1	6	5	ISVFATYSSGEGEPLTGDATTELSQDSK SLYDDVDTGEK	ISVFATYSSGEGEPLTGDATTELSQDSK SLYDDVDTGEK SLYDDVDTGEK ISVFATYSSGEGEPLTGDATTELSQDSK	10	2	0	6	4	4
COL12A1	Collagen alpha-1(XII) chain	COCA1_HUMAN	50Step_Domain_p1000.0_to_1050.0	1000	1050	50.0 AA STEP	50	0	0	0	0	0	2	-0.02	1	0	1		VDEETENTMR	0	0	0	0	0	2
COL12A1	Collagen alpha-1(XII) chain	COCA1_HUMAN	50Step_Domain_p1050.0_to_1100.0	1050	1100	50.0 AA STEP	50	2	0	0	1	0	4	-0.02	1	1	2	LQPQTTYDITVLPIYK	TSDPTMSSFR LQPQTTYDITVLPIYK TSDPTMSSFR	4	0	0	2	0	4
COL12A1	Collagen alpha-1(XII) chain	COCA1_HUMAN	50Step_Domain_p1100.0_to_1150.0	1100	1150	50.0 AA STEP	50	3	0	0	4	0	4	-0.04	1	1	3	LGELVVGPYDNTVVLEELR VTWEPAPGEVK	LGELVVGPYDNTVVLEELR TSDPTMSSFR LGELVVGPYDNTVVLEELR TSDPTMSSFR	6	0	0	6	0	4
COL12A1	Collagen alpha-1(XII) chain	COCA1_HUMAN	50Step_Domain_p1150.0_to_1200.0	1150	1200	50.0 AA STEP	50	0	0	0	0	0	0	0	1	0	0			0	0	0	0	0	0
COL12A1	Collagen alpha-1(XII) chain	COCA1_HUMAN	50Step_Domain_p1200.0_to_1250.0	1200	1250	50.0 AA STEP	50	3	13	13	1	4	6	0.12	1	10	4	IVEVFDIGPK VQIALAQYSGDPR VQIALAQYSGDPR VQIALAQYSGDPR	VQIALAQYSGDPR IVEVFDIGPK IVEVFDIGPK VQIALAQYSGDPR	6	2	2	2	2	6
COL12A1	Collagen alpha-1(XII) chain	COCA1_HUMAN	50Step_Domain_p1250.0_to_1300.0	1250	1300	50.0 AA STEP	50	1	0	0	1	0	0	0	1	0	0	SLLQAVANLPYK	SLLQAVANLPYK	2	0	0	2	0	0
COL12A1	Collagen alpha-1(XII) chain	COCA1_HUMAN	50Step_Domain_p1300.0_to_1350.0	1300	1350	50.0 AA STEP	50	6	13	0	7	8	6	-0.02	1	6	7	DEGVELFAIGIK IGVLITDGK MIATDPDDTHAYNVADFESLSR MIATDPDDTHAYNVADFESLSR	DEGVELFAIGIK MIATDPDDTHAYNVADFESLSR DEGVELFAIGIK MIATDPDDTHAYNVADFESLSR DEGVELFAIGIK IGVLITDGK MIATDPDDTHAYNVADFESLSR	12	2	0	10	4	6
COL12A1	Collagen alpha-1(XII) chain	COCA1_HUMAN	50Step_Domain_p1350.0_to_1400.0	1350	1400	50.0 AA STEP	50	5	13	0	8	4	4	0.02	1	6	5	IVDDLTINLCNSVK MIATDPDDTHAYNVADFESLSR MIATDPDDTHAYNVADFESLSR	GPGDLEAPSNLVISER MIATDPDDTHAYNVADFESLSR MIATDPDDTHAYNVADFESLSR GPGDLEAPSNLVISER MIATDPDDTHAYNVADFESLSR	10	2	0	12	2	4
COL12A1	Collagen alpha-1(XII) chain	COCA1_HUMAN	50Step_Domain_p1400.0_to_1450.0	1400	1450	50.0 AA STEP	50	2	0	0	0	0	0	0.02	1	1	0	DLKPETEYVVNVYSVVEDEYSEPLKGTEK VEYYPVSGGK		4	0	0	0	0	0
COL12A1	Collagen alpha-1(XII) chain	COCA1_HUMAN	50Step_Domain_p1450.0_to_1500.0	1450	1500	50.0 AA STEP	50	1	0	0	0	0	0	0	1	0	0	DLKPETEYVVNVYSVVEDEYSEPLKGTEK		2	0	0	0	0	0
COL12A1	Collagen alpha-1(XII) chain	COCA1_HUMAN	50Step_Domain_p1500.0_to_1550.0	1500	1550	50.0 AA STEP	50	0	0	0	0	0	0	0	1	0	0			0	0	0	0	0	0
COL12A1	Collagen alpha-1(XII) chain	COCA1_HUMAN	50Step_Domain_p1550.0_to_1600.0	1550	1600	50.0 AA STEP	50	0	0	0	0	0	0	0	1	0	0			0	0	0	0	0	0
COL12A1	Collagen alpha-1(XII) chain	COCA1_HUMAN	50Step_Domain_p1600.0_to_1650.0	1600	1650	50.0 AA STEP	50	0	0	0	0	0	0	0	1	0	0			0	0	0	0	0	0
COL12A1	Collagen alpha-1(XII) chain	COCA1_HUMAN	50Step_Domain_p1650.0_to_1700.0	1650	1700	50.0 AA STEP	50	5	0	0	7	13	2	-0.1	1	2	7	GTWDHGASDVSLYR ITEVTSEGFR	GTWDHGASDVSLYR ITEVTSEGFR ITWAPFGSSDK GTWDHGASDVSLYR ITEVTSEGFR ITWAPFGSSDK ITEVTSEGFR	10	0	0	10	6	2
COL12A1	Collagen alpha-1(XII) chain	COCA1_HUMAN	50Step_Domain_p1700.0_to_1750.0	1700	1750	50.0 AA STEP	50	0	0	0	0	0	0	0	1	0	0			0	0	0	0	0	0
COL12A1	Collagen alpha-1(XII) chain	COCA1_HUMAN	50Step_Domain_p1750.0_to_1800.0	1750	1800	50.0 AA STEP	50	1	0	13	1	0	2	0.08	1	5	1	ITYQPSTGEGNEQTTTIGGR ITYQPSTGEGNEQTTTIGGR	ITYQPSTGEGNEQTTTIGGR ITYQPSTGEGNEQTTTIGGR	2	0	2	2	0	2
COL12A1	Collagen alpha-1(XII) chain	COCA1_HUMAN	50Step_Domain_p1800.0_to_1850.0	1800	1850	50.0 AA STEP	50	4	0	13	7	8	2	0	1	6	6	ITYQPSTGEGNEQTTTIGGR LKPDTPYTITVSSLYPDGEGGR ITYQPSTGEGNEQTTTIGGR	ITYQPSTGEGNEQTTTIGGR LKPDTPYTITVSSLYPDGEGGR LKPDTPYTITVSSLYPDGEGGR ITYQPSTGEGNEQTTTIGGR	8	0	2	10	4	2
COL12A1	Collagen alpha-1(XII) chain	COCA1_HUMAN	50Step_Domain_p1850.0_to_1900.0	1850	1900	50.0 AA STEP	50	1	0	0	0	0	0	0	1	0	0	VYDPSTSTLNVR		2	0	0	0	0	0
COL12A1	Collagen alpha-1(XII) chain	COCA1_HUMAN	50Step_Domain_p1900.0_to_1950.0	1900	1950	50.0 AA STEP	50	3	0	0	3	0	6	-0.04	1	1	3	NLQPDTSYTVTVVPVYTEGDGGR	NLQPDTSYTVTVVPVYTEGDGGR NLQPDTSYTVTVVPVYTEGDGGR NVQVYNPTPNSLDVR	6	0	0	4	0	6
COL12A1	Collagen alpha-1(XII) chain	COCA1_HUMAN	50Step_Domain_p1950.0_to_2000.0	1950	2000	50.0 AA STEP	50	2	0	0	0	0	2	0	1	1	1	VVYSPVDGTRPSESIVVPGNTR WDPAPGPVLQYR	NVQVYNPTPNSLDVR	4	0	0	0	0	2
COL12A1	Collagen alpha-1(XII) chain	COCA1_HUMAN	50Step_Domain_p2000.0_to_2050.0	2000	2050	50.0 AA STEP	50	0	0	0	0	8	0	-0.06	1	0	3		VFGETTNSLSVAWDHADGPVQQYR	0	0	0	0	4	0
COL12A1	Collagen alpha-1(XII) chain	COCA1_HUMAN	50Step_Domain_p2050.0_to_2100.0	2050	2100	50.0 AA STEP	50	5	0	13	1	8	2	0.04	1	6	4	IIYSPTVGDPIDEYTTVPGR ITVIAVYEDGDGGHLTGNGR NNVILQPLQPDTPYK IIYSPTVGDPIDEYTTVPGR	IIYSPTVGDPIDEYTTVPGR VFGETTNSLSVAWDHADGPVQQYR IIYSPTVGDPIDEYTTVPGR	10	0	2	2	4	2
COL12A1	Collagen alpha-1(XII) chain	COCA1_HUMAN	50Step_Domain_p2100.0_to_2150.0	2100	2150	50.0 AA STEP	50	4	13	0	6	0	0	0.08	1	6	2	ITVIAVYEDGDGGHLTGNGR VSWDPSPSPVLGYK VSWDPSPSPVLGYK	VSWDPSPSPVLGYK	8	2	0	8	0	0
COL12A1	Collagen alpha-1(XII) chain	COCA1_HUMAN	50Step_Domain_p2150.0_to_2200.0	2150	2200	50.0 AA STEP	50	0	0	0	0	0	0	0	1	0	0			0	0	0	0	0	0
COL12A1	Collagen alpha-1(XII) chain	COCA1_HUMAN	50Step_Domain_p2200.0_to_2250.0	2200	2250	50.0 AA STEP	50	0	0	0	0	0	0	0	1	0	0			0	0	0	0	0	0
COL12A1	Collagen alpha-1(XII) chain	COCA1_HUMAN	50Step_Domain_p2250.0_to_2300.0	2250	2300	50.0 AA STEP	50	0	0	0	0	0	0	0	1	0	0			0	0	0	0	0	0
COL12A1	Collagen alpha-1(XII) chain	COCA1_HUMAN	50Step_Domain_p2300.0_to_2350.0	2300	2350	50.0 AA STEP	50	0	0	0	0	0	0	0	1	0	0			0	0	0	0	0	0
COL12A1	Collagen alpha-1(XII) chain	COCA1_HUMAN	50Step_Domain_p2350.0_to_2400.0	2350	2400	50.0 AA STEP	50	0	0	0	0	0	0	0	1	0	0			0	0	0	0	0	0
COL12A1	Collagen alpha-1(XII) chain	COCA1_HUMAN	50Step_Domain_p2400.0_to_2450.0	2400	2450	50.0 AA STEP	50	2	0	0	3	0	2	-0.02	1	1	2	VLVVVTDGR	VLTWESGMR VLVVVTDGR VLVVVTDGR	4	0	0	4	0	2
COL12A1	Collagen alpha-1(XII) chain	COCA1_HUMAN	50Step_Domain_p2450.0_to_2500.0	2450	2500	50.0 AA STEP	50	4	0	0	1	0	0	0.02	1	1	0	HVFIVDDFESFEK	HVFIVDDFESFEK	8	0	0	2	0	0
COL12A1	Collagen alpha-1(XII) chain	COCA1_HUMAN	50Step_Domain_p2500.0_to_2550.0	2500	2550	50.0 AA STEP	50	2	0	0	3	0	0	0	1	1	1	NFASVQGVSLESGSFPSYSAYR	NFASVQGVSLESGSFPSYSAYR	4	0	0	4	0	0
COL12A1	Collagen alpha-1(XII) chain	COCA1_HUMAN	50Step_Domain_p2550.0_to_2600.0	2550	2600	50.0 AA STEP	50	4	13	13	4	8	4	0.1	1	10	5	LLPETPSDPFAIWQITDR NFASVQGVSLESGSFPSYSAYR LLPETPSDPFAIWQITDR LLPETPSDPFAIWQITDR	LLPETPSDPFAIWQITDR NFASVQGVSLESGSFPSYSAYR LLPETPSDPFAIWQITDR LLPETPSDPFAIWQITDR	8	2	2	6	4	4
COL12A1	Collagen alpha-1(XII) chain	COCA1_HUMAN	50Step_Domain_p2600.0_to_2650.0	2600	2650	50.0 AA STEP	50	3	26	13	4	8	6	0.16	0.155	14	6	GEVQTVTFDTEEVK LLPETPSDPFAIWQITDR GEVQTVTFDTEEVK LLPETPSDPFAIWQITDR LLPETPSDPFAIWQITDR	GEVQTVTFDTEEVK LLPETPSDPFAIWQITDR LLPETPSDPFAIWQITDR GEVQTVTFDTEEVK LLPETPSDPFAIWQITDR	6	4	2	6	4	6
COL12A1	Collagen alpha-1(XII) chain	COCA1_HUMAN	50Step_Domain_p2650.0_to_2700.0	2650	2700	50.0 AA STEP	50	0	0	0	0	0	0	0	1	0	0			0	0	0	0	0	0
COL12A1	Collagen alpha-1(XII) chain	COCA1_HUMAN	50Step_Domain_p2700.0_to_2750.0	2700	2750	50.0 AA STEP	50	0	0	0	0	0	0	0	1	0	0			0	0	0	0	0	0
COL12A1	Collagen alpha-1(XII) chain	COCA1_HUMAN	50Step_Domain_p2750.0_to_2800.0	2750	2800	50.0 AA STEP	50	0	0	0	0	0	0	0	1	0	0			0	0	0	0	0	0
COL12A1	Collagen alpha-1(XII) chain	COCA1_HUMAN	50Step_Domain_p2800.0_to_2850.0	2800	2850	50.0 AA STEP	50	0	0	0	0	0	0	0	1	0	0			0	0	0	0	0	0
COL12A1	Collagen alpha-1(XII) chain	COCA1_HUMAN	50Step_Domain_p2850.0_to_2900.0	2850	2900	50.0 AA STEP	50	0	0	0	0	0	0	0	1	0	0			0	0	0	0	0	0
COL12A1	Collagen alpha-1(XII) chain	COCA1_HUMAN	50Step_Domain_p2900.0_to_2950.0	2900	2950	50.0 AA STEP	50	0	0	0	0	0	0	0	1	0	0			0	0	0	0	0	0
COL12A1	Collagen alpha-1(XII) chain	COCA1_HUMAN	50Step_Domain_p2950.0_to_3000.0	2950	3000	50.0 AA STEP	50	0	0	0	0	0	0	0	1	0	0			0	0	0	0	0	0
COL12A1	Collagen alpha-1(XII) chain	COCA1_HUMAN	50Step_Domain_p3000.0_to_3050.0	3000	3050	50.0 AA STEP	50	0	0	0	0	0	0	0	1	0	0			0	0	0	0	0	0
COL12A1	Collagen alpha-1(XII) chain	COCA1_HUMAN	50Step_Domain_p3050.0_to_3063.0	3050	3063	50.0 AA STEP	13	0	0	0	0	0	0	0	1	0	0			0	0	0	0	0	0
COL12A1	Collagen alpha-1(XII) chain	COCA1_HUMAN	80Step_Domain_p0_to_80	0	80	80.0 AA STEP	80	0	0	26	0	0	4	0.1	0.6981	9	1	ITVDPTTDGPTK	ITVDPTTDGPTK	0	0	4	0	0	4
COL12A1	Collagen alpha-1(XII) chain	COCA1_HUMAN	80Step_Domain_p80.0_to_160.0	80	160	80.0 AA STEP	80	0	0	0	0	0	0	0	1	0	0			0	0	0	0	0	0
COL12A1	Collagen alpha-1(XII) chain	COCA1_HUMAN	80Step_Domain_p160.0_to_240.0	160	240	80.0 AA STEP	80	3	0	0	8	4	9	-0.075	1	1	7	GGNTMTGDAIDYLVK TEFNLNQYYQR	DELLAAIK GGNTMTGDAIDYLVK TEFNLNQYYQR VGVVQYSSDTR DELLAAIK DELLAAIK GGNTMTGDAIDYLVK TEFNLNQYYQR VGVVQYSSDTR	6	0	0	12	2	8
COL12A1	Collagen alpha-1(XII) chain	COCA1_HUMAN	80Step_Domain_p240.0_to_320.0	240	320	80.0 AA STEP	80	3	13	13	4	4	2	0.0875	1	10	3	NVGVEVFSLGIK SQDEVEIPAR SQDEVEIPAR VAIIITDGK	SQDEVEIPAR VAIIITDGK SQDEVEIPAR SQDEVEIPAR	6	2	2	6	2	2
COL12A1	Collagen alpha-1(XII) chain	COCA1_HUMAN	80Step_Domain_p320.0_to_400.0	320	400	80.0 AA STEP	80	0	0	0	0	4	0	-0.0125	1	0	1		QHALSVGPQTTTLSVR	0	0	0	0	2	0
COL12A1	Collagen alpha-1(XII) chain	COCA1_HUMAN	80Step_Domain_p400.0_to_480.0	400	480	80.0 AA STEP	80	2	0	0	1	0	0	0.0125	1	1	0	GMTSSEPISIMEK	GMTSSEPISIMEK	4	0	0	2	0	0
COL12A1	Collagen alpha-1(XII) chain	COCA1_HUMAN	80Step_Domain_p480.0_to_560.0	480	560	80.0 AA STEP	80	6	0	0	4	0	11	-0.0375	1	2	5	DPHTEFTLK VEDIIEAINTFPYR	DPHTEFTLK VEDIIEAINTFPYR DPHTEFTLK VEDIIEAINTFPYR	12	0	0	6	0	10
COL12A1	Collagen alpha-1(XII) chain	COCA1_HUMAN	80Step_Domain_p560.0_to_640.0	560	640	80.0 AA STEP	80	5	0	0	4	8	6	-0.05	1	2	6	DLSFSEVTSYGFK NSDVEIFAVGVK SELEAIASPPAETHVFTVEDFDAFQR	DLSFSEVTSYGFK IEQELAAIK SELEAIASPPAETHVFTVEDFDAFQR DLSFSEVTSYGFK SELEAIASPPAETHVFTVEDFDAFQR DLSFSEVTSYGFK IEQELAAIK NSDVEIFAVGVK	10	0	0	6	4	6
COL12A1	Collagen alpha-1(XII) chain	COCA1_HUMAN	80Step_Domain_p640.0_to_720.0	640	720	80.0 AA STEP	80	1	0	0	1	4	2	-0.025	1	0	2	DLSFSEVTSYGFK	DLSFSEVTSYGFK DLSFSEVTSYGFK DLSFSEVTSYGFK	2	0	0	2	2	2
COL12A1	Collagen alpha-1(XII) chain	COCA1_HUMAN	80Step_Domain_p720.0_to_800.0	720	800	80.0 AA STEP	80	5	0	0	7	8	0	-0.0375	1	2	5	TLENLIPDTK YEVSVIPEYFSGPGTPLTGNAATEEVR	YEVSVIPEYFSGPGTPLTGNAATEEVR ITWTQAPGR	10	0	0	10	4	0
COL12A1	Collagen alpha-1(XII) chain	COCA1_HUMAN	80Step_Domain_p800.0_to_880.0	800	880	80.0 AA STEP	80	6	0	0	10	0	9	-0.05	1	2	6	QYLVTYTPVAGGETQEVTVR YEVSVIPEYFSGPGTPLTGNAATEEVR	LSWSGAPGK QYLVTYTPVAGGETQEVTVR YEVSVIPEYFSGPGTPLTGNAATEEVR GDTTNTVLQGLK QYLVTYTPVAGGETQEVTVR	12	0	0	14	0	8
COL12A1	Collagen alpha-1(XII) chain	COCA1_HUMAN	80Step_Domain_p880.0_to_960.0	880	960	80.0 AA STEP	80	2	13	0	4	13	2	-0.0125	1	5	6	DITDTSIGAYWTSAPGMVR SLYDDVDTGEK	DITDTSIGAYWTSAPGMVR SLYDDVDTGEK DITDTSIGAYWTSAPGMVR SLYDDVDTGEK GSPQDLVTK	4	2	0	6	6	2
COL12A1	Collagen alpha-1(XII) chain	COCA1_HUMAN	80Step_Domain_p960.0_to_1040.0	960	1040	80.0 AA STEP	80	5	0	0	3	0	6	-0.0125	1	2	3	ISVFATYSSGEGEPLTGDATTELSQDSK	ISVFATYSSGEGEPLTGDATTELSQDSK ISVFATYSSGEGEPLTGDATTELSQDSK VDEETENTMR	10	0	0	4	0	6
COL12A1	Collagen alpha-1(XII) chain	COCA1_HUMAN	80Step_Domain_p1040.0_to_1120.0	1040	1120	80.0 AA STEP	80	3	0	0	1	0	4	-0.0125	1	1	2	LQPQTTYDITVLPIYK VTWEPAPGEVK	TSDPTMSSFR LQPQTTYDITVLPIYK TSDPTMSSFR	6	0	0	2	0	4
COL12A1	Collagen alpha-1(XII) chain	COCA1_HUMAN	80Step_Domain_p1120.0_to_1200.0	1120	1200	80.0 AA STEP	80	2	0	0	3	0	2	-0.0125	1	1	2	LGELVVGPYDNTVVLEELR	LGELVVGPYDNTVVLEELR LGELVVGPYDNTVVLEELR	4	0	0	4	0	2
COL12A1	Collagen alpha-1(XII) chain	COCA1_HUMAN	80Step_Domain_p1200.0_to_1280.0	1200	1280	80.0 AA STEP	80	4	13	13	3	4	6	0.075	1	10	4	IVEVFDIGPK SLLQAVANLPYK VQIALAQYSGDPR VQIALAQYSGDPR VQIALAQYSGDPR	SLLQAVANLPYK VQIALAQYSGDPR IVEVFDIGPK IVEVFDIGPK VQIALAQYSGDPR	8	2	2	4	2	6
COL12A1	Collagen alpha-1(XII) chain	COCA1_HUMAN	80Step_Domain_p1280.0_to_1360.0	1280	1360	80.0 AA STEP	80	6	13	0	7	8	6	-0.0125	1	6	7	DEGVELFAIGIK IGVLITDGK MIATDPDDTHAYNVADFESLSR MIATDPDDTHAYNVADFESLSR	DEGVELFAIGIK MIATDPDDTHAYNVADFESLSR DEGVELFAIGIK MIATDPDDTHAYNVADFESLSR DEGVELFAIGIK IGVLITDGK MIATDPDDTHAYNVADFESLSR	12	2	0	10	4	6
COL12A1	Collagen alpha-1(XII) chain	COCA1_HUMAN	80Step_Domain_p1360.0_to_1440.0	1360	1440	80.0 AA STEP	80	6	13	0	8	4	4	0.0125	1	6	5	IVDDLTINLCNSVK MIATDPDDTHAYNVADFESLSR VEYYPVSGGK MIATDPDDTHAYNVADFESLSR	GPGDLEAPSNLVISER MIATDPDDTHAYNVADFESLSR MIATDPDDTHAYNVADFESLSR GPGDLEAPSNLVISER MIATDPDDTHAYNVADFESLSR	12	2	0	12	2	4
COL12A1	Collagen alpha-1(XII) chain	COCA1_HUMAN	80Step_Domain_p1440.0_to_1520.0	1440	1520	80.0 AA STEP	80	1	0	0	0	0	0	0	1	0	0	DLKPETEYVVNVYSVVEDEYSEPLKGTEK		2	0	0	0	0	0
COL12A1	Collagen alpha-1(XII) chain	COCA1_HUMAN	80Step_Domain_p1520.0_to_1600.0	1520	1600	80.0 AA STEP	80	0	0	0	0	0	0	0	1	0	0			0	0	0	0	0	0
COL12A1	Collagen alpha-1(XII) chain	COCA1_HUMAN	80Step_Domain_p1600.0_to_1680.0	1600	1680	80.0 AA STEP	80	5	0	0	4	8	2	-0.0375	1	2	5	GTWDHGASDVSLYR ITEVTSEGFR	GTWDHGASDVSLYR ITEVTSEGFR GTWDHGASDVSLYR ITEVTSEGFR ITEVTSEGFR	10	0	0	6	4	2
COL12A1	Collagen alpha-1(XII) chain	COCA1_HUMAN	80Step_Domain_p1680.0_to_1760.0	1680	1760	80.0 AA STEP	80	3	0	0	4	8	0	-0.0375	1	1	4	GTWDHGASDVSLYR	GTWDHGASDVSLYR ITWAPFGSSDK GTWDHGASDVSLYR ITWAPFGSSDK	6	0	0	6	4	0
COL12A1	Collagen alpha-1(XII) chain	COCA1_HUMAN	80Step_Domain_p1760.0_to_1840.0	1760	1840	80.0 AA STEP	80	4	0	13	7	8	2	0	1	6	6	ITYQPSTGEGNEQTTTIGGR LKPDTPYTITVSSLYPDGEGGR ITYQPSTGEGNEQTTTIGGR	ITYQPSTGEGNEQTTTIGGR LKPDTPYTITVSSLYPDGEGGR LKPDTPYTITVSSLYPDGEGGR ITYQPSTGEGNEQTTTIGGR	8	0	2	10	4	2
COL12A1	Collagen alpha-1(XII) chain	COCA1_HUMAN	80Step_Domain_p1840.0_to_1920.0	1840	1920	80.0 AA STEP	80	4	0	0	3	0	4	-0.0125	1	1	2	NLQPDTSYTVTVVPVYTEGDGGR VYDPSTSTLNVR	NLQPDTSYTVTVVPVYTEGDGGR NLQPDTSYTVTVVPVYTEGDGGR	8	0	0	4	0	4
COL12A1	Collagen alpha-1(XII) chain	COCA1_HUMAN	80Step_Domain_p1920.0_to_2000.0	1920	2000	80.0 AA STEP	80	5	0	0	3	0	6	-0.0125	1	2	3	NLQPDTSYTVTVVPVYTEGDGGR VVYSPVDGTRPSESIVVPGNTR WDPAPGPVLQYR	NLQPDTSYTVTVVPVYTEGDGGR NLQPDTSYTVTVVPVYTEGDGGR NVQVYNPTPNSLDVR	10	0	0	4	0	6
COL12A1	Collagen alpha-1(XII) chain	COCA1_HUMAN	80Step_Domain_p2000.0_to_2080.0	2000	2080	80.0 AA STEP	80	4	0	13	1	8	2	0.025	1	6	4	IIYSPTVGDPIDEYTTVPGR NNVILQPLQPDTPYK IIYSPTVGDPIDEYTTVPGR	IIYSPTVGDPIDEYTTVPGR VFGETTNSLSVAWDHADGPVQQYR IIYSPTVGDPIDEYTTVPGR	8	0	2	2	4	2
COL12A1	Collagen alpha-1(XII) chain	COCA1_HUMAN	80Step_Domain_p2080.0_to_2160.0	2080	2160	80.0 AA STEP	80	6	13	0	6	0	0	0.05	1	6	2	ITVIAVYEDGDGGHLTGNGR NNVILQPLQPDTPYK VSWDPSPSPVLGYK VSWDPSPSPVLGYK	VSWDPSPSPVLGYK	12	2	0	8	0	0
COL12A1	Collagen alpha-1(XII) chain	COCA1_HUMAN	80Step_Domain_p2160.0_to_2240.0	2160	2240	80.0 AA STEP	80	0	0	0	0	0	0	0	1	0	0			0	0	0	0	0	0
COL12A1	Collagen alpha-1(XII) chain	COCA1_HUMAN	80Step_Domain_p2240.0_to_2320.0	2240	2320	80.0 AA STEP	80	0	0	0	0	0	0	0	1	0	0			0	0	0	0	0	0
COL12A1	Collagen alpha-1(XII) chain	COCA1_HUMAN	80Step_Domain_p2320.0_to_2400.0	2320	2400	80.0 AA STEP	80	0	0	0	0	0	0	0	1	0	0			0	0	0	0	0	0
COL12A1	Collagen alpha-1(XII) chain	COCA1_HUMAN	80Step_Domain_p2400.0_to_2480.0	2400	2480	80.0 AA STEP	80	6	0	0	4	0	2	0	1	2	2	HVFIVDDFESFEK VLVVVTDGR	HVFIVDDFESFEK VLTWESGMR VLVVVTDGR VLVVVTDGR	12	0	0	6	0	2
COL12A1	Collagen alpha-1(XII) chain	COCA1_HUMAN	80Step_Domain_p2480.0_to_2560.0	2480	2560	80.0 AA STEP	80	6	0	0	4	0	0	0.0125	1	2	1	HVFIVDDFESFEK NFASVQGVSLESGSFPSYSAYR	HVFIVDDFESFEK NFASVQGVSLESGSFPSYSAYR	12	0	0	6	0	0
COL12A1	Collagen alpha-1(XII) chain	COCA1_HUMAN	80Step_Domain_p2560.0_to_2640.0	2560	2640	80.0 AA STEP	80	3	26	13	4	8	6	0.1	0.3861	14	6	GEVQTVTFDTEEVK LLPETPSDPFAIWQITDR GEVQTVTFDTEEVK LLPETPSDPFAIWQITDR LLPETPSDPFAIWQITDR	GEVQTVTFDTEEVK LLPETPSDPFAIWQITDR LLPETPSDPFAIWQITDR GEVQTVTFDTEEVK LLPETPSDPFAIWQITDR	6	4	2	6	4	6
COL12A1	Collagen alpha-1(XII) chain	COCA1_HUMAN	80Step_Domain_p2640.0_to_2720.0	2640	2720	80.0 AA STEP	80	1	13	0	3	0	2	0.0375	1	5	2	GEVQTVTFDTEEVK GEVQTVTFDTEEVK	GEVQTVTFDTEEVK GEVQTVTFDTEEVK	2	2	0	4	0	2
COL12A1	Collagen alpha-1(XII) chain	COCA1_HUMAN	80Step_Domain_p2720.0_to_2800.0	2720	2800	80.0 AA STEP	80	0	0	0	0	0	0	0	1	0	0			0	0	0	0	0	0
COL12A1	Collagen alpha-1(XII) chain	COCA1_HUMAN	80Step_Domain_p2800.0_to_2880.0	2800	2880	80.0 AA STEP	80	0	0	0	0	0	0	0	1	0	0			0	0	0	0	0	0
COL12A1	Collagen alpha-1(XII) chain	COCA1_HUMAN	80Step_Domain_p2880.0_to_2960.0	2880	2960	80.0 AA STEP	80	0	0	0	0	0	0	0	1	0	0			0	0	0	0	0	0
COL12A1	Collagen alpha-1(XII) chain	COCA1_HUMAN	80Step_Domain_p2960.0_to_3040.0	2960	3040	80.0 AA STEP	80	0	0	0	0	0	0	0	1	0	0			0	0	0	0	0	0
COL12A1	Collagen alpha-1(XII) chain	COCA1_HUMAN	80Step_Domain_p3040.0_to_3063.0	3040	3063	80.0 AA STEP	23	0	0	0	0	0	0	0	1	0	0			0	0	0	0	0	0
COL12A1	Collagen alpha-1(XII) chain	COCA1_HUMAN	100Step_Domain_p0_to_100	0	100	100.0 AA STEP	100	0	0	26	0	0	4	0.08	0.9827	9	1	ITVDPTTDGPTK	ITVDPTTDGPTK	0	0	4	0	0	4
COL12A1	Collagen alpha-1(XII) chain	COCA1_HUMAN	100Step_Domain_p100.0_to_200.0	100	200	100.0 AA STEP	100	1	0	0	4	0	4	-0.03	1	0	3	TEFNLNQYYQR	TEFNLNQYYQR VGVVQYSSDTR TEFNLNQYYQR VGVVQYSSDTR	2	0	0	6	0	4
COL12A1	Collagen alpha-1(XII) chain	COCA1_HUMAN	100Step_Domain_p200.0_to_300.0	200	300	100.0 AA STEP	100	5	13	13	8	8	6	0.03	1	10	7	GGNTMTGDAIDYLVK NVGVEVFSLGIK SQDEVEIPAR SQDEVEIPAR VAIIITDGK	DELLAAIK GGNTMTGDAIDYLVK SQDEVEIPAR VAIIITDGK DELLAAIK SQDEVEIPAR DELLAAIK GGNTMTGDAIDYLVK SQDEVEIPAR	10	2	2	12	4	6
COL12A1	Collagen alpha-1(XII) chain	COCA1_HUMAN	100Step_Domain_p300.0_to_400.0	300	400	100.0 AA STEP	100	0	0	0	0	4	0	-0.01	1	0	1		QHALSVGPQTTTLSVR	0	0	0	0	2	0
COL12A1	Collagen alpha-1(XII) chain	COCA1_HUMAN	100Step_Domain_p400.0_to_500.0	400	500	100.0 AA STEP	100	9	0	0	6	0	11	-0.03	1	3	6	DPHTEFTLK GMTSSEPISIMEK VEDIIEAINTFPYR	DPHTEFTLK GMTSSEPISIMEK VEDIIEAINTFPYR DPHTEFTLK VEDIIEAINTFPYR	16	0	0	8	0	10
COL12A1	Collagen alpha-1(XII) chain	COCA1_HUMAN	100Step_Domain_p500.0_to_600.0	500	600	100.0 AA STEP	100	10	0	0	3	4	9	-0.02	1	3	5	NSDVEIFAVGVK SELEAIASPPAETHVFTVEDFDAFQR VEDIIEAINTFPYR	SELEAIASPPAETHVFTVEDFDAFQR VEDIIEAINTFPYR SELEAIASPPAETHVFTVEDFDAFQR NSDVEIFAVGVK VEDIIEAINTFPYR	18	0	0	4	2	8
COL12A1	Collagen alpha-1(XII) chain	COCA1_HUMAN	100Step_Domain_p600.0_to_700.0	600	700	100.0 AA STEP	100	4	0	0	4	8	4	-0.04	1	1	5	DLSFSEVTSYGFK SELEAIASPPAETHVFTVEDFDAFQR	DLSFSEVTSYGFK IEQELAAIK SELEAIASPPAETHVFTVEDFDAFQR DLSFSEVTSYGFK SELEAIASPPAETHVFTVEDFDAFQR DLSFSEVTSYGFK IEQELAAIK	8	0	0	6	4	4
COL12A1	Collagen alpha-1(XII) chain	COCA1_HUMAN	100Step_Domain_p700.0_to_800.0	700	800	100.0 AA STEP	100	5	0	0	7	8	0	-0.03	1	2	5	TLENLIPDTK YEVSVIPEYFSGPGTPLTGNAATEEVR	YEVSVIPEYFSGPGTPLTGNAATEEVR ITWTQAPGR	10	0	0	10	4	0
COL12A1	Collagen alpha-1(XII) chain	COCA1_HUMAN	100Step_Domain_p800.0_to_900.0	800	900	100.0 AA STEP	100	6	0	0	10	0	9	-0.04	1	2	6	QYLVTYTPVAGGETQEVTVR YEVSVIPEYFSGPGTPLTGNAATEEVR	LSWSGAPGK QYLVTYTPVAGGETQEVTVR YEVSVIPEYFSGPGTPLTGNAATEEVR GDTTNTVLQGLK QYLVTYTPVAGGETQEVTVR	12	0	0	14	0	8
COL12A1	Collagen alpha-1(XII) chain	COCA1_HUMAN	100Step_Domain_p900.0_to_1000.0	900	1000	100.0 AA STEP	100	8	13	0	7	13	6	-0.02	1	7	9	DITDTSIGAYWTSAPGMVR ISVFATYSSGEGEPLTGDATTELSQDSK SLYDDVDTGEK	DITDTSIGAYWTSAPGMVR ISVFATYSSGEGEPLTGDATTELSQDSK SLYDDVDTGEK DITDTSIGAYWTSAPGMVR SLYDDVDTGEK GSPQDLVTK ISVFATYSSGEGEPLTGDATTELSQDSK	14	2	0	10	6	6
COL12A1	Collagen alpha-1(XII) chain	COCA1_HUMAN	100Step_Domain_p1000.0_to_1100.0	1000	1100	100.0 AA STEP	100	2	0	0	1	0	6	-0.01	1	1	2	LQPQTTYDITVLPIYK	TSDPTMSSFR LQPQTTYDITVLPIYK TSDPTMSSFR VDEETENTMR	4	0	0	2	0	6
COL12A1	Collagen alpha-1(XII) chain	COCA1_HUMAN	100Step_Domain_p1100.0_to_1200.0	1100	1200	100.0 AA STEP	100	3	0	0	4	0	4	-0.02	1	1	3	LGELVVGPYDNTVVLEELR VTWEPAPGEVK	LGELVVGPYDNTVVLEELR TSDPTMSSFR LGELVVGPYDNTVVLEELR TSDPTMSSFR	6	0	0	6	0	4
COL12A1	Collagen alpha-1(XII) chain	COCA1_HUMAN	100Step_Domain_p1200.0_to_1300.0	1200	1300	100.0 AA STEP	100	4	13	13	3	4	6	0.06	1	10	4	IVEVFDIGPK SLLQAVANLPYK VQIALAQYSGDPR VQIALAQYSGDPR VQIALAQYSGDPR	SLLQAVANLPYK VQIALAQYSGDPR IVEVFDIGPK IVEVFDIGPK VQIALAQYSGDPR	8	2	2	4	2	6
COL12A1	Collagen alpha-1(XII) chain	COCA1_HUMAN	100Step_Domain_p1300.0_to_1400.0	1300	1400	100.0 AA STEP	100	8	13	0	10	8	9	-0.02	1	7	9	DEGVELFAIGIK IGVLITDGK IVDDLTINLCNSVK MIATDPDDTHAYNVADFESLSR MIATDPDDTHAYNVADFESLSR	DEGVELFAIGIK GPGDLEAPSNLVISER MIATDPDDTHAYNVADFESLSR DEGVELFAIGIK MIATDPDDTHAYNVADFESLSR DEGVELFAIGIK GPGDLEAPSNLVISER IGVLITDGK MIATDPDDTHAYNVADFESLSR	14	2	0	14	4	8
COL12A1	Collagen alpha-1(XII) chain	COCA1_HUMAN	100Step_Domain_p1400.0_to_1500.0	1400	1500	100.0 AA STEP	100	2	0	0	0	0	0	0.01	1	1	0	DLKPETEYVVNVYSVVEDEYSEPLKGTEK VEYYPVSGGK		4	0	0	0	0	0
COL12A1	Collagen alpha-1(XII) chain	COCA1_HUMAN	100Step_Domain_p1500.0_to_1600.0	1500	1600	100.0 AA STEP	100	0	0	0	0	0	0	0	1	0	0			0	0	0	0	0	0
COL12A1	Collagen alpha-1(XII) chain	COCA1_HUMAN	100Step_Domain_p1600.0_to_1700.0	1600	1700	100.0 AA STEP	100	5	0	0	7	13	2	-0.05	1	2	7	GTWDHGASDVSLYR ITEVTSEGFR	GTWDHGASDVSLYR ITEVTSEGFR ITWAPFGSSDK GTWDHGASDVSLYR ITEVTSEGFR ITWAPFGSSDK ITEVTSEGFR	10	0	0	10	6	2
COL12A1	Collagen alpha-1(XII) chain	COCA1_HUMAN	100Step_Domain_p1700.0_to_1800.0	1700	1800	100.0 AA STEP	100	1	0	13	1	0	2	0.04	1	5	1	ITYQPSTGEGNEQTTTIGGR ITYQPSTGEGNEQTTTIGGR	ITYQPSTGEGNEQTTTIGGR ITYQPSTGEGNEQTTTIGGR	2	0	2	2	0	2
COL12A1	Collagen alpha-1(XII) chain	COCA1_HUMAN	100Step_Domain_p1800.0_to_1900.0	1800	1900	100.0 AA STEP	100	5	0	13	7	8	2	0	1	6	6	ITYQPSTGEGNEQTTTIGGR LKPDTPYTITVSSLYPDGEGGR VYDPSTSTLNVR ITYQPSTGEGNEQTTTIGGR	ITYQPSTGEGNEQTTTIGGR LKPDTPYTITVSSLYPDGEGGR LKPDTPYTITVSSLYPDGEGGR ITYQPSTGEGNEQTTTIGGR	10	0	2	10	4	2
COL12A1	Collagen alpha-1(XII) chain	COCA1_HUMAN	100Step_Domain_p1900.0_to_2000.0	1900	2000	100.0 AA STEP	100	5	0	0	3	0	6	-0.01	1	2	3	NLQPDTSYTVTVVPVYTEGDGGR VVYSPVDGTRPSESIVVPGNTR WDPAPGPVLQYR	NLQPDTSYTVTVVPVYTEGDGGR NLQPDTSYTVTVVPVYTEGDGGR NVQVYNPTPNSLDVR	10	0	0	4	0	6
COL12A1	Collagen alpha-1(XII) chain	COCA1_HUMAN	100Step_Domain_p2000.0_to_2100.0	2000	2100	100.0 AA STEP	100	5	0	13	1	8	2	0.02	1	6	4	IIYSPTVGDPIDEYTTVPGR ITVIAVYEDGDGGHLTGNGR NNVILQPLQPDTPYK IIYSPTVGDPIDEYTTVPGR	IIYSPTVGDPIDEYTTVPGR VFGETTNSLSVAWDHADGPVQQYR IIYSPTVGDPIDEYTTVPGR	10	0	2	2	4	2
COL12A1	Collagen alpha-1(XII) chain	COCA1_HUMAN	100Step_Domain_p2100.0_to_2200.0	2100	2200	100.0 AA STEP	100	4	13	0	6	0	0	0.04	1	6	2	ITVIAVYEDGDGGHLTGNGR VSWDPSPSPVLGYK VSWDPSPSPVLGYK	VSWDPSPSPVLGYK	8	2	0	8	0	0
COL12A1	Collagen alpha-1(XII) chain	COCA1_HUMAN	100Step_Domain_p2200.0_to_2300.0	2200	2300	100.0 AA STEP	100	0	0	0	0	0	0	0	1	0	0			0	0	0	0	0	0
COL12A1	Collagen alpha-1(XII) chain	COCA1_HUMAN	100Step_Domain_p2300.0_to_2400.0	2300	2400	100.0 AA STEP	100	0	0	0	0	0	0	0	1	0	0			0	0	0	0	0	0
COL12A1	Collagen alpha-1(XII) chain	COCA1_HUMAN	100Step_Domain_p2400.0_to_2500.0	2400	2500	100.0 AA STEP	100	6	0	0	4	0	2	0	1	2	2	HVFIVDDFESFEK VLVVVTDGR	HVFIVDDFESFEK VLTWESGMR VLVVVTDGR VLVVVTDGR	12	0	0	6	0	2
COL12A1	Collagen alpha-1(XII) chain	COCA1_HUMAN	100Step_Domain_p2500.0_to_2600.0	2500	2600	100.0 AA STEP	100	4	13	13	4	8	4	0.05	1	10	5	LLPETPSDPFAIWQITDR NFASVQGVSLESGSFPSYSAYR LLPETPSDPFAIWQITDR LLPETPSDPFAIWQITDR	LLPETPSDPFAIWQITDR NFASVQGVSLESGSFPSYSAYR LLPETPSDPFAIWQITDR LLPETPSDPFAIWQITDR	8	2	2	6	4	4
COL12A1	Collagen alpha-1(XII) chain	COCA1_HUMAN	100Step_Domain_p2600.0_to_2700.0	2600	2700	100.0 AA STEP	100	3	26	13	4	8	6	0.08	0.5983	14	6	GEVQTVTFDTEEVK LLPETPSDPFAIWQITDR GEVQTVTFDTEEVK LLPETPSDPFAIWQITDR LLPETPSDPFAIWQITDR	GEVQTVTFDTEEVK LLPETPSDPFAIWQITDR LLPETPSDPFAIWQITDR GEVQTVTFDTEEVK LLPETPSDPFAIWQITDR	6	4	2	6	4	6
COL12A1	Collagen alpha-1(XII) chain	COCA1_HUMAN	100Step_Domain_p2700.0_to_2800.0	2700	2800	100.0 AA STEP	100	0	0	0	0	0	0	0	1	0	0			0	0	0	0	0	0
COL12A1	Collagen alpha-1(XII) chain	COCA1_HUMAN	100Step_Domain_p2800.0_to_2900.0	2800	2900	100.0 AA STEP	100	0	0	0	0	0	0	0	1	0	0			0	0	0	0	0	0
COL12A1	Collagen alpha-1(XII) chain	COCA1_HUMAN	100Step_Domain_p2900.0_to_3000.0	2900	3000	100.0 AA STEP	100	0	0	0	0	0	0	0	1	0	0			0	0	0	0	0	0
COL12A1	Collagen alpha-1(XII) chain	COCA1_HUMAN	100Step_Domain_p3000.0_to_3063.0	3000	3063	100.0 AA STEP	63	0	0	0	0	0	0	0	1	0	0			0	0	0	0	0	0
DPT	Dermatopontin	DERM_HUMAN	2 X 53-55 AA tandem repeats	26	186	REGIONS	160	57	57	57	57	57	57	0	1	57	57	AGMEWYQTCSNNGLVAGFQSR GATTTFSAVER QGFSYQCPQGQVIVAVR YFESVLDR AGMEWYQTCSNNGLVAGFQSR GATTTFSAVER QGFSYQCPQGQVIVAVR YFESVLDR AGMEWYQTCSNNGLVAGFQSR GATTTFSAVER QGFSYQCPQGQVIVAVR YFESVLDR	AGMEWYQTCSNNGLVAGFQSR GATTTFSAVER QGFSYQCPQGQVIVAVR YFESVLDR AGMEWYQTCSNNGLVAGFQSR GATTTFSAVER QGFSYQCPQGQVIVAVR YFESVLDR AGMEWYQTCSNNGLVAGFQSR GATTTFSAVER YFESVLDR	32	54	38	82	58	34
DPT	Dermatopontin	DERM_HUMAN	2021-01-01	26	79	REPEAT	53	7	2	3	1	4	0	0.0377358	0.4575	4	2	QGFSYQCPQGQVIVAVR QGFSYQCPQGQVIVAVR QGFSYQCPQGQVIVAVR	QGFSYQCPQGQVIVAVR QGFSYQCPQGQVIVAVR	4	2	2	2	4	0
DPT	Dermatopontin	DERM_HUMAN	2021-02-01	80	135	REPEAT	55	43	46	42	51	47	47	-0.0727273	0.03	44	48	AGMEWYQTCSNNGLVAGFQSR YFESVLDR AGMEWYQTCSNNGLVAGFQSR YFESVLDR AGMEWYQTCSNNGLVAGFQSR YFESVLDR	AGMEWYQTCSNNGLVAGFQSR YFESVLDR AGMEWYQTCSNNGLVAGFQSR YFESVLDR AGMEWYQTCSNNGLVAGFQSR YFESVLDR	24	44	28	74	48	28
DPT	Dermatopontin	DERM_HUMAN	2021-03-03	181	186	REPEAT	5	0	0	0	0	0	0	0	1	0	0			0	0	0	0	0	0
DPT	Dermatopontin	DERM_HUMAN	50Step_Domain_p0_to_50	0	50	50.0 AA STEP	50	7	2	3	1	4	0	0.04	1	4	2	QGFSYQCPQGQVIVAVR QGFSYQCPQGQVIVAVR QGFSYQCPQGQVIVAVR	QGFSYQCPQGQVIVAVR QGFSYQCPQGQVIVAVR	4	2	2	2	4	0
DPT	Dermatopontin	DERM_HUMAN	50Step_Domain_p50.0_to_100.0	50	100	50.0 AA STEP	50	39	42	39	44	43	30	0.02	1	40	39	AGMEWYQTCSNNGLVAGFQSR QGFSYQCPQGQVIVAVR AGMEWYQTCSNNGLVAGFQSR QGFSYQCPQGQVIVAVR AGMEWYQTCSNNGLVAGFQSR QGFSYQCPQGQVIVAVR	AGMEWYQTCSNNGLVAGFQSR QGFSYQCPQGQVIVAVR AGMEWYQTCSNNGLVAGFQSR QGFSYQCPQGQVIVAVR AGMEWYQTCSNNGLVAGFQSR	22	40	26	64	44	18
DPT	Dermatopontin	DERM_HUMAN	50Step_Domain_p100.0_to_150.0	100	150	50.0 AA STEP	50	43	46	42	51	47	47	-0.08	0.4385	44	48	AGMEWYQTCSNNGLVAGFQSR YFESVLDR AGMEWYQTCSNNGLVAGFQSR YFESVLDR AGMEWYQTCSNNGLVAGFQSR YFESVLDR	AGMEWYQTCSNNGLVAGFQSR YFESVLDR AGMEWYQTCSNNGLVAGFQSR YFESVLDR AGMEWYQTCSNNGLVAGFQSR YFESVLDR	24	44	28	74	48	28
DPT	Dermatopontin	DERM_HUMAN	50Step_Domain_p150.0_to_200.0	150	200	50.0 AA STEP	50	7	8	12	4	6	10	0.04	1	9	7	GATTTFSAVER GATTTFSAVER GATTTFSAVER	GATTTFSAVER GATTTFSAVER GATTTFSAVER	4	8	8	6	6	6
DPT	Dermatopontin	DERM_HUMAN	50Step_Domain_p200.0_to_201.0	200	201	50.0 AA STEP	1	0	0	0	0	0	0	0	1	0	0			0	0	0	0	0	0
DPT	Dermatopontin	DERM_HUMAN	80Step_Domain_p0_to_80	0	80	80.0 AA STEP	80	7	2	3	1	4	0	0.025	0.8229	4	2	QGFSYQCPQGQVIVAVR QGFSYQCPQGQVIVAVR QGFSYQCPQGQVIVAVR	QGFSYQCPQGQVIVAVR QGFSYQCPQGQVIVAVR	4	2	2	2	4	0
DPT	Dermatopontin	DERM_HUMAN	80Step_Domain_p80.0_to_160.0	80	160	80.0 AA STEP	80	43	46	42	51	47	47	-0.05	0.1224	44	48	AGMEWYQTCSNNGLVAGFQSR YFESVLDR AGMEWYQTCSNNGLVAGFQSR YFESVLDR AGMEWYQTCSNNGLVAGFQSR YFESVLDR	AGMEWYQTCSNNGLVAGFQSR YFESVLDR AGMEWYQTCSNNGLVAGFQSR YFESVLDR AGMEWYQTCSNNGLVAGFQSR YFESVLDR	24	44	28	74	48	28
DPT	Dermatopontin	DERM_HUMAN	80Step_Domain_p160.0_to_201.0	160	201	80.0 AA STEP	41	7	8	12	4	6	10	0.0487805	0.8229	9	7	GATTTFSAVER GATTTFSAVER GATTTFSAVER	GATTTFSAVER GATTTFSAVER GATTTFSAVER	4	8	8	6	6	6
DPT	Dermatopontin	DERM_HUMAN	100Step_Domain_p0_to_100	0	100	100.0 AA STEP	100	39	42	39	44	43	30	0.01	1	40	39	AGMEWYQTCSNNGLVAGFQSR QGFSYQCPQGQVIVAVR AGMEWYQTCSNNGLVAGFQSR QGFSYQCPQGQVIVAVR AGMEWYQTCSNNGLVAGFQSR QGFSYQCPQGQVIVAVR	AGMEWYQTCSNNGLVAGFQSR QGFSYQCPQGQVIVAVR AGMEWYQTCSNNGLVAGFQSR QGFSYQCPQGQVIVAVR AGMEWYQTCSNNGLVAGFQSR	22	40	26	64	44	18
DPT	Dermatopontin	DERM_HUMAN	100Step_Domain_p100.0_to_200.0	100	200	100.0 AA STEP	100	50	55	54	56	53	57	-0.02	1	53	55	AGMEWYQTCSNNGLVAGFQSR GATTTFSAVER YFESVLDR AGMEWYQTCSNNGLVAGFQSR GATTTFSAVER YFESVLDR AGMEWYQTCSNNGLVAGFQSR GATTTFSAVER YFESVLDR	AGMEWYQTCSNNGLVAGFQSR GATTTFSAVER YFESVLDR AGMEWYQTCSNNGLVAGFQSR GATTTFSAVER YFESVLDR AGMEWYQTCSNNGLVAGFQSR GATTTFSAVER YFESVLDR	28	52	36	80	54	34
DPT	Dermatopontin	DERM_HUMAN	100Step_Domain_p200.0_to_201.0	200	201	100.0 AA STEP	1	0	0	0	0	0	0	0	1	0	0			0	0	0	0	0	0
HEL-S-17	2-phospho-D-glycerate hydro-lyase	A0A024R4F1_HUMAN	Enolase_N	3	134	DOMAINS	131	31	34	28	43	44	39	-0.0839695	0.0028	31	42	AAVPSGASTGIYEALELR GNPTVEVDLFTSK LMIEMDGTENK TIAPALVSK AAVPSGASTGIYEALELR GNPTVEVDLFTSK LMIEMDGTENK TIAPALVSK AAVPSGASTGIYEALELR GNPTVEVDLFTSK LMIEMDGTENK TIAPALVSK	AAVPSGASTGIYEALELR GNPTVEVDLFTSK LMIEMDGTENK TIAPALVSK AAVPSGASTGIYEALELR GNPTVEVDLFTSK LMIEMDGTENK TIAPALVSK AAVPSGASTGIYEALELR GNPTVEVDLFTSK LMIEMDGTENK LNVTEQEK TIAPALVSK	36	28	30	48	46	36
HEL-S-17	2-phospho-D-glycerate hydro-lyase	A0A024R4F1_HUMAN	Enolase_C	142	431	DOMAINS	289	72	69	75	60	59	64	0.0380623	0.0028	72	61	DATNVGDEGGFAPNILENK DYPVVSIEDPFDQDDWGAWQK FTASAGIQVVGDDLTVTNPK IGAEVYHNLK LAMQEFMILPVGAANFR VVIGMDVAASEFFR YISPDQLADLYK DATNVGDEGGFAPNILENK DYPVVSIEDPFDQDDWGAWQK FTASAGIQVVGDDLTVTNPK IGAEVYHNLK LAMQEFMILPVGAANFR VVIGMDVAASEFFR YISPDQLADLYK DATNVGDEGGFAPNILENK DYPVVSIEDPFDQDDWGAWQK FTASAGIQVVGDDLTVTNPK IGAEVYHNLK LAMQEFMILPVGAANFR VVIGMDVAASEFFR YISPDQLADLYK	DATNVGDEGGFAPNILENK DYPVVSIEDPFDQDDWGAWQK FTASAGIQVVGDDLTVTNPK IGAEVYHNLK LAMQEFMILPVGAANFR VVIGMDVAASEFFR YISPDQLADLYK DATNVGDEGGFAPNILENK DYPVVSIEDPFDQDDWGAWQK FTASAGIQVVGDDLTVTNPK IGAEVYHNLK LAMQEFMILPVGAANFR VVIGMDVAASEFFR YISPDQLADLYK DATNVGDEGGFAPNILENK DYPVVSIEDPFDQDDWGAWQK FTASAGIQVVGDDLTVTNPK IEEELGSK IGAEVYHNLK LAMQEFMILPVGAANFR VVIGMDVAASEFFR YISPDQLADLYK	84	58	80	68	62	60
HEL-S-17	2-phospho-D-glycerate hydro-lyase	A0A024R4F1_HUMAN	50Step_Domain_p0_to_50	0	50	50.0 AA STEP	50	19	14	15	32	38	19	-0.28	0.0045	16	30	AAVPSGASTGIYEALELR GNPTVEVDLFTSK AAVPSGASTGIYEALELR GNPTVEVDLFTSK AAVPSGASTGIYEALELR GNPTVEVDLFTSK	AAVPSGASTGIYEALELR GNPTVEVDLFTSK AAVPSGASTGIYEALELR GNPTVEVDLFTSK AAVPSGASTGIYEALELR GNPTVEVDLFTSK	22	12	16	36	40	18
HEL-S-17	2-phospho-D-glycerate hydro-lyase	A0A024R4F1_HUMAN	50Step_Domain_p50.0_to_100.0	50	100	50.0 AA STEP	50	12	19	13	11	6	19	0.06	1	15	12	LMIEMDGTENK TIAPALVSK LMIEMDGTENK TIAPALVSK LMIEMDGTENK TIAPALVSK	LMIEMDGTENK TIAPALVSK LMIEMDGTENK TIAPALVSK LMIEMDGTENK LNVTEQEK TIAPALVSK	14	16	14	12	6	18
HEL-S-17	2-phospho-D-glycerate hydro-lyase	A0A024R4F1_HUMAN	50Step_Domain_p100.0_to_150.0	100	150	50.0 AA STEP	50	10	12	6	9	4	6	0.06	1	9	6	LMIEMDGTENK LMIEMDGTENK LMIEMDGTENK	LMIEMDGTENK LMIEMDGTENK LMIEMDGTENK	12	10	6	10	4	6
HEL-S-17	2-phospho-D-glycerate hydro-lyase	A0A024R4F1_HUMAN	50Step_Domain_p150.0_to_200.0	150	200	50.0 AA STEP	50	19	10	17	16	10	17	0.02	1	15	14	IGAEVYHNLK LAMQEFMILPVGAANFR IGAEVYHNLK LAMQEFMILPVGAANFR IGAEVYHNLK LAMQEFMILPVGAANFR	IGAEVYHNLK LAMQEFMILPVGAANFR IGAEVYHNLK LAMQEFMILPVGAANFR IGAEVYHNLK LAMQEFMILPVGAANFR	22	8	18	18	10	16
HEL-S-17	2-phospho-D-glycerate hydro-lyase	A0A024R4F1_HUMAN	50Step_Domain_p200.0_to_250.0	200	250	50.0 AA STEP	50	24	29	15	12	13	17	0.18	0.1755	23	14	DATNVGDEGGFAPNILENK VVIGMDVAASEFFR DATNVGDEGGFAPNILENK VVIGMDVAASEFFR DATNVGDEGGFAPNILENK VVIGMDVAASEFFR	DATNVGDEGGFAPNILENK VVIGMDVAASEFFR DATNVGDEGGFAPNILENK VVIGMDVAASEFFR DATNVGDEGGFAPNILENK VVIGMDVAASEFFR	28	24	16	14	14	16
HEL-S-17	2-phospho-D-glycerate hydro-lyase	A0A024R4F1_HUMAN	50Step_Domain_p250.0_to_300.0	250	300	50.0 AA STEP	50	36	43	34	28	32	30	0.16	0.3357	38	30	DYPVVSIEDPFDQDDWGAWQK VVIGMDVAASEFFR YISPDQLADLYK DYPVVSIEDPFDQDDWGAWQK VVIGMDVAASEFFR YISPDQLADLYK DYPVVSIEDPFDQDDWGAWQK VVIGMDVAASEFFR YISPDQLADLYK	DYPVVSIEDPFDQDDWGAWQK VVIGMDVAASEFFR YISPDQLADLYK DYPVVSIEDPFDQDDWGAWQK VVIGMDVAASEFFR YISPDQLADLYK DYPVVSIEDPFDQDDWGAWQK VVIGMDVAASEFFR YISPDQLADLYK	42	36	36	32	34	28
HEL-S-17	2-phospho-D-glycerate hydro-lyase	A0A024R4F1_HUMAN	50Step_Domain_p300.0_to_350.0	300	350	50.0 AA STEP	50	19	19	28	20	23	15	0.06	1	22	19	DYPVVSIEDPFDQDDWGAWQK FTASAGIQVVGDDLTVTNPK DYPVVSIEDPFDQDDWGAWQK FTASAGIQVVGDDLTVTNPK DYPVVSIEDPFDQDDWGAWQK FTASAGIQVVGDDLTVTNPK	DYPVVSIEDPFDQDDWGAWQK FTASAGIQVVGDDLTVTNPK DYPVVSIEDPFDQDDWGAWQK FTASAGIQVVGDDLTVTNPK DYPVVSIEDPFDQDDWGAWQK FTASAGIQVVGDDLTVTNPK	22	16	30	22	24	14
HEL-S-17	2-phospho-D-glycerate hydro-lyase	A0A024R4F1_HUMAN	50Step_Domain_p350.0_to_400.0	350	400	50.0 AA STEP	50	0	0	0	0	0	0	0	1	0	0			0	0	0	0	0	0
HEL-S-17	2-phospho-D-glycerate hydro-lyase	A0A024R4F1_HUMAN	50Step_Domain_p400.0_to_434.0	400	434	50.0 AA STEP	34	0	0	0	0	0	2	-0.0294118	1	0	1		IEEELGSK	0	0	0	0	0	2
HEL-S-17	2-phospho-D-glycerate hydro-lyase	A0A024R4F1_HUMAN	80Step_Domain_p0_to_80	0	80	80.0 AA STEP	80	21	22	22	34	40	30	-0.1625	0.0042	22	35	AAVPSGASTGIYEALELR GNPTVEVDLFTSK TIAPALVSK AAVPSGASTGIYEALELR GNPTVEVDLFTSK TIAPALVSK AAVPSGASTGIYEALELR GNPTVEVDLFTSK TIAPALVSK	AAVPSGASTGIYEALELR GNPTVEVDLFTSK TIAPALVSK AAVPSGASTGIYEALELR GNPTVEVDLFTSK TIAPALVSK AAVPSGASTGIYEALELR GNPTVEVDLFTSK TIAPALVSK	24	18	24	38	42	28
HEL-S-17	2-phospho-D-glycerate hydro-lyase	A0A024R4F1_HUMAN	80Step_Domain_p80.0_to_160.0	80	160	80.0 AA STEP	80	10	12	6	9	4	9	0.025	1	9	7	LMIEMDGTENK LMIEMDGTENK LMIEMDGTENK	LMIEMDGTENK LMIEMDGTENK LMIEMDGTENK LNVTEQEK	12	10	6	10	4	8
HEL-S-17	2-phospho-D-glycerate hydro-lyase	A0A024R4F1_HUMAN	80Step_Domain_p160.0_to_240.0	160	240	80.0 AA STEP	80	43	38	32	28	23	34	0.125	0.063	38	28	DATNVGDEGGFAPNILENK IGAEVYHNLK LAMQEFMILPVGAANFR VVIGMDVAASEFFR DATNVGDEGGFAPNILENK IGAEVYHNLK LAMQEFMILPVGAANFR VVIGMDVAASEFFR DATNVGDEGGFAPNILENK IGAEVYHNLK LAMQEFMILPVGAANFR VVIGMDVAASEFFR	DATNVGDEGGFAPNILENK IGAEVYHNLK LAMQEFMILPVGAANFR VVIGMDVAASEFFR DATNVGDEGGFAPNILENK IGAEVYHNLK LAMQEFMILPVGAANFR VVIGMDVAASEFFR DATNVGDEGGFAPNILENK IGAEVYHNLK LAMQEFMILPVGAANFR VVIGMDVAASEFFR	50	32	34	32	24	32
HEL-S-17	2-phospho-D-glycerate hydro-lyase	A0A024R4F1_HUMAN	80Step_Domain_p240.0_to_320.0	240	320	80.0 AA STEP	80	43	48	51	36	44	34	0.1125	0.063	47	38	DYPVVSIEDPFDQDDWGAWQK FTASAGIQVVGDDLTVTNPK VVIGMDVAASEFFR YISPDQLADLYK DYPVVSIEDPFDQDDWGAWQK FTASAGIQVVGDDLTVTNPK VVIGMDVAASEFFR YISPDQLADLYK DYPVVSIEDPFDQDDWGAWQK FTASAGIQVVGDDLTVTNPK VVIGMDVAASEFFR YISPDQLADLYK	DYPVVSIEDPFDQDDWGAWQK FTASAGIQVVGDDLTVTNPK VVIGMDVAASEFFR YISPDQLADLYK DYPVVSIEDPFDQDDWGAWQK FTASAGIQVVGDDLTVTNPK VVIGMDVAASEFFR YISPDQLADLYK DYPVVSIEDPFDQDDWGAWQK FTASAGIQVVGDDLTVTNPK VVIGMDVAASEFFR YISPDQLADLYK	50	40	54	40	46	32
HEL-S-17	2-phospho-D-glycerate hydro-lyase	A0A024R4F1_HUMAN	80Step_Domain_p320.0_to_400.0	320	400	80.0 AA STEP	80	7	5	17	7	11	4	0.0375	1	10	7	FTASAGIQVVGDDLTVTNPK FTASAGIQVVGDDLTVTNPK FTASAGIQVVGDDLTVTNPK	FTASAGIQVVGDDLTVTNPK FTASAGIQVVGDDLTVTNPK FTASAGIQVVGDDLTVTNPK	8	4	18	8	12	4
HEL-S-17	2-phospho-D-glycerate hydro-lyase	A0A024R4F1_HUMAN	80Step_Domain_p400.0_to_434.0	400	434	80.0 AA STEP	34	0	0	0	0	0	2	-0.0294118	1	0	1		IEEELGSK	0	0	0	0	0	2
HEL-S-17	2-phospho-D-glycerate hydro-lyase	A0A024R4F1_HUMAN	100Step_Domain_p0_to_100	0	100	100.0 AA STEP	100	31	34	28	43	44	39	-0.11	0.022	31	42	AAVPSGASTGIYEALELR GNPTVEVDLFTSK LMIEMDGTENK TIAPALVSK AAVPSGASTGIYEALELR GNPTVEVDLFTSK LMIEMDGTENK TIAPALVSK AAVPSGASTGIYEALELR GNPTVEVDLFTSK LMIEMDGTENK TIAPALVSK	AAVPSGASTGIYEALELR GNPTVEVDLFTSK LMIEMDGTENK TIAPALVSK AAVPSGASTGIYEALELR GNPTVEVDLFTSK LMIEMDGTENK TIAPALVSK AAVPSGASTGIYEALELR GNPTVEVDLFTSK LMIEMDGTENK LNVTEQEK TIAPALVSK	36	28	30	48	46	36
HEL-S-17	2-phospho-D-glycerate hydro-lyase	A0A024R4F1_HUMAN	100Step_Domain_p100.0_to_200.0	100	200	100.0 AA STEP	100	29	22	22	25	13	24	0.03	1	24	21	IGAEVYHNLK LAMQEFMILPVGAANFR LMIEMDGTENK IGAEVYHNLK LAMQEFMILPVGAANFR LMIEMDGTENK IGAEVYHNLK LAMQEFMILPVGAANFR LMIEMDGTENK	IGAEVYHNLK LAMQEFMILPVGAANFR LMIEMDGTENK IGAEVYHNLK LAMQEFMILPVGAANFR LMIEMDGTENK IGAEVYHNLK LAMQEFMILPVGAANFR LMIEMDGTENK	34	18	24	28	14	22
HEL-S-17	2-phospho-D-glycerate hydro-lyase	A0A024R4F1_HUMAN	100Step_Domain_p200.0_to_300.0	200	300	100.0 AA STEP	100	46	55	41	37	38	41	0.08	0.0995	47	39	DATNVGDEGGFAPNILENK DYPVVSIEDPFDQDDWGAWQK VVIGMDVAASEFFR YISPDQLADLYK DATNVGDEGGFAPNILENK DYPVVSIEDPFDQDDWGAWQK VVIGMDVAASEFFR YISPDQLADLYK DATNVGDEGGFAPNILENK DYPVVSIEDPFDQDDWGAWQK VVIGMDVAASEFFR YISPDQLADLYK	DATNVGDEGGFAPNILENK DYPVVSIEDPFDQDDWGAWQK VVIGMDVAASEFFR YISPDQLADLYK DATNVGDEGGFAPNILENK DYPVVSIEDPFDQDDWGAWQK VVIGMDVAASEFFR YISPDQLADLYK DATNVGDEGGFAPNILENK DYPVVSIEDPFDQDDWGAWQK VVIGMDVAASEFFR YISPDQLADLYK	54	46	44	42	40	38
HEL-S-17	2-phospho-D-glycerate hydro-lyase	A0A024R4F1_HUMAN	100Step_Domain_p300.0_to_400.0	300	400	100.0 AA STEP	100	19	19	28	20	23	15	0.03	1	22	19	DYPVVSIEDPFDQDDWGAWQK FTASAGIQVVGDDLTVTNPK DYPVVSIEDPFDQDDWGAWQK FTASAGIQVVGDDLTVTNPK DYPVVSIEDPFDQDDWGAWQK FTASAGIQVVGDDLTVTNPK	DYPVVSIEDPFDQDDWGAWQK FTASAGIQVVGDDLTVTNPK DYPVVSIEDPFDQDDWGAWQK FTASAGIQVVGDDLTVTNPK DYPVVSIEDPFDQDDWGAWQK FTASAGIQVVGDDLTVTNPK	22	16	30	22	24	14
HEL-S-17	2-phospho-D-glycerate hydro-lyase	A0A024R4F1_HUMAN	100Step_Domain_p400.0_to_434.0	400	434	100.0 AA STEP	34	0	0	0	0	0	2	-0.0294118	1	0	1		IEEELGSK	0	0	0	0	0	2
ENO1	Alpha-enolase	ENOA_HUMAN	Epitope recognized by CAR antibodies	56	63	REGIONS	7	0	0	0	0	0	0	0	1	0	0			0	0	0	0	0	0
ENO1	Alpha-enolase	ENOA_HUMAN	Required for repression of c-myc promoter activity	97	237	REGIONS	140	39	34	30	34	19	34	0.0357143	0.3144	34	29	DATNVGDEGGFAPNILENK IGAEVYHNLK LAMQEFMILPVGAANFR LMIEMDGTENK DATNVGDEGGFAPNILENK IGAEVYHNLK LAMQEFMILPVGAANFR LMIEMDGTENK DATNVGDEGGFAPNILENK IGAEVYHNLK LAMQEFMILPVGAANFR LMIEMDGTENK	DATNVGDEGGFAPNILENK IGAEVYHNLK LAMQEFMILPVGAANFR LMIEMDGTENK DATNVGDEGGFAPNILENK IGAEVYHNLK LAMQEFMILPVGAANFR LMIEMDGTENK DATNVGDEGGFAPNILENK IGAEVYHNLK LAMQEFMILPVGAANFR LMIEMDGTENK	46	28	32	38	20	32
ENO1	Alpha-enolase	ENOA_HUMAN	Substrate binding	370	373	REGIONS	3	0	0	0	0	0	0	0	1	0	0			0	0	0	0	0	0
ENO1	Alpha-enolase	ENOA_HUMAN	Required for interaction with PLG	405	434	REGIONS	29	0	0	0	0	0	2	-0.0344828	1	0	1		IEEELGSK	0	0	0	0	0	2
ENO1	Alpha-enolase	ENOA_HUMAN	50Step_Domain_p0_to_50	0	50	50.0 AA STEP	50	19	14	15	32	38	19	-0.28	0.0045	16	30	AAVPSGASTGIYEALELR GNPTVEVDLFTSK AAVPSGASTGIYEALELR GNPTVEVDLFTSK AAVPSGASTGIYEALELR GNPTVEVDLFTSK	AAVPSGASTGIYEALELR GNPTVEVDLFTSK AAVPSGASTGIYEALELR GNPTVEVDLFTSK AAVPSGASTGIYEALELR GNPTVEVDLFTSK	22	12	16	36	40	18
ENO1	Alpha-enolase	ENOA_HUMAN	50Step_Domain_p50.0_to_100.0	50	100	50.0 AA STEP	50	12	19	13	11	6	19	0.06	1	15	12	LMIEMDGTENK TIAPALVSK LMIEMDGTENK TIAPALVSK LMIEMDGTENK TIAPALVSK	LMIEMDGTENK TIAPALVSK LMIEMDGTENK TIAPALVSK LMIEMDGTENK LNVTEQEK TIAPALVSK	14	16	14	12	6	18
[truncated: 14,489 more rows]
[truncated: 1 more columns]

## Sheet: PLF of 50 aa protein segments 
Table S5: Full peptide location fingerprinting analysis of left lateral inner AF IVD datasets. Protein primary sequences were computationally divided into 50 aa-sized segments and peptide sequences, and their spectrum counts, were mapped and summed within each segment. Peptide counts per segment were then normalised between aged and young groups based on the median whole protein spectrum count an…
[truncated: 1,330 more rows]

[truncated: 1 more sheets: List of biomarker candidates]
