# Supplementary material for: Peptide Location Fingerprinting Reveals Tissue Region-specific Differences in Protein Structures in an Ageing Human Organ
Source: Preprints.org preprint supplement (doi:10.20944/preprints202107.0670.v1), 2021-07-29
Supplement: Supplementary file 6 [file Table S6_Peptide location fingerprinting of anterior inner AF.xlsx]

## Sheet: PLF of Ant IAF Y vs O
Gene	Protein Name	Uniprot AC	Domain_Name 2	Domain_Start 2	Domain_Finish 2	Domain Type 2	Domain_Length 2	Mudpit_Aged L3 4 Anterior NP IAF Fraction 1 2	Mudpit_Aged L4_5 Anterior NP IAF Fraction 1 2	Mudpit_Aged L5 S1 Anterior NP IAF Fraction 1 2	Mudpit_Young L3 4 Anterior NP IAF Fraction 1 2	Mudpit_Young L4_5 Anterior NP IAF Fraction 1 2	Mudpit_Young L5 S1 Anterior NP IAF Fraction 1 2	Diff Young vs Aged 2	p: Young vs Aged 2	Aged 2	Young 2	Peptides Aged 2	Peptides Young 2	Original_Mudpit_Aged L3 4 Anterior NP IAF Fraction 1 2	Original_Mudpit_Aged L4_5 Anterior NP IAF Fraction 1 2	Original_Mudpit_Aged L5 S1 Anterior NP IAF Fraction 1 2	Original_Mudpit_Young L3 4 Anterior NP IAF Fraction 1 2	Original_Mudpit_Young L4_5 Anterior NP IAF Fraction 1 2	Original_Mudpit_Young L5 S1 Anterior NP IAF Fraction 1 2
GC	Gc-globulin	D6RF35_HUMAN	Albumin	16	208	DOMAINS	192	5	10	0	0	0	0	0.0260417	0.1932	5	0	FPSGTFEQVSQLVK HLSLLTTLSNR EDFTSLSLVLYSR FPSGTFEQVSQLVK HLSLLTTLSNR HQPQEFPTYVEPTNDEICEAFR KFPSGTFEQVSQLVK		10	17	0	0	0	0
GC	Gc-globulin	D6RF35_HUMAN	Albumin_209_394	209	394	DOMAINS	185	21	15	23	0	0	0	0.108108	0.0002	20	0	HLSLLTTLSNR KELSSFIDK THLPEVFLSK VPTADLEDVLPLAEDITNILSK HLSLLTTLSNR KELSSFIDK RTHLPEVFLSK THLPEVFLSK VPTADLEDVLPLAEDITNILSK KELSSFIDK THLPEVFLSK VPTADLEDVLPLAEDITNILSK		42	25	7	0	0	0
GC	Gc-globulin	D6RF35_HUMAN	50Step_Domain_p200.0_to_250.0	200	250	50.0 AA STEP	50	13	8	13	0	0	0	0.22	0	11	0	HLSLLTTLSNR VPTADLEDVLPLAEDITNILSK HLSLLTTLSNR VPTADLEDVLPLAEDITNILSK VPTADLEDVLPLAEDITNILSK		26	13	4	0	0	0
GC	Gc-globulin	D6RF35_HUMAN	50Step_Domain_p250.0_to_300.0	250	300	50.0 AA STEP	50	11	6	13	0	0	0	0.2	0	10	0	VPTADLEDVLPLAEDITNILSK VPTADLEDVLPLAEDITNILSK VPTADLEDVLPLAEDITNILSK		22	10	4	0	0	0
GC	Gc-globulin	D6RF35_HUMAN	50Step_Domain_p350.0_to_400.0	350	400	50.0 AA STEP	50	10	9	13	0	0	0	0.22	0	11	0	ELSSFIDK ELSSFIDKGQELCADYSENTFTEYK KELSSFIDK THLPEVFLSK ELSSFIDK KELSSFIDK RTHLPEVFLSK THLPEVFLSK ELSSFIDK KELSSFIDK THLPEVFLSK		20	14	4	0	0	0
GC	Gc-globulin	D6RF35_HUMAN	50Step_Domain_p400.0_to_450.0	400	450	50.0 AA STEP	50	9	6	10	0	0	0	0.16	0	8	0	ELSSFIDK ELSSFIDKGQELCADYSENTFTEYK KELSSFIDK LPDATPTELAK AKLPDATPTELAK ELSSFIDK KELSSFIDK LPDATPTELAK ELSSFIDK KELSSFIDK LPDATPTELAK		17	10	3	0	0	0
N/A	cDNA FLJ14473 fis; clone MAMMA1001080; highly similar to Homo sapiens SNC73 protein (SNC73) mRNA	Q96K68_HUMAN	50Step_Domain_p250.0_to_300.0	250	300	50.0 AA STEP	50	2	5	8	0	0	0	0.1	0	5	0	DASGVTFTWTPSSGK DASGVTFTWTPSSGK DASGVTFTWTPSSGK		4	5	1	0	0	0
N/A	cDNA FLJ14473 fis; clone MAMMA1001080; highly similar to Homo sapiens SNC73 protein (SNC73) mRNA	Q96K68_HUMAN	50Step_Domain_p300.0_to_350.0	300	350	50.0 AA STEP	50	2	5	8	0	0	0	0.1	0	5	0	DASGVTFTWTPSSGK DASGVTFTWTPSSGK DASGVTFTWTPSSGK		4	5	1	0	0	0
N/A	cDNA FLJ14473 fis; clone MAMMA1001080; highly similar to Homo sapiens SNC73 protein (SNC73) mRNA	Q96K68_HUMAN	50Step_Domain_p400.0_to_450.0	400	450	50.0 AA STEP	50	11	10	8	0	0	0	0.2	0	10	0	QEPSQGTTTFAVTSILR WLQGSQELPR QEPSQGTTTFAVTSILR WLQGSQELPR WLQGSQELPR		21	11	1	0	0	0
AEBP1	Adipocyte enhancer-binding protein 1	AEBP1_HUMAN	50Step_Domain_p750.0_to_800.0	750	800	50.0 AA STEP	50	44	38	37	34	22	31	0.22	0	40	29	AIIAWMEK GEDEDEVSEAQETPDHAIFR LVSYPYDMAR NPFVLGANLNGGER TPTQEQLLAAAMAAAR AIIAWMEK GEDEDEVSEAQETPDHAIFR LVSYPYDMAR TPTQEQLLAAAMAAAR TPTQEQLLAAAMAAARGEDEDEVSEAQETPDHAIFR AIIAWMEK GEDEDEVSEAQETPDHAIFR LVSYPYDMAR NPFVLGANLNGGER TPTQEQLLAAAMAAAR	AIIAWMEK GEDEDEVSEAQETPDHAIFR LVSYPYDMAR NPFVLGANLNGGER TPTQEQLLAAAMAAAR AIIAWMEK GEDEDEVSEAQETPDHAIFR LVSYPYDMAR NPFVLGANLNGGER TPTQEQLLAAAMAAAR AIIAWMEK GEDEDEVSEAQETPDHAIFR LVSYPYDMAR NPFVLGANLNGGER TPTQEQLLAAAMAAAR	34	37	54	18	13	33
COL5A1	Collagen alpha-1(V) chain	CO5A1_HUMAN	50Step_Domain_p1700.0_to_1750.0	1700	1750	50.0 AA STEP	50	0	2	1	5	7	7	-0.1	0	1	6	LLSYVDAEGNPVGVVQMTFLR LLSYVDAEGNPVGVVQMTFLR	ENPGSWFSEFK LLSYVDAEGNPVGVVQMTFLR ENPGSWFSEFK LLSYVDAEGNPVGVVQMTFLR ENPGSWFSEFK LLSYVDAEGNPVGVVQMTFLR	0	1	1	9	10	9
SEMA3D	Semaphorin-3D	SEM3D_HUMAN	50Step_Domain_p400.0_to_450.0	400	450	50.0 AA STEP	50	1	1	1	0	0	0	0.02	0	1	0	SVYPVAGGPTFK SVYPVAGGPTFK SVYPVAGGPTFK		1	1	1	0	0	0
GC	Gc-globulin	D6RF35_HUMAN	80Step_Domain_p0_to_80	0	80	80.0 AA STEP	80	3	7	0	0	0	0	0.0375	0.1578	3	0	FPSGTFEQVSQLVK EDFTSLSLVLYSR FPSGTFEQVSQLVK KFPSGTFEQVSQLVK		6	12	0	0	0	0
GC	Gc-globulin	D6RF35_HUMAN	80Step_Domain_p80.0_to_160.0	80	160	80.0 AA STEP	80	0	1	0	0	0	0	0	1	0	0	HQPQEFPTYVEPTNDEICEAFR		0	2	0	0	0	0
GC	Gc-globulin	D6RF35_HUMAN	80Step_Domain_p160.0_to_240.0	160	240	80.0 AA STEP	80	2	2	0	0	0	0	0.0125	1	1	0	HLSLLTTLSNR HLSLLTTLSNR		4	3	0	0	0	0
GC	Gc-globulin	D6RF35_HUMAN	80Step_Domain_p240.0_to_320.0	240	320	80.0 AA STEP	80	11	6	13	0	0	0	0.125	0	10	0	VPTADLEDVLPLAEDITNILSK VPTADLEDVLPLAEDITNILSK VPTADLEDVLPLAEDITNILSK		22	10	4	0	0	0
GC	Gc-globulin	D6RF35_HUMAN	80Step_Domain_p320.0_to_400.0	320	400	80.0 AA STEP	80	10	9	13	0	0	0	0.1375	0	11	0	ELSSFIDK ELSSFIDKGQELCADYSENTFTEYK KELSSFIDK THLPEVFLSK ELSSFIDK KELSSFIDK RTHLPEVFLSK THLPEVFLSK ELSSFIDK KELSSFIDK THLPEVFLSK		20	14	4	0	0	0
GC	Gc-globulin	D6RF35_HUMAN	80Step_Domain_p400.0_to_476.0	400	476	80.0 AA STEP	76	9	6	10	0	0	0	0.105263	0	8	0	ELSSFIDK ELSSFIDKGQELCADYSENTFTEYK KELSSFIDK LPDATPTELAK AKLPDATPTELAK ELSSFIDK KELSSFIDK LPDATPTELAK ELSSFIDK KELSSFIDK LPDATPTELAK		17	10	3	0	0	0
GC	Gc-globulin	D6RF35_HUMAN	100Step_Domain_p0_to_100	0	100	100.0 AA STEP	100	3	7	0	0	0	0	0.03	0.1395	3	0	FPSGTFEQVSQLVK EDFTSLSLVLYSR FPSGTFEQVSQLVK KFPSGTFEQVSQLVK		6	12	0	0	0	0
GC	Gc-globulin	D6RF35_HUMAN	100Step_Domain_p100.0_to_200.0	100	200	100.0 AA STEP	100	0	1	0	0	0	0	0	1	0	0	HQPQEFPTYVEPTNDEICEAFR		0	2	0	0	0	0
GC	Gc-globulin	D6RF35_HUMAN	100Step_Domain_p200.0_to_300.0	200	300	100.0 AA STEP	100	13	8	13	0	0	0	0.11	0	11	0	HLSLLTTLSNR VPTADLEDVLPLAEDITNILSK HLSLLTTLSNR VPTADLEDVLPLAEDITNILSK VPTADLEDVLPLAEDITNILSK		26	13	4	0	0	0
GC	Gc-globulin	D6RF35_HUMAN	100Step_Domain_p300.0_to_400.0	300	400	100.0 AA STEP	100	10	9	13	0	0	0	0.11	0	11	0	ELSSFIDK ELSSFIDKGQELCADYSENTFTEYK KELSSFIDK THLPEVFLSK ELSSFIDK KELSSFIDK RTHLPEVFLSK THLPEVFLSK ELSSFIDK KELSSFIDK THLPEVFLSK		20	14	4	0	0	0
GC	Gc-globulin	D6RF35_HUMAN	100Step_Domain_p400.0_to_476.0	400	476	100.0 AA STEP	76	9	6	10	0	0	0	0.105263	0	8	0	ELSSFIDK ELSSFIDKGQELCADYSENTFTEYK KELSSFIDK LPDATPTELAK AKLPDATPTELAK ELSSFIDK KELSSFIDK LPDATPTELAK ELSSFIDK KELSSFIDK LPDATPTELAK		17	10	3	0	0	0
LMNA	Prelamin-A/C	LMNA_HUMAN	Head	1	33	REGIONS	32	2	4	2	1	1	0	0.0625	0.9527	3	1	EDLQELNDR EDLQELNDR EDLQELNDR	EDLQELNDR EDLQELNDR	1	1	1	2	1	0
LMNA	Prelamin-A/C	LMNA_HUMAN	Coil 1A	34	70	REGIONS	36	9	8	4	3	4	2	0.111111	0.0329	7	3	EDLQELNDR ITESEEVVSR SLETENAGLR EDLQELNDR ITESEEVVSR EDLQELNDR SLETENAGLR	EDLQELNDR ITESEEVVSR SLETENAGLR EDLQELNDR ITESEEVVSR ITESEEVVSR SLETENAGLR	5	2	2	5	4	3
LMNA	Prelamin-A/C	LMNA_HUMAN	Linker 1	71	80	REGIONS	9	2	4	0	2	6	2	-0.111111	1	2	3	ITESEEVVSR ITESEEVVSR	AAYEAELGDAR ITESEEVVSR AAYEAELGDAR ITESEEVVSR AAYEAELGDAR ITESEEVVSR	1	1	0	3	6	4
LMNA	Prelamin-A/C	LMNA_HUMAN	Coil 1B	81	218	REGIONS	137	4	0	6	6	8	6	-0.0291971	0.1134	3	7	DLEALLNSK LEAALGEAK DLEALLNSK NIYSEELR TLEGELHDLR	AAYEAELGDAR DLEALLNSK EAALSTALSEK EGDLIAAQAR LEAALGEAK NIYSEELR AAYEAELGDAR DLEALLNSK EAALSTALSEK LEAALGEAK QLQDEMLR AAYEAELGDAR DLEALLNSK EAALSTALSEK EGDLIAAQAR LEAALGEAK NIYSEELR QLQDEMLR TLEGELHDLR	2	0	3	9	8	11
LMNA	Prelamin-A/C	LMNA_HUMAN	Linker 2	219	242	REGIONS	23	0	0	0	1	1	1	-0.0434783	1	0	1		LADALQELR LADALQELR LADALQELR	0	0	0	2	1	2
LMNA	Prelamin-A/C	LMNA_HUMAN	Coil 2	243	383	REGIONS	140	2	4	2	6	4	5	-0.0142857	0.5894	3	5	LRDLEDSLAR IDSLSAQLSQLQK DLEDSLAR	DLEDSLAR IDSLSAQLSQLQK LADALQELR LRDLEDSLAR MQQQLDEYQELLDIK AQHEDQVEQYK DLEDSLAR LADALQELR NSNLVGAAHEELQQSR DLEDSLAR IDSLSAQLSQLQK LADALQELR LLEGEEER MQQQLDEYQELLDIK NSNLVGAAHEELQQSR	1	1	1	9	4	9
LMNA	Prelamin-A/C	LMNA_HUMAN	Tail	384	664	REGIONS	280	2	4	4	1	0	3	0.00714286	0.9527	3	1	VAVEEVDEEGK VAVEEVDEEGK VAVEEVDEEGK	QNGDDPLLTYR SNEDQSMGNWQIK LLEGEEER QNGDDPLLTYR SNEDQSMGNWQIK SVGGSGGGSFGDNLVTR VAVEEVDEEGK VAVEEVDEEGKFVR	1	1	2	2	0	6
LMNA	Prelamin-A/C	LMNA_HUMAN	IF rod	31	387	DOMAINS	356	14	12	12	15	16	13	-0.00561798	0.161	13	15	DLEALLNSK EDLQELNDR ITESEEVVSR LEAALGEAK LRDLEDSLAR SLETENAGLR EDLQELNDR IDSLSAQLSQLQK ITESEEVVSR DLEALLNSK DLEDSLAR EDLQELNDR NIYSEELR SLETENAGLR TLEGELHDLR	AAYEAELGDAR DLEALLNSK DLEDSLAR EAALSTALSEK EDLQELNDR EGDLIAAQAR IDSLSAQLSQLQK ITESEEVVSR LADALQELR LEAALGEAK LRDLEDSLAR MQQQLDEYQELLDIK NIYSEELR SLETENAGLR AAYEAELGDAR AQHEDQVEQYK DLEALLNSK DLEDSLAR EAALSTALSEK EDLQELNDR ITESEEVVSR LADALQELR LEAALGEAK NSNLVGAAHEELQQSR QLQDEMLR AAYEAELGDAR DLEALLNSK DLEDSLAR EAALSTALSEK EGDLIAAQAR IDSLSAQLSQLQK ITESEEVVSR LADALQELR LEAALGEAK LLEGEEER MQQQLDEYQELLD…	8	3	6	23	16	23
LMNA	Prelamin-A/C	LMNA_HUMAN	LTD	428	545	DOMAINS	117	2	4	4	1	0	2	0.017094	0.0958	3	1	VAVEEVDEEGK VAVEEVDEEGK VAVEEVDEEGK	QNGDDPLLTYR SNEDQSMGNWQIK QNGDDPLLTYR SNEDQSMGNWQIK VAVEEVDEEGK VAVEEVDEEGKFVR	1	1	2	2	0	4
SEMA3D	Semaphorin-3D	SEM3D_HUMAN	50Step_Domain_p600.0_to_650.0	600	650	50.0 AA STEP	50	1	1	1	0	0	0	0.02	0	1	0	TEYGLLIR TEYGLLIR TEYGLLIR		1	2	2	0	0	0
SEMA3D	Semaphorin-3D	SEM3D_HUMAN	50Step_Domain_p650.0_to_700.0	650	700	50.0 AA STEP	50	1	1	1	0	0	0	0.02	0	1	0	TEYGLLIR TEYGLLIR TEYGLLIR		1	2	2	0	0	0
N/A	cDNA FLJ56912; highly similar to Fibulin-2	B7Z9B8_HUMAN	50Step_Domain_p1150.0_to_1200.0	1150	1200	50.0 AA STEP	50	2	0	0	0	0	0	0.02	0	1	0	DFALDVEMK GNEEGYFGTR		3	0	0	0	0	0
VCAN	Versican core protein	CSPG2_HUMAN	50Step_Domain_p250.0_to_300.0	250	300	50.0 AA STEP	50	78	51	72	50	52	36	0.42	0	67	46	FTFEEAAK LATVGELQAAWR NGFDQCDYGWLSDASVR SPQETYDVYCYVDHLDGDVFHLTVPSK FTFEEAAK LATVGELQAAWR NGFDQCDYGWLSDASVR FTFEEAAK FTFEEAAKECENQDAR LATVGELQAAWR NGFDQCDYGWLSDASVR SPQETYDVYCYVDHLDGDVFHLTVPSK	FTFEEAAK FTFEEAAKECENQDAR LATVGELQAAWR NGFDQCDYGWLSDASVR FTFEEAAK FTFEEAAKECENQDAR LATVGELQAAWR NGFDQCDYGWLSDASVR SPQETYDVYCYVDHLDGDVFHLTVPSK FTFEEAAK FTFEEAAKECENQDAR LATVGELQAAWR NGFDQCDYGWLSDASVR	26	23	83	77	87	50
VCAN	Versican core protein	CSPG2_HUMAN	50Step_Domain_p300.0_to_350.0	300	350	50.0 AA STEP	50	36	29	35	16	14	17	0.34	0	33	16	NGFDQCDYGWLSDASVR NGFDQCDYGWLSDASVR AQCGGGLLGVR NGFDQCDYGWLSDASVR	AQCGGGLLGVR NGFDQCDYGWLSDASVR AQCGGGLLGVR NGFDQCDYGWLSDASVR FENQTGFPPPDSR NGFDQCDYGWLSDASVR	12	13	40	25	23	23
VCAN	Versican core protein	CSPG2_HUMAN	50Step_Domain_p1300.0_to_1350.0	1300	1350	50.0 AA STEP	50	15	13	26	31	30	43	-0.34	0	18	35	MSDLSVIGHPIDSESK FHPDINVYIIEVR MSDLSVIGHPIDSESK FHPDINVYIIEVR MSDLSVIGHPIDSESK	MSDLSVIGHPIDSESK MSDLSVIGHPIDSESK MSDLSVIGHPIDSESK	5	6	30	48	50	59
VCAN	Versican core protein	CSPG2_HUMAN	50Step_Domain_p1350.0_to_1400.0	1350	1400	50.0 AA STEP	50	15	9	25	31	30	43	-0.38	0	16	35	MSDLSVIGHPIDSESK MSDLSVIGHPIDSESK MSDLSVIGHPIDSESK	MSDLSVIGHPIDSESK MSDLSVIGHPIDSESK MSDLSVIGHPIDSESK	5	4	29	48	50	59
VCAN	Versican core protein	CSPG2_HUMAN	50Step_Domain_p3150.0_to_3200.0	3150	3200	50.0 AA STEP	50	0	33	16	0	1	0	0.32	0	16	0	LQGAHLTSILSHEEQMFVNR LQGAHLTSILSHEEQMFVNR	LQGAHLTSILSHEEQMFVNR	0	15	18	0	2	0
VCAN	Versican core protein	CSPG2_HUMAN	50Step_Domain_p3200.0_to_3250.0	3200	3250	50.0 AA STEP	50	3	38	19	8	2	6	0.3	0	20	5	VGHDYQWIGLNDK LQGAHLTSILSHEEQMFVNR VGHDYQWIGLNDK LQGAHLTSILSHEEQMFVNR VGHDYQWIGLNDK	VGHDYQWIGLNDK LQGAHLTSILSHEEQMFVNR VGHDYQWIGLNDK VGHDYQWIGLNDK	1	17	22	13	3	8
CSPG2	Chondroitin sulfate proteoglycan 2 (Versican); isoform CRA_b	A0A024RAQ9_HUMAN	50Step_Domain_p250.0_to_300.0	250	300	50.0 AA STEP	50	78	51	72	50	52	36	0.42	0	67	46	FTFEEAAK LATVGELQAAWR NGFDQCDYGWLSDASVR SPQETYDVYCYVDHLDGDVFHLTVPSK FTFEEAAK LATVGELQAAWR NGFDQCDYGWLSDASVR FTFEEAAK FTFEEAAKECENQDAR LATVGELQAAWR NGFDQCDYGWLSDASVR SPQETYDVYCYVDHLDGDVFHLTVPSK	FTFEEAAK FTFEEAAKECENQDAR LATVGELQAAWR NGFDQCDYGWLSDASVR FTFEEAAK FTFEEAAKECENQDAR LATVGELQAAWR NGFDQCDYGWLSDASVR SPQETYDVYCYVDHLDGDVFHLTVPSK FTFEEAAK FTFEEAAKECENQDAR LATVGELQAAWR NGFDQCDYGWLSDASVR	26	23	83	77	87	50
CSPG2	Chondroitin sulfate proteoglycan 2 (Versican); isoform CRA_b	A0A024RAQ9_HUMAN	50Step_Domain_p300.0_to_350.0	300	350	50.0 AA STEP	50	36	29	35	16	14	17	0.34	0	33	16	NGFDQCDYGWLSDASVR NGFDQCDYGWLSDASVR AQCGGGLLGVR NGFDQCDYGWLSDASVR	AQCGGGLLGVR NGFDQCDYGWLSDASVR AQCGGGLLGVR NGFDQCDYGWLSDASVR FENQTGFPPPDSR NGFDQCDYGWLSDASVR	12	13	40	25	23	23
CSPG2	Chondroitin sulfate proteoglycan 2 (Versican); isoform CRA_b	A0A024RAQ9_HUMAN	50Step_Domain_p1300.0_to_1350.0	1300	1350	50.0 AA STEP	50	15	13	26	31	30	43	-0.34	0	18	35	MSDLSVIGHPIDSESK FHPDINVYIIEVR MSDLSVIGHPIDSESK FHPDINVYIIEVR MSDLSVIGHPIDSESK	MSDLSVIGHPIDSESK MSDLSVIGHPIDSESK MSDLSVIGHPIDSESK	5	6	30	48	50	59
CSPG2	Chondroitin sulfate proteoglycan 2 (Versican); isoform CRA_b	A0A024RAQ9_HUMAN	50Step_Domain_p1350.0_to_1400.0	1350	1400	50.0 AA STEP	50	15	9	25	31	30	43	-0.38	0	16	35	MSDLSVIGHPIDSESK MSDLSVIGHPIDSESK MSDLSVIGHPIDSESK	MSDLSVIGHPIDSESK MSDLSVIGHPIDSESK MSDLSVIGHPIDSESK	5	4	29	48	50	59
CSPG2	Chondroitin sulfate proteoglycan 2 (Versican); isoform CRA_b	A0A024RAQ9_HUMAN	50Step_Domain_p3150.0_to_3200.0	3150	3200	50.0 AA STEP	50	0	33	16	0	1	0	0.32	0	16	0	LQGAHLTSILSHEEQMFVNR LQGAHLTSILSHEEQMFVNR	LQGAHLTSILSHEEQMFVNR	0	15	18	0	2	0
LMNA	Prelamin-A/C	LMNA_HUMAN	80Step_Domain_p0_to_80	0	80	80.0 AA STEP	80	9	8	4	4	7	3	0.025	0.3672	7	5	EDLQELNDR ITESEEVVSR SLETENAGLR EDLQELNDR ITESEEVVSR EDLQELNDR SLETENAGLR	AAYEAELGDAR EDLQELNDR ITESEEVVSR SLETENAGLR AAYEAELGDAR EDLQELNDR ITESEEVVSR AAYEAELGDAR ITESEEVVSR SLETENAGLR	5	2	2	7	7	5
LMNA	Prelamin-A/C	LMNA_HUMAN	80Step_Domain_p80.0_to_160.0	80	160	80.0 AA STEP	80	2	0	4	4	6	4	-0.0375	0.1845	2	5	DLEALLNSK DLEALLNSK TLEGELHDLR	AAYEAELGDAR DLEALLNSK EAALSTALSEK EGDLIAAQAR AAYEAELGDAR DLEALLNSK EAALSTALSEK AAYEAELGDAR DLEALLNSK EAALSTALSEK EGDLIAAQAR TLEGELHDLR	1	0	2	7	6	7
LMNA	Prelamin-A/C	LMNA_HUMAN	80Step_Domain_p160.0_to_240.0	160	240	80.0 AA STEP	80	2	0	4	1	2	3	0	1	2	2	LEAALGEAK NIYSEELR TLEGELHDLR	LEAALGEAK NIYSEELR LEAALGEAK QLQDEMLR LEAALGEAK NIYSEELR QLQDEMLR TLEGELHDLR	1	0	2	2	2	5
LMNA	Prelamin-A/C	LMNA_HUMAN	80Step_Domain_p240.0_to_320.0	240	320	80.0 AA STEP	80	2	4	0	3	3	3	-0.0125	1	2	3	LRDLEDSLAR IDSLSAQLSQLQK	IDSLSAQLSQLQK LADALQELR LRDLEDSLAR AQHEDQVEQYK LADALQELR NSNLVGAAHEELQQSR IDSLSAQLSQLQK LADALQELR NSNLVGAAHEELQQSR	1	1	0	5	3	5
LMNA	Prelamin-A/C	LMNA_HUMAN	80Step_Domain_p320.0_to_400.0	320	400	80.0 AA STEP	80	2	0	2	4	1	2	-0.0125	1	1	2	LRDLEDSLAR DLEDSLAR	DLEDSLAR LRDLEDSLAR MQQQLDEYQELLDIK DLEDSLAR DLEDSLAR LLEGEEER MQQQLDEYQELLDIK	1	0	1	6	1	4
LMNA	Prelamin-A/C	LMNA_HUMAN	80Step_Domain_p400.0_to_480.0	400	480	80.0 AA STEP	80	2	4	4	1	0	2	0.025	0.3672	3	1	VAVEEVDEEGK VAVEEVDEEGK VAVEEVDEEGK	QNGDDPLLTYR SNEDQSMGNWQIK QNGDDPLLTYR SNEDQSMGNWQIK VAVEEVDEEGK VAVEEVDEEGKFVR	1	1	2	2	0	4
LMNA	Prelamin-A/C	LMNA_HUMAN	80Step_Domain_p480.0_to_560.0	480	560	80.0 AA STEP	80	0	0	0	1	0	1	-0.0125	1	0	1		QNGDDPLLTYR QNGDDPLLTYR	0	0	0	1	0	1
LMNA	Prelamin-A/C	LMNA_HUMAN	80Step_Domain_p560.0_to_640.0	560	640	80.0 AA STEP	80	0	0	0	0	0	1	0	1	0	0		SVGGSGGGSFGDNLVTR	0	0	0	0	0	1
LMNA	Prelamin-A/C	LMNA_HUMAN	80Step_Domain_p640.0_to_664.0	640	664	80.0 AA STEP	24	0	0	0	0	0	1	0	1	0	0		SVGGSGGGSFGDNLVTR	0	0	0	0	0	1
LMNA	Prelamin-A/C	LMNA_HUMAN	100Step_Domain_p0_to_100	0	100	100.0 AA STEP	100	9	8	4	4	7	3	0.02	0.3521	7	5	EDLQELNDR ITESEEVVSR SLETENAGLR EDLQELNDR ITESEEVVSR EDLQELNDR SLETENAGLR	AAYEAELGDAR EDLQELNDR ITESEEVVSR SLETENAGLR AAYEAELGDAR EDLQELNDR ITESEEVVSR AAYEAELGDAR ITESEEVVSR SLETENAGLR	5	2	2	7	7	5
LMNA	Prelamin-A/C	LMNA_HUMAN	100Step_Domain_p100.0_to_200.0	100	200	100.0 AA STEP	100	4	0	4	4	5	5	-0.02	0.6335	3	5	DLEALLNSK LEAALGEAK DLEALLNSK TLEGELHDLR	DLEALLNSK EAALSTALSEK EGDLIAAQAR LEAALGEAK DLEALLNSK EAALSTALSEK LEAALGEAK QLQDEMLR DLEALLNSK EAALSTALSEK EGDLIAAQAR LEAALGEAK QLQDEMLR TLEGELHDLR	2	0	2	6	5	8
LMNA	Prelamin-A/C	LMNA_HUMAN	100Step_Domain_p200.0_to_300.0	200	300	100.0 AA STEP	100	0	4	2	3	3	3	-0.01	1	2	3	IDSLSAQLSQLQK NIYSEELR	IDSLSAQLSQLQK LADALQELR NIYSEELR AQHEDQVEQYK LADALQELR NSNLVGAAHEELQQSR IDSLSAQLSQLQK LADALQELR NIYSEELR NSNLVGAAHEELQQSR	0	1	1	4	3	6
LMNA	Prelamin-A/C	LMNA_HUMAN	100Step_Domain_p300.0_to_400.0	300	400	100.0 AA STEP	100	2	4	2	4	1	3	0	1	3	3	LRDLEDSLAR IDSLSAQLSQLQK DLEDSLAR	DLEDSLAR IDSLSAQLSQLQK LRDLEDSLAR MQQQLDEYQELLDIK DLEDSLAR DLEDSLAR IDSLSAQLSQLQK LLEGEEER MQQQLDEYQELLDIK	1	1	1	7	1	5
LMNA	Prelamin-A/C	LMNA_HUMAN	100Step_Domain_p400.0_to_500.0	400	500	100.0 AA STEP	100	2	4	4	1	0	2	0.02	0.3521	3	1	VAVEEVDEEGK VAVEEVDEEGK VAVEEVDEEGK	QNGDDPLLTYR SNEDQSMGNWQIK QNGDDPLLTYR SNEDQSMGNWQIK VAVEEVDEEGK VAVEEVDEEGKFVR	1	1	2	2	0	4
LMNA	Prelamin-A/C	LMNA_HUMAN	100Step_Domain_p500.0_to_600.0	500	600	100.0 AA STEP	100	0	0	0	0	0	0	0	1	0	0			0	0	0	0	0	0
LMNA	Prelamin-A/C	LMNA_HUMAN	100Step_Domain_p600.0_to_664.0	600	664	100.0 AA STEP	64	0	0	0	0	0	1	0	1	0	0		SVGGSGGGSFGDNLVTR	0	0	0	0	0	1
N/A	cDNA FLJ14473 fis; clone MAMMA1001080; highly similar to Homo sapiens SNC73 protein (SNC73) mRNA	Q96K68_HUMAN	Ig-like	31	115	DOMAINS	84	1	0	0	0	0	0	0	1	0	0	GLEWVSSISSR		1	0	0	0	0	0
N/A	cDNA FLJ14473 fis; clone MAMMA1001080; highly similar to Homo sapiens SNC73 protein (SNC73) mRNA	Q96K68_HUMAN	Ig-like_147_239	147	239	DOMAINS	92	0	0	0	0	0	0	0	1	0	0			0	0	0	0	0	0
N/A	cDNA FLJ14473 fis; clone MAMMA1001080; highly similar to Homo sapiens SNC73 protein (SNC73) mRNA	Q96K68_HUMAN	Ig-like_266_361	266	361	DOMAINS	95	4	5	8	0	0	0	0.0631579	0	6	0	DASGVTFTWTPSSGK TPLTATLSK DASGVTFTWTPSSGK DASGVTFTWTPSSGK		8	5	1	0	0	0
N/A	cDNA FLJ14473 fis; clone MAMMA1001080; highly similar to Homo sapiens SNC73 protein (SNC73) mRNA	Q96K68_HUMAN	Ig-like_369_471	369	471	DOMAINS	102	11	10	8	0	0	0	0.0980392	0	10	0	QEPSQGTTTFAVTSILR WLQGSQELPR QEPSQGTTTFAVTSILR WLQGSQELPR WLQGSQELPR		21	11	1	0	0	0
CSPG2	Chondroitin sulfate proteoglycan 2 (Versican); isoform CRA_b	A0A024RAQ9_HUMAN	50Step_Domain_p3200.0_to_3250.0	3200	3250	50.0 AA STEP	50	3	38	19	8	2	6	0.3	0	20	5	VGHDYQWIGLNDK LQGAHLTSILSHEEQMFVNR VGHDYQWIGLNDK LQGAHLTSILSHEEQMFVNR VGHDYQWIGLNDK	VGHDYQWIGLNDK LQGAHLTSILSHEEQMFVNR VGHDYQWIGLNDK VGHDYQWIGLNDK	1	17	22	13	3	8
N/A	Chondroitin sulfate proteoglycan 2 (Versican) variant	Q59FG9_HUMAN	50Step_Domain_p300.0_to_350.0	300	350	50.0 AA STEP	50	63	42	51	40	44	30	0.28	0	52	38	LATVGELQAAWR NGFDQCDYGWLSDASVR LATVGELQAAWR NGFDQCDYGWLSDASVR AQCGGGLLGVR LATVGELQAAWR NGFDQCDYGWLSDASVR	AQCGGGLLGVR LATVGELQAAWR NGFDQCDYGWLSDASVR AQCGGGLLGVR LATVGELQAAWR NGFDQCDYGWLSDASVR FENQTGFPPPDSR LATVGELQAAWR NGFDQCDYGWLSDASVR	21	19	59	62	73	42
N/A	Chondroitin sulfate proteoglycan 2 (Versican) variant	Q59FG9_HUMAN	50Step_Domain_p1350.0_to_1400.0	1350	1400	50.0 AA STEP	50	15	9	25	31	30	43	-0.38	0	16	35	MSDLSVIGHPIDSESK MSDLSVIGHPIDSESK MSDLSVIGHPIDSESK	MSDLSVIGHPIDSESK MSDLSVIGHPIDSESK MSDLSVIGHPIDSESK	5	4	29	48	50	59
N/A	Chondroitin sulfate proteoglycan 2 (Versican) variant	Q59FG9_HUMAN	50Step_Domain_p2100.0_to_2150.0	2100	2150	50.0 AA STEP	50	9	9	7	19	19	15	-0.2	0	8	18	QEIESETTSEEQIQEEK QEIESETTSEEQIQEEK QEVNPVRQEIESETTSEEQIQEEK QEIESETTSEEQIQEEK	QEIESETTSEEQIQEEK QEVNPVRQEIESETTSEEQIQEEK QEIESETTSEEQIQEEK QEVNPVRQEIESETTSEEQIQEEK QEIESETTSEEQIQEEK QEVNPVRQEIESETTSEEQIQEEK	3	4	8	30	31	21
N/A	Chondroitin sulfate proteoglycan 2 (Versican) variant	Q59FG9_HUMAN	50Step_Domain_p3200.0_to_3250.0	3200	3250	50.0 AA STEP	50	3	38	19	8	2	6	0.3	0	20	5	VGHDYQWIGLNDK LQGAHLTSILSHEEQMFVNR VGHDYQWIGLNDK LQGAHLTSILSHEEQMFVNR VGHDYQWIGLNDK	VGHDYQWIGLNDK LQGAHLTSILSHEEQMFVNR VGHDYQWIGLNDK VGHDYQWIGLNDK	1	17	22	13	3	8
N/A	Chordin	B7Z1H7_HUMAN	50Step_Domain_p50.0_to_100.0	50	100	50.0 AA STEP	50	2	3	3	2	0	0	0.04	0	3	1	GDGHTDFVALLTGPR GDGHTDFVALLTGPR GDGHTDFVALLTGPR	GDGHTDFVALLTGPR QPSGLSFEYPR	1	2	4	2	0	0
N/A	Chordin	B7Z1H7_HUMAN	50Step_Domain_p100.0_to_150.0	100	150	50.0 AA STEP	50	2	3	3	1	0	0	0.06	0	3	0	GDGHTDFVALLTGPR GDGHTDFVALLTGPR GDGHTDFVALLTGPR	GDGHTDFVALLTGPR	1	2	4	1	0	0
N/A	Chordin	B7Z1H7_HUMAN	50Step_Domain_p550.0_to_600.0	550	600	50.0 AA STEP	50	0	0	0	2	2	2	-0.04	0	0	2		LEAAGAEGVR LEAAGAEGVR LEAAGAEGVR	0	0	0	2	1	1
CHRD	Chordin	E7ESX1_HUMAN	50Step_Domain_p150.0_to_200.0	150	200	50.0 AA STEP	50	2	3	3	1	0	0	0.06	0	3	0	GDGHTDFVALLTGPR GDGHTDFVALLTGPR GDGHTDFVALLTGPR	GDGHTDFVALLTGPR	1	2	4	1	0	0
CHRD	Chordin	E7ESX1_HUMAN	50Step_Domain_p650.0_to_700.0	650	700	50.0 AA STEP	50	0	0	0	2	2	2	-0.04	0	0	2		LEAAGAEGVR LEAAGAEGVR LEAAGAEGVR	0	0	0	2	1	1
N/A	cDNA FLJ14473 fis; clone MAMMA1001080; highly similar to Homo sapiens SNC73 protein (SNC73) mRNA	Q96K68_HUMAN	80Step_Domain_p0_to_80	0	80	80.0 AA STEP	80	1	0	0	0	0	0	0	1	0	0	GLEWVSSISSR		1	0	0	0	0	0
N/A	cDNA FLJ14473 fis; clone MAMMA1001080; highly similar to Homo sapiens SNC73 protein (SNC73) mRNA	Q96K68_HUMAN	80Step_Domain_p80.0_to_160.0	80	160	80.0 AA STEP	80	0	0	0	0	0	0	0	1	0	0			0	0	0	0	0	0
N/A	cDNA FLJ14473 fis; clone MAMMA1001080; highly similar to Homo sapiens SNC73 protein (SNC73) mRNA	Q96K68_HUMAN	80Step_Domain_p160.0_to_240.0	160	240	80.0 AA STEP	80	0	0	0	0	0	0	0	1	0	0			0	0	0	0	0	0
N/A	cDNA FLJ14473 fis; clone MAMMA1001080; highly similar to Homo sapiens SNC73 protein (SNC73) mRNA	Q96K68_HUMAN	80Step_Domain_p240.0_to_320.0	240	320	80.0 AA STEP	80	2	5	8	0	0	0	0.0625	0	5	0	DASGVTFTWTPSSGK DASGVTFTWTPSSGK DASGVTFTWTPSSGK		4	5	1	0	0	0
N/A	cDNA FLJ14473 fis; clone MAMMA1001080; highly similar to Homo sapiens SNC73 protein (SNC73) mRNA	Q96K68_HUMAN	80Step_Domain_p320.0_to_400.0	320	400	80.0 AA STEP	80	2	0	0	0	0	0	0.0125	1	1	0	TPLTATLSK		4	0	0	0	0	0
N/A	cDNA FLJ14473 fis; clone MAMMA1001080; highly similar to Homo sapiens SNC73 protein (SNC73) mRNA	Q96K68_HUMAN	80Step_Domain_p400.0_to_480.0	400	480	80.0 AA STEP	80	11	10	8	0	0	0	0.125	0	10	0	QEPSQGTTTFAVTSILR WLQGSQELPR QEPSQGTTTFAVTSILR WLQGSQELPR WLQGSQELPR		21	11	1	0	0	0
N/A	cDNA FLJ14473 fis; clone MAMMA1001080; highly similar to Homo sapiens SNC73 protein (SNC73) mRNA	Q96K68_HUMAN	80Step_Domain_p480.0_to_494.0	480	494	80.0 AA STEP	14	0	0	0	0	0	0	0	1	0	0			0	0	0	0	0	0
N/A	cDNA FLJ14473 fis; clone MAMMA1001080; highly similar to Homo sapiens SNC73 protein (SNC73) mRNA	Q96K68_HUMAN	100Step_Domain_p0_to_100	0	100	100.0 AA STEP	100	1	0	0	0	0	0	0	1	0	0	GLEWVSSISSR		1	0	0	0	0	0
N/A	cDNA FLJ14473 fis; clone MAMMA1001080; highly similar to Homo sapiens SNC73 protein (SNC73) mRNA	Q96K68_HUMAN	100Step_Domain_p100.0_to_200.0	100	200	100.0 AA STEP	100	0	0	0	0	0	0	0	1	0	0			0	0	0	0	0	0
N/A	cDNA FLJ14473 fis; clone MAMMA1001080; highly similar to Homo sapiens SNC73 protein (SNC73) mRNA	Q96K68_HUMAN	100Step_Domain_p200.0_to_300.0	200	300	100.0 AA STEP	100	2	5	8	0	0	0	0.05	0.0005	5	0	DASGVTFTWTPSSGK DASGVTFTWTPSSGK DASGVTFTWTPSSGK		4	5	1	0	0	0
N/A	cDNA FLJ14473 fis; clone MAMMA1001080; highly similar to Homo sapiens SNC73 protein (SNC73) mRNA	Q96K68_HUMAN	100Step_Domain_p300.0_to_400.0	300	400	100.0 AA STEP	100	4	5	8	0	0	0	0.06	0	6	0	DASGVTFTWTPSSGK TPLTATLSK DASGVTFTWTPSSGK DASGVTFTWTPSSGK		8	5	1	0	0	0
N/A	cDNA FLJ14473 fis; clone MAMMA1001080; highly similar to Homo sapiens SNC73 protein (SNC73) mRNA	Q96K68_HUMAN	100Step_Domain_p400.0_to_494.0	400	494	100.0 AA STEP	94	11	10	8	0	0	0	0.106383	0	10	0	QEPSQGTTTFAVTSILR WLQGSQELPR QEPSQGTTTFAVTSILR WLQGSQELPR WLQGSQELPR		21	11	1	0	0	0
N/A	Immunoglobulin delta heavy chain	IGD_HUMAN	Ig-like 1	1	97	DOMAINS	96	2	1	0	0	0	0	0.0104167	0.7504	1	0	NQFSLNLR VTISVDTSR VTISVDTSR		3	1	0	0	0	0
N/A	Immunoglobulin delta heavy chain	IGD_HUMAN	Ig-like 2	135	227	DOMAINS	92	2	1	0	0	0	0	0.0108696	0.7504	1	0	DSYYMTSSQLSTPLQQWR DSYYMTSSQLSTPLQQWR		3	1	0	0	0	0
N/A	Immunoglobulin delta heavy chain	IGD_HUMAN	Ig-like 3	304	392	DOMAINS	88	3	3	0	0	0	0	0.0227273	0.0564	2	0	DAHLTWEVAGK VPTGGVEEGLLER DAHLTWEVAGK VPTGGVEEGLLER		5	3	0	0	0	0
N/A	Immunoglobulin delta heavy chain	IGD_HUMAN	Ig-like 4	396	502	DOMAINS	106	2	2	0	0	0	0	0.00943396	0.3404	1	0	SLEVSYVTDHGPM SLEVSYVTDHGPM		3	2	0	0	0	0
CHRD	Chordin	CHRD_HUMAN	50Step_Domain_p150.0_to_200.0	150	200	50.0 AA STEP	50	2	3	3	1	0	0	0.06	0	3	0	GDGHTDFVALLTGPR GDGHTDFVALLTGPR GDGHTDFVALLTGPR	GDGHTDFVALLTGPR	1	2	4	1	0	0
CHRD	Chordin	CHRD_HUMAN	50Step_Domain_p650.0_to_700.0	650	700	50.0 AA STEP	50	0	0	0	2	2	2	-0.04	0	0	2		LEAAGAEGVR LEAAGAEGVR LEAAGAEGVR	0	0	0	2	1	1
SERPIND1	Heparin cofactor 2	HEP2_HUMAN	50Step_Domain_p200.0_to_250.0	200	250	50.0 AA STEP	50	7	9	0	0	0	0	0.1	0	5	0	EYYFAEAQIADFSDPAFISK QFPILLDFK SVNDLYIQK YEITTIHNLFR EYYFAEAQIADFSDPAFISK QFPILLDFK SVNDLYIQK YEITTIHNLFR		13	18	0	0	0	0
ITIH4	Inter-alpha-trypsin inhibitor heavy chain H4	ITIH4_HUMAN	50Step_Domain_p50.0_to_100.0	50	100	50.0 AA STEP	50	14	10	8	0	0	0	0.22	0	11	0	AEAQAQYSAAVAK ANTVQEATFQMELPK AEAQAQYSAAVAK ANTVQEATFQMELPK ANTVQEATFQMELPK		27	11	1	0	0	0
ITIH4	Inter-alpha-trypsin inhibitor heavy chain H4	ITIH4_HUMAN	50Step_Domain_p750.0_to_800.0	750	800	50.0 AA STEP	50	9	10	16	0	0	0	0.24	0	12	0	AGFSWIEVTFK NPLVWVHASPEHVVVTR QGPVNLLSDPEQGVEVTGQYER NPLVWVHASPEHVVVTR QGPVNLLSDPEQGVEVTGQYER NPLVWVHASPEHVVVTR QGPVNLLSDPEQGVEVTGQYER		17	11	2	0	0	0
ITIH4	Inter-alpha-trypsin inhibitor heavy chain H4	ITIH4_HUMAN	50Step_Domain_p800.0_to_850.0	800	850	50.0 AA STEP	50	10	17	31	0	0	0	0.38	0	19	0	ETLFSVMPGLK NPLVWVHASPEHVVVTR TGLLLLSDPDK ETLFSVMPGLK NPLVWVHASPEHVVVTR TGLLLLSDPDK VTIGLLFWDGR ETLFSVMPGLK NPLVWVHASPEHVVVTR TGLLLLSDPDK		20	19	4	0	0	0
N/A	Complement component 8 subunit beta	A8K9M5_HUMAN	50Step_Domain_p250.0_to_300.0	250	300	50.0 AA STEP	50	5	6	7	0	0	0	0.12	0	6	0	IPGIFELGISSQSDR SDLEVAHYK SGFSFGFK IPGIFELGISSQSDR SDLEVAHYK SGFSFGFK IPGIFELGISSQSDR		6	11	2	0	0	0
N/A	Complement component 8 subunit beta	A8K9M5_HUMAN	50Step_Domain_p300.0_to_350.0	300	350	50.0 AA STEP	50	5	5	10	0	0	0	0.14	0	7	0	DFGTHYITEAVLGGIYEYTLVMNK LPLEYSYGEYR SDLEVAHYK SLMLHYEFLQR DFGTHYITEAVLGGIYEYTLVMNK LPLEYSYGEYR SDLEVAHYK SLMLHYEFLQR LPLEYSYGEYR		6	9	3	0	0	0
C8B	Complement component C8 beta chain	CO8B_HUMAN	50Step_Domain_p250.0_to_300.0	250	300	50.0 AA STEP	50	5	6	7	0	0	0	0.12	0	6	0	IPGIFELGISSQSDR SDLEVAHYK SGFSFGFK IPGIFELGISSQSDR SDLEVAHYK SGFSFGFK IPGIFELGISSQSDR		6	11	2	0	0	0
C8B	Complement component C8 beta chain	CO8B_HUMAN	50Step_Domain_p300.0_to_350.0	300	350	50.0 AA STEP	50	5	5	10	0	0	0	0.14	0	7	0	DFGTHYITEAVLGGIYEYTLVMNK LPLEYSYGEYR SDLEVAHYK SLMLHYEFLQR DFGTHYITEAVLGGIYEYTLVMNK LPLEYSYGEYR SDLEVAHYK SLMLHYEFLQR LPLEYSYGEYR		6	9	3	0	0	0
N/A	Complement component 8 subunit beta	B7Z555_HUMAN	50Step_Domain_p200.0_to_250.0	200	250	50.0 AA STEP	50	5	6	7	0	0	0	0.12	0	6	0	IPGIFELGISSQSDR SDLEVAHYK SGFSFGFK IPGIFELGISSQSDR SDLEVAHYK SGFSFGFK IPGIFELGISSQSDR		6	11	2	0	0	0
N/A	Immunoglobulin delta heavy chain	IGD_HUMAN	80Step_Domain_p0_to_80	0	80	80.0 AA STEP	80	2	1	0	0	0	0	0.0125	0.6076	1	0	NQFSLNLR VTISVDTSR VTISVDTSR		3	1	0	0	0	0
N/A	Immunoglobulin delta heavy chain	IGD_HUMAN	80Step_Domain_p80.0_to_160.0	80	160	80.0 AA STEP	80	1	0	0	0	0	0	0	1	0	0	NQFSLNLR		1	0	0	0	0	0
N/A	Immunoglobulin delta heavy chain	IGD_HUMAN	80Step_Domain_p160.0_to_240.0	160	240	80.0 AA STEP	80	2	1	0	0	0	0	0.0125	0.6076	1	0	DSYYMTSSQLSTPLQQWR DSYYMTSSQLSTPLQQWR		3	1	0	0	0	0
N/A	Immunoglobulin delta heavy chain	IGD_HUMAN	80Step_Domain_p240.0_to_320.0	240	320	80.0 AA STEP	80	0	0	0	0	0	0	0	1	0	0			0	0	0	0	0	0
N/A	Immunoglobulin delta heavy chain	IGD_HUMAN	80Step_Domain_p320.0_to_400.0	320	400	80.0 AA STEP	80	3	3	0	0	0	0	0.025	0.0098	2	0	DAHLTWEVAGK VPTGGVEEGLLER DAHLTWEVAGK VPTGGVEEGLLER		5	3	0	0	0	0
N/A	Immunoglobulin delta heavy chain	IGD_HUMAN	80Step_Domain_p400.0_to_480.0	400	480	80.0 AA STEP	80	0	0	0	0	0	0	0	1	0	0			0	0	0	0	0	0
N/A	Immunoglobulin delta heavy chain	IGD_HUMAN	80Step_Domain_p480.0_to_512.0	480	512	80.0 AA STEP	32	2	2	0	0	0	0	0.03125	0.1757	1	0	SLEVSYVTDHGPM SLEVSYVTDHGPM		3	2	0	0	0	0
N/A	Immunoglobulin delta heavy chain	IGD_HUMAN	100Step_Domain_p0_to_100	0	100	100.0 AA STEP	100	2	1	0	0	0	0	0.01	0.7818	1	0	NQFSLNLR VTISVDTSR VTISVDTSR		3	1	0	0	0	0
N/A	Immunoglobulin delta heavy chain	IGD_HUMAN	100Step_Domain_p100.0_to_200.0	100	200	100.0 AA STEP	100	2	1	0	0	0	0	0.01	0.7818	1	0	DSYYMTSSQLSTPLQQWR DSYYMTSSQLSTPLQQWR		3	1	0	0	0	0
N/A	Immunoglobulin delta heavy chain	IGD_HUMAN	100Step_Domain_p200.0_to_300.0	200	300	100.0 AA STEP	100	2	1	0	0	0	0	0.01	0.7818	1	0	DSYYMTSSQLSTPLQQWR DSYYMTSSQLSTPLQQWR		3	1	0	0	0	0
N/A	Immunoglobulin delta heavy chain	IGD_HUMAN	100Step_Domain_p300.0_to_400.0	300	400	100.0 AA STEP	100	3	3	0	0	0	0	0.02	0.027	2	0	DAHLTWEVAGK VPTGGVEEGLLER DAHLTWEVAGK VPTGGVEEGLLER		5	3	0	0	0	0
N/A	Immunoglobulin delta heavy chain	IGD_HUMAN	100Step_Domain_p400.0_to_500.0	400	500	100.0 AA STEP	100	2	2	0	0	0	0	0.01	0.285	1	0	SLEVSYVTDHGPM SLEVSYVTDHGPM		3	2	0	0	0	0
N/A	Immunoglobulin delta heavy chain	IGD_HUMAN	100Step_Domain_p500.0_to_512.0	500	512	100.0 AA STEP	12	0	0	0	0	0	0	0	1	0	0			0	0	0	0	0	0
IGK@	IGK@ protein	Q6P5S8_HUMAN	Ig-like	16	119	DOMAINS	103	3	3	0	0	0	0	0.0194175	0.161	2	0	FSGSGSGTDFTLTITR LLIYGASSR FSGSGSGTDFTLTITR LLIYGASSR		5	4	0	0	0	0
IGK@	IGK@ protein	Q6P5S8_HUMAN	Ig-like_135_232	135	232	DOMAINS	97	97	97	100	100	100	100	-0.0206186	0.161	98	100	DSTYSLSSTLTLSK RTVAAPSVFIFPPSDEQLK SGTASVVCLLNNFYPR TVAAPSVFIFPPSDEQLK VDNALQSGNSQESVTEQDSK VDNALQSGNSQESVTEQDSKDSTYSLSSTLTLSK VQWKVDNALQSGNSQESVTEQDSK VYACEVTHQGLSSPVTK DSTYSLSSTLTLSK RTVAAPSVFIFPPSDEQLK SGTASVVCLLNNFYPR TVAAPSVFIFPPSDEQLK VDNALQSGNSQESVTEQDSK VDNALQSGNSQESVTEQDSKDSTYSLSSTLTLSK VYACEVTHQGLSSPVTK DSTYSLSSTLTLSK SGTASVVCLLNNFYPR TVAAPSVFIFPPSDEQLK VDNALQSGNSQESVTEQDSK	DSTYSLSSTLTLSK TVAAPSVFIFPPSDEQLK VDNALQSGNSQESVTEQDSK DSTYSLSSTLTLSK SGTASVVCLLNNFYPR TVAAPSVFIFPPSDEQLK VDNALQSGNSQESVTEQDSK DSTYSLSSTLTLSK TVAAPSVFIFPPSDEQLK VDNALQSGNSQESVTEQDSK	185	153	49	9	16	24
N/A	Complement component 8 subunit beta	B7Z555_HUMAN	50Step_Domain_p250.0_to_300.0	250	300	50.0 AA STEP	50	5	5	10	0	0	0	0.14	0	7	0	DFGTHYITEAVLGGIYEYTLVMNK LPLEYSYGEYR SDLEVAHYK SLMLHYEFLQR DFGTHYITEAVLGGIYEYTLVMNK LPLEYSYGEYR SDLEVAHYK SLMLHYEFLQR LPLEYSYGEYR		6	9	3	0	0	0
N/A	Complement component 8 subunit beta	B7ZA94_HUMAN	50Step_Domain_p200.0_to_250.0	200	250	50.0 AA STEP	50	5	6	7	0	0	0	0.12	0	6	0	IPGIFELGISSQSDR SDLEVAHYK SGFSFGFK IPGIFELGISSQSDR SDLEVAHYK SGFSFGFK IPGIFELGISSQSDR		6	11	2	0	0	0
N/A	Complement component 8 subunit beta	B7ZA94_HUMAN	50Step_Domain_p250.0_to_300.0	250	300	50.0 AA STEP	50	5	5	10	0	0	0	0.14	0	7	0	DFGTHYITEAVLGGIYEYTLVMNK LPLEYSYGEYR SDLEVAHYK SLMLHYEFLQR DFGTHYITEAVLGGIYEYTLVMNK LPLEYSYGEYR SDLEVAHYK SLMLHYEFLQR LPLEYSYGEYR		6	9	3	0	0	0
C8A	Complement component C8 alpha chain	CO8A_HUMAN	50Step_Domain_p450.0_to_500.0	450	500	50.0 AA STEP	50	5	4	0	0	0	0	0.06	0	3	0	ALDQYLMEFNACR HTSLGPLEAK YNPVVIDFEMQPIHEVLR YNPVVIDFEMQPIHEVLR		9	8	0	0	0	0
CRLF1	Cytokine receptor-like factor 1	CRLF1_HUMAN	50Step_Domain_p200.0_to_250.0	200	250	50.0 AA STEP	50	2	3	4	0	0	0	0.06	0	3	0	VGGLEDQLSVR DLALFTPYEIWVEATNR VGGLEDQLSVR DLALFTPYEIWVEATNR VGGLEDQLSVR		2	5	5	0	0	0
IGK@	IGK@ protein	Q6P5S8_HUMAN	80Step_Domain_p0_to_80	0	80	80.0 AA STEP	80	2	1	0	0	0	0	0.0125	1	1	0	LLIYGASSR LLIYGASSR		3	1	0	0	0	0
IGK@	IGK@ protein	Q6P5S8_HUMAN	80Step_Domain_p80.0_to_160.0	80	160	80.0 AA STEP	80	21	46	43	11	19	21	0.25	0.0228	37	17	FSGSGSGTDFTLTITR RTVAAPSVFIFPPSDEQLK SGTASVVCLLNNFYPR TVAAPSVFIFPPSDEQLK FSGSGSGTDFTLTITR RTVAAPSVFIFPPSDEQLK SGTASVVCLLNNFYPR TVAAPSVFIFPPSDEQLK SGTASVVCLLNNFYPR TVAAPSVFIFPPSDEQLK	TVAAPSVFIFPPSDEQLK SGTASVVCLLNNFYPR TVAAPSVFIFPPSDEQLK TVAAPSVFIFPPSDEQLK	41	72	21	1	3	5
IGK@	IGK@ protein	Q6P5S8_HUMAN	80Step_Domain_p160.0_to_236.0	160	236	80.0 AA STEP	76	84	65	69	88	87	79	-0.157895	0.2238	73	85	DSTYSLSSTLTLSK SGTASVVCLLNNFYPR VDNALQSGNSQESVTEQDSK VDNALQSGNSQESVTEQDSKDSTYSLSSTLTLSK VQWKVDNALQSGNSQESVTEQDSK VYACEVTHQGLSSPVTK DSTYSLSSTLTLSK SGTASVVCLLNNFYPR VDNALQSGNSQESVTEQDSK VDNALQSGNSQESVTEQDSKDSTYSLSSTLTLSK VYACEVTHQGLSSPVTK DSTYSLSSTLTLSK SGTASVVCLLNNFYPR VDNALQSGNSQESVTEQDSK	DSTYSLSSTLTLSK VDNALQSGNSQESVTEQDSK DSTYSLSSTLTLSK SGTASVVCLLNNFYPR VDNALQSGNSQESVTEQDSK DSTYSLSSTLTLSK VDNALQSGNSQESVTEQDSK	161	102	34	8	14	19
IGK@	IGK@ protein	Q6P5S8_HUMAN	100Step_Domain_p0_to_100	0	100	100.0 AA STEP	100	3	3	0	0	0	0	0.02	1	2	0	FSGSGSGTDFTLTITR LLIYGASSR FSGSGSGTDFTLTITR LLIYGASSR		5	4	0	0	0	0
IGK@	IGK@ protein	Q6P5S8_HUMAN	100Step_Domain_p100.0_to_200.0	100	200	100.0 AA STEP	100	94	96	100	100	100	100	-0.03	1	97	100	DSTYSLSSTLTLSK RTVAAPSVFIFPPSDEQLK SGTASVVCLLNNFYPR TVAAPSVFIFPPSDEQLK VDNALQSGNSQESVTEQDSK VDNALQSGNSQESVTEQDSKDSTYSLSSTLTLSK VQWKVDNALQSGNSQESVTEQDSK DSTYSLSSTLTLSK RTVAAPSVFIFPPSDEQLK SGTASVVCLLNNFYPR TVAAPSVFIFPPSDEQLK VDNALQSGNSQESVTEQDSK VDNALQSGNSQESVTEQDSKDSTYSLSSTLTLSK DSTYSLSSTLTLSK SGTASVVCLLNNFYPR TVAAPSVFIFPPSDEQLK VDNALQSGNSQESVTEQDSK	DSTYSLSSTLTLSK TVAAPSVFIFPPSDEQLK VDNALQSGNSQESVTEQDSK DSTYSLSSTLTLSK SGTASVVCLLNNFYPR TVAAPSVFIFPPSDEQLK VDNALQSGNSQESVTEQDSK DSTYSLSSTLTLSK TVAAPSVFIFPPSDEQLK VDNALQSGNSQESVTEQDSK	180	151	49	9	16	24
IGK@	IGK@ protein	Q6P5S8_HUMAN	100Step_Domain_p200.0_to_236.0	200	236	100.0 AA STEP	36	51	37	30	22	19	37	0.361111	0.0582	39	26	DSTYSLSSTLTLSK VDNALQSGNSQESVTEQDSKDSTYSLSSTLTLSK VYACEVTHQGLSSPVTK DSTYSLSSTLTLSK VDNALQSGNSQESVTEQDSKDSTYSLSSTLTLSK VYACEVTHQGLSSPVTK DSTYSLSSTLTLSK	DSTYSLSSTLTLSK DSTYSLSSTLTLSK DSTYSLSSTLTLSK	97	58	15	2	3	9
CRLF1	Cytokine receptor-like factor 1	CRLF1_HUMAN	50Step_Domain_p250.0_to_300.0	250	300	50.0 AA STEP	50	3	2	3	0	0	0	0.06	0	3	0	VEDSVDWK VGGLEDQLSVR VGGLEDQLSVR YRVEDSVDWK VEDSVDWK VGGLEDQLSVR		4	4	4	0	0	0
C4A	C4a anaphylatoxin	A0A0G2JPR0_HUMAN	50Step_Domain_p950.0_to_1000.0	950	1000	50.0 AA STEP	50	9	11	19	32	24	34	-0.34	0	13	30	EELVYELNPLDHR TLEIPGNSDPNMIPDGDFNSYVR VTASDPLDTLGSEGALSPGGVASLLR EELVYELNPLDHR EGAIHREELVYELNPLDHR TLEIPGNSDPNMIPDGDFNSYVR VTASDPLDTLGSEGALSPGGVASLLR VTASDPLDTLGSEGALSPGGVASLLR	EELVYELNPLDHR TLEIPGNSDPNMIPDGDFNSYVR VTASDPLDTLGSEGALSPGGVASLLR VTASDPLDTLGSEGALSPGGVASLLR VTASDPLDTLGSEGALSPGGVASLLR	17	12	2	5	2	5
COL3A1	Collagen alpha-1(III) chain	CO3A1_HUMAN	50Step_Domain_p1250.0_to_1300.0	1250	1300	50.0 AA STEP	50	0	2	0	4	4	4	-0.06	0	1	4	SVNGQIESLISPDGSR	SVNGQIESLISPDGSR SVNGQIESLISPDGSR SGEYWVDPNQGCK SVNGQIESLISPDGSR	0	1	0	6	5	4
COL1A1	Collagen alpha-1(I) chain	CO1A1_HUMAN	50Step_Domain_p600.0_to_650.0	600	650	50.0 AA STEP	50	12	6	12	11	19	14	-0.1	0	10	15	DGEAGAQGPPGPAGPAGER GVPGPPGAVGPAGK DGEAGAQGPPGPAGPAGER GVPGPPGAVGPAGK DGEAGAQGPPGPAGPAGER GVPGPPGAVGPAGK	DGEAGAQGPPGPAGPAGER GVPGPPGAVGPAGK DGEAGAQGPPGPAGPAGER GVPGPPGAVGPAGK DGEAGAQGPPGPAGPAGER GVPGPPGAVGPAGK	9	3	14	8	11	20
COL2A1	Collagen alpha-1(II) chain	CO2A1_HUMAN	50Step_Domain_p1050.0_to_1100.0	1050	1100	50.0 AA STEP	50	245	130	148	121	88	105	1.38	0	174	105	GEAGAQGPMGPSGPAGAR QGDRGEAGAQGPMGPSGPAGAR GEAGAQGPMGPSGPAGAR QGDRGEAGAQGPMGPSGPAGAR GEAGAQGPMGPSGPAGAR QGDRGEAGAQGPMGPSGPAGAR	GEAGAQGPMGPSGPAGAR QGDRGEAGAQGPMGPSGPAGAR GEAGAQGPMGPSGPAGAR QGDRGEAGAQGPMGPSGPAGAR GEAGAQGPMGPSGPAGAR QGDRGEAGAQGPMGPSGPAGAR	60	22	84	186	161	167
COL2A1	Collagen alpha-1(II) chain	CO2A1_HUMAN	50Step_Domain_p1100.0_to_1150.0	1100	1150	50.0 AA STEP	50	249	141	158	130	104	112	1.36	0	183	115	GEAGAQGPMGPSGPAGAR GIQGPQGPR QGDRGEAGAQGPMGPSGPAGAR GEAGAQGPMGPSGPAGAR GIQGPQGPR QGDRGEAGAQGPMGPSGPAGAR GEAGAQGPMGPSGPAGAR GFTGLQGLPGPPGPSGDQGASGPAGPSGPR GIQGPQGPR QGDRGEAGAQGPMGPSGPAGAR	GEAGAQGPMGPSGPAGAR GFTGLQGLPGPPGPSGDQGASGPAGPSGPR GIQGPQGPR QGDRGEAGAQGPMGPSGPAGAR GEAGAQGPMGPSGPAGAR GFTGLQGLPGPPGPSGDQGASGPAGPSGPR GIQGPQGPR QGDRGEAGAQGPMGPSGPAGAR GEAGAQGPMGPSGPAGAR GFTGLQGLPGPPGPSGDQGASGPAGPSGPR GIQGPQGPR QGDRGEAGAQGPMGPSGPAGAR	61	24	90	200	191	179
APOA4	Apolipoprotein A-IV	APOA4_HUMAN	50Step_Domain_p50.0_to_100.0	50	100	50.0 AA STEP	50	14	17	8	0	0	0	0.26	0	13	0	EEIGKELEELR LGEVNTYAGDLQK LKEEIGKELEELR LVPFATELHER SELTQQLNALFQDK EEIGKELEELR LGEVNTYAGDLQK LKEEIGKELEELR LVPFATELHER SELTQQLNALFQDK EEIGKELEELR LGEVNTYAGDLQK LVPFATELHER		27	19	3	0	0	0
APOA4	Apolipoprotein A-IV	APOA4_HUMAN	50Step_Domain_p200.0_to_250.0	200	250	50.0 AA STEP	50	16	11	17	0	0	0	0.3	0	15	0	IDQTVEELR IDQTVEELRR LNHQLEGLTFQMK LTPYADEFK SLAPYAQDTQEK IDQTVEELR IDQTVEELRR LNHQLEGLTFQMK LTPYADEFK SLAPYAQDTQEK IDQTVEELR IDQTVEELRR LTPYADEFK SLAPYAQDTQEK		32	13	6	0	0	0
APOA4	Apolipoprotein A-IV	APOA4_HUMAN	50Step_Domain_p250.0_to_300.0	250	300	50.0 AA STEP	50	10	11	17	0	0	0	0.26	0	13	0	GNTEGLQK ISASAEELR LAPLAEDVR SLAELGGHLDQQVEEFR ISASAEELR LAPLAEDVR SLAELGGHLDQQVEEFR ISASAEELR LAPLAEDVR SLAELGGHLDQQVEEFR		20	13	6	0	0	0
SERPINA1	Alpha-1-antitrypsin	A1AT_HUMAN	80Step_Domain_p0_to_80	0	80	80.0 AA STEP	80	1	1	2	3	5	2	-0.025	1	1	3	ITPNLAEFAFSLYR ITPNLAEFAFSLYR ITPNLAEFAFSLYR	ITPNLAEFAFSLYR ITPNLAEFAFSLYR ITPNLAEFAFSLYR	1	2	1	1	2	1
SERPINA1	Alpha-1-antitrypsin	A1AT_HUMAN	80Step_Domain_p80.0_to_160.0	80	160	80.0 AA STEP	80	20	22	35	27	7	13	0.125	1	26	16	TLNQPDSQLQLTTGNGLFLSEGLK ADTHDEILEGLNFNLTEIPEAQIHEGFQELLR LVDKFLEDVKK TLNQPDSQLQLTTGNGLFLSEGLK TLNQPDSQLQLTTGNGLFLSEGLK	TLNQPDSQLQLTTGNGLFLSEGLK TLNQPDSQLQLTTGNGLFLSEGLK TLNQPDSQLQLTTGNGLFLSEGLK	28	36	15	10	3	6
SERPINA1	Alpha-1-antitrypsin	A1AT_HUMAN	80Step_Domain_p160.0_to_240.0	160	240	80.0 AA STEP	80	142	169	132	106	131	125	0.3375	0.1998	148	121	DTEEEDFHVDQVTTVK DTVFALVNYIFFK KQINDYVEK LYHSEAFTVNFGDTEEAK LYHSEAFTVNFGDTEEAKK QINDYVEK WERPFEVK WERPFEVKDTEEEDFHVDQVTTVK DTEEEDFHVDQVTTVK DTVFALVNYIFFK ELDRDTVFALVNYIFFK LYHSEAFTVNFGDTEEAK LYHSEAFTVNFGDTEEAKK QINDYVEK WERPFEVK WERPFEVKDTEEEDFHVDQVTTVK DTEEEDFHVDQVTTVK LYHSEAFTVNFGDTEEAK LYHSEAFTVNFGDTEEAKK QINDYVEK WERPFEVKDTEEEDFHVDQVTTVK	DTEEEDFHVDQVTTVK LYHSEAFTVNFGDTEEAK QINDYVEK WERPFEVK DTEEEDFHVDQVTTVK KQINDYVEK LYHSEAFTVNFGDTEEAK QINDYVEK DTEEEDFHVDQVTTVK KQINDYVEK LYHSEAFTVNFGDTEEAK LYHSEAFTVNFGDTEEAKK QINDYVEK WERPFEVK	203	276	57	39	54	57
SERPINA1	Alpha-1-antitrypsin	A1AT_HUMAN	80Step_Domain_p240.0_to_320.0	240	320	80.0 AA STEP	80	138	84	132	117	160	105	-0.1125	1	118	127	DTEEEDFHVDQVTTVK LQHLENELTHDIITK LSITGTYDLK LSSWVLLMK SASLHLPK WERPFEVKDTEEEDFHVDQVTTVK YLGNATAIFFLPDEGK DTEEEDFHVDQVTTVK LQHLENELTHDIITK LSITGTYDLK LSSWVLLMK SASLHLPK WERPFEVKDTEEEDFHVDQVTTVK YLGNATAIFFLPDEGK DTEEEDFHVDQVTTVK LQHLENELTHDIITK LSITGTYDLK LSSWVLLMK WERPFEVKDTEEEDFHVDQVTTVK	DTEEEDFHVDQVTTVK LSITGTYDLK LSSWVLLMK YLGNATAIFFLPDEGK DTEEEDFHVDQVTTVK FLENEDRR LSITGTYDLK LSSWVLLMK SASLHLPK DTEEEDFHVDQVTTVK LSITGTYDLK LSSWVLLMK	197	137	57	43	66	48
SERPINA1	Alpha-1-antitrypsin	A1AT_HUMAN	80Step_Domain_p320.0_to_400.0	320	400	80.0 AA STEP	80	54	62	76	136	126	131	-0.8375	0	64	131	AVLTIDEK FNKPFVFLMIEQNTK GTEAAGAMFLEAIPMSIPPEVK LSITGTYDLK SVLGQLGITK VFSNGADLSGVTEEAPLK AVLTIDEK FNKPFVFLMIEQNTK GTEAAGAMFLEAIPMSIPPEVK LSITGTYDLK SVLGQLGITK VFSNGADLSGVTEEAPLK AVLTIDEK GTEAAGAMFLEAIPMSIPPEVK LSITGTYDLK SVLGQLGITK VFSNGADLSGVTEEAPLK	AVLTIDEK GTEAAGAMFLEAIPMSIPPEVK LSITGTYDLK SVLGQLGITK VFSNGADLSGVTEEAPLK AVLTIDEK GTEAAGAMFLEAIPMSIPPEVK LSITGTYDLK SVLGQLGITK VFSNGADLSGVTEEAPLK AVLTIDEK GTEAAGAMFLEAIPMSIPPEVK LSITGTYDLK SVLGQLGITK VFSNGADLSGVTEEAPLK	78	101	33	50	52	60
SERPINA1	Alpha-1-antitrypsin	A1AT_HUMAN	80Step_Domain_p400.0_to_418.0	400	418	80.0 AA STEP	18	1	1	0	0	0	0	0.0555556	1	1	0	FNKPFVFLMIEQNTK FNKPFVFLMIEQNTK		1	1	0	0	0	0
SERPINA1	Alpha-1-antitrypsin	A1AT_HUMAN	100Step_Domain_p0_to_100	0	100	100.0 AA STEP	100	1	2	2	3	5	2	-0.01	1	2	3	ITPNLAEFAFSLYR ADTHDEILEGLNFNLTEIPEAQIHEGFQELLR ITPNLAEFAFSLYR ITPNLAEFAFSLYR	ITPNLAEFAFSLYR ITPNLAEFAFSLYR ITPNLAEFAFSLYR	1	4	1	1	2	1
SERPINA1	Alpha-1-antitrypsin	A1AT_HUMAN	100Step_Domain_p100.0_to_200.0	100	200	100.0 AA STEP	100	94	138	83	60	34	68	0.51	0.002	105	54	KQINDYVEK LYHSEAFTVNFGDTEEAK LYHSEAFTVNFGDTEEAKK QINDYVEK TLNQPDSQLQLTTGNGLFLSEGLK ADTHDEILEGLNFNLTEIPEAQIHEGFQELLR ELDRDTVFALVNYIFFK LVDKFLEDVKK LYHSEAFTVNFGDTEEAK LYHSEAFTVNFGDTEEAKK QINDYVEK TLNQPDSQLQLTTGNGLFLSEGLK LYHSEAFTVNFGDTEEAK LYHSEAFTVNFGDTEEAKK QINDYVEK TLNQPDSQLQLTTGNGLFLSEGLK	LYHSEAFTVNFGDTEEAK QINDYVEK TLNQPDSQLQLTTGNGLFLSEGLK KQINDYVEK LYHSEAFTVNFGDTEEAK QINDYVEK TLNQPDSQLQLTTGNGLFLSEGLK KQINDYVEK LYHSEAFTVNFGDTEEAK LYHSEAFTVNFGDTEEAKK QINDYVEK TLNQPDSQLQLTTGNGLFLSEGLK	134	226	36	22	14	31
SERPINA1	Alpha-1-antitrypsin	A1AT_HUMAN	100Step_Domain_p200.0_to_300.0	200	300	100.0 AA STEP	100	124	77	116	79	109	77	0.18	0.843	106	88	DTEEEDFHVDQVTTVK DTVFALVNYIFFK LQHLENELTHDIITK LSSWVLLMK WERPFEVK WERPFEVKDTEEEDFHVDQVTTVK YLGNATAIFFLPDEGK DTEEEDFHVDQVTTVK DTVFALVNYIFFK ELDRDTVFALVNYIFFK LQHLENELTHDIITK LSSWVLLMK WERPFEVK WERPFEVKDTEEEDFHVDQVTTVK YLGNATAIFFLPDEGK DTEEEDFHVDQVTTVK LQHLENELTHDIITK LSSWVLLMK WERPFEVKDTEEEDFHVDQVTTVK	DTEEEDFHVDQVTTVK LSSWVLLMK WERPFEVK YLGNATAIFFLPDEGK DTEEEDFHVDQVTTVK FLENEDRR LSSWVLLMK DTEEEDFHVDQVTTVK LSSWVLLMK WERPFEVK	178	126	50	29	45	35
SERPINA1	Alpha-1-antitrypsin	A1AT_HUMAN	100Step_Domain_p300.0_to_400.0	300	400	100.0 AA STEP	100	59	62	76	136	133	131	-0.67	0	66	133	AVLTIDEK FNKPFVFLMIEQNTK GTEAAGAMFLEAIPMSIPPEVK LSITGTYDLK SASLHLPK SVLGQLGITK VFSNGADLSGVTEEAPLK AVLTIDEK FNKPFVFLMIEQNTK GTEAAGAMFLEAIPMSIPPEVK LSITGTYDLK SASLHLPK SVLGQLGITK VFSNGADLSGVTEEAPLK AVLTIDEK GTEAAGAMFLEAIPMSIPPEVK LSITGTYDLK SVLGQLGITK VFSNGADLSGVTEEAPLK	AVLTIDEK GTEAAGAMFLEAIPMSIPPEVK LSITGTYDLK SVLGQLGITK VFSNGADLSGVTEEAPLK AVLTIDEK FLENEDRR GTEAAGAMFLEAIPMSIPPEVK LSITGTYDLK SASLHLPK SVLGQLGITK VFSNGADLSGVTEEAPLK AVLTIDEK GTEAAGAMFLEAIPMSIPPEVK LSITGTYDLK SVLGQLGITK VFSNGADLSGVTEEAPLK	85	102	33	50	55	60
SERPINA1	Alpha-1-antitrypsin	A1AT_HUMAN	100Step_Domain_p400.0_to_418.0	400	418	100.0 AA STEP	18	1	1	0	0	0	0	0.0555556	1	1	0	FNKPFVFLMIEQNTK FNKPFVFLMIEQNTK		1	1	0	0	0	0
CPN2	Carboxypeptidase N subunit 2	CPN2_HUMAN	LRRNT	22	49	DOMAINS	27	0	0	0	0	0	0	0	1	0	0			0	0	0	0	0	0
CPN2	Carboxypeptidase N subunit 2	CPN2_HUMAN	LRRCT	395	447	DOMAINS	52	1	0	0	0	0	0	0	0.39	0	0	GQVVPALNEK		1	0	0	0	0	0
CPN2	Carboxypeptidase N subunit 2	CPN2_HUMAN	LRR 1	98	119	REPEAT	21	0	0	0	0	0	0	0	1	0	0			0	0	0	0	0	0
CPN2	Carboxypeptidase N subunit 2	CPN2_HUMAN	LRR 2	122	143	REPEAT	21	0	0	0	0	0	0	0	1	0	0			0	0	0	0	0	0
CPN2	Carboxypeptidase N subunit 2	CPN2_HUMAN	LRR 3	146	167	REPEAT	21	0	0	0	0	0	0	0	1	0	0			0	0	0	0	0	0
CPN2	Carboxypeptidase N subunit 2	CPN2_HUMAN	LRR 4	170	191	REPEAT	21	0	1	0	0	0	0	0	0.6144	0	0	TLNLAQNLLAQLPEELFHPLTSLQTLK		0	1	0	0	0	0
CPN2	Carboxypeptidase N subunit 2	CPN2_HUMAN	LRR 5	194	215	REPEAT	21	0	1	0	0	0	0	0	0.6144	0	0	TLNLAQNLLAQLPEELFHPLTSLQTLK		0	1	0	0	0	0
CPN2	Carboxypeptidase N subunit 2	CPN2_HUMAN	LRR 6	218	239	REPEAT	21	0	0	0	0	0	0	0	1	0	0			0	0	0	0	0	0
CPN2	Carboxypeptidase N subunit 2	CPN2_HUMAN	LRR 7	242	263	REPEAT	21	0	0	0	0	0	0	0	1	0	0			0	0	0	0	0	0
CPN2	Carboxypeptidase N subunit 2	CPN2_HUMAN	LRR 8	266	287	REPEAT	21	0	0	0	0	0	0	0	1	0	0			0	0	0	0	0	0
CPN2	Carboxypeptidase N subunit 2	CPN2_HUMAN	LRR 9	290	311	REPEAT	21	0	0	0	0	0	0	0	1	0	0			0	0	0	0	0	0
CPN2	Carboxypeptidase N subunit 2	CPN2_HUMAN	LRR 10	314	335	REPEAT	21	0	0	0	0	0	0	0	1	0	0			0	0	0	0	0	0
CPN2	Carboxypeptidase N subunit 2	CPN2_HUMAN	LRR 11	338	359	REPEAT	21	0	0	0	0	0	0	0	1	0	0			0	0	0	0	0	0
CPN2	Carboxypeptidase N subunit 2	CPN2_HUMAN	LRR 12	362	383	REPEAT	21	1	1	0	0	0	0	0.047619	0.0024	1	0	LELLSLSK LELLSLSK		1	2	0	0	0	0
APOA4	Apolipoprotein A-IV	APOA4_HUMAN	50Step_Domain_p300.0_to_350.0	300	350	50.0 AA STEP	50	13	18	17	0	0	0	0.32	0	16	0	ALVQQMEQLR LGPHAGDVEGHLSFLEK RVEPYGENFNK SLAELGGHLDQQVEEFR VEPYGENFNK ALVQQMEQLR LGPHAGDVEGHLSFLEK SLAELGGHLDQQVEEFR ALVQQMEQLR LGPHAGDVEGHLSFLEK SLAELGGHLDQQVEEFR VEPYGENFNK		26	21	6	0	0	0
IGHM	Immunoglobulin heavy constant mu	IGHM_HUMAN	50Step_Domain_p150.0_to_200.0	150	200	50.0 AA STEP	50	25	14	66	0	0	0	0.7	0	35	0	EGKQVGSGVTTDQVQAEAK ESGPTTYK QVGSGVTTDQVQAEAK VTSTLTIK QVGSGVTTDQVQAEAK VTSTLTIK QVGSGVTTDQVQAEAK		49	16	4	0	0	0
VWF	von Willebrand factor	VWF_HUMAN	50Step_Domain_p1800.0_to_1850.0	1800	1850	50.0 AA STEP	50	3	0	0	0	0	0	0.02	0	1	0	ILAGPAGDSNVVK VTVFPIGIGDR		5	0	0	0	0	0
DKFZp686I04196	Uncharacterized protein DKFZp686I04196	Q6N093_HUMAN	50Step_Domain_p250.0_to_300.0	250	300	50.0 AA STEP	50	4	5	13	0	0	0	0.14	0	7	0	GLPAPIEK VVSVLTVVHQDWLNGK GLPAPIEK VVSVLTVVHQDWLNGK GLPAPIEK VVSVLTVVHQDWLNGK		6	10	5	0	0	0
DKFZp686I04196	Uncharacterized protein DKFZp686I04196	Q6N093_HUMAN	50Step_Domain_p300.0_to_350.0	300	350	50.0 AA STEP	50	7	11	8	0	0	0	0.18	0	9	0	EPQVYTLPPSREEMTK GLPAPIEK EPQVYTLPPSREEMTK GLPAPIEK GLPAPIEK		12	21	3	0	0	0
DKFZp686I04196	Uncharacterized protein DKFZp686I04196	Q6N093_HUMAN	50Step_Domain_p350.0_to_400.0	350	400	50.0 AA STEP	50	25	21	21	0	0	0	0.44	0	22	0	TTPPMLDSDGSFFLYSK TTPPMLDSDGSFFLYSK TTPPMLDSDGSFFLYSK		41	41	8	0	0	0
PCOLCE	Procollagen C-endopeptidase enhancer 1	PCOC1_HUMAN	50Step_Domain_p400.0_to_449.0	400	449	50.0 AA STEP	49	5	3	6	20	15	19	-0.265306	0	5	18	GVSYLLMGQVEENR GVSYLLMGQVEENR GVSYLLMGQVEENR	GVSYLLMGQVEENR GVSYLLMGQVEENR GVSYLLMGQVEENR	3	1	5	24	18	31
N/A	Complement component C6	A8K8Z4_HUMAN	50Step_Domain_p250.0_to_300.0	250	300	50.0 AA STEP	50	6	3	0	0	0	0	0.06	0	3	0	VPANLENVGFEVQTAEDDLK DLTSLGHNENQQGSFSSQGGSSFSVPIFYSSK VPANLENVGFEVQTAEDDLK		11	5	0	0	0	0
N/A	Complement component C6	A8K8Z4_HUMAN	50Step_Domain_p300.0_to_350.0	300	350	50.0 AA STEP	50	3	4	6	0	0	0	0.08	0	4	0	ALNHLPLEYNSALYSR DLHLSDVFLK ALNHLPLEYNSALYSR DLHLSDVFLK DLHLSDVFLK		5	8	1	0	0	0
N/A	Complement component C6	A8K8Z4_HUMAN	50Step_Domain_p450.0_to_500.0	450	500	50.0 AA STEP	50	2	5	6	0	0	0	0.08	0	4	0	ENPAVIDFELAPIVDLVR SEYGAALAWEK TFSEWLESVK ENPAVIDFELAPIVDLVR SEYGAALAWEK TFSEWLESVK TFSEWLESVK		3	10	1	0	0	0
LTBP2	Latent-transforming growth factor beta-binding protein 2	LTBP2_HUMAN	50Step_Domain_p200.0_to_250.0	200	250	50.0 AA STEP	50	0	0	0	2	2	5	-0.06	0	0	3		SSAAGEGTLAR SSAAGEGTLAR CEEVIPDEEFDPQNSR SSAAGEGTLAR	0	0	0	2	2	6
CPN2	Carboxypeptidase N subunit 2	CPN2_HUMAN	80Step_Domain_p0_to_80	0	80	80.0 AA STEP	80	0	0	0	0	0	0	0	1	0	0			0	0	0	0	0	0
CPN2	Carboxypeptidase N subunit 2	CPN2_HUMAN	80Step_Domain_p80.0_to_160.0	80	160	80.0 AA STEP	80	0	0	0	0	0	0	0	1	0	0			0	0	0	0	0	0
CPN2	Carboxypeptidase N subunit 2	CPN2_HUMAN	80Step_Domain_p160.0_to_240.0	160	240	80.0 AA STEP	80	0	1	0	0	0	0	0	0.9646	0	0	TLNLAQNLLAQLPEELFHPLTSLQTLK		0	1	0	0	0	0
CPN2	Carboxypeptidase N subunit 2	CPN2_HUMAN	80Step_Domain_p240.0_to_320.0	240	320	80.0 AA STEP	80	0	0	0	0	0	0	0	1	0	0			0	0	0	0	0	0
CPN2	Carboxypeptidase N subunit 2	CPN2_HUMAN	80Step_Domain_p320.0_to_400.0	320	400	80.0 AA STEP	80	1	1	0	0	0	0	0.0125	0.0343	1	0	LELLSLSK LELLSLSK		1	2	0	0	0	0
CPN2	Carboxypeptidase N subunit 2	CPN2_HUMAN	80Step_Domain_p400.0_to_480.0	400	480	80.0 AA STEP	80	1	1	0	0	0	0	0.0125	0.0343	1	0	AGGSWDLAVQER GQVVPALNEK AGGSWDLAVQER		2	1	0	0	0	0
CPN2	Carboxypeptidase N subunit 2	CPN2_HUMAN	80Step_Domain_p480.0_to_545.0	480	545	80.0 AA STEP	65	0	0	0	0	0	0	0	1	0	0			0	0	0	0	0	0
CPN2	Carboxypeptidase N subunit 2	CPN2_HUMAN	100Step_Domain_p0_to_100	0	100	100.0 AA STEP	100	0	0	0	0	0	0	0	1	0	0			0	0	0	0	0	0
CPN2	Carboxypeptidase N subunit 2	CPN2_HUMAN	100Step_Domain_p100.0_to_200.0	100	200	100.0 AA STEP	100	0	1	0	0	0	0	0	1	0	0	TLNLAQNLLAQLPEELFHPLTSLQTLK		0	1	0	0	0	0
CPN2	Carboxypeptidase N subunit 2	CPN2_HUMAN	100Step_Domain_p200.0_to_300.0	200	300	100.0 AA STEP	100	0	0	0	0	0	0	0	1	0	0			0	0	0	0	0	0
CPN2	Carboxypeptidase N subunit 2	CPN2_HUMAN	100Step_Domain_p300.0_to_400.0	300	400	100.0 AA STEP	100	1	1	0	0	0	0	0.01	0.0558	1	0	LELLSLSK LELLSLSK		1	2	0	0	0	0
CPN2	Carboxypeptidase N subunit 2	CPN2_HUMAN	100Step_Domain_p400.0_to_500.0	400	500	100.0 AA STEP	100	1	1	0	0	0	0	0.01	0.0558	1	0	AGGSWDLAVQER GQVVPALNEK AGGSWDLAVQER		2	1	0	0	0	0
CPN2	Carboxypeptidase N subunit 2	CPN2_HUMAN	100Step_Domain_p500.0_to_545.0	500	545	100.0 AA STEP	45	0	0	0	0	0	0	0	1	0	0			0	0	0	0	0	0
LTBP2	Latent-transforming growth factor beta-binding protein 2	LTBP2_HUMAN	50Step_Domain_p250.0_to_300.0	250	300	50.0 AA STEP	50	0	0	0	2	2	4	-0.06	0	0	3		SSAAGEGTLAR SSAAGEGTLAR SSAAGEGTLAR	0	0	0	2	2	5
LTBP2	Latent-transforming growth factor beta-binding protein 2	LTBP2_HUMAN	50Step_Domain_p1350.0_to_1400.0	1350	1400	50.0 AA STEP	50	4	2	4	2	1	0	0.04	0	3	1	GAGGQSMSEAPTGDHAPAPTR GAGGQSMSEAPTGDHAPAPTR GAGGQSMSEAPTGDHAPAPTR	GAGGQSMSEAPTGDHAPAPTR GAGGQSMSEAPTGDHAPAPTR	2	1	7	2	1	0
LTBP2	Latent-transforming growth factor beta-binding protein 2	LTBP2_HUMAN	50Step_Domain_p1400.0_to_1450.0	1400	1450	50.0 AA STEP	50	4	2	4	2	1	0	0.04	0	3	1	GAGGQSMSEAPTGDHAPAPTR GAGGQSMSEAPTGDHAPAPTR GAGGQSMSEAPTGDHAPAPTR	GAGGQSMSEAPTGDHAPAPTR GAGGQSMSEAPTGDHAPAPTR	2	1	7	2	1	0
N/A	Myosin-reactive immunoglobulin heavy chain variable region	Q9UL89_HUMAN	80Step_Domain_p0_to_80	0	80	80.0 AA STEP	80	3	3	0	0	0	0	0.025	0.08	2	0	QAPGQGLEWMGR STSTAYMELSSLR QAPGQGLEWMGR STSTAYMELSSLR		6	2	0	0	0	0
N/A	Myosin-reactive immunoglobulin heavy chain variable region	Q9UL89_HUMAN	80Step_Domain_p80.0_to_116.0	80	116	80.0 AA STEP	36	1	2	0	0	0	0	0.0277778	0.511	1	0	STSTAYMELSSLR STSTAYMELSSLR		1	1	0	0	0	0
N/A	Myosin-reactive immunoglobulin heavy chain variable region	Q9UL89_HUMAN	100Step_Domain_p0_to_100	0	100	100.0 AA STEP	100	3	3	0	0	0	0	0.02	0.0444	2	0	QAPGQGLEWMGR STSTAYMELSSLR QAPGQGLEWMGR STSTAYMELSSLR		6	2	0	0	0	0
N/A	Myosin-reactive immunoglobulin heavy chain variable region	Q9UL89_HUMAN	100Step_Domain_p100.0_to_116.0	100	116	100.0 AA STEP	16	0	0	0	0	0	0	0	1	0	0			0	0	0	0	0	0
PRELP	Prolargin	PRELP_HUMAN	LRR 1	95	114	REPEAT	19	13	3	1	11	5	1	0	1	6	6	IHYLYLQNNFITELPVESFQNATGLR KVPVIPPR KVPVIPPR IHYLYLQNNFITELPVESFQNATGLR	KVPVIPPR KVPVIPPR KVPVIPPR	10	2	1	13	6	1
PRELP	Prolargin	PRELP_HUMAN	LRR 2	115	138	REPEAT	23	12	11	11	9	11	6	0.0869565	1	11	9	IHYLYLQNNFITELPVESFQNATGLR WINLDNNR WINLDNNR IHYLYLQNNFITELPVESFQNATGLR WINLDNNR	WINLDNNR WINLDNNR WINLDNNR	9	8	10	11	14	7
PRELP	Prolargin	PRELP_HUMAN	LRR 3	139	162	REPEAT	23	24	41	42	33	25	37	0.173913	1	36	32	LPGLVFLYMEK NQLEEVPSALPR LPGLVFLYMEK NQLEEVPSALPR LPGLVFLYMEK NQLEEVPSALPR	LPGLVFLYMEK NQLEEVPSALPR LPGLVFLYMEK NQLEEVPSALPR LPGLVFLYMEK NQLEEVPSALPR	19	31	37	39	31	43
PRELP	Prolargin	PRELP_HUMAN	LRR 4	163	183	REPEAT	20	17	24	30	27	18	31	-0.05	1	24	25	NQLEEVPSALPR LSQNHISR NQLEEVPSALPR LSQNHISR NQLEEVPSALPR	NQLEEVPSALPR NQLEEVPSALPR NQLEEVPSALPR	13	18	26	32	23	36
PRELP	Prolargin	PRELP_HUMAN	LRR 5	184	207	REPEAT	23	62	72	79	26	55	12	1.73913	0	71	31	IPPGVFSK LENLLLLDLQHNR LSDGVFKPDTFHGLK IPPGVFSK LENLLLLDLQHNR LSDGVFKPDTFHGLK LSQNHISR IPPGVFSK LENLLLLDLQHNR LSDGVFKPDTFHGLK LSQNHISR	IPPGVFSK LENLLLLDLQHNR IPPGVFSK LENLLLLDLQHNR IPPGVFSK LENLLLLDLQHNR	48	54	69	30	69	14
PRELP	Prolargin	PRELP_HUMAN	LRR 6	208	233	REPEAT	25	39	52	49	59	15	45	0.28	1	47	40	LSDGVFKPDTFHGLK NLMQLNLAHNILR LSDGVFKPDTFHGLK NLMQLNLAHNILR LSDGVFKPDTFHGLK NLMQLNLAHNILR	NLMQLNLAHNILR NLMQLNLAHNILR NLMQLNLAHNILR	30	39	43	69	19	53
PRELP	Prolargin	PRELP_HUMAN	LRR 7	234	254	REPEAT	20	48	29	28	43	66	82	-1.45	0.0048	35	64	IETIPNGYFK VPTAIHQLYLDSNK IETIPNGYFK VPTAIHQLYLDSNK IETIPNGYFK VPTAIHQLYLDSNK	IETIPNGYFK VPTAIHQLYLDSNK IETIPNGYFK VPTAIHQLYLDSNK IETIPNGYFK VPTAIHQLYLDSNK	37	22	25	50	82	96
PRELP	Prolargin	PRELP_HUMAN	LRR 8	255	278	REPEAT	23	8	8	9	8	4	7	0.0869565	1	8	6	IETIPNGYFK SFPNLAFIR IETIPNGYFK SFPNLAFIR IETIPNGYFK SFPNLAFIR	IETIPNGYFK LNYNKLTDR SFPNLAFIR IETIPNGYFK SFPNLAFIR IETIPNGYFK SFPNLAFIR	6	6	8	9	5	8
PRELP	Prolargin	PRELP_HUMAN	LRR 9	279	303	REPEAT	24	10	3	8	10	9	6	-0.0416667	1	7	8	ISSVPAINNR ISSVPAINNR ISSVPAINNR	ISSVPAINNR LNYNKLTDR ISSVPAINNR ISSVPAINNR	8	2	7	12	11	7
PRELP	Prolargin	PRELP_HUMAN	LRR 10	304	323	REPEAT	19	32	20	25	26	29	25	-0.0526316	1	26	27	ISSVPAINNR LEHLYLNNNSIEK ISSVPAINNR LEHLYLNNNSIEK ISSVPAINNR LEHLYLNNNSIEK	ISSVPAINNR LEHLYLNNNSIEK ISSVPAINNR LEHLYLNNNSIEK ISSVPAINNR LEHLYLNNNSIEK	25	15	22	30	36	29
PRELP	Prolargin	PRELP_HUMAN	LRR 11	324	362	REPEAT	38	22	30	17	16	20	19	0.131579	1	23	18	LEHLYLNNNSIEK INGTQICPNDLVAFHDFSSDLENVPHLR LEHLYLNNNSIEK LEHLYLNNNSIEK	LEHLYLNNNSIEK LEHLYLNNNSIEK LEHLYLNNNSIEK	17	23	15	19	25	22
PRELP	Prolargin	PRELP_HUMAN	LRR 12	363	382	REPEAT	19	0	0	0	0	0	0	0	1	0	0			0	0	0	0	0	0
C6	Complement component C6	CO6_HUMAN	50Step_Domain_p250.0_to_300.0	250	300	50.0 AA STEP	50	6	3	0	0	0	0	0.06	0	3	0	VPANLENVGFEVQTAEDDLK DLTSLGHNENQQGSFSSQGGSSFSVPIFYSSK VPANLENVGFEVQTAEDDLK		11	5	0	0	0	0
C6	Complement component C6	CO6_HUMAN	50Step_Domain_p300.0_to_350.0	300	350	50.0 AA STEP	50	3	4	6	0	0	0	0.08	0	4	0	ALNHLPLEYNSALYSR DLHLSDVFLK ALNHLPLEYNSALYSR DLHLSDVFLK DLHLSDVFLK		5	8	1	0	0	0
C6	Complement component C6	CO6_HUMAN	50Step_Domain_p450.0_to_500.0	450	500	50.0 AA STEP	50	2	5	6	0	0	0	0.08	0	4	0	ENPAVIDFELAPIVDLVR SEYGAALAWEK TFSEWLESVK ENPAVIDFELAPIVDLVR SEYGAALAWEK TFSEWLESVK TFSEWLESVK		3	10	1	0	0	0
APCS	Serum amyloid P-component	SAMP_HUMAN	50Step_Domain_p50.0_to_100.0	50	100	50.0 AA STEP	50	12	13	8	0	0	0	0.22	0	11	0	AYSLFSYNTQGR DNELLVYK VGEYSLYIGR AYSLFSYNTQGR DNELLVYK VGEYSLYIGR AYSLFSYNTQGR		23	10	1	0	0	0
APCS	Serum amyloid P-component	SAMP_HUMAN	50Step_Domain_p100.0_to_150.0	100	150	50.0 AA STEP	50	13	12	16	0	0	0	0.28	0	14	0	IVLGQEQDSYGGK QGYFVEAQPK IVLGQEQDSYGGK QGYFVEAQPK IVLGQEQDSYGGK		26	9	2	0	0	0
APCS	Serum amyloid P-component	SAMP_HUMAN	50Step_Domain_p150.0_to_200.0	150	200	50.0 AA STEP	50	10	8	16	0	0	0	0.22	0	11	0	IVLGQEQDSYGGK IVLGQEQDSYGGK IVLGQEQDSYGGK		19	6	2	0	0	0
HEL-S-92n	Pentaxin	V9HWP0_HUMAN	50Step_Domain_p50.0_to_100.0	50	100	50.0 AA STEP	50	12	13	8	0	0	0	0.22	0	11	0	AYSLFSYNTQGR DNELLVYK VGEYSLYIGR AYSLFSYNTQGR DNELLVYK VGEYSLYIGR AYSLFSYNTQGR		23	10	1	0	0	0
HEL-S-92n	Pentaxin	V9HWP0_HUMAN	50Step_Domain_p100.0_to_150.0	100	150	50.0 AA STEP	50	13	12	16	0	0	0	0.28	0	14	0	IVLGQEQDSYGGK QGYFVEAQPK IVLGQEQDSYGGK QGYFVEAQPK IVLGQEQDSYGGK		26	9	2	0	0	0
PRELP	Prolargin	PRELP_HUMAN	80Step_Domain_p0_to_80	0	80	80.0 AA STEP	80	0	0	0	0	0	0	0	1	0	0			0	0	0	0	0	0
PRELP	Prolargin	PRELP_HUMAN	80Step_Domain_p80.0_to_160.0	80	160	80.0 AA STEP	80	46	54	54	54	41	43	0.0625	1	51	46	IHYLYLQNNFITELPVESFQNATGLR KVPVIPPR LPGLVFLYMEK NQLEEVPSALPR WINLDNNR KVPVIPPR LPGLVFLYMEK NQLEEVPSALPR WINLDNNR IHYLYLQNNFITELPVESFQNATGLR LPGLVFLYMEK NQLEEVPSALPR WINLDNNR	KVPVIPPR LPGLVFLYMEK NQLEEVPSALPR WINLDNNR KVPVIPPR LPGLVFLYMEK NQLEEVPSALPR WINLDNNR KVPVIPPR LPGLVFLYMEK NQLEEVPSALPR WINLDNNR	36	41	47	63	51	51
PRELP	Prolargin	PRELP_HUMAN	80Step_Domain_p160.0_to_240.0	160	240	80.0 AA STEP	80	140	137	149	150	154	165	-0.175	0.364	142	156	IPPGVFSK LENLLLLDLQHNR LSDGVFKPDTFHGLK NLMQLNLAHNILR NQLEEVPSALPR VPTAIHQLYLDSNK IPPGVFSK LENLLLLDLQHNR LSDGVFKPDTFHGLK LSQNHISR NLMQLNLAHNILR NQLEEVPSALPR VPTAIHQLYLDSNK IPPGVFSK LENLLLLDLQHNR LSDGVFKPDTFHGLK LSQNHISR NLMQLNLAHNILR NQLEEVPSALPR VPTAIHQLYLDSNK	IPPGVFSK LENLLLLDLQHNR NLMQLNLAHNILR NQLEEVPSALPR VPTAIHQLYLDSNK IPPGVFSK LENLLLLDLQHNR NLMQLNLAHNILR NQLEEVPSALPR VPTAIHQLYLDSNK IPPGVFSK LENLLLLDLQHNR NLMQLNLAHNILR NQLEEVPSALPR VPTAIHQLYLDSNK	109	103	131	176	192	194
PRELP	Prolargin	PRELP_HUMAN	80Step_Domain_p240.0_to_320.0	240	320	80.0 AA STEP	80	86	56	58	72	98	109	-0.325	0.012	67	93	IETIPNGYFK ISSVPAINNR LEHLYLNNNSIEK SFPNLAFIR VPTAIHQLYLDSNK IETIPNGYFK ISSVPAINNR LEHLYLNNNSIEK SFPNLAFIR VPTAIHQLYLDSNK IETIPNGYFK ISSVPAINNR LEHLYLNNNSIEK SFPNLAFIR VPTAIHQLYLDSNK	IETIPNGYFK ISSVPAINNR LEHLYLNNNSIEK LNYNKLTDR SFPNLAFIR VPTAIHQLYLDSNK IETIPNGYFK ISSVPAINNR LEHLYLNNNSIEK SFPNLAFIR VPTAIHQLYLDSNK IETIPNGYFK ISSVPAINNR LEHLYLNNNSIEK SFPNLAFIR VPTAIHQLYLDSNK	67	42	51	84	122	128
PRELP	Prolargin	PRELP_HUMAN	80Step_Domain_p320.0_to_382.0	320	382	80.0 AA STEP	62	22	30	17	16	20	19	0.0806452	1	23	18	LEHLYLNNNSIEK INGTQICPNDLVAFHDFSSDLENVPHLR LEHLYLNNNSIEK LEHLYLNNNSIEK	LEHLYLNNNSIEK LEHLYLNNNSIEK LEHLYLNNNSIEK	17	23	15	19	25	22
PRELP	Prolargin	PRELP_HUMAN	100Step_Domain_p0_to_100	0	100	100.0 AA STEP	100	10	3	0	11	5	1	-0.02	1	4	6	KVPVIPPR KVPVIPPR	KVPVIPPR KVPVIPPR KVPVIPPR	8	2	0	13	6	1
PRELP	Prolargin	PRELP_HUMAN	100Step_Domain_p100.0_to_200.0	100	200	100.0 AA STEP	100	85	89	102	79	96	55	0.15	0.198	92	77	IHYLYLQNNFITELPVESFQNATGLR IPPGVFSK KVPVIPPR LENLLLLDLQHNR LPGLVFLYMEK NQLEEVPSALPR WINLDNNR IPPGVFSK KVPVIPPR LENLLLLDLQHNR LPGLVFLYMEK LSQNHISR NQLEEVPSALPR WINLDNNR IHYLYLQNNFITELPVESFQNATGLR IPPGVFSK LENLLLLDLQHNR LPGLVFLYMEK LSQNHISR NQLEEVPSALPR WINLDNNR	IPPGVFSK KVPVIPPR LENLLLLDLQHNR LPGLVFLYMEK NQLEEVPSALPR WINLDNNR IPPGVFSK KVPVIPPR LENLLLLDLQHNR LPGLVFLYMEK NQLEEVPSALPR WINLDNNR IPPGVFSK KVPVIPPR LENLLLLDLQHNR LPGLVFLYMEK NQLEEVPSALPR WINLDNNR	66	67	90	93	120	65
PRELP	Prolargin	PRELP_HUMAN	100Step_Domain_p200.0_to_300.0	200	300	100.0 AA STEP	100	117	113	110	120	129	131	-0.14	0.3328	113	127	IETIPNGYFK LENLLLLDLQHNR LSDGVFKPDTFHGLK NLMQLNLAHNILR SFPNLAFIR VPTAIHQLYLDSNK IETIPNGYFK LENLLLLDLQHNR LSDGVFKPDTFHGLK NLMQLNLAHNILR SFPNLAFIR VPTAIHQLYLDSNK IETIPNGYFK LENLLLLDLQHNR LSDGVFKPDTFHGLK NLMQLNLAHNILR SFPNLAFIR VPTAIHQLYLDSNK	IETIPNGYFK LENLLLLDLQHNR LNYNKLTDR NLMQLNLAHNILR SFPNLAFIR VPTAIHQLYLDSNK IETIPNGYFK LENLLLLDLQHNR NLMQLNLAHNILR SFPNLAFIR VPTAIHQLYLDSNK IETIPNGYFK LENLLLLDLQHNR NLMQLNLAHNILR SFPNLAFIR VPTAIHQLYLDSNK	91	85	97	141	161	154
PRELP	Prolargin	PRELP_HUMAN	100Step_Domain_p300.0_to_382.0	300	382	100.0 AA STEP	82	32	33	25	26	29	25	0.0365854	1	30	27	ISSVPAINNR LEHLYLNNNSIEK INGTQICPNDLVAFHDFSSDLENVPHLR ISSVPAINNR LEHLYLNNNSIEK ISSVPAINNR LEHLYLNNNSIEK	ISSVPAINNR LEHLYLNNNSIEK ISSVPAINNR LEHLYLNNNSIEK ISSVPAINNR LEHLYLNNNSIEK	25	25	22	30	36	29
LUM	Lumican	LUM_HUMAN	LRR 1	67	88	REPEAT	21	26	44	26	36	44	45	-0.47619	1	32	42	SVPMVPPGIK AFENVTDLQWLILDHNLLENSK NNQIDHIDEK SVPMVPPGIK AFENVTDLQWLILDHNLLENSK NNQIDHIDEK SVPMVPPGIK	NNQIDHIDEK SVPMVPPGIK NNQIDHIDEK SVPMVPPGIK NNQIDHIDEK SVPMVPPGIK	15	37	36	52	45	51
LUM	Lumican	LUM_HUMAN	LRR 2	91	114	REPEAT	23	0	2	1	0	0	0	0.0434783	1	1	0	AFENVTDLQWLILDHNLLENSK AFENVTDLQWLILDHNLLENSK		0	2	2	0	0	0
LUM	Lumican	LUM_HUMAN	LRR 3	117	137	REPEAT	20	0	0	0	0	0	0	0	1	0	0			0	0	0	0	0	0
LUM	Lumican	LUM_HUMAN	LRR 4	138	159	REPEAT	21	39	26	28	35	39	31	-0.190476	1	31	35	SLEDLQLTHNK SLEDLQLTHNK SLEDLQLTHNK	SLEDLQLTHNK SLEDLQLTHNK SLEDLQLTHNK	22	22	39	50	40	36
LUM	Lumican	LUM_HUMAN	LRR 5	160	181	REPEAT	21	49	34	33	18	14	16	1.09524	0.0165	39	16	EDAVSAAFK LKEDAVSAAFK EDAVSAAFK LKEDAVSAAFK EDAVSAAFK LKEDAVSAAFK	EDAVSAAFK LKEDAVSAAFK EDAVSAAFK LKEDAVSAAFK EDAVSAAFK LKEDAVSAAFK	28	28	45	26	14	18
LUM	Lumican	LUM_HUMAN	LRR 6	185	205	REPEAT	20	18	34	52	56	47	41	-0.65	0.5819	35	48	LPSGLPVSLLTLYLDNNK SLEYLDLSFNQIAR LPSGLPVSLLTLYLDNNK SLEYLDLSFNQIAR LPSGLPVSLLTLYLDNNK SLEYLDLSFNQIAR	LPSGLPVSLLTLYLDNNK SLEYLDLSFNQIAR LPSGLPVSLLTLYLDNNK SLEYLDLSFNQIAR LPSGLPVSLLTLYLDNNK SLEYLDLSFNQIAR	10	28	71	80	48	47
LUM	Lumican	LUM_HUMAN	LRR 7	206	227	REPEAT	21	37	28	58	43	25	52	0.047619	1	41	40	ISNIPDEYFK LPSGLPVSLLTLYLDNNK ISNIPDEYFK LPSGLPVSLLTLYLDNNK ISNIPDEYFK LPSGLPVSLLTLYLDNNK	ISNIPDEYFK LPSGLPVSLLTLYLDNNK ISNIPDEYFK LPSGLPVSLLTLYLDNNK ISNIPDEYFK LPSGLPVSLLTLYLDNNK	21	23	80	61	26	59
LUM	Lumican	LUM_HUMAN	LRR 8	230	253	REPEAT	23	16	7	6	7	8	4	0.173913	1	10	6	FNALQYLR FNALQYLR FNALQYLR	FNALQYLR FNALQYLR FNALQYLR	9	6	8	10	8	5
LUM	Lumican	LUM_HUMAN	LRR 9	255	276	REPEAT	21	14	30	23	16	13	34	0.047619	1	22	21	NIPTVNENLENYYLEVNQLEK NIPTVNENLENYYLEVNQLEK NIPTVNENLENYYLEVNQLEK	NIPTVNENLENYYLEVNQLEK NIPTVNENLENYYLEVNQLEK NIPTVNENLENYYLEVNQLEK	8	25	31	23	13	39
LUM	Lumican	LUM_HUMAN	LRR 10	277	296	REPEAT	19	14	30	23	16	13	34	0.0526316	1	22	21	NIPTVNENLENYYLEVNQLEK NIPTVNENLENYYLEVNQLEK NIPTVNENLENYYLEVNQLEK	NIPTVNENLENYYLEVNQLEK NIPTVNENLENYYLEVNQLEK NIPTVNENLENYYLEVNQLEK	8	25	31	23	13	39
LUM	Lumican	LUM_HUMAN	LRR 11	305	326	REPEAT	21	0	0	4	2	1	1	0	1	1	1	ISETSLPPDMYECLR	ISETSLPPDMYECLR ISETSLPPDMYECLR ISETSLPPDMYECLR	0	0	5	3	1	1
HEL-S-92n	Pentaxin	V9HWP0_HUMAN	50Step_Domain_p150.0_to_200.0	150	200	50.0 AA STEP	50	10	8	16	0	0	0	0.22	0	11	0	IVLGQEQDSYGGK IVLGQEQDSYGGK IVLGQEQDSYGGK		19	6	2	0	0	0
LBP	Lipopolysaccharide-binding protein	LBP_HUMAN	50Step_Domain_p50.0_to_100.0	50	100	50.0 AA STEP	50	5	8	12	0	0	0	0.16	0	8	0	GLQYAAQEGLLALQSELLR ITLPDFTGDLR GLQYAAQEGLLALQSELLR ITLPDFTGDLR ITLPDFTGDLR		9	11	4	0	0	0
LBP	Lipopolysaccharide-binding protein	LBP_HUMAN	50Step_Domain_p250.0_to_300.0	250	300	50.0 AA STEP	50	7	3	3	0	0	0	0.08	0	4	0	SPVTLLAAVMSLPEEHNK SPVTLLAAVMSLPEEHNK SPVTLLAAVMSLPEEHNK		13	4	1	0	0	0
SEMA3A	Semaphorin-3A	SEM3A_HUMAN	50Step_Domain_p50.0_to_100.0	50	100	50.0 AA STEP	50	2	7	2	0	0	0	0.08	0	4	0	DHIFSFDLVNIK DHIFSFDLVNIK IVWPVSYTR DHIFSFDLVNIK		2	6	4	0	0	0
SEMA3A	Semaphorin-3A	SEM3A_HUMAN	50Step_Domain_p400.0_to_450.0	400	450	50.0 AA STEP	50	2	3	4	0	0	0	0.06	0	3	0	DLPDDVITFAR VDAEDGQYDVMFIGTDVGTVLK DLPDDVITFAR TDVNYQFTQIVVDR TDVNYQFTQIVVDR VDAEDGQYDVMFIGTDVGTVLK		2	3	8	0	0	0
SEMA3A	Semaphorin-3A	SEM3A_HUMAN	50Step_Domain_p450.0_to_500.0	450	500	50.0 AA STEP	50	7	1	5	0	0	0	0.08	0	4	0	EPTAISAMELSTK QQQLYIGSTAGVAQLPLHR VDAEDGQYDVMFIGTDVGTVLK EPTAISAMELSTK EPTAISAMELSTK QQQLYIGSTAGVAQLPLHR VDAEDGQYDVMFIGTDVGTVLK		9	1	10	0	0	0
ITIH2	Inter-alpha-trypsin inhibitor heavy chain H2	ITIH2_HUMAN	50Step_Domain_p150.0_to_200.0	150	200	50.0 AA STEP	50	18	22	0	0	0	0	0.26	0	13	0	SSALDMENFR TEVNVLPGAK VQFELHYQEVK SSALDMENFR TEVNVLPGAK VQFELHYQEVK		35	11	0	0	0	0
LUM	Lumican	LUM_HUMAN	80Step_Domain_p0_to_80	0	80	80.0 AA STEP	80	26	42	25	36	44	45	-0.1375	0.4765	31	42	SVPMVPPGIK NNQIDHIDEK SVPMVPPGIK NNQIDHIDEK SVPMVPPGIK	NNQIDHIDEK SVPMVPPGIK NNQIDHIDEK SVPMVPPGIK NNQIDHIDEK SVPMVPPGIK	15	35	34	52	45	51
LUM	Lumican	LUM_HUMAN	80Step_Domain_p80.0_to_160.0	80	160	80.0 AA STEP	80	39	30	34	48	54	54	-0.225	0.0445	34	52	SLEDLQLTHNK AFENVTDLQWLILDHNLLENSK NNQIDHIDEK SLEDLQLTHNK AFENVTDLQWLILDHNLLENSK NNQIDHIDEK SLEDLQLTHNK	NNQIDHIDEK SLEDLQLTHNK NNQIDHIDEK SLEDLQLTHNK NNQIDHIDEK SLEDLQLTHNK	22	25	46	68	56	62
LUM	Lumican	LUM_HUMAN	80Step_Domain_p160.0_to_240.0	160	240	80.0 AA STEP	80	116	95	116	104	87	84	0.2125	0.05	109	92	EDAVSAAFK FNALQYLR ISNIPDEYFK LKEDAVSAAFK LPSGLPVSLLTLYLDNNK SLEYLDLSFNQIAR EDAVSAAFK FNALQYLR ISNIPDEYFK LKEDAVSAAFK LPSGLPVSLLTLYLDNNK SLEYLDLSFNQIAR EDAVSAAFK FNALQYLR ISNIPDEYFK LKEDAVSAAFK LPSGLPVSLLTLYLDNNK SLEYLDLSFNQIAR	EDAVSAAFK FNALQYLR ISNIPDEYFK LKEDAVSAAFK LPSGLPVSLLTLYLDNNK SLEYLDLSFNQIAR EDAVSAAFK FNALQYLR ISNIPDEYFK LKEDAVSAAFK LPSGLPVSLLTLYLDNNK SLEYLDLSFNQIAR EDAVSAAFK FNALQYLR ISNIPDEYFK LKEDAVSAAFK LPSGLPVSLLTLYLDNNK SLEYLDLSFNQIAR	66	79	159	149	90	96
LUM	Lumican	LUM_HUMAN	80Step_Domain_p240.0_to_320.0	240	320	80.0 AA STEP	80	26	42	34	29	36	45	-0.0375	1	34	37	ILGPLSYSK NIPTVNENLENYYLEVNQLEK ILGPLSYSK NIPTVNENLENYYLEVNQLEK ILGPLSYSK ISETSLPPDMYECLR NIPTVNENLENYYLEVNQLEK	ILGPLSYSK ISETSLPPDMYECLR NIPTVNENLENYYLEVNQLEK ILGPLSYSK ISETSLPPDMYECLR NIPTVNENLENYYLEVNQLEK ILGPLSYSK ISETSLPPDMYECLR NIPTVNENLENYYLEVNQLEK	15	35	46	42	37	52
LUM	Lumican	LUM_HUMAN	80Step_Domain_p320.0_to_338.0	320	338	80.0 AA STEP	18	0	0	7	4	2	3	-0.0555556	1	2	3	ISETSLPPDMYECLR VANEVTLN	ISETSLPPDMYECLR VANEVTLN ISETSLPPDMYECLR VANEVTLN ISETSLPPDMYECLR VANEVTLN	0	0	9	6	2	3
LUM	Lumican	LUM_HUMAN	100Step_Domain_p0_to_100	0	100	100.0 AA STEP	100	26	44	26	36	44	45	-0.1	0.9176	32	42	SVPMVPPGIK AFENVTDLQWLILDHNLLENSK NNQIDHIDEK SVPMVPPGIK AFENVTDLQWLILDHNLLENSK NNQIDHIDEK SVPMVPPGIK	NNQIDHIDEK SVPMVPPGIK NNQIDHIDEK SVPMVPPGIK NNQIDHIDEK SVPMVPPGIK	15	37	36	52	45	51
LUM	Lumican	LUM_HUMAN	100Step_Domain_p100.0_to_200.0	100	200	100.0 AA STEP	100	105	96	114	109	99	88	0.06	1	105	99	EDAVSAAFK LKEDAVSAAFK LPSGLPVSLLTLYLDNNK SLEDLQLTHNK SLEYLDLSFNQIAR AFENVTDLQWLILDHNLLENSK EDAVSAAFK LKEDAVSAAFK LPSGLPVSLLTLYLDNNK SLEDLQLTHNK SLEYLDLSFNQIAR AFENVTDLQWLILDHNLLENSK EDAVSAAFK LKEDAVSAAFK LPSGLPVSLLTLYLDNNK SLEDLQLTHNK SLEYLDLSFNQIAR	EDAVSAAFK LKEDAVSAAFK LPSGLPVSLLTLYLDNNK SLEDLQLTHNK SLEYLDLSFNQIAR EDAVSAAFK LKEDAVSAAFK LPSGLPVSLLTLYLDNNK SLEDLQLTHNK SLEYLDLSFNQIAR EDAVSAAFK LKEDAVSAAFK LPSGLPVSLLTLYLDNNK SLEDLQLTHNK SLEYLDLSFNQIAR	60	80	157	156	102	101
LUM	Lumican	LUM_HUMAN	100Step_Domain_p200.0_to_300.0	200	300	100.0 AA STEP	100	79	77	94	77	68	100	0.01	1	83	82	FNALQYLR ILGPLSYSK ISNIPDEYFK LPSGLPVSLLTLYLDNNK NIPTVNENLENYYLEVNQLEK FNALQYLR ILGPLSYSK ISNIPDEYFK LPSGLPVSLLTLYLDNNK NIPTVNENLENYYLEVNQLEK FNALQYLR ILGPLSYSK ISNIPDEYFK LPSGLPVSLLTLYLDNNK NIPTVNENLENYYLEVNQLEK	FNALQYLR ILGPLSYSK ISNIPDEYFK LPSGLPVSLLTLYLDNNK NIPTVNENLENYYLEVNQLEK FNALQYLR ILGPLSYSK ISNIPDEYFK LPSGLPVSLLTLYLDNNK NIPTVNENLENYYLEVNQLEK FNALQYLR ILGPLSYSK ISNIPDEYFK LPSGLPVSLLTLYLDNNK NIPTVNENLENYYLEVNQLEK	45	64	129	110	70	115
LUM	Lumican	LUM_HUMAN	100Step_Domain_p300.0_to_338.0	300	338	100.0 AA STEP	38	12	12	14	15	24	13	-0.105263	1	13	17	ILGPLSYSK ILGPLSYSK ILGPLSYSK ISETSLPPDMYECLR VANEVTLN	ILGPLSYSK ISETSLPPDMYECLR VANEVTLN ILGPLSYSK ISETSLPPDMYECLR VANEVTLN ILGPLSYSK ISETSLPPDMYECLR VANEVTLN	7	10	19	22	25	15
N/A	cDNA FLJ61290; highly similar to Neutral alpha-glucosidase AB	B4DJ30_HUMAN	50Step_Domain_p150.0_to_200.0	150	200	50.0 AA STEP	50	3	1	2	3	4	8	-0.06	0	2	5	DENSVELTMAEGPYK DENSVELTMAEGPYK DENSVELTMAEGPYK VPDVLVADPPIAR	VPDVLVADPPIAR DENSVELTMAEGPYK DENSVELTMAEGPYK FRIDELEPR VPDVLVADPPIAR	2	1	3	1	3	6
GANAB	Neutral alpha-glucosidase AB	GANAB_HUMAN	50Step_Domain_p100.0_to_150.0	100	150	50.0 AA STEP	50	3	1	2	3	4	8	-0.06	0	2	5	DENSVELTMAEGPYK DENSVELTMAEGPYK DENSVELTMAEGPYK VPDVLVADPPIAR	VPDVLVADPPIAR DENSVELTMAEGPYK DENSVELTMAEGPYK FRIDELEPR VPDVLVADPPIAR	2	1	3	1	3	6
HEL-S-164nA	Epididymis secretory sperm binding protein Li 164nA	V9HWJ0_HUMAN	50Step_Domain_p100.0_to_150.0	100	150	50.0 AA STEP	50	3	1	2	3	4	8	-0.06	0	2	5	DENSVELTMAEGPYK DENSVELTMAEGPYK DENSVELTMAEGPYK VPDVLVADPPIAR	VPDVLVADPPIAR DENSVELTMAEGPYK DENSVELTMAEGPYK FRIDELEPR VPDVLVADPPIAR	2	1	3	1	3	6
TGFB1	Transforming growth factor beta-1 proprotein	TGFB1_HUMAN	50Step_Domain_p50.0_to_100.0	50	100	50.0 AA STEP	50	1	1	1	0	0	0	0.02	0	1	0	VAGESAEPEPEPEADYYAK VAGESAEPEPEPEADYYAK VAGESAEPEPEPEADYYAK		2	1	2	0	0	0
TGFB1	Transforming growth factor beta-1 proprotein	TGFB1_HUMAN	50Step_Domain_p100.0_to_150.0	100	150	50.0 AA STEP	50	2	2	1	0	0	0	0.04	0	2	0	EAVPEPVLLSR VAGESAEPEPEPEADYYAK EAVPEPVLLSR VAGESAEPEPEPEADYYAK VAGESAEPEPEPEADYYAK		3	2	2	0	0	0
TGFB1	Transforming growth factor beta-1 proprotein	TGFB1_HUMAN	50Step_Domain_p150.0_to_200.0	150	200	50.0 AA STEP	50	1	1	1	0	0	0	0.02	0	1	0	EAVPEPVLLSR EAVPEPVLLSR LLAPSDSPEWLSFDVTGVVR		1	1	1	0	0	0
DSPG3	Dermatan sulfate proteoglycan 3; isoform CRA_a	A0A024RBC3_HUMAN	50Step_Domain_p150.0_to_200.0	150	200	50.0 AA STEP	50	3	5	7	0	0	0	0.1	0	5	0	IDLTSNLISEIDEDAFR IDLTSNLISEIDEDAFR NDFASLSDLK RIDLTSNLISEIDEDAFR IDLTSNLISEIDEDAFR NDFASLSDLK NDFASLSDLKR		1	4	13	0	0	0
DSPG3	Dermatan sulfate proteoglycan 3; isoform CRA_a	A0A024RBC3_HUMAN	50Step_Domain_p200.0_to_250.0	200	250	50.0 AA STEP	50	3	5	3	0	0	0	0.08	0	4	0	QLPELPTTLTFIDISNNR DMYDLHHLYLTDNNLDHIPLPLPENLR QLPELPTTLTFIDISNNR DMYDLHHLYLTDNNLDHIPLPLPENLR QLPELPTTLTFIDISNNR		1	4	5	0	0	0
DSPG3	Dermatan sulfate proteoglycan 3; isoform CRA_a	A0A024RBC3_HUMAN	50Step_Domain_p250.0_to_300.0	250	300	50.0 AA STEP	50	6	3	4	0	0	0	0.08	0	4	0	LDGNPINLSK DMYDLHHLYLTDNNLDHIPLPLPENLR LDGNPINLSK DMYDLHHLYLTDNNLDHIPLPLPENLR LDGNPINLSK		2	3	7	0	0	0
DSPG3	Dermatan sulfate proteoglycan 3; isoform CRA_a	A0A024RBC3_HUMAN	50Step_Domain_p300.0_to_322.0	300	322	50.0 AA STEP	22	6	2	3	0	0	0	0.181818	0	4	0	LDGNPINLSK LDGNPINLSK LDGNPINLSK		2	2	5	0	0	0
ANGPTL2	Angiopoietin-related protein 2	ANGL2_HUMAN	80Step_Domain_p0_to_80	0	80	80.0 AA STEP	80	1	0	1	2	2	2	-0.0125	1	1	2	EPEVLLENR EPEVLLENR VTGAICVNSKEPEVLLENR	EPEVLLENR EPEVLLENR EPEVLLENR	1	0	2	1	1	1
ANGPTL2	Angiopoietin-related protein 2	ANGL2_HUMAN	80Step_Domain_p80.0_to_160.0	80	160	80.0 AA STEP	80	7	11	11	6	4	8	0.05	0.0161	10	6	DNALELSQLENR EPEVLLENR QELELLNNELLK QIETLQQLVEVDGGIVSEVK RDNALELSQLENR DNALELSQLENR QELELLNNELLK QIETLQQLVEVDGGIVSEVK RDNALELSQLENR RQIETLQQLVEVDGGIVSEVK VTQLYMQLLHEIIR DNALELSQLENR EPEVLLENR QELELLNNELLK QIETLQQLVEVDGGIVSEVK RDNALELSQLENR RQIETLQQLVEVDGGIVSEVK VTGAICVNSKEPEVLLENR	DNALELSQLENR EPEVLLENR QELELLNNELLK DNALELSQLENR EPEVLLENR DNALELSQLENR EPEVLLENR QELELLNNELLK QIETLQQLVEVDGGIVSEVK	7	16	17	3	2	5
ANGPTL2	Angiopoietin-related protein 2	ANGL2_HUMAN	80Step_Domain_p160.0_to_240.0	160	240	80.0 AA STEP	80	5	2	5	2	2	2	0.025	0.5425	4	2	DNALELSQLENR IINQISTNEIQSDQNLK RDNALELSQLENR VYQPPTYNR DNALELSQLENR IINQISTNEIQSDQNLK RDNALELSQLENR DNALELSQLENR IINQISTNEIQSDQNLK RDNALELSQLENR	DNALELSQLENR DNALELSQLENR DNALELSQLENR	5	3	7	1	1	1
ANGPTL2	Angiopoietin-related protein 2	ANGL2_HUMAN	80Step_Domain_p240.0_to_320.0	240	320	80.0 AA STEP	80	3	1	3	4	0	2	0	1	2	2	HDPGGWTVIQR IINQISTNEIQSDQNLK IINQISTNEIQSDQNLK HDPGGWTVIQR IINQISTNEIQSDQNLK	HDPGGWTVIQR HDPGGWTVIQR	3	1	5	2	0	1
ANGPTL2	Angiopoietin-related protein 2	ANGL2_HUMAN	80Step_Domain_p320.0_to_400.0	320	400	80.0 AA STEP	80	18	15	14	18	18	17	-0.025	0.5425	16	18	HDPGGWTVIQR LDGSVNFFR LEPESEYYK LLVTMEDWSGR VFAEYASFR LDGSVNFFR LEPESEYYK LLVTMEDWSGR VFAEYASFR HDPGGWTVIQR LDGSVNFFR LEPESEYYK LLVTMEDWSGR VFAEYASFR	HDPGGWTVIQR LDGSVNFFR LEPESEYYK LLVTMEDWSGR LDGSVNFFR LEPESEYYK LLVTMEDWSGR VFAEYASFR HDPGGWTVIQR LDGSVNFFR LLVTMEDWSGR VFAEYASFR	18	21	21	9	9	10
ANGPTL2	Angiopoietin-related protein 2	ANGL2_HUMAN	80Step_Domain_p400.0_to_480.0	400	480	80.0 AA STEP	80	3	3	3	6	8	5	-0.0375	0.0343	3	6	YQDGVYWAEFR YQDGVYWAEFR YQDGVYWAEFR	YQDGVYWAEFR YQDGVYWAEFR YQDGVYWAEFR	3	4	4	3	4	3
ANGPTL2	Angiopoietin-related protein 2	ANGL2_HUMAN	80Step_Domain_p480.0_to_493.0	480	493	80.0 AA STEP	13	0	0	0	0	0	0	0	1	0	0			0	0	0	0	0	0
ANGPTL2	Angiopoietin-related protein 2	ANGL2_HUMAN	100Step_Domain_p0_to_100	0	100	100.0 AA STEP	100	2	1	3	4	2	3	-0.01	1	2	3	EPEVLLENR QELELLNNELLK QELELLNNELLK EPEVLLENR QELELLNNELLK VTGAICVNSKEPEVLLENR	EPEVLLENR QELELLNNELLK EPEVLLENR EPEVLLENR QELELLNNELLK	2	1	4	2	1	2
ANGPTL2	Angiopoietin-related protein 2	ANGL2_HUMAN	100Step_Domain_p100.0_to_200.0	100	200	100.0 AA STEP	100	5	11	9	2	2	5	0.05	0.0015	8	3	DNALELSQLENR QIETLQQLVEVDGGIVSEVK RDNALELSQLENR DNALELSQLENR QIETLQQLVEVDGGIVSEVK RDNALELSQLENR RQIETLQQLVEVDGGIVSEVK VTQLYMQLLHEIIR DNALELSQLENR QIETLQQLVEVDGGIVSEVK RDNALELSQLENR RQIETLQQLVEVDGGIVSEVK	DNALELSQLENR DNALELSQLENR DNALELSQLENR QIETLQQLVEVDGGIVSEVK	5	15	13	1	1	3
ANGPTL2	Angiopoietin-related protein 2	ANGL2_HUMAN	100Step_Domain_p200.0_to_300.0	200	300	100.0 AA STEP	100	2	1	2	0	0	0	0.02	0.904	2	0	IINQISTNEIQSDQNLK VYQPPTYNR IINQISTNEIQSDQNLK IINQISTNEIQSDQNLK		2	1	3	0	0	0
ANGPTL2	Angiopoietin-related protein 2	ANGL2_HUMAN	100Step_Domain_p300.0_to_400.0	300	400	100.0 AA STEP	100	18	15	14	18	18	17	-0.02	0.5585	16	18	HDPGGWTVIQR LDGSVNFFR LEPESEYYK LLVTMEDWSGR VFAEYASFR LDGSVNFFR LEPESEYYK LLVTMEDWSGR VFAEYASFR HDPGGWTVIQR LDGSVNFFR LEPESEYYK LLVTMEDWSGR VFAEYASFR	HDPGGWTVIQR LDGSVNFFR LEPESEYYK LLVTMEDWSGR LDGSVNFFR LEPESEYYK LLVTMEDWSGR VFAEYASFR HDPGGWTVIQR LDGSVNFFR LLVTMEDWSGR VFAEYASFR	18	21	21	9	9	10
ANGPTL2	Angiopoietin-related protein 2	ANGL2_HUMAN	100Step_Domain_p400.0_to_493.0	400	493	100.0 AA STEP	93	3	3	3	6	8	5	-0.0322581	0.0585	3	6	YQDGVYWAEFR YQDGVYWAEFR YQDGVYWAEFR	YQDGVYWAEFR YQDGVYWAEFR YQDGVYWAEFR	3	4	4	3	4	3
AEBP1	Adipocyte enhancer-binding protein 1	AEBP1_HUMAN	Interaction with MAPK1 and MAPK3	421	624	REGIONS	203	19	21	23	23	25	25	-0.0147783	0.0924	21	24	DTPVLSELPEPVVAR FTGVITQGR IYAMEISDNPGEHELGEPEFR LNMQTGATEDDYYDGAWCAEDDAR YTAGIHGNEVLGR DTPVLSELPEPVVAR FTGVITQGR IYAMEISDNPGEHELGEPEFR TQWIEVDTR YTAGIHGNEVLGR DTPVLSELPEPVVAR FTGVITQGR IYAMEISDNPGEHELGEPEFR IYPLTWNGSLCMR LEVLGCSVAPVYSYYAQNEVVATDDLDFR LNMQTGATEDDYYDGAWCAEDDAR TQWIEVDTR TQWIEVDTRR YTAGIHGNEVLGR	DTPVLSELPEPVVAR FTGVITQGR IYAMEISDNPGEHELGEPEFR TQWIEVDTR YTAGIHGNEVLGR DTPVLSELPEPVVAR FTGVITQGR IYAMEISDNPGEHELGEPEFR TQWIEVDTR YTAGIHGNEVLGR DTPVLSELPEPVVAR IYAMEISDNPGEHELGEPEFR LNMQTGATEDDYYDGAWCAEDDAR TQWIEVDTR YTAGIHGNEVLGR	15	20	34	12	15	26
AEBP1	Adipocyte enhancer-binding protein 1	AEBP1_HUMAN	Required for transcriptional repression	941	1158	REGIONS	217	0	1	3	4	8	5	-0.0230415	0.031	1	6	ILNPGEYR ILNPGEYR	ILNPGEYR ILNPGEYR TASGGDYWR VTAHAEGYTPSAK ILNPGEYR	0	1	4	2	5	5
EPYC	Epiphycan	EPYC_HUMAN	50Step_Domain_p150.0_to_200.0	150	200	50.0 AA STEP	50	3	5	7	0	0	0	0.1	0	5	0	IDLTSNLISEIDEDAFR IDLTSNLISEIDEDAFR NDFASLSDLK RIDLTSNLISEIDEDAFR IDLTSNLISEIDEDAFR NDFASLSDLK NDFASLSDLKR		1	4	13	0	0	0
EPYC	Epiphycan	EPYC_HUMAN	50Step_Domain_p200.0_to_250.0	200	250	50.0 AA STEP	50	3	5	3	0	0	0	0.08	0	4	0	QLPELPTTLTFIDISNNR DMYDLHHLYLTDNNLDHIPLPLPENLR QLPELPTTLTFIDISNNR DMYDLHHLYLTDNNLDHIPLPLPENLR QLPELPTTLTFIDISNNR		1	4	5	0	0	0
EPYC	Epiphycan	EPYC_HUMAN	50Step_Domain_p250.0_to_300.0	250	300	50.0 AA STEP	50	6	3	4	0	0	0	0.08	0	4	0	LDGNPINLSK DMYDLHHLYLTDNNLDHIPLPLPENLR LDGNPINLSK DMYDLHHLYLTDNNLDHIPLPLPENLR LDGNPINLSK		2	3	7	0	0	0
EPYC	Epiphycan	EPYC_HUMAN	50Step_Domain_p300.0_to_322.0	300	322	50.0 AA STEP	22	6	2	3	0	0	0	0.181818	0	4	0	LDGNPINLSK LDGNPINLSK LDGNPINLSK		2	2	5	0	0	0
ITIH1	Inter-alpha-trypsin inhibitor heavy chain H1	ITIH1_HUMAN	50Step_Domain_p50.0_to_100.0	50	100	50.0 AA STEP	50	16	13	0	0	0	0	0.2	0	10	0	EVAFDLEIPK FAHYVVTSQVVNTANEAR QAVDTAVDGVFIR TAFISDFAVTADGNAFIGDIK EVAFDLEIPK FAHYVVTSQVVNTANEAR QAVDTAVDGVFIR TAFISDFAVTADGNAFIGDIK		31	14	0	0	0	0
A1BG	Alpha-1B-glycoprotein	A1BG_HUMAN	50Step_Domain_p50.0_to_100.0	50	100	50.0 AA STEP	50	7	4	3	0	0	0	0.1	0	5	0	HQFLLTGDTQGR NGVAQEPVHLDSPAIK SGLSTGWTQLSK HQFLLTGDTQGR SGLSTGWTQLSK HQFLLTGDTQGR		13	6	1	0	0	0
A1BG	Alpha-1B-glycoprotein	A1BG_HUMAN	50Step_Domain_p100.0_to_150.0	100	150	50.0 AA STEP	50	4	4	6	0	0	0	0.1	0	5	0	LLELTGPK SGLSTGWTQLSK LLELTGPK SGLSTGWTQLSK SLPAPWLSMAPVSWITPGLK LLELTGPK		8	7	2	0	0	0
A1BG	Alpha-1B-glycoprotein	A1BG_HUMAN	50Step_Domain_p450.0_to_495.0	450	495	50.0 AA STEP	45	2	5	3	0	0	0	0.0666667	0	3	0	TPGAAANLELIFVGPQHAGNYR SWVPHTFESELSDPVELLVAES TPGAAANLELIFVGPQHAGNYR SWVPHTFESELSDPVELLVAES		3	8	1	0	0	0
HEL-S-163pA	Epididymis secretory sperm binding protein Li 163pA	V9HWD8_HUMAN	50Step_Domain_p50.0_to_100.0	50	100	50.0 AA STEP	50	7	4	3	0	0	0	0.1	0	5	0	HQFLLTGDTQGR NGVAQEPVHLDSPAIK SGLSTGWTQLSK HQFLLTGDTQGR SGLSTGWTQLSK HQFLLTGDTQGR		13	6	1	0	0	0
HEL-S-163pA	Epididymis secretory sperm binding protein Li 163pA	V9HWD8_HUMAN	50Step_Domain_p100.0_to_150.0	100	150	50.0 AA STEP	50	4	4	6	0	0	0	0.1	0	5	0	LLELTGPK SGLSTGWTQLSK LLELTGPK SGLSTGWTQLSK SLPAPWLSMAPVSWITPGLK LLELTGPK		8	7	2	0	0	0
HEL-S-163pA	Epididymis secretory sperm binding protein Li 163pA	V9HWD8_HUMAN	50Step_Domain_p450.0_to_495.0	450	495	50.0 AA STEP	45	2	5	3	0	0	0	0.0666667	0	3	0	TPGAAANLELIFVGPQHAGNYR SWVPHTFESELSDPVELLVAES TPGAAANLELIFVGPQHAGNYR SWVPHTFESELSDPVELLVAES		3	8	1	0	0	0
CILP	Cartilage intermediate layer protein 1	CILP1_HUMAN	50Step_Domain_p300.0_to_350.0	300	350	50.0 AA STEP	50	46	37	36	9	10	21	0.54	0	40	13	AETPYMVMNPETK AETPYMVMNPETK AETPYMVMNPETK	AETPYMVMNPETK AETPYMVMNPETK AETPYMVMNPETK	39	33	35	10	11	22
CILP	Cartilage intermediate layer protein 1	CILP1_HUMAN	50Step_Domain_p750.0_to_800.0	750	800	50.0 AA STEP	50	38	23	22	65	69	49	-0.66	0	28	61	FLPSEQIQGVVISVINLEPR FLPSEQIQGVVISVINLEPR TGFLSNPR FLPSEQIQGVVISVINLEPR TGFLSNPR	FDSVITGPNGACVPAFCDDQSPDAYSAYVLASLAGEELQAVESSPK FLPSEQIQGVVISVINLEPR TGFLSNPR FDSVITGPNGACVPAFCDDQSPDAYSAYVLASLAGEELQAVESSPK FLPSEQIQGVVISVINLEPR TGFLSNPR FLPSEQIQGVVISVINLEPR TGFLSNPR	32	20	22	75	77	51
C3	Complement C3	CO3_HUMAN	50Step_Domain_p350.0_to_400.0	350	400	50.0 AA STEP	50	14	16	20	0	114	101	-1.1	0	17	72	SGIPIVTSPYQIHFTK VPVAVQGEDTVQSLTQGDGVAK SGIPIVTSPYQIHFTK VPVAVQGEDTVQSLTQGDGVAK YFKPGMPFDLMVFVTNPDGSPAYR SGIPIVTSPYQIHFTK VPVAVQGEDTVQSLTQGDGVAK	VPVAVQGEDTVQSLTQGDGVAK VPVAVQGEDTVQSLTQGDGVAK	27	25	5	0	5	2
C3	Complement C3	CO3_HUMAN	50Step_Domain_p400.0_to_450.0	400	450	50.0 AA STEP	50	20	15	16	42	137	101	-1.52	0	17	93	KQELSEAEQATR QELSEAEQATR TMQALPYSTVGNSNNYLHLSVLR VPVAVQGEDTVQSLTQGDGVAK QELSEAEQATR TMQALPYSTVGNSNNYLHLSVLR VPVAVQGEDTVQSLTQGDGVAK VPVAVQGEDTVQSLTQGDGVAK	QELSEAEQATR QELSEAEQATR VPVAVQGEDTVQSLTQGDGVAK VPVAVQGEDTVQSLTQGDGVAK	39	24	4	1	6	2
HEL-S-62p	C3-beta-c	V9HWA9_HUMAN	50Step_Domain_p350.0_to_400.0	350	400	50.0 AA STEP	50	14	16	20	0	114	101	-1.1	0	17	72	SGIPIVTSPYQIHFTK VPVAVQGEDTVQSLTQGDGVAK SGIPIVTSPYQIHFTK VPVAVQGEDTVQSLTQGDGVAK YFKPGMPFDLMVFVTNPDGSPAYR SGIPIVTSPYQIHFTK VPVAVQGEDTVQSLTQGDGVAK	VPVAVQGEDTVQSLTQGDGVAK VPVAVQGEDTVQSLTQGDGVAK	27	25	5	0	5	2
HEL-S-62p	C3-beta-c	V9HWA9_HUMAN	50Step_Domain_p400.0_to_450.0	400	450	50.0 AA STEP	50	20	15	16	42	137	101	-1.52	0	17	93	KQELSEAEQATR QELSEAEQATR TMQALPYSTVGNSNNYLHLSVLR VPVAVQGEDTVQSLTQGDGVAK QELSEAEQATR TMQALPYSTVGNSNNYLHLSVLR VPVAVQGEDTVQSLTQGDGVAK VPVAVQGEDTVQSLTQGDGVAK	QELSEAEQATR QELSEAEQATR VPVAVQGEDTVQSLTQGDGVAK VPVAVQGEDTVQSLTQGDGVAK	39	24	4	1	6	2
CILP2	Cartilage intermediate layer protein 2	K7EPJ4_HUMAN	50Step_Domain_p600.0_to_650.0	600	650	50.0 AA STEP	50	23	21	12	2	1	9	0.3	0	19	4	ADGKPYSGPVEAR DLTSAASAPSDLR FVDSDGELAPLR TYGMFSVDLR ADGKPYSGPVEAR DLTSAASAPSDLR FVDSDGELAPLR TYGMFSVDLR DLTSAASAPSDLR FVDSDGELAPLR TYGMFSVDLR	DLTSAASAPSDLR FVDSDGELAPLR FVDSDGELAPLR DLTSAASAPSDLR FVDSDGELAPLR	14	22	14	3	2	10
CILP2	Cartilage intermediate layer protein 2	K7EPJ4_HUMAN	50Step_Domain_p750.0_to_800.0	750	800	50.0 AA STEP	50	2	8	9	30	31	9	-0.34	0	6	23	FTPSEQVEGVVVTLVNLEPAPGFSANPR FTPSEQVEGVVVTLVNLEPAPGFSANPR FTPSEQVEGVVVTLVNLEPAPGFSANPR	FTPSEQVEGVVVTLVNLEPAPGFSANPR FTPSEQVEGVVVTLVNLEPAPGFSANPR FTPSEQVEGVVVTLVNLEPAPGFSANPR	1	8	10	40	43	10
CILP2	Cartilage intermediate layer protein 2	K7EPJ4_HUMAN	50Step_Domain_p900.0_to_950.0	900	950	50.0 AA STEP	50	7	10	10	36	21	14	-0.3	0	9	24	EGTPASWTGDLLAWWPNPQEFR VEADKYEYNVVPFR YEYNVVPFR EGTPASWTGDLLAWWPNPQEFR VEADKYEYNVVPFR YEYNVVPFR ECQGAPVTASHFR EGTPASWTGDLLAWWPNPQEFR VEADKYEYNVVPFR YEYNVVPFR	EGTPASWTGDLLAWWPNPQEFR VEADKYEYNVVPFR YEYNVVPFR ECQGAPVTASHFR EGTPASWTGDLLAWWPNPQEFR YEYNVVPFR EGTPASWTGDLLAWWPNPQEFR VEADKYEYNVVPFR YEYNVVPFR	4	10	11	48	29	15
C7	Complement component C7	CO7_HUMAN	50Step_Domain_p250.0_to_300.0	250	300	50.0 AA STEP	50	7	7	0	0	0	0	0.1	0	5	0	ELSHLPSLYDYSAYR LIDQYGTHYLQSGSLGGEYR ELSHLPSLYDYSAYR LIDQYGTHYLQSGSLGGEYR		13	13	0	0	0	0
POSTN	Periostin	POSTN_HUMAN	50Step_Domain_p750.0_to_800.0	750	800	50.0 AA STEP	50	3	1	5	0	0	0	0.06	0	3	0	FIEGGDGHLFEDEEIK ISTGGGETEETLKK LLQEEVTK ISTGGGETEETLK ISTGGGETEETLK LLQEEVTK		5	1	2	0	0	0
DNAJC3	DnaJ homolog subfamily C member 3	DNJC3_HUMAN	50Step_Domain_p200.0_to_250.0	200	250	50.0 AA STEP	50	3	5	3	0	0	0	0.08	0	4	0	ISTLYYQLGDHELSLSEVR ISTLYYQLGDHELSLSEVR ISTLYYQLGDHELSLSEVR		1	6	5	0	0	0
HEL-214	Epididymis luminal protein 214	V9HW68_HUMAN	50Step_Domain_p50.0_to_100.0	50	100	50.0 AA STEP	50	3	3	0	0	0	0	0.04	0	2	0	GLEWVANIK NSLYLQMNSLR GLEWVANIK NSLYLQMNSLR		3	5	0	0	0	0
AEBP1	Adipocyte enhancer-binding protein 1	AEBP1_HUMAN	80Step_Domain_p0_to_80	0	80	80.0 AA STEP	80	0	0	0	0	5	0	-0.025	1	0	2		EDDVEAPPPPEPTPR RPGTAAEVPPEK	0	0	0	0	3	0
AEBP1	Adipocyte enhancer-binding protein 1	AEBP1_HUMAN	80Step_Domain_p80.0_to_160.0	80	160	80.0 AA STEP	80	0	1	0	0	5	1	-0.025	1	0	2	ESLEGSPRPPK	ESLEGSPRPPK RPGTAAEVPPEK ESLEGSPRPPK	0	1	0	0	3	1
AEBP1	Adipocyte enhancer-binding protein 1	AEBP1_HUMAN	80Step_Domain_p160.0_to_240.0	160	240	80.0 AA STEP	80	0	0	0	0	0	0	0	1	0	0			0	0	0	0	0	0
AEBP1	Adipocyte enhancer-binding protein 1	AEBP1_HUMAN	80Step_Domain_p240.0_to_320.0	240	320	80.0 AA STEP	80	0	0	1	4	2	2	-0.0375	1	0	3	VWPEPPEEK	APAPAPEER EDYEDFEYIR APAPAPEER EDYEDFEYIR	0	0	1	2	1	2
AEBP1	Adipocyte enhancer-binding protein 1	AEBP1_HUMAN	80Step_Domain_p320.0_to_400.0	320	400	80.0 AA STEP	80	4	3	3	4	5	8	-0.0375	1	3	6	GEELEEEWTPTEK KGEELEEEWTPTEK GEELEEEWTPTEK KGEELEEEWTPTEK GEELEEEWTPTEK KGEELEEEWTPTEK	GEELEEEWTPTEK KGEELEEEWTPTEK GEELEEEWTPTEK KGEELEEEWTPTEK KEDSSPKEETDK KGEELEEEWTPTEK	3	3	4	2	3	8
AEBP1	Adipocyte enhancer-binding protein 1	AEBP1_HUMAN	80Step_Domain_p400.0_to_480.0	400	480	80.0 AA STEP	80	5	4	6	4	5	8	-0.0125	1	5	6	FTGVITQGR LNMQTGATEDDYYDGAWCAEDDAR FTGVITQGR TQWIEVDTR FTGVITQGR LNMQTGATEDDYYDGAWCAEDDAR TQWIEVDTR TQWIEVDTRR	FTGVITQGR TQWIEVDTR FTGVITQGR TQWIEVDTR LNMQTGATEDDYYDGAWCAEDDAR TQWIEVDTR	4	4	9	2	3	8
AEBP1	Adipocyte enhancer-binding protein 1	AEBP1_HUMAN	80Step_Domain_p480.0_to_560.0	480	560	80.0 AA STEP	80	4	4	6	6	5	6	-0.0125	1	5	6	DTPVLSELPEPVVAR DTPVLSELPEPVVAR DTPVLSELPEPVVAR IYPLTWNGSLCMR LEVLGCSVAPVYSYYAQNEVVATDDLDFR	DTPVLSELPEPVVAR DTPVLSELPEPVVAR DTPVLSELPEPVVAR	3	4	9	3	3	6
AEBP1	Adipocyte enhancer-binding protein 1	AEBP1_HUMAN	80Step_Domain_p560.0_to_640.0	560	640	80.0 AA STEP	80	10	12	12	13	15	11	-0.025	1	11	13	IYAMEISDNPGEHELGEPEFR YTAGIHGNEVLGR IYAMEISDNPGEHELGEPEFR YTAGIHGNEVLGR IYAMEISDNPGEHELGEPEFR LEVLGCSVAPVYSYYAQNEVVATDDLDFR YTAGIHGNEVLGR	IYAMEISDNPGEHELGEPEFR YTAGIHGNEVLGR IYAMEISDNPGEHELGEPEFR YTAGIHGNEVLGR IYAMEISDNPGEHELGEPEFR YTAGIHGNEVLGR	8	12	17	7	9	12
AEBP1	Adipocyte enhancer-binding protein 1	AEBP1_HUMAN	80Step_Domain_p640.0_to_720.0	640	720	80.0 AA STEP	80	0	0	0	0	0	0	0	1	0	0			0	0	0	0	0	0
AEBP1	Adipocyte enhancer-binding protein 1	AEBP1_HUMAN	80Step_Domain_p720.0_to_800.0	720	800	80.0 AA STEP	80	53	47	42	40	31	35	0.15	0	47	35	AIIAWMEK GEDEDEVSEAQETPDHAIFR LVSYPYDMAR NPFVLGANLNGGER TPTQEQLLAAAMAAAR VPNNNLPIPER YLSPDATVSTEVR AIIAWMEK GEDEDEVSEAQETPDHAIFR LVSYPYDMAR TPTQEQLLAAAMAAAR TPTQEQLLAAAMAAARGEDEDEVSEAQETPDHAIFR VPNNNLPIPER YLSPDATVSTEVR AIIAWMEK GEDEDEVSEAQETPDHAIFR LVSYPYDMAR NPFVLGANLNGGER TPTQEQLLAAAMAAAR VPNNNLPIPER YLSPDATVSTEVR	AIIAWMEK GEDEDEVSEAQETPDHAIFR LVSYPYDMAR NPFVLGANLNGGER TPTQEQLLAAAMAAAR VPNNNLPIPER YLSPDATVSTEVR AIIAWMEK GEDEDEVSEAQETPDHAIFR LVSYPYDMAR NPFVLGANLNGGER TPTQEQLLAAAMAAAR VPNNNLPIPER YLSPDATVSTEVR AIIAWMEK GEDEDEVSEAQETPDHAIFR LVSYPYDMAR NPFVLGANLNGGER TPTQEQLLAAAMAAAR VPNNNLPIPER YLSPDATVSTEVR	41	46	62	21	18	37
AEBP1	Adipocyte enhancer-binding protein 1	AEBP1_HUMAN	80Step_Domain_p800.0_to_880.0	800	880	80.0 AA STEP	80	23	22	24	23	8	26	0.05	0.9075	23	19	FPHESELPR GEDEDEVSEAQETPDHAIFR FPHESELPR GEDEDEVSEAQETPDHAIFR TPTQEQLLAAAMAAARGEDEDEVSEAQETPDHAIFR FPHESELPR GEDEDEVSEAQETPDHAIFR	FPHESELPR GEDEDEVSEAQETPDHAIFR GEDEDEVSEAQETPDHAIFR FPHESELPR GEDEDEVSEAQETPDHAIFR	18	21	35	12	5	27
AEBP1	Adipocyte enhancer-binding protein 1	AEBP1_HUMAN	80Step_Domain_p880.0_to_960.0	880	960	80.0 AA STEP	80	5	9	13	11	12	11	-0.025	1	9	11	EALLTFMEQVHR FPHESELPR EALLTFMEQVHR FPHESELPR ILNPGEYR EALLTFMEQVHR FPHESELPR ILNPGEYR	FPHESELPR ILNPGEYR EALLTFMEQVHR ILNPGEYR TASGGDYWR VTAHAEGYTPSAK FPHESELPR ILNPGEYR	4	9	19	6	7	12
AEBP1	Adipocyte enhancer-binding protein 1	AEBP1_HUMAN	80Step_Domain_p960.0_to_1040.0	960	1040	80.0 AA STEP	80	0	0	0	0	2	0	-0.0125	1	0	1		VTAHAEGYTPSAK	0	0	0	0	1	0
AEBP1	Adipocyte enhancer-binding protein 1	AEBP1_HUMAN	80Step_Domain_p1040.0_to_1120.0	1040	1120	80.0 AA STEP	80	0	0	0	0	0	0	0	1	0	0			0	0	0	0	0	0
AEBP1	Adipocyte enhancer-binding protein 1	AEBP1_HUMAN	80Step_Domain_p1120.0_to_1158.0	1120	1158	80.0 AA STEP	38	0	0	0	0	0	0	0	1	0	0			0	0	0	0	0	0
AEBP1	Adipocyte enhancer-binding protein 1	AEBP1_HUMAN	100Step_Domain_p0_to_100	0	100	100.0 AA STEP	100	0	0	0	0	5	0	-0.02	1	0	2		EDDVEAPPPPEPTPR RPGTAAEVPPEK	0	0	0	0	3	0
AEBP1	Adipocyte enhancer-binding protein 1	AEBP1_HUMAN	100Step_Domain_p100.0_to_200.0	100	200	100.0 AA STEP	100	0	1	0	0	2	1	-0.01	1	0	1	ESLEGSPRPPK	ESLEGSPRPPK ESLEGSPRPPK	0	1	0	0	1	1
AEBP1	Adipocyte enhancer-binding protein 1	AEBP1_HUMAN	100Step_Domain_p200.0_to_300.0	200	300	100.0 AA STEP	100	0	0	1	4	2	2	-0.03	1	0	3	VWPEPPEEK	APAPAPEER EDYEDFEYIR APAPAPEER EDYEDFEYIR	0	0	1	2	1	2
AEBP1	Adipocyte enhancer-binding protein 1	AEBP1_HUMAN	100Step_Domain_p300.0_to_400.0	300	400	100.0 AA STEP	100	4	3	3	4	5	8	-0.03	1	3	6	GEELEEEWTPTEK KGEELEEEWTPTEK GEELEEEWTPTEK KGEELEEEWTPTEK GEELEEEWTPTEK KGEELEEEWTPTEK	GEELEEEWTPTEK KGEELEEEWTPTEK GEELEEEWTPTEK KGEELEEEWTPTEK KEDSSPKEETDK KGEELEEEWTPTEK	3	3	4	2	3	8
AEBP1	Adipocyte enhancer-binding protein 1	AEBP1_HUMAN	100Step_Domain_p400.0_to_500.0	400	500	100.0 AA STEP	100	5	4	6	4	5	8	-0.01	1	5	6	FTGVITQGR LNMQTGATEDDYYDGAWCAEDDAR FTGVITQGR TQWIEVDTR FTGVITQGR LNMQTGATEDDYYDGAWCAEDDAR TQWIEVDTR TQWIEVDTRR	FTGVITQGR TQWIEVDTR FTGVITQGR TQWIEVDTR LNMQTGATEDDYYDGAWCAEDDAR TQWIEVDTR	4	4	9	2	3	8
AEBP1	Adipocyte enhancer-binding protein 1	AEBP1_HUMAN	100Step_Domain_p500.0_to_600.0	500	600	100.0 AA STEP	100	10	12	12	15	15	14	-0.04	1	11	15	DTPVLSELPEPVVAR IYAMEISDNPGEHELGEPEFR DTPVLSELPEPVVAR IYAMEISDNPGEHELGEPEFR DTPVLSELPEPVVAR IYAMEISDNPGEHELGEPEFR IYPLTWNGSLCMR LEVLGCSVAPVYSYYAQNEVVATDDLDFR	DTPVLSELPEPVVAR IYAMEISDNPGEHELGEPEFR DTPVLSELPEPVVAR IYAMEISDNPGEHELGEPEFR DTPVLSELPEPVVAR IYAMEISDNPGEHELGEPEFR	8	12	18	8	9	15
AEBP1	Adipocyte enhancer-binding protein 1	AEBP1_HUMAN	100Step_Domain_p600.0_to_700.0	600	700	100.0 AA STEP	100	10	12	11	13	15	11	-0.02	1	11	13	IYAMEISDNPGEHELGEPEFR YTAGIHGNEVLGR IYAMEISDNPGEHELGEPEFR YTAGIHGNEVLGR IYAMEISDNPGEHELGEPEFR YTAGIHGNEVLGR	IYAMEISDNPGEHELGEPEFR YTAGIHGNEVLGR IYAMEISDNPGEHELGEPEFR YTAGIHGNEVLGR IYAMEISDNPGEHELGEPEFR YTAGIHGNEVLGR	8	12	16	7	9	12
AEBP1	Adipocyte enhancer-binding protein 1	AEBP1_HUMAN	100Step_Domain_p700.0_to_800.0	700	800	100.0 AA STEP	100	53	47	42	40	31	35	0.12	0	47	35	AIIAWMEK GEDEDEVSEAQETPDHAIFR LVSYPYDMAR NPFVLGANLNGGER TPTQEQLLAAAMAAAR VPNNNLPIPER YLSPDATVSTEVR AIIAWMEK GEDEDEVSEAQETPDHAIFR LVSYPYDMAR TPTQEQLLAAAMAAAR TPTQEQLLAAAMAAARGEDEDEVSEAQETPDHAIFR VPNNNLPIPER YLSPDATVSTEVR AIIAWMEK GEDEDEVSEAQETPDHAIFR LVSYPYDMAR NPFVLGANLNGGER TPTQEQLLAAAMAAAR VPNNNLPIPER YLSPDATVSTEVR	AIIAWMEK GEDEDEVSEAQETPDHAIFR LVSYPYDMAR NPFVLGANLNGGER TPTQEQLLAAAMAAAR VPNNNLPIPER YLSPDATVSTEVR AIIAWMEK GEDEDEVSEAQETPDHAIFR LVSYPYDMAR NPFVLGANLNGGER TPTQEQLLAAAMAAAR VPNNNLPIPER YLSPDATVSTEVR AIIAWMEK GEDEDEVSEAQETPDHAIFR LVSYPYDMAR NPFVLGANLNGGER TPTQEQLLAAAMAAAR VPNNNLPIPER YLSPDATVSTEVR	41	46	62	21	18	37
AEBP1	Adipocyte enhancer-binding protein 1	AEBP1_HUMAN	100Step_Domain_p800.0_to_900.0	800	900	100.0 AA STEP	100	26	28	30	23	12	26	0.08	0.0096	28	20	EALLTFMEQVHR FPHESELPR GEDEDEVSEAQETPDHAIFR EALLTFMEQVHR FPHESELPR GEDEDEVSEAQETPDHAIFR TPTQEQLLAAAMAAARGEDEDEVSEAQETPDHAIFR EALLTFMEQVHR FPHESELPR GEDEDEVSEAQETPDHAIFR	FPHESELPR GEDEDEVSEAQETPDHAIFR EALLTFMEQVHR GEDEDEVSEAQETPDHAIFR FPHESELPR GEDEDEVSEAQETPDHAIFR	20	27	44	12	7	27
AEBP1	Adipocyte enhancer-binding protein 1	AEBP1_HUMAN	100Step_Domain_p900.0_to_1000.0	900	1000	100.0 AA STEP	100	3	7	9	4	12	5	-0.01	1	6	7	EALLTFMEQVHR EALLTFMEQVHR ILNPGEYR EALLTFMEQVHR ILNPGEYR	ILNPGEYR EALLTFMEQVHR ILNPGEYR TASGGDYWR VTAHAEGYTPSAK ILNPGEYR	2	7	13	2	7	5
AEBP1	Adipocyte enhancer-binding protein 1	AEBP1_HUMAN	100Step_Domain_p1000.0_to_1100.0	1000	1100	100.0 AA STEP	100	0	0	0	0	0	0	0	1	0	0			0	0	0	0	0	0
AEBP1	Adipocyte enhancer-binding protein 1	AEBP1_HUMAN	100Step_Domain_p1100.0_to_1158.0	1100	1158	100.0 AA STEP	58	0	0	0	0	0	0	0	1	0	0			0	0	0	0	0	0
FBN1	Fibrillin-1	FBN1_HUMAN	50Step_Domain_p1500.0_to_1550.0	1500	1550	50.0 AA STEP	50	3	2	3	5	4	3	-0.02	0	3	4	GDNGDTACSNEIGVGVSK GDNGDTACSNEIGVGVSK GDNGDTACSNEIGVGVSK	GDNGDTACSNEIGVGVSK GDNGDTACSNEIGVGVSK GDNGDTACSNEIGVGVSK	3	1	4	7	5	5
FBN1	Fibrillin-1	FBN1_HUMAN	50Step_Domain_p1550.0_to_1600.0	1550	1600	50.0 AA STEP	50	3	2	3	5	4	3	-0.02	0	3	4	GDNGDTACSNEIGVGVSK GDNGDTACSNEIGVGVSK GDNGDTACSNEIGVGVSK	GDNGDTACSNEIGVGVSK GDNGDTACSNEIGVGVSK GDNGDTACSNEIGVGVSK	3	1	4	7	5	5
FBN1	Fibrillin-1	FBN1_HUMAN	50Step_Domain_p2750.0_to_2800.0	2750	2800	50.0 AA STEP	50	1	2	0	0	0	0	0.02	0	1	0	YLIESGNEDGFFK YLIESGNEDGFFK		1	1	0	0	0	0
FBN1	Fibrillin-1	FBN1_HUMAN	50Step_Domain_p2800.0_to_2850.0	2800	2850	50.0 AA STEP	50	1	2	0	0	0	0	0.02	0	1	0	YLIESGNEDGFFK YLIESGNEDGFFK		1	1	0	0	0	0
FBN1	Fibrillin-1	FBN1_HUMAN	50Step_Domain_p2850.0_to_2871.0	2850	2871	50.0 AA STEP	21	2	2	2	0	1	1	0.047619	0	2	1	DYLSGELGDNLK DYLSGELGDNLK DYLSGELGDNLK	DYLSGELGDNLK DYLSGELGDNLK	2	1	2	0	1	2
SAA2-SAA4	SAA2-SAA4 readthrough	A0A096LPE2_HUMAN	80Step_Domain_p0_to_80	0	80	80.0 AA STEP	80	1	0	0	0	0	0	0	1	0	0	SFFSFLGEAFDGAR		1	0	0	0	0	0
SAA2-SAA4	SAA2-SAA4 readthrough	A0A096LPE2_HUMAN	80Step_Domain_p80.0_to_160.0	80	160	80.0 AA STEP	80	9	9	0	0	0	0	0.075	0.0147	6	0	AYWDIMISNHQNSNR EALQGVGDMGR GPGGVWAAK AYWDIMISNHQNSNR EALQGVGDMGR		17	2	0	0	0	0
SAA2-SAA4	SAA2-SAA4 readthrough	A0A096LPE2_HUMAN	80Step_Domain_p160.0_to_208.0	160	208	80.0 AA STEP	48	0	0	0	0	0	0	0	1	0	0			0	0	0	0	0	0
SAA2-SAA4	SAA2-SAA4 readthrough	A0A096LPE2_HUMAN	100Step_Domain_p0_to_100	0	100	100.0 AA STEP	100	1	0	0	0	0	0	0	1	0	0	SFFSFLGEAFDGAR		1	0	0	0	0	0
SAA2-SAA4	SAA2-SAA4 readthrough	A0A096LPE2_HUMAN	100Step_Domain_p100.0_to_200.0	100	200	100.0 AA STEP	100	9	9	0	0	0	0	0.06	0.0147	6	0	AYWDIMISNHQNSNR EALQGVGDMGR GPGGVWAAK AYWDIMISNHQNSNR EALQGVGDMGR		17	2	0	0	0	0
SAA2-SAA4	SAA2-SAA4 readthrough	A0A096LPE2_HUMAN	100Step_Domain_p200.0_to_208.0	200	208	100.0 AA STEP	8	0	0	0	0	0	0	0	1	0	0			0	0	0	0	0	0
N/A	cDNA FLJ75416; highly similar to Homo sapiens complement factor H (CFH); mRNA	A8K5T0_HUMAN	Sushi	19	82	DOMAINS	63	10	6	22	10	28	28	-0.142857	0	13	22	GEWVALNPLR NTEILTGSWSDQTYPEGTQAIYK RNTEILTGSWSDQTYPEGTQAIYK GEWVALNPLR NTEILTGSWSDQTYPEGTQAIYK GEWVALNPLR NTEILTGSWSDQTYPEGTQAIYK	GEWVALNPLR NTEILTGSWSDQTYPEGTQAIYK GEWVALNPLR NTEILTGSWSDQTYPEGTQAIYK GEWVALNPLR NTEILTGSWSDQTYPEGTQAIYK	19	7	9	2	4	6
N/A	cDNA FLJ75416; highly similar to Homo sapiens complement factor H (CFH); mRNA	A8K5T0_HUMAN	Sushi_83_143	83	143	DOMAINS	60	1	0	0	0	0	0	0	1	0	0	AVYTCNEGYQLLGEINYR		2	0	0	0	0	0
N/A	cDNA FLJ75416; highly similar to Homo sapiens complement factor H (CFH); mRNA	A8K5T0_HUMAN	Sushi_144_207	144	207	DOMAINS	63	5	2	0	0	0	0	0.031746	1	2	0	EYHFGQAVR IVSSAMEPDR IVSSAMEPDREYHFGQAVR IVSSAMEPDREYHFGQAVR		10	2	0	0	0	0
N/A	cDNA FLJ75416; highly similar to Homo sapiens complement factor H (CFH); mRNA	A8K5T0_HUMAN	Sushi_208_264	208	264	DOMAINS	56	1	3	2	5	0	5	-0.0178571	1	2	3	CNMGYEYSER SPDVINGSPISQK SPDVINGSPISQK	SPDVINGSPISQK SPDVINGSPISQK	1	3	1	1	0	1
N/A	cDNA FLJ75416; highly similar to Homo sapiens complement factor H (CFH); mRNA	A8K5T0_HUMAN	Sushi_265_322	265	322	DOMAINS	57	0	0	0	0	0	0	0	1	0	0			0	0	0	0	0	0
N/A	cDNA FLJ75416; highly similar to Homo sapiens complement factor H (CFH); mRNA	A8K5T0_HUMAN	Sushi_387_444	387	444	DOMAINS	57	8	7	2	5	0	0	0.0701754	1	6	2	AQTTVTCMENGWSPTPR AQTTVTCMENGWSPTPR AQTTVTCMENGWSPTPR	AQTTVTCMENGWSPTPR	15	8	1	1	0	0
N/A	cDNA FLJ75416; highly similar to Homo sapiens complement factor H (CFH); mRNA	A8K5T0_HUMAN	Sushi_446_507	446	507	DOMAINS	61	0	0	0	0	0	0	0	1	0	0			0	0	0	0	0	0
N/A	cDNA FLJ75416; highly similar to Homo sapiens complement factor H (CFH); mRNA	A8K5T0_HUMAN	Sushi_515_566	515	566	DOMAINS	51	0	0	0	0	0	0	0	1	0	0			0	0	0	0	0	0
N/A	cDNA FLJ75416; highly similar to Homo sapiens complement factor H (CFH); mRNA	A8K5T0_HUMAN	Sushi_567_625	567	625	DOMAINS	58	5	5	2	5	0	0	0.0344828	1	4	2	EQVQSCGPPPELLNGNVK IDVHLVPDR IDVHLVPDRK IDVHLVPDR IDVHLVPDRK IDVHLVPDR	IDVHLVPDR	10	6	1	1	0	0
N/A	cDNA FLJ75416; highly similar to Homo sapiens complement factor H (CFH); mRNA	A8K5T0_HUMAN	Sushi_628_686	628	686	DOMAINS	58	2	0	0	0	0	0	0.0172414	1	1	0	EQVQSCGPPPELLNGNVK		4	0	0	0	0	0
N/A	cDNA FLJ75416; highly similar to Homo sapiens complement factor H (CFH); mRNA	A8K5T0_HUMAN	Sushi_689_746	689	746	DOMAINS	57	0	0	0	0	0	0	0	1	0	0			0	0	0	0	0	0
N/A	cDNA FLJ75416; highly similar to Homo sapiens complement factor H (CFH); mRNA	A8K5T0_HUMAN	Sushi_751_805	751	805	DOMAINS	54	5	11	7	0	0	0	0.148148	0.0057	8	0	EGWIHTVCINGR SSNLIILEEHLK EGWIHTVCINGR SSNLIILEEHLK SSNLIILEEHLK		9	12	3	0	0	0
N/A	cDNA FLJ75416; highly similar to Homo sapiens complement factor H (CFH); mRNA	A8K5T0_HUMAN	Sushi_809_866	809	866	DOMAINS	57	0	0	0	0	0	0	0	1	0	0			0	0	0	0	0	0
N/A	cDNA FLJ75416; highly similar to Homo sapiens complement factor H (CFH); mRNA	A8K5T0_HUMAN	Sushi_868_928	868	928	DOMAINS	60	0	0	0	0	0	0	0	1	0	0			0	0	0	0	0	0
N/A	cDNA FLJ75416; highly similar to Homo sapiens complement factor H (CFH); mRNA	A8K5T0_HUMAN	Sushi_929_986	929	986	DOMAINS	57	3	2	0	0	0	0	0.0350877	1	2	0	SPPEISHGVVAHMSDSYQYGEEVTYK SPPEISHGVVAHMSDSYQYGEEVTYK		6	2	0	0	0	0
N/A	cDNA FLJ75416; highly similar to Homo sapiens complement factor H (CFH); mRNA	A8K5T0_HUMAN	Sushi_987_1045	987	1045	DOMAINS	58	0	0	0	0	0	0	0	1	0	0			0	0	0	0	0	0
N/A	cDNA FLJ75416; highly similar to Homo sapiens complement factor H (CFH); mRNA	A8K5T0_HUMAN	Sushi_1046_1104	1046	1104	DOMAINS	58	0	0	0	0	0	0	0	1	0	0			0	0	0	0	0	0
N/A	cDNA FLJ75416; highly similar to Homo sapiens complement factor H (CFH); mRNA	A8K5T0_HUMAN	Sushi_1107_1165	1107	1165	DOMAINS	58	0	0	0	0	0	0	0	1	0	0			0	0	0	0	0	0
N/A	cDNA FLJ75416; highly similar to Homo sapiens complement factor H (CFH); mRNA	A8K5T0_HUMAN	Sushi_1194_1230	1194	1230	DOMAINS	36	0	0	0	0	0	0	0	1	0	0			0	0	0	0	0	0
okuribin	Nuclear envelope protein okuribin	A3KC71_HUMAN	50Step_Domain_p150.0_to_200.0	150	200	50.0 AA STEP	50	7	16	9	2	4	5	0.14	0	11	4	HIQQIVLFHQAGEEGGK VWVISAPHASEGYYR HIQQIVLFHQAGEEGGK VWVISAPHASEGYYR HIQQIVLFHQAGEEGGK VWVISAPHASEGYYR	VWVISAPHASEGYYR VWVISAPHASEGYYR VWVISAPHASEGYYR	7	20	14	1	2	3
okuribin	Nuclear envelope protein okuribin	A3KC71_HUMAN	50Step_Domain_p650.0_to_700.0	650	700	50.0 AA STEP	50	21	10	15	26	21	27	-0.2	0	15	25	IDHFQLDNEKPMR VVDDEDLVDQR IDHFQLDNEKPMR VVDDEDLVDQR IDHFQLDNEKPMR VVDDEDLVDQR	VVDDEDLVDQR VVDDEDLVDQR VVDDEDLVDQR	22	12	22	13	11	15
CCDC80	Coiled-coil domain-containing protein 80	CCD80_HUMAN	50Step_Domain_p150.0_to_200.0	150	200	50.0 AA STEP	50	7	16	9	2	4	5	0.14	0	11	4	HIQQIVLFHQAGEEGGK VWVISAPHASEGYYR HIQQIVLFHQAGEEGGK VWVISAPHASEGYYR HIQQIVLFHQAGEEGGK VWVISAPHASEGYYR	VWVISAPHASEGYYR VWVISAPHASEGYYR VWVISAPHASEGYYR	7	20	14	1	2	3
CCDC80	Coiled-coil domain-containing protein 80	CCD80_HUMAN	50Step_Domain_p650.0_to_700.0	650	700	50.0 AA STEP	50	21	10	15	26	21	27	-0.2	0	15	25	IDHFQLDNEKPMR VVDDEDLVDQR IDHFQLDNEKPMR VVDDEDLVDQR IDHFQLDNEKPMR VVDDEDLVDQR	VVDDEDLVDQR VVDDEDLVDQR VVDDEDLVDQR	22	12	22	13	11	15
N/A	EGF-containing fibulin-like extracellular matrix protein 1 isoform b variant	Q59G97_HUMAN	50Step_Domain_p350.0_to_400.0	350	400	50.0 AA STEP	50	3	3	0	0	0	0	0.04	0	2	0	EHIVDLEMLTVSSIGTFR QTSPVSAMLVLVK SGNENGEFYLR SVPSDIFQIQATTIYANTINTFR EHIVDLEMLTVSSIGTFR QTSPVSAMLVLVK SVPSDIFQIQATTIYANTINTFR		6	5	0	0	0	0
FLT1	Vascular endothelial growth factor receptor 1	VGFR1_HUMAN	50Step_Domain_p400.0_to_450.0	400	450	50.0 AA STEP	50	0	2	1	0	0	0	0.02	0	1	0	AVSSFPDPALYPLGSR AVSSFPDPALYPLGSR		0	1	2	0	0	0
FLT1	Vascular endothelial growth factor receptor 1	VGFR1_HUMAN	50Step_Domain_p550.0_to_600.0	550	600	50.0 AA STEP	50	1	2	1	0	0	0	0.02	0	1	0	MPTEGEDLK DVTWILLR MPTEGEDLK		2	1	1	0	0	0
N/A	Tubulin alpha chain	B3KT06_HUMAN	50Step_Domain_p50.0_to_100.0	50	100	50.0 AA STEP	50	3	3	2	1	0	1	0.04	0	3	1	EIIDLVLDR EIIDLVLDR EIIDLVLDR QLFHPEQLITGK	EIIDLVLDR EIIDLVLDR	1	4	3	1	0	1
LOXL3	Lysyl oxidase homolog 3	LOXL3_HUMAN	50Step_Domain_p400.0_to_450.0	400	450	50.0 AA STEP	50	0	1	1	2	5	2	-0.04	0	1	3	VEVQIGGPGPLR VEVQIGGPGPLR	VEVQIGGPGPLR VEVQIGGPGPLR VEVQIGGPGPLR	0	2	1	1	3	2
LAMB2	Laminin subunit beta-2	LAMB2_HUMAN	50Step_Domain_p550.0_to_600.0	550	600	50.0 AA STEP	50	0	0	0	1	1	0	-0.02	0	0	1		GQVLDVVER LVTPGETPSWTGSGFVR GQVLDVVER LVTPGETPSWTGSGFVR	0	0	0	2	2	0
LAMB2	Laminin subunit beta-2	LAMB2_HUMAN	50Step_Domain_p600.0_to_650.0	600	650	50.0 AA STEP	50	0	0	0	1	1	0	-0.02	0	0	1		LVTPGETPSWTGSGFVR LVTPGETPSWTGSGFVR	0	0	0	1	1	0
MXRA5	Matrix-remodeling-associated protein 5	MXRA5_HUMAN	50Step_Domain_p250.0_to_300.0	250	300	50.0 AA STEP	50	5	7	6	14	10	11	-0.12	0	6	12	SIEEEQEQEEDGGSQLILEK SIEEEQEQEEDGGSQLILEK SIEEEQEQEEDGGSQLILEK	SIEEEQEQEEDGGSQLILEK SIEEEQEQEEDGGSQLILEK SIEEEQEQEEDGGSQLILEK	5	5	8	15	8	9
MXRA5	Matrix-remodeling-associated protein 5	MXRA5_HUMAN	50Step_Domain_p300.0_to_350.0	300	350	50.0 AA STEP	50	5	7	6	14	10	11	-0.12	0	6	12	SIEEEQEQEEDGGSQLILEK SIEEEQEQEEDGGSQLILEK SIEEEQEQEEDGGSQLILEK	SIEEEQEQEEDGGSQLILEK SIEEEQEQEEDGGSQLILEK SIEEEQEQEEDGGSQLILEK	5	5	8	15	8	9
MXRA5	Matrix-remodeling-associated protein 5	MXRA5_HUMAN	50Step_Domain_p350.0_to_400.0	350	400	50.0 AA STEP	50	2	1	1	4	4	4	-0.06	0	1	4	LIAYYSEVPVK LIAYYSEVPVK LIAYYSEVPVK	LIAYYSEVPVK LIAYYSEVPVK LIAYYSEVPVK	2	1	1	4	3	3
MXRA5	Matrix-remodeling-associated protein 5	MXRA5_HUMAN	50Step_Domain_p400.0_to_450.0	400	450	50.0 AA STEP	50	6	1	3	0	0	0	0.06	0	3	0	QDADEEALYYTGVR QDADEEALYYTGVR QDADEEALYYTGVR		6	1	4	0	0	0
MXRA5	Matrix-remodeling-associated protein 5	MXRA5_HUMAN	50Step_Domain_p2150.0_to_2200.0	2150	2200	50.0 AA STEP	50	4	4	5	0	1	0	0.08	0	4	0	MIDALFSFDSR MIDALFSFDSR MIDALFSFDSR	MIDALFSFDSR	4	3	6	0	1	0
SERPINC1	Antithrombin-III	ANT3_HUMAN	50Step_Domain_p50.0_to_100.0	50	100	50.0 AA STEP	50	12	6	7	0	0	0	0.16	0	8	0	ATEDEGSEQKIPEATNR FATTFYQHLADSK KATEDEGSEQKIPEATNR ATEDEGSEQKIPEATNR FATTFYQHLADSK ATEDEGSEQKIPEATNR FATTFYQHLADSK		22	11	2	0	0	0
SERPINC1	Antithrombin-III	ANT3_HUMAN	50Step_Domain_p350.0_to_400.0	350	400	50.0 AA STEP	50	15	17	27	0	0	0	0.4	0	20	0	DDLYVSDAFHK EQLQDMGLVDLFSPEK FRIEDGFSLK IEDGFSLK LPGIVAEGR SKLPGIVAEGR DDLYVSDAFHK ELTPEVLQEWLDELEEMMLVVHMPR EQLQDMGLVDLFSPEK FRIEDGFSLK IEDGFSLK LPGIVAEGR SKLPGIVAEGR DDLYVSDAFHK EQLQDMGLVDLFSPEK IEDGFSLK LPGIVAEGR		27	34	8	0	0	0
SERPINC1	Antithrombin-III	ANT3_HUMAN	50Step_Domain_p400.0_to_450.0	400	450	50.0 AA STEP	50	14	15	14	0	0	0	0.28	0	14	0	AFLEVNEEGSEAAASTAVVIAGR DDLYVSDAFHK EVPLNTIIFMGR AFLEVNEEGSEAAASTAVVIAGR DDLYVSDAFHK EVPLNTIIFMGR DDLYVSDAFHK EVPLNTIIFMGR		26	30	4	0	0	0
A2M	Alpha-2-macroglobulin	A2MG_HUMAN	50Step_Domain_p200.0_to_250.0	200	250	50.0 AA STEP	50	25	18	18	42	24	55	-0.4	0	20	40	FEVQVTVPK QFSFPLSSEPFQGSYK TEHPFTVEEFVLPK FEVQVTVPK QFSFPLSSEPFQGSYK TEHPFTVEEFVLPK FEVQVTVPK QFSFPLSSEPFQGSYK TEHPFTVEEFVLPK	QFSFPLSSEPFQGSYK TEHPFTVEEFVLPK FEVQVTVPK QFSFPLSSEPFQGSYK FEVQVTVPK QFSFPLSSEPFQGSYK TEHPFTVEEFVLPK	27	17	33	11	4	8
A2M	Alpha-2-macroglobulin	A2MG_HUMAN	50Step_Domain_p300.0_to_350.0	300	350	50.0 AA STEP	50	38	18	42	8	0	0	0.6	0	33	3	FSGQLNSHGCFYQQVK LHTEAQIQEEGTVVELTGR FSGQLNSHGCFYQQVK LHTEAQIQEEGTVVELTGR FSGQLNSHGCFYQQVK LHTEAQIQEEGTVVELTGR	LHTEAQIQEEGTVVELTGR	41	17	78	2	0	0
COL11A2	Collagen alpha-2(XI) chain	A0A140T9I7_HUMAN	50Step_Domain_p1550.0_to_1600.0	1550	1600	50.0 AA STEP	50	14	17	18	20	20	37	-0.2	0	16	26	GANEDELSPETSPYVK GANEDELSPETSPYVK TPVLEQLPVLDASFSDLGAPPR GANEDELSPETSPYVK TPVLEQLPVLDASFSDLGAPPR	GANEDELSPETSPYVK GANEDELSPETSPYVKEFR LRGANEDELSPETSPYVK TPVLEQLPVLDASFSDLGAPPR GANEDELSPETSPYVK LRGANEDELSPETSPYVK TPVLEQLPVLDASFSDLGAPPR TPVLEQLPVLDASFSDLGAPPRR GANEDELSPETSPYVK LRGANEDELSPETSPYVK TPVLEQLPVLDASFSDLGAPPR	2	5	7	28	31	68
CP	Ceruloplasmin	CERU_HUMAN	50Step_Domain_p200.0_to_250.0	200	250	50.0 AA STEP	50	0	0	0	14	15	13	-0.28	0	0	14		VDKDNEDFQESNR VDKDNEDFQESNR VDKDNEDFQESNR	0	0	0	10	9	7
CP	Ceruloplasmin	CERU_HUMAN	50Step_Domain_p250.0_to_300.0	250	300	50.0 AA STEP	50	3	6	2	20	17	14	-0.26	0	4	17	MYSVNGYTFGSLPGLSMCAEDR MYSVNGYTFGSLPGLSMCAEDR WYLFGMGNEVDVHAAFFHGQALTNK MYSVNGYTFGSLPGLSMCAEDR	MYSVNGYTFGSLPGLSMCAEDR VDKDNEDFQESNR MYSVNGYTFGSLPGLSMCAEDR VDKDNEDFQESNR MYSVNGYTFGSLPGLSMCAEDR VDKDNEDFQESNR	4	8	1	14	10	8
CP	Ceruloplasmin	CERU_HUMAN	50Step_Domain_p550.0_to_600.0	550	600	50.0 AA STEP	50	15	18	18	29	20	34	-0.22	0	17	28	DIFTGLIGPMK DVDKEFYLFPTVFDENESLLLEDNIR MFTTAPDQVDKEDEDFQESNK DIFTGLIGPMK DVDKEFYLFPTVFDENESLLLEDNIR EFYLFPTVFDENESLLLEDNIR MFTTAPDQVDKEDEDFQESNK DIFTGLIGPMK MFTTAPDQVDKEDEDFQESNK	DIFTGLIGPMK MFTTAPDQVDKEDEDFQESNK DIFTGLIGPMK EFYLFPTVFDENESLLLEDNIR MFTTAPDQVDKEDEDFQESNK DIFTGLIGPMK MFTTAPDQVDKEDEDFQESNK	24	25	8	20	12	19
N/A	cDNA FLJ75416; highly similar to Homo sapiens complement factor H (CFH); mRNA	A8K5T0_HUMAN	80Step_Domain_p0_to_80	0	80	80.0 AA STEP	80	10	6	22	10	28	28	-0.1125	0.0016	13	22	GEWVALNPLR NTEILTGSWSDQTYPEGTQAIYK RNTEILTGSWSDQTYPEGTQAIYK GEWVALNPLR NTEILTGSWSDQTYPEGTQAIYK GEWVALNPLR NTEILTGSWSDQTYPEGTQAIYK	GEWVALNPLR NTEILTGSWSDQTYPEGTQAIYK GEWVALNPLR NTEILTGSWSDQTYPEGTQAIYK GEWVALNPLR NTEILTGSWSDQTYPEGTQAIYK	19	7	9	2	4	6
N/A	cDNA FLJ75416; highly similar to Homo sapiens complement factor H (CFH); mRNA	A8K5T0_HUMAN	80Step_Domain_p80.0_to_160.0	80	160	80.0 AA STEP	80	6	2	0	0	0	0	0.0375	1	3	0	AVYTCNEGYQLLGEINYR IVSSAMEPDR IVSSAMEPDREYHFGQAVR IVSSAMEPDREYHFGQAVR		11	2	0	0	0	0
N/A	cDNA FLJ75416; highly similar to Homo sapiens complement factor H (CFH); mRNA	A8K5T0_HUMAN	80Step_Domain_p160.0_to_240.0	160	240	80.0 AA STEP	80	6	5	2	5	0	5	0.0125	1	4	3	CNMGYEYSER EYHFGQAVR IVSSAMEPDR IVSSAMEPDREYHFGQAVR IVSSAMEPDREYHFGQAVR SPDVINGSPISQK SPDVINGSPISQK	SPDVINGSPISQK SPDVINGSPISQK	11	5	1	1	0	1
N/A	cDNA FLJ75416; highly similar to Homo sapiens complement factor H (CFH); mRNA	A8K5T0_HUMAN	80Step_Domain_p240.0_to_320.0	240	320	80.0 AA STEP	80	1	0	0	0	0	0	0	1	0	0	CNMGYEYSER		1	0	0	0	0	0
N/A	cDNA FLJ75416; highly similar to Homo sapiens complement factor H (CFH); mRNA	A8K5T0_HUMAN	80Step_Domain_p320.0_to_400.0	320	400	80.0 AA STEP	80	0	0	0	0	0	0	0	1	0	0			0	0	0	0	0	0
N/A	cDNA FLJ75416; highly similar to Homo sapiens complement factor H (CFH); mRNA	A8K5T0_HUMAN	80Step_Domain_p400.0_to_480.0	400	480	80.0 AA STEP	80	8	7	2	5	0	0	0.05	1	6	2	AQTTVTCMENGWSPTPR AQTTVTCMENGWSPTPR AQTTVTCMENGWSPTPR	AQTTVTCMENGWSPTPR	15	8	1	1	0	0
N/A	cDNA FLJ75416; highly similar to Homo sapiens complement factor H (CFH); mRNA	A8K5T0_HUMAN	80Step_Domain_p480.0_to_560.0	480	560	80.0 AA STEP	80	0	0	0	0	0	0	0	1	0	0			0	0	0	0	0	0
N/A	cDNA FLJ75416; highly similar to Homo sapiens complement factor H (CFH); mRNA	A8K5T0_HUMAN	80Step_Domain_p560.0_to_640.0	560	640	80.0 AA STEP	80	5	5	2	5	0	0	0.025	1	4	2	EQVQSCGPPPELLNGNVK IDVHLVPDR IDVHLVPDRK IDVHLVPDR IDVHLVPDRK IDVHLVPDR	IDVHLVPDR	10	6	1	1	0	0
N/A	cDNA FLJ75416; highly similar to Homo sapiens complement factor H (CFH); mRNA	A8K5T0_HUMAN	80Step_Domain_p640.0_to_720.0	640	720	80.0 AA STEP	80	2	0	0	0	0	0	0.0125	1	1	0	EQVQSCGPPPELLNGNVK		4	0	0	0	0	0
N/A	cDNA FLJ75416; highly similar to Homo sapiens complement factor H (CFH); mRNA	A8K5T0_HUMAN	80Step_Domain_p720.0_to_800.0	720	800	80.0 AA STEP	80	5	11	7	0	0	0	0.1	0.024	8	0	EGWIHTVCINGR SSNLIILEEHLK EGWIHTVCINGR SSNLIILEEHLK SSNLIILEEHLK		9	12	3	0	0	0
N/A	cDNA FLJ75416; highly similar to Homo sapiens complement factor H (CFH); mRNA	A8K5T0_HUMAN	80Step_Domain_p800.0_to_880.0	800	880	80.0 AA STEP	80	0	0	0	0	0	0	0	1	0	0			0	0	0	0	0	0
N/A	cDNA FLJ75416; highly similar to Homo sapiens complement factor H (CFH); mRNA	A8K5T0_HUMAN	80Step_Domain_p880.0_to_960.0	880	960	80.0 AA STEP	80	3	2	0	0	0	0	0.025	1	2	0	SPPEISHGVVAHMSDSYQYGEEVTYK SPPEISHGVVAHMSDSYQYGEEVTYK		6	2	0	0	0	0
N/A	cDNA FLJ75416; highly similar to Homo sapiens complement factor H (CFH); mRNA	A8K5T0_HUMAN	80Step_Domain_p960.0_to_1040.0	960	1040	80.0 AA STEP	80	0	0	0	0	0	0	0	1	0	0			0	0	0	0	0	0
N/A	cDNA FLJ75416; highly similar to Homo sapiens complement factor H (CFH); mRNA	A8K5T0_HUMAN	80Step_Domain_p1040.0_to_1120.0	1040	1120	80.0 AA STEP	80	0	0	0	0	0	0	0	1	0	0			0	0	0	0	0	0
N/A	cDNA FLJ75416; highly similar to Homo sapiens complement factor H (CFH); mRNA	A8K5T0_HUMAN	80Step_Domain_p1120.0_to_1200.0	1120	1200	80.0 AA STEP	80	3	5	5	16	14	9	-0.1125	0.0064	4	13	EIMENYNIALR EIMENYNIALR EIMENYNIALR	EIMENYNIALR EIMENYNIALR EIMENYNIALR	6	6	2	3	2	2
N/A	cDNA FLJ75416; highly similar to Homo sapiens complement factor H (CFH); mRNA	A8K5T0_HUMAN	80Step_Domain_p1200.0_to_1231.0	1200	1231	80.0 AA STEP	31	0	0	0	0	0	0	0	1	0	0			0	0	0	0	0	0
N/A	cDNA FLJ75416; highly similar to Homo sapiens complement factor H (CFH); mRNA	A8K5T0_HUMAN	100Step_Domain_p0_to_100	0	100	100.0 AA STEP	100	10	6	22	10	28	28	-0.09	0.0078	13	22	GEWVALNPLR NTEILTGSWSDQTYPEGTQAIYK RNTEILTGSWSDQTYPEGTQAIYK GEWVALNPLR NTEILTGSWSDQTYPEGTQAIYK GEWVALNPLR NTEILTGSWSDQTYPEGTQAIYK	GEWVALNPLR NTEILTGSWSDQTYPEGTQAIYK GEWVALNPLR NTEILTGSWSDQTYPEGTQAIYK GEWVALNPLR NTEILTGSWSDQTYPEGTQAIYK	19	7	9	2	4	6
N/A	cDNA FLJ75416; highly similar to Homo sapiens complement factor H (CFH); mRNA	A8K5T0_HUMAN	100Step_Domain_p100.0_to_200.0	100	200	100.0 AA STEP	100	6	2	0	0	0	0	0.03	1	3	0	AVYTCNEGYQLLGEINYR EYHFGQAVR IVSSAMEPDR IVSSAMEPDREYHFGQAVR IVSSAMEPDREYHFGQAVR		12	2	0	0	0	0
N/A	cDNA FLJ75416; highly similar to Homo sapiens complement factor H (CFH); mRNA	A8K5T0_HUMAN	100Step_Domain_p200.0_to_300.0	200	300	100.0 AA STEP	100	1	3	2	5	0	5	-0.01	1	2	3	CNMGYEYSER SPDVINGSPISQK SPDVINGSPISQK	SPDVINGSPISQK SPDVINGSPISQK	1	3	1	1	0	1
N/A	cDNA FLJ75416; highly similar to Homo sapiens complement factor H (CFH); mRNA	A8K5T0_HUMAN	100Step_Domain_p300.0_to_400.0	300	400	100.0 AA STEP	100	0	0	0	0	0	0	0	1	0	0			0	0	0	0	0	0
N/A	cDNA FLJ75416; highly similar to Homo sapiens complement factor H (CFH); mRNA	A8K5T0_HUMAN	100Step_Domain_p400.0_to_500.0	400	500	100.0 AA STEP	100	8	7	2	5	0	0	0.04	1	6	2	AQTTVTCMENGWSPTPR AQTTVTCMENGWSPTPR AQTTVTCMENGWSPTPR	AQTTVTCMENGWSPTPR	15	8	1	1	0	0
N/A	cDNA FLJ75416; highly similar to Homo sapiens complement factor H (CFH); mRNA	A8K5T0_HUMAN	100Step_Domain_p500.0_to_600.0	500	600	100.0 AA STEP	100	3	5	2	5	0	0	0.01	1	3	2	IDVHLVPDR IDVHLVPDRK IDVHLVPDR IDVHLVPDRK IDVHLVPDR	IDVHLVPDR	6	6	1	1	0	0
N/A	cDNA FLJ75416; highly similar to Homo sapiens complement factor H (CFH); mRNA	A8K5T0_HUMAN	100Step_Domain_p600.0_to_700.0	600	700	100.0 AA STEP	100	2	0	0	0	0	0	0.01	1	1	0	EQVQSCGPPPELLNGNVK		4	0	0	0	0	0
N/A	cDNA FLJ75416; highly similar to Homo sapiens complement factor H (CFH); mRNA	A8K5T0_HUMAN	100Step_Domain_p700.0_to_800.0	700	800	100.0 AA STEP	100	5	11	7	0	0	0	0.08	0.052	8	0	EGWIHTVCINGR SSNLIILEEHLK EGWIHTVCINGR SSNLIILEEHLK SSNLIILEEHLK		9	12	3	0	0	0
N/A	cDNA FLJ75416; highly similar to Homo sapiens complement factor H (CFH); mRNA	A8K5T0_HUMAN	100Step_Domain_p800.0_to_900.0	800	900	100.0 AA STEP	100	0	0	0	0	0	0	0	1	0	0			0	0	0	0	0	0
N/A	cDNA FLJ75416; highly similar to Homo sapiens complement factor H (CFH); mRNA	A8K5T0_HUMAN	100Step_Domain_p900.0_to_1000.0	900	1000	100.0 AA STEP	100	3	2	0	0	0	0	0.02	1	2	0	SPPEISHGVVAHMSDSYQYGEEVTYK SPPEISHGVVAHMSDSYQYGEEVTYK		6	2	0	0	0	0
N/A	cDNA FLJ75416; highly similar to Homo sapiens complement factor H (CFH); mRNA	A8K5T0_HUMAN	100Step_Domain_p1000.0_to_1100.0	1000	1100	100.0 AA STEP	100	0	0	0	0	0	0	0	1	0	0			0	0	0	0	0	0
N/A	cDNA FLJ75416; highly similar to Homo sapiens complement factor H (CFH); mRNA	A8K5T0_HUMAN	100Step_Domain_p1100.0_to_1200.0	1100	1200	100.0 AA STEP	100	3	5	5	16	14	9	-0.09	0.0169	4	13	EIMENYNIALR EIMENYNIALR EIMENYNIALR	EIMENYNIALR EIMENYNIALR EIMENYNIALR	6	6	2	3	2	2
N/A	cDNA FLJ75416; highly similar to Homo sapiens complement factor H (CFH); mRNA	A8K5T0_HUMAN	100Step_Domain_p1200.0_to_1231.0	1200	1231	100.0 AA STEP	31	0	0	0	0	0	0	0	1	0	0			0	0	0	0	0	0
CFH	Complement factor H	CFAH_HUMAN	Sushi 1	19	82	DOMAINS	63	10	6	22	10	28	28	-0.142857	0	13	22	GEWVALNPLR NTEILTGSWSDQTYPEGTQAIYK RNTEILTGSWSDQTYPEGTQAIYK GEWVALNPLR NTEILTGSWSDQTYPEGTQAIYK GEWVALNPLR NTEILTGSWSDQTYPEGTQAIYK	GEWVALNPLR NTEILTGSWSDQTYPEGTQAIYK GEWVALNPLR NTEILTGSWSDQTYPEGTQAIYK GEWVALNPLR NTEILTGSWSDQTYPEGTQAIYK	19	7	9	2	4	6
CFH	Complement factor H	CFAH_HUMAN	Sushi 2	83	143	DOMAINS	60	1	0	0	0	0	0	0	1	0	0	AVYTCNEGYQLLGEINYR		2	0	0	0	0	0
CFH	Complement factor H	CFAH_HUMAN	Sushi 3	144	207	DOMAINS	63	5	2	0	0	0	0	0.031746	1	2	0	EYHFGQAVR IVSSAMEPDR IVSSAMEPDREYHFGQAVR IVSSAMEPDREYHFGQAVR		10	2	0	0	0	0
CFH	Complement factor H	CFAH_HUMAN	Sushi 4	208	264	DOMAINS	56	1	3	2	5	0	5	-0.0178571	1	2	3	CNMGYEYSER SPDVINGSPISQK SPDVINGSPISQK	SPDVINGSPISQK SPDVINGSPISQK	1	3	1	1	0	1
CFH	Complement factor H	CFAH_HUMAN	Sushi 5	265	322	DOMAINS	57	0	0	0	0	0	0	0	1	0	0			0	0	0	0	0	0
CFH	Complement factor H	CFAH_HUMAN	Sushi 6	324	386	DOMAINS	62	0	0	0	0	0	0	0	1	0	0			0	0	0	0	0	0
CFH	Complement factor H	CFAH_HUMAN	Sushi 7	387	444	DOMAINS	57	8	7	2	5	0	0	0.0701754	1	6	2	AQTTVTCMENGWSPTPR AQTTVTCMENGWSPTPR AQTTVTCMENGWSPTPR	AQTTVTCMENGWSPTPR	15	8	1	1	0	0
CFH	Complement factor H	CFAH_HUMAN	Sushi 8	446	507	DOMAINS	61	0	0	0	0	0	0	0	1	0	0			0	0	0	0	0	0
CFH	Complement factor H	CFAH_HUMAN	Sushi 9	515	566	DOMAINS	51	0	0	0	0	0	0	0	1	0	0			0	0	0	0	0	0
CFH	Complement factor H	CFAH_HUMAN	Sushi 10	567	625	DOMAINS	58	5	5	2	5	0	0	0.0344828	1	4	2	EQVQSCGPPPELLNGNVK IDVHLVPDR IDVHLVPDRK IDVHLVPDR IDVHLVPDRK IDVHLVPDR	IDVHLVPDR	10	6	1	1	0	0
CFH	Complement factor H	CFAH_HUMAN	Sushi 11	628	686	DOMAINS	58	2	0	0	0	0	0	0.0172414	1	1	0	EQVQSCGPPPELLNGNVK		4	0	0	0	0	0
CFH	Complement factor H	CFAH_HUMAN	Sushi 12	689	746	DOMAINS	57	0	0	0	0	0	0	0	1	0	0			0	0	0	0	0	0
CFH	Complement factor H	CFAH_HUMAN	Sushi 13	751	805	DOMAINS	54	5	11	7	0	0	0	0.148148	0.006	8	0	EGWIHTVCINGR SSNLIILEEHLK EGWIHTVCINGR SSNLIILEEHLK SSNLIILEEHLK		9	12	3	0	0	0
CFH	Complement factor H	CFAH_HUMAN	Sushi 14	809	866	DOMAINS	57	0	0	0	0	0	0	0	1	0	0			0	0	0	0	0	0
CFH	Complement factor H	CFAH_HUMAN	Sushi 15	868	928	DOMAINS	60	0	0	0	0	0	0	0	1	0	0			0	0	0	0	0	0
CFH	Complement factor H	CFAH_HUMAN	Sushi 16	929	986	DOMAINS	57	3	2	0	0	0	0	0.0350877	1	2	0	SPPEISHGVVAHMSDSYQYGEEVTYK SPPEISHGVVAHMSDSYQYGEEVTYK		6	2	0	0	0	0
CFH	Complement factor H	CFAH_HUMAN	Sushi 17	987	1045	DOMAINS	58	0	0	0	0	0	0	0	1	0	0			0	0	0	0	0	0
CFH	Complement factor H	CFAH_HUMAN	Sushi 18	1046	1104	DOMAINS	58	0	0	0	0	0	0	0	1	0	0			0	0	0	0	0	0
CFH	Complement factor H	CFAH_HUMAN	Sushi 19	1107	1165	DOMAINS	58	0	0	0	0	0	0	0	1	0	0			0	0	0	0	0	0
CFH	Complement factor H	CFAH_HUMAN	Sushi 20	1170	1230	DOMAINS	60	3	5	5	16	14	9	-0.15	0.002	4	13	EIMENYNIALR EIMENYNIALR EIMENYNIALR	EIMENYNIALR EIMENYNIALR EIMENYNIALR	6	6	2	3	2	2
DKFZp686O12165	Fibronectin	Q6MZM7_HUMAN	50Step_Domain_p950.0_to_1000.0	950	1000	50.0 AA STEP	50	11	7	8	0	0	0	0.18	0	9	0	DDKESVPISDTIIPEVPQLTDLSFVDITDSSIGLR DDKESVPISDTIIPEVPQLTDLSFVDITDSSIGLR DDKESVPISDTIIPEVPQLTDLSFVDITDSSIGLR		21	10	12	0	0	0
DKFZp686O12165	Fibronectin	Q6MZM7_HUMAN	50Step_Domain_p1000.0_to_1050.0	1000	1050	50.0 AA STEP	50	12	10	12	0	0	0	0.22	0	11	0	DDKESVPISDTIIPEVPQLTDLSFVDITDSSIGLR ESVPISDTIIPEVPQLTDLSFVDITDSSIGLR DDKESVPISDTIIPEVPQLTDLSFVDITDSSIGLR ESVPISDTIIPEVPQLTDLSFVDITDSSIGLR DDKESVPISDTIIPEVPQLTDLSFVDITDSSIGLR ESVPISDTIIPEVPQLTDLSFVDITDSSIGLR		23	15	17	0	0	0
VTN	Vitronectin	VTNC_HUMAN	50Step_Domain_p200.0_to_250.0	200	250	50.0 AA STEP	50	26	20	60	0	0	0	0.7	0	35	0	DVWGIEGPIDAAFTR FEDGVLDPDYPR NISDGFDGIPDNVDAALALPAHSYSGR DVWGIEGPIDAAFTR FEDGVLDPDYPR DVWGIEGPIDAAFTR FEDGVLDPDYPR		52	8	4	0	0	0
N/A	cDNA FLJ51597; highly similar to C4b-binding protein alpha chain	B4E1D8_HUMAN	50Step_Domain_p500.0_to_536.0	500	536	50.0 AA STEP	36	1	4	3	0	0	0	0.0833333	0	3	0	LSLEIEQLELQR LSLEIEQLELQR LSLEIEQLELQR		1	3	1	0	0	0
N/A	cDNA FLJ51598; highly similar to C4b-binding protein alpha chain	B4E1E1_HUMAN	50Step_Domain_p250.0_to_300.0	250	300	50.0 AA STEP	50	2	1	3	0	0	0	0.04	0	2	0	EDVYVVGTVLR EDVYVVGTVLR EDVYVVGTVLR		4	1	1	0	0	0
N/A	cDNA FLJ51598; highly similar to C4b-binding protein alpha chain	B4E1E1_HUMAN	50Step_Domain_p500.0_to_550.0	500	550	50.0 AA STEP	50	1	4	3	0	0	0	0.06	0	3	0	LSLEIEQLELQR LSLEIEQLELQR LSLEIEQLELQR		1	3	1	0	0	0
C4BPA	C4b-binding protein alpha chain	C4BPA_HUMAN	50Step_Domain_p300.0_to_350.0	300	350	50.0 AA STEP	50	2	1	3	0	0	0	0.04	0	2	0	EDVYVVGTVLR EDVYVVGTVLR EDVYVVGTVLR		4	1	1	0	0	0
C4BPA	C4b-binding protein alpha chain	C4BPA_HUMAN	50Step_Domain_p550.0_to_597.0	550	597	50.0 AA STEP	47	1	4	3	0	0	0	0.0638298	0	3	0	LSLEIEQLELQR LSLEIEQLELQR LSLEIEQLELQR		1	3	1	0	0	0
N/A	C3/C5 convertase	B4E1Z4_HUMAN	50Step_Domain_p200.0_to_250.0	200	250	50.0 AA STEP	50	5	9	6	0	0	0	0.14	0	7	0	HAIILLTDGK LLGMETMAWQEIR NDYLDIYAIGVGK HAIILLTDGK LLGMETMAWQEIR NDYLDIYAIGVGK HAIILLTDGK LLGMETMAWQEIR		8	13	3	0	0	0
N/A	C3/C5 convertase	B4E1Z4_HUMAN	50Step_Domain_p800.0_to_850.0	800	850	50.0 AA STEP	50	15	7	12	24	23	31	-0.3	0	11	26	CLVNLIEK QLNEINYEDHK VSEADSSNADWVTK YGLVTYATYPK CLVNLIEK QLNEINYEDHK VSEADSSNADWVTK YGLVTYATYPK QLNEINYEDHK VSEADSSNADWVTK YGLVTYATYPK	QLNEINYEDHK VSEADSSNADWVTK YGLVTYATYPK QLNEINYEDHK VSEADSSNADWVTK YGLVTYATYPK QLNEINYEDHK VSEADSSNADWVTK YGLVTYATYPK	26	11	6	10	6	8
N/A	C3/C5 convertase	B4E1Z4_HUMAN	50Step_Domain_p1050.0_to_1100.0	1050	1100	50.0 AA STEP	50	6	11	16	5	4	4	0.14	0	11	4	EAGIPEFYDYDVALIK KEAGIPEFYDYDVALIK EAGIPEFYDYDVALIK KEAGIPEFYDYDVALIK EAGIPEFYDYDVALIK KEAGIPEFYDYDVALIK	EAGIPEFYDYDVALIK EAGIPEFYDYDVALIK EAGIPEFYDYDVALIK	10	16	8	2	1	1
VASN	Vasorin	VASN_HUMAN	50Step_Domain_p200.0_to_250.0	200	250	50.0 AA STEP	50	0	0	0	2	1	3	-0.04	0	0	2		LAGLGLQQLDEGLFSR NLHDLDVSDNQLER LAGLGLQQLDEGLFSR LAGLGLQQLDEGLFSR NLHDLDVSDNQLER	0	0	0	3	1	4
FNDC1	Fibronectin type III domain-containing protein 1	FNDC1_HUMAN	50Step_Domain_p250.0_to_300.0	250	300	50.0 AA STEP	50	7	11	7	4	3	2	0.1	0	8	3	ISEEDELDVPDDISVR ISEEDELDVPDDISVR ISEEDELDVPDDISVR	ISEEDELDVPDDISVR ISEEDELDVPDDISVR VMSSQSVLVSWVDPVLEK ISEEDELDVPDDISVR	2	4	3	7	5	2
N/A	Actin-depolymerizing factor	B7Z992_HUMAN	50Step_Domain_p350.0_to_400.0	350	400	50.0 AA STEP	50	8	12	10	5	0	3	0.14	0	10	3	DPDQTDGLGLSYLSSHIANVER VPFDAATLHTSTAMAAQHGMDDDGTGQK VPVDPATYGQFYGGDSYIILYNYR DPDQTDGLGLSYLSSHIANVER IEGSNKVPVDPATYGQFYGGDSYIILYNYR NWRDPDQTDGLGLSYLSSHIANVER VPFDAATLHTSTAMAAQHGMDDDGTGQK VPVDPATYGQFYGGDSYIILYNYR DPDQTDGLGLSYLSSHIANVER NWRDPDQTDGLGLSYLSSHIANVER VPFDAATLHTSTAMAAQHGMDDDGTGQK VPVDPATYGQFYGGDSYIILYNYR	DPDQTDGLGLSYLSSHIANVER VPFDAATLHTSTAMAAQHGMDDDGTGQK DPDQTDGLGLSYLSSHIANVER VPFDAATLHTSTAMAAQHGMDDDGTGQK	11	16	11	5	0	2
COL11A1	Collagen; type XI; alpha 1; isoform CRA_c	D3DT72_HUMAN	50Step_Domain_p200.0_to_250.0	200	250	50.0 AA STEP	50	23	10	9	7	11	5	0.12	0	14	8	ILDEEVFEGDIQQFLITGDPK ILDEEVFEGDIQQFLITGDPK AAQAQEPQIDEK AIVDTNGITVFGTR ILDEEVFEGDIQQFLITGDPK	AAQAQEPQIDEK AAQAQEPQIDEKK AIVDTNGITVFGTR ILDEEVFEGDIQQFLITGDPK AAQAQEPQIDEK AAQAQEPQIDEKK AIVDTNGITVFGTR ILDEEVFEGDIQQFLITGDPK AAQAQEPQIDEK AAQAQEPQIDEKK AIVDTNGITVFGTR ILDEEVFEGDIQQFLITGDPK	2	6	9	12	19	10
ORM2	Alpha-1-acid glycoprotein 2	A1AG2_HUMAN	50Step_Domain_p100.0_to_150.0	100	150	50.0 AA STEP	50	13	14	13	0	0	0	0.26	0	13	0	EHVAHLLFLR NWGLSFYADKPETTK TLMFGSYLDDEK EHVAHLLFLR NWGLSFYADKPETTK TLMFGSYLDDEK EHVAHLLFLR NWGLSFYADKPETTK TLMFGSYLDDEK		26	24	6	0	0	0
ORM2	Alpha-1-acid glycoprotein 2	A1AG2_HUMAN	50Step_Domain_p150.0_to_200.0	150	200	50.0 AA STEP	50	9	6	9	0	0	0	0.16	0	8	0	NWGLSFYADKPETTK SDVMYTDWK NWGLSFYADKPETTK SDVMYTDWK NWGLSFYADKPETTK SDVMYTDWK		17	10	4	0	0	0
CHADL	Chondroadherin-like protein	CHADL_HUMAN	50Step_Domain_p100.0_to_150.0	100	150	50.0 AA STEP	50	0	0	0	3	2	5	-0.06	0	0	3		ELPQEALDGLGSLR ELPQEALDGLGSLR ELPQEALDGLGSLR	0	0	0	5	3	3
CHADL	Chondroadherin-like protein	CHADL_HUMAN	50Step_Domain_p450.0_to_500.0	450	500	50.0 AA STEP	50	3	3	2	0	1	0	0.06	0	3	0	LGYLYLER LGYLYLER LGYLYLER	LGYLYLER	1	1	1	0	1	0
CHADL	Chondroadherin-like protein	CHADL_HUMAN	50Step_Domain_p500.0_to_550.0	500	550	50.0 AA STEP	50	3	5	2	1	2	0	0.04	0	3	1	LGYLYLER FLQVPGAALR LGYLYLER LGYLYLER	FLQVPGAALR FLQVPGAALR LAPGDLGR LGYLYLER	1	2	1	1	3	0
CHADL	Chondroadherin-like protein	CHADL_HUMAN	50Step_Domain_p550.0_to_600.0	550	600	50.0 AA STEP	50	5	3	4	1	2	2	0.04	0	4	2	ITEVSLGALGPAR ITEVSLGALGPAR ITEVSLGALGPAR	ITEVSLGALGPAR EVPTGALEGLPALLELQLSGNPLR ITEVSLGALGPAR ITEVSLGALGPAR	2	1	2	2	4	1
ITIH6	Inter-alpha-trypsin inhibitor heavy chain H6	ITIH6_HUMAN	50Step_Domain_p450.0_to_500.0	450	500	50.0 AA STEP	50	2	0	2	0	0	0	0.02	0	1	0	IYEDTDAALQLK GLYEEISMPLLADVR IYEDTDAALQLK		2	0	3	0	0	0
SIL1	SIL1-like protein endoplasmic reticulum chaperone isoform 1	A0A0S2Z6B4_HUMAN	50Step_Domain_p300.0_to_350.0	300	350	50.0 AA STEP	50	2	2	0	0	0	0	0.02	0	1	0	GTEVLAVR MFAEEEAELTQEMSPEK GTEVLAVR VVTLLYDLVTEK		3	2	0	0	0	0
SIL1	Nucleotide exchange factor SIL1	SIL1_HUMAN	50Step_Domain_p300.0_to_350.0	300	350	50.0 AA STEP	50	2	2	0	0	0	0	0.02	0	1	0	GTEVLAVR MFAEEEAELTQEMSPEK GTEVLAVR VVTLLYDLVTEK		3	2	0	0	0	0
LRP1	Prolow-density lipoprotein receptor-related protein 1	LRP1_HUMAN	50Step_Domain_p300.0_to_350.0	300	350	50.0 AA STEP	50	1	0	0	0	3	4	-0.04	0	0	2	VFFTDYGQIPK	NGDTCVTLLDLELYNPK NGDTCVTLLDLELYNPK VFFTDYGQIPK	1	0	0	0	1	2
CFH	Complement factor H	CFAH_HUMAN	80Step_Domain_p0_to_80	0	80	80.0 AA STEP	80	10	6	22	10	28	28	-0.1125	0.0016	13	22	GEWVALNPLR NTEILTGSWSDQTYPEGTQAIYK RNTEILTGSWSDQTYPEGTQAIYK GEWVALNPLR NTEILTGSWSDQTYPEGTQAIYK GEWVALNPLR NTEILTGSWSDQTYPEGTQAIYK	GEWVALNPLR NTEILTGSWSDQTYPEGTQAIYK GEWVALNPLR NTEILTGSWSDQTYPEGTQAIYK GEWVALNPLR NTEILTGSWSDQTYPEGTQAIYK	19	7	9	2	4	6
CFH	Complement factor H	CFAH_HUMAN	80Step_Domain_p80.0_to_160.0	80	160	80.0 AA STEP	80	6	2	0	0	0	0	0.0375	1	3	0	AVYTCNEGYQLLGEINYR IVSSAMEPDR IVSSAMEPDREYHFGQAVR IVSSAMEPDREYHFGQAVR		11	2	0	0	0	0
CFH	Complement factor H	CFAH_HUMAN	80Step_Domain_p160.0_to_240.0	160	240	80.0 AA STEP	80	6	5	2	5	0	5	0.0125	1	4	3	CNMGYEYSER EYHFGQAVR IVSSAMEPDR IVSSAMEPDREYHFGQAVR IVSSAMEPDREYHFGQAVR SPDVINGSPISQK SPDVINGSPISQK	SPDVINGSPISQK SPDVINGSPISQK	11	5	1	1	0	1
CFH	Complement factor H	CFAH_HUMAN	80Step_Domain_p240.0_to_320.0	240	320	80.0 AA STEP	80	1	0	0	0	0	0	0	1	0	0	CNMGYEYSER		1	0	0	0	0	0
CFH	Complement factor H	CFAH_HUMAN	80Step_Domain_p320.0_to_400.0	320	400	80.0 AA STEP	80	0	0	0	0	0	0	0	1	0	0			0	0	0	0	0	0
CFH	Complement factor H	CFAH_HUMAN	80Step_Domain_p400.0_to_480.0	400	480	80.0 AA STEP	80	8	7	2	5	0	0	0.05	1	6	2	AQTTVTCMENGWSPTPR AQTTVTCMENGWSPTPR AQTTVTCMENGWSPTPR	AQTTVTCMENGWSPTPR	15	8	1	1	0	0
CFH	Complement factor H	CFAH_HUMAN	80Step_Domain_p480.0_to_560.0	480	560	80.0 AA STEP	80	0	0	0	0	0	0	0	1	0	0			0	0	0	0	0	0
CFH	Complement factor H	CFAH_HUMAN	80Step_Domain_p560.0_to_640.0	560	640	80.0 AA STEP	80	5	5	2	5	0	0	0.025	1	4	2	EQVQSCGPPPELLNGNVK IDVHLVPDR IDVHLVPDRK IDVHLVPDR IDVHLVPDRK IDVHLVPDR	IDVHLVPDR	10	6	1	1	0	0
CFH	Complement factor H	CFAH_HUMAN	80Step_Domain_p640.0_to_720.0	640	720	80.0 AA STEP	80	2	0	0	0	0	0	0.0125	1	1	0	EQVQSCGPPPELLNGNVK		4	0	0	0	0	0
CFH	Complement factor H	CFAH_HUMAN	80Step_Domain_p720.0_to_800.0	720	800	80.0 AA STEP	80	5	11	7	0	0	0	0.1	0.024	8	0	EGWIHTVCINGR SSNLIILEEHLK EGWIHTVCINGR SSNLIILEEHLK SSNLIILEEHLK		9	12	3	0	0	0
CFH	Complement factor H	CFAH_HUMAN	80Step_Domain_p800.0_to_880.0	800	880	80.0 AA STEP	80	0	0	0	0	0	0	0	1	0	0			0	0	0	0	0	0
CFH	Complement factor H	CFAH_HUMAN	80Step_Domain_p880.0_to_960.0	880	960	80.0 AA STEP	80	3	2	0	0	0	0	0.025	1	2	0	SPPEISHGVVAHMSDSYQYGEEVTYK SPPEISHGVVAHMSDSYQYGEEVTYK		6	2	0	0	0	0
CFH	Complement factor H	CFAH_HUMAN	80Step_Domain_p960.0_to_1040.0	960	1040	80.0 AA STEP	80	0	0	0	0	0	0	0	1	0	0			0	0	0	0	0	0
CFH	Complement factor H	CFAH_HUMAN	80Step_Domain_p1040.0_to_1120.0	1040	1120	80.0 AA STEP	80	0	0	0	0	0	0	0	1	0	0			0	0	0	0	0	0
CFH	Complement factor H	CFAH_HUMAN	80Step_Domain_p1120.0_to_1200.0	1120	1200	80.0 AA STEP	80	3	5	5	16	14	9	-0.1125	0.0064	4	13	EIMENYNIALR EIMENYNIALR EIMENYNIALR	EIMENYNIALR EIMENYNIALR EIMENYNIALR	6	6	2	3	2	2
CFH	Complement factor H	CFAH_HUMAN	80Step_Domain_p1200.0_to_1231.0	1200	1231	80.0 AA STEP	31	0	0	0	0	0	0	0	1	0	0			0	0	0	0	0	0
CFH	Complement factor H	CFAH_HUMAN	100Step_Domain_p0_to_100	0	100	100.0 AA STEP	100	10	6	22	10	28	28	-0.09	0.0078	13	22	GEWVALNPLR NTEILTGSWSDQTYPEGTQAIYK RNTEILTGSWSDQTYPEGTQAIYK GEWVALNPLR NTEILTGSWSDQTYPEGTQAIYK GEWVALNPLR NTEILTGSWSDQTYPEGTQAIYK	GEWVALNPLR NTEILTGSWSDQTYPEGTQAIYK GEWVALNPLR NTEILTGSWSDQTYPEGTQAIYK GEWVALNPLR NTEILTGSWSDQTYPEGTQAIYK	19	7	9	2	4	6
CFH	Complement factor H	CFAH_HUMAN	100Step_Domain_p100.0_to_200.0	100	200	100.0 AA STEP	100	6	2	0	0	0	0	0.03	1	3	0	AVYTCNEGYQLLGEINYR EYHFGQAVR IVSSAMEPDR IVSSAMEPDREYHFGQAVR IVSSAMEPDREYHFGQAVR		12	2	0	0	0	0
CFH	Complement factor H	CFAH_HUMAN	100Step_Domain_p200.0_to_300.0	200	300	100.0 AA STEP	100	1	3	2	5	0	5	-0.01	1	2	3	CNMGYEYSER SPDVINGSPISQK SPDVINGSPISQK	SPDVINGSPISQK SPDVINGSPISQK	1	3	1	1	0	1
CFH	Complement factor H	CFAH_HUMAN	100Step_Domain_p300.0_to_400.0	300	400	100.0 AA STEP	100	0	0	0	0	0	0	0	1	0	0			0	0	0	0	0	0
CFH	Complement factor H	CFAH_HUMAN	100Step_Domain_p400.0_to_500.0	400	500	100.0 AA STEP	100	8	7	2	5	0	0	0.04	1	6	2	AQTTVTCMENGWSPTPR AQTTVTCMENGWSPTPR AQTTVTCMENGWSPTPR	AQTTVTCMENGWSPTPR	15	8	1	1	0	0
CFH	Complement factor H	CFAH_HUMAN	100Step_Domain_p500.0_to_600.0	500	600	100.0 AA STEP	100	3	5	2	5	0	0	0.01	1	3	2	IDVHLVPDR IDVHLVPDRK IDVHLVPDR IDVHLVPDRK IDVHLVPDR	IDVHLVPDR	6	6	1	1	0	0
CFH	Complement factor H	CFAH_HUMAN	100Step_Domain_p600.0_to_700.0	600	700	100.0 AA STEP	100	2	0	0	0	0	0	0.01	1	1	0	EQVQSCGPPPELLNGNVK		4	0	0	0	0	0
CFH	Complement factor H	CFAH_HUMAN	100Step_Domain_p700.0_to_800.0	700	800	100.0 AA STEP	100	5	11	7	0	0	0	0.08	0.052	8	0	EGWIHTVCINGR SSNLIILEEHLK EGWIHTVCINGR SSNLIILEEHLK SSNLIILEEHLK		9	12	3	0	0	0
CFH	Complement factor H	CFAH_HUMAN	100Step_Domain_p800.0_to_900.0	800	900	100.0 AA STEP	100	0	0	0	0	0	0	0	1	0	0			0	0	0	0	0	0
CFH	Complement factor H	CFAH_HUMAN	100Step_Domain_p900.0_to_1000.0	900	1000	100.0 AA STEP	100	3	2	0	0	0	0	0.02	1	2	0	SPPEISHGVVAHMSDSYQYGEEVTYK SPPEISHGVVAHMSDSYQYGEEVTYK		6	2	0	0	0	0
CFH	Complement factor H	CFAH_HUMAN	100Step_Domain_p1000.0_to_1100.0	1000	1100	100.0 AA STEP	100	0	0	0	0	0	0	0	1	0	0			0	0	0	0	0	0
CFH	Complement factor H	CFAH_HUMAN	100Step_Domain_p1100.0_to_1200.0	1100	1200	100.0 AA STEP	100	3	5	5	16	14	9	-0.09	0.0169	4	13	EIMENYNIALR EIMENYNIALR EIMENYNIALR	EIMENYNIALR EIMENYNIALR EIMENYNIALR	6	6	2	3	2	2
CFH	Complement factor H	CFAH_HUMAN	100Step_Domain_p1200.0_to_1231.0	1200	1231	100.0 AA STEP	31	0	0	0	0	0	0	0	1	0	0			0	0	0	0	0	0
DCN	Decorin	PGS2_HUMAN	LRR 1	73	93	REPEAT	20	58	68	45	47	54	35	0.6	0.0972	57	45	DLPPDTTLLDLQNNK ITEIKDGDFK VVQCSDLGLDK DLPPDTTLLDLQNNK ITEIKDGDFK VVQCSDLGLDK DLPPDTTLLDLQNNK ITEIKDGDFK VVQCSDLGLDK	DLPPDTTLLDLQNNK ITEIKDGDFK VPKDLPPDTTLLDLQNNK VVQCSDLGLDK DLPPDTTLLDLQNNK ITEIKDGDFK VVQCSDLGLDK DLPPDTTLLDLQNNK ITEIKDGDFK VVQCSDLGLDK	35	48	63	38	39	36
DCN	Decorin	PGS2_HUMAN	LRR 2	94	117	REPEAT	23	42	31	24	22	33	37	0.0434783	1	32	31	ITEIKDGDFK NLHALILVNNK ITEIKDGDFK NLHALILVNNK ITEIKDGDFK NLHALILVNNK	DGDFKNLK ITEIKDGDFK NLHALILVNNK ITEIKDGDFK NLHALILVNNK ITEIKDGDFK NLHALILVNNK	25	22	33	18	24	38
DCN	Decorin	PGS2_HUMAN	LRR 3	118	141	REPEAT	23	8	4	6	15	15	14	-0.391304	0.5472	6	15	VSPGAFTPLVK VSPGAFTPLVK VSPGAFTPLVK	VSPGAFTPLVK VSPGAFTPLVK VSPGAFTPLVK	5	3	8	12	11	14
DCN	Decorin	PGS2_HUMAN	LRR 4	142	162	REPEAT	20	0	3	1	2	0	0	0	1	1	1	AHENEITK AHENEITK	AHENEITK	0	2	2	2	0	0
DCN	Decorin	PGS2_HUMAN	LRR 5	163	186	REPEAT	23	3	6	4	4	0	3	0.0869565	1	4	2	VTFNGLNQMIVIELGTNPLK AHENEITK VTFNGLNQMIVIELGTNPLK AHENEITK VTFNGLNQMIVIELGTNPLK	AHENEITK VTFNGLNQMIVIELGTNPLK VTFNGLNQMIVIELGTNPLK	2	4	5	3	0	3
DCN	Decorin	PGS2_HUMAN	LRR 6	187	212	REPEAT	25	13	4	10	12	4	10	0	1	9	9	SSGIENGAFQGMK SSGIENGAFQGMK SSGIENGAFQGMK	SSGIENGAFQGMK SSGIENGAFQGMK SSGIENGAFQGMK	8	3	14	10	3	10
DCN	Decorin	PGS2_HUMAN	LRR 7	213	233	REPEAT	20	0	0	0	0	0	0	0	1	0	0			0	0	0	0	0	0
DCN	Decorin	PGS2_HUMAN	LRR 8	234	257	REPEAT	23	0	0	0	0	0	0	0	1	0	0			0	0	0	0	0	0
DCN	Decorin	PGS2_HUMAN	LRR 9	258	281	REPEAT	23	0	0	1	15	14	15	-0.652174	0.0168	0	15	ELHLDNNK	ELHLDNNK ELHLDNNK ELHLDNNK	0	0	2	12	10	15
DCN	Decorin	PGS2_HUMAN	LRR 10	282	304	REPEAT	22	2	8	20	1	3	5	0.318182	1	10	3	YIQVVYLHNNNISVVGSSDFCPPGHNTK VPGGLAEHK YIQVVYLHNNNISVVGSSDFCPPGHNTK VPGGLAEHK YIQVVYLHNNNISVVGSSDFCPPGHNTK	VPGGLAEHK VPGGLAEHK VPGGLAEHK	1	6	28	1	2	5
DCN	Decorin	PGS2_HUMAN	LRR 11	305	334	REPEAT	29	10	16	31	6	6	3	0.482759	0.0204	19	5	ASYSGVSLFSNPVQYWEIQPSTFR YIQVVYLHNNNISVVGSSDFCPPGHNTK ASYSGVSLFSNPVQYWEIQPSTFR YIQVVYLHNNNISVVGSSDFCPPGHNTK ASYSGVSLFSNPVQYWEIQPSTFR YIQVVYLHNNNISVVGSSDFCPPGHNTK	ASYSGVSLFSNPVQYWEIQPSTFR ASYSGVSLFSNPVQYWEIQPSTFR ASYSGVSLFSNPVQYWEIQPSTFR	6	11	43	5	4	3
DCN	Decorin	PGS2_HUMAN	LRR 12	335	359	REPEAT	24	8	10	14	6	6	3	0.25	1	11	5	ASYSGVSLFSNPVQYWEIQPSTFR ASYSGVSLFSNPVQYWEIQPSTFR ASYSGVSLFSNPVQYWEIQPSTFR SAIQLGNYK	ASYSGVSLFSNPVQYWEIQPSTFR ASYSGVSLFSNPVQYWEIQPSTFR ASYSGVSLFSNPVQYWEIQPSTFR	5	7	19	5	4	3
LRP1	Prolow-density lipoprotein receptor-related protein 1	LRP1_HUMAN	50Step_Domain_p2250.0_to_2300.0	2250	2300	50.0 AA STEP	50	1	2	2	0	0	0	0.04	0	2	0	ITIVENVGSVEGLAYHR ITIVENVGSVEGLAYHR IFFSDIHFGNIQQINDDGSR ITIVENVGSVEGLAYHR		1	1	4	0	0	0
LRP1	Prolow-density lipoprotein receptor-related protein 1	LRP1_HUMAN	50Step_Domain_p3200.0_to_3250.0	3200	3250	50.0 AA STEP	50	0	0	1	2	3	4	-0.06	0	0	3	EDYIEFASLDGSNR	EDYIEFASLDGSNR EDYIEFASLDGSNR EDYIEFASLDGSNR	0	0	1	1	1	2
MMP2	72 kDa type IV collagenase	MMP2_HUMAN	50Step_Domain_p100.0_to_150.0	100	150	50.0 AA STEP	50	2	4	4	0	0	0	0.06	0	3	0	AFQVWSDVTPLR IIGYTPDLDPETVDDAFAR AFQVWSDVTPLR IIGYTPDLDPETVDDAFAR IIGYTPDLDPETVDDAFAR		4	4	1	0	0	0
MMP2	72 kDa type IV collagenase	MMP2_HUMAN	50Step_Domain_p500.0_to_550.0	500	550	50.0 AA STEP	50	2	2	4	0	0	0	0.06	0	3	0	IDAVYEAPQEEK AVFFAGNEYWIYSASTLER IDAVYEAPQEEK IDAVYEAPQEEK		3	2	1	0	0	0
CFI	Complement factor I	CFAI_HUMAN	50Step_Domain_p0_to_50	0	50	50.0 AA STEP	50	4	2	6	0	0	0	0.08	0	4	0	VTYTSQEDLVEK VTYTSQEDLVEKK VTYTSQEDLVEK VTYTSQEDLVEKK VTYTSQEDLVEK		8	3	1	0	0	0
CFI	Complement factor I	CFAI_HUMAN	50Step_Domain_p400.0_to_450.0	400	450	50.0 AA STEP	50	2	4	6	0	0	0	0.08	0	4	0	IVIEYVDR YQIWTTVVDWIHPDLK IIFHENYNAGTYQNDIALIEMK IVIEYVDR YQIWTTVVDWIHPDLK IVIEYVDR		4	6	1	0	0	0
SERPING1	Plasma protease C1 inhibitor	IC1_HUMAN	50Step_Domain_p200.0_to_250.0	200	250	50.0 AA STEP	50	11	11	8	26	26	18	-0.26	0	10	23	GVTSVSQIFHSPDLAIR TNLESILSYPK GVTSVSQIFHSPDLAIR TNLESILSYPK GVTSVSQIFHSPDLAIR TNLESILSYPK	GVTSVSQIFHSPDLAIR TNLESILSYPK GVTSVSQIFHSPDLAIR TNLESILSYPK GVTSVSQIFHSPDLAIR TNLESILSYPK	13	11	6	32	27	14
HPX	Hemopexin	HEMO_HUMAN	50Step_Domain_p100.0_to_150.0	100	150	50.0 AA STEP	50	17	22	19	0	0	0	0.38	0	19	0	NFPSPVDAAFR QGHNSVFLIK VWVYPPEK NFPSPVDAAFR QGHNSVFLIK VWVYPPEK NFPSPVDAAFR VWVYPPEK		33	26	6	0	0	0
DCN	Decorin	PGS2_HUMAN	80Step_Domain_p0_to_80	0	80	80.0 AA STEP	80	35	48	34	37	37	25	0.075	1	39	33	DLPPDTTLLDLQNNK VVQCSDLGLDK DLPPDTTLLDLQNNK VVQCSDLGLDK DFEPSLGPVCPFR DLPPDTTLLDLQNNK VVQCSDLGLDK	DLPPDTTLLDLQNNK VPKDLPPDTTLLDLQNNK VVQCSDLGLDK DLPPDTTLLDLQNNK VVQCSDLGLDK DLPPDTTLLDLQNNK VVQCSDLGLDK	21	34	47	30	27	26
DCN	Decorin	PGS2_HUMAN	80Step_Domain_p80.0_to_160.0	80	160	80.0 AA STEP	80	82	83	59	75	84	74	-0.0375	1	75	78	DLPPDTTLLDLQNNK ITEIKDGDFK NLHALILVNNK VSPGAFTPLVK AHENEITK DLPPDTTLLDLQNNK ITEIKDGDFK NLHALILVNNK VSPGAFTPLVK AHENEITK DLPPDTTLLDLQNNK ITEIKDGDFK NLHALILVNNK VSPGAFTPLVK	AHENEITK DGDFKNLK DLPPDTTLLDLQNNK ITEIKDGDFK NLHALILVNNK VPKDLPPDTTLLDLQNNK VSPGAFTPLVK DLPPDTTLLDLQNNK ITEIKDGDFK NLHALILVNNK VSPGAFTPLVK DLPPDTTLLDLQNNK ITEIKDGDFK NLHALILVNNK VSPGAFTPLVK	49	59	83	61	61	76
DCN	Decorin	PGS2_HUMAN	80Step_Domain_p160.0_to_240.0	160	240	80.0 AA STEP	80	17	10	14	16	4	13	0.0375	1	14	11	SSGIENGAFQGMK VTFNGLNQMIVIELGTNPLK AHENEITK SSGIENGAFQGMK VTFNGLNQMIVIELGTNPLK AHENEITK SSGIENGAFQGMK VTFNGLNQMIVIELGTNPLK	AHENEITK SSGIENGAFQGMK VTFNGLNQMIVIELGTNPLK SSGIENGAFQGMK SSGIENGAFQGMK VTFNGLNQMIVIELGTNPLK	10	7	19	13	3	13
DCN	Decorin	PGS2_HUMAN	80Step_Domain_p240.0_to_320.0	240	320	80.0 AA STEP	80	2	8	21	16	17	20	-0.1	1	10	18	YIQVVYLHNNNISVVGSSDFCPPGHNTK VPGGLAEHK YIQVVYLHNNNISVVGSSDFCPPGHNTK ELHLDNNK VPGGLAEHK YIQVVYLHNNNISVVGSSDFCPPGHNTK	ELHLDNNK VPGGLAEHK ELHLDNNK VPGGLAEHK ELHLDNNK VPGGLAEHK	1	6	30	13	12	20
DCN	Decorin	PGS2_HUMAN	80Step_Domain_p320.0_to_359.0	320	359	80.0 AA STEP	39	8	10	14	6	6	3	0.153846	1	11	5	ASYSGVSLFSNPVQYWEIQPSTFR ASYSGVSLFSNPVQYWEIQPSTFR ASYSGVSLFSNPVQYWEIQPSTFR SAIQLGNYK	ASYSGVSLFSNPVQYWEIQPSTFR ASYSGVSLFSNPVQYWEIQPSTFR ASYSGVSLFSNPVQYWEIQPSTFR	5	7	19	5	4	3
DCN	Decorin	PGS2_HUMAN	100Step_Domain_p0_to_100	0	100	100.0 AA STEP	100	58	68	46	49	54	35	0.11	0.5824	57	46	DLPPDTTLLDLQNNK ITEIKDGDFK VVQCSDLGLDK DLPPDTTLLDLQNNK ITEIKDGDFK VVQCSDLGLDK DFEPSLGPVCPFR DLPPDTTLLDLQNNK ITEIKDGDFK VVQCSDLGLDK	DGDFKNLK DLPPDTTLLDLQNNK ITEIKDGDFK VPKDLPPDTTLLDLQNNK VVQCSDLGLDK DLPPDTTLLDLQNNK ITEIKDGDFK VVQCSDLGLDK DLPPDTTLLDLQNNK ITEIKDGDFK VVQCSDLGLDK	35	48	64	40	39	36
DCN	Decorin	PGS2_HUMAN	100Step_Domain_p100.0_to_200.0	100	200	100.0 AA STEP	100	67	45	43	53	52	64	-0.04	1	52	56	ITEIKDGDFK NLHALILVNNK SSGIENGAFQGMK VSPGAFTPLVK VTFNGLNQMIVIELGTNPLK AHENEITK ITEIKDGDFK NLHALILVNNK SSGIENGAFQGMK VSPGAFTPLVK VTFNGLNQMIVIELGTNPLK AHENEITK ITEIKDGDFK NLHALILVNNK SSGIENGAFQGMK VSPGAFTPLVK VTFNGLNQMIVIELGTNPLK	AHENEITK DGDFKNLK ITEIKDGDFK NLHALILVNNK SSGIENGAFQGMK VSPGAFTPLVK VTFNGLNQMIVIELGTNPLK ITEIKDGDFK NLHALILVNNK SSGIENGAFQGMK VSPGAFTPLVK ITEIKDGDFK NLHALILVNNK SSGIENGAFQGMK VSPGAFTPLVK VTFNGLNQMIVIELGTNPLK	40	32	60	43	38	65
DCN	Decorin	PGS2_HUMAN	100Step_Domain_p200.0_to_300.0	200	300	100.0 AA STEP	100	2	8	21	16	17	20	-0.08	1	10	18	YIQVVYLHNNNISVVGSSDFCPPGHNTK VPGGLAEHK YIQVVYLHNNNISVVGSSDFCPPGHNTK ELHLDNNK VPGGLAEHK YIQVVYLHNNNISVVGSSDFCPPGHNTK	ELHLDNNK VPGGLAEHK ELHLDNNK VPGGLAEHK ELHLDNNK VPGGLAEHK	1	6	30	13	12	20
DCN	Decorin	PGS2_HUMAN	100Step_Domain_p300.0_to_359.0	300	359	100.0 AA STEP	59	10	16	31	6	6	3	0.237288	0.3084	19	5	ASYSGVSLFSNPVQYWEIQPSTFR YIQVVYLHNNNISVVGSSDFCPPGHNTK ASYSGVSLFSNPVQYWEIQPSTFR YIQVVYLHNNNISVVGSSDFCPPGHNTK ASYSGVSLFSNPVQYWEIQPSTFR SAIQLGNYK YIQVVYLHNNNISVVGSSDFCPPGHNTK	ASYSGVSLFSNPVQYWEIQPSTFR ASYSGVSLFSNPVQYWEIQPSTFR ASYSGVSLFSNPVQYWEIQPSTFR	6	11	44	5	4	3
COL5A1	Collagen alpha-1(V) chain	CO5A1_HUMAN	Nonhelical region	231	443	REGIONS	212	0	0	0	0	0	0	0	1	0	0			0	0	0	0	0	0
COL5A1	Collagen alpha-1(V) chain	CO5A1_HUMAN	Interrupted collagenous region	444	558	REGIONS	114	0	0	0	0	0	0	0	1	0	0			0	0	0	0	0	0
COL5A1	Collagen alpha-1(V) chain	CO5A1_HUMAN	Triple-helical region	559	1570	REGIONS	1011	0	0	0	1	1	1	-0.00098912	0	0	1		GEAGLEGPPGK GEAGLEGPPGK GEAGLEGPPGK	0	0	0	1	1	2
COL5A1	Collagen alpha-1(V) chain	CO5A1_HUMAN	Nonhelical region_1571_1605	1571	1605	REGIONS	34	0	0	0	0	0	0	0	1	0	0			0	0	0	0	0	0
COL5A1	Collagen alpha-1(V) chain	CO5A1_HUMAN	Laminin G-like	72	244	DOMAINS	172	0	2	4	2	1	0	0.00581395	1	2	1	ILDEEVFEGDIQQLLFVSDHR ILDEEVFEGDIQQLLFVSDHR SPVFLYEDHTGKPGPEDYPLFR	DAQLSAPTK QLYPASAFPEDFSILTTVK DAQLSAPTK	0	1	3	4	1	0
COL5A1	Collagen alpha-1(V) chain	CO5A1_HUMAN	Fibrillar collagen NC1	1609	1837	DOMAINS	228	18	16	11	15	16	16	-0.00438596	1	15	16	FLGSNDEEMSYDNNPYIR TVLEIDTPK FLGSNDEEMSYDNNPYIR LLSYVDAEGNPVGVVQMTFLR TVLEIDTPK VEQVPIVDIMFNDFGEASQK FLGSNDEEMSYDNNPYIR LLSYVDAEGNPVGVVQMTFLR VEQVPIVDIMFNDFGEASQK	ENPGSWFSEFK FLGSNDEEMSYDNNPYIR LLSYVDAEGNPVGVVQMTFLR TVLEIDTPK VEQVPIVDIMFNDFGEASQK ENPGSWFSEFK FLGSNDEEMSYDNNPYIR LLSYVDAEGNPVGVVQMTFLR RPLGTQQNPAR TVLEIDTPK VEQVPIVDIMFNDFGEASQK ENPGSWFSEFK FLGSNDEEMSYDNNPYIR LLSYVDAEGNPVGVVQMTFLR TVLEIDTPK VEQVPIVDIMFNDFGEASQK	3	10	8	27	22	22
HPX	Hemopexin	HEMO_HUMAN	50Step_Domain_p300.0_to_350.0	300	350	50.0 AA STEP	50	22	19	6	0	0	0	0.32	0	16	0	DGWHSWPIAHQWPQGPSAVDAAFSWEEK EVGTPHGIILDSVDAAFICPGSSR GGYTLVSGYPK DGWHSWPIAHQWPQGPSAVDAAFSWEEK GGYTLVSGYPK GGYTLVSGYPK		44	22	2	0	0	0
ACAN	Aggrecan core protein	PGCA_HUMAN	50Step_Domain_p100.0_to_150.0	100	150	50.0 AA STEP	50	59	115	122	88	61	65	0.56	0	99	71	VNSAYQDK VSLPNYPAIPSDATLEVQSLR VNSAYQDK VSLPNYPAIPSDATLEVQSLR CEVMHGIEDSEATLEVVVK VNSAYQDK VNSAYQDKVSLPNYPAIPSDATLEVQSLR VSLPNYPAIPSDATLEVQSLR	VNSAYQDK VSLPNYPAIPSDATLEVQSLR CEVMHGIEDSEATLEVVVK VNSAYQDK VSLPNYPAIPSDATLEVQSLR CEVMHGIEDSEATLEVVVK VNSAYQDK VSLPNYPAIPSDATLEVQSLR	28	74	186	132	91	94
N/A	Transthyretin	A6XGL1_HUMAN	50Step_Domain_p50.0_to_100.0	50	100	50.0 AA STEP	50	33	38	45	0	0	0	0.78	0	39	0	AADDTWEPFASGK GSPAINVAVHVFR KAADDTWEPFASGK TSESGELHGLTTEEEFVEGIYK AADDTWEPFASGK GSPAINVAVHVFR KAADDTWEPFASGK TSESGELHGLTTEEEFVEGIYK AADDTWEPFASGK TSESGELHGLTTEEEFVEGIYK		63	76	16	0	0	0
N/A	Transthyretin	A6XGL1_HUMAN	50Step_Domain_p150.0_to_184.0	150	184	50.0 AA STEP	34	26	21	14	0	0	0	0.588235	0	20	0	ALGISPFHEHAEVVFTANDSGPR YTIAALLSPYSYSTTAVVTNPK YTIAALLSPYSYSTTAVVTNPKE ALGISPFHEHAEVVFTANDSGPR YTIAALLSPYSYSTTAVVTNPK YTIAALLSPYSYSTTAVVTNPKE ALGISPFHEHAEVVFTANDSGPR YTIAALLSPYSYSTTAVVTNPK		50	41	5	0	0	0
HEL111	Transthyretin	E9KL36_HUMAN	50Step_Domain_p50.0_to_100.0	50	100	50.0 AA STEP	50	33	38	45	0	0	0	0.78	0	39	0	AADDTWEPFASGK GSPAINVAVHVFR KAADDTWEPFASGK TSESGELHGLTTEEEFVEGIYK AADDTWEPFASGK GSPAINVAVHVFR KAADDTWEPFASGK TSESGELHGLTTEEEFVEGIYK AADDTWEPFASGK TSESGELHGLTTEEEFVEGIYK		63	76	16	0	0	0
HEL111	Transthyretin	E9KL36_HUMAN	50Step_Domain_p100.0_to_147.0	100	147	50.0 AA STEP	47	26	21	14	0	0	0	0.425532	0	20	0	ALGISPFHEHAEVVFTANDSGPR YTIAALLSPYSYSTTAVVTNPK YTIAALLSPYSYSTTAVVTNPKE ALGISPFHEHAEVVFTANDSGPR YTIAALLSPYSYSTTAVVTNPK YTIAALLSPYSYSTTAVVTNPKE ALGISPFHEHAEVVFTANDSGPR YTIAALLSPYSYSTTAVVTNPK		50	41	5	0	0	0
TTR	Transthyretin	TTHY_HUMAN	50Step_Domain_p50.0_to_100.0	50	100	50.0 AA STEP	50	33	38	45	0	0	0	0.78	0	39	0	AADDTWEPFASGK GSPAINVAVHVFR KAADDTWEPFASGK TSESGELHGLTTEEEFVEGIYK AADDTWEPFASGK GSPAINVAVHVFR KAADDTWEPFASGK TSESGELHGLTTEEEFVEGIYK AADDTWEPFASGK TSESGELHGLTTEEEFVEGIYK		63	76	16	0	0	0
TTR	Transthyretin	TTHY_HUMAN	50Step_Domain_p100.0_to_147.0	100	147	50.0 AA STEP	47	26	21	14	0	0	0	0.425532	0	20	0	ALGISPFHEHAEVVFTANDSGPR YTIAALLSPYSYSTTAVVTNPK YTIAALLSPYSYSTTAVVTNPKE ALGISPFHEHAEVVFTANDSGPR YTIAALLSPYSYSTTAVVTNPK YTIAALLSPYSYSTTAVVTNPKE ALGISPFHEHAEVVFTANDSGPR YTIAALLSPYSYSTTAVVTNPK		50	41	5	0	0	0
AHSG	Alpha-2-HS-glycoprotein	FETUA_HUMAN	50Step_Domain_p300.0_to_350.0	300	350	50.0 AA STEP	50	11	11	0	0	0	0	0.14	0	7	0	HTFMGVVSLGSPSGEVSHPR HTFMGVVSLGSPSGEVSHPR		22	17	0	0	0	0
AMBP	Protein AMBP	AMBP_HUMAN	50Step_Domain_p150.0_to_200.0	150	200	50.0 AA STEP	50	11	11	15	0	0	0	0.24	0	12	0	ETLLQDFR GECVPGEQEPEPILIPR VVAQGVGIPEDSIFTMADR ETLLQDFR VVAQGVGIPEDSIFTMADR ETLLQDFR VVAQGVGIPEDSIFTMADR		21	15	3	0	0	0
Meflin	Mesenchymal stromal cell-and fibroblast-expressing Linx paralogue	A0A146E5L3_HUMAN	50Step_Domain_p50.0_to_100.0	50	100	50.0 AA STEP	50	4	6	4	2	1	2	0.06	0	5	2	EVPLLQSLWLAHNEIR LPGLPEGAFR TVAAGALASLSHLK EVPLLQSLWLAHNEIR LPGLPEGAFR EVPLLQSLWLAHNEIR LPGLPEGAFR TVAAGALASLSHLK	LPGLPEGAFR LPGLPEGAFR LPGLPEGAFR	4	4	6	1	1	2
ISLR	Immunoglobulin superfamily containing leucine-rich repeat protein	ISLR_HUMAN	50Step_Domain_p50.0_to_100.0	50	100	50.0 AA STEP	50	4	6	4	2	1	2	0.06	0	5	2	EVPLLQSLWLAHNEIR LPGLPEGAFR TVAAGALASLSHLK EVPLLQSLWLAHNEIR LPGLPEGAFR EVPLLQSLWLAHNEIR LPGLPEGAFR TVAAGALASLSHLK	LPGLPEGAFR LPGLPEGAFR LPGLPEGAFR	4	4	6	1	1	2
LRG1	Leucine-rich alpha-2-glycoprotein	A2GL_HUMAN	50Step_Domain_p150.0_to_200.0	150	200	50.0 AA STEP	50	11	8	8	0	0	0	0.18	0	9	0	ALGHLDLSGNR ENQLEVLEVSWLHGLK TLDLGENQLETLPPDLLR ALGHLDLSGNR ENQLEVLEVSWLHGLK TLDLGENQLETLPPDLLR ALGHLDLSGNR		21	7	1	0	0	0
C9	Complement component C9	CO9_HUMAN	50Step_Domain_p150.0_to_200.0	150	200	50.0 AA STEP	50	11	6	7	0	0	0	0.16	0	8	0	DGNTLTYYR DRDGNTLTYYR DRVVEESELAR RPWNVASLIYETK TAGYGINILGMDPLSTPFDNEFYNGLCNR VVEESELAR DRVVEESELAR RPWNVASLIYETK TAGYGINILGMDPLSTPFDNEFYNGLCNR VVEESELAR DRDGNTLTYYR VVEESELAR		22	7	2	0	0	0
C9	Complement component C9	CO9_HUMAN	50Step_Domain_p200.0_to_250.0	200	250	50.0 AA STEP	50	8	8	4	0	0	0	0.14	0	7	0	RPWNVASLIYETK TEHYEEQIEAFK TSNFNAAISLK RPWNVASLIYETK TEHYEEQIEAFK TSNFNAAISLK TEHYEEQIEAFK		16	10	1	0	0	0
C9	Complement component C9	CO9_HUMAN	50Step_Domain_p300.0_to_350.0	300	350	50.0 AA STEP	50	5	9	4	0	0	0	0.12	0	6	0	DVVLTTTFVDDIK DVVLTTTFVDDIK NRDVVLTTTFVDDIK DVVLTTTFVDDIK		10	11	1	0	0	0
C9	Complement component C9	CO9_HUMAN	50Step_Domain_p450.0_to_500.0	450	500	50.0 AA STEP	50	7	8	15	0	0	0	0.2	0	10	0	AIEDYINEFSVR GTVIDVTDFVNWASSINDAPVLISQK LSPIYNLVPVK AIEDYINEFSVR GTVIDVTDFVNWASSINDAPVLISQK LSPIYNLVPVK AIEDYINEFSVR GTVIDVTDFVNWASSINDAPVLISQK		13	10	4	0	0	0
EMILIN1	EMILIN-1	EMIL1_HUMAN	50Step_Domain_p500.0_to_550.0	500	550	50.0 AA STEP	50	3	9	6	10	9	12	-0.08	0	6	10	QATLEGLQEVVGR VDAQDETAAEFTLR LVGSGLHTVEAAGEAR VDAQDETAAEFTLR VLDSEGQLR LVGSGLHTVEAAGEAR VDAQDETAAEFTLR VLDSEGQLR	LVGSGLHTVEAAGEAR VDAQDETAAEFTLR VLDSEGQLR LVGSGLHTVEAAGEAR VDAQDETAAEFTLR VLDSEGQLR LVGSGLHTVEAAGEAR QATLEGLQEVVGR VDAQDETAAEFTLR VLDSEGQLR	2	6	5	11	12	14
HHIPL2	HHIP-like protein 2	HIPL2_HUMAN	50Step_Domain_p250.0_to_300.0	250	300	50.0 AA STEP	50	6	7	5	3	3	3	0.06	0	6	3	LEQPFLDLK NIVLTTPWIGDER LEQPFLDLK NIVLTTPWIGDER LEQPFLDLK NIVLTTPWIGDER	LEQPFLDLK LEQPFLDLK LEQPFLDLK	2	3	6	5	4	4
N/A	cDNA FLJ61564; highly similar to Plexin domain-containing protein 2	B4E367_HUMAN	50Step_Domain_p50.0_to_100.0	50	100	50.0 AA STEP	50	0	0	0	3	3	3	-0.06	0	0	3		ASVGQDSPEPR ASVGQDSPEPR ASVGQDSPEPR	0	0	0	1	2	1
SERPINA4	Kallistatin	KAIN_HUMAN	50Step_Domain_p200.0_to_250.0	200	250	50.0 AA STEP	50	3	3	9	0	0	0	0.1	0	5	0	DFYVDENTTVR IVDLVSELK DFYVDENTTVR IVDLVSELK IVDLVSELKK DFYVDENTTVR IVDLVSELK		5	5	3	0	0	0
SERPINA4	Kallistatin	KAIN_HUMAN	50Step_Domain_p300.0_to_350.0	300	350	50.0 AA STEP	50	4	6	6	0	0	0	0.1	0	5	0	FSISGSYVLDQILPR LGFTDLFSK WADLSGITK FSISGSYVLDQILPR LGFTDLFSK WADLSGITK LGFTDLFSK		7	11	2	0	0	0
PLXDC2	Plexin domain-containing protein 2	PXDC2_HUMAN	50Step_Domain_p50.0_to_100.0	50	100	50.0 AA STEP	50	0	0	0	3	3	3	-0.06	0	0	3		ASVGQDSPEPR ASVGQDSPEPR ASVGQDSPEPR	0	0	0	1	2	1
N/A	cDNA; FLJ93695; highly similar to Homo sapiens serpin peptidase inhibitor; clade A (alpha-1 antiproteinase; antitrypsin); member 4 (SERPINA4); mRNA	B2R815_HUMAN	50Step_Domain_p200.0_to_250.0	200	250	50.0 AA STEP	50	3	3	9	0	0	0	0.1	0	5	0	DFYVDENTTVR IVDLVSELK DFYVDENTTVR IVDLVSELK IVDLVSELKK DFYVDENTTVR IVDLVSELK		5	5	3	0	0	0
N/A	cDNA; FLJ93695; highly similar to Homo sapiens serpin peptidase inhibitor; clade A (alpha-1 antiproteinase; antitrypsin); member 4 (SERPINA4); mRNA	B2R815_HUMAN	50Step_Domain_p300.0_to_350.0	300	350	50.0 AA STEP	50	4	6	6	0	0	0	0.1	0	5	0	FSISGSYVLDQILPR LGFTDLFSK WADLSGITK FSISGSYVLDQILPR LGFTDLFSK WADLSGITK LGFTDLFSK		7	11	2	0	0	0
PXDN	Peroxidasin homolog	PXDN_HUMAN	50Step_Domain_p650.0_to_700.0	650	700	50.0 AA STEP	50	1	0	1	4	3	1	-0.04	0	1	3	SPNDLLALFR SPNDLLALFR	DPYTVEQAR SPNDLLALFR DPYTVEQAR SPNDLLALFR	1	0	1	3	1	1
N/A	cDNA; FLJ94361; highly similar to Homo sapiens serine (or cysteine) proteinase inhibitor; clade A(alpha-1 antiproteinase; antitrypsin); member 6 (SERPINA6); mRNA	B2R9F2_HUMAN	50Step_Domain_p200.0_to_250.0	200	250	50.0 AA STEP	50	7	5	3	0	0	0	0.1	0	5	0	EENFYVDETTVVK GTWTQPFDLASTR EENFYVDETTVVK GTWTQPFDLASTR EENFYVDETTVVK GTWTQPFDLASTR		6	10	2	0	0	0
N/A	Albumin	F6KPG5_HUMAN	50Step_Domain_p300.0_to_350.0	300	350	50.0 AA STEP	50	102	81	52	27	0	13	1.3	0	78	13	ADLPSLAADFVESK DVFLGMFLYEYAR HPDYSVVLLLR LAKTYETTLEK RHPDYSVVLLLR ADLPSLAADFVESK DVFLGMFLYEYAR HPDYSVVLLLR LAKTYETTLEK RHPDYSVVLLLR DVFLGMFLYEYAR HPDYSVVLLLR RHPDYSVVLLLR	DVFLGMFLYEYAR DVFLGMFLYEYAR	196	139	21	3	0	1
SERPINA6	Corticosteroid-binding globulin	CBG_HUMAN	50Step_Domain_p200.0_to_250.0	200	250	50.0 AA STEP	50	7	5	3	0	0	0	0.1	0	5	0	EENFYVDETTVVK GTWTQPFDLASTR EENFYVDETTVVK GTWTQPFDLASTR EENFYVDETTVVK GTWTQPFDLASTR		6	10	2	0	0	0
THBS4	Thrombospondin-4	TSP4_HUMAN	50Step_Domain_p50.0_to_100.0	50	100	50.0 AA STEP	50	16	12	17	9	10	7	0.12	0	15	9	SSATIFGLYSSTDNSK YFEFTVMGR LNPGALLPVLTDPALNDLYVISTFK YFEFTVMGR LNPGALLPVLTDPALNDLYVISTFK SSATIFGLYSSTDNSK YFEFTVMGR	LNPGALLPVLTDPALNDLYVISTFK SSATIFGLYSSTDNSK LNPGALLPVLTDPALNDLYVISTFK SSATIFGLYSSTDNSK YFEFTVMGR LNPGALLPVLTDPALNDLYVISTFK SSATIFGLYSSTDNSK	2	2	5	4	7	14
THBS4	Thrombospondin-4	TSP4_HUMAN	50Step_Domain_p150.0_to_200.0	150	200	50.0 AA STEP	50	8	12	3	14	12	15	-0.12	0	8	14	AFAGPSQKPETIELR AFAGPSQKPETIELR KPQDFLEELK AFAGPSQKPETIELR	AFAGPSQKPETIELR KPQDFLEELK AFAGPSQKPETIELR KPQDFLEELK AFAGPSQKPETIELR KPQDFLEELK	1	2	1	6	9	28
THBS2	Thrombospondin-2	TSP2_HUMAN	50Step_Domain_p50.0_to_100.0	50	100	50.0 AA STEP	50	2	3	3	2	0	0	0.04	0	3	1	GPDPGVPAYR GTLLALEGPGLSQR EGFFLTAQLK GTLLALEGPGLSQR GPDPGVPAYR GTLLALEGPGLSQR	GPDPGVPAYR	3	3	4	1	0	0
THBS2	Thrombospondin-2	TSP2_HUMAN	50Step_Domain_p100.0_to_150.0	100	150	50.0 AA STEP	50	4	3	2	0	0	0	0.06	0	3	0	GTLLALEGPGLSQR HVVSLEDVGLADSQWK GTLLALEGPGLSQR HVVSLEDVGLADSQWK GTLLALEGPGLSQR HVVSLEDVGLADSQWK		5	3	3	0	0	0
THBS2	Thrombospondin-2	TSP2_HUMAN	50Step_Domain_p900.0_to_950.0	900	950	50.0 AA STEP	50	1	0	1	3	2	3	-0.04	0	1	3	LVFNPDQEDLDGDGR LVFNPDQEDLDGDGR	DDFDNDNIPDIDDVCPENNAISETDFR LVFNPDQEDLDGDGR LVFNPDQEDLDGDGR LVFNPDQEDLDGDGR	1	0	1	2	2	2
THBS2	Thrombospondin-2	TSP2_HUMAN	50Step_Domain_p1000.0_to_1050.0	1000	1050	50.0 AA STEP	50	1	0	0	2	2	3	-0.04	0	0	2	QVTQTYWEDQPTR	QVTQTYWEDQPTR QVTQTYWEDQPTR QVTQTYWEDQPTR	1	0	0	1	2	2
THBS2	Thrombospondin-2	TSP2_HUMAN	50Step_Domain_p1050.0_to_1100.0	1050	1100	50.0 AA STEP	50	2	1	0	3	3	3	-0.04	0	1	3	AYGYSGVSLK QVTQTYWEDQPTR AYGYSGVSLK	AYGYSGVSLK QVTQTYWEDQPTR AYGYSGVSLK QVTQTYWEDQPTR QVTQTYWEDQPTR	2	1	0	2	3	2
XYLT1	Xylosyltransferase 1	XYLT1_HUMAN	50Step_Domain_p300.0_to_350.0	300	350	50.0 AA STEP	50	0	2	1	4	3	8	-0.08	0	1	5	NVQWDEDSVEYMPANPVR NVQWDEDSVEYMPANPVR	NVQWDEDSVEYMPANPVR NVQWDEDSVEYMPANPVR NVQWDEDSVEYMPANPVR	0	1	2	5	5	13
COL5A1	Collagen alpha-1(V) chain	CO5A1_HUMAN	80Step_Domain_p0_to_80	0	80	80.0 AA STEP	80	0	0	3	1	1	0	0	1	1	1	VLDFHNLPDGITK	DAQLSAPTK DAQLSAPTK	0	0	2	2	1	0
COL5A1	Collagen alpha-1(V) chain	CO5A1_HUMAN	80Step_Domain_p80.0_to_160.0	80	160	80.0 AA STEP	80	0	0	3	2	1	0	0	1	1	1	SPVFLYEDHTGKPGPEDYPLFR	DAQLSAPTK QLYPASAFPEDFSILTTVK DAQLSAPTK	0	0	2	4	1	0
COL5A1	Collagen alpha-1(V) chain	CO5A1_HUMAN	80Step_Domain_p160.0_to_240.0	160	240	80.0 AA STEP	80	0	2	1	0	0	0	0.0125	1	1	0	ILDEEVFEGDIQQLLFVSDHR ILDEEVFEGDIQQLLFVSDHR		0	1	1	0	0	0
COL5A1	Collagen alpha-1(V) chain	CO5A1_HUMAN	80Step_Domain_p240.0_to_320.0	240	320	80.0 AA STEP	80	0	0	0	0	0	0	0	1	0	0			0	0	0	0	0	0
COL5A1	Collagen alpha-1(V) chain	CO5A1_HUMAN	80Step_Domain_p320.0_to_400.0	320	400	80.0 AA STEP	80	0	0	0	0	0	0	0	1	0	0			0	0	0	0	0	0
COL5A1	Collagen alpha-1(V) chain	CO5A1_HUMAN	80Step_Domain_p400.0_to_480.0	400	480	80.0 AA STEP	80	0	0	0	0	0	0	0	1	0	0			0	0	0	0	0	0
COL5A1	Collagen alpha-1(V) chain	CO5A1_HUMAN	80Step_Domain_p480.0_to_560.0	480	560	80.0 AA STEP	80	0	0	0	0	0	0	0	1	0	0			0	0	0	0	0	0
COL5A1	Collagen alpha-1(V) chain	CO5A1_HUMAN	80Step_Domain_p560.0_to_640.0	560	640	80.0 AA STEP	80	0	0	0	0	0	0	0	1	0	0			0	0	0	0	0	0
COL5A1	Collagen alpha-1(V) chain	CO5A1_HUMAN	80Step_Domain_p640.0_to_720.0	640	720	80.0 AA STEP	80	0	0	0	0	0	0	0	1	0	0			0	0	0	0	0	0
COL5A1	Collagen alpha-1(V) chain	CO5A1_HUMAN	80Step_Domain_p720.0_to_800.0	720	800	80.0 AA STEP	80	0	0	0	0	0	0	0	1	0	0			0	0	0	0	0	0
COL5A1	Collagen alpha-1(V) chain	CO5A1_HUMAN	80Step_Domain_p800.0_to_880.0	800	880	80.0 AA STEP	80	0	0	0	0	0	0	0	1	0	0			0	0	0	0	0	0
COL5A1	Collagen alpha-1(V) chain	CO5A1_HUMAN	80Step_Domain_p880.0_to_960.0	880	960	80.0 AA STEP	80	0	0	0	0	0	0	0	1	0	0			0	0	0	0	0	0
COL5A1	Collagen alpha-1(V) chain	CO5A1_HUMAN	80Step_Domain_p960.0_to_1040.0	960	1040	80.0 AA STEP	80	0	0	0	0	0	0	0	1	0	0			0	0	0	0	0	0
COL5A1	Collagen alpha-1(V) chain	CO5A1_HUMAN	80Step_Domain_p1040.0_to_1120.0	1040	1120	80.0 AA STEP	80	0	0	0	0	0	0	0	1	0	0			0	0	0	0	0	0
COL5A1	Collagen alpha-1(V) chain	CO5A1_HUMAN	80Step_Domain_p1120.0_to_1200.0	1120	1200	80.0 AA STEP	80	0	0	0	0	0	0	0	1	0	0			0	0	0	0	0	0
COL5A1	Collagen alpha-1(V) chain	CO5A1_HUMAN	80Step_Domain_p1200.0_to_1280.0	1200	1280	80.0 AA STEP	80	0	0	0	0	0	0	0	1	0	0			0	0	0	0	0	0
COL5A1	Collagen alpha-1(V) chain	CO5A1_HUMAN	80Step_Domain_p1280.0_to_1360.0	1280	1360	80.0 AA STEP	80	0	0	0	0	0	0	0	1	0	0			0	0	0	0	0	0
COL5A1	Collagen alpha-1(V) chain	CO5A1_HUMAN	80Step_Domain_p1360.0_to_1440.0	1360	1440	80.0 AA STEP	80	0	0	0	1	1	1	-0.0125	1	0	1		GEAGLEGPPGK GEAGLEGPPGK GEAGLEGPPGK	0	0	0	1	1	2
COL5A1	Collagen alpha-1(V) chain	CO5A1_HUMAN	80Step_Domain_p1440.0_to_1520.0	1440	1520	80.0 AA STEP	80	0	0	0	0	0	0	0	1	0	0			0	0	0	0	0	0
COL5A1	Collagen alpha-1(V) chain	CO5A1_HUMAN	80Step_Domain_p1520.0_to_1600.0	1520	1600	80.0 AA STEP	80	0	0	0	0	0	0	0	1	0	0			0	0	0	0	0	0
COL5A1	Collagen alpha-1(V) chain	CO5A1_HUMAN	80Step_Domain_p1600.0_to_1680.0	1600	1680	80.0 AA STEP	80	0	0	0	0	1	0	0	1	0	0		RPLGTQQNPAR	0	0	0	0	1	0
COL5A1	Collagen alpha-1(V) chain	CO5A1_HUMAN	80Step_Domain_p1680.0_to_1760.0	1680	1760	80.0 AA STEP	80	0	2	1	5	7	7	-0.0625	0	1	6	LLSYVDAEGNPVGVVQMTFLR LLSYVDAEGNPVGVVQMTFLR	ENPGSWFSEFK LLSYVDAEGNPVGVVQMTFLR ENPGSWFSEFK LLSYVDAEGNPVGVVQMTFLR ENPGSWFSEFK LLSYVDAEGNPVGVVQMTFLR	0	1	1	9	10	9
COL5A1	Collagen alpha-1(V) chain	CO5A1_HUMAN	80Step_Domain_p1760.0_to_1838.0	1760	1838	80.0 AA STEP	78	18	14	9	10	8	9	0.0641026	0	14	9	FLGSNDEEMSYDNNPYIR TVLEIDTPK FLGSNDEEMSYDNNPYIR TVLEIDTPK VEQVPIVDIMFNDFGEASQK FLGSNDEEMSYDNNPYIR VEQVPIVDIMFNDFGEASQK	FLGSNDEEMSYDNNPYIR TVLEIDTPK VEQVPIVDIMFNDFGEASQK FLGSNDEEMSYDNNPYIR TVLEIDTPK VEQVPIVDIMFNDFGEASQK FLGSNDEEMSYDNNPYIR TVLEIDTPK VEQVPIVDIMFNDFGEASQK	3	9	7	18	11	13
COL5A1	Collagen alpha-1(V) chain	CO5A1_HUMAN	100Step_Domain_p0_to_100	0	100	100.0 AA STEP	100	0	0	3	2	1	0	0	1	1	1	VLDFHNLPDGITK	DAQLSAPTK QLYPASAFPEDFSILTTVK DAQLSAPTK	0	0	2	4	1	0
COL5A1	Collagen alpha-1(V) chain	CO5A1_HUMAN	100Step_Domain_p100.0_to_200.0	100	200	100.0 AA STEP	100	0	0	3	1	0	0	0.01	1	1	0	SPVFLYEDHTGKPGPEDYPLFR	QLYPASAFPEDFSILTTVK	0	0	2	2	0	0
COL5A1	Collagen alpha-1(V) chain	CO5A1_HUMAN	100Step_Domain_p200.0_to_300.0	200	300	100.0 AA STEP	100	0	2	1	0	0	0	0.01	1	1	0	ILDEEVFEGDIQQLLFVSDHR ILDEEVFEGDIQQLLFVSDHR		0	1	1	0	0	0
COL5A1	Collagen alpha-1(V) chain	CO5A1_HUMAN	100Step_Domain_p300.0_to_400.0	300	400	100.0 AA STEP	100	0	0	0	0	0	0	0	1	0	0			0	0	0	0	0	0
COL5A1	Collagen alpha-1(V) chain	CO5A1_HUMAN	100Step_Domain_p400.0_to_500.0	400	500	100.0 AA STEP	100	0	0	0	0	0	0	0	1	0	0			0	0	0	0	0	0
COL5A1	Collagen alpha-1(V) chain	CO5A1_HUMAN	100Step_Domain_p500.0_to_600.0	500	600	100.0 AA STEP	100	0	0	0	0	0	0	0	1	0	0			0	0	0	0	0	0
COL5A1	Collagen alpha-1(V) chain	CO5A1_HUMAN	100Step_Domain_p600.0_to_700.0	600	700	100.0 AA STEP	100	0	0	0	0	0	0	0	1	0	0			0	0	0	0	0	0
COL5A1	Collagen alpha-1(V) chain	CO5A1_HUMAN	100Step_Domain_p700.0_to_800.0	700	800	100.0 AA STEP	100	0	0	0	0	0	0	0	1	0	0			0	0	0	0	0	0
COL5A1	Collagen alpha-1(V) chain	CO5A1_HUMAN	100Step_Domain_p800.0_to_900.0	800	900	100.0 AA STEP	100	0	0	0	0	0	0	0	1	0	0			0	0	0	0	0	0
COL5A1	Collagen alpha-1(V) chain	CO5A1_HUMAN	100Step_Domain_p900.0_to_1000.0	900	1000	100.0 AA STEP	100	0	0	0	0	0	0	0	1	0	0			0	0	0	0	0	0
COL5A1	Collagen alpha-1(V) chain	CO5A1_HUMAN	100Step_Domain_p1000.0_to_1100.0	1000	1100	100.0 AA STEP	100	0	0	0	0	0	0	0	1	0	0			0	0	0	0	0	0
COL5A1	Collagen alpha-1(V) chain	CO5A1_HUMAN	100Step_Domain_p1100.0_to_1200.0	1100	1200	100.0 AA STEP	100	0	0	0	0	0	0	0	1	0	0			0	0	0	0	0	0
COL5A1	Collagen alpha-1(V) chain	CO5A1_HUMAN	100Step_Domain_p1200.0_to_1300.0	1200	1300	100.0 AA STEP	100	0	0	0	0	0	0	0	1	0	0			0	0	0	0	0	0
COL5A1	Collagen alpha-1(V) chain	CO5A1_HUMAN	100Step_Domain_p1300.0_to_1400.0	1300	1400	100.0 AA STEP	100	0	0	0	0	0	0	0	1	0	0			0	0	0	0	0	0
COL5A1	Collagen alpha-1(V) chain	CO5A1_HUMAN	100Step_Domain_p1400.0_to_1500.0	1400	1500	100.0 AA STEP	100	0	0	0	1	1	1	-0.01	1	0	1		GEAGLEGPPGK GEAGLEGPPGK GEAGLEGPPGK	0	0	0	1	1	2
COL5A1	Collagen alpha-1(V) chain	CO5A1_HUMAN	100Step_Domain_p1500.0_to_1600.0	1500	1600	100.0 AA STEP	100	0	0	0	0	0	0	0	1	0	0			0	0	0	0	0	0
COL5A1	Collagen alpha-1(V) chain	CO5A1_HUMAN	100Step_Domain_p1600.0_to_1700.0	1600	1700	100.0 AA STEP	100	0	0	0	3	4	3	-0.03	0.0076	0	3		ENPGSWFSEFK ENPGSWFSEFK RPLGTQQNPAR ENPGSWFSEFK	0	0	0	5	5	4
COL5A1	Collagen alpha-1(V) chain	CO5A1_HUMAN	100Step_Domain_p1700.0_to_1800.0	1700	1800	100.0 AA STEP	100	18	10	7	13	14	14	-0.02	0.5719	12	14	FLGSNDEEMSYDNNPYIR TVLEIDTPK FLGSNDEEMSYDNNPYIR LLSYVDAEGNPVGVVQMTFLR TVLEIDTPK FLGSNDEEMSYDNNPYIR LLSYVDAEGNPVGVVQMTFLR	ENPGSWFSEFK FLGSNDEEMSYDNNPYIR LLSYVDAEGNPVGVVQMTFLR TVLEIDTPK ENPGSWFSEFK FLGSNDEEMSYDNNPYIR LLSYVDAEGNPVGVVQMTFLR TVLEIDTPK ENPGSWFSEFK FLGSNDEEMSYDNNPYIR LLSYVDAEGNPVGVVQMTFLR TVLEIDTPK	3	6	5	24	19	19
COL5A1	Collagen alpha-1(V) chain	CO5A1_HUMAN	100Step_Domain_p1800.0_to_1838.0	1800	1838	100.0 AA STEP	38	6	8	4	2	4	4	0.0789474	0.0817	6	3	TVLEIDTPK TVLEIDTPK VEQVPIVDIMFNDFGEASQK VEQVPIVDIMFNDFGEASQK	TVLEIDTPK VEQVPIVDIMFNDFGEASQK TVLEIDTPK VEQVPIVDIMFNDFGEASQK TVLEIDTPK VEQVPIVDIMFNDFGEASQK	1	5	3	4	5	5
N/A	cDNA FLJ50237; highly similar to Homo sapiens fibulin 2 (FBLN2); transcript variant 1; mRNA	B7Z6T9_HUMAN	EGF-like	195	233	DOMAINS	38	0	0	0	0	0	0	0	1	0	0			0	0	0	0	0	0
N/A	cDNA FLJ50237; highly similar to Homo sapiens fibulin 2 (FBLN2); transcript variant 1; mRNA	B7Z6T9_HUMAN	EGF-like_238_279	238	279	DOMAINS	41	0	0	0	0	0	0	0	1	0	0			0	0	0	0	0	0
N/A	cDNA FLJ50237; highly similar to Homo sapiens fibulin 2 (FBLN2); transcript variant 1; mRNA	B7Z6T9_HUMAN	EGF-like_280_318	280	318	DOMAINS	38	0	0	0	0	0	0	0	1	0	0			0	0	0	0	0	0
COL1A2	Collagen alpha-2(I) chain	CO1A2_HUMAN	50Step_Domain_p600.0_to_650.0	600	650	50.0 AA STEP	50	5	7	9	1	0	1	0.12	0	7	1	GEPGVVGAVGTAGPSGPSGLPGER GPPGESGAAGPTGPIGSR GEPGVVGAVGTAGPSGPSGLPGER GPPGESGAAGPTGPIGSR GEPGVVGAVGTAGPSGPSGLPGER GPPGESGAAGPTGPIGSR	GEPGVVGAVGTAGPSGPSGLPGER GEPGVVGAVGTAGPSGPSGLPGER	3	3	9	1	0	1
COL1A2	Collagen alpha-2(I) chain	CO1A2_HUMAN	50Step_Domain_p950.0_to_1000.0	950	1000	50.0 AA STEP	50	19	17	14	6	7	8	0.2	0	17	7	GETGPSGPVGPAGAVGPR GPSGPQGIR GETGPSGPVGPAGAVGPR GETGPSGPVGPAGAVGPR HGNRGETGPSGPVGPAGAVGPR	GETGPSGPVGPAGAVGPR GETGPSGPVGPAGAVGPR GPSGPQGIR GETGPSGPVGPAGAVGPR	11	8	14	7	8	13
COL1A2	Collagen alpha-2(I) chain	CO1A2_HUMAN	50Step_Domain_p1100.0_to_1150.0	1100	1150	50.0 AA STEP	50	5	2	1	11	13	9	-0.16	0	3	11	DYEVDATLK SLNNQIETLLTPEGSR DYEVDATLK DYEVDATLK	DYEVDATLK SLNNQIETLLTPEGSR DYEVDATLK SLNNQIETLLTPEGSR DYEVDATLK SLNNQIETLLTPEGSR	3	1	1	14	16	14
COL1A2	Collagen alpha-2(I) chain	CO1A2_HUMAN	50Step_Domain_p1200.0_to_1250.0	1200	1250	50.0 AA STEP	50	0	2	0	5	8	4	-0.1	0	1	6	EMATQLAFMR	AQPENIPAK EMATQLAFMR AQPENIPAK EMATQLAFMR AQPENIPAK EMATQLAFMR	0	1	0	6	10	6
COL1A2	Collagen alpha-2(I) chain	CO1A2_HUMAN	50Step_Domain_p1250.0_to_1300.0	1250	1300	50.0 AA STEP	50	2	13	3	22	25	23	-0.34	0	6	23	NSIAYMDEETGNLK AVILQGSNDVELVAEGNSR EMATQLAFMR NSIAYMDEETGNLK NSIAYMDEETGNLKK AVILQGSNDVELVAEGNSR NSIAYMDEETGNLK NSIAYMDEETGNLKK	AVILQGSNDVELVAEGNSR EMATQLAFMR NSIAYMDEETGNLK NSIAYMDEETGNLKK AVILQGSNDVELVAEGNSR EMATQLAFMR NSIAYMDEETGNLK NSIAYMDEETGNLKK AVILQGSNDVELVAEGNSR EMATQLAFMR NSIAYMDEETGNLK NSIAYMDEETGNLKK	1	6	3	28	31	36
COL1A2	Collagen alpha-2(I) chain	CO1A2_HUMAN	50Step_Domain_p1300.0_to_1350.0	1300	1350	50.0 AA STEP	50	0	7	1	13	10	12	-0.18	0	3	12	AVILQGSNDVELVAEGNSR AVILQGSNDVELVAEGNSR	AVILQGSNDVELVAEGNSR AVILQGSNDVELVAEGNSR AVILQGSNDVELVAEGNSR	0	3	1	16	12	19
COL15A1	Collagen alpha-1(XV) chain	COFA1_HUMAN	50Step_Domain_p1300.0_to_1350.0	1300	1350	50.0 AA STEP	50	5	0	0	6	4	5	-0.06	0	2	5	DIMTDPSWPQK TADTAVTGLASPLSTGK	DIMTDPSWPQK TADTAVTGLASPLSTGK DIMTDPSWPQK TADTAVTGLASPLSTGK DIMTDPSWPQK TADTAVTGLASPLSTGK	3	0	0	6	5	9
COL15A1	Collagen alpha-1(XV) chain	COFA1_HUMAN	50Step_Domain_p1350.0_to_1388.0	1350	1388	50.0 AA STEP	38	4	0	0	5	4	4	-0.0789474	0	1	4	TADTAVTGLASPLSTGK	TADTAVTGLASPLSTGK TADTAVTGLASPLSTGK TADTAVTGLASPLSTGK	2	0	0	5	4	7
COL6A2	Collagen alpha-2(VI) chain	CO6A2_HUMAN	50Step_Domain_p650.0_to_700.0	650	700	50.0 AA STEP	50	37	37	33	22	16	23	0.32	0	36	20	IDSLSSFK NLEWIAGGTWTPSALK VGVVQYSHEGTFEAIQLDDER IDSLSSFK NLEWIAGGTWTPSALK VGVVQYSHEGTFEAIQLDDER VGVVQYSHEGTFEAIQLDDERIDSLSSFK IDSLSSFK NLEWIAGGTWTPSALK VGVVQYSHEGTFEAIQLDDER VGVVQYSHEGTFEAIQLDDERIDSLSSFK	IDSLSSFK NLEWIAGGTWTPSALK VGVVQYSHEGTFEAIQLDDER IDSLSSFK NLEWIAGGTWTPSALK VGVVQYSHEGTFEAIQLDDER IDSLSSFK NLEWIAGGTWTPSALK VGVVQYSHEGTFEAIQLDDER	13	15	17	26	19	38
COL6A2	Collagen alpha-2(VI) chain	CO6A2_HUMAN	50Step_Domain_p850.0_to_900.0	850	900	50.0 AA STEP	50	0	0	0	16	12	13	-0.28	0	0	14		DDDPLNAR LGEQNFHK RDDDPLNAR DDDPLNAR RDDDPLNAR DDDPLNAR LGEQNFHK RDDDPLNAR	0	0	0	19	14	22
COL6A1	Collagen alpha-1(VI) chain	CO6A1_HUMAN	50Step_Domain_p700.0_to_750.0	700	750	50.0 AA STEP	50	17	25	30	67	42	46	-0.56	0	24	52	DQLLPPSPNNR IALVITDGR DQLLPPSPNNR IALVITDGR SLQWMAGGTFTGEALQYTR DQLLPPSPNNR IALVITDGR SLQWMAGGTFTGEALQYTR	DQLLPPSPNNR DTTPLNVLCSPGIQVVSVGIK IALVITDGR SLQWMAGGTFTGEALQYTR DQLLPPSPNNR DTTPLNVLCSPGIQVVSVGIK IALVITDGR SLQWMAGGTFTGEALQYTR DQLLPPSPNNR DTTPLNVLCSPGIQVVSVGIK IALVITDGR SLQWMAGGTFTGEALQYTR	7	9	13	78	69	57
N/A	cDNA FLJ50237; highly similar to Homo sapiens fibulin 2 (FBLN2); transcript variant 1; mRNA	B7Z6T9_HUMAN	80Step_Domain_p0_to_80	0	80	80.0 AA STEP	80	0	0	0	0	0	0	0	1	0	0			0	0	0	0	0	0
N/A	cDNA FLJ50237; highly similar to Homo sapiens fibulin 2 (FBLN2); transcript variant 1; mRNA	B7Z6T9_HUMAN	80Step_Domain_p80.0_to_160.0	80	160	80.0 AA STEP	80	0	0	0	0	0	0	0	1	0	0			0	0	0	0	0	0
N/A	cDNA FLJ50237; highly similar to Homo sapiens fibulin 2 (FBLN2); transcript variant 1; mRNA	B7Z6T9_HUMAN	80Step_Domain_p160.0_to_240.0	160	240	80.0 AA STEP	80	0	0	0	0	0	0	0	1	0	0			0	0	0	0	0	0
N/A	cDNA FLJ50237; highly similar to Homo sapiens fibulin 2 (FBLN2); transcript variant 1; mRNA	B7Z6T9_HUMAN	80Step_Domain_p240.0_to_320.0	240	320	80.0 AA STEP	80	0	0	0	0	0	0	0	1	0	0			0	0	0	0	0	0
N/A	cDNA FLJ50237; highly similar to Homo sapiens fibulin 2 (FBLN2); transcript variant 1; mRNA	B7Z6T9_HUMAN	80Step_Domain_p320.0_to_400.0	320	400	80.0 AA STEP	80	0	0	0	0	0	0	0	1	0	0			0	0	0	0	0	0
N/A	cDNA FLJ50237; highly similar to Homo sapiens fibulin 2 (FBLN2); transcript variant 1; mRNA	B7Z6T9_HUMAN	80Step_Domain_p400.0_to_480.0	400	480	80.0 AA STEP	80	1	0	0	0	0	0	0	0.5033	0	0	GNEEGYFGTR		1	0	0	0	0	0
N/A	cDNA FLJ50237; highly similar to Homo sapiens fibulin 2 (FBLN2); transcript variant 1; mRNA	B7Z6T9_HUMAN	80Step_Domain_p480.0_to_521.0	480	521	80.0 AA STEP	41	1	0	0	0	0	0	0	0.5033	0	0	DFALDVEMK		2	0	0	0	0	0
N/A	cDNA FLJ50237; highly similar to Homo sapiens fibulin 2 (FBLN2); transcript variant 1; mRNA	B7Z6T9_HUMAN	100Step_Domain_p0_to_100	0	100	100.0 AA STEP	100	0	0	0	0	0	0	0	1	0	0			0	0	0	0	0	0
N/A	cDNA FLJ50237; highly similar to Homo sapiens fibulin 2 (FBLN2); transcript variant 1; mRNA	B7Z6T9_HUMAN	100Step_Domain_p100.0_to_200.0	100	200	100.0 AA STEP	100	0	0	0	0	0	0	0	1	0	0			0	0	0	0	0	0
N/A	cDNA FLJ50237; highly similar to Homo sapiens fibulin 2 (FBLN2); transcript variant 1; mRNA	B7Z6T9_HUMAN	100Step_Domain_p200.0_to_300.0	200	300	100.0 AA STEP	100	0	0	0	0	0	0	0	1	0	0			0	0	0	0	0	0
N/A	cDNA FLJ50237; highly similar to Homo sapiens fibulin 2 (FBLN2); transcript variant 1; mRNA	B7Z6T9_HUMAN	100Step_Domain_p300.0_to_400.0	300	400	100.0 AA STEP	100	0	0	0	0	0	0	0	1	0	0			0	0	0	0	0	0
N/A	cDNA FLJ50237; highly similar to Homo sapiens fibulin 2 (FBLN2); transcript variant 1; mRNA	B7Z6T9_HUMAN	100Step_Domain_p400.0_to_500.0	400	500	100.0 AA STEP	100	2	0	0	0	0	0	0.01	0.132	1	0	DFALDVEMK GNEEGYFGTR		3	0	0	0	0	0
N/A	cDNA FLJ50237; highly similar to Homo sapiens fibulin 2 (FBLN2); transcript variant 1; mRNA	B7Z6T9_HUMAN	100Step_Domain_p500.0_to_521.0	500	521	100.0 AA STEP	21	0	0	0	0	0	0	0	1	0	0			0	0	0	0	0	0
SEMA3D	Semaphorin-3D	SEM3D_HUMAN	Sema	44	531	DOMAINS	487	1	2	1	0	0	0	0.00205339	0	1	0	SVYPVAGGPTFK FIGTFFIPDTYNPDDDK SVYPVAGGPTFK DGLVQLSLHR SVYPVAGGPTFK		1	3	2	0	0	0
SEMA3D	Semaphorin-3D	SEM3D_HUMAN	PSI	533	585	DOMAINS	52	0	0	0	0	0	0	0	1	0	0			0	0	0	0	0	0
SEMA3D	Semaphorin-3D	SEM3D_HUMAN	Ig-like C2-type	592	680	DOMAINS	88	1	1	1	0	0	0	0.0113636	0.0006	1	0	TEYGLLIR TEYGLLIR TEYGLLIR		1	2	2	0	0	0
N/A	Testicular tissue protein Li 61	A0A140VJI7_HUMAN	50Step_Domain_p200.0_to_250.0	200	250	50.0 AA STEP	50	2	2	2	0	0	0	0.04	0	2	0	LVWEEAMSR QGETLNFLEIGYSR LVWEEAMSR QGETLNFLEIGYSR LVWEEAMSR QGETLNFLEIGYSR		4	3	3	0	0	0
ECM1	Extracellular matrix protein 1	ECM1_HUMAN	50Step_Domain_p200.0_to_250.0	200	250	50.0 AA STEP	50	2	2	2	0	0	0	0.04	0	2	0	LVWEEAMSR QGETLNFLEIGYSR LVWEEAMSR QGETLNFLEIGYSR LVWEEAMSR QGETLNFLEIGYSR		4	3	3	0	0	0
F10	Coagulation factor X	FA10_HUMAN	50Step_Domain_p300.0_to_350.0	300	350	50.0 AA STEP	50	2	3	0	0	0	0	0.04	0	2	0	DWAESTLMTQK ETYDFDIAVLR NTEQEEGGEAVHEVEVVIK ETYDFDIAVLR NTEQEEGGEAVHEVEVVIK		4	3	0	0	0	0
COL6A3	Collagen alpha-3(VI) chain	CO6A3_HUMAN	50Step_Domain_p850.0_to_900.0	850	900	50.0 AA STEP	50	25	35	26	16	12	11	0.32	0	29	13	FDEHQSKPEILNLVK IAVAQYSDDVK IIDELNVKPEGTR DILFLFDGSANLVGQFPVVR FDEHQSKPEILNLVK IAVAQYSDDVK IIDELNVKPEGTR FDEHQSKPEILNLVK IAVAQYSDDVK IIDELNVKPEGTR	IAVAQYSDDVK IIDELNVKPEGTR IAVAQYSDDVK IIDELNVKPEGTR IAVAQYSDDVK IIDELNVKPEGTR	12	16	14	20	19	17
COL6A3	Collagen alpha-3(VI) chain	CO6A3_HUMAN	50Step_Domain_p900.0_to_950.0	900	950	50.0 AA STEP	50	15	24	15	2	3	3	0.3	0	18	3	ALNLGYALDYAQR FDEHQSKPEILNLVK ALNLGYALDYAQR FDEHQSKPEILNLVK ALNLGYALDYAQR FDEHQSKPEILNLVK	ALNLGYALDYAQR ALNLGYALDYAQR ALNLGYALDYAQR	7	11	8	2	4	5
COL6A3	Collagen alpha-3(VI) chain	CO6A3_HUMAN	50Step_Domain_p1900.0_to_1950.0	1900	1950	50.0 AA STEP	50	32	37	51	53	68	72	-0.48	0	40	64	SQHPYVLTEDTLK VSVVANTPSGPVEAFDFDEYQPEMLEK VVIHFTDGADGDLADLHR SQHPYVLTEDTLK VSVVANTPSGPVEAFDFDEYQPEMLEK VVIHFTDGADGDLADLHR QSSPDSVK SQHPYVLTEDTLK VSVVANTPSGPVEAFDFDEYQPEMLEK VVIHFTDGADGDLADLHR	SQHPYVLTEDTLK VSVVANTPSGPVEAFDFDEYQPEMLEK VVIHFTDGADGDLADLHR QSSPDSVK SQHPYVLTEDTLK VSVVANTPSGPVEAFDFDEYQPEMLEK VVIHFTDGADGDLADLHR SQHPYVLTEDTLK VSVVANTPSGPVEAFDFDEYQPEMLEK VVIHFTDGADGDLADLHR	15	17	28	67	104	111
COL6A3	Collagen alpha-3(VI) chain	CO6A3_HUMAN	50Step_Domain_p1950.0_to_2000.0	1950	2000	50.0 AA STEP	50	25	18	26	31	44	53	-0.4	0	23	43	ALILVGLER VVIHFTDGADGDLADLHR ALILVGLER VVIHFTDGADGDLADLHR ALILVGLER LMHLEFGR VVIHFTDGADGDLADLHR	ALILVGLER LMHLEFGR VVIHFTDGADGDLADLHR ALILVGLER GFMYDRPLR LMHLEFGR VVIHFTDGADGDLADLHR ALILVGLER LMHLEFGR VVIHFTDGADGDLADLHR	12	8	14	39	68	82
COL6A3	Collagen alpha-3(VI) chain	CO6A3_HUMAN	50Step_Domain_p2000.0_to_2050.0	2000	2050	50.0 AA STEP	50	6	18	15	31	34	26	-0.34	0	13	30	GPIGSIGPK LNLLDLDYELAEQLDNIAEK LNLLDLDYELAEQLDNIAEK GPIGSIGPK LNLLDLDYELAEQLDNIAEK	GPIGSIGPK LNLLDLDYELAEQLDNIAEK GDRGPIGSIGPK GFMYDRPLR GPIGSIGPK LNLLDLDYELAEQLDNIAEK GPIGSIGPK LNLLDLDYELAEQLDNIAEK	3	8	8	40	52	40
N/A	Testicular tissue protein Li 70	A0A140VJJ6_HUMAN	50Step_Domain_p100.0_to_150.0	100	150	50.0 AA STEP	50	28	39	49	0	0	0	0.78	0	39	0	AIQLTYNPDESSKPNMIDAATLK YEASILTHDSSIR YLQEIYNSNNQK AIQLTYNPDESSKPNMIDAATLK YEASILTHDSSIR YLQEIYNSNNQK YEASILTHDSSIR YLQEIYNSNNQK		55	22	2	0	0	0
N/A	Testicular tissue protein Li 70	A0A140VJJ6_HUMAN	50Step_Domain_p200.0_to_250.0	200	250	50.0 AA STEP	50	24	33	25	0	0	0	0.54	0	27	0	ANQQFLVYCEIDGSGNGWTVFQK EGFGHLSPTGTTEFWLGNEK LDGSVDFK RLDGSVDFK ANQQFLVYCEIDGSGNGWTVFQK EGFGHLSPTGTTEFWLGNEK LDGSVDFK RLDGSVDFK EGFGHLSPTGTTEFWLGNEK		48	19	1	0	0	0
N/A	Testicular tissue protein Li 70	A0A140VJJ6_HUMAN	50Step_Domain_p250.0_to_300.0	250	300	50.0 AA STEP	50	37	42	49	0	0	0	0.86	0	43	0	EGFGHLSPTGTTEFWLGNEK IHLISTQSAIPYALR TSTADYAMFK VELEDWNGR EGFGHLSPTGTTEFWLGNEK IHLISTQSAIPYALR TSTADYAMFK VELEDWNGR EGFGHLSPTGTTEFWLGNEK VELEDWNGR		73	24	2	0	0	0
FGG	Fibrinogen gamma chain	C9JC84_HUMAN	50Step_Domain_p100.0_to_150.0	100	150	50.0 AA STEP	50	28	39	49	0	0	0	0.78	0	39	0	AIQLTYNPDESSKPNMIDAATLK YEASILTHDSSIR YLQEIYNSNNQK AIQLTYNPDESSKPNMIDAATLK YEASILTHDSSIR YLQEIYNSNNQK YEASILTHDSSIR YLQEIYNSNNQK		55	22	2	0	0	0
FGG	Fibrinogen gamma chain	C9JC84_HUMAN	50Step_Domain_p200.0_to_250.0	200	250	50.0 AA STEP	50	25	35	25	0	0	0	0.56	0	28	0	ANQQFLVYCEIDGSGNGWTVFQK EGFGHLSPTGTTEFWLGNEK LDGSVDFK QSGLYFIKPLK RLDGSVDFK ANQQFLVYCEIDGSGNGWTVFQK EGFGHLSPTGTTEFWLGNEK LDGSVDFK QSGLYFIKPLK RLDGSVDFK EGFGHLSPTGTTEFWLGNEK		49	20	1	0	0	0
FGG	Fibrinogen gamma chain	C9JC84_HUMAN	50Step_Domain_p250.0_to_300.0	250	300	50.0 AA STEP	50	37	42	49	0	0	0	0.86	0	43	0	EGFGHLSPTGTTEFWLGNEK IHLISTQSAIPYALR TSTADYAMFK VELEDWNGR EGFGHLSPTGTTEFWLGNEK IHLISTQSAIPYALR TSTADYAMFK VELEDWNGR EGFGHLSPTGTTEFWLGNEK VELEDWNGR		73	24	2	0	0	0
FGG	Fibrinogen gamma chain	FIBG_HUMAN	50Step_Domain_p100.0_to_150.0	100	150	50.0 AA STEP	50	28	39	49	0	0	0	0.78	0	39	0	AIQLTYNPDESSKPNMIDAATLK YEASILTHDSSIR YLQEIYNSNNQK AIQLTYNPDESSKPNMIDAATLK YEASILTHDSSIR YLQEIYNSNNQK YEASILTHDSSIR YLQEIYNSNNQK		55	22	2	0	0	0
FGG	Fibrinogen gamma chain	FIBG_HUMAN	50Step_Domain_p200.0_to_250.0	200	250	50.0 AA STEP	50	24	33	25	0	0	0	0.54	0	27	0	ANQQFLVYCEIDGSGNGWTVFQK EGFGHLSPTGTTEFWLGNEK LDGSVDFK RLDGSVDFK ANQQFLVYCEIDGSGNGWTVFQK EGFGHLSPTGTTEFWLGNEK LDGSVDFK RLDGSVDFK EGFGHLSPTGTTEFWLGNEK		48	19	1	0	0	0
SEMA3D	Semaphorin-3D	SEM3D_HUMAN	80Step_Domain_p0_to_80	0	80	80.0 AA STEP	80	0	0	0	0	0	0	0	1	0	0			0	0	0	0	0	0
SEMA3D	Semaphorin-3D	SEM3D_HUMAN	80Step_Domain_p80.0_to_160.0	80	160	80.0 AA STEP	80	0	0	0	0	0	0	0	1	0	0			0	0	0	0	0	0
SEMA3D	Semaphorin-3D	SEM3D_HUMAN	80Step_Domain_p160.0_to_240.0	160	240	80.0 AA STEP	80	0	0	0	0	0	0	0	1	0	0			0	0	0	0	0	0
SEMA3D	Semaphorin-3D	SEM3D_HUMAN	80Step_Domain_p240.0_to_320.0	240	320	80.0 AA STEP	80	0	1	0	0	0	0	0	0.31	0	0	FIGTFFIPDTYNPDDDK		0	2	0	0	0	0
SEMA3D	Semaphorin-3D	SEM3D_HUMAN	80Step_Domain_p320.0_to_400.0	320	400	80.0 AA STEP	80	0	0	0	0	0	0	0	1	0	0			0	0	0	0	0	0
SEMA3D	Semaphorin-3D	SEM3D_HUMAN	80Step_Domain_p400.0_to_480.0	400	480	80.0 AA STEP	80	1	1	1	0	0	0	0.0125	0	1	0	SVYPVAGGPTFK SVYPVAGGPTFK SVYPVAGGPTFK		1	1	1	0	0	0
SEMA3D	Semaphorin-3D	SEM3D_HUMAN	80Step_Domain_p480.0_to_560.0	480	560	80.0 AA STEP	80	0	0	1	0	0	0	0	0.31	0	0	DGLVQLSLHR		0	0	1	0	0	0
SEMA3D	Semaphorin-3D	SEM3D_HUMAN	80Step_Domain_p560.0_to_640.0	560	640	80.0 AA STEP	80	0	0	0	0	0	0	0	1	0	0			0	0	0	0	0	0
SEMA3D	Semaphorin-3D	SEM3D_HUMAN	80Step_Domain_p640.0_to_720.0	640	720	80.0 AA STEP	80	1	1	1	0	0	0	0.0125	0	1	0	TEYGLLIR TEYGLLIR TEYGLLIR		1	2	2	0	0	0
SEMA3D	Semaphorin-3D	SEM3D_HUMAN	80Step_Domain_p720.0_to_777.0	720	777	80.0 AA STEP	57	0	0	0	0	0	0	0	1	0	0			0	0	0	0	0	0
SEMA3D	Semaphorin-3D	SEM3D_HUMAN	100Step_Domain_p0_to_100	0	100	100.0 AA STEP	100	0	0	0	0	0	0	0	1	0	0			0	0	0	0	0	0
SEMA3D	Semaphorin-3D	SEM3D_HUMAN	100Step_Domain_p100.0_to_200.0	100	200	100.0 AA STEP	100	0	0	0	0	0	0	0	1	0	0			0	0	0	0	0	0
SEMA3D	Semaphorin-3D	SEM3D_HUMAN	100Step_Domain_p200.0_to_300.0	200	300	100.0 AA STEP	100	0	1	0	0	0	0	0	0.432	0	0	FIGTFFIPDTYNPDDDK		0	2	0	0	0	0
SEMA3D	Semaphorin-3D	SEM3D_HUMAN	100Step_Domain_p300.0_to_400.0	300	400	100.0 AA STEP	100	0	0	0	0	0	0	0	1	0	0			0	0	0	0	0	0
SEMA3D	Semaphorin-3D	SEM3D_HUMAN	100Step_Domain_p400.0_to_500.0	400	500	100.0 AA STEP	100	1	1	1	0	0	0	0.01	0	1	0	SVYPVAGGPTFK SVYPVAGGPTFK SVYPVAGGPTFK		1	1	1	0	0	0
SEMA3D	Semaphorin-3D	SEM3D_HUMAN	100Step_Domain_p500.0_to_600.0	500	600	100.0 AA STEP	100	0	0	1	0	0	0	0	0.432	0	0	DGLVQLSLHR		0	0	1	0	0	0
SEMA3D	Semaphorin-3D	SEM3D_HUMAN	100Step_Domain_p600.0_to_700.0	600	700	100.0 AA STEP	100	1	1	1	0	0	0	0.01	0	1	0	TEYGLLIR TEYGLLIR TEYGLLIR		1	2	2	0	0	0
SEMA3D	Semaphorin-3D	SEM3D_HUMAN	100Step_Domain_p700.0_to_777.0	700	777	100.0 AA STEP	77	0	0	0	0	0	0	0	1	0	0			0	0	0	0	0	0
DKFZp586A1519	Uncharacterized protein DKFZp586A1519	Q9Y3V7_HUMAN	EGF-like	250	288	DOMAINS	38	0	0	0	0	0	0	0	1	0	0			0	0	0	0	0	0
DKFZp586A1519	Uncharacterized protein DKFZp586A1519	Q9Y3V7_HUMAN	EGF-like_293_334	293	334	DOMAINS	41	0	0	0	0	0	0	0	1	0	0			0	0	0	0	0	0
DKFZp586A1519	Uncharacterized protein DKFZp586A1519	Q9Y3V7_HUMAN	EGF-like_335_373	335	373	DOMAINS	38	0	0	0	0	0	0	0	1	0	0			0	0	0	0	0	0
FGG	Fibrinogen gamma chain	FIBG_HUMAN	50Step_Domain_p250.0_to_300.0	250	300	50.0 AA STEP	50	37	42	49	0	0	0	0.86	0	43	0	EGFGHLSPTGTTEFWLGNEK IHLISTQSAIPYALR TSTADYAMFK VELEDWNGR EGFGHLSPTGTTEFWLGNEK IHLISTQSAIPYALR TSTADYAMFK VELEDWNGR EGFGHLSPTGTTEFWLGNEK VELEDWNGR		73	24	2	0	0	0
FGA	Fibrinogen alpha chain	FIBA_HUMAN	50Step_Domain_p150.0_to_200.0	150	200	50.0 AA STEP	50	17	29	57	0	0	0	0.68	0	34	0	EVDLKDYEDQQK LEVDIDIK RLEVDIDIK VQHIQLLQK EVDLKDYEDQQK LEVDIDIK RLEVDIDIK VQHIQLLQK EVDLKDYEDQQK		33	18	1	0	0	0
FGA	Fibrinogen alpha chain	FIBA_HUMAN	50Step_Domain_p200.0_to_250.0	200	250	50.0 AA STEP	50	37	17	57	0	0	0	0.74	0	37	0	ALTDMPQMR EVDLKDYEDQQK MKPVPDLVPGNFK QLEQVIAK ALTDMPQMR EVDLKDYEDQQK EVDLKDYEDQQK		73	11	1	0	0	0
APOC1	Apolipoprotein C-I	APOC1_HUMAN	50Step_Domain_p50.0_to_83.0	50	83	50.0 AA STEP	33	2	3	3	0	0	0	0.0909091	0	3	0	EWFSETFQK EWFSETFQK MREWFSETFQK EWFSETFQK		4	6	2	0	0	0
APOA1	Apolipoprotein A-I	APOA1_HUMAN	50Step_Domain_p50.0_to_100.0	50	100	50.0 AA STEP	50	110	138	101	29	0	0	2.12	0	116	10	DLATVYVDVLKDSGR DSGRDYVSQFEGSALGK DYVSQFEGSALGK EQLGPVTQEFWDNLEK EQLGPVTQEFWDNLEKETEGLR LLDNWDSVTSTFSK LREQLGPVTQEFWDNLEK DLATVYVDVLKDSGR DSGRDYVSQFEGSALGK DYVSQFEGSALGK EQLGPVTQEFWDNLEK EQLGPVTQEFWDNLEKETEGLR LLDNWDSVTSTFSK LREQLGPVTQEFWDNLEK LREQLGPVTQEFWDNLEKETEGLR DLATVYVDVLKDSGR EQLGPVTQEFWDNLEK LLDNWDSVTSTFSK LREQLGPVTQEFWDNLEK	EQLGPVTQEFWDNLEK	220	118	9	1	0	0
CLU	Clusterin	CLUS_HUMAN	50Step_Domain_p150.0_to_200.0	150	200	50.0 AA STEP	50	117	132	137	96	74	100	0.78	0	129	90	ASSIIDELFQDR ASSIIDELFQDRFFTR IDSLLENDR QQTHMLDVMQDHFSR ASSIIDELFQDR ASSIIDELFQDRFFTR EPQDTYHYLPFSLPHR IDSLLENDR IDSLLENDRQQTHMLDVMQDHFSR QQTHMLDVMQDHFSR ASSIIDELFQDR EPQDTYHYLPFSLPHR IDSLLENDR QQTHMLDVMQDHFSR	ASSIIDELFQDR IDSLLENDR QQTHMLDVMQDHFSR ASSIIDELFQDR IDSLLENDR QQTHMLDVMQDHFSR ASSIIDELFQDR IDSLLENDR QQTHMLDVMQDHFSR	171	180	202	50	47	78
CLU	Clusterin	CLUS_HUMAN	50Step_Domain_p300.0_to_350.0	300	350	50.0 AA STEP	50	57	57	58	81	119	73	-0.68	0	57	91	EILSVDCSTNNPSQAK ELDESLQVAER RELDESLQVAER EILSVDCSTNNPSQAK ELDESLQVAER RELDESLQVAER EILSVDCSTNNPSQAK ELDESLQVAER RELDESLQVAER	EILSVDCSTNNPSQAK ELDESLQVAER RELDESLQVAER EILSVDCSTNNPSQAK ELDESLQVAER RELDESLQVAER EILSVDCSTNNPSQAK ELDESLQVAER RELDESLQVAER	83	78	86	42	76	57
GAA	Lysosomal alpha-glucosidase	LYAG_HUMAN	50Step_Domain_p800.0_to_850.0	800	850	50.0 AA STEP	50	1	1	1	0	0	0	0.02	0	1	0	AGYIIPLQGPGLTTTESR AGYIIPLQGPGLTTTESR AGYIIPLQGPGLTTTESR		2	2	2	0	0	0
GAA	Lysosomal alpha-glucosidase	LYAG_HUMAN	50Step_Domain_p850.0_to_900.0	850	900	50.0 AA STEP	50	1	1	1	0	0	0	0.02	0	1	0	VTSEGAGLQLQK GELFWDDGESLEVLER VTSEGAGLQLQK		1	1	1	0	0	0
GAA	Lysosomal alpha-glucosidase	LYAG_HUMAN	50Step_Domain_p900.0_to_950.0	900	950	50.0 AA STEP	50	1	0	1	0	0	0	0.02	0	1	0	VTSEGAGLQLQK VTSEGAGLQLQK		1	0	1	0	0	0
ABI3BP	Target of Nesh-SH3	D3YTG3_HUMAN	50Step_Domain_p50.0_to_100.0	50	100	50.0 AA STEP	50	55	50	39	26	24	27	0.44	0	48	26	FTEAIVDAEPK LEGLLLGYGSNVSPNQYFPLPAEGK FTEAIVDAEPK LEGLLLGYGSNVSPNQYFPLPAEGK YLIVVRPAPPPSQK FTEAIVDAEPK LEGLLLGYGSNVSPNQYFPLPAEGK YLIVVRPAPPPSQK	FLRPSPNVK FTEAIVDAEPK LEGLLLGYGSNVSPNQYFPLPAEGK YLIVVRPAPPPSQK FTEAIVDAEPK LEGLLLGYGSNVSPNQYFPLPAEGK YLIVVRPAPPPSQK FTEAIVDAEPK LEGLLLGYGSNVSPNQYFPLPAEGK YLIVVRPAPPPSQK	27	28	45	36	37	37
ABI3BP	Target of Nesh-SH3	D3YTG3_HUMAN	50Step_Domain_p1600.0_to_1650.0	1600	1650	50.0 AA STEP	50	29	23	29	34	46	47	-0.3	0	27	42	NPLGEGPVSNTVAFSTESADPR VSEPVSAGR NPLGEGPVSNTVAFSTESADPR NPLGEGPVSNTVAFSTESADPR VSEPVSAGR	NPLGEGPVSNTVAFSTESADPR VSEPVSAGR NPLGEGPVSNTVAFSTESADPR VSEPVSAGR NPLGEGPVSNTVAFSTESADPR VSEPVSAGR	14	13	33	47	69	63
DKFZp586A1519	Uncharacterized protein DKFZp586A1519	Q9Y3V7_HUMAN	80Step_Domain_p0_to_80	0	80	80.0 AA STEP	80	0	0	0	0	0	0	0	1	0	0			0	0	0	0	0	0
DKFZp586A1519	Uncharacterized protein DKFZp586A1519	Q9Y3V7_HUMAN	80Step_Domain_p80.0_to_160.0	80	160	80.0 AA STEP	80	0	0	0	0	0	0	0	1	0	0			0	0	0	0	0	0
DKFZp586A1519	Uncharacterized protein DKFZp586A1519	Q9Y3V7_HUMAN	80Step_Domain_p160.0_to_240.0	160	240	80.0 AA STEP	80	0	0	0	0	0	0	0	1	0	0			0	0	0	0	0	0
DKFZp586A1519	Uncharacterized protein DKFZp586A1519	Q9Y3V7_HUMAN	80Step_Domain_p240.0_to_320.0	240	320	80.0 AA STEP	80	0	0	0	0	0	0	0	1	0	0			0	0	0	0	0	0
DKFZp586A1519	Uncharacterized protein DKFZp586A1519	Q9Y3V7_HUMAN	80Step_Domain_p320.0_to_400.0	320	400	80.0 AA STEP	80	0	0	0	0	0	0	0	1	0	0			0	0	0	0	0	0
DKFZp586A1519	Uncharacterized protein DKFZp586A1519	Q9Y3V7_HUMAN	80Step_Domain_p400.0_to_480.0	400	480	80.0 AA STEP	80	0	0	0	0	0	0	0	1	0	0			0	0	0	0	0	0
DKFZp586A1519	Uncharacterized protein DKFZp586A1519	Q9Y3V7_HUMAN	80Step_Domain_p480.0_to_560.0	480	560	80.0 AA STEP	80	2	0	0	0	0	0	0.0125	0.064	1	0	DFALDVEMK GNEEGYFGTR		3	0	0	0	0	0
DKFZp586A1519	Uncharacterized protein DKFZp586A1519	Q9Y3V7_HUMAN	80Step_Domain_p560.0_to_576.0	560	576	80.0 AA STEP	16	0	0	0	0	0	0	0	1	0	0			0	0	0	0	0	0
DKFZp586A1519	Uncharacterized protein DKFZp586A1519	Q9Y3V7_HUMAN	100Step_Domain_p0_to_100	0	100	100.0 AA STEP	100	0	0	0	0	0	0	0	1	0	0			0	0	0	0	0	0
DKFZp586A1519	Uncharacterized protein DKFZp586A1519	Q9Y3V7_HUMAN	100Step_Domain_p100.0_to_200.0	100	200	100.0 AA STEP	100	0	0	0	0	0	0	0	1	0	0			0	0	0	0	0	0
DKFZp586A1519	Uncharacterized protein DKFZp586A1519	Q9Y3V7_HUMAN	100Step_Domain_p200.0_to_300.0	200	300	100.0 AA STEP	100	0	0	0	0	0	0	0	1	0	0			0	0	0	0	0	0
DKFZp586A1519	Uncharacterized protein DKFZp586A1519	Q9Y3V7_HUMAN	100Step_Domain_p300.0_to_400.0	300	400	100.0 AA STEP	100	0	0	0	0	0	0	0	1	0	0			0	0	0	0	0	0
DKFZp586A1519	Uncharacterized protein DKFZp586A1519	Q9Y3V7_HUMAN	100Step_Domain_p400.0_to_500.0	400	500	100.0 AA STEP	100	0	0	0	0	0	0	0	1	0	0			0	0	0	0	0	0
DKFZp586A1519	Uncharacterized protein DKFZp586A1519	Q9Y3V7_HUMAN	100Step_Domain_p500.0_to_576.0	500	576	100.0 AA STEP	76	2	0	0	0	0	0	0.0131579	0.132	1	0	DFALDVEMK GNEEGYFGTR		3	0	0	0	0	0
N/A	cDNA FLJ56912; highly similar to Fibulin-2	B7Z9B8_HUMAN	Disordered	247	319	REGIONS	72	0	0	0	0	0	0	0	1	0	0			0	0	0	0	0	0
N/A	cDNA FLJ56912; highly similar to Fibulin-2	B7Z9B8_HUMAN	Disordered_434_463	434	463	REGIONS	29	0	0	0	0	0	0	0	1	0	0			0	0	0	0	0	0
N/A	cDNA FLJ56912; highly similar to Fibulin-2	B7Z9B8_HUMAN	Anaphylatoxin-like	471	506	DOMAINS	35	0	0	0	0	0	0	0	1	0	0			0	0	0	0	0	0
N/A	cDNA FLJ56912; highly similar to Fibulin-2	B7Z9B8_HUMAN	Anaphylatoxin-like_514_545	514	545	DOMAINS	31	0	0	0	0	0	0	0	1	0	0			0	0	0	0	0	0
N/A	cDNA FLJ56912; highly similar to Fibulin-2	B7Z9B8_HUMAN	Anaphylatoxin-like_547_579	547	579	DOMAINS	32	0	0	0	0	0	0	0	1	0	0			0	0	0	0	0	0
N/A	cDNA FLJ56912; highly similar to Fibulin-2	B7Z9B8_HUMAN	EGF-like	630	671	DOMAINS	41	0	0	0	0	0	0	0	1	0	0			0	0	0	0	0	0
N/A	cDNA FLJ56912; highly similar to Fibulin-2	B7Z9B8_HUMAN	EGF-like_884_922	884	922	DOMAINS	38	0	0	0	0	0	0	0	1	0	0			0	0	0	0	0	0
N/A	cDNA FLJ56912; highly similar to Fibulin-2	B7Z9B8_HUMAN	EGF-like_927_968	927	968	DOMAINS	41	0	0	0	0	0	0	0	1	0	0			0	0	0	0	0	0
N/A	cDNA FLJ56912; highly similar to Fibulin-2	B7Z9B8_HUMAN	EGF-like_969_1007	969	1007	DOMAINS	38	0	0	0	0	0	0	0	1	0	0			0	0	0	0	0	0
ABI3BP	Target of Nesh-SH3	D3YTG3_HUMAN	50Step_Domain_p1700.0_to_1750.0	1700	1750	50.0 AA STEP	50	59	46	40	34	38	36	0.24	0	48	36	FYNIGDQR IYLSDSLTGK TGQQLTSDQLPIK FYNIGDQR IYLSDSLTGK TGQQLTSDQLPIK FYNIGDQR IYLSDSLTGK TGQQLTSDQLPIK	FYNIGDQR IYLSDSLTGK TGQQLTSDQLPIK TGQQLTSDQLPIKEGYFR FYNIGDQR IYLSDSLTGK TGQQLTSDQLPIK FYNIGDQR IYLSDSLTGK TGQQLTSDQLPIK	29	26	46	47	57	49
N/A	Biglycan	A6NLG9_HUMAN	50Step_Domain_p50.0_to_100.0	50	100	50.0 AA STEP	50	83	73	58	4	14	2	1.28	0	71	7	GLQHLYALVLVNNK NHLVEIPPNLPSSLVELR GLQHLYALVLVNNK NHLVEIPPNLPSSLVELR GLQHLYALVLVNNK NHLVEIPPNLPSSLVELR	NHLVEIPPNLPSSLVELR NHLVEIPPNLPSSLVELR NHLVEIPPNLPSSLVELR	38	41	60	6	22	2
N/A	Biglycan	A6NLG9_HUMAN	50Step_Domain_p100.0_to_150.0	100	150	50.0 AA STEP	50	88	103	105	30	20	33	1.42	0	99	28	NHLVEIPPNLPSSLVELR NMNCIEMGGNPLENSGFEPGAFDGLK NHLVEIPPNLPSSLVELR NMNCIEMGGNPLENSGFEPGAFDGLK NHLVEIPPNLPSSLVELR NMNCIEMGGNPLENSGFEPGAFDGLK	NHLVEIPPNLPSSLVELR NMNCIEMGGNPLENSGFEPGAFDGLK NHLVEIPPNLPSSLVELR NMNCIEMGGNPLENSGFEPGAFDGLK NHLVEIPPNLPSSLVELR NMNCIEMGGNPLENSGFEPGAFDGLK	40	58	109	46	31	38
N/A	Biglycan	A6NLG9_HUMAN	50Step_Domain_p150.0_to_200.0	150	200	50.0 AA STEP	50	48	45	47	145	166	125	-1.96	0	47	145	DLPETLNELHLDHNK IQAIELEDLLR LGLGHNQIR DLPETLNELHLDHNK IQAIELEDLLR LGLGHNQIR DLPETLNELHLDHNK IQAIELEDLLR	DLPETLNELHLDHNK IQAIELEDLLR LGLGHNQIR DLPETLNELHLDHNK IQAIELEDLLR LGLGHNQIR DLPETLNELHLDHNK IQAIELEDLLR LGLGHNQIR	22	25	49	224	257	146
N/A	Biglycan	A8K7E0_HUMAN	50Step_Domain_p100.0_to_150.0	100	150	50.0 AA STEP	50	123	96	93	32	38	33	1.4	0	104	34	EISPDTTLLDLQNNDISELR EISPDTTLLDLQNNDISELRK GLQHLYALVLVNNK NHLVEIPPNLPSSLVELR EISPDTTLLDLQNNDISELR EISPDTTLLDLQNNDISELRK GLQHLYALVLVNNK NHLVEIPPNLPSSLVELR EISPDTTLLDLQNNDISELR EISPDTTLLDLQNNDISELRK GLQHLYALVLVNNK NHLVEIPPNLPSSLVELR SVPKEISPDTTLLDLQNNDISELR	EISPDTTLLDLQNNDISELR EISPDTTLLDLQNNDISELRK NHLVEIPPNLPSSLVELR EISPDTTLLDLQNNDISELR EISPDTTLLDLQNNDISELRK NHLVEIPPNLPSSLVELR EISPDTTLLDLQNNDISELR EISPDTTLLDLQNNDISELRK NHLVEIPPNLPSSLVELR	56	54	97	50	58	39
N/A	Biglycan	A8K7E0_HUMAN	50Step_Domain_p150.0_to_200.0	150	200	50.0 AA STEP	50	88	103	105	30	20	33	1.42	0	99	28	NHLVEIPPNLPSSLVELR NMNCIEMGGNPLENSGFEPGAFDGLK NHLVEIPPNLPSSLVELR NMNCIEMGGNPLENSGFEPGAFDGLK NHLVEIPPNLPSSLVELR NMNCIEMGGNPLENSGFEPGAFDGLK	NHLVEIPPNLPSSLVELR NMNCIEMGGNPLENSGFEPGAFDGLK NHLVEIPPNLPSSLVELR NMNCIEMGGNPLENSGFEPGAFDGLK NHLVEIPPNLPSSLVELR NMNCIEMGGNPLENSGFEPGAFDGLK	40	58	109	46	31	38
N/A	Biglycan	A8K7E0_HUMAN	50Step_Domain_p200.0_to_250.0	200	250	50.0 AA STEP	50	46	78	97	160	165	143	-1.64	0	74	156	DLPETLNELHLDHNK IQAIELEDLLR NMNCIEMGGNPLENSGFEPGAFDGLK DLPETLNELHLDHNK IQAIELEDLLR NMNCIEMGGNPLENSGFEPGAFDGLK DLPETLNELHLDHNK IQAIELEDLLR NMNCIEMGGNPLENSGFEPGAFDGLK	DLPETLNELHLDHNK IQAIELEDLLR NMNCIEMGGNPLENSGFEPGAFDGLK DLPETLNELHLDHNK IQAIELEDLLR NMNCIEMGGNPLENSGFEPGAFDGLK DLPETLNELHLDHNK IQAIELEDLLR NMNCIEMGGNPLENSGFEPGAFDGLK	21	44	101	247	255	166
N/A	Biglycan	B4DDQ2_HUMAN	50Step_Domain_p100.0_to_150.0	100	150	50.0 AA STEP	50	88	103	105	30	20	33	1.42	0	99	28	NHLVEIPPNLPSSLVELR NMNCIEMGGNPLENSGFEPGAFDGLK NHLVEIPPNLPSSLVELR NMNCIEMGGNPLENSGFEPGAFDGLK NHLVEIPPNLPSSLVELR NMNCIEMGGNPLENSGFEPGAFDGLK	NHLVEIPPNLPSSLVELR NMNCIEMGGNPLENSGFEPGAFDGLK NHLVEIPPNLPSSLVELR NMNCIEMGGNPLENSGFEPGAFDGLK NHLVEIPPNLPSSLVELR NMNCIEMGGNPLENSGFEPGAFDGLK	40	58	109	46	31	38
N/A	Biglycan	B4DDQ2_HUMAN	50Step_Domain_p150.0_to_200.0	150	200	50.0 AA STEP	50	20	62	72	137	146	112	-1.62	0	51	132	DLPETLNELHLDHNK NMNCIEMGGNPLENSGFEPGAFDGLK DLPETLNELHLDHNK NMNCIEMGGNPLENSGFEPGAFDGLK DLPETLNELHLDHNK NMNCIEMGGNPLENSGFEPGAFDGLK	DLPETLNELHLDHNK NMNCIEMGGNPLENSGFEPGAFDGLK DLPETLNELHLDHNK NMNCIEMGGNPLENSGFEPGAFDGLK DLPETLNELHLDHNK NMNCIEMGGNPLENSGFEPGAFDGLK	9	35	75	211	226	131
N/A	Biglycan	B4DDQ2_HUMAN	50Step_Domain_p200.0_to_250.0	200	250	50.0 AA STEP	50	48	45	47	145	166	125	-1.96	0	47	145	DLPETLNELHLDHNK IQAIELEDLLR LGLGHNQIR DLPETLNELHLDHNK IQAIELEDLLR LGLGHNQIR DLPETLNELHLDHNK IQAIELEDLLR	DLPETLNELHLDHNK IQAIELEDLLR LGLGHNQIR DLPETLNELHLDHNK IQAIELEDLLR LGLGHNQIR DLPETLNELHLDHNK IQAIELEDLLR LGLGHNQIR	22	25	49	224	257	146
HMCN1	Hemicentin-1	HMCN1_HUMAN	50Step_Domain_p200.0_to_250.0	200	250	50.0 AA STEP	50	1	0	1	0	0	0	0.02	0	1	0	WVEEAVQASK IPFDPSLK		1	0	1	0	0	0
HMCN1	Hemicentin-1	HMCN1_HUMAN	50Step_Domain_p400.0_to_450.0	400	450	50.0 AA STEP	50	0	0	1	0	0	0	0	0	0	0	VSSVSFSSIVPDAPK		0	0	1	0	0	0
HMCN1	Hemicentin-1	HMCN1_HUMAN	50Step_Domain_p2050.0_to_2100.0	2050	2100	50.0 AA STEP	50	1	0	0	0	0	0	0	0	0	0	ILALTSAQISDTGR		1	0	0	0	0	0
HMCN1	Hemicentin-1	HMCN1_HUMAN	50Step_Domain_p3550.0_to_3600.0	3550	3600	50.0 AA STEP	50	1	0	0	0	0	0	0	0	0	0	ISTAQVEDTGR		1	0	0	0	0	0
BGN	Biglycan	PGS1_HUMAN	50Step_Domain_p100.0_to_150.0	100	150	50.0 AA STEP	50	123	96	93	32	38	33	1.4	0	104	34	EISPDTTLLDLQNNDISELR EISPDTTLLDLQNNDISELRK GLQHLYALVLVNNK NHLVEIPPNLPSSLVELR EISPDTTLLDLQNNDISELR EISPDTTLLDLQNNDISELRK GLQHLYALVLVNNK NHLVEIPPNLPSSLVELR EISPDTTLLDLQNNDISELR EISPDTTLLDLQNNDISELRK GLQHLYALVLVNNK NHLVEIPPNLPSSLVELR SVPKEISPDTTLLDLQNNDISELR	EISPDTTLLDLQNNDISELR EISPDTTLLDLQNNDISELRK NHLVEIPPNLPSSLVELR EISPDTTLLDLQNNDISELR EISPDTTLLDLQNNDISELRK NHLVEIPPNLPSSLVELR EISPDTTLLDLQNNDISELR EISPDTTLLDLQNNDISELRK NHLVEIPPNLPSSLVELR	56	54	97	50	58	39
BGN	Biglycan	PGS1_HUMAN	50Step_Domain_p150.0_to_200.0	150	200	50.0 AA STEP	50	88	103	105	30	20	33	1.42	0	99	28	NHLVEIPPNLPSSLVELR NMNCIEMGGNPLENSGFEPGAFDGLK NHLVEIPPNLPSSLVELR NMNCIEMGGNPLENSGFEPGAFDGLK NHLVEIPPNLPSSLVELR NMNCIEMGGNPLENSGFEPGAFDGLK	NHLVEIPPNLPSSLVELR NMNCIEMGGNPLENSGFEPGAFDGLK NHLVEIPPNLPSSLVELR NMNCIEMGGNPLENSGFEPGAFDGLK NHLVEIPPNLPSSLVELR NMNCIEMGGNPLENSGFEPGAFDGLK	40	58	109	46	31	38
BGN	Biglycan	PGS1_HUMAN	50Step_Domain_p200.0_to_250.0	200	250	50.0 AA STEP	50	46	78	97	160	165	143	-1.64	0	74	156	DLPETLNELHLDHNK IQAIELEDLLR NMNCIEMGGNPLENSGFEPGAFDGLK DLPETLNELHLDHNK IQAIELEDLLR NMNCIEMGGNPLENSGFEPGAFDGLK DLPETLNELHLDHNK IQAIELEDLLR NMNCIEMGGNPLENSGFEPGAFDGLK	DLPETLNELHLDHNK IQAIELEDLLR NMNCIEMGGNPLENSGFEPGAFDGLK DLPETLNELHLDHNK IQAIELEDLLR NMNCIEMGGNPLENSGFEPGAFDGLK DLPETLNELHLDHNK IQAIELEDLLR NMNCIEMGGNPLENSGFEPGAFDGLK	21	44	101	247	255	166
N/A	Biglycan	Q53FI4_HUMAN	50Step_Domain_p100.0_to_150.0	100	150	50.0 AA STEP	50	123	96	93	32	38	33	1.4	0	104	34	EISPDTTLLDLQNNDISELR EISPDTTLLDLQNNDISELRK GLQHLYALVLVNNK NHLVEIPPNLPSSLVELR EISPDTTLLDLQNNDISELR EISPDTTLLDLQNNDISELRK GLQHLYALVLVNNK NHLVEIPPNLPSSLVELR EISPDTTLLDLQNNDISELR EISPDTTLLDLQNNDISELRK GLQHLYALVLVNNK NHLVEIPPNLPSSLVELR SVPKEISPDTTLLDLQNNDISELR	EISPDTTLLDLQNNDISELR EISPDTTLLDLQNNDISELRK NHLVEIPPNLPSSLVELR EISPDTTLLDLQNNDISELR EISPDTTLLDLQNNDISELRK NHLVEIPPNLPSSLVELR EISPDTTLLDLQNNDISELR EISPDTTLLDLQNNDISELRK NHLVEIPPNLPSSLVELR	56	54	97	50	58	39
N/A	Biglycan	Q53FI4_HUMAN	50Step_Domain_p150.0_to_200.0	150	200	50.0 AA STEP	50	88	103	105	30	20	33	1.42	0	99	28	NHLVEIPPNLPSSLVELR NMNCIEMGGNPLENSGFEPGAFDGLK NHLVEIPPNLPSSLVELR NMNCIEMGGNPLENSGFEPGAFDGLK NHLVEIPPNLPSSLVELR NMNCIEMGGNPLENSGFEPGAFDGLK	NHLVEIPPNLPSSLVELR NMNCIEMGGNPLENSGFEPGAFDGLK NHLVEIPPNLPSSLVELR NMNCIEMGGNPLENSGFEPGAFDGLK NHLVEIPPNLPSSLVELR NMNCIEMGGNPLENSGFEPGAFDGLK	40	58	109	46	31	38
N/A	Biglycan	Q53FI4_HUMAN	50Step_Domain_p200.0_to_250.0	200	250	50.0 AA STEP	50	46	78	97	160	165	143	-1.64	0	74	156	DLPETLNELHLDHNK IQAIELEDLLR NMNCIEMGGNPLENSGFEPGAFDGLK DLPETLNELHLDHNK IQAIELEDLLR NMNCIEMGGNPLENSGFEPGAFDGLK DLPETLNELHLDHNK IQAIELEDLLR NMNCIEMGGNPLENSGFEPGAFDGLK	DLPETLNELHLDHNK IQAIELEDLLR NMNCIEMGGNPLENSGFEPGAFDGLK DLPETLNELHLDHNK IQAIELEDLLR NMNCIEMGGNPLENSGFEPGAFDGLK DLPETLNELHLDHNK IQAIELEDLLR NMNCIEMGGNPLENSGFEPGAFDGLK	21	44	101	247	255	166
LTBP1	Latent-transforming growth factor beta-binding protein 1	LTBP1_HUMAN	50Step_Domain_p750.0_to_800.0	750	800	50.0 AA STEP	50	1	1	0	0	0	0	0.02	0	1	0	EEPVEALTFSR EEPVEALTFSR		1	1	0	0	0	0
CSPG4	Chondroitin sulfate proteoglycan 4	CSPG4_HUMAN	50Step_Domain_p300.0_to_350.0	300	350	50.0 AA STEP	50	0	0	0	3	6	2	-0.08	0	0	4		GSLLLGGLDAEASR LEISVDQYPTHTSNR GSLLLGGLDAEASR GVLSYLEPR LEISVDQYPTHTSNR GSLLLGGLDAEASR GVLSYLEPR	0	0	0	2	6	2
HSPG2	Heparan sulfate proteoglycan 2 (Perlecan); isoform CRA_b	A0A024RAB6_HUMAN	50Step_Domain_p50.0_to_100.0	50	100	50.0 AA STEP	50	19	13	17	11	12	13	0.08	0	16	12	EVSEAVVDTLESEYLK IPGDQVVSVVFIK SIEYSPQLEDAGSR EVSEAVVDTLESEYLK IPGDQVVSVVFIK SIEYSPQLEDAGSR EVSEAVVDTLESEYLK IPGDQVVSVVFIK SIEYSPQLEDAGSR	EVSEAVVDTLESEYLK IPGDQVVSVVFIK SIEYSPQLEDAGSR EVSEAVVDTLESEYLK IPGDQVVSVVFIK SIEYSPQLEDAGSR EVSEAVVDTLESEYLK IPGDQVVSVVFIK SIEYSPQLEDAGSR	13	11	17	12	11	17
HSPG2	Heparan sulfate proteoglycan 2 (Perlecan); isoform CRA_b	A0A024RAB6_HUMAN	50Step_Domain_p100.0_to_150.0	100	150	50.0 AA STEP	50	1	2	2	8	8	5	-0.1	0	2	7	VISSGSVASYVTSPQGFQFR LGTVPQFPR VISSGSVASYVTSPQGFQFR VISSGSVASYVTSPQGFQFR	LGTVPQFPR VISSGSVASYVTSPQGFQFR LGTVPQFPR VISSGSVASYVTSPQGFQFR LGTVPQFPR VISSGSVASYVTSPQGFQFR	1	2	2	8	7	6
HSPG2	Heparan sulfate proteoglycan 2 (Perlecan); isoform CRA_b	A0A024RAB6_HUMAN	50Step_Domain_p2450.0_to_2500.0	2450	2500	50.0 AA STEP	50	6	6	5	1	1	0	0.1	0	6	1	LSGSHSQGVAYPVR VVGSSGTQEASVLVTIQQR IESSSASLANGHTLDLNCLVASQAPHTITWYK VVGSSGTQEASVLVTIQQR IESSSASLANGHTLDLNCLVASQAPHTITWYK VVGSSGTQEASVLVTIQQR	LSGSHSQGVAYPVR LSGSHSQGVAYPVR	4	5	5	1	1	0
N/A	cDNA FLJ56912; highly similar to Fibulin-2	B7Z9B8_HUMAN	80Step_Domain_p0_to_80	0	80	80.0 AA STEP	80	0	0	0	0	0	0	0	1	0	0			0	0	0	0	0	0
N/A	cDNA FLJ56912; highly similar to Fibulin-2	B7Z9B8_HUMAN	80Step_Domain_p80.0_to_160.0	80	160	80.0 AA STEP	80	0	0	0	0	0	0	0	1	0	0			0	0	0	0	0	0
N/A	cDNA FLJ56912; highly similar to Fibulin-2	B7Z9B8_HUMAN	80Step_Domain_p160.0_to_240.0	160	240	80.0 AA STEP	80	0	0	0	0	0	0	0	1	0	0			0	0	0	0	0	0
N/A	cDNA FLJ56912; highly similar to Fibulin-2	B7Z9B8_HUMAN	80Step_Domain_p240.0_to_320.0	240	320	80.0 AA STEP	80	0	0	0	0	0	0	0	1	0	0			0	0	0	0	0	0
N/A	cDNA FLJ56912; highly similar to Fibulin-2	B7Z9B8_HUMAN	80Step_Domain_p320.0_to_400.0	320	400	80.0 AA STEP	80	0	0	0	0	0	0	0	1	0	0			0	0	0	0	0	0
N/A	cDNA FLJ56912; highly similar to Fibulin-2	B7Z9B8_HUMAN	80Step_Domain_p400.0_to_480.0	400	480	80.0 AA STEP	80	0	0	0	0	0	0	0	1	0	0			0	0	0	0	0	0
N/A	cDNA FLJ56912; highly similar to Fibulin-2	B7Z9B8_HUMAN	80Step_Domain_p480.0_to_560.0	480	560	80.0 AA STEP	80	0	0	0	0	0	0	0	1	0	0			0	0	0	0	0	0
N/A	cDNA FLJ56912; highly similar to Fibulin-2	B7Z9B8_HUMAN	80Step_Domain_p560.0_to_640.0	560	640	80.0 AA STEP	80	0	0	0	0	0	0	0	1	0	0			0	0	0	0	0	0
N/A	cDNA FLJ56912; highly similar to Fibulin-2	B7Z9B8_HUMAN	80Step_Domain_p640.0_to_720.0	640	720	80.0 AA STEP	80	0	0	0	0	0	0	0	1	0	0			0	0	0	0	0	0
N/A	cDNA FLJ56912; highly similar to Fibulin-2	B7Z9B8_HUMAN	80Step_Domain_p720.0_to_800.0	720	800	80.0 AA STEP	80	0	0	0	0	0	0	0	1	0	0			0	0	0	0	0	0
N/A	cDNA FLJ56912; highly similar to Fibulin-2	B7Z9B8_HUMAN	80Step_Domain_p800.0_to_880.0	800	880	80.0 AA STEP	80	0	0	0	0	0	0	0	1	0	0			0	0	0	0	0	0
N/A	cDNA FLJ56912; highly similar to Fibulin-2	B7Z9B8_HUMAN	80Step_Domain_p880.0_to_960.0	880	960	80.0 AA STEP	80	0	0	0	0	0	0	0	1	0	0			0	0	0	0	0	0
N/A	cDNA FLJ56912; highly similar to Fibulin-2	B7Z9B8_HUMAN	80Step_Domain_p960.0_to_1040.0	960	1040	80.0 AA STEP	80	0	0	0	0	0	0	0	1	0	0			0	0	0	0	0	0
N/A	cDNA FLJ56912; highly similar to Fibulin-2	B7Z9B8_HUMAN	80Step_Domain_p1040.0_to_1120.0	1040	1120	80.0 AA STEP	80	0	0	0	0	0	0	0	1	0	0			0	0	0	0	0	0
N/A	cDNA FLJ56912; highly similar to Fibulin-2	B7Z9B8_HUMAN	80Step_Domain_p1120.0_to_1200.0	1120	1200	80.0 AA STEP	80	2	0	0	0	0	0	0.0125	0.0032	1	0	DFALDVEMK GNEEGYFGTR		3	0	0	0	0	0
N/A	cDNA FLJ56912; highly similar to Fibulin-2	B7Z9B8_HUMAN	80Step_Domain_p1200.0_to_1210.0	1200	1210	80.0 AA STEP	10	0	0	0	0	0	0	0	1	0	0			0	0	0	0	0	0
N/A	cDNA FLJ56912; highly similar to Fibulin-2	B7Z9B8_HUMAN	100Step_Domain_p0_to_100	0	100	100.0 AA STEP	100	0	0	0	0	0	0	0	1	0	0			0	0	0	0	0	0
N/A	cDNA FLJ56912; highly similar to Fibulin-2	B7Z9B8_HUMAN	100Step_Domain_p100.0_to_200.0	100	200	100.0 AA STEP	100	0	0	0	0	0	0	0	1	0	0			0	0	0	0	0	0
N/A	cDNA FLJ56912; highly similar to Fibulin-2	B7Z9B8_HUMAN	100Step_Domain_p200.0_to_300.0	200	300	100.0 AA STEP	100	0	0	0	0	0	0	0	1	0	0			0	0	0	0	0	0
N/A	cDNA FLJ56912; highly similar to Fibulin-2	B7Z9B8_HUMAN	100Step_Domain_p300.0_to_400.0	300	400	100.0 AA STEP	100	0	0	0	0	0	0	0	1	0	0			0	0	0	0	0	0
N/A	cDNA FLJ56912; highly similar to Fibulin-2	B7Z9B8_HUMAN	100Step_Domain_p400.0_to_500.0	400	500	100.0 AA STEP	100	0	0	0	0	0	0	0	1	0	0			0	0	0	0	0	0
N/A	cDNA FLJ56912; highly similar to Fibulin-2	B7Z9B8_HUMAN	100Step_Domain_p500.0_to_600.0	500	600	100.0 AA STEP	100	0	0	0	0	0	0	0	1	0	0			0	0	0	0	0	0
N/A	cDNA FLJ56912; highly similar to Fibulin-2	B7Z9B8_HUMAN	100Step_Domain_p600.0_to_700.0	600	700	100.0 AA STEP	100	0	0	0	0	0	0	0	1	0	0			0	0	0	0	0	0
N/A	cDNA FLJ56912; highly similar to Fibulin-2	B7Z9B8_HUMAN	100Step_Domain_p700.0_to_800.0	700	800	100.0 AA STEP	100	0	0	0	0	0	0	0	1	0	0			0	0	0	0	0	0
N/A	cDNA FLJ56912; highly similar to Fibulin-2	B7Z9B8_HUMAN	100Step_Domain_p800.0_to_900.0	800	900	100.0 AA STEP	100	0	0	0	0	0	0	0	1	0	0			0	0	0	0	0	0
N/A	cDNA FLJ56912; highly similar to Fibulin-2	B7Z9B8_HUMAN	100Step_Domain_p900.0_to_1000.0	900	1000	100.0 AA STEP	100	0	0	0	0	0	0	0	1	0	0			0	0	0	0	0	0
N/A	cDNA FLJ56912; highly similar to Fibulin-2	B7Z9B8_HUMAN	100Step_Domain_p1000.0_to_1100.0	1000	1100	100.0 AA STEP	100	0	0	0	0	0	0	0	1	0	0			0	0	0	0	0	0
N/A	cDNA FLJ56912; highly similar to Fibulin-2	B7Z9B8_HUMAN	100Step_Domain_p1100.0_to_1200.0	1100	1200	100.0 AA STEP	100	2	0	0	0	0	0	0.01	0.0091	1	0	DFALDVEMK GNEEGYFGTR		3	0	0	0	0	0
N/A	cDNA FLJ56912; highly similar to Fibulin-2	B7Z9B8_HUMAN	100Step_Domain_p1200.0_to_1210.0	1200	1210	100.0 AA STEP	10	0	0	0	0	0	0	0	1	0	0			0	0	0	0	0	0
FBLN2	Fibulin-2	FBLN2_HUMAN	Subdomain NA (Cys-rich)	28	177	REGIONS	149	0	0	0	0	0	0	0	1	0	0			0	0	0	0	0	0
FBLN2	Fibulin-2	FBLN2_HUMAN	Subdomain NB (Cys-free)	178	444	REGIONS	266	0	0	0	0	0	0	0	1	0	0			0	0	0	0	0	0
FBLN2	Fibulin-2	FBLN2_HUMAN	Domain III	1070	1184	REGIONS	114	2	0	0	0	0	0	0.00877193	0.3267	1	0	DFALDVEMK GNEEGYFGTR		3	0	0	0	0	0
FBLN2	Fibulin-2	FBLN2_HUMAN	Anaphylatoxin-like 1	445	480	DOMAINS	35	0	0	0	0	0	0	0	1	0	0			0	0	0	0	0	0
FBLN2	Fibulin-2	FBLN2_HUMAN	Anaphylatoxin-like 2	488	519	DOMAINS	31	0	0	0	0	0	0	0	1	0	0			0	0	0	0	0	0
FBLN2	Fibulin-2	FBLN2_HUMAN	Anaphylatoxin-like 3	521	553	DOMAINS	32	0	0	0	0	0	0	0	1	0	0			0	0	0	0	0	0
FBLN2	Fibulin-2	FBLN2_HUMAN	EGF-like 1; calcium-binding	604	645	DOMAINS	41	0	0	0	0	0	0	0	1	0	0			0	0	0	0	0	0
FBLN2	Fibulin-2	FBLN2_HUMAN	EGF-like 2	679	718	DOMAINS	39	0	0	0	0	0	0	0	1	0	0			0	0	0	0	0	0
FBLN2	Fibulin-2	FBLN2_HUMAN	EGF-like 3; calcium-binding	719	763	DOMAINS	44	0	0	0	0	0	0	0	1	0	0			0	0	0	0	0	0
FBLN2	Fibulin-2	FBLN2_HUMAN	EGF-like 4; calcium-binding	764	809	DOMAINS	45	0	0	0	0	0	0	0	1	0	0			0	0	0	0	0	0
FBLN2	Fibulin-2	FBLN2_HUMAN	EGF-like 5; calcium-binding	810	857	DOMAINS	47	0	0	0	0	0	0	0	1	0	0			0	0	0	0	0	0
FBLN2	Fibulin-2	FBLN2_HUMAN	EGF-like 6; calcium-binding	858	900	DOMAINS	42	0	0	0	0	0	0	0	1	0	0			0	0	0	0	0	0
FBLN2	Fibulin-2	FBLN2_HUMAN	EGF-like 7; calcium-binding	901	942	DOMAINS	41	0	0	0	0	0	0	0	1	0	0			0	0	0	0	0	0
FBLN2	Fibulin-2	FBLN2_HUMAN	EGF-like 8; calcium-binding	943	981	DOMAINS	38	0	0	0	0	0	0	0	1	0	0			0	0	0	0	0	0
FBLN2	Fibulin-2	FBLN2_HUMAN	EGF-like 9; calcium-binding	982	1024	DOMAINS	42	0	0	0	0	0	0	0	1	0	0			0	0	0	0	0	0
FBLN2	Fibulin-2	FBLN2_HUMAN	EGF-like 10; calcium-binding	1025	1069	DOMAINS	44	0	0	0	0	0	0	0	1	0	0			0	0	0	0	0	0
HSPG2	Heparan sulfate proteoglycan 2 (Perlecan); isoform CRA_b	A0A024RAB6_HUMAN	50Step_Domain_p3550.0_to_3600.0	3550	3600	50.0 AA STEP	50	10	2	7	10	11	12	-0.1	0	6	11	LDGSLPPDSR LDGSLPPDSR LDGSLPPDSR	LDGSLPPDSR LDGSLPPDSR LDGSLPPDSR	7	2	7	11	10	15
APOB	Apolipoprotein B (Including Ag(X) antigen)	C0JYY2_HUMAN	50Step_Domain_p550.0_to_600.0	550	600	50.0 AA STEP	50	3	9	0	0	0	0	0.08	0	4	0	IVQILPWEQNEQVK DKDQEVLLQTFLDDASPGDK IVQILPWEQNEQVK NFVASHIANILNSEELDIQDLKK		5	8	0	0	0	0
APOB	Apolipoprotein B (Including Ag(X) antigen)	C0JYY2_HUMAN	50Step_Domain_p2000.0_to_2050.0	2000	2050	50.0 AA STEP	50	4	9	0	0	0	0	0.08	0	4	0	IGVELTGR TLADLTLLDSPIK TQFNNNEYSQDLDAYNTK TLADLTLLDSPIK VPLLLSEPINIIDALEMR		8	8	0	0	0	0
N/A	Plasminogen	B2R7F8_HUMAN	50Step_Domain_p650.0_to_700.0	650	700	50.0 AA STEP	50	7	5	0	0	0	0	0.08	0	4	0	LSSPAVITDK VILGAHQEVNLEPHVQEIEVSR LSSPAVITDK VILGAHQEVNLEPHVQEIEVSR		13	6	0	0	0	0
PLG	Plasminogen	PLMN_HUMAN	50Step_Domain_p650.0_to_700.0	650	700	50.0 AA STEP	50	7	5	0	0	0	0	0.08	0	4	0	LSSPAVITDK VILGAHQEVNLEPHVQEIEVSR LSSPAVITDK VILGAHQEVNLEPHVQEIEVSR		13	6	0	0	0	0
N/A	cDNA FLJ54622; highly similar to Prothrombin	B4DDT3_HUMAN	50Step_Domain_p200.0_to_250.0	200	250	50.0 AA STEP	50	6	7	0	0	0	0	0.08	0	4	0	ELLESYIDGR IVEGSDAEIGMSPWQVMLFR ELLESYIDGR IVEGSDAEIGMSPWQVMLFR		11	10	0	0	0	0
F2	Prothrombin	THRB_HUMAN	50Step_Domain_p350.0_to_400.0	350	400	50.0 AA STEP	50	6	7	0	0	0	0	0.08	0	4	0	ELLESYIDGR IVEGSDAEIGMSPWQVMLFR ELLESYIDGR IVEGSDAEIGMSPWQVMLFR		11	10	0	0	0	0
PRG4	Proteoglycan 4	PRG4_HUMAN	50Step_Domain_p100.0_to_150.0	100	150	50.0 AA STEP	50	0	7	6	0	0	0	0.08	0	4	0	KVIESEEITEEHSVSENQESSSSSSSSSSSSTIR VIESEEITEEHSVSENQESSSSSSSSSSSSTIR KVIESEEITEEHSVSENQESSSSSSSSSSSSTIR VIESEEITEEHSVSENQESSSSSSSSSSSSTIR		0	7	12	0	0	0
PRG4	Proteoglycan 4	PRG4_HUMAN	50Step_Domain_p150.0_to_200.0	150	200	50.0 AA STEP	50	0	7	6	0	0	0	0.08	0	4	0	KVIESEEITEEHSVSENQESSSSSSSSSSSSTIR VIESEEITEEHSVSENQESSSSSSSSSSSSTIR KVIESEEITEEHSVSENQESSSSSSSSSSSSTIR VIESEEITEEHSVSENQESSSSSSSSSSSSTIR		0	7	12	0	0	0
N/A	cDNA FLJ51676; highly similar to Extracellular matrix protein 2	B4DK93_HUMAN	50Step_Domain_p150.0_to_200.0	150	200	50.0 AA STEP	50	0	0	1	2	3	2	-0.04	0	0	2	EALQSEEDEEVKEEDTEQK	EALQSEEDEEVKEEDTEQK EALQSEEDEEVKEEDTEQK EALQSEEDEEVKEEDTEQK	0	0	1	4	5	1
N/A	cDNA FLJ51676; highly similar to Extracellular matrix protein 2	B4DK93_HUMAN	50Step_Domain_p200.0_to_250.0	200	250	50.0 AA STEP	50	0	0	1	3	5	2	-0.06	0	0	3	EALQSEEDEEVKEEDTEQK	EALQSEEDEEVKEEDTEQK NQGQLYSEGDSR EALQSEEDEEVKEEDTEQK NQGQLYSEGDSR EALQSEEDEEVKEEDTEQK	0	0	1	5	9	1
ECM2	Extracellular matrix protein 2	ECM2_HUMAN	50Step_Domain_p200.0_to_250.0	200	250	50.0 AA STEP	50	0	0	1	3	5	2	-0.06	0	0	3	EALQSEEDEEVKEEDTEQK	EALQSEEDEEVKEEDTEQK NQGQLYSEGDSR EALQSEEDEEVKEEDTEQK NQGQLYSEGDSR EALQSEEDEEVKEEDTEQK	0	0	1	5	9	1
DSP variant protein	DSP variant protein	Q4LE79_HUMAN	50Step_Domain_p300.0_to_350.0	300	350	50.0 AA STEP	50	0	0	1	0	0	0	0	0	0	0	QLQNIIQATSR		0	0	1	0	0	0
DSP variant protein	DSP variant protein	Q4LE79_HUMAN	50Step_Domain_p1000.0_to_1050.0	1000	1050	50.0 AA STEP	50	0	0	1	0	0	0	0	0	0	0	TMIQSPSGVILQEAADVHAR		0	0	1	0	0	0
EMILIN3	EMILIN-3	EMIL3_HUMAN	50Step_Domain_p600.0_to_650.0	600	650	50.0 AA STEP	50	0	0	3	4	6	4	-0.08	0	1	5	VEAEVQAIQEQVSSQGSR	VEAEVQAIQEQVSSQGSR VEAEVQAIQEQVSSQGSR VEAEVQAIQEQVSSQGSR	0	0	2	7	12	6
DSC3	Desmocollin-3	DSC3_HUMAN	50Step_Domain_p0_to_50	0	50	50.0 AA STEP	50	0	0	0	2	1	2	-0.04	0	0	2		VILNVPSK VILNVPSK VILNVPSK	0	0	0	3	2	3
DSC3	Desmocollin-3	DSC3_HUMAN	50Step_Domain_p50.0_to_100.0	50	100	50.0 AA STEP	50	0	0	1	2	2	1	-0.04	0	0	2	VLNDGSVYTAR	VLNDGSVYTAR SFTIWLSDK VLNDGSVYTAR VLNDGSVYTAR	0	0	1	3	3	2
AHNAK	Neuroblast differentiation-associated protein AHNAK	AHNK_HUMAN	50Step_Domain_p1250.0_to_1300.0	1250	1300	50.0 AA STEP	50	0	0	0	8	3	0	-0.08	0	0	4		ADIDVSGPK VDVEVPDVSLEGPEGK ADIDVSGPK VDVEVPDVSLEGPEGK	0	0	0	15	3	0
AHNAK	Neuroblast differentiation-associated protein AHNAK	AHNK_HUMAN	50Step_Domain_p2650.0_to_2700.0	2650	2700	50.0 AA STEP	50	0	0	0	7	2	1	-0.06	0	0	3		ADIDVSGPK ADIDVSGPK VDIEGPDVNIEGPEGK	0	0	0	14	2	1
AHNAK	Neuroblast differentiation-associated protein AHNAK	AHNK_HUMAN	50Step_Domain_p2750.0_to_2800.0	2750	2800	50.0 AA STEP	50	0	0	0	8	3	1	-0.08	0	0	4		ADIDVSGPK GEGPDVDVNLPK ADIDVSGPK GEGPDVDVNLPK GEGPDVDVNLPK	0	0	0	15	3	1
AHNAK	Neuroblast differentiation-associated protein AHNAK	AHNK_HUMAN	50Step_Domain_p2800.0_to_2850.0	2800	2850	50.0 AA STEP	50	0	0	0	7	2	0	-0.06	0	0	3		ADIDVSGPK ADIDVSGPK	0	0	0	14	2	0
AHNAK	Neuroblast differentiation-associated protein AHNAK	AHNK_HUMAN	50Step_Domain_p4050.0_to_4100.0	4050	4100	50.0 AA STEP	50	0	0	0	8	3	1	-0.08	0	0	4		ADIDVSGPK GEGPEVDVNLPK ADIDVSGPK GEGPEVDVNLPK GEGPEVDVNLPK	0	0	0	15	3	1
AHNAK	Neuroblast differentiation-associated protein AHNAK	AHNK_HUMAN	50Step_Domain_p4650.0_to_4700.0	4650	4700	50.0 AA STEP	50	0	0	0	8	5	2	-0.1	0	0	5		ADIDVSGPK GEGPDVDVNLPK VDVDVPDVNIEGPDAK ADIDVSGPK GEGPDVDVNLPK VDVDVPDVNIEGPDAK GEGPDVDVNLPK VDVDVPDVNIEGPDAK	0	0	0	16	4	2
AHNAK	Neuroblast differentiation-associated protein AHNAK	AHNK_HUMAN	50Step_Domain_p4800.0_to_4850.0	4800	4850	50.0 AA STEP	50	0	0	0	7	2	0	-0.06	0	0	3		ADIDVSGPK ADIDVSGPK	0	0	0	14	2	0
FBLN2	Fibulin-2	FBLN2_HUMAN	80Step_Domain_p0_to_80	0	80	80.0 AA STEP	80	0	0	0	0	0	0	0	1	0	0			0	0	0	0	0	0
FBLN2	Fibulin-2	FBLN2_HUMAN	80Step_Domain_p80.0_to_160.0	80	160	80.0 AA STEP	80	0	0	0	0	0	0	0	1	0	0			0	0	0	0	0	0
FBLN2	Fibulin-2	FBLN2_HUMAN	80Step_Domain_p160.0_to_240.0	160	240	80.0 AA STEP	80	0	0	0	0	0	0	0	1	0	0			0	0	0	0	0	0
FBLN2	Fibulin-2	FBLN2_HUMAN	80Step_Domain_p240.0_to_320.0	240	320	80.0 AA STEP	80	0	0	0	0	0	0	0	1	0	0			0	0	0	0	0	0
FBLN2	Fibulin-2	FBLN2_HUMAN	80Step_Domain_p320.0_to_400.0	320	400	80.0 AA STEP	80	0	0	0	0	0	0	0	1	0	0			0	0	0	0	0	0
FBLN2	Fibulin-2	FBLN2_HUMAN	80Step_Domain_p400.0_to_480.0	400	480	80.0 AA STEP	80	0	0	0	0	0	0	0	1	0	0			0	0	0	0	0	0
FBLN2	Fibulin-2	FBLN2_HUMAN	80Step_Domain_p480.0_to_560.0	480	560	80.0 AA STEP	80	0	0	0	0	0	0	0	1	0	0			0	0	0	0	0	0
FBLN2	Fibulin-2	FBLN2_HUMAN	80Step_Domain_p560.0_to_640.0	560	640	80.0 AA STEP	80	0	0	0	0	0	0	0	1	0	0			0	0	0	0	0	0
FBLN2	Fibulin-2	FBLN2_HUMAN	80Step_Domain_p640.0_to_720.0	640	720	80.0 AA STEP	80	0	0	0	0	0	0	0	1	0	0			0	0	0	0	0	0
FBLN2	Fibulin-2	FBLN2_HUMAN	80Step_Domain_p720.0_to_800.0	720	800	80.0 AA STEP	80	0	0	0	0	0	0	0	1	0	0			0	0	0	0	0	0
FBLN2	Fibulin-2	FBLN2_HUMAN	80Step_Domain_p800.0_to_880.0	800	880	80.0 AA STEP	80	0	0	0	0	0	0	0	1	0	0			0	0	0	0	0	0
FBLN2	Fibulin-2	FBLN2_HUMAN	80Step_Domain_p880.0_to_960.0	880	960	80.0 AA STEP	80	0	0	0	0	0	0	0	1	0	0			0	0	0	0	0	0
FBLN2	Fibulin-2	FBLN2_HUMAN	80Step_Domain_p960.0_to_1040.0	960	1040	80.0 AA STEP	80	0	0	0	0	0	0	0	1	0	0			0	0	0	0	0	0
FBLN2	Fibulin-2	FBLN2_HUMAN	80Step_Domain_p1040.0_to_1120.0	1040	1120	80.0 AA STEP	80	0	0	0	0	0	0	0	1	0	0			0	0	0	0	0	0
FBLN2	Fibulin-2	FBLN2_HUMAN	80Step_Domain_p1120.0_to_1184.0	1120	1184	80.0 AA STEP	64	2	0	0	0	0	0	0.015625	0.0045	1	0	DFALDVEMK GNEEGYFGTR		3	0	0	0	0	0
FBLN2	Fibulin-2	FBLN2_HUMAN	100Step_Domain_p0_to_100	0	100	100.0 AA STEP	100	0	0	0	0	0	0	0	1	0	0			0	0	0	0	0	0
FBLN2	Fibulin-2	FBLN2_HUMAN	100Step_Domain_p100.0_to_200.0	100	200	100.0 AA STEP	100	0	0	0	0	0	0	0	1	0	0			0	0	0	0	0	0
FBLN2	Fibulin-2	FBLN2_HUMAN	100Step_Domain_p200.0_to_300.0	200	300	100.0 AA STEP	100	0	0	0	0	0	0	0	1	0	0			0	0	0	0	0	0
FBLN2	Fibulin-2	FBLN2_HUMAN	100Step_Domain_p300.0_to_400.0	300	400	100.0 AA STEP	100	0	0	0	0	0	0	0	1	0	0			0	0	0	0	0	0
FBLN2	Fibulin-2	FBLN2_HUMAN	100Step_Domain_p400.0_to_500.0	400	500	100.0 AA STEP	100	0	0	0	0	0	0	0	1	0	0			0	0	0	0	0	0
FBLN2	Fibulin-2	FBLN2_HUMAN	100Step_Domain_p500.0_to_600.0	500	600	100.0 AA STEP	100	0	0	0	0	0	0	0	1	0	0			0	0	0	0	0	0
FBLN2	Fibulin-2	FBLN2_HUMAN	100Step_Domain_p600.0_to_700.0	600	700	100.0 AA STEP	100	0	0	0	0	0	0	0	1	0	0			0	0	0	0	0	0
FBLN2	Fibulin-2	FBLN2_HUMAN	100Step_Domain_p700.0_to_800.0	700	800	100.0 AA STEP	100	0	0	0	0	0	0	0	1	0	0			0	0	0	0	0	0
FBLN2	Fibulin-2	FBLN2_HUMAN	100Step_Domain_p800.0_to_900.0	800	900	100.0 AA STEP	100	0	0	0	0	0	0	0	1	0	0			0	0	0	0	0	0
FBLN2	Fibulin-2	FBLN2_HUMAN	100Step_Domain_p900.0_to_1000.0	900	1000	100.0 AA STEP	100	0	0	0	0	0	0	0	1	0	0			0	0	0	0	0	0
FBLN2	Fibulin-2	FBLN2_HUMAN	100Step_Domain_p1000.0_to_1100.0	1000	1100	100.0 AA STEP	100	0	0	0	0	0	0	0	1	0	0			0	0	0	0	0	0
FBLN2	Fibulin-2	FBLN2_HUMAN	100Step_Domain_p1100.0_to_1184.0	1100	1184	100.0 AA STEP	84	2	0	0	0	0	0	0.0119048	0.0132	1	0	DFALDVEMK GNEEGYFGTR		3	0	0	0	0	0
VCAN	Versican core protein	CSPG2_HUMAN	GAG-alpha (glucosaminoglycan attachment domain)	348	1335	REGIONS	987	0	11	4	8	7	6	-0.00202634	1	5	7	FHPDINVYIIEVR ITEEFLGK TEEEVFSGMK FHPDINVYIIEVR ITEEFLGK TEEEVFSGMK	ITEEFLGK QLEEVTDEDIAAHGK TEEEVFSGMK ITEEFLGK QLEEVTDEDIAAHGK TEEEVFSGMK ITEEFLGK QLEEVTDEDIAAHGK TEEEVFSGMK	0	5	5	12	11	9
VCAN	Versican core protein	CSPG2_HUMAN	GAG-beta	1336	3089	REGIONS	1753	27	22	35	55	53	62	-0.0165431	0.0002	28	57	LGEPNYGAEIR MSDLSVIGHPIDSESK QEIESETTSEEQIQEEK LGEPNYGAEIR MSDLSVIGHPIDSESK QEIESETTSEEQIQEEK QEVNPVRQEIESETTSEEQIQEEK GQDSTIAASEQQVAAR LGEPNYGAEIR MSDLSVIGHPIDSESK QEIESETTSEEQIQEEK	GQDSTIAASEQQVAAR LGEPNYGAEIR MSDLSVIGHPIDSESK QEIESETTSEEQIQEEK QEVNPVRQEIESETTSEEQIQEEK ATEVTFGEEVEK GQDSTIAASEQQVAAR LGEPNYGAEIR MSDLSVIGHPIDSESK QEIESETTSEEQIQEEK QEVNPVRQEIESETTSEEQIQEEK ATEVTFGEEVEK LGEPNYGAEIR MSDLSVIGHPIDSESK QEIESETTSEEQIQEEK QEVNPVRQEIESETTSEEQIQEEK	9	10	41	85	88	86
VCAN	Versican core protein	CSPG2_HUMAN	Ig-like V-type	21	146	DOMAINS	125	63	42	44	54	56	63	-0.064	1	50	58	CDVMYGIEDTQDTVSLTVDGVVFHYR LLASDAGLYR VSVPTHPEAVGDASLTVVK CDVMYGIEDTQDTVSLTVDGVVFHYR LLASDAGLYR VSVPTHPEAVGDASLTVVK CDVMYGIEDTQDTVSLTVDGVVFHYR ETTVLVAQNGNIK LLASDAGLYR VSVPTHPEAVGDASLTVVK	LLASDAGLYR VSVPTHPEAVGDASLTVVK CDVMYGIEDTQDTVSLTVDGVVFHYR LLASDAGLYR VSVPTHPEAVGDASLTVVK CDVMYGIEDTQDTVSLTVDGVVFHYR LLASDAGLYR VSVPTHPEAVGDASLTVVK	21	19	51	83	94	88
VCAN	Versican core protein	CSPG2_HUMAN	Link 1	150	245	DOMAINS	95	30	31	29	16	22	19	0.115789	0.5586	30	19	CDVMYGIEDTQDTVSLTVDGVVFHYR SPQETYDVYCYVDHLDGDVFHLTVPSK YTLNFEAAQK AATSRYTLNFEAAQK CDVMYGIEDTQDTVSLTVDGVVFHYR YTLNFEAAQK CDVMYGIEDTQDTVSLTVDGVVFHYR SPQETYDVYCYVDHLDGDVFHLTVPSK YTLNFEAAQK	YTLNFEAAQK AATSRYTLNFEAAQK CDVMYGIEDTQDTVSLTVDGVVFHYR SPQETYDVYCYVDHLDGDVFHLTVPSK YTLNFEAAQK CDVMYGIEDTQDTVSLTVDGVVFHYR YTLNFEAAQK	10	14	33	25	37	26
VCAN	Versican core protein	CSPG2_HUMAN	Link 2	251	347	DOMAINS	96	78	51	73	50	53	37	0.208333	0.014	67	47	FTFEEAAK LATVGELQAAWR NGFDQCDYGWLSDASVR SPQETYDVYCYVDHLDGDVFHLTVPSK FTFEEAAK LATVGELQAAWR NGFDQCDYGWLSDASVR AQCGGGLLGVR FTFEEAAK FTFEEAAKECENQDAR LATVGELQAAWR NGFDQCDYGWLSDASVR SPQETYDVYCYVDHLDGDVFHLTVPSK	AQCGGGLLGVR FTFEEAAK FTFEEAAKECENQDAR LATVGELQAAWR NGFDQCDYGWLSDASVR AQCGGGLLGVR FTFEEAAK FTFEEAAKECENQDAR LATVGELQAAWR NGFDQCDYGWLSDASVR SPQETYDVYCYVDHLDGDVFHLTVPSK FENQTGFPPPDSR FTFEEAAK FTFEEAAKECENQDAR LATVGELQAAWR NGFDQCDYGWLSDASVR	26	23	85	78	89	51
VCAN	Versican core protein	CSPG2_HUMAN	EGF-like 1	3089	3125	DOMAINS	36	0	0	0	0	0	0	0	1	0	0			0	0	0	0	0	0
VCAN	Versican core protein	CSPG2_HUMAN	EGF-like 2; calcium-binding	3127	3163	DOMAINS	36	0	0	2	1	2	1	0	1	1	1	NGATCVDGFNTFR	NGATCVDGFNTFR NGATCVDGFNTFR NGATCVDGFNTFR	0	0	2	2	3	1
VCAN	Versican core protein	CSPG2_HUMAN	C-type lectin	3176	3290	DOMAINS	114	3	38	19	8	2	6	0.131579	0.1547	20	5	VGHDYQWIGLNDK LQGAHLTSILSHEEQMFVNR VGHDYQWIGLNDK LQGAHLTSILSHEEQMFVNR VGHDYQWIGLNDK	VGHDYQWIGLNDK LQGAHLTSILSHEEQMFVNR VGHDYQWIGLNDK VGHDYQWIGLNDK	1	17	22	13	3	8
VCAN	Versican core protein	CSPG2_HUMAN	Sushi	3294	3354	DOMAINS	60	3	7	3	2	1	1	0.05	1	4	1	YEINSLIR YEINSLIR YEINSLIR	YEINSLIR YEINSLIR YEINSLIR	1	3	3	3	2	2
VIT	Vitrin	VITRN_HUMAN	50Step_Domain_p50.0_to_100.0	50	100	50.0 AA STEP	50	0	0	0	1	2	2	-0.04	0	0	2		IIDPEFIVK IIDPEFIVK IIDPEFIVK	0	0	0	2	2	3
VIT	Vitrin	VITRN_HUMAN	50Step_Domain_p100.0_to_150.0	100	150	50.0 AA STEP	50	0	0	0	3	2	2	-0.04	0	0	2		ESFIVLESKPK ESFIVLESKPK ESFIVLESKPK	0	0	0	6	2	3
VIT	Vitrin	VITRN_HUMAN	50Step_Domain_p500.0_to_550.0	500	550	50.0 AA STEP	50	0	0	0	3	2	4	-0.06	0	0	3		EFEISDTDTR IGAVQYTYEQR IGAVQYTYEQR EFEISDTDTR IGAVQYTYEQR	0	0	0	6	2	7
COL9A1	Collagen alpha-1(IX) chain	CO9A1_HUMAN	50Step_Domain_p50.0_to_100.0	50	100	50.0 AA STEP	50	0	0	0	1	2	2	-0.04	0	0	2		LGNNVDFR IGQDDLPGFDLISQFQVDK LGNNVDFR IGQDDLPGFDLISQFQVDK VVGSATLQVAYK	0	0	0	2	3	2
COL9A1	Collagen alpha-1(IX) chain	CO9A1_HUMAN	50Step_Domain_p100.0_to_150.0	100	150	50.0 AA STEP	50	0	0	0	3	4	4	-0.08	0	0	4		INGQTQSVVFSYK NLYPSGLPEEYSFLTTFR NWNIWQIQDSSGK NLYPSGLPEEYSFLTTFR NWNIWQIQDSSGK NLYPSGLPEEYSFLTTFR NWNIWQIQDSSGK	0	0	0	6	7	5
COL9A1	Collagen alpha-1(IX) chain	CO9A1_HUMAN	50Step_Domain_p200.0_to_250.0	200	250	50.0 AA STEP	50	0	0	0	4	2	2	-0.06	0	0	3		GPIDIDGFAVLGK IESLPIKPR GPIDIDGFAVLGK IESLPIKPR GPIDIDGFAVLGK	0	0	0	8	4	3
KRT8	Keratin; type II cytoskeletal 8	K2C8_HUMAN	50Step_Domain_p150.0_to_200.0	150	200	50.0 AA STEP	50	0	0	0	3	1	7	-0.08	0	0	4		LEAELGNMQGLVEDFK QLETLGQEK LEAELGNMQGLVEDFK KDVDEAYMNK LEAELGNMQGLVEDFK QLETLGQEK RTEMENEFVLIK TEMENEFVLIK	0	0	0	2	1	14
KRT8	Keratin; type II cytoskeletal 8	K2C8_HUMAN	50Step_Domain_p200.0_to_250.0	200	250	50.0 AA STEP	50	0	0	0	3	4	5	-0.08	0	0	4		LEGLTDEINFLR QLYEEEIR LEGLTDEINFLR QLYEEEIR KDVDEAYMNK LEGLTDEINFLR QLYEEEIR	0	0	0	2	3	9
KRT8	Keratin; type II cytoskeletal 8	K2C8_HUMAN	50Step_Domain_p250.0_to_300.0	250	300	50.0 AA STEP	50	0	0	0	5	4	3	-0.08	0	0	4		AEAESMYQIK SLDMDSIIAEVK YEELQSLAGK AEAESMYQIK YEELQSLAGK AEAESMYQIK SLDMDSIIAEVK	0	0	0	3	3	5
KRT8	Keratin; type II cytoskeletal 8	K2C8_HUMAN	50Step_Domain_p300.0_to_350.0	300	350	50.0 AA STEP	50	0	0	0	5	4	4	-0.08	0	0	4		ASLEAAIADAEQR LQAEIEGLK ASLEAAIADAEQR TEISEMNR ASLEAAIADAEQR LQAEIEGLK TEISEMNR	0	0	0	3	3	7
ENPP2	Ectonucleotide pyrophosphatase/phosphodiesterase family member 2	ENPP2_HUMAN	50Step_Domain_p300.0_to_350.0	300	350	50.0 AA STEP	50	0	0	0	4	8	4	-0.1	0	0	5		IVGQLMDGLK YGPFGPEMTNPLR IVGQLMDGLK YGPFGPEMTNPLR IVGQLMDGLK YGPFGPEMTNPLR	0	0	0	7	7	7
H1-0	Histone H1.0	H10_HUMAN	50Step_Domain_p0_to_50	0	50	50.0 AA STEP	50	0	0	0	6	3	8	-0.12	0	0	6		YSDMIVAAIQAEK YSDMIVAAIQAEK YSDMIVAAIQAEK	0	0	0	5	2	9
CYTL1	Cytokine-like protein 1	CYTL1_HUMAN	50Step_Domain_p50.0_to_100.0	50	100	50.0 AA STEP	50	0	0	0	5	4	5	-0.1	0	0	5		LYTIMNSFCR VAQVDSLKDK LYTIMNSFCR VAQVDSLK VAQVDSLKDK LYTIMNSFCR VAQVDSLK VAQVDSLKDK	0	0	0	5	7	5
CYTL1	Cytokine-like protein 1	CYTL1_HUMAN	50Step_Domain_p100.0_to_136.0	100	136	50.0 AA STEP	36	0	0	0	3	2	2	-0.0555556	0	0	2		LYTIMNSFCR LYTIMNSFCR LYTIMNSFCR	0	0	0	3	3	2
MB	Myoglobin	MYG_HUMAN	50Step_Domain_p0_to_50	0	50	50.0 AA STEP	50	0	0	0	4	3	4	-0.08	0	0	4		GHPETLEK VEADIPGHGQEVLIR VEADIPGHGQEVLIR GHPETLEK VEADIPGHGQEVLIR	0	0	0	7	3	5
MB	Myoglobin	MYG_HUMAN	50Step_Domain_p100.0_to_150.0	100	150	50.0 AA STEP	50	0	0	0	2	2	2	-0.04	0	0	2		HPGDFGADAQGAMNK HPGDFGADAQGAMNK HPGDFGADAQGAMNK	0	0	0	4	2	2
GLNG	Myoglobin	A0A1K0FU49_HUMAN	50Step_Domain_p0_to_50	0	50	50.0 AA STEP	50	0	0	0	4	3	4	-0.08	0	0	4		GHPETLEK VEADIPGHGQEVLIR VEADIPGHGQEVLIR GHPETLEK VEADIPGHGQEVLIR	0	0	0	7	3	5
GLNG	Myoglobin	A0A1K0FU49_HUMAN	50Step_Domain_p100.0_to_150.0	100	150	50.0 AA STEP	50	0	0	0	2	2	2	-0.04	0	0	2		HPGDFGADAQGAMNK HPGDFGADAQGAMNK HPGDFGADAQGAMNK	0	0	0	4	2	2
MYH9	Myosin-9	MYH9_HUMAN	50Step_Domain_p1800.0_to_1850.0	1800	1850	50.0 AA STEP	50	0	0	0	2	0	1	-0.02	0	0	1		IAQLEEQLDNETK IAQLEEQLDNETK	0	0	0	2	0	1
N/A	Basement membrane-specific heparan sulfate proteoglycan core protein variant	Q59EG0_HUMAN	50Step_Domain_p1150.0_to_1200.0	1150	1200	50.0 AA STEP	50	0	0	0	1	1	0	-0.02	0	0	1		SPLPWQYR SPLPWQYR	0	0	0	2	2	0
N/A	Basement membrane-specific heparan sulfate proteoglycan core protein variant	Q59EG0_HUMAN	50Step_Domain_p2250.0_to_2300.0	2250	2300	50.0 AA STEP	50	0	0	0	1	1	0	-0.02	0	0	1		GNVYIGGAPDVATLTGGR GNVYIGGAPDVATLTGGR	0	0	0	1	1	0
LAMA5	Laminin subunit alpha-5	LAMA5_HUMAN	50Step_Domain_p3400.0_to_3450.0	3400	3450	50.0 AA STEP	50	0	0	0	2	1	0	-0.02	0	0	1		ILLVTDGAR ILLVTDGAR	0	0	0	3	1	0
LAMA5	Laminin subunit alpha-5	LAMA5_HUMAN	50Step_Domain_p3550.0_to_3600.0	3550	3600	50.0 AA STEP	50	0	0	0	1	1	0	-0.02	0	0	1		TPPYLQLQVTEK TPPYLQLQVTEK	0	0	0	1	2	0
GPC1	Glypican-1	GPC1_HUMAN	50Step_Domain_p200.0_to_250.0	200	250	50.0 AA STEP	50	0	0	0	1	1	1	-0.02	0	0	1		SFVQGLGVASDVVR SFVQGLGVASDVVR SFVQGLGVASDVVR	0	0	0	1	2	1
SSC5D	Soluble scavenger receptor cysteine-rich domain-containing protein SSC5D	SRCRL_HUMAN	50Step_Domain_p1500.0_to_1550.0	1500	1550	50.0 AA STEP	50	0	0	0	3	2	0	-0.04	0	0	2		GLGQLGEAVK LTQVVEQER QALLLGLTQLVEAAR LTQVVEQER QALLLGLTQLVEAAR	0	0	0	3	4	0
GALNT1	Polypeptide N-acetylgalactosaminyltransferase 1	GALT1_HUMAN	50Step_Domain_p350.0_to_400.0	350	400	50.0 AA STEP	50	0	0	0	1	0	1	-0.02	0	0	1		VDYGDISSR LAEVWMDEFK VDYGDISSR	0	0	0	1	0	2
GALNT1	Polypeptide N-acetylgalactosaminyltransferase 1	GALT1_HUMAN	50Step_Domain_p500.0_to_550.0	500	550	50.0 AA STEP	50	0	0	0	1	0	1	-0.02	0	0	1		ATEEDSQVPSIR ATEEDSQVPSIR	0	0	0	2	0	1
N/A	Polypeptide N-acetylgalactosaminyltransferase	A8KAJ7_HUMAN	50Step_Domain_p350.0_to_400.0	350	400	50.0 AA STEP	50	0	0	0	1	0	1	-0.02	0	0	1		VDYGDISSR LAEVWMDEFK VDYGDISSR	0	0	0	1	0	2
N/A	Polypeptide N-acetylgalactosaminyltransferase	A8KAJ7_HUMAN	50Step_Domain_p500.0_to_550.0	500	550	50.0 AA STEP	50	0	0	0	1	0	1	-0.02	0	0	1		ATEEDSQVPSIR ATEEDSQVPSIR	0	0	0	2	0	1
ENO3	Beta-enolase	ENOB_HUMAN	50Step_Domain_p200.0_to_250.0	200	250	50.0 AA STEP	50	0	0	0	5	7	7	-0.12	0	0	6		DATNVGDEGGFAPNILENNEALELLK TAIQAAGYPDK VVIGMDVAASEFYR DATNVGDEGGFAPNILENNEALELLK TAIQAAGYPDK VVIGMDVAASEFYR DATNVGDEGGFAPNILENNEALELLK TAIQAAGYPDK	0	0	0	9	3	2
ANOS1	Anosmin-1	KALM_HUMAN	50Step_Domain_p0_to_50	0	50	50.0 AA STEP	50	0	0	0	1	1	2	-0.02	0	0	1		LDESLSAGSVQR LDESLSAGSVQR LDESLSAGSVQR	0	0	0	1	1	3
ANOS1	Anosmin-1	KALM_HUMAN	50Step_Domain_p150.0_to_200.0	150	200	50.0 AA STEP	50	0	0	0	2	2	1	-0.04	0	0	2		FTELQSGQLEVK FTELQSGQLEVK FTELQSGQLEVK	0	0	0	2	2	2
ANOS1	Anosmin-1	KALM_HUMAN	50Step_Domain_p200.0_to_250.0	200	250	50.0 AA STEP	50	0	0	0	2	2	1	-0.04	0	0	2		FTELQSGQLEVK FTELQSGQLEVK FTELQSGQLEVK	0	0	0	2	2	2
ANOS1	Anosmin-1	KALM_HUMAN	50Step_Domain_p600.0_to_650.0	600	650	50.0 AA STEP	50	0	0	0	2	1	2	-0.04	0	0	2		LEVQVLTPGGEGPATIK LEVQVLTPGGEGPATIK LEVQVLTPGGEGPATIK	0	0	0	2	1	3
SLIT3	Slit homolog 3 protein	SLIT3_HUMAN	50Step_Domain_p100.0_to_150.0	100	150	50.0 AA STEP	50	0	0	0	1	2	1	-0.02	0	0	1		LDLSENQIQGIPR LDLSENQIQGIPR LDLSENQIQGIPR	0	0	0	2	2	1
SLIT3	Slit homolog 3 protein	SLIT3_HUMAN	50Step_Domain_p300.0_to_350.0	300	350	50.0 AA STEP	50	0	0	0	1	1	1	-0.02	0	0	1		NQISDIAPDAFQGLK NQISDIAPDAFQGLK NQISDIAPDAFQGLK	0	0	0	1	1	1
SLIT3	Slit homolog 3 protein	SLIT3_HUMAN	50Step_Domain_p350.0_to_400.0	350	400	50.0 AA STEP	50	0	0	0	1	1	1	-0.02	0	0	1		NQISDIAPDAFQGLK NQISDIAPDAFQGLK NQISDIAPDAFQGLK	0	0	0	1	1	1
SLIT3	Slit homolog 3 protein	SLIT3_HUMAN	50Step_Domain_p750.0_to_800.0	750	800	50.0 AA STEP	50	0	0	0	1	0	1	-0.02	0	0	1		DVTELYLEGNHLTAVPR DVTELYLEGNHLTAVPR	0	0	0	2	0	1
B3GNT6	Beta-1;4-glucuronyltransferase 1	A0A024R5F9_HUMAN	50Step_Domain_p50.0_to_100.0	50	100	50.0 AA STEP	50	0	0	0	1	0	1	-0.02	0	0	1		TALASGGVLDASGDYR TALASGGVLDASGDYR	0	0	0	1	0	1
B3GNT6	Beta-1;4-glucuronyltransferase 1	A0A024R5F9_HUMAN	50Step_Domain_p150.0_to_200.0	150	200	50.0 AA STEP	50	0	0	0	1	1	1	-0.02	0	0	1		YEAAVPDPR EPGEFALLR YEAAVPDPR YEAAVPDPR	0	0	0	1	2	1
N/A	Beta-1;4-glucuronyltransferase 1	B3KQQ7_HUMAN	50Step_Domain_p50.0_to_100.0	50	100	50.0 AA STEP	50	0	0	0	1	0	1	-0.02	0	0	1		TALASGGVLDASGDYR TALASGGVLDASGDYR	0	0	0	1	0	1
N/A	Beta-1;4-glucuronyltransferase 1	B3KQQ7_HUMAN	50Step_Domain_p150.0_to_200.0	150	200	50.0 AA STEP	50	0	0	0	1	1	1	-0.02	0	0	1		YEAAVPDPR EPGEFALLR YEAAVPDPR YEAAVPDPR	0	0	0	1	2	1
N/A	Beta-1;4-glucuronyltransferase 1	B4DEN5_HUMAN	50Step_Domain_p50.0_to_100.0	50	100	50.0 AA STEP	50	0	0	0	1	0	1	-0.02	0	0	1		TALASGGVLDASGDYR TALASGGVLDASGDYR	0	0	0	1	0	1
N/A	Beta-1;4-glucuronyltransferase 1	B4DEN5_HUMAN	50Step_Domain_p150.0_to_200.0	150	200	50.0 AA STEP	50	0	0	0	1	1	1	-0.02	0	0	1		YEAAVPDPR EPGEFALLR YEAAVPDPR YEAAVPDPR	0	0	0	1	2	1
B4GAT1	Beta-1;4-glucuronyltransferase 1	B4GA1_HUMAN	50Step_Domain_p50.0_to_100.0	50	100	50.0 AA STEP	50	0	0	0	1	0	1	-0.02	0	0	1		TALASGGVLDASGDYR TALASGGVLDASGDYR	0	0	0	1	0	1
B4GAT1	Beta-1;4-glucuronyltransferase 1	B4GA1_HUMAN	50Step_Domain_p150.0_to_200.0	150	200	50.0 AA STEP	50	0	0	0	1	1	1	-0.02	0	0	1		YEAAVPDPR EPGEFALLR YEAAVPDPR YEAAVPDPR	0	0	0	1	2	1
PSAP	Prosaposin	SAP_HUMAN	50Step_Domain_p300.0_to_350.0	300	350	50.0 AA STEP	50	0	0	0	1	0	1	-0.02	0	0	1		EILDAFDK EILDAFDK	0	0	0	1	0	1
PSAP	Prosaposin	SAP_HUMAN	50Step_Domain_p400.0_to_450.0	400	450	50.0 AA STEP	50	0	0	0	1	0	1	-0.02	0	0	1		QEILAALEK QEILAALEK	0	0	0	1	0	2
N/A	Prosaposin (Variant Gaucher disease and variant metachromatic leukodystrophy) variant	Q53FJ5_HUMAN	50Step_Domain_p300.0_to_350.0	300	350	50.0 AA STEP	50	0	0	0	1	0	1	-0.02	0	0	1		EILDAFDK EILDAFDK	0	0	0	1	0	1
N/A	Prosaposin (Variant Gaucher disease and variant metachromatic leukodystrophy) variant	Q53FJ5_HUMAN	50Step_Domain_p400.0_to_450.0	400	450	50.0 AA STEP	50	0	0	0	1	0	1	-0.02	0	0	1		QEILAALEK QEILAALEK	0	0	0	1	0	2
N/A	Prosaposin variant	Q59EN5_HUMAN	50Step_Domain_p300.0_to_350.0	300	350	50.0 AA STEP	50	0	0	0	1	0	1	-0.02	0	0	1		EILDAFDK EILDAFDK	0	0	0	1	0	1
N/A	Prosaposin variant	Q59EN5_HUMAN	50Step_Domain_p400.0_to_450.0	400	450	50.0 AA STEP	50	0	0	0	1	0	1	-0.02	0	0	1		QEILAALEK QEILAALEK	0	0	0	1	0	2
LPL	Lipoprotein lipase	LIPL_HUMAN	50Step_Domain_p150.0_to_200.0	150	200	50.0 AA STEP	50	0	0	0	1	2	1	-0.02	0	0	1		ITGLDPAGPNFEYAEAPSR ITGLDPAGPNFEYAEAPSR ITGLDPAGPNFEYAEAPSR	0	0	0	1	1	2
LPL	Lipoprotein lipase	LIPL_HUMAN	50Step_Domain_p250.0_to_300.0	250	300	50.0 AA STEP	50	0	0	0	1	2	2	-0.04	0	0	2		GLGDVDQLVK GLGDVDQLVK GLGDVDQLVK	0	0	0	1	1	4
N/A	Lipoprotein lipase	A8K2M5_HUMAN	50Step_Domain_p150.0_to_200.0	150	200	50.0 AA STEP	50	0	0	0	1	2	1	-0.02	0	0	1		ITGLDPAGPNFEYAEAPSR ITGLDPAGPNFEYAEAPSR ITGLDPAGPNFEYAEAPSR	0	0	0	1	1	2
N/A	Lipoprotein lipase	A8K2M5_HUMAN	50Step_Domain_p250.0_to_300.0	250	300	50.0 AA STEP	50	0	0	0	1	2	2	-0.04	0	0	2		GLGDVDQLVK GLGDVDQLVK GLGDVDQLVK	0	0	0	1	1	4
N/A	Lipoprotein lipase	B3KRV7_HUMAN	50Step_Domain_p150.0_to_200.0	150	200	50.0 AA STEP	50	0	0	0	1	2	1	-0.02	0	0	1		ITGLDPAGPNFEYAEAPSR ITGLDPAGPNFEYAEAPSR ITGLDPAGPNFEYAEAPSR	0	0	0	1	1	2
N/A	Lipoprotein lipase	B3KRV7_HUMAN	50Step_Domain_p200.0_to_250.0	200	250	50.0 AA STEP	50	0	0	0	1	2	2	-0.04	0	0	2		GLGDVDQLVK GLGDVDQLVK GLGDVDQLVK	0	0	0	1	1	4
N/A	Lipoprotein lipase	B3KRV7_HUMAN	50Step_Domain_p250.0_to_300.0	250	300	50.0 AA STEP	50	0	0	0	1	2	2	-0.04	0	0	2		GLGDVDQLVK GLGDVDQLVK GLGDVDQLVK	0	0	0	1	1	4
N/A	Lipoprotein lipase	Q53HW6_HUMAN	50Step_Domain_p150.0_to_200.0	150	200	50.0 AA STEP	50	0	0	0	1	2	1	-0.02	0	0	1		ITGLDPAGPNFEYAEAPSR ITGLDPAGPNFEYAEAPSR ITGLDPAGPNFEYAEAPSR	0	0	0	1	1	2
N/A	Lipoprotein lipase	Q53HW6_HUMAN	50Step_Domain_p250.0_to_300.0	250	300	50.0 AA STEP	50	0	0	0	1	2	2	-0.04	0	0	2		GLGDVDQLVK GLGDVDQLVK GLGDVDQLVK	0	0	0	1	1	4
COL9A2	Collagen alpha-2(IX) chain	CO9A2_HUMAN	50Step_Domain_p500.0_to_550.0	500	550	50.0 AA STEP	50	0	0	0	5	5	5	-0.1	0	0	5		DATDQHIVDVALK MLQEQLAEVAVSAK DATDQHIVDVALK MLQEQLAEVAVSAK DATDQHIVDVALK MLQEQLAEVAVSAK	0	0	0	9	2	4
CKAP4	Cytoskeleton-associated protein 4	CKAP4_HUMAN	50Step_Domain_p550.0_to_600.0	550	600	50.0 AA STEP	50	0	0	0	0	1	2	-0.02	0	0	1		ASVSQVEADLK IETNENNLESAK ASVSQVEADLK TAVDSLVAYSVK	0	0	0	0	2	3
N/A	cDNA FLJ41699 fis; clone HCHON2004776; highly similar to Homo sapiens cytoskeleton-associated protein 4 (CKAP4); mRNA	B3KVX6_HUMAN	50Step_Domain_p450.0_to_500.0	450	500	50.0 AA STEP	50	0	0	0	0	1	2	-0.02	0	0	1		ASVSQVEADLK IETNENNLESAK ASVSQVEADLK TAVDSLVAYSVK	0	0	0	0	2	3
N/A	Similar to cytoskeleton-associated protein 4	Q8TB01_HUMAN	50Step_Domain_p500.0_to_550.0	500	550	50.0 AA STEP	50	0	0	0	0	1	2	-0.02	0	0	1		ASVSQVEADLK IETNENNLESAK ASVSQVEADLK TAVDSLVAYSVK	0	0	0	0	2	3
CD47	Leukocyte surface antigen CD47	CD47_HUMAN	50Step_Domain_p50.0_to_100.0	50	100	50.0 AA STEP	50	0	0	0	0	1	1	-0.02	0	0	1		IEVSQLLK STVPTDFSSAK IEVSQLLK STVPTDFSSAK	0	0	0	0	2	2
TTN	Titin	TITIN_HUMAN	50Step_Domain_p3050.0_to_3100.0	3050	3100	50.0 AA STEP	50	0	0	0	1	0	0	0	0	0	0		DDQELQITDR	0	0	0	1	0	0
TTN	Titin	TITIN_HUMAN	50Step_Domain_p3100.0_to_3150.0	3100	3150	50.0 AA STEP	50	0	0	0	1	0	0	0	0	0	0		DDQELQITDR	0	0	0	1	0	0
VCAN	Versican core protein	CSPG2_HUMAN	80Step_Domain_p0_to_80	0	80	80.0 AA STEP	80	0	0	1	0	0	0	0	1	0	0	ETTVLVAQNGNIK		0	0	1	0	0	0
VCAN	Versican core protein	CSPG2_HUMAN	80Step_Domain_p80.0_to_160.0	80	160	80.0 AA STEP	80	63	46	44	54	59	63	-0.1	0.473	51	59	CDVMYGIEDTQDTVSLTVDGVVFHYR LLASDAGLYR VSVPTHPEAVGDASLTVVK AATSRYTLNFEAAQK CDVMYGIEDTQDTVSLTVDGVVFHYR LLASDAGLYR VSVPTHPEAVGDASLTVVK CDVMYGIEDTQDTVSLTVDGVVFHYR ETTVLVAQNGNIK LLASDAGLYR VSVPTHPEAVGDASLTVVK	LLASDAGLYR VSVPTHPEAVGDASLTVVK AATSRYTLNFEAAQK CDVMYGIEDTQDTVSLTVDGVVFHYR LLASDAGLYR VSVPTHPEAVGDASLTVVK CDVMYGIEDTQDTVSLTVDGVVFHYR LLASDAGLYR VSVPTHPEAVGDASLTVVK	21	21	51	83	98	88
VCAN	Versican core protein	CSPG2_HUMAN	80Step_Domain_p160.0_to_240.0	160	240	80.0 AA STEP	80	24	24	19	16	21	18	0.05	1	22	18	SPQETYDVYCYVDHLDGDVFHLTVPSK YTLNFEAAQK AATSRYTLNFEAAQK YTLNFEAAQK SPQETYDVYCYVDHLDGDVFHLTVPSK YTLNFEAAQK	YTLNFEAAQK AATSRYTLNFEAAQK SPQETYDVYCYVDHLDGDVFHLTVPSK YTLNFEAAQK YTLNFEAAQK	8	11	22	25	35	25
VCAN	Versican core protein	CSPG2_HUMAN	80Step_Domain_p240.0_to_320.0	240	320	80.0 AA STEP	80	78	51	73	50	53	36	0.2625	0	67	46	FTFEEAAK LATVGELQAAWR NGFDQCDYGWLSDASVR SPQETYDVYCYVDHLDGDVFHLTVPSK FTFEEAAK LATVGELQAAWR NGFDQCDYGWLSDASVR AQCGGGLLGVR FTFEEAAK FTFEEAAKECENQDAR LATVGELQAAWR NGFDQCDYGWLSDASVR SPQETYDVYCYVDHLDGDVFHLTVPSK	AQCGGGLLGVR FTFEEAAK FTFEEAAKECENQDAR LATVGELQAAWR NGFDQCDYGWLSDASVR AQCGGGLLGVR FTFEEAAK FTFEEAAKECENQDAR LATVGELQAAWR NGFDQCDYGWLSDASVR SPQETYDVYCYVDHLDGDVFHLTVPSK FTFEEAAK FTFEEAAKECENQDAR LATVGELQAAWR NGFDQCDYGWLSDASVR	26	23	85	78	89	50
VCAN	Versican core protein	CSPG2_HUMAN	80Step_Domain_p320.0_to_400.0	320	400	80.0 AA STEP	80	0	0	2	1	1	1	0	1	1	1	AQCGGGLLGVR	AQCGGGLLGVR AQCGGGLLGVR FENQTGFPPPDSR	0	0	2	1	2	1
VCAN	Versican core protein	CSPG2_HUMAN	80Step_Domain_p400.0_to_480.0	400	480	80.0 AA STEP	80	0	0	0	0	0	0	0	1	0	0			0	0	0	0	0	0
VCAN	Versican core protein	CSPG2_HUMAN	80Step_Domain_p480.0_to_560.0	480	560	80.0 AA STEP	80	0	0	0	0	0	0	0	1	0	0			0	0	0	0	0	0
VCAN	Versican core protein	CSPG2_HUMAN	80Step_Domain_p560.0_to_640.0	560	640	80.0 AA STEP	80	0	4	3	5	3	3	-0.025	1	2	4	ITEEFLGK ITEEFLGK	ITEEFLGK ITEEFLGK ITEEFLGK	0	2	3	7	5	4
VCAN	Versican core protein	CSPG2_HUMAN	80Step_Domain_p640.0_to_720.0	640	720	80.0 AA STEP	80	0	2	1	3	2	2	-0.0125	1	1	2	TEEEVFSGMK TEEEVFSGMK	TEEEVFSGMK TEEEVFSGMK TEEEVFSGMK	0	1	1	4	4	3
VCAN	Versican core protein	CSPG2_HUMAN	80Step_Domain_p720.0_to_800.0	720	800	80.0 AA STEP	80	0	2	1	3	2	2	-0.0125	1	1	2	TEEEVFSGMK TEEEVFSGMK	TEEEVFSGMK TEEEVFSGMK TEEEVFSGMK	0	1	1	4	4	3
VCAN	Versican core protein	CSPG2_HUMAN	80Step_Domain_p800.0_to_880.0	800	880	80.0 AA STEP	80	0	0	0	1	1	1	-0.0125	1	0	1		QLEEVTDEDIAAHGK QLEEVTDEDIAAHGK QLEEVTDEDIAAHGK	0	0	0	1	2	2
VCAN	Versican core protein	CSPG2_HUMAN	80Step_Domain_p880.0_to_960.0	880	960	80.0 AA STEP	80	0	0	0	0	0	0	0	1	0	0			0	0	0	0	0	0
VCAN	Versican core protein	CSPG2_HUMAN	80Step_Domain_p960.0_to_1040.0	960	1040	80.0 AA STEP	80	0	0	0	0	0	0	0	1	0	0			0	0	0	0	0	0
VCAN	Versican core protein	CSPG2_HUMAN	80Step_Domain_p1040.0_to_1120.0	1040	1120	80.0 AA STEP	80	0	0	0	0	0	0	0	1	0	0			0	0	0	0	0	0
VCAN	Versican core protein	CSPG2_HUMAN	80Step_Domain_p1120.0_to_1200.0	1120	1200	80.0 AA STEP	80	0	0	0	0	0	0	0	1	0	0			0	0	0	0	0	0
VCAN	Versican core protein	CSPG2_HUMAN	80Step_Domain_p1200.0_to_1280.0	1200	1280	80.0 AA STEP	80	0	0	0	0	0	0	0	1	0	0			0	0	0	0	0	0
VCAN	Versican core protein	CSPG2_HUMAN	80Step_Domain_p1280.0_to_1360.0	1280	1360	80.0 AA STEP	80	15	13	26	31	30	43	-0.2125	0	18	35	MSDLSVIGHPIDSESK FHPDINVYIIEVR MSDLSVIGHPIDSESK FHPDINVYIIEVR MSDLSVIGHPIDSESK	MSDLSVIGHPIDSESK MSDLSVIGHPIDSESK MSDLSVIGHPIDSESK	5	6	30	48	50	59
VCAN	Versican core protein	CSPG2_HUMAN	80Step_Domain_p1360.0_to_1440.0	1360	1440	80.0 AA STEP	80	0	0	0	0	0	0	0	1	0	0			0	0	0	0	0	0
VCAN	Versican core protein	CSPG2_HUMAN	80Step_Domain_p1440.0_to_1520.0	1440	1520	80.0 AA STEP	80	0	0	0	0	0	0	0	1	0	0			0	0	0	0	0	0
VCAN	Versican core protein	CSPG2_HUMAN	80Step_Domain_p1520.0_to_1600.0	1520	1600	80.0 AA STEP	80	0	0	0	0	1	1	-0.0125	1	0	1		ATEVTFGEEVEK ATEVTFGEEVEK	0	0	0	0	1	1
VCAN	Versican core protein	CSPG2_HUMAN	80Step_Domain_p1600.0_to_1680.0	1600	1680	80.0 AA STEP	80	0	0	0	0	0	0	0	1	0	0			0	0	0	0	0	0
VCAN	Versican core protein	CSPG2_HUMAN	80Step_Domain_p1680.0_to_1760.0	1680	1760	80.0 AA STEP	80	0	0	0	0	0	0	0	1	0	0			0	0	0	0	0	0
VCAN	Versican core protein	CSPG2_HUMAN	80Step_Domain_p1760.0_to_1840.0	1760	1840	80.0 AA STEP	80	0	0	0	0	0	0	0	1	0	0			0	0	0	0	0	0
VCAN	Versican core protein	CSPG2_HUMAN	80Step_Domain_p1840.0_to_1920.0	1840	1920	80.0 AA STEP	80	3	4	3	4	3	4	-0.0125	1	3	4	LGEPNYGAEIR LGEPNYGAEIR LGEPNYGAEIR	LGEPNYGAEIR LGEPNYGAEIR LGEPNYGAEIR	1	2	3	6	5	5
VCAN	Versican core protein	CSPG2_HUMAN	80Step_Domain_p1920.0_to_2000.0	1920	2000	80.0 AA STEP	80	3	4	3	4	3	4	-0.0125	1	3	4	LGEPNYGAEIR LGEPNYGAEIR LGEPNYGAEIR	LGEPNYGAEIR LGEPNYGAEIR LGEPNYGAEIR	1	2	3	6	5	5
VCAN	Versican core protein	CSPG2_HUMAN	80Step_Domain_p2000.0_to_2080.0	2000	2080	80.0 AA STEP	80	0	0	0	0	0	0	0	1	0	0			0	0	0	0	0	0
VCAN	Versican core protein	CSPG2_HUMAN	80Step_Domain_p2080.0_to_2160.0	2080	2160	80.0 AA STEP	80	9	9	7	19	19	15	-0.125	0.0903	8	18	QEIESETTSEEQIQEEK QEIESETTSEEQIQEEK QEVNPVRQEIESETTSEEQIQEEK QEIESETTSEEQIQEEK	QEIESETTSEEQIQEEK QEVNPVRQEIESETTSEEQIQEEK QEIESETTSEEQIQEEK QEVNPVRQEIESETTSEEQIQEEK QEIESETTSEEQIQEEK QEVNPVRQEIESETTSEEQIQEEK	3	4	8	30	31	21
VCAN	Versican core protein	CSPG2_HUMAN	80Step_Domain_p2160.0_to_2240.0	2160	2240	80.0 AA STEP	80	0	0	0	0	0	0	0	1	0	0			0	0	0	0	0	0
VCAN	Versican core protein	CSPG2_HUMAN	80Step_Domain_p2240.0_to_2320.0	2240	2320	80.0 AA STEP	80	0	0	0	0	0	0	0	1	0	0			0	0	0	0	0	0
VCAN	Versican core protein	CSPG2_HUMAN	80Step_Domain_p2320.0_to_2400.0	2320	2400	80.0 AA STEP	80	0	0	0	0	0	0	0	1	0	0			0	0	0	0	0	0
VCAN	Versican core protein	CSPG2_HUMAN	80Step_Domain_p2400.0_to_2480.0	2400	2480	80.0 AA STEP	80	0	0	0	0	0	0	0	1	0	0			0	0	0	0	0	0
VCAN	Versican core protein	CSPG2_HUMAN	80Step_Domain_p2480.0_to_2560.0	2480	2560	80.0 AA STEP	80	0	0	0	0	0	0	0	1	0	0			0	0	0	0	0	0
VCAN	Versican core protein	CSPG2_HUMAN	80Step_Domain_p2560.0_to_2640.0	2560	2640	80.0 AA STEP	80	0	0	0	0	0	0	0	1	0	0			0	0	0	0	0	0
VCAN	Versican core protein	CSPG2_HUMAN	80Step_Domain_p2640.0_to_2720.0	2640	2720	80.0 AA STEP	80	0	0	0	0	0	0	0	1	0	0			0	0	0	0	0	0
VCAN	Versican core protein	CSPG2_HUMAN	80Step_Domain_p2720.0_to_2800.0	2720	2800	80.0 AA STEP	80	0	0	0	0	0	0	0	1	0	0			0	0	0	0	0	0
VCAN	Versican core protein	CSPG2_HUMAN	80Step_Domain_p2800.0_to_2880.0	2800	2880	80.0 AA STEP	80	0	0	0	0	0	0	0	1	0	0			0	0	0	0	0	0
VCAN	Versican core protein	CSPG2_HUMAN	80Step_Domain_p2880.0_to_2960.0	2880	2960	80.0 AA STEP	80	0	0	0	0	0	0	0	1	0	0			0	0	0	0	0	0
VCAN	Versican core protein	CSPG2_HUMAN	80Step_Domain_p2960.0_to_3040.0	2960	3040	80.0 AA STEP	80	0	0	1	1	1	0	-0.0125	1	0	1	GQDSTIAASEQQVAAR	GQDSTIAASEQQVAAR GQDSTIAASEQQVAAR	0	0	1	1	1	0
VCAN	Versican core protein	CSPG2_HUMAN	80Step_Domain_p3040.0_to_3120.0	3040	3120	80.0 AA STEP	80	0	0	0	0	0	0	0	1	0	0			0	0	0	0	0	0
VCAN	Versican core protein	CSPG2_HUMAN	80Step_Domain_p3120.0_to_3200.0	3120	3200	80.0 AA STEP	80	0	33	17	1	3	1	0.1875	0	17	2	LQGAHLTSILSHEEQMFVNR LQGAHLTSILSHEEQMFVNR NGATCVDGFNTFR	NGATCVDGFNTFR LQGAHLTSILSHEEQMFVNR NGATCVDGFNTFR NGATCVDGFNTFR	0	15	20	2	5	1
VCAN	Versican core protein	CSPG2_HUMAN	80Step_Domain_p3200.0_to_3280.0	3200	3280	80.0 AA STEP	80	3	38	19	8	2	6	0.1875	0	20	5	VGHDYQWIGLNDK LQGAHLTSILSHEEQMFVNR VGHDYQWIGLNDK LQGAHLTSILSHEEQMFVNR VGHDYQWIGLNDK	VGHDYQWIGLNDK LQGAHLTSILSHEEQMFVNR VGHDYQWIGLNDK VGHDYQWIGLNDK	1	17	22	13	3	8
VCAN	Versican core protein	CSPG2_HUMAN	80Step_Domain_p3280.0_to_3360.0	3280	3360	80.0 AA STEP	80	3	7	3	2	1	1	0.0375	1	4	1	YEINSLIR YEINSLIR YEINSLIR	YEINSLIR YEINSLIR YEINSLIR	1	3	3	3	2	2
VCAN	Versican core protein	CSPG2_HUMAN	80Step_Domain_p3360.0_to_3396.0	3360	3396	80.0 AA STEP	36	0	0	0	0	0	0	0	1	0	0			0	0	0	0	0	0
VCAN	Versican core protein	CSPG2_HUMAN	100Step_Domain_p0_to_100	0	100	100.0 AA STEP	100	0	0	1	0	0	0	0	1	0	0	ETTVLVAQNGNIK		0	0	1	0	0	0
VCAN	Versican core protein	CSPG2_HUMAN	100Step_Domain_p100.0_to_200.0	100	200	100.0 AA STEP	100	84	66	57	70	77	81	-0.07	1	69	76	CDVMYGIEDTQDTVSLTVDGVVFHYR LLASDAGLYR VSVPTHPEAVGDASLTVVK YTLNFEAAQK AATSRYTLNFEAAQK CDVMYGIEDTQDTVSLTVDGVVFHYR LLASDAGLYR VSVPTHPEAVGDASLTVVK YTLNFEAAQK CDVMYGIEDTQDTVSLTVDGVVFHYR LLASDAGLYR VSVPTHPEAVGDASLTVVK YTLNFEAAQK	LLASDAGLYR VSVPTHPEAVGDASLTVVK YTLNFEAAQK AATSRYTLNFEAAQK CDVMYGIEDTQDTVSLTVDGVVFHYR LLASDAGLYR VSVPTHPEAVGDASLTVVK YTLNFEAAQK CDVMYGIEDTQDTVSLTVDGVVFHYR LLASDAGLYR VSVPTHPEAVGDASLTVVK YTLNFEAAQK	28	30	66	108	128	113
VCAN	Versican core protein	CSPG2_HUMAN	100Step_Domain_p200.0_to_300.0	200	300	100.0 AA STEP	100	78	51	72	50	52	36	0.21	0	67	46	FTFEEAAK LATVGELQAAWR NGFDQCDYGWLSDASVR SPQETYDVYCYVDHLDGDVFHLTVPSK FTFEEAAK LATVGELQAAWR NGFDQCDYGWLSDASVR FTFEEAAK FTFEEAAKECENQDAR LATVGELQAAWR NGFDQCDYGWLSDASVR SPQETYDVYCYVDHLDGDVFHLTVPSK	FTFEEAAK FTFEEAAKECENQDAR LATVGELQAAWR NGFDQCDYGWLSDASVR FTFEEAAK FTFEEAAKECENQDAR LATVGELQAAWR NGFDQCDYGWLSDASVR SPQETYDVYCYVDHLDGDVFHLTVPSK FTFEEAAK FTFEEAAKECENQDAR LATVGELQAAWR NGFDQCDYGWLSDASVR	26	23	83	77	87	50
VCAN	Versican core protein	CSPG2_HUMAN	100Step_Domain_p300.0_to_400.0	300	400	100.0 AA STEP	100	36	29	35	16	14	17	0.17	0	33	16	NGFDQCDYGWLSDASVR NGFDQCDYGWLSDASVR AQCGGGLLGVR NGFDQCDYGWLSDASVR	AQCGGGLLGVR NGFDQCDYGWLSDASVR AQCGGGLLGVR NGFDQCDYGWLSDASVR FENQTGFPPPDSR NGFDQCDYGWLSDASVR	12	13	40	25	23	23
VCAN	Versican core protein	CSPG2_HUMAN	100Step_Domain_p400.0_to_500.0	400	500	100.0 AA STEP	100	0	0	0	0	0	0	0	1	0	0			0	0	0	0	0	0
VCAN	Versican core protein	CSPG2_HUMAN	100Step_Domain_p500.0_to_600.0	500	600	100.0 AA STEP	100	0	0	0	0	0	0	0	1	0	0			0	0	0	0	0	0
VCAN	Versican core protein	CSPG2_HUMAN	100Step_Domain_p600.0_to_700.0	600	700	100.0 AA STEP	100	0	4	3	5	3	3	-0.02	1	2	4	ITEEFLGK ITEEFLGK	ITEEFLGK ITEEFLGK ITEEFLGK	0	2	3	7	5	4
VCAN	Versican core protein	CSPG2_HUMAN	100Step_Domain_p700.0_to_800.0	700	800	100.0 AA STEP	100	0	2	1	3	2	2	-0.01	1	1	2	TEEEVFSGMK TEEEVFSGMK	TEEEVFSGMK TEEEVFSGMK TEEEVFSGMK	0	1	1	4	4	3
VCAN	Versican core protein	CSPG2_HUMAN	100Step_Domain_p800.0_to_900.0	800	900	100.0 AA STEP	100	0	0	0	1	1	1	-0.01	1	0	1		QLEEVTDEDIAAHGK QLEEVTDEDIAAHGK QLEEVTDEDIAAHGK	0	0	0	1	2	2
VCAN	Versican core protein	CSPG2_HUMAN	100Step_Domain_p900.0_to_1000.0	900	1000	100.0 AA STEP	100	0	0	0	0	0	0	0	1	0	0			0	0	0	0	0	0
VCAN	Versican core protein	CSPG2_HUMAN	100Step_Domain_p1000.0_to_1100.0	1000	1100	100.0 AA STEP	100	0	0	0	0	0	0	0	1	0	0			0	0	0	0	0	0
VCAN	Versican core protein	CSPG2_HUMAN	100Step_Domain_p1100.0_to_1200.0	1100	1200	100.0 AA STEP	100	0	0	0	0	0	0	0	1	0	0			0	0	0	0	0	0
VCAN	Versican core protein	CSPG2_HUMAN	100Step_Domain_p1200.0_to_1300.0	1200	1300	100.0 AA STEP	100	0	0	0	0	0	0	0	1	0	0			0	0	0	0	0	0
VCAN	Versican core protein	CSPG2_HUMAN	100Step_Domain_p1300.0_to_1400.0	1300	1400	100.0 AA STEP	100	15	13	26	31	30	43	-0.17	0	18	35	MSDLSVIGHPIDSESK FHPDINVYIIEVR MSDLSVIGHPIDSESK FHPDINVYIIEVR MSDLSVIGHPIDSESK	MSDLSVIGHPIDSESK MSDLSVIGHPIDSESK MSDLSVIGHPIDSESK	5	6	30	48	50	59
VCAN	Versican core protein	CSPG2_HUMAN	100Step_Domain_p1400.0_to_1500.0	1400	1500	100.0 AA STEP	100	0	0	0	0	0	0	0	1	0	0			0	0	0	0	0	0
VCAN	Versican core protein	CSPG2_HUMAN	100Step_Domain_p1500.0_to_1600.0	1500	1600	100.0 AA STEP	100	0	0	0	0	1	1	-0.01	1	0	1		ATEVTFGEEVEK ATEVTFGEEVEK	0	0	0	0	1	1
VCAN	Versican core protein	CSPG2_HUMAN	100Step_Domain_p1600.0_to_1700.0	1600	1700	100.0 AA STEP	100	0	0	0	0	0	0	0	1	0	0			0	0	0	0	0	0
VCAN	Versican core protein	CSPG2_HUMAN	100Step_Domain_p1700.0_to_1800.0	1700	1800	100.0 AA STEP	100	0	0	0	0	0	0	0	1	0	0			0	0	0	0	0	0
VCAN	Versican core protein	CSPG2_HUMAN	100Step_Domain_p1800.0_to_1900.0	1800	1900	100.0 AA STEP	100	0	0	0	0	0	0	0	1	0	0			0	0	0	0	0	0
VCAN	Versican core protein	CSPG2_HUMAN	100Step_Domain_p1900.0_to_2000.0	1900	2000	100.0 AA STEP	100	3	4	3	4	3	4	-0.01	1	3	4	LGEPNYGAEIR LGEPNYGAEIR LGEPNYGAEIR	LGEPNYGAEIR LGEPNYGAEIR LGEPNYGAEIR	1	2	3	6	5	5
VCAN	Versican core protein	CSPG2_HUMAN	100Step_Domain_p2000.0_to_2100.0	2000	2100	100.0 AA STEP	100	0	0	0	0	0	0	0	1	0	0			0	0	0	0	0	0
VCAN	Versican core protein	CSPG2_HUMAN	100Step_Domain_p2100.0_to_2200.0	2100	2200	100.0 AA STEP	100	9	9	7	19	19	15	-0.1	0.272	8	18	QEIESETTSEEQIQEEK QEIESETTSEEQIQEEK QEVNPVRQEIESETTSEEQIQEEK QEIESETTSEEQIQEEK	QEIESETTSEEQIQEEK QEVNPVRQEIESETTSEEQIQEEK QEIESETTSEEQIQEEK QEVNPVRQEIESETTSEEQIQEEK QEIESETTSEEQIQEEK QEVNPVRQEIESETTSEEQIQEEK	3	4	8	30	31	21
VCAN	Versican core protein	CSPG2_HUMAN	100Step_Domain_p2200.0_to_2300.0	2200	2300	100.0 AA STEP	100	0	0	0	0	0	0	0	1	0	0			0	0	0	0	0	0
VCAN	Versican core protein	CSPG2_HUMAN	100Step_Domain_p2300.0_to_2400.0	2300	2400	100.0 AA STEP	100	0	0	0	0	0	0	0	1	0	0			0	0	0	0	0	0
VCAN	Versican core protein	CSPG2_HUMAN	100Step_Domain_p2400.0_to_2500.0	2400	2500	100.0 AA STEP	100	0	0	0	0	0	0	0	1	0	0			0	0	0	0	0	0
VCAN	Versican core protein	CSPG2_HUMAN	100Step_Domain_p2500.0_to_2600.0	2500	2600	100.0 AA STEP	100	0	0	0	0	0	0	0	1	0	0			0	0	0	0	0	0
VCAN	Versican core protein	CSPG2_HUMAN	100Step_Domain_p2600.0_to_2700.0	2600	2700	100.0 AA STEP	100	0	0	0	0	0	0	0	1	0	0			0	0	0	0	0	0
VCAN	Versican core protein	CSPG2_HUMAN	100Step_Domain_p2700.0_to_2800.0	2700	2800	100.0 AA STEP	100	0	0	0	0	0	0	0	1	0	0			0	0	0	0	0	0
VCAN	Versican core protein	CSPG2_HUMAN	100Step_Domain_p2800.0_to_2900.0	2800	2900	100.0 AA STEP	100	0	0	0	0	0	0	0	1	0	0			0	0	0	0	0	0
VCAN	Versican core protein	CSPG2_HUMAN	100Step_Domain_p2900.0_to_3000.0	2900	3000	100.0 AA STEP	100	0	0	0	0	0	0	0	1	0	0			0	0	0	0	0	0
VCAN	Versican core protein	CSPG2_HUMAN	100Step_Domain_p3000.0_to_3100.0	3000	3100	100.0 AA STEP	100	0	0	1	1	1	0	-0.01	1	0	1	GQDSTIAASEQQVAAR	GQDSTIAASEQQVAAR GQDSTIAASEQQVAAR	0	0	1	1	1	0
VCAN	Versican core protein	CSPG2_HUMAN	100Step_Domain_p3100.0_to_3200.0	3100	3200	100.0 AA STEP	100	0	33	17	1	3	1	0.15	0	17	2	LQGAHLTSILSHEEQMFVNR LQGAHLTSILSHEEQMFVNR NGATCVDGFNTFR	NGATCVDGFNTFR LQGAHLTSILSHEEQMFVNR NGATCVDGFNTFR NGATCVDGFNTFR	0	15	20	2	5	1
VCAN	Versican core protein	CSPG2_HUMAN	100Step_Domain_p3200.0_to_3300.0	3200	3300	100.0 AA STEP	100	3	38	19	8	2	6	0.15	0	20	5	VGHDYQWIGLNDK LQGAHLTSILSHEEQMFVNR VGHDYQWIGLNDK LQGAHLTSILSHEEQMFVNR VGHDYQWIGLNDK	VGHDYQWIGLNDK LQGAHLTSILSHEEQMFVNR VGHDYQWIGLNDK VGHDYQWIGLNDK	1	17	22	13	3	8
VCAN	Versican core protein	CSPG2_HUMAN	100Step_Domain_p3300.0_to_3396.0	3300	3396	100.0 AA STEP	96	3	7	3	2	1	1	0.03125	1	4	1	YEINSLIR YEINSLIR YEINSLIR	YEINSLIR YEINSLIR YEINSLIR	1	3	3	3	2	2
CSPG2	Chondroitin sulfate proteoglycan 2 (Versican); isoform CRA_b	A0A024RAQ9_HUMAN	Disordered	420	439	REGIONS	19	0	0	0	0	0	0	0	1	0	0			0	0	0	0	0	0
CSPG2	Chondroitin sulfate proteoglycan 2 (Versican); isoform CRA_b	A0A024RAQ9_HUMAN	Disordered_603_622	603	622	REGIONS	19	0	0	0	0	0	0	0	1	0	0			0	0	0	0	0	0
CSPG2	Chondroitin sulfate proteoglycan 2 (Versican); isoform CRA_b	A0A024RAQ9_HUMAN	Disordered_807_829	807	829	REGIONS	22	0	0	0	0	0	0	0	1	0	0			0	0	0	0	0	0
CSPG2	Chondroitin sulfate proteoglycan 2 (Versican); isoform CRA_b	A0A024RAQ9_HUMAN	Disordered_1126_1154	1126	1154	REGIONS	28	0	0	0	0	0	0	0	1	0	0			0	0	0	0	0	0
CSPG2	Chondroitin sulfate proteoglycan 2 (Versican); isoform CRA_b	A0A024RAQ9_HUMAN	Disordered_1277_1316	1277	1316	REGIONS	39	0	0	0	0	0	0	0	1	0	0			0	0	0	0	0	0
CSPG2	Chondroitin sulfate proteoglycan 2 (Versican); isoform CRA_b	A0A024RAQ9_HUMAN	Disordered_1420_1497	1420	1497	REGIONS	77	0	0	0	0	0	0	0	1	0	0			0	0	0	0	0	0
CSPG2	Chondroitin sulfate proteoglycan 2 (Versican); isoform CRA_b	A0A024RAQ9_HUMAN	Disordered_1510_1539	1510	1539	REGIONS	29	0	0	0	0	0	0	0	1	0	0			0	0	0	0	0	0
CSPG2	Chondroitin sulfate proteoglycan 2 (Versican); isoform CRA_b	A0A024RAQ9_HUMAN	Disordered_1717_1737	1717	1737	REGIONS	20	0	0	0	0	0	0	0	1	0	0			0	0	0	0	0	0
CSPG2	Chondroitin sulfate proteoglycan 2 (Versican); isoform CRA_b	A0A024RAQ9_HUMAN	Disordered_1759_1789	1759	1789	REGIONS	30	0	0	0	0	0	0	0	1	0	0			0	0	0	0	0	0
CSPG2	Chondroitin sulfate proteoglycan 2 (Versican); isoform CRA_b	A0A024RAQ9_HUMAN	Disordered_1962_1994	1962	1994	REGIONS	32	0	0	0	0	0	0	0	1	0	0			0	0	0	0	0	0
CSPG2	Chondroitin sulfate proteoglycan 2 (Versican); isoform CRA_b	A0A024RAQ9_HUMAN	Disordered_2107_2134	2107	2134	REGIONS	27	9	9	7	19	19	15	-0.37037	0	8	18	QEIESETTSEEQIQEEK QEIESETTSEEQIQEEK QEVNPVRQEIESETTSEEQIQEEK QEIESETTSEEQIQEEK	QEIESETTSEEQIQEEK QEVNPVRQEIESETTSEEQIQEEK QEIESETTSEEQIQEEK QEVNPVRQEIESETTSEEQIQEEK QEIESETTSEEQIQEEK QEVNPVRQEIESETTSEEQIQEEK	3	4	8	30	31	21
CSPG2	Chondroitin sulfate proteoglycan 2 (Versican); isoform CRA_b	A0A024RAQ9_HUMAN	Disordered_2168_2188	2168	2188	REGIONS	20	0	0	0	0	0	0	0	1	0	0			0	0	0	0	0	0
CSPG2	Chondroitin sulfate proteoglycan 2 (Versican); isoform CRA_b	A0A024RAQ9_HUMAN	Disordered_2371_2396	2371	2396	REGIONS	25	0	0	0	0	0	0	0	1	0	0			0	0	0	0	0	0
CSPG2	Chondroitin sulfate proteoglycan 2 (Versican); isoform CRA_b	A0A024RAQ9_HUMAN	Disordered_2445_2473	2445	2473	REGIONS	28	0	0	0	0	0	0	0	1	0	0			0	0	0	0	0	0
CSPG2	Chondroitin sulfate proteoglycan 2 (Versican); isoform CRA_b	A0A024RAQ9_HUMAN	Disordered_2493_2518	2493	2518	REGIONS	25	0	0	0	0	0	0	0	1	0	0			0	0	0	0	0	0
CSPG2	Chondroitin sulfate proteoglycan 2 (Versican); isoform CRA_b	A0A024RAQ9_HUMAN	Disordered_2598_2617	2598	2617	REGIONS	19	0	0	0	0	0	0	0	1	0	0			0	0	0	0	0	0
CSPG2	Chondroitin sulfate proteoglycan 2 (Versican); isoform CRA_b	A0A024RAQ9_HUMAN	Disordered_2834_2856	2834	2856	REGIONS	22	0	0	0	0	0	0	0	1	0	0			0	0	0	0	0	0
CSPG2	Chondroitin sulfate proteoglycan 2 (Versican); isoform CRA_b	A0A024RAQ9_HUMAN	Disordered_2881_2905	2881	2905	REGIONS	24	0	0	0	0	0	0	0	1	0	0			0	0	0	0	0	0
CSPG2	Chondroitin sulfate proteoglycan 2 (Versican); isoform CRA_b	A0A024RAQ9_HUMAN	Disordered_3371_3396	3371	3396	REGIONS	25	0	0	0	0	0	0	0	1	0	0			0	0	0	0	0	0
CSPG2	Chondroitin sulfate proteoglycan 2 (Versican); isoform CRA_b	A0A024RAQ9_HUMAN	Ig-like	34	146	DOMAINS	112	63	42	44	54	56	63	-0.0714286	1	50	58	CDVMYGIEDTQDTVSLTVDGVVFHYR LLASDAGLYR VSVPTHPEAVGDASLTVVK CDVMYGIEDTQDTVSLTVDGVVFHYR LLASDAGLYR VSVPTHPEAVGDASLTVVK CDVMYGIEDTQDTVSLTVDGVVFHYR ETTVLVAQNGNIK LLASDAGLYR VSVPTHPEAVGDASLTVVK	LLASDAGLYR VSVPTHPEAVGDASLTVVK CDVMYGIEDTQDTVSLTVDGVVFHYR LLASDAGLYR VSVPTHPEAVGDASLTVVK CDVMYGIEDTQDTVSLTVDGVVFHYR LLASDAGLYR VSVPTHPEAVGDASLTVVK	21	19	51	83	94	88
CSPG2	Chondroitin sulfate proteoglycan 2 (Versican); isoform CRA_b	A0A024RAQ9_HUMAN	Link	150	245	DOMAINS	95	30	31	29	16	22	19	0.115789	0.5586	30	19	CDVMYGIEDTQDTVSLTVDGVVFHYR SPQETYDVYCYVDHLDGDVFHLTVPSK YTLNFEAAQK AATSRYTLNFEAAQK CDVMYGIEDTQDTVSLTVDGVVFHYR YTLNFEAAQK CDVMYGIEDTQDTVSLTVDGVVFHYR SPQETYDVYCYVDHLDGDVFHLTVPSK YTLNFEAAQK	YTLNFEAAQK AATSRYTLNFEAAQK CDVMYGIEDTQDTVSLTVDGVVFHYR SPQETYDVYCYVDHLDGDVFHLTVPSK YTLNFEAAQK CDVMYGIEDTQDTVSLTVDGVVFHYR YTLNFEAAQK	10	14	33	25	37	26
CSPG2	Chondroitin sulfate proteoglycan 2 (Versican); isoform CRA_b	A0A024RAQ9_HUMAN	Link_251_347	251	347	DOMAINS	96	78	51	73	50	53	37	0.208333	0.014	67	47	FTFEEAAK LATVGELQAAWR NGFDQCDYGWLSDASVR SPQETYDVYCYVDHLDGDVFHLTVPSK FTFEEAAK LATVGELQAAWR NGFDQCDYGWLSDASVR AQCGGGLLGVR FTFEEAAK FTFEEAAKECENQDAR LATVGELQAAWR NGFDQCDYGWLSDASVR SPQETYDVYCYVDHLDGDVFHLTVPSK	AQCGGGLLGVR FTFEEAAK FTFEEAAKECENQDAR LATVGELQAAWR NGFDQCDYGWLSDASVR AQCGGGLLGVR FTFEEAAK FTFEEAAKECENQDAR LATVGELQAAWR NGFDQCDYGWLSDASVR SPQETYDVYCYVDHLDGDVFHLTVPSK FENQTGFPPPDSR FTFEEAAK FTFEEAAKECENQDAR LATVGELQAAWR NGFDQCDYGWLSDASVR	26	23	85	78	89	51
CSPG2	Chondroitin sulfate proteoglycan 2 (Versican); isoform CRA_b	A0A024RAQ9_HUMAN	EGF-like	3089	3125	DOMAINS	36	0	0	0	0	0	0	0	1	0	0			0	0	0	0	0	0
CSPG2	Chondroitin sulfate proteoglycan 2 (Versican); isoform CRA_b	A0A024RAQ9_HUMAN	EGF-like_3127_3163	3127	3163	DOMAINS	36	0	0	2	1	2	1	0	1	1	1	NGATCVDGFNTFR	NGATCVDGFNTFR NGATCVDGFNTFR NGATCVDGFNTFR	0	0	2	2	3	1
CSPG2	Chondroitin sulfate proteoglycan 2 (Versican); isoform CRA_b	A0A024RAQ9_HUMAN	C-type lectin	3176	3290	DOMAINS	114	3	38	19	8	2	6	0.131579	0.1547	20	5	VGHDYQWIGLNDK LQGAHLTSILSHEEQMFVNR VGHDYQWIGLNDK LQGAHLTSILSHEEQMFVNR VGHDYQWIGLNDK	VGHDYQWIGLNDK LQGAHLTSILSHEEQMFVNR VGHDYQWIGLNDK VGHDYQWIGLNDK	1	17	22	13	3	8
CSPG2	Chondroitin sulfate proteoglycan 2 (Versican); isoform CRA_b	A0A024RAQ9_HUMAN	Sushi	3294	3354	DOMAINS	60	3	7	3	2	1	1	0.05	1	4	1	YEINSLIR YEINSLIR YEINSLIR	YEINSLIR YEINSLIR YEINSLIR	1	3	3	3	2	2
TTN	Titin	TITIN_HUMAN	50Step_Domain_p6250.0_to_6300.0	6250	6300	50.0 AA STEP	50	0	0	0	1	0	0	0	0	0	0		DDVELVSGPK	0	0	0	1	0	0
TTN	Titin	TITIN_HUMAN	50Step_Domain_p6300.0_to_6350.0	6300	6350	50.0 AA STEP	50	0	0	0	1	0	0	0	0	0	0		DDVELVSGPK	0	0	0	1	0	0
TTN	Titin	TITIN_HUMAN	50Step_Domain_p6400.0_to_6450.0	6400	6450	50.0 AA STEP	50	0	0	0	1	0	0	0	0	0	0		EPPVFSSFPPIVETLK	0	0	0	1	0	0
TTN	Titin	TITIN_HUMAN	50Step_Domain_p6450.0_to_6500.0	6450	6500	50.0 AA STEP	50	0	0	0	1	0	0	0	0	0	0		EPPVFSSFPPIVETLK	0	0	0	1	0	0
TTN	Titin	TITIN_HUMAN	50Step_Domain_p9150.0_to_9200.0	9150	9200	50.0 AA STEP	50	0	0	0	1	0	0	0	0	0	0		LSETVEETEGNSFK	0	0	0	1	0	0
TTN	Titin	TITIN_HUMAN	50Step_Domain_p9700.0_to_9750.0	9700	9750	50.0 AA STEP	50	0	0	0	1	0	0	0	0	0	0		YEDLETSAELR	0	0	0	1	0	0
TTN	Titin	TITIN_HUMAN	50Step_Domain_p9750.0_to_9800.0	9750	9800	50.0 AA STEP	50	0	0	0	1	0	0	0	0	0	0		YEDLETSAELR	0	0	0	1	0	0
TTN	Titin	TITIN_HUMAN	50Step_Domain_p12450.0_to_12500.0	12450	12500	50.0 AA STEP	50	0	0	0	1	0	0	0	0	0	0		FDIIADGK	0	0	0	1	0	0
TTN	Titin	TITIN_HUMAN	50Step_Domain_p12600.0_to_12650.0	12600	12650	50.0 AA STEP	50	0	0	0	1	0	0	0	0	0	0		DGEEIVPSPK	0	0	0	1	0	0
TTN	Titin	TITIN_HUMAN	50Step_Domain_p14050.0_to_14100.0	14050	14100	50.0 AA STEP	50	0	0	0	1	0	0	0	0	0	0		VGTGEPVETDNPVEAR	0	0	0	1	0	0
TTN	Titin	TITIN_HUMAN	50Step_Domain_p14100.0_to_14150.0	14100	14150	50.0 AA STEP	50	0	0	0	1	0	0	0	0	0	0		VGTGEPVETDNPVEAR	0	0	0	1	0	0
TTN	Titin	TITIN_HUMAN	50Step_Domain_p17400.0_to_17450.0	17400	17450	50.0 AA STEP	50	0	0	0	1	0	0	0	0	0	0		LVSPDLQLDASVR	0	0	0	1	0	0
TTN	Titin	TITIN_HUMAN	50Step_Domain_p17450.0_to_17500.0	17450	17500	50.0 AA STEP	50	0	0	0	1	0	0	0	0	0	0		LVSPDLQLDASVR	0	0	0	1	0	0
TTN	Titin	TITIN_HUMAN	50Step_Domain_p20550.0_to_20600.0	20550	20600	50.0 AA STEP	50	0	0	0	1	0	0	0	0	0	0		IGYSDPSDVPDK	0	0	0	1	0	0
TTN	Titin	TITIN_HUMAN	50Step_Domain_p20600.0_to_20650.0	20600	20650	50.0 AA STEP	50	0	0	0	1	0	0	0	0	0	0		IGYSDPSDVPDK	0	0	0	1	0	0
TTN	Titin	TITIN_HUMAN	50Step_Domain_p20750.0_to_20800.0	20750	20800	50.0 AA STEP	50	0	0	0	1	0	0	0	0	0	0		VFAENEYGIGDPGETR	0	0	0	1	0	0
TTN	Titin	TITIN_HUMAN	50Step_Domain_p20800.0_to_20850.0	20800	20850	50.0 AA STEP	50	0	0	0	1	0	0	0	0	0	0		VFAENEYGIGDPGETR	0	0	0	1	0	0
TTN	Titin	TITIN_HUMAN	50Step_Domain_p21000.0_to_21050.0	21000	21050	50.0 AA STEP	50	0	0	0	1	0	0	0	0	0	0		DDGGSEITNYILEK	0	0	0	1	0	0
TTN	Titin	TITIN_HUMAN	50Step_Domain_p23650.0_to_23700.0	23650	23700	50.0 AA STEP	50	0	0	0	1	0	0	0	0	0	0		NPFVVPDAPK	0	0	0	1	0	0
TTN	Titin	TITIN_HUMAN	50Step_Domain_p24900.0_to_24950.0	24900	24950	50.0 AA STEP	50	0	0	0	1	0	0	0	0	0	0		LEAPELDLDSELR	0	0	0	1	0	0
TTN	Titin	TITIN_HUMAN	50Step_Domain_p24950.0_to_25000.0	24950	25000	50.0 AA STEP	50	0	0	0	1	0	0	0	0	0	0		LEAPELDLDSELR	0	0	0	1	0	0
TTN	Titin	TITIN_HUMAN	50Step_Domain_p27050.0_to_27100.0	27050	27100	50.0 AA STEP	50	0	0	0	1	0	0	0	0	0	0		VGASDPSDSSDPQIAK	0	0	0	1	0	0
TTN	Titin	TITIN_HUMAN	50Step_Domain_p27100.0_to_27150.0	27100	27150	50.0 AA STEP	50	0	0	0	1	0	0	0	0	0	0		VGASDPSDSSDPQIAK	0	0	0	1	0	0
TTN	Titin	TITIN_HUMAN	50Step_Domain_p30850.0_to_30900.0	30850	30900	50.0 AA STEP	50	0	0	0	1	0	0	0	0	0	0		IPGPPETLQIFDVSR	0	0	0	1	0	0
TTN	Titin	TITIN_HUMAN	50Step_Domain_p30900.0_to_30950.0	30900	30950	50.0 AA STEP	50	0	0	0	1	0	0	0	0	0	0		STGLTEGLEYEHR	0	0	0	1	0	0
TTN	Titin	TITIN_HUMAN	50Step_Domain_p32750.0_to_32800.0	32750	32800	50.0 AA STEP	50	0	0	0	1	0	0	0	0	0	0		DTLPEDTGYYR	0	0	0	1	0	0
N/A	Transthyretin	A6XGL1_HUMAN	50Step_Domain_p100.0_to_150.0	100	150	50.0 AA STEP	50	21	14	11	0	0	0	0.3	0.0004	15	0	ALGISPFHEHAEVVFTANDSGPR ALGISPFHEHAEVVFTANDSGPR ALGISPFHEHAEVVFTANDSGPR		41	28	4	0	0	0
C8G	Complement component C8 gamma chain	CO8G_HUMAN	50Step_Domain_p150.0_to_200.0	150	200	50.0 AA STEP	50	7	8	4	0	0	0	0.12	0.0005	6	0	SLPVSDSVLSGFEQR VQEAHLTEDQIFYFPK SLPVSDSVLSGFEQR VQEAHLTEDQIFYFPK SLPVSDSVLSGFEQR		13	13	1	0	0	0
CFHR1	Complement factor H-related protein 1	FHR1_HUMAN	50Step_Domain_p0_to_50	0	50	50.0 AA STEP	50	3	3	0	0	0	0	0.04	0.0007	2	0	INHGILYDEEK INHGILYDEEK		5	4	0	0	0	0
N/A	Transaldolase	A0A140VK56_HUMAN	50Step_Domain_p250.0_to_300.0	250	300	50.0 AA STEP	50	0	0	1	2	1	2	-0.04	0.0007	0	2	LLGELLQDNAK	LLGELLQDNAK LLGELLQDNAK LLGELLQDNAK	0	0	1	3	1	2
TALDO1	Transaldolase	TALDO_HUMAN	50Step_Domain_p250.0_to_300.0	250	300	50.0 AA STEP	50	0	0	1	2	1	2	-0.04	0.0007	0	2	LLGELLQDNAK	LLGELLQDNAK LLGELLQDNAK LLGELLQDNAK	0	0	1	3	1	2
SERPINE2	Glia-derived nexin	GDN_HUMAN	50Step_Domain_p150.0_to_200.0	150	200	50.0 AA STEP	50	11	20	23	38	31	32	-0.32	0.0008	18	34	DMIDNLLSPDLIDGVLTR NVNFEDPASACDSINAWVK DMIDNLLSPDLIDGVLTR LVLVNAVYFK NVNFEDPASACDSINAWVK DMIDNLLSPDLIDGVLTR LVLVNAVYFK NVNFEDPASACDSINAWVK	DMIDNLLSPDLIDGVLTR LVLVNAVYFK NVNFEDPASACDSINAWVK DMIDNLLSPDLIDGVLTR NVNFEDPASACDSINAWVK DMIDNLLSPDLIDGVLTR NVNFEDPASACDSINAWVK	9	27	29	32	21	37
SERPINA1	Alpha-1-antitrypsin	A1AT_HUMAN	50Step_Domain_p300.0_to_350.0	300	350	50.0 AA STEP	50	34	20	39	76	82	68	-0.88	0.0009	31	75	LSITGTYDLK SASLHLPK SVLGQLGITK VFSNGADLSGVTEEAPLK LSITGTYDLK SASLHLPK SVLGQLGITK VFSNGADLSGVTEEAPLK LSITGTYDLK SVLGQLGITK VFSNGADLSGVTEEAPLK	LSITGTYDLK SVLGQLGITK VFSNGADLSGVTEEAPLK FLENEDRR LSITGTYDLK SASLHLPK SVLGQLGITK VFSNGADLSGVTEEAPLK LSITGTYDLK SVLGQLGITK VFSNGADLSGVTEEAPLK	48	32	17	28	34	31
SERPINA7	Thyroxine-binding globulin	THBG_HUMAN	50Step_Domain_p200.0_to_250.0	200	250	50.0 AA STEP	50	3	3	0	0	0	0	0.04	0.0009	2	0	AQWANPFDPSK TEDSSSFLIDK AQWANPFDPSK TEDSSSFLIDK		5	4	0	0	0	0
KNG1	Kininogen 1; isoform CRA_a	D3DNU8_HUMAN	50Step_Domain_p250.0_to_300.0	250	300	50.0 AA STEP	50	9	5	5	0	0	0	0.12	0.0009	6	0	DFVQPPTK DIPTNSPELEETLTHTITK IASFSQNCDIYPGK IASFSQNCDIYPGKDFVQPPTK DFVQPPTK DIPTNSPELEETLTHTITK IASFSQNCDIYPGK DIPTNSPELEETLTHTITK		17	8	1	0	0	0
N/A	Tubulin alpha chain	B3KT06_HUMAN	50Step_Domain_p350.0_to_400.0	350	400	50.0 AA STEP	50	0	0	0	1	1	2	-0.02	0.0009	0	1		DYEEVGVDSVEGEGEEEGEEY EDMAALEK DYEEVGVDSVEGEGEEEGEEY EDMAALEK	0	0	0	1	1	3
VWA1	von Willebrand factor A domain-containing protein 1	VWA1_HUMAN	50Step_Domain_p150.0_to_200.0	150	200	50.0 AA STEP	50	0	0	0	1	1	1	-0.02	0.0009	0	1		GNFLELSAAASAPAEK GNFLELSAAASAPAEK GNFLELSAAASAPAEK	0	0	0	1	1	1
CHRDL2	Chordin-like protein 2	CRDL2_HUMAN	50Step_Domain_p150.0_to_200.0	150	200	50.0 AA STEP	50	0	0	8	15	13	13	-0.22	0.0009	3	14	DEASEQSDEEDSVQSLHGVR	DEASEQSDEEDSVQSLHGVR DEASEQSDEEDSVQSLHGVR DEASEQSDEEDSVQSLHGVR	0	0	6	29	26	21
TUBB4B	Tubulin beta-4B chain	TBB4B_HUMAN	50Step_Domain_p200.0_to_250.0	200	250	50.0 AA STEP	50	0	0	0	2	2	1	-0.04	0.0009	0	2		FPGQLNADLR FPGQLNADLR FPGQLNADLR	0	0	0	3	1	1
TUBB4B	Tubulin beta-4B chain	TBB4B_HUMAN	50Step_Domain_p250.0_to_300.0	250	300	50.0 AA STEP	50	0	0	0	2	2	1	-0.04	0.0009	0	2		FPGQLNADLR FPGQLNADLR FPGQLNADLR	0	0	0	3	1	1
TUBB2C	Tubulin beta chain	Q8IZ29_HUMAN	50Step_Domain_p200.0_to_250.0	200	250	50.0 AA STEP	50	0	0	0	2	2	1	-0.04	0.0009	0	2		FPGQLNADLR FPGQLNADLR FPGQLNADLR	0	0	0	3	1	1
TUBB2C	Tubulin beta chain	Q8IZ29_HUMAN	50Step_Domain_p250.0_to_300.0	250	300	50.0 AA STEP	50	0	0	0	2	2	1	-0.04	0.0009	0	2		FPGQLNADLR FPGQLNADLR FPGQLNADLR	0	0	0	3	1	1
N/A	Immunoglobulin alpha-2 heavy chain	IGA2_HUMAN	50Step_Domain_p0_to_50	0	50	50.0 AA STEP	50	3	4	0	0	0	0	0.04	0.001	2	0	EVQLVETGGGLIQPGGSLR EVQLVETGGGLIQPGGSLR		5	5	0	0	0	0
LBP	Lipopolysaccharide-binding protein	LBP_HUMAN	50Step_Domain_p450.0_to_481.0	450	481	50.0 AA STEP	31	4	5	3	0	0	0	0.129032	0.001	4	0	LAEGFPLPLLK VQLYDLGLQIHK DFLFLGANVQYMR LAEGFPLPLLK VQLYDLGLQIHK VQLYDLGLQIHK		7	7	1	0	0	0
FGB	Fibrinogen beta chain	FIBB_HUMAN	50Step_Domain_p150.0_to_200.0	150	200	50.0 AA STEP	50	30	34	57	0	0	0	0.8	0.001	40	0	DNENVVNEYSSELEK HQLYIDETVNSNIPTNLR NSVDELNNNVEAVSQTSSSSFQYMYLLK QVKDNENVVNEYSSELEK DNENVVNEYSSELEK HQLYIDETVNSNIPTNLR NSVDELNNNVEAVSQTSSSSFQYMYLLK QVKDNENVVNEYSSELEK HQLYIDETVNSNIPTNLR		60	22	3	0	0	0
HEL-S-78p	Fibrinogen beta chain	V9HVY1_HUMAN	50Step_Domain_p150.0_to_200.0	150	200	50.0 AA STEP	50	30	34	57	0	0	0	0.8	0.001	40	0	DNENVVNEYSSELEK HQLYIDETVNSNIPTNLR NSVDELNNNVEAVSQTSSSSFQYMYLLK QVKDNENVVNEYSSELEK DNENVVNEYSSELEK HQLYIDETVNSNIPTNLR NSVDELNNNVEAVSQTSSSSFQYMYLLK QVKDNENVVNEYSSELEK HQLYIDETVNSNIPTNLR		60	22	3	0	0	0
AGT	Angiotensinogen	ANGT_HUMAN	50Step_Domain_p150.0_to_200.0	150	200	50.0 AA STEP	50	2	2	5	0	0	2	0.04	0.001	3	1	VLSALQAVQGLLVAQGR ADSQAQLLLSTVVGVFTAPGLHLK LQAILGVPWK VLSALQAVQGLLVAQGR LQAILGVPWK VLSALQAVQGLLVAQGR	VLSALQAVQGLLVAQGR	2	4	4	0	0	1
N/A	Angiotensin 1-10	Q53GY3_HUMAN	50Step_Domain_p150.0_to_200.0	150	200	50.0 AA STEP	50	2	2	5	0	0	2	0.04	0.001	3	1	VLSALQAVQGLLVAQGR ADSQAQLLLSTVVGVFTAPGLHLK LQAILGVPWK VLSALQAVQGLLVAQGR LQAILGVPWK VLSALQAVQGLLVAQGR	VLSALQAVQGLLVAQGR	2	4	4	0	0	1
N/A	Angiotensin 1-10	Q86U78_HUMAN	50Step_Domain_p150.0_to_200.0	150	200	50.0 AA STEP	50	2	2	5	0	0	2	0.04	0.001	3	1	VLSALQAVQGLLVAQGR ADSQAQLLLSTVVGVFTAPGLHLK LQAILGVPWK VLSALQAVQGLLVAQGR LQAILGVPWK VLSALQAVQGLLVAQGR	VLSALQAVQGLLVAQGR	2	4	4	0	0	1
SERPINC1	Antithrombin-III	ANT3_HUMAN	50Step_Domain_p100.0_to_150.0	100	150	50.0 AA STEP	50	9	10	3	0	0	0	0.14	0.001	7	0	FATTFYQHLADSK NDNDNIFLSPLSISTAFAMTK TSDQIHFFFAK FATTFYQHLADSK LGACNDTLQQLMEVFK NDNDNIFLSPLSISTAFAMTK TSDQIHFFFAK FATTFYQHLADSK		17	19	1	0	0	0
CPN1	Carboxypeptidase N catalytic chain	CBPN_HUMAN	50Step_Domain_p300.0_to_350.0	300	350	50.0 AA STEP	50	1	2	0	0	0	0	0.02	0.001	1	0	EALIQFLEQVHQGIK EALIQFLEQVHQGIK		1	3	0	0	0	0
F9 p22	Christmas factor	F2RM37_HUMAN	50Step_Domain_p350.0_to_400.0	350	400	50.0 AA STEP	50	2	2	0	0	0	0	0.02	0.001	1	0	FGSGYVSGWGR SALVLQYLR SALVLQYLR		4	2	0	0	0	0
F9	Coagulation factor IX	FA9_HUMAN	50Step_Domain_p350.0_to_400.0	350	400	50.0 AA STEP	50	2	2	0	0	0	0	0.02	0.001	1	0	FGSGYVSGWGR SALVLQYLR SALVLQYLR		4	2	0	0	0	0
N/A	Nucleobindin-1	A8K7Q1_HUMAN	50Step_Domain_p350.0_to_400.0	350	400	50.0 AA STEP	50	0	1	1	5	2	3	-0.04	0.001	1	3	FEEELAAR FEEELAAR LSQETEALGR	ELQQAVLHMEQR FEEELAAR LSQETEALGR FEEELAAR LSQETEALGR FEEELAAR LSQETEALGR	0	1	2	3	2	3
NUCB1	Nucleobindin-1	NUCB1_HUMAN	50Step_Domain_p350.0_to_400.0	350	400	50.0 AA STEP	50	0	1	1	5	2	3	-0.04	0.001	1	3	FEEELAAR FEEELAAR LSQETEALGR	ELQQAVLHMEQR FEEELAAR LSQETEALGR FEEELAAR LSQETEALGR FEEELAAR LSQETEALGR	0	1	2	3	2	3
N/A	Nucleobindin-1	Q53GX6_HUMAN	50Step_Domain_p350.0_to_400.0	350	400	50.0 AA STEP	50	0	1	1	5	2	3	-0.04	0.001	1	3	FEEELAAR FEEELAAR LSQETEALGR	ELQQAVLHMEQR FEEELAAR LSQETEALGR FEEELAAR LSQETEALGR FEEELAAR LSQETEALGR	0	1	2	3	2	3
DNAJC3	DnaJ homolog subfamily C member 3	DNJC3_HUMAN	50Step_Domain_p300.0_to_350.0	300	350	50.0 AA STEP	50	0	0	0	3	3	3	-0.06	0.0011	0	3		DEKPVEAIR TEPSIAEYTVR DEKPVEAIR TEPSIAEYTVR DEKPVEAIR	0	0	0	3	2	2
N/A	cDNA FLJ51597; highly similar to C4b-binding protein alpha chain	B4E1D8_HUMAN	50Step_Domain_p250.0_to_300.0	250	300	50.0 AA STEP	50	2	1	3	0	0	0	0.04	0.0011	2	0	EDVYVVGTVLR EDVYVVGTVLR EDVYVVGTVLR		4	1	1	0	0	0
OAF	Out at first protein homolog	OAF_HUMAN	50Step_Domain_p50.0_to_100.0	50	100	50.0 AA STEP	50	13	15	16	4	5	9	0.18	0.0012	15	6	ALILGELEK LPDGQVTEESLQADSDADSISLELR ALILGELEK KPDGTLVSFTADFK ALILGELEK KPDGTLVSFTADFK LPDGQVTEESLQADSDADSISLELR VRLPDGQVTEESLQADSDADSISLELR	ALILGELEK ALILGELEK LPDGQVTEESLQADSDADSISLELR ALILGELEK LPDGQVTEESLQADSDADSISLELR	7	6	26	2	3	7
N/A	cDNA FLJ60461; highly similar to Peroxiredoxin-2	B4DF70_HUMAN	50Step_Domain_p100.0_to_150.0	100	150	50.0 AA STEP	50	3	0	0	5	6	5	-0.08	0.0012	1	5	EGGLGPLNIPLLADVTR	EGGLGPLNIPLLADVTR LSEDYGVLK TDEGIAYR EGGLGPLNIPLLADVTR LSEDYGVLK EGGLGPLNIPLLADVTR LSEDYGVLK TDEGIAYR	1	0	0	9	3	6
PRDX2	Peroxiredoxin-2	PRDX2_HUMAN	50Step_Domain_p100.0_to_150.0	100	150	50.0 AA STEP	50	3	0	0	5	6	5	-0.08	0.0012	1	5	EGGLGPLNIPLLADVTR	EGGLGPLNIPLLADVTR LSEDYGVLK TDEGIAYR EGGLGPLNIPLLADVTR LSEDYGVLK EGGLGPLNIPLLADVTR LSEDYGVLK TDEGIAYR	1	0	0	9	3	6
HEL-S-2a	Epididymis secretory sperm binding protein Li 2a	V9HW12_HUMAN	50Step_Domain_p100.0_to_150.0	100	150	50.0 AA STEP	50	3	0	0	5	6	5	-0.08	0.0012	1	5	EGGLGPLNIPLLADVTR	EGGLGPLNIPLLADVTR LSEDYGVLK TDEGIAYR EGGLGPLNIPLLADVTR LSEDYGVLK EGGLGPLNIPLLADVTR LSEDYGVLK TDEGIAYR	1	0	0	9	3	6
N/A	Galectin-3-binding protein	B4DVE1_HUMAN	50Step_Domain_p300.0_to_350.0	300	350	50.0 AA STEP	50	2	2	0	0	0	0	0.02	0.0012	1	0	ASHEEVEGLVEK AVDTWSWGER AVDTWSWGER SDLAVPSELALLK		3	3	0	0	0	0
H1-0	Histone H1.0	H10_HUMAN	50Step_Domain_p50.0_to_100.0	50	100	50.0 AA STEP	50	0	0	0	3	5	3	-0.08	0.0012	0	4		LVTTGVLK VGENADSQIK LVTTGVLK VGENADSQIK VGENADSQIK	0	0	0	3	4	3
F12	Coagulation factor XII	FA12_HUMAN	50Step_Domain_p400.0_to_450.0	400	450	50.0 AA STEP	50	4	3	0	0	0	0	0.04	0.0013	2	0	LHEAFSPVSYQHDLALLR LHEAFSPVSYQHDLALLR		7	3	0	0	0	0
F12	Coagulation factor XII	FA12_HUMAN	50Step_Domain_p450.0_to_500.0	450	500	50.0 AA STEP	50	4	3	0	0	0	0	0.04	0.0013	2	0	LHEAFSPVSYQHDLALLR LHEAFSPVSYQHDLALLR		7	3	0	0	0	0
N/A	Coagulation factor XII-Mie	Q8IZZ5_HUMAN	50Step_Domain_p400.0_to_450.0	400	450	50.0 AA STEP	50	4	3	0	0	0	0	0.04	0.0013	2	0	LHEAFSPVSYQHDLALLR LHEAFSPVSYQHDLALLR		7	3	0	0	0	0
N/A	Coagulation factor XII-Mie	Q8IZZ5_HUMAN	50Step_Domain_p450.0_to_500.0	450	500	50.0 AA STEP	50	4	3	0	0	0	0	0.04	0.0013	2	0	LHEAFSPVSYQHDLALLR LHEAFSPVSYQHDLALLR		7	3	0	0	0	0
CSPG2	Chondroitin sulfate proteoglycan 2 (Versican); isoform CRA_b	A0A024RAQ9_HUMAN	80Step_Domain_p0_to_80	0	80	80.0 AA STEP	80	0	0	1	0	0	0	0	1	0	0	ETTVLVAQNGNIK		0	0	1	0	0	0
CSPG2	Chondroitin sulfate proteoglycan 2 (Versican); isoform CRA_b	A0A024RAQ9_HUMAN	80Step_Domain_p80.0_to_160.0	80	160	80.0 AA STEP	80	63	46	44	54	59	63	-0.1	0.473	51	59	CDVMYGIEDTQDTVSLTVDGVVFHYR LLASDAGLYR VSVPTHPEAVGDASLTVVK AATSRYTLNFEAAQK CDVMYGIEDTQDTVSLTVDGVVFHYR LLASDAGLYR VSVPTHPEAVGDASLTVVK CDVMYGIEDTQDTVSLTVDGVVFHYR ETTVLVAQNGNIK LLASDAGLYR VSVPTHPEAVGDASLTVVK	LLASDAGLYR VSVPTHPEAVGDASLTVVK AATSRYTLNFEAAQK CDVMYGIEDTQDTVSLTVDGVVFHYR LLASDAGLYR VSVPTHPEAVGDASLTVVK CDVMYGIEDTQDTVSLTVDGVVFHYR LLASDAGLYR VSVPTHPEAVGDASLTVVK	21	21	51	83	98	88
CSPG2	Chondroitin sulfate proteoglycan 2 (Versican); isoform CRA_b	A0A024RAQ9_HUMAN	80Step_Domain_p160.0_to_240.0	160	240	80.0 AA STEP	80	24	24	19	16	21	18	0.05	1	22	18	SPQETYDVYCYVDHLDGDVFHLTVPSK YTLNFEAAQK AATSRYTLNFEAAQK YTLNFEAAQK SPQETYDVYCYVDHLDGDVFHLTVPSK YTLNFEAAQK	YTLNFEAAQK AATSRYTLNFEAAQK SPQETYDVYCYVDHLDGDVFHLTVPSK YTLNFEAAQK YTLNFEAAQK	8	11	22	25	35	25
CSPG2	Chondroitin sulfate proteoglycan 2 (Versican); isoform CRA_b	A0A024RAQ9_HUMAN	80Step_Domain_p240.0_to_320.0	240	320	80.0 AA STEP	80	78	51	73	50	53	36	0.2625	0	67	46	FTFEEAAK LATVGELQAAWR NGFDQCDYGWLSDASVR SPQETYDVYCYVDHLDGDVFHLTVPSK FTFEEAAK LATVGELQAAWR NGFDQCDYGWLSDASVR AQCGGGLLGVR FTFEEAAK FTFEEAAKECENQDAR LATVGELQAAWR NGFDQCDYGWLSDASVR SPQETYDVYCYVDHLDGDVFHLTVPSK	AQCGGGLLGVR FTFEEAAK FTFEEAAKECENQDAR LATVGELQAAWR NGFDQCDYGWLSDASVR AQCGGGLLGVR FTFEEAAK FTFEEAAKECENQDAR LATVGELQAAWR NGFDQCDYGWLSDASVR SPQETYDVYCYVDHLDGDVFHLTVPSK FTFEEAAK FTFEEAAKECENQDAR LATVGELQAAWR NGFDQCDYGWLSDASVR	26	23	85	78	89	50
CSPG2	Chondroitin sulfate proteoglycan 2 (Versican); isoform CRA_b	A0A024RAQ9_HUMAN	80Step_Domain_p320.0_to_400.0	320	400	80.0 AA STEP	80	0	0	2	1	1	1	0	1	1	1	AQCGGGLLGVR	AQCGGGLLGVR AQCGGGLLGVR FENQTGFPPPDSR	0	0	2	1	2	1
CSPG2	Chondroitin sulfate proteoglycan 2 (Versican); isoform CRA_b	A0A024RAQ9_HUMAN	80Step_Domain_p400.0_to_480.0	400	480	80.0 AA STEP	80	0	0	0	0	0	0	0	1	0	0			0	0	0	0	0	0
CSPG2	Chondroitin sulfate proteoglycan 2 (Versican); isoform CRA_b	A0A024RAQ9_HUMAN	80Step_Domain_p480.0_to_560.0	480	560	80.0 AA STEP	80	0	0	0	0	0	0	0	1	0	0			0	0	0	0	0	0
CSPG2	Chondroitin sulfate proteoglycan 2 (Versican); isoform CRA_b	A0A024RAQ9_HUMAN	80Step_Domain_p560.0_to_640.0	560	640	80.0 AA STEP	80	0	4	3	5	3	3	-0.025	1	2	4	ITEEFLGK ITEEFLGK	ITEEFLGK ITEEFLGK ITEEFLGK	0	2	3	7	5	4
CSPG2	Chondroitin sulfate proteoglycan 2 (Versican); isoform CRA_b	A0A024RAQ9_HUMAN	80Step_Domain_p640.0_to_720.0	640	720	80.0 AA STEP	80	0	2	1	3	2	2	-0.0125	1	1	2	TEEEVFSGMK TEEEVFSGMK	TEEEVFSGMK TEEEVFSGMK TEEEVFSGMK	0	1	1	4	4	3
CSPG2	Chondroitin sulfate proteoglycan 2 (Versican); isoform CRA_b	A0A024RAQ9_HUMAN	80Step_Domain_p720.0_to_800.0	720	800	80.0 AA STEP	80	0	2	1	3	2	2	-0.0125	1	1	2	TEEEVFSGMK TEEEVFSGMK	TEEEVFSGMK TEEEVFSGMK TEEEVFSGMK	0	1	1	4	4	3
CSPG2	Chondroitin sulfate proteoglycan 2 (Versican); isoform CRA_b	A0A024RAQ9_HUMAN	80Step_Domain_p800.0_to_880.0	800	880	80.0 AA STEP	80	0	0	0	1	1	1	-0.0125	1	0	1		QLEEVTDEDIAAHGK QLEEVTDEDIAAHGK QLEEVTDEDIAAHGK	0	0	0	1	2	2
CSPG2	Chondroitin sulfate proteoglycan 2 (Versican); isoform CRA_b	A0A024RAQ9_HUMAN	80Step_Domain_p880.0_to_960.0	880	960	80.0 AA STEP	80	0	0	0	0	0	0	0	1	0	0			0	0	0	0	0	0
CSPG2	Chondroitin sulfate proteoglycan 2 (Versican); isoform CRA_b	A0A024RAQ9_HUMAN	80Step_Domain_p960.0_to_1040.0	960	1040	80.0 AA STEP	80	0	0	0	0	0	0	0	1	0	0			0	0	0	0	0	0
CSPG2	Chondroitin sulfate proteoglycan 2 (Versican); isoform CRA_b	A0A024RAQ9_HUMAN	80Step_Domain_p1040.0_to_1120.0	1040	1120	80.0 AA STEP	80	0	0	0	0	0	0	0	1	0	0			0	0	0	0	0	0
CSPG2	Chondroitin sulfate proteoglycan 2 (Versican); isoform CRA_b	A0A024RAQ9_HUMAN	80Step_Domain_p1120.0_to_1200.0	1120	1200	80.0 AA STEP	80	0	0	0	0	0	0	0	1	0	0			0	0	0	0	0	0
CSPG2	Chondroitin sulfate proteoglycan 2 (Versican); isoform CRA_b	A0A024RAQ9_HUMAN	80Step_Domain_p1200.0_to_1280.0	1200	1280	80.0 AA STEP	80	0	0	0	0	0	0	0	1	0	0			0	0	0	0	0	0
CSPG2	Chondroitin sulfate proteoglycan 2 (Versican); isoform CRA_b	A0A024RAQ9_HUMAN	80Step_Domain_p1280.0_to_1360.0	1280	1360	80.0 AA STEP	80	15	13	26	31	30	43	-0.2125	0	18	35	MSDLSVIGHPIDSESK FHPDINVYIIEVR MSDLSVIGHPIDSESK FHPDINVYIIEVR MSDLSVIGHPIDSESK	MSDLSVIGHPIDSESK MSDLSVIGHPIDSESK MSDLSVIGHPIDSESK	5	6	30	48	50	59
CSPG2	Chondroitin sulfate proteoglycan 2 (Versican); isoform CRA_b	A0A024RAQ9_HUMAN	80Step_Domain_p1360.0_to_1440.0	1360	1440	80.0 AA STEP	80	0	0	0	0	0	0	0	1	0	0			0	0	0	0	0	0
CSPG2	Chondroitin sulfate proteoglycan 2 (Versican); isoform CRA_b	A0A024RAQ9_HUMAN	80Step_Domain_p1440.0_to_1520.0	1440	1520	80.0 AA STEP	80	0	0	0	0	0	0	0	1	0	0			0	0	0	0	0	0
CSPG2	Chondroitin sulfate proteoglycan 2 (Versican); isoform CRA_b	A0A024RAQ9_HUMAN	80Step_Domain_p1520.0_to_1600.0	1520	1600	80.0 AA STEP	80	0	0	0	0	1	1	-0.0125	1	0	1		ATEVTFGEEVEK ATEVTFGEEVEK	0	0	0	0	1	1
CSPG2	Chondroitin sulfate proteoglycan 2 (Versican); isoform CRA_b	A0A024RAQ9_HUMAN	80Step_Domain_p1600.0_to_1680.0	1600	1680	80.0 AA STEP	80	0	0	0	0	0	0	0	1	0	0			0	0	0	0	0	0
CSPG2	Chondroitin sulfate proteoglycan 2 (Versican); isoform CRA_b	A0A024RAQ9_HUMAN	80Step_Domain_p1680.0_to_1760.0	1680	1760	80.0 AA STEP	80	0	0	0	0	0	0	0	1	0	0			0	0	0	0	0	0
CSPG2	Chondroitin sulfate proteoglycan 2 (Versican); isoform CRA_b	A0A024RAQ9_HUMAN	80Step_Domain_p1760.0_to_1840.0	1760	1840	80.0 AA STEP	80	0	0	0	0	0	0	0	1	0	0			0	0	0	0	0	0
CSPG2	Chondroitin sulfate proteoglycan 2 (Versican); isoform CRA_b	A0A024RAQ9_HUMAN	80Step_Domain_p1840.0_to_1920.0	1840	1920	80.0 AA STEP	80	3	4	3	4	3	4	-0.0125	1	3	4	LGEPNYGAEIR LGEPNYGAEIR LGEPNYGAEIR	LGEPNYGAEIR LGEPNYGAEIR LGEPNYGAEIR	1	2	3	6	5	5
CSPG2	Chondroitin sulfate proteoglycan 2 (Versican); isoform CRA_b	A0A024RAQ9_HUMAN	80Step_Domain_p1920.0_to_2000.0	1920	2000	80.0 AA STEP	80	3	4	3	4	3	4	-0.0125	1	3	4	LGEPNYGAEIR LGEPNYGAEIR LGEPNYGAEIR	LGEPNYGAEIR LGEPNYGAEIR LGEPNYGAEIR	1	2	3	6	5	5
CSPG2	Chondroitin sulfate proteoglycan 2 (Versican); isoform CRA_b	A0A024RAQ9_HUMAN	80Step_Domain_p2000.0_to_2080.0	2000	2080	80.0 AA STEP	80	0	0	0	0	0	0	0	1	0	0			0	0	0	0	0	0
CSPG2	Chondroitin sulfate proteoglycan 2 (Versican); isoform CRA_b	A0A024RAQ9_HUMAN	80Step_Domain_p2080.0_to_2160.0	2080	2160	80.0 AA STEP	80	9	9	7	19	19	15	-0.125	0.0903	8	18	QEIESETTSEEQIQEEK QEIESETTSEEQIQEEK QEVNPVRQEIESETTSEEQIQEEK QEIESETTSEEQIQEEK	QEIESETTSEEQIQEEK QEVNPVRQEIESETTSEEQIQEEK QEIESETTSEEQIQEEK QEVNPVRQEIESETTSEEQIQEEK QEIESETTSEEQIQEEK QEVNPVRQEIESETTSEEQIQEEK	3	4	8	30	31	21
CSPG2	Chondroitin sulfate proteoglycan 2 (Versican); isoform CRA_b	A0A024RAQ9_HUMAN	80Step_Domain_p2160.0_to_2240.0	2160	2240	80.0 AA STEP	80	0	0	0	0	0	0	0	1	0	0			0	0	0	0	0	0
CSPG2	Chondroitin sulfate proteoglycan 2 (Versican); isoform CRA_b	A0A024RAQ9_HUMAN	80Step_Domain_p2240.0_to_2320.0	2240	2320	80.0 AA STEP	80	0	0	0	0	0	0	0	1	0	0			0	0	0	0	0	0
CSPG2	Chondroitin sulfate proteoglycan 2 (Versican); isoform CRA_b	A0A024RAQ9_HUMAN	80Step_Domain_p2320.0_to_2400.0	2320	2400	80.0 AA STEP	80	0	0	0	0	0	0	0	1	0	0			0	0	0	0	0	0
CSPG2	Chondroitin sulfate proteoglycan 2 (Versican); isoform CRA_b	A0A024RAQ9_HUMAN	80Step_Domain_p2400.0_to_2480.0	2400	2480	80.0 AA STEP	80	0	0	0	0	0	0	0	1	0	0			0	0	0	0	0	0
CSPG2	Chondroitin sulfate proteoglycan 2 (Versican); isoform CRA_b	A0A024RAQ9_HUMAN	80Step_Domain_p2480.0_to_2560.0	2480	2560	80.0 AA STEP	80	0	0	0	0	0	0	0	1	0	0			0	0	0	0	0	0
CSPG2	Chondroitin sulfate proteoglycan 2 (Versican); isoform CRA_b	A0A024RAQ9_HUMAN	80Step_Domain_p2560.0_to_2640.0	2560	2640	80.0 AA STEP	80	0	0	0	0	0	0	0	1	0	0			0	0	0	0	0	0
CSPG2	Chondroitin sulfate proteoglycan 2 (Versican); isoform CRA_b	A0A024RAQ9_HUMAN	80Step_Domain_p2640.0_to_2720.0	2640	2720	80.0 AA STEP	80	0	0	0	0	0	0	0	1	0	0			0	0	0	0	0	0
CSPG2	Chondroitin sulfate proteoglycan 2 (Versican); isoform CRA_b	A0A024RAQ9_HUMAN	80Step_Domain_p2720.0_to_2800.0	2720	2800	80.0 AA STEP	80	0	0	0	0	0	0	0	1	0	0			0	0	0	0	0	0
CSPG2	Chondroitin sulfate proteoglycan 2 (Versican); isoform CRA_b	A0A024RAQ9_HUMAN	80Step_Domain_p2800.0_to_2880.0	2800	2880	80.0 AA STEP	80	0	0	0	0	0	0	0	1	0	0			0	0	0	0	0	0
CSPG2	Chondroitin sulfate proteoglycan 2 (Versican); isoform CRA_b	A0A024RAQ9_HUMAN	80Step_Domain_p2880.0_to_2960.0	2880	2960	80.0 AA STEP	80	0	0	0	0	0	0	0	1	0	0			0	0	0	0	0	0
CSPG2	Chondroitin sulfate proteoglycan 2 (Versican); isoform CRA_b	A0A024RAQ9_HUMAN	80Step_Domain_p2960.0_to_3040.0	2960	3040	80.0 AA STEP	80	0	0	1	1	1	0	-0.0125	1	0	1	GQDSTIAASEQQVAAR	GQDSTIAASEQQVAAR GQDSTIAASEQQVAAR	0	0	1	1	1	0
CSPG2	Chondroitin sulfate proteoglycan 2 (Versican); isoform CRA_b	A0A024RAQ9_HUMAN	80Step_Domain_p3040.0_to_3120.0	3040	3120	80.0 AA STEP	80	0	0	0	0	0	0	0	1	0	0			0	0	0	0	0	0
CSPG2	Chondroitin sulfate proteoglycan 2 (Versican); isoform CRA_b	A0A024RAQ9_HUMAN	80Step_Domain_p3120.0_to_3200.0	3120	3200	80.0 AA STEP	80	0	33	17	1	3	1	0.1875	0	17	2	LQGAHLTSILSHEEQMFVNR LQGAHLTSILSHEEQMFVNR NGATCVDGFNTFR	NGATCVDGFNTFR LQGAHLTSILSHEEQMFVNR NGATCVDGFNTFR NGATCVDGFNTFR	0	15	20	2	5	1
CSPG2	Chondroitin sulfate proteoglycan 2 (Versican); isoform CRA_b	A0A024RAQ9_HUMAN	80Step_Domain_p3200.0_to_3280.0	3200	3280	80.0 AA STEP	80	3	38	19	8	2	6	0.1875	0	20	5	VGHDYQWIGLNDK LQGAHLTSILSHEEQMFVNR VGHDYQWIGLNDK LQGAHLTSILSHEEQMFVNR VGHDYQWIGLNDK	VGHDYQWIGLNDK LQGAHLTSILSHEEQMFVNR VGHDYQWIGLNDK VGHDYQWIGLNDK	1	17	22	13	3	8
CSPG2	Chondroitin sulfate proteoglycan 2 (Versican); isoform CRA_b	A0A024RAQ9_HUMAN	80Step_Domain_p3280.0_to_3360.0	3280	3360	80.0 AA STEP	80	3	7	3	2	1	1	0.0375	1	4	1	YEINSLIR YEINSLIR YEINSLIR	YEINSLIR YEINSLIR YEINSLIR	1	3	3	3	2	2
CSPG2	Chondroitin sulfate proteoglycan 2 (Versican); isoform CRA_b	A0A024RAQ9_HUMAN	80Step_Domain_p3360.0_to_3396.0	3360	3396	80.0 AA STEP	36	0	0	0	0	0	0	0	1	0	0			0	0	0	0	0	0
CSPG2	Chondroitin sulfate proteoglycan 2 (Versican); isoform CRA_b	A0A024RAQ9_HUMAN	100Step_Domain_p0_to_100	0	100	100.0 AA STEP	100	0	0	1	0	0	0	0	1	0	0	ETTVLVAQNGNIK		0	0	1	0	0	0
CSPG2	Chondroitin sulfate proteoglycan 2 (Versican); isoform CRA_b	A0A024RAQ9_HUMAN	100Step_Domain_p100.0_to_200.0	100	200	100.0 AA STEP	100	84	66	57	70	77	81	-0.07	1	69	76	CDVMYGIEDTQDTVSLTVDGVVFHYR LLASDAGLYR VSVPTHPEAVGDASLTVVK YTLNFEAAQK AATSRYTLNFEAAQK CDVMYGIEDTQDTVSLTVDGVVFHYR LLASDAGLYR VSVPTHPEAVGDASLTVVK YTLNFEAAQK CDVMYGIEDTQDTVSLTVDGVVFHYR LLASDAGLYR VSVPTHPEAVGDASLTVVK YTLNFEAAQK	LLASDAGLYR VSVPTHPEAVGDASLTVVK YTLNFEAAQK AATSRYTLNFEAAQK CDVMYGIEDTQDTVSLTVDGVVFHYR LLASDAGLYR VSVPTHPEAVGDASLTVVK YTLNFEAAQK CDVMYGIEDTQDTVSLTVDGVVFHYR LLASDAGLYR VSVPTHPEAVGDASLTVVK YTLNFEAAQK	28	30	66	108	128	113
CSPG2	Chondroitin sulfate proteoglycan 2 (Versican); isoform CRA_b	A0A024RAQ9_HUMAN	100Step_Domain_p200.0_to_300.0	200	300	100.0 AA STEP	100	78	51	72	50	52	36	0.21	0	67	46	FTFEEAAK LATVGELQAAWR NGFDQCDYGWLSDASVR SPQETYDVYCYVDHLDGDVFHLTVPSK FTFEEAAK LATVGELQAAWR NGFDQCDYGWLSDASVR FTFEEAAK FTFEEAAKECENQDAR LATVGELQAAWR NGFDQCDYGWLSDASVR SPQETYDVYCYVDHLDGDVFHLTVPSK	FTFEEAAK FTFEEAAKECENQDAR LATVGELQAAWR NGFDQCDYGWLSDASVR FTFEEAAK FTFEEAAKECENQDAR LATVGELQAAWR NGFDQCDYGWLSDASVR SPQETYDVYCYVDHLDGDVFHLTVPSK FTFEEAAK FTFEEAAKECENQDAR LATVGELQAAWR NGFDQCDYGWLSDASVR	26	23	83	77	87	50
CSPG2	Chondroitin sulfate proteoglycan 2 (Versican); isoform CRA_b	A0A024RAQ9_HUMAN	100Step_Domain_p300.0_to_400.0	300	400	100.0 AA STEP	100	36	29	35	16	14	17	0.17	0	33	16	NGFDQCDYGWLSDASVR NGFDQCDYGWLSDASVR AQCGGGLLGVR NGFDQCDYGWLSDASVR	AQCGGGLLGVR NGFDQCDYGWLSDASVR AQCGGGLLGVR NGFDQCDYGWLSDASVR FENQTGFPPPDSR NGFDQCDYGWLSDASVR	12	13	40	25	23	23
CSPG2	Chondroitin sulfate proteoglycan 2 (Versican); isoform CRA_b	A0A024RAQ9_HUMAN	100Step_Domain_p400.0_to_500.0	400	500	100.0 AA STEP	100	0	0	0	0	0	0	0	1	0	0			0	0	0	0	0	0
CSPG2	Chondroitin sulfate proteoglycan 2 (Versican); isoform CRA_b	A0A024RAQ9_HUMAN	100Step_Domain_p500.0_to_600.0	500	600	100.0 AA STEP	100	0	0	0	0	0	0	0	1	0	0			0	0	0	0	0	0
CSPG2	Chondroitin sulfate proteoglycan 2 (Versican); isoform CRA_b	A0A024RAQ9_HUMAN	100Step_Domain_p600.0_to_700.0	600	700	100.0 AA STEP	100	0	4	3	5	3	3	-0.02	1	2	4	ITEEFLGK ITEEFLGK	ITEEFLGK ITEEFLGK ITEEFLGK	0	2	3	7	5	4
CSPG2	Chondroitin sulfate proteoglycan 2 (Versican); isoform CRA_b	A0A024RAQ9_HUMAN	100Step_Domain_p700.0_to_800.0	700	800	100.0 AA STEP	100	0	2	1	3	2	2	-0.01	1	1	2	TEEEVFSGMK TEEEVFSGMK	TEEEVFSGMK TEEEVFSGMK TEEEVFSGMK	0	1	1	4	4	3
CSPG2	Chondroitin sulfate proteoglycan 2 (Versican); isoform CRA_b	A0A024RAQ9_HUMAN	100Step_Domain_p800.0_to_900.0	800	900	100.0 AA STEP	100	0	0	0	1	1	1	-0.01	1	0	1		QLEEVTDEDIAAHGK QLEEVTDEDIAAHGK QLEEVTDEDIAAHGK	0	0	0	1	2	2
CSPG2	Chondroitin sulfate proteoglycan 2 (Versican); isoform CRA_b	A0A024RAQ9_HUMAN	100Step_Domain_p900.0_to_1000.0	900	1000	100.0 AA STEP	100	0	0	0	0	0	0	0	1	0	0			0	0	0	0	0	0
CSPG2	Chondroitin sulfate proteoglycan 2 (Versican); isoform CRA_b	A0A024RAQ9_HUMAN	100Step_Domain_p1000.0_to_1100.0	1000	1100	100.0 AA STEP	100	0	0	0	0	0	0	0	1	0	0			0	0	0	0	0	0
CSPG2	Chondroitin sulfate proteoglycan 2 (Versican); isoform CRA_b	A0A024RAQ9_HUMAN	100Step_Domain_p1100.0_to_1200.0	1100	1200	100.0 AA STEP	100	0	0	0	0	0	0	0	1	0	0			0	0	0	0	0	0
CSPG2	Chondroitin sulfate proteoglycan 2 (Versican); isoform CRA_b	A0A024RAQ9_HUMAN	100Step_Domain_p1200.0_to_1300.0	1200	1300	100.0 AA STEP	100	0	0	0	0	0	0	0	1	0	0			0	0	0	0	0	0
CSPG2	Chondroitin sulfate proteoglycan 2 (Versican); isoform CRA_b	A0A024RAQ9_HUMAN	100Step_Domain_p1300.0_to_1400.0	1300	1400	100.0 AA STEP	100	15	13	26	31	30	43	-0.17	0	18	35	MSDLSVIGHPIDSESK FHPDINVYIIEVR MSDLSVIGHPIDSESK FHPDINVYIIEVR MSDLSVIGHPIDSESK	MSDLSVIGHPIDSESK MSDLSVIGHPIDSESK MSDLSVIGHPIDSESK	5	6	30	48	50	59
CSPG2	Chondroitin sulfate proteoglycan 2 (Versican); isoform CRA_b	A0A024RAQ9_HUMAN	100Step_Domain_p1400.0_to_1500.0	1400	1500	100.0 AA STEP	100	0	0	0	0	0	0	0	1	0	0			0	0	0	0	0	0
CSPG2	Chondroitin sulfate proteoglycan 2 (Versican); isoform CRA_b	A0A024RAQ9_HUMAN	100Step_Domain_p1500.0_to_1600.0	1500	1600	100.0 AA STEP	100	0	0	0	0	1	1	-0.01	1	0	1		ATEVTFGEEVEK ATEVTFGEEVEK	0	0	0	0	1	1
CSPG2	Chondroitin sulfate proteoglycan 2 (Versican); isoform CRA_b	A0A024RAQ9_HUMAN	100Step_Domain_p1600.0_to_1700.0	1600	1700	100.0 AA STEP	100	0	0	0	0	0	0	0	1	0	0			0	0	0	0	0	0
CSPG2	Chondroitin sulfate proteoglycan 2 (Versican); isoform CRA_b	A0A024RAQ9_HUMAN	100Step_Domain_p1700.0_to_1800.0	1700	1800	100.0 AA STEP	100	0	0	0	0	0	0	0	1	0	0			0	0	0	0	0	0
CSPG2	Chondroitin sulfate proteoglycan 2 (Versican); isoform CRA_b	A0A024RAQ9_HUMAN	100Step_Domain_p1800.0_to_1900.0	1800	1900	100.0 AA STEP	100	0	0	0	0	0	0	0	1	0	0			0	0	0	0	0	0
CSPG2	Chondroitin sulfate proteoglycan 2 (Versican); isoform CRA_b	A0A024RAQ9_HUMAN	100Step_Domain_p1900.0_to_2000.0	1900	2000	100.0 AA STEP	100	3	4	3	4	3	4	-0.01	1	3	4	LGEPNYGAEIR LGEPNYGAEIR LGEPNYGAEIR	LGEPNYGAEIR LGEPNYGAEIR LGEPNYGAEIR	1	2	3	6	5	5
CSPG2	Chondroitin sulfate proteoglycan 2 (Versican); isoform CRA_b	A0A024RAQ9_HUMAN	100Step_Domain_p2000.0_to_2100.0	2000	2100	100.0 AA STEP	100	0	0	0	0	0	0	0	1	0	0			0	0	0	0	0	0
CSPG2	Chondroitin sulfate proteoglycan 2 (Versican); isoform CRA_b	A0A024RAQ9_HUMAN	100Step_Domain_p2100.0_to_2200.0	2100	2200	100.0 AA STEP	100	9	9	7	19	19	15	-0.1	0.272	8	18	QEIESETTSEEQIQEEK QEIESETTSEEQIQEEK QEVNPVRQEIESETTSEEQIQEEK QEIESETTSEEQIQEEK	QEIESETTSEEQIQEEK QEVNPVRQEIESETTSEEQIQEEK QEIESETTSEEQIQEEK QEVNPVRQEIESETTSEEQIQEEK QEIESETTSEEQIQEEK QEVNPVRQEIESETTSEEQIQEEK	3	4	8	30	31	21
CSPG2	Chondroitin sulfate proteoglycan 2 (Versican); isoform CRA_b	A0A024RAQ9_HUMAN	100Step_Domain_p2200.0_to_2300.0	2200	2300	100.0 AA STEP	100	0	0	0	0	0	0	0	1	0	0			0	0	0	0	0	0
CSPG2	Chondroitin sulfate proteoglycan 2 (Versican); isoform CRA_b	A0A024RAQ9_HUMAN	100Step_Domain_p2300.0_to_2400.0	2300	2400	100.0 AA STEP	100	0	0	0	0	0	0	0	1	0	0			0	0	0	0	0	0
CSPG2	Chondroitin sulfate proteoglycan 2 (Versican); isoform CRA_b	A0A024RAQ9_HUMAN	100Step_Domain_p2400.0_to_2500.0	2400	2500	100.0 AA STEP	100	0	0	0	0	0	0	0	1	0	0			0	0	0	0	0	0
CSPG2	Chondroitin sulfate proteoglycan 2 (Versican); isoform CRA_b	A0A024RAQ9_HUMAN	100Step_Domain_p2500.0_to_2600.0	2500	2600	100.0 AA STEP	100	0	0	0	0	0	0	0	1	0	0			0	0	0	0	0	0
CSPG2	Chondroitin sulfate proteoglycan 2 (Versican); isoform CRA_b	A0A024RAQ9_HUMAN	100Step_Domain_p2600.0_to_2700.0	2600	2700	100.0 AA STEP	100	0	0	0	0	0	0	0	1	0	0			0	0	0	0	0	0
CSPG2	Chondroitin sulfate proteoglycan 2 (Versican); isoform CRA_b	A0A024RAQ9_HUMAN	100Step_Domain_p2700.0_to_2800.0	2700	2800	100.0 AA STEP	100	0	0	0	0	0	0	0	1	0	0			0	0	0	0	0	0
CSPG2	Chondroitin sulfate proteoglycan 2 (Versican); isoform CRA_b	A0A024RAQ9_HUMAN	100Step_Domain_p2800.0_to_2900.0	2800	2900	100.0 AA STEP	100	0	0	0	0	0	0	0	1	0	0			0	0	0	0	0	0
CSPG2	Chondroitin sulfate proteoglycan 2 (Versican); isoform CRA_b	A0A024RAQ9_HUMAN	100Step_Domain_p2900.0_to_3000.0	2900	3000	100.0 AA STEP	100	0	0	0	0	0	0	0	1	0	0			0	0	0	0	0	0
CSPG2	Chondroitin sulfate proteoglycan 2 (Versican); isoform CRA_b	A0A024RAQ9_HUMAN	100Step_Domain_p3000.0_to_3100.0	3000	3100	100.0 AA STEP	100	0	0	1	1	1	0	-0.01	1	0	1	GQDSTIAASEQQVAAR	GQDSTIAASEQQVAAR GQDSTIAASEQQVAAR	0	0	1	1	1	0
CSPG2	Chondroitin sulfate proteoglycan 2 (Versican); isoform CRA_b	A0A024RAQ9_HUMAN	100Step_Domain_p3100.0_to_3200.0	3100	3200	100.0 AA STEP	100	0	33	17	1	3	1	0.15	0	17	2	LQGAHLTSILSHEEQMFVNR LQGAHLTSILSHEEQMFVNR NGATCVDGFNTFR	NGATCVDGFNTFR LQGAHLTSILSHEEQMFVNR NGATCVDGFNTFR NGATCVDGFNTFR	0	15	20	2	5	1
CSPG2	Chondroitin sulfate proteoglycan 2 (Versican); isoform CRA_b	A0A024RAQ9_HUMAN	100Step_Domain_p3200.0_to_3300.0	3200	3300	100.0 AA STEP	100	3	38	19	8	2	6	0.15	0	20	5	VGHDYQWIGLNDK LQGAHLTSILSHEEQMFVNR VGHDYQWIGLNDK LQGAHLTSILSHEEQMFVNR VGHDYQWIGLNDK	VGHDYQWIGLNDK LQGAHLTSILSHEEQMFVNR VGHDYQWIGLNDK VGHDYQWIGLNDK	1	17	22	13	3	8
CSPG2	Chondroitin sulfate proteoglycan 2 (Versican); isoform CRA_b	A0A024RAQ9_HUMAN	100Step_Domain_p3300.0_to_3396.0	3300	3396	100.0 AA STEP	96	3	7	3	2	1	1	0.03125	1	4	1	YEINSLIR YEINSLIR YEINSLIR	YEINSLIR YEINSLIR YEINSLIR	1	3	3	3	2	2
F12	Coagulation factor XII	FA12_HUMAN	Fibronectin type-II	42	90	DOMAINS	48	0	0	0	0	0	0	0	1	0	0			0	0	0	0	0	0
F12	Coagulation factor XII	FA12_HUMAN	EGF-like 1	94	131	DOMAINS	37	0	0	0	0	0	0	0	1	0	0			0	0	0	0	0	0
F12	Coagulation factor XII	FA12_HUMAN	Fibronectin type-I	133	173	DOMAINS	40	0	0	0	0	0	0	0	1	0	0			0	0	0	0	0	0
F12	Coagulation factor XII	FA12_HUMAN	EGF-like 2	174	210	DOMAINS	36	0	0	0	0	0	0	0	1	0	0			0	0	0	0	0	0
F12	Coagulation factor XII	FA12_HUMAN	Kringle	217	295	DOMAINS	78	0	0	0	0	0	0	0	1	0	0			0	0	0	0	0	0
F12	Coagulation factor XII	FA12_HUMAN	Peptidase S1	373	614	DOMAINS	241	6	6	0	0	0	0	0.0165975	0.0006	4	0	LHEAFSPVSYQHDLALLR VVGGLVALR LHEAFSPVSYQHDLALLR VVGGLVALR		11	6	0	0	0	0
N/A	Glucosylceramidase	B7Z6S9_HUMAN	50Step_Domain_p200.0_to_250.0	200	250	50.0 AA STEP	50	1	0	1	0	0	0	0.02	0.0013	1	0	SYFSEEGIGYNIIR SYFSEEGIGYNIIR		1	0	1	0	0	0
N/A	Glucosylceramidase	B7Z6S9_HUMAN	50Step_Domain_p400.0_to_450.0	400	450	50.0 AA STEP	50	1	0	1	0	0	0	0.02	0.0013	1	0	VVLTDPEAAK VVLTDPEAAK		1	0	1	0	0	0
N/A	Nucleolin	B3KTP9_HUMAN	50Step_Domain_p300.0_to_350.0	300	350	50.0 AA STEP	50	0	0	0	1	0	1	-0.02	0.0013	0	1		EVFEDAAEIR EVFEDAAEIR	0	0	0	1	0	1
MAN1A1	Mannosyl-oligosaccharide 1;2-alpha-mannosidase IA	MA1A1_HUMAN	50Step_Domain_p500.0_to_550.0	500	550	50.0 AA STEP	50	2	1	0	0	0	0	0.02	0.0014	1	0	FDGGVEAIATR FDGGVEAIATR		3	1	0	0	0	0
VASN	Vasorin	VASN_HUMAN	50Step_Domain_p150.0_to_200.0	150	200	50.0 AA STEP	50	0	0	0	1	1	1	-0.02	0.0014	0	1		LAGLGLQQLDEGLFSR LAGLGLQQLDEGLFSR LAGLGLQQLDEGLFSR	0	0	0	1	1	1
ANXA1	Annexin A1	ANXA1_HUMAN	50Step_Domain_p150.0_to_200.0	150	200	50.0 AA STEP	50	9	5	7	13	15	11	-0.12	0.0014	7	13	DITSDTSGDFR NALLSLAK SEDFGVNEDLADSDAR DITSDTSGDFR NALLSLAK SEDFGVNEDLADSDAR GDRSEDFGVNEDLADSDAR NALLSLAK SEDFGVNEDLADSDAR	DITSDTSGDFR NALLSLAK SEDFGVNEDLADSDAR DITSDTSGDFR GDRSEDFGVNEDLADSDAR NALLSLAK SEDFGVNEDLADSDAR DITSDTSGDFR GDRSEDFGVNEDLADSDAR NALLSLAK SEDFGVNEDLADSDAR	3	3	7	12	19	19
SAA2-SAA4	SAA2-SAA4 readthrough	A0A096LPE2_HUMAN	50Step_Domain_p100.0_to_150.0	100	150	50.0 AA STEP	50	9	9	0	0	0	0	0.12	0.0015	6	0	AYWDIMISNHQNSNR EALQGVGDMGR GPGGVWAAK AYWDIMISNHQNSNR EALQGVGDMGR		17	2	0	0	0	0
H4C1	Histone H4	H4_HUMAN	50Step_Domain_p50.0_to_100.0	50	100	50.0 AA STEP	50	4	12	42	54	65	57	-0.8	0.0015	19	59	ISGLIYEETR TVTAMDVVYALK VFLENVIR ISGLIYEETR TVTAMDVVYALK VFLENVIR ISGLIYEETR TVTAMDVVYALK VFLENVIR	DAVTYTEHAK ISGLIYEETR TVTAMDVVYALK VFLENVIR DAVTYTEHAK ISGLIYEETR TVTAMDVVYALK VFLENVIR DAVTYTEHAK ISGLIYEETR TVTAMDVVYALK VFLENVIR	7	13	15	14	16	22
COMP	Cartilage oligomeric matrix protein	COMP_HUMAN	50Step_Domain_p700.0_to_750.0	700	750	50.0 AA STEP	50	177	195	180	176	151	149	0.5	0.0016	184	159	CNDTIPEDYETHQLR FYEGPELVADSNVVLDTTMR LGVFCFSQENIIWANLR YRCNDTIPEDYETHQLR CNDTIPEDYETHQLR FYEGPELVADSNVVLDTTMR YRCNDTIPEDYETHQLR CNDTIPEDYETHQLR FYEGPELVADSNVVLDTTMR LGVFCFSQENIIWANLR YRCNDTIPEDYETHQLR	CNDTIPEDYETHQLR FYEGPELVADSNVVLDTTMR YRCNDTIPEDYETHQLR CNDTIPEDYETHQLR FYEGPELVADSNVVLDTTMR YRCNDTIPEDYETHQLR CNDTIPEDYETHQLR FYEGPELVADSNVVLDTTMR	138	146	226	139	121	127
C7	Complement component C7	CO7_HUMAN	50Step_Domain_p300.0_to_350.0	300	350	50.0 AA STEP	50	6	4	0	0	0	0	0.06	0.0017	3	0	LIDQYGTHYLQSGSLGGEYR SSGWHFVVK VLFYVDSEK LIDQYGTHYLQSGSLGGEYR VLFYVDSEK		11	8	0	0	0	0
SERPINA1	Alpha-1-antitrypsin	A1AT_HUMAN	50Step_Domain_p150.0_to_200.0	150	200	50.0 AA STEP	50	74	117	49	33	27	55	0.84	0.0018	80	38	KQINDYVEK LYHSEAFTVNFGDTEEAK LYHSEAFTVNFGDTEEAKK QINDYVEK ELDRDTVFALVNYIFFK LVDKFLEDVKK LYHSEAFTVNFGDTEEAK LYHSEAFTVNFGDTEEAKK QINDYVEK LYHSEAFTVNFGDTEEAK LYHSEAFTVNFGDTEEAKK QINDYVEK	LYHSEAFTVNFGDTEEAK QINDYVEK KQINDYVEK LYHSEAFTVNFGDTEEAK QINDYVEK KQINDYVEK LYHSEAFTVNFGDTEEAK LYHSEAFTVNFGDTEEAKK QINDYVEK	106	191	21	12	11	25
CPB2	Carboxypeptidase B2	CBPB2_HUMAN	50Step_Domain_p350.0_to_400.0	350	400	50.0 AA STEP	50	2	4	0	0	0	0	0.04	0.0018	2	0	DTGTYGFLLPER YSFTIELR DTGTYGFLLPER YSFTIELR YTHGHGSETLYLAPGGGDDWIYDLGIK		3	5	0	0	0	0
N/A	cDNA FLJ53075; highly similar to Kininogen-1	B4DPP8_HUMAN	50Step_Domain_p150.0_to_200.0	150	200	50.0 AA STEP	50	2	2	11	0	0	0	0.1	0.0018	5	0	ITYSIVQTNCSK QVVAGLNFR QVVAGLNFR QVVAGLNFR		4	3	2	0	0	0
F12	Coagulation factor XII	FA12_HUMAN	80Step_Domain_p0_to_80	0	80	80.0 AA STEP	80	0	0	0	0	0	0	0	1	0	0			0	0	0	0	0	0
F12	Coagulation factor XII	FA12_HUMAN	80Step_Domain_p80.0_to_160.0	80	160	80.0 AA STEP	80	0	0	0	0	0	0	0	1	0	0			0	0	0	0	0	0
F12	Coagulation factor XII	FA12_HUMAN	80Step_Domain_p160.0_to_240.0	160	240	80.0 AA STEP	80	0	0	0	0	0	0	0	1	0	0			0	0	0	0	0	0
F12	Coagulation factor XII	FA12_HUMAN	80Step_Domain_p240.0_to_320.0	240	320	80.0 AA STEP	80	0	0	0	0	0	0	0	1	0	0			0	0	0	0	0	0
F12	Coagulation factor XII	FA12_HUMAN	80Step_Domain_p320.0_to_400.0	320	400	80.0 AA STEP	80	2	3	0	0	0	0	0.025	0.0272	2	0	VVGGLVALR VVGGLVALR		4	3	0	0	0	0
F12	Coagulation factor XII	FA12_HUMAN	80Step_Domain_p400.0_to_480.0	400	480	80.0 AA STEP	80	4	3	0	0	0	0	0.025	0.0008	2	0	LHEAFSPVSYQHDLALLR LHEAFSPVSYQHDLALLR		7	3	0	0	0	0
F12	Coagulation factor XII	FA12_HUMAN	80Step_Domain_p480.0_to_560.0	480	560	80.0 AA STEP	80	0	0	0	0	0	0	0	1	0	0			0	0	0	0	0	0
F12	Coagulation factor XII	FA12_HUMAN	80Step_Domain_p560.0_to_615.0	560	615	80.0 AA STEP	55	0	0	0	0	0	0	0	1	0	0			0	0	0	0	0	0
F12	Coagulation factor XII	FA12_HUMAN	100Step_Domain_p0_to_100	0	100	100.0 AA STEP	100	0	0	0	0	0	0	0	1	0	0			0	0	0	0	0	0
F12	Coagulation factor XII	FA12_HUMAN	100Step_Domain_p100.0_to_200.0	100	200	100.0 AA STEP	100	0	0	0	0	0	0	0	1	0	0			0	0	0	0	0	0
F12	Coagulation factor XII	FA12_HUMAN	100Step_Domain_p200.0_to_300.0	200	300	100.0 AA STEP	100	0	0	0	0	0	0	0	1	0	0			0	0	0	0	0	0
F12	Coagulation factor XII	FA12_HUMAN	100Step_Domain_p300.0_to_400.0	300	400	100.0 AA STEP	100	2	3	0	0	0	0	0.02	0.0434	2	0	VVGGLVALR VVGGLVALR		4	3	0	0	0	0
F12	Coagulation factor XII	FA12_HUMAN	100Step_Domain_p400.0_to_500.0	400	500	100.0 AA STEP	100	4	3	0	0	0	0	0.02	0.0021	2	0	LHEAFSPVSYQHDLALLR LHEAFSPVSYQHDLALLR		7	3	0	0	0	0
F12	Coagulation factor XII	FA12_HUMAN	100Step_Domain_p500.0_to_600.0	500	600	100.0 AA STEP	100	0	0	0	0	0	0	0	1	0	0			0	0	0	0	0	0
F12	Coagulation factor XII	FA12_HUMAN	100Step_Domain_p600.0_to_615.0	600	615	100.0 AA STEP	15	0	0	0	0	0	0	0	1	0	0			0	0	0	0	0	0
N/A	Coagulation factor XII-Mie	Q8IZZ5_HUMAN	Fibronectin type-II	42	90	DOMAINS	48	0	0	0	0	0	0	0	1	0	0			0	0	0	0	0	0
N/A	Coagulation factor XII-Mie	Q8IZZ5_HUMAN	EGF-like	94	131	DOMAINS	37	0	0	0	0	0	0	0	1	0	0			0	0	0	0	0	0
N/A	Coagulation factor XII-Mie	Q8IZZ5_HUMAN	Fibronectin type-I	133	173	DOMAINS	40	0	0	0	0	0	0	0	1	0	0			0	0	0	0	0	0
N/A	Coagulation factor XII-Mie	Q8IZZ5_HUMAN	EGF-like_174_210	174	210	DOMAINS	36	0	0	0	0	0	0	0	1	0	0			0	0	0	0	0	0
N/A	Coagulation factor XII-Mie	Q8IZZ5_HUMAN	Kringle	216	295	DOMAINS	79	0	0	0	0	0	0	0	1	0	0			0	0	0	0	0	0
N/A	Coagulation factor XII-Mie	Q8IZZ5_HUMAN	Peptidase S1	373	614	DOMAINS	241	6	6	0	0	0	0	0.0165975	0.0006	4	0	LHEAFSPVSYQHDLALLR VVGGLVALR LHEAFSPVSYQHDLALLR VVGGLVALR		11	6	0	0	0	0
N/A	cDNA FLJ53075; highly similar to Kininogen-1	B4DPP8_HUMAN	50Step_Domain_p200.0_to_250.0	200	250	50.0 AA STEP	50	4	6	5	0	0	0	0.1	0.0018	5	0	DFVQPPTK IASFSQNCDIYPGK IASFSQNCDIYPGKDFVQPPTK SLWNGDTGECTDNAYIDIQLR DFVQPPTK IASFSQNCDIYPGK SLWNGDTGECTDNAYIDIQLR SLWNGDTGECTDNAYIDIQLR		8	10	1	0	0	0
N/A	cDNA FLJ53075; highly similar to Kininogen-1	B4DPP8_HUMAN	50Step_Domain_p250.0_to_300.0	250	300	50.0 AA STEP	50	6	4	5	0	0	0	0.1	0.0018	5	0	DIPTNSPELEETLTHTITK DIPTNSPELEETLTHTITK DIPTNSPELEETLTHTITK		11	6	1	0	0	0
N/A	Alpha-2-HS-glycoprotein	B7Z8Q2_HUMAN	50Step_Domain_p350.0_to_400.0	350	400	50.0 AA STEP	50	11	11	0	0	0	0	0.14	0.0018	7	0	HTFMGVVSLGSPSGEVSHPR HTFMGVVSLGSPSGEVSHPR		22	17	0	0	0	0
N/A	Alpha-2-HS-glycoprotein	B7Z8Q2_HUMAN	50Step_Domain_p400.0_to_433.0	400	433	50.0 AA STEP	33	11	11	0	0	0	0	0.212121	0.0018	7	0	HTFMGVVSLGSPSGEVSHPR HTFMGVVSLGSPSGEVSHPR		22	17	0	0	0	0
N/A	cDNA; FLJ94361; highly similar to Homo sapiens serine (or cysteine) proteinase inhibitor; clade A(alpha-1 antiproteinase; antitrypsin); member 6 (SERPINA6); mRNA	B2R9F2_HUMAN	50Step_Domain_p250.0_to_300.0	250	300	50.0 AA STEP	50	3	2	5	0	0	0	0.06	0.0018	3	0	WSAGLTSSQVDLYIPK MNTVIAALSR WSAGLTSSQVDLYIPK WSAGLTSSQVDLYIPK		3	4	3	0	0	0
N/A	cDNA; FLJ94361; highly similar to Homo sapiens serine (or cysteine) proteinase inhibitor; clade A(alpha-1 antiproteinase; antitrypsin); member 6 (SERPINA6); mRNA	B2R9F2_HUMAN	50Step_Domain_p300.0_to_350.0	300	350	50.0 AA STEP	50	3	2	5	0	0	0	0.06	0.0018	3	0	WSAGLTSSQVDLYIPK WSAGLTSSQVDLYIPK WSAGLTSSQVDLYIPK		3	3	3	0	0	0
SERPINA6	Corticosteroid-binding globulin	CBG_HUMAN	50Step_Domain_p250.0_to_300.0	250	300	50.0 AA STEP	50	3	2	5	0	0	0	0.06	0.0018	3	0	WSAGLTSSQVDLYIPK MNTVIAALSR WSAGLTSSQVDLYIPK WSAGLTSSQVDLYIPK		3	4	3	0	0	0
SERPINA6	Corticosteroid-binding globulin	CBG_HUMAN	50Step_Domain_p300.0_to_350.0	300	350	50.0 AA STEP	50	3	2	5	0	0	0	0.06	0.0018	3	0	WSAGLTSSQVDLYIPK WSAGLTSSQVDLYIPK WSAGLTSSQVDLYIPK		3	3	3	0	0	0
SPP1	Secreted phosphoprotein 1 (Osteopontin; bone sialoprotein I; early T-lymphocyte activation 1); isoform CRA_c	A0A024RDE6_HUMAN	50Step_Domain_p150.0_to_200.0	150	200	50.0 AA STEP	50	0	0	1	3	2	2	-0.04	0.0018	0	2	AIPVAQDLNAPSDWDSR	AIPVAQDLNAPSDWDSR AIPVAQDLNAPSDWDSR GDSVVYGLR AIPVAQDLNAPSDWDSR GDSVVYGLR	0	0	1	5	4	4
ITIH1	Inter-alpha-trypsin inhibitor heavy chain H1	ITIH1_HUMAN	50Step_Domain_p150.0_to_200.0	150	200	50.0 AA STEP	50	9	15	0	0	0	0	0.16	0.0019	8	0	NHMQYEIVIK TMEQFTIHLTVNPQSK VTFQLTYEEVLK NHMQYEIVIK QLVHHFEIDVDIFEPQGISK TMEQFTIHLTVNPQSK VTFQLTYEEVLK VTFQLTYEEVLKR		17	16	0	0	0	0
ANGPTL2	Angiopoietin-related protein 2	ANGL2_HUMAN	50Step_Domain_p100.0_to_150.0	100	150	50.0 AA STEP	50	5	11	9	2	2	5	0.1	0.002	8	3	DNALELSQLENR QIETLQQLVEVDGGIVSEVK RDNALELSQLENR DNALELSQLENR QIETLQQLVEVDGGIVSEVK RDNALELSQLENR RQIETLQQLVEVDGGIVSEVK VTQLYMQLLHEIIR DNALELSQLENR QIETLQQLVEVDGGIVSEVK RDNALELSQLENR RQIETLQQLVEVDGGIVSEVK	DNALELSQLENR DNALELSQLENR DNALELSQLENR QIETLQQLVEVDGGIVSEVK	5	15	13	1	1	3
CHRD	Chordin	E7ESX1_HUMAN	50Step_Domain_p300.0_to_350.0	300	350	50.0 AA STEP	50	2	3	1	1	0	0	0.04	0.002	2	0	LQILHQGQLLR LQILHQGQLLR LQILHQGQLLR SGGLTQVPLR	SGGLTQVPLR	1	2	2	1	0	0
CHRD	Chordin	CHRD_HUMAN	50Step_Domain_p300.0_to_350.0	300	350	50.0 AA STEP	50	2	3	1	1	0	0	0.04	0.002	2	0	LQILHQGQLLR LQILHQGQLLR LQILHQGQLLR SGGLTQVPLR	SGGLTQVPLR	1	2	2	1	0	0
N/A	Coagulation factor XII-Mie	Q8IZZ5_HUMAN	80Step_Domain_p0_to_80	0	80	80.0 AA STEP	80	0	0	0	0	0	0	0	1	0	0			0	0	0	0	0	0
N/A	Coagulation factor XII-Mie	Q8IZZ5_HUMAN	80Step_Domain_p80.0_to_160.0	80	160	80.0 AA STEP	80	0	0	0	0	0	0	0	1	0	0			0	0	0	0	0	0
N/A	Coagulation factor XII-Mie	Q8IZZ5_HUMAN	80Step_Domain_p160.0_to_240.0	160	240	80.0 AA STEP	80	0	0	0	0	0	0	0	1	0	0			0	0	0	0	0	0
N/A	Coagulation factor XII-Mie	Q8IZZ5_HUMAN	80Step_Domain_p240.0_to_320.0	240	320	80.0 AA STEP	80	0	0	0	0	0	0	0	1	0	0			0	0	0	0	0	0
N/A	Coagulation factor XII-Mie	Q8IZZ5_HUMAN	80Step_Domain_p320.0_to_400.0	320	400	80.0 AA STEP	80	2	3	0	0	0	0	0.025	0.0272	2	0	VVGGLVALR VVGGLVALR		4	3	0	0	0	0
N/A	Coagulation factor XII-Mie	Q8IZZ5_HUMAN	80Step_Domain_p400.0_to_480.0	400	480	80.0 AA STEP	80	4	3	0	0	0	0	0.025	0.0008	2	0	LHEAFSPVSYQHDLALLR LHEAFSPVSYQHDLALLR		7	3	0	0	0	0
N/A	Coagulation factor XII-Mie	Q8IZZ5_HUMAN	80Step_Domain_p480.0_to_560.0	480	560	80.0 AA STEP	80	0	0	0	0	0	0	0	1	0	0			0	0	0	0	0	0
N/A	Coagulation factor XII-Mie	Q8IZZ5_HUMAN	80Step_Domain_p560.0_to_615.0	560	615	80.0 AA STEP	55	0	0	0	0	0	0	0	1	0	0			0	0	0	0	0	0
N/A	Coagulation factor XII-Mie	Q8IZZ5_HUMAN	100Step_Domain_p0_to_100	0	100	100.0 AA STEP	100	0	0	0	0	0	0	0	1	0	0			0	0	0	0	0	0
N/A	Coagulation factor XII-Mie	Q8IZZ5_HUMAN	100Step_Domain_p100.0_to_200.0	100	200	100.0 AA STEP	100	0	0	0	0	0	0	0	1	0	0			0	0	0	0	0	0
N/A	Coagulation factor XII-Mie	Q8IZZ5_HUMAN	100Step_Domain_p200.0_to_300.0	200	300	100.0 AA STEP	100	0	0	0	0	0	0	0	1	0	0			0	0	0	0	0	0
N/A	Coagulation factor XII-Mie	Q8IZZ5_HUMAN	100Step_Domain_p300.0_to_400.0	300	400	100.0 AA STEP	100	2	3	0	0	0	0	0.02	0.0434	2	0	VVGGLVALR VVGGLVALR		4	3	0	0	0	0
N/A	Coagulation factor XII-Mie	Q8IZZ5_HUMAN	100Step_Domain_p400.0_to_500.0	400	500	100.0 AA STEP	100	4	3	0	0	0	0	0.02	0.0021	2	0	LHEAFSPVSYQHDLALLR LHEAFSPVSYQHDLALLR		7	3	0	0	0	0
N/A	Coagulation factor XII-Mie	Q8IZZ5_HUMAN	100Step_Domain_p500.0_to_600.0	500	600	100.0 AA STEP	100	0	0	0	0	0	0	0	1	0	0			0	0	0	0	0	0
N/A	Coagulation factor XII-Mie	Q8IZZ5_HUMAN	100Step_Domain_p600.0_to_615.0	600	615	100.0 AA STEP	15	0	0	0	0	0	0	0	1	0	0			0	0	0	0	0	0
N/A	Chondroitin sulfate proteoglycan 2 (Versican) variant	Q59FG9_HUMAN	Disordered	434	453	REGIONS	19	0	0	0	0	0	0	0	1	0	0			0	0	0	0	0	0
N/A	Chondroitin sulfate proteoglycan 2 (Versican) variant	Q59FG9_HUMAN	Disordered_617_636	617	636	REGIONS	19	0	0	0	0	0	0	0	1	0	0			0	0	0	0	0	0
N/A	Chondroitin sulfate proteoglycan 2 (Versican) variant	Q59FG9_HUMAN	Disordered_821_843	821	843	REGIONS	22	0	0	0	0	0	0	0	1	0	0			0	0	0	0	0	0
N/A	Chondroitin sulfate proteoglycan 2 (Versican) variant	Q59FG9_HUMAN	Disordered_1140_1168	1140	1168	REGIONS	28	0	0	0	0	0	0	0	1	0	0			0	0	0	0	0	0
N/A	Chondroitin sulfate proteoglycan 2 (Versican) variant	Q59FG9_HUMAN	Disordered_1291_1330	1291	1330	REGIONS	39	0	0	0	0	0	0	0	1	0	0			0	0	0	0	0	0
N/A	Chondroitin sulfate proteoglycan 2 (Versican) variant	Q59FG9_HUMAN	Disordered_1434_1511	1434	1511	REGIONS	77	0	0	0	0	0	0	0	1	0	0			0	0	0	0	0	0
N/A	Chondroitin sulfate proteoglycan 2 (Versican) variant	Q59FG9_HUMAN	Disordered_1524_1553	1524	1553	REGIONS	29	0	0	0	0	0	0	0	1	0	0			0	0	0	0	0	0
N/A	Chondroitin sulfate proteoglycan 2 (Versican) variant	Q59FG9_HUMAN	Disordered_1730_1752	1730	1752	REGIONS	22	0	0	0	0	0	0	0	1	0	0			0	0	0	0	0	0
N/A	Chondroitin sulfate proteoglycan 2 (Versican) variant	Q59FG9_HUMAN	Disordered_1773_1803	1773	1803	REGIONS	30	0	0	0	0	0	0	0	1	0	0			0	0	0	0	0	0
N/A	Chondroitin sulfate proteoglycan 2 (Versican) variant	Q59FG9_HUMAN	Disordered_1976_2008	1976	2008	REGIONS	32	0	0	0	0	0	0	0	1	0	0			0	0	0	0	0	0
N/A	Chondroitin sulfate proteoglycan 2 (Versican) variant	Q59FG9_HUMAN	Disordered_2123_2148	2123	2148	REGIONS	25	9	9	7	19	19	15	-0.4	0	8	18	QEIESETTSEEQIQEEK QEIESETTSEEQIQEEK QEVNPVRQEIESETTSEEQIQEEK QEIESETTSEEQIQEEK	QEIESETTSEEQIQEEK QEVNPVRQEIESETTSEEQIQEEK QEIESETTSEEQIQEEK QEVNPVRQEIESETTSEEQIQEEK QEIESETTSEEQIQEEK QEVNPVRQEIESETTSEEQIQEEK	3	4	8	30	31	21
N/A	Chondroitin sulfate proteoglycan 2 (Versican) variant	Q59FG9_HUMAN	Disordered_2182_2202	2182	2202	REGIONS	20	0	0	0	0	0	0	0	1	0	0			0	0	0	0	0	0
N/A	Chondroitin sulfate proteoglycan 2 (Versican) variant	Q59FG9_HUMAN	Disordered_2385_2410	2385	2410	REGIONS	25	0	0	0	0	0	0	0	1	0	0			0	0	0	0	0	0
N/A	Chondroitin sulfate proteoglycan 2 (Versican) variant	Q59FG9_HUMAN	Disordered_2459_2481	2459	2481	REGIONS	22	0	0	0	0	0	0	0	1	0	0			0	0	0	0	0	0
N/A	Chondroitin sulfate proteoglycan 2 (Versican) variant	Q59FG9_HUMAN	Disordered_2507_2532	2507	2532	REGIONS	25	0	0	0	0	0	0	0	1	0	0			0	0	0	0	0	0
N/A	Chondroitin sulfate proteoglycan 2 (Versican) variant	Q59FG9_HUMAN	Disordered_2612_2631	2612	2631	REGIONS	19	0	0	0	0	0	0	0	1	0	0			0	0	0	0	0	0
N/A	Chondroitin sulfate proteoglycan 2 (Versican) variant	Q59FG9_HUMAN	Disordered_2848_2870	2848	2870	REGIONS	22	0	0	0	0	0	0	0	1	0	0			0	0	0	0	0	0
N/A	Chondroitin sulfate proteoglycan 2 (Versican) variant	Q59FG9_HUMAN	Disordered_2895_2919	2895	2919	REGIONS	24	0	0	0	0	0	0	0	1	0	0			0	0	0	0	0	0
N/A	Chondroitin sulfate proteoglycan 2 (Versican) variant	Q59FG9_HUMAN	Disordered_3385_3410	3385	3410	REGIONS	25	0	0	0	0	0	0	0	1	0	0			0	0	0	0	0	0
N/A	Chondroitin sulfate proteoglycan 2 (Versican) variant	Q59FG9_HUMAN	Ig-like	48	160	DOMAINS	112	63	42	44	54	56	63	-0.0714286	1	50	58	CDVMYGIEDTQDTVSLTVDGVVFHYR LLASDAGLYR VSVPTHPEAVGDASLTVVK CDVMYGIEDTQDTVSLTVDGVVFHYR LLASDAGLYR VSVPTHPEAVGDASLTVVK CDVMYGIEDTQDTVSLTVDGVVFHYR ETTVLVAQNGNIK LLASDAGLYR VSVPTHPEAVGDASLTVVK	LLASDAGLYR VSVPTHPEAVGDASLTVVK CDVMYGIEDTQDTVSLTVDGVVFHYR LLASDAGLYR VSVPTHPEAVGDASLTVVK CDVMYGIEDTQDTVSLTVDGVVFHYR LLASDAGLYR VSVPTHPEAVGDASLTVVK	21	19	51	83	94	88
N/A	Chondroitin sulfate proteoglycan 2 (Versican) variant	Q59FG9_HUMAN	Link	164	259	DOMAINS	95	30	31	29	16	22	19	0.115789	0.5586	30	19	CDVMYGIEDTQDTVSLTVDGVVFHYR SPQETYDVYCYVDHLDGDVFHLTVPSK YTLNFEAAQK AATSRYTLNFEAAQK CDVMYGIEDTQDTVSLTVDGVVFHYR YTLNFEAAQK CDVMYGIEDTQDTVSLTVDGVVFHYR SPQETYDVYCYVDHLDGDVFHLTVPSK YTLNFEAAQK	YTLNFEAAQK AATSRYTLNFEAAQK CDVMYGIEDTQDTVSLTVDGVVFHYR SPQETYDVYCYVDHLDGDVFHLTVPSK YTLNFEAAQK CDVMYGIEDTQDTVSLTVDGVVFHYR YTLNFEAAQK	10	14	33	25	37	26
N/A	Chondroitin sulfate proteoglycan 2 (Versican) variant	Q59FG9_HUMAN	Link_265_361	265	361	DOMAINS	96	78	51	73	50	53	37	0.208333	0.014	67	47	FTFEEAAK LATVGELQAAWR NGFDQCDYGWLSDASVR SPQETYDVYCYVDHLDGDVFHLTVPSK FTFEEAAK LATVGELQAAWR NGFDQCDYGWLSDASVR AQCGGGLLGVR FTFEEAAK FTFEEAAKECENQDAR LATVGELQAAWR NGFDQCDYGWLSDASVR SPQETYDVYCYVDHLDGDVFHLTVPSK	AQCGGGLLGVR FTFEEAAK FTFEEAAKECENQDAR LATVGELQAAWR NGFDQCDYGWLSDASVR AQCGGGLLGVR FTFEEAAK FTFEEAAKECENQDAR LATVGELQAAWR NGFDQCDYGWLSDASVR SPQETYDVYCYVDHLDGDVFHLTVPSK FENQTGFPPPDSR FTFEEAAK FTFEEAAKECENQDAR LATVGELQAAWR NGFDQCDYGWLSDASVR	26	23	85	78	89	51
N/A	Chondroitin sulfate proteoglycan 2 (Versican) variant	Q59FG9_HUMAN	EGF-like	3103	3139	DOMAINS	36	0	0	0	0	0	0	0	1	0	0			0	0	0	0	0	0
N/A	Chondroitin sulfate proteoglycan 2 (Versican) variant	Q59FG9_HUMAN	EGF-like_3141_3177	3141	3177	DOMAINS	36	0	0	2	1	2	1	0	1	1	1	NGATCVDGFNTFR	NGATCVDGFNTFR NGATCVDGFNTFR NGATCVDGFNTFR	0	0	2	2	3	1
N/A	Chondroitin sulfate proteoglycan 2 (Versican) variant	Q59FG9_HUMAN	C-type lectin	3190	3304	DOMAINS	114	3	38	19	8	2	6	0.131579	0.1547	20	5	VGHDYQWIGLNDK LQGAHLTSILSHEEQMFVNR VGHDYQWIGLNDK LQGAHLTSILSHEEQMFVNR VGHDYQWIGLNDK	VGHDYQWIGLNDK LQGAHLTSILSHEEQMFVNR VGHDYQWIGLNDK VGHDYQWIGLNDK	1	17	22	13	3	8
N/A	Chondroitin sulfate proteoglycan 2 (Versican) variant	Q59FG9_HUMAN	Sushi	3308	3368	DOMAINS	60	3	7	3	2	1	1	0.05	1	4	1	YEINSLIR YEINSLIR YEINSLIR	YEINSLIR YEINSLIR YEINSLIR	1	3	3	3	2	2
N/A	Testis tissue sperm-binding protein Li 94mP	A0A140VKH7_HUMAN	50Step_Domain_p750.0_to_800.0	750	800	50.0 AA STEP	50	12	6	7	6	4	5	0.06	0.002	8	5	AAIVFTDGR AIEEELQEIASEPTNK AQDDVSEWASK AAIVFTDGR AIEEELQEIASEPTNK AQDDVSEWASK AAIVFTDGR AIEEELQEIASEPTNK AQDDVSEWASK	AAIVFTDGR AIEEELQEIASEPTNK AQDDVSEWASK AAIVFTDGR AIEEELQEIASEPTNK AQDDVSEWASK AAIVFTDGR AIEEELQEIASEPTNK AQDDVSEWASK	4	3	7	9	6	9
MATN2	Matrilin-2	MATN2_HUMAN	50Step_Domain_p750.0_to_800.0	750	800	50.0 AA STEP	50	12	6	7	6	4	5	0.06	0.002	8	5	AAIVFTDGR AIEEELQEIASEPTNK AQDDVSEWASK AAIVFTDGR AIEEELQEIASEPTNK AQDDVSEWASK AAIVFTDGR AIEEELQEIASEPTNK AQDDVSEWASK	AAIVFTDGR AIEEELQEIASEPTNK AQDDVSEWASK AAIVFTDGR AIEEELQEIASEPTNK AQDDVSEWASK AAIVFTDGR AIEEELQEIASEPTNK AQDDVSEWASK	4	3	7	9	6	9
FGB	Fibrinogen beta chain	FIBB_HUMAN	50Step_Domain_p400.0_to_450.0	400	450	50.0 AA STEP	50	34	25	57	0	0	0	0.78	0.002	39	0	DNDGWLTSDPR EDGGGWWYNR TMTIHNGMFFSTYDR YYWGGQYTWDMAK DNDGWLTSDPR EDGGGWWYNR YYWGGQYTWDMAK DNDGWLTSDPR EDGGGWWYNR YYWGGQYTWDMAK		68	16	3	0	0	0
HEL-S-78p	Fibrinogen beta chain	V9HVY1_HUMAN	50Step_Domain_p400.0_to_450.0	400	450	50.0 AA STEP	50	34	25	57	0	0	0	0.78	0.002	39	0	DNDGWLTSDPR EDGGGWWYNR TMTIHNGMFFSTYDR YYWGGQYTWDMAK DNDGWLTSDPR EDGGGWWYNR YYWGGQYTWDMAK DNDGWLTSDPR EDGGGWWYNR YYWGGQYTWDMAK		68	16	3	0	0	0
TUBA1B	Tubulin alpha-1B chain	TBA1B_HUMAN	50Step_Domain_p100.0_to_150.0	100	150	50.0 AA STEP	50	3	3	1	1	0	1	0.02	0.002	2	1	EIIDLVLDR EIIDLVLDR EIIDLVLDR	EIIDLVLDR EIIDLVLDR	1	4	2	1	0	1
TUBA1A	Tubulin alpha-1A chain	TBA1A_HUMAN	50Step_Domain_p100.0_to_150.0	100	150	50.0 AA STEP	50	3	3	1	1	0	1	0.02	0.002	2	1	EIIDLVLDR EIIDLVLDR EIIDLVLDR	EIIDLVLDR EIIDLVLDR	1	4	2	1	0	1
CLSTN2	Calsyntenin-2	CSTN2_HUMAN	50Step_Domain_p150.0_to_200.0	150	200	50.0 AA STEP	50	0	0	0	1	1	0	-0.02	0.002	0	1		DVNEFAPTFK DVNEFAPTFK	0	0	0	1	1	0
CLSTN2	Calsyntenin-2	CSTN2_HUMAN	50Step_Domain_p550.0_to_600.0	550	600	50.0 AA STEP	50	0	0	0	1	1	0	-0.02	0.002	0	1		EGLDINSLESLGQGIK QFPTAGVR	0	0	0	1	1	0
FSTL1	Follistatin-related protein 1	FSTL1_HUMAN	50Step_Domain_p250.0_to_300.0	250	300	50.0 AA STEP	50	0	0	0	2	1	2	-0.04	0.0021	0	2		GAQTQTEEEMTR GAQTQTEEEMTR GAQTQTEEEMTR	0	0	0	2	1	1
AEBP1	Adipocyte enhancer-binding protein 1	AEBP1_HUMAN	50Step_Domain_p800.0_to_850.0	800	850	50.0 AA STEP	50	21	20	20	15	8	19	0.12	0.0024	20	14	GEDEDEVSEAQETPDHAIFR GEDEDEVSEAQETPDHAIFR TPTQEQLLAAAMAAARGEDEDEVSEAQETPDHAIFR GEDEDEVSEAQETPDHAIFR	GEDEDEVSEAQETPDHAIFR GEDEDEVSEAQETPDHAIFR GEDEDEVSEAQETPDHAIFR	16	19	29	8	5	20
FMOD	Fibromodulin	FMOD_HUMAN	50Step_Domain_p150.0_to_200.0	150	200	50.0 AA STEP	50	26	8	19	45	35	69	-0.64	0.0024	18	50	ELHLDHNQISR LYLDHNNLTR ELHLDHNQISR LYLDHNNLTR ELHLDHNQISR LYLDHNNLTR VPNNALEGLENLTALYLQHNEIQEVGSSMR	ELHLDHNQISR LYLDHNNLTR ELHLDHNQISR LYLDHNNLTR ELHLDHNQISR LYLDHNNLTR	14	7	20	66	46	86
LGALS3BP	Galectin-3-binding protein	LG3BP_HUMAN	50Step_Domain_p300.0_to_350.0	300	350	50.0 AA STEP	50	2	2	0	0	0	0	0.02	0.0024	1	0	ASHEEVEGLVEK AVDTWSWGER AVDTWSWGER SDLAVPSELALLK		3	3	0	0	0	0
N/A	cDNA FLJ77565; highly similar to Homo sapiens interleukin 1 receptor accessory protein (IL1RAP); transcript variant 1; mRNA	A8K6K4_HUMAN	50Step_Domain_p0_to_50	0	50	50.0 AA STEP	50	1	1	0	0	0	0	0.02	0.0024	1	0	QIQVFEDEPAR QIQVFEDEPAR		1	1	0	0	0	0
IL1RAP	Interleukin-1 receptor accessory protein	IL1AP_HUMAN	50Step_Domain_p0_to_50	0	50	50.0 AA STEP	50	1	1	0	0	0	0	0.02	0.0024	1	0	QIQVFEDEPAR QIQVFEDEPAR		1	1	0	0	0	0
AFM	Afamin	AFAM_HUMAN	50Step_Domain_p150.0_to_200.0	150	200	50.0 AA STEP	50	4	3	0	0	0	0	0.04	0.0024	2	0	ESLLNHFLYEVAR ESLLNHFLYEVAR NPFVFAPTLLTVAVHFEEVAK		6	6	0	0	0	0
N/A	cDNA FLJ51535; highly similar to Phosphatidylethanolamine-binding protein 1	B4DRT4_HUMAN	50Step_Domain_p50.0_to_100.0	50	100	50.0 AA STEP	50	0	1	1	3	2	3	-0.04	0.0024	1	3	LYTLVLTDPDAPSR GNDISSGTVLSDYVGSGPPK	GNDISSGTVLSDYVGSGPPK LYTLVLTDPDAPSR GNDISSGTVLSDYVGSGPPK LYTLVLTDPDAPSR GNDISSGTVLSDYVGSGPPK LYTLVLTDPDAPSR	0	1	1	6	3	5
HEL-S-34	Epididymis secretory protein Li 34	D9IAI1_HUMAN	50Step_Domain_p50.0_to_100.0	50	100	50.0 AA STEP	50	0	1	1	3	2	3	-0.04	0.0024	1	3	LYTLVLTDPDAPSR GNDISSGTVLSDYVGSGPPK	GNDISSGTVLSDYVGSGPPK LYTLVLTDPDAPSR GNDISSGTVLSDYVGSGPPK LYTLVLTDPDAPSR GNDISSGTVLSDYVGSGPPK LYTLVLTDPDAPSR	0	1	1	6	3	5
PEBP1	Phosphatidylethanolamine-binding protein 1	PEBP1_HUMAN	50Step_Domain_p50.0_to_100.0	50	100	50.0 AA STEP	50	0	1	1	3	2	3	-0.04	0.0024	1	3	LYTLVLTDPDAPSR GNDISSGTVLSDYVGSGPPK	GNDISSGTVLSDYVGSGPPK LYTLVLTDPDAPSR GNDISSGTVLSDYVGSGPPK LYTLVLTDPDAPSR GNDISSGTVLSDYVGSGPPK LYTLVLTDPDAPSR	0	1	1	6	3	5
N/A	Delta-tubulin	B3KML9_HUMAN	50Step_Domain_p150.0_to_200.0	150	200	50.0 AA STEP	50	0	0	0	2	2	1	-0.04	0.0024	0	2		FPGQLNADLR FPGQLNADLR FPGQLNADLR	0	0	0	3	1	1
N/A	Delta-tubulin	B3KML9_HUMAN	50Step_Domain_p200.0_to_250.0	200	250	50.0 AA STEP	50	0	0	0	2	2	1	-0.04	0.0024	0	2		FPGQLNADLR FPGQLNADLR FPGQLNADLR	0	0	0	3	1	1
N/A	cDNA FLJ75416; highly similar to Homo sapiens complement factor H (CFH); mRNA	A8K5T0_HUMAN	50Step_Domain_p50.0_to_100.0	50	100	50.0 AA STEP	50	10	6	22	10	28	28	-0.18	0.0025	13	22	GEWVALNPLR NTEILTGSWSDQTYPEGTQAIYK RNTEILTGSWSDQTYPEGTQAIYK GEWVALNPLR NTEILTGSWSDQTYPEGTQAIYK GEWVALNPLR NTEILTGSWSDQTYPEGTQAIYK	GEWVALNPLR NTEILTGSWSDQTYPEGTQAIYK GEWVALNPLR NTEILTGSWSDQTYPEGTQAIYK GEWVALNPLR NTEILTGSWSDQTYPEGTQAIYK	19	7	9	2	4	6
CFH	Complement factor H	CFAH_HUMAN	50Step_Domain_p50.0_to_100.0	50	100	50.0 AA STEP	50	10	6	22	10	28	28	-0.18	0.0025	13	22	GEWVALNPLR NTEILTGSWSDQTYPEGTQAIYK RNTEILTGSWSDQTYPEGTQAIYK GEWVALNPLR NTEILTGSWSDQTYPEGTQAIYK GEWVALNPLR NTEILTGSWSDQTYPEGTQAIYK	GEWVALNPLR NTEILTGSWSDQTYPEGTQAIYK GEWVALNPLR NTEILTGSWSDQTYPEGTQAIYK GEWVALNPLR NTEILTGSWSDQTYPEGTQAIYK	19	7	9	2	4	6
N/A	cDNA; FLJ79457; highly similar to Insulin-like growth factor-binding proteincomplex acid labile chain	B0AZL7_HUMAN	50Step_Domain_p450.0_to_500.0	450	500	50.0 AA STEP	50	4	2	0	0	0	0	0.04	0.0026	2	0	AFWLDVSHNR LAELPADALGPLQR LEALPNSLLAPLGR LEYLLLSR LAELPADALGPLQR LEYLLLSR		7	2	0	0	0	0
IGFALS	Insulin-like growth factor-binding protein complex acid labile subunit	ALS_HUMAN	50Step_Domain_p450.0_to_500.0	450	500	50.0 AA STEP	50	4	2	0	0	0	0	0.04	0.0026	2	0	AFWLDVSHNR LAELPADALGPLQR LEALPNSLLAPLGR LEYLLLSR LAELPADALGPLQR LEYLLLSR		7	2	0	0	0	0
ITIH6	Inter-alpha-trypsin inhibitor heavy chain H6	ITIH6_HUMAN	50Step_Domain_p1150.0_to_1200.0	1150	1200	50.0 AA STEP	50	2	0	1	0	0	0	0.02	0.0027	1	0	AYTITISR LSWDQPALLK AYTITISR LSWDQPALLK		2	0	2	0	0	0
ITIH6	Inter-alpha-trypsin inhibitor heavy chain H6	ITIH6_HUMAN	50Step_Domain_p1200.0_to_1250.0	1200	1250	50.0 AA STEP	50	0	2	1	0	0	0	0.02	0.0027	1	0	GLIGQFQHADIR LGPYLEFLVLR GLIGQFQHADIR		0	2	1	0	0	0
COL15A1	Collagen alpha-1(XV) chain	COFA1_HUMAN	50Step_Domain_p100.0_to_150.0	100	150	50.0 AA STEP	50	0	0	0	1	3	3	-0.04	0.0028	0	2		GGVLFAITDAFQK GGVLFAITDAFQK LSGVEDGHQR GGVLFAITDAFQK LSGVEDGHQR	0	0	0	1	3	5
NID2	Nidogen-2	NID2_HUMAN	50Step_Domain_p1200.0_to_1250.0	1200	1250	50.0 AA STEP	50	6	11	6	3	7	5	0.06	0.0028	8	5	GNLYWTDWNR IESALLDGSER VLFYTDLVNPR IESALLDGSER VLFYTDLVNPR IESALLDGSER	IESALLDGSER AIAVDPIR IESALLDGSER VLFYTDLVNPR AIAVDPIR IESALLDGSER TMYWTDSVLDK VLFYTDLVNPR	5	3	2	2	6	8
VIT	Vitrin	VITRN_HUMAN	50Step_Domain_p400.0_to_450.0	400	450	50.0 AA STEP	50	0	0	0	1	1	1	-0.02	0.0028	0	1		QYVVEPNFANK QYVVEPNFANK QYVVEPNFANK	0	0	0	1	1	2
EFEMP1	EGF-containing fibulin-like extracellular matrix protein 1	FBLN3_HUMAN	50Step_Domain_p400.0_to_450.0	400	450	50.0 AA STEP	50	3	1	0	0	0	0	0.02	0.003	1	0	QTSPVSAMLVLVK SGNENGEFYLR SVPSDIFQIQATTIYANTINTFR QTSPVSAMLVLVK SVPSDIFQIQATTIYANTINTFR		5	2	0	0	0	0
N/A	cDNA FLJ77823; highly similar to Homo sapiens EGF-containing fibulin-like extracellular matrix protein 1; transcript variant 3; mRNA	A8KAJ3_HUMAN	50Step_Domain_p400.0_to_450.0	400	450	50.0 AA STEP	50	3	1	0	0	0	0	0.02	0.003	1	0	QTSPVSAMLVLVK SGNENGEFYLR SVPSDIFQIQATTIYANTINTFR QTSPVSAMLVLVK SVPSDIFQIQATTIYANTINTFR		5	2	0	0	0	0
SERPINC1	Antithrombin-III	ANT3_HUMAN	50Step_Domain_p300.0_to_350.0	300	350	50.0 AA STEP	50	5	8	7	0	0	0	0.14	0.003	7	0	GDDITMVLILPKPEK VAEGTQVLELPFK ELTPEVLQEWLDELEEMMLVVHMPR GDDITMVLILPKPEK VAEGTQVLELPFK VAEGTQVLELPFKGDDITMVLILPKPEK VAEGTQVLELPFK		10	15	2	0	0	0
COL5A2	Collagen alpha-2(V) chain	CO5A2_HUMAN	50Step_Domain_p1350.0_to_1400.0	1350	1400	50.0 AA STEP	50	0	6	3	1	0	0	0.06	0.003	3	0	GSQFAYGDHQSPNTAITQMTFLR GSQFAYGDHQSPNTAITQMTFLR	GSQFAYGDHQSPNTAITQMTFLR	0	2	1	2	0	0
COL5A2	Collagen alpha-2(V) chain	CO5A2_HUMAN	50Step_Domain_p1400.0_to_1450.0	1400	1450	50.0 AA STEP	50	3	0	0	5	3	3	-0.06	0.003	1	4	NSVGYMDDQAK	GANDLDIK GANDLDIK GANDLDIK NSVGYMDDQAK	1	0	0	9	2	3
PFKP	ATP-dependent 6-phosphofructokinase; platelet type	PFKAP_HUMAN	50Step_Domain_p250.0_to_300.0	250	300	50.0 AA STEP	50	0	0	0	1	1	1	-0.02	0.0032	0	1		ELVVTQLGYDTR ELVVTQLGYDTR ELVVTQLGYDTR	0	0	0	1	1	1
PFKP	ATP-dependent 6-phosphofructokinase; platelet type	PFKAP_HUMAN	50Step_Domain_p300.0_to_350.0	300	350	50.0 AA STEP	50	0	0	0	1	1	1	-0.02	0.0032	0	1		ELVVTQLGYDTR ELVVTQLGYDTR ELVVTQLGYDTR	0	0	0	1	1	1
N/A	Semaphorin-3C	B4E2I9_HUMAN	50Step_Domain_p450.0_to_500.0	450	500	50.0 AA STEP	50	3	2	3	1	0	0	0.06	0.0032	3	0	YHVLFLGTDR YHVLFLGTDR YHVLFLGTDR	YHVLFLGTDR	2	2	4	1	0	0
N/A	Immunoglobulin delta heavy chain	IGD_HUMAN	50Step_Domain_p300.0_to_350.0	300	350	50.0 AA STEP	50	3	3	0	0	0	0	0.04	0.0033	2	0	DAHLTWEVAGK VPTGGVEEGLLER DAHLTWEVAGK VPTGGVEEGLLER		5	3	0	0	0	0
COL11A2	Collagen alpha-2(XI) chain	A0A140T9I7_HUMAN	50Step_Domain_p1600.0_to_1623.0	1600	1623	50.0 AA STEP	23	0	10	13	10	11	27	-0.347826	0.0033	8	16	TPVLEQLPVLDASFSDLGAPPR TPVLEQLPVLDASFSDLGAPPR	TPVLEQLPVLDASFSDLGAPPR TPVLEQLPVLDASFSDLGAPPR TPVLEQLPVLDASFSDLGAPPRR TPVLEQLPVLDASFSDLGAPPR	0	3	5	14	17	50
N/A	40S ribosomal protein S27a	A0A248RGE3_HUMAN	50Step_Domain_p0_to_50	0	50	50.0 AA STEP	50	0	2	0	3	3	3	-0.04	0.0033	1	3	TITLEVEPSDTIENVK	TITLEVEPSDTIENVK TLSDYNIQK TITLEVEPSDTIENVK TLSDYNIQK TITLEVEPSDTIENVK TLSDYNIQK	0	1	0	3	3	6
POSTN	Periostin	POSTN_HUMAN	50Step_Domain_p250.0_to_300.0	250	300	50.0 AA STEP	50	1	2	2	0	0	0	0.04	0.0034	2	0	AAAITSDILEALGR DGHFTLFAPTNEAFEK AAAITSDILEALGR VLTQIGTSIQDFIEAEDDLSSFR AAAITSDILEALGR		2	4	1	0	0	0
C5	Complement C5	CO5_HUMAN	50Step_Domain_p1550.0_to_1600.0	1550	1600	50.0 AA STEP	50	5	7	0	0	0	0	0.08	0.0034	4	0	ATLLDIYK DSEITFIK TGEAVAEKDSEITFIK ATLLDIYK DSEITFIK VSITSITVENVFVK		10	6	0	0	0	0
C5	Complement C5	CO5_HUMAN	50Step_Domain_p1600.0_to_1650.0	1600	1650	50.0 AA STEP	50	6	6	0	0	0	0	0.08	0.0034	4	0	DSEITFIK TGEAVAEKDSEITFIK YIYPLDSLTWIEYWPR DSEITFIK VTCTNAELVK YIYPLDSLTWIEYWPR		11	5	0	0	0	0
N/A	Alpha-1;4 glucan phosphorylase	B2R825_HUMAN	50Step_Domain_p250.0_to_300.0	250	300	50.0 AA STEP	50	0	0	0	1	2	0	-0.02	0.0034	0	1		APNDFNLR DFNVGDYIQAVLDR	0	0	0	2	2	0
PYGL	Glycogen phosphorylase; liver form	PYGL_HUMAN	50Step_Domain_p250.0_to_300.0	250	300	50.0 AA STEP	50	0	0	0	1	2	0	-0.02	0.0034	0	1		APNDFNLR DFNVGDYIQAVLDR	0	0	0	2	2	0
C4A	C4a anaphylatoxin	A0A0G2JPR0_HUMAN	50Step_Domain_p1000.0_to_1050.0	1000	1050	50.0 AA STEP	50	12	18	19	25	24	34	-0.24	0.0035	16	28	DHAVDLIQK GCGEQTMIYLAPTLAASR TEQWSTLPPETK VTASDPLDTLGSEGALSPGGVASLLR DHAVDLIQK GCGEQTMIYLAPTLAASR TEQWSTLPPETK VTASDPLDTLGSEGALSPGGVASLLR VTASDPLDTLGSEGALSPGGVASLLR	DHAVDLIQK VTASDPLDTLGSEGALSPGGVASLLR VTASDPLDTLGSEGALSPGGVASLLR VTASDPLDTLGSEGALSPGGVASLLR	23	19	2	4	2	5
LRG1	Leucine-rich alpha-2-glycoprotein	A2GL_HUMAN	50Step_Domain_p100.0_to_150.0	100	150	50.0 AA STEP	50	9	6	0	0	0	0	0.1	0.0035	5	0	ENQLEVLEVSWLHGLK NALTGLPPGLFQASATLDTLVLK ENQLEVLEVSWLHGLK NALTGLPPGLFQASATLDTLVLK		17	5	0	0	0	0
LRG1	Leucine-rich alpha-2-glycoprotein	A2GL_HUMAN	50Step_Domain_p200.0_to_250.0	200	250	50.0 AA STEP	50	3	4	8	0	0	0	0.1	0.0035	5	0	DLLLPQPDLR TLDLGENQLETLPPDLLR DLLLPQPDLR TLDLGENQLETLPPDLLR DLLLPQPDLR		5	4	1	0	0	0
ITIH3	Inter-alpha-trypsin inhibitor heavy chain H3	ITIH3_HUMAN	50Step_Domain_p500.0_to_550.0	500	550	50.0 AA STEP	50	6	8	0	0	0	0	0.1	0.0036	5	0	DYIFGNYIER GHGATNDLTFTEEVDMK LVDEDMNSFK LVDEDMNSFK		11	1	0	0	0	0
N/A	Complement component C6	A8K8Z4_HUMAN	50Step_Domain_p200.0_to_250.0	200	250	50.0 AA STEP	50	6	2	0	0	0	0	0.06	0.0038	3	0	VPANLENVGFEVQTAEDDLK VPANLENVGFEVQTAEDDLK		11	3	0	0	0	0
C6	Complement component C6	CO6_HUMAN	50Step_Domain_p200.0_to_250.0	200	250	50.0 AA STEP	50	6	2	0	0	0	0	0.06	0.0038	3	0	VPANLENVGFEVQTAEDDLK VPANLENVGFEVQTAEDDLK		11	3	0	0	0	0
N/A	cDNA FLJ52277; highly similar to Follistatin-related protein 1	B4DTZ8_HUMAN	50Step_Domain_p200.0_to_250.0	200	250	50.0 AA STEP	50	0	0	0	2	1	2	-0.04	0.0042	0	2		GAQTQTEEEMTR GAQTQTEEEMTR GAQTQTEEEMTR	0	0	0	2	1	1
N/A	Glucosylceramidase	B7Z6E6_HUMAN	50Step_Domain_p100.0_to_150.0	100	150	50.0 AA STEP	50	1	0	1	0	0	0	0.02	0.0044	1	0	SYFSEEGIGYNIIR SYFSEEGIGYNIIR		1	0	1	0	0	0
N/A	Glucosylceramidase	B7Z6E6_HUMAN	50Step_Domain_p300.0_to_350.0	300	350	50.0 AA STEP	50	1	0	1	0	0	0	0.02	0.0044	1	0	VVLTDPEAAK VVLTDPEAAK		1	0	1	0	0	0
N/A	Testicular tissue protein Li 61	A0A140VJI7_HUMAN	50Step_Domain_p100.0_to_150.0	100	150	50.0 AA STEP	50	1	1	2	0	0	0	0.02	0.0044	1	0	EVGPPLPQEAVPLQK EVGPPLPQEAVPLQK EVGPPLPQEAVPLQK		2	1	3	0	0	0
N/A	Testicular tissue protein Li 61	A0A140VJI7_HUMAN	50Step_Domain_p300.0_to_350.0	300	350	50.0 AA STEP	50	0	2	2	0	0	0	0.02	0.0044	1	0	ELLALIQLER NLPATDPLQR ELLALIQLER		0	3	3	0	0	0
N/A	Testicular tissue protein Li 61	A0A140VJI7_HUMAN	50Step_Domain_p350.0_to_400.0	350	400	50.0 AA STEP	50	2	1	1	0	0	0	0.02	0.0044	1	0	APYPNYDRDILTIDIGR AWEDTLDK AWEDTLDK AWEDTLDK		3	1	1	0	0	0
ECM1	Extracellular matrix protein 1	ECM1_HUMAN	50Step_Domain_p100.0_to_150.0	100	150	50.0 AA STEP	50	1	1	2	0	0	0	0.02	0.0044	1	0	EVGPPLPQEAVPLQK EVGPPLPQEAVPLQK EVGPPLPQEAVPLQK		2	1	3	0	0	0
ECM1	Extracellular matrix protein 1	ECM1_HUMAN	50Step_Domain_p300.0_to_350.0	300	350	50.0 AA STEP	50	0	2	2	0	0	0	0.02	0.0044	1	0	ELLALIQLER NLPATDPLQR ELLALIQLER		0	3	3	0	0	0
ECM1	Extracellular matrix protein 1	ECM1_HUMAN	50Step_Domain_p350.0_to_400.0	350	400	50.0 AA STEP	50	2	1	1	0	0	0	0.02	0.0044	1	0	APYPNYDRDILTIDIGR AWEDTLDK AWEDTLDK AWEDTLDK		3	1	1	0	0	0
CRLF1	Cytokine receptor-like factor 1	CRLF1_HUMAN	50Step_Domain_p150.0_to_200.0	150	200	50.0 AA STEP	50	0	2	2	0	0	0	0.02	0.0045	1	0	DLALFTPYEIWVEATNR DLALFTPYEIWVEATNR		0	4	2	0	0	0
SERPINA4	Kallistatin	KAIN_HUMAN	50Step_Domain_p150.0_to_200.0	150	200	50.0 AA STEP	50	4	2	6	0	0	0	0.08	0.0045	4	0	IVDLVSELK LFHTNFYDTVGTIQLINDHVK IVDLVSELK IVDLVSELKK IVDLVSELK		7	4	2	0	0	0
N/A	cDNA; FLJ93695; highly similar to Homo sapiens serpin peptidase inhibitor; clade A (alpha-1 antiproteinase; antitrypsin); member 4 (SERPINA4); mRNA	B2R815_HUMAN	50Step_Domain_p150.0_to_200.0	150	200	50.0 AA STEP	50	4	2	6	0	0	0	0.08	0.0045	4	0	IVDLVSELK LFHTNFYDTVGTIQLINDHVK IVDLVSELK IVDLVSELKK IVDLVSELK		7	4	2	0	0	0
NCL	Nucleolin	NUCL_HUMAN	50Step_Domain_p400.0_to_450.0	400	450	50.0 AA STEP	50	0	0	0	1	0	1	-0.02	0.0045	0	1		EVFEDAAEIR EVFEDAAEIR	0	0	0	1	0	1
EL52	Epididymis luminal secretory protein 52	K9JA46_HUMAN	50Step_Domain_p0_to_50	0	50	50.0 AA STEP	50	0	0	0	0	1	1	-0.02	0.0045	0	1		ELISNSSDALDK ELISNSSDALDK	0	0	0	0	2	1
EL52	Epididymis luminal secretory protein 52	K9JA46_HUMAN	50Step_Domain_p50.0_to_100.0	50	100	50.0 AA STEP	50	0	0	0	0	1	1	-0.02	0.0045	0	1		ELISNSSDALDK ELISNSSDALDK	0	0	0	0	2	1
EL52	Epididymis luminal secretory protein 52	K9JA46_HUMAN	50Step_Domain_p250.0_to_300.0	250	300	50.0 AA STEP	50	0	0	0	0	1	1	-0.02	0.0045	0	1		NPDDITNEEYGEFYK NPDDITNEEYGEFYK	0	0	0	0	1	2
EL52	Epididymis luminal secretory protein 52	K9JA46_HUMAN	50Step_Domain_p300.0_to_350.0	300	350	50.0 AA STEP	50	0	0	0	0	1	1	-0.02	0.0045	0	1		NPDDITNEEYGEFYK NPDDITNEEYGEFYK	0	0	0	0	1	2
HSP90AA1	Heat shock protein HSP 90-alpha	HS90A_HUMAN	50Step_Domain_p0_to_50	0	50	50.0 AA STEP	50	0	0	0	0	1	1	-0.02	0.0045	0	1		ELISNSSDALDK ELISNSSDALDK	0	0	0	0	2	1
N/A	Chondroitin sulfate proteoglycan 2 (Versican) variant	Q59FG9_HUMAN	80Step_Domain_p0_to_80	0	80	80.0 AA STEP	80	0	0	0	0	0	0	0	1	0	0			0	0	0	0	0	0
N/A	Chondroitin sulfate proteoglycan 2 (Versican) variant	Q59FG9_HUMAN	80Step_Domain_p80.0_to_160.0	80	160	80.0 AA STEP	80	63	42	44	54	56	63	-0.1	0.215	50	58	CDVMYGIEDTQDTVSLTVDGVVFHYR LLASDAGLYR VSVPTHPEAVGDASLTVVK CDVMYGIEDTQDTVSLTVDGVVFHYR LLASDAGLYR VSVPTHPEAVGDASLTVVK CDVMYGIEDTQDTVSLTVDGVVFHYR ETTVLVAQNGNIK LLASDAGLYR VSVPTHPEAVGDASLTVVK	LLASDAGLYR VSVPTHPEAVGDASLTVVK CDVMYGIEDTQDTVSLTVDGVVFHYR LLASDAGLYR VSVPTHPEAVGDASLTVVK CDVMYGIEDTQDTVSLTVDGVVFHYR LLASDAGLYR VSVPTHPEAVGDASLTVVK	21	19	51	83	94	88
N/A	Chondroitin sulfate proteoglycan 2 (Versican) variant	Q59FG9_HUMAN	80Step_Domain_p160.0_to_240.0	160	240	80.0 AA STEP	80	27	31	23	16	22	19	0.1	0.215	27	19	CDVMYGIEDTQDTVSLTVDGVVFHYR YTLNFEAAQK AATSRYTLNFEAAQK CDVMYGIEDTQDTVSLTVDGVVFHYR YTLNFEAAQK CDVMYGIEDTQDTVSLTVDGVVFHYR YTLNFEAAQK	YTLNFEAAQK AATSRYTLNFEAAQK CDVMYGIEDTQDTVSLTVDGVVFHYR YTLNFEAAQK CDVMYGIEDTQDTVSLTVDGVVFHYR YTLNFEAAQK	9	14	27	25	36	26
N/A	Chondroitin sulfate proteoglycan 2 (Versican) variant	Q59FG9_HUMAN	80Step_Domain_p240.0_to_320.0	240	320	80.0 AA STEP	80	78	51	72	50	52	36	0.2625	0	67	46	FTFEEAAK LATVGELQAAWR NGFDQCDYGWLSDASVR SPQETYDVYCYVDHLDGDVFHLTVPSK FTFEEAAK LATVGELQAAWR NGFDQCDYGWLSDASVR FTFEEAAK FTFEEAAKECENQDAR LATVGELQAAWR NGFDQCDYGWLSDASVR SPQETYDVYCYVDHLDGDVFHLTVPSK	FTFEEAAK FTFEEAAKECENQDAR LATVGELQAAWR NGFDQCDYGWLSDASVR FTFEEAAK FTFEEAAKECENQDAR LATVGELQAAWR NGFDQCDYGWLSDASVR SPQETYDVYCYVDHLDGDVFHLTVPSK FTFEEAAK FTFEEAAKECENQDAR LATVGELQAAWR NGFDQCDYGWLSDASVR	26	23	83	77	87	50
N/A	Chondroitin sulfate proteoglycan 2 (Versican) variant	Q59FG9_HUMAN	80Step_Domain_p320.0_to_400.0	320	400	80.0 AA STEP	80	0	0	2	1	1	1	0	1	1	1	AQCGGGLLGVR	AQCGGGLLGVR AQCGGGLLGVR FENQTGFPPPDSR	0	0	2	1	2	1
N/A	Chondroitin sulfate proteoglycan 2 (Versican) variant	Q59FG9_HUMAN	80Step_Domain_p400.0_to_480.0	400	480	80.0 AA STEP	80	0	0	0	0	0	0	0	1	0	0			0	0	0	0	0	0
N/A	Chondroitin sulfate proteoglycan 2 (Versican) variant	Q59FG9_HUMAN	80Step_Domain_p480.0_to_560.0	480	560	80.0 AA STEP	80	0	0	0	0	0	0	0	1	0	0			0	0	0	0	0	0
N/A	Chondroitin sulfate proteoglycan 2 (Versican) variant	Q59FG9_HUMAN	80Step_Domain_p560.0_to_640.0	560	640	80.0 AA STEP	80	0	0	0	0	0	0	0	1	0	0			0	0	0	0	0	0
N/A	Chondroitin sulfate proteoglycan 2 (Versican) variant	Q59FG9_HUMAN	80Step_Domain_p640.0_to_720.0	640	720	80.0 AA STEP	80	0	4	3	5	3	3	-0.025	1	2	4	ITEEFLGK ITEEFLGK	ITEEFLGK ITEEFLGK ITEEFLGK	0	2	3	7	5	4
N/A	Chondroitin sulfate proteoglycan 2 (Versican) variant	Q59FG9_HUMAN	80Step_Domain_p720.0_to_800.0	720	800	80.0 AA STEP	80	0	2	1	3	2	2	-0.0125	1	1	2	TEEEVFSGMK TEEEVFSGMK	TEEEVFSGMK TEEEVFSGMK TEEEVFSGMK	0	1	1	4	4	3
N/A	Chondroitin sulfate proteoglycan 2 (Versican) variant	Q59FG9_HUMAN	80Step_Domain_p800.0_to_880.0	800	880	80.0 AA STEP	80	0	0	0	1	1	1	-0.0125	1	0	1		QLEEVTDEDIAAHGK QLEEVTDEDIAAHGK QLEEVTDEDIAAHGK	0	0	0	1	2	2
N/A	Chondroitin sulfate proteoglycan 2 (Versican) variant	Q59FG9_HUMAN	80Step_Domain_p880.0_to_960.0	880	960	80.0 AA STEP	80	0	0	0	1	1	1	-0.0125	1	0	1		QLEEVTDEDIAAHGK QLEEVTDEDIAAHGK QLEEVTDEDIAAHGK	0	0	0	1	2	2
N/A	Chondroitin sulfate proteoglycan 2 (Versican) variant	Q59FG9_HUMAN	80Step_Domain_p960.0_to_1040.0	960	1040	80.0 AA STEP	80	0	0	0	0	0	0	0	1	0	0			0	0	0	0	0	0
N/A	Chondroitin sulfate proteoglycan 2 (Versican) variant	Q59FG9_HUMAN	80Step_Domain_p1040.0_to_1120.0	1040	1120	80.0 AA STEP	80	0	0	0	0	0	0	0	1	0	0			0	0	0	0	0	0
N/A	Chondroitin sulfate proteoglycan 2 (Versican) variant	Q59FG9_HUMAN	80Step_Domain_p1120.0_to_1200.0	1120	1200	80.0 AA STEP	80	0	0	0	0	0	0	0	1	0	0			0	0	0	0	0	0
N/A	Chondroitin sulfate proteoglycan 2 (Versican) variant	Q59FG9_HUMAN	80Step_Domain_p1200.0_to_1280.0	1200	1280	80.0 AA STEP	80	0	0	0	0	0	0	0	1	0	0			0	0	0	0	0	0
N/A	Chondroitin sulfate proteoglycan 2 (Versican) variant	Q59FG9_HUMAN	80Step_Domain_p1280.0_to_1360.0	1280	1360	80.0 AA STEP	80	15	13	26	31	30	43	-0.2125	0	18	35	MSDLSVIGHPIDSESK FHPDINVYIIEVR MSDLSVIGHPIDSESK FHPDINVYIIEVR MSDLSVIGHPIDSESK	MSDLSVIGHPIDSESK MSDLSVIGHPIDSESK MSDLSVIGHPIDSESK	5	6	30	48	50	59
N/A	Chondroitin sulfate proteoglycan 2 (Versican) variant	Q59FG9_HUMAN	80Step_Domain_p1360.0_to_1440.0	1360	1440	80.0 AA STEP	80	15	9	25	31	30	43	-0.2375	0	16	35	MSDLSVIGHPIDSESK MSDLSVIGHPIDSESK MSDLSVIGHPIDSESK	MSDLSVIGHPIDSESK MSDLSVIGHPIDSESK MSDLSVIGHPIDSESK	5	4	29	48	50	59
N/A	Chondroitin sulfate proteoglycan 2 (Versican) variant	Q59FG9_HUMAN	80Step_Domain_p1440.0_to_1520.0	1440	1520	80.0 AA STEP	80	0	0	0	0	0	0	0	1	0	0			0	0	0	0	0	0
N/A	Chondroitin sulfate proteoglycan 2 (Versican) variant	Q59FG9_HUMAN	80Step_Domain_p1520.0_to_1600.0	1520	1600	80.0 AA STEP	80	0	0	0	0	1	1	-0.0125	1	0	1		ATEVTFGEEVEK ATEVTFGEEVEK	0	0	0	0	1	1
N/A	Chondroitin sulfate proteoglycan 2 (Versican) variant	Q59FG9_HUMAN	80Step_Domain_p1600.0_to_1680.0	1600	1680	80.0 AA STEP	80	0	0	0	0	0	0	0	1	0	0			0	0	0	0	0	0
N/A	Chondroitin sulfate proteoglycan 2 (Versican) variant	Q59FG9_HUMAN	80Step_Domain_p1680.0_to_1760.0	1680	1760	80.0 AA STEP	80	0	0	0	0	0	0	0	1	0	0			0	0	0	0	0	0
N/A	Chondroitin sulfate proteoglycan 2 (Versican) variant	Q59FG9_HUMAN	80Step_Domain_p1760.0_to_1840.0	1760	1840	80.0 AA STEP	80	0	0	0	0	0	0	0	1	0	0			0	0	0	0	0	0
N/A	Chondroitin sulfate proteoglycan 2 (Versican) variant	Q59FG9_HUMAN	80Step_Domain_p1840.0_to_1920.0	1840	1920	80.0 AA STEP	80	0	0	0	0	0	0	0	1	0	0			0	0	0	0	0	0
N/A	Chondroitin sulfate proteoglycan 2 (Versican) variant	Q59FG9_HUMAN	80Step_Domain_p1920.0_to_2000.0	1920	2000	80.0 AA STEP	80	3	4	3	4	3	4	-0.0125	1	3	4	LGEPNYGAEIR LGEPNYGAEIR LGEPNYGAEIR	LGEPNYGAEIR LGEPNYGAEIR LGEPNYGAEIR	1	2	3	6	5	5
N/A	Chondroitin sulfate proteoglycan 2 (Versican) variant	Q59FG9_HUMAN	80Step_Domain_p2000.0_to_2080.0	2000	2080	80.0 AA STEP	80	0	0	0	0	0	0	0	1	0	0			0	0	0	0	0	0
N/A	Chondroitin sulfate proteoglycan 2 (Versican) variant	Q59FG9_HUMAN	80Step_Domain_p2080.0_to_2160.0	2080	2160	80.0 AA STEP	80	9	9	7	19	19	15	-0.125	0.0473	8	18	QEIESETTSEEQIQEEK QEIESETTSEEQIQEEK QEVNPVRQEIESETTSEEQIQEEK QEIESETTSEEQIQEEK	QEIESETTSEEQIQEEK QEVNPVRQEIESETTSEEQIQEEK QEIESETTSEEQIQEEK QEVNPVRQEIESETTSEEQIQEEK QEIESETTSEEQIQEEK QEVNPVRQEIESETTSEEQIQEEK	3	4	8	30	31	21
N/A	Chondroitin sulfate proteoglycan 2 (Versican) variant	Q59FG9_HUMAN	80Step_Domain_p2160.0_to_2240.0	2160	2240	80.0 AA STEP	80	0	0	0	0	0	0	0	1	0	0			0	0	0	0	0	0
N/A	Chondroitin sulfate proteoglycan 2 (Versican) variant	Q59FG9_HUMAN	80Step_Domain_p2240.0_to_2320.0	2240	2320	80.0 AA STEP	80	0	0	0	0	0	0	0	1	0	0			0	0	0	0	0	0
N/A	Chondroitin sulfate proteoglycan 2 (Versican) variant	Q59FG9_HUMAN	80Step_Domain_p2320.0_to_2400.0	2320	2400	80.0 AA STEP	80	0	0	0	0	0	0	0	1	0	0			0	0	0	0	0	0
N/A	Chondroitin sulfate proteoglycan 2 (Versican) variant	Q59FG9_HUMAN	80Step_Domain_p2400.0_to_2480.0	2400	2480	80.0 AA STEP	80	0	0	0	0	0	0	0	1	0	0			0	0	0	0	0	0
N/A	Chondroitin sulfate proteoglycan 2 (Versican) variant	Q59FG9_HUMAN	80Step_Domain_p2480.0_to_2560.0	2480	2560	80.0 AA STEP	80	0	0	0	0	0	0	0	1	0	0			0	0	0	0	0	0
N/A	Chondroitin sulfate proteoglycan 2 (Versican) variant	Q59FG9_HUMAN	80Step_Domain_p2560.0_to_2640.0	2560	2640	80.0 AA STEP	80	0	0	0	0	0	0	0	1	0	0			0	0	0	0	0	0
N/A	Chondroitin sulfate proteoglycan 2 (Versican) variant	Q59FG9_HUMAN	80Step_Domain_p2640.0_to_2720.0	2640	2720	80.0 AA STEP	80	0	0	0	0	0	0	0	1	0	0			0	0	0	0	0	0
N/A	Chondroitin sulfate proteoglycan 2 (Versican) variant	Q59FG9_HUMAN	80Step_Domain_p2720.0_to_2800.0	2720	2800	80.0 AA STEP	80	0	0	0	0	0	0	0	1	0	0			0	0	0	0	0	0
N/A	Chondroitin sulfate proteoglycan 2 (Versican) variant	Q59FG9_HUMAN	80Step_Domain_p2800.0_to_2880.0	2800	2880	80.0 AA STEP	80	0	0	0	0	0	0	0	1	0	0			0	0	0	0	0	0
N/A	Chondroitin sulfate proteoglycan 2 (Versican) variant	Q59FG9_HUMAN	80Step_Domain_p2880.0_to_2960.0	2880	2960	80.0 AA STEP	80	0	0	0	0	0	0	0	1	0	0			0	0	0	0	0	0
N/A	Chondroitin sulfate proteoglycan 2 (Versican) variant	Q59FG9_HUMAN	80Step_Domain_p2960.0_to_3040.0	2960	3040	80.0 AA STEP	80	0	0	1	1	1	0	-0.0125	1	0	1	GQDSTIAASEQQVAAR	GQDSTIAASEQQVAAR GQDSTIAASEQQVAAR	0	0	1	1	1	0
N/A	Chondroitin sulfate proteoglycan 2 (Versican) variant	Q59FG9_HUMAN	80Step_Domain_p3040.0_to_3120.0	3040	3120	80.0 AA STEP	80	0	0	1	1	1	0	-0.0125	1	0	1	GQDSTIAASEQQVAAR	GQDSTIAASEQQVAAR GQDSTIAASEQQVAAR	0	0	1	1	1	0
N/A	Chondroitin sulfate proteoglycan 2 (Versican) variant	Q59FG9_HUMAN	80Step_Domain_p3120.0_to_3200.0	3120	3200	80.0 AA STEP	80	0	0	2	1	2	1	0	1	1	1	NGATCVDGFNTFR	NGATCVDGFNTFR NGATCVDGFNTFR NGATCVDGFNTFR	0	0	2	2	3	1
N/A	Chondroitin sulfate proteoglycan 2 (Versican) variant	Q59FG9_HUMAN	80Step_Domain_p3200.0_to_3280.0	3200	3280	80.0 AA STEP	80	3	38	19	8	2	6	0.1875	0	20	5	VGHDYQWIGLNDK LQGAHLTSILSHEEQMFVNR VGHDYQWIGLNDK LQGAHLTSILSHEEQMFVNR VGHDYQWIGLNDK	VGHDYQWIGLNDK LQGAHLTSILSHEEQMFVNR VGHDYQWIGLNDK VGHDYQWIGLNDK	1	17	22	13	3	8
N/A	Chondroitin sulfate proteoglycan 2 (Versican) variant	Q59FG9_HUMAN	80Step_Domain_p3280.0_to_3360.0	3280	3360	80.0 AA STEP	80	3	7	3	2	1	1	0.0375	1	4	1	YEINSLIR YEINSLIR YEINSLIR	YEINSLIR YEINSLIR YEINSLIR	1	3	3	3	2	2
N/A	Chondroitin sulfate proteoglycan 2 (Versican) variant	Q59FG9_HUMAN	80Step_Domain_p3360.0_to_3410.0	3360	3410	80.0 AA STEP	50	0	0	0	0	0	0	0	1	0	0			0	0	0	0	0	0
N/A	Chondroitin sulfate proteoglycan 2 (Versican) variant	Q59FG9_HUMAN	100Step_Domain_p0_to_100	0	100	100.0 AA STEP	100	0	0	1	0	0	0	0	1	0	0	ETTVLVAQNGNIK		0	0	1	0	0	0
N/A	Chondroitin sulfate proteoglycan 2 (Versican) variant	Q59FG9_HUMAN	100Step_Domain_p100.0_to_200.0	100	200	100.0 AA STEP	100	84	66	58	70	77	81	-0.07	1	69	76	CDVMYGIEDTQDTVSLTVDGVVFHYR LLASDAGLYR VSVPTHPEAVGDASLTVVK YTLNFEAAQK AATSRYTLNFEAAQK CDVMYGIEDTQDTVSLTVDGVVFHYR LLASDAGLYR VSVPTHPEAVGDASLTVVK YTLNFEAAQK CDVMYGIEDTQDTVSLTVDGVVFHYR ETTVLVAQNGNIK LLASDAGLYR VSVPTHPEAVGDASLTVVK YTLNFEAAQK	LLASDAGLYR VSVPTHPEAVGDASLTVVK YTLNFEAAQK AATSRYTLNFEAAQK CDVMYGIEDTQDTVSLTVDGVVFHYR LLASDAGLYR VSVPTHPEAVGDASLTVVK YTLNFEAAQK CDVMYGIEDTQDTVSLTVDGVVFHYR LLASDAGLYR VSVPTHPEAVGDASLTVVK YTLNFEAAQK	28	30	67	108	128	113
N/A	Chondroitin sulfate proteoglycan 2 (Versican) variant	Q59FG9_HUMAN	100Step_Domain_p200.0_to_300.0	200	300	100.0 AA STEP	100	42	22	39	34	40	20	0.03	1	34	31	FTFEEAAK LATVGELQAAWR SPQETYDVYCYVDHLDGDVFHLTVPSK FTFEEAAK LATVGELQAAWR FTFEEAAK FTFEEAAKECENQDAR LATVGELQAAWR SPQETYDVYCYVDHLDGDVFHLTVPSK	FTFEEAAK FTFEEAAKECENQDAR LATVGELQAAWR FTFEEAAK FTFEEAAKECENQDAR LATVGELQAAWR SPQETYDVYCYVDHLDGDVFHLTVPSK FTFEEAAK FTFEEAAKECENQDAR LATVGELQAAWR	14	10	45	53	66	28
N/A	Chondroitin sulfate proteoglycan 2 (Versican) variant	Q59FG9_HUMAN	100Step_Domain_p300.0_to_400.0	300	400	100.0 AA STEP	100	63	42	51	40	44	30	0.14	0	52	38	LATVGELQAAWR NGFDQCDYGWLSDASVR LATVGELQAAWR NGFDQCDYGWLSDASVR AQCGGGLLGVR LATVGELQAAWR NGFDQCDYGWLSDASVR	AQCGGGLLGVR LATVGELQAAWR NGFDQCDYGWLSDASVR AQCGGGLLGVR LATVGELQAAWR NGFDQCDYGWLSDASVR FENQTGFPPPDSR LATVGELQAAWR NGFDQCDYGWLSDASVR	21	19	59	62	73	42
N/A	Chondroitin sulfate proteoglycan 2 (Versican) variant	Q59FG9_HUMAN	100Step_Domain_p400.0_to_500.0	400	500	100.0 AA STEP	100	0	0	0	0	0	0	0	1	0	0			0	0	0	0	0	0
N/A	Chondroitin sulfate proteoglycan 2 (Versican) variant	Q59FG9_HUMAN	100Step_Domain_p500.0_to_600.0	500	600	100.0 AA STEP	100	0	0	0	0	0	0	0	1	0	0			0	0	0	0	0	0
N/A	Chondroitin sulfate proteoglycan 2 (Versican) variant	Q59FG9_HUMAN	100Step_Domain_p600.0_to_700.0	600	700	100.0 AA STEP	100	0	4	3	5	3	3	-0.02	1	2	4	ITEEFLGK ITEEFLGK	ITEEFLGK ITEEFLGK ITEEFLGK	0	2	3	7	5	4
N/A	Chondroitin sulfate proteoglycan 2 (Versican) variant	Q59FG9_HUMAN	100Step_Domain_p700.0_to_800.0	700	800	100.0 AA STEP	100	0	2	1	3	2	2	-0.01	1	1	2	TEEEVFSGMK TEEEVFSGMK	TEEEVFSGMK TEEEVFSGMK TEEEVFSGMK	0	1	1	4	4	3
N/A	Chondroitin sulfate proteoglycan 2 (Versican) variant	Q59FG9_HUMAN	100Step_Domain_p800.0_to_900.0	800	900	100.0 AA STEP	100	0	0	0	1	1	1	-0.01	1	0	1		QLEEVTDEDIAAHGK QLEEVTDEDIAAHGK QLEEVTDEDIAAHGK	0	0	0	1	2	2
N/A	Chondroitin sulfate proteoglycan 2 (Versican) variant	Q59FG9_HUMAN	100Step_Domain_p900.0_to_1000.0	900	1000	100.0 AA STEP	100	0	0	0	0	0	0	0	1	0	0			0	0	0	0	0	0
N/A	Chondroitin sulfate proteoglycan 2 (Versican) variant	Q59FG9_HUMAN	100Step_Domain_p1000.0_to_1100.0	1000	1100	100.0 AA STEP	100	0	0	0	0	0	0	0	1	0	0			0	0	0	0	0	0
N/A	Chondroitin sulfate proteoglycan 2 (Versican) variant	Q59FG9_HUMAN	100Step_Domain_p1100.0_to_1200.0	1100	1200	100.0 AA STEP	100	0	0	0	0	0	0	0	1	0	0			0	0	0	0	0	0
N/A	Chondroitin sulfate proteoglycan 2 (Versican) variant	Q59FG9_HUMAN	100Step_Domain_p1200.0_to_1300.0	1200	1300	100.0 AA STEP	100	0	0	0	0	0	0	0	1	0	0			0	0	0	0	0	0
N/A	Chondroitin sulfate proteoglycan 2 (Versican) variant	Q59FG9_HUMAN	100Step_Domain_p1300.0_to_1400.0	1300	1400	100.0 AA STEP	100	15	13	26	31	30	43	-0.17	0	18	35	MSDLSVIGHPIDSESK FHPDINVYIIEVR MSDLSVIGHPIDSESK FHPDINVYIIEVR MSDLSVIGHPIDSESK	MSDLSVIGHPIDSESK MSDLSVIGHPIDSESK MSDLSVIGHPIDSESK	5	6	30	48	50	59
N/A	Chondroitin sulfate proteoglycan 2 (Versican) variant	Q59FG9_HUMAN	100Step_Domain_p1400.0_to_1500.0	1400	1500	100.0 AA STEP	100	0	0	0	0	0	0	0	1	0	0			0	0	0	0	0	0
N/A	Chondroitin sulfate proteoglycan 2 (Versican) variant	Q59FG9_HUMAN	100Step_Domain_p1500.0_to_1600.0	1500	1600	100.0 AA STEP	100	0	0	0	0	1	1	-0.01	1	0	1		ATEVTFGEEVEK ATEVTFGEEVEK	0	0	0	0	1	1
N/A	Chondroitin sulfate proteoglycan 2 (Versican) variant	Q59FG9_HUMAN	100Step_Domain_p1600.0_to_1700.0	1600	1700	100.0 AA STEP	100	0	0	0	0	0	0	0	1	0	0			0	0	0	0	0	0
N/A	Chondroitin sulfate proteoglycan 2 (Versican) variant	Q59FG9_HUMAN	100Step_Domain_p1700.0_to_1800.0	1700	1800	100.0 AA STEP	100	0	0	0	0	0	0	0	1	0	0			0	0	0	0	0	0
N/A	Chondroitin sulfate proteoglycan 2 (Versican) variant	Q59FG9_HUMAN	100Step_Domain_p1800.0_to_1900.0	1800	1900	100.0 AA STEP	100	0	0	0	0	0	0	0	1	0	0			0	0	0	0	0	0
N/A	Chondroitin sulfate proteoglycan 2 (Versican) variant	Q59FG9_HUMAN	100Step_Domain_p1900.0_to_2000.0	1900	2000	100.0 AA STEP	100	3	4	3	4	3	4	-0.01	1	3	4	LGEPNYGAEIR LGEPNYGAEIR LGEPNYGAEIR	LGEPNYGAEIR LGEPNYGAEIR LGEPNYGAEIR	1	2	3	6	5	5
N/A	Chondroitin sulfate proteoglycan 2 (Versican) variant	Q59FG9_HUMAN	100Step_Domain_p2000.0_to_2100.0	2000	2100	100.0 AA STEP	100	0	0	0	0	0	0	0	1	0	0			0	0	0	0	0	0
N/A	Chondroitin sulfate proteoglycan 2 (Versican) variant	Q59FG9_HUMAN	100Step_Domain_p2100.0_to_2200.0	2100	2200	100.0 AA STEP	100	9	9	7	19	19	15	-0.1	0.1225	8	18	QEIESETTSEEQIQEEK QEIESETTSEEQIQEEK QEVNPVRQEIESETTSEEQIQEEK QEIESETTSEEQIQEEK	QEIESETTSEEQIQEEK QEVNPVRQEIESETTSEEQIQEEK QEIESETTSEEQIQEEK QEVNPVRQEIESETTSEEQIQEEK QEIESETTSEEQIQEEK QEVNPVRQEIESETTSEEQIQEEK	3	4	8	30	31	21
N/A	Chondroitin sulfate proteoglycan 2 (Versican) variant	Q59FG9_HUMAN	100Step_Domain_p2200.0_to_2300.0	2200	2300	100.0 AA STEP	100	0	0	0	0	0	0	0	1	0	0			0	0	0	0	0	0
N/A	Chondroitin sulfate proteoglycan 2 (Versican) variant	Q59FG9_HUMAN	100Step_Domain_p2300.0_to_2400.0	2300	2400	100.0 AA STEP	100	0	0	0	0	0	0	0	1	0	0			0	0	0	0	0	0
N/A	Chondroitin sulfate proteoglycan 2 (Versican) variant	Q59FG9_HUMAN	100Step_Domain_p2400.0_to_2500.0	2400	2500	100.0 AA STEP	100	0	0	0	0	0	0	0	1	0	0			0	0	0	0	0	0
N/A	Chondroitin sulfate proteoglycan 2 (Versican) variant	Q59FG9_HUMAN	100Step_Domain_p2500.0_to_2600.0	2500	2600	100.0 AA STEP	100	0	0	0	0	0	0	0	1	0	0			0	0	0	0	0	0
N/A	Chondroitin sulfate proteoglycan 2 (Versican) variant	Q59FG9_HUMAN	100Step_Domain_p2600.0_to_2700.0	2600	2700	100.0 AA STEP	100	0	0	0	0	0	0	0	1	0	0			0	0	0	0	0	0
N/A	Chondroitin sulfate proteoglycan 2 (Versican) variant	Q59FG9_HUMAN	100Step_Domain_p2700.0_to_2800.0	2700	2800	100.0 AA STEP	100	0	0	0	0	0	0	0	1	0	0			0	0	0	0	0	0
N/A	Chondroitin sulfate proteoglycan 2 (Versican) variant	Q59FG9_HUMAN	100Step_Domain_p2800.0_to_2900.0	2800	2900	100.0 AA STEP	100	0	0	0	0	0	0	0	1	0	0			0	0	0	0	0	0
N/A	Chondroitin sulfate proteoglycan 2 (Versican) variant	Q59FG9_HUMAN	100Step_Domain_p2900.0_to_3000.0	2900	3000	100.0 AA STEP	100	0	0	0	0	0	0	0	1	0	0			0	0	0	0	0	0
N/A	Chondroitin sulfate proteoglycan 2 (Versican) variant	Q59FG9_HUMAN	100Step_Domain_p3000.0_to_3100.0	3000	3100	100.0 AA STEP	100	0	0	1	1	1	0	-0.01	1	0	1	GQDSTIAASEQQVAAR	GQDSTIAASEQQVAAR GQDSTIAASEQQVAAR	0	0	1	1	1	0
N/A	Chondroitin sulfate proteoglycan 2 (Versican) variant	Q59FG9_HUMAN	100Step_Domain_p3100.0_to_3200.0	3100	3200	100.0 AA STEP	100	0	0	2	1	2	1	0	1	1	1	NGATCVDGFNTFR	NGATCVDGFNTFR NGATCVDGFNTFR NGATCVDGFNTFR	0	0	2	2	3	1
N/A	Chondroitin sulfate proteoglycan 2 (Versican) variant	Q59FG9_HUMAN	100Step_Domain_p3200.0_to_3300.0	3200	3300	100.0 AA STEP	100	3	38	19	8	2	6	0.15	0	20	5	VGHDYQWIGLNDK LQGAHLTSILSHEEQMFVNR VGHDYQWIGLNDK LQGAHLTSILSHEEQMFVNR VGHDYQWIGLNDK	VGHDYQWIGLNDK LQGAHLTSILSHEEQMFVNR VGHDYQWIGLNDK VGHDYQWIGLNDK	1	17	22	13	3	8
N/A	Chondroitin sulfate proteoglycan 2 (Versican) variant	Q59FG9_HUMAN	100Step_Domain_p3300.0_to_3400.0	3300	3400	100.0 AA STEP	100	3	7	3	2	1	1	0.03	1	4	1	YEINSLIR YEINSLIR YEINSLIR	YEINSLIR YEINSLIR YEINSLIR	1	3	3	3	2	2
N/A	Chondroitin sulfate proteoglycan 2 (Versican) variant	Q59FG9_HUMAN	100Step_Domain_p3400.0_to_3410.0	3400	3410	100.0 AA STEP	10	0	0	0	0	0	0	0	1	0	0			0	0	0	0	0	0
HSP90AA1	Heat shock protein HSP 90-alpha	HS90A_HUMAN	50Step_Domain_p50.0_to_100.0	50	100	50.0 AA STEP	50	0	0	0	0	1	1	-0.02	0.0045	0	1		ELISNSSDALDK ELISNSSDALDK	0	0	0	0	2	1
HSP90AA1	Heat shock protein HSP 90-alpha	HS90A_HUMAN	50Step_Domain_p250.0_to_300.0	250	300	50.0 AA STEP	50	0	0	0	0	1	1	-0.02	0.0045	0	1		NPDDITNEEYGEFYK NPDDITNEEYGEFYK	0	0	0	0	1	2
HSP90AA1	Heat shock protein HSP 90-alpha	HS90A_HUMAN	50Step_Domain_p300.0_to_350.0	300	350	50.0 AA STEP	50	0	0	0	0	1	1	-0.02	0.0045	0	1		NPDDITNEEYGEFYK NPDDITNEEYGEFYK	0	0	0	0	1	2
CHID1	Chitinase domain containing 1; isoform CRA_a	A0A024RCB5_HUMAN	50Step_Domain_p150.0_to_200.0	150	200	50.0 AA STEP	50	0	1	2	0	0	0	0.02	0.0048	1	0	NVLDSEDEIEELSK LLFEDWTYDDFR NVLDSEDEIEELSK		0	1	3	0	0	0
CHID1	Chitinase domain-containing protein 1	CHID1_HUMAN	50Step_Domain_p150.0_to_200.0	150	200	50.0 AA STEP	50	0	1	2	0	0	0	0.02	0.0048	1	0	NVLDSEDEIEELSK LLFEDWTYDDFR NVLDSEDEIEELSK		0	1	3	0	0	0
N/A	Cartilage oligomeric matrix protein variant	Q53FR6_HUMAN	50Step_Domain_p400.0_to_450.0	400	450	50.0 AA STEP	50	0	0	3	0	0	0	0.02	0.0048	1	0	GNCPTVPNSAQEDSDHDGQGDACDDDDDNDGVPDSR SNPDQADVDHDFVGDACDSDQDQNGDGHQDSR		0	0	5	0	0	0
N/A	Coagulation factor XII (Hageman factor)	Q96EF3_HUMAN	80Step_Domain_p0_to_80	0	80	80.0 AA STEP	80	2	3	0	0	0	0	0.025	0.1596	2	0	VVGGLVALR VVGGLVALR		4	3	0	0	0	0
N/A	Coagulation factor XII (Hageman factor)	Q96EF3_HUMAN	80Step_Domain_p80.0_to_160.0	80	160	80.0 AA STEP	80	4	3	0	0	0	0	0.025	0.026	2	0	LHEAFSPVSYQHDLALLR LHEAFSPVSYQHDLALLR		7	3	0	0	0	0
N/A	Coagulation factor XII (Hageman factor)	Q96EF3_HUMAN	80Step_Domain_p160.0_to_240.0	160	240	80.0 AA STEP	80	0	0	0	0	0	0	0	1	0	0			0	0	0	0	0	0
N/A	Coagulation factor XII (Hageman factor)	Q96EF3_HUMAN	80Step_Domain_p240.0_to_300.0	240	300	80.0 AA STEP	60	0	0	0	0	0	0	0	1	0	0			0	0	0	0	0	0
N/A	Coagulation factor XII (Hageman factor)	Q96EF3_HUMAN	100Step_Domain_p0_to_100	0	100	100.0 AA STEP	100	2	3	0	0	0	0	0.02	0.2301	2	0	VVGGLVALR VVGGLVALR		4	3	0	0	0	0
N/A	Coagulation factor XII (Hageman factor)	Q96EF3_HUMAN	100Step_Domain_p100.0_to_200.0	100	200	100.0 AA STEP	100	4	3	0	0	0	0	0.02	0.0567	2	0	LHEAFSPVSYQHDLALLR LHEAFSPVSYQHDLALLR		7	3	0	0	0	0
N/A	Coagulation factor XII (Hageman factor)	Q96EF3_HUMAN	100Step_Domain_p200.0_to_300.0	200	300	100.0 AA STEP	100	0	0	0	0	0	0	0	1	0	0			0	0	0	0	0	0
N/A	Chordin	B7Z1H7_HUMAN	Disordered	54	94	REGIONS	40	2	3	3	2	0	0	0.05	0.0018	3	1	GDGHTDFVALLTGPR GDGHTDFVALLTGPR GDGHTDFVALLTGPR	GDGHTDFVALLTGPR QPSGLSFEYPR	1	2	4	2	0	0
N/A	Chordin	B7Z1H7_HUMAN	Disordered_601_629	601	629	REGIONS	28	0	0	0	0	0	0	0	1	0	0			0	0	0	0	0	0
N/A	Chordin	B7Z1H7_HUMAN	Disordered_860_881	860	881	REGIONS	21	0	0	0	0	0	0	0	1	0	0			0	0	0	0	0	0
N/A	Chordin	B7Z1H7_HUMAN	CHRD	94	203	DOMAINS	109	2	3	3	1	0	0	0.0275229	0.0345	3	0	GDGHTDFVALLTGPR GDGHTDFVALLTGPR GDGHTDFVALLTGPR	GDGHTDFVALLTGPR	1	2	4	1	0	0
N/A	Chordin	B7Z1H7_HUMAN	CHRD_205_328	205	328	DOMAINS	123	2	3	1	1	0	0	0.0162602	0.219	2	0	LQILHQGQLLR LQILHQGQLLR LQILHQGQLLR SGGLTQVPLR	SGGLTQVPLR	1	2	2	1	0	0
N/A	Chordin	B7Z1H7_HUMAN	CHRD_329_450	329	450	DOMAINS	121	0	0	1	0	0	2	-0.00826446	1	0	1	DFPDGELR	DFPDGELR	0	0	1	0	0	1
N/A	Chordin	B7Z1H7_HUMAN	CHRD_456_576	456	576	DOMAINS	120	2	1	3	1	5	2	-0.00833333	1	2	3	DLEPELLR DLEPELLR DLEPELLR GFYGSEAQGVVK	DLEPELLR DLEPELLR DLEPELLR	1	1	4	1	2	1
N/A	Chordin	B7Z1H7_HUMAN	VWFC	629	689	DOMAINS	60	0	0	0	0	0	0	0	1	0	0			0	0	0	0	0	0
ANXA2	Annexin A2	ANXA2_HUMAN	50Step_Domain_p0_to_50	0	50	50.0 AA STEP	50	13	15	11	5	8	8	0.12	0.0049	13	7	AYTNFDAER DALNIETAIK GVDEVTIVNILTNR AYTNFDAER GVDEVTIVNILTNR LSLEGDHSTPPSAYGSVK AYTNFDAER DALNIETAIK GVDEVTIVNILTNR LSLEGDHSTPPSAYGSVK	AYTNFDAER GVDEVTIVNILTNR LSLEGDHSTPPSAYGSVK GVDEVTIVNILTNR AYTNFDAER DALNIETAIK GVDEVTIVNILTNR LSLEGDHSTPPSAYGSVK	6	8	9	5	6	12
HEL-S-270	Annexin	V9HW65_HUMAN	50Step_Domain_p0_to_50	0	50	50.0 AA STEP	50	13	15	11	5	8	8	0.12	0.0049	13	7	AYTNFDAER DALNIETAIK GVDEVTIVNILTNR AYTNFDAER GVDEVTIVNILTNR LSLEGDHSTPPSAYGSVK AYTNFDAER DALNIETAIK GVDEVTIVNILTNR LSLEGDHSTPPSAYGSVK	AYTNFDAER GVDEVTIVNILTNR LSLEGDHSTPPSAYGSVK GVDEVTIVNILTNR AYTNFDAER DALNIETAIK GVDEVTIVNILTNR LSLEGDHSTPPSAYGSVK	6	8	9	5	6	12
N/A	cDNA FLJ75416; highly similar to Homo sapiens complement factor H (CFH); mRNA	A8K5T0_HUMAN	50Step_Domain_p1150.0_to_1200.0	1150	1200	50.0 AA STEP	50	3	5	5	16	14	9	-0.18	0.005	4	13	EIMENYNIALR EIMENYNIALR EIMENYNIALR	EIMENYNIALR EIMENYNIALR EIMENYNIALR	6	6	2	3	2	2
CFH	Complement factor H	CFAH_HUMAN	50Step_Domain_p1150.0_to_1200.0	1150	1200	50.0 AA STEP	50	3	5	5	16	14	9	-0.18	0.005	4	13	EIMENYNIALR EIMENYNIALR EIMENYNIALR	EIMENYNIALR EIMENYNIALR EIMENYNIALR	6	6	2	3	2	2
IGHM	Immunoglobulin heavy constant mu	IGHM_HUMAN	50Step_Domain_p350.0_to_400.0	350	400	50.0 AA STEP	50	28	31	16	0	0	0	0.5	0.005	25	0	GQPLSPEK YFAHSILTVSEEEWNTGETYTCVVAHEALPNR YVTSAPMPEPQAPGR YFAHSILTVSEEEWNTGETYTCVVAHEALPNR YVTSAPMPEPQAPGR YVTSAPMPEPQAPGR		56	35	1	0	0	0
MMP3	Stromelysin-1	MMP3_HUMAN	50Step_Domain_p50.0_to_100.0	50	100	50.0 AA STEP	50	8	5	4	4	0	4	0.06	0.005	6	3	FLGLEVTGK LDSDTLEVMR FLGLEVTGK LDSDTLEVMR FLGLEVTGK LDSDTLEVMR	FLGLEVTGK LDSDTLEVMR FLGLEVTGK LDSDTLEVMR	3	4	7	4	0	3
PYGB	Glycogen phosphorylase; brain form	PYGB_HUMAN	50Step_Domain_p700.0_to_750.0	700	750	50.0 AA STEP	50	0	2	0	2	2	2	-0.02	0.0051	1	2	VEDVEALDR	EYYDHLPELK VEDVEALDR VEDVEALDR EYYDHLPELK VEDVEALDR	0	1	0	2	2	4
RARRES2	Retinoic acid receptor responder protein 2	RARR2_HUMAN	50Step_Domain_p0_to_50	0	50	50.0 AA STEP	50	0	4	4	0	0	0	0.06	0.0052	3	0	GLQVALEEFHK HPPVQWAFQETSVESAVDTPFPAGIFVR GLQVALEEFHK HPPVQWAFQETSVESAVDTPFPAGIFVR		0	8	5	0	0	0
DAG1	Dystroglycan	DAG1_HUMAN	50Step_Domain_p100.0_to_150.0	100	150	50.0 AA STEP	50	0	1	1	0	0	0	0.02	0.0054	1	0	GVHYISVSATR GVHYISVSATR		0	1	1	0	0	0
N/A	Immunoglobulin kappa light chain	IGK_HUMAN	50Step_Domain_p0_to_50	0	50	50.0 AA STEP	50	10	7	0	0	0	0	0.12	0.0055	6	0	DIQMTQSPSTLSASVGDR DIQMTQSPSTLSASVGDR		19	12	0	0	0	0
N/A	Macrophage-capping protein	B4DU58_HUMAN	50Step_Domain_p200.0_to_250.0	200	250	50.0 AA STEP	50	1	0	1	0	0	0	0.02	0.0056	1	0	EGNPEEDLTADK VSDATGQMNLTK EGNPEEDLTADK		2	0	1	0	0	0
MMP2	72 kDa type IV collagenase	MMP2_HUMAN	50Step_Domain_p150.0_to_200.0	150	200	50.0 AA STEP	50	2	2	0	0	0	0	0.02	0.0056	1	0	AFQVWSDVTPLR IHDGEADIMINFGR AFQVWSDVTPLR DGLLAHAFAPGTGVGGDSHFDDDELWTLGEGQVVR		4	2	0	0	0	0
N/A	Mimecan	B4DI63_HUMAN	50Step_Domain_p250.0_to_300.0	250	300	50.0 AA STEP	50	36	7	11	0	0	0	0.36	0.0056	18	0	LNNLTFLYLDHNALESVPLNLPESLR LNNLTFLYLDHNALESVPLNLPESLR LNNLTFLYLDHNALESVPLNLPESLR VIHLQFNNIASITDDTFCK		53	4	7	0	0	0
ITIH2	Inter-alpha-trypsin inhibitor heavy chain H2	ITIH2_HUMAN	50Step_Domain_p350.0_to_400.0	350	400	50.0 AA STEP	50	15	18	0	0	0	0	0.22	0.0057	11	0	AEDHFSVIDFNQNIR IQPSGGTNINEALLR NDLISATK AEDHFSVIDFNQNIR IQPSGGTNINEALLR TILDDLRAEDHFSVIDFNQNIR		29	9	0	0	0	0
N/A	Immunoglobulin alpha-2 heavy chain	IGA2_HUMAN	50Step_Domain_p250.0_to_300.0	250	300	50.0 AA STEP	50	3	3	0	0	0	0	0.04	0.006	2	0	DASGATFTWTPSSGK DASGATFTWTPSSGK		5	4	0	0	0	0
SRPX2	Sushi repeat-containing protein SRPX2	SRPX2_HUMAN	50Step_Domain_p200.0_to_250.0	200	250	50.0 AA STEP	50	5	7	7	10	11	20	-0.16	0.006	6	14	GPEPGSHFPEGEHVIR GPEPGSHFPEGEHVIR VYWDPPLVK GPEPGSHFPEGEHVIR	GPEPGSHFPEGEHVIR GPEPGSHFPEGEHVIR VYWDPPLVK GPEPGSHFPEGEHVIR VYWDPPLVK	2	6	8	6	6	31
A2M	Alpha-2-macroglobulin	A2MG_HUMAN	50Step_Domain_p700.0_to_750.0	700	750	50.0 AA STEP	50	12	19	17	35	18	41	-0.3	0.006	16	31	LVHVEEPHTETVR VGFYESDVMGR LVHVEEPHTETVR VGFYESDVMGR LVHVEEPHTETVR VGFYESDVMGR	LVHVEEPHTETVR VGFYESDVMGR VGFYESDVMGR LVHVEEPHTETVR VGFYESDVMGR	13	18	31	9	3	6
APOA1	Apolipoprotein A-I	APOA1_HUMAN	50Step_Domain_p100.0_to_150.0	100	150	50.0 AA STEP	50	82	108	101	57	0	0	1.56	0.006	97	19	AELQEGAR EQLGPVTQEFWDNLEK EQLGPVTQEFWDNLEKETEGLR ETEGLRQEMSK KWQEEMELYR LREQLGPVTQEFWDNLEK QEMSKDLEEVK VEPLRAELQEGAR VQPYLDDFQK WQEEMELYR EQLGPVTQEFWDNLEK EQLGPVTQEFWDNLEKETEGLR ETEGLRQEMSKDLEEVK KWQEEMELYR LREQLGPVTQEFWDNLEK LREQLGPVTQEFWDNLEKETEGLR QEMSKDLEEVK VEPLRAELQEGAR VQPYLDDFQK WQEEMELYR EQLGPVTQEFWDNLEK LREQLGPVTQEFWDNLEK VQPYLDDFQK WQEEMELYR	EQLGPVTQEFWDNLEK WQEEMELYR	163	92	9	2	0	0
N/A	Chordin	B7Z1H7_HUMAN	80Step_Domain_p0_to_80	0	80	80.0 AA STEP	80	0	0	0	1	0	0	0	1	0	0		QPSGLSFEYPR	0	0	0	1	0	0
N/A	Chordin	B7Z1H7_HUMAN	80Step_Domain_p80.0_to_160.0	80	160	80.0 AA STEP	80	2	3	3	1	0	0	0.0375	0	3	0	GDGHTDFVALLTGPR GDGHTDFVALLTGPR GDGHTDFVALLTGPR	GDGHTDFVALLTGPR	1	2	4	1	0	0
N/A	Chordin	B7Z1H7_HUMAN	80Step_Domain_p160.0_to_240.0	160	240	80.0 AA STEP	80	0	0	0	0	0	0	0	1	0	0			0	0	0	0	0	0
N/A	Chordin	B7Z1H7_HUMAN	80Step_Domain_p240.0_to_320.0	240	320	80.0 AA STEP	80	2	3	1	1	0	0	0.025	0.024	2	0	LQILHQGQLLR LQILHQGQLLR LQILHQGQLLR SGGLTQVPLR	SGGLTQVPLR	1	2	2	1	0	0
N/A	Chordin	B7Z1H7_HUMAN	80Step_Domain_p320.0_to_400.0	320	400	80.0 AA STEP	80	0	0	0	0	0	0	0	1	0	0			0	0	0	0	0	0
N/A	Chordin	B7Z1H7_HUMAN	80Step_Domain_p400.0_to_480.0	400	480	80.0 AA STEP	80	0	0	1	0	0	2	-0.0125	1	0	1	DFPDGELR	DFPDGELR	0	0	1	0	0	1
N/A	Chordin	B7Z1H7_HUMAN	80Step_Domain_p480.0_to_560.0	480	560	80.0 AA STEP	80	2	1	3	1	5	2	-0.0125	1	2	3	DLEPELLR DLEPELLR DLEPELLR GFYGSEAQGVVK	DLEPELLR DLEPELLR DLEPELLR	1	1	4	1	2	1
N/A	Chordin	B7Z1H7_HUMAN	80Step_Domain_p560.0_to_640.0	560	640	80.0 AA STEP	80	0	0	0	2	2	2	-0.025	0.0036	0	2		LEAAGAEGVR LEAAGAEGVR LEAAGAEGVR	0	0	0	2	1	1
N/A	Chordin	B7Z1H7_HUMAN	80Step_Domain_p640.0_to_720.0	640	720	80.0 AA STEP	80	0	0	0	0	0	0	0	1	0	0			0	0	0	0	0	0
N/A	Chordin	B7Z1H7_HUMAN	80Step_Domain_p720.0_to_800.0	720	800	80.0 AA STEP	80	0	0	0	0	0	0	0	1	0	0			0	0	0	0	0	0
N/A	Chordin	B7Z1H7_HUMAN	80Step_Domain_p800.0_to_880.0	800	880	80.0 AA STEP	80	0	0	0	0	0	0	0	1	0	0			0	0	0	0	0	0
N/A	Chordin	B7Z1H7_HUMAN	80Step_Domain_p880.0_to_881.0	880	881	80.0 AA STEP	1	0	0	0	0	0	0	0	1	0	0			0	0	0	0	0	0
N/A	Chordin	B7Z1H7_HUMAN	100Step_Domain_p0_to_100	0	100	100.0 AA STEP	100	2	3	3	2	0	0	0.02	0.0108	3	1	GDGHTDFVALLTGPR GDGHTDFVALLTGPR GDGHTDFVALLTGPR	GDGHTDFVALLTGPR QPSGLSFEYPR	1	2	4	2	0	0
N/A	Chordin	B7Z1H7_HUMAN	100Step_Domain_p100.0_to_200.0	100	200	100.0 AA STEP	100	2	3	3	1	0	0	0.03	0.0018	3	0	GDGHTDFVALLTGPR GDGHTDFVALLTGPR GDGHTDFVALLTGPR	GDGHTDFVALLTGPR	1	2	4	1	0	0
N/A	Chordin	B7Z1H7_HUMAN	100Step_Domain_p200.0_to_300.0	200	300	100.0 AA STEP	100	2	3	1	1	0	0	0.02	0.0513	2	0	LQILHQGQLLR LQILHQGQLLR LQILHQGQLLR SGGLTQVPLR	SGGLTQVPLR	1	2	2	1	0	0
N/A	Chordin	B7Z1H7_HUMAN	100Step_Domain_p300.0_to_400.0	300	400	100.0 AA STEP	100	0	0	0	0	0	0	0	1	0	0			0	0	0	0	0	0
N/A	Chordin	B7Z1H7_HUMAN	100Step_Domain_p400.0_to_500.0	400	500	100.0 AA STEP	100	0	0	1	0	0	2	-0.01	1	0	1	DFPDGELR	DFPDGELR	0	0	1	0	0	1
N/A	Chordin	B7Z1H7_HUMAN	100Step_Domain_p500.0_to_600.0	500	600	100.0 AA STEP	100	2	1	3	4	7	5	-0.03	0	2	5	DLEPELLR DLEPELLR DLEPELLR GFYGSEAQGVVK	DLEPELLR LEAAGAEGVR DLEPELLR LEAAGAEGVR DLEPELLR LEAAGAEGVR	1	1	4	3	3	2
N/A	Chordin	B7Z1H7_HUMAN	100Step_Domain_p600.0_to_700.0	600	700	100.0 AA STEP	100	0	0	0	0	0	0	0	1	0	0			0	0	0	0	0	0
N/A	Chordin	B7Z1H7_HUMAN	100Step_Domain_p700.0_to_800.0	700	800	100.0 AA STEP	100	0	0	0	0	0	0	0	1	0	0			0	0	0	0	0	0
N/A	Chordin	B7Z1H7_HUMAN	100Step_Domain_p800.0_to_881.0	800	881	100.0 AA STEP	81	0	0	0	0	0	0	0	1	0	0			0	0	0	0	0	0
CHRD	Chordin	E7ESX1_HUMAN	Disordered	124	168	REGIONS	44	2	3	3	2	0	0	0.0454545	0.0018	3	1	GDGHTDFVALLTGPR GDGHTDFVALLTGPR GDGHTDFVALLTGPR	GDGHTDFVALLTGPR QPSGLSFEYPR	1	2	4	2	0	0
CHRD	Chordin	E7ESX1_HUMAN	Disordered_675_703	675	703	REGIONS	28	0	0	0	0	0	0	0	1	0	0			0	0	0	0	0	0
CHRD	Chordin	E7ESX1_HUMAN	Disordered_934_954	934	954	REGIONS	20	0	0	0	0	0	0	0	1	0	0			0	0	0	0	0	0
CHRD	Chordin	E7ESX1_HUMAN	VWFC	49	126	DOMAINS	77	0	0	0	0	0	0	0	1	0	0			0	0	0	0	0	0
CHRD	Chordin	E7ESX1_HUMAN	CHRD	168	277	DOMAINS	109	2	3	3	1	0	0	0.0275229	0.018	3	0	GDGHTDFVALLTGPR GDGHTDFVALLTGPR GDGHTDFVALLTGPR	GDGHTDFVALLTGPR	1	2	4	1	0	0
CHRD	Chordin	E7ESX1_HUMAN	CHRD_279_402	279	402	DOMAINS	123	2	3	1	1	0	0	0.0162602	0.1614	2	0	LQILHQGQLLR LQILHQGQLLR LQILHQGQLLR SGGLTQVPLR	SGGLTQVPLR	1	2	2	1	0	0
CHRD	Chordin	E7ESX1_HUMAN	CHRD_403_524	403	524	DOMAINS	121	0	0	1	0	0	2	-0.00826446	1	0	1	DFPDGELR	DFPDGELR	0	0	1	0	0	1
CHRD	Chordin	E7ESX1_HUMAN	CHRD_530_650	530	650	DOMAINS	120	2	1	3	1	5	2	-0.00833333	1	2	3	DLEPELLR DLEPELLR DLEPELLR GFYGSEAQGVVK	DLEPELLR DLEPELLR DLEPELLR	1	1	4	1	2	1
CHRD	Chordin	E7ESX1_HUMAN	VWFC_703_763	703	763	DOMAINS	60	0	0	0	0	0	0	0	1	0	0			0	0	0	0	0	0
MRC2	C-type mannose receptor 2	MRC2_HUMAN	50Step_Domain_p100.0_to_150.0	100	150	50.0 AA STEP	50	0	0	1	0	0	0	0	0.006	0	0	TLGDQLSLLLGAR		0	0	1	0	0	0
MRC2	C-type mannose receptor 2	MRC2_HUMAN	50Step_Domain_p1150.0_to_1200.0	1150	1200	50.0 AA STEP	50	0	0	1	0	0	0	0	0.006	0	0	TPLWIGLAGEEGSR		0	0	1	0	0	0
COL12A1	Collagen alpha-1(XII) chain	COCA1_HUMAN	50Step_Domain_p2600.0_to_2650.0	2600	2650	50.0 AA STEP	50	4	6	6	1	1	3	0.06	0.0062	5	2	GEVQTVTFDTEEVK LLPETPSDPFAIWQITDR GEVQTVTFDTEEVK GEVQTVTFDTEEVK LLPETPSDPFAIWQITDR	LLPETPSDPFAIWQITDR LLPETPSDPFAIWQITDR GEVQTVTFDTEEVK LLPETPSDPFAIWQITDR	3	1	2	2	1	5
CHAD	Chondroadherin	CHAD_HUMAN	50Step_Domain_p100.0_to_150.0	100	150	50.0 AA STEP	50	114	47	26	6	26	0	1.02	0.0064	62	11	AGAFDDLTELTYLYLDHNK QLIYLYLSHNDIR AGAFDDLTELTYLYLDHNK QLIYLYLSHNDIR AGAFDDLTELTYLYLDHNK QLIYLYLSHNDIR	QLIYLYLSHNDIR AGAFDDLTELTYLYLDHNK QLIYLYLSHNDIR	78	22	24	9	38	0
COL6A3	Collagen alpha-3(VI) chain	CO6A3_HUMAN	50Step_Domain_p1400.0_to_1450.0	1400	1450	50.0 AA STEP	50	23	22	13	10	5	8	0.22	0.0064	19	8	ELPSLEQK LLTPITTLTSEQIQK ELPSLEQK LLTPITTLTSEQIQK YPPPAVESDAADIVFLIDSSEGVRPDGFAHIR ELPSLEQK LLTPITTLTSEQIQK	ELPSLEQK LLTPITTLTSEQIQK ELPSLEQK LLTPITTLTSEQIQK ELPSLEQK LLTPITTLTSEQIQK	11	10	7	13	8	13
PLXDC2	Plexin domain-containing protein 2	PXDC2_HUMAN	50Step_Domain_p150.0_to_200.0	150	200	50.0 AA STEP	50	0	2	2	0	0	0	0.02	0.0066	1	0	EITVATGGFIYTGEVVHR EITVATGGFIYTGEVVHR		0	3	4	0	0	0
N/A	Glucosylceramidase	B7Z7G9_HUMAN	50Step_Domain_p100.0_to_150.0	100	150	50.0 AA STEP	50	1	0	1	0	0	0	0.02	0.007	1	0	SYFSEEGIGYNIIR SYFSEEGIGYNIIR		1	0	1	0	0	0
N/A	Glucosylceramidase	B7Z7G9_HUMAN	50Step_Domain_p250.0_to_300.0	250	300	50.0 AA STEP	50	1	0	1	0	0	0	0.02	0.007	1	0	VVLTDPEAAK VVLTDPEAAK		1	0	1	0	0	0
LPL	Lipoprotein lipase	LIPL_HUMAN	50Step_Domain_p0_to_50	0	50	50.0 AA STEP	50	0	0	0	1	0	1	-0.02	0.007	0	1		DFIDIESK DFIDIESK	0	0	0	1	0	2
N/A	Lipoprotein lipase	A8K2M5_HUMAN	50Step_Domain_p0_to_50	0	50	50.0 AA STEP	50	0	0	0	1	0	1	-0.02	0.007	0	1		DFIDIESK DFIDIESK	0	0	0	1	0	2
N/A	Lipoprotein lipase	Q53HW6_HUMAN	50Step_Domain_p0_to_50	0	50	50.0 AA STEP	50	0	0	0	1	0	1	-0.02	0.007	0	1		DFIDIESK DFIDIESK	0	0	0	1	0	2
N/A	Chordin	B7Z1H7_HUMAN	50Step_Domain_p250.0_to_300.0	250	300	50.0 AA STEP	50	2	3	1	1	0	0	0.04	0.0072	2	0	LQILHQGQLLR LQILHQGQLLR LQILHQGQLLR SGGLTQVPLR	SGGLTQVPLR	1	2	2	1	0	0
GNAS	Guanine nucleotide-binding protein G(s) subunit alpha isoforms short	GNAS2_HUMAN	50Step_Domain_p300.0_to_350.0	300	350	50.0 AA STEP	50	0	0	0	1	2	2	-0.04	0.0072	0	2		IEDYFPEFAR YTTPEDATPEPGEDPR YTTPEDATPEPGEDPR IEDYFPEFAR YTTPEDATPEPGEDPR	0	0	0	2	2	4
N/A	cDNA FLJ53647; highly similar to Four and a half LIM domains protein 1	B7Z5V0_HUMAN	50Step_Domain_p100.0_to_150.0	100	150	50.0 AA STEP	50	0	0	0	1	0	2	-0.02	0.0072	0	1		AIVAGDQNVEYK AIVAGDQNVEYK QVIGTGSFFPK	0	0	0	1	0	4
N/A	Four and a half LIM domains 1 variant	Q53FI7_HUMAN	50Step_Domain_p100.0_to_150.0	100	150	50.0 AA STEP	50	0	0	0	1	0	2	-0.02	0.0072	0	1		AIVAGDQNVEYK AIVAGDQNVEYK QVIGTGSFFPK	0	0	0	1	0	4
FHL1	Four and a half LIM domains protein 1	Q5JXI8_HUMAN	50Step_Domain_p100.0_to_150.0	100	150	50.0 AA STEP	50	0	0	0	1	0	2	-0.02	0.0072	0	1		AIVAGDQNVEYK AIVAGDQNVEYK QVIGTGSFFPK	0	0	0	1	0	4
ATP5F1A	ATP synthase subunit alpha; mitochondrial	ATPA_HUMAN	50Step_Domain_p50.0_to_100.0	50	100	50.0 AA STEP	50	0	0	0	2	0	1	-0.02	0.0072	0	1		ILGADTSVDLEETGR TGTAEMSSILEER VLSIGDGIAR ILGADTSVDLEETGR	0	0	0	4	0	2
HEL-S-123m	ATP synthase subunit alpha	V9HW26_HUMAN	50Step_Domain_p50.0_to_100.0	50	100	50.0 AA STEP	50	0	0	0	2	0	1	-0.02	0.0072	0	1		ILGADTSVDLEETGR TGTAEMSSILEER VLSIGDGIAR ILGADTSVDLEETGR	0	0	0	4	0	2
COL5A1	Collagen alpha-1(V) chain	CO5A1_HUMAN	50Step_Domain_p1650.0_to_1700.0	1650	1700	50.0 AA STEP	50	0	0	0	3	3	3	-0.06	0.0074	0	3		ENPGSWFSEFK ENPGSWFSEFK ENPGSWFSEFK	0	0	0	5	4	4
COL5A1	Collagen alpha-1(V) chain	CO5A1_HUMAN	50Step_Domain_p1750.0_to_1800.0	1750	1800	50.0 AA STEP	50	18	8	5	8	7	7	0.06	0.0074	10	7	FLGSNDEEMSYDNNPYIR TVLEIDTPK FLGSNDEEMSYDNNPYIR TVLEIDTPK FLGSNDEEMSYDNNPYIR	FLGSNDEEMSYDNNPYIR TVLEIDTPK FLGSNDEEMSYDNNPYIR TVLEIDTPK FLGSNDEEMSYDNNPYIR TVLEIDTPK	3	5	4	15	9	10
CHRD	Chordin	E7ESX1_HUMAN	80Step_Domain_p0_to_80	0	80	80.0 AA STEP	80	0	0	0	0	0	0	0	1	0	0			0	0	0	0	0	0
CHRD	Chordin	E7ESX1_HUMAN	80Step_Domain_p80.0_to_160.0	80	160	80.0 AA STEP	80	0	0	0	1	0	0	0	1	0	0		QPSGLSFEYPR	0	0	0	1	0	0
CHRD	Chordin	E7ESX1_HUMAN	80Step_Domain_p160.0_to_240.0	160	240	80.0 AA STEP	80	2	3	3	1	0	0	0.0375	0	3	0	GDGHTDFVALLTGPR GDGHTDFVALLTGPR GDGHTDFVALLTGPR	GDGHTDFVALLTGPR	1	2	4	1	0	0
CHRD	Chordin	E7ESX1_HUMAN	80Step_Domain_p240.0_to_320.0	240	320	80.0 AA STEP	80	0	0	0	0	0	0	0	1	0	0			0	0	0	0	0	0
CHRD	Chordin	E7ESX1_HUMAN	80Step_Domain_p320.0_to_400.0	320	400	80.0 AA STEP	80	2	3	1	1	0	0	0.025	0.024	2	0	LQILHQGQLLR LQILHQGQLLR LQILHQGQLLR SGGLTQVPLR	SGGLTQVPLR	1	2	2	1	0	0
CHRD	Chordin	E7ESX1_HUMAN	80Step_Domain_p400.0_to_480.0	400	480	80.0 AA STEP	80	0	0	0	0	0	0	0	1	0	0			0	0	0	0	0	0
CHRD	Chordin	E7ESX1_HUMAN	80Step_Domain_p480.0_to_560.0	480	560	80.0 AA STEP	80	0	0	1	0	0	2	-0.0125	1	0	1	DFPDGELR	DFPDGELR	0	0	1	0	0	1
CHRD	Chordin	E7ESX1_HUMAN	80Step_Domain_p560.0_to_640.0	560	640	80.0 AA STEP	80	2	1	3	1	5	2	-0.0125	1	2	3	DLEPELLR DLEPELLR DLEPELLR GFYGSEAQGVVK	DLEPELLR DLEPELLR DLEPELLR	1	1	4	1	2	1
CHRD	Chordin	E7ESX1_HUMAN	80Step_Domain_p640.0_to_720.0	640	720	80.0 AA STEP	80	0	0	0	2	2	2	-0.025	0.0036	0	2		LEAAGAEGVR LEAAGAEGVR LEAAGAEGVR	0	0	0	2	1	1
CHRD	Chordin	E7ESX1_HUMAN	80Step_Domain_p720.0_to_800.0	720	800	80.0 AA STEP	80	0	0	0	0	0	0	0	1	0	0			0	0	0	0	0	0
CHRD	Chordin	E7ESX1_HUMAN	80Step_Domain_p800.0_to_880.0	800	880	80.0 AA STEP	80	0	0	0	0	0	0	0	1	0	0			0	0	0	0	0	0
CHRD	Chordin	E7ESX1_HUMAN	80Step_Domain_p880.0_to_954.0	880	954	80.0 AA STEP	74	0	0	0	0	0	0	0	1	0	0			0	0	0	0	0	0
CHRD	Chordin	E7ESX1_HUMAN	100Step_Domain_p0_to_100	0	100	100.0 AA STEP	100	0	0	0	0	0	0	0	1	0	0			0	0	0	0	0	0
CHRD	Chordin	E7ESX1_HUMAN	100Step_Domain_p100.0_to_200.0	100	200	100.0 AA STEP	100	2	3	3	2	0	0	0.02	0.004	3	1	GDGHTDFVALLTGPR GDGHTDFVALLTGPR GDGHTDFVALLTGPR	GDGHTDFVALLTGPR QPSGLSFEYPR	1	2	4	2	0	0
CHRD	Chordin	E7ESX1_HUMAN	100Step_Domain_p200.0_to_300.0	200	300	100.0 AA STEP	100	0	0	0	0	0	0	0	1	0	0			0	0	0	0	0	0
CHRD	Chordin	E7ESX1_HUMAN	100Step_Domain_p300.0_to_400.0	300	400	100.0 AA STEP	100	2	3	1	1	0	0	0.02	0.025	2	0	LQILHQGQLLR LQILHQGQLLR LQILHQGQLLR SGGLTQVPLR	SGGLTQVPLR	1	2	2	1	0	0
CHRD	Chordin	E7ESX1_HUMAN	100Step_Domain_p400.0_to_500.0	400	500	100.0 AA STEP	100	0	0	0	0	0	0	0	1	0	0			0	0	0	0	0	0
CHRD	Chordin	E7ESX1_HUMAN	100Step_Domain_p500.0_to_600.0	500	600	100.0 AA STEP	100	0	0	1	0	0	2	-0.01	1	0	1	DFPDGELR	DFPDGELR	0	0	1	0	0	1
CHRD	Chordin	E7ESX1_HUMAN	100Step_Domain_p600.0_to_700.0	600	700	100.0 AA STEP	100	2	1	3	4	7	5	-0.03	0	2	5	DLEPELLR DLEPELLR DLEPELLR GFYGSEAQGVVK	DLEPELLR LEAAGAEGVR DLEPELLR LEAAGAEGVR DLEPELLR LEAAGAEGVR	1	1	4	3	3	2
CHRD	Chordin	E7ESX1_HUMAN	100Step_Domain_p700.0_to_800.0	700	800	100.0 AA STEP	100	0	0	0	0	0	0	0	1	0	0			0	0	0	0	0	0
CHRD	Chordin	E7ESX1_HUMAN	100Step_Domain_p800.0_to_900.0	800	900	100.0 AA STEP	100	0	0	0	0	0	0	0	1	0	0			0	0	0	0	0	0
CHRD	Chordin	E7ESX1_HUMAN	100Step_Domain_p900.0_to_954.0	900	954	100.0 AA STEP	54	0	0	0	0	0	0	0	1	0	0			0	0	0	0	0	0
CHRD	Chordin	CHRD_HUMAN	VWFC 1	49	126	DOMAINS	77	0	0	0	0	0	0	0	1	0	0			0	0	0	0	0	0
CHRD	Chordin	CHRD_HUMAN	CHRD 1	168	277	DOMAINS	109	2	3	3	1	0	0	0.0275229	0.0048	3	0	GDGHTDFVALLTGPR GDGHTDFVALLTGPR GDGHTDFVALLTGPR	GDGHTDFVALLTGPR	1	2	4	1	0	0
CHRD	Chordin	CHRD_HUMAN	CHRD 2	279	402	DOMAINS	123	2	3	1	1	0	0	0.0162602	0.0832	2	0	LQILHQGQLLR LQILHQGQLLR LQILHQGQLLR SGGLTQVPLR	SGGLTQVPLR	1	2	2	1	0	0
CHRD	Chordin	CHRD_HUMAN	CHRD 3	403	524	DOMAINS	121	0	0	1	0	0	2	-0.00826446	1	0	1	DFPDGELR	DFPDGELR	0	0	1	0	0	1
CHRD	Chordin	CHRD_HUMAN	CHRD 4	530	650	DOMAINS	120	2	1	3	1	5	2	-0.00833333	1	2	3	DLEPELLR DLEPELLR DLEPELLR GFYGSEAQGVVK	DLEPELLR DLEPELLR DLEPELLR	1	1	4	1	2	1
CHRD	Chordin	CHRD_HUMAN	VWFC 2	703	763	DOMAINS	60	0	0	0	0	0	0	0	1	0	0			0	0	0	0	0	0
CHRD	Chordin	CHRD_HUMAN	VWFC 3	784	850	DOMAINS	66	0	0	0	0	0	0	0	1	0	0			0	0	0	0	0	0
CHRD	Chordin	CHRD_HUMAN	VWFC 4	872	932	DOMAINS	60	0	0	0	0	0	0	0	1	0	0			0	0	0	0	0	0
LTBP2	Latent-transforming growth factor beta-binding protein 2	LTBP2_HUMAN	50Step_Domain_p50.0_to_100.0	50	100	50.0 AA STEP	50	2	2	3	4	6	3	-0.04	0.0074	2	4	EQDAPVAGLQPVER EQDAPVAGLQPVER EQDAPVAGLQPVER	AQPGWGSPR EQDAPVAGLQPVER AQPGWGSPR EQDAPVAGLQPVER EQDAPVAGLQPVER	1	1	4	4	7	4
APOC1	Apolipoprotein C-I	APOC1_HUMAN	50Step_Domain_p0_to_50	0	50	50.0 AA STEP	50	2	1	1	0	0	0	0.02	0.0078	1	0	EFGNTLEDK EFGNTLEDK EFGNTLEDK		4	1	1	0	0	0
A1BG	Alpha-1B-glycoprotein	A1BG_HUMAN	50Step_Domain_p400.0_to_450.0	400	450	50.0 AA STEP	50	3	4	0	0	0	0	0.04	0.008	2	0	ATWSGAVLAGR TPGAAANLELIFVGPQHAGNYR ATWSGAVLAGR TPGAAANLELIFVGPQHAGNYR		6	7	0	0	0	0
HEL-S-163pA	Epididymis secretory sperm binding protein Li 163pA	V9HWD8_HUMAN	50Step_Domain_p400.0_to_450.0	400	450	50.0 AA STEP	50	3	4	0	0	0	0	0.04	0.008	2	0	ATWSGAVLAGR TPGAAANLELIFVGPQHAGNYR ATWSGAVLAGR TPGAAANLELIFVGPQHAGNYR		6	7	0	0	0	0
HPX	Hemopexin	HEMO_HUMAN	50Step_Domain_p250.0_to_300.0	250	300	50.0 AA STEP	50	20	14	0	0	0	0	0.22	0.008	11	0	DGWHSWPIAHQWPQGPSAVDAAFSWEEK DGWHSWPIAHQWPQGPSAVDAAFSWEEK		39	16	0	0	0	0
PAM	Peptidyl-glycine alpha-amidating monooxygenase	AMD_HUMAN	50Step_Domain_p50.0_to_100.0	50	100	50.0 AA STEP	50	0	2	3	0	1	0	0.04	0.008	2	0	IPVDEEAFVIDFKPR IPVDEEAFVIDFKPR	IPVDEEAFVIDFKPR	0	2	5	0	1	0
MYH9	Myosin-9	MYH9_HUMAN	50Step_Domain_p1850.0_to_1900.0	1850	1900	50.0 AA STEP	50	0	0	0	1	0	1	-0.02	0.008	0	1		ELEDATETADAMNR ELEDATETADAMNR RQLEEAEEEAQR	0	0	0	1	0	2
MYH9	Myosin-9	MYH9_HUMAN	50Step_Domain_p1900.0_to_1950.0	1900	1950	50.0 AA STEP	50	0	0	0	1	0	1	-0.02	0.008	0	1		ELEDATETADAMNR ELEDATETADAMNR	0	0	0	1	0	1
INHBA	Inhibin beta A chain	INHBA_HUMAN	50Step_Domain_p200.0_to_250.0	200	250	50.0 AA STEP	50	1	1	1	4	6	3	-0.06	0.0081	1	4	SELLLSEK SELLLSEK SELLLSEK	SELLLSEK STWHVFPVSSSIQR SELLLSEK SELLLSEK	1	1	2	2	2	2
N/A	Activin beta-A chain	Q53H39_HUMAN	50Step_Domain_p200.0_to_250.0	200	250	50.0 AA STEP	50	1	1	1	4	6	3	-0.06	0.0081	1	4	SELLLSEK SELLLSEK SELLLSEK	SELLLSEK STWHVFPVSSSIQR SELLLSEK SELLLSEK	1	1	2	2	2	2
LMNA	Prelamin-A/C	LMNA_HUMAN	50Step_Domain_p400.0_to_450.0	400	450	50.0 AA STEP	50	2	4	4	0	0	1	0.06	0.0084	3	0	VAVEEVDEEGK VAVEEVDEEGK VAVEEVDEEGK	VAVEEVDEEGK VAVEEVDEEGKFVR	1	1	2	0	0	2
MSN	Moesin	MOES_HUMAN	50Step_Domain_p50.0_to_100.0	50	100	50.0 AA STEP	50	1	4	5	1	0	1	0.04	0.0084	3	1	FYPEDVSEELIQDITQR EVWFFGLQYQDTK FYPEDVSEELIQDITQR EVWFFGLQYQDTK FYPEDVSEELIQDITQR	FYPEDVSEELIQDITQR FYPEDVSEELIQDITQR	1	2	6	1	0	2
HEL70	Epididymis luminal protein 70	V9HWC0_HUMAN	50Step_Domain_p50.0_to_100.0	50	100	50.0 AA STEP	50	1	4	5	1	0	1	0.04	0.0084	3	1	FYPEDVSEELIQDITQR EVWFFGLQYQDTK FYPEDVSEELIQDITQR EVWFFGLQYQDTK FYPEDVSEELIQDITQR	FYPEDVSEELIQDITQR FYPEDVSEELIQDITQR	1	2	6	1	0	2
N/A	cDNA FLJ90112 fis; clone HEMBA1006707; highly similar to Matrilin-4	B3KQB2_HUMAN	50Step_Domain_p450.0_to_500.0	450	500	50.0 AA STEP	50	0	2	2	4	2	4	-0.04	0.0084	1	3	EEGIVMYAVGVGK SQDDISVWAAR VGLVFTDGR EEGIVMYAVGVGK SQDDISVWAAR VGLVFTDGR	SQDDISVWAAR VGLVFTDGR SQDDISVWAAR VGLVFTDGR EEGIVMYAVGVGK SQDDISVWAAR VGLVFTDGR	0	4	4	4	4	8
GPLD1	Phosphatidylinositol-glycan-specific phospholipase D	PHLD_HUMAN	50Step_Domain_p400.0_to_450.0	400	450	50.0 AA STEP	50	1	1	0	0	0	0	0.02	0.0085	1	0	ILEGFQPSGR ILEGFQPSGR		1	1	0	0	0	0
GPLD1	Phosphatidylinositol-glycan-specific phospholipase D	PHLD_HUMAN	50Step_Domain_p700.0_to_750.0	700	750	50.0 AA STEP	50	1	1	0	0	0	0	0.02	0.0085	1	0	IADVTSGLIGGEDGR IADVTSGLIGGEDGR		1	1	0	0	0	0
GPLD1	Phosphatidylinositol-glycan-specific phospholipase D	PHLD_HUMAN	50Step_Domain_p750.0_to_800.0	750	800	50.0 AA STEP	50	1	1	0	0	0	0	0.02	0.0085	1	0	IADVTSGLIGGEDGR AQYVLISPEASSR IADVTSGLIGGEDGR		1	2	0	0	0	0
HSPG2	Heparan sulfate proteoglycan 2 (Perlecan); isoform CRA_b	A0A024RAB6_HUMAN	50Step_Domain_p150.0_to_200.0	150	200	50.0 AA STEP	50	0	1	0	5	5	3	-0.08	0.0087	0	4	LGTVPQFPR	LGTVPQFPR LGTVPQFPR LGTVPQFPR	0	1	0	5	5	4
PRELP	Prolargin	PRELP_HUMAN	50Step_Domain_p250.0_to_300.0	250	300	50.0 AA STEP	50	54	36	33	46	69	84	-0.5	0.0088	41	66	IETIPNGYFK SFPNLAFIR VPTAIHQLYLDSNK IETIPNGYFK SFPNLAFIR VPTAIHQLYLDSNK IETIPNGYFK SFPNLAFIR VPTAIHQLYLDSNK	IETIPNGYFK LNYNKLTDR SFPNLAFIR VPTAIHQLYLDSNK IETIPNGYFK SFPNLAFIR VPTAIHQLYLDSNK IETIPNGYFK SFPNLAFIR VPTAIHQLYLDSNK	42	27	29	54	86	99
N/A	Uncharacterized protein	Q8WVW5_HUMAN	50Step_Domain_p150.0_to_200.0	150	200	50.0 AA STEP	50	5	9	11	2	3	1	0.12	0.0088	8	2	GYSFTTTAER GYSFTTTAER TTGIVMDSGDGVTHTVPIYEGYALPHAILR GYSFTTTAER TTGIVMDSGDGVTHTVPIYEGYALPHAILR	GYSFTTTAER GYSFTTTAER GYSFTTTAER	3	12	8	1	2	2
CHRD	Chordin	CHRD_HUMAN	80Step_Domain_p0_to_80	0	80	80.0 AA STEP	80	0	0	0	0	0	0	0	1	0	0			0	0	0	0	0	0
CHRD	Chordin	CHRD_HUMAN	80Step_Domain_p80.0_to_160.0	80	160	80.0 AA STEP	80	0	0	0	1	0	0	0	1	0	0		QPSGLSFEYPR	0	0	0	1	0	0
CHRD	Chordin	CHRD_HUMAN	80Step_Domain_p160.0_to_240.0	160	240	80.0 AA STEP	80	2	3	3	1	0	0	0.0375	0	3	0	GDGHTDFVALLTGPR GDGHTDFVALLTGPR GDGHTDFVALLTGPR	GDGHTDFVALLTGPR	1	2	4	1	0	0
CHRD	Chordin	CHRD_HUMAN	80Step_Domain_p240.0_to_320.0	240	320	80.0 AA STEP	80	0	0	0	0	0	0	0	1	0	0			0	0	0	0	0	0
CHRD	Chordin	CHRD_HUMAN	80Step_Domain_p320.0_to_400.0	320	400	80.0 AA STEP	80	2	3	1	1	0	0	0.025	0.024	2	0	LQILHQGQLLR LQILHQGQLLR LQILHQGQLLR SGGLTQVPLR	SGGLTQVPLR	1	2	2	1	0	0
CHRD	Chordin	CHRD_HUMAN	80Step_Domain_p400.0_to_480.0	400	480	80.0 AA STEP	80	0	0	0	0	0	0	0	1	0	0			0	0	0	0	0	0
CHRD	Chordin	CHRD_HUMAN	80Step_Domain_p480.0_to_560.0	480	560	80.0 AA STEP	80	0	0	1	0	0	2	-0.0125	1	0	1	DFPDGELR	DFPDGELR	0	0	1	0	0	1
CHRD	Chordin	CHRD_HUMAN	80Step_Domain_p560.0_to_640.0	560	640	80.0 AA STEP	80	2	1	3	1	5	2	-0.0125	1	2	3	DLEPELLR DLEPELLR DLEPELLR GFYGSEAQGVVK	DLEPELLR DLEPELLR DLEPELLR	1	1	4	1	2	1
CHRD	Chordin	CHRD_HUMAN	80Step_Domain_p640.0_to_720.0	640	720	80.0 AA STEP	80	0	0	0	2	2	2	-0.025	0.0036	0	2		LEAAGAEGVR LEAAGAEGVR LEAAGAEGVR	0	0	0	2	1	1
CHRD	Chordin	CHRD_HUMAN	80Step_Domain_p720.0_to_800.0	720	800	80.0 AA STEP	80	0	0	0	0	0	0	0	1	0	0			0	0	0	0	0	0
CHRD	Chordin	CHRD_HUMAN	80Step_Domain_p800.0_to_880.0	800	880	80.0 AA STEP	80	0	0	0	0	0	0	0	1	0	0			0	0	0	0	0	0
CHRD	Chordin	CHRD_HUMAN	80Step_Domain_p880.0_to_955.0	880	955	80.0 AA STEP	75	0	0	0	0	0	0	0	1	0	0			0	0	0	0	0	0
CHRD	Chordin	CHRD_HUMAN	100Step_Domain_p0_to_100	0	100	100.0 AA STEP	100	0	0	0	0	0	0	0	1	0	0			0	0	0	0	0	0
CHRD	Chordin	CHRD_HUMAN	100Step_Domain_p100.0_to_200.0	100	200	100.0 AA STEP	100	2	3	3	2	0	0	0.02	0.004	3	1	GDGHTDFVALLTGPR GDGHTDFVALLTGPR GDGHTDFVALLTGPR	GDGHTDFVALLTGPR QPSGLSFEYPR	1	2	4	2	0	0
CHRD	Chordin	CHRD_HUMAN	100Step_Domain_p200.0_to_300.0	200	300	100.0 AA STEP	100	0	0	0	0	0	0	0	1	0	0			0	0	0	0	0	0
CHRD	Chordin	CHRD_HUMAN	100Step_Domain_p300.0_to_400.0	300	400	100.0 AA STEP	100	2	3	1	1	0	0	0.02	0.025	2	0	LQILHQGQLLR LQILHQGQLLR LQILHQGQLLR SGGLTQVPLR	SGGLTQVPLR	1	2	2	1	0	0
CHRD	Chordin	CHRD_HUMAN	100Step_Domain_p400.0_to_500.0	400	500	100.0 AA STEP	100	0	0	0	0	0	0	0	1	0	0			0	0	0	0	0	0
CHRD	Chordin	CHRD_HUMAN	100Step_Domain_p500.0_to_600.0	500	600	100.0 AA STEP	100	0	0	1	0	0	2	-0.01	1	0	1	DFPDGELR	DFPDGELR	0	0	1	0	0	1
CHRD	Chordin	CHRD_HUMAN	100Step_Domain_p600.0_to_700.0	600	700	100.0 AA STEP	100	2	1	3	4	7	5	-0.03	0	2	5	DLEPELLR DLEPELLR DLEPELLR GFYGSEAQGVVK	DLEPELLR LEAAGAEGVR DLEPELLR LEAAGAEGVR DLEPELLR LEAAGAEGVR	1	1	4	3	3	2
CHRD	Chordin	CHRD_HUMAN	100Step_Domain_p700.0_to_800.0	700	800	100.0 AA STEP	100	0	0	0	0	0	0	0	1	0	0			0	0	0	0	0	0
CHRD	Chordin	CHRD_HUMAN	100Step_Domain_p800.0_to_900.0	800	900	100.0 AA STEP	100	0	0	0	0	0	0	0	1	0	0			0	0	0	0	0	0
CHRD	Chordin	CHRD_HUMAN	100Step_Domain_p900.0_to_955.0	900	955	100.0 AA STEP	55	0	0	0	0	0	0	0	1	0	0			0	0	0	0	0	0
SERPIND1	Heparin cofactor 2	HEP2_HUMAN	1	73	83	REPEAT	10	0	0	0	0	0	0	0	1	0	0			0	0	0	0	0	0
SERPIND1	Heparin cofactor 2	HEP2_HUMAN	2	87	97	REPEAT	10	0	0	0	0	0	0	0	1	0	0			0	0	0	0	0	0
SERPIND1	Heparin cofactor 2	HEP2_HUMAN	Chemotactic activity	68	79	REGIONS	11	0	0	0	0	0	0	0	1	0	0			0	0	0	0	0	0
SERPIND1	Heparin cofactor 2	HEP2_HUMAN	Glycosaminoglycan-binding site	192	212	REGIONS	20	3	4	0	0	0	0	0.1	0.0504	2	0	YEITTIHNLFR YEITTIHNLFR		5	7	0	0	0	0
SDK2	Protein sidekick-2	SDK2_HUMAN	50Step_Domain_p1250.0_to_1300.0	1250	1300	50.0 AA STEP	50	0	0	0	0	0	1	0	0.0088	0	0		TLDDVPGPPMGILFPEVR	0	0	0	0	0	1
SDK2	Protein sidekick-2	SDK2_HUMAN	50Step_Domain_p1300.0_to_1350.0	1300	1350	50.0 AA STEP	50	0	0	0	0	0	1	0	0.0088	0	0		TLDDVPGPPMGILFPEVR	0	0	0	0	0	1
SDK2	Protein sidekick-2	SDK2_HUMAN	50Step_Domain_p1750.0_to_1800.0	1750	1800	50.0 AA STEP	50	0	0	0	0	0	1	0	0.0088	0	0		DLAEGVTYR	0	0	0	0	0	1
KNG1	Kininogen 1; isoform CRA_a	D3DNU8_HUMAN	50Step_Domain_p150.0_to_200.0	150	200	50.0 AA STEP	50	2	2	11	0	0	0	0.1	0.009	5	0	ITYSIVQTNCSK QVVAGLNFR QVVAGLNFR QVVAGLNFR		4	3	2	0	0	0
GPX3	Glutathione peroxidase 3	GPX3_HUMAN	50Step_Domain_p150.0_to_200.0	150	200	50.0 AA STEP	50	3	2	4	2	0	1	0.04	0.009	3	1	FLVGPDGIPIMR NSCPPTSELLGTSDR FLVGPDGIPIMR FLVGPDGIPIMR NSCPPTSELLGTSDR	FLVGPDGIPIMR FLVGPDGIPIMR	5	4	4	1	0	1
PXDN	Peroxidasin homolog	PXDN_HUMAN	50Step_Domain_p900.0_to_950.0	900	950	50.0 AA STEP	50	1	2	2	0	0	1	0.04	0.009	2	0	EQINQLTSYIDASNVYGSTEHEAR EQINQLTSYIDASNVYGSTEHEAR EQINQLTSYIDASNVYGSTEHEAR	EQINQLTSYIDASNVYGSTEHEAR	1	1	3	0	0	1
FGA	Fibrinogen alpha chain	FIBA_HUMAN	50Step_Domain_p50.0_to_100.0	50	100	50.0 AA STEP	50	7	13	57	0	0	0	0.52	0.009	26	0	DSDWPFCSDEDWNYK GLIDEVNQDFTNR NSLFEYQK GLIDEVNQDFTNR NSLFEYQK GLIDEVNQDFTNR		14	8	1	0	0	0
ANXA2	Annexin A2	ANXA2_HUMAN	50Step_Domain_p150.0_to_200.0	150	200	50.0 AA STEP	50	17	16	14	22	18	24	-0.1	0.0091	16	21	AEDGSVIDYELIDQDAR DIISDTSGDFR RAEDGSVIDYELIDQDAR TDLEKDIISDTSGDFR AEDGSVIDYELIDQDAR DIISDTSGDFR DIISDTSGDFRK DLYDAGVK RAEDGSVIDYELIDQDAR TDLEKDIISDTSGDFR AEDGSVIDYELIDQDAR DLYDAGVK RAEDGSVIDYELIDQDAR TDLEKDIISDTSGDFR	AEDGSVIDYELIDQDAR DIISDTSGDFR DIISDTSGDFRK DLYDAGVK RAEDGSVIDYELIDQDAR AEDGSVIDYELIDQDAR DIISDTSGDFR DIISDTSGDFRK RAEDGSVIDYELIDQDAR AEDGSVIDYELIDQDAR DIISDTSGDFR DIISDTSGDFRK DLYDAGVK RAEDGSVIDYELIDQDAR TDLEKDIISDTSGDFR	8	9	11	23	14	36
HEL-S-270	Annexin	V9HW65_HUMAN	50Step_Domain_p150.0_to_200.0	150	200	50.0 AA STEP	50	17	16	14	22	18	24	-0.1	0.0091	16	21	AEDGSVIDYELIDQDAR DIISDTSGDFR RAEDGSVIDYELIDQDAR TDLEKDIISDTSGDFR AEDGSVIDYELIDQDAR DIISDTSGDFR DIISDTSGDFRK DLYDAGVK RAEDGSVIDYELIDQDAR TDLEKDIISDTSGDFR AEDGSVIDYELIDQDAR DLYDAGVK RAEDGSVIDYELIDQDAR TDLEKDIISDTSGDFR	AEDGSVIDYELIDQDAR DIISDTSGDFR DIISDTSGDFRK DLYDAGVK RAEDGSVIDYELIDQDAR AEDGSVIDYELIDQDAR DIISDTSGDFR DIISDTSGDFRK RAEDGSVIDYELIDQDAR AEDGSVIDYELIDQDAR DIISDTSGDFR DIISDTSGDFRK DLYDAGVK RAEDGSVIDYELIDQDAR TDLEKDIISDTSGDFR	8	9	11	23	14	36
LRP1	Prolow-density lipoprotein receptor-related protein 1	LRP1_HUMAN	50Step_Domain_p3000.0_to_3050.0	3000	3050	50.0 AA STEP	50	3	0	1	0	0	0	0.02	0.0091	1	0	AVTDEEPFLIFANR AVTDEEPFLIFANR		2	0	1	0	0	0
SERPIND1	Heparin cofactor 2	HEP2_HUMAN	80Step_Domain_p0_to_80	0	80	80.0 AA STEP	80	3	0	0	0	0	0	0.0125	1	1	0	GGETAQSADPQWEQLNNK GPLDQLEK		6	0	0	0	0	0
SERPIND1	Heparin cofactor 2	HEP2_HUMAN	80Step_Domain_p80.0_to_160.0	80	160	80.0 AA STEP	80	0	1	0	0	0	0	0	1	0	0	DQVNTFDNIFIAPVGISTAMGMISLGLK		0	1	0	0	0	0
SERPIND1	Heparin cofactor 2	HEP2_HUMAN	80Step_Domain_p160.0_to_240.0	160	240	80.0 AA STEP	80	4	8	0	0	0	0	0.05	0.0049	4	0	QFPILLDFK SVNDLYIQK YEITTIHNLFR DQVNTFDNIFIAPVGISTAMGMISLGLK GETHEQVHSILHFK QFPILLDFK SVNDLYIQK YEITTIHNLFR		8	16	0	0	0	0
SERPIND1	Heparin cofactor 2	HEP2_HUMAN	80Step_Domain_p240.0_to_320.0	240	320	80.0 AA STEP	80	3	2	0	0	0	0	0.025	0.8575	2	0	EYYFAEAQIADFSDPAFISK EYYFAEAQIADFSDPAFISK		5	4	0	0	0	0
SERPIND1	Heparin cofactor 2	HEP2_HUMAN	80Step_Domain_p320.0_to_400.0	320	400	80.0 AA STEP	80	1	1	0	0	0	0	0.0125	1	1	0	TLEAQLTPR TLEAQLTPR		2	1	0	0	0	0
SERPIND1	Heparin cofactor 2	HEP2_HUMAN	80Step_Domain_p400.0_to_480.0	400	480	80.0 AA STEP	80	1	2	0	0	0	0	0.0125	1	1	0	NYNLVESLK HQGTITVNEEGTQATTVTTVGFMPLSTQVR NYNLVESLK		2	3	0	0	0	0
SERPIND1	Heparin cofactor 2	HEP2_HUMAN	80Step_Domain_p480.0_to_499.0	480	499	80.0 AA STEP	19	0	0	0	0	0	0	0	1	0	0			0	0	0	0	0	0
SERPIND1	Heparin cofactor 2	HEP2_HUMAN	100Step_Domain_p0_to_100	0	100	100.0 AA STEP	100	3	0	0	0	0	0	0.01	1	1	0	GGETAQSADPQWEQLNNK GPLDQLEK		6	0	0	0	0	0
SERPIND1	Heparin cofactor 2	HEP2_HUMAN	100Step_Domain_p100.0_to_200.0	100	200	100.0 AA STEP	100	3	5	0	0	0	0	0.03	0.4365	3	0	YEITTIHNLFR DQVNTFDNIFIAPVGISTAMGMISLGLK GETHEQVHSILHFK YEITTIHNLFR		5	9	0	0	0	0
SERPIND1	Heparin cofactor 2	HEP2_HUMAN	100Step_Domain_p200.0_to_300.0	200	300	100.0 AA STEP	100	7	9	0	0	0	0	0.05	0.009	5	0	EYYFAEAQIADFSDPAFISK QFPILLDFK SVNDLYIQK YEITTIHNLFR EYYFAEAQIADFSDPAFISK QFPILLDFK SVNDLYIQK YEITTIHNLFR		13	18	0	0	0	0
SERPIND1	Heparin cofactor 2	HEP2_HUMAN	100Step_Domain_p300.0_to_400.0	300	400	100.0 AA STEP	100	1	1	0	0	0	0	0.01	1	1	0	TLEAQLTPR TLEAQLTPR		2	1	0	0	0	0
SERPIND1	Heparin cofactor 2	HEP2_HUMAN	100Step_Domain_p400.0_to_499.0	400	499	100.0 AA STEP	99	1	2	0	0	0	0	0.010101	1	1	0	NYNLVESLK HQGTITVNEEGTQATTVTTVGFMPLSTQVR NYNLVESLK		2	3	0	0	0	0
N/A	cDNA FLJ51929; highly similar to Plastin-3	B4DPW9_HUMAN	50Step_Domain_p200.0_to_250.0	200	250	50.0 AA STEP	50	1	0	0	0	0	0	0	0.0091	0	0	DGETLEELMK NEALAALLR		2	0	0	0	0	0
MATN4	Matrilin-4	MATN4_HUMAN	50Step_Domain_p500.0_to_550.0	500	550	50.0 AA STEP	50	0	2	2	4	2	4	-0.04	0.0091	1	3	EEGIVMYAVGVGK SQDDISVWAAR VGLVFTDGR EEGIVMYAVGVGK SQDDISVWAAR VGLVFTDGR	SQDDISVWAAR VGLVFTDGR SQDDISVWAAR VGLVFTDGR EEGIVMYAVGVGK SQDDISVWAAR VGLVFTDGR	0	4	4	4	4	8
N/A	Nucleolin	Q6ZS99_HUMAN	50Step_Domain_p300.0_to_350.0	300	350	50.0 AA STEP	50	0	0	0	1	0	1	-0.02	0.0091	0	1		EVFEDAAEIR EVFEDAAEIR	0	0	0	1	0	1
APOB	Apolipoprotein B (Including Ag(X) antigen)	C0JYY2_HUMAN	50Step_Domain_p3950.0_to_4000.0	3950	4000	50.0 AA STEP	50	7	4	0	0	0	0	0.08	0.0092	4	0	DFSAEYEEDGK DFSAEYEEDGKYEGLQEWEGK GISTSAASPAVGTVGMDMDEDDDFSK SPAFTDLHLR YEGLQEWEGK DFSAEYEEDGK SPAFTDLHLR		13	4	0	0	0	0
APOL1	Apolipoprotein L1	APOL1_HUMAN	50Step_Domain_p300.0_to_350.0	300	350	50.0 AA STEP	50	4	3	0	0	0	0	0.04	0.0096	2	0	VNEPSILEMSR VTEPISAESGEQVER VNEPSILEMSR VTEPISAESGEQVER		7	2	0	0	0	0
ACTB	Actin; cytoplasmic 1	ACTB_HUMAN	50Step_Domain_p150.0_to_200.0	150	200	50.0 AA STEP	50	5	9	11	2	3	1	0.12	0.0096	8	2	GYSFTTTAER GYSFTTTAER TTGIVMDSGDGVTHTVPIYEGYALPHAILR GYSFTTTAER TTGIVMDSGDGVTHTVPIYEGYALPHAILR	GYSFTTTAER GYSFTTTAER GYSFTTTAER	3	12	8	1	2	2
ACTG1	Actin; cytoplasmic 2	ACTG_HUMAN	50Step_Domain_p150.0_to_200.0	150	200	50.0 AA STEP	50	5	9	11	2	3	1	0.12	0.0096	8	2	GYSFTTTAER GYSFTTTAER TTGIVMDSGDGVTHTVPIYEGYALPHAILR GYSFTTTAER TTGIVMDSGDGVTHTVPIYEGYALPHAILR	GYSFTTTAER GYSFTTTAER GYSFTTTAER	3	12	8	1	2	2
PS1TP5BP1	HCG15971; isoform CRA_a	Q1KLZ0_HUMAN	50Step_Domain_p150.0_to_200.0	150	200	50.0 AA STEP	50	5	9	11	2	3	1	0.12	0.0096	8	2	GYSFTTTAER GYSFTTTAER TTGIVMDSGDGVTHTVPIYEGYALPHAILR GYSFTTTAER TTGIVMDSGDGVTHTVPIYEGYALPHAILR	GYSFTTTAER GYSFTTTAER GYSFTTTAER	3	12	8	1	2	2
N/A	Beta actin variant	Q53G76_HUMAN	50Step_Domain_p150.0_to_200.0	150	200	50.0 AA STEP	50	5	9	11	2	3	1	0.12	0.0096	8	2	GYSFTTTAER GYSFTTTAER TTGIVMDSGDGVTHTVPIYEGYALPHAILR GYSFTTTAER TTGIVMDSGDGVTHTVPIYEGYALPHAILR	GYSFTTTAER GYSFTTTAER GYSFTTTAER	3	12	8	1	2	2
SERPINA7	Thyroxine-binding globulin	THBG_HUMAN	80Step_Domain_p0_to_80	0	80	80.0 AA STEP	80	1	0	0	0	0	0	0	1	0	0	FTVETPDK		1	0	0	0	0	0
SERPINA7	Thyroxine-binding globulin	THBG_HUMAN	80Step_Domain_p80.0_to_160.0	80	160	80.0 AA STEP	80	0	0	0	0	0	0	0	1	0	0			0	0	0	0	0	0
SERPINA7	Thyroxine-binding globulin	THBG_HUMAN	80Step_Domain_p160.0_to_240.0	160	240	80.0 AA STEP	80	3	3	0	0	0	0	0.025	0.0054	2	0	AQWANPFDPSK QEINSHVEMQTK TEDSSSFLIDK AQWANPFDPSK TEDSSSFLIDK		6	4	0	0	0	0
SERPINA7	Thyroxine-binding globulin	THBG_HUMAN	80Step_Domain_p240.0_to_320.0	240	320	80.0 AA STEP	80	2	2	0	0	0	0	0.0125	0.1104	1	0	EGQMESVEAAMSSK FSISATYDLGATLLK NALALFVLPK EGQMESVEAAMSSK FSISATYDLGATLLK NALALFVLPK		3	3	0	0	0	0
SERPINA7	Thyroxine-binding globulin	THBG_HUMAN	80Step_Domain_p320.0_to_400.0	320	400	80.0 AA STEP	80	1	1	0	0	0	0	0.0125	1	1	0	FSISATYDLGATLLK GTEAAAVPEVELSDQPENTFLHPIIQIDR FSISATYDLGATLLK		2	1	0	0	0	0
SERPINA7	Thyroxine-binding globulin	THBG_HUMAN	80Step_Domain_p400.0_to_415.0	400	415	80.0 AA STEP	15	0	0	0	0	0	0	0	1	0	0			0	0	0	0	0	0
SERPINA7	Thyroxine-binding globulin	THBG_HUMAN	100Step_Domain_p0_to_100	0	100	100.0 AA STEP	100	1	0	0	0	0	0	0	1	0	0	FTVETPDK		1	0	0	0	0	0
SERPINA7	Thyroxine-binding globulin	THBG_HUMAN	100Step_Domain_p100.0_to_200.0	100	200	100.0 AA STEP	100	1	0	0	0	0	0	0	1	0	0	QEINSHVEMQTK		1	0	0	0	0	0
SERPINA7	Thyroxine-binding globulin	THBG_HUMAN	100Step_Domain_p200.0_to_300.0	200	300	100.0 AA STEP	100	4	5	0	0	0	0	0.03	0.0025	3	0	AQWANPFDPSK EGQMESVEAAMSSK NALALFVLPK TEDSSSFLIDK AQWANPFDPSK EGQMESVEAAMSSK NALALFVLPK TEDSSSFLIDK		7	6	0	0	0	0
SERPINA7	Thyroxine-binding globulin	THBG_HUMAN	100Step_Domain_p300.0_to_400.0	300	400	100.0 AA STEP	100	1	1	0	0	0	0	0.01	1	1	0	FSISATYDLGATLLK GTEAAAVPEVELSDQPENTFLHPIIQIDR FSISATYDLGATLLK		2	1	0	0	0	0
SERPINA7	Thyroxine-binding globulin	THBG_HUMAN	100Step_Domain_p400.0_to_415.0	400	415	100.0 AA STEP	15	0	0	0	0	0	0	0	1	0	0			0	0	0	0	0	0
N/A	Beta actin variant	Q53GK6_HUMAN	50Step_Domain_p150.0_to_200.0	150	200	50.0 AA STEP	50	5	9	11	2	3	1	0.12	0.0096	8	2	GYSFTTTAER GYSFTTTAER TTGIVMDSGDGVTHTVPIYEGYALPHAILR GYSFTTTAER TTGIVMDSGDGVTHTVPIYEGYALPHAILR	GYSFTTTAER GYSFTTTAER GYSFTTTAER	3	12	8	1	2	2
N/A	Transaldolase	A0A140VK56_HUMAN	50Step_Domain_p100.0_to_150.0	100	150	50.0 AA STEP	50	0	0	0	1	1	1	-0.02	0.0098	0	1		VSTEVDAR VSTEVDAR LSSTWEGIQAGK	0	0	0	1	1	1
TALDO1	Transaldolase	TALDO_HUMAN	50Step_Domain_p100.0_to_150.0	100	150	50.0 AA STEP	50	0	0	0	1	1	1	-0.02	0.0098	0	1		VSTEVDAR VSTEVDAR LSSTWEGIQAGK	0	0	0	1	1	1
N/A	cDNA FLJ61564; highly similar to Plexin domain-containing protein 2	B4E367_HUMAN	50Step_Domain_p150.0_to_200.0	150	200	50.0 AA STEP	50	0	2	2	0	0	0	0.02	0.0099	1	0	EITVATGGFIYTGEVVHR EITVATGGFIYTGEVVHR		0	3	4	0	0	0
N/A	cDNA FLJ61564; highly similar to Plexin domain-containing protein 2	B4E367_HUMAN	50Step_Domain_p200.0_to_250.0	200	250	50.0 AA STEP	50	2	1	1	0	0	0	0.02	0.0099	1	0	EIPVLVTQISSTNHPVK EIPVLVTQISSTNHPVK EIPVLVTQISSTNHPVK		2	2	1	0	0	0
C8G	Complement component C8 gamma chain	CO8G_HUMAN	80Step_Domain_p0_to_80	0	80	80.0 AA STEP	80	4	4	0	0	0	0	0.0375	0.2061	3	0	AEATTLHVAPQGTAMAVSTFR AEATTLHVAPQGTAMAVSTFR		8	6	0	0	0	0
C8G	Complement component C8 gamma chain	CO8G_HUMAN	80Step_Domain_p80.0_to_160.0	80	160	80.0 AA STEP	80	9	7	12	0	0	0	0.1125	0	9	0	AEATTLHVAPQGTAMAVSTFR QLYGDTGVLGR SLPVSDSVLSGFEQR AEATTLHVAPQGTAMAVSTFR QLYGDTGVLGR SLPVSDSVLSGFEQR QLYGDTGVLGR SLPVSDSVLSGFEQR		18	11	3	0	0	0
C8G	Complement component C8 gamma chain	CO8G_HUMAN	80Step_Domain_p160.0_to_202.0	160	202	80.0 AA STEP	42	7	8	4	0	0	0	0.142857	0.0015	6	0	SLPVSDSVLSGFEQR VQEAHLTEDQIFYFPK SLPVSDSVLSGFEQR VQEAHLTEDQIFYFPK SLPVSDSVLSGFEQR		13	13	1	0	0	0
C8G	Complement component C8 gamma chain	CO8G_HUMAN	100Step_Domain_p0_to_100	0	100	100.0 AA STEP	100	4	4	0	0	0	0	0.03	0.0918	3	0	AEATTLHVAPQGTAMAVSTFR AEATTLHVAPQGTAMAVSTFR		8	6	0	0	0	0
C8G	Complement component C8 gamma chain	CO8G_HUMAN	100Step_Domain_p100.0_to_200.0	100	200	100.0 AA STEP	100	8	8	12	0	0	0	0.09	0	9	0	QLYGDTGVLGR SLPVSDSVLSGFEQR VQEAHLTEDQIFYFPK QLYGDTGVLGR SLPVSDSVLSGFEQR VQEAHLTEDQIFYFPK QLYGDTGVLGR SLPVSDSVLSGFEQR		16	14	3	0	0	0
C8G	Complement component C8 gamma chain	CO8G_HUMAN	100Step_Domain_p200.0_to_202.0	200	202	100.0 AA STEP	2	0	0	0	0	0	0	0	1	0	0			0	0	0	0	0	0
ITIH4	Inter-alpha-trypsin inhibitor heavy chain H4	ITIH4_HUMAN	Proline-rich (PRR) potential bioactive peptide	658	688	REGIONS	30	3	4	0	0	0	0	0.0666667	0.0504	2	0	QLGLPGPPDVPDHAAYHPFR QLGLPGPPDVPDHAAYHPFR		5	4	0	0	0	0
ITIH4	Inter-alpha-trypsin inhibitor heavy chain H4	ITIH4_HUMAN	O-glycosylated at three sites	719	725	REGIONS	6	0	0	0	0	0	0	0	1	0	0			0	0	0	0	0	0
ITIH4	Inter-alpha-trypsin inhibitor heavy chain H4	ITIH4_HUMAN	VIT	29	148	DOMAINS	119	22	13	8	0	0	0	0.117647	0.0112	14	0	AEAQAQYSAAVAK ANTVQEATFQMELPK NGIDIYSLTVDSR NMEQFQVSVSVAPNAK AEAQAQYSAAVAK ANTVQEATFQMELPK ITFELVYEELLK NMEQFQVSVSVAPNAK ANTVQEATFQMELPK		44	14	1	0	0	0
ITIH4	Inter-alpha-trypsin inhibitor heavy chain H4	ITIH4_HUMAN	VWFA	272	432	DOMAINS	160	8	12	0	0	0	0	0.04375	0.2386	7	0	DQFNLIVFSTEATQWRPSLVPASAENVNK ILDDLSPR LALDNGGLAR NVVFVIDK DQFNLIVFSTEATQWRPSLVPASAENVNK ILDDLSPR LALDNGGLAR LPEGSVSLIILLTDGDPTVGETNPR NVVFVIDK		16	13	0	0	0	0
SRPX2	Sushi repeat-containing protein SRPX2	SRPX2_HUMAN	50Step_Domain_p400.0_to_450.0	400	450	50.0 AA STEP	50	15	12	11	7	5	5	0.14	0.01	13	6	EQQLSANIIEELR SYFNMVLIDK EQQLSANIIEELR IREQQLSANIIEELR SYFNMVLIDK EQQLSANIIEELR SYFNMVLIDK	EQQLSANIIEELR SYFNMVLIDK EQQLSANIIEELR SYFNMVLIDK EQQLSANIIEELR SYFNMVLIDK	6	11	12	4	3	8
IL17B	Interleukin-17B	IL17B_HUMAN	50Step_Domain_p100.0_to_150.0	100	150	50.0 AA STEP	50	0	0	7	7	8	6	-0.1	0.01	2	7	IPVDLPEAR	IPVDLPEAR SLSPWGYSINHDPSR SMVSVPVFSQVPVR IPVDLPEAR SLSPWGYSINHDPSR SMVSVPVFSQVPVR IPVDLPEAR SMVSVPVFSQVPVR	0	0	2	14	15	11
KRT8	Keratin; type II cytoskeletal 8	K2C8_HUMAN	50Step_Domain_p350.0_to_400.0	350	400	50.0 AA STEP	50	0	0	0	2	3	2	-0.04	0.01	0	2		LSELEAALQR LSELEAALQR EYQELMNVK LSELEAALQR	0	0	0	1	2	3
SPP1	Secreted phosphoprotein 1 (Osteopontin; bone sialoprotein I; early T-lymphocyte activation 1); isoform CRA_c	A0A024RDE6_HUMAN	50Step_Domain_p200.0_to_250.0	200	250	50.0 AA STEP	50	0	0	2	3	2	2	-0.02	0.0102	1	2	AIPVAQDLNAPSDWDSR DSYETSQLDDQSAETHSHK	AIPVAQDLNAPSDWDSR AIPVAQDLNAPSDWDSR AIPVAQDLNAPSDWDSR	0	0	2	5	3	3
IGHG4	Immunoglobulin heavy constant gamma 4	IGHG4_HUMAN	50Step_Domain_p200.0_to_250.0	200	250	50.0 AA STEP	50	9	5	0	0	0	0	0.1	0.0105	5	0	EPQVYTLPPSQEEMTK GLPSSIEK EPQVYTLPPSQEEMTK		18	3	0	0	0	0
F13A1	Coagulation factor XIII A chain	F13A_HUMAN	50Step_Domain_p700.0_to_732.0	700	732	50.0 AA STEP	32	11	3	3	0	0	0	0.1875	0.0105	6	0	HVYGELDVQIQR LIASMSSDSLR LIASMSSDSLR HVYGELDVQIQR LIASMSSDSLR		9	3	6	0	0	0
SERPINA5	Plasma serine protease inhibitor	IPSP_HUMAN	50Step_Domain_p200.0_to_250.0	200	250	50.0 AA STEP	50	16	18	18	17	27	27	-0.14	0.0108	17	24	EDQYHYLLDR GTQEQDFYVTSETVVR EDQYHYLLDR GTQEQDFYVTSETVVR EDQYHYLLDR GTQEQDFYVTSETVVR	EDQYHYLLDR GTQEQDFYVTSETVVR EDQYHYLLDR GTQEQDFYVTSETVVR EDQYHYLLDR GTQEQDFYVTSETVVR	8	14	22	18	41	38
FLT1	Vascular endothelial growth factor receptor 1	VGFR1_HUMAN	50Step_Domain_p100.0_to_150.0	100	150	50.0 AA STEP	50	1	0	1	0	0	0	0.02	0.0108	1	0	YLAVPTSK YLAVPTSK		1	0	1	0	0	0
FLT1	Vascular endothelial growth factor receptor 1	VGFR1_HUMAN	50Step_Domain_p600.0_to_650.0	600	650	50.0 AA STEP	50	1	0	1	0	0	0	0.02	0.0108	1	0	NVYTGEEILQK NVYTGEEILQK		2	0	2	0	0	0
C9	Complement component C9	CO9_HUMAN	50Step_Domain_p500.0_to_550.0	500	550	50.0 AA STEP	50	4	2	7	0	0	0	0.08	0.0108	4	0	AIEDYINEFSVR AIEDYINEFSVR AIEDYINEFSVR		7	2	2	0	0	0
N/A	cDNA FLJ51535; highly similar to Phosphatidylethanolamine-binding protein 1	B4DRT4_HUMAN	50Step_Domain_p100.0_to_150.0	100	150	50.0 AA STEP	50	0	0	1	2	2	2	-0.04	0.0108	0	2	GNDISSGTVLSDYVGSGPPK	GNDISSGTVLSDYVGSGPPK GNDISSGTVLSDYVGSGPPK GNDISSGTVLSDYVGSGPPK	0	0	1	3	2	3
HEL-S-34	Epididymis secretory protein Li 34	D9IAI1_HUMAN	50Step_Domain_p100.0_to_150.0	100	150	50.0 AA STEP	50	0	0	1	2	2	2	-0.04	0.0108	0	2	GNDISSGTVLSDYVGSGPPK	GNDISSGTVLSDYVGSGPPK GNDISSGTVLSDYVGSGPPK GNDISSGTVLSDYVGSGPPK	0	0	1	3	2	3
PEBP1	Phosphatidylethanolamine-binding protein 1	PEBP1_HUMAN	50Step_Domain_p100.0_to_150.0	100	150	50.0 AA STEP	50	0	0	1	2	2	2	-0.04	0.0108	0	2	GNDISSGTVLSDYVGSGPPK	GNDISSGTVLSDYVGSGPPK GNDISSGTVLSDYVGSGPPK GNDISSGTVLSDYVGSGPPK	0	0	1	3	2	3
CP	Ceruloplasmin	CERU_HUMAN	50Step_Domain_p600.0_to_650.0	600	650	50.0 AA STEP	50	11	7	14	22	12	25	-0.18	0.011	11	20	MFTTAPDQVDKEDEDFQESNK MFTTAPDQVDKEDEDFQESNK MFTTAPDQVDKEDEDFQESNK	MFTTAPDQVDKEDEDFQESNK MFTTAPDQVDKEDEDFQESNK MFTTAPDQVDKEDEDFQESNK	17	10	6	15	7	14
HPX	Hemopexin	HEMO_HUMAN	50Step_Domain_p350.0_to_400.0	350	400	50.0 AA STEP	50	8	6	19	0	0	0	0.22	0.011	11	0	EVGTPHGIILDSVDAAFICPGSSR RLWWLDLK SGAQATWTELPWPHEK RLWWLDLK SGAQATWTELPWPHEK SGAQATWTELPWPHEK		16	7	6	0	0	0
DPP4	Dipeptidyl peptidase 4	DPP4_HUMAN	50Step_Domain_p450.0_to_500.0	450	500	50.0 AA STEP	50	0	0	0	1	1	0	-0.02	0.0112	0	1		VLEDNSALDK VLEDNSALDK	0	0	0	1	1	0
DPP4	Dipeptidyl peptidase 4	DPP4_HUMAN	50Step_Domain_p500.0_to_550.0	500	550	50.0 AA STEP	50	0	0	0	1	1	0	-0.02	0.0112	0	1		VLEDNSALDK VLEDNSALDK	0	0	0	1	1	0
SERPINE1	Plasminogen activator inhibitor 1	PAI1_HUMAN	50Step_Domain_p300.0_to_350.0	300	350	50.0 AA STEP	50	3	5	5	0	0	0	0.08	0.0117	4	0	QFQADFTSLSDQEPLHVAQALQK FSLETEVDLR QFQADFTSLSDQEPLHVAQALQK FSLETEVDLR KPLENLGMTDMFR QFQADFTSLSDQEPLHVAQALQK		2	7	10	0	0	0
PRDX4	Peroxiredoxin-4	PRDX4_HUMAN	50Step_Domain_p150.0_to_200.0	150	200	50.0 AA STEP	50	1	1	1	0	0	1	0.02	0.012	1	0	IPLLSDLTHQISK IPLLSDLTHQISK IPLLSDLTHQISK	DYGVYLEDSGHTLR	1	2	2	0	0	2
ITIH4	Inter-alpha-trypsin inhibitor heavy chain H4	ITIH4_HUMAN	80Step_Domain_p0_to_80	0	80	80.0 AA STEP	80	10	7	8	0	0	0	0.1	0.0564	8	0	ANTVQEATFQMELPK NGIDIYSLTVDSR ANTVQEATFQMELPK ANTVQEATFQMELPK		20	8	1	0	0	0
ITIH4	Inter-alpha-trypsin inhibitor heavy chain H4	ITIH4_HUMAN	80Step_Domain_p80.0_to_160.0	80	160	80.0 AA STEP	80	14	9	16	0	0	0	0.1625	0	13	0	AEAQAQYSAAVAK LGVYELLLK NMEQFQVSVSVAPNAK AEAQAQYSAAVAK ITFELVYEELLK LGVYELLLK NMEQFQVSVSVAPNAK LGVYELLLK		28	10	2	0	0	0
ITIH4	Inter-alpha-trypsin inhibitor heavy chain H4	ITIH4_HUMAN	80Step_Domain_p160.0_to_240.0	160	240	80.0 AA STEP	80	12	6	16	0	0	0	0.1375	0.0024	11	0	FKPTLSQQQK LGVYELLLK SPEQQETVLDGNLIIR VRPQQLVK LGVYELLLK SPEQQETVLDGNLIIR LGVYELLLK		24	7	2	0	0	0
ITIH4	Inter-alpha-trypsin inhibitor heavy chain H4	ITIH4_HUMAN	80Step_Domain_p240.0_to_320.0	240	320	80.0 AA STEP	80	7	10	0	0	0	0	0.075	0.5928	6	0	DQFNLIVFSTEATQWRPSLVPASAENVNK ILDDLSPR NVVFVIDK DQFNLIVFSTEATQWRPSLVPASAENVNK ILDDLSPR NVVFVIDK		13	11	0	0	0	0
ITIH4	Inter-alpha-trypsin inhibitor heavy chain H4	ITIH4_HUMAN	80Step_Domain_p320.0_to_400.0	320	400	80.0 AA STEP	80	1	3	0	0	0	0	0.0125	1	1	0	DQFNLIVFSTEATQWRPSLVPASAENVNK DQFNLIVFSTEATQWRPSLVPASAENVNK LPEGSVSLIILLTDGDPTVGETNPR		1	3	0	0	0	0
ITIH4	Inter-alpha-trypsin inhibitor heavy chain H4	ITIH4_HUMAN	80Step_Domain_p400.0_to_480.0	400	480	80.0 AA STEP	80	2	1	0	0	0	0	0.0125	1	1	0	LALDNGGLAR LALDNGGLAR		3	1	0	0	0	0
ITIH4	Inter-alpha-trypsin inhibitor heavy chain H4	ITIH4_HUMAN	80Step_Domain_p480.0_to_560.0	480	560	80.0 AA STEP	80	6	8	0	0	0	0	0.0625	1	5	0	GPDVLTATVSGK YIFHNFMER GPDVLTATVSGK LWAYLTIQQLLEQTVSASDADQQALR YIFHNFMER		12	9	0	0	0	0
ITIH4	Inter-alpha-trypsin inhibitor heavy chain H4	ITIH4_HUMAN	80Step_Domain_p560.0_to_640.0	560	640	80.0 AA STEP	80	1	1	0	0	0	0	0.0125	1	1	0	IPKPEASFSPR LWAYLTIQQLLEQTVSASDADQQALR		2	1	0	0	0	0
ITIH4	Inter-alpha-trypsin inhibitor heavy chain H4	ITIH4_HUMAN	80Step_Domain_p640.0_to_720.0	640	720	80.0 AA STEP	80	4	4	0	0	0	0	0.0375	1	3	0	IPKPEASFSPR QLGLPGPPDVPDHAAYHPFR QLGLPGPPDVPDHAAYHPFR		7	4	0	0	0	0
ITIH4	Inter-alpha-trypsin inhibitor heavy chain H4	ITIH4_HUMAN	80Step_Domain_p720.0_to_800.0	720	800	80.0 AA STEP	80	9	10	16	0	0	0	0.15	0.0012	12	0	AGFSWIEVTFK NPLVWVHASPEHVVVTR QGPVNLLSDPEQGVEVTGQYER NPLVWVHASPEHVVVTR QGPVNLLSDPEQGVEVTGQYER NPLVWVHASPEHVVVTR QGPVNLLSDPEQGVEVTGQYER		17	11	2	0	0	0
ITIH4	Inter-alpha-trypsin inhibitor heavy chain H4	ITIH4_HUMAN	80Step_Domain_p800.0_to_880.0	800	880	80.0 AA STEP	80	13	24	39	0	0	0	0.3125	0	25	0	ETLFSVMPGLK FSSHVGGTLGQFYQEVLWGSPAASDDGR FSSHVGGTLGQFYQEVLWGSPAASDDGRR NPLVWVHASPEHVVVTR TGLLLLSDPDK ETLFSVMPGLK FSSHVGGTLGQFYQEVLWGSPAASDDGR FSSHVGGTLGQFYQEVLWGSPAASDDGRR NPLVWVHASPEHVVVTR TGLLLLSDPDK VTIGLLFWDGR ETLFSVMPGLK FSSHVGGTLGQFYQEVLWGSPAASDDGR NPLVWVHASPEHVVVTR TGLLLLSDPDK		26	26	5	0	0	0
ITIH4	Inter-alpha-trypsin inhibitor heavy chain H4	ITIH4_HUMAN	80Step_Domain_p880.0_to_930.0	880	930	80.0 AA STEP	50	3	6	8	0	0	0	0.12	0.5928	6	0	FSSHVGGTLGQFYQEVLWGSPAASDDGR FSSHVGGTLGQFYQEVLWGSPAASDDGRR FSSHVGGTLGQFYQEVLWGSPAASDDGR FSSHVGGTLGQFYQEVLWGSPAASDDGRR FSSHVGGTLGQFYQEVLWGSPAASDDGR		6	7	1	0	0	0
ITIH4	Inter-alpha-trypsin inhibitor heavy chain H4	ITIH4_HUMAN	100Step_Domain_p0_to_100	0	100	100.0 AA STEP	100	14	10	8	0	0	0	0.11	0.02	11	0	AEAQAQYSAAVAK ANTVQEATFQMELPK NGIDIYSLTVDSR AEAQAQYSAAVAK ANTVQEATFQMELPK ANTVQEATFQMELPK		28	11	1	0	0	0
ITIH4	Inter-alpha-trypsin inhibitor heavy chain H4	ITIH4_HUMAN	100Step_Domain_p100.0_to_200.0	100	200	100.0 AA STEP	100	15	9	16	0	0	0	0.13	0.002	13	0	AEAQAQYSAAVAK LGVYELLLK NMEQFQVSVSVAPNAK VRPQQLVK AEAQAQYSAAVAK ITFELVYEELLK LGVYELLLK NMEQFQVSVSVAPNAK LGVYELLLK		29	10	2	0	0	0
ITIH4	Inter-alpha-trypsin inhibitor heavy chain H4	ITIH4_HUMAN	100Step_Domain_p200.0_to_300.0	200	300	100.0 AA STEP	100	16	11	0	0	0	0	0.09	0.081	9	0	FKPTLSQQQK ILDDLSPR NVVFVIDK SPEQQETVLDGNLIIR ILDDLSPR NVVFVIDK SPEQQETVLDGNLIIR		31	12	0	0	0	0
ITIH4	Inter-alpha-trypsin inhibitor heavy chain H4	ITIH4_HUMAN	100Step_Domain_p300.0_to_400.0	300	400	100.0 AA STEP	100	6	7	0	0	0	0	0.04	1	4	0	DQFNLIVFSTEATQWRPSLVPASAENVNK ILDDLSPR DQFNLIVFSTEATQWRPSLVPASAENVNK ILDDLSPR LPEGSVSLIILLTDGDPTVGETNPR		11	8	0	0	0	0
ITIH4	Inter-alpha-trypsin inhibitor heavy chain H4	ITIH4_HUMAN	100Step_Domain_p400.0_to_500.0	400	500	100.0 AA STEP	100	2	1	0	0	0	0	0.01	1	1	0	LALDNGGLAR LALDNGGLAR		3	1	0	0	0	0
ITIH4	Inter-alpha-trypsin inhibitor heavy chain H4	ITIH4_HUMAN	100Step_Domain_p500.0_to_600.0	500	600	100.0 AA STEP	100	6	8	0	0	0	0	0.05	1	5	0	GPDVLTATVSGK YIFHNFMER GPDVLTATVSGK LWAYLTIQQLLEQTVSASDADQQALR YIFHNFMER		12	9	0	0	0	0
ITIH4	Inter-alpha-trypsin inhibitor heavy chain H4	ITIH4_HUMAN	100Step_Domain_p600.0_to_700.0	600	700	100.0 AA STEP	100	4	4	0	0	0	0	0.03	1	3	0	IPKPEASFSPR QLGLPGPPDVPDHAAYHPFR QLGLPGPPDVPDHAAYHPFR		7	4	0	0	0	0
ITIH4	Inter-alpha-trypsin inhibitor heavy chain H4	ITIH4_HUMAN	100Step_Domain_p700.0_to_800.0	700	800	100.0 AA STEP	100	9	10	16	0	0	0	0.12	0.008	12	0	AGFSWIEVTFK NPLVWVHASPEHVVVTR QGPVNLLSDPEQGVEVTGQYER NPLVWVHASPEHVVVTR QGPVNLLSDPEQGVEVTGQYER NPLVWVHASPEHVVVTR QGPVNLLSDPEQGVEVTGQYER		17	11	2	0	0	0
ITIH4	Inter-alpha-trypsin inhibitor heavy chain H4	ITIH4_HUMAN	100Step_Domain_p800.0_to_900.0	800	900	100.0 AA STEP	100	13	24	39	0	0	0	0.25	0	25	0	ETLFSVMPGLK FSSHVGGTLGQFYQEVLWGSPAASDDGR FSSHVGGTLGQFYQEVLWGSPAASDDGRR NPLVWVHASPEHVVVTR TGLLLLSDPDK ETLFSVMPGLK FSSHVGGTLGQFYQEVLWGSPAASDDGR FSSHVGGTLGQFYQEVLWGSPAASDDGRR NPLVWVHASPEHVVVTR TGLLLLSDPDK VTIGLLFWDGR ETLFSVMPGLK FSSHVGGTLGQFYQEVLWGSPAASDDGR NPLVWVHASPEHVVVTR TGLLLLSDPDK		26	26	5	0	0	0
ITIH4	Inter-alpha-trypsin inhibitor heavy chain H4	ITIH4_HUMAN	100Step_Domain_p900.0_to_930.0	900	930	100.0 AA STEP	30	0	0	0	0	0	0	0	1	0	0			0	0	0	0	0	0
SMOC1	SPARC-related modular calcium-binding protein 1	SMOC1_HUMAN	Kazal-like	37	89	DOMAINS	52	0	0	0	0	0	1	0	1	0	0		DPTLGVVHR	0	0	0	0	0	1
SMOC1	SPARC-related modular calcium-binding protein 1	SMOC1_HUMAN	Thyroglobulin type-1 1	92	158	DOMAINS	66	0	0	0	0	0	0	0	1	0	0			0	0	0	0	0	0
SMOC1	SPARC-related modular calcium-binding protein 1	SMOC1_HUMAN	Thyroglobulin type-1 2	224	292	DOMAINS	68	3	3	2	1	4	2	0.0147059	1	3	2	QSALEEAQQNPR QSALEEAQQNPR QSALEEAQQNPR	QSALEEAQQNPR QSALEEAQQNPR QSALEEAQQNPR	2	2	2	2	5	2
SMOC1	SPARC-related modular calcium-binding protein 1	SMOC1_HUMAN	EF-hand 1	359	394	DOMAINS	35	3	7	7	4	3	4	0.0571429	0.15	6	4	FSEPDPSHTLEER VVHWYFSQLDSNSSNDINK FSEPDPSHTLEER VVHWYFSQLDSNSSNDINK FSEPDPSHTLEER VVHWYFSQLDSNSSNDINK	FSEPDPSHTLEER VVHWYFSQLDSNSSNDINK FSEPDPSHTLEER VVHWYFSQLDSNSSNDINK FSEPDPSHTLEER	2	5	9	6	3	5
SMOC1	SPARC-related modular calcium-binding protein 1	SMOC1_HUMAN	EF-hand 2	396	431	DOMAINS	35	3	4	1	2	2	2	0.0285714	1	3	2	VISLPELK VISLPELK VISLPELK	VISLPELK VISLPELK VISLPELK	2	3	1	3	2	2
PRDX4	Peroxiredoxin-4	PRDX4_HUMAN	50Step_Domain_p200.0_to_250.0	200	250	50.0 AA STEP	50	1	1	1	0	0	1	0.02	0.012	1	0	LVQAFQYTDK LVQAFQYTDK QITLNDLPVGR QITLNDLPVGR	LVQAFQYTDK QITLNDLPVGR	1	2	1	0	0	2
HEL-S-97n	Epididymis secretory sperm binding protein Li 97n	V9HW63_HUMAN	50Step_Domain_p150.0_to_200.0	150	200	50.0 AA STEP	50	1	1	1	0	0	1	0.02	0.012	1	0	IPLLSDLTHQISK IPLLSDLTHQISK IPLLSDLTHQISK	DYGVYLEDSGHTLR	1	2	2	0	0	2
HEL-S-97n	Epididymis secretory sperm binding protein Li 97n	V9HW63_HUMAN	50Step_Domain_p200.0_to_250.0	200	250	50.0 AA STEP	50	1	1	1	0	0	1	0.02	0.012	1	0	LVQAFQYTDK LVQAFQYTDK QITLNDLPVGR QITLNDLPVGR	LVQAFQYTDK QITLNDLPVGR	1	2	1	0	0	2
N/A	Actin-depolymerizing factor	B7Z992_HUMAN	50Step_Domain_p500.0_to_550.0	500	550	50.0 AA STEP	50	13	5	9	13	12	17	-0.1	0.012	9	14	AGALNSNDAFVLK TGAQELLR TPSAAYLWVGTGASEAEK AGALNSNDAFVLK TGAQELLR TPSAAYLWVGTGASEAEK AGALNSNDAFVLK TGAQELLR TPSAAYLWVGTGASEAEK	AGALNSNDAFVLK TGAQELLR TPSAAYLWVGTGASEAEK AGALNSNDAFVLK TPSAAYLWVGTGASEAEK AGALNSNDAFVLK TGAQELLR TPSAAYLWVGTGASEAEK	17	7	10	12	8	13
COL12A1	Collagen alpha-1(XII) chain	COCA1_HUMAN	50Step_Domain_p1300.0_to_1350.0	1300	1350	50.0 AA STEP	50	1	0	3	5	4	5	-0.08	0.0124	1	5	MIATDPDDTHAYNVADFESLSR MIATDPDDTHAYNVADFESLSR	IGVLITDGK MIATDPDDTHAYNVADFESLSR NADEVELK SQDDVEAPSK DEGVELFAIGIK IGVLITDGK MIATDPDDTHAYNVADFESLSR DEGVELFAIGIK IGVLITDGK MIATDPDDTHAYNVADFESLSR NADEVELK	1	0	1	8	5	9
TUBB4B	Tubulin beta-4B chain	TBB4B_HUMAN	50Step_Domain_p50.0_to_100.0	50	100	50.0 AA STEP	50	0	0	2	2	2	2	-0.02	0.0126	1	2	AVLVDLEPGTMDSVR INVYYNEATGGK	AVLVDLEPGTMDSVR INVYYNEATGGK AVLVDLEPGTMDSVR AVLVDLEPGTMDSVR INVYYNEATGGK	0	0	2	3	1	3
TUBB2C	Tubulin beta chain	Q8IZ29_HUMAN	50Step_Domain_p50.0_to_100.0	50	100	50.0 AA STEP	50	0	0	2	2	2	2	-0.02	0.0126	1	2	AVLVDLEPGTMDSVR INVYYNEATGGK	AVLVDLEPGTMDSVR INVYYNEATGGK AVLVDLEPGTMDSVR AVLVDLEPGTMDSVR INVYYNEATGGK	0	0	2	3	1	3
RPL4	60S ribosomal protein L4	RL4_HUMAN	50Step_Domain_p100.0_to_150.0	100	150	50.0 AA STEP	50	0	0	0	1	0	1	-0.02	0.0126	0	1		IEEVPELPLVVEDK IEEVPELPLVVEDK	0	0	0	1	0	1
RPL4	60S ribosomal protein L4	RL4_HUMAN	50Step_Domain_p150.0_to_200.0	150	200	50.0 AA STEP	50	0	0	0	1	0	1	-0.02	0.0126	0	1		IEEVPELPLVVEDK IEEVPELPLVVEDK	0	0	0	1	0	1
SMOC1	SPARC-related modular calcium-binding protein 1	SMOC1_HUMAN	80Step_Domain_p0_to_80	0	80	80.0 AA STEP	80	0	0	0	0	0	1	0	1	0	0		DPTLGVVHR	0	0	0	0	0	1
SMOC1	SPARC-related modular calcium-binding protein 1	SMOC1_HUMAN	80Step_Domain_p80.0_to_160.0	80	160	80.0 AA STEP	80	0	0	0	0	0	1	0	1	0	0		DPTLGVVHR	0	0	0	0	0	1
SMOC1	SPARC-related modular calcium-binding protein 1	SMOC1_HUMAN	80Step_Domain_p160.0_to_240.0	160	240	80.0 AA STEP	80	3	3	2	1	4	2	0.0125	1	3	2	QSALEEAQQNPR QSALEEAQQNPR QSALEEAQQNPR	QSALEEAQQNPR QSALEEAQQNPR QSALEEAQQNPR	2	2	2	2	5	2
SMOC1	SPARC-related modular calcium-binding protein 1	SMOC1_HUMAN	80Step_Domain_p240.0_to_320.0	240	320	80.0 AA STEP	80	8	3	7	8	10	8	-0.0375	0.105	6	9	QSALEEAQQNPR TTEADDPFKDR QSALEEAQQNPR QSALEEAQQNPR TTEADDPFK TTEADDPFKDR	QSALEEAQQNPR TTEADDPFK TTEADDPFKDR QSALEEAQQNPR TTEADDPFKDR QSALEEAQQNPR TTEADDPFK TTEADDPFKDR	5	2	9	11	12	11
SMOC1	SPARC-related modular calcium-binding protein 1	SMOC1_HUMAN	80Step_Domain_p320.0_to_400.0	320	400	80.0 AA STEP	80	3	7	7	4	3	4	0.025	0.4062	6	4	FSEPDPSHTLEER VVHWYFSQLDSNSSNDINK FSEPDPSHTLEER VVHWYFSQLDSNSSNDINK FSEPDPSHTLEER VVHWYFSQLDSNSSNDINK	FSEPDPSHTLEER VVHWYFSQLDSNSSNDINK FSEPDPSHTLEER VVHWYFSQLDSNSSNDINK FSEPDPSHTLEER	2	5	9	6	3	5
SMOC1	SPARC-related modular calcium-binding protein 1	SMOC1_HUMAN	80Step_Domain_p400.0_to_434.0	400	434	80.0 AA STEP	34	3	4	1	2	2	2	0.0294118	1	3	2	VISLPELK VISLPELK VISLPELK	VISLPELK VISLPELK VISLPELK	2	3	1	3	2	2
SMOC1	SPARC-related modular calcium-binding protein 1	SMOC1_HUMAN	100Step_Domain_p0_to_100	0	100	100.0 AA STEP	100	0	0	0	0	0	1	0	1	0	0		DPTLGVVHR	0	0	0	0	0	1
SMOC1	SPARC-related modular calcium-binding protein 1	SMOC1_HUMAN	100Step_Domain_p100.0_to_200.0	100	200	100.0 AA STEP	100	0	0	0	0	0	0	0	1	0	0			0	0	0	0	0	0
SMOC1	SPARC-related modular calcium-binding protein 1	SMOC1_HUMAN	100Step_Domain_p200.0_to_300.0	200	300	100.0 AA STEP	100	8	3	7	8	10	8	-0.03	0.146	6	9	QSALEEAQQNPR TTEADDPFKDR QSALEEAQQNPR QSALEEAQQNPR TTEADDPFK TTEADDPFKDR	QSALEEAQQNPR TTEADDPFK TTEADDPFKDR QSALEEAQQNPR TTEADDPFKDR QSALEEAQQNPR TTEADDPFK TTEADDPFKDR	5	2	9	11	12	11
SMOC1	SPARC-related modular calcium-binding protein 1	SMOC1_HUMAN	100Step_Domain_p300.0_to_400.0	300	400	100.0 AA STEP	100	8	7	12	11	9	11	-0.01	1	9	10	FSEPDPSHTLEER TTEADDPFKDR VVHWYFSQLDSNSSNDINK FSEPDPSHTLEER VVHWYFSQLDSNSSNDINK FSEPDPSHTLEER TTEADDPFK TTEADDPFKDR VVHWYFSQLDSNSSNDINK	FSEPDPSHTLEER TTEADDPFK TTEADDPFKDR VVHWYFSQLDSNSSNDINK FSEPDPSHTLEER TTEADDPFKDR VVHWYFSQLDSNSSNDINK FSEPDPSHTLEER TTEADDPFK TTEADDPFKDR	5	5	16	15	10	14
SMOC1	SPARC-related modular calcium-binding protein 1	SMOC1_HUMAN	100Step_Domain_p400.0_to_434.0	400	434	100.0 AA STEP	34	3	4	1	2	2	2	0.0294118	1	3	2	VISLPELK VISLPELK VISLPELK	VISLPELK VISLPELK VISLPELK	2	3	1	3	2	2
RPL4	60S ribosomal protein L4	RL4_HUMAN	50Step_Domain_p250.0_to_300.0	250	300	50.0 AA STEP	50	0	0	0	1	0	1	-0.02	0.0126	0	1		MINTDLSR LDELYGTWR	0	0	0	1	0	1
N/A	60S ribosomal protein L4	Q59GY2_HUMAN	50Step_Domain_p150.0_to_200.0	150	200	50.0 AA STEP	50	0	0	0	1	0	1	-0.02	0.0126	0	1		IEEVPELPLVVEDK IEEVPELPLVVEDK	0	0	0	1	0	1
N/A	60S ribosomal protein L4	Q59GY2_HUMAN	50Step_Domain_p250.0_to_300.0	250	300	50.0 AA STEP	50	0	0	0	1	0	1	-0.02	0.0126	0	1		MINTDLSR LDELYGTWR	0	0	0	1	0	1
HRG	Histidine-rich glycoprotein	HRG_HUMAN	50Step_Domain_p150.0_to_200.0	150	200	50.0 AA STEP	50	13	8	14	0	0	13	0.16	0.0132	12	4	DSPVLIDFFEDTER EENDDFASFR GGEGTGYFVDFSVR YKEENDDFASFR DSPVLIDFFEDTER EENDDFASFR GGEGTGYFVDFSVR YKEENDDFASFR DSPVLIDFFEDTER GGEGTGYFVDFSVR YKEENDDFASFR	DSPVLIDFFEDTER GGEGTGYFVDFSVR	26	13	5	0	0	2
PDIA3	Protein disulfide-isomerase A3	PDIA3_HUMAN	50Step_Domain_p400.0_to_450.0	400	450	50.0 AA STEP	50	0	0	1	3	4	2	-0.06	0.0132	0	3	DPNIVIAK	DPNIVIAK MDATANDVPSPYEVR DPNIVIAK MDATANDVPSPYEVR DPNIVIAK MDATANDVPSPYEVR	0	0	2	4	3	3
HEL-S-269	Protein disulfide-isomerase	V9HVY3_HUMAN	50Step_Domain_p400.0_to_450.0	400	450	50.0 AA STEP	50	0	0	1	3	4	2	-0.06	0.0132	0	3	DPNIVIAK	DPNIVIAK MDATANDVPSPYEVR DPNIVIAK MDATANDVPSPYEVR DPNIVIAK MDATANDVPSPYEVR	0	0	2	4	3	3
N/A	Junction plakoglobin	B4DE59_HUMAN	50Step_Domain_p100.0_to_150.0	100	150	50.0 AA STEP	50	0	0	1	0	0	0	0	0.0132	0	0	LAEPSQLLK SAIVHLINYQDDAELATR		0	0	2	0	0	0
N/A	cDNA; FLJ93258; highly similar to Homo sapiens WFIKKN-related protein (WFIKKNRP); mRNA	B2R731_HUMAN	50Step_Domain_p450.0_to_500.0	450	500	50.0 AA STEP	50	0	0	0	0	1	0	0	0.0132	0	0		SDFVILGR VSELTEEPDSGR	0	0	0	0	2	0
WFIKKN2	WAP; Kazal; immunoglobulin; Kunitz and NTR domain-containing protein 2	WFKN2_HUMAN	50Step_Domain_p450.0_to_500.0	450	500	50.0 AA STEP	50	0	0	0	0	1	0	0	0.0132	0	0		SDFVILGR VSELTEEPDSGR	0	0	0	0	2	0
EZR	Ezrin	EZRI_HUMAN	50Step_Domain_p350.0_to_400.0	350	400	50.0 AA STEP	50	0	0	0	0	0	2	-0.02	0.0132	0	1		ALQLEEER ELSEQIQR	0	0	0	0	0	3
HEL-S-105	Epididymis secretory protein Li 105	V9HW42_HUMAN	50Step_Domain_p350.0_to_400.0	350	400	50.0 AA STEP	50	0	0	0	0	0	2	-0.02	0.0132	0	1		ALQLEEER ELSEQIQR	0	0	0	0	0	3
ITIH5	Inter-alpha-trypsin inhibitor heavy chain H5	ITIH5_HUMAN	50Step_Domain_p150.0_to_200.0	150	200	50.0 AA STEP	50	2	6	3	0	0	0	0.08	0.0133	4	0	AAFFLSYEELLQR AAFFLSYEELLQR AAFFLSYEELLQR		1	3	2	0	0	0
N/A	Complement component 8 subunit beta	A8K9M5_HUMAN	80Step_Domain_p0_to_80	0	80	80.0 AA STEP	80	0	0	0	0	0	0	0	1	0	0			0	0	0	0	0	0
N/A	Complement component 8 subunit beta	A8K9M5_HUMAN	80Step_Domain_p80.0_to_160.0	80	160	80.0 AA STEP	80	0	0	0	0	0	0	0	1	0	0			0	0	0	0	0	0
N/A	Complement component 8 subunit beta	A8K9M5_HUMAN	80Step_Domain_p160.0_to_240.0	160	240	80.0 AA STEP	80	4	2	0	0	0	0	0.025	0.7304	2	0	EYESYSDFER KPYNVESYTPQTQGK EYESYSDFER KPYNVESYTPQTQGK		5	3	0	0	0	0
N/A	Complement component 8 subunit beta	A8K9M5_HUMAN	80Step_Domain_p240.0_to_320.0	240	320	80.0 AA STEP	80	7	8	7	0	0	0	0.0875	0	7	0	EYESYSDFER IPGIFELGISSQSDR SDLEVAHYK SGFSFGFK SLMLHYEFLQR EYESYSDFER IPGIFELGISSQSDR SDLEVAHYK SGFSFGFK SLMLHYEFLQR IPGIFELGISSQSDR		9	15	2	0	0	0
N/A	Complement component 8 subunit beta	A8K9M5_HUMAN	80Step_Domain_p320.0_to_400.0	320	400	80.0 AA STEP	80	2	3	10	0	0	0	0.0625	0.0008	5	0	DFGTHYITEAVLGGIYEYTLVMNK LPLEYSYGEYR DFGTHYITEAVLGGIYEYTLVMNK LPLEYSYGEYR LPLEYSYGEYR		3	6	3	0	0	0
N/A	Complement component 8 subunit beta	A8K9M5_HUMAN	80Step_Domain_p400.0_to_480.0	400	480	80.0 AA STEP	80	4	5	0	0	0	0	0.0375	0.1088	3	0	DTMVEDLVVLVR GGASEHITTLAYQELPTADLMQEWGDAVQYNPAIIK GILNEIKDR RDTMVEDLVVLVR DTMVEDLVVLVR GGASEHITTLAYQELPTADLMQEWGDAVQYNPAIIK RDTMVEDLVVLVR VEPLYELVTATDFAYSSTVR		5	10	0	0	0	0
N/A	Complement component 8 subunit beta	A8K9M5_HUMAN	80Step_Domain_p480.0_to_560.0	480	560	80.0 AA STEP	80	2	2	0	0	0	0	0.0125	1	1	0	QALEEFQK QALEEFQK VEPLYELVTATDFAYSSTVR		2	3	0	0	0	0
N/A	Complement component 8 subunit beta	A8K9M5_HUMAN	80Step_Domain_p560.0_to_591.0	560	591	80.0 AA STEP	31	0	0	0	0	0	0	0	1	0	0			0	0	0	0	0	0
N/A	Complement component 8 subunit beta	A8K9M5_HUMAN	100Step_Domain_p0_to_100	0	100	100.0 AA STEP	100	0	0	0	0	0	0	0	1	0	0			0	0	0	0	0	0
N/A	Complement component 8 subunit beta	A8K9M5_HUMAN	100Step_Domain_p100.0_to_200.0	100	200	100.0 AA STEP	100	0	0	0	0	0	0	0	1	0	0			0	0	0	0	0	0
N/A	Complement component 8 subunit beta	A8K9M5_HUMAN	100Step_Domain_p200.0_to_300.0	200	300	100.0 AA STEP	100	8	7	7	0	0	0	0.07	0	7	0	EYESYSDFER IPGIFELGISSQSDR KPYNVESYTPQTQGK SDLEVAHYK SGFSFGFK EYESYSDFER IPGIFELGISSQSDR KPYNVESYTPQTQGK SDLEVAHYK SGFSFGFK IPGIFELGISSQSDR		11	14	2	0	0	0
N/A	Complement component 8 subunit beta	A8K9M5_HUMAN	100Step_Domain_p300.0_to_400.0	300	400	100.0 AA STEP	100	5	5	10	0	0	0	0.07	0	7	0	DFGTHYITEAVLGGIYEYTLVMNK LPLEYSYGEYR SDLEVAHYK SLMLHYEFLQR DFGTHYITEAVLGGIYEYTLVMNK LPLEYSYGEYR SDLEVAHYK SLMLHYEFLQR LPLEYSYGEYR		6	9	3	0	0	0
N/A	Complement component 8 subunit beta	A8K9M5_HUMAN	100Step_Domain_p400.0_to_500.0	400	500	100.0 AA STEP	100	5	6	0	0	0	0	0.04	0.0096	4	0	DTMVEDLVVLVR GGASEHITTLAYQELPTADLMQEWGDAVQYNPAIIK GILNEIKDR QALEEFQK RDTMVEDLVVLVR DTMVEDLVVLVR GGASEHITTLAYQELPTADLMQEWGDAVQYNPAIIK QALEEFQK RDTMVEDLVVLVR VEPLYELVTATDFAYSSTVR		7	11	0	0	0	0
N/A	Complement component 8 subunit beta	A8K9M5_HUMAN	100Step_Domain_p500.0_to_591.0	500	591	100.0 AA STEP	91	0	0	0	0	0	0	0	1	0	0			0	0	0	0	0	0
C8B	Complement component C8 beta chain	CO8B_HUMAN	TSP type-1 1	64	117	DOMAINS	53	0	0	0	0	0	0	0	1	0	0			0	0	0	0	0	0
C8B	Complement component C8 beta chain	CO8B_HUMAN	LDL-receptor class A	120	157	DOMAINS	37	0	0	0	0	0	0	0	1	0	0			0	0	0	0	0	0
C8B	Complement component C8 beta chain	CO8B_HUMAN	MACPF	158	504	DOMAINS	346	17	17	17	0	0	0	0.0491329	0	17	0	DFGTHYITEAVLGGIYEYTLVMNK DTMVEDLVVLVR EYESYSDFER GGASEHITTLAYQELPTADLMQEWGDAVQYNPAIIK GILNEIKDR IPGIFELGISSQSDR KPYNVESYTPQTQGK LPLEYSYGEYR QALEEFQK RDTMVEDLVVLVR SDLEVAHYK SGFSFGFK SLMLHYEFLQR DFGTHYITEAVLGGIYEYTLVMNK DTMVEDLVVLVR EYESYSDFER GGASEHITTLAYQELPTADLMQEWGDAVQYNPAIIK IPGIFELGISSQSDR KPYNVESYTPQTQGK LPLEYSYGEYR QALEEFQK RDTMVEDLVVLVR SDLEVAHYK SGFSFGFK SLMLHYEFLQR VEPLYELVTATDFAYSSTVR …		22	33	5	0	0	0
C8B	Complement component C8 beta chain	CO8B_HUMAN	EGF-like	505	535	DOMAINS	30	0	0	0	0	0	0	0	1	0	0			0	0	0	0	0	0
C8B	Complement component C8 beta chain	CO8B_HUMAN	TSP type-1 2	545	591	DOMAINS	46	0	0	0	0	0	0	0	1	0	0			0	0	0	0	0	0
APOA4	Apolipoprotein A-IV	APOA4_HUMAN	50Step_Domain_p100.0_to_150.0	100	150	50.0 AA STEP	50	9	5	3	0	0	0	0.12	0.0136	6	0	EEIGKELEELR LEPYADQLR LKEEIGKELEELR LLPHANEVSQK EEIGKELEELR LEPYADQLR LKEEIGKELEELR EEIGKELEELR		17	6	1	0	0	0
C5	Complement C5	CO5_HUMAN	50Step_Domain_p50.0_to_100.0	50	100	50.0 AA STEP	50	4	7	0	0	0	0	0.08	0.0136	4	0	FQNSAILTIQPK FSYSSGHVHLSSENK QLPGGQNPVSYVYLEVVSK FQNSAILTIQPK FSYSSGHVHLSSENK QLPGGQNPVSYVYLEVVSK		8	6	0	0	0	0
PON1	Serum paraoxonase/arylesterase 1	PON1_HUMAN	50Step_Domain_p300.0_to_350.0	300	350	50.0 AA STEP	50	6	4	0	0	0	0	0.06	0.0136	3	0	IFFYDSENPPASEVLR IQNILTEEPK IFFYDSENPPASEVLR IQNILTEEPK		12	7	0	0	0	0
RNASE4	Ribonuclease 4	RNAS4_HUMAN	50Step_Domain_p0_to_50	0	50	50.0 AA STEP	50	0	0	2	23	14	28	-0.42	0.0138	1	22	QHVHPEETGGSDR	QHVHPEETGGSDR QHVHPEETGGSDR QHVHPEETGGSDR	0	0	1	27	27	31
RAB1	Epididymis secretory sperm binding protein	Q53XB4_HUMAN	50Step_Domain_p0_to_50	0	50	50.0 AA STEP	50	0	0	2	23	14	28	-0.42	0.0138	1	22	QHVHPEETGGSDR	QHVHPEETGGSDR QHVHPEETGGSDR QHVHPEETGGSDR	0	0	1	27	27	31
HPX	Hemopexin	HEMO_HUMAN	50Step_Domain_p400.0_to_450.0	400	450	50.0 AA STEP	50	8	5	19	0	0	0	0.22	0.014	11	0	SGAQATWTELPWPHEK SLGPNSCSANGPGLYLIHGPNLYCYSDVEK SGAQATWTELPWPHEK SGAQATWTELPWPHEK		15	6	6	0	0	0
N/A	Protein S100	B2R5H0_HUMAN	50Step_Domain_p0_to_50	0	50	50.0 AA STEP	50	0	0	0	2	2	0	-0.02	0.0141	0	1		DGYNYTLSK ISSPTETER DGYNYTLSK ISSPTETER	0	0	0	3	3	0
S100A11	Protein S100-A11	S10AB_HUMAN	50Step_Domain_p0_to_50	0	50	50.0 AA STEP	50	0	0	0	2	2	0	-0.02	0.0141	0	1		DGYNYTLSK ISSPTETER DGYNYTLSK ISSPTETER	0	0	0	3	3	0
HEL-S-43	Protein S100	V9HWH9_HUMAN	50Step_Domain_p0_to_50	0	50	50.0 AA STEP	50	0	0	0	2	2	0	-0.02	0.0141	0	1		DGYNYTLSK ISSPTETER DGYNYTLSK ISSPTETER	0	0	0	3	3	0
PDGFRL	Platelet-derived growth factor receptor-like protein	PGFRL_HUMAN	50Step_Domain_p150.0_to_200.0	150	200	50.0 AA STEP	50	4	3	5	5	5	6	-0.02	0.0144	4	5	GELFVPSPSYFDVVYLNPDR TGSTYIFFTEK GELFVPSPSYFDVVYLNPDR TGSTYIFFTEK GELFVPSPSYFDVVYLNPDR TGSTYIFFTEK	GELFVPSPSYFDVVYLNPDR TGSTYIFFTEK GELFVPSPSYFDVVYLNPDR GELFVPSPSYFDVVYLNPDR TGSTYIFFTEK	4	4	6	5	3	6
N/A	MS-C1 light chain variable region	A0A109PW33_HUMAN	50Step_Domain_p0_to_50	0	50	50.0 AA STEP	50	9	9	0	0	0	0	0.12	0.0147	6	0	DIQMTQSPSSLSASVGDR LLIYDASNLK DIQMTQSPSSLSASVGDR LLIYDASNLKTGVPSR		18	15	0	0	0	0
EMILIN1	EMILIN-1	EMIL1_HUMAN	50Step_Domain_p550.0_to_600.0	550	600	50.0 AA STEP	50	1	2	2	5	4	3	-0.04	0.0147	2	4	VDAQDETAAEFTLR VDAQDETAAEFTLR VDAQDETAAEFTLR	VDAQDETAAEFTLR VDAQDETAAEFTLR VDAQDETAAEFTLR	1	1	2	5	5	4
C8B	Complement component C8 beta chain	CO8B_HUMAN	80Step_Domain_p0_to_80	0	80	80.0 AA STEP	80	0	0	0	0	0	0	0	1	0	0			0	0	0	0	0	0
C8B	Complement component C8 beta chain	CO8B_HUMAN	80Step_Domain_p80.0_to_160.0	80	160	80.0 AA STEP	80	0	0	0	0	0	0	0	1	0	0			0	0	0	0	0	0
C8B	Complement component C8 beta chain	CO8B_HUMAN	80Step_Domain_p160.0_to_240.0	160	240	80.0 AA STEP	80	4	2	0	0	0	0	0.025	0.7304	2	0	EYESYSDFER KPYNVESYTPQTQGK EYESYSDFER KPYNVESYTPQTQGK		5	3	0	0	0	0
C8B	Complement component C8 beta chain	CO8B_HUMAN	80Step_Domain_p240.0_to_320.0	240	320	80.0 AA STEP	80	7	8	7	0	0	0	0.0875	0	7	0	EYESYSDFER IPGIFELGISSQSDR SDLEVAHYK SGFSFGFK SLMLHYEFLQR EYESYSDFER IPGIFELGISSQSDR SDLEVAHYK SGFSFGFK SLMLHYEFLQR IPGIFELGISSQSDR		9	15	2	0	0	0
C8B	Complement component C8 beta chain	CO8B_HUMAN	80Step_Domain_p320.0_to_400.0	320	400	80.0 AA STEP	80	2	3	10	0	0	0	0.0625	0.0008	5	0	DFGTHYITEAVLGGIYEYTLVMNK LPLEYSYGEYR DFGTHYITEAVLGGIYEYTLVMNK LPLEYSYGEYR LPLEYSYGEYR		3	6	3	0	0	0
C8B	Complement component C8 beta chain	CO8B_HUMAN	80Step_Domain_p400.0_to_480.0	400	480	80.0 AA STEP	80	4	5	0	0	0	0	0.0375	0.1088	3	0	DTMVEDLVVLVR GGASEHITTLAYQELPTADLMQEWGDAVQYNPAIIK GILNEIKDR RDTMVEDLVVLVR DTMVEDLVVLVR GGASEHITTLAYQELPTADLMQEWGDAVQYNPAIIK RDTMVEDLVVLVR VEPLYELVTATDFAYSSTVR		5	10	0	0	0	0
C8B	Complement component C8 beta chain	CO8B_HUMAN	80Step_Domain_p480.0_to_560.0	480	560	80.0 AA STEP	80	2	2	0	0	0	0	0.0125	1	1	0	QALEEFQK QALEEFQK VEPLYELVTATDFAYSSTVR		2	3	0	0	0	0
C8B	Complement component C8 beta chain	CO8B_HUMAN	80Step_Domain_p560.0_to_591.0	560	591	80.0 AA STEP	31	0	0	0	0	0	0	0	1	0	0			0	0	0	0	0	0
C8B	Complement component C8 beta chain	CO8B_HUMAN	100Step_Domain_p0_to_100	0	100	100.0 AA STEP	100	0	0	0	0	0	0	0	1	0	0			0	0	0	0	0	0
C8B	Complement component C8 beta chain	CO8B_HUMAN	100Step_Domain_p100.0_to_200.0	100	200	100.0 AA STEP	100	0	0	0	0	0	0	0	1	0	0			0	0	0	0	0	0
C8B	Complement component C8 beta chain	CO8B_HUMAN	100Step_Domain_p200.0_to_300.0	200	300	100.0 AA STEP	100	8	7	7	0	0	0	0.07	0	7	0	EYESYSDFER IPGIFELGISSQSDR KPYNVESYTPQTQGK SDLEVAHYK SGFSFGFK EYESYSDFER IPGIFELGISSQSDR KPYNVESYTPQTQGK SDLEVAHYK SGFSFGFK IPGIFELGISSQSDR		11	14	2	0	0	0
C8B	Complement component C8 beta chain	CO8B_HUMAN	100Step_Domain_p300.0_to_400.0	300	400	100.0 AA STEP	100	5	5	10	0	0	0	0.07	0	7	0	DFGTHYITEAVLGGIYEYTLVMNK LPLEYSYGEYR SDLEVAHYK SLMLHYEFLQR DFGTHYITEAVLGGIYEYTLVMNK LPLEYSYGEYR SDLEVAHYK SLMLHYEFLQR LPLEYSYGEYR		6	9	3	0	0	0
C8B	Complement component C8 beta chain	CO8B_HUMAN	100Step_Domain_p400.0_to_500.0	400	500	100.0 AA STEP	100	5	6	0	0	0	0	0.04	0.0096	4	0	DTMVEDLVVLVR GGASEHITTLAYQELPTADLMQEWGDAVQYNPAIIK GILNEIKDR QALEEFQK RDTMVEDLVVLVR DTMVEDLVVLVR GGASEHITTLAYQELPTADLMQEWGDAVQYNPAIIK QALEEFQK RDTMVEDLVVLVR VEPLYELVTATDFAYSSTVR		7	11	0	0	0	0
C8B	Complement component C8 beta chain	CO8B_HUMAN	100Step_Domain_p500.0_to_591.0	500	591	100.0 AA STEP	91	0	0	0	0	0	0	0	1	0	0			0	0	0	0	0	0
EMILIN1	EMILIN-1	EMIL1_HUMAN	50Step_Domain_p850.0_to_900.0	850	900	50.0 AA STEP	50	5	4	4	2	2	2	0.04	0.0147	4	2	SEPGTVPFDR SEPGTVPFDR VLLNDGGYYDPETGVFTAPLAGR SEPGTVPFDR VLLNDGGYYDPETGVFTAPLAGR	SEPGTVPFDR VLLNDGGYYDPETGVFTAPLAGR SEPGTVPFDR VLLNDGGYYDPETGVFTAPLAGR SEPGTVPFDR VLLNDGGYYDPETGVFTAPLAGR	4	3	3	2	3	2
N/A	Angiotensin 1-10	Q59EP2_HUMAN	50Step_Domain_p150.0_to_200.0	150	200	50.0 AA STEP	50	2	2	5	0	0	2	0.04	0.015	3	1	VLSALQAVQGLLVAQGR LQAILGVPWK VLSALQAVQGLLVAQGR LQAILGVPWK VLSALQAVQGLLVAQGR	VLSALQAVQGLLVAQGR	2	3	4	0	0	1
FGG	Fibrinogen gamma chain	FIBG_HUMAN	50Step_Domain_p150.0_to_200.0	150	200	50.0 AA STEP	50	10	9	25	0	0	0	0.3	0.015	15	0	ANQQFLVYCEIDGSGNGWTVFQK DTVQIHDITGK QSGLYFIKPLK ANQQFLVYCEIDGSGNGWTVFQK DTVQIHDITGK QSGLYFIKPLK DTVQIHDITGK		19	5	1	0	0	0
SMOC1	SPARC-related modular calcium-binding protein 1	SMOC1_HUMAN	50Step_Domain_p250.0_to_300.0	250	300	50.0 AA STEP	50	5	0	5	7	6	7	-0.08	0.0153	3	7	TTEADDPFKDR TTEADDPFK TTEADDPFKDR	TTEADDPFK TTEADDPFKDR TTEADDPFKDR TTEADDPFK TTEADDPFKDR	3	0	7	9	7	9
SMOC1	SPARC-related modular calcium-binding protein 1	SMOC1_HUMAN	50Step_Domain_p300.0_to_350.0	300	350	50.0 AA STEP	50	6	4	8	9	8	11	-0.06	0.0153	6	9	FSEPDPSHTLEER TTEADDPFKDR FSEPDPSHTLEER FSEPDPSHTLEER TTEADDPFK TTEADDPFKDR	FSEPDPSHTLEER TTEADDPFK TTEADDPFKDR FSEPDPSHTLEER TTEADDPFKDR FSEPDPSHTLEER TTEADDPFK TTEADDPFKDR	4	3	10	13	9	14
SHBG	Sex hormone-binding globulin	SHBG_HUMAN	50Step_Domain_p50.0_to_100.0	50	100	50.0 AA STEP	50	3	3	0	0	0	0	0.04	0.0153	2	0	DDWFMLGLR TWDPEGVIFYGDTNPK TWDPEGVIFYGDTNPK		6	2	0	0	0	0
CALR	Calreticulin	CALR_HUMAN	50Step_Domain_p200.0_to_250.0	200	250	50.0 AA STEP	50	0	1	2	0	0	0	0.02	0.0153	1	0	IKDPDASKPEDWDER IKDPDASKPEDWDER		0	1	3	0	0	0
HEL-S-99n	Calreticulin	V9HW88_HUMAN	50Step_Domain_p200.0_to_250.0	200	250	50.0 AA STEP	50	0	1	2	0	0	0	0.02	0.0153	1	0	IKDPDASKPEDWDER IKDPDASKPEDWDER		0	1	3	0	0	0
HSPA5	Endoplasmic reticulum chaperone BiP	BIP_HUMAN	50Step_Domain_p200.0_to_250.0	200	250	50.0 AA STEP	50	1	1	4	4	6	6	-0.06	0.0154	2	5	IINEPTAAAIAYGLDK IINEPTAAAIAYGLDK IINEPTAAAIAYGLDK	IINEPTAAAIAYGLDK IINEPTAAAIAYGLDK IINEPTAAAIAYGLDK	1	1	5	4	5	5
HEL-S-89n	78 kDa glucose-regulated protein	V9HWB4_HUMAN	50Step_Domain_p200.0_to_250.0	200	250	50.0 AA STEP	50	1	1	4	4	6	6	-0.06	0.0154	2	5	IINEPTAAAIAYGLDK IINEPTAAAIAYGLDK IINEPTAAAIAYGLDK	IINEPTAAAIAYGLDK IINEPTAAAIAYGLDK IINEPTAAAIAYGLDK	1	1	5	4	5	5
N/A	Complement component 8 subunit beta	A8K9M5_HUMAN	50Step_Domain_p400.0_to_450.0	400	450	50.0 AA STEP	50	4	4	0	0	0	0	0.06	0.0156	3	0	DTMVEDLVVLVR GGASEHITTLAYQELPTADLMQEWGDAVQYNPAIIK GILNEIKDR RDTMVEDLVVLVR DTMVEDLVVLVR GGASEHITTLAYQELPTADLMQEWGDAVQYNPAIIK RDTMVEDLVVLVR		5	8	0	0	0	0
N/A	Complement component 8 subunit beta	B7Z555_HUMAN	80Step_Domain_p0_to_80	0	80	80.0 AA STEP	80	0	0	0	0	0	0	0	1	0	0			0	0	0	0	0	0
N/A	Complement component 8 subunit beta	B7Z555_HUMAN	80Step_Domain_p80.0_to_160.0	80	160	80.0 AA STEP	80	2	1	0	0	0	0	0.0125	1	1	0	KPYNVESYTPQTQGK KPYNVESYTPQTQGK		3	1	0	0	0	0
N/A	Complement component 8 subunit beta	B7Z555_HUMAN	80Step_Domain_p160.0_to_240.0	160	240	80.0 AA STEP	80	7	7	7	0	0	0	0.0875	0	7	0	EYESYSDFER IPGIFELGISSQSDR KPYNVESYTPQTQGK SGFSFGFK EYESYSDFER IPGIFELGISSQSDR KPYNVESYTPQTQGK SGFSFGFK IPGIFELGISSQSDR		9	13	2	0	0	0
N/A	Complement component 8 subunit beta	B7Z555_HUMAN	80Step_Domain_p240.0_to_320.0	240	320	80.0 AA STEP	80	5	5	10	0	0	0	0.0875	0	7	0	DFGTHYITEAVLGGIYEYTLVMNK LPLEYSYGEYR SDLEVAHYK SLMLHYEFLQR DFGTHYITEAVLGGIYEYTLVMNK LPLEYSYGEYR SDLEVAHYK SLMLHYEFLQR LPLEYSYGEYR		6	9	3	0	0	0
N/A	Complement component 8 subunit beta	B7Z555_HUMAN	80Step_Domain_p320.0_to_400.0	320	400	80.0 AA STEP	80	4	4	0	0	0	0	0.0375	0.0427	3	0	DTMVEDLVVLVR GGASEHITTLAYQELPTADLMQEWGDAVQYNPAIIK GILNEIKDR RDTMVEDLVVLVR DTMVEDLVVLVR GGASEHITTLAYQELPTADLMQEWGDAVQYNPAIIK RDTMVEDLVVLVR		5	8	0	0	0	0
N/A	Complement component 8 subunit beta	B7Z555_HUMAN	80Step_Domain_p400.0_to_480.0	400	480	80.0 AA STEP	80	2	3	0	0	0	0	0.025	0.5215	2	0	GGASEHITTLAYQELPTADLMQEWGDAVQYNPAIIK QALEEFQK GGASEHITTLAYQELPTADLMQEWGDAVQYNPAIIK QALEEFQK VEPLYELVTATDFAYSSTVR		3	5	0	0	0	0
N/A	Complement component 8 subunit beta	B7Z555_HUMAN	80Step_Domain_p480.0_to_539.0	480	539	80.0 AA STEP	59	0	0	0	0	0	0	0	1	0	0			0	0	0	0	0	0
N/A	Complement component 8 subunit beta	B7Z555_HUMAN	100Step_Domain_p0_to_100	0	100	100.0 AA STEP	100	0	0	0	0	0	0	0	1	0	0			0	0	0	0	0	0
N/A	Complement component 8 subunit beta	B7Z555_HUMAN	100Step_Domain_p100.0_to_200.0	100	200	100.0 AA STEP	100	5	2	0	0	0	0	0.02	0.8202	2	0	EYESYSDFER KPYNVESYTPQTQGK SGFSFGFK EYESYSDFER KPYNVESYTPQTQGK SGFSFGFK		6	4	0	0	0	0
N/A	Complement component 8 subunit beta	B7Z555_HUMAN	100Step_Domain_p200.0_to_300.0	200	300	100.0 AA STEP	100	8	10	17	0	0	0	0.12	0	12	0	DFGTHYITEAVLGGIYEYTLVMNK IPGIFELGISSQSDR LPLEYSYGEYR SDLEVAHYK SGFSFGFK SLMLHYEFLQR DFGTHYITEAVLGGIYEYTLVMNK IPGIFELGISSQSDR LPLEYSYGEYR SDLEVAHYK SGFSFGFK SLMLHYEFLQR IPGIFELGISSQSDR LPLEYSYGEYR		10	19	5	0	0	0
N/A	Complement component 8 subunit beta	B7Z555_HUMAN	100Step_Domain_p300.0_to_400.0	300	400	100.0 AA STEP	100	5	6	0	0	0	0	0.04	0.141	4	0	DFGTHYITEAVLGGIYEYTLVMNK DTMVEDLVVLVR GGASEHITTLAYQELPTADLMQEWGDAVQYNPAIIK GILNEIKDR RDTMVEDLVVLVR DFGTHYITEAVLGGIYEYTLVMNK DTMVEDLVVLVR GGASEHITTLAYQELPTADLMQEWGDAVQYNPAIIK RDTMVEDLVVLVR		6	11	0	0	0	0
N/A	Complement component 8 subunit beta	B7Z555_HUMAN	100Step_Domain_p400.0_to_500.0	400	500	100.0 AA STEP	100	2	3	0	0	0	0	0.02	1	2	0	GGASEHITTLAYQELPTADLMQEWGDAVQYNPAIIK QALEEFQK GGASEHITTLAYQELPTADLMQEWGDAVQYNPAIIK QALEEFQK VEPLYELVTATDFAYSSTVR		3	5	0	0	0	0
N/A	Complement component 8 subunit beta	B7Z555_HUMAN	100Step_Domain_p500.0_to_539.0	500	539	100.0 AA STEP	39	0	0	0	0	0	0	0	1	0	0			0	0	0	0	0	0
C8B	Complement component C8 beta chain	CO8B_HUMAN	50Step_Domain_p400.0_to_450.0	400	450	50.0 AA STEP	50	4	4	0	0	0	0	0.06	0.0156	3	0	DTMVEDLVVLVR GGASEHITTLAYQELPTADLMQEWGDAVQYNPAIIK GILNEIKDR RDTMVEDLVVLVR DTMVEDLVVLVR GGASEHITTLAYQELPTADLMQEWGDAVQYNPAIIK RDTMVEDLVVLVR		5	8	0	0	0	0
BMP3	Bone morphogenetic protein 3	BMP3_HUMAN	50Step_Domain_p0_to_50	0	50	50.0 AA STEP	50	0	0	0	2	2	0	-0.02	0.016	0	1		TAGGGPDSELQPQDK TAGGGPDSELQPQDK	0	0	0	2	3	0
BMP3	Bone morphogenetic protein 3	BMP3_HUMAN	50Step_Domain_p50.0_to_100.0	50	100	50.0 AA STEP	50	0	0	0	2	2	0	-0.02	0.016	0	1		TAGGGPDSELQPQDK TAGGGPDSELQPQDK	0	0	0	2	3	0
FLNC	Filamin-C	FLNC_HUMAN	50Step_Domain_p0_to_50	0	50	50.0 AA STEP	50	0	0	0	1	0	0	0	0.0165	0	0		DLAEDAPWK	0	0	0	1	0	0
FLNC	Filamin-C	FLNC_HUMAN	50Step_Domain_p1500.0_to_1550.0	1500	1550	50.0 AA STEP	50	0	0	0	1	0	0	0	0.0165	0	0		YADQEVPR	0	0	0	1	0	0
FLNC	Filamin-C	FLNC_HUMAN	50Step_Domain_p1950.0_to_2000.0	1950	2000	50.0 AA STEP	50	0	0	0	1	0	0	0	0.0165	0	0		ITESDLSQLTASIR	0	0	0	1	0	0
FLNC	Filamin-C	FLNC_HUMAN	50Step_Domain_p2250.0_to_2300.0	2250	2300	50.0 AA STEP	50	0	0	0	1	0	0	0	0.0165	0	0		VEAAEIVEGEDSAYSVR	0	0	0	1	0	0
ORM1	Alpha-1-acid glycoprotein 1	A1AG1_HUMAN	50Step_Domain_p100.0_to_150.0	100	150	50.0 AA STEP	50	40	39	26	17	0	26	0.42	0.0165	35	14	NWGLSVYADKPETTK TYMLAFDVNDEK YVGGQEHFAHLLILR NWGLSVYADKPETTK TYMLAFDVNDEK YVGGQEHFAHLLILR NWGLSVYADKPETTK TYMLAFDVNDEK YVGGQEHFAHLLILR	TYMLAFDVNDEK TYMLAFDVNDEK	80	36	7	1	0	1
HEL-S-153w	Alpha-1-acid glycoprotein	V9HWF6_HUMAN	50Step_Domain_p100.0_to_150.0	100	150	50.0 AA STEP	50	40	39	26	17	0	26	0.42	0.0165	35	14	NWGLSVYADKPETTK TYMLAFDVNDEK YVGGQEHFAHLLILR NWGLSVYADKPETTK TYMLAFDVNDEK YVGGQEHFAHLLILR NWGLSVYADKPETTK TYMLAFDVNDEK YVGGQEHFAHLLILR	TYMLAFDVNDEK TYMLAFDVNDEK	80	36	7	1	0	1
CRP	C-reactive protein	CRP_HUMAN	50Step_Domain_p50.0_to_100.0	50	100	50.0 AA STEP	50	4	3	0	0	0	0	0.04	0.0165	2	0	GYSIFSYATK RQDNEILIFWSK QDNEILIFWSK		8	1	0	0	0	0
HEL112	40S ribosomal protein S27a	B2RDW1_HUMAN	50Step_Domain_p0_to_50	0	50	50.0 AA STEP	50	0	2	0	2	2	3	-0.02	0.0168	1	2	TITLEVEPSDTIENVK	TITLEVEPSDTIENVK TITLEVEPSDTIENVK TITLEVEPSDTIENVK	0	1	0	2	2	5
N/A	Complement component 8 subunit beta	B7ZA94_HUMAN	80Step_Domain_p0_to_80	0	80	80.0 AA STEP	80	0	0	0	0	0	0	0	1	0	0			0	0	0	0	0	0
N/A	Complement component 8 subunit beta	B7ZA94_HUMAN	80Step_Domain_p80.0_to_160.0	80	160	80.0 AA STEP	80	2	1	0	0	0	0	0.0125	1	1	0	KPYNVESYTPQTQGK KPYNVESYTPQTQGK		3	1	0	0	0	0
N/A	Complement component 8 subunit beta	B7ZA94_HUMAN	80Step_Domain_p160.0_to_240.0	160	240	80.0 AA STEP	80	7	7	7	0	0	0	0.0875	0	7	0	EYESYSDFER IPGIFELGISSQSDR KPYNVESYTPQTQGK SGFSFGFK EYESYSDFER IPGIFELGISSQSDR KPYNVESYTPQTQGK SGFSFGFK IPGIFELGISSQSDR		9	13	2	0	0	0
N/A	Complement component 8 subunit beta	B7ZA94_HUMAN	80Step_Domain_p240.0_to_320.0	240	320	80.0 AA STEP	80	5	5	10	0	0	0	0.0875	0	7	0	DFGTHYITEAVLGGIYEYTLVMNK LPLEYSYGEYR SDLEVAHYK SLMLHYEFLQR DFGTHYITEAVLGGIYEYTLVMNK LPLEYSYGEYR SDLEVAHYK SLMLHYEFLQR LPLEYSYGEYR		6	9	3	0	0	0
N/A	Complement component 8 subunit beta	B7ZA94_HUMAN	80Step_Domain_p320.0_to_400.0	320	400	80.0 AA STEP	80	4	4	0	0	0	0	0.0375	0.0427	3	0	DTMVEDLVVLVR GGASEHITTLAYQELPTADLMQEWGDAVQYNPAIIK GILNEIKDR RDTMVEDLVVLVR DTMVEDLVVLVR GGASEHITTLAYQELPTADLMQEWGDAVQYNPAIIK RDTMVEDLVVLVR		5	8	0	0	0	0
N/A	Complement component 8 subunit beta	B7ZA94_HUMAN	80Step_Domain_p400.0_to_480.0	400	480	80.0 AA STEP	80	2	3	0	0	0	0	0.025	0.5215	2	0	GGASEHITTLAYQELPTADLMQEWGDAVQYNPAIIK QALEEFQK GGASEHITTLAYQELPTADLMQEWGDAVQYNPAIIK QALEEFQK VEPLYELVTATDFAYSSTVR		3	5	0	0	0	0
N/A	Complement component 8 subunit beta	B7ZA94_HUMAN	80Step_Domain_p480.0_to_539.0	480	539	80.0 AA STEP	59	0	0	0	0	0	0	0	1	0	0			0	0	0	0	0	0
N/A	Complement component 8 subunit beta	B7ZA94_HUMAN	100Step_Domain_p0_to_100	0	100	100.0 AA STEP	100	0	0	0	0	0	0	0	1	0	0			0	0	0	0	0	0
N/A	Complement component 8 subunit beta	B7ZA94_HUMAN	100Step_Domain_p100.0_to_200.0	100	200	100.0 AA STEP	100	5	2	0	0	0	0	0.02	0.8202	2	0	EYESYSDFER KPYNVESYTPQTQGK SGFSFGFK EYESYSDFER KPYNVESYTPQTQGK SGFSFGFK		6	4	0	0	0	0
N/A	Complement component 8 subunit beta	B7ZA94_HUMAN	100Step_Domain_p200.0_to_300.0	200	300	100.0 AA STEP	100	8	10	17	0	0	0	0.12	0	12	0	DFGTHYITEAVLGGIYEYTLVMNK IPGIFELGISSQSDR LPLEYSYGEYR SDLEVAHYK SGFSFGFK SLMLHYEFLQR DFGTHYITEAVLGGIYEYTLVMNK IPGIFELGISSQSDR LPLEYSYGEYR SDLEVAHYK SGFSFGFK SLMLHYEFLQR IPGIFELGISSQSDR LPLEYSYGEYR		10	19	5	0	0	0
N/A	Complement component 8 subunit beta	B7ZA94_HUMAN	100Step_Domain_p300.0_to_400.0	300	400	100.0 AA STEP	100	5	6	0	0	0	0	0.04	0.141	4	0	DFGTHYITEAVLGGIYEYTLVMNK DTMVEDLVVLVR GGASEHITTLAYQELPTADLMQEWGDAVQYNPAIIK GILNEIKDR RDTMVEDLVVLVR DFGTHYITEAVLGGIYEYTLVMNK DTMVEDLVVLVR GGASEHITTLAYQELPTADLMQEWGDAVQYNPAIIK RDTMVEDLVVLVR		6	11	0	0	0	0
N/A	Complement component 8 subunit beta	B7ZA94_HUMAN	100Step_Domain_p400.0_to_500.0	400	500	100.0 AA STEP	100	2	3	0	0	0	0	0.02	1	2	0	GGASEHITTLAYQELPTADLMQEWGDAVQYNPAIIK QALEEFQK GGASEHITTLAYQELPTADLMQEWGDAVQYNPAIIK QALEEFQK VEPLYELVTATDFAYSSTVR		3	5	0	0	0	0
N/A	Complement component 8 subunit beta	B7ZA94_HUMAN	100Step_Domain_p500.0_to_539.0	500	539	100.0 AA STEP	39	0	0	0	0	0	0	0	1	0	0			0	0	0	0	0	0
C8A	Complement component C8 alpha chain	CO8A_HUMAN	TSP type-1 1	38	91	DOMAINS	53	0	0	0	0	0	0	0	1	0	0			0	0	0	0	0	0
C8A	Complement component C8 alpha chain	CO8A_HUMAN	LDL-receptor class A	94	132	DOMAINS	38	0	0	0	0	0	0	0	1	0	0			0	0	0	0	0	0
C8A	Complement component C8 alpha chain	CO8A_HUMAN	MACPF	135	498	DOMAINS	363	8	8	0	0	0	0	0.0137741	0.001	5	0	ALDQYLMEFNACR AMAVEDIISR HTSLGPLEAK MESLGITSR YNPVVIDFEMQPIHEVLR AMAVEDIISR MESLGITSR YHFEALADTGISSEFYDNANDLLSK YNPVVIDFEMQPIHEVLR		16	16	0	0	0	0
C8A	Complement component C8 alpha chain	CO8A_HUMAN	EGF-like	499	529	DOMAINS	30	0	0	0	0	0	0	0	1	0	0			0	0	0	0	0	0
C8A	Complement component C8 alpha chain	CO8A_HUMAN	TSP type-1 2	539	583	DOMAINS	44	0	0	0	0	0	0	0	1	0	0			0	0	0	0	0	0
RPS27A	Ubiquitin-40S ribosomal protein S27a	RS27A_HUMAN	50Step_Domain_p0_to_50	0	50	50.0 AA STEP	50	0	2	0	2	2	3	-0.02	0.0168	1	2	TITLEVEPSDTIENVK	TITLEVEPSDTIENVK TITLEVEPSDTIENVK TITLEVEPSDTIENVK	0	1	0	2	2	5
KLKB1	Plasma kallikrein	KLKB1_HUMAN	50Step_Domain_p600.0_to_638.0	600	638	50.0 AA STEP	38	1	3	0	0	0	0	0.0263158	0.0169	1	0	VAEYMDWILEK VAEYMDWILEK		2	4	0	0	0	0
C3	Complement C3	CO3_HUMAN	50Step_Domain_p300.0_to_350.0	300	350	50.0 AA STEP	50	18	22	24	84	46	50	-0.78	0.017	21	60	IPIEDGSGEVVLSR RIPIEDGSGEVVLSR SGIPIVTSPYQIHFTK VLLDGVQNPR IPIEDGSGEVVLSR RIPIEDGSGEVVLSR SGIPIVTSPYQIHFTK SLYVSATVILHSGSDMVQAER VLLDGVQNPR IPIEDGSGEVVLSR SGIPIVTSPYQIHFTK VLLDGVQNPR	IPIEDGSGEVVLSR VLLDGVQNPR IPIEDGSGEVVLSR VLLDGVQNPR IPIEDGSGEVVLSR	36	36	6	2	2	1
HEL-S-62p	C3-beta-c	V9HWA9_HUMAN	50Step_Domain_p300.0_to_350.0	300	350	50.0 AA STEP	50	18	22	24	84	46	50	-0.78	0.017	21	60	IPIEDGSGEVVLSR RIPIEDGSGEVVLSR SGIPIVTSPYQIHFTK VLLDGVQNPR IPIEDGSGEVVLSR RIPIEDGSGEVVLSR SGIPIVTSPYQIHFTK SLYVSATVILHSGSDMVQAER VLLDGVQNPR IPIEDGSGEVVLSR SGIPIVTSPYQIHFTK VLLDGVQNPR	IPIEDGSGEVVLSR VLLDGVQNPR IPIEDGSGEVVLSR VLLDGVQNPR IPIEDGSGEVVLSR	36	36	6	2	2	1
KNG1	Kininogen 1; isoform CRA_a	D3DNU8_HUMAN	50Step_Domain_p200.0_to_250.0	200	250	50.0 AA STEP	50	4	5	5	0	0	0	0.1	0.0171	5	0	IASFSQNCDIYPGK IASFSQNCDIYPGKDFVQPPTK ITYSIVQTNCSK SLWNGDTGECTDNAYIDIQLR IASFSQNCDIYPGK SLWNGDTGECTDNAYIDIQLR SLWNGDTGECTDNAYIDIQLR		8	9	1	0	0	0
HEXA	Beta-N-acetylhexosaminidase	Q9BVJ8_HUMAN	50Step_Domain_p250.0_to_300.0	250	300	50.0 AA STEP	50	2	1	2	0	0	0	0.04	0.0171	2	0	IQPDTIIQVWR GYVVWQEVFDNK GYVVWQEVFDNK IQPDTIIQVWR		1	1	4	0	0	0
SMOC2	SPARC-related modular calcium-binding protein 2	SMOC2_HUMAN	50Step_Domain_p150.0_to_200.0	150	200	50.0 AA STEP	50	6	4	4	7	6	6	-0.02	0.0171	5	6	TDDAAAPALETQPQGDEEDIASR YPTLWTEQVK TDDAAAPALETQPQGDEEDIASR YPTLWTEQVK TDDAAAPALETQPQGDEEDIASR YPTLWTEQVK	TDDAAAPALETQPQGDEEDIASR YPTLWTEQVK TDDAAAPALETQPQGDEEDIASR YPTLWTEQVK TDDAAAPALETQPQGDEEDIASR YPTLWTEQVK	4	6	4	4	6	8
FBN1	Fibrillin-1	FBN1_HUMAN	50Step_Domain_p2450.0_to_2500.0	2450	2500	50.0 AA STEP	50	0	0	1	1	1	1	-0.02	0.0174	0	1	GYILQEDGR	GYILQEDGR GYILQEDGR GYILQEDGR	0	0	1	2	1	2
N/A	C3/C5 convertase	A0A1U9X8X9_HUMAN	50Step_Domain_p250.0_to_300.0	250	300	50.0 AA STEP	50	2	2	0	0	0	0	0.02	0.0176	1	0	ESASLMVDR ESASLMVDR		3	2	0	0	0	0
N/A	C3/C5 convertase	A0A1U9X8X9_HUMAN	50Step_Domain_p300.0_to_350.0	300	350	50.0 AA STEP	50	3	1	0	0	0	0	0.02	0.0176	1	0	DMTEVISSLENANYK VLMSVLNDNSR DMTEVISSLENANYK		6	1	0	0	0	0
N/A	C3/C5 convertase	A0A1U9X8X9_HUMAN	50Step_Domain_p650.0_to_700.0	650	700	50.0 AA STEP	50	2	2	0	0	0	0	0.02	0.0176	1	0	GESGGAVFLER GESGGAVFLER		3	2	0	0	0	0
N/A	C3/C5 convertase	A0A1U9X8X9_HUMAN	50Step_Domain_p700.0_to_750.0	700	750	50.0 AA STEP	50	1	3	0	0	0	0	0.02	0.0176	1	0	DFHINLFR QHLGDVLNFLPL DFHINLFR QHLGDVLNFLPL		2	3	0	0	0	0
C8A	Complement component C8 alpha chain	CO8A_HUMAN	80Step_Domain_p0_to_80	0	80	80.0 AA STEP	80	0	0	0	0	0	0	0	1	0	0			0	0	0	0	0	0
C8A	Complement component C8 alpha chain	CO8A_HUMAN	80Step_Domain_p80.0_to_160.0	80	160	80.0 AA STEP	80	0	0	0	0	0	0	0	1	0	0			0	0	0	0	0	0
C8A	Complement component C8 alpha chain	CO8A_HUMAN	80Step_Domain_p160.0_to_240.0	160	240	80.0 AA STEP	80	0	2	0	0	0	0	0.0125	1	1	0	YHFEALADTGISSEFYDNANDLLSK		0	4	0	0	0	0
C8A	Complement component C8 alpha chain	CO8A_HUMAN	80Step_Domain_p240.0_to_320.0	240	320	80.0 AA STEP	80	0	0	0	0	0	0	0	1	0	0			0	0	0	0	0	0
C8A	Complement component C8 alpha chain	CO8A_HUMAN	80Step_Domain_p320.0_to_400.0	320	400	80.0 AA STEP	80	3	1	0	0	0	0	0.0125	0.6648	1	0	MESLGITSR MESLGITSR		6	1	0	0	0	0
C8A	Complement component C8 alpha chain	CO8A_HUMAN	80Step_Domain_p400.0_to_480.0	400	480	80.0 AA STEP	80	4	6	0	0	0	0	0.0375	0.0008	3	0	AMAVEDIISR HTSLGPLEAK YNPVVIDFEMQPIHEVLR AMAVEDIISR YNPVVIDFEMQPIHEVLR		8	11	0	0	0	0
C8A	Complement component C8 alpha chain	CO8A_HUMAN	80Step_Domain_p480.0_to_560.0	480	560	80.0 AA STEP	80	1	0	0	0	0	0	0	1	0	0	ALDQYLMEFNACR		2	0	0	0	0	0
C8A	Complement component C8 alpha chain	CO8A_HUMAN	80Step_Domain_p560.0_to_584.0	560	584	80.0 AA STEP	24	0	0	0	0	0	0	0	1	0	0			0	0	0	0	0	0
C8A	Complement component C8 alpha chain	CO8A_HUMAN	100Step_Domain_p0_to_100	0	100	100.0 AA STEP	100	0	0	0	0	0	0	0	1	0	0			0	0	0	0	0	0
C8A	Complement component C8 alpha chain	CO8A_HUMAN	100Step_Domain_p100.0_to_200.0	100	200	100.0 AA STEP	100	0	0	0	0	0	0	0	1	0	0			0	0	0	0	0	0
C8A	Complement component C8 alpha chain	CO8A_HUMAN	100Step_Domain_p200.0_to_300.0	200	300	100.0 AA STEP	100	0	2	0	0	0	0	0.01	1	1	0	YHFEALADTGISSEFYDNANDLLSK		0	4	0	0	0	0
C8A	Complement component C8 alpha chain	CO8A_HUMAN	100Step_Domain_p300.0_to_400.0	300	400	100.0 AA STEP	100	3	1	0	0	0	0	0.01	0.8616	1	0	MESLGITSR MESLGITSR		6	1	0	0	0	0
C8A	Complement component C8 alpha chain	CO8A_HUMAN	100Step_Domain_p400.0_to_500.0	400	500	100.0 AA STEP	100	5	6	0	0	0	0	0.04	0.0024	4	0	ALDQYLMEFNACR AMAVEDIISR HTSLGPLEAK YNPVVIDFEMQPIHEVLR AMAVEDIISR YNPVVIDFEMQPIHEVLR		10	11	0	0	0	0
C8A	Complement component C8 alpha chain	CO8A_HUMAN	100Step_Domain_p500.0_to_584.0	500	584	100.0 AA STEP	84	0	0	0	0	0	0	0	1	0	0			0	0	0	0	0	0
CRLF1	Cytokine receptor-like factor 1	CRLF1_HUMAN	Ig-like C2-type	38	131	DOMAINS	93	0	0	0	0	0	0	0	1	0	0			0	0	0	0	0	0
CRLF1	Cytokine receptor-like factor 1	CRLF1_HUMAN	Fibronectin type-III 1	137	232	DOMAINS	95	0	2	2	0	0	0	0.0105263	0.0276	1	0	DLALFTPYEIWVEATNR DLALFTPYEIWVEATNR		0	4	2	0	0	0
CRLF1	Cytokine receptor-like factor 1	CRLF1_HUMAN	Fibronectin type-III 2	237	341	DOMAINS	104	4	3	3	0	0	0	0.0288462	0	3	0	AGIWSEWSHPTAASTPR VEDSVDWK VGGLEDQLSVR AGIWSEWSHPTAASTPR VGGLEDQLSVR YRVEDSVDWK VEDSVDWK VGGLEDQLSVR		5	5	4	0	0	0
C2	Complement C2	CO2_HUMAN	50Step_Domain_p250.0_to_300.0	250	300	50.0 AA STEP	50	2	2	0	0	0	0	0.02	0.0176	1	0	ESASLMVDR ESASLMVDR		3	2	0	0	0	0
C2	Complement C2	CO2_HUMAN	50Step_Domain_p300.0_to_350.0	300	350	50.0 AA STEP	50	3	1	0	0	0	0	0.02	0.0176	1	0	DMTEVISSLENANYK VLMSVLNDNSR DMTEVISSLENANYK		6	1	0	0	0	0
C2	Complement C2	CO2_HUMAN	50Step_Domain_p650.0_to_700.0	650	700	50.0 AA STEP	50	2	2	0	0	0	0	0.02	0.0176	1	0	GESGGAVFLER GESGGAVFLER		3	2	0	0	0	0
C2	Complement C2	CO2_HUMAN	50Step_Domain_p700.0_to_750.0	700	750	50.0 AA STEP	50	1	3	0	0	0	0	0.02	0.0176	1	0	DFHINLFR QHLGDVLNFLPL DFHINLFR QHLGDVLNFLPL		2	3	0	0	0	0
F9 p22	Christmas factor	F2RM37_HUMAN	50Step_Domain_p300.0_to_350.0	300	350	50.0 AA STEP	50	2	1	0	0	0	0	0.02	0.018	1	0	EYTNIFLK FGSGYVSGWGR EYTNIFLK		3	1	0	0	0	0
F9	Coagulation factor IX	FA9_HUMAN	50Step_Domain_p300.0_to_350.0	300	350	50.0 AA STEP	50	2	1	0	0	0	0	0.02	0.018	1	0	EYTNIFLK FGSGYVSGWGR EYTNIFLK		3	1	0	0	0	0
N/A	cDNA FLJ60724; highly similar to Cartilage oligomeric matrix protein	B4DN75_HUMAN	50Step_Domain_p250.0_to_300.0	250	300	50.0 AA STEP	50	0	0	0	0	0	3	-0.02	0.0182	0	1		NTDENKWGDACDNCR	0	0	0	0	0	5
N/A	cDNA FLJ53644; highly similar to Four and a half LIM domains protein 1	B7Z5T3_HUMAN	50Step_Domain_p50.0_to_100.0	50	100	50.0 AA STEP	50	0	0	0	1	0	2	-0.02	0.0186	0	1		AIVAGDQNVEYK AIVAGDQNVEYK	0	0	0	1	0	3
N/A	cDNA FLJ53665; highly similar to Four and a half LIM domains protein 1	B7Z6U8_HUMAN	50Step_Domain_p50.0_to_100.0	50	100	50.0 AA STEP	50	0	0	0	1	0	2	-0.02	0.0186	0	1		AIVAGDQNVEYK AIVAGDQNVEYK	0	0	0	1	0	3
CRLF1	Cytokine receptor-like factor 1	CRLF1_HUMAN	80Step_Domain_p0_to_80	0	80	80.0 AA STEP	80	0	0	0	0	0	0	0	1	0	0			0	0	0	0	0	0
CRLF1	Cytokine receptor-like factor 1	CRLF1_HUMAN	80Step_Domain_p80.0_to_160.0	80	160	80.0 AA STEP	80	0	0	0	0	0	0	0	1	0	0			0	0	0	0	0	0
CRLF1	Cytokine receptor-like factor 1	CRLF1_HUMAN	80Step_Domain_p160.0_to_240.0	160	240	80.0 AA STEP	80	0	2	2	0	0	0	0.0125	0.0066	1	0	DLALFTPYEIWVEATNR DLALFTPYEIWVEATNR		0	4	2	0	0	0
CRLF1	Cytokine receptor-like factor 1	CRLF1_HUMAN	80Step_Domain_p240.0_to_320.0	240	320	80.0 AA STEP	80	3	2	3	0	0	0	0.0375	0	3	0	VEDSVDWK VGGLEDQLSVR VGGLEDQLSVR YRVEDSVDWK VEDSVDWK VGGLEDQLSVR		4	4	4	0	0	0
CRLF1	Cytokine receptor-like factor 1	CRLF1_HUMAN	80Step_Domain_p320.0_to_400.0	320	400	80.0 AA STEP	80	1	1	0	0	0	0	0.0125	0.4584	1	0	AGIWSEWSHPTAASTPR AGIWSEWSHPTAASTPR		1	1	0	0	0	0
CRLF1	Cytokine receptor-like factor 1	CRLF1_HUMAN	80Step_Domain_p400.0_to_422.0	400	422	80.0 AA STEP	22	1	0	0	0	0	0	0	1	0	0	NQDEGILPSGR		1	0	0	0	0	0
CRLF1	Cytokine receptor-like factor 1	CRLF1_HUMAN	100Step_Domain_p0_to_100	0	100	100.0 AA STEP	100	0	0	0	0	0	0	0	1	0	0			0	0	0	0	0	0
CRLF1	Cytokine receptor-like factor 1	CRLF1_HUMAN	100Step_Domain_p100.0_to_200.0	100	200	100.0 AA STEP	100	0	2	2	0	0	0	0.01	0.037	1	0	DLALFTPYEIWVEATNR DLALFTPYEIWVEATNR		0	4	2	0	0	0
CRLF1	Cytokine receptor-like factor 1	CRLF1_HUMAN	100Step_Domain_p200.0_to_300.0	200	300	100.0 AA STEP	100	3	4	5	0	0	0	0.04	0	4	0	VEDSVDWK VGGLEDQLSVR DLALFTPYEIWVEATNR VGGLEDQLSVR YRVEDSVDWK DLALFTPYEIWVEATNR VEDSVDWK VGGLEDQLSVR		4	8	6	0	0	0
CRLF1	Cytokine receptor-like factor 1	CRLF1_HUMAN	100Step_Domain_p300.0_to_400.0	300	400	100.0 AA STEP	100	1	1	0	0	0	0	0.01	0.758	1	0	AGIWSEWSHPTAASTPR AGIWSEWSHPTAASTPR		1	1	0	0	0	0
CRLF1	Cytokine receptor-like factor 1	CRLF1_HUMAN	100Step_Domain_p400.0_to_422.0	400	422	100.0 AA STEP	22	1	0	0	0	0	0	0	1	0	0	NQDEGILPSGR		1	0	0	0	0	0
C4A	C4a anaphylatoxin	A0A0G2JPR0_HUMAN	Anaphylatoxin-like	702	736	DOMAINS	34	0	0	0	0	0	0	0	1	0	0			0	0	0	0	0	0
C4A	C4a anaphylatoxin	A0A0G2JPR0_HUMAN	NTR	1595	1742	DOMAINS	147	3	4	0	13	12	7	-0.0612245	0.0014	2	11	GLQDEDGYR ITQVLHFTK VEYGFQVK ITQVLHFTK VEYGFQVK	GLQDEDGYR GLQDEDGYR GLQDEDGYR	6	4	0	2	1	1
ITIH4	Inter-alpha-trypsin inhibitor heavy chain H4	ITIH4_HUMAN	50Step_Domain_p150.0_to_200.0	150	200	50.0 AA STEP	50	3	5	16	0	0	0	0.16	0.019	8	0	LGVYELLLK VRPQQLVK ITFELVYEELLK LGVYELLLK LGVYELLLK		5	6	2	0	0	0
FBLN2	Fibulin-2	FBLN2_HUMAN	50Step_Domain_p1100.0_to_1150.0	1100	1150	50.0 AA STEP	50	1	0	0	0	0	0	0	0.0192	0	0	GNEEGYFGTR		1	0	0	0	0	0
FBLN2	Fibulin-2	FBLN2_HUMAN	50Step_Domain_p1150.0_to_1184.0	1150	1184	50.0 AA STEP	34	1	0	0	0	0	0	0	0.0192	0	0	DFALDVEMK		2	0	0	0	0	0
CPN2	Carboxypeptidase N subunit 2	CPN2_HUMAN	50Step_Domain_p350.0_to_400.0	350	400	50.0 AA STEP	50	1	1	0	0	0	0	0.02	0.0198	1	0	LELLSLSK LELLSLSK		1	2	0	0	0	0
CPN2	Carboxypeptidase N subunit 2	CPN2_HUMAN	50Step_Domain_p450.0_to_500.0	450	500	50.0 AA STEP	50	1	1	0	0	0	0	0.02	0.0198	1	0	AGGSWDLAVQER AGGSWDLAVQER		1	1	0	0	0	0
N/A	cDNA FLJ50237; highly similar to Homo sapiens fibulin 2 (FBLN2); transcript variant 1; mRNA	B7Z6T9_HUMAN	50Step_Domain_p450.0_to_500.0	450	500	50.0 AA STEP	50	2	0	0	0	0	0	0.02	0.0198	1	0	DFALDVEMK GNEEGYFGTR		3	0	0	0	0	0
GBA	Lysosomal acid glucosylceramidase	GLCM_HUMAN	50Step_Domain_p100.0_to_150.0	100	150	50.0 AA STEP	50	1	0	1	0	0	0	0.02	0.0198	1	0	SYFSEEGIGYNIIR SYFSEEGIGYNIIR		1	0	1	0	0	0
GBA	Lysosomal acid glucosylceramidase	GLCM_HUMAN	50Step_Domain_p150.0_to_200.0	150	200	50.0 AA STEP	50	1	0	1	0	0	0	0.02	0.0198	1	0	SYFSEEGIGYNIIR SYFSEEGIGYNIIR		1	0	1	0	0	0
GBA	Lysosomal acid glucosylceramidase	GLCM_HUMAN	50Step_Domain_p300.0_to_350.0	300	350	50.0 AA STEP	50	1	0	1	0	0	0	0.02	0.0198	1	0	VVLTDPEAAK VVLTDPEAAK		1	0	1	0	0	0
N/A	Glucosylceramidase	A0A223PQI4_HUMAN	50Step_Domain_p100.0_to_150.0	100	150	50.0 AA STEP	50	1	0	1	0	0	0	0.02	0.0198	1	0	SYFSEEGIGYNIIR SYFSEEGIGYNIIR		1	0	1	0	0	0
N/A	Glucosylceramidase	A0A223PQI4_HUMAN	50Step_Domain_p150.0_to_200.0	150	200	50.0 AA STEP	50	1	0	1	0	0	0	0.02	0.0198	1	0	SYFSEEGIGYNIIR SYFSEEGIGYNIIR		1	0	1	0	0	0
N/A	Glucosylceramidase	A0A223PQI4_HUMAN	50Step_Domain_p300.0_to_350.0	300	350	50.0 AA STEP	50	1	0	1	0	0	0	0.02	0.0198	1	0	VVLTDPEAAK VVLTDPEAAK		1	0	1	0	0	0
N/A	Glucosylceramidase	B2R6A7_HUMAN	50Step_Domain_p100.0_to_150.0	100	150	50.0 AA STEP	50	1	0	1	0	0	0	0.02	0.0198	1	0	SYFSEEGIGYNIIR SYFSEEGIGYNIIR		1	0	1	0	0	0
[truncated: 19,097 more rows]
[truncated: 1 more columns]

## Sheet: PLF of 50 aa protein segments 
Table S6: Full peptide location fingerprinting analysis of anterior inner AF IVD datasets. Protein primary sequences were computationally divided into 50 aa-sized segments and peptide sequences, and their spectrum counts, were mapped and summed within each segment. Peptide counts per segment were then normalised between aged and young groups based on the median whole protein spectrum count and av…
[truncated: 1,595 more rows]

[truncated: 1 more sheets: List of biomarker candidates]
